# Supplementary material for: Active transcriptomic and proteomic reprogramming in the C. elegans nucleotide excision repair mutant xpa-1
Source: PubMed Central journal article supplement — Nucleic Acids Res. 2013 Apr 10;41(10):5368–81. doi: 10.1093/nar/gkt225 (PMC3664812; doi:10.1093/nar/gkt225), 2013-04-10
Supplement: supp_gkt225_nar-02402-d-2012-File007.pdf [file supp_gkt225_nar-02402-d-2012-File007.pdf]

## **Supporting Material Arczewska et al.**

### **Supporting information listing.**

Additional supporting information may be found in the online version of this article:

- **Supplementary Materials and Methods**
- **Fig. S1 Proteomic vs. transcriptomic analysis**
- **Fig. S2 Distribution of developmental stages in mixed worm cultures**
- **Fig. S3 Proteasome activity and proteasome subunit levels are unchanged in *xpa-1* mutant**
- **Fig. S4 Depletion of SPC-1 and SMA-1 in the wild type and *xpa-1* gives non-synchronous populations with broad distribution of worm stages.**
- **Fig. S5 Loss of NTH-1 restores normal lifespan of *xpa-1* mutant**
- **Fig. S6 NTH-1 and XPC-1 are upstream factors required for transcriptome modulation in *xpa-1*.**
- **Supplementary Table S1 Transcripts differentially regulated in *xpa-1(ok698)***
- **Supplementary Table S2 Proteins identified in proteomic analysis**
- **Supplementary Table S3 Peptides identified in proteomic analysis**
- **Supplementary Table S4 Statistical analysis of identified protein hits**

## EXPERIMENTAL PROCEDURES

### ***C. elegans* and bacterial strains**

*C. elegans* strains were cultured at 20°C on solid NGM agar plates using standard procedures (20). Wild type Bristol N2, RB877 *nth-1(ok724)* III, RB864 *xpa-1(ok698)* I and CL2166 [*dvl-19[pAF15(gst-4::gfp::NLS)]* III] (21) *C. elegans*, as well as HT115(DE3) and OP50 *E. coli* strains were obtained from The *Caenorhabditis* Genetics Centre (CGC) (University of Minnesota, St. Paul, MN, USA), funded by the National Institute of Health (NIH) National Center for Research Resources. RB864 *xpa-1(ok698)* I and RB877 *nth-1(ok724)* III were backcrossed 5 times into the N2 (wild type) reference strain and are referred to below as the *xpa-1* and *nth-1*, respectively. Double mutant strain *xpa-1(ok698); nth-1(ok724)* was generated as described previously (19) and is referred to below as *xpa-1; nth-1*.

RNAi feeding constructs in pL4440 vector (65) were obtained from the Ahringer RNAi feeding library (<http://www.gurdon.cam.ac.uk/~ahringerlab/pages/rnai.html>), except from HT115(DE3) pL4440-*xpc-1* *E. coli*, which was kindly provided by Wim Vermeulen (Erasmus Medical Center, Netherlands). pL4440-*slr-2* vector was generated from a *C. elegans* cDNA library (a kind gift from Simon J. Boulton) using Gateway technique (Invitrogen) and transformed into HT115(DE3) *E. coli* cells. Sequences of all RNAi feeding constructs were verified by sequencing.

### **RNA isolation and microarray processing**

Mixed stage *C. elegans* populations were cultured on HT115(DE3) pL4440 *E. coli* as a food source for 3 to 4 d. For each sample group five replicates were analyzed. For each replicate, nematodes from about 10 to 20 9-cm NGM plates were collected using

sucrose floatation. Starved plates were discarded. Packed worm pellets were combined with TRIZOL reagent (Invitrogen) and kept at -80°C until further processing. Next, nematodes were disrupted using Mini-Beadbeater-16 (BioSpec Products, Bartlesville, USA) and total RNA was extracted according to manufacturer's instructions. Synthesis of double stranded cDNA, biotin-labeling, purification and fragmentation of aRNA was performed using 3' IVT Express kit (Affymetrix) according to manufacturer's instructions. All further steps were performed at NTNU Genomics Resource Center (Trondheim, Norway). Quality of RNA preparations was verified on a Agilent 2100 Bioanalyzer. Fragmented aRNA samples were hybridized to the Affymetrix GeneChip *C. elegans* Genome Arrays using Affymetrix hybridization oven 640, washed and stained using Affymetrix Fluidics station 450 and scanned using Affymetrix GeneChip 3000 7G scanner with autoloader. Pre-processing of the raw-data (Affymetrix .cel files) was done according to standard analysis pipeline at the Bioinformatics and Expression Analysis (BEA) Core Facility at Karolinska Institutet, Huddinge, Sweden ([www.bea.ki.se](http://www.bea.ki.se)). Briefly, .cel-files were imported into the Affymetrix software Expression Console, pre-processed and normalized using Global Median, following background correction (PM-GCBG) and the summarization method of Plier. No outlier effects were revealed by Quality Control (QC) plots. All data related to the full arrays as well as un-processed and processed data, are found at NCBI Gene Expression Omnibus (<http://www.ncbi.nlm.nih.gov/geo/>), GSE39252.

### **Extended data- and statistical analysis**

After pre-processing and normalization, a Student's t-test was executed to reveal transcripts statistically significantly regulated at the 95% confidence level ( $p < 0.05$ )

between *xpa-1* and wild type (N2). In addition to the statistically significance threshold a comparative 4-fold change filtering on the data was conducted. The Gene Set Enrichment Analysis (GSEA) to reveal enriched/overrepresented Gene Ontology (GO) Biological Processes (BP) was performed using Cytoscape (<http://www.cytoscape.org/>) and the BINGO plugin (22). The analysis was executed using the Hyper-geometric Test with Benjamini-Hochberg False Discovery Rate (FDR) correction. Chi-square tests with Yate's correction were calculated to evaluate the statistical significance of association between our data and the different studies referenced in the main manuscript. Here, we used the web-based statistical tool found at <http://www.graphpad.com/quickcalcs/index.cfm>.

### ***C. elegans* lysate preparation for quantitative proteomic analysis**

Mixed stage wild type and *xpa-1* nematode populations were cultured on HT115(DE3) pL4440 *E. coli* as a food source for 3 to 4 d. For each sample group four replicates were analyzed. For each replicate nematodes from about 10 9-cm NGM plates were collected and washed twice in H<sub>2</sub>O to remove residual bacteria. Starved plates were discarded. Crude extracts were prepared by bead beating from packed worm pellets as described by us before (24) and protein concentrations were determined using Bradford reagent (BioRad). Next, samples containing 100 µg of protein and 1x SDS sample buffer were prepared and separated by SDS-PAGE with 4% stacking gel and 10% separation gel using a Mini-Protean 3 cell (BioRad, Oslo, Norway). Gels were stained with Coomassie Brilliant Blue G-250 (Serva, Heidelberg, Germany) employing the blue silver staining technique (66).

### ***In-situ* Lys- C digestion and Isobaric Peptide Termini Labeling**

The stained gel lanes were cut into 16 fractions for in-gel digestion with 0.06 µg of Lys-C (Sigma-Aldrich, Oslo, Norway) in 25 mM Tris, 1 mM EDTA, and pH 8 for 16 h at 37 °C. For each band, the Lys-C produced peptides were purified with µ-C18 ZipTips (Millipore, Billerica, MA), and dried using a Speed Vac concentrator (Savant, Holbrook, U.S.A.).

Rapid-IPTL was performed as described previously (25). Briefly, purified and dried Lys-C peptide digests were resuspended in 20 mM succinic anhydride (Sigma-Aldrich, Oslo, Norway) for N2 samples and in tetradeuterated succinic anhydride-*d*<sub>4</sub> (Larodan Fine Chemicals AB, Malmö, Sweden) for *xpa-1* ones in 50 mM sodium acetate. To the N-terminal succinylated peptides, 200 mM triethylammonium bicarbonate was directly mixed, followed by 4% formaldehyde (N2) and dideuterated formaldehyde-*d*<sub>2</sub> (*xpa-1*) in water, and 600 mM sodium cyanoborohydride in both N2 and *xpa-1* samples. Subsequently, 8 µl of 1% ammonium hydroxide was added and incubated for one minute, followed by adding 4 µl of 5% formic acid to quench the dimethylation. In parallel, 1 pmol BSA was used as a control in both N-terminal peptide succinylation and dimethylation of lysine residues. Labeled peptides were purified with µ-C18 ZipTips (Millipore, Billerica, MA), and dried using a Speed Vac concentrator (Savant, Holbrook, U.S.A.).

### **Mass spectrometry**

The dried peptides were dissolved in 1% formic acid, 5% acetonitrile in water, mixed in a 1:1 ratio (N2:*xpa-1*) and injected into an Ultimate 3000 nanoLC system (Dionex, Sunnyvale CA, U.S.A.) connected to an LTQ Orbitrap XL mass spectrometer (ThermoScientific, Bremen, Germany). Column dimensions, LC buffer and gradient, and other instrument parameters were as previously described (25).

An Ultraflex II (Bruker Daltonics, Bremen, Germany) matrix-assisted laser desorption ionization tandem time-of-flight (MALDI-TOF/TOF) mass spectrometer was used after external calibration as previously described (25) to follow the reactions of BSA control samples.

### **Database searches and analysis**

Raw LTQ Orbitrap XL data were processed using DtaSuperCharge15 version 1.37 to generate peak lists in \*.mgf format. A database search was performed using an in-house Mascot search engine tool version 2.2.1 to search from Wormpep 221 ([www.wormbase.org](http://www.wormbase.org)), containing 194,666 sequences from 24,890 proteins. Lys-C was set as enzyme, no missed cleavage site, a tolerance of 10 ppm for the precursor ion and 0.6 Da for the MS/MS fragments, methionine oxidation and N-terminal protein acetylation as variable modifications were selected. The two corresponding modifications N-terminal succinylation/lysine dimethylation-d4 or N-terminal succinylation-d4/lysine dimethylation, respectively, were set as variable modifications including neutral loss as satellite of 4 Da (2H(2)) for N-terminal succinylation-d4 and lysine dimethylation-d4 and neutral loss as satellite of -4 Da (2H(-2)) for N-terminal succinylation and lysine dimethylation.

Protein identification and validation was performed using the IsobariQ software (67) including the force-found algorithm to mine the spectra where Mascot failed to identify opposite sequences (false discovery rates for peptide matches above an identity threshold were 4.31%, 3.38%, 3.81%, and 3.28% respectively, for the four replicates). No sequence suggestion below a Mascot ion score of 10 was allowed. Proteins were loaded if a minimum of two peptides and the significance of  $p < 0.05$  were achieved. The minimal number of ratios for force-find hits was set to 4. The data

were quantified with the following options: Protein scoring was set to MudPit and the MS/MS tolerance to 0.6 Da. Bold peptides (Mascot option) was required for the quantification and unique and razor peptides were used. The “normalize rawfiles independently” checkbox was checked and the data were quantified using VSN normalization (25). GO enrichment analysis was performed using Cytoscape (68) with the BiNGO plug-in (68).

### **Quantitative western blot analysis**

To validate quantitative proteomic results western blot analysis was performed on equal amounts of whole nematode crude protein extracts prepared by bead beating from 3-day-old mixed stage cultures of N2 and *xpa-1* fed with HT115(DE3) pL4440 *E. coli*. Proteins were detected using commercial rabbit anti- $\alpha$  actin antibody (Abcam) or rabbit anti-Sti-1/Hop antibody (69) or rabbit anti-DHS-21 (70) antibody, which were kindly provided by Klaus Richter (Technische Universität München, Garching, Germany) and Joohong Ahnn (Hanyang University, Republic of Korea) respectively. Next, blots were incubated with HRP-linked anti-rabbit antibody (Cell Signaling) and detection was performed using SuperSignal West Pico kit (Pierce). Blots were exposed to X-ray films (GE Healthcare), which were then scanned and intensities quantitated using ImageJ. Finally, signal intensities determined for DHS-21 and Sti-1/Hop proteins were divided by signal intensity determined for  $\alpha$  actin in a given protein sample to account for possible differences in sample loading. For each strain western blot analysis was performed in four replicates.

Evaluation of GST-4::GFP protein levels in transgenic CL2166 strain was performed on whole-nematode protein extracts prepared from ~200 adult nematodes. Upon collection in S-Basal, nematodes were washed and then immediately frozen with

liquid nitrogen. Samples were subsequently thawed on ice, subjected to two cycles of sonication of ten seconds each (30% power, 30% amplitude on BANDELIN SONOPLUS HD 3100) in a final volume of 300  $\mu$ l of RIPA buffer plus inhibitor cocktail (SIGMA P2714), and centrifuged at 4°C for 15 min to eliminate insoluble debris. Following protein quantitation (Bradford) in the supernatant, protein levels were measured by western blotting, quantified using ImageJ software, and normalized against actin. Antibodies employed were: anti-GFP (cat#632376 Clontech, 1:1000) and anti-Actin (cat#A5441 Sigma, clone AC-15, 1:5000).

### **Quantification of ATP and reactive oxygen species content**

For ATP and ROS measurements, population of ~1000 synchronized young adult nematodes were collected in S-basal, washed twice, immediately frozen in liquid nitrogen and stored at -80°C. Frozen nematodes were then thawed in ice and subjected to sonication (see western blot procedure) in a final volume of 300  $\mu$ l of S-Basal plus inhibitor cocktail (SIGMA P2714). ATP content was immediately measured, in duplicate from each biological sample, in a Wallac 1420 Victor microplate reader in flat bottom 96-well dark plates, using 25  $\mu$ g of extract with the ATP Bioluminescence Assay Kit CLS II (Roche) according to the manufacturer's protocol. Each assay included a sample with no extract as background. Reactive oxygen species were quantified utilizing 50  $\mu$ g of extract incubated in 500  $\mu$ l of a 5  $\mu$ M H<sub>2</sub>-DCF-DA (2'-7'-dichlorofluorescein-diacetate) solution in S-Basal plus inhibitor cocktail. Each sample was read in triplicate (150  $\mu$ l each) using flat bottom 96-well plates in a Wallac 1420 Victor microplate reader at excitation/emission wavelengths of 485 and 528 nm. Readings were obtained over a time frame of 2 h to ensure that the reaction

was occurring properly; the initial fluorescence was always subtracted from the last reading. Shown are average data collected at the 1 h time point.

### **Estimation of proteasomal activity, polyubiquitinated proteins and proteasome 20S $\alpha$ subunits levels**

Age-synchronized young adult nematodes (4 d old) were collected to M9 prior to freezing in -80°C. Nematodes were lysed using Dounce homogenizer and native gel lysis buffer (46). Native gel electrophoresis and developing of the gel was performed as reported with minor modifications, as described previously (46).

To analyze polyubiquitinated proteins and proteasome 20S $\alpha$  subunits western blots were ran from the same protein extracts as native gels. Proteasome 20S  $\alpha$ 1,2,3,5,6,&7 subunits antibody (Enzo Life Sciences),  $\alpha$ -tubulin antibody (Sigma) and FK1 antibody for polyubiquitinated proteins (Enzo Life Sciences) were used in blotting. Signal levels were adjusted using Photoshop 9.0 (Adobe Systems).

### **Body length measurement**

Growth was measured using modification of standardized BAC assay (ISO protocol ISO10872:2010.). Synchronized N2 and *xpa-1* nematodes cultured on solid NGM agarose plates containing 2 mM IPTG and 50  $\mu$ g/ml of carbenicyllin seeded with HT115(DE3) *E. coli* carrying pL4440, pL4440-*sti-1*, pL4440-*sma-1* or pL4440-*spc-1* RNAi feeding constructs were cultured until young adult stage. The nematodes were then synchronized by bleaching using standard procedures and hatched overnight in M9 buffer. On the next day, L1s were transferred onto solid NGM agarose plates seeded with appropriate RNAi food and cultured for approximately 50 h until late L4/young adult stage. Next nematodes were collected and washed twice in M9 buffer

with spinning (1500 rpm, 1 min), suspended in 0.5 ml of M9 buffer and 0.5 ml of 300 mg/l Bengal Rose (Sigma-Aldrich) was added. Samples were then transferred to 24-well plates, incubated for 10 min at 80°C and stored for up to 4 weeks at 4°C until nematode body length measurement. This procedure resulted in straightening of nematode bodies and induced pink coloration, what facilitates measurement. Finally, nematodes were transferred on microscope slides, their images were captured using Zeiss SteREO Lumar V12 microscope at 45x magnification and body lengths of individual nematodes (50 for pL4440-*sma-1* and pL4440-*spc-1* feeding and 30 for pL4440 and pL4440-*sti-1* feeding) were measured using AxioVision 4.8 software. Experiments were performed in triplicate and finally all measurements were combined into a single dataset to perform statistical analysis. Outliers were defined as values below 1st quartile – (1.5 × interquartile range) or above 3rd quartile + (1.5 × interquartile range).

### **Lifespan and Statistical Analysis**

Survival curves and statistical analyses were carried out as previously described (71). Survival analysis began from hatching and were recorded at 20°C using synchronous populations of 70 to 80 nematodes per strain. Nematodes were scored as dead or alive and transferred every day onto fresh plates seeded with *E. coli* OP50 or HT115(DE3) strain during the fertile period, and then every other day or every 3 d until death. Nematodes were considered dead when they stopped pharyngeal pumping and responding to touch. Nematodes that die because of internal bagging, desiccation due to crawling on the edge of the plates, or gonad extrusion were scored as censored. These nematodes were included in life-span analyses up to the point of censorship and were weighted by half in mortality calculations. We calculated mean, standard

deviation of the mean, and P value using the log-rank test, from pooled population of nematodes. Figures display survival curves of pooled populations utilized for statistical analysis.

### **DNA lesion measurements**

Mixed stage nematode populations were grown on NGM agarose plates (0.3% NaCl, 1.5% agarose, 0.75% peptone) seeded with HT115(DE3) pL4440 and collected by sucrose floatation. Nematodes were pooled from approximately 40 9-cm petri dishes per replicate, and 6 replicates were collected per strain. Harvested nematodes were snap-frozen in liquid N<sub>2</sub> and ground with mortar and pestle. Ground nematodes were then dissolved in G2 buffer (Qiagen) and homogenized in a dounce homogenizer. Samples were digested at 37°C with DNase-free RNase A (AppliChem) for 30 min, followed by 1 h digestion with Proteinase K (Sigma-Aldrich) at 55°C. DNA was then isolated using Qiagen 500/G Genomic tip columns following manufacturer instructions, precipitated in isopropanol and stored in absolute ethanol at -80°C until further processing.

For LC/MS/MS lesion determinations, collected DNA was washed with 70% ethanol, dried and then dissolved in water. Isotopically labeled internal standards, <sup>15</sup>N<sub>5</sub> R-cdA and <sup>15</sup>N<sub>5</sub> S-cdA (kindly provided by Pawel Jaruga and Miral Dizdaroglu), were added to 50 µg aliquots of genomic *C. elegans* DNA. Samples were dried under vacuum and then redissolved in digestion buffer and digested overnight at 37°C using a combination of nuclease P1 (US Biological, Salem, MA), phosphodiesterase (Sigma-Aldrich, St. Louis, MS) and alkaline phosphatase (Roche Diagnostics, Indianapolis, IN). Cyclic-purines as well as other released nucleosides were isolated by filtration using 3 kDa centrifugal filters (Pall, Port Washington, NY) and collecting the filtrate.

Samples were injected on a TSQ Quantum Ultra AM triple quadrupole (Thermo Fisher, Waltham, MA), separated on a reverse-phased column (Luna, Torrence, CA), and detected with an ESI-MS/MS spectrometer (Thermo Fisher) in MRM mode. *R*-cdA and *S*-cdA lesion levels were determined by taking the ratio of co-eluting analyte and isotopically labeled internal standard chromatographic peaks using the ratio from the  $m/z$  250 $\rightarrow$  $m/z$  165 and  $m/z$  255 $\rightarrow$  $m/z$  169 mass transitions for the analyte and internal standard respectively. In-depth discussion of separation and identification of cyclopurine lesions is described elsewhere (30). Statistical analysis was performed in GraphPad software (Graphpad Software, La Jolla, CA) using one way ANOVA and Newman-Keuls post-test to determine statistical significance of differences between groups.

For GC/MS/MS lesion determinations, *C. elegans* DNA pellets were dissolved in distilled, deionized water (ddH<sub>2</sub>O) and the DNA concentration was determined by spectrophotometric absorbance at 260 nm (absorbance of 1 = 50  $\mu$ g of DNA/mL). Sample aliquots containing 50  $\mu$ g DNA were prepared from each *C. elegans* extract and the four lesion internal standard compounds were added to each sample. The samples were dried under vacuum and then stored at 4 °C prior to enzymatic digestion. Subsequent to enzymatic digestion, samples were dissolved in a buffer consisting of 50 mmol/L sodium phosphate, 100 mmol/L potassium chloride, 1 mmol/L EDTA and 100  $\mu$ mol/L dithiothreitol (pH 7.4). To this solution, 2  $\mu$ g each of *E. coli* formamidopyrimidine DNA glycosylase - Fpg (Trevigen) and *E. coli* endonuclease (III) - EndoIII (Trevigen) were added and the sample was digested at 37 °C for 1 h. The digestion was terminated with the addition of ice-cold absolute ethanol in combination with sample storage at -20°C. Samples were centrifuged at 14,000 g for 30 min, supernatant fractions containing the excised DNA lesions were

transferred to glass vials and the solvent was removed under Speed Vac. Samples were solubilized in ddH<sub>2</sub>O, lyophilized, and then trimethylsilylated using bis(trimethylsilyl)trifluoroacetamide) / 1% trimethylchlorosilane in pyridine (120 °C for 30 min). Following derivatization, samples were analyzed by GC/MS/MS.

Mass spectrometry analyses were performed on an Agilent 7000 series triple quadrupole GC/MS/MS system (Agilent Technologies) operated in positive ion mode with electron ionization. The modular system consisted of a 7693 autosampler, a 7890A GC oven and a 7000 triple quadrupole (MS/MS) mass analyzer set to widest resolution for MS1 and MS2. The GC column was an HP-Ultra 2 high-resolution fused silica capillary column (12.5 m, 0.2 mm i.d.) coated with cross-linked 5% phenylmethylsilicone gum phase (film thickness, 0.33 µm) (Agilent Technologies). Gas chromatography was performed with a temperature programmed ramp from 130 °C to 300 °C (130 °C, 2 min hold, 8 °C per min to 207 °C, 0 min hold; 10 °C per min to 300 °C, 4 min hold). Trimethylsilyl derivatives of DNA lesions and their stable isotope-labeled analogues were detected in multiple reaction monitoring (MRM) mode. The following instrumental parameters were used for detection and quantification of the DNA lesions in MRM mode: dwell time = 44 ms, collision gas = nitrogen (1.5 mL / min), quench gas = helium (2.25 mL / min), inject mode = split, split ratio = 10:1, split flow = 7.8584 mL / min, inlet temperature = 250 °C, inlet pressure = 9.428 psi (6.500 x 10<sup>1</sup> kPa), MS/MS source temperature = 130 °C, repeller voltage = 15.4 V, extractor voltage = 6.3 V, MS1 quad DC = 11.4 V, MS2 quad DC = 0.4 V, collision cell hexapole RF = 400 V, collision cell hexapole DC = 11.4 V, collision cell entrance = 12.4 V, collision cell exit 5.4 V, electron energy = - 70 V, delta EMV = 800 V, injection volume = 5 µL, run time = 24.75 min. The relevant MRM mass transitions were:  $m/z$  369 →  $m/z$  354 and  $m/z$  372 →  $m/z$  357 for

FapyAde / FapyAde-<sup>13</sup>C, <sup>15</sup>N<sub>2</sub>;  $m/z$  457  $\rightarrow$   $m/z$  442 and  $m/z$  460  $\rightarrow$   $m/z$  445 for FapyGua / FapyGua-<sup>13</sup>C, <sup>15</sup>N<sub>2</sub>;  $m/z$  455  $\rightarrow$   $m/z$  440 and  $m/z$  460  $\rightarrow$   $m/z$  445 for 8-OH-Gua / 8-OH-Gua-<sup>15</sup>N<sub>5</sub>;  $m/z$  367  $\rightarrow$   $m/z$  352 and  $m/z$  370  $\rightarrow$   $m/z$  355 for 8-OH-Ade / 8-OH-Ade-<sup>13</sup>C, <sup>15</sup>N<sub>2</sub> (30). MRM chromatograms were integrated using MassHunter software (Agilent Technologies) and the measured lesion levels were determined using the MRM area ratios from the modified DNA base of interest and its labeled analogue in conjunction with the known amount of the labeled analogue spiked into each sample.

### **Regulation of transcriptional responses induced in *xpa-1* by down-regulation of repair proteins and transcription factors**

Synchronized N2 and *xpa-1* nematodes were cultured for 3 generations on solid NGM agarose plates containing 2 mM IPTG and 50 µg/ml of carbenicillin seeded with HT115(DE3) *E. coli* carrying pL4440, pL4440-*xpc-1*, pL4440-*csb-1*, pL4440-*nth-1*, pL4440-*rad-23*, pL4440-*daf-16*, or pL4440-*slr-2*. In parallel N2 and *xpa-1* nematodes were also cultured for 1 generation on HT115(DE3) *E. coli* carrying pL4440-*skn-1*, pL4440-*ddb-1*, or pL4440 (as a control), since these foods resulted in embryonic lethality. Nematodes were collected at the L4 stage in M9 buffer, washed twice in H<sub>2</sub>O, disrupted by bead beating in RTL buffer (Qiagen) and RNA was isolated using RNeasy Mini Kit (Qiagen) according to the manufacturer's protocol. cDNA synthesis was performed using the iScript cDNA synthesis kit (BioRad) according to the manufacturer's instructions using 100 ng RNA per reaction. Quantitative PCR (qPCR) was performed using *tbg-1*, *gst-4*, *sod-3*, *hsp-1* and *aqp-1* primers as described by us before (24).

## Flow cytometry

The lengths of nematodes were measured using a COPAS BIOSORT (Union Biometrica). Standard procedure was used for handling, with manufacturer recommended settings for pressure. The flow rate was in the range of 10 to 50 incidents/second. For all the plates, opacity and Time-of-Flight (TOF) were measured. The data was analyzed and visualized using R (72) and Bioconductor (<http://www.bioconductor.org/>) software packages flowCore packages version 1.24.0, flowViz 1.22.0, and flowStats version 1.16.0 (<http://www.bioconductor.org/packages/2.11/bioc/html/flowCore.html#software>).

Source code is available on demand. A gating region was set up to filter out air bubbles and small debris, as well as larvae with saturated measurements. Additional gating regions were set up to differentiate between larval stages using TOF, with cut-offs determined from visual inspection of WT nematodes under the microscope. To adjust for potential overall difference in length for the mutant, the lengths were normalized by average population length (WT 8% longer on average). This did not have any major impact on the final result (data not shown). P-values were calculated by comparing, for each larval stage, wild type vs mutant by a t-test (no multiple-hypothesis correction in given values).

## Supporting references

65. Timmons, L. and Fire, A. (1998) Specific interference by ingested dsRNA. *Nature*, **395**, 854.
66. Candiano, G., Bruschi, M., Musante, L., Santucci, L., Ghiggeri, G.M., Carnemolla, B., Orecchia, P., Zardi, L. and Righetti, P.G. (2004) Blue silver: a very sensitive colloidal Coomassie G-250 staining for proteome analysis. *Electrophoresis*, **25**, 1327-1333.

67. Arntzen, M.O., Koehler, C.J., Barsnes, H., Berven, F.S., Treumann, A. and Thiede, B. (2011) IsobariQ: software for isobaric quantitative proteomics using IPTL, iTRAQ, and TMT. *Journal of proteome research*, **10**, 913-920.
68. Shannon, P., Markiel, A., Ozier, O., Baliga, N.S., Wang, J.T., Ramage, D., Amin, N., Schwikowski, B. and Ideker, T. (2003) Cytoscape: a software environment for integrated models of biomolecular interaction networks. *Genome Res*, **13**, 2498-2504.
69. Gaiser, A.M., Brandt, F. and Richter, K. (2009) The non-canonical Hop protein from *Caenorhabditis elegans* exerts essential functions and forms binary complexes with either Hsc70 or Hsp90. *Journal of molecular biology*, **391**, 621-634.
70. Son le, T., Ko, K.M., Cho, J.H., Singaravelu, G., Chatterjee, I., Choi, T.W., Song, H.O., Yu, J.R., Park, B.J., Lee, S.K. *et al.* (2011) DHS-21, a dicarbonyl/L-xylulose reductase (DCXR) ortholog, regulates longevity and reproduction in *Caenorhabditis elegans*. *FEBS letters*, **585**, 1310-1316.
71. Ventura, N., Rea, S.L., Schiavi, A., Torgovnick, A., Testi, R. and Johnson, T.E. (2009) p53/CEP-1 increases or decreases lifespan, depending on level of mitochondrial bioenergetic stress. *Aging cell*, **8**, 380-393.
72. Team, R.C. (2012), Vienna, Austria.

## A) Proteomics

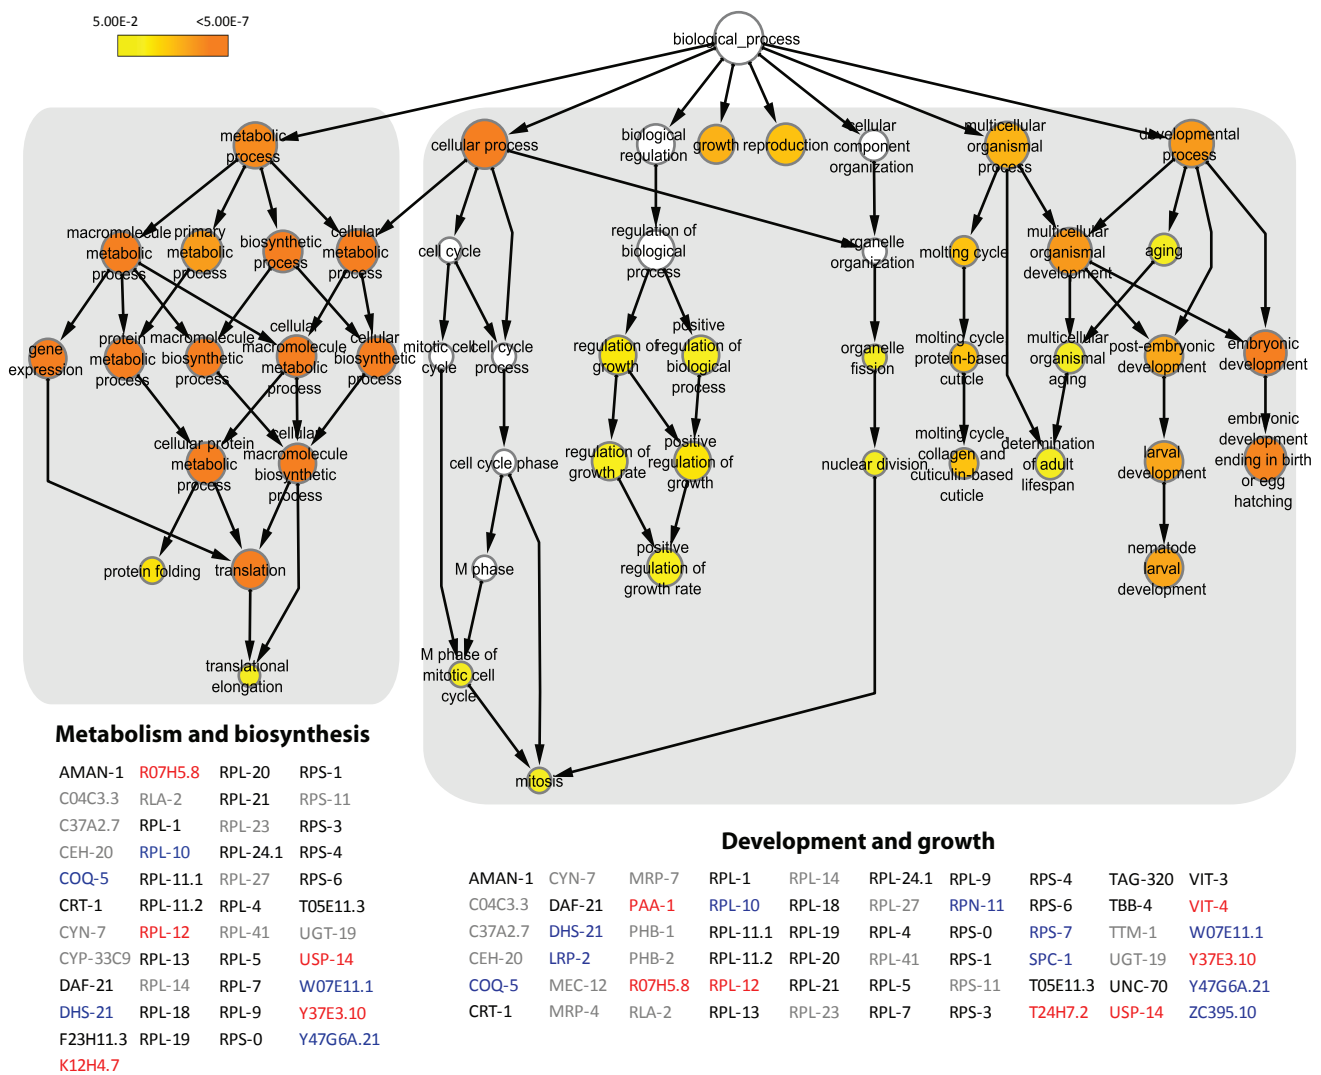

## B) Transcriptomics

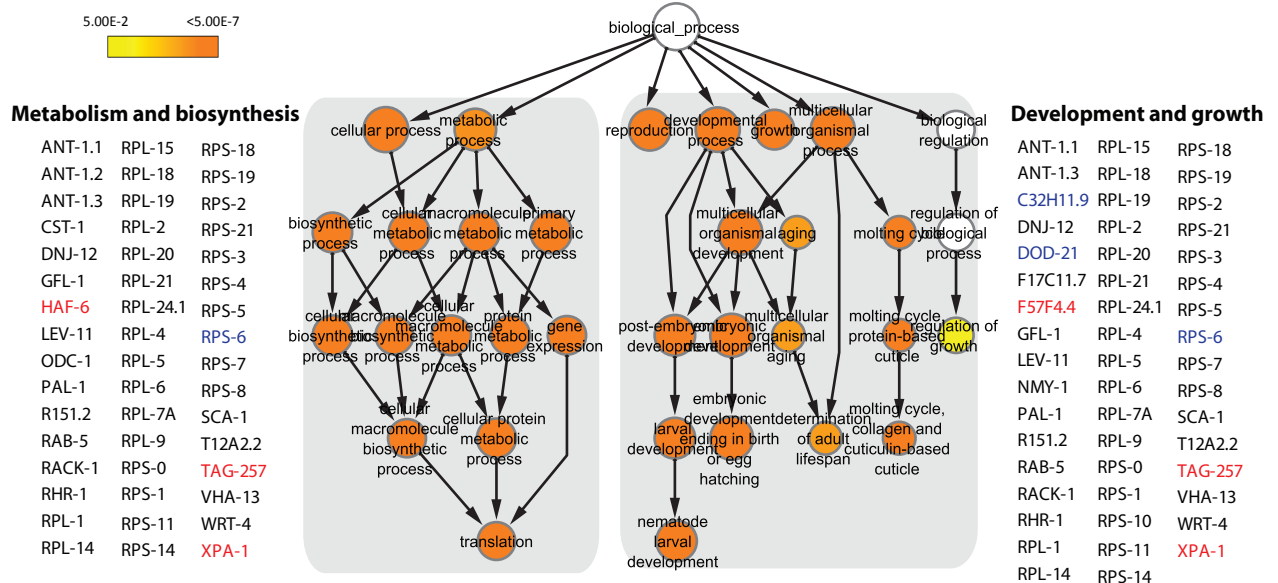

## Fig. S1 Proteomic vs. transcriptomic analysis.

Differential gene products from the proteomic (A) and transcriptomic (B) analysis with two gene distance obtained using the functional coupling browser FunCoup were loaded into Cytoscape and analyzed using the BiNGO plug-in for biological processes enrichment analysis. Up- and down-regulated genes are highlighted in blue and red, respectively; in black, non-differential genes and in gray, not identified genes. The nodes are colored yellow to orange, representing increasing statistical significance after Benjamini-Hochsberg correction (from  $p < 0.05$  to  $p < 7 \times 10^{-7}$ , respectively).

Fig. S2

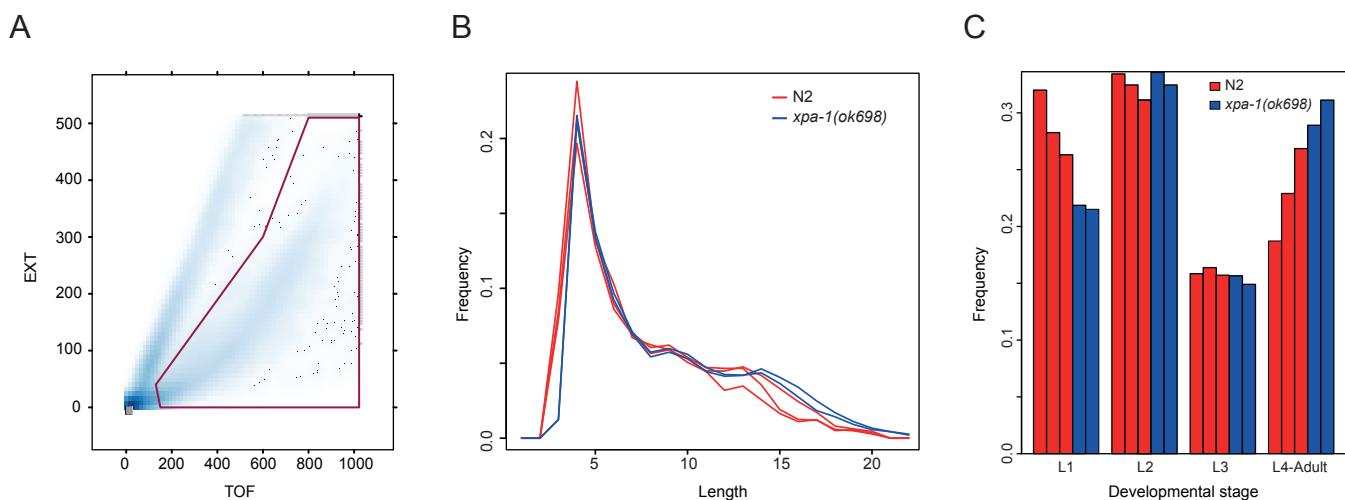

### Fig. S2 Distribution of developmental stages in mixed worm cultures.

Individual independent populations of wild type N2 and *xpa-1(ok698)* mutants were grown on plates, collected, and washed before measuring the larval length frequency on a COPAS Biosorter. (A) Plot showing extinction coefficient (EXT) as a function of time of flight (TOF) for one population corresponding to one plate. Gating (red ROI) was employed to exclude air bubbles and debris. (B) The size distribution for each individual population is shown as a function of length (units). The frequency of developmental stages in three independent N2 (red) and two independent *xpa-1(ok698)* (blue) populations are shown. One length unit corresponds to 50 units of TOF. The sorted populations were monitored under DIC to determine the developmental stage corresponding to length bin intervals; L1 (1-4), L2 (5-7), L3 (8-10), L4 + adults (11-). (C) The frequency of developmental stages in three independent N2 (red) and two independent *xpa-1(ok698)* (blue) populations were calculated based on B.

Fig S3

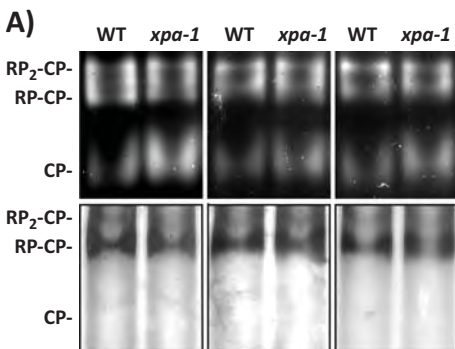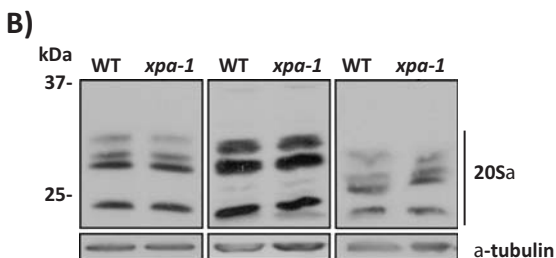

**Fig. S3 Proteasome activity and proteasome subunit levels are unchanged in *xpa-1(ok689)*.** (A) Proteasomal catalytic activity measured in an in-gel assay using suc-LLVY-AMC as a substrate. Gels from three separate lysates are presented. RP<sub>2</sub>-CP denotes the proteasome 20S core particle capped at both ends by the 19S lid; RP-CP denotes the proteasome 20S core particle capped at one end by the 19S lid; CP denotes the 20S core particle. (B) Three separate worm lysates run in a 10% SDS-PAGE and blotted against proteasome 20S α1,2,3,5,6&7 subunits or α-tubulin as a loading control. Note that the gel running time and exposure times of the film vary between the three independent experiments.

Fig S4

Wild type

control RNAi

*sti-1* RNAi

*spc-1* RNAi

*sma-1* RNAi

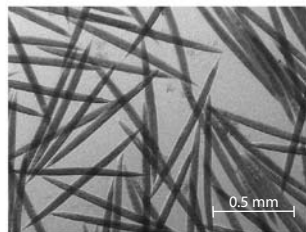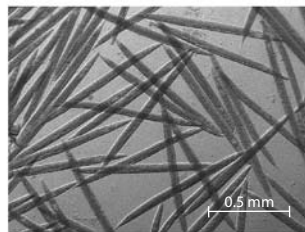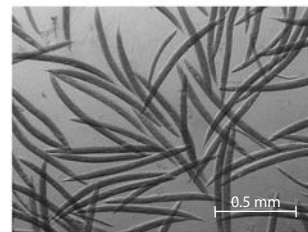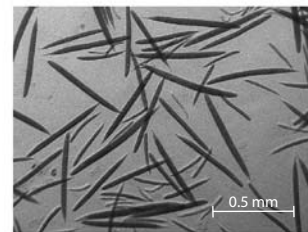

*xpa-1*

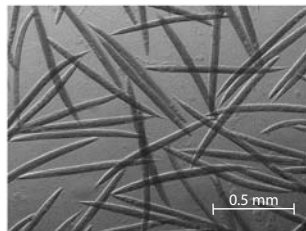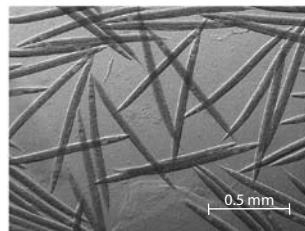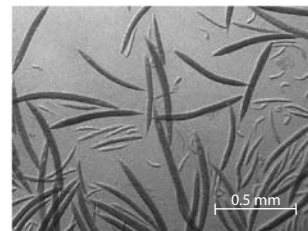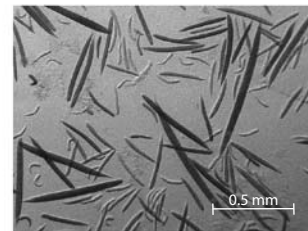

**Fig. S4 Depletion of SPC-1 and SMA-1 in the wild type and *xpa-1* worms gives non-synchronous populations with broad distribution of worm stages**

Micorscopic images of synchronized wild type (upper panels) and *xpa-1* (lower panels) worms fed with empty vector control (con), *sti-1*, *spc-1*, and *sma-1* RNAi taken when wild type worms on control food reached the L4/adult stage. Note that penetrance of *xpa-1* phenotype upon *spc-1* and *sma-1* RNAi is not complete and some worms are able to develop to adulthood.

Fig S5

A)

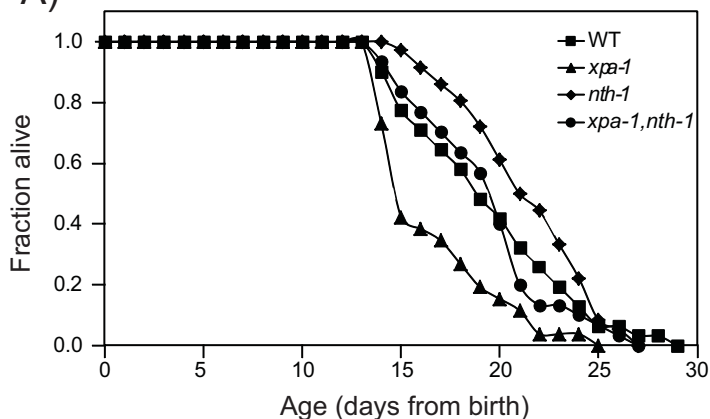

|                    | MEAN LS | SEM  | p value vs WT (log-rank test) | N of animals (censored) | N of trials |
|--------------------|---------|------|-------------------------------|-------------------------|-------------|
| WT                 | 19.11   | 0.74 |                               | 60 (29)                 | 1           |
| <i>xpa-1</i>       | 16.23   | 0.80 | 0.016                         | 60 (34)                 | 1           |
| <i>nth-1</i>       | 21.03   | 0.68 | 0.22                          | 60 (24)                 | 1           |
| <i>xpa-1;nth-1</i> | 19.00   | 0.63 | 0.70                          | 60 (30)                 | 1           |

B)

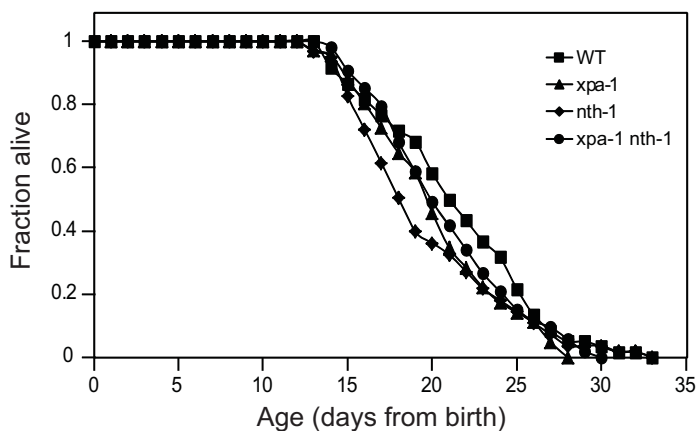

|                    | MEAN LS | SEM  | p value vs WT (log-rank test) | N of animals (censored) | N of trials |
|--------------------|---------|------|-------------------------------|-------------------------|-------------|
| WT                 | 20.15   | 0.27 |                               | 370(54)                 | 5           |
| <i>xpa-1</i>       | 19.57   | 0.23 | 0.000381                      | 370(63)                 | 5           |
| <i>nth-1</i>       | 19.57   | 0.44 | 0.394692                      | 140 (27)                | 2           |
| <i>xpa-1;nth-1</i> | 19.35   | 0.40 | 0.084419                      | 140 (30)                | 2           |

Fig. S5 Loss of NTH-1 restores normal lifespan of *xpa-1* mutants.

After hatching synchronous populations of wild type (squares) or single *xpa-1* (triangles), *nth-1* (diamonds) or double *xpa-1;nth-1* (circles) mutants were cultured in 20°C. 60-80 animals per strain were scored as dead or alive and transferred every day on fresh plates seeded with (A) *E. coli* OP50 or (B) HT115(DE3) during the fertile period, and then every other day or every 3 days until death. NTH-1 deficiency reverses lifespan suppression of *xpa-1* grown on OP50 (A). *xpa-1* is not short-lived when grown on HT115(DE3) (B) showing that the lifespan of *xpa-1* mutants is affected by food source. The mean life span (LS) and standard error of the mean (SEM) are shown below each survival curve. Statistical significance was calculated using the log-rank test from the cumulative survival curves from the indicated number (N) of independent experiments.

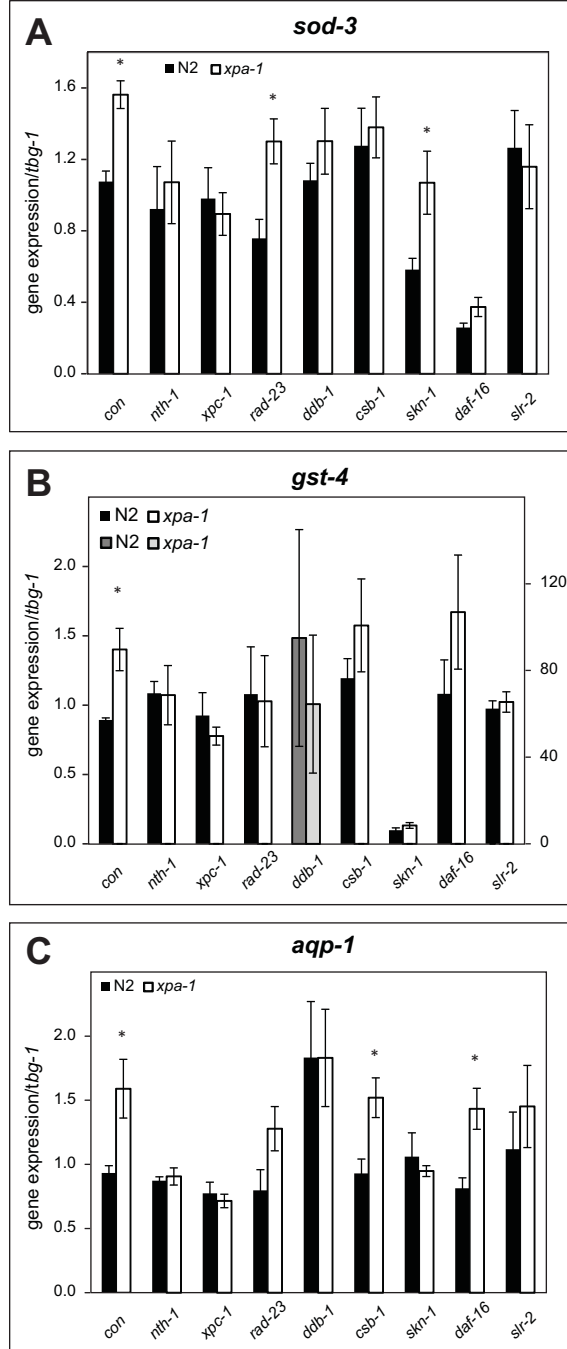

**Fig. S6 NTH-1 and XPC-1 are upstream factors required for transcriptome modulation in *xpa-1*.**

Transcript levels of *sod-3* (A), *gst-4* (B), and *aqp-1* (C) were measured by qRT-PCR in wild type or *xpa-1* worms fed with RNAi constructs targeting *nth-1*, *xpc-1*, *rad-23*, *ddb-1*, *csb-1*, *skn-1*, and *daf-16*. Transcript levels are presented as normalized to gamma tubulin (*tbg-1*). Note that in panel B *gst-4* expression upon *ddb-1* RNAi was highly upregulated and thus is presented on the right hand y axis. The results are presented as average  $\pm$  SEM from at least three independent replicates. \* $p < 0.05$ ; Student t-test.

**Table S1** Genes differentially regulated in *xpa-1(ok698)* compared to N2\*

| Probe set   | WormBase name                         | Common name      | Protein function/domain                                                                             | Fold change | p value |
|-------------|---------------------------------------|------------------|-----------------------------------------------------------------------------------------------------|-------------|---------|
| 188434_at   | K07G5.3                               | <i>mks-6</i>     | MecKel-Gruber Syndrome (MKS) homolog; C2 calcium-dependent membrane targeting domain                | 33.82       | 3.3E-05 |
| 176611_at   | T12A2.11                              | <i>srg-5</i>     | serpentine receptor, class G (gamma)                                                                | 14.72       | 1.3E-04 |
| 188046_s_at | F57F4.3                               | <i>gfi-1</i>     | contains 21 ET modules                                                                              | 12.82       | 5.4E-05 |
| 178799_at   | F14D7.7                               |                  | unknown                                                                                             | 2.41        | 3.9E-05 |
| 177660_at   | ZK596.1                               |                  | unknown                                                                                             | 2.31        | 1.3E-02 |
| 174636_at   |                                       |                  | non coding                                                                                          | 2.25        | 2.7E-03 |
| 177438_at   | F58D5.2                               |                  | unknown                                                                                             | 2.23        | 1.1E-03 |
| 184262_at   | Y53C10A.7                             | <i>fbxa-124</i>  | protein containing an F-box, a motif predicted to mediate protein-protein interactions              | 2.19        | 3.6E-05 |
| 184707_s_at | C32H11.10                             | <i>dod-21</i>    | downstream of DAF-16; CUB-like domain                                                               | 2.19        | 5.0E-02 |
| 177439_s_at | F58D5.2                               |                  | unknown                                                                                             | 2.13        | 1.0E-06 |
| 185387_s_at | Y53C10A.5<br>Y53C10A.22<br>Y53C10A.23 |                  | Kua-ubiquitin conjugating domain<br>ncRNA<br>ncRNA                                                  | 2.04        | 9.4E-05 |
| 184160_at   | C04F12.9                              | <i>rnh-13</i>    | RNase H                                                                                             | 1.95        | 3.4E-04 |
| 171775_x_at | ZK596.1                               |                  | unknown                                                                                             | 1.92        | 1.6E-02 |
| 179685_at   | T12G3.7                               |                  | unknown                                                                                             | 1.89        | 2.0E-06 |
| 186921_s_at | Y53C10A.13                            | <i>fbxa-122</i>  | protein containing an F-box, a motif predicted to mediate protein-protein interactions              | 1.85        | 1.4E-04 |
| 185319_at   | Y53C10A.6                             |                  | unknown                                                                                             | 1.80        | 2.4E-03 |
| 187838_s_at | Y53C10A.14                            | <i>fbxa-123</i>  | protein containing an F-box, a motif predicted to mediate protein-protein interactions              | 1.77        | 2.4E-03 |
| 182091_s_at | T04A11.1                              |                  | Phenazine biosynthesis PhzF protein domain                                                          | 1.64        | 1.1E-02 |
| 173688_s_at | T22B7.7                               |                  | unknown                                                                                             | 1.60        | 3.4E-03 |
| 186801_s_at | F45D11.15                             |                  | unknown                                                                                             | 1.57        | 3.1E-02 |
| 187178_s_at | D2024.7<br><i>21ur-14659</i>          | <i>gstk-2</i>    | one of two <i>C. elegans</i> kappa class glutathione transferases<br>21U-RNA                        | 1.55        | 6.1E-03 |
| 184191_at   | R09B5.9                               | <i>cnc-4</i>     | one of eleven <i>C. elegans</i> caenacin peptides                                                   | 1.54        | 2.4E-02 |
| 175537_at   |                                       |                  | non coding                                                                                          | 1.51        | 1.1E-02 |
| 188211_at   | Y47D3A.27                             | <i>teg-1</i>     | involved in regulating the stem cell proliferation versus differentiation decision in the germ line | 1.43        | 2.1E-02 |
| 187373_s_at | Y116F11B.10                           |                  | pseudogene                                                                                          | 1.39        | 2.3E-03 |
| 183108_at   | C12D5.9                               |                  | unknown                                                                                             | 1.38        | 5.0E-04 |
| 186528_s_at | F46E10.11                             | <i>hpo-26</i>    | Hypersensitive to POre-forming toxin                                                                | 1.37        | 3.4E-02 |
| 189975_at   | F08H9.5                               | <i>cllec-227</i> | C-type LECtin                                                                                       | 1.36        | 3.0E-02 |
| 174278_s_at | M04F3.3                               |                  | protein kinase domain, ATP binding site                                                             | 1.35        | 2.5E-02 |
| 190738_at   | ZK1290.5                              |                  | Aldo//keto reductase domain                                                                         | 1.35        | 4.7E-03 |
| 174184_at   | Y54G2A.10                             |                  | unknown                                                                                             | 1.33        | 2.2E-02 |
| 183155_at   | D2096.1                               |                  | mitochondrial inner membrane translocase subunit Tim17/Tim22/Tim23/peroxisomal protein PMP24 domain | 1.33        | 4.4E-03 |
| 191691_at   | C40H1.5                               | <i>ttr-5</i>     | TransThyretin-like domain                                                                           | 1.33        | 3.9E-02 |
| 192617_at   | C08A9.1<br>C08A9.3                    | <i>sod-3</i>     | iron/manganese superoxide dismutase; SID1 transmembrane family domain                               | 1.33        | 4.2E-02 |
| 192636_at   | F37H8.3                               |                  | HAD-superfamily hydrolase/Haloacid dehalogenase/epoxide hydrolase domain                            | 1.32        | 3.5E-02 |
| 176786_at   | F14H12.3                              |                  | Thrombospondin, type 1 repeat domain                                                                | 1.31        | 2.6E-02 |
| 182797_at   | Y11D7A.7<br>Y11D7A.21                 |                  | unknown<br>ncRNA                                                                                    | 1.30        | 4.4E-02 |
| 190682_at   | F10D2.2                               | <i>ugt-39</i>    | UDP-Glucuronosyl Transferase                                                                        | 1.29        | 4.1E-02 |
| 173304_at   | Y48B6A.6                              |                  | <i>C. elegans</i> ortholog of the mammalian EF hand domain-containing proteins EFHD1 and EFHD2      | 1.28        | 4.6E-02 |

| Probe set   | WormBase name                                                                                                                                                                                            | Common name    | Protein function/domain                                                                                                                                                                       | Fold change | p value |
|-------------|----------------------------------------------------------------------------------------------------------------------------------------------------------------------------------------------------------|----------------|-----------------------------------------------------------------------------------------------------------------------------------------------------------------------------------------------|-------------|---------|
| 179774_s_at | F35A5.8                                                                                                                                                                                                  | <i>erp-1</i>   | homologous to the human gene endophilin B1; BAR domain                                                                                                                                        | 1.28        | 4.2E-02 |
| 175311_s_at | F39E9.11                                                                                                                                                                                                 | <i>btb-17</i>  | BTB (Broad/complex/Tramtrack/Bric a brac) domain protein                                                                                                                                      | 1.27        | 9.6E-03 |
| 175908_at   | Y67D8A.3                                                                                                                                                                                                 | <i>dmd-9</i>   | DM (Doublesex/MAB-3) DNA-binding domain protein                                                                                                                                               | 1.27        | 9.8E-03 |
| 177235_s_at | DH11.2                                                                                                                                                                                                   |                | unknown                                                                                                                                                                                       | 1.27        | 6.1E-03 |
| 182930_at   | W03D2.1                                                                                                                                                                                                  | <i>pqn-75</i>  | predicted to contain a glutamine/asparagine (Q/N)-rich ('prion') domain                                                                                                                       | 1.27        | 3.0E-02 |
| 184370_at   | Y39D8A.1                                                                                                                                                                                                 |                | Ion channel regulatory protein                                                                                                                                                                | 1.27        | 9.6E-03 |
| 189534_at   | F55F3.2                                                                                                                                                                                                  |                | carboxylesterase, type B domain                                                                                                                                                               | 1.27        | 3.9E-02 |
| 173642_at   | Y22D7AR.6                                                                                                                                                                                                |                | inositol polyphosphate kinase                                                                                                                                                                 | 1.27        | 4.8E-02 |
| 184451_at   | Y57G7A.1                                                                                                                                                                                                 |                | unknown                                                                                                                                                                                       | 1.27        | 3.4E-03 |
| 184982_s_at | F56C11.3                                                                                                                                                                                                 |                | Erv1/Alr domain                                                                                                                                                                               | 1.27        | 1.2E-02 |
| 185449_s_at | T08B2.11                                                                                                                                                                                                 |                | unknown                                                                                                                                                                                       | 1.27        | 2.3E-02 |
| 185690_at   | C25E10.8                                                                                                                                                                                                 |                | putative secreted TIL-domain protease inhibitor paralogous to SWM-1, ISL-1, and the products of 11 other <i>C. elegans</i> genes                                                              | 1.27        | 3.8E-02 |
| 183311_at   | F40H3.1                                                                                                                                                                                                  |                | BTB/POZ domain                                                                                                                                                                                | 1.26        | 4.6E-03 |
| 185820_at   | F57B10.9                                                                                                                                                                                                 |                | orthologous to the human gene SPARTIN; Cysteine peptidase, histidine active site domain; Inheritance of peroxisomes protein 1                                                                 | 1.25        | 2.9E-02 |
| 186052_at   | <i>21ur-13401</i><br><i>21ur-5234</i><br><i>21ur-1736</i><br><i>21ur-3309</i><br><i>21ur-8001</i><br><i>21ur-9745</i><br><i>21ur-13091</i><br><i>21ur-10567</i><br><i>21ur-11755</i><br><i>21ur-4125</i> |                | 21U-RNA<br>21U-RNA<br>21U-RNA<br>21U-RNA<br>21U-RNA<br>21U-RNA<br>21U-RNA<br>21U-RNA<br>21U-RNA<br>21U-RNA<br>21U-RNA                                                                         | 1.25        | 2.1E-02 |
| 187875_s_at | C30A5.7                                                                                                                                                                                                  | <i>unc-86</i>  | transcription factor with a POU-type homeodomain that is required for correct fate determination and differentiation in diverse neuronal lineages                                             | 1.25        | 4.8E-02 |
| 193138_at   | F43G6.11                                                                                                                                                                                                 | <i>hda-5</i>   | Histone DeAcetylase                                                                                                                                                                           | 1.25        | 3.8E-02 |
| 171764_x_at | T27D12.2                                                                                                                                                                                                 | <i>clh-1</i>   | encodes two CLC-type chloride channels via alternative splicing                                                                                                                               | 1.24        | 6.9E-03 |
| 173107_at   |                                                                                                                                                                                                          |                | non coding                                                                                                                                                                                    | 1.24        | 1.3E-02 |
| 179590_at   | R11D1.3                                                                                                                                                                                                  |                | unknown                                                                                                                                                                                       | 1.24        | 2.7E-03 |
| 179913_at   | E04F6.9                                                                                                                                                                                                  |                | unknown                                                                                                                                                                                       | 1.24        | 4.5E-02 |
| 183178_at   | T22E5.1                                                                                                                                                                                                  |                | unknown                                                                                                                                                                                       | 1.24        | 3.7E-03 |
| 187053_at   | C07A9.9                                                                                                                                                                                                  |                | unknown                                                                                                                                                                                       | 1.24        | 3.4E-02 |
| 180913_at   | F32A5.5                                                                                                                                                                                                  | <i>aqp-1</i>   | encodes, by alternative splicing, two isoforms of an aquaglyceroporin                                                                                                                         | 1.23        | 3.0E-02 |
| 184714_s_at | Y53G8B.2                                                                                                                                                                                                 |                | diacylglycerol acyltransferase domain                                                                                                                                                         | 1.23        | 2.5E-02 |
| 188697_at   | T28C12.4                                                                                                                                                                                                 |                | protein with visible similarity to human neuroligin 4 (mutated in autism), but also belongs to a large family of carboxylesterases that happen to include NLG-1                               | 1.23        | 3.6E-02 |
| 189866_s_at | B0496.8                                                                                                                                                                                                  | <i>tes-1</i>   | ortholog of <i>Drosophila</i> CG6522-PA and of human LMCD1 and TESTIN; TES-1 is dispensable for Wnt-directed planar cell polarity and the fully asymmetrical division of B.a versus B.p cells | 1.23        | 3.1E-02 |
| 191651_at   | ZC518.1                                                                                                                                                                                                  | <i>best-22</i> | BESTrophin (chloride channel) homolog                                                                                                                                                         | 1.23        | 4.0E-02 |
| 174778_s_at | Y71A12B.12                                                                                                                                                                                               |                | unknown                                                                                                                                                                                       | 1.22        | 3.7E-02 |
| 177907_at   | C36E8.4                                                                                                                                                                                                  |                | Fps/Fes/Fer/CIP4 homology/Src homology-3 domain                                                                                                                                               | 1.22        | 1.3E-02 |

| Probe set   | WormBase name         | Common name                    | Protein function/domain                                                                                                                                                                                                       | Fold change | p value |
|-------------|-----------------------|--------------------------------|-------------------------------------------------------------------------------------------------------------------------------------------------------------------------------------------------------------------------------|-------------|---------|
|             | <i>21ur-12297</i>     |                                | 21U-RNA                                                                                                                                                                                                                       |             |         |
| 184600_s_at | C01B10.6              |                                | unknown                                                                                                                                                                                                                       | 1.22        | 3.5E-02 |
| 186043_at   | F20A1.10              |                                | unknown                                                                                                                                                                                                                       | 1.22        | 4.4E-04 |
| 190858_s_at | M01F1.5               | <i>hmit-1.3</i>                | one of three <i>C. elegans</i> proton (H <sup>+</sup> )-dependent myo-<br>inositol transporters                                                                                                                               | 1.22        | 1.2E-02 |
| 191443_at   | Y51A2D.10<br>Y51A2D.9 | <i>ttr-25</i><br><i>ttr-24</i> | TransThyretin-Related family domain<br>TransThyretin-Related family domain                                                                                                                                                    | 1.22        | 8.9E-03 |
| 191951_at   | T19H12.10             | <i>ugt-11</i>                  | UDP-Glucuronosyl Transferase                                                                                                                                                                                                  | 1.22        | 3.7E-02 |
| 172024_x_at | T27D12.2              | <i>clh-1</i>                   | encodes two CLC-type chloride channels via<br>alternative splicing                                                                                                                                                            | 1.21        | 1.5E-02 |
| 173190_s_at | K08A2.4               |                                | unknown                                                                                                                                                                                                                       | 1.21        | 3.7E-02 |
| 174067_at   | F33H1.4               |                                | Arv1 protein/Zinc finger domain                                                                                                                                                                                               | 1.21        | 1.7E-02 |
| 180943_at   | T19E7.1               | <i>cllec-178</i>               | C-type LECtin                                                                                                                                                                                                                 | 1.21        | 4.1E-02 |
| 192136_at   | T01G6.7               | <i>nhr-55</i>                  | Nuclear Hormone Receptor                                                                                                                                                                                                      | 1.21        | 2.0E-02 |
| 194159_s_at | Y51F10.7              |                                | unknown                                                                                                                                                                                                                       | 1.21        | 1.9E-02 |
| 171999_x_at | T27D12.2              | <i>clh-1</i>                   | encodes two CLC-type chloride channels via<br>alternative splicing                                                                                                                                                            | 1.21        | 7.4E-03 |
| 174246_at   | C17H11.2              |                                | unknown                                                                                                                                                                                                                       | 1.21        | 2.3E-02 |
| 177169_s_at | Y38C1AA.4             | <i>tcl-2</i>                   | T Cell Lineage defect                                                                                                                                                                                                         | 1.21        | 3.4E-02 |
| 188308_s_at | F44E2.3               |                                | unknown                                                                                                                                                                                                                       | 1.21        | 5.8E-03 |
| 189169_s_at | H24K24.5              | <i>fmo-5</i>                   | flavin-containing monooxygenase homologous to<br>human FMO1, FMO2, and FMO3                                                                                                                                                   | 1.21        | 2.6E-02 |
| 190865_s_at | C18D11.2              | <i>maa-1</i>                   | transmembrane acyl-CoA-binding protein required for<br>normal rates of endosomal recycling and for proper<br>endosomal shape and morphology                                                                                   | 1.21        | 2.8E-02 |
| 192294_s_at | C25D7.3               | <i>sdc-3</i>                   | protein that contains two mutationally separable<br>domains: a zinc finger motif required for dosage<br>compensation and a myosin- like putative ATP-<br>binding region required for her-1 regulation of sex<br>determination | 1.21        | 2.5E-02 |
| 172009_x_at | Y56A3A.18             |                                | ortholog of <i>S. cerevisiae</i> BUD20 that may suppress<br>tumorous growth in the germ line by ensuring robust<br>larval germline proliferation                                                                              | 1.20        | 3.3E-02 |
| 176615_at   | R13A5.5               | <i>ceh-13</i>                  | homolog of Hox genes of labial/Hox1 type; affects<br>viability, body shape and anterior patterning during<br>embryogenesis                                                                                                    | 1.20        | 1.2E-02 |
| 180627_at   | K04F1.9               |                                | unknown                                                                                                                                                                                                                       | 1.20        | 2.0E-02 |
| 181072_at   | C06E8.3               | <i>prk-1</i>                   | Pim (mammalian oncogene) Related Kinase                                                                                                                                                                                       | 1.20        | 4.9E-02 |
| 186150_s_at | R12C12.5              |                                | unknown                                                                                                                                                                                                                       | 1.20        | 3.2E-02 |
| 187357_at   | C09F5.2               | <i>orai-1</i>                  | ORAI (store-operated calcium channel) homolog                                                                                                                                                                                 | 1.20        | 1.2E-02 |
| 191123_s_at | R10E11.1<br>R10E11.13 | <i>cbp-1</i>                   | CBP/p300 homolog<br>ncRNA                                                                                                                                                                                                     | 1.20        | 4.8E-02 |
| 191797_at   | ZC449.2<br>ZC449.3    |                                | Apple-like/PAN-1 domain<br>Protein kinase, ATP binding site                                                                                                                                                                   | 1.20        | 2.3E-02 |
| 192819_at   | Y67A6A.2              | <i>nhr-62</i>                  | Nuclear Hormone Receptor                                                                                                                                                                                                      | 1.20        | 3.3E-02 |
| 171787_x_at | Y71H9A.3              | <i>sto-4</i>                   | STOMatin                                                                                                                                                                                                                      | 1.19        | 3.4E-02 |
| 178659_at   | R05D7.5               |                                | Cytosolic motility protein                                                                                                                                                                                                    | 1.19        | 3.0E-02 |
| 181210_at   | C26B9.1               |                                | unknown                                                                                                                                                                                                                       | 1.19        | 1.9E-03 |
| 181216_s_at | Y53H1B.2              |                                | unknown                                                                                                                                                                                                                       | 1.19        | 4.9E-02 |
| 181727_at   | B0041.3               |                                | Peptidoglycan-binding lysin domain                                                                                                                                                                                            | 1.19        | 4.6E-02 |
| 182961_at   | R02D3.8               |                                | Exonuclease                                                                                                                                                                                                                   | 1.19        | 4.9E-02 |
| 184466_s_at | T19B10.4              | <i>pqn-70</i>                  | glutamine/asparagine (Q/N)-rich ('prion') domain                                                                                                                                                                              | 1.19        | 3.5E-02 |
| 187662_at   | F32H5.3               |                                | unknown                                                                                                                                                                                                                       | 1.19        | 4.9E-02 |
| 189763_at   | C25D7.7               | <i>rap-2</i>                   | Ras-related GTPase that is most similar to the RAP2<br>members of the Ras GTPase superfamily                                                                                                                                  | 1.19        | 3.3E-02 |
| 193768_at   | C45E1.1               | <i>nhr-64</i>                  | Nuclear Hormone Receptor                                                                                                                                                                                                      | 1.19        | 1.8E-02 |

| Probe set   | WormBase name         | Common name                      | Protein function/domain                                                                                                                                | Fold change | p value |
|-------------|-----------------------|----------------------------------|--------------------------------------------------------------------------------------------------------------------------------------------------------|-------------|---------|
| 173010_at   | T05A12.4              |                                  | SNF2-related helicase                                                                                                                                  | 1.18        | 3.4E-02 |
| 173623_s_at | W10D5.3               | <i>gei-17</i>                    | SUMO E3 protein ligase                                                                                                                                 | 1.18        | 2.2E-02 |
| 174183_at   | F08D12.7              |                                  | unknown                                                                                                                                                | 1.18        | 4.9E-02 |
| 180684_s_at | F29C12.3              | <i>rict-1</i>                    | ortholog of mammalian Rictor, a component of the target of rapamycin complex 2 (TORC2)                                                                 | 1.18        | 3.2E-02 |
| 187191_at   | C04A2.1               | <i>tbc-1</i>                     | TBC (Tre-2/Bub2/Cdc16) domain family                                                                                                                   | 1.18        | 9.4E-03 |
| 188591_at   | T05A12.4              |                                  | SNF2-related helicase                                                                                                                                  | 1.18        | 1.1E-02 |
| 189101_at   | C04D8.1               | <i>pac-1</i>                     | RhoGAP (Rho guanosine triphosphatase (GTPase) activating protein)                                                                                      | 1.18        | 3.3E-02 |
| 190512_s_at | F22G12.4              |                                  | Ankyrin repeat-containing domain; BTB/POZ; Zinc finger, FYVE-type                                                                                      | 1.18        | 4.9E-02 |
| 192389_at   | F11A3.2               |                                  | Initiation factor 2B-related                                                                                                                           | 1.18        | 2.3E-02 |
| 175012_at   | F28H6.6               |                                  | unknown                                                                                                                                                | 1.17        | 2.2E-02 |
| 183594_at   | C29F9.1               |                                  | unknown                                                                                                                                                | 1.17        | 3.2E-02 |
| 186131_at   | K11G12.1              | <i>nas-11</i>                    | astacin-like metalloprotease                                                                                                                           | 1.17        | 4.9E-02 |
| 192914_at   | R06C7.3               | <i>dhp-1</i>                     | homolog of the human gene DPYS; Amidohydrolase 1 domain; Hydantoinase/dihydropyrimidinase domain                                                       | 1.17        | 1.7E-02 |
| 173165_s_at | B0412.3               |                                  | Trafficking protein particle complex subunit 11 domain, TRAPP II complex, TRAPPC10 domain                                                              | 1.16        | 4.7E-03 |
| 186755_s_at | T19H5.4               |                                  | unknown                                                                                                                                                | 1.16        | 6.2E-03 |
| 189755_at   | W01A11.1              |                                  | Alpha/beta hydrolase fold-1 domain; Epoxide hydrolase domain                                                                                           | 1.16        | 2.1E-04 |
| 192151_at   | F10G7.2               | <i>tsn-1</i>                     | ortholog of Tudor-SN (tudor staphylococcal nuclease) - component of the RNA-induced silencing complex (RISC)                                           | 1.16        | 2.7E-02 |
| 193100_s_at | R05F9.12<br>R05F9.13  | <i>aagr-2</i><br><i>msh-31</i>   | Acid Alpha Glucosidase Related<br>Major Sperm Protein                                                                                                  | 1.16        | 1.8E-03 |
| 174458_at   | T28F12.1              |                                  | unknown                                                                                                                                                | 1.16        | 1.6E-04 |
| 176895_s_at | C46H11.4              | <i>lfe-2</i>                     | inositol (1,4,5) triphosphate-3-kinase (IP3K)                                                                                                          | 1.16        | 2.2E-02 |
| 176939_at   | Y34D9A.11             | <i>spp-3</i>                     | SaPosin-like Protein family                                                                                                                            | 1.16        | 3.2E-02 |
| 181436_at   | F40A3.2               |                                  | EGF-like domain                                                                                                                                        | 1.16        | 1.4E-02 |
| 183408_at   | W01C8.5<br>W01C8.1    |                                  | DM13 domain<br>unknown                                                                                                                                 | 1.16        | 4.7E-02 |
| 183752_at   | T12A2.1               |                                  | Amidohydrolase 1 domain; Amidohydrolase 3 domain; Imidazolonepropionase domain                                                                         | 1.16        | 4.0E-02 |
| 184214_s_at | Y17G9B.8              |                                  | SGF29 tudor-like domain                                                                                                                                | 1.16        | 2.2E-02 |
| 191793_at   | K07C11.5              | <i>cri-2</i>                     | orthologous to the human gene similar to tissue inhibitor of metalloproteinase 3                                                                       | 1.16        | 5.0E-02 |
| 172713_x_at | F42F12.10<br>F42F12.6 | <i>nspc-12</i><br><i>nspc-13</i> | Nematode Specific Peptide family, group C                                                                                                              | 1.15        | 1.0E-02 |
| 175004_at   | T20B12.6              | <i>mml-1</i>                     | bHLH-ZIP protein orthologous to human MLX, MLXIP, and MLXIPL                                                                                           | 1.15        | 3.6E-03 |
| 188917_s_at | F26H11.2              | <i>nurf-1</i>                    | ortholog of Drosophila NURF301, a component of the NURF chromatin remodeling complex                                                                   | 1.15        | 3.0E-02 |
| 189653_s_at | R08E5.2               | <i>cysl-3</i>                    | CYsteine Synthase Like                                                                                                                                 | 1.15        | 4.7E-02 |
| 190688_s_at | K09H11.7              |                                  | 2-phosphoglycolate phosphatase domain, HAD-superfamily/Haloacid dehalogenase-like hydrolase domain                                                     | 1.15        | 2.2E-02 |
| 191783_at   | F53C11.3              |                                  | 2,3-dihydro-2,3-dihydroxybenzoate/Glucose/ribitol dehydrogenase domain; Polyketide synthase, KR domain; Short-chain dehydrogenase/reductase SDR domain | 1.15        | 6.0E-03 |
| 192435_at   | Y45F10A.4             | <i>seld-1</i>                    | SELD (SelD homolog) involved in selenophosphate synthesis                                                                                              | 1.15        | 4.3E-02 |
| 192670_at   | C05A2.1               | <i>pph-1</i>                     | Protein PHosphatase                                                                                                                                    | 1.15        | 2.1E-02 |
| 194091_s_at | Y76A2A.2              | <i>cua-1</i>                     | copper-transporting E1-E2 ATPase orthologous to the                                                                                                    | 1.15        | 2.3E-02 |

| Probe set   | WormBase name         | Common name                      | Protein function/domain                                                                                                                                                                   | Fold change | p value |
|-------------|-----------------------|----------------------------------|-------------------------------------------------------------------------------------------------------------------------------------------------------------------------------------------|-------------|---------|
|             |                       |                                  | human gene ATP7A                                                                                                                                                                          |             |         |
| 172357_x_at | F42F12.9<br>F42F12.1  | <i>nsp-10</i><br><i>nspc-9</i>   | Nematode Specific Peptide family, group C                                                                                                                                                 | 1.14        | 2.4E-02 |
| 172716_x_at | F42F12.9<br>F42F12.1  | <i>nsp-10</i><br><i>nspc-9</i>   | Nematode Specific Peptide family, group C                                                                                                                                                 | 1.14        | 3.7E-02 |
| 177152_at   | Y45G5AM.3             |                                  | unknown                                                                                                                                                                                   | 1.14        | 4.1E-02 |
| 179110_at   | C39E9.8               |                                  | unknown                                                                                                                                                                                   | 1.14        | 4.6E-02 |
| 182155_at   | F26F4.3               | <i>rom-1</i>                     | RhOMboid (Drosophila) related                                                                                                                                                             | 1.14        | 3.2E-02 |
| 182532_at   | H12D21.5<br>H12D21.7  | <i>mpst-3</i>                    | unknown<br>MercaptoPyruvate SulfurTransferase homolog                                                                                                                                     | 1.14        | 4.4E-02 |
| 182636_at   | K07B1.4               |                                  | Diacylglycerol acyltransferase domain                                                                                                                                                     | 1.14        | 3.8E-02 |
| 187925_at   | ZK6.7                 | <i>lip1-5</i>                    | LIPase Like                                                                                                                                                                               | 1.14        | 3.2E-02 |
| 190127_at   | F53G12.1              | <i>rab-11.1</i>                  | small GTPase homologous to the Rab GTPases that function in endocytosis, membrane fusion, and vesicular trafficking events                                                                | 1.14        | 1.7E-02 |
| 174814_at   | H06O01.2              | <i>chd-1</i>                     | large (1,461-aa) putative chromodomain helicase DNA-binding protein that inhibits DHC-1 in vivo                                                                                           | 1.13        | 2.9E-02 |
| 174994_at   | F11C7.5               | <i>osm-11</i>                    | protein required for normal osmosensation, osmotic resistance, and defecation rhythm, and for fully normal growth rate                                                                    | 1.13        | 4.2E-02 |
| 175963_at   | Y67D8A.2              |                                  | orthologous to human Phosphorylase kinase, beta subunit, (PHKB)                                                                                                                           | 1.13        | 1.6E-02 |
| 177838_at   | F37H8.5               |                                  | Gamma interferon inducible lysosomal thiol reductase GILT                                                                                                                                 | 1.13        | 3.0E-02 |
| 182662_at   | Y37H2A.1              |                                  | Deoxyribonuclease, TatD-related domain                                                                                                                                                    | 1.13        | 3.0E-02 |
| 189642_at   | B0238.10              |                                  | protein containing a C-terminal acetyltransferase domain that is a member of the the Gcn5-related N-acetyltransferases (GNAT) superfamily of proteins and the Mak3p subfamily of proteins | 1.13        | 1.8E-02 |
| 190349_at   | C44H4.5               | <i>tap-1</i>                     | ortholog of the vertebrate TAB1 (TGF-beta activated kinase 1/MAP3K7 binding protein 1) protein; Protein phosphatase 2C domain                                                             | 1.13        | 7.1E-03 |
| 190639_s_at | R07E5.10              | <i>pdc2-2</i>                    | homolog of mammalian programmed cell death 2 (PDCD2)                                                                                                                                      | 1.13        | 1.5E-02 |
| 173103_s_at | K07B1.4               |                                  | Diacylglycerol acyltransferase domain                                                                                                                                                     | 1.13        | 3.1E-02 |
| 175583_s_at | B0001.5               |                                  | unknown                                                                                                                                                                                   | 1.13        | 4.9E-02 |
| 178742_s_at | F57C2.5               |                                  | SMP-30/Gluconolactonase/LRE-like domain; Strictosidine synthase, conserved domain                                                                                                         | 1.13        | 3.0E-02 |
| 184750_at   | Y116A8C.10            |                                  | Small GTPase superfamily                                                                                                                                                                  | 1.13        | 4.6E-02 |
| 185516_s_at | F19B10.1              |                                  | unknown                                                                                                                                                                                   | 1.13        | 3.5E-02 |
| 188289_s_at | T24H7.5               | <i>tat-4</i>                     | Transbilayer Aminophospholipid Translocase (subfamily IV P-type ATPase)                                                                                                                   | 1.13        | 1.3E-02 |
| 188587_s_at | Y54G11A.13            | <i>ctl-3</i>                     | CaTaLase                                                                                                                                                                                  | 1.13        | 4.6E-02 |
| 192111_at   | C42C1.10              | <i>hpo-12</i>                    | Hypersensitive to PORE-forming toxin                                                                                                                                                      | 1.13        | 3.9E-02 |
| 193200_s_at | C47B2.6               | <i>gale-1</i>                    | putative UDP-galactose-4-epimerase                                                                                                                                                        | 1.13        | 3.1E-02 |
| 193926_at   | Y48A6B.7              |                                  | cytidine deaminase                                                                                                                                                                        | 1.13        | 2.9E-02 |
| 176634_s_at | R07B7.3               | <i>pqn-53</i>                    | contains a glutamine/asparagine (Q/N)-rich ('prion') domain                                                                                                                               | 1.12        | 2.2E-02 |
| 178092_at   | F43C1.7<br>F43C1.6    | <i>mrpl-21</i>                   | unknown<br>Mitochondrial Ribosomal Protein, Large                                                                                                                                         | 1.12        | 4.0E-02 |
| 182628_s_at | T21F4.1               |                                  | orthologous to the human gene Arginase Type I Erythroid Variant (ARG1)                                                                                                                    | 1.12        | 3.8E-02 |
| 172334_x_at | F42F12.10<br>F42F12.6 | <i>nspc-12</i><br><i>nspc-13</i> | Nematode Specific Peptide family, group C                                                                                                                                                 | 1.11        | 2.7E-02 |
| 177725_at   | C44H4.7               | <i>eor-2</i>                     | Egl-1 suppressor/DiO uptake defective/raf enhancer                                                                                                                                        | 1.11        | 4.2E-02 |
| 182604_at   | F40E3.2               | <i>mage-1</i>                    | Melanoma-Associated-antiGen homolog                                                                                                                                                       | 1.11        | 3.9E-02 |

| Probe set   | WormBase name                 | Common name     | Protein function/domain                                                                                                                                                                | Fold change | p value |
|-------------|-------------------------------|-----------------|----------------------------------------------------------------------------------------------------------------------------------------------------------------------------------------|-------------|---------|
| 184985_s at | Y74C9A.2                      | <i>nlp-40</i>   | Neuropeptide-Like Protein                                                                                                                                                              | 1.11        | 3.1E-02 |
| 186605_s at | Y17G7B.10                     |                 | Inorganic polyphosphate/ATP-NAD kinase domain                                                                                                                                          | 1.11        | 4.6E-02 |
| 193639_at   | F59F4.4                       | <i>acl-1</i>    | 1-acyl-sn-glycerol-3-phosphate acyltransferase                                                                                                                                         | 1.11        | 3.0E-02 |
| 178342_s at | T20D3.11                      |                 | unknown                                                                                                                                                                                | 1.10        | 2.6E-03 |
| 178615_s at | T12G3.2                       |                 | encodes a protein that may be involved in apoptosis                                                                                                                                    | 1.10        | 3.0E-03 |
| 188338_at   | F15D4.1                       | <i>btf-1</i>    | BTAF (TBP-associated factor) homolog                                                                                                                                                   | 1.10        | 2.2E-02 |
| 191944_at   | K01C8.7                       |                 | Mitochondrial carrier protein domain                                                                                                                                                   | 1.10        | 3.4E-02 |
| 175017_s_at | T24H7.5                       | <i>tat-4</i>    | Transbilayer Aminophospholipid Translocase (subfamily IV P-type ATPase)                                                                                                                | 1.09        | 7.5E-03 |
| 192744_at   | C34B7.2                       |                 | Synaptojanin domain, N-terminal                                                                                                                                                        | 1.09        | 4.1E-02 |
| 176227_s at | Y71H2AM.15                    |                 | unknown                                                                                                                                                                                | 1.09        | 4.2E-03 |
| 188660_s at | F28A12.4                      |                 | Peptidase A1/Aspartic peptidase domain                                                                                                                                                 | 1.09        | 4.6E-02 |
| 191695_at   | D2030.5                       | <i>mce-1</i>    | Methylmalonyl-CoA Epimerase                                                                                                                                                            | 1.09        | 4.5E-02 |
| 175400_s at | F28B3.6                       |                 | unknown                                                                                                                                                                                | 1.07        | 3.6E-02 |
| 189887_at   | C03D6.8                       | <i>rpl-24.2</i> | large ribosomal subunit L24 protein paralog                                                                                                                                            | 1.06        | 3.4E-02 |
| 193396_s at | R53.4                         |                 | Mitochondrial F1-F0 ATP synthase subunit F domain                                                                                                                                      | 1.06        | 3.4E-02 |
| 178431_s at | T20D3.3                       |                 | unknown                                                                                                                                                                                | 0.95        | 3.2E-02 |
| 174303_at   | C06H2.1                       | <i>atp-5</i>    | ATP synthase subunit                                                                                                                                                                   | 0.93        | 1.8E-02 |
| 174676_at   | C07G2.3                       | <i>cct-5</i>    | putative epsilon subunit of the eukaryotic cytosolic ('T complex') chaperonin, orthologous to human CCT5                                                                               | 0.93        | 4.6E-02 |
| 171915_at   | MTCE12                        |                 | mitochondrially encoded ATPase subunit 6                                                                                                                                               | 0.91        | 5.0E-02 |
| 180337_at   | Y54E5A.2                      |                 | unknown                                                                                                                                                                                | 0.91        | 3.6E-02 |
| 175088_at   | R07E5.3                       | <i>snfc-5</i>   | homolog of SNF5/Ini1, a component of the SWI/SNF complex                                                                                                                               | 0.90        | 5.0E-02 |
| 193053_at   | F54C9.10                      | <i>arl-1</i>    | ARF-Like; member of the GTP-binding ADP-ribosylation factor family                                                                                                                     | 0.90        | 1.9E-02 |
| 194193_x at | M01E5.4                       |                 | unknown                                                                                                                                                                                | 0.90        | 4.4E-02 |
| 188264_at   | F32D1.1                       | <i>figl-1</i>   | F1dGetin-Like (mammalian developmental AAA ATPase) related                                                                                                                             | 0.89        | 2.7E-02 |
| 188625_at   | C54G4.7<br>C54G4.6            | <i>dod-18</i>   | unknown<br>Downstream Of DAF-16; encodes a Maf-like protein required for normally short lifespan                                                                                       | 0.88        | 2.9E-02 |
| 173916_at   | F55D12.5                      |                 | EGF-like domain; TGF-beta receptor/activin receptor, type I/II domain                                                                                                                  | 0.88        | 2.6E-02 |
| 174590_s_at | C18F3.2                       | <i>sax-7</i>    | Sensory AXon guidance; ortholog of human L1CAM a member of the group of highly conserved transmembrane cell adhesion receptor molecules which belong to the immunoglobulin superfamily | 0.86        | 1.9E-02 |
| 187777_at   | B0025.8<br>B0025.5<br>B0025.2 | <i>csn-2</i>    | ncRNA<br>unknown<br>COP9 signalosome complex subunit 2                                                                                                                                 | 0.86        | 4.1E-02 |
| 173543_at   | C13F10.4                      |                 | unknown                                                                                                                                                                                | 0.86        | 6.1E-03 |
| 175697_at   | ZK652.11                      | <i>cuc-1</i>    | CU (copper) Chaperonin                                                                                                                                                                 | 0.86        | 4.3E-02 |
| 175106_at   | F44E2.9                       |                 | unknown                                                                                                                                                                                | 0.85        | 4.0E-02 |
| 192240_s_at | F57B9.3                       |                 | DNA/RNA helicase, ATP-dependent, DEAD/DEAH box type domain                                                                                                                             | 0.85        | 8.7E-04 |
| 173298_at   | MTCE21                        | <i>ctb-1</i>    | mitochondrially encoded cytochrome b protein of mitochondrial complex III                                                                                                              | 0.85        | 4.3E-03 |
| 174269_at   | F55C5.8                       |                 | unknown                                                                                                                                                                                | 0.85        | 1.8E-02 |
| 175637_at   | C07G1.3                       | <i>pct-1</i>    | PCTAIRE class cell cycle kinase                                                                                                                                                        | 0.85        | 2.1E-02 |
| 188360_at   | F55H2.6                       | <i>clu-1</i>    | yeast CLU (mitochondrial clustering) related                                                                                                                                           | 0.84        | 3.8E-02 |
| 173009_s at | F01G4.1                       | <i>swsn-4</i>   | SWI/SNF nucleosome remodeling complex component                                                                                                                                        | 0.84        | 1.7E-02 |
| 173566_at   | C13B9.3                       |                 | delta subunit of the coatomer (COPI) complex                                                                                                                                           | 0.84        | 4.9E-02 |
| 175729_at   | T12E12.4                      | <i>drp-1</i>    | Dynamin-Related Protein                                                                                                                                                                | 0.84        | 1.0E-02 |
| 180150_at   | F54E2.1                       |                 | unknown                                                                                                                                                                                | 0.83        | 2.5E-02 |
| 190591_at   | F32G8.6                       | <i>cat-4</i>    | abnormal CATecholamine distribution; ortholog of the                                                                                                                                   | 0.83        | 3.4E-02 |

| Probe set   | WormBase name       | Common name    | Protein function/domain                                                                                                                                                                | Fold change | p value |
|-------------|---------------------|----------------|----------------------------------------------------------------------------------------------------------------------------------------------------------------------------------------|-------------|---------|
|             |                     |                | human GTP cyclohydrolase I gene                                                                                                                                                        |             |         |
| 193223_at   | F21C3.1             | <i>twk-1</i>   | TWiK family of potassium channels                                                                                                                                                      | 0.83        | 1.1E-02 |
| 173977_at   | Y106G6H.12          | <i>duo-3</i>   | Deubiquitylating with USP/UBP and OTU domains                                                                                                                                          | 0.82        | 2.3E-04 |
| 174057_s_at | W08A12.1            | <i>unc-132</i> | UNCoordinated                                                                                                                                                                          | 0.81        | 3.5E-02 |
| 181995_at   | F40G9.5             |                | unknown                                                                                                                                                                                | 0.81        | 1.1E-02 |
| 174010_at   | F19B6.1             |                | Chloramphenicol phosphotransferase-like domain; Phosphoribulokinase/uridine kinase domain                                                                                              | 0.80        | 9.0E-03 |
| 174589_at   | C18F3.2             | <i>sax-7</i>   | Sensory AXon guidance; ortholog of human L1CAM a member of the group of highly conserved transmembrane cell adhesion receptor molecules which belong to the immunoglobulin superfamily | 0.80        | 1.5E-02 |
| 171973_at   | T01G1.3             | <i>sec-31</i>  | yeast SEC homolog                                                                                                                                                                      | 0.79        | 1.7E-03 |
| 190942_at   | T26C11.6            | <i>ceh-21</i>  | C. Elegans Homeobox; ONECUT class CUT homeobox protein with a single N-terminal cut domain and an OCAM domain                                                                          | 0.78        | 2.8E-02 |
| 193619_at   | F45G2.6             | <i>trf-1</i>   | TNF Receptor Associated Factor (TRAF) homolog                                                                                                                                          | 0.76        | 3.3E-02 |
| 181947_s_at | C03H5.1             | <i>clec-10</i> | C-type LECTin                                                                                                                                                                          | 0.75        | 4.8E-02 |
| 188947_at   | T09F5.9             | <i>clec-47</i> | C-type LECTin                                                                                                                                                                          | 0.75        | 2.6E-02 |
| 175602_at   | D2045.6             | <i>cul-1</i>   | CULlin                                                                                                                                                                                 | 0.75        | 3.9E-02 |
| 181946_at   | C03H5.1             | <i>clec-10</i> | C-type LECTin                                                                                                                                                                          | 0.75        | 2.5E-02 |
| 184947_s_at | ZC84.3              | <i>cls-3</i>   | CLASP family of microtubule-binding protein                                                                                                                                            | 0.74        | 3.4E-03 |
| 183085_at   | W05H7.4             | <i>zfp-3</i>   | Zinc Finger Protein                                                                                                                                                                    | 0.74        | 4.6E-03 |
| 183848_at   | F49E12.2            | <i>dod-23</i>  | Downstream Of DAF-16                                                                                                                                                                   | 0.73        | 4.2E-02 |
| 171950_x_at | T12G3.7             |                | unknown                                                                                                                                                                                | 0.72        | 2.6E-02 |
| 174677_s_at | C23F12.1            | <i>fln-2</i>   | FiLamiN (actin binding protein) homolog                                                                                                                                                | 0.72        | 3.2E-02 |
| 178465_at   | C08B6.11<br>C08B6.3 |                | unknown<br>unknown                                                                                                                                                                     | 0.72        | 3.9E-02 |
| 179782_s_at | W01F3.1             |                | unknown                                                                                                                                                                                | 0.71        | 1.0E-02 |
| 184704_at   | F08D12.2            |                | CC domain                                                                                                                                                                              | 0.70        | 1.8E-02 |
| 190744_at   | C04F5.7             | <i>ugt-63</i>  | UDP-GlucuronosylTransferase                                                                                                                                                            | 0.69        | 1.8E-02 |
| 190693_at   | K08B4.3             | <i>ugt-19</i>  | UDP-GlucuronosylTransferase                                                                                                                                                            | 0.68        | 2.8E-02 |
| 193246_s_at | C23F12.1            | <i>fln-2</i>   | FiLamiN (actin binding protein) homolog                                                                                                                                                | 0.67        | 1.1E-02 |
| 176414_s_at | C30F12.2            |                | ATPase domain, AFG1-like                                                                                                                                                               | 0.66        | 3.7E-03 |
| 179098_at   | T19C9.8             |                | unknown                                                                                                                                                                                | 0.59        | 1.2E-03 |
| 177899_at   | T03D8.7             |                | unknown                                                                                                                                                                                | 0.58        | 1.4E-03 |
| 192321_s_at | F46G11.3            | <i>tag-257</i> | Temporarily Assigned Gene name; Serine-threonine/tyrosine-protein kinase catalytic domain                                                                                              | 0.49        | 5.1E-05 |
| 173341_at   | Y48G8AL.11          | <i>haf-6</i>   | HAIF t ATP-binding cassette (ABC) transporter (PGP related)                                                                                                                            | 0.33        | 2.0E-06 |
| 174109_at   | Y102A5C.6           |                | pseudogene                                                                                                                                                                             | 0.06        | 7.0E-06 |
| 192720_at   | K07G5.2             | <i>xpa-1</i>   | human XPA (Xeroderma pigmentosum complementation group A) related                                                                                                                      | 0.02        | 1.7E-05 |
| 182088_s_at | F57F4.4             |                | ET repeat domain                                                                                                                                                                       | 0.003       | 9.6E-15 |

\* Significantly regulated genes (p>0.05) are shown. The unprocessed and processed microarray data can be obtained at NCBI Gene Expression Omnibus (<http://www.ncbi.nlm.nih.gov/geo/>) (ref no GSE39252).

Supplementary Table S2 Proteins identified in proteomic analysis

| Replicate | Protein Groups                      | Peptide |                     |                     | Normalized | Significance | BH           |             | Ratio |
|-----------|-------------------------------------|---------|---------------------|---------------------|------------|--------------|--------------|-------------|-------|
|           |                                     | Score   | Peptides Identified | Peptides Quantified |            |              | Significance | Variability |       |
| 22        | B0035.3                             | 90      | 4                   | 2                   | 5729       | 0.76         | 0.16         | 0.50        | 15    |
| 10        | B0035.5                             | 20      | 4                   | 4                   | 14331      | 0.72         | 0.17         | 0.49        | 29    |
| 22        | B0035.5                             | 15      | 5                   | 1                   | 10863      | 0.58         | 0.02         | 0.23        | 6     |
| 22        | B0041.4                             | 29      | 12                  | 3                   | 171103     | 1.26         | 0.29         | 0.54        | 20    |
| 22        | B0205.3                             | 210     | 12                  | 7                   | 52908      | 0.55         | 0.02         | 0.17        | 43    |
| 10        | B0205.3                             | 36      | 4                   | 2                   | 4970       | 3.23         | 0.01         | 0.09        | 13    |
| 10        | B0222.9                             | 22      | 7                   | 2                   | 11797      | 1.06         | 0.48         | 0.50        | 11    |
| 22        | B0222.9                             | 50      | 8                   | 2                   | 18197      | 3.31         | 0.00         | 0.03        | 9     |
| 1         | B0228.4c;B0228.4e;B0228.4a;B0228.4d | 81      | 25                  | 1                   | 201242     | 0.53         | 0.05         | 0.33        | 4     |
| 10        | B0228.7                             | 110     | 4                   | 1                   | 4403       | 0.77         | 0.21         | 0.50        | 5     |
| 22        | B0250.1                             | 61      | 9                   | 4                   | 25709      | 1.43         | 0.19         | 0.52        | 24    |
| 1         | B0250.5                             | 268     | 16                  | 14                  | 41110      | 0.98         | 0.46         | 0.50        | 125   |
| 10        | B0250.5                             | 257     | 19                  | 13                  | 90661      | 0.99         | 0.45         | 0.51        | 116   |
| 22        | B0250.5                             | 340     | 22                  | 13                  | 132406     | 1.25         | 0.29         | 0.54        | 111   |
| 7         | B0250.5                             | 93      | 16                  | 5                   | 95256      | 1.06         | 0.45         | 0.51        | 40    |
| 22        | B0261.1                             | 12      | 4                   | 1                   | 31909      | 2.09         | 0.03         | 0.26        | 4     |
| 10        | B0272.1                             | 2691    | 63                  | 3                   | 160838     | 0.78         | 0.23         | 0.50        | 24    |
| 22        | B0272.1                             | 1841    | 47                  | 1                   | 113771     | 1.00         | 0.48         | 0.51        | 8     |
| 10        | B0272.3                             | 175     | 9                   | 7                   | 47205      | 0.71         | 0.16         | 0.50        | 73    |
| 22        | B0272.3                             | 129     | 7                   | 6                   | 35370      | 1.40         | 0.20         | 0.53        | 55    |
| 1         | B0272.3                             | 61      | 5                   | 5                   | 6968       | 1.44         | 0.17         | 0.49        | 37    |
| 7         | B0272.3                             | 60      | 4                   | 2                   | 15354      | 1.44         | 0.19         | 0.51        | 19    |
| 7         | B0280.3                             | 275     | 9                   | 8                   | 18549      | 1.07         | 0.44         | 0.51        | 82    |
| 10        | B0280.3                             | 148     | 5                   | 3                   | 13779      | 1.24         | 0.34         | 0.51        | 37    |
| 22        | B0280.3                             | 141     | 4                   | 2                   | 8794       | 1.00         | 0.50         | 0.50        | 21    |
| 1         | B0280.3                             | 147     | 5                   | 2                   | 8924       | 0.69         | 0.16         | 0.50        | 14    |
| 10        | B0286.3                             | 187     | 11                  | 7                   | 28692      | 0.67         | 0.11         | 0.48        | 58    |
| 22        | B0286.3                             | 78      | 9                   | 5                   | 15006      | 1.02         | 0.48         | 0.51        | 26    |
| 7         | B0286.3                             | 78      | 5                   | 1                   | 12234      | 0.76         | 0.22         | 0.55        | 5     |
| 1         | B0286.3                             | 182     | 6                   | 1                   | 7074       | 0.88         | 0.36         | 0.51        | 6     |
| 22        | B0334.3a;B0334.3b                   | 172     | 11                  | 3                   | 105262     | 0.84         | 0.26         | 0.55        | 20    |

|                      |      |    |    |        |      |      |      |      |     |
|----------------------|------|----|----|--------|------|------|------|------|-----|
| 10 B0334.3b;B0334.3a | 103  | 6  | 1  | 47948  | 0.30 | 0.00 | 0.01 | 0.50 | 4   |
| 22 B0365.1           | 712  | 37 | 23 | 96983  | 1.08 | 0.43 | 0.53 | 0.19 | 187 |
| 1 B0365.1            | 681  | 28 | 15 | 63787  | 1.13 | 0.38 | 0.52 | 0.16 | 123 |
| 10 B0365.1           | 1096 | 46 | 7  | 150055 | 2.98 | 0.01 | 0.13 | 0.22 | 50  |
| 7 B0365.1            | 1097 | 44 | 2  | 130327 | 1.27 | 0.28 | 0.55 | 0.13 | 14  |
| 22 B0365.6           | 93   | 2  | 1  | 5050   | 1.00 | 0.48 | 0.51 | 0.11 | 12  |
| 7 B0365.7            | 67   | 16 | 1  | 36095  | 0.77 | 0.24 | 0.55 | 0.11 | 4   |
| 22 B0393.1           | 1001 | 43 | 34 | 395282 | 1.02 | 0.49 | 0.51 | 0.16 | 347 |
| 10 B0393.1           | 614  | 26 | 15 | 425416 | 0.98 | 0.44 | 0.52 | 0.19 | 152 |
| 7 B0393.1            | 280  | 16 | 13 | 151368 | 1.35 | 0.24 | 0.56 | 0.18 | 103 |
| 1 B0393.1            | 322  | 14 | 7  | 39507  | 0.64 | 0.12 | 0.50 | 0.12 | 64  |
| 10 B0395.3           | 65   | 2  | 1  | 5653   | 2.66 | 0.02 | 0.20 | 0.11 | 6   |
| 22 B0403.4           | 60   | 11 | 9  | 36550  | 1.02 | 0.49 | 0.51 | 0.14 | 54  |
| 10 B0403.4           | 179  | 16 | 6  | 67538  | 1.10 | 0.45 | 0.51 | 0.14 | 38  |
| 7 B0403.4            | 45   | 8  | 3  | 10536  | 1.01 | 0.50 | 0.50 | 0.12 | 12  |
| 1 B0403.4            | 35   | 7  | 1  | 26085  | 1.33 | 0.23 | 0.50 | 0.19 | 5   |
| 10 B0432.2           | 180  | 7  | 6  | 38693  | 0.91 | 0.36 | 0.51 | 0.21 | 48  |
| 1 B0432.2            | 31   | 2  | 2  | 872    | 1.19 | 0.33 | 0.51 | 0.15 | 9   |
| 22 B0432.2           | 70   | 3  | 1  | 21657  | 2.44 | 0.01 | 0.16 | 0.12 | 5   |
| 1 B0464.1            | 78   | 4  | 2  | 1718   | 0.61 | 0.10 | 0.46 | 0.18 | 16  |
| 10 B0464.1           | 31   | 3  | 1  | 2324   | 0.75 | 0.20 | 0.48 | 0.20 | 8   |
| 22 C01B10.11         | 64   | 4  | 1  | 4999   | 1.30 | 0.26 | 0.55 | 0.22 | 5   |
| 10 C01F1.3a          | 14   | 2  | 2  | 5610   | 0.89 | 0.34 | 0.51 | 0.22 | 10  |
| 22 C01F1.3a;C01F1.3b | 34   | 2  | 2  | 4071   | 1.30 | 0.26 | 0.55 | 0.19 | 11  |
| 1 C01F1.3a;C01F1.3b  | 24   | 3  | 1  | 3498   | 0.97 | 0.45 | 0.50 | 0.27 | 6   |
| 1 C01G5.4            | 15   | 5  | 1  | 8290   | 0.65 | 0.13 | 0.50 | 0.73 | 4   |
| 7 C01G5.5            | 26   | 2  | 1  | 1863   | 1.33 | 0.24 | 0.54 | 0.16 | 5   |
| 10 C01G6.6a          | 51   | 4  | 1  | 13421  | 1.32 | 0.29 | 0.51 | 0.19 | 6   |
| 22 C01G6.6a;C01G6.6b | 48   | 5  | 3  | 9678   | 1.08 | 0.43 | 0.52 | 0.20 | 23  |
| 10 C01G8.5a;C01G8.5b | 13   | 5  | 1  | 13223  | 0.17 | 0.00 | 0.00 | 0.27 | 5   |
| 1 C01G8.5a;C01G8.5b  | 21   | 6  | 1  | 7758   | 1.64 | 0.10 | 0.46 | 0.19 | 4   |
| 10 C02B10.1          | 175  | 10 | 8  | 90468  | 0.74 | 0.18 | 0.50 | 0.14 | 73  |
| 22 C02B10.1          | 102  | 8  | 2  | 122076 | 0.86 | 0.29 | 0.53 | 0.14 | 13  |
| 7 C02D5.4            | 169  | 8  | 6  | 32799  | 0.72 | 0.18 | 0.52 | 0.19 | 54  |

|                          |      |     |     |         |      |      |      |      |      |
|--------------------------|------|-----|-----|---------|------|------|------|------|------|
| 1 C02D5.4                | 104  | 7   | 4   | 7938    | 1.04 | 0.47 | 0.50 | 0.17 | 22   |
| 7 C02F5.9                | 191  | 7   | 6   | 57634   | 1.70 | 0.10 | 0.45 | 0.30 | 34   |
| 10 C02F5.9               | 427  | 12  | 6   | 116470  | 0.78 | 0.22 | 0.50 | 0.28 | 45   |
| 22 C02F5.9               | 202  | 5   | 4   | 100602  | 1.01 | 0.49 | 0.50 | 0.28 | 23   |
| 1 C02F5.9                | 123  | 7   | 3   | 33534   | 0.65 | 0.13 | 0.49 | 0.16 | 19   |
| 1 C03G5.1                | 82   | 10  | 2   | 15051   | 1.31 | 0.24 | 0.50 | 0.09 | 17   |
| 7 C03G5.1                | 127  | 9   | 2   | 23043   | 0.70 | 0.16 | 0.49 | 0.19 | 16   |
| 10 C04F6.1               | 9169 | 492 | 423 | 2492580 | 1.02 | 0.48 | 0.51 | 0.18 | 3258 |
| 22 C04F6.1               | 6994 | 437 | 380 | 1891610 | 0.78 | 0.18 | 0.51 | 0.19 | 2780 |
| 1 C04F6.1                | 2330 | 184 | 129 | 349126  | 0.99 | 0.47 | 0.50 | 0.20 | 871  |
| 7 C04F6.1                | 1429 | 125 | 88  | 296966  | 1.51 | 0.15 | 0.49 | 0.22 | 583  |
| 22 C04F6.4a;C04F6.4b     | 36   | 2   | 2   | 4251    | 1.57 | 0.13 | 0.49 | 0.15 | 16   |
| 1 C04F6.4a;C04F6.4b      | 25   | 2   | 1   | 4541    | 1.89 | 0.04 | 0.31 | 0.33 | 5    |
| 22 C05C10.3              | 72   | 5   | 3   | 12823   | 1.09 | 0.42 | 0.53 | 0.10 | 25   |
| 1 C05C10.3               | 35   | 3   | 2   | 7026    | 0.78 | 0.25 | 0.50 | 0.13 | 16   |
| 10 C05C10.3              | 70   | 5   | 2   | 12544   | 0.82 | 0.26 | 0.51 | 0.15 | 14   |
| 7 C05C10.3               | 24   | 4   | 1   | 8192    | 1.09 | 0.42 | 0.51 | 0.31 | 8    |
| 10 C05C8.3               | 38   | 3   | 2   | 4506    | 0.59 | 0.06 | 0.38 | 0.13 | 15   |
| 22 C05C8.3               | 67   | 3   | 2   | 5743    | 0.69 | 0.09 | 0.40 | 0.22 | 18   |
| 10 C05C8.4               | 21   | 8   | 1   | 73033   | 3.09 | 0.01 | 0.11 | 0.19 | 6    |
| 22 C05D11.11a            | 1164 | 45  | 39  | 203940  | 0.82 | 0.23 | 0.54 | 0.17 | 360  |
| 10 C05D11.11a;C05D11.11b | 1210 | 54  | 43  | 300900  | 0.86 | 0.30 | 0.51 | 0.22 | 384  |
| 1 C05D11.11a;C05D11.11b  | 1119 | 45  | 39  | 136642  | 0.98 | 0.46 | 0.50 | 0.16 | 359  |
| 7 C05D11.11a;C05D11.11b  | 967  | 36  | 30  | 140618  | 0.61 | 0.09 | 0.45 | 0.15 | 295  |
| 22 C05E4.9a;C05E4.9b     | 459  | 22  | 18  | 118493  | 1.26 | 0.29 | 0.54 | 0.15 | 145  |
| 7 C05E4.9a;C05E4.9b      | 136  | 19  | 9   | 39577   | 0.61 | 0.09 | 0.45 | 0.21 | 56   |
| 10 C05E4.9a;C05E4.9b     | 189  | 8   | 4   | 25060   | 0.80 | 0.24 | 0.50 | 0.16 | 34   |
| 1 C05E4.9a;C05E4.9b      | 127  | 29  | 1   | 29304   | 1.38 | 0.20 | 0.50 | 0.17 | 5    |
| 10 C05G5.4               | 751  | 28  | 20  | 127500  | 1.09 | 0.45 | 0.51 | 0.15 | 191  |
| 22 C05G5.4               | 681  | 22  | 18  | 96530   | 0.84 | 0.26 | 0.55 | 0.15 | 186  |
| 7 C05G5.4                | 278  | 13  | 12  | 54735   | 0.83 | 0.30 | 0.55 | 0.16 | 107  |
| 1 C05G5.4                | 220  | 18  | 8   | 23135   | 1.28 | 0.27 | 0.49 | 0.18 | 71   |
| 10 C06A1.1               | 662  | 59  | 48  | 244356  | 0.80 | 0.24 | 0.50 | 0.17 | 418  |
| 22 C06A1.1               | 941  | 65  | 38  | 316792  | 0.73 | 0.13 | 0.49 | 0.17 | 355  |

|                                       |      |     |     |         |      |      |      |      |      |
|---------------------------------------|------|-----|-----|---------|------|------|------|------|------|
| 7 C06A1.1                             | 331  | 37  | 21  | 133426  | 0.85 | 0.33 | 0.54 | 0.18 | 184  |
| 1 C06A1.1                             | 238  | 33  | 8   | 101004  | 0.97 | 0.45 | 0.50 | 0.17 | 46   |
| 22 C06A6.4a;C06A6.4b                  | 219  | 12  | 9   | 47108   | 0.81 | 0.22 | 0.54 | 0.22 | 79   |
| 7 C06A6.4a;C06A6.4b                   | 82   | 8   | 7   | 17604   | 0.51 | 0.03 | 0.29 | 0.19 | 56   |
| 1 C06A6.4a;C06A6.4b                   | 110  | 13  | 1   | 12748   | 6.69 | 0.00 | 0.00 | 0.15 | 4    |
| 7 C06A6.5                             | 34   | 3   | 2   | 5681    | 0.69 | 0.15 | 0.50 | 0.29 | 11   |
| 10 C06E7.1a;C06E7.1b                  | 395  | 9   | 1   | 36203   | 0.45 | 0.01 | 0.15 | 0.11 | 4    |
| 7 C06E7.1a;T13A10.11a;C06E7.1c        | 632  | 15  | 1   | 40161   | 0.29 | 0.00 | 0.01 | 0.23 | 4    |
| 22 C06E7.3a                           | 548  | 16  | 2   | 163318  | 0.56 | 0.02 | 0.21 | 0.33 | 12   |
| 22 C06G3.10                           | 10   | 3   | 1   | 5053    | 1.11 | 0.40 | 0.54 | 0.04 | 5    |
| 10 C06G3.5a;C06G3.5b                  | 47   | 5   | 4   | 40623   | 1.54 | 0.19 | 0.48 | 0.12 | 44   |
| 7 C06G3.5a;C06G3.5b                   | 68   | 3   | 2   | 14197   | 1.27 | 0.28 | 0.56 | 0.16 | 17   |
| 22 C06G3.5b                           | 84   | 4   | 3   | 31131   | 0.91 | 0.36 | 0.55 | 0.08 | 27   |
| 22 C06G4.2a;C06G4.2b;C06G4.2d         | 191  | 7   | 7   | 6232    | 1.11 | 0.40 | 0.54 | 0.17 | 58   |
| 1 C06G4.2a;C06G4.2b;C06G4.2d;C06G4.2c | 52   | 2   | 1   | 747     | 1.05 | 0.46 | 0.50 | 0.06 | 5    |
| 10 C06G4.2a;C06G4.2d;C06G4.2b         | 173  | 8   | 5   | 8593    | 1.70 | 0.14 | 0.50 | 0.15 | 49   |
| 10 C06H2.1                            | 276  | 11  | 11  | 70839   | 1.17 | 0.39 | 0.52 | 0.15 | 97   |
| 22 C06H2.1                            | 200  | 13  | 9   | 66630   | 2.41 | 0.01 | 0.17 | 0.15 | 83   |
| 1 C06H2.1                             | 96   | 6   | 3   | 31225   | 0.47 | 0.02 | 0.27 | 0.19 | 28   |
| 7 C06H2.1                             | 17   | 2   | 1   | 9915    | 1.09 | 0.42 | 0.51 | 0.21 | 5    |
| 7 C07A12.4a;C07A12.4b                 | 2774 | 196 | 143 | 1945690 | 0.81 | 0.28 | 0.56 | 0.18 | 1096 |
| 22 C07A12.4a;C07A12.4b                | 2724 | 151 | 132 | 2422820 | 1.09 | 0.42 | 0.53 | 0.15 | 1140 |
| 10 C07A12.4a;C07A12.4b                | 2414 | 115 | 87  | 1959500 | 1.36 | 0.27 | 0.50 | 0.14 | 805  |
| 1 C07A12.4a;C07A12.4b;C07A12.4c       | 2665 | 141 | 93  | 813063  | 1.09 | 0.42 | 0.51 | 0.15 | 818  |
| 7 C07A4.2                             | 10   | 5   | 1   | 10359   | 0.53 | 0.04 | 0.32 | 0.29 | 5    |
| 22 C07D8.6                            | 954  | 51  | 43  | 448531  | 0.90 | 0.35 | 0.55 | 0.17 | 385  |
| 10 C07D8.6                            | 791  | 50  | 40  | 449700  | 0.95 | 0.41 | 0.51 | 0.17 | 347  |
| 7 C07D8.6                             | 359  | 29  | 24  | 152652  | 0.91 | 0.39 | 0.52 | 0.14 | 201  |
| 1 C07D8.6                             | 409  | 35  | 11  | 57701   | 1.10 | 0.41 | 0.52 | 0.16 | 76   |
| 10 C07G2.3a;C07G2.3b                  | 750  | 34  | 30  | 187647  | 1.07 | 0.47 | 0.51 | 0.19 | 247  |
| 22 C07G2.3a;C07G2.3b                  | 573  | 29  | 26  | 143917  | 0.87 | 0.31 | 0.54 | 0.14 | 212  |
| 7 C07G2.3a;C07G2.3b                   | 577  | 26  | 22  | 79825   | 0.69 | 0.15 | 0.50 | 0.20 | 165  |
| 1 C07G2.3a;C07G2.3b                   | 362  | 24  | 18  | 134280  | 0.81 | 0.28 | 0.49 | 0.13 | 147  |
| 22 C07H6.5                            | 89   | 7   | 1   | 33613   | 0.29 | 0.00 | 0.00 | 0.21 | 5    |

|                                                 |      |     |    |        |      |      |      |      |     |
|-------------------------------------------------|------|-----|----|--------|------|------|------|------|-----|
| 10 C08A9.1                                      | 332  | 17  | 2  | 162706 | 1.02 | 0.48 | 0.51 | 0.21 | 12  |
| 7 C08B11.7                                      | 173  | 5   | 3  | 5427   | 1.28 | 0.28 | 0.57 | 0.11 | 31  |
| 1 C08B11.7                                      | 105  | 2   | 2  | 3370   | 1.50 | 0.14 | 0.49 | 0.12 | 23  |
| 10 C08B11.7                                     | 282  | 7   | 1  | 12528  | 0.55 | 0.04 | 0.31 | 0.05 | 12  |
| 10 C08B6.8                                      | 34   | 3   | 2  | 9780   | 1.45 | 0.23 | 0.50 | 0.08 | 12  |
| 22 C08B6.8                                      | 35   | 4   | 1  | 11200  | 1.23 | 0.31 | 0.54 | 0.11 | 5   |
| 22 C08B6.9                                      | 93   | 2   | 2  | 3976   | 1.53 | 0.15 | 0.49 | 0.11 | 22  |
| 10 C08B6.9                                      | 82   | 2   | 1  | 3178   | 1.55 | 0.18 | 0.49 | 0.11 | 11  |
| 22 C08H9.2a;C08H9.2b                            | 1681 | 107 | 91 | 251924 | 0.76 | 0.16 | 0.50 | 0.18 | 637 |
| 1 C08H9.2a;C08H9.2b                             | 857  | 77  | 57 | 124521 | 0.97 | 0.45 | 0.50 | 0.18 | 387 |
| 10 C08H9.2a;C08H9.2b                            | 925  | 66  | 52 | 244259 | 1.33 | 0.29 | 0.51 | 0.16 | 401 |
| 7 C08H9.2a;C08H9.2b                             | 609  | 57  | 38 | 264201 | 1.24 | 0.30 | 0.55 | 0.17 | 254 |
| 22 C09D1.1b;C09D1.1g;C09D1.1a;C09D1.1c;C09D1.1d | 122  | 36  | 5  | 330966 | 1.50 | 0.16 | 0.50 | 0.29 | 28  |
| 10 C09D1.1b;C09D1.1g;C09D1.1a;C09D1.1c;C09D1.1d | 123  | 34  | 3  | 282577 | 0.74 | 0.18 | 0.49 | 0.18 | 20  |
| 10 C09D4.5                                      | 211  | 15  | 5  | 288081 | 2.45 | 0.03 | 0.25 | 0.15 | 38  |
| 22 C09D4.5                                      | 202  | 18  | 4  | 276283 | 1.79 | 0.07 | 0.38 | 0.17 | 39  |
| 1 C09D4.5                                       | 226  | 16  | 3  | 112774 | 0.74 | 0.21 | 0.51 | 0.15 | 23  |
| 7 C09D4.5                                       | 116  | 10  | 1  | 93822  | 2.63 | 0.01 | 0.12 | 0.08 | 6   |
| 22 C11D2.4                                      | 237  | 9   | 9  | 65610  | 0.99 | 0.47 | 0.51 | 0.19 | 82  |
| 10 C11D2.4                                      | 182  | 6   | 6  | 53746  | 1.08 | 0.46 | 0.51 | 0.12 | 61  |
| 7 C11D2.4                                       | 175  | 6   | 5  | 21710  | 0.75 | 0.21 | 0.54 | 0.14 | 47  |
| 1 C11D2.4;F28G4.4                               | 311  | 8   | 1  | 10897  | 0.17 | 0.00 | 0.00 | 0.55 | 4   |
| 22 C12C8.2a                                     | 121  | 5   | 1  | 54321  | 0.84 | 0.26 | 0.55 | 0.40 | 7   |
| 22 C12D8.11                                     | 338  | 28  | 18 | 110049 | 1.01 | 0.49 | 0.50 | 0.14 | 158 |
| 10 C12D8.11                                     | 370  | 26  | 17 | 105488 | 0.90 | 0.35 | 0.51 | 0.11 | 167 |
| 1 C12D8.11                                      | 193  | 15  | 10 | 36169  | 0.64 | 0.12 | 0.51 | 0.22 | 65  |
| 7 C12D8.11                                      | 131  | 15  | 1  | 23162  | 1.20 | 0.33 | 0.53 | 0.47 | 4   |
| 10 C13B4.2                                      | 43   | 4   | 3  | 13715  | 0.25 | 0.00 | 0.00 | 0.17 | 21  |
| 22 C13B4.2                                      | 83   | 5   | 2  | 18853  | 0.40 | 0.00 | 0.01 | 0.11 | 19  |
| 10 C14A4.1                                      | 39   | 4   | 2  | 23672  | 1.20 | 0.37 | 0.52 | 0.10 | 18  |
| 7 C14A4.1                                       | 24   | 6   | 1  | 21919  | 1.85 | 0.06 | 0.39 | 0.19 | 7   |
| 22 C14A4.1                                      | 30   | 2   | 1  | 21605  | 1.48 | 0.17 | 0.50 | 0.10 | 5   |
| 22 C14A4.14                                     | 121  | 3   | 1  | 3154   | 0.62 | 0.04 | 0.29 | 0.37 | 6   |
| 22 C14B1.1                                      | 1966 | 75  | 70 | 377682 | 0.88 | 0.32 | 0.54 | 0.16 | 689 |

|                        |      |    |    |         |      |      |      |      |     |
|------------------------|------|----|----|---------|------|------|------|------|-----|
| 7 C14B1.1              | 1609 | 67 | 58 | 259010  | 0.81 | 0.28 | 0.56 | 0.17 | 532 |
| 10 C14B1.1             | 1300 | 62 | 53 | 358285  | 0.86 | 0.31 | 0.51 | 0.18 | 509 |
| 1 C14B1.1              | 907  | 62 | 40 | 133066  | 1.08 | 0.43 | 0.51 | 0.17 | 356 |
| 7 C14B9.2              | 122  | 15 | 5  | 48669   | 0.87 | 0.34 | 0.53 | 0.21 | 40  |
| 10 C14B9.2             | 172  | 8  | 3  | 225859  | 2.03 | 0.07 | 0.41 | 0.19 | 16  |
| 22 C14B9.2             | 100  | 7  | 1  | 40750   | 1.95 | 0.05 | 0.29 | 0.12 | 8   |
| 1 C14B9.2              | 100  | 7  | 1  | 272156  | 1.00 | 0.48 | 0.50 | 0.08 | 4   |
| 22 C14B9.7             | 115  | 10 | 5  | 96742   | 0.40 | 0.00 | 0.01 | 0.25 | 29  |
| 10 C14B9.7             | 116  | 6  | 4  | 45422   | 1.27 | 0.33 | 0.51 | 0.41 | 21  |
| 1 C14B9.7              | 64   | 2  | 2  | 14409   | 0.25 | 0.00 | 0.01 | 0.21 | 23  |
| 10 C14C10.5            | 111  | 15 | 2  | 101029  | 0.73 | 0.17 | 0.49 | 0.16 | 16  |
| 22 C14C10.5;F29B9.12   | 88   | 9  | 5  | 26054   | 0.75 | 0.14 | 0.49 | 0.17 | 30  |
| 1 C14C10.5;F29B9.12    | 71   | 10 | 1  | 78586   | 0.91 | 0.38 | 0.52 | 0.16 | 4   |
| 22 C14F11.1a;C14F11.1b | 439  | 39 | 30 | 158027  | 0.86 | 0.29 | 0.54 | 0.20 | 254 |
| 1 C14F11.1a;C14F11.1b  | 348  | 27 | 24 | 89097   | 1.12 | 0.40 | 0.52 | 0.16 | 199 |
| 7 C14F11.1a;C14F11.1b  | 228  | 18 | 16 | 81816   | 1.08 | 0.43 | 0.51 | 0.14 | 143 |
| 10 C14F11.1a;C14F11.1b | 259  | 23 | 16 | 127187  | 1.06 | 0.48 | 0.50 | 0.19 | 157 |
| 22 C14F11.6            | 139  | 6  | 4  | 35067   | 0.78 | 0.18 | 0.51 | 0.22 | 26  |
| 10 C14F11.6            | 247  | 8  | 2  | 30663   | 1.50 | 0.21 | 0.50 | 0.13 | 14  |
| 1 C14F11.6             | 100  | 4  | 1  | 9725    | 1.24 | 0.30 | 0.51 | 0.12 | 7   |
| 7 C15C8.3a;C15C8.3b    | 166  | 11 | 8  | 72731   | 0.55 | 0.05 | 0.36 | 0.16 | 61  |
| 22 C15C8.3a;C15C8.3b   | 147  | 10 | 7  | 23608   | 0.84 | 0.26 | 0.55 | 0.16 | 48  |
| 1 C15C8.3a;C15C8.3b    | 92   | 14 | 5  | 37751   | 0.69 | 0.16 | 0.49 | 0.17 | 33  |
| 10 C15C8.3a;C15C8.3b   | 95   | 5  | 3  | 57666   | 0.86 | 0.31 | 0.51 | 0.12 | 29  |
| 22 C15H11.7            | 371  | 18 | 9  | 106661  | 1.50 | 0.16 | 0.50 | 0.11 | 71  |
| 10 C15H11.7            | 389  | 17 | 8  | 117202  | 0.71 | 0.16 | 0.50 | 0.13 | 71  |
| 1 C15H11.7             | 316  | 18 | 6  | 46649   | 0.71 | 0.18 | 0.50 | 0.14 | 53  |
| 7 C15H11.7             | 359  | 12 | 6  | 54428   | 5.08 | 0.00 | 0.00 | 0.15 | 39  |
| 22 C15H9.6             | 1403 | 93 | 71 | 1483830 | 1.01 | 0.50 | 0.50 | 0.17 | 663 |
| 10 C15H9.6             | 1401 | 75 | 60 | 1303350 | 0.87 | 0.32 | 0.52 | 0.18 | 537 |
| 7 C15H9.6              | 1509 | 89 | 56 | 318005  | 1.01 | 0.50 | 0.50 | 0.17 | 421 |
| 1 C15H9.6              | 1215 | 70 | 31 | 428699  | 0.79 | 0.26 | 0.50 | 0.20 | 238 |
| 22 C16A3.10a;C16A3.10b | 706  | 27 | 16 | 181466  | 0.82 | 0.24 | 0.53 | 0.17 | 161 |
| 1 C16A3.10a;C16A3.10b  | 475  | 26 | 13 | 67541   | 0.85 | 0.32 | 0.51 | 0.17 | 88  |

|                                  |      |    |    |        |      |      |      |      |     |
|----------------------------------|------|----|----|--------|------|------|------|------|-----|
| 10 C16A3.10a;C16A3.10b;C16A3.10c | 903  | 30 | 26 | 247922 | 0.89 | 0.34 | 0.51 | 0.20 | 230 |
| 7 C16A3.10a;C16A3.10b;C16A3.10c  | 233  | 10 | 8  | 60259  | 1.05 | 0.46 | 0.51 | 0.19 | 54  |
| 22 C16C10.10                     | 65   | 5  | 2  | 17021  | 0.62 | 0.04 | 0.28 | 0.16 | 13  |
| 10 C17B7.11                      | 16   | 2  | 1  | 4475   | 1.36 | 0.27 | 0.50 | 0.15 | 6   |
| 10 C17G1.7                       | 159  | 11 | 6  | 49106  | 1.20 | 0.37 | 0.52 | 0.12 | 54  |
| 1 C17G1.7                        | 280  | 21 | 6  | 24703  | 0.94 | 0.42 | 0.52 | 0.25 | 50  |
| 22 C17G1.7                       | 259  | 10 | 5  | 42082  | 1.19 | 0.34 | 0.54 | 0.15 | 39  |
| 7 C17G1.7                        | 34   | 6  | 4  | 13246  | 1.14 | 0.38 | 0.52 | 0.18 | 33  |
| 22 C17H12.14                     | 1550 | 52 | 49 | 295166 | 1.02 | 0.49 | 0.51 | 0.14 | 544 |
| 10 C17H12.14                     | 1257 | 47 | 40 | 486034 | 1.04 | 0.50 | 0.50 | 0.14 | 398 |
| 1 C17H12.14                      | 1052 | 46 | 36 | 151051 | 1.07 | 0.44 | 0.51 | 0.17 | 286 |
| 7 C17H12.14                      | 542  | 27 | 19 | 223788 | 1.43 | 0.19 | 0.51 | 0.16 | 185 |
| 22 C18A11.7a                     | 892  | 40 | 29 | 152329 | 1.00 | 0.49 | 0.50 | 0.16 | 229 |
| 7 C18A11.7a                      | 579  | 31 | 25 | 72680  | 0.84 | 0.31 | 0.54 | 0.20 | 180 |
| 10 C18A11.7a                     | 856  | 30 | 22 | 118506 | 0.89 | 0.34 | 0.51 | 0.15 | 181 |
| 1 C18A11.7a                      | 369  | 24 | 9  | 39551  | 1.13 | 0.39 | 0.52 | 0.23 | 58  |
| 22 C23G10.3                      | 647  | 32 | 23 | 124536 | 0.94 | 0.41 | 0.53 | 0.18 | 149 |
| 10 C23G10.3                      | 602  | 32 | 22 | 263294 | 0.88 | 0.33 | 0.51 | 0.13 | 166 |
| 1 C23G10.3                       | 653  | 29 | 22 | 69737  | 0.66 | 0.13 | 0.49 | 0.14 | 175 |
| 7 C23G10.3                       | 300  | 20 | 15 | 37256  | 0.84 | 0.31 | 0.54 | 0.17 | 114 |
| 10 C23G10.4b;C23G10.4a           | 353  | 20 | 11 | 72100  | 1.63 | 0.16 | 0.50 | 0.13 | 86  |
| 22 C23G10.4b;C23G10.4a           | 186  | 15 | 10 | 78468  | 1.10 | 0.41 | 0.53 | 0.15 | 74  |
| 7 C23G10.4b;C23G10.4a            | 148  | 23 | 9  | 92862  | 1.17 | 0.36 | 0.53 | 0.16 | 60  |
| 1 C23G10.4b;C23G10.4a            | 57   | 18 | 1  | 39608  | 1.54 | 0.13 | 0.49 | 0.07 | 6   |
| 10 C24A3.4                       | 24   | 5  | 2  | 5013   | 1.54 | 0.19 | 0.48 | 0.14 | 8   |
| 22 C24A3.4                       | 33   | 4  | 1  | 5691   | 0.91 | 0.37 | 0.55 | 0.14 | 5   |
| 22 C25B8.3a;C25B8.3b;C25B8.3c    | 473  | 14 | 14 | 94741  | 2.00 | 0.04 | 0.28 | 0.12 | 155 |
| 10 C25B8.3a;C25B8.3b;C25B8.3c    | 436  | 11 | 6  | 93490  | 0.81 | 0.25 | 0.50 | 0.11 | 72  |
| 1 C25B8.3a;C25B8.3c              | 194  | 6  | 2  | 8474   | 0.94 | 0.42 | 0.52 | 0.14 | 20  |
| 7 C25B8.3b;C25B8.3a;C25B8.3c     | 91   | 5  | 1  | 12736  | 1.52 | 0.15 | 0.50 | 0.17 | 8   |
| 22 C25F6.3                       | 612  | 19 | 13 | 50643  | 1.23 | 0.31 | 0.53 | 0.21 | 114 |
| 10 C25F6.3                       | 407  | 21 | 5  | 90339  | 0.75 | 0.19 | 0.49 | 0.15 | 56  |
| 7 C25F6.3                        | 47   | 18 | 2  | 43852  | 0.77 | 0.23 | 0.56 | 0.21 | 11  |
| 1 C25F6.3                        | 46   | 5  | 1  | 8079   | 1.27 | 0.27 | 0.49 | 0.21 | 5   |

|                               |     |    |    |        |      |      |      |      |     |
|-------------------------------|-----|----|----|--------|------|------|------|------|-----|
| 22 C25F9.5;C25F9.10b          | 18  | 4  | 1  | 19069  | 0.86 | 0.29 | 0.54 | 0.46 | 4   |
| 10 C26D10.2a                  | 334 | 16 | 14 | 90986  | 1.19 | 0.38 | 0.52 | 0.16 | 107 |
| 1 C26D10.2a                   | 214 | 13 | 10 | 55287  | 1.35 | 0.22 | 0.50 | 0.14 | 87  |
| 22 C26D10.2a                  | 215 | 11 | 8  | 91930  | 0.74 | 0.14 | 0.49 | 0.17 | 71  |
| 7 C26D10.2a                   | 218 | 9  | 4  | 10821  | 1.10 | 0.42 | 0.51 | 0.21 | 31  |
| 22 C27D11.1                   | 719 | 36 | 31 | 83516  | 1.09 | 0.42 | 0.53 | 0.15 | 280 |
| 10 C27D11.1                   | 546 | 30 | 24 | 171774 | 0.96 | 0.42 | 0.51 | 0.16 | 192 |
| 1 C27D11.1                    | 176 | 25 | 15 | 37312  | 0.85 | 0.33 | 0.52 | 0.15 | 87  |
| 7 C27D11.1                    | 201 | 16 | 12 | 28124  | 1.03 | 0.48 | 0.51 | 0.22 | 74  |
| 1 C27D6.1                     | 22  | 4  | 1  | 2659   | 0.44 | 0.02 | 0.22 | 0.13 | 5   |
| 22 C27H6.2                    | 81  | 5  | 4  | 18087  | 0.85 | 0.27 | 0.55 | 0.11 | 32  |
| 10 C27H6.2                    | 52  | 4  | 3  | 11076  | 0.85 | 0.30 | 0.51 | 0.16 | 35  |
| 7 C27H6.2                     | 28  | 2  | 1  | 1975   | 0.90 | 0.38 | 0.52 | 0.13 | 5   |
| 22 C27H6.4b;C27H6.4a;C27H6.4c | 122 | 7  | 6  | 18353  | 1.18 | 0.35 | 0.54 | 0.16 | 42  |
| 10 C27H6.4b;C27H6.4a;C27H6.4c | 285 | 11 | 6  | 93935  | 0.66 | 0.11 | 0.49 | 0.10 | 52  |
| 1 C27H6.4b;C27H6.4a;C27H6.4c  | 73  | 2  | 1  | 2441   | 1.53 | 0.13 | 0.49 | 0.19 | 9   |
| 7 C27H6.8                     | 22  | 2  | 2  | 6359   | 0.99 | 0.48 | 0.51 | 0.19 | 26  |
| 22 C28H8.11a                  | 149 | 8  | 6  | 34208  | 1.06 | 0.44 | 0.52 | 0.09 | 52  |
| 7 C28H8.11a;C28H8.11b         | 58  | 6  | 2  | 18246  | 0.98 | 0.47 | 0.50 | 0.20 | 16  |
| 10 C28H8.3                    | 131 | 12 | 4  | 37298  | 1.30 | 0.31 | 0.51 | 0.19 | 29  |
| 1 C28H8.3                     | 59  | 5  | 3  | 4822   | 1.07 | 0.45 | 0.51 | 0.18 | 25  |
| 22 C28H8.3                    | 42  | 7  | 2  | 13645  | 2.11 | 0.03 | 0.26 | 0.17 | 15  |
| 7 C28H8.3                     | 25  | 4  | 1  | 6624   | 1.78 | 0.08 | 0.44 | 0.18 | 5   |
| 7 C29E4.7                     | 221 | 8  | 4  | 177271 | 1.11 | 0.40 | 0.52 | 0.18 | 37  |
| 10 C29E4.7                    | 127 | 7  | 2  | 23086  | 0.96 | 0.42 | 0.51 | 0.30 | 15  |
| 22 C29E4.7                    | 121 | 7  | 1  | 21123  | 0.88 | 0.32 | 0.53 | 0.12 | 8   |
| 1 C29E4.7                     | 124 | 8  | 1  | 22951  | 0.96 | 0.44 | 0.51 | 0.23 | 12  |
| 22 C29E4.8                    | 196 | 16 | 11 | 276615 | 0.92 | 0.37 | 0.55 | 0.16 | 82  |
| 7 C29E4.8                     | 163 | 12 | 9  | 61268  | 0.87 | 0.35 | 0.53 | 0.16 | 72  |
| 10 C29E4.8                    | 174 | 15 | 9  | 333673 | 1.19 | 0.38 | 0.52 | 0.18 | 63  |
| 1 C29E4.8                     | 203 | 12 | 7  | 141554 | 1.07 | 0.45 | 0.51 | 0.19 | 50  |
| 10 C29E6.4                    | 45  | 4  | 1  | 6237   | 1.56 | 0.18 | 0.49 | 0.09 | 4   |
| 10 C29F5.1                    | 112 | 9  | 4  | 45126  | 1.03 | 0.49 | 0.50 | 0.29 | 30  |
| 1 C29F5.1                     | 118 | 7  | 4  | 24007  | 1.01 | 0.49 | 0.49 | 0.16 | 53  |

|                        |      |    |    |        |      |      |      |      |     |
|------------------------|------|----|----|--------|------|------|------|------|-----|
| 22 C29F5.1             | 87   | 6  | 3  | 40344  | 1.09 | 0.42 | 0.53 | 0.17 | 34  |
| 7 C29F5.1              | 20   | 2  | 1  | 3662   | 1.43 | 0.19 | 0.52 | 0.14 | 14  |
| 22 C29F7.2             | 101  | 5  | 3  | 20819  | 0.80 | 0.21 | 0.53 | 0.13 | 17  |
| 22 C29F7.3             | 148  | 4  | 3  | 49055  | 0.59 | 0.03 | 0.26 | 0.10 | 41  |
| 10 C29F7.3             | 179  | 4  | 3  | 29042  | 0.70 | 0.14 | 0.50 | 0.16 | 22  |
| 7 C30C11.2             | 52   | 3  | 2  | 9572   | 1.55 | 0.14 | 0.49 | 0.42 | 11  |
| 22 C30C11.2            | 15   | 3  | 1  | 9083   | 0.64 | 0.05 | 0.31 | 0.15 | 11  |
| 10 C30C11.2            | 49   | 2  | 1  | 6128   | 0.47 | 0.02 | 0.19 | 0.33 | 7   |
| 10 C30C11.4            | 930  | 39 | 30 | 162983 | 0.87 | 0.31 | 0.51 | 0.20 | 236 |
| 22 C30C11.4            | 1075 | 37 | 28 | 143623 | 0.79 | 0.19 | 0.52 | 0.22 | 240 |
| 1 C30C11.4             | 488  | 23 | 17 | 64870  | 1.01 | 0.49 | 0.49 | 0.18 | 134 |
| 7 C30C11.4             | 530  | 23 | 17 | 90752  | 1.02 | 0.49 | 0.51 | 0.20 | 138 |
| 10 C30H7.2b;C30H7.2a   | 217  | 8  | 5  | 29201  | 1.27 | 0.33 | 0.51 | 0.23 | 42  |
| 1 C30H7.2b;C30H7.2a    | 40   | 6  | 4  | 8142   | 0.89 | 0.37 | 0.51 | 0.21 | 34  |
| 22 C30H7.2b;C30H7.2a   | 143  | 7  | 3  | 46982  | 0.99 | 0.48 | 0.51 | 0.23 | 31  |
| 7 C30H7.2b;C30H7.2a    | 78   | 3  | 2  | 7849   | 0.70 | 0.16 | 0.49 | 0.08 | 14  |
| 22 C31C9.2             | 608  | 29 | 21 | 171002 | 0.81 | 0.22 | 0.54 | 0.19 | 151 |
| 10 C31C9.2             | 575  | 24 | 16 | 146472 | 0.88 | 0.32 | 0.51 | 0.18 | 127 |
| 7 C31C9.2              | 334  | 18 | 15 | 54054  | 1.09 | 0.43 | 0.51 | 0.20 | 102 |
| 1 C31C9.2              | 269  | 12 | 4  | 32294  | 0.96 | 0.44 | 0.51 | 0.18 | 30  |
| 22 C32E8.2a            | 39   | 8  | 4  | 49305  | 1.09 | 0.42 | 0.53 | 0.13 | 34  |
| 10 C32E8.2a;C32E8.2b   | 33   | 8  | 1  | 62652  | 1.55 | 0.19 | 0.49 | 0.08 | 4   |
| 1 C32E8.9              | 36   | 2  | 1  | 1593   | 0.87 | 0.34 | 0.51 | 0.21 | 7   |
| 10 C32E8.9             | 52   | 4  | 1  | 9456   | 0.69 | 0.13 | 0.50 | 0.15 | 7   |
| 10 C32F10.8a;C32F10.8b | 885  | 50 | 42 | 299799 | 2.51 | 0.03 | 0.24 | 0.16 | 341 |
| 1 C32F10.8a;C32F10.8b  | 526  | 35 | 28 | 187942 | 1.20 | 0.33 | 0.51 | 0.14 | 222 |
| 22 C32F10.8a;C32F10.8b | 849  | 36 | 27 | 283372 | 1.06 | 0.45 | 0.52 | 0.14 | 236 |
| 7 C32F10.8a;C32F10.8b  | 852  | 58 | 24 | 179173 | 1.53 | 0.15 | 0.50 | 0.17 | 174 |
| 7 C34B2.7              | 30   | 6  | 1  | 12008  | 2.13 | 0.03 | 0.30 | 0.13 | 6   |
| 22 C34B2.7             | 93   | 4  | 1  | 31290  | 1.43 | 0.19 | 0.52 | 0.18 | 6   |
| 10 C34C12.8            | 683  | 22 | 16 | 94351  | 1.18 | 0.39 | 0.52 | 0.18 | 138 |
| 22 C34C12.8            | 779  | 25 | 16 | 141923 | 0.96 | 0.43 | 0.52 | 0.17 | 166 |
| 7 C34C12.8             | 608  | 21 | 14 | 68974  | 1.04 | 0.47 | 0.51 | 0.14 | 123 |
| 1 C34C12.8             | 589  | 18 | 13 | 62050  | 1.54 | 0.13 | 0.50 | 0.18 | 125 |

|                               |      |     |     |        |      |      |      |      |      |
|-------------------------------|------|-----|-----|--------|------|------|------|------|------|
| 10 C34E10.6                   | 1118 | 24  | 20  | 167914 | 0.70 | 0.14 | 0.50 | 0.15 | 171  |
| 22 C34E10.6                   | 1040 | 21  | 15  | 124627 | 0.86 | 0.28 | 0.54 | 0.14 | 136  |
| 1 C34E10.6                    | 905  | 20  | 14  | 66510  | 0.89 | 0.36 | 0.51 | 0.16 | 123  |
| 7 C34E10.6                    | 812  | 16  | 12  | 54096  | 1.26 | 0.29 | 0.55 | 0.19 | 95   |
| 10 C34F11.3b                  | 84   | 10  | 4   | 18324  | 0.78 | 0.22 | 0.50 | 0.22 | 30   |
| 7 C34F11.3b                   | 53   | 5   | 1   | 4083   | 0.89 | 0.37 | 0.52 | 0.19 | 7    |
| 7 C35C5.1                     | 11   | 9   | 1   | 29668  | 6.68 | 0.00 | 0.00 | 0.37 | 4    |
| 22 C35D10.6                   | 24   | 4   | 1   | 9899   | 1.82 | 0.07 | 0.37 | 0.42 | 6    |
| 22 C36A4.4                    | 74   | 3   | 3   | 8734   | 1.24 | 0.30 | 0.54 | 0.20 | 30   |
| 10 C36A4.4                    | 67   | 6   | 1   | 7584   | 0.36 | 0.00 | 0.05 | 0.21 | 6    |
| 22 C36A4.5                    | 16   | 2   | 1   | 27472  | 1.55 | 0.14 | 0.49 | 0.11 | 7    |
| 22 C36A4.9a;C36A4.9b          | 107  | 7   | 6   | 26888  | 1.21 | 0.32 | 0.53 | 0.18 | 30   |
| 10 C36A4.9a;C36A4.9b          | 169  | 7   | 5   | 19154  | 0.86 | 0.31 | 0.51 | 0.21 | 45   |
| 1 C36B1.4                     | 132  | 7   | 5   | 51873  | 1.42 | 0.18 | 0.50 | 0.17 | 32   |
| 22 C36B1.4                    | 130  | 6   | 4   | 59746  | 1.91 | 0.06 | 0.32 | 0.18 | 32   |
| 7 C36B1.4                     | 100  | 5   | 3   | 37379  | 1.25 | 0.30 | 0.55 | 0.19 | 29   |
| 10 C36B1.4                    | 183  | 5   | 3   | 21936  | 0.50 | 0.02 | 0.23 | 0.18 | 35   |
| 7 C36B1.7                     | 33   | 3   | 2   | 9497   | 0.77 | 0.24 | 0.55 | 0.10 | 18   |
| 10 C36E8.5                    | 3532 | 104 | 91  | 411628 | 1.01 | 0.47 | 0.51 | 0.18 | 859  |
| 22 C36E8.5                    | 2585 | 88  | 78  | 386147 | 0.99 | 0.48 | 0.51 | 0.18 | 746  |
| 7 C36E8.5                     | 2680 | 68  | 49  | 203955 | 1.45 | 0.18 | 0.53 | 0.19 | 464  |
| 1 C36E8.5                     | 1065 | 34  | 28  | 79793  | 1.56 | 0.12 | 0.50 | 0.20 | 212  |
| 1 C37C3.6a;C37C3.6c           | 30   | 9   | 6   | 23792  | 1.09 | 0.43 | 0.52 | 0.28 | 40   |
| 10 C37C3.6b;C37C3.6a;C37C3.6c | 377  | 19  | 11  | 59898  | 0.94 | 0.39 | 0.51 | 0.24 | 77   |
| 22 C37C3.6b;C37C3.6a;C37C3.6c | 136  | 11  | 8   | 39732  | 1.07 | 0.44 | 0.52 | 0.27 | 64   |
| 7 C37C3.6b;C37C3.6a;C37C3.6c  | 54   | 9   | 5   | 25604  | 1.09 | 0.42 | 0.51 | 0.19 | 37   |
| 10 C37E2.1                    | 29   | 3   | 1   | 6163   | 1.08 | 0.46 | 0.51 | 0.12 | 7    |
| 22 C37H5.6a;C37H5.6b          | 305  | 18  | 10  | 54068  | 1.02 | 0.48 | 0.51 | 0.18 | 80   |
| 7 C37H5.6a;C37H5.6b           | 499  | 14  | 9   | 25135  | 1.19 | 0.34 | 0.53 | 0.12 | 90   |
| 10 C37H5.6a;C37H5.6b          | 312  | 18  | 7   | 80929  | 0.67 | 0.12 | 0.49 | 0.17 | 63   |
| 1 C37H5.6a;C37H5.6b           | 110  | 10  | 6   | 9905   | 0.81 | 0.28 | 0.49 | 0.18 | 62   |
| 10 C37H5.8                    | 4315 | 168 | 141 | 541174 | 0.93 | 0.38 | 0.52 | 0.17 | 1357 |
| 22 C37H5.8                    | 4135 | 153 | 139 | 518998 | 0.94 | 0.41 | 0.53 | 0.16 | 1314 |
| 1 C37H5.8                     | 2727 | 116 | 97  | 195160 | 1.05 | 0.47 | 0.50 | 0.16 | 781  |

|                                  |      |     |     |         |      |      |      |      |      |
|----------------------------------|------|-----|-----|---------|------|------|------|------|------|
| 7 C37H5.8                        | 3340 | 134 | 76  | 286032  | 0.88 | 0.36 | 0.52 | 0.18 | 728  |
| 22 C39F7.4                       | 492  | 18  | 11  | 189243  | 0.91 | 0.36 | 0.55 | 0.18 | 86   |
| 10 C41A3.1                       | 81   | 27  | 2   | 151040  | 1.14 | 0.42 | 0.51 | 0.15 | 10   |
| 1 C41C4.8                        | 287  | 25  | 22  | 95633   | 0.83 | 0.30 | 0.51 | 0.17 | 202  |
| 22 C41C4.8                       | 864  | 57  | 5   | 302966  | 1.04 | 0.46 | 0.51 | 0.26 | 41   |
| 10 C41C4.8                       | 492  | 42  | 1   | 222387  | 0.86 | 0.30 | 0.51 | 0.24 | 6    |
| 10 C41D11.2                      | 149  | 6   | 3   | 16333   | 3.39 | 0.00 | 0.07 | 0.13 | 24   |
| 22 C41D11.2                      | 80   | 2   | 2   | 2814    | 1.71 | 0.09 | 0.41 | 0.14 | 18   |
| 1 C41D11.2                       | 30   | 2   | 1   | 1469    | 1.17 | 0.35 | 0.51 | 0.07 | 8    |
| 22 C42C1.11a;C42C1.11c           | 219  | 5   | 1   | 13657   | 1.02 | 0.49 | 0.51 | 0.10 | 6    |
| 10 C42C1.11a;C42C1.11c;C42C1.11b | 177  | 6   | 2   | 34619   | 0.89 | 0.34 | 0.51 | 0.07 | 9    |
| 10 C42C1.5                       | 29   | 2   | 1   | 6754    | 0.85 | 0.30 | 0.51 | 0.19 | 9    |
| 10 C42D8.2a;C42D8.2b             | 7089 | 405 | 339 | 1811830 | 0.90 | 0.35 | 0.51 | 0.15 | 2822 |
| 22 C42D8.2a;C42D8.2b             | 6475 | 395 | 338 | 1431130 | 0.78 | 0.18 | 0.50 | 0.17 | 2721 |
| 1 C42D8.2a;C42D8.2b              | 1876 | 217 | 161 | 407922  | 0.69 | 0.16 | 0.49 | 0.16 | 1188 |
| 7 C42D8.2a;C42D8.2b              | 1395 | 194 | 144 | 469030  | 1.10 | 0.42 | 0.51 | 0.17 | 1083 |
| 22 C44B12.2                      | 20   | 6   | 1   | 12497   | 2.32 | 0.02 | 0.21 | 0.06 | 5    |
| 7 C44B7.10                       | 106  | 14  | 6   | 49119   | 1.11 | 0.40 | 0.52 | 0.25 | 33   |
| 1 C44B7.10                       | 230  | 13  | 5   | 37045   | 0.93 | 0.41 | 0.52 | 0.24 | 41   |
| 10 C44B7.10                      | 35   | 10  | 2   | 42956   | 1.00 | 0.46 | 0.51 | 0.18 | 16   |
| 22 C44B7.10                      | 27   | 7   | 1   | 35943   | 0.62 | 0.05 | 0.29 | 0.24 | 8    |
| 22 C44E4.4                       | 1090 | 39  | 34  | 259930  | 1.04 | 0.46 | 0.51 | 0.18 | 348  |
| 10 C44E4.4                       | 385  | 17  | 12  | 86130   | 1.45 | 0.23 | 0.50 | 0.23 | 89   |
| 7 C44E4.4                        | 142  | 14  | 10  | 51039   | 1.11 | 0.40 | 0.52 | 0.19 | 71   |
| 1 C44E4.4                        | 378  | 29  | 8   | 50581   | 1.62 | 0.10 | 0.46 | 0.19 | 48   |
| 10 C45B11.3                      | 102  | 5   | 2   | 13223   | 0.66 | 0.11 | 0.49 | 0.17 | 17   |
| 1 C45B11.3                       | 47   | 3   | 1   | 9248    | 0.61 | 0.10 | 0.47 | 0.09 | 6    |
| 10 C46F11.2a;C46F11.2b           | 874  | 42  | 27  | 277552  | 0.65 | 0.10 | 0.48 | 0.22 | 234  |
| 22 C46F11.2a;C46F11.2b           | 509  | 23  | 19  | 183696  | 0.93 | 0.39 | 0.54 | 0.18 | 163  |
| 1 C46F11.2a;C46F11.2b            | 373  | 16  | 9   | 82197   | 1.01 | 0.49 | 0.50 | 0.17 | 80   |
| 7 C46F11.2b;C46F11.2a            | 670  | 37  | 15  | 174385  | 0.78 | 0.24 | 0.54 | 0.23 | 119  |
| 22 C47B2.3                       | 1332 | 50  | 1   | 462567  | 1.06 | 0.45 | 0.52 | 0.08 | 13   |
| 10 C47B2.4                       | 104  | 11  | 5   | 59594   | 0.99 | 0.45 | 0.51 | 0.12 | 35   |
| 22 C47B2.4                       | 133  | 11  | 4   | 58497   | 1.50 | 0.16 | 0.50 | 0.12 | 35   |

|                                            |      |     |     |         |      |      |      |      |      |
|--------------------------------------------|------|-----|-----|---------|------|------|------|------|------|
| 22 C47B2.6a;C47B2.6b                       | 147  | 7   | 3   | 73749   | 1.85 | 0.06 | 0.34 | 0.22 | 22   |
| 7 C47B2.6a;C47B2.6b                        | 161  | 4   | 3   | 45852   | 2.21 | 0.02 | 0.26 | 0.17 | 31   |
| 10 C47D12.6a;C47D12.6b                     | 925  | 44  | 37  | 115479  | 0.88 | 0.33 | 0.51 | 0.17 | 314  |
| 22 C47D12.6a;C47D12.6b                     | 720  | 36  | 29  | 106265  | 0.72 | 0.11 | 0.48 | 0.18 | 226  |
| 1 C47D12.6a;C47D12.6b                      | 340  | 15  | 8   | 26913   | 0.72 | 0.19 | 0.51 | 0.17 | 44   |
| 7 C47D12.6a;C47D12.6b                      | 485  | 14  | 3   | 45027   | 0.86 | 0.34 | 0.53 | 0.17 | 13   |
| 1 C47E12.1                                 | 619  | 31  | 24  | 119989  | 0.95 | 0.43 | 0.52 | 0.19 | 190  |
| 10 C47E12.1                                | 555  | 24  | 22  | 136769  | 0.77 | 0.21 | 0.50 | 0.17 | 214  |
| 22 C47E12.1                                | 342  | 30  | 18  | 134276  | 0.92 | 0.37 | 0.55 | 0.20 | 127  |
| 7 C47E12.1                                 | 276  | 16  | 11  | 52993   | 0.97 | 0.46 | 0.51 | 0.17 | 85   |
| 10 C47E12.4a;C47E12.4b;C47E12.4c;C47E12.4d | 618  | 29  | 22  | 306989  | 1.07 | 0.47 | 0.51 | 0.23 | 177  |
| 22 C47E12.4a;C47E12.4b;C47E12.4c;C47E12.4d | 506  | 24  | 16  | 147626  | 0.58 | 0.03 | 0.23 | 0.18 | 161  |
| 1 C47E12.4a;C47E12.4b;C47E12.4c;C47E12.4d  | 39   | 10  | 1   | 20185   | 1.07 | 0.45 | 0.51 | 0.19 | 9    |
| 7 C47E12.4a;C47E12.4b;C47E12.4c;C47E12.4d  | 166  | 7   | 1   | 40320   | 0.36 | 0.00 | 0.07 | 0.20 | 8    |
| 10 C47E12.5c;C47E12.5a;C47E12.5b           | 668  | 61  | 32  | 881103  | 1.18 | 0.39 | 0.52 | 0.16 | 251  |
| 22 C47E12.5c;C47E12.5a;C47E12.5b           | 504  | 52  | 28  | 445566  | 0.98 | 0.46 | 0.51 | 0.18 | 242  |
| 1 C47E12.5c;C47E12.5a;C47E12.5b            | 375  | 42  | 16  | 533449  | 1.46 | 0.16 | 0.49 | 0.20 | 123  |
| 7 C47E12.5c;C47E12.5a;C47E12.5b            | 287  | 34  | 8   | 564117  | 1.63 | 0.11 | 0.47 | 0.14 | 67   |
| 10 C47E8.5                                 | 6561 | 272 | 231 | 2477610 | 0.93 | 0.38 | 0.52 | 0.15 | 2256 |
| 22 C47E8.5                                 | 5127 | 255 | 221 | 1960940 | 0.80 | 0.21 | 0.54 | 0.16 | 2137 |
| 1 C47E8.5                                  | 3940 | 176 | 144 | 650924  | 1.07 | 0.45 | 0.51 | 0.18 | 1325 |
| 7 C47E8.5                                  | 5365 | 229 | 142 | 958940  | 1.02 | 0.49 | 0.50 | 0.18 | 1276 |
| 10 C49F5.1                                 | 1422 | 58  | 31  | 310510  | 1.02 | 0.49 | 0.50 | 0.19 | 249  |
| 7 C49F5.1;C06E7.1b                         | 1458 | 64  | 53  | 235309  | 0.90 | 0.38 | 0.52 | 0.17 | 482  |
| 1 C49F5.1;C06E7.1b                         | 851  | 45  | 15  | 122851  | 0.92 | 0.40 | 0.52 | 0.16 | 132  |
| 22 C49F5.1;C56G3.2                         | 2197 | 97  | 67  | 1366130 | 0.93 | 0.39 | 0.55 | 0.17 | 615  |
| 10 C49H3.11                                | 825  | 37  | 27  | 383935  | 0.98 | 0.44 | 0.51 | 0.17 | 228  |
| 22 C49H3.11                                | 585  | 39  | 23  | 685235  | 1.01 | 0.50 | 0.50 | 0.18 | 180  |
| 1 C49H3.11                                 | 629  | 31  | 21  | 389270  | 0.84 | 0.31 | 0.51 | 0.14 | 184  |
| 7 C49H3.11                                 | 379  | 20  | 15  | 159829  | 1.15 | 0.37 | 0.52 | 0.14 | 125  |
| 22 C50B6.2                                 | 225  | 14  | 8   | 76758   | 0.46 | 0.00 | 0.05 | 0.27 | 53   |
| 10 C50B6.2                                 | 116  | 9   | 4   | 31679   | 1.20 | 0.37 | 0.52 | 0.18 | 28   |
| 1 C50B6.2                                  | 295  | 12  | 3   | 46158   | 0.96 | 0.44 | 0.51 | 0.16 | 26   |
| 22 C50F2.6a;C50F2.6b                       | 500  | 18  | 9   | 298361  | 0.78 | 0.19 | 0.51 | 0.15 | 80   |

|                                                      |     |    |    |        |      |      |      |      |     |
|------------------------------------------------------|-----|----|----|--------|------|------|------|------|-----|
| 1 C50F2.6a;C50F2.6b                                  | 341 | 18 | 6  | 225893 | 0.97 | 0.45 | 0.50 | 0.18 | 61  |
| 7 C50F2.6a;C50F2.6b                                  | 295 | 15 | 4  | 260624 | 1.24 | 0.30 | 0.55 | 0.15 | 41  |
| 10 C50F2.6b;C50F2.6a                                 | 366 | 18 | 1  | 290586 | 0.75 | 0.19 | 0.48 | 0.24 | 9   |
| 10 C50F7.10                                          | 235 | 6  | 5  | 10406  | 1.10 | 0.45 | 0.51 | 0.11 | 48  |
| 22 C50F7.10                                          | 125 | 4  | 1  | 10978  | 1.05 | 0.45 | 0.52 | 0.17 | 12  |
| 22 C50F7.4                                           | 918 | 29 | 20 | 230197 | 0.87 | 0.30 | 0.54 | 0.15 | 176 |
| 7 C50F7.4                                            | 301 | 19 | 7  | 39274  | 0.65 | 0.12 | 0.48 | 0.17 | 37  |
| 1 C50F7.4                                            | 612 | 28 | 3  | 42345  | 0.70 | 0.17 | 0.49 | 0.13 | 26  |
| 22 C51E3.9                                           | 68  | 6  | 2  | 13158  | 0.53 | 0.01 | 0.14 | 0.16 | 17  |
| 10 C51E3.9                                           | 27  | 5  | 1  | 11448  | 0.59 | 0.07 | 0.40 | 0.12 | 9   |
| 7 C52A11.4a;C52A11.4d;C52A11.4f;C52A11.4c;C52A11.4b  | 112 | 31 | 4  | 765405 | 1.75 | 0.08 | 0.44 | 0.72 | 19  |
| 22 C52A11.4a;C52A11.4d;C52A11.4f;C52A11.4c;C52A11.4b | 47  | 14 | 2  | 540839 | 7.66 | 0.00 | 0.00 | 0.76 | 8   |
| 1 C52A11.4a;C52A11.4d;C52A11.4f;C52A11.4c;C52A11.4b  | 163 | 36 | 1  | 855519 | 1.71 | 0.08 | 0.42 | 0.60 | 4   |
| 22 C52E4.1                                           | 152 | 6  | 4  | 21365  | 1.08 | 0.43 | 0.53 | 0.18 | 40  |
| 10 C52E4.1                                           | 217 | 5  | 4  | 29005  | 1.67 | 0.15 | 0.49 | 0.09 | 40  |
| 1 C52E4.1                                            | 57  | 3  | 2  | 3808   | 1.89 | 0.04 | 0.31 | 0.25 | 12  |
| 10 C52E4.4                                           | 170 | 11 | 6  | 150586 | 1.41 | 0.25 | 0.50 | 0.17 | 54  |
| 22 C52E4.4                                           | 19  | 3  | 1  | 5984   | 0.83 | 0.24 | 0.54 | 0.23 | 7   |
| 10 C53D5.6                                           | 103 | 24 | 13 | 101082 | 1.10 | 0.45 | 0.51 | 0.20 | 88  |
| 22 C53D5.6                                           | 122 | 18 | 11 | 64670  | 1.61 | 0.12 | 0.49 | 0.18 | 68  |
| 7 C53D5.6                                            | 103 | 15 | 4  | 51858  | 0.63 | 0.10 | 0.46 | 0.14 | 21  |
| 1 C53D5.6                                            | 29  | 7  | 3  | 27997  | 1.18 | 0.35 | 0.51 | 0.19 | 17  |
| 7 C54D1.5                                            | 19  | 4  | 1  | 5922   | 1.21 | 0.32 | 0.54 | 0.07 | 9   |
| 1 C54D1.5                                            | 21  | 5  | 1  | 3522   | 0.83 | 0.30 | 0.50 | 0.20 | 6   |
| 22 C54E4.2a;C54E4.2b                                 | 47  | 2  | 1  | 3463   | 0.77 | 0.17 | 0.50 | 0.14 | 5   |
| 22 C55B7.4a                                          | 70  | 8  | 3  | 36083  | 0.77 | 0.17 | 0.50 | 0.13 | 29  |
| 10 C55B7.4a;C55B7.4b                                 | 66  | 6  | 4  | 28803  | 1.79 | 0.11 | 0.48 | 0.12 | 37  |
| 10 C55F2.1b                                          | 30  | 3  | 2  | 12419  | 1.38 | 0.26 | 0.51 | 0.17 | 15  |
| 22 C55F2.1b                                          | 56  | 2  | 2  | 8118   | 0.84 | 0.27 | 0.55 | 0.13 | 15  |
| 22 C55H1.2                                           | 20  | 5  | 1  | 361802 | 1.28 | 0.27 | 0.54 | 1.08 | 4   |
| 10 C56A3.5                                           | 95  | 5  | 3  | 8198   | 0.68 | 0.13 | 0.49 | 0.27 | 19  |
| 7 C56A3.5                                            | 26  | 3  | 2  | 5510   | 1.37 | 0.22 | 0.55 | 0.20 | 14  |
| 22 C56A3.5                                           | 69  | 5  | 2  | 9328   | 0.99 | 0.47 | 0.51 | 0.20 | 13  |
| 22 C56C10.8                                          | 251 | 11 | 6  | 64812  | 0.15 | 0.00 | 0.00 | 0.34 | 30  |

|             |      |    |    |        |      |      |      |      |     |
|-------------|------|----|----|--------|------|------|------|------|-----|
| 7 C56C10.8  | 87   | 6  | 4  | 24409  | 0.67 | 0.13 | 0.48 | 0.21 | 30  |
| 10 C56C10.8 | 178  | 9  | 4  | 70697  | 0.85 | 0.29 | 0.51 | 0.31 | 27  |
| 22 CD4.6    | 367  | 13 | 8  | 70549  | 1.42 | 0.20 | 0.52 | 0.15 | 62  |
| 7 CD4.6     | 174  | 8  | 3  | 41988  | 0.60 | 0.08 | 0.44 | 0.18 | 18  |
| 10 CD4.6    | 192  | 12 | 3  | 59343  | 1.29 | 0.31 | 0.51 | 0.19 | 20  |
| 10 D1005.1  | 1132 | 55 | 34 | 178174 | 0.98 | 0.45 | 0.51 | 0.19 | 291 |
| 7 D1005.1   | 1264 | 52 | 15 | 133203 | 1.20 | 0.33 | 0.54 | 0.20 | 109 |
| 22 D1025.3  | 20   | 2  | 1  | 18107  | 0.15 | 0.00 | 0.00 | 0.84 | 4   |
| 7 D1053.1   | 46   | 4  | 1  | 12356  | 0.25 | 0.00 | 0.01 | 0.17 | 4   |
| 22 D1053.1  | 65   | 4  | 1  | 6813   | 0.73 | 0.13 | 0.49 | 0.18 | 12  |
| 22 D1054.2  | 753  | 13 | 10 | 107938 | 0.97 | 0.44 | 0.52 | 0.15 | 133 |
| 10 D1054.2  | 602  | 15 | 7  | 84524  | 0.55 | 0.04 | 0.30 | 0.21 | 75  |
| 7 D1054.2   | 295  | 10 | 4  | 29958  | 0.92 | 0.40 | 0.52 | 0.18 | 39  |
| 1 D1054.2   | 336  | 10 | 4  | 25667  | 1.03 | 0.49 | 0.50 | 0.18 | 38  |
| 7 D2013.9   | 41   | 5  | 1  | 9965   | 1.03 | 0.48 | 0.51 | 0.16 | 6   |
| 22 D2023.2  | 284  | 12 | 9  | 41923  | 0.85 | 0.27 | 0.54 | 0.21 | 79  |
| 10 D2023.2  | 161  | 13 | 8  | 88396  | 1.50 | 0.21 | 0.50 | 0.19 | 55  |
| 1 D2023.2   | 188  | 13 | 7  | 24968  | 2.52 | 0.01 | 0.15 | 0.19 | 45  |
| 7 D2023.2   | 311  | 8  | 6  | 11972  | 1.22 | 0.32 | 0.54 | 0.14 | 65  |
| 22 D2023.5  | 248  | 14 | 9  | 51747  | 0.92 | 0.37 | 0.55 | 0.13 | 85  |
| 10 D2023.5  | 230  | 10 | 5  | 46858  | 1.33 | 0.29 | 0.51 | 0.14 | 41  |
| 22 D2045.6  | 46   | 4  | 2  | 28260  | 0.94 | 0.40 | 0.54 | 0.10 | 14  |
| 10 D2045.6  | 40   | 6  | 1  | 35190  | 1.94 | 0.08 | 0.47 | 0.09 | 7   |
| 10 D2085.1  | 61   | 11 | 3  | 366154 | 0.84 | 0.28 | 0.51 | 0.19 | 16  |
| 22 D2085.1  | 50   | 7  | 2  | 12219  | 2.62 | 0.01 | 0.12 | 0.23 | 9   |
| 22 D2096.8  | 317  | 17 | 12 | 139004 | 1.23 | 0.31 | 0.54 | 0.13 | 104 |
| 1 D2096.8   | 307  | 16 | 4  | 49798  | 2.01 | 0.03 | 0.29 | 0.11 | 43  |
| 10 D2096.8  | 243  | 12 | 3  | 125934 | 1.11 | 0.44 | 0.52 | 0.14 | 31  |
| 7 D2096.8   | 57   | 3  | 1  | 15491  | 1.69 | 0.10 | 0.45 | 0.10 | 16  |
| 10 E01G4.6  | 46   | 11 | 4  | 24491  | 1.14 | 0.41 | 0.51 | 0.14 | 34  |
| 1 E01G4.6   | 19   | 9  | 2  | 7509   | 1.35 | 0.22 | 0.50 | 0.20 | 11  |
| 22 E01G4.6  | 22   | 7  | 1  | 16937  | 3.53 | 0.00 | 0.02 | 0.11 | 5   |
| 7 E01G4.6   | 26   | 9  | 1  | 14254  | 0.45 | 0.01 | 0.17 | 0.32 | 7   |
| 22 E03G2.3  | 43   | 9  | 4  | 39330  | 0.94 | 0.40 | 0.54 | 0.20 | 20  |

|                        |      |     |     |         |      |      |      |      |      |
|------------------------|------|-----|-----|---------|------|------|------|------|------|
| 10 E03G2.3             | 23   | 9   | 2   | 45607   | 1.63 | 0.16 | 0.50 | 0.18 | 12   |
| 22 E04A4.8             | 432  | 14  | 10  | 57094   | 0.20 | 0.00 | 0.00 | 0.28 | 62   |
| 10 E04A4.8             | 411  | 17  | 9   | 105355  | 0.49 | 0.02 | 0.21 | 0.28 | 57   |
| 1 E04A4.8              | 182  | 7   | 4   | 19025   | 1.27 | 0.27 | 0.49 | 0.17 | 46   |
| 7 E04A4.8              | 68   | 5   | 3   | 11555   | 0.28 | 0.00 | 0.01 | 0.25 | 20   |
| 1 E04F6.3              | 17   | 3   | 1   | 12027   | 1.01 | 0.49 | 0.50 | 0.11 | 6    |
| 10 E04F6.5a            | 142  | 7   | 4   | 16239   | 1.65 | 0.15 | 0.49 | 0.18 | 29   |
| 22 E04F6.5a;E04F6.5b   | 134  | 5   | 2   | 29187   | 0.63 | 0.05 | 0.29 | 0.10 | 24   |
| 10 F01F1.12a           | 3980 | 139 | 109 | 1618260 | 0.85 | 0.29 | 0.51 | 0.15 | 1073 |
| 1 F01F1.12a            | 3231 | 124 | 93  | 541423  | 1.06 | 0.46 | 0.50 | 0.14 | 819  |
| 22 F01F1.12a;F01F1.12b | 3961 | 150 | 122 | 1878170 | 0.80 | 0.20 | 0.53 | 0.15 | 1126 |
| 7 F01F1.12a;F01F1.12b  | 2896 | 122 | 101 | 803193  | 0.84 | 0.31 | 0.54 | 0.16 | 925  |
| 22 F01F1.15            | 39   | 2   | 1   | 20475   | 2.25 | 0.02 | 0.22 | 0.09 | 12   |
| 7 F01F1.15             | 60   | 2   | 1   | 2370    | 1.26 | 0.29 | 0.55 | 0.09 | 6    |
| 1 F01F1.15             | 78   | 3   | 1   | 22361   | 1.50 | 0.14 | 0.49 | 0.30 | 7    |
| 10 F01F1.15            | 94   | 4   | 1   | 40393   | 2.42 | 0.03 | 0.26 | 0.19 | 8    |
| 10 F01F1.6             | 1878 | 71  | 60  | 269891  | 0.96 | 0.42 | 0.51 | 0.16 | 506  |
| 22 F01F1.6             | 1813 | 66  | 51  | 247699  | 0.88 | 0.32 | 0.53 | 0.16 | 428  |
| 1 F01F1.6              | 1384 | 48  | 40  | 112082  | 1.04 | 0.47 | 0.50 | 0.16 | 298  |
| 7 F01F1.6              | 1130 | 50  | 38  | 149662  | 0.90 | 0.38 | 0.52 | 0.21 | 283  |
| 7 F01F1.8a;F01F1.8b    | 354  | 22  | 17  | 91239   | 1.53 | 0.15 | 0.50 | 0.16 | 123  |
| 22 F01F1.8a;F01F1.8b   | 362  | 23  | 16  | 116575  | 1.34 | 0.24 | 0.54 | 0.15 | 103  |
| 1 F01F1.8a;F01F1.8b    | 164  | 19  | 9   | 53909   | 0.83 | 0.30 | 0.50 | 0.20 | 53   |
| 10 F01F1.8a;F01F1.8b   | 384  | 25  | 9   | 135076  | 1.61 | 0.17 | 0.49 | 0.15 | 67   |
| 7 F01F1.9              | 1037 | 36  | 21  | 198529  | 0.63 | 0.10 | 0.46 | 0.18 | 177  |
| 10 F01F1.9             | 599  | 24  | 18  | 204809  | 1.04 | 0.50 | 0.50 | 0.29 | 120  |
| 22 F01F1.9             | 506  | 16  | 14  | 156178  | 1.53 | 0.15 | 0.49 | 0.16 | 151  |
| 1 F01F1.9              | 313  | 13  | 13  | 112522  | 1.27 | 0.27 | 0.49 | 0.15 | 136  |
| 22 F01G10.1            | 2742 | 121 | 75  | 1022600 | 1.02 | 0.49 | 0.51 | 0.19 | 624  |
| 10 F01G10.1            | 2150 | 109 | 58  | 1123670 | 1.20 | 0.37 | 0.52 | 0.15 | 472  |
| 7 F01G10.1             | 2090 | 114 | 39  | 643026  | 0.92 | 0.41 | 0.51 | 0.17 | 319  |
| 1 F01G10.1             | 1846 | 92  | 31  | 761025  | 1.20 | 0.33 | 0.52 | 0.16 | 222  |
| 22 F01G12.5b;F01G12.5a | 21   | 7   | 2   | 21458   | 1.54 | 0.14 | 0.49 | 0.42 | 8    |
| 7 F01G4.2              | 406  | 7   | 7   | 30399   | 1.06 | 0.45 | 0.52 | 0.13 | 63   |

|                        |     |    |    |        |       |      |      |      |     |
|------------------------|-----|----|----|--------|-------|------|------|------|-----|
| 10 F01G4.2             | 522 | 8  | 7  | 65605  | 0.80  | 0.24 | 0.50 | 0.13 | 87  |
| 1 F01G4.2              | 452 | 7  | 6  | 14621  | 0.61  | 0.10 | 0.46 | 0.12 | 65  |
| 22 F01G4.2             | 446 | 9  | 5  | 55481  | 0.94  | 0.41 | 0.53 | 0.10 | 69  |
| 1 F02A9.4a             | 82  | 5  | 5  | 4017   | 1.47  | 0.15 | 0.50 | 0.11 | 29  |
| 7 F02A9.4a             | 13  | 3  | 1  | 3867   | 0.76  | 0.22 | 0.55 | 0.06 | 7   |
| 10 F02A9.4a            | 82  | 5  | 1  | 12560  | 1.18  | 0.39 | 0.52 | 0.13 | 10  |
| 22 F02E8.1             | 106 | 4  | 2  | 7567   | 1.71  | 0.09 | 0.42 | 0.21 | 16  |
| 1 F02E8.1              | 39  | 2  | 1  | 3968   | 0.74  | 0.21 | 0.51 | 0.09 | 9   |
| 7 F02E8.1              | 54  | 4  | 1  | 7246   | 2.23  | 0.02 | 0.25 | 0.17 | 10  |
| 10 F02E9.9b;F02E9.9a   | 423 | 29 | 18 | 121997 | 1.20  | 0.37 | 0.52 | 0.16 | 141 |
| 7 F02E9.9b;F02E9.9a    | 480 | 30 | 18 | 119335 | 1.37  | 0.22 | 0.55 | 0.15 | 155 |
| 1 F02E9.9b;F02E9.9a    | 438 | 20 | 12 | 65521  | 1.19  | 0.34 | 0.52 | 0.17 | 86  |
| 22 F02E9.9b;F02E9.9a   | 285 | 18 | 10 | 127297 | 1.41  | 0.20 | 0.53 | 0.16 | 96  |
| 10 F07A11.2a;F07A11.2b | 112 | 11 | 7  | 18065  | 1.15  | 0.41 | 0.51 | 0.12 | 59  |
| 22 F07A11.2a;F07A11.2b | 97  | 8  | 5  | 8686   | 1.21  | 0.32 | 0.54 | 0.14 | 41  |
| 1 F07A11.2a;F07A11.2b  | 17  | 4  | 1  | 1212   | 1.00  | 0.48 | 0.50 | 0.14 | 4   |
| 7 F07A11.2a;F07A11.2b  | 28  | 2  | 1  | 2782   | 2.72  | 0.01 | 0.10 | 0.24 | 9   |
| 22 F07A11.5            | 289 | 17 | 8  | 165644 | 1.41  | 0.20 | 0.53 | 0.16 | 71  |
| 10 F07A11.5            | 270 | 14 | 5  | 49339  | 1.82  | 0.11 | 0.48 | 0.14 | 46  |
| 7 F07A11.5             | 129 | 11 | 4  | 27177  | 1.45  | 0.18 | 0.52 | 0.18 | 27  |
| 1 F07A11.5             | 69  | 4  | 2  | 9945   | 0.78  | 0.24 | 0.49 | 0.13 | 10  |
| 22 F07A5.7a;F07A5.7b   | 310 | 18 | 3  | 36932  | 13.28 | 0.00 | 0.00 | 0.26 | 14  |
| 7 F07A5.7a;F07A5.7b    | 40  | 2  | 2  | 3383   | 1.79  | 0.07 | 0.43 | 0.16 | 15  |
| 10 F07A5.7a;F07A5.7b   | 163 | 6  | 2  | 13757  | 1.92  | 0.09 | 0.47 | 0.18 | 14  |
| 1 F07A5.7a;F07A5.7b    | 101 | 6  | 1  | 5671   | 1.35  | 0.22 | 0.50 | 0.13 | 7   |
| 22 F07D10.1            | 397 | 21 | 9  | 323586 | 0.93  | 0.38 | 0.55 | 0.13 | 76  |
| 10 F08A8.2             | 101 | 10 | 4  | 41253  | 0.16  | 0.00 | 0.00 | 0.35 | 25  |
| 22 F08D12.1            | 25  | 4  | 1  | 9517   | 1.16  | 0.36 | 0.55 | 0.16 | 8   |
| 10 F08D12.1            | 45  | 3  | 1  | 6241   | 2.67  | 0.02 | 0.20 | 0.23 | 9   |
| 22 F09B12.3            | 746 | 25 | 12 | 192066 | 1.26  | 0.29 | 0.54 | 0.15 | 133 |
| 10 F09B12.3            | 684 | 24 | 10 | 122618 | 1.71  | 0.13 | 0.50 | 0.17 | 105 |
| 7 F09B12.3             | 249 | 14 | 6  | 50265  | 1.04  | 0.47 | 0.51 | 0.16 | 58  |
| 1 F09B12.3             | 173 | 13 | 2  | 61415  | 2.50  | 0.01 | 0.15 | 0.22 | 10  |
| 10 F09E10.3            | 371 | 13 | 9  | 116098 | 1.18  | 0.39 | 0.52 | 0.16 | 105 |

|                        |      |     |    |        |      |      |      |      |     |
|------------------------|------|-----|----|--------|------|------|------|------|-----|
| 22 F09E10.3            | 427  | 12  | 9  | 64668  | 1.61 | 0.12 | 0.49 | 0.15 | 102 |
| 7 F09E10.3             | 116  | 4   | 4  | 29007  | 2.00 | 0.04 | 0.33 | 0.17 | 42  |
| 1 F09E10.3             | 180  | 4   | 4  | 18302  | 1.97 | 0.03 | 0.30 | 0.15 | 44  |
| 22 F09E5.15a           | 704  | 35  | 20 | 735664 | 1.34 | 0.24 | 0.53 | 0.16 | 187 |
| 10 F09E5.15b;F09E5.15a | 389  | 21  | 13 | 241432 | 0.66 | 0.11 | 0.49 | 0.31 | 76  |
| 7 F09E5.15b;F09E5.15a  | 189  | 16  | 5  | 418493 | 1.44 | 0.19 | 0.52 | 0.15 | 36  |
| 1 F09E5.15b;F09E5.15a  | 476  | 21  | 5  | 387441 | 1.33 | 0.23 | 0.50 | 0.27 | 33  |
| 22 F09E5.3             | 460  | 21  | 19 | 55633  | 0.87 | 0.30 | 0.54 | 0.14 | 165 |
| 1 F09E5.3              | 303  | 19  | 11 | 38652  | 1.10 | 0.42 | 0.52 | 0.17 | 75  |
| 10 F09E5.3             | 428  | 17  | 8  | 59073  | 1.24 | 0.34 | 0.51 | 0.14 | 60  |
| 7 F09E5.3;Y52B11A.1    | 251  | 11  | 8  | 26227  | 0.82 | 0.29 | 0.55 | 0.16 | 63  |
| 10 F09F7.4a            | 208  | 15  | 8  | 43331  | 0.90 | 0.35 | 0.51 | 0.14 | 55  |
| 22 F09F7.4a;F09F7.4b   | 163  | 14  | 8  | 56205  | 1.25 | 0.29 | 0.54 | 0.11 | 72  |
| 1 F09F7.4a;F09F7.4b    | 178  | 13  | 3  | 23712  | 1.07 | 0.45 | 0.50 | 0.17 | 19  |
| 7 F09F7.4a;F09F7.4b    | 52   | 5   | 2  | 9455   | 1.04 | 0.47 | 0.51 | 0.22 | 13  |
| 22 F09G2.9             | 101  | 13  | 3  | 31422  | 1.26 | 0.29 | 0.54 | 0.13 | 21  |
| 10 F10B5.1             | 84   | 13  | 1  | 91440  | 8.70 | 0.00 | 0.00 | 0.41 | 6   |
| 22 F10B5.1             | 124  | 18  | 1  | 349193 | 2.79 | 0.01 | 0.09 | 0.35 | 5   |
| 22 F10C1.2a;F10C1.2b   | 100  | 5   | 4  | 23966  | 1.16 | 0.36 | 0.55 | 0.25 | 30  |
| 10 F10D11.1            | 378  | 24  | 16 | 191132 | 0.72 | 0.16 | 0.50 | 0.26 | 95  |
| 22 F10D11.1            | 220  | 17  | 14 | 193700 | 1.48 | 0.17 | 0.50 | 0.16 | 136 |
| 7 F10D11.1             | 117  | 13  | 10 | 66098  | 1.63 | 0.11 | 0.47 | 0.23 | 81  |
| 1 F10D11.1             | 236  | 17  | 9  | 94655  | 1.54 | 0.13 | 0.49 | 0.17 | 79  |
| 22 F10G7.2             | 1288 | 40  | 28 | 121540 | 0.89 | 0.33 | 0.54 | 0.21 | 230 |
| 10 F10G7.2             | 672  | 33  | 26 | 95752  | 0.91 | 0.36 | 0.51 | 0.15 | 247 |
| 1 F10G7.2              | 236  | 16  | 12 | 22378  | 0.77 | 0.24 | 0.49 | 0.17 | 104 |
| 1 F10G7.8              | 294  | 13  | 10 | 53034  | 1.09 | 0.43 | 0.52 | 0.12 | 79  |
| 10 F10G7.8             | 319  | 11  | 9  | 71056  | 0.81 | 0.25 | 0.50 | 0.10 | 81  |
| 7 F10G7.8              | 402  | 18  | 9  | 54158  | 1.23 | 0.31 | 0.55 | 0.13 | 66  |
| 22 F10G7.8             | 267  | 12  | 8  | 75215  | 0.82 | 0.23 | 0.54 | 0.16 | 76  |
| 10 F11C3.3             | 1612 | 106 | 82 | 335065 | 0.73 | 0.17 | 0.49 | 0.23 | 648 |
| 22 F11C3.3             | 1101 | 72  | 61 | 159538 | 1.36 | 0.23 | 0.54 | 0.17 | 479 |
| 1 F11C3.3              | 591  | 52  | 40 | 86856  | 1.39 | 0.20 | 0.50 | 0.19 | 276 |
| 7 F11C3.3              | 475  | 42  | 18 | 69191  | 1.38 | 0.22 | 0.54 | 0.17 | 130 |

|                                        |      |    |    |        |      |      |      |      |     |
|----------------------------------------|------|----|----|--------|------|------|------|------|-----|
| 10 F11G11.2                            | 441  | 30 | 17 | 86283  | 0.75 | 0.19 | 0.49 | 0.19 | 144 |
| 22 F11G11.2                            | 317  | 19 | 15 | 48017  | 0.72 | 0.11 | 0.48 | 0.21 | 138 |
| 7 F11G11.2                             | 391  | 19 | 13 | 41562  | 0.65 | 0.12 | 0.48 | 0.15 | 133 |
| 1 F11G11.2                             | 475  | 14 | 10 | 21311  | 1.35 | 0.22 | 0.50 | 0.15 | 104 |
| 22 F11G11.3                            | 39   | 3  | 2  | 8628   | 1.01 | 0.50 | 0.50 | 0.20 | 16  |
| 10 F11G11.3                            | 57   | 6  | 1  | 22514  | 0.58 | 0.06 | 0.38 | 0.13 | 11  |
| 22 F11H8.4a;F11H8.4b                   | 48   | 12 | 6  | 20448  | 0.53 | 0.01 | 0.14 | 0.12 | 30  |
| 7 F13B10.2a;F13B10.2c;F13B10.2d        | 398  | 17 | 14 | 43528  | 0.67 | 0.14 | 0.48 | 0.16 | 95  |
| 22 F13B10.2a;F13B10.2d;F13B10.2c       | 1010 | 63 | 42 | 961182 | 0.98 | 0.46 | 0.51 | 0.14 | 312 |
| 10 F13B10.2a;F13B10.2d;F13B10.2c       | 866  | 52 | 28 | 488717 | 1.86 | 0.10 | 0.48 | 0.19 | 187 |
| 22 F13D12.2                            | 311  | 18 | 11 | 62091  | 0.98 | 0.46 | 0.51 | 0.12 | 116 |
| 10 F13D12.2                            | 322  | 20 | 9  | 61832  | 0.95 | 0.41 | 0.51 | 0.14 | 91  |
| 7 F13D12.2                             | 86   | 9  | 1  | 9940   | 2.13 | 0.03 | 0.28 | 0.07 | 9   |
| 1 F13D12.2                             | 107  | 11 | 1  | 5511   | 0.84 | 0.32 | 0.51 | 0.13 | 6   |
| 10 F13D12.4a;F13D12.4b                 | 2435 | 55 | 53 | 364955 | 1.23 | 0.35 | 0.51 | 0.19 | 588 |
| 7 F13D12.4a;F13D12.4b                  | 1886 | 48 | 46 | 233899 | 1.02 | 0.49 | 0.51 | 0.18 | 508 |
| 22 F13D12.4a;F13D12.4b                 | 1984 | 56 | 42 | 296105 | 1.04 | 0.47 | 0.51 | 0.20 | 444 |
| 1 F13D12.4a;F13D12.4b                  | 1159 | 52 | 29 | 117231 | 0.90 | 0.38 | 0.52 | 0.20 | 275 |
| 7 F13D12.6                             | 58   | 3  | 2  | 3906   | 0.83 | 0.30 | 0.55 | 0.23 | 17  |
| 22 F13D12.6                            | 66   | 2  | 1  | 2999   | 1.57 | 0.13 | 0.49 | 0.13 | 9   |
| 22 F13E6.3                             | 107  | 11 | 1  | 45084  | 0.73 | 0.13 | 0.49 | 0.50 | 4   |
| 10 F13E6.3                             | 116  | 16 | 1  | 89866  | 1.70 | 0.14 | 0.50 | 0.45 | 5   |
| 10 F13G3.5a                            | 233  | 16 | 12 | 118641 | 0.77 | 0.21 | 0.49 | 0.20 | 104 |
| 22 F13G3.5a                            | 243  | 13 | 9  | 55703  | 0.76 | 0.16 | 0.50 | 0.20 | 61  |
| 7 F13G3.5a;F13G3.5b                    | 102  | 10 | 8  | 35602  | 0.63 | 0.10 | 0.46 | 0.23 | 62  |
| 1 F13G3.5b                             | 46   | 6  | 2  | 4809   | 1.00 | 0.48 | 0.50 | 0.18 | 9   |
| 22 F15G9.4d;F15G9.4a;F15G9.4b;F15G9.4c | 233  | 21 | 6  | 116182 | 1.15 | 0.37 | 0.55 | 0.15 | 39  |
| 10 F15G9.4d;F15G9.4a;F15G9.4b;F15G9.4c | 248  | 24 | 5  | 272288 | 1.19 | 0.38 | 0.52 | 0.19 | 38  |
| 7 F15G9.4d;F15G9.4a;F15G9.4b;F15G9.4c  | 80   | 12 | 1  | 40111  | 0.32 | 0.00 | 0.03 | 0.19 | 5   |
| 10 F17A9.4                             | 120  | 6  | 3  | 5852   | 1.32 | 0.30 | 0.51 | 0.21 | 19  |
| 22 F17A9.4                             | 100  | 6  | 2  | 5934   | 1.23 | 0.31 | 0.54 | 0.12 | 14  |
| 22 F17C11.9a;F17C11.9b;F17C11.9c       | 986  | 41 | 37 | 461790 | 0.91 | 0.36 | 0.55 | 0.14 | 327 |
| 10 F17C11.9a;F17C11.9b;F17C11.9c       | 639  | 36 | 25 | 382276 | 1.06 | 0.48 | 0.51 | 0.16 | 185 |
| 7 F17C11.9a;F17C11.9c;F17C11.9b        | 492  | 33 | 27 | 332278 | 0.82 | 0.29 | 0.55 | 0.15 | 192 |

|                                 |      |    |    |        |      |      |      |      |     |
|---------------------------------|------|----|----|--------|------|------|------|------|-----|
| 1 F17C11.9a;F17C11.9c;F17C11.9b | 335  | 26 | 8  | 193285 | 0.85 | 0.33 | 0.52 | 0.13 | 50  |
| 10 F17C8.9                      | 41   | 5  | 2  | 6918   | 0.83 | 0.27 | 0.51 | 0.15 | 15  |
| 22 F17C8.9                      | 71   | 5  | 1  | 8815   | 0.92 | 0.38 | 0.55 | 0.36 | 4   |
| 22 F18C12.1                     | 50   | 10 | 1  | 36351  | 1.97 | 0.05 | 0.29 | 0.44 | 4   |
| 22 F18E2.2                      | 18   | 5  | 1  | 17117  | 0.77 | 0.17 | 0.50 | 0.16 | 4   |
| 7 F20B6.2                       | 1473 | 57 | 38 | 329758 | 0.95 | 0.44 | 0.51 | 0.18 | 287 |
| 10 F20B6.2                      | 1144 | 49 | 31 | 300085 | 0.88 | 0.32 | 0.51 | 0.15 | 208 |
| 22 F20B6.2                      | 1449 | 45 | 29 | 248757 | 1.03 | 0.48 | 0.51 | 0.17 | 236 |
| 1 F20B6.2                       | 1046 | 40 | 23 | 192564 | 1.42 | 0.18 | 0.50 | 0.18 | 157 |
| 22 F20G2.2                      | 398  | 8  | 7  | 23951  | 1.31 | 0.26 | 0.55 | 0.16 | 61  |
| 10 F20G2.2                      | 421  | 6  | 4  | 13833  | 0.59 | 0.06 | 0.38 | 0.13 | 33  |
| 10 F20G4.3                      | 51   | 14 | 8  | 57021  | 1.07 | 0.47 | 0.51 | 0.12 | 63  |
| 22 F20G4.3                      | 71   | 14 | 4  | 65653  | 1.25 | 0.30 | 0.54 | 0.13 | 28  |
| 1 F20G4.3                       | 46   | 8  | 3  | 13942  | 1.06 | 0.45 | 0.50 | 0.14 | 19  |
| 22 F20H11.3                     | 2138 | 64 | 57 | 329478 | 0.75 | 0.15 | 0.49 | 0.20 | 490 |
| 1 F20H11.3                      | 699  | 35 | 27 | 54776  | 0.83 | 0.30 | 0.51 | 0.21 | 236 |
| 10 F20H11.3                     | 1226 | 36 | 27 | 277236 | 0.86 | 0.31 | 0.51 | 0.17 | 283 |
| 7 F20H11.3                      | 677  | 28 | 26 | 87348  | 0.78 | 0.24 | 0.54 | 0.18 | 217 |
| 10 F21D5.1                      | 12   | 2  | 2  | 4529   | 1.19 | 0.38 | 0.52 | 0.12 | 16  |
| 7 F21D5.1                       | 23   | 3  | 1  | 5762   | 0.87 | 0.35 | 0.53 | 0.20 | 6   |
| 10 F21F8.3                      | 994  | 12 | 11 | 29924  | 0.84 | 0.28 | 0.51 | 0.15 | 141 |
| 22 F21F8.3                      | 907  | 12 | 10 | 37529  | 1.06 | 0.45 | 0.52 | 0.15 | 129 |
| 7 F21F8.3                       | 614  | 11 | 9  | 23580  | 1.09 | 0.42 | 0.51 | 0.17 | 108 |
| 1 F21F8.3                       | 673  | 13 | 9  | 20762  | 1.10 | 0.41 | 0.52 | 0.17 | 100 |
| 10 F21F8.7                      | 264  | 22 | 15 | 98283  | 0.82 | 0.26 | 0.51 | 0.18 | 118 |
| 7 F21F8.7                       | 348  | 19 | 15 | 95426  | 0.95 | 0.43 | 0.51 | 0.21 | 109 |
| 22 F21F8.7                      | 237  | 20 | 14 | 75327  | 1.20 | 0.33 | 0.54 | 0.17 | 119 |
| 1 F21F8.7                       | 113  | 16 | 5  | 18001  | 0.67 | 0.14 | 0.49 | 0.16 | 30  |
| 22 F21H12.6                     | 231  | 11 | 8  | 41506  | 0.77 | 0.18 | 0.51 | 0.19 | 67  |
| 10 F21H12.6                     | 97   | 12 | 6  | 204676 | 0.81 | 0.25 | 0.50 | 0.24 | 53  |
| 10 F22B5.9                      | 282  | 15 | 9  | 50441  | 0.99 | 0.45 | 0.51 | 0.20 | 71  |
| 22 F22B5.9                      | 185  | 9  | 4  | 9983   | 1.31 | 0.26 | 0.55 | 0.12 | 24  |
| 7 F22B5.9                       | 36   | 3  | 3  | 28634  | 1.22 | 0.32 | 0.54 | 0.27 | 24  |
| 7 F22D6.3a                      | 210  | 15 | 7  | 18598  | 0.67 | 0.14 | 0.49 | 0.15 | 35  |

|                      |      |    |    |        |      |      |      |      |     |
|----------------------|------|----|----|--------|------|------|------|------|-----|
| 1 F22D6.3a           | 83   | 9  | 4  | 12186  | 0.76 | 0.22 | 0.50 | 0.19 | 21  |
| 10 F22D6.3a          | 218  | 8  | 4  | 21786  | 1.11 | 0.44 | 0.52 | 0.14 | 35  |
| 22 F22D6.3a          | 319  | 13 | 3  | 29723  | 1.05 | 0.46 | 0.52 | 0.14 | 22  |
| 10 F22G12.4          | 39   | 5  | 1  | 7520   | 1.88 | 0.09 | 0.48 | 0.14 | 7   |
| 10 F23B12.5          | 255  | 15 | 10 | 123785 | 1.14 | 0.42 | 0.51 | 0.18 | 75  |
| 1 F23B12.5           | 49   | 10 | 5  | 35488  | 0.77 | 0.24 | 0.50 | 0.15 | 33  |
| 22 F23B12.5          | 120  | 12 | 3  | 86993  | 0.99 | 0.47 | 0.51 | 0.12 | 23  |
| 7 F23B12.5           | 76   | 4  | 1  | 5891   | 0.45 | 0.01 | 0.17 | 0.31 | 8   |
| 22 F23C8.5           | 1391 | 56 | 48 | 318355 | 0.94 | 0.40 | 0.54 | 0.17 | 372 |
| 10 F23C8.5           | 1274 | 47 | 44 | 470758 | 0.95 | 0.41 | 0.51 | 0.15 | 380 |
| 1 F23C8.5            | 1173 | 44 | 43 | 202520 | 1.31 | 0.24 | 0.49 | 0.17 | 346 |
| 7 F23C8.5            | 1030 | 42 | 36 | 177267 | 1.47 | 0.17 | 0.52 | 0.17 | 290 |
| 22 F23F1.8b          | 242  | 4  | 4  | 18240  | 0.98 | 0.46 | 0.51 | 0.19 | 30  |
| 7 F23F1.8b;F23F1.8a  | 20   | 2  | 1  | 2015   | 0.90 | 0.38 | 0.52 | 0.06 | 4   |
| 22 F23H11.3          | 39   | 6  | 3  | 15793  | 1.34 | 0.24 | 0.54 | 0.18 | 24  |
| 22 F25B4.1           | 57   | 9  | 4  | 29474  | 1.78 | 0.08 | 0.38 | 0.21 | 26  |
| 10 F25B4.1           | 93   | 6  | 4  | 22876  | 3.99 | 0.00 | 0.04 | 0.17 | 31  |
| 22 F25D1.1a;F25D1.1b | 40   | 4  | 2  | 8040   | 1.89 | 0.06 | 0.33 | 0.21 | 11  |
| 7 F25D1.1a;F25D1.1b  | 90   | 3  | 2  | 3645   | 1.89 | 0.06 | 0.37 | 0.15 | 15  |
| 22 F25D7.4a;F25D7.4b | 16   | 3  | 1  | 29392  | 0.74 | 0.14 | 0.49 | 0.25 | 8   |
| 10 F25D7.4b          | 33   | 5  | 2  | 14323  | 0.98 | 0.44 | 0.52 | 0.11 | 13  |
| 22 F25G6.9           | 28   | 4  | 3  | 2738   | 1.07 | 0.44 | 0.52 | 0.18 | 17  |
| 10 F25G6.9           | 38   | 6  | 3  | 9289   | 1.05 | 0.49 | 0.51 | 0.18 | 16  |
| 10 F25H2.10          | 176  | 11 | 6  | 18725  | 1.36 | 0.27 | 0.51 | 0.13 | 64  |
| 22 F25H2.10          | 79   | 8  | 4  | 30633  | 3.26 | 0.00 | 0.04 | 0.12 | 41  |
| 1 F25H2.10           | 48   | 3  | 3  | 1812   | 0.97 | 0.45 | 0.50 | 0.11 | 22  |
| 22 F25H2.11          | 1322 | 33 | 28 | 535096 | 0.92 | 0.38 | 0.55 | 0.14 | 361 |
| 10 F25H2.11          | 1242 | 27 | 24 | 210053 | 0.72 | 0.16 | 0.50 | 0.16 | 254 |
| 7 F25H2.11           | 644  | 15 | 15 | 58579  | 0.87 | 0.35 | 0.53 | 0.12 | 178 |
| 1 F25H2.11           | 446  | 16 | 13 | 58280  | 1.20 | 0.32 | 0.51 | 0.13 | 137 |
| 1 F25H2.9            | 526  | 26 | 23 | 116601 | 1.04 | 0.48 | 0.50 | 0.14 | 236 |
| 22 F25H2.9           | 618  | 24 | 20 | 155299 | 1.10 | 0.41 | 0.53 | 0.14 | 206 |
| 10 F25H2.9           | 524  | 21 | 16 | 144136 | 1.01 | 0.47 | 0.51 | 0.13 | 174 |
| 7 F25H2.9            | 420  | 14 | 12 | 49693  | 1.10 | 0.42 | 0.51 | 0.14 | 127 |

|                                       |      |     |     |         |      |      |      |      |      |
|---------------------------------------|------|-----|-----|---------|------|------|------|------|------|
| 7 F25H5.3b;F25H5.3a;F25H5.3c;F25H5.3d | 199  | 21  | 15  | 37341   | 0.97 | 0.46 | 0.51 | 0.17 | 106  |
| 10 F25H5.3b;F25H5.3c                  | 557  | 25  | 17  | 84155   | 0.94 | 0.40 | 0.51 | 0.13 | 140  |
| 22 F25H5.3b;F25H5.3c                  | 205  | 19  | 14  | 56434   | 0.98 | 0.46 | 0.51 | 0.18 | 97   |
| 1 F25H5.3e;F25H5.3c                   | 131  | 9   | 4   | 17910   | 1.56 | 0.12 | 0.51 | 0.21 | 33   |
| 10 F25H5.4                            | 2578 | 163 | 145 | 4346420 | 1.13 | 0.42 | 0.51 | 0.15 | 1278 |
| 22 F25H5.4                            | 2737 | 152 | 127 | 4340030 | 0.97 | 0.45 | 0.52 | 0.15 | 1097 |
| 7 F25H5.4                             | 1578 | 103 | 83  | 1282600 | 0.92 | 0.41 | 0.51 | 0.15 | 725  |
| 1 F25H5.4                             | 1158 | 107 | 79  | 1109610 | 1.06 | 0.46 | 0.50 | 0.15 | 671  |
| 22 F26D10.3                           | 7550 | 269 | 223 | 3321510 | 0.91 | 0.36 | 0.56 | 0.16 | 2054 |
| 7 F26D10.3                            | 7062 | 288 | 175 | 1137010 | 0.90 | 0.38 | 0.52 | 0.17 | 1423 |
| 1 F26D10.3                            | 6380 | 263 | 170 | 1116430 | 0.98 | 0.46 | 0.50 | 0.16 | 1504 |
| 10 F26D10.3;F11D5.6                   | 7749 | 280 | 220 | 3719610 | 1.04 | 0.49 | 0.50 | 0.17 | 1990 |
| 10 F26E4.8;C47B2.3;Y19D2B.1           | 1250 | 53  | 31  | 505302  | 1.11 | 0.44 | 0.51 | 0.16 | 264  |
| 1 F26E4.8;C47B2.3;Y19D2B.1            | 1092 | 41  | 23  | 186583  | 1.56 | 0.12 | 0.51 | 0.19 | 186  |
| 7 F26E4.8;C47B2.3;Y19D2B.1            | 1324 | 43  | 16  | 249925  | 1.12 | 0.39 | 0.52 | 0.17 | 134  |
| 22 F26E4.8;Y19D2B.1                   | 1342 | 54  | 31  | 482651  | 0.99 | 0.48 | 0.51 | 0.17 | 266  |
| 22 F26F4.10a;F26F4.10b;F26F4.10c      | 278  | 11  | 7   | 43940   | 0.97 | 0.44 | 0.52 | 0.14 | 71   |
| 10 F26F4.10a;F26F4.10c                | 278  | 17  | 8   | 55540   | 0.70 | 0.14 | 0.50 | 0.13 | 92   |
| 1 F26F4.10a;F26F4.10c                 | 36   | 6   | 1   | 7522    | 1.08 | 0.43 | 0.51 | 0.12 | 8    |
| 22 F26H11.4                           | 45   | 9   | 1   | 19396   | 0.58 | 0.02 | 0.23 | 0.72 | 5    |
| 22 F26H9.5                            | 359  | 21  | 20  | 197589  | 1.04 | 0.47 | 0.51 | 0.17 | 163  |
| 7 F26H9.5                             | 159  | 13  | 11  | 72080   | 1.34 | 0.24 | 0.55 | 0.14 | 89   |
| 10 F26H9.5                            | 153  | 15  | 9   | 89529   | 1.42 | 0.24 | 0.50 | 0.20 | 68   |
| 1 F26H9.5                             | 222  | 13  | 7   | 61850   | 0.92 | 0.40 | 0.52 | 0.13 | 67   |
| 1 F26H9.6                             | 25   | 2   | 1   | 811     | 1.04 | 0.48 | 0.50 | 0.23 | 7    |
| 10 F26H9.6                            | 135  | 4   | 1   | 10862   | 0.63 | 0.09 | 0.46 | 0.30 | 11   |
| 22 F26H9.6                            | 144  | 4   | 1   | 11857   | 1.63 | 0.12 | 0.48 | 0.13 | 11   |
| 10 F27C1.7b                           | 52   | 3   | 1   | 7460    | 0.90 | 0.35 | 0.51 | 0.32 | 6    |
| 22 F27C1.7b;F27C1.7a                  | 32   | 3   | 2   | 10654   | 2.16 | 0.03 | 0.25 | 0.17 | 11   |
| 22 F27D4.1                            | 2863 | 112 | 78  | 417214  | 0.85 | 0.28 | 0.54 | 0.18 | 642  |
| 10 F27D4.1                            | 2421 | 99  | 74  | 464820  | 0.73 | 0.17 | 0.49 | 0.16 | 693  |
| 7 F27D4.1                             | 1426 | 66  | 49  | 258530  | 1.19 | 0.34 | 0.53 | 0.16 | 445  |
| 1 F27D4.1                             | 1543 | 71  | 49  | 193922  | 0.96 | 0.44 | 0.51 | 0.18 | 417  |
| 10 F27D4.5                            | 36   | 4   | 2   | 15513   | 0.74 | 0.18 | 0.50 | 0.32 | 12   |

|                   |     |    |    |        |      |      |      |      |     |
|-------------------|-----|----|----|--------|------|------|------|------|-----|
| 22 F27D9.5        | 860 | 79 | 70 | 468820 | 1.02 | 0.48 | 0.51 | 0.15 | 535 |
| 10 F27D9.5        | 803 | 73 | 68 | 363230 | 0.80 | 0.24 | 0.50 | 0.15 | 521 |
| 7 F27D9.5         | 610 | 61 | 47 | 171054 | 0.91 | 0.39 | 0.52 | 0.17 | 343 |
| 1 F27D9.5         | 284 | 65 | 43 | 197377 | 1.24 | 0.29 | 0.50 | 0.17 | 289 |
| 10 F28A10.6       | 25  | 4  | 2  | 44335  | 1.68 | 0.14 | 0.50 | 0.13 | 23  |
| 22 F28A12.4       | 130 | 5  | 3  | 16188  | 0.91 | 0.36 | 0.55 | 0.12 | 35  |
| 10 F28H1.3        | 177 | 17 | 10 | 65390  | 1.05 | 0.49 | 0.50 | 0.25 | 77  |
| 1 F28H1.3         | 22  | 2  | 1  | 1444   | 1.32 | 0.24 | 0.50 | 0.23 | 6   |
| 22 F28H1.3        | 62  | 7  | 1  | 19835  | 2.09 | 0.03 | 0.26 | 0.61 | 6   |
| 22 F28H7.3        | 112 | 5  | 3  | 19700  | 0.96 | 0.44 | 0.52 | 0.18 | 28  |
| 10 F28H7.3        | 38  | 2  | 2  | 5343   | 0.68 | 0.13 | 0.49 | 0.12 | 17  |
| 1 F28H7.3         | 21  | 2  | 1  | 1894   | 0.54 | 0.05 | 0.34 | 0.26 | 6   |
| 22 F29C12.4       | 385 | 15 | 13 | 53076  | 1.11 | 0.40 | 0.54 | 0.16 | 123 |
| 10 F29C12.4       | 225 | 15 | 12 | 38408  | 1.04 | 0.50 | 0.50 | 0.14 | 106 |
| 1 F29C12.4        | 197 | 10 | 6  | 11952  | 1.31 | 0.25 | 0.49 | 0.13 | 54  |
| 7 F29C12.4        | 178 | 8  | 5  | 8846   | 1.34 | 0.24 | 0.55 | 0.14 | 39  |
| 7 F29F11.1        | 118 | 4  | 3  | 18186  | 0.48 | 0.02 | 0.24 | 0.16 | 29  |
| 10 F29F11.1       | 86  | 3  | 2  | 19883  | 1.49 | 0.21 | 0.50 | 0.14 | 25  |
| 22 F29F11.1       | 92  | 5  | 2  | 29889  | 0.82 | 0.24 | 0.53 | 0.11 | 26  |
| 10 F29G9.5        | 109 | 6  | 2  | 35946  | 0.71 | 0.15 | 0.50 | 0.19 | 24  |
| 10 F31C3.1        | 179 | 8  | 1  | 50621  | 3.81 | 0.00 | 0.04 | 0.19 | 4   |
| 22 F31D4.3        | 506 | 21 | 14 | 146684 | 0.86 | 0.29 | 0.54 | 0.17 | 111 |
| 7 F31D4.3         | 307 | 12 | 6  | 35442  | 0.49 | 0.03 | 0.27 | 0.17 | 44  |
| 10 F31D4.3        | 191 | 6  | 2  | 37341  | 0.26 | 0.00 | 0.00 | 0.27 | 14  |
| 1 F31D4.3         | 286 | 19 | 2  | 22032  | 0.47 | 0.02 | 0.27 | 0.17 | 13  |
| 1 F32B5.1;W10C8.5 | 734 | 40 | 33 | 152797 | 0.91 | 0.38 | 0.52 | 0.13 | 320 |
| 22 F32B5.8        | 215 | 7  | 6  | 30156  | 0.90 | 0.34 | 0.54 | 0.19 | 61  |
| 1 F32B5.8         | 104 | 7  | 3  | 24779  | 0.75 | 0.22 | 0.50 | 0.15 | 32  |
| 10 F32B5.8        | 183 | 3  | 3  | 32906  | 0.90 | 0.35 | 0.51 | 0.14 | 42  |
| 7 F32B5.8         | 76  | 2  | 1  | 5668   | 0.77 | 0.24 | 0.55 | 0.22 | 12  |
| 10 F32B6.2        | 122 | 5  | 4  | 10452  | 1.10 | 0.44 | 0.51 | 0.18 | 39  |
| 22 F32B6.2        | 138 | 5  | 4  | 8410   | 1.11 | 0.41 | 0.53 | 0.20 | 31  |
| 7 F32B6.2         | 36  | 2  | 1  | 1878   | 1.51 | 0.16 | 0.50 | 0.31 | 5   |
| 1 F32D1.5         | 56  | 12 | 6  | 43864  | 1.28 | 0.27 | 0.49 | 0.12 | 43  |

|              |     |    |    |        |      |      |      |      |     |
|--------------|-----|----|----|--------|------|------|------|------|-----|
| 10 F32D1.5   | 67  | 16 | 6  | 325244 | 2.16 | 0.05 | 0.36 | 0.11 | 46  |
| 22 F32D1.5   | 96  | 11 | 4  | 67269  | 1.23 | 0.31 | 0.54 | 0.12 | 27  |
| 7 F32D1.5    | 59  | 9  | 2  | 120717 | 1.22 | 0.32 | 0.54 | 0.11 | 13  |
| 10 F32H2.5   | 522 | 46 | 36 | 85277  | 1.05 | 0.49 | 0.50 | 0.16 | 288 |
| 22 F32H2.5   | 127 | 30 | 25 | 82801  | 1.01 | 0.50 | 0.50 | 0.18 | 185 |
| 1 F32H2.5    | 30  | 10 | 7  | 10164  | 0.94 | 0.41 | 0.52 | 0.23 | 39  |
| 7 F32H2.5    | 112 | 9  | 6  | 17913  | 1.01 | 0.50 | 0.50 | 0.15 | 40  |
| 22 F33A8.3   | 22  | 3  | 2  | 14410  | 1.53 | 0.15 | 0.49 | 0.12 | 13  |
| 1 F33A8.3    | 33  | 4  | 2  | 13860  | 1.55 | 0.12 | 0.50 | 0.13 | 10  |
| 1 F33H2.3    | 82  | 16 | 6  | 16856  | 1.28 | 0.26 | 0.49 | 0.17 | 39  |
| 10 F35A5.1   | 36  | 17 | 1  | 62237  | 3.68 | 0.00 | 0.05 | 0.66 | 4   |
| 7 F35C5.6    | 191 | 13 | 11 | 55414  | 0.96 | 0.45 | 0.52 | 0.16 | 89  |
| 10 F35C5.6   | 138 | 8  | 7  | 35043  | 1.01 | 0.48 | 0.51 | 0.14 | 58  |
| 22 F35C5.6   | 193 | 7  | 6  | 31663  | 0.96 | 0.43 | 0.52 | 0.12 | 57  |
| 1 F35C5.6    | 35  | 4  | 2  | 4342   | 0.57 | 0.07 | 0.40 | 0.25 | 13  |
| 22 F35D11.4  | 30  | 5  | 3  | 29371  | 1.41 | 0.20 | 0.53 | 0.17 | 21  |
| 1 F35D11.4   | 12  | 2  | 1  | 7279   | 1.92 | 0.04 | 0.30 | 0.27 | 6   |
| 10 F35D11.4  | 28  | 4  | 1  | 17541  | 1.79 | 0.11 | 0.48 | 0.19 | 8   |
| 10 F35E8.8   | 40  | 2  | 1  | 5495   | 0.67 | 0.12 | 0.49 | 0.20 | 9   |
| 22 F35G12.10 | 39  | 6  | 1  | 19552  | 1.96 | 0.05 | 0.29 | 0.23 | 7   |
| 22 F35G12.12 | 39  | 2  | 1  | 11559  | 0.63 | 0.05 | 0.29 | 0.07 | 7   |
| 22 F35G12.2  | 50  | 4  | 2  | 29531  | 0.98 | 0.47 | 0.51 | 0.14 | 23  |
| 10 F35G12.2  | 35  | 3  | 1  | 32478  | 2.32 | 0.04 | 0.28 | 0.21 | 11  |
| 1 F35G2.2    | 211 | 9  | 5  | 75917  | 1.64 | 0.09 | 0.46 | 0.19 | 43  |
| 22 F35G2.2   | 225 | 9  | 4  | 60473  | 1.32 | 0.25 | 0.54 | 0.19 | 42  |
| 10 F35G2.2   | 189 | 9  | 1  | 60710  | 1.21 | 0.36 | 0.52 | 0.31 | 8   |
| 10 F35G2.4   | 60  | 6  | 3  | 36659  | 0.71 | 0.15 | 0.49 | 0.19 | 31  |
| 22 F35G2.4   | 85  | 2  | 2  | 13913  | 1.73 | 0.09 | 0.41 | 0.17 | 26  |
| 10 F36H1.6   | 382 | 27 | 23 | 65907  | 1.32 | 0.30 | 0.51 | 0.18 | 191 |
| 22 F36H1.6   | 439 | 28 | 10 | 82699  | 1.23 | 0.31 | 0.53 | 0.24 | 72  |
| 1 F36H1.6    | 96  | 3  | 2  | 2430   | 1.46 | 0.16 | 0.49 | 0.12 | 16  |
| 22 F37B1.1   | 98  | 4  | 2  | 8898   | 0.63 | 0.05 | 0.30 | 0.17 | 10  |
| 10 F37B1.1   | 90  | 3  | 1  | 8681   | 1.10 | 0.44 | 0.51 | 0.17 | 10  |
| 22 F37B12.2  | 46  | 6  | 1  | 12840  | 0.93 | 0.39 | 0.54 | 0.18 | 7   |

|                      |      |    |    |        |      |      |      |      |     |
|----------------------|------|----|----|--------|------|------|------|------|-----|
| 10 F37B12.2          | 65   | 8  | 1  | 26027  | 0.60 | 0.07 | 0.42 | 0.19 | 9   |
| 10 F37C4.5a          | 1344 | 40 | 39 | 214472 | 0.96 | 0.42 | 0.51 | 0.17 | 353 |
| 22 F37C4.5a          | 1138 | 44 | 37 | 473513 | 0.98 | 0.46 | 0.51 | 0.19 | 326 |
| 7 F37C4.5a           | 905  | 37 | 32 | 202129 | 1.04 | 0.47 | 0.51 | 0.16 | 291 |
| 1 F37C4.5a;F37C4.5b  | 671  | 28 | 18 | 58620  | 0.85 | 0.32 | 0.51 | 0.15 | 176 |
| 10 F37E3.1           | 22   | 6  | 2  | 27112  | 2.38 | 0.03 | 0.27 | 0.15 | 13  |
| 22 F37E3.1           | 96   | 5  | 1  | 5917   | 1.23 | 0.31 | 0.53 | 0.16 | 7   |
| 22 F37H8.5           | 258  | 17 | 7  | 103994 | 0.95 | 0.42 | 0.53 | 0.20 | 62  |
| 1 F37H8.5            | 244  | 12 | 6  | 60910  | 1.13 | 0.39 | 0.52 | 0.10 | 52  |
| 10 F37H8.5           | 181  | 12 | 5  | 108101 | 1.14 | 0.41 | 0.51 | 0.14 | 52  |
| 7 F37H8.5            | 114  | 8  | 2  | 43538  | 1.01 | 0.50 | 0.50 | 0.08 | 13  |
| 1 F38B2.4a           | 210  | 8  | 5  | 17128  | 1.34 | 0.22 | 0.50 | 0.21 | 41  |
| 22 F38B2.4a          | 238  | 7  | 5  | 28699  | 1.03 | 0.48 | 0.51 | 0.15 | 58  |
| 7 F38B2.4a           | 136  | 3  | 3  | 11175  | 0.78 | 0.24 | 0.54 | 0.12 | 32  |
| 10 F38B2.4a          | 136  | 2  | 2  | 4376   | 0.75 | 0.19 | 0.49 | 0.18 | 28  |
| 22 F38E11.3          | 14   | 4  | 1  | 5677   | 1.00 | 0.49 | 0.51 | 0.21 | 4   |
| 22 F38H4.8b;F38H4.8a | 53   | 5  | 4  | 10619  | 0.87 | 0.31 | 0.54 | 0.13 | 20  |
| 10 F39C12.1          | 44   | 16 | 1  | 58595  | 0.28 | 0.00 | 0.01 | 0.55 | 4   |
| 22 F39C12.1          | 98   | 11 | 1  | 27461  | 3.94 | 0.00 | 0.01 | 0.15 | 4   |
| 1 F39C12.1;ZC53.2    | 29   | 12 | 2  | 12739  | 1.72 | 0.07 | 0.41 | 0.17 | 9   |
| 7 F39H11.5           | 24   | 6  | 3  | 19234  | 1.02 | 0.49 | 0.51 | 0.17 | 22  |
| 1 F39H11.5           | 94   | 3  | 1  | 24431  | 0.80 | 0.27 | 0.49 | 0.06 | 14  |
| 10 F40A3.3a;F40A3.3b | 65   | 5  | 2  | 41717  | 0.78 | 0.23 | 0.50 | 0.66 | 12  |
| 7 F40A3.3b;F40A3.3a  | 143  | 3  | 3  | 20779  | 0.98 | 0.47 | 0.51 | 0.10 | 35  |
| 22 F40A3.3b;F40A3.3a | 28   | 2  | 1  | 11075  | 0.19 | 0.00 | 0.00 | 0.26 | 6   |
| 10 F40F4.6           | 140  | 4  | 4  | 8235   | 0.75 | 0.19 | 0.48 | 0.15 | 41  |
| 22 F40F4.6           | 66   | 4  | 2  | 7082   | 1.11 | 0.41 | 0.53 | 0.16 | 23  |
| 22 F40F8.10          | 662  | 54 | 27 | 893206 | 1.22 | 0.32 | 0.54 | 0.16 | 217 |
| 10 F40F8.10          | 610  | 46 | 23 | 582070 | 1.41 | 0.25 | 0.50 | 0.24 | 158 |
| 1 F40F8.10           | 339  | 24 | 14 | 113743 | 1.04 | 0.48 | 0.50 | 0.14 | 111 |
| 7 F40F8.10           | 193  | 14 | 7  | 85724  | 1.21 | 0.32 | 0.54 | 0.14 | 48  |
| 10 F40F9.6a;F40F9.6b | 391  | 24 | 20 | 86834  | 0.75 | 0.19 | 0.49 | 0.17 | 184 |
| 22 F40F9.6a;F40F9.6b | 636  | 40 | 13 | 123703 | 2.57 | 0.01 | 0.13 | 0.39 | 60  |
| 1 F40F9.6a;F40F9.6b  | 151  | 15 | 6  | 17253  | 2.22 | 0.02 | 0.22 | 0.16 | 34  |

|                                        |      |    |    |         |      |      |      |      |     |
|----------------------------------------|------|----|----|---------|------|------|------|------|-----|
| 7 F40F9.6a;F40F9.6b                    | 107  | 7  | 3  | 24096   | 2.13 | 0.03 | 0.29 | 0.20 | 26  |
| 1 F40G9.3                              | 86   | 2  | 1  | 4433    | 1.36 | 0.21 | 0.50 | 0.16 | 7   |
| 22 F41C3.3                             | 15   | 9  | 1  | 66583   | 1.56 | 0.14 | 0.49 | 0.18 | 5   |
| 7 F41C3.5                              | 118  | 16 | 8  | 60881   | 1.14 | 0.38 | 0.52 | 0.15 | 69  |
| 10 F41C3.5                             | 68   | 7  | 4  | 42974   | 1.14 | 0.42 | 0.51 | 0.11 | 36  |
| 22 F41C3.5                             | 157  | 10 | 4  | 38172   | 1.54 | 0.14 | 0.49 | 0.14 | 33  |
| 1 F41C3.5                              | 112  | 6  | 3  | 15910   | 1.57 | 0.12 | 0.50 | 0.16 | 30  |
| 22 F42A10.1                            | 19   | 2  | 2  | 4390    | 0.75 | 0.15 | 0.49 | 0.17 | 21  |
| 10 F42C5.8                             | 208  | 22 | 16 | 151384  | 1.61 | 0.16 | 0.50 | 0.16 | 121 |
| 1 F42C5.8                              | 111  | 13 | 9  | 67019   | 0.62 | 0.10 | 0.46 | 0.14 | 72  |
| 7 F42C5.8                              | 81   | 12 | 7  | 51940   | 1.10 | 0.41 | 0.51 | 0.15 | 44  |
| 22 F42C5.8                             | 89   | 16 | 2  | 347681  | 2.94 | 0.00 | 0.07 | 0.11 | 17  |
| 10 F42G9.1a                            | 22   | 6  | 1  | 25719   | 1.82 | 0.11 | 0.48 | 0.20 | 8   |
| 10 F43E2.5                             | 1042 | 24 | 18 | 133510  | 1.92 | 0.09 | 0.47 | 0.15 | 215 |
| 22 F43E2.5                             | 474  | 18 | 15 | 83541   | 0.99 | 0.47 | 0.51 | 0.15 | 140 |
| 1 F43E2.5                              | 199  | 12 | 9  | 30346   | 1.18 | 0.35 | 0.51 | 0.15 | 73  |
| 7 F43E2.5                              | 314  | 9  | 8  | 31206   | 0.44 | 0.01 | 0.17 | 0.23 | 42  |
| 1 F43E2.8                              | 994  | 62 | 15 | 392461  | 0.69 | 0.16 | 0.48 | 0.18 | 135 |
| 10 F43E2.8                             | 708  | 42 | 9  | 1188600 | 1.01 | 0.47 | 0.51 | 0.14 | 101 |
| 22 F43E2.8                             | 702  | 56 | 7  | 1265660 | 0.94 | 0.40 | 0.54 | 0.15 | 71  |
| 7 F43E2.8                              | 915  | 52 | 4  | 172829  | 0.97 | 0.46 | 0.51 | 0.13 | 54  |
| 10 F43G9.1                             | 357  | 18 | 12 | 123798  | 0.92 | 0.38 | 0.52 | 0.14 | 123 |
| 7 F43G9.1                              | 229  | 12 | 11 | 42819   | 0.69 | 0.16 | 0.50 | 0.18 | 93  |
| 1 F43G9.1                              | 192  | 14 | 9  | 34498   | 0.75 | 0.21 | 0.50 | 0.16 | 83  |
| 22 F43G9.1                             | 216  | 12 | 9  | 58889   | 0.92 | 0.38 | 0.55 | 0.17 | 89  |
| 10 F43G9.5                             | 64   | 2  | 2  | 3426    | 1.78 | 0.12 | 0.48 | 0.11 | 19  |
| 22 F43G9.5                             | 66   | 2  | 2  | 3772    | 0.98 | 0.46 | 0.51 | 0.15 | 17  |
| 7 F44C4.3                              | 614  | 22 | 18 | 137619  | 1.73 | 0.09 | 0.45 | 0.12 | 176 |
| 10 F44C4.3                             | 892  | 23 | 17 | 278003  | 1.46 | 0.22 | 0.49 | 0.12 | 173 |
| 1 F44C4.3                              | 571  | 18 | 10 | 158491  | 1.98 | 0.03 | 0.30 | 0.12 | 91  |
| 22 F44C4.3                             | 613  | 17 | 10 | 234738  | 1.56 | 0.14 | 0.49 | 0.09 | 99  |
| 10 F44E7.4a;F44E7.4b;F44E7.4c;F44E7.4d | 770  | 62 | 44 | 325085  | 0.99 | 0.45 | 0.51 | 0.17 | 336 |
| 22 F44E7.4a;F44E7.4b;F44E7.4c;F44E7.4d | 610  | 53 | 41 | 196492  | 1.72 | 0.09 | 0.41 | 0.16 | 299 |
| 1 F44E7.4a;F44E7.4b;F44E7.4c;F44E7.4d  | 394  | 38 | 28 | 112357  | 1.55 | 0.12 | 0.50 | 0.17 | 225 |

|                                                     |      |     |     |          |      |      |      |      |      |
|-----------------------------------------------------|------|-----|-----|----------|------|------|------|------|------|
| 7 F44E7.4a;F44E7.4b;F44E7.4d                        | 174  | 44  | 24  | 86845    | 1.22 | 0.32 | 0.54 | 0.14 | 206  |
| 10 F44F4.11                                         | 458  | 37  | 2   | 397976   | 3.00 | 0.01 | 0.12 | 0.18 | 14   |
| 1 F44F4.11                                          | 312  | 33  | 1   | 139995   | 1.33 | 0.23 | 0.50 | 0.14 | 10   |
| 10 F44G3.2                                          | 273  | 19  | 6   | 152797   | 0.39 | 0.00 | 0.06 | 0.30 | 42   |
| 22 F44G3.2                                          | 309  | 15  | 5   | 156096   | 1.04 | 0.47 | 0.51 | 0.10 | 53   |
| 1 F44G3.2                                           | 37   | 9   | 1   | 30059    | 0.98 | 0.46 | 0.50 | 0.12 | 5    |
| 7 F44G3.2                                           | 71   | 9   | 1   | 53729    | 0.99 | 0.48 | 0.50 | 0.10 | 7    |
| 7 F45D11.14;F45D11.15;F45D11.16                     | 422  | 38  | 22  | 122236   | 1.55 | 0.14 | 0.49 | 0.14 | 215  |
| 22 F45D11.14;F45D11.15;F45D11.16                    | 495  | 36  | 22  | 203864   | 1.38 | 0.22 | 0.54 | 0.16 | 210  |
| 10 F45D11.14;F45D11.15;F45D11.16                    | 498  | 32  | 18  | 172477   | 0.53 | 0.03 | 0.27 | 0.14 | 172  |
| 1 F45D11.14;F45D11.15;F45D11.16                     | 158  | 25  | 13  | 87948    | 1.96 | 0.04 | 0.30 | 0.17 | 103  |
| 7 F45E10.1a;F45E10.1c;F45E10.1g;F45E10.1h;F45E10.1i | 14   | 5   | 1   | 5895     | 0.97 | 0.46 | 0.52 | 0.21 | 5    |
| 1 F45E4.2                                           | 286  | 13  | 10  | 41543    | 1.47 | 0.15 | 0.50 | 0.16 | 111  |
| 22 F45E4.2                                          | 371  | 26  | 10  | 123393   | 1.75 | 0.08 | 0.39 | 0.20 | 77   |
| 10 F45E4.2                                          | 132  | 13  | 8   | 82495    | 1.52 | 0.20 | 0.49 | 0.15 | 82   |
| 7 F45E4.2                                           | 152  | 11  | 2   | 33425    | 0.66 | 0.13 | 0.47 | 0.15 | 18   |
| 22 F45H10.1                                         | 54   | 10  | 3   | 77388    | 0.90 | 0.35 | 0.55 | 0.13 | 23   |
| 22 F46A9.5                                          | 44   | 2   | 1   | 5742     | 0.18 | 0.00 | 0.00 | 0.39 | 5    |
| 10 F46E10.10a                                       | 3598 | 88  | 75  | 1001080  | 0.77 | 0.21 | 0.49 | 0.18 | 806  |
| 7 F46E10.10a                                        | 2433 | 65  | 57  | 447463   | 1.17 | 0.35 | 0.52 | 0.17 | 592  |
| 22 F46E10.10a;F46E10.10b                            | 2805 | 71  | 58  | 785263   | 0.93 | 0.39 | 0.55 | 0.17 | 646  |
| 1 F46E10.10a;F46E10.10b                             | 1984 | 62  | 34  | 197588   | 0.98 | 0.46 | 0.50 | 0.21 | 304  |
| 1 F46F11.2                                          | 335  | 17  | 12  | 57797    | 1.31 | 0.25 | 0.49 | 0.13 | 117  |
| 10 F46F11.2                                         | 263  | 14  | 9   | 113534   | 1.47 | 0.22 | 0.50 | 0.12 | 91   |
| 7 F46F11.2                                          | 173  | 8   | 5   | 49805    | 1.33 | 0.25 | 0.54 | 0.12 | 50   |
| 22 F46F11.2                                         | 227  | 9   | 5   | 58097    | 1.31 | 0.26 | 0.55 | 0.11 | 60   |
| 7 F46H5.3b                                          | 5143 | 276 | 223 | 9799870  | 0.87 | 0.34 | 0.53 | 0.15 | 1989 |
| 22 F46H5.3b                                         | 4297 | 266 | 220 | 10952700 | 0.95 | 0.42 | 0.53 | 0.14 | 1938 |
| 10 F46H5.3b                                         | 5187 | 285 | 208 | 8295240  | 0.75 | 0.19 | 0.49 | 0.18 | 1631 |
| 1 F46H5.3b                                          | 3797 | 214 | 170 | 3480340  | 0.90 | 0.38 | 0.52 | 0.15 | 1481 |
| 22 F47B10.1                                         | 31   | 4   | 1   | 10458    | 1.85 | 0.06 | 0.34 | 0.27 | 6    |
| 22 F48E3.3                                          | 29   | 15  | 3   | 174592   | 1.11 | 0.40 | 0.54 | 0.23 | 19   |
| 1 F48E3.3                                           | 36   | 12  | 3   | 35256    | 1.82 | 0.05 | 0.34 | 0.20 | 17   |
| 7 F48E3.3                                           | 79   | 13  | 3   | 72001    | 1.45 | 0.18 | 0.52 | 0.23 | 20   |

|                        |     |    |    |        |      |      |      |      |     |
|------------------------|-----|----|----|--------|------|------|------|------|-----|
| 10 F48E3.3             | 31  | 9  | 2  | 55928  | 1.53 | 0.19 | 0.48 | 0.09 | 14  |
| 7 F48E8.3              | 295 | 28 | 9  | 61020  | 0.88 | 0.36 | 0.52 | 0.12 | 70  |
| 10 F48E8.3             | 272 | 16 | 8  | 61082  | 0.79 | 0.24 | 0.50 | 0.22 | 67  |
| 1 F48E8.3              | 329 | 15 | 6  | 57966  | 0.95 | 0.43 | 0.52 | 0.12 | 59  |
| 22 F48E8.3             | 205 | 15 | 5  | 49551  | 0.85 | 0.27 | 0.55 | 0.17 | 48  |
| 10 F48E8.5             | 262 | 11 | 9  | 54683  | 0.46 | 0.01 | 0.17 | 0.23 | 74  |
| 22 F48E8.5             | 191 | 9  | 6  | 25405  | 0.65 | 0.06 | 0.33 | 0.16 | 44  |
| 1 F48E8.5              | 25  | 5  | 1  | 4598   | 0.40 | 0.01 | 0.15 | 0.28 | 8   |
| 10 F48E8.6             | 23  | 9  | 2  | 324529 | 1.28 | 0.32 | 0.51 | 0.15 | 11  |
| 22 F48E8.6             | 42  | 7  | 1  | 82387  | 0.22 | 0.00 | 0.00 | 0.52 | 6   |
| 22 F49C12.8            | 120 | 9  | 6  | 56561  | 0.80 | 0.21 | 0.53 | 0.19 | 42  |
| 7 F49C12.8             | 205 | 6  | 4  | 19044  | 0.81 | 0.28 | 0.55 | 0.12 | 41  |
| 10 F49E8.3a            | 413 | 33 | 28 | 67372  | 1.15 | 0.40 | 0.51 | 0.16 | 201 |
| 22 F49E8.3a            | 389 | 36 | 19 | 99740  | 1.00 | 0.49 | 0.51 | 0.16 | 126 |
| 1 F49E8.3a             | 86  | 13 | 6  | 20773  | 0.92 | 0.40 | 0.52 | 0.16 | 30  |
| 10 F52B10.1            | 57  | 11 | 9  | 104358 | 0.81 | 0.26 | 0.50 | 0.20 | 62  |
| 22 F52B10.1            | 92  | 16 | 8  | 32759  | 1.17 | 0.35 | 0.55 | 0.12 | 55  |
| 7 F52B10.1             | 20  | 5  | 3  | 7921   | 0.78 | 0.25 | 0.54 | 0.23 | 18  |
| 1 F52B10.1             | 25  | 3  | 1  | 58784  | 1.39 | 0.20 | 0.50 | 0.02 | 4   |
| 22 F52B11.2b;F52B11.2a | 70  | 6  | 3  | 15446  | 0.87 | 0.30 | 0.54 | 0.10 | 12  |
| 7 F52B11.2b;F52B11.2a  | 18  | 5  | 1  | 15762  | 0.30 | 0.00 | 0.01 | 0.33 | 6   |
| 22 F52D1.1             | 463 | 51 | 24 | 149942 | 2.06 | 0.04 | 0.27 | 0.36 | 119 |
| 10 F52D1.1             | 253 | 28 | 20 | 84951  | 1.16 | 0.40 | 0.51 | 0.16 | 160 |
| 1 F52D1.1              | 76  | 24 | 14 | 26924  | 0.64 | 0.12 | 0.50 | 0.18 | 82  |
| 7 F52D1.1              | 69  | 15 | 8  | 40076  | 0.51 | 0.03 | 0.28 | 0.18 | 58  |
| 10 F52D10.3a;F52D10.3b | 861 | 30 | 28 | 758349 | 1.09 | 0.46 | 0.51 | 0.12 | 253 |
| 22 F52D10.3a;F52D10.3b | 782 | 38 | 26 | 490258 | 1.11 | 0.41 | 0.53 | 0.16 | 216 |
| 1 F52D10.3a;F52D10.3b  | 630 | 27 | 15 | 365848 | 1.18 | 0.34 | 0.51 | 0.12 | 134 |
| 7 F52D10.3a;F52D10.3b  | 446 | 28 | 14 | 186057 | 1.64 | 0.11 | 0.48 | 0.12 | 113 |
| 7 F52E4.1a;F52E4.1b    | 366 | 26 | 21 | 96588  | 1.16 | 0.37 | 0.52 | 0.14 | 153 |
| 22 F52E4.1a;F52E4.1b   | 660 | 27 | 16 | 117644 | 0.53 | 0.01 | 0.14 | 0.21 | 98  |
| 10 F52E4.1b;F52E4.1a   | 639 | 28 | 17 | 134328 | 1.04 | 0.49 | 0.50 | 0.21 | 97  |
| 1 F52E4.1b;F52E4.1a    | 434 | 15 | 10 | 66674  | 1.87 | 0.05 | 0.32 | 0.24 | 56  |
| 10 F52H3.7a            | 133 | 15 | 7  | 37579  | 0.89 | 0.34 | 0.51 | 0.16 | 50  |

|                     |      |     |     |         |      |      |      |      |     |
|---------------------|------|-----|-----|---------|------|------|------|------|-----|
| 22 F52H3.7a         | 54   | 9   | 3   | 10408   | 1.31 | 0.25 | 0.55 | 0.22 | 16  |
| 1 F52H3.7a;F52H3.7b | 58   | 6   | 3   | 5719    | 1.05 | 0.47 | 0.50 | 0.13 | 14  |
| 1 F53A2.4           | 64   | 6   | 1   | 5987    | 1.15 | 0.37 | 0.51 | 0.11 | 4   |
| 7 F53A2.6a          | 19   | 2   | 1   | 4504    | 0.88 | 0.36 | 0.53 | 0.09 | 7   |
| 22 F53A2.7          | 949  | 28  | 26  | 224475  | 0.96 | 0.44 | 0.52 | 0.15 | 212 |
| 7 F53A2.7           | 840  | 18  | 17  | 72864   | 1.28 | 0.27 | 0.56 | 0.15 | 148 |
| 10 F53A2.7          | 709  | 26  | 16  | 135678  | 1.05 | 0.48 | 0.51 | 0.14 | 139 |
| 1 F53A2.7           | 942  | 27  | 15  | 45880   | 1.17 | 0.36 | 0.51 | 0.13 | 117 |
| 1 F53C11.3          | 56   | 8   | 1   | 19193   | 0.29 | 0.00 | 0.03 | 0.11 | 5   |
| 1 F53F1.2           | 223  | 8   | 6   | 17692   | 1.01 | 0.49 | 0.49 | 0.15 | 58  |
| 10 F53F1.2          | 153  | 8   | 4   | 62155   | 1.01 | 0.48 | 0.51 | 0.12 | 53  |
| 7 F53F1.2           | 185  | 6   | 2   | 16272   | 0.88 | 0.35 | 0.53 | 0.20 | 13  |
| 10 F53F1.3          | 114  | 10  | 8   | 28980   | 0.73 | 0.17 | 0.49 | 0.22 | 68  |
| 22 F53F1.3          | 138  | 11  | 4   | 26808   | 0.96 | 0.43 | 0.52 | 0.20 | 18  |
| 1 F53F1.3           | 59   | 7   | 2   | 12082   | 0.79 | 0.26 | 0.50 | 0.13 | 11  |
| 7 F53F1.3           | 31   | 3   | 1   | 7390    | 0.80 | 0.27 | 0.56 | 0.19 | 5   |
| 7 F53F10.4          | 29   | 2   | 1   | 2827    | 1.13 | 0.39 | 0.52 | 0.16 | 4   |
| 22 F53F10.4         | 89   | 2   | 1   | 3776    | 1.14 | 0.38 | 0.55 | 0.17 | 6   |
| 22 F53G12.1         | 191  | 6   | 4   | 23147   | 0.82 | 0.24 | 0.53 | 0.20 | 38  |
| 10 F53G12.1         | 206  | 9   | 3   | 40195   | 0.82 | 0.26 | 0.51 | 0.14 | 27  |
| 22 F53G12.10        | 747  | 57  | 45  | 942370  | 0.93 | 0.39 | 0.54 | 0.19 | 319 |
| 10 F53G12.10        | 615  | 45  | 30  | 1194180 | 0.97 | 0.43 | 0.51 | 0.13 | 259 |
| 1 F53G12.10         | 388  | 36  | 29  | 401533  | 0.68 | 0.15 | 0.49 | 0.14 | 217 |
| 7 F53G12.10         | 484  | 38  | 18  | 245012  | 0.81 | 0.28 | 0.56 | 0.20 | 102 |
| 7 F54A3.3           | 867  | 38  | 23  | 171454  | 1.13 | 0.39 | 0.52 | 0.16 | 196 |
| 22 F54A3.3          | 1129 | 43  | 22  | 286367  | 0.99 | 0.48 | 0.51 | 0.14 | 221 |
| 10 F54A3.3          | 1151 | 44  | 22  | 270709  | 1.68 | 0.14 | 0.49 | 0.16 | 206 |
| 1 F54A3.3           | 564  | 38  | 14  | 130001  | 1.32 | 0.24 | 0.50 | 0.19 | 99  |
| 7 F54C1.7           | 27   | 4   | 2   | 12786   | 0.72 | 0.18 | 0.52 | 0.15 | 19  |
| 10 F54C1.7          | 116  | 4   | 2   | 25008   | 0.65 | 0.10 | 0.48 | 0.30 | 11  |
| 10 F54C9.5          | 3602 | 131 | 108 | 1583620 | 1.52 | 0.20 | 0.49 | 0.13 | 935 |
| 22 F54C9.5          | 3625 | 139 | 106 | 1302090 | 1.34 | 0.24 | 0.53 | 0.16 | 904 |
| 1 F54C9.5           | 2371 | 94  | 80  | 909527  | 1.29 | 0.26 | 0.50 | 0.16 | 641 |
| 7 F54C9.5           | 1810 | 74  | 62  | 586524  | 1.58 | 0.13 | 0.47 | 0.14 | 567 |

|                        |      |     |     |         |      |      |      |      |      |
|------------------------|------|-----|-----|---------|------|------|------|------|------|
| 22 F54D11.1            | 1275 | 81  | 47  | 1204490 | 0.77 | 0.17 | 0.50 | 0.18 | 439  |
| 7 F54D11.1             | 324  | 51  | 25  | 344434  | 0.78 | 0.24 | 0.55 | 0.18 | 202  |
| 10 F54D11.1            | 434  | 45  | 24  | 705602  | 1.74 | 0.13 | 0.49 | 0.18 | 177  |
| 1 F54D11.1             | 434  | 51  | 1   | 492325  | 0.23 | 0.00 | 0.01 | 0.48 | 5    |
| 10 F54D5.12            | 30   | 5   | 2   | 23427   | 1.16 | 0.40 | 0.51 | 0.13 | 15   |
| 22 F54D5.12            | 56   | 4   | 1   | 17838   | 1.07 | 0.44 | 0.52 | 0.24 | 13   |
| 22 F54D5.7             | 80   | 17  | 4   | 84345   | 0.56 | 0.02 | 0.22 | 0.32 | 27   |
| 7 F54D5.7              | 37   | 4   | 2   | 10938   | 1.33 | 0.24 | 0.54 | 0.28 | 15   |
| 10 F54D8.3a;F54D8.3b   | 1244 | 47  | 39  | 220200  | 0.83 | 0.27 | 0.51 | 0.17 | 306  |
| 22 F54D8.3a;F54D8.3b   | 1117 | 47  | 38  | 207975  | 0.81 | 0.23 | 0.54 | 0.16 | 367  |
| 1 F54D8.3a;F54D8.3b    | 549  | 26  | 25  | 47778   | 0.92 | 0.40 | 0.52 | 0.16 | 192  |
| 7 F54D8.3a;F54D8.3b    | 643  | 26  | 23  | 73440   | 0.98 | 0.46 | 0.51 | 0.18 | 195  |
| 7 F54E4.1              | 23   | 6   | 1   | 15974   | 0.54 | 0.05 | 0.34 | 0.08 | 4    |
| 22 F54F3.4             | 68   | 6   | 2   | 29081   | 0.97 | 0.45 | 0.52 | 0.15 | 17   |
| 1 F54F3.4              | 33   | 6   | 1   | 79437   | 0.67 | 0.14 | 0.49 | 0.19 | 8    |
| 22 F54H12.1a;F54H12.1b | 2335 | 124 | 114 | 1007860 | 1.10 | 0.41 | 0.53 | 0.14 | 1061 |
| 10 F54H12.1a;F54H12.1b | 2632 | 111 | 104 | 941573  | 0.94 | 0.40 | 0.51 | 0.16 | 995  |
| 1 F54H12.1a;F54H12.1b  | 2256 | 143 | 103 | 499936  | 0.97 | 0.45 | 0.50 | 0.18 | 877  |
| 7 F54H12.1a;F54H12.1b  | 1845 | 132 | 85  | 351725  | 1.27 | 0.28 | 0.55 | 0.17 | 723  |
| 10 F54H12.6            | 1117 | 41  | 10  | 328635  | 0.63 | 0.09 | 0.47 | 0.16 | 93   |
| 22 F54H12.6            | 1083 | 40  | 6   | 274699  | 1.08 | 0.43 | 0.52 | 0.15 | 64   |
| 1 F54H12.6             | 109  | 12  | 4   | 42801   | 0.98 | 0.46 | 0.50 | 0.15 | 33   |
| 7 F54H12.6             | 233  | 15  | 4   | 72268   | 0.87 | 0.34 | 0.53 | 0.29 | 35   |
| 22 F55B11.1            | 654  | 48  | 31  | 108695  | 1.76 | 0.08 | 0.39 | 0.31 | 171  |
| 10 F55B11.1            | 627  | 30  | 25  | 85327   | 0.60 | 0.07 | 0.42 | 0.15 | 221  |
| 7 F55B11.1             | 210  | 20  | 18  | 29264   | 0.64 | 0.11 | 0.47 | 0.16 | 134  |
| 1 F55B11.1             | 562  | 21  | 17  | 35406   | 1.00 | 0.48 | 0.50 | 0.16 | 148  |
| 22 F55B11.2            | 225  | 4   | 2   | 6577    | 0.64 | 0.06 | 0.32 | 0.24 | 13   |
| 10 F55C5.5             | 255  | 8   | 4   | 25409   | 1.00 | 0.46 | 0.51 | 0.15 | 28   |
| 22 F55C5.5             | 102  | 4   | 3   | 27243   | 1.45 | 0.18 | 0.51 | 0.14 | 29   |
| 1 F55C5.5              | 109  | 5   | 3   | 31060   | 1.68 | 0.08 | 0.44 | 0.15 | 19   |
| 7 F55C5.5              | 86   | 2   | 1   | 7764    | 0.72 | 0.18 | 0.53 | 0.19 | 9    |
| 1 F55C5.8              | 21   | 4   | 1   | 5964    | 0.63 | 0.11 | 0.50 | 0.18 | 7    |
| 10 F55C5.8             | 33   | 8   | 1   | 30121   | 1.61 | 0.16 | 0.50 | 0.14 | 8    |

|                                            |     |    |    |        |      |      |      |      |     |
|--------------------------------------------|-----|----|----|--------|------|------|------|------|-----|
| 10 F55D10.1                                | 20  | 5  | 2  | 10871  | 0.93 | 0.39 | 0.52 | 0.26 | 14  |
| 7 F55D10.1                                 | 76  | 2  | 2  | 4639   | 1.08 | 0.43 | 0.51 | 0.13 | 18  |
| 22 F55D10.1                                | 32  | 3  | 1  | 7029   | 1.73 | 0.09 | 0.40 | 0.10 | 8   |
| 22 F55F10.1                                | 47  | 5  | 1  | 33049  | 1.29 | 0.27 | 0.55 | 0.16 | 7   |
| 22 F55H2.2                                 | 302 | 16 | 11 | 31717  | 1.13 | 0.38 | 0.55 | 0.17 | 75  |
| 7 F55H2.2                                  | 191 | 9  | 5  | 32901  | 0.55 | 0.05 | 0.35 | 0.20 | 42  |
| 10 F55H2.2                                 | 173 | 7  | 3  | 39427  | 1.35 | 0.28 | 0.51 | 0.15 | 30  |
| 1 F55H2.2                                  | 123 | 6  | 2  | 10980  | 0.56 | 0.07 | 0.39 | 0.16 | 17  |
| 22 F55H2.6                                 | 352 | 29 | 22 | 147456 | 1.28 | 0.28 | 0.54 | 0.20 | 189 |
| 10 F55H2.6                                 | 177 | 21 | 16 | 106268 | 1.12 | 0.43 | 0.51 | 0.13 | 127 |
| 1 F55H2.6                                  | 149 | 12 | 9  | 29357  | 1.31 | 0.24 | 0.50 | 0.16 | 79  |
| 7 F55H2.6                                  | 141 | 10 | 8  | 28222  | 1.01 | 0.50 | 0.50 | 0.16 | 74  |
| 1 F56B3.5                                  | 252 | 12 | 9  | 43437  | 0.94 | 0.42 | 0.52 | 0.18 | 73  |
| 22 F56B3.5                                 | 493 | 18 | 9  | 107877 | 1.04 | 0.47 | 0.51 | 0.15 | 60  |
| 10 F56B3.5                                 | 276 | 14 | 7  | 109130 | 0.73 | 0.17 | 0.49 | 0.14 | 64  |
| 7 F56B3.5                                  | 44  | 9  | 4  | 23590  | 1.00 | 0.50 | 0.50 | 0.18 | 24  |
| 22 F56D12.1a;F56D12.1b;F56D12.1d           | 156 | 19 | 14 | 76059  | 1.01 | 0.50 | 0.50 | 0.16 | 101 |
| 10 F56D12.1b;F56D12.1a;F56D12.1d;F56D12.1c | 214 | 21 | 17 | 163955 | 0.88 | 0.33 | 0.51 | 0.15 | 147 |
| 1 F56D12.1b;F56D12.1c                      | 58  | 10 | 6  | 27333  | 1.18 | 0.35 | 0.51 | 0.14 | 30  |
| 22 F56D12.5a                               | 534 | 10 | 9  | 89821  | 0.71 | 0.11 | 0.46 | 0.13 | 102 |
| 10 F56D12.5a                               | 290 | 7  | 7  | 27411  | 1.61 | 0.16 | 0.49 | 0.18 | 73  |
| 1 F56D12.5a                                | 347 | 11 | 6  | 24634  | 0.77 | 0.24 | 0.50 | 0.17 | 59  |
| 7 F56D12.5a;F56D12.5b                      | 211 | 5  | 4  | 45714  | 0.81 | 0.27 | 0.56 | 0.16 | 44  |
| 22 F56D2.1                                 | 461 | 13 | 13 | 64544  | 1.02 | 0.48 | 0.51 | 0.14 | 122 |
| 7 F56D2.1                                  | 67  | 3  | 3  | 5434   | 1.32 | 0.25 | 0.53 | 0.14 | 19  |
| 10 F56D2.1                                 | 122 | 5  | 3  | 8709   | 1.02 | 0.49 | 0.50 | 0.17 | 24  |
| 22 F56D5.2                                 | 24  | 4  | 1  | 8195   | 1.49 | 0.16 | 0.50 | 0.36 | 4   |
| 10 F56F3.5                                 | 755 | 75 | 58 | 902753 | 1.17 | 0.39 | 0.51 | 0.16 | 467 |
| 22 F56F3.5                                 | 768 | 82 | 48 | 568002 | 1.28 | 0.27 | 0.55 | 0.16 | 327 |
| 1 F56F3.5                                  | 411 | 56 | 32 | 391664 | 0.76 | 0.23 | 0.50 | 0.15 | 219 |
| 7 F56F3.5                                  | 312 | 31 | 25 | 184414 | 1.21 | 0.33 | 0.54 | 0.15 | 177 |
| 1 F56H1.4                                  | 52  | 9  | 3  | 13743  | 0.90 | 0.38 | 0.52 | 0.09 | 15  |
| 7 F56H1.4                                  | 60  | 21 | 3  | 41461  | 1.43 | 0.19 | 0.52 | 0.10 | 17  |
| 22 F56H1.4                                 | 95  | 10 | 2  | 27478  | 0.93 | 0.39 | 0.54 | 0.23 | 17  |

|                        |      |     |    |         |       |      |      |      |     |
|------------------------|------|-----|----|---------|-------|------|------|------|-----|
| 10 F56H1.4             | 55   | 12  | 1  | 24842   | 1.63  | 0.16 | 0.50 | 0.15 | 7   |
| 1 F57B10.11            | 100  | 3   | 1  | 28560   | 0.89  | 0.37 | 0.51 | 0.42 | 5   |
| 22 F57B10.3b;F57B10.3a | 160  | 19  | 8  | 38405   | 1.13  | 0.39 | 0.54 | 0.19 | 53  |
| 10 F57B10.3b;F57B10.3a | 186  | 16  | 8  | 66539   | 1.07  | 0.47 | 0.51 | 0.14 | 80  |
| 7 F57B10.3b;F57B10.3a  | 130  | 9   | 3  | 50428   | 1.11  | 0.40 | 0.52 | 0.18 | 19  |
| 1 F57B10.3b;F57B10.3a  | 71   | 5   | 1  | 6347    | 0.79  | 0.26 | 0.50 | 0.16 | 9   |
| 22 F57B9.10a;F57B9.10b | 145  | 5   | 4  | 18285   | 0.61  | 0.04 | 0.27 | 0.15 | 33  |
| 1 F57B9.10a;F57B9.10b  | 22   | 4   | 1  | 1502    | 0.44  | 0.02 | 0.22 | 0.10 | 5   |
| 10 F57B9.6a;F57B9.6b   | 322  | 12  | 9  | 66289   | 1.14  | 0.42 | 0.51 | 0.29 | 95  |
| 7 F57B9.6a;F57B9.6b    | 107  | 5   | 3  | 39178   | 1.50  | 0.16 | 0.50 | 0.20 | 30  |
| 22 F57B9.6a;F57B9.6b   | 196  | 6   | 3  | 58846   | 1.06  | 0.45 | 0.52 | 0.17 | 43  |
| 22 F57F5.1             | 32   | 2   | 1  | 10725   | 1.59  | 0.13 | 0.49 | 0.12 | 10  |
| 1 F58B3.5a             | 28   | 4   | 2  | 14495   | 0.56  | 0.07 | 0.39 | 0.16 | 16  |
| 7 F58B3.5a;F58B3.5b    | 27   | 2   | 1  | 6820    | 0.65  | 0.12 | 0.48 | 0.18 | 9   |
| 22 F58B4.5             | 178  | 9   | 6  | 14773   | 0.88  | 0.32 | 0.53 | 0.18 | 51  |
| 10 F58B4.5             | 133  | 3   | 1  | 3957    | 18.56 | 0.00 | 0.00 | 0.35 | 4   |
| 1 F58D5.1a;F58D5.1b    | 25   | 7   | 2  | 7726    | 1.14  | 0.38 | 0.52 | 0.13 | 10  |
| 22 F58G1.1             | 11   | 7   | 1  | 61513   | 2.62  | 0.01 | 0.13 | 0.05 | 4   |
| 1 F58G1.4              | 284  | 12  | 9  | 59050   | 1.34  | 0.23 | 0.50 | 0.17 | 76  |
| 22 F58G1.4             | 399  | 12  | 9  | 68592   | 1.13  | 0.38 | 0.55 | 0.09 | 90  |
| 7 F58G1.4              | 226  | 8   | 7  | 57895   | 1.27  | 0.28 | 0.55 | 0.11 | 62  |
| 10 F58G1.4             | 356  | 11  | 7  | 102092  | 1.30  | 0.31 | 0.51 | 0.11 | 74  |
| 10 F58H1.3a            | 42   | 7   | 2  | 27600   | 1.43  | 0.24 | 0.50 | 0.12 | 16  |
| 22 F58H1.3a            | 102  | 5   | 2  | 68602   | 0.96  | 0.44 | 0.52 | 0.19 | 13  |
| 1 F58H1.3a             | 35   | 4   | 1  | 10669   | 1.48  | 0.15 | 0.50 | 0.09 | 8   |
| 1 F59A2.3              | 106  | 7   | 6  | 34072   | 0.59  | 0.08 | 0.44 | 0.17 | 41  |
| 22 F59A2.3             | 184  | 8   | 6  | 59365   | 0.63  | 0.05 | 0.29 | 0.20 | 61  |
| 10 F59A2.3             | 146  | 7   | 5  | 96864   | 0.73  | 0.17 | 0.50 | 0.18 | 51  |
| 7 F59A2.3              | 65   | 3   | 2  | 25556   | 0.56  | 0.06 | 0.37 | 0.16 | 22  |
| 22 F59B8.2             | 1162 | 51  | 39 | 320178  | 1.18  | 0.34 | 0.55 | 0.20 | 360 |
| 10 F59B8.2             | 936  | 46  | 14 | 228805  | 0.84  | 0.29 | 0.51 | 0.16 | 130 |
| 7 F59B8.2              | 137  | 27  | 12 | 75415   | 0.83  | 0.30 | 0.55 | 0.18 | 80  |
| 1 F59B8.2              | 138  | 20  | 4  | 29802   | 1.07  | 0.44 | 0.51 | 0.15 | 25  |
| 22 F59D8.1             | 6320 | 413 | 14 | 1843910 | 0.73  | 0.13 | 0.49 | 0.16 | 113 |

|                                            |      |     |    |         |      |      |      |      |     |
|--------------------------------------------|------|-----|----|---------|------|------|------|------|-----|
| 10 F59D8.1                                 | 8418 | 470 | 13 | 2453630 | 0.86 | 0.30 | 0.51 | 0.13 | 105 |
| 1 F59D8.1                                  | 1700 | 162 | 3  | 322386  | 0.73 | 0.20 | 0.50 | 0.17 | 19  |
| 22 F59D8.2                                 | 6054 | 418 | 21 | 1835990 | 0.57 | 0.02 | 0.22 | 0.25 | 163 |
| 10 F59D8.2                                 | 8211 | 471 | 18 | 2442170 | 1.17 | 0.39 | 0.51 | 0.17 | 170 |
| 1 F59D8.2                                  | 1700 | 169 | 2  | 328403  | 0.44 | 0.02 | 0.22 | 0.19 | 8   |
| 7 F59D8.2                                  | 1294 | 123 | 1  | 290845  | 0.42 | 0.01 | 0.12 | 0.41 | 4   |
| 22 H06H21.8b;H06H21.8a                     | 80   | 16  | 3  | 48830   | 2.13 | 0.03 | 0.26 | 0.31 | 21  |
| 1 H06H21.9                                 | 13   | 5   | 1  | 11930   | 1.06 | 0.45 | 0.50 | 0.32 | 4   |
| 22 H06O01.1                                | 795  | 55  | 42 | 358664  | 0.76 | 0.16 | 0.50 | 0.17 | 354 |
| 10 H06O01.1                                | 809  | 71  | 42 | 411529  | 0.71 | 0.15 | 0.49 | 0.16 | 353 |
| 7 H06O01.1                                 | 652  | 69  | 37 | 280904  | 0.65 | 0.12 | 0.48 | 0.16 | 290 |
| 1 H06O01.1                                 | 618  | 55  | 30 | 167032  | 0.77 | 0.24 | 0.50 | 0.13 | 259 |
| 10 H06O01.3                                | 13   | 2   | 1  | 6378    | 4.61 | 0.00 | 0.02 | 0.25 | 5   |
| 22 H06O01.3                                | 55   | 4   | 1  | 20239   | 2.02 | 0.04 | 0.28 | 0.39 | 9   |
| 7 H13N06.3a;H13N06.3b                      | 81   | 3   | 1  | 172534  | 0.94 | 0.42 | 0.51 | 0.06 | 10  |
| 10 H14A12.2a                               | 1220 | 46  | 44 | 154729  | 0.89 | 0.34 | 0.51 | 0.19 | 415 |
| 1 H14A12.2a;H14A12.2b                      | 646  | 38  | 26 | 62027   | 0.87 | 0.35 | 0.50 | 0.17 | 206 |
| 22 H14A12.2a;H14A12.2b                     | 829  | 28  | 24 | 77118   | 0.76 | 0.16 | 0.50 | 0.17 | 245 |
| 7 H14A12.2a;H14A12.2b                      | 550  | 30  | 20 | 72166   | 1.12 | 0.40 | 0.52 | 0.20 | 161 |
| 22 H14E04.2a;H14E04.2b;H14E04.2c;H14E04.2d | 37   | 2   | 1  | 6675    | 1.57 | 0.13 | 0.49 | 0.14 | 8   |
| 1 H15N14.2a;H15N14.2b                      | 72   | 4   | 2  | 4149    | 1.18 | 0.34 | 0.51 | 0.14 | 13  |
| 10 H19M22.2b;H19M22.2a;H19M22.2d;H19M22.2c | 33   | 5   | 1  | 16355   | 0.47 | 0.02 | 0.18 | 0.12 | 4   |
| 10 H19N07.1                                | 317  | 28  | 19 | 127701  | 1.34 | 0.29 | 0.51 | 0.16 | 156 |
| 1 H19N07.1                                 | 173  | 19  | 9  | 49409   | 1.71 | 0.08 | 0.41 | 0.28 | 51  |
| 22 H19N07.1                                | 76   | 5   | 4  | 45639   | 1.86 | 0.06 | 0.34 | 0.12 | 39  |
| 10 H19N07.2a;H19N07.2b;H19N07.2c           | 84   | 6   | 2  | 11073   | 1.38 | 0.26 | 0.51 | 0.13 | 16  |
| 22 H19N07.2c;H19N07.2a;H19N07.2b           | 17   | 6   | 1  | 59783   | 2.17 | 0.03 | 0.25 | 0.12 | 4   |
| 1 H22K11.1                                 | 90   | 10  | 3  | 18630   | 1.00 | 0.48 | 0.50 | 0.17 | 17  |
| 22 H22K11.1                                | 113  | 10  | 3  | 99369   | 1.97 | 0.05 | 0.29 | 0.23 | 19  |
| 10 H27M09.2                                | 40   | 3   | 1  | 26639   | 0.65 | 0.10 | 0.48 | 0.25 | 7   |
| 7 H28G03.6                                 | 14   | 8   | 1  | 13845   | 1.41 | 0.20 | 0.53 | 0.21 | 5   |
| 7 H28O16.1a;H28O16.1c;H28O16.1b            | 864  | 26  | 22 | 71598   | 1.88 | 0.06 | 0.38 | 0.13 | 245 |
| 22 H28O16.1d                               | 1639 | 56  | 46 | 251182  | 1.28 | 0.28 | 0.54 | 0.16 | 492 |
| 10 H28O16.1d                               | 1489 | 44  | 37 | 299233  | 1.62 | 0.16 | 0.50 | 0.15 | 405 |

|                                  |      |     |     |         |      |      |      |      |      |
|----------------------------------|------|-----|-----|---------|------|------|------|------|------|
| 1 H28O16.1d;H28O16.1a            | 1033 | 30  | 22  | 70315   | 0.84 | 0.31 | 0.51 | 0.14 | 238  |
| 22 H34C03.2                      | 10   | 5   | 2   | 40586   | 1.01 | 0.50 | 0.50 | 0.17 | 12   |
| 10 H34C03.2                      | 99   | 7   | 2   | 9500    | 1.66 | 0.15 | 0.49 | 0.30 | 11   |
| 7 JC8.3a                         | 184  | 6   | 3   | 19705   | 0.23 | 0.00 | 0.00 | 0.22 | 21   |
| 22 JC8.3a                        | 237  | 7   | 2   | 48947   | 0.11 | 0.00 | 0.00 | 0.31 | 16   |
| 10 JC8.3a                        | 307  | 7   | 2   | 62639   | 0.24 | 0.00 | 0.00 | 0.41 | 9    |
| 1 JC8.3a                         | 197  | 9   | 1   | 30211   | 0.16 | 0.00 | 0.00 | 0.10 | 5    |
| 22 K01C8.10                      | 140  | 14  | 5   | 154784  | 0.96 | 0.44 | 0.52 | 0.17 | 49   |
| 10 K01C8.10                      | 186  | 11  | 4   | 47481   | 1.40 | 0.25 | 0.50 | 0.21 | 33   |
| 1 K01C8.10                       | 107  | 8   | 2   | 22670   | 1.28 | 0.27 | 0.50 | 0.13 | 27   |
| 7 K01C8.10                       | 41   | 2   | 1   | 3623    | 1.35 | 0.23 | 0.56 | 0.11 | 10   |
| 10 K01G5.4                       | 228  | 13  | 7   | 69210   | 1.01 | 0.48 | 0.51 | 0.18 | 54   |
| 22 K01G5.4                       | 275  | 10  | 6   | 81761   | 3.62 | 0.00 | 0.02 | 0.13 | 53   |
| 1 K01G5.4                        | 181  | 12  | 4   | 20828   | 1.21 | 0.32 | 0.51 | 0.21 | 33   |
| 7 K01G5.4                        | 97   | 3   | 2   | 11205   | 2.09 | 0.03 | 0.29 | 0.13 | 15   |
| 22 K01G5.7                       | 2518 | 83  | 9   | 302097  | 0.67 | 0.07 | 0.37 | 0.16 | 71   |
| 10 K01G5.7                       | 3189 | 90  | 7   | 307005  | 1.57 | 0.18 | 0.49 | 0.11 | 82   |
| 7 K01G5.7                        | 2565 | 63  | 5   | 188013  | 2.94 | 0.00 | 0.07 | 0.22 | 39   |
| 1 K01G5.7                        | 964  | 30  | 1   | 70930   | 3.70 | 0.00 | 0.01 | 0.21 | 11   |
| 22 K02A4.1                       | 70   | 5   | 1   | 3787    | 0.37 | 0.00 | 0.01 | 0.16 | 4    |
| 22 K02D10.1a;K02D10.1b;K02D10.1c | 280  | 7   | 4   | 88201   | 0.80 | 0.20 | 0.53 | 0.13 | 41   |
| 10 K02D10.1a;K02D10.1b;K02D10.1c | 156  | 7   | 3   | 67672   | 1.05 | 0.49 | 0.50 | 0.09 | 30   |
| 1 K02D10.1a;K02D10.1b;K02D10.1c  | 202  | 4   | 3   | 35238   | 1.20 | 0.33 | 0.51 | 0.12 | 37   |
| 7 K02D10.1a;K02D10.1b;K02D10.1c  | 130  | 3   | 2   | 35786   | 0.91 | 0.39 | 0.52 | 0.11 | 21   |
| 22 K02D7.4                       | 1198 | 48  | 25  | 112169  | 1.04 | 0.47 | 0.51 | 0.19 | 187  |
| 10 K02D7.4                       | 748  | 25  | 20  | 42982   | 1.08 | 0.46 | 0.51 | 0.15 | 179  |
| 1 K02D7.4                        | 144  | 19  | 13  | 13872   | 1.12 | 0.40 | 0.52 | 0.17 | 73   |
| 7 K02D7.4                        | 187  | 12  | 5   | 26363   | 0.98 | 0.47 | 0.50 | 0.17 | 47   |
| 10 K02F2.2                       | 4074 | 200 | 159 | 2579270 | 0.83 | 0.27 | 0.51 | 0.17 | 1374 |
| 22 K02F2.2                       | 4363 | 202 | 143 | 3021540 | 0.94 | 0.41 | 0.53 | 0.17 | 1196 |
| 7 K02F2.2                        | 3376 | 189 | 131 | 1180430 | 0.92 | 0.41 | 0.51 | 0.17 | 1063 |
| 1 K02F2.2                        | 3356 | 154 | 54  | 587873  | 0.89 | 0.36 | 0.51 | 0.16 | 490  |
| 7 K02F3.3                        | 29   | 2   | 1   | 2387    | 1.05 | 0.46 | 0.51 | 0.14 | 9    |
| 22 K03A1.5                       | 184  | 11  | 10  | 60371   | 1.15 | 0.37 | 0.55 | 0.16 | 102  |

|                      |     |    |    |        |      |      |      |      |     |
|----------------------|-----|----|----|--------|------|------|------|------|-----|
| 10 K03A1.5           | 225 | 13 | 10 | 62056  | 1.89 | 0.09 | 0.47 | 0.16 | 76  |
| 1 K03A1.5            | 43  | 5  | 2  | 12541  | 0.87 | 0.34 | 0.51 | 0.24 | 13  |
| 22 K04D7.1           | 557 | 28 | 22 | 107275 | 0.89 | 0.33 | 0.54 | 0.18 | 175 |
| 10 K04D7.1           | 427 | 20 | 13 | 129047 | 0.89 | 0.34 | 0.51 | 0.14 | 145 |
| 7 K04D7.1            | 123 | 6  | 5  | 20005  | 1.91 | 0.05 | 0.37 | 0.11 | 53  |
| 10 K04D7.3           | 564 | 27 | 16 | 196728 | 0.65 | 0.10 | 0.49 | 0.20 | 129 |
| 22 K04D7.3           | 274 | 16 | 11 | 92980  | 0.74 | 0.14 | 0.49 | 0.19 | 94  |
| 7 K04D7.3            | 523 | 22 | 11 | 88106  | 1.84 | 0.07 | 0.40 | 0.16 | 84  |
| 1 K04D7.3            | 219 | 9  | 8  | 23135  | 1.39 | 0.20 | 0.50 | 0.16 | 75  |
| 10 K04G2.1           | 35  | 5  | 1  | 19445  | 1.19 | 0.38 | 0.52 | 0.19 | 9   |
| 1 K04G7.4a;K04G7.4b  | 153 | 5  | 3  | 9283   | 1.08 | 0.43 | 0.52 | 0.13 | 32  |
| 22 K04G7.4a;K04G7.4b | 10  | 3  | 1  | 11577  | 1.14 | 0.38 | 0.55 | 0.10 | 6   |
| 7 K05C4.1            | 196 | 10 | 8  | 29361  | 1.04 | 0.46 | 0.51 | 0.15 | 68  |
| 1 K05C4.1            | 58  | 5  | 2  | 11685  | 1.86 | 0.05 | 0.32 | 0.13 | 14  |
| 22 K05C4.1           | 122 | 12 | 2  | 43346  | 1.27 | 0.28 | 0.54 | 0.14 | 16  |
| 10 K06A4.5           | 79  | 2  | 2  | 9312   | 0.55 | 0.04 | 0.32 | 0.12 | 17  |
| 22 K06A4.5           | 84  | 3  | 2  | 7013   | 0.57 | 0.02 | 0.23 | 0.27 | 12  |
| 10 K06A5.6           | 122 | 11 | 5  | 40802  | 1.16 | 0.40 | 0.51 | 0.19 | 40  |
| 22 K06A5.6           | 57  | 4  | 1  | 6498   | 1.11 | 0.40 | 0.54 | 0.09 | 8   |
| 1 K06A5.6            | 106 | 2  | 1  | 4161   | 0.63 | 0.11 | 0.50 | 0.18 | 15  |
| 7 K06G5.1a;K06G5.1b  | 150 | 2  | 1  | 3827   | 1.59 | 0.13 | 0.47 | 0.31 | 4   |
| 10 K07A1.12          | 92  | 5  | 3  | 23232  | 1.08 | 0.46 | 0.50 | 0.16 | 23  |
| 10 K07A1.2           | 19  | 2  | 1  | 29468  | 1.73 | 0.13 | 0.49 | 0.22 | 6   |
| 22 K07A12.7          | 73  | 11 | 5  | 47048  | 0.93 | 0.39 | 0.54 | 0.16 | 38  |
| 7 K07A12.7           | 26  | 6  | 2  | 16437  | 1.11 | 0.41 | 0.51 | 0.15 | 18  |
| 10 K07A12.7          | 64  | 6  | 2  | 34503  | 0.64 | 0.10 | 0.48 | 0.22 | 17  |
| 10 K07A3.1           | 603 | 22 | 15 | 185953 | 0.98 | 0.44 | 0.52 | 0.19 | 137 |
| 22 K07A3.1           | 349 | 14 | 12 | 135836 | 0.67 | 0.08 | 0.38 | 0.24 | 87  |
| 7 K07A3.1            | 417 | 10 | 9  | 92764  | 0.94 | 0.42 | 0.51 | 0.23 | 78  |
| 1 K07A3.1            | 490 | 10 | 8  | 41950  | 0.93 | 0.41 | 0.52 | 0.16 | 94  |
| 7 K07D4.3            | 36  | 4  | 1  | 19631  | 4.48 | 0.00 | 0.01 | 0.24 | 7   |
| 22 K07D4.3           | 57  | 9  | 1  | 14450  | 3.64 | 0.00 | 0.02 | 0.16 | 7   |
| 1 K07D4.3            | 70  | 5  | 1  | 26508  | 2.84 | 0.00 | 0.07 | 0.17 | 9   |
| 22 K07E12.1a         | 62  | 8  | 3  | 26987  | 7.15 | 0.00 | 0.00 | 0.09 | 23  |

|                                                 |      |     |     |         |      |      |      |      |      |
|-------------------------------------------------|------|-----|-----|---------|------|------|------|------|------|
| 10 K07E12.1a                                    | 80   | 10  | 1   | 39716   | 0.90 | 0.35 | 0.51 | 0.08 | 4    |
| 1 K07E12.1a;K07E12.1b                           | 28   | 6   | 3   | 77499   | 2.91 | 0.00 | 0.06 | 0.09 | 21   |
| 22 K07E3.3                                      | 303  | 11  | 8   | 25082   | 0.73 | 0.12 | 0.48 | 0.17 | 76   |
| 7 K07E3.3                                       | 190  | 8   | 6   | 21694   | 1.04 | 0.47 | 0.51 | 0.17 | 48   |
| 1 K07E3.3                                       | 95   | 4   | 1   | 5318    | 1.90 | 0.04 | 0.32 | 0.21 | 12   |
| 10 K07E3.3                                      | 128  | 5   | 1   | 16644   | 1.25 | 0.34 | 0.51 | 0.12 | 12   |
| 22 K07E3.4a;K07E3.4b                            | 81   | 7   | 5   | 15981   | 0.90 | 0.35 | 0.55 | 0.14 | 49   |
| 10 K07E3.4a;K07E3.4b                            | 27   | 8   | 3   | 45454   | 2.27 | 0.04 | 0.30 | 0.14 | 35   |
| 10 K07E8.3                                      | 32   | 2   | 1   | 5005    | 0.95 | 0.41 | 0.51 | 0.12 | 8    |
| 10 K07H8.6a;K07H8.6c;K07H8.6b                   | 4753 | 320 | 244 | 1686460 | 1.11 | 0.44 | 0.52 | 0.17 | 2011 |
| 22 K07H8.6a;K07H8.6c;K07H8.6b                   | 4058 | 287 | 217 | 1414390 | 0.83 | 0.24 | 0.54 | 0.17 | 1720 |
| 1 K07H8.6a;K07H8.6c;K07H8.6b                    | 1617 | 171 | 108 | 349172  | 1.02 | 0.50 | 0.50 | 0.18 | 792  |
| 7 K07H8.6a;K07H8.6c;K07H8.6b                    | 1224 | 110 | 50  | 278082  | 1.14 | 0.38 | 0.52 | 0.20 | 347  |
| 7 K08E3.5a;K08E3.5b;K08E3.5c;K08E3.5e;K08E3.5f  | 251  | 11  | 4   | 50624   | 1.64 | 0.11 | 0.47 | 0.16 | 39   |
| 22 K08E3.5c;K08E3.5b;K08E3.5a                   | 164  | 10  | 4   | 65593   | 1.18 | 0.35 | 0.55 | 0.08 | 34   |
| 10 K08E3.5c;K08E3.5b;K08E3.5a;K08E3.5e;K08E3.5f | 176  | 10  | 3   | 44621   | 1.66 | 0.15 | 0.49 | 0.11 | 20   |
| 7 K08F11.3                                      | 209  | 10  | 9   | 44834   | 1.05 | 0.46 | 0.51 | 0.10 | 74   |
| 10 K08F11.3                                     | 226  | 12  | 8   | 49384   | 2.15 | 0.05 | 0.37 | 0.13 | 73   |
| 22 K08F11.3                                     | 225  | 11  | 6   | 52662   | 1.20 | 0.33 | 0.54 | 0.16 | 47   |
| 1 K08F11.3                                      | 94   | 5   | 4   | 6056    | 0.56 | 0.06 | 0.39 | 0.17 | 27   |
| 10 K08F4.7                                      | 105  | 7   | 1   | 125761  | 3.98 | 0.00 | 0.04 | 0.05 | 7    |
| 10 K08F4.9                                      | 261  | 8   | 7   | 30458   | 0.52 | 0.03 | 0.27 | 0.14 | 62   |
| 1 K08F4.9                                       | 60   | 2   | 1   | 1635    | 0.52 | 0.04 | 0.31 | 0.18 | 9    |
| 22 K08F4.9                                      | 100  | 5   | 1   | 13749   | 0.62 | 0.04 | 0.29 | 0.24 | 10   |
| 22 K08F8.4                                      | 378  | 22  | 18  | 62587   | 0.83 | 0.25 | 0.55 | 0.17 | 170  |
| 10 K08F8.4                                      | 321  | 13  | 11  | 64523   | 0.92 | 0.38 | 0.52 | 0.16 | 111  |
| 7 K08F8.4                                       | 244  | 10  | 8   | 42140   | 0.71 | 0.17 | 0.52 | 0.16 | 69   |
| 1 K08F8.4                                       | 126  | 5   | 4   | 20766   | 0.41 | 0.01 | 0.16 | 0.16 | 35   |
| 1 K08H10.1                                      | 850  | 41  | 36  | 45484   | 1.18 | 0.34 | 0.51 | 0.16 | 262  |
| 10 K08H10.1                                     | 817  | 35  | 31  | 57849   | 0.94 | 0.40 | 0.51 | 0.18 | 266  |
| 22 K08H10.1                                     | 632  | 27  | 27  | 52879   | 1.05 | 0.46 | 0.52 | 0.19 | 215  |
| 7 K08H10.1                                      | 496  | 26  | 19  | 41123   | 1.04 | 0.47 | 0.51 | 0.17 | 154  |
| 22 K08H10.2b                                    | 226  | 16  | 9   | 44799   | 1.21 | 0.32 | 0.54 | 0.16 | 66   |
| 10 K08H10.2b                                    | 121  | 12  | 7   | 28051   | 0.76 | 0.20 | 0.49 | 0.14 | 50   |

|                                                |      |     |    |         |      |      |      |      |     |
|------------------------------------------------|------|-----|----|---------|------|------|------|------|-----|
| 1 K08H10.2b;K08H10.2a                          | 374  | 16  | 15 | 20858   | 1.19 | 0.33 | 0.51 | 0.22 | 121 |
| 7 K08H10.2b;K08H10.2a                          | 111  | 9   | 2  | 24383   | 0.58 | 0.07 | 0.39 | 0.22 | 16  |
| 22 K09E2.3                                     | 450  | 10  | 5  | 67820   | 0.93 | 0.39 | 0.54 | 0.24 | 36  |
| 10 K09E2.3                                     | 295  | 13  | 4  | 69036   | 0.60 | 0.07 | 0.42 | 0.16 | 24  |
| 1 K09E2.3                                      | 53   | 4   | 2  | 10426   | 1.34 | 0.23 | 0.50 | 0.11 | 10  |
| 7 K09E2.3                                      | 111  | 4   | 2  | 25470   | 1.32 | 0.25 | 0.53 | 0.20 | 17  |
| 10 K09F5.2                                     | 5841 | 352 | 14 | 1669180 | 1.01 | 0.48 | 0.51 | 0.15 | 110 |
| 22 K09F5.2                                     | 4920 | 342 | 2  | 1250920 | 1.22 | 0.32 | 0.53 | 0.34 | 15  |
| 1 K09F5.2                                      | 1508 | 192 | 1  | 370948  | 0.60 | 0.09 | 0.45 | 0.35 | 5   |
| 22 K10B3.10                                    | 85   | 14  | 6  | 27077   | 1.30 | 0.26 | 0.55 | 0.18 | 39  |
| 10 K10B3.10                                    | 60   | 8   | 5  | 10026   | 0.99 | 0.46 | 0.51 | 0.17 | 40  |
| 7 K10B3.10                                     | 41   | 6   | 2  | 6313    | 2.26 | 0.02 | 0.24 | 0.15 | 14  |
| 1 K10B3.10                                     | 24   | 4   | 1  | 2267    | 2.46 | 0.01 | 0.15 | 0.24 | 6   |
| 7 K10B3.7;K10B3.8                              | 1569 | 39  | 28 | 2070730 | 0.97 | 0.46 | 0.51 | 0.11 | 376 |
| 10 K10B3.7;K10B3.8                             | 1441 | 47  | 24 | 2958180 | 1.11 | 0.44 | 0.52 | 0.12 | 308 |
| 22 K10B3.7;K10B3.8                             | 1840 | 52  | 24 | 3531830 | 0.95 | 0.42 | 0.53 | 0.12 | 318 |
| 1 K10B3.7;K10B3.8                              | 1245 | 45  | 7  | 403718  | 1.24 | 0.30 | 0.50 | 0.16 | 69  |
| 1 K10C2.4                                      | 158  | 10  | 6  | 92816   | 0.76 | 0.22 | 0.50 | 0.21 | 42  |
| 22 K10C2.4                                     | 115  | 9   | 2  | 192430  | 0.70 | 0.10 | 0.42 | 0.24 | 17  |
| 7 K10C2.4                                      | 117  | 8   | 1  | 161970  | 1.60 | 0.12 | 0.48 | 0.10 | 6   |
| 10 K10C2.4                                     | 136  | 9   | 1  | 178932  | 4.02 | 0.00 | 0.04 | 0.08 | 7   |
| 10 K10C9.3                                     | 27   | 2   | 1  | 2476    | 0.50 | 0.02 | 0.24 | 0.22 | 5   |
| 1 K10C9.3                                      | 54   | 2   | 1  | 1415    | 0.73 | 0.20 | 0.50 | 0.12 | 6   |
| 10 K10H10.2                                    | 236  | 17  | 11 | 53159   | 1.17 | 0.40 | 0.51 | 0.21 | 84  |
| 7 K10H10.2                                     | 104  | 7   | 5  | 33596   | 0.97 | 0.46 | 0.51 | 0.16 | 32  |
| 22 K10H10.2                                    | 59   | 13  | 1  | 93903   | 0.46 | 0.00 | 0.05 | 0.19 | 5   |
| 22 K11B4.1                                     | 390  | 11  | 8  | 21605   | 0.92 | 0.37 | 0.55 | 0.14 | 90  |
| 22 K11C4.3b;K11C4.3a;K11C4.3c                  | 21   | 5   | 1  | 29455   | 0.96 | 0.43 | 0.52 | 0.22 | 6   |
| 22 K11E8.1c;K11E8.1h;K11E8.1e;K11E8.1f;K11E8.1 | 59   | 6   | 2  | 22557   | 1.08 | 0.43 | 0.52 | 0.16 | 10  |
| 1 K11G12.1a                                    | 11   | 2   | 1  | 338858  | 0.62 | 0.11 | 0.48 | 0.10 | 4   |
| 22 K11H12.2                                    | 161  | 10  | 3  | 40853   | 2.12 | 0.03 | 0.25 | 0.10 | 24  |
| 22 K11H3.1a;K11H3.1b;K11H3.1d                  | 237  | 23  | 7  | 98789   | 1.47 | 0.17 | 0.50 | 0.23 | 46  |
| 1 K11H3.1a;K11H3.1b;K11H3.1d                   | 81   | 4   | 2  | 11003   | 0.67 | 0.14 | 0.49 | 0.16 | 16  |
| 7 K11H3.1b;K11H3.1d                            | 84   | 10  | 5  | 36329   | 1.03 | 0.48 | 0.50 | 0.18 | 29  |

|                                              |      |    |    |         |      |      |      |      |     |
|----------------------------------------------|------|----|----|---------|------|------|------|------|-----|
| 10 K11H3.1b;K11H3.1d;K11H3.1a                | 94   | 9  | 2  | 62253   | 1.28 | 0.32 | 0.52 | 0.18 | 17  |
| 7 K12C11.1                                   | 487  | 25 | 18 | 144146  | 0.80 | 0.27 | 0.57 | 0.14 | 157 |
| 10 K12C11.1                                  | 285  | 17 | 14 | 143919  | 0.82 | 0.27 | 0.51 | 0.11 | 126 |
| 22 K12C11.1                                  | 281  | 15 | 12 | 142763  | 0.97 | 0.45 | 0.51 | 0.11 | 107 |
| 1 K12C11.1                                   | 372  | 16 | 12 | 66578   | 0.82 | 0.29 | 0.50 | 0.13 | 103 |
| 10 K12F2.1                                   | 169  | 17 | 1  | 43874   | 1.04 | 0.50 | 0.50 | 0.17 | 6   |
| 22 K12G11.3                                  | 213  | 14 | 8  | 46860   | 0.58 | 0.02 | 0.23 | 0.25 | 54  |
| 10 K12G11.3                                  | 159  | 9  | 5  | 54599   | 1.69 | 0.14 | 0.50 | 0.13 | 40  |
| 7 K12G11.3                                   | 103  | 5  | 3  | 13131   | 1.70 | 0.10 | 0.46 | 0.20 | 28  |
| 10 K12H4.7a;K12H4.7b                         | 394  | 10 | 7  | 42844   | 0.48 | 0.02 | 0.20 | 0.22 | 68  |
| 10 LLC1.3a;LLC1.3b                           | 358  | 30 | 19 | 81312   | 0.99 | 0.46 | 0.51 | 0.29 | 126 |
| 7 LLC1.3a;LLC1.3b                            | 467  | 38 | 19 | 134521  | 1.09 | 0.42 | 0.51 | 0.18 | 134 |
| 22 LLC1.3a;LLC1.3b                           | 316  | 18 | 14 | 67793   | 0.93 | 0.38 | 0.55 | 0.20 | 125 |
| 1 LLC1.3a;LLC1.3b                            | 231  | 15 | 8  | 53405   | 0.81 | 0.28 | 0.49 | 0.21 | 58  |
| 10 M01E11.5                                  | 43   | 5  | 3  | 34729   | 1.47 | 0.22 | 0.49 | 0.20 | 24  |
| 22 M01E11.5                                  | 55   | 7  | 2  | 53041   | 2.16 | 0.03 | 0.24 | 0.13 | 24  |
| 1 M01E11.5                                   | 124  | 15 | 1  | 39387   | 0.31 | 0.00 | 0.04 | 0.09 | 4   |
| 22 M01F1.2                                   | 248  | 19 | 10 | 355212  | 1.79 | 0.08 | 0.38 | 0.10 | 84  |
| 10 M01F1.2                                   | 261  | 24 | 6  | 214645  | 2.47 | 0.03 | 0.25 | 0.30 | 38  |
| 1 M01F1.2                                    | 211  | 10 | 5  | 118808  | 1.46 | 0.16 | 0.49 | 0.14 | 47  |
| 7 M01F1.2                                    | 112  | 10 | 4  | 72507   | 1.25 | 0.29 | 0.55 | 0.08 | 39  |
| 10 M02D8.1                                   | 45   | 7  | 3  | 78584   | 1.42 | 0.24 | 0.50 | 0.31 | 13  |
| 7 M02D8.1                                    | 49   | 7  | 1  | 42031   | 0.88 | 0.36 | 0.52 | 0.12 | 4   |
| 22 M03A8.1                                   | 1033 | 22 | 18 | 97207   | 1.04 | 0.46 | 0.51 | 0.15 | 185 |
| 7 M03A8.1                                    | 778  | 16 | 16 | 69346   | 0.84 | 0.31 | 0.55 | 0.13 | 165 |
| 1 M03A8.1                                    | 1156 | 21 | 15 | 46477   | 1.12 | 0.40 | 0.52 | 0.14 | 143 |
| 10 M03A8.1                                   | 770  | 17 | 13 | 67240   | 0.78 | 0.22 | 0.50 | 0.17 | 123 |
| 1 M03F4.2a;M03F4.2b;M03F4.2c;T04C12.4;T04C   | 1149 | 71 | 26 | 899991  | 1.03 | 0.49 | 0.49 | 0.16 | 163 |
| 22 M03F4.2a;T04C12.4;T04C12.5;T04C12.6;M03F4 | 1300 | 80 | 55 | 1786120 | 1.06 | 0.45 | 0.52 | 0.15 | 419 |
| 7 M03F4.2b;M03F4.2c                          | 442  | 45 | 1  | 643811  | 1.27 | 0.28 | 0.55 | 0.09 | 7   |
| 10 M03F4.2c;M03F4.2b                         | 977  | 74 | 42 | 1293800 | 1.12 | 0.43 | 0.51 | 0.14 | 286 |
| 22 M03F4.7a                                  | 305  | 20 | 13 | 356567  | 0.73 | 0.13 | 0.49 | 0.32 | 108 |
| 1 M03F4.7a                                   | 86   | 12 | 7  | 41276   | 1.95 | 0.04 | 0.29 | 0.12 | 54  |
| 7 M03F4.7a                                   | 63   | 9  | 5  | 43961   | 0.37 | 0.00 | 0.07 | 0.16 | 34  |

|                                                |      |     |     |         |       |      |      |      |      |
|------------------------------------------------|------|-----|-----|---------|-------|------|------|------|------|
| 10 M03F4.7a;M03F4.7b                           | 151  | 17  | 11  | 171865  | 0.62  | 0.08 | 0.48 | 0.21 | 68   |
| 7 M110.4a;M110.4b;M110.4c;M110.4d;M110.4e      | 51   | 4   | 1   | 4253    | 0.70  | 0.16 | 0.49 | 0.21 | 7    |
| 22 M110.4a;M110.4b;M110.4c;M110.4e             | 201  | 9   | 4   | 21168   | 0.74  | 0.13 | 0.49 | 0.22 | 40   |
| 1 M110.4a;M110.4b;M110.4c;M110.4e              | 226  | 8   | 4   | 9270    | 0.71  | 0.18 | 0.50 | 0.13 | 47   |
| 10 M110.4c;M110.4a;M110.4b;M110.4e             | 152  | 7   | 5   | 13786   | 0.69  | 0.13 | 0.50 | 0.16 | 61   |
| 7 M117.2                                       | 647  | 26  | 22  | 174143  | 0.93  | 0.42 | 0.51 | 0.17 | 209  |
| 1 M117.2                                       | 676  | 26  | 22  | 156750  | 0.77  | 0.24 | 0.50 | 0.14 | 197  |
| 10 M117.2                                      | 743  | 24  | 15  | 204076  | 0.71  | 0.15 | 0.50 | 0.16 | 156  |
| 22 M117.2                                      | 691  | 25  | 12  | 134709  | 1.00  | 0.50 | 0.50 | 0.17 | 116  |
| 10 M153.1                                      | 533  | 21  | 18  | 165104  | 1.02  | 0.48 | 0.51 | 0.15 | 177  |
| 22 M153.1                                      | 579  | 21  | 18  | 116199  | 0.89  | 0.34 | 0.54 | 0.16 | 147  |
| 1 M153.1                                       | 374  | 15  | 12  | 55867   | 1.36  | 0.21 | 0.51 | 0.17 | 103  |
| 7 M153.1                                       | 351  | 12  | 10  | 53349   | 1.08  | 0.43 | 0.51 | 0.16 | 94   |
| 22 M176.2                                      | 29   | 2   | 2   | 1361    | 1.44  | 0.19 | 0.51 | 0.15 | 9    |
| 10 R01E6.3a                                    | 105  | 6   | 4   | 69867   | 0.74  | 0.18 | 0.50 | 0.15 | 27   |
| 7 R01E6.3a;R01E6.3b                            | 137  | 5   | 3   | 31460   | 1.03  | 0.48 | 0.51 | 0.16 | 24   |
| 22 R01E6.3a;R01E6.3b                           | 58   | 6   | 2   | 54733   | 1.01  | 0.49 | 0.50 | 0.11 | 14   |
| 22 R01H2.5                                     | 328  | 10  | 5   | 27779   | 1.20  | 0.33 | 0.54 | 0.14 | 48   |
| 10 R01H2.5                                     | 173  | 6   | 3   | 21781   | 1.75  | 0.12 | 0.49 | 0.14 | 31   |
| 10 R02D3.1                                     | 64   | 5   | 4   | 5972    | 0.82  | 0.27 | 0.51 | 0.14 | 23   |
| 22 R03A10.4a;R03A10.4b                         | 346  | 7   | 7   | 31987   | 0.82  | 0.24 | 0.54 | 0.15 | 54   |
| 1 R03D7.6                                      | 141  | 11  | 7   | 14287   | 1.55  | 0.12 | 0.50 | 0.27 | 53   |
| 22 R03D7.6                                     | 63   | 4   | 3   | 6056    | 0.60  | 0.03 | 0.26 | 0.16 | 24   |
| 22 R03G5.1a;F31E3.5;R03G5.1c;R03G5.1b          | 3109 | 159 | 137 | 4682060 | 1.00  | 0.49 | 0.51 | 0.15 | 1323 |
| 7 R03G5.1a;F31E3.5;R03G5.1c;R03G5.1d;R03G5.1e  | 2113 | 140 | 108 | 2495530 | 1.16  | 0.36 | 0.52 | 0.17 | 981  |
| 10 R03G5.1a;F31E3.5;R03G5.1d;R03G5.1c;R03G5.1e | 3699 | 174 | 145 | 6458940 | 0.96  | 0.41 | 0.51 | 0.15 | 1445 |
| 1 R03G5.1a;F31E3.5;R03G5.1d;R03G5.1c;R03G5.1e  | 2334 | 133 | 93  | 3331630 | 1.16  | 0.36 | 0.51 | 0.13 | 927  |
| 1 R04A9.4                                      | 37   | 2   | 2   | 8795    | 1.65  | 0.09 | 0.45 | 0.16 | 12   |
| 10 R05F9.10                                    | 91   | 3   | 1   | 22245   | 0.58  | 0.06 | 0.39 | 0.30 | 11   |
| 10 R05F9.12                                    | 179  | 6   | 6   | 8394    | 1.10  | 0.45 | 0.51 | 0.17 | 46   |
| 22 R05F9.12                                    | 158  | 12  | 1   | 39793   | 15.07 | 0.00 | 0.00 | 0.28 | 4    |
| 22 R05F9.6                                     | 250  | 16  | 8   | 602351  | 1.37  | 0.22 | 0.54 | 0.17 | 65   |
| 10 R05F9.6                                     | 252  | 13  | 8   | 407977  | 1.22  | 0.36 | 0.51 | 0.15 | 54   |
| 7 R05F9.6                                      | 198  | 18  | 4   | 901286  | 1.40  | 0.20 | 0.53 | 0.16 | 21   |

|                               |     |    |    |        |      |      |      |      |     |
|-------------------------------|-----|----|----|--------|------|------|------|------|-----|
| 1 R05F9.6                     | 94  | 9  | 1  | 785375 | 0.69 | 0.16 | 0.50 | 0.16 | 7   |
| 1 R05G6.7                     | 116 | 8  | 3  | 206415 | 0.44 | 0.02 | 0.21 | 0.12 | 24  |
| 10 R06C7.1                    | 42  | 4  | 2  | 8527   | 2.45 | 0.03 | 0.25 | 0.18 | 11  |
| 22 R06C7.10                   | 165 | 17 | 6  | 46557  | 1.09 | 0.42 | 0.53 | 0.16 | 47  |
| 10 R06C7.10                   | 143 | 11 | 3  | 24221  | 1.38 | 0.26 | 0.51 | 0.22 | 35  |
| 1 R06C7.10                    | 157 | 12 | 3  | 10171  | 1.38 | 0.20 | 0.50 | 0.20 | 19  |
| 22 R06C7.5a;R06C7.5b          | 11  | 4  | 1  | 32025  | 1.32 | 0.25 | 0.55 | 0.17 | 9   |
| 10 R06F6.9                    | 40  | 8  | 2  | 15991  | 0.83 | 0.27 | 0.51 | 0.12 | 11  |
| 7 R06F6.9                     | 27  | 6  | 1  | 7216   | 0.90 | 0.38 | 0.52 | 0.16 | 5   |
| 22 R06F6.9                    | 86  | 7  | 1  | 22326  | 0.49 | 0.00 | 0.08 | 0.35 | 5   |
| 10 R07B1.4                    | 337 | 17 | 12 | 48200  | 0.82 | 0.27 | 0.51 | 0.21 | 90  |
| 22 R07B1.4                    | 239 | 16 | 9  | 36824  | 0.70 | 0.10 | 0.43 | 0.21 | 72  |
| 7 R07B1.4                     | 170 | 4  | 3  | 10209  | 1.01 | 0.50 | 0.50 | 0.15 | 35  |
| 1 R07B1.4                     | 97  | 3  | 2  | 3281   | 1.09 | 0.43 | 0.52 | 0.18 | 13  |
| 10 R07E4.6b;R07E4.6a;R07E4.6c | 464 | 15 | 8  | 53021  | 1.49 | 0.21 | 0.50 | 0.13 | 116 |
| 22 R07E4.6b;R07E4.6a;R07E4.6c | 396 | 9  | 6  | 36555  | 1.13 | 0.39 | 0.54 | 0.13 | 89  |
| 1 R07E4.6b;R07E4.6a;R07E4.6c  | 181 | 8  | 3  | 12532  | 0.94 | 0.42 | 0.52 | 0.17 | 29  |
| 7 R07E4.6b;R07E4.6a;R07E4.6c  | 242 | 6  | 3  | 21810  | 0.96 | 0.44 | 0.51 | 0.12 | 46  |
| 10 R07E5.2                    | 140 | 6  | 5  | 36289  | 0.84 | 0.29 | 0.51 | 0.20 | 27  |
| 22 R07E5.2                    | 203 | 8  | 2  | 35352  | 0.60 | 0.03 | 0.26 | 0.17 | 20  |
| 7 R07E5.2                     | 82  | 3  | 1  | 14765  | 0.93 | 0.41 | 0.51 | 0.15 | 9   |
| 10 R07G3.3a;R07G3.3b;R07G3.3c | 74  | 7  | 1  | 21961  | 0.68 | 0.13 | 0.50 | 0.19 | 8   |
| 10 R07H5.2a;R07H5.2b          | 35  | 10 | 2  | 61529  | 1.88 | 0.09 | 0.48 | 0.15 | 20  |
| 22 R07H5.2a;R07H5.2b          | 12  | 4  | 1  | 24805  | 1.36 | 0.23 | 0.54 | 0.13 | 13  |
| 1 R07H5.2a;R07H5.2b           | 43  | 3  | 1  | 18968  | 0.84 | 0.31 | 0.51 | 0.25 | 7   |
| 22 R07H5.8                    | 541 | 28 | 18 | 231787 | 0.75 | 0.15 | 0.49 | 0.16 | 186 |
| 10 R07H5.8                    | 606 | 25 | 17 | 175153 | 0.51 | 0.03 | 0.24 | 0.12 | 159 |
| 7 R07H5.8                     | 460 | 20 | 16 | 94233  | 0.59 | 0.08 | 0.43 | 0.16 | 141 |
| 1 R07H5.8                     | 152 | 14 | 4  | 15420  | 0.40 | 0.01 | 0.15 | 0.16 | 21  |
| 1 R08D7.3                     | 47  | 6  | 1  | 276888 | 0.82 | 0.29 | 0.50 | 0.16 | 9   |
| 22 R08E5.2a;R08E5.2c;R08E5.2b | 47  | 6  | 1  | 14107  | 1.86 | 0.06 | 0.34 | 0.24 | 4   |
| 22 R09E12.3                   | 118 | 15 | 7  | 67736  | 0.63 | 0.05 | 0.30 | 0.32 | 46  |
| 10 R09E12.3                   | 81  | 9  | 3  | 42318  | 0.36 | 0.00 | 0.05 | 0.34 | 14  |
| 7 R09E12.3                    | 18  | 4  | 1  | 20927  | 0.21 | 0.00 | 0.00 | 0.46 | 8   |

|                                        |      |    |    |         |      |      |      |      |     |
|----------------------------------------|------|----|----|---------|------|------|------|------|-----|
| 22 R09H10.5                            | 69   | 6  | 4  | 4567    | 1.00 | 0.49 | 0.50 | 0.15 | 23  |
| 10 R09H10.5                            | 83   | 8  | 4  | 5380    | 0.73 | 0.17 | 0.49 | 0.09 | 26  |
| 1 R102.4b;R102.4a;R102.4c              | 47   | 6  | 2  | 25524   | 1.08 | 0.43 | 0.51 | 0.20 | 14  |
| 10 R102.4b;R102.4a;R102.4c             | 35   | 4  | 1  | 17248   | 1.66 | 0.15 | 0.49 | 0.18 | 8   |
| 22 R107.7                              | 143  | 17 | 11 | 224552  | 1.06 | 0.45 | 0.52 | 0.12 | 87  |
| 10 R107.7                              | 136  | 16 | 8  | 159526  | 0.72 | 0.17 | 0.49 | 0.19 | 60  |
| 1 R107.7                               | 73   | 7  | 3  | 49241   | 0.46 | 0.02 | 0.26 | 0.17 | 23  |
| 7 R107.7                               | 97   | 8  | 3  | 54017   | 0.70 | 0.17 | 0.51 | 0.11 | 25  |
| 22 R10H10.1                            | 81   | 3  | 3  | 4556    | 0.91 | 0.36 | 0.56 | 0.16 | 23  |
| 1 R10H10.1                             | 81   | 7  | 3  | 11196   | 1.27 | 0.27 | 0.49 | 0.14 | 24  |
| 1 R11A5.4a;R11A5.4d;R11A5.4b           | 820  | 62 | 21 | 252510  | 1.39 | 0.20 | 0.51 | 0.17 | 154 |
| 10 R11A5.4a;R11A5.4d;R11A5.4b;R11A5.4c | 1088 | 94 | 58 | 1111350 | 0.97 | 0.43 | 0.51 | 0.21 | 470 |
| 22 R11A5.4a;R11A5.4d;R11A5.4b;R11A5.4c | 842  | 84 | 55 | 526299  | 0.89 | 0.33 | 0.54 | 0.20 | 409 |
| 7 R11A5.4a;R11A5.4d;R11A5.4b;R11A5.4c  | 378  | 55 | 15 | 200382  | 0.80 | 0.26 | 0.56 | 0.23 | 108 |
| 10 R11A8.6                             | 149  | 13 | 6  | 20598   | 0.61 | 0.07 | 0.43 | 0.17 | 40  |
| 22 R11A8.6                             | 64   | 9  | 1  | 37491   | 0.32 | 0.00 | 0.00 | 0.33 | 6   |
| 10 R11D1.11                            | 363  | 10 | 2  | 68851   | 3.39 | 0.00 | 0.07 | 0.25 | 16  |
| 22 R11D1.11                            | 460  | 15 | 1  | 83321   | 2.46 | 0.01 | 0.15 | 0.10 | 7   |
| 7 R11E3.8                              | 327  | 9  | 8  | 45780   | 1.91 | 0.05 | 0.36 | 0.14 | 72  |
| 1 R11E3.8                              | 196  | 6  | 5  | 25956   | 1.28 | 0.26 | 0.50 | 0.14 | 33  |
| 10 R11E3.8                             | 256  | 7  | 5  | 34869   | 0.41 | 0.01 | 0.09 | 0.13 | 46  |
| 22 R11E3.8                             | 209  | 7  | 4  | 35071   | 0.85 | 0.27 | 0.55 | 0.13 | 39  |
| 10 R11H6.1                             | 923  | 40 | 35 | 132166  | 0.77 | 0.21 | 0.50 | 0.20 | 301 |
| 7 R11H6.1                              | 1303 | 52 | 31 | 143953  | 0.83 | 0.30 | 0.55 | 0.22 | 249 |
| 1 R11H6.1                              | 675  | 29 | 25 | 74712   | 1.07 | 0.45 | 0.51 | 0.16 | 204 |
| 22 R11H6.1                             | 842  | 26 | 22 | 69686   | 0.89 | 0.33 | 0.54 | 0.18 | 204 |
| 10 R12C12.1a                           | 553  | 34 | 17 | 156967  | 0.74 | 0.18 | 0.50 | 0.15 | 126 |
| 22 R12C12.1a                           | 292  | 32 | 11 | 127706  | 0.90 | 0.35 | 0.54 | 0.49 | 53  |
| 1 R12C12.1a                            | 229  | 27 | 8  | 44872   | 0.70 | 0.17 | 0.49 | 0.19 | 52  |
| 7 R12C12.1a;R12C12.1b                  | 116  | 12 | 3  | 28697   | 0.25 | 0.00 | 0.00 | 0.28 | 16  |
| 22 R12E2.3                             | 176  | 10 | 7  | 46979   | 0.87 | 0.31 | 0.54 | 0.15 | 53  |
| 10 R12E2.3                             | 68   | 9  | 4  | 32753   | 1.55 | 0.18 | 0.49 | 0.21 | 26  |
| 22 R13A5.8                             | 678  | 33 | 23 | 436187  | 0.82 | 0.24 | 0.54 | 0.16 | 191 |
| 1 R13A5.8                              | 248  | 19 | 13 | 89480   | 0.89 | 0.36 | 0.51 | 0.15 | 102 |

|                              |      |     |     |        |      |      |      |      |     |
|------------------------------|------|-----|-----|--------|------|------|------|------|-----|
| 10 R13A5.8                   | 485  | 23  | 11  | 258397 | 0.94 | 0.39 | 0.51 | 0.19 | 89  |
| 7 R13A5.8                    | 361  | 12  | 7   | 42620  | 0.73 | 0.19 | 0.52 | 0.13 | 87  |
| 22 R13F6.10                  | 86   | 5   | 2   | 8118   | 0.45 | 0.00 | 0.04 | 0.31 | 9   |
| 10 R13F6.10                  | 117  | 5   | 2   | 13978  | 0.79 | 0.23 | 0.50 | 0.10 | 28  |
| 10 R151.2a;R151.2c           | 255  | 8   | 2   | 18669  | 0.32 | 0.00 | 0.02 | 0.22 | 11  |
| 22 R151.3                    | 1366 | 51  | 39  | 826975 | 1.72 | 0.09 | 0.41 | 0.12 | 365 |
| 10 R151.3                    | 1248 | 44  | 34  | 632150 | 1.27 | 0.32 | 0.51 | 0.14 | 298 |
| 7 R151.3                     | 545  | 30  | 25  | 186065 | 1.34 | 0.24 | 0.55 | 0.13 | 210 |
| 1 R151.3                     | 946  | 33  | 25  | 182566 | 0.75 | 0.21 | 0.50 | 0.13 | 232 |
| 7 R31.1a;R31.1b              | 56   | 12  | 3   | 26830  | 1.97 | 0.05 | 0.34 | 0.23 | 15  |
| 10 R31.1a;R31.1b             | 74   | 15  | 1   | 349040 | 0.46 | 0.01 | 0.17 | 0.50 | 6   |
| 10 R74.1                     | 1555 | 79  | 68  | 182465 | 1.10 | 0.45 | 0.51 | 0.15 | 499 |
| 22 R74.1                     | 802  | 53  | 43  | 111383 | 1.10 | 0.41 | 0.53 | 0.17 | 302 |
| 1 R74.1                      | 244  | 26  | 16  | 28125  | 0.80 | 0.27 | 0.49 | 0.16 | 93  |
| 7 R74.1                      | 153  | 22  | 6   | 25938  | 1.65 | 0.11 | 0.47 | 0.19 | 40  |
| 7 T01C8.5                    | 277  | 31  | 23  | 79682  | 0.37 | 0.00 | 0.07 | 0.17 | 168 |
| 22 T01C8.5                   | 261  | 17  | 10  | 132246 | 1.00 | 0.50 | 0.50 | 0.17 | 80  |
| 1 T01C8.5                    | 160  | 16  | 1   | 20716  | 3.50 | 0.00 | 0.01 | 0.18 | 6   |
| 22 T01D1.4                   | 24   | 3   | 2   | 26567  | 2.69 | 0.01 | 0.11 | 0.15 | 17  |
| 10 T01D1.4                   | 36   | 3   | 2   | 9691   | 1.45 | 0.23 | 0.50 | 0.22 | 8   |
| 22 T02G5.7                   | 137  | 8   | 4   | 38158  | 1.04 | 0.46 | 0.51 | 0.18 | 29  |
| 1 T02G5.7                    | 145  | 8   | 1   | 9067   | 0.80 | 0.27 | 0.49 | 0.17 | 6   |
| 7 T02G5.8                    | 32   | 5   | 1   | 10253  | 1.00 | 0.49 | 0.50 | 0.35 | 4   |
| 10 T02G5.9a;T02G5.9b         | 226  | 13  | 10  | 115988 | 0.66 | 0.11 | 0.48 | 0.11 | 81  |
| 22 T02G5.9a;T02G5.9b         | 285  | 17  | 10  | 120873 | 1.16 | 0.36 | 0.56 | 0.13 | 93  |
| 1 T02G5.9a;T02G5.9b          | 206  | 9   | 2   | 16246  | 0.67 | 0.14 | 0.49 | 0.07 | 13  |
| 7 T02G5.9a;T02G5.9b;T02G5.9c | 209  | 13  | 2   | 23225  | 1.53 | 0.15 | 0.50 | 0.22 | 12  |
| 22 T03E6.7                   | 84   | 5   | 3   | 11524  | 1.13 | 0.38 | 0.55 | 0.14 | 19  |
| 10 T03E6.7                   | 94   | 6   | 3   | 16176  | 1.31 | 0.30 | 0.51 | 0.12 | 24  |
| 1 T03E6.7                    | 234  | 8   | 2   | 11436  | 0.66 | 0.14 | 0.49 | 0.12 | 11  |
| 7 T03E6.7                    | 131  | 4   | 1   | 10897  | 0.78 | 0.24 | 0.54 | 0.09 | 7   |
| 10 T03F1.3                   | 3503 | 143 | 105 | 606765 | 0.73 | 0.17 | 0.50 | 0.17 | 975 |
| 22 T03F1.3                   | 3533 | 134 | 90  | 528617 | 0.84 | 0.26 | 0.55 | 0.17 | 825 |
| 7 T03F1.3                    | 3498 | 129 | 78  | 387021 | 0.91 | 0.39 | 0.52 | 0.16 | 650 |

|                      |      |    |    |        |      |      |      |      |     |
|----------------------|------|----|----|--------|------|------|------|------|-----|
| 1 T03F1.3            | 2410 | 90 | 57 | 196264 | 0.87 | 0.34 | 0.51 | 0.14 | 549 |
| 22 T03F1.8a;T03F1.8b | 43   | 6  | 2  | 28305  | 0.86 | 0.29 | 0.54 | 0.12 | 15  |
| 1 T03F6.1            | 94   | 9  | 5  | 25806  | 1.17 | 0.35 | 0.51 | 0.17 | 29  |
| 7 T03F6.1            | 93   | 8  | 4  | 17052  | 0.99 | 0.48 | 0.51 | 0.15 | 31  |
| 22 T03F6.1;R08B4.5   | 341  | 10 | 9  | 47496  | 1.08 | 0.43 | 0.52 | 0.13 | 85  |
| 10 T03F6.1;R08B4.5   | 108  | 7  | 5  | 29149  | 1.22 | 0.36 | 0.51 | 0.14 | 41  |
| 1 T03F6.3            | 79   | 3  | 3  | 5182   | 1.07 | 0.45 | 0.50 | 0.17 | 15  |
| 7 T03F6.3            | 40   | 2  | 2  | 6215   | 1.11 | 0.40 | 0.52 | 0.18 | 14  |
| 10 T03F6.3           | 65   | 2  | 2  | 5897   | 1.11 | 0.44 | 0.52 | 0.10 | 19  |
| 22 T03F6.3           | 67   | 3  | 1  | 10838  | 1.00 | 0.50 | 0.50 | 0.49 | 4   |
| 22 T04A8.7a          | 270  | 11 | 8  | 70617  | 1.30 | 0.26 | 0.55 | 0.17 | 74  |
| 10 T04A8.7a          | 73   | 11 | 7  | 111030 | 1.43 | 0.24 | 0.50 | 0.19 | 53  |
| 1 T04A8.7a           | 95   | 5  | 4  | 37683  | 1.33 | 0.23 | 0.49 | 0.14 | 29  |
| 7 T04A8.7a           | 101  | 6  | 1  | 7483   | 2.13 | 0.03 | 0.28 | 0.62 | 4   |
| 22 T04F3.1           | 15   | 4  | 1  | 8965   | 0.77 | 0.17 | 0.50 | 0.07 | 4   |
| 7 T04F3.1            | 23   | 3  | 1  | 12892  | 0.89 | 0.36 | 0.52 | 0.18 | 5   |
| 7 T05B11.3           | 80   | 5  | 4  | 8497   | 1.72 | 0.09 | 0.45 | 0.19 | 33  |
| 22 T05B11.3          | 133  | 5  | 4  | 7445   | 1.28 | 0.28 | 0.54 | 0.18 | 36  |
| 1 T05B11.3           | 55   | 3  | 2  | 3638   | 0.86 | 0.34 | 0.52 | 0.19 | 10  |
| 10 T05B11.3          | 100  | 5  | 2  | 9130   | 0.81 | 0.25 | 0.50 | 0.15 | 18  |
| 22 T05C12.3          | 123  | 10 | 1  | 279709 | 1.29 | 0.27 | 0.55 | 0.17 | 5   |
| 22 T05C12.7          | 868  | 34 | 27 | 148867 | 0.77 | 0.18 | 0.50 | 0.14 | 201 |
| 10 T05C12.7          | 727  | 26 | 21 | 157948 | 0.85 | 0.30 | 0.51 | 0.13 | 196 |
| 7 T05C12.7           | 426  | 25 | 18 | 79286  | 0.94 | 0.43 | 0.51 | 0.17 | 136 |
| 1 T05C12.7           | 407  | 27 | 14 | 54791  | 1.08 | 0.44 | 0.51 | 0.11 | 97  |
| 10 T05D4.1           | 755  | 33 | 24 | 287885 | 0.88 | 0.33 | 0.51 | 0.18 | 244 |
| 22 T05D4.1           | 695  | 34 | 22 | 281962 | 0.99 | 0.47 | 0.51 | 0.17 | 193 |
| 1 T05D4.1            | 607  | 30 | 19 | 110889 | 0.75 | 0.22 | 0.50 | 0.18 | 156 |
| 7 T05D4.1            | 501  | 22 | 14 | 131125 | 0.75 | 0.21 | 0.54 | 0.21 | 138 |
| 22 T05E11.1          | 373  | 12 | 5  | 60301  | 6.17 | 0.00 | 0.00 | 0.25 | 30  |
| 1 T05E11.1           | 251  | 8  | 4  | 13779  | 1.71 | 0.08 | 0.42 | 0.24 | 30  |
| 7 T05E11.1           | 268  | 9  | 4  | 24173  | 1.72 | 0.09 | 0.46 | 0.12 | 36  |
| 10 T05E11.3          | 970  | 49 | 40 | 146107 | 0.66 | 0.11 | 0.49 | 0.16 | 286 |
| 22 T05E11.3          | 896  | 57 | 25 | 197585 | 0.92 | 0.38 | 0.55 | 0.21 | 173 |

|                               |     |    |    |        |      |      |      |      |     |
|-------------------------------|-----|----|----|--------|------|------|------|------|-----|
| 1 T05E11.3                    | 261 | 29 | 22 | 35175  | 0.72 | 0.19 | 0.50 | 0.20 | 115 |
| 7 T05E11.3                    | 401 | 37 | 7  | 58808  | 0.69 | 0.15 | 0.50 | 0.25 | 38  |
| 1 T05G5.6                     | 406 | 25 | 16 | 59163  | 1.19 | 0.34 | 0.52 | 0.15 | 120 |
| 22 T05G5.6                    | 400 | 16 | 11 | 63586  | 1.16 | 0.36 | 0.55 | 0.18 | 95  |
| 10 T05G5.6                    | 210 | 12 | 8  | 36311  | 0.96 | 0.42 | 0.51 | 0.21 | 70  |
| 7 T05G5.6                     | 268 | 11 | 7  | 38445  | 0.74 | 0.20 | 0.53 | 0.17 | 57  |
| 10 T05H10.6a;T05H10.6b        | 285 | 18 | 9  | 101539 | 0.77 | 0.21 | 0.50 | 0.15 | 94  |
| 22 T05H10.6a;T05H10.6b        | 260 | 11 | 6  | 39635  | 1.08 | 0.43 | 0.52 | 0.19 | 63  |
| 7 T05H10.6a;T05H10.6b         | 138 | 8  | 4  | 27484  | 1.59 | 0.13 | 0.47 | 0.15 | 44  |
| 1 T05H10.6a;T05H10.6b         | 95  | 10 | 3  | 35759  | 1.96 | 0.04 | 0.30 | 0.16 | 22  |
| 1 T05H4.6                     | 123 | 8  | 5  | 19567  | 0.97 | 0.45 | 0.50 | 0.19 | 37  |
| 10 T05H4.6                    | 145 | 5  | 3  | 18896  | 1.00 | 0.47 | 0.50 | 0.16 | 20  |
| 22 T06D8.8                    | 57  | 2  | 2  | 2094   | 0.95 | 0.42 | 0.53 | 0.16 | 18  |
| 10 T06D8.8                    | 89  | 4  | 2  | 7305   | 1.02 | 0.48 | 0.51 | 0.15 | 17  |
| 7 T06G6.9                     | 247 | 6  | 6  | 10092  | 0.46 | 0.02 | 0.20 | 0.18 | 29  |
| 1 T06G6.9                     | 66  | 5  | 3  | 2396   | 1.75 | 0.07 | 0.39 | 0.18 | 14  |
| 22 T06G6.9                    | 103 | 5  | 3  | 5749   | 1.26 | 0.29 | 0.54 | 0.18 | 19  |
| 10 T06G6.9                    | 155 | 4  | 2  | 9364   | 0.63 | 0.09 | 0.46 | 0.13 | 16  |
| 22 T07A9.7                    | 115 | 6  | 2  | 9071   | 0.57 | 0.02 | 0.22 | 0.24 | 18  |
| 1 T07A9.9a;T07A9.9b           | 53  | 6  | 4  | 7081   | 0.48 | 0.03 | 0.28 | 0.18 | 22  |
| 22 T07A9.9a;T07A9.9b          | 16  | 5  | 1  | 22907  | 1.12 | 0.39 | 0.54 | 0.15 | 7   |
| 10 T07A9.9a;T07A9.9b          | 23  | 2  | 1  | 3758   | 1.63 | 0.16 | 0.50 | 0.10 | 6   |
| 22 T07C4.1                    | 258 | 7  | 5  | 26204  | 0.98 | 0.46 | 0.51 | 0.18 | 54  |
| 10 T07C4.1                    | 131 | 6  | 4  | 44722  | 1.43 | 0.24 | 0.50 | 0.14 | 30  |
| 7 T07C4.1                     | 118 | 2  | 2  | 2272   | 0.78 | 0.25 | 0.54 | 0.20 | 28  |
| 1 T07C4.1                     | 139 | 3  | 2  | 5056   | 1.84 | 0.05 | 0.33 | 0.22 | 22  |
| 22 T08B2.7a;T08B2.7b;T08B2.7c | 181 | 13 | 10 | 15975  | 0.82 | 0.23 | 0.54 | 0.19 | 73  |
| 1 T08B2.7a;T08B2.7b;T08B2.7c  | 50  | 4  | 1  | 4242   | 0.61 | 0.10 | 0.46 | 0.19 | 7   |
| 10 T08B2.7c;T08B2.7a;T08B2.7b | 143 | 10 | 9  | 15779  | 1.31 | 0.30 | 0.51 | 0.18 | 65  |
| 22 T08B2.9a;T08B2.9b          | 73  | 5  | 2  | 10675  | 1.44 | 0.19 | 0.51 | 0.17 | 10  |
| 10 T08B2.9a;T08B2.9b          | 37  | 4  | 1  | 9616   | 1.11 | 0.44 | 0.52 | 0.12 | 7   |
| 1 T08G2.3                     | 98  | 9  | 4  | 29473  | 0.81 | 0.28 | 0.49 | 0.16 | 23  |
| 22 T08G2.3                    | 226 | 10 | 3  | 31631  | 1.40 | 0.21 | 0.54 | 0.14 | 19  |
| 10 T08G2.3                    | 88  | 13 | 2  | 84147  | 0.86 | 0.31 | 0.51 | 0.16 | 14  |

|                      |      |    |    |         |      |      |      |      |     |
|----------------------|------|----|----|---------|------|------|------|------|-----|
| 7 T08G2.3            | 28   | 5  | 1  | 7523    | 1.00 | 0.50 | 0.50 | 0.04 | 5   |
| 22 T08H10.1          | 704  | 41 | 32 | 634162  | 0.97 | 0.45 | 0.52 | 0.14 | 308 |
| 10 T08H10.1          | 701  | 38 | 27 | 638254  | 1.30 | 0.31 | 0.52 | 0.14 | 267 |
| 7 T08H10.1           | 347  | 27 | 22 | 258987  | 1.28 | 0.28 | 0.56 | 0.16 | 183 |
| 1 T08H10.1           | 324  | 27 | 6  | 105803  | 1.01 | 0.49 | 0.49 | 0.17 | 46  |
| 22 T09A5.9           | 219  | 19 | 10 | 53090   | 0.61 | 0.04 | 0.27 | 0.19 | 79  |
| 10 T09A5.9           | 151  | 8  | 3  | 63248   | 0.85 | 0.30 | 0.51 | 0.14 | 27  |
| 7 T09A5.9            | 70   | 2  | 1  | 1930    | 0.75 | 0.21 | 0.54 | 0.16 | 10  |
| 10 T09B4.8           | 746  | 18 | 16 | 60466   | 0.93 | 0.39 | 0.52 | 0.18 | 159 |
| 7 T09B4.8            | 374  | 14 | 14 | 31901   | 0.60 | 0.08 | 0.45 | 0.14 | 120 |
| 1 T09B4.8            | 455  | 15 | 12 | 40637   | 1.42 | 0.18 | 0.50 | 0.16 | 95  |
| 22 T09B4.8           | 477  | 14 | 12 | 33274   | 0.70 | 0.10 | 0.44 | 0.17 | 98  |
| 22 T09F3.3;F33H1.2   | 1125 | 40 | 30 | 1780650 | 0.78 | 0.18 | 0.51 | 0.12 | 298 |
| 7 T09F3.3;F33H1.2    | 564  | 19 | 18 | 531625  | 0.97 | 0.46 | 0.51 | 0.13 | 186 |
| 10 T09F3.3;F33H1.2   | 503  | 26 | 13 | 1433900 | 0.78 | 0.22 | 0.50 | 0.13 | 120 |
| 1 T09F3.3;F33H1.2    | 334  | 15 | 1  | 330054  | 1.55 | 0.12 | 0.50 | 0.17 | 6   |
| 10 T10B5.5a;T10B5.5b | 280  | 19 | 13 | 97142   | 1.17 | 0.39 | 0.52 | 0.14 | 111 |
| 22 T10B5.5a;T10B5.5b | 204  | 15 | 12 | 65165   | 0.99 | 0.48 | 0.51 | 0.15 | 101 |
| 7 T10B5.5a;T10B5.5b  | 162  | 9  | 5  | 64566   | 1.46 | 0.18 | 0.52 | 0.15 | 53  |
| 1 T10B5.5a;T10B5.5b  | 175  | 12 | 5  | 34076   | 1.28 | 0.26 | 0.49 | 0.14 | 39  |
| 7 T10B9.10           | 16   | 2  | 2  | 2284    | 0.43 | 0.01 | 0.14 | 0.25 | 9   |
| 1 T10E9.7a;T10E9.7b  | 24   | 2  | 1  | 4099    | 1.06 | 0.46 | 0.50 | 0.16 | 8   |
| 22 T10E9.7a;T10E9.7b | 28   | 2  | 1  | 3464    | 1.23 | 0.31 | 0.53 | 0.22 | 8   |
| 22 T10F2.1a          | 460  | 24 | 21 | 92342   | 0.92 | 0.37 | 0.55 | 0.17 | 186 |
| 7 T10F2.1a           | 195  | 6  | 6  | 14842   | 0.83 | 0.30 | 0.55 | 0.12 | 69  |
| 1 T10F2.1a           | 176  | 9  | 4  | 8247    | 1.12 | 0.39 | 0.52 | 0.18 | 37  |
| 10 T10F2.1a;T10F2.1b | 485  | 18 | 17 | 58935   | 0.97 | 0.43 | 0.51 | 0.14 | 160 |
| 10 T10F2.4           | 37   | 2  | 2  | 5961    | 5.86 | 0.00 | 0.00 | 0.33 | 17  |
| 7 T12D8.8            | 58   | 7  | 3  | 20225   | 1.07 | 0.44 | 0.51 | 0.12 | 15  |
| 1 T12D8.8            | 76   | 7  | 2  | 24189   | 1.08 | 0.44 | 0.51 | 0.15 | 10  |
| 10 T12D8.8           | 43   | 6  | 1  | 27901   | 1.57 | 0.18 | 0.49 | 0.21 | 7   |
| 22 T12D8.8           | 67   | 9  | 1  | 27498   | 0.79 | 0.20 | 0.52 | 0.17 | 8   |
| 7 T12D8.9a;T12D8.9b  | 15   | 4  | 1  | 11566   | 0.89 | 0.37 | 0.52 | 0.28 | 4   |
| 22 T14D7.1           | 55   | 4  | 1  | 9058    | 1.04 | 0.47 | 0.51 | 0.08 | 9   |

|                      |      |     |     |        |      |      |      |      |     |
|----------------------|------|-----|-----|--------|------|------|------|------|-----|
| 10 T14D7.1           | 95   | 6   | 1   | 5829   | 0.69 | 0.14 | 0.50 | 0.07 | 7   |
| 22 T14F9.1           | 317  | 18  | 13  | 43427  | 0.81 | 0.23 | 0.54 | 0.16 | 131 |
| 1 T14F9.1            | 440  | 17  | 12  | 24404  | 0.92 | 0.40 | 0.52 | 0.18 | 110 |
| 7 T14F9.1            | 458  | 22  | 8   | 31842  | 0.92 | 0.40 | 0.52 | 0.17 | 73  |
| 10 T14F9.1           | 221  | 7   | 4   | 14056  | 1.27 | 0.32 | 0.52 | 0.14 | 37  |
| 1 T14G8.3a;T14G8.3b  | 139  | 18  | 5   | 37223  | 1.39 | 0.20 | 0.52 | 0.19 | 34  |
| 10 T14G8.3b;T14G8.3a | 705  | 27  | 21  | 136536 | 1.05 | 0.49 | 0.50 | 0.17 | 180 |
| 22 T14G8.3b;T14G8.3a | 570  | 27  | 18  | 94004  | 2.24 | 0.02 | 0.22 | 0.16 | 173 |
| 7 T14G8.3b;T14G8.3a  | 197  | 14  | 7   | 32528  | 0.27 | 0.00 | 0.01 | 0.21 | 50  |
| 10 T16G1.11          | 592  | 25  | 17  | 79454  | 1.04 | 0.50 | 0.50 | 0.16 | 159 |
| 22 T16G1.11          | 324  | 23  | 12  | 52555  | 0.87 | 0.30 | 0.54 | 0.14 | 104 |
| 1 T16G1.11           | 132  | 8   | 4   | 7848   | 0.59 | 0.08 | 0.43 | 0.18 | 40  |
| 7 T16G1.11           | 81   | 4   | 2   | 4159   | 1.23 | 0.31 | 0.55 | 0.19 | 11  |
| 22 T17E9.2a;T17E9.2b | 39   | 3   | 1   | 1277   | 0.85 | 0.27 | 0.54 | 0.26 | 5   |
| 1 T18D3.4            | 114  | 12  | 7   | 29206  | 1.32 | 0.24 | 0.50 | 0.19 | 39  |
| 22 T18D3.4           | 123  | 10  | 4   | 63759  | 0.85 | 0.28 | 0.54 | 0.24 | 28  |
| 10 T18D3.4           | 147  | 11  | 3   | 60456  | 1.04 | 0.49 | 0.50 | 0.12 | 29  |
| 22 T18H9.2a;T18H9.2b | 871  | 12  | 9   | 103896 | 1.75 | 0.08 | 0.39 | 0.14 | 120 |
| 7 T18H9.2a;T18H9.2b  | 399  | 9   | 8   | 21248  | 0.86 | 0.33 | 0.54 | 0.15 | 76  |
| 10 T18H9.2a;T18H9.2b | 627  | 10  | 8   | 50166  | 1.62 | 0.16 | 0.50 | 0.18 | 78  |
| 1 T18H9.2a;T18H9.2b  | 250  | 8   | 2   | 17293  | 1.20 | 0.33 | 0.51 | 0.17 | 17  |
| 7 T19B10.2           | 18   | 3   | 1   | 4600   | 1.04 | 0.47 | 0.51 | 0.15 | 7   |
| 22 T19B10.2          | 62   | 4   | 1   | 8437   | 0.94 | 0.40 | 0.54 | 0.24 | 11  |
| 10 T19C4.6a;T19C4.6b | 245  | 12  | 8   | 408612 | 1.67 | 0.15 | 0.50 | 0.19 | 59  |
| 10 T19H12.2          | 46   | 8   | 1   | 10913  | 0.63 | 0.09 | 0.47 | 0.29 | 7   |
| 22 T19H12.2          | 53   | 14  | 1   | 23205  | 1.06 | 0.45 | 0.52 | 0.12 | 6   |
| 10 T20F5.2           | 365  | 14  | 9   | 89015  | 0.66 | 0.11 | 0.48 | 0.20 | 105 |
| 22 T20F5.2           | 352  | 10  | 7   | 46454  | 1.09 | 0.42 | 0.53 | 0.21 | 68  |
| 1 T20F5.2            | 284  | 7   | 6   | 10670  | 0.65 | 0.13 | 0.49 | 0.19 | 57  |
| 7 T20F5.2            | 142  | 5   | 3   | 10153  | 1.02 | 0.49 | 0.51 | 0.17 | 29  |
| 10 T20G5.1           | 431  | 24  | 19  | 29058  | 0.80 | 0.24 | 0.50 | 0.18 | 153 |
| 22 T20G5.1           | 456  | 22  | 16  | 30145  | 0.61 | 0.04 | 0.26 | 0.16 | 125 |
| 1 T20G5.1            | 25   | 6   | 3   | 7028   | 0.79 | 0.26 | 0.50 | 0.12 | 13  |
| 7 T20G5.2            | 2231 | 137 | 106 | 971413 | 0.86 | 0.33 | 0.53 | 0.15 | 808 |

|                                  |      |     |    |         |       |      |      |      |     |
|----------------------------------|------|-----|----|---------|-------|------|------|------|-----|
| 22 T20G5.2                       | 2008 | 117 | 95 | 3275500 | 0.95  | 0.41 | 0.53 | 0.15 | 746 |
| 10 T20G5.2                       | 1092 | 86  | 74 | 566533  | 1.09  | 0.45 | 0.51 | 0.16 | 597 |
| 1 T20G5.2                        | 1475 | 101 | 42 | 287741  | 0.74  | 0.21 | 0.51 | 0.14 | 315 |
| 22 T20H4.3a                      | 767  | 50  | 35 | 302948  | 1.00  | 0.49 | 0.51 | 0.15 | 276 |
| 10 T20H4.3a                      | 630  | 36  | 27 | 220999  | 1.09  | 0.46 | 0.51 | 0.15 | 213 |
| 1 T20H4.3a                       | 565  | 45  | 20 | 84195   | 1.00  | 0.48 | 0.50 | 0.19 | 130 |
| 7 T20H4.3a                       | 554  | 42  | 12 | 68156   | 0.59  | 0.07 | 0.42 | 0.24 | 75  |
| 10 T21B10.2c;T21B10.2a;T21B10.2b | 4490 | 130 | 97 | 2386310 | 0.65  | 0.10 | 0.48 | 0.18 | 901 |
| 7 T21B10.2c;T21B10.2a;T21B10.2b  | 5326 | 167 | 77 | 1370490 | 0.76  | 0.22 | 0.55 | 0.19 | 657 |
| 22 T21B10.2c;T21B10.2a;T21B10.2b | 2159 | 81  | 74 | 1784530 | 0.89  | 0.34 | 0.54 | 0.14 | 679 |
| 1 T21B10.2c;T21B10.2a;T21B10.2b  | 2053 | 70  | 50 | 916312  | 0.88  | 0.36 | 0.51 | 0.15 | 413 |
| 10 T21B10.7                      | 432  | 35  | 23 | 94655   | 1.17  | 0.39 | 0.52 | 0.19 | 192 |
| 7 T21B10.7                       | 204  | 27  | 20 | 79602   | 0.96  | 0.45 | 0.51 | 0.20 | 153 |
| 22 T21B10.7                      | 357  | 27  | 20 | 88188   | 0.68  | 0.08 | 0.39 | 0.23 | 151 |
| 1 T21B10.7                       | 538  | 42  | 18 | 64837   | 1.10  | 0.41 | 0.52 | 0.17 | 134 |
| 22 T21C12.2                      | 393  | 28  | 24 | 225127  | 1.29  | 0.27 | 0.55 | 0.17 | 199 |
| 7 T21C12.2                       | 232  | 21  | 15 | 92548   | 1.11  | 0.41 | 0.52 | 0.18 | 109 |
| 10 T21C12.2                      | 242  | 29  | 14 | 158548  | 1.57  | 0.18 | 0.50 | 0.19 | 87  |
| 1 T21C12.2                       | 250  | 26  | 12 | 54988   | 1.28  | 0.27 | 0.49 | 0.14 | 90  |
| 22 T21E3.3                       | 149  | 9   | 4  | 41650   | 5.03  | 0.00 | 0.00 | 0.43 | 5   |
| 10 T21E3.3                       | 121  | 10  | 3  | 49744   | 3.94  | 0.00 | 0.04 | 0.26 | 3   |
| 1 T21E3.3                        | 28   | 4   | 1  | 20897   | 6.32  | 0.00 | 0.00 | 0.00 | 1   |
| 7 T21E3.3                        | 40   | 8   | 1  | 22797   | 21.38 | 0.00 | 0.00 | 0.00 | 1   |
| 10 T21H3.1a                      | 213  | 17  | 14 | 205882  | 1.32  | 0.29 | 0.51 | 0.12 | 137 |
| 22 T21H3.1a                      | 264  | 14  | 11 | 67765   | 1.09  | 0.42 | 0.53 | 0.18 | 103 |
| 7 T21H3.1a                       | 150  | 9   | 7  | 25500   | 0.84  | 0.31 | 0.54 | 0.21 | 51  |
| 1 T21H3.1a;T21H3.1b              | 216  | 16  | 14 | 54303   | 0.73  | 0.20 | 0.52 | 0.17 | 110 |
| 10 T22B11.5                      | 1383 | 43  | 36 | 95878   | 1.24  | 0.34 | 0.51 | 0.17 | 314 |
| 22 T22B11.5                      | 1665 | 47  | 35 | 110775  | 1.18  | 0.35 | 0.55 | 0.21 | 300 |
| 1 T22B11.5                       | 339  | 14  | 13 | 22224   | 1.13  | 0.39 | 0.52 | 0.17 | 86  |
| 7 T22B11.5                       | 191  | 13  | 2  | 17216   | 0.97  | 0.45 | 0.52 | 0.15 | 11  |
| 1 T22D1.10                       | 280  | 19  | 3  | 39664   | 1.00  | 0.48 | 0.50 | 0.13 | 22  |
| 10 T22D1.10                      | 365  | 24  | 3  | 195504  | 1.14  | 0.42 | 0.51 | 0.18 | 28  |
| 22 T22D1.10                      | 371  | 26  | 3  | 305772  | 0.69  | 0.09 | 0.41 | 0.13 | 21  |

|                      |      |     |    |         |      |      |      |      |     |
|----------------------|------|-----|----|---------|------|------|------|------|-----|
| 10 T22D1.3a;T22D1.3b | 17   | 3   | 2  | 28064   | 1.67 | 0.15 | 0.49 | 0.18 | 15  |
| 10 T22D1.9           | 112  | 5   | 4  | 21262   | 1.09 | 0.46 | 0.51 | 0.12 | 24  |
| 22 T22D1.9           | 19   | 5   | 3  | 18186   | 1.12 | 0.39 | 0.54 | 0.19 | 22  |
| 1 T22D1.9            | 27   | 2   | 1  | 1784    | 1.39 | 0.20 | 0.51 | 0.04 | 4   |
| 22 T22E5.5           | 47   | 3   | 3  | 8704    | 1.07 | 0.44 | 0.52 | 0.12 | 28  |
| 1 T22F3.3a           | 275  | 37  | 20 | 88418   | 1.22 | 0.31 | 0.51 | 0.23 | 108 |
| 10 T22F3.3b;T22F3.3a | 601  | 46  | 38 | 220550  | 0.78 | 0.22 | 0.50 | 0.19 | 258 |
| 22 T22F3.3b;T22F3.3a | 1622 | 108 | 24 | 388500  | 0.98 | 0.46 | 0.52 | 0.19 | 164 |
| 7 T22F3.3b;T22F3.3a  | 324  | 36  | 13 | 108381  | 1.45 | 0.18 | 0.52 | 0.19 | 97  |
| 10 T22F3.4           | 367  | 20  | 7  | 281627  | 0.63 | 0.09 | 0.46 | 0.22 | 44  |
| 7 T22F3.4            | 268  | 9   | 6  | 110742  | 0.53 | 0.04 | 0.33 | 0.18 | 41  |
| 1 T22F3.4            | 235  | 13  | 5  | 111375  | 1.51 | 0.14 | 0.50 | 0.28 | 31  |
| 1 T22H6.2a;T22H6.2b  | 19   | 5   | 1  | 6353    | 0.46 | 0.02 | 0.24 | 0.23 | 5   |
| 10 T23D8.4           | 178  | 23  | 17 | 90855   | 1.76 | 0.12 | 0.49 | 0.18 | 117 |
| 22 T23D8.4           | 186  | 21  | 10 | 67824   | 0.73 | 0.13 | 0.49 | 0.20 | 58  |
| 1 T23D8.4            | 27   | 11  | 1  | 29805   | 1.07 | 0.45 | 0.51 | 0.15 | 5   |
| 1 T23E7.2c;T23E7.2e  | 19   | 17  | 1  | 1015060 | 0.17 | 0.00 | 0.00 | 0.38 | 4   |
| 10 T23G5.1           | 96   | 3   | 1  | 16084   | 1.41 | 0.25 | 0.50 | 0.11 | 6   |
| 1 T24H7.2            | 140  | 8   | 7  | 10221   | 2.04 | 0.03 | 0.27 | 0.22 | 39  |
| 22 T24H7.2           | 136  | 8   | 6  | 19118   | 2.52 | 0.01 | 0.14 | 0.21 | 40  |
| 10 T24H7.2;F30B5.1   | 240  | 14  | 12 | 39336   | 1.08 | 0.46 | 0.50 | 0.18 | 97  |
| 7 T24H7.2;F30B5.1    | 96   | 8   | 3  | 16920   | 1.98 | 0.04 | 0.34 | 0.10 | 16  |
| 22 T25B9.1           | 77   | 7   | 5  | 29142   | 0.80 | 0.21 | 0.54 | 0.30 | 35  |
| 22 T25B9.9           | 237  | 20  | 17 | 59351   | 0.81 | 0.22 | 0.54 | 0.18 | 157 |
| 10 T25B9.9           | 417  | 29  | 16 | 116864  | 1.42 | 0.24 | 0.50 | 0.19 | 141 |
| 7 T25B9.9            | 567  | 39  | 11 | 105715  | 0.71 | 0.17 | 0.51 | 0.21 | 85  |
| 1 T25B9.9            | 172  | 13  | 6  | 38621   | 1.17 | 0.35 | 0.50 | 0.14 | 53  |
| 7 T25C8.2            | 442  | 46  | 29 | 643463  | 1.60 | 0.12 | 0.48 | 0.14 | 196 |
| 22 T25C8.2           | 894  | 73  | 4  | 1693400 | 0.67 | 0.07 | 0.37 | 0.16 | 39  |
| 10 T25C8.2           | 870  | 72  | 1  | 1286800 | 1.00 | 0.46 | 0.50 | 0.13 | 7   |
| 22 T25G12.5          | 227  | 12  | 7  | 64286   | 0.81 | 0.23 | 0.54 | 0.15 | 70  |
| 10 T25G12.5          | 220  | 15  | 6  | 59471   | 0.81 | 0.25 | 0.50 | 0.20 | 45  |
| 7 T25G12.5           | 28   | 3   | 1  | 11878   | 1.21 | 0.33 | 0.54 | 0.23 | 7   |
| 1 T26C5.1            | 136  | 8   | 2  | 28372   | 1.23 | 0.30 | 0.50 | 0.14 | 17  |

|                               |     |    |    |        |      |      |      |      |     |
|-------------------------------|-----|----|----|--------|------|------|------|------|-----|
| 7 T26C5.1                     | 185 | 9  | 2  | 91663  | 0.66 | 0.13 | 0.47 | 0.17 | 21  |
| 22 T26C5.1                    | 187 | 9  | 2  | 87481  | 0.73 | 0.12 | 0.48 | 0.12 | 35  |
| 10 T26C5.1                    | 51  | 9  | 1  | 127868 | 2.36 | 0.03 | 0.27 | 0.06 | 10  |
| 10 T27A10.3a;T27A10.3b        | 46  | 2  | 2  | 9392   | 3.01 | 0.01 | 0.12 | 0.21 | 17  |
| 22 T27A3.2                    | 24  | 10 | 3  | 44327  | 1.97 | 0.05 | 0.29 | 0.10 | 22  |
| 7 T27A3.2                     | 37  | 11 | 3  | 19910  | 2.70 | 0.01 | 0.10 | 0.13 | 27  |
| 10 T27A3.2                    | 39  | 7  | 3  | 26414  | 1.49 | 0.21 | 0.50 | 0.11 | 18  |
| 1 T27A3.2                     | 24  | 10 | 2  | 18967  | 1.13 | 0.39 | 0.52 | 0.22 | 9   |
| 22 T27E9.1a;T27E9.1c;T27E9.1b | 849 | 35 | 20 | 240211 | 1.46 | 0.18 | 0.51 | 0.16 | 150 |
| 1 T27E9.1a;T27E9.1c;T27E9.1b  | 614 | 23 | 18 | 37924  | 0.52 | 0.04 | 0.32 | 0.17 | 127 |
| 10 T27E9.1a;T27E9.1c;T27E9.1b | 628 | 23 | 12 | 226155 | 0.93 | 0.38 | 0.52 | 0.19 | 103 |
| 7 T27E9.1a;T27E9.1c;T27E9.1b  | 318 | 11 | 9  | 25893  | 1.56 | 0.14 | 0.48 | 0.11 | 78  |
| 10 T27E9.7                    | 440 | 14 | 11 | 32586  | 1.04 | 0.49 | 0.50 | 0.13 | 100 |
| 22 T27E9.7                    | 315 | 10 | 7  | 22792  | 0.85 | 0.28 | 0.54 | 0.14 | 48  |
| 1 T27E9.7                     | 92  | 7  | 4  | 8668   | 1.12 | 0.40 | 0.52 | 0.16 | 20  |
| 7 T27E9.7                     | 66  | 4  | 2  | 5302   | 0.81 | 0.28 | 0.55 | 0.14 | 11  |
| 22 T28D9.1                    | 395 | 5  | 5  | 145410 | 1.00 | 0.49 | 0.50 | 0.13 | 93  |
| 10 T28D9.1                    | 386 | 4  | 4  | 185827 | 1.47 | 0.22 | 0.50 | 0.12 | 94  |
| 1 T28D9.1                     | 107 | 4  | 1  | 42312  | 0.89 | 0.36 | 0.51 | 0.09 | 17  |
| 1 T28H10.3                    | 13  | 2  | 1  | 25192  | 0.73 | 0.20 | 0.51 | 0.37 | 8   |
| 10 T28H10.3                   | 37  | 4  | 1  | 8131   | 1.10 | 0.45 | 0.51 | 0.13 | 9   |
| 22 VF13D12L.1                 | 103 | 9  | 6  | 78482  | 0.89 | 0.34 | 0.54 | 0.19 | 58  |
| 7 VF13D12L.1                  | 151 | 6  | 5  | 12746  | 0.84 | 0.31 | 0.54 | 0.26 | 43  |
| 10 VF13D12L.1                 | 50  | 7  | 4  | 16090  | 1.27 | 0.33 | 0.51 | 0.15 | 25  |
| 1 VF13D12L.1                  | 64  | 4  | 2  | 18265  | 2.05 | 0.03 | 0.28 | 0.14 | 11  |
| 1 VF13D12L.3                  | 57  | 5  | 1  | 2398   | 1.03 | 0.49 | 0.49 | 0.11 | 10  |
| 10 W02B12.10                  | 62  | 3  | 1  | 5058   | 1.84 | 0.10 | 0.48 | 0.08 | 6   |
| 22 W03C9.3                    | 49  | 3  | 1  | 4614   | 0.93 | 0.39 | 0.54 | 0.09 | 8   |
| 22 W03D2.4                    | 214 | 12 | 3  | 17576  | 1.27 | 0.28 | 0.54 | 0.14 | 19  |
| 1 W03D2.4                     | 68  | 4  | 1  | 4770   | 2.48 | 0.01 | 0.15 | 0.18 | 5   |
| 22 W03F8.10                   | 95  | 8  | 3  | 11014  | 0.96 | 0.44 | 0.52 | 0.25 | 21  |
| 7 W03F8.10                    | 37  | 5  | 1  | 135946 | 0.50 | 0.03 | 0.28 | 0.16 | 4   |
| 22 W03G9.4                    | 309 | 12 | 8  | 37490  | 1.28 | 0.27 | 0.54 | 0.19 | 78  |
| 10 W03G9.4                    | 266 | 12 | 7  | 65103  | 0.79 | 0.23 | 0.50 | 0.17 | 64  |

|                                                |      |    |    |        |      |      |      |      |     |
|------------------------------------------------|------|----|----|--------|------|------|------|------|-----|
| 7 W03G9.4                                      | 30   | 5  | 1  | 6173   | 0.92 | 0.40 | 0.52 | 0.23 | 9   |
| 1 W03G9.4                                      | 91   | 10 | 1  | 12141  | 0.71 | 0.18 | 0.50 | 0.22 | 4   |
| 22 W04E12.8                                    | 63   | 5  | 1  | 24371  | 0.72 | 0.12 | 0.48 | 0.09 | 7   |
| 10 W04G3.5a;W04G3.5b                           | 102  | 4  | 3  | 10783  | 3.83 | 0.00 | 0.04 | 0.14 | 28  |
| 22 W05G11.6a;W05G11.6d;W05G11.6b;W05G11.       | 564  | 72 | 59 | 329548 | 0.90 | 0.35 | 0.55 | 0.14 | 472 |
| 10 W05G11.6a;W05G11.6d;W05G11.6b;W05G11.       | 271  | 58 | 45 | 370210 | 1.03 | 0.50 | 0.50 | 0.14 | 389 |
| 1 W05G11.6a;W05G11.6d;W05G11.6b;W05G11.        | 368  | 68 | 42 | 191586 | 1.27 | 0.27 | 0.49 | 0.16 | 266 |
| 7 W05G11.6a;W05G11.6d;W05G11.6b;W05G11.        | 292  | 51 | 31 | 158255 | 1.08 | 0.43 | 0.51 | 0.14 | 233 |
| 22 W06E11.4                                    | 32   | 2  | 2  | 14032  | 1.52 | 0.15 | 0.49 | 0.17 | 15  |
| 10 W06H3.3                                     | 367  | 13 | 9  | 40428  | 1.03 | 0.50 | 0.50 | 0.14 | 69  |
| 22 W06H3.3                                     | 490  | 13 | 9  | 50897  | 1.63 | 0.11 | 0.48 | 0.14 | 76  |
| 1 W06H3.3                                      | 222  | 13 | 4  | 54954  | 0.46 | 0.02 | 0.25 | 0.15 | 28  |
| 1 W06H8.1a;W06H8.1c;W06H8.1d                   | 96   | 12 | 6  | 28093  | 0.67 | 0.14 | 0.49 | 0.18 | 47  |
| 10 W06H8.1b;W06H8.1e;W06H8.1a;W06H8.1c         | 100  | 12 | 9  | 59903  | 1.67 | 0.15 | 0.50 | 0.15 | 73  |
| 22 W06H8.1b;W06H8.1e;W06H8.1c;W06H8.1d         | 182  | 18 | 14 | 74298  | 0.72 | 0.12 | 0.48 | 0.13 | 136 |
| 7 W06H8.1b;W06H8.1e;W06H8.1c;W06H8.1f          | 111  | 19 | 1  | 22882  | 0.78 | 0.24 | 0.55 | 0.13 | 7   |
| 10 W06H8.8e;W06H8.8g;W06H8.8b                  | 325  | 46 | 8  | 594021 | 0.30 | 0.00 | 0.01 | 0.18 | 66  |
| 22 W06H8.8e;W06H8.8g;W06H8.8d;W06H8.8b         | 551  | 64 | 15 | 296163 | 0.77 | 0.18 | 0.50 | 0.19 | 110 |
| 7 W06H8.8f;W06H8.8e;W06H8.8g;W06H8.8b;T1       | 181  | 42 | 8  | 194969 | 0.61 | 0.09 | 0.45 | 0.17 | 55  |
| 1 W06H8.8f;W06H8.8e;W06H8.8g;W06H8.8d;W06H8.8b | 177  | 37 | 3  | 295518 | 0.82 | 0.29 | 0.50 | 0.15 | 19  |
| 7 W07B8.5                                      | 589  | 26 | 7  | 134932 | 1.11 | 0.40 | 0.51 | 0.13 | 52  |
| 1 W07B8.5                                      | 609  | 24 | 4  | 167220 | 1.59 | 0.11 | 0.50 | 0.12 | 30  |
| 22 W07B8.5                                     | 596  | 19 | 3  | 237325 | 2.05 | 0.04 | 0.27 | 0.14 | 23  |
| 10 W07B8.5                                     | 680  | 20 | 2  | 250030 | 1.35 | 0.28 | 0.51 | 0.15 | 23  |
| 10 W07E11.1                                    | 113  | 15 | 8  | 46764  | 2.10 | 0.06 | 0.38 | 0.13 | 50  |
| 22 W07E11.1                                    | 26   | 10 | 3  | 64438  | 2.01 | 0.04 | 0.29 | 0.13 | 19  |
| 1 W07E11.1                                     | 37   | 7  | 2  | 7101   | 1.92 | 0.04 | 0.30 | 0.23 | 11  |
| 22 W07G4.4                                     | 380  | 16 | 13 | 131834 | 0.71 | 0.11 | 0.46 | 0.15 | 106 |
| 7 W07G4.4                                      | 618  | 17 | 13 | 246770 | 0.44 | 0.01 | 0.17 | 0.22 | 95  |
| 10 W07G4.4                                     | 476  | 15 | 11 | 221743 | 0.67 | 0.12 | 0.48 | 0.14 | 103 |
| 1 W07G4.4                                      | 337  | 9  | 6  | 50755  | 1.11 | 0.41 | 0.52 | 0.16 | 44  |
| 22 W08E12.7                                    | 1353 | 60 | 51 | 260477 | 0.82 | 0.23 | 0.54 | 0.17 | 403 |
| 7 W08E12.7                                     | 149  | 18 | 11 | 30586  | 0.61 | 0.09 | 0.45 | 0.23 | 74  |
| 10 W08E12.7                                    | 275  | 18 | 7  | 67552  | 1.03 | 0.50 | 0.50 | 0.21 | 41  |

|                            |      |    |    |        |      |      |      |      |     |
|----------------------------|------|----|----|--------|------|------|------|------|-----|
| 1 W08E12.7                 | 239  | 18 | 3  | 23844  | 0.48 | 0.03 | 0.27 | 0.13 | 22  |
| 22 W08E3.3                 | 1510 | 65 | 52 | 329660 | 1.14 | 0.38 | 0.55 | 0.16 | 417 |
| 10 W08E3.3                 | 371  | 30 | 14 | 82359  | 1.19 | 0.38 | 0.52 | 0.29 | 80  |
| 1 W08E3.3                  | 378  | 40 | 7  | 42213  | 1.03 | 0.48 | 0.50 | 0.25 | 40  |
| 7 W08E3.3;W08E3.3b         | 454  | 44 | 29 | 92020  | 0.94 | 0.42 | 0.51 | 0.17 | 207 |
| 1 W08G11.4                 | 32   | 2  | 2  | 1663   | 1.78 | 0.06 | 0.38 | 0.22 | 11  |
| 22 W08G11.4                | 72   | 2  | 2  | 3391   | 1.22 | 0.32 | 0.53 | 0.10 | 17  |
| 10 W09B6.1a;W09B6.1b       | 830  | 49 | 40 | 103948 | 1.00 | 0.46 | 0.51 | 0.16 | 365 |
| 22 W09B6.1a;W09B6.1b       | 483  | 43 | 36 | 122395 | 1.22 | 0.32 | 0.53 | 0.18 | 303 |
| 1 W09B6.1a;W09B6.1b        | 136  | 16 | 13 | 21804  | 1.32 | 0.24 | 0.50 | 0.15 | 93  |
| 7 W09B6.1a;W09B6.1b        | 142  | 16 | 13 | 37300  | 1.18 | 0.35 | 0.52 | 0.20 | 106 |
| 1 W09H1.5                  | 161  | 6  | 2  | 9630   | 0.82 | 0.29 | 0.50 | 0.23 | 13  |
| 1 W09H1.6a;W09H1.6b        | 83   | 11 | 9  | 19419  | 0.96 | 0.44 | 0.51 | 0.23 | 63  |
| 10 W09H1.6a;W09H1.6b       | 161  | 9  | 7  | 45160  | 1.05 | 0.49 | 0.50 | 0.17 | 66  |
| 22 W09H1.6a;W09H1.6b       | 39   | 8  | 5  | 29371  | 1.15 | 0.37 | 0.55 | 0.18 | 34  |
| 22 W10C8.5                 | 1096 | 46 | 41 | 548813 | 0.68 | 0.08 | 0.39 | 0.15 | 399 |
| 10 W10C8.5;F32B5.1         | 1002 | 43 | 38 | 544217 | 0.94 | 0.40 | 0.51 | 0.14 | 382 |
| 7 W10C8.5;F32B5.1          | 759  | 37 | 35 | 356211 | 0.82 | 0.29 | 0.55 | 0.16 | 343 |
| 7 Y102A5A.1                | 80   | 7  | 4  | 16954  | 0.63 | 0.10 | 0.46 | 0.15 | 22  |
| 22 Y102A5A.1               | 87   | 8  | 3  | 27490  | 5.32 | 0.00 | 0.00 | 0.15 | 14  |
| 1 Y102A5A.1                | 28   | 4  | 2  | 8341   | 0.83 | 0.30 | 0.51 | 0.07 | 11  |
| 10 Y102A5A.1;F13E9.14      | 131  | 11 | 7  | 36883  | 1.78 | 0.11 | 0.48 | 0.18 | 47  |
| 10 Y105C5B.28a;Y105C5B.28b | 54   | 12 | 6  | 146460 | 1.15 | 0.41 | 0.51 | 0.21 | 48  |
| 22 Y105C5B.28b             | 94   | 17 | 12 | 145013 | 1.32 | 0.25 | 0.55 | 0.21 | 96  |
| 1 Y105C5B.28b              | 71   | 7  | 7  | 28486  | 1.20 | 0.32 | 0.51 | 0.13 | 78  |
| 7 Y105C5B.28b;Y105C5B.28a  | 25   | 5  | 2  | 35791  | 1.82 | 0.07 | 0.41 | 0.18 | 23  |
| 10 Y105C5B.9               | 21   | 2  | 2  | 7149   | 0.63 | 0.09 | 0.47 | 0.20 | 19  |
| 22 Y105C5B.9               | 27   | 2  | 1  | 1514   | 1.13 | 0.38 | 0.55 | 0.07 | 4   |
| 10 Y105E8A.19              | 369  | 14 | 12 | 18675  | 1.16 | 0.40 | 0.51 | 0.14 | 106 |
| 22 Y105E8A.19              | 159  | 11 | 4  | 27675  | 1.10 | 0.41 | 0.53 | 0.22 | 29  |
| 1 Y105E8A.19               | 161  | 6  | 2  | 5282   | 0.90 | 0.38 | 0.52 | 0.16 | 19  |
| 7 Y105E8A.19               | 57   | 7  | 1  | 11590  | 0.97 | 0.46 | 0.51 | 0.31 | 5   |
| 22 Y105E8A.22              | 21   | 4  | 1  | 6857   | 0.75 | 0.15 | 0.50 | 0.13 | 5   |
| 10 Y105E8A.22              | 28   | 4  | 1  | 10649  | 0.58 | 0.06 | 0.37 | 0.11 | 7   |

|                                                |      |    |    |        |      |      |      |      |     |
|------------------------------------------------|------|----|----|--------|------|------|------|------|-----|
| 22 Y105E8A.4                                   | 97   | 3  | 1  | 14345  | 1.55 | 0.14 | 0.49 | 0.09 | 10  |
| 7 Y105E8B.1a;Y105E8B.1d;Y105E8B.1b             | 94   | 5  | 4  | 37730  | 0.96 | 0.45 | 0.51 | 0.11 | 50  |
| 22 Y105E8B.1a;Y105E8B.1d;Y105E8B.1b;Y105E8B.1f | 247  | 12 | 10 | 95221  | 0.88 | 0.32 | 0.54 | 0.12 | 114 |
| 10 Y105E8B.1a;Y105E8B.1f                       | 350  | 14 | 8  | 84904  | 0.50 | 0.02 | 0.23 | 0.25 | 77  |
| 1 Y105E8B.1a;Y105E8B.1f                        | 60   | 7  | 3  | 30169  | 0.74 | 0.21 | 0.51 | 0.12 | 31  |
| 1 Y105E8B.5                                    | 1039 | 30 | 23 | 61249  | 0.98 | 0.46 | 0.50 | 0.16 | 232 |
| 22 Y105E8B.5                                   | 1168 | 32 | 23 | 164240 | 1.24 | 0.30 | 0.54 | 0.13 | 289 |
| 10 Y105E8B.5                                   | 1161 | 30 | 17 | 142379 | 0.99 | 0.45 | 0.51 | 0.21 | 181 |
| 7 Y105E8B.5                                    | 656  | 21 | 13 | 63749  | 0.99 | 0.48 | 0.51 | 0.14 | 142 |
| 10 Y106G6H.2a;Y106G6H.2b;Y106G6H.2c            | 305  | 25 | 21 | 109495 | 1.36 | 0.27 | 0.51 | 0.15 | 195 |
| 22 Y106G6H.2a;Y106G6H.2b;Y106G6H.2c            | 207  | 19 | 14 | 89812  | 0.97 | 0.45 | 0.52 | 0.11 | 122 |
| 1 Y106G6H.2a;Y106G6H.2b;Y106G6H.2c             | 217  | 20 | 11 | 50305  | 1.22 | 0.31 | 0.51 | 0.12 | 95  |
| 7 Y106G6H.2a;Y106G6H.2b;Y106G6H.2c             | 153  | 15 | 5  | 36507  | 1.23 | 0.31 | 0.54 | 0.25 | 32  |
| 10 Y110A7A.14                                  | 221  | 15 | 9  | 43523  | 0.89 | 0.34 | 0.51 | 0.16 | 84  |
| 7 Y110A7A.14                                   | 275  | 8  | 8  | 16126  | 1.05 | 0.46 | 0.51 | 0.18 | 86  |
| 22 Y110A7A.14                                  | 176  | 12 | 4  | 68312  | 1.84 | 0.07 | 0.34 | 0.16 | 25  |
| 22 Y110A7A.19                                  | 163  | 8  | 5  | 11914  | 0.74 | 0.14 | 0.49 | 0.15 | 45  |
| 10 Y110A7A.19                                  | 19   | 6  | 1  | 11394  | 2.41 | 0.03 | 0.26 | 0.12 | 5   |
| 22 Y110A7A.6a                                  | 92   | 3  | 1  | 46594  | 0.59 | 0.03 | 0.24 | 0.18 | 4   |
| 10 Y110A7A.6a                                  | 93   | 10 | 1  | 70814  | 0.89 | 0.34 | 0.51 | 0.14 | 10  |
| 1 Y110A7A.6b                                   | 98   | 7  | 5  | 43761  | 0.67 | 0.14 | 0.49 | 0.16 | 55  |
| 7 Y110A7A.6b                                   | 89   | 11 | 1  | 26729  | 0.40 | 0.01 | 0.10 | 0.52 | 4   |
| 1 Y113G7A.9a                                   | 41   | 4  | 3  | 7241   | 0.69 | 0.16 | 0.50 | 0.17 | 27  |
| 10 Y113G7A.9a                                  | 72   | 5  | 3  | 24903  | 1.05 | 0.49 | 0.50 | 0.14 | 29  |
| 22 Y113G7B.17                                  | 899  | 26 | 20 | 224168 | 0.94 | 0.41 | 0.53 | 0.13 | 224 |
| 10 Y113G7B.17                                  | 492  | 17 | 16 | 120328 | 0.54 | 0.04 | 0.28 | 0.27 | 126 |
| 7 Y113G7B.17                                   | 341  | 16 | 14 | 84456  | 0.74 | 0.20 | 0.53 | 0.16 | 138 |
| 1 Y113G7B.17                                   | 192  | 12 | 6  | 55646  | 0.25 | 0.00 | 0.01 | 0.23 | 61  |
| 22 Y116A8A.9                                   | 150  | 8  | 6  | 34115  | 1.29 | 0.27 | 0.55 | 0.16 | 57  |
| 10 Y116A8A.9                                   | 67   | 4  | 3  | 10535  | 1.19 | 0.38 | 0.52 | 0.13 | 34  |
| 1 Y116A8A.9                                    | 121  | 4  | 2  | 3455   | 0.69 | 0.16 | 0.50 | 0.16 | 18  |
| 22 Y116A8C.28c                                 | 36   | 3  | 1  | 9447   | 1.30 | 0.26 | 0.55 | 0.14 | 5   |
| 22 Y17G7B.7                                    | 1096 | 36 | 26 | 607933 | 0.82 | 0.23 | 0.54 | 0.21 | 292 |
| 1 Y17G7B.7                                     | 876  | 32 | 18 | 78654  | 1.18 | 0.34 | 0.51 | 0.18 | 156 |

|                                              |      |     |     |         |      |      |      |      |      |
|----------------------------------------------|------|-----|-----|---------|------|------|------|------|------|
| 10 Y17G7B.7                                  | 680  | 26  | 17  | 515701  | 0.98 | 0.44 | 0.52 | 0.14 | 174  |
| 7 Y17G7B.7                                   | 686  | 25  | 17  | 128153  | 1.16 | 0.36 | 0.52 | 0.14 | 172  |
| 1 Y18D10A.17                                 | 636  | 18  | 13  | 25541   | 0.66 | 0.13 | 0.49 | 0.14 | 91   |
| 22 Y18D10A.17                                | 411  | 11  | 10  | 26900   | 1.39 | 0.21 | 0.53 | 0.16 | 78   |
| 10 Y18D10A.17                                | 429  | 13  | 10  | 35495   | 1.27 | 0.33 | 0.51 | 0.18 | 85   |
| 7 Y18D10A.17                                 | 120  | 6   | 4   | 12601   | 1.98 | 0.05 | 0.33 | 0.19 | 36   |
| 22 Y18H1A.4                                  | 34   | 3   | 1   | 12306   | 1.86 | 0.06 | 0.34 | 0.16 | 8    |
| 7 Y22D7AL.5a                                 | 6737 | 176 | 146 | 904768  | 0.74 | 0.20 | 0.52 | 0.17 | 1314 |
| 10 Y22D7AL.5a                                | 5831 | 156 | 142 | 1207270 | 0.78 | 0.22 | 0.49 | 0.15 | 1466 |
| 22 Y22D7AL.5a                                | 6057 | 150 | 132 | 1004300 | 0.93 | 0.39 | 0.54 | 0.15 | 1409 |
| 1 Y22D7AL.5a                                 | 5086 | 136 | 115 | 459157  | 0.93 | 0.41 | 0.52 | 0.14 | 1090 |
| 22 Y23H5A.7b;Y23H5A.7a                       | 173  | 21  | 9   | 69508   | 1.02 | 0.48 | 0.51 | 0.21 | 69   |
| 7 Y23H5A.7b;Y23H5A.7a                        | 106  | 11  | 8   | 31894   | 0.97 | 0.46 | 0.51 | 0.16 | 54   |
| 10 Y23H5A.7b;Y23H5A.7a                       | 155  | 21  | 8   | 78421   | 1.13 | 0.42 | 0.51 | 0.19 | 63   |
| 1 Y23H5A.7b;Y23H5A.7a                        | 99   | 18  | 7   | 29355   | 0.30 | 0.00 | 0.04 | 0.28 | 34   |
| 10 Y24D9A.4a;Y24D9A.4c;Y73B3A.18a;Y73B3A.18b | 436  | 43  | 35  | 764210  | 1.57 | 0.18 | 0.49 | 0.15 | 261  |
| 1 Y24D9A.4a;Y24D9A.4c;Y73B3A.18a;Y73B3A.18b  | 285  | 29  | 24  | 291520  | 1.18 | 0.34 | 0.51 | 0.20 | 141  |
| 22 Y24D9A.4a;Y24D9A.4c;Y73B3A.18b            | 434  | 50  | 40  | 689997  | 1.52 | 0.15 | 0.49 | 0.21 | 270  |
| 7 Y24D9A.4c;Y73B3A.18b                       | 261  | 26  | 22  | 134417  | 1.29 | 0.27 | 0.56 | 0.20 | 154  |
| 22 Y24D9A.8a;Y24D9A.8b                       | 1909 | 68  | 51  | 243242  | 1.00 | 0.48 | 0.51 | 0.17 | 529  |
| 10 Y24D9A.8a;Y24D9A.8b                       | 1636 | 59  | 43  | 228484  | 0.95 | 0.40 | 0.51 | 0.19 | 398  |
| 1 Y24D9A.8a;Y24D9A.8b                        | 2554 | 54  | 39  | 89793   | 1.31 | 0.25 | 0.49 | 0.17 | 468  |
| 7 Y24D9A.8a;Y24D9A.8b                        | 1643 | 46  | 38  | 129111  | 1.04 | 0.47 | 0.51 | 0.15 | 403  |
| 22 Y24F12A.2                                 | 21   | 3   | 1   | 16543   | 0.52 | 0.01 | 0.12 | 0.10 | 6    |
| 10 Y24F12A.2                                 | 40   | 6   | 1   | 52650   | 1.10 | 0.44 | 0.51 | 0.09 | 10   |
| 10 Y32H12A.8                                 | 51   | 8   | 1   | 41907   | 4.38 | 0.00 | 0.02 | 0.42 | 4    |
| 10 Y37A1B.1a                                 | 63   | 2   | 2   | 5869    | 2.12 | 0.06 | 0.37 | 0.14 | 17   |
| 22 Y37E3.10                                  | 247  | 14  | 6   | 74678   | 0.44 | 0.00 | 0.03 | 0.27 | 45   |
| 1 Y37E3.10                                   | 189  | 6   | 2   | 7658    | 1.89 | 0.04 | 0.30 | 0.15 | 16   |
| 7 Y37E3.10                                   | 27   | 5   | 1   | 4927    | 0.65 | 0.12 | 0.48 | 0.25 | 4    |
| 22 Y37E3.17a;Y37E3.17b                       | 413  | 26  | 23  | 81244   | 0.95 | 0.43 | 0.53 | 0.18 | 163  |
| 10 Y37E3.17a;Y37E3.17b                       | 458  | 30  | 22  | 95363   | 0.79 | 0.23 | 0.50 | 0.18 | 144  |
| 1 Y37E3.17a;Y37E3.17b                        | 28   | 14  | 2   | 40727   | 1.11 | 0.40 | 0.52 | 0.16 | 11   |
| 10 Y38A10A.5                                 | 1444 | 78  | 44  | 638267  | 0.64 | 0.10 | 0.48 | 0.16 | 372  |

|                          |      |    |    |        |      |      |      |      |     |
|--------------------------|------|----|----|--------|------|------|------|------|-----|
| 7 Y38A10A.5              | 1835 | 85 | 31 | 617829 | 0.88 | 0.36 | 0.52 | 0.19 | 259 |
| 22 Y38A10A.5             | 657  | 33 | 22 | 419317 | 1.03 | 0.48 | 0.51 | 0.13 | 216 |
| 1 Y38A10A.5              | 495  | 25 | 13 | 381327 | 1.21 | 0.32 | 0.51 | 0.13 | 122 |
| 10 Y38A8.2               | 33   | 2  | 1  | 2206   | 0.51 | 0.03 | 0.24 | 0.26 | 5   |
| 22 Y38A8.2               | 74   | 4  | 1  | 6251   | 0.87 | 0.31 | 0.54 | 0.12 | 10  |
| 22 Y38F1A.6              | 218  | 15 | 12 | 43559  | 1.25 | 0.29 | 0.54 | 0.14 | 98  |
| 10 Y38F1A.6              | 113  | 5  | 2  | 26727  | 0.74 | 0.18 | 0.50 | 0.15 | 19  |
| 1 Y38F1A.6               | 23   | 2  | 1  | 1889   | 1.22 | 0.31 | 0.51 | 0.02 | 6   |
| 10 Y38F2AL.3a;Y38F2AL.3b | 781  | 42 | 33 | 324682 | 1.03 | 0.49 | 0.50 | 0.16 | 237 |
| 22 Y38F2AL.3a;Y38F2AL.3b | 810  | 41 | 28 | 320028 | 0.97 | 0.45 | 0.52 | 0.15 | 207 |
| 7 Y38F2AL.3a;Y38F2AL.3b  | 533  | 27 | 25 | 201251 | 0.89 | 0.37 | 0.52 | 0.14 | 185 |
| 1 Y38F2AL.3a;Y38F2AL.3b  | 729  | 23 | 18 | 105424 | 0.92 | 0.39 | 0.52 | 0.11 | 157 |
| 22 Y39B6A.20             | 2230 | 63 | 52 | 847867 | 1.29 | 0.27 | 0.55 | 0.15 | 560 |
| 10 Y39B6A.20             | 1573 | 42 | 37 | 606004 | 1.02 | 0.49 | 0.50 | 0.12 | 436 |
| 7 Y39B6A.20              | 1276 | 30 | 28 | 173543 | 1.07 | 0.44 | 0.51 | 0.13 | 340 |
| 1 Y39B6A.20              | 639  | 29 | 17 | 149702 | 0.88 | 0.36 | 0.51 | 0.12 | 159 |
| 22 Y39E4A.3a;Y39E4A.3b   | 85   | 7  | 3  | 7664   | 3.96 | 0.00 | 0.01 | 0.16 | 22  |
| 10 Y39E4A.3a;Y39E4A.3b   | 93   | 6  | 2  | 11053  | 1.15 | 0.41 | 0.51 | 0.11 | 19  |
| 7 Y39E4A.3a;Y39E4A.3b    | 103  | 5  | 2  | 6504   | 1.20 | 0.33 | 0.54 | 0.15 | 17  |
| 1 Y39E4A.3a;Y39E4A.3b    | 111  | 6  | 1  | 7535   | 0.90 | 0.38 | 0.52 | 0.14 | 8   |
| 10 Y39E4B.1              | 55   | 2  | 1  | 7891   | 1.41 | 0.25 | 0.50 | 0.12 | 14  |
| 10 Y39G8B.1a;Y39G8B.1b   | 304  | 12 | 12 | 32028  | 0.59 | 0.06 | 0.39 | 0.16 | 106 |
| 22 Y39G8B.1a;Y39G8B.1b   | 247  | 11 | 10 | 27664  | 0.71 | 0.11 | 0.46 | 0.18 | 71  |
| 7 Y39G8B.1a;Y39G8B.1b    | 186  | 9  | 8  | 23785  | 0.91 | 0.39 | 0.52 | 0.12 | 71  |
| 1 Y39G8B.1a;Y39G8B.1b    | 108  | 3  | 3  | 4955   | 0.73 | 0.20 | 0.50 | 0.15 | 34  |
| 10 Y40B10A.2             | 115  | 7  | 2  | 26721  | 1.23 | 0.35 | 0.51 | 0.25 | 14  |
| 22 Y40B10A.2             | 129  | 7  | 2  | 27324  | 1.13 | 0.38 | 0.55 | 0.17 | 11  |
| 7 Y40B10A.2              | 131  | 5  | 1  | 16568  | 2.99 | 0.00 | 0.07 | 0.18 | 5   |
| 7 Y41D4B.11              | 26   | 8  | 1  | 22883  | 1.18 | 0.35 | 0.53 | 0.42 | 4   |
| 22 Y41E3.10a             | 1011 | 39 | 31 | 247609 | 0.82 | 0.24 | 0.54 | 0.17 | 290 |
| 10 Y41E3.10a             | 980  | 32 | 28 | 225745 | 0.57 | 0.05 | 0.36 | 0.17 | 234 |
| 7 Y41E3.10a              | 210  | 13 | 11 | 58821  | 0.65 | 0.12 | 0.48 | 0.15 | 90  |
| 1 Y41E3.10a              | 71   | 6  | 3  | 19206  | 0.69 | 0.16 | 0.50 | 0.09 | 23  |
| 22 Y41E3.4a;Y41E3.4c     | 538  | 18 | 12 | 69598  | 1.04 | 0.47 | 0.51 | 0.17 | 117 |

|                                    |     |    |    |        |      |      |      |      |     |
|------------------------------------|-----|----|----|--------|------|------|------|------|-----|
| 7 Y41E3.4a;Y41E3.4c                | 246 | 24 | 11 | 49444  | 1.15 | 0.37 | 0.52 | 0.20 | 76  |
| 10 Y41E3.4a;Y41E3.4c               | 293 | 17 | 11 | 109221 | 1.24 | 0.34 | 0.51 | 0.13 | 100 |
| 1 Y41E3.4a;Y41E3.4c                | 200 | 11 | 7  | 21958  | 0.92 | 0.40 | 0.52 | 0.22 | 51  |
| 10 Y43B11AR.4                      | 104 | 11 | 9  | 151333 | 1.08 | 0.46 | 0.51 | 0.14 | 79  |
| 1 Y43B11AR.4                       | 116 | 5  | 2  | 54917  | 1.09 | 0.42 | 0.52 | 0.18 | 23  |
| 22 Y43B11AR.4                      | 58  | 4  | 1  | 39905  | 0.52 | 0.01 | 0.12 | 0.15 | 6   |
| 22 Y43F4B.5a                       | 882 | 30 | 29 | 71915  | 1.02 | 0.49 | 0.51 | 0.13 | 256 |
| 10 Y43F4B.5a                       | 921 | 32 | 29 | 91292  | 0.76 | 0.20 | 0.49 | 0.18 | 268 |
| 1 Y43F4B.5a                        | 390 | 19 | 14 | 10571  | 0.60 | 0.09 | 0.45 | 0.17 | 85  |
| 7 Y43F4B.5a                        | 177 | 10 | 5  | 6711   | 0.89 | 0.37 | 0.52 | 0.17 | 29  |
| 22 Y43F8C.13                       | 78  | 4  | 4  | 49119  | 1.60 | 0.12 | 0.48 | 0.21 | 36  |
| 10 Y43F8C.13                       | 85  | 5  | 4  | 67795  | 1.54 | 0.19 | 0.48 | 0.25 | 40  |
| 1 Y43F8C.13                        | 62  | 4  | 2  | 33451  | 1.04 | 0.48 | 0.50 | 0.21 | 22  |
| 7 Y43F8C.13                        | 85  | 3  | 2  | 32476  | 0.90 | 0.38 | 0.52 | 0.24 | 15  |
| 10 Y45F10D.12                      | 589 | 33 | 20 | 357075 | 0.90 | 0.35 | 0.51 | 0.20 | 132 |
| 22 Y45F10D.12                      | 480 | 21 | 13 | 432155 | 1.15 | 0.37 | 0.55 | 0.12 | 118 |
| 7 Y45F10D.12                       | 372 | 15 | 12 | 84624  | 1.27 | 0.28 | 0.56 | 0.15 | 106 |
| 1 Y45F10D.12                       | 273 | 17 | 10 | 327169 | 1.37 | 0.21 | 0.51 | 0.17 | 63  |
| 10 Y45F3A.3a;Y45F3A.3b             | 151 | 11 | 4  | 22549  | 0.76 | 0.20 | 0.49 | 0.20 | 28  |
| 1 Y45F3A.3a;Y45F3A.3b              | 52  | 8  | 3  | 6058   | 1.18 | 0.34 | 0.51 | 0.19 | 21  |
| 22 Y45F3A.3a;Y45F3A.3b             | 55  | 5  | 3  | 11343  | 1.26 | 0.29 | 0.54 | 0.13 | 21  |
| 22 Y45G12B.1a;Y45G12B.1b           | 88  | 7  | 4  | 8931   | 0.59 | 0.03 | 0.24 | 0.22 | 29  |
| 1 Y45G12B.1a;Y45G12B.1c;Y45G12B.1b | 31  | 3  | 2  | 1532   | 0.51 | 0.04 | 0.31 | 0.21 | 9   |
| 22 Y45G12C.2                       | 160 | 10 | 4  | 52772  | 0.76 | 0.16 | 0.50 | 0.14 | 25  |
| 1 Y45G12C.2                        | 106 | 9  | 3  | 28795  | 0.56 | 0.07 | 0.39 | 0.12 | 25  |
| 7 Y45G12C.2                        | 58  | 8  | 2  | 39481  | 1.67 | 0.10 | 0.46 | 0.11 | 16  |
| 10 Y45G12C.2                       | 152 | 15 | 2  | 107433 | 1.68 | 0.14 | 0.50 | 0.14 | 18  |
| 22 Y46G5A.19a;Y46G5A.19b           | 91  | 8  | 7  | 20437  | 0.98 | 0.46 | 0.51 | 0.18 | 50  |
| 10 Y46G5A.19b;Y46G5A.19a           | 75  | 11 | 7  | 50746  | 1.51 | 0.20 | 0.50 | 0.14 | 50  |
| 1 Y46G5A.19b;Y46G5A.19a            | 37  | 2  | 2  | 1898   | 2.21 | 0.02 | 0.22 | 0.17 | 11  |
| 22 Y46G5A.31                       | 358 | 13 | 10 | 28490  | 1.26 | 0.29 | 0.54 | 0.15 | 98  |
| 10 Y46G5A.31                       | 475 | 9  | 7  | 15402  | 1.35 | 0.28 | 0.51 | 0.16 | 82  |
| 1 Y46G5A.31                        | 138 | 3  | 3  | 1593   | 0.49 | 0.03 | 0.29 | 0.16 | 29  |
| 10 Y46H3A.2                        | 23  | 2  | 1  | 2199   | 4.75 | 0.00 | 0.01 | 0.39 | 4   |

|                          |      |    |    |        |      |      |      |      |     |
|--------------------------|------|----|----|--------|------|------|------|------|-----|
| 10 Y47D3A.25             | 387  | 14 | 7  | 129686 | 0.91 | 0.37 | 0.52 | 0.22 | 49  |
| 1 Y47D3A.25              | 325  | 12 | 6  | 61243  | 0.72 | 0.19 | 0.51 | 0.22 | 40  |
| 7 Y47D3A.25              | 150  | 7  | 1  | 44798  | 1.33 | 0.24 | 0.53 | 0.09 | 6   |
| 22 Y47D3B.10             | 301  | 13 | 11 | 51648  | 1.01 | 0.50 | 0.50 | 0.16 | 106 |
| 10 Y47D3B.10             | 141  | 9  | 8  | 26554  | 0.51 | 0.03 | 0.24 | 0.17 | 70  |
| 7 Y47D3B.10              | 195  | 10 | 7  | 20529  | 0.62 | 0.10 | 0.45 | 0.22 | 40  |
| 1 Y47D3B.10              | 42   | 5  | 3  | 24228  | 2.45 | 0.01 | 0.15 | 0.09 | 16  |
| 7 Y47G6A.21              | 538  | 13 | 11 | 22931  | 3.00 | 0.00 | 0.07 | 0.16 | 116 |
| 10 Y47G6A.21             | 348  | 12 | 8  | 44061  | 2.71 | 0.02 | 0.19 | 0.14 | 90  |
| 22 Y47G6A.21             | 274  | 11 | 5  | 22603  | 2.02 | 0.04 | 0.28 | 0.16 | 50  |
| 1 Y47G6A.21              | 117  | 5  | 2  | 4490   | 1.74 | 0.07 | 0.39 | 0.25 | 15  |
| 22 Y47G6A.22             | 200  | 6  | 6  | 12529  | 1.39 | 0.21 | 0.53 | 0.16 | 49  |
| 10 Y47G6A.22             | 136  | 4  | 1  | 8473   | 0.91 | 0.36 | 0.51 | 0.22 | 8   |
| 10 Y47G6A.6              | 63   | 8  | 1  | 10540  | 1.54 | 0.19 | 0.48 | 0.23 | 5   |
| 22 Y48B6A.12;F33D11.8    | 171  | 16 | 8  | 63563  | 1.23 | 0.31 | 0.53 | 0.13 | 51  |
| 1 Y48B6A.12;F33D11.8     | 59   | 17 | 7  | 27969  | 0.97 | 0.45 | 0.50 | 0.16 | 36  |
| 10 Y48B6A.12;F33D11.8    | 69   | 10 | 4  | 80231  | 1.37 | 0.27 | 0.51 | 0.11 | 25  |
| 7 Y48B6A.12;F33D11.8     | 287  | 22 | 2  | 39744  | 1.15 | 0.37 | 0.52 | 0.19 | 10  |
| 22 Y48E1B.10             | 172  | 6  | 4  | 75056  | 0.45 | 0.00 | 0.04 | 0.14 | 36  |
| 10 Y48E1B.10             | 58   | 6  | 1  | 39123  | 1.28 | 0.32 | 0.51 | 0.10 | 11  |
| 10 Y48G10A.1             | 16   | 4  | 1  | 12125  | 0.94 | 0.39 | 0.51 | 0.10 | 5   |
| 22 Y48G10A.1             | 87   | 6  | 1  | 17179  | 0.87 | 0.30 | 0.54 | 0.24 | 6   |
| 22 Y48G8AL.5             | 60   | 8  | 3  | 14968  | 0.93 | 0.39 | 0.54 | 0.23 | 12  |
| 22 Y48G8AL.8a;Y48G8AL.8b | 767  | 36 | 17 | 702079 | 1.49 | 0.16 | 0.50 | 0.15 | 154 |
| 10 Y48G8AL.8a;Y48G8AL.8b | 451  | 26 | 16 | 498381 | 1.25 | 0.34 | 0.51 | 0.21 | 122 |
| 7 Y48G8AL.8a;Y48G8AL.8b  | 224  | 15 | 11 | 68192  | 1.08 | 0.43 | 0.51 | 0.20 | 87  |
| 1 Y48G8AL.8a;Y48G8AL.8b  | 347  | 12 | 10 | 41877  | 1.67 | 0.09 | 0.45 | 0.27 | 67  |
| 22 Y49A3A.2              | 1626 | 62 | 54 | 293530 | 0.80 | 0.21 | 0.53 | 0.17 | 466 |
| 10 Y49A3A.2              | 1490 | 60 | 45 | 280388 | 0.87 | 0.32 | 0.51 | 0.18 | 366 |
| 7 Y49A3A.2               | 1104 | 40 | 33 | 150863 | 0.81 | 0.27 | 0.56 | 0.16 | 320 |
| 1 Y49A3A.2               | 852  | 37 | 31 | 84000  | 1.02 | 0.50 | 0.50 | 0.16 | 275 |
| 10 Y49E10.1              | 101  | 11 | 7  | 22476  | 1.56 | 0.18 | 0.50 | 0.16 | 69  |
| 22 Y49E10.1              | 62   | 11 | 6  | 32243  | 1.15 | 0.37 | 0.55 | 0.19 | 43  |
| 1 Y49E10.1               | 70   | 5  | 3  | 3315   | 1.34 | 0.22 | 0.50 | 0.10 | 23  |

|                          |     |    |    |        |      |      |      |      |     |
|--------------------------|-----|----|----|--------|------|------|------|------|-----|
| 10 Y50D4B.3              | 62  | 5  | 1  | 33471  | 1.83 | 0.10 | 0.48 | 0.15 | 10  |
| 10 Y50D7A.4              | 131 | 9  | 7  | 25210  | 1.29 | 0.32 | 0.51 | 0.20 | 42  |
| 1 Y50D7A.4               | 134 | 7  | 4  | 13872  | 1.90 | 0.04 | 0.32 | 0.12 | 18  |
| 22 Y50D7A.4              | 136 | 8  | 1  | 20330  | 0.25 | 0.00 | 0.00 | 0.19 | 5   |
| 10 Y53F4B.29             | 325 | 16 | 7  | 477282 | 0.64 | 0.10 | 0.48 | 0.11 | 56  |
| 22 Y53F4B.29             | 450 | 18 | 7  | 287634 | 1.09 | 0.42 | 0.53 | 0.21 | 47  |
| 1 Y53F4B.29              | 302 | 21 | 5  | 135659 | 1.00 | 0.48 | 0.50 | 0.15 | 31  |
| 7 Y53F4B.29              | 131 | 14 | 3  | 139725 | 0.49 | 0.03 | 0.27 | 0.19 | 18  |
| 1 Y53F4B.30              | 297 | 15 | 11 | 87975  | 2.63 | 0.00 | 0.12 | 0.16 | 95  |
| 22 Y53F4B.30             | 564 | 19 | 11 | 253658 | 1.24 | 0.30 | 0.54 | 0.13 | 104 |
| 7 Y53F4B.30              | 316 | 14 | 9  | 103940 | 0.86 | 0.33 | 0.54 | 0.11 | 77  |
| 10 Y53F4B.30             | 371 | 17 | 4  | 304281 | 4.11 | 0.00 | 0.03 | 0.16 | 38  |
| 22 Y53F4B.31             | 439 | 16 | 9  | 99405  | 1.09 | 0.42 | 0.53 | 0.13 | 94  |
| 7 Y53F4B.31              | 227 | 9  | 8  | 67242  | 0.84 | 0.31 | 0.55 | 0.13 | 79  |
| 10 Y53F4B.31             | 306 | 10 | 8  | 113868 | 0.80 | 0.24 | 0.50 | 0.12 | 85  |
| 1 Y53F4B.31              | 295 | 13 | 6  | 38736  | 0.83 | 0.30 | 0.51 | 0.15 | 56  |
| 10 Y53F4B.33             | 343 | 10 | 8  | 66286  | 1.55 | 0.19 | 0.49 | 0.17 | 82  |
| 1 Y53F4B.33              | 230 | 8  | 6  | 41126  | 2.44 | 0.01 | 0.15 | 0.12 | 55  |
| 22 Y53F4B.33             | 480 | 12 | 6  | 63155  | 0.98 | 0.47 | 0.51 | 0.12 | 67  |
| 7 Y53F4B.33              | 177 | 7  | 4  | 25730  | 2.03 | 0.04 | 0.32 | 0.11 | 36  |
| 10 Y53F4B.39a            | 37  | 4  | 3  | 25175  | 2.65 | 0.02 | 0.20 | 0.17 | 33  |
| 7 Y53F4B.39a             | 44  | 3  | 3  | 8810   | 0.27 | 0.00 | 0.01 | 0.41 | 15  |
| 22 Y53F4B.39a;Y53F4B.39b | 128 | 5  | 5  | 16908  | 1.08 | 0.43 | 0.52 | 0.19 | 40  |
| 1 Y53F4B.39a;Y53F4B.39b  | 49  | 3  | 2  | 8531   | 1.26 | 0.28 | 0.49 | 0.17 | 17  |
| 10 Y54E10A.3             | 134 | 13 | 2  | 103059 | 1.71 | 0.13 | 0.50 | 0.14 | 14  |
| 22 Y54E10A.6             | 23  | 4  | 2  | 10010  | 1.20 | 0.33 | 0.54 | 0.19 | 21  |
| 22 Y54E2A.11a            | 185 | 22 | 12 | 94326  | 0.97 | 0.45 | 0.52 | 0.18 | 81  |
| 10 Y54E2A.11a;Y54E2A.11b | 126 | 14 | 6  | 70033  | 0.93 | 0.38 | 0.52 | 0.13 | 50  |
| 7 Y54E2A.11a;Y54E2A.11b  | 48  | 12 | 5  | 40807  | 1.11 | 0.41 | 0.51 | 0.16 | 28  |
| 1 Y54E2A.11a;Y54E2A.11b  | 14  | 6  | 1  | 18781  | 2.53 | 0.01 | 0.15 | 0.47 | 8   |
| 22 Y54G11A.7             | 41  | 3  | 2  | 3929   | 0.86 | 0.28 | 0.54 | 0.16 | 13  |
| 10 Y54G11A.7             | 55  | 4  | 2  | 3736   | 0.69 | 0.14 | 0.51 | 0.09 | 11  |
| 1 Y54G11A.7              | 117 | 2  | 1  | 2197   | 0.78 | 0.25 | 0.49 | 0.13 | 9   |
| 22 Y54G2A.45             | 76  | 2  | 1  | 2260   | 1.01 | 0.49 | 0.51 | 0.14 | 10  |

|                            |      |    |    |        |      |      |      |      |     |
|----------------------------|------|----|----|--------|------|------|------|------|-----|
| 10 Y54G9A.6                | 32   | 3  | 2  | 3659   | 3.92 | 0.00 | 0.04 | 0.23 | 11  |
| 22 Y55B1BR.2               | 20   | 3  | 1  | 4680   | 3.17 | 0.00 | 0.04 | 0.39 | 6   |
| 22 Y55F3AM.13              | 115  | 7  | 3  | 21465  | 1.20 | 0.33 | 0.54 | 0.20 | 31  |
| 10 Y55F3AM.13              | 50   | 3  | 2  | 12419  | 1.05 | 0.49 | 0.50 | 0.08 | 16  |
| 10 Y55F3AR.3               | 1941 | 86 | 82 | 648320 | 0.93 | 0.38 | 0.52 | 0.15 | 757 |
| 22 Y55F3AR.3               | 1986 | 81 | 75 | 606998 | 0.87 | 0.31 | 0.54 | 0.14 | 729 |
| 7 Y55F3AR.3                | 1349 | 64 | 58 | 174804 | 0.93 | 0.41 | 0.51 | 0.16 | 531 |
| 1 Y55F3AR.3                | 1246 | 65 | 45 | 127009 | 0.95 | 0.43 | 0.51 | 0.15 | 342 |
| 22 Y57A10A.23              | 30   | 2  | 1  | 19532  | 0.51 | 0.01 | 0.12 | 0.12 | 9   |
| 10 Y57A10C.6               | 401  | 18 | 11 | 89606  | 0.80 | 0.25 | 0.50 | 0.12 | 103 |
| 22 Y57A10C.6               | 400  | 16 | 8  | 46626  | 0.79 | 0.19 | 0.52 | 0.14 | 55  |
| 1 Y57A10C.6                | 324  | 17 | 7  | 22589  | 0.79 | 0.26 | 0.50 | 0.14 | 46  |
| 7 Y57A10C.6                | 250  | 8  | 3  | 29657  | 0.64 | 0.11 | 0.47 | 0.15 | 24  |
| 22 Y57G11B.5               | 99   | 9  | 4  | 76309  | 1.36 | 0.23 | 0.54 | 0.12 | 41  |
| 7 Y57G11B.5                | 15   | 5  | 3  | 13726  | 0.77 | 0.23 | 0.56 | 0.11 | 30  |
| 10 Y57G11B.5               | 69   | 6  | 2  | 30357  | 1.24 | 0.34 | 0.51 | 0.11 | 21  |
| 22 Y57G11C.10b             | 154  | 14 | 9  | 113478 | 1.09 | 0.42 | 0.53 | 0.15 | 83  |
| 1 Y57G11C.10b              | 204  | 11 | 6  | 34069  | 0.71 | 0.18 | 0.50 | 0.16 | 49  |
| 10 Y57G11C.10b;Y57G11C.10a | 538  | 29 | 18 | 163591 | 0.92 | 0.37 | 0.52 | 0.16 | 175 |
| 7 Y57G11C.10b;Y57G11C.10a  | 400  | 26 | 16 | 74674  | 1.20 | 0.33 | 0.54 | 0.27 | 107 |
| 10 Y57G11C.34              | 151  | 5  | 4  | 6249   | 0.97 | 0.43 | 0.51 | 0.15 | 31  |
| 1 Y57G11C.34               | 75   | 2  | 2  | 1037   | 0.67 | 0.15 | 0.48 | 0.15 | 18  |
| 10 Y59A8B.10a              | 78   | 4  | 3  | 13881  | 1.23 | 0.36 | 0.51 | 0.15 | 17  |
| 22 Y59A8B.10a              | 35   | 3  | 1  | 8941   | 2.28 | 0.02 | 0.22 | 0.32 | 5   |
| 1 Y63D3A.5                 | 76   | 5  | 2  | 16459  | 1.42 | 0.18 | 0.50 | 0.22 | 13  |
| 10 Y63D3A.5                | 12   | 3  | 1  | 13892  | 3.22 | 0.01 | 0.09 | 0.19 | 5   |
| 10 Y65B4A.8                | 125  | 3  | 2  | 4507   | 1.33 | 0.29 | 0.51 | 0.21 | 22  |
| 22 Y65B4A.8                | 99   | 2  | 1  | 3631   | 0.99 | 0.48 | 0.51 | 0.19 | 13  |
| 1 Y65B4A.8                 | 113  | 3  | 1  | 3852   | 1.29 | 0.26 | 0.50 | 0.42 | 6   |
| 22 Y65B4BL.2               | 23   | 3  | 1  | 16364  | 3.83 | 0.00 | 0.01 | 0.21 | 5   |
| 10 Y65B4BR.5a;Y65B4BR.5b   | 1025 | 33 | 19 | 186109 | 1.17 | 0.39 | 0.52 | 0.18 | 182 |
| 22 Y65B4BR.5a;Y65B4BR.5b   | 1348 | 33 | 13 | 155285 | 1.36 | 0.22 | 0.54 | 0.11 | 146 |
| 1 Y65B4BR.5a;Y65B4BR.5b    | 663  | 31 | 10 | 61098  | 0.94 | 0.42 | 0.52 | 0.19 | 105 |
| 7 Y65B4BR.5a;Y65B4BR.5b    | 368  | 13 | 7  | 65848  | 1.02 | 0.49 | 0.51 | 0.17 | 84  |

|                                              |      |    |    |         |      |      |      |      |     |
|----------------------------------------------|------|----|----|---------|------|------|------|------|-----|
| 22 Y66A7A.6                                  | 41   | 6  | 4  | 7496    | 0.91 | 0.37 | 0.55 | 0.22 | 24  |
| 10 Y66A7A.6                                  | 148  | 3  | 2  | 3679    | 0.50 | 0.02 | 0.23 | 0.15 | 25  |
| 1 Y66A7A.6                                   | 83   | 2  | 1  | 3694    | 1.10 | 0.41 | 0.52 | 0.09 | 9   |
| 22 Y66D12A.9                                 | 148  | 11 | 5  | 37720   | 0.90 | 0.34 | 0.54 | 0.18 | 34  |
| 10 Y66D12A.9                                 | 61   | 10 | 4  | 17622   | 0.72 | 0.16 | 0.50 | 0.24 | 26  |
| 1 Y66D12A.9                                  | 24   | 4  | 2  | 4497    | 1.22 | 0.31 | 0.51 | 0.11 | 12  |
| 7 Y66D12A.9                                  | 114  | 6  | 2  | 7812    | 1.45 | 0.18 | 0.51 | 0.22 | 15  |
| 22 Y66H1B.2a;Y66H1B.2f;Y66H1B.2c;Y66H1B.2b;Y | 297  | 30 | 17 | 113752  | 0.76 | 0.16 | 0.49 | 0.15 | 129 |
| 10 Y66H1B.2a;Y66H1B.2f;Y66H1B.2g;Y66H1B.2b;Y | 32   | 8  | 4  | 25771   | 1.46 | 0.22 | 0.50 | 0.12 | 42  |
| 7 Y66H1B.2a;Y66H1B.2g;Y66H1B.2c;Y66H1B.2b;Y  | 108  | 20 | 10 | 43772   | 0.87 | 0.35 | 0.53 | 0.14 | 81  |
| 1 Y66H1B.2a;Y66H1B.2g;Y66H1B.2f;Y66H1B.2c    | 260  | 23 | 7  | 30066   | 0.93 | 0.40 | 0.52 | 0.15 | 56  |
| 1 Y69A2AR.18b;Y69A2AR.18a                    | 249  | 13 | 13 | 35175   | 0.48 | 0.03 | 0.28 | 0.15 | 88  |
| 7 Y69A2AR.18b;Y69A2AR.18a                    | 42   | 2  | 1  | 2746    | 0.92 | 0.40 | 0.52 | 0.22 | 9   |
| 22 Y69A2AR.18b;Y69A2AR.18a;Y69A2AR.18c       | 143  | 10 | 7  | 33821   | 2.13 | 0.03 | 0.25 | 0.13 | 46  |
| 7 Y69F12A.2a;Y69F12A.2b                      | 80   | 3  | 2  | 9932    | 0.67 | 0.13 | 0.48 | 0.20 | 12  |
| 1 Y69F12A.2a;Y69F12A.2b                      | 129  | 6  | 2  | 15433   | 0.69 | 0.16 | 0.48 | 0.10 | 15  |
| 10 Y69F12A.2a;Y69F12A.2b                     | 149  | 4  | 2  | 4258    | 1.68 | 0.14 | 0.49 | 0.11 | 18  |
| 22 Y69F12A.2a;Y69F12A.2b                     | 165  | 4  | 2  | 10327   | 1.28 | 0.27 | 0.54 | 0.20 | 9   |
| 1 Y6B3B.3                                    | 94   | 17 | 1  | 79811   | 2.31 | 0.01 | 0.19 | 1.01 | 4   |
| 22 Y71A12B.1                                 | 582  | 66 | 49 | 940082  | 1.08 | 0.43 | 0.52 | 0.15 | 394 |
| 10 Y71A12B.1                                 | 900  | 72 | 44 | 1168470 | 1.08 | 0.46 | 0.51 | 0.14 | 371 |
| 7 Y71A12B.1                                  | 280  | 41 | 33 | 250555  | 0.92 | 0.40 | 0.52 | 0.14 | 277 |
| 1 Y71A12B.1                                  | 286  | 44 | 27 | 538522  | 1.03 | 0.49 | 0.50 | 0.14 | 230 |
| 10 Y71A12B.17                                | 16   | 3  | 1  | 8809    | 3.67 | 0.00 | 0.05 | 0.57 | 4   |
| 10 Y71D11A.3b;Y71D11A.3a                     | 32   | 4  | 1  | 6718    | 2.95 | 0.01 | 0.13 | 0.12 | 4   |
| 22 Y71F9AL.13a;Y71F9AL.13b                   | 2040 | 70 | 48 | 701493  | 1.12 | 0.40 | 0.54 | 0.17 | 481 |
| 10 Y71F9AL.13a;Y71F9AL.13b                   | 2184 | 61 | 45 | 1133860 | 1.21 | 0.37 | 0.52 | 0.13 | 524 |
| 1 Y71F9AL.13a;Y71F9AL.13b                    | 1485 | 45 | 37 | 144388  | 1.00 | 0.48 | 0.50 | 0.15 | 380 |
| 7 Y71F9AL.13a;Y71F9AL.13b                    | 1262 | 37 | 27 | 192404  | 1.23 | 0.31 | 0.54 | 0.18 | 246 |
| 22 Y71F9AL.17                                | 27   | 4  | 2  | 26046   | 1.44 | 0.18 | 0.51 | 0.16 | 11  |
| 7 Y71F9AL.17                                 | 14   | 3  | 1  | 28132   | 1.83 | 0.07 | 0.40 | 0.13 | 4   |
| 22 Y71G12B.6                                 | 479  | 29 | 8  | 96371   | 0.85 | 0.28 | 0.54 | 0.17 | 54  |
| 10 Y71G12B.6                                 | 257  | 12 | 5  | 46737   | 1.01 | 0.48 | 0.51 | 0.20 | 30  |
| 1 Y71G12B.6                                  | 166  | 10 | 4  | 13171   | 1.32 | 0.24 | 0.50 | 0.18 | 31  |

|                            |      |    |    |        |       |      |      |      |     |
|----------------------------|------|----|----|--------|-------|------|------|------|-----|
| 7 Y71G12B.6                | 77   | 9  | 3  | 11984  | 1.05  | 0.46 | 0.51 | 0.14 | 31  |
| 7 Y71H10A.1a               | 39   | 8  | 2  | 9803   | 0.86  | 0.34 | 0.53 | 0.18 | 12  |
| 1 Y71H10A.1a;Y71H10A.1b    | 83   | 7  | 2  | 12774  | 0.94  | 0.41 | 0.52 | 0.18 | 15  |
| 10 Y71H10B.1b;Y71H10B.1a   | 41   | 7  | 2  | 49430  | 1.10  | 0.45 | 0.51 | 0.11 | 19  |
| 22 Y71H10B.1c              | 47   | 8  | 1  | 35042  | 0.60  | 0.03 | 0.26 | 0.23 | 6   |
| 10 Y71H2AM.11              | 168  | 6  | 3  | 22192  | 0.37  | 0.00 | 0.05 | 0.22 | 18  |
| 22 Y71H2AM.23              | 145  | 20 | 13 | 88371  | 0.94  | 0.41 | 0.54 | 0.18 | 96  |
| 1 Y71H2AM.23               | 212  | 29 | 10 | 106917 | 1.36  | 0.21 | 0.50 | 0.14 | 67  |
| 7 Y71H2AM.23               | 214  | 26 | 10 | 79338  | 0.85  | 0.33 | 0.54 | 0.17 | 56  |
| 10 Y71H2AM.23              | 139  | 17 | 8  | 84087  | 0.73  | 0.17 | 0.49 | 0.23 | 44  |
| 1 Y73B3A.11                | 40   | 4  | 1  | 17211  | 0.66  | 0.14 | 0.49 | 0.48 | 4   |
| 7 Y73B3B.1                 | 133  | 2  | 1  | 5688   | 0.40  | 0.01 | 0.10 | 0.48 | 4   |
| 10 Y73B6BL.24              | 249  | 16 | 6  | 115899 | 1.09  | 0.46 | 0.51 | 0.12 | 45  |
| 22 Y73B6BL.24              | 162  | 9  | 3  | 78638  | 0.80  | 0.21 | 0.53 | 0.14 | 23  |
| 7 Y73B6BL.24               | 12   | 8  | 2  | 47208  | 1.31  | 0.26 | 0.55 | 0.10 | 13  |
| 1 Y73B6BL.24               | 282  | 16 | 2  | 55703  | 1.15  | 0.37 | 0.52 | 0.06 | 13  |
| 22 Y73B6BL.6a;Y73B6BL.6b   | 35   | 3  | 1  | 92323  | 0.95  | 0.42 | 0.53 | 0.14 | 6   |
| 7 Y73B6BL.6a;Y73B6BL.6b    | 146  | 4  | 1  | 10191  | 0.82  | 0.29 | 0.55 | 0.19 | 10  |
| 10 Y74C9A.3                | 44   | 8  | 2  | 9921   | 1.31  | 0.30 | 0.51 | 0.08 | 15  |
| 7 Y76B12C.2                | 25   | 12 | 1  | 26519  | 6.78  | 0.00 | 0.00 | 0.54 | 4   |
| 10 Y80D3A.1                | 75   | 3  | 1  | 12326  | 0.69  | 0.13 | 0.50 | 0.11 | 10  |
| 10 Y82E9BR.14b;Y82E9BR.14a | 196  | 6  | 4  | 15505  | 0.42  | 0.01 | 0.10 | 0.18 | 35  |
| 1 Y82E9BR.14b;Y82E9BR.14a  | 30   | 6  | 1  | 5833   | 0.77  | 0.24 | 0.50 | 0.16 | 7   |
| 22 Y82E9BR.14b;Y82E9BR.14a | 70   | 3  | 1  | 11884  | 0.45  | 0.00 | 0.04 | 0.17 | 8   |
| 10 Y87G2A.16               | 12   | 3  | 1  | 8525   | 86.69 | 0.00 | 0.00 | 0.81 | 4   |
| 10 Y87G2A.5                | 438  | 19 | 13 | 34581  | 0.86  | 0.31 | 0.51 | 0.17 | 124 |
| 22 Y87G2A.5                | 269  | 11 | 5  | 26589  | 0.69  | 0.09 | 0.41 | 0.20 | 47  |
| 1 Y87G2A.5                 | 47   | 2  | 1  | 1282   | 0.96  | 0.44 | 0.51 | 0.13 | 7   |
| 10 Y87G2A.6                | 28   | 2  | 1  | 16951  | 0.94  | 0.39 | 0.51 | 0.23 | 9   |
| 7 Y87G2A.8a                | 879  | 33 | 29 | 202353 | 0.88  | 0.35 | 0.52 | 0.17 | 265 |
| 22 Y87G2A.8a               | 1188 | 46 | 28 | 272419 | 0.95  | 0.43 | 0.53 | 0.12 | 304 |
| 10 Y87G2A.8a               | 691  | 36 | 20 | 279467 | 0.81  | 0.25 | 0.50 | 0.13 | 213 |
| 1 Y87G2A.8a                | 576  | 28 | 11 | 97740  | 1.29  | 0.26 | 0.51 | 0.15 | 101 |
| 10 ZC101.2e;ZC101.2b       | 11   | 2  | 1  | 1952   | 0.54  | 0.04 | 0.28 | 0.11 | 5   |

|                              |      |    |    |        |      |      |      |      |     |
|------------------------------|------|----|----|--------|------|------|------|------|-----|
| 1 ZC247.1                    | 103  | 11 | 7  | 10677  | 1.98 | 0.03 | 0.30 | 0.19 | 35  |
| 10 ZC373.1                   | 124  | 11 | 7  | 28054  | 1.94 | 0.08 | 0.47 | 0.14 | 52  |
| 22 ZC373.1                   | 108  | 8  | 6  | 33519  | 0.96 | 0.43 | 0.52 | 0.17 | 44  |
| 7 ZC373.1                    | 34   | 4  | 1  | 5692   | 0.75 | 0.21 | 0.54 | 0.11 | 4   |
| 22 ZC373.4                   | 11   | 6  | 1  | 43670  | 1.07 | 0.44 | 0.52 | 0.13 | 4   |
| 10 ZC395.10                  | 70   | 10 | 2  | 111569 | 1.91 | 0.09 | 0.47 | 0.13 | 14  |
| 7 ZC395.10                   | 23   | 4  | 1  | 57038  | 2.80 | 0.01 | 0.10 | 0.12 | 6   |
| 22 ZC395.10                  | 50   | 9  | 1  | 180324 | 2.63 | 0.01 | 0.12 | 0.10 | 5   |
| 22 ZC416.6                   | 100  | 4  | 1  | 2430   | 2.47 | 0.01 | 0.15 | 0.22 | 4   |
| 22 ZC434.2                   | 1817 | 51 | 39 | 690783 | 1.12 | 0.39 | 0.54 | 0.13 | 428 |
| 10 ZC434.2                   | 956  | 43 | 32 | 843719 | 0.97 | 0.43 | 0.51 | 0.14 | 283 |
| 1 ZC434.2                    | 615  | 31 | 18 | 291193 | 0.79 | 0.26 | 0.51 | 0.13 | 172 |
| 7 ZC434.2                    | 536  | 23 | 17 | 118935 | 1.24 | 0.30 | 0.55 | 0.11 | 174 |
| 10 ZC434.5                   | 492  | 30 | 19 | 80566  | 0.84 | 0.29 | 0.51 | 0.14 | 218 |
| 22 ZC434.5                   | 271  | 19 | 12 | 78603  | 1.08 | 0.43 | 0.52 | 0.12 | 124 |
| 7 ZC434.5                    | 174  | 10 | 4  | 23384  | 0.72 | 0.18 | 0.51 | 0.20 | 44  |
| 1 ZC434.5                    | 186  | 8  | 3  | 13535  | 0.66 | 0.13 | 0.49 | 0.11 | 41  |
| 10 ZC434.8                   | 505  | 21 | 17 | 94807  | 0.88 | 0.33 | 0.51 | 0.17 | 145 |
| 7 ZC434.8                    | 181  | 13 | 13 | 56441  | 0.82 | 0.29 | 0.55 | 0.16 | 92  |
| 22 ZC434.8                   | 342  | 17 | 13 | 93798  | 0.93 | 0.39 | 0.54 | 0.17 | 114 |
| 1 ZC434.8                    | 174  | 11 | 10 | 20322  | 0.86 | 0.34 | 0.52 | 0.18 | 75  |
| 10 ZC8.4d;ZC8.4a;ZC8.4b      | 26   | 18 | 1  | 87880  | 0.37 | 0.00 | 0.05 | 0.26 | 5   |
| 22 ZK1010.1;F25B5.4a         | 51   | 19 | 5  | 22710  | 0.72 | 0.12 | 0.48 | 0.23 | 31  |
| 10 ZK1010.1;F25B5.4a         | 155  | 16 | 4  | 22426  | 0.66 | 0.11 | 0.49 | 0.17 | 27  |
| 7 ZK1010.1;F25B5.4c;F25B5.4a | 40   | 6  | 1  | 11554  | 2.09 | 0.03 | 0.29 | 0.25 | 5   |
| 1 ZK1058.1                   | 45   | 5  | 2  | 11146  | 1.18 | 0.34 | 0.51 | 0.16 | 21  |
| 7 ZK1058.1                   | 63   | 12 | 2  | 37697  | 1.77 | 0.08 | 0.43 | 0.16 | 17  |
| 22 ZK1058.1                  | 171  | 13 | 1  | 53392  | 1.13 | 0.39 | 0.55 | 0.11 | 13  |
| 10 ZK1073.1                  | 97   | 6  | 3  | 21482  | 1.26 | 0.33 | 0.51 | 0.11 | 21  |
| 22 ZK1073.1                  | 66   | 6  | 2  | 15943  | 1.61 | 0.12 | 0.49 | 0.18 | 14  |
| 7 ZK1073.1                   | 14   | 2  | 1  | 4719   | 0.93 | 0.41 | 0.51 | 0.09 | 6   |
| 1 ZK1073.1                   | 58   | 9  | 1  | 14394  | 1.19 | 0.33 | 0.51 | 0.23 | 4   |
| 22 ZK1127.10                 | 612  | 29 | 23 | 166116 | 0.84 | 0.25 | 0.55 | 0.17 | 202 |
| 10 ZK1127.10                 | 385  | 21 | 16 | 39094  | 0.93 | 0.38 | 0.52 | 0.15 | 142 |

|                               |     |    |    |        |       |      |      |      |     |
|-------------------------------|-----|----|----|--------|-------|------|------|------|-----|
| 7 ZK1127.10                   | 373 | 16 | 15 | 33365  | 0.90  | 0.38 | 0.52 | 0.22 | 136 |
| 1 ZK1127.10                   | 457 | 22 | 13 | 24337  | 1.00  | 0.49 | 0.50 | 0.16 | 119 |
| 22 ZK1307.1a                  | 366 | 24 | 22 | 113247 | 0.67  | 0.08 | 0.38 | 0.18 | 154 |
| 10 ZK1307.1a                  | 269 | 17 | 12 | 77849  | 1.14  | 0.42 | 0.51 | 0.15 | 94  |
| 1 ZK1307.1a                   | 104 | 10 | 6  | 28520  | 1.18  | 0.35 | 0.51 | 0.16 | 43  |
| 7 ZK1307.1a                   | 91  | 8  | 4  | 19312  | 1.01  | 0.50 | 0.50 | 0.18 | 27  |
| 22 ZK1307.8                   | 332 | 19 | 9  | 145396 | 1.07  | 0.44 | 0.52 | 0.15 | 98  |
| 1 ZK1307.8                    | 151 | 7  | 3  | 21636  | 0.93  | 0.41 | 0.52 | 0.19 | 28  |
| 1 ZK180.4                     | 261 | 17 | 6  | 38166  | 1.27  | 0.27 | 0.49 | 0.19 | 51  |
| 22 ZK180.4                    | 243 | 12 | 5  | 41322  | 2.26  | 0.02 | 0.23 | 0.20 | 34  |
| 10 ZK180.4                    | 253 | 9  | 5  | 22421  | 1.30  | 0.31 | 0.51 | 0.18 | 30  |
| 7 ZK180.4                     | 42  | 6  | 1  | 11384  | 1.86  | 0.06 | 0.39 | 0.09 | 8   |
| 10 ZK185.3                    | 30  | 2  | 1  | 1603   | 2.36  | 0.03 | 0.27 | 0.13 | 4   |
| 22 ZK353.6                    | 232 | 20 | 10 | 111305 | 0.75  | 0.15 | 0.49 | 0.24 | 80  |
| 7 ZK353.6                     | 261 | 15 | 9  | 74143  | 0.66  | 0.13 | 0.48 | 0.26 | 67  |
| 1 ZK353.6                     | 97  | 12 | 7  | 26524  | 0.92  | 0.39 | 0.52 | 0.24 | 59  |
| 10 ZK353.6                    | 196 | 11 | 7  | 65545  | 0.84  | 0.28 | 0.51 | 0.26 | 55  |
| 10 ZK455.1                    | 738 | 56 | 48 | 215951 | 0.82  | 0.26 | 0.51 | 0.17 | 314 |
| 22 ZK455.1                    | 855 | 54 | 43 | 182040 | 0.74  | 0.14 | 0.49 | 0.18 | 281 |
| 1 ZK455.1                     | 813 | 42 | 22 | 99138  | 0.97  | 0.45 | 0.51 | 0.19 | 137 |
| 7 ZK455.1                     | 489 | 28 | 18 | 127332 | 0.69  | 0.16 | 0.50 | 0.17 | 128 |
| 22 ZK470.5a;ZK470.5b          | 24  | 7  | 2  | 7885   | 1.53  | 0.15 | 0.49 | 0.17 | 12  |
| 10 ZK470.5a;ZK470.5b          | 36  | 3  | 2  | 4029   | 0.83  | 0.28 | 0.51 | 0.11 | 12  |
| 7 ZK593.1a;ZK593.1b;ZK593.1c  | 87  | 18 | 3  | 38804  | 1.52  | 0.15 | 0.50 | 0.31 | 19  |
| 10 ZK593.1a;ZK593.1b;ZK593.1c | 154 | 20 | 3  | 115521 | 1.55  | 0.18 | 0.49 | 0.18 | 21  |
| 1 ZK593.1a;ZK593.1b;ZK593.1c  | 54  | 9  | 2  | 23357  | 1.97  | 0.03 | 0.30 | 0.17 | 15  |
| 22 ZK593.1a;ZK593.1b;ZK593.1c | 114 | 19 | 1  | 53107  | 1.54  | 0.14 | 0.49 | 0.17 | 8   |
| 10 ZK593.4                    | 71  | 17 | 3  | 94182  | 13.99 | 0.00 | 0.00 | 0.37 | 14  |
| 22 ZK593.4                    | 71  | 15 | 3  | 103276 | 1.34  | 0.24 | 0.54 | 0.41 | 14  |
| 1 ZK593.4                     | 119 | 13 | 1  | 19506  | 1.38  | 0.20 | 0.50 | 0.13 | 5   |
| 7 ZK593.4                     | 166 | 18 | 1  | 26458  | 2.51  | 0.01 | 0.15 | 0.16 | 4   |
| 22 ZK6.7a;ZK6.7b              | 36  | 3  | 1  | 4374   | 1.06  | 0.45 | 0.52 | 0.22 | 8   |
| 7 ZK617.1b;ZK617.1a           | 234 | 25 | 13 | 51967  | 0.66  | 0.13 | 0.48 | 0.18 | 103 |
| 22 ZK617.1b;ZK617.1a;ZK617.1c | 648 | 52 | 32 | 115318 | 0.93  | 0.39 | 0.54 | 0.15 | 213 |

|                               |       |     |     |         |      |      |      |      |      |
|-------------------------------|-------|-----|-----|---------|------|------|------|------|------|
| 1 ZK617.1b;ZK617.1a;ZK617.1c  | 84    | 17  | 7   | 38350   | 1.53 | 0.13 | 0.49 | 0.14 | 47   |
| 10 ZK617.1b;ZK617.1c;ZK617.1a | 659   | 45  | 32  | 111475  | 1.02 | 0.49 | 0.51 | 0.15 | 257  |
| 22 ZK622.3b;ZK622.3a;ZK622.3c | 198   | 11  | 5   | 38788   | 0.92 | 0.38 | 0.55 | 0.13 | 55   |
| 1 ZK622.3b;ZK622.3a;ZK622.3c  | 78    | 6   | 2   | 15537   | 1.44 | 0.17 | 0.49 | 0.20 | 11   |
| 10 ZK622.3d;ZK622.3a;ZK622.3c | 400   | 11  | 7   | 29447   | 1.26 | 0.33 | 0.51 | 0.14 | 72   |
| 7 ZK622.3d;ZK622.3a;ZK622.3c  | 167   | 12  | 4   | 38709   | 1.10 | 0.42 | 0.51 | 0.17 | 22   |
| 7 ZK632.4                     | 55    | 4   | 2   | 6950    | 1.35 | 0.24 | 0.56 | 0.28 | 13   |
| 10 ZK652.9                    | 22    | 2   | 2   | 11480   | 2.00 | 0.07 | 0.43 | 0.07 | 16   |
| 1 ZK652.9                     | 39    | 2   | 2   | 12496   | 2.05 | 0.03 | 0.28 | 0.08 | 19   |
| 22 ZK673.2                    | 115   | 7   | 4   | 12080   | 1.22 | 0.32 | 0.54 | 0.17 | 34   |
| 1 ZK673.2                     | 21    | 4   | 2   | 3572    | 1.05 | 0.47 | 0.50 | 0.24 | 12   |
| 10 ZK673.2                    | 133   | 5   | 1   | 9139    | 1.08 | 0.46 | 0.50 | 0.05 | 4    |
| 22 ZK688.3                    | 318   | 8   | 6   | 103786  | 0.81 | 0.22 | 0.54 | 0.15 | 73   |
| 1 ZK688.3                     | 183   | 5   | 4   | 16383   | 0.76 | 0.22 | 0.50 | 0.14 | 50   |
| 7 ZK688.3                     | 201   | 5   | 3   | 15384   | 1.26 | 0.29 | 0.55 | 0.12 | 38   |
| 10 ZK688.3                    | 134   | 3   | 2   | 12540   | 1.27 | 0.32 | 0.51 | 0.08 | 35   |
| 10 ZK688.6b;ZK688.6a          | 122   | 10  | 5   | 9162    | 0.87 | 0.31 | 0.51 | 0.14 | 44   |
| 22 ZK688.6b;ZK688.6a          | 130   | 5   | 4   | 8329    | 0.81 | 0.22 | 0.54 | 0.13 | 27   |
| 10 ZK783.2                    | 18    | 4   | 1   | 11667   | 0.87 | 0.31 | 0.51 | 0.17 | 10   |
| 10 ZK829.1                    | 63    | 13  | 1   | 825091  | 3.63 | 0.00 | 0.05 | 0.66 | 4    |
| 7 ZK829.4                     | 10478 | 372 | 280 | 1846680 | 0.87 | 0.34 | 0.53 | 0.17 | 2313 |
| 22 ZK829.4                    | 10016 | 308 | 253 | 1880630 | 0.85 | 0.28 | 0.54 | 0.17 | 2184 |
| 10 ZK829.4                    | 10218 | 307 | 239 | 1740440 | 1.01 | 0.48 | 0.51 | 0.16 | 2122 |
| 1 ZK829.4                     | 8249  | 300 | 181 | 704991  | 0.97 | 0.45 | 0.50 | 0.17 | 1424 |
| 7 ZK909.3                     | 34    | 7   | 3   | 18433   | 0.73 | 0.20 | 0.52 | 0.24 | 14   |
| 22 ZK945.2                    | 303   | 16  | 10  | 56480   | 0.66 | 0.07 | 0.34 | 0.23 | 63   |
| 1 ZK945.2                     | 228   | 13  | 9   | 45516   | 1.07 | 0.44 | 0.51 | 0.17 | 72   |
| 7 ZK945.2                     | 229   | 11  | 9   | 24891   | 0.89 | 0.37 | 0.52 | 0.21 | 65   |
| 10 ZK945.2                    | 145   | 13  | 7   | 90349   | 0.65 | 0.10 | 0.48 | 0.12 | 63   |
| 22 ZK973.6                    | 3480  | 136 | 124 | 331300  | 1.39 | 0.21 | 0.53 | 0.17 | 1044 |
| 10 ZK973.6                    | 2385  | 105 | 85  | 251273  | 0.62 | 0.09 | 0.47 | 0.16 | 742  |
| 7 ZK973.6                     | 1350  | 90  | 61  | 178469  | 1.02 | 0.49 | 0.51 | 0.20 | 474  |
| 1 ZK973.6                     | 1261  | 76  | 52  | 112382  | 0.82 | 0.29 | 0.50 | 0.19 | 389  |

Supplementary Table S3 Peptides identified in proteomic analysis

| Replicate | Protein Groups                      | Peptide                 | Peptide Annotation Normalized |           |       |             | CV [%] |
|-----------|-------------------------------------|-------------------------|-------------------------------|-----------|-------|-------------|--------|
|           |                                     |                         | Score                         | Intensity | Ratio | Variability |        |
| 22        | B0035.3                             | TVTNFLTLEYLEK           | 43                            | 651       | 0.64  | 0.21        | 32     |
| 10        | B0035.3                             | ISEIPTLF EK             | 15                            | 1579      | 0.73  | 0.09        | 13     |
| 1         | B0035.3                             | YFGDYAASK               | 11                            | 821       | 0.75  | 0.20        | 27     |
| 10        | B0035.3                             | YFGDYAASK               | 13                            | 2492      | 0.80  | 0.13        | 16     |
| 10        | B0035.3                             | ISEIPTLF EK             | 11                            | 1473      | 0.87  | 0.13        | 14     |
| 22        | B0035.3                             | YFGDYAASK               | 16                            | 2359      | 0.89  | 0.08        | 9      |
| 10        | B0035.3                             | YFGDYAASK               | 15                            | 4207      | 0.92  | 0.22        | 25     |
| 1         | B0035.3                             | ISEIPTLF EK             | 11                            | 699       | 1.05  | 0.23        | 22     |
| 10        | B0035.5                             | EDQIYRIDHYLGK           | 11                            | 3134      | 0.42  | 0.14        | 33     |
| 22        | B0035.5                             | EDQIYRIDHYLGK           | 12                            | 4111      | 0.58  | 0.11        | 19     |
| 10        | B0035.5                             | EDQIYRIDHYLGK           | 20                            | 4980      | 0.67  | 0.17        | 26     |
| 10        | B0035.5                             | EDQIYRIDHYLGK           | 12                            | 4894      | 0.78  | 0.15        | 19     |
| 10        | B0035.5                             | RHSVSDPISK              | 12                            | 1324      | 1.76  | 0.14        | 8      |
| 22        | B0041.4                             | LNPYASILRK              | 25                            | 51173     | 0.77  | 0.20        | 26     |
| 22        | B0041.4                             | LNPYASILRK              | 21                            | 2949      | 1.26  | 0.12        | 9      |
| 22        | B0041.4                             | EAVVFLRRSHLWADIEK       | 21                            | 4538      | 1.97  | 0.13        | 7      |
| 22        | B0205.3                             | FSTFVDTLNGK             | 36                            | 895       | 0.38  | 0.32        | 84     |
| 22        | B0205.3                             | IAHLALK                 | 33                            | 18154     | 0.42  | 0.08        | 19     |
| 22        | B0205.3                             | IAHLALK                 | 21                            | 1525      | 0.45  | 0.16        | 34     |
| 22        | B0205.3                             | IAHLALK                 | 11                            | 1537      | 0.55  | 0.25        | 47     |
| 22        | B0205.3                             | FSTFVDTLNGK             | 30                            | 874       | 0.90  | 0.13        | 15     |
| 10        | B0205.3                             | IAHLALK                 | 11                            | 2399      | 1.48  | 0.09        | 6      |
| 22        | B0205.3                             | IAHLALK                 | 37                            | 4601      | 1.66  | 0.14        | 9      |
| 22        | B0205.3                             | IAHLALK                 | 22                            | 2175      | 1.80  | 0.13        | 7      |
| 10        | B0205.3                             | IAHLALK                 | 25                            | 966       | 7.07  | 0.26        | 4      |
| 10        | B0222.9                             | GDRIELL LPK             | 22                            | 2115      | 0.82  | 0.17        | 21     |
| 10        | B0222.9                             | GDRIELL LPK             | 12                            | 2120      | 1.37  | 0.19        | 14     |
| 22        | B0222.9                             | GDRIELL LPK             | 27                            | 1476      | 3.23  | 0.33        | 10     |
| 22        | B0222.9                             | GDRIELL LPK             | 24                            | 1423      | 3.40  | 0.06        | 2      |
| 1         | B0228.4c;B0228.4e;B0228.4a;B0228.4d | SLILEEIK                | 12                            | 1613      | 0.53  | 0.75        | 141    |
| 10        | B0228.7                             | VFAANVEK                | 17                            | 721       | 0.77  | 0.12        | 16     |
| 22        | B0250.1                             | GAGGIFK                 | 32                            | 1629      | 1.18  | 0.21        | 18     |
| 22        | B0250.1                             | GAGGIFK                 | 24                            | 663       | 1.32  | 0.40        | 30     |
| 22        | B0250.1                             | TTVVAAEGMHTGQFIHCGAK    | 16                            | 2521      | 1.56  | 0.08        | 5      |
| 22        | B0250.1                             | GAGGIFK                 | 29                            | 2163      | 1.82  | 0.33        | 18     |
| 10        | B0250.5                             | AVYQGEAGIFK             | 12                            | 1270      | 0.51  | 0.29        | 56     |
| 10        | B0250.5                             | EIITVLPSSPHVK           | 31                            | 3146      | 0.55  | 0.17        | 31     |
| 1         | B0250.5                             | AVYQGEAGIFK             | 44                            | 1514      | 0.65  | 0.09        | 13     |
| 10        | B0250.5                             | RAEAVLSLMGK             | 14                            | 1470      | 0.66  | 0.15        | 24     |
| 10        | B0250.5                             | EIITVLPSSPHVK           | 23                            | 3287      | 0.67  | 0.17        | 25     |
| 22        | B0250.5                             | EIITVLPSSPHVK           | 31                            | 4708      | 0.73  | 0.15        | 21     |
| 1         | B0250.5                             | AVYQGEAGIFK             | 16                            | 2971      | 0.74  | 0.15        | 21     |
| 22        | B0250.5                             | EIITVLPSSPHVK           | 31                            | 3312      | 0.80  | 0.17        | 21     |
| 10        | B0250.5                             | RAEAVLSLMGK             | 17                            | 1441      | 0.83  | 0.12        | 15     |
| 1         | B0250.5                             | NIVNLGAVGNGTAAK         | 66                            | 1847      | 0.85  | 0.14        | 16     |
| 22        | B0250.5                             | AVYQGEAGIFK             | 10                            | 2059      | 0.86  | 0.19        | 22     |
| 7         | B0250.5                             | EIITVLPSSPHVK           | 12                            | 2312      | 0.90  | 0.13        | 15     |
| 1         | B0250.5                             | AVYQGEAGIFK             | 13                            | 1560      | 0.91  | 0.16        | 17     |
| 7         | B0250.5                             | EIITVLPSSPHVK           | 16                            | 3218      | 0.91  | 0.14        | 16     |
| 1         | B0250.5                             | EIITVLPSSPHVK           | 12                            | 2316      | 0.91  | 0.18        | 20     |
| 1         | B0250.5                             | NIVNLGAVGNGTAAK         | 33                            | 1671      | 0.91  | 0.16        | 17     |
| 1         | B0250.5                             | EIITVLPSSPHVK           | 11                            | 1594      | 0.96  | 0.08        | 9      |
| 22        | B0250.5                             | LIVYDVNK                | 18                            | 3524      | 0.97  | 0.15        | 16     |
| 10        | B0250.5                             | LIVYDVNK                | 17                            | 2904      | 0.98  | 0.15        | 15     |
| 1         | B0250.5                             | LIVYDVNK                | 14                            | 1164      | 0.99  | 0.11        | 12     |
| 10        | B0250.5                             | RAEAVLSLMGK             | 77                            | 4002      | 0.99  | 0.14        | 14     |
| 10        | B0250.5                             | RAEAVLSLMGK             | 61                            | 4695      | 1.05  | 0.12        | 12     |
| 7         | B0250.5                             | DFGVVYQFLK              | 29                            | 1404      | 1.06  | 0.17        | 16     |
| 1         | B0250.5                             | RAEAVLSLMGK             | 42                            | 1236      | 1.07  | 0.09        | 9      |
| 1         | B0250.5                             | AVYQGEAGIFK             | 26                            | 2551      | 1.08  | 0.07        | 6      |
| 22        | B0250.5                             | RAEAVLSLMGK             | 62                            | 2166      | 1.12  | 0.17        | 15     |
| 10        | B0250.5                             | DFGVVYQFLK              | 52                            | 1563      | 1.13  | 0.10        | 9      |
| 10        | B0250.5                             | AVYQGEAGIFK             | 14                            | 6361      | 1.14  | 0.11        | 9      |
| 10        | B0250.5                             | DFGVVYQFLK              | 33                            | 1432      | 1.15  | 0.14        | 12     |
| 1         | B0250.5                             | DFGVVYQFLK              | 43                            | 1047      | 1.21  | 0.07        | 5      |
| 1         | B0250.5                             | DFGVVYQFLK              | 38                            | 1181      | 1.21  | 0.15        | 12     |
| 1         | B0250.5                             | RAEAVLSLMGK             | 44                            | 1713      | 1.22  | 0.12        | 10     |
| 7         | B0250.5                             | DFGVVYQFLK              | 27                            | 1580      | 1.23  | 0.08        | 7      |
| 22        | B0250.5                             | EIITVLPSSPHVK           | 26                            | 3705      | 1.24  | 0.19        | 16     |
| 10        | B0250.5                             | EIITVLPSSPHVK           | 13                            | 7423      | 1.24  | 0.10        | 8      |
| 22        | B0250.5                             | EIITVLPSSPHVK           | 14                            | 2597      | 1.25  | 0.18        | 14     |
| 1         | B0250.5                             | EIITVLPSSPHVK           | 15                            | 3929      | 1.26  | 0.21        | 16     |
| 7         | B0250.5                             | EIITVLPSSPHVK           | 22                            | 4223      | 1.26  | 0.11        | 8      |
| 10        | B0250.5                             | EIITVLPSSPHVK           | 11                            | 9247      | 1.31  | 0.14        | 10     |
| 22        | B0250.5                             | LIVYDVNK                | 20                            | 2705      | 1.48  | 0.24        | 16     |
| 22        | B0250.5                             | RAEAVLSLMGK             | 16                            | 1013      | 1.56  | 0.20        | 13     |
| 22        | B0250.5                             | NIVNLGAVGNGTAAK         | 12                            | 848       | 1.60  | 0.21        | 13     |
| 22        | B0250.5                             | EIITVLPSSPHVK           | 16                            | 4525      | 1.92  | 0.16        | 8      |
| 22        | B0250.5                             | EIITVLPSSPHVK           | 22                            | 6782      | 2.39  | 0.12        | 5      |
| 22        | B0250.5                             | NIVNLGAVGNGTAAK         | 18                            | 1021      | 2.58  | 0.12        | 5      |
| 22        | B0261.1                             | NDKPAAPK                | 17                            | 139       | 2.09  | 0.11        | 5      |
| 10        | B0272.1                             | GHYTEGAELVDNVLDVVRK     | 22                            | 2660      | 0.61  | 0.11        | 18     |
| 10        | B0272.1                             | GHYTEGAELVDNVLDVVRK     | 17                            | 2109      | 0.78  | 0.25        | 32     |
| 10        | B0272.1                             | GHYTEGAELVDNVLDVVRK     | 27                            | 3343      | 0.86  | 0.30        | 34     |
| 22        | B0272.1                             | GHYTEGAELVDNVLDVVRK     | 23                            | 2431      | 1.00  | 0.16        | 16     |
| 10        | B0272.3                             | LNVTVVDSNQSALEK         | 47                            | 2496      | 0.64  | 0.33        | 51     |
| 10        | B0272.3                             | LLEVVRHTETSDATFNQLVDYGK | 35                            | 2627      | 0.70  | 0.22        | 32     |
| 10        | B0272.3                             | LNVTVVDSNQSALEK         | 39                            | 3093      | 0.71  | 0.14        | 20     |
| 10        | B0272.3                             | LNVTVVDSNQSALEK         | 27                            | 2304      | 0.71  | 0.10        | 14     |
| 10        | B0272.3                             | LLEVVRHTETSDATFNQLVDYGK | 46                            | 3434      | 0.86  | 0.15        | 17     |
| 1         | B0272.3                             | LLEVVRHTETSDATFNQLVDYGK | 36                            | 944       | 0.86  | 0.28        | 32     |
| 10        | B0272.3                             | HADDAAAQTALVSSVLDR IK   | 11                            | 9984      | 0.94  | 0.14        | 15     |
| 22        | B0272.3                             | LNVTVVDSNQSALEK         | 19                            | 1240      | 0.97  | 0.23        | 24     |
| 1         | B0272.3                             | LLEVVRHTETSDATFNQLVDYGK | 28                            | 807       | 1.15  | 0.24        | 21     |
| 7         | B0272.3                             | LNVTVVDSNQSALEK         | 18                            | 964       | 1.23  | 0.23        | 19     |
| 22        | B0272.3                             | HADDAAAQTALVSSVLDR IK   | 33                            | 5342      | 1.32  | 0.16        | 12     |
| 22        | B0272.3                             | MSTNVSDSVK              | 22                            | 3349      | 1.36  | 0.11        | 8      |
| 10        | B0272.3                             | HADDAAAQTALVSSVLDR IK   | 29                            | 16416     | 1.37  | 0.15        | 11     |

|                      |                         |    |      |      |      |     |
|----------------------|-------------------------|----|------|------|------|-----|
| 22 B0272.3           | HADDAAAQTALVSSVLDRIK    | 30 | 8983 | 1.44 | 0.20 | 14  |
| 1 B0272.3            | LLEVVRHTETSDATFNQLVDYGK | 14 | 826  | 1.44 | 0.15 | 10  |
| 22 B0272.3           | LNVTVVDNQSAALEK         | 11 | 1171 | 1.47 | 0.22 | 15  |
| 1 B0272.3            | HADDAAAQTALVSSVLDRIK    | 16 | 3225 | 1.53 | 0.11 | 7   |
| 1 B0272.3            | LNVTVVDNQSAALEK         | 15 | 1167 | 1.53 | 0.16 | 11  |
| 7 B0272.3            | HADDAAAQTALVSSVLDRIK    | 21 | 5119 | 1.70 | 0.13 | 7   |
| 22 B0272.3           | HADDAAAQTALVSSVLDRIK    | 17 | 7173 | 1.93 | 0.19 | 10  |
| 7 B0280.3            | YLVEYLK                 | 31 | 1503 | 0.59 | 0.17 | 30  |
| 1 B0280.3            | VTSTGPEAELAPIEQAK       | 18 | 3215 | 0.63 | 0.10 | 16  |
| 1 B0280.3            | VTSTGPEAELAPIEQAK       | 13 | 2063 | 0.75 | 0.11 | 14  |
| 22 B0280.3           | YLVEYLK                 | 37 | 2056 | 0.78 | 0.09 | 11  |
| 7 B0280.3            | YLVEYLK                 | 22 | 1321 | 0.99 | 0.14 | 14  |
| 7 B0280.3            | YLVEYLK                 | 41 | 2681 | 1.02 | 0.08 | 8   |
| 7 B0280.3            | YLVEYLK                 | 28 | 1859 | 1.04 | 0.10 | 10  |
| 10 B0280.3           | YLVEYLK                 | 33 | 3029 | 1.08 | 0.06 | 5   |
| 7 B0280.3            | NFYVIADYLK              | 96 | 2826 | 1.09 | 0.13 | 12  |
| 7 B0280.3            | YLVEYLK                 | 25 | 1382 | 1.14 | 0.13 | 12  |
| 7 B0280.3            | NFYVIADYLK              | 66 | 2094 | 1.22 | 0.06 | 5   |
| 10 B0280.3           | NFYVIADYLK              | 67 | 2591 | 1.24 | 0.11 | 9   |
| 22 B0280.3           | NFYVIADYLK              | 72 | 2278 | 1.29 | 0.09 | 7   |
| 7 B0280.3            | NFYVIADYLK              | 71 | 2721 | 1.29 | 0.11 | 8   |
| 10 B0280.3           | NFYVIADYLK              | 47 | 2149 | 1.56 | 0.13 | 9   |
| 10 B0286.3           | DSLTAFAVNAVRK           | 19 | 5000 | 0.53 | 0.06 | 12  |
| 10 B0286.3           | DSLTAFAVNAVRK           | 20 | 4258 | 0.57 | 0.14 | 25  |
| 10 B0286.3           | SISETEFVARK             | 31 | 2857 | 0.64 | 0.24 | 38  |
| 10 B0286.3           | EVTEEGLALVLK            | 39 | 1746 | 0.67 | 0.17 | 26  |
| 22 B0286.3           | DSLTAFAVNAVRK           | 23 | 2891 | 0.71 | 0.06 | 8   |
| 10 B0286.3           | EVTEEGLALVLK            | 33 | 1294 | 0.76 | 0.10 | 14  |
| 10 B0286.3           | EVTEEGLALVLK            | 54 | 1233 | 0.76 | 0.15 | 19  |
| 7 B0286.3            | EVTEEGLALVLK            | 51 | 1368 | 0.76 | 0.09 | 12  |
| 10 B0286.3           | DSLTAFAVNAVRK           | 11 | 2047 | 0.82 | 0.24 | 30  |
| 1 B0286.3            | LVFRALEK                | 16 | 959  | 0.88 | 0.07 | 8   |
| 22 B0286.3           | LVFRALEK                | 25 | 1497 | 0.89 | 0.38 | 43  |
| 22 B0286.3           | SISETEFVARK             | 11 | 1123 | 1.02 | 0.27 | 26  |
| 22 B0286.3           | LVFRALEK                | 12 | 1614 | 1.18 | 0.26 | 22  |
| 22 B0286.3           | EVTEEGLALVLK            | 53 | 1144 | 1.58 | 0.04 | 3   |
| 22 B0334.3a;B0334.3b | KPLVIVGK                | 13 | 3634 | 0.64 | 0.22 | 35  |
| 22 B0334.3a;B0334.3b | AFGGAGTVVRTVPEIK        | 37 | 3323 | 0.84 | 0.17 | 20  |
| 22 B0334.3a;B0334.3b | LPWLATPGGK              | 18 | 2011 | 1.10 | 0.16 | 14  |
| 10 B0334.3b;B0334.3a | KPLVIVGK                | 17 | 7731 | 0.30 | 0.50 | 166 |
| 22 B0365.1           | VIAIIAEGVPENQTRK        | 36 | 1242 | 0.40 | 0.07 | 18  |
| 22 B0365.1           | VIAIIAEGVPENQTRK        | 37 | 1251 | 0.40 | 0.14 | 35  |
| 22 B0365.1           | EILIPAYK                | 27 | 1312 | 0.45 | 0.12 | 27  |
| 1 B0365.1            | VIAIIAEGVPENQTRK        | 57 | 1150 | 0.49 | 0.15 | 30  |
| 22 B0365.1           | LTILNRK                 | 26 | 2768 | 0.50 | 0.44 | 88  |
| 1 B0365.1            | VIAIIAEGVPENQTRK        | 54 | 1856 | 0.57 | 0.19 | 33  |
| 1 B0365.1            | LTILNRK                 | 16 | 3554 | 0.66 | 0.17 | 26  |
| 22 B0365.1           | VIAIIAEGVPENQTRK        | 43 | 1453 | 0.67 | 0.16 | 24  |
| 22 B0365.1           | IHILDAAK                | 17 | 4477 | 0.70 | 0.21 | 31  |
| 10 B0365.1           | IHILDAAK                | 12 | 2726 | 0.75 | 0.22 | 29  |
| 1 B0365.1            | VIAIIAEGVPENQTRK        | 41 | 743  | 0.82 | 0.22 | 27  |
| 22 B0365.1           | ELEAWFGK                | 36 | 498  | 0.86 | 0.18 | 21  |
| 22 B0365.1           | LTILNRK                 | 27 | 2901 | 0.88 | 0.26 | 29  |
| 22 B0365.1           | VIAIIAEGVPENQTRK        | 31 | 1276 | 0.91 | 0.19 | 20  |
| 1 B0365.1            | LTILNRK                 | 17 | 4230 | 0.95 | 0.15 | 16  |
| 22 B0365.1           | EILIPAYK                | 14 | 1121 | 0.95 | 0.24 | 25  |
| 7 B0365.1            | IHILDAAK                | 10 | 2457 | 1.02 | 0.17 | 17  |
| 1 B0365.1            | LTILNRK                 | 25 | 3005 | 1.04 | 0.26 | 25  |
| 22 B0365.1           | VIAIIAEGVPENQTRK        | 64 | 3818 | 1.08 | 0.10 | 9   |
| 22 B0365.1           | EILIPAYK                | 16 | 1698 | 1.08 | 0.08 | 8   |
| 1 B0365.1            | IHILDAAK                | 13 | 1759 | 1.10 | 0.07 | 6   |
| 1 B0365.1            | EILIPAYK                | 19 | 1204 | 1.13 | 0.10 | 9   |
| 1 B0365.1            | VIAIIAEGVPENQTRK        | 55 | 2782 | 1.15 | 0.11 | 9   |
| 1 B0365.1            | EILIPAYK                | 20 | 2842 | 1.17 | 0.10 | 8   |
| 1 B0365.1            | IHILDAAK                | 20 | 2235 | 1.19 | 0.16 | 14  |
| 22 B0365.1           | LTILNRK                 | 46 | 3252 | 1.25 | 0.18 | 14  |
| 22 B0365.1           | IHILDAAK                | 52 | 5497 | 1.28 | 0.14 | 11  |
| 22 B0365.1           | EILIPAYK                | 18 | 1571 | 1.29 | 0.07 | 5   |
| 22 B0365.1           | IHILDAAK                | 42 | 4698 | 1.31 | 0.10 | 7   |
| 22 B0365.1           | LTILNRK                 | 17 | 3923 | 1.32 | 0.10 | 7   |
| 22 B0365.1           | EILIPAYK                | 16 | 3067 | 1.37 | 0.16 | 11  |
| 1 B0365.1            | VIAIIAEGVPENQTRK        | 45 | 942  | 1.38 | 0.16 | 11  |
| 22 B0365.1           | EILIPAYK                | 22 | 1523 | 1.41 | 0.18 | 13  |
| 22 B0365.1           | VIAIIAEGVPENQTRK        | 47 | 2570 | 1.50 | 0.13 | 9   |
| 1 B0365.1            | VIAIIAEGVPENQTRK        | 59 | 2453 | 1.53 | 0.19 | 12  |
| 22 B0365.1           | LTILNRK                 | 26 | 2916 | 1.57 | 0.65 | 41  |
| 7 B0365.1            | IHILDAAK                | 13 | 3579 | 1.57 | 0.10 | 6   |
| 22 B0365.1           | VIAIIAEGVPENQTRK        | 37 | 2631 | 1.64 | 0.18 | 11  |
| 10 B0365.1           | IHILDAAK                | 19 | 1807 | 1.69 | 0.32 | 19  |
| 1 B0365.1            | IHILDAAK                | 38 | 2953 | 1.70 | 0.12 | 7   |
| 10 B0365.1           | IHILDAAK                | 36 | 5068 | 1.93 | 0.12 | 6   |
| 1 B0365.1            | IHILDAAK                | 30 | 2070 | 2.46 | 0.17 | 7   |
| 22 B0365.1           | LTILNRK                 | 24 | 1093 | 2.48 | 0.21 | 8   |
| 10 B0365.1           | IHILDAAK                | 39 | 4453 | 2.98 | 0.06 | 2   |
| 10 B0365.1           | IHILDAAK                | 24 | 2146 | 3.95 | 0.38 | 10  |
| 10 B0365.1           | IHILDAAK                | 16 | 2132 | 4.11 | 0.15 | 4   |
| 10 B0365.1           | IHILDAAK                | 30 | 2069 | 4.43 | 0.23 | 5   |
| 22 B0365.6           | LGIVSGTWPAHAK           | 54 | 3081 | 1.00 | 0.11 | 11  |
| 7 B0365.7            | LSTLHFK                 | 11 | 1358 | 0.77 | 0.11 | 15  |
| 22 B0393.1           | VDDWAAETATWTAETK        | 48 | 723  | 0.30 | 0.11 | 35  |
| 10 B0393.1           | VDDWAAETATWTAETK        | 24 | 775  | 0.41 | 0.25 | 62  |
| 10 B0393.1           | ISRQTGFVLEGK            | 30 | 5105 | 0.41 | 0.27 | 65  |
| 22 B0393.1           | VDDWAAETATWTAETK        | 51 | 1751 | 0.42 | 0.14 | 33  |
| 1 B0393.1            | ISRQTGFVLEGK            | 49 | 5131 | 0.44 | 0.10 | 23  |
| 22 B0393.1           | LLATQAHLGSTNLFQMQQYVYK  | 68 | 3743 | 0.47 | 0.15 | 31  |
| 22 B0393.1           | LLATQAHLGSTNLFQMQQYVYK  | 72 | 2948 | 0.49 | 0.19 | 40  |
| 1 B0393.1            | ISRQTGFVLEGK            | 12 | 1800 | 0.49 | 0.08 | 15  |
| 22 B0393.1           | LLATQAHLGSTNLFQMQQYVYK  | 79 | 4362 | 0.50 | 0.15 | 31  |
| 1 B0393.1            | ISRQTGFVLEGK            | 16 | 2476 | 0.50 | 0.16 | 33  |
| 10 B0393.1           | ISRQTGFVLEGK            | 35 | 3861 | 0.54 | 0.21 | 38  |
| 22 B0393.1           | LLATQAHLGSTNLFQMQQYVYK  | 78 | 4516 | 0.56 | 0.19 | 33  |

|                      |                               |    |        |      |      |     |
|----------------------|-------------------------------|----|--------|------|------|-----|
| 22 B0393.1           | LLATQAHLGSTNLFQMQQYVYK        | 54 | 2299   | 0.59 | 0.22 | 37  |
| 10 B0393.1           | VDDWAAETATWTAETK              | 23 | 835    | 0.64 | 0.26 | 40  |
| 1 B0393.1            | ISRQTGFVLE GK                 | 28 | 3037   | 0.64 | 0.07 | 12  |
| 22 B0393.1           | VDDWAAETATWTAETK              | 65 | 2029   | 0.68 | 0.20 | 29  |
| 22 B0393.1           | LLATQAHLGSTNLFQMQQYVYK        | 39 | 1516   | 0.69 | 0.27 | 39  |
| 10 B0393.1           | VDDWAAETATWTAETK              | 63 | 1193   | 0.70 | 0.21 | 30  |
| 22 B0393.1           | EIMPDLYFYRDPTE TEK            | 19 | 4075   | 0.73 | 0.34 | 47  |
| 7 B0393.1            | ISRQTGFVLE GK                 | 22 | 1944   | 0.73 | 0.26 | 35  |
| 22 B0393.1           | ISRQTGFVLE GK                 | 18 | 2107   | 0.82 | 0.30 | 36  |
| 7 B0393.1            | VDDWAAETATWTAETK              | 36 | 1253   | 0.83 | 0.22 | 26  |
| 22 B0393.1           | EETGAHADVAEAQEYQQPTDIDFTTQGGK | 71 | 7355   | 0.84 | 0.12 | 14  |
| 22 B0393.1           | ISRQTGFVLE GK                 | 27 | 4082   | 0.85 | 0.14 | 17  |
| 7 B0393.1            | ISRQTGFVLE GK                 | 13 | 2093   | 0.85 | 0.32 | 37  |
| 10 B0393.1           | RRFDGPNII NVK                 | 10 | 5489   | 0.86 | 0.28 | 33  |
| 1 B0393.1            | ISRQTGFVLE GK                 | 46 | 2693   | 0.86 | 0.15 | 17  |
| 22 B0393.1           | ISRQTGFVLE GK                 | 45 | 5890   | 0.86 | 0.12 | 13  |
| 22 B0393.1           | EETGAHADVAEAQEYQQPTDIDFTTQGGK | 84 | 8564   | 0.91 | 0.17 | 19  |
| 10 B0393.1           | RRFDGPNII NVK                 | 21 | 11016  | 0.92 | 0.37 | 40  |
| 1 B0393.1            | ISRQTGFVLE GK                 | 55 | 1540   | 0.93 | 0.08 | 8   |
| 22 B0393.1           | ISRQTGFVLE GK                 | 34 | 5312   | 0.96 | 0.07 | 7   |
| 10 B0393.1           | ISRQTGFVLE GK                 | 37 | 5453   | 0.98 | 0.17 | 18  |
| 22 B0393.1           | ISRQTGFVLE GK                 | 49 | 5770   | 1.01 | 0.10 | 10  |
| 1 B0393.1            | ISRQTGFVLE GK                 | 32 | 1508   | 1.01 | 0.14 | 14  |
| 7 B0393.1            | ISRQTGFVLE GK                 | 46 | 4202   | 1.03 | 0.10 | 10  |
| 22 B0393.1           | EETGAHADVAEAQEYQQPTDIDFTTQGGK | 52 | 6686   | 1.04 | 0.12 | 12  |
| 22 B0393.1           | ISRQTGFVLE GK                 | 36 | 3934   | 1.05 | 0.17 | 16  |
| 10 B0393.1           | ISRQTGFVLE GK                 | 37 | 4846   | 1.07 | 0.15 | 14  |
| 7 B0393.1            | VDDWAAETATWTAETK              | 41 | 1476   | 1.10 | 0.15 | 14  |
| 22 B0393.1           | EETGAHADVAEAQEYQQPTDIDFTTQGGK | 52 | 7541   | 1.11 | 0.10 | 9   |
| 22 B0393.1           | ISRQTGFVLE GK                 | 50 | 3767   | 1.11 | 0.12 | 10  |
| 22 B0393.1           | ISRQTGFVLE GK                 | 37 | 3126   | 1.12 | 0.09 | 8   |
| 10 B0393.1           | RRFDGPNII NVK                 | 16 | 99780  | 1.13 | 0.07 | 6   |
| 7 B0393.1            | ISRQTGFVLE GK                 | 29 | 4078   | 1.15 | 0.08 | 7   |
| 22 B0393.1           | ISRQTGFVLE GK                 | 53 | 5028   | 1.16 | 0.15 | 13  |
| 22 B0393.1           | ISRQTGFVLE GK                 | 51 | 3605   | 1.17 | 0.11 | 9   |
| 22 B0393.1           | RRFDGPNII NVK                 | 16 | 14147  | 1.27 | 0.06 | 5   |
| 22 B0393.1           | ISRQTGFVLE GK                 | 27 | 3171   | 1.31 | 0.12 | 9   |
| 7 B0393.1            | ISRQTGFVLE GK                 | 26 | 2625   | 1.35 | 0.13 | 10  |
| 10 B0393.1           | ISRQTGFVLE GK                 | 28 | 4910   | 1.36 | 0.10 | 7   |
| 7 B0393.1            | RRFDGPNII NVK                 | 30 | 10947  | 1.36 | 0.33 | 24  |
| 7 B0393.1            | RRFDGPNII NVK                 | 22 | 11953  | 1.38 | 0.13 | 10  |
| 22 B0393.1           | ISRQTGFVLE GK                 | 48 | 4158   | 1.40 | 0.10 | 7   |
| 7 B0393.1            | ISRQTGFVLE GK                 | 29 | 3207   | 1.45 | 0.14 | 10  |
| 22 B0393.1           | RRFDGPNII NVK                 | 29 | 14701  | 1.47 | 0.07 | 5   |
| 22 B0393.1           | ISRQTGFVLE GK                 | 31 | 2866   | 1.52 | 0.19 | 12  |
| 10 B0393.1           | RRFDGPNII NVK                 | 21 | 51866  | 1.58 | 0.08 | 5   |
| 22 B0393.1           | RRFDGPNII NVK                 | 26 | 11816  | 1.59 | 0.09 | 6   |
| 22 B0393.1           | RRFDGPNII NVK                 | 18 | 5909   | 1.67 | 0.26 | 15  |
| 10 B0393.1           | RRFDGPNII NVK                 | 23 | 61891  | 1.69 | 0.11 | 6   |
| 10 B0393.1           | ISRQTGFVLE GK                 | 57 | 4753   | 1.71 | 0.10 | 6   |
| 10 B0393.1           | ISRQTGFVLE GK                 | 41 | 4600   | 1.71 | 0.14 | 8   |
| 22 B0393.1           | ISRQTGFVLE GK                 | 63 | 5982   | 1.75 | 0.08 | 5   |
| 22 B0393.1           | RRFDGPNII NVK                 | 20 | 84978  | 1.85 | 0.12 | 6   |
| 22 B0393.1           | RRFDGPNII NVK                 | 19 | 114108 | 1.90 | 0.12 | 6   |
| 7 B0393.1            | RRFDGPNII NVK                 | 23 | 37565  | 2.59 | 0.19 | 7   |
| 7 B0393.1            | RRFDGPNII NVK                 | 27 | 38617  | 2.63 | 0.14 | 5   |
| 7 B0393.1            | RRFDGPNII NVK                 | 21 | 9776   | 2.97 | 0.11 | 4   |
| 10 B0395.3           | HFLDFAQALQSK                  | 41 | 2351   | 2.66 | 0.11 | 4   |
| 10 B0403.4           | FAIRGFPTIK                    | 26 | 1325   | 0.30 | 0.16 | 54  |
| 10 B0403.4           | VRLGALDATVHTVVANK             | 13 | 4138   | 0.43 | 0.19 | 43  |
| 22 B0403.4           | VRLGALDATVHTVVANK             | 11 | 2256   | 0.84 | 0.09 | 10  |
| 22 B0403.4           | VRLGALDATVHTVVANK             | 21 | 4601   | 0.89 | 0.20 | 22  |
| 22 B0403.4           | FAIRGFPTIK                    | 11 | 706    | 0.92 | 0.08 | 9   |
| 22 B0403.4           | VRLGALDATVHTVVANK             | 15 | 2003   | 0.94 | 0.08 | 8   |
| 7 B0403.4            | FAIRGFPTIK                    | 21 | 1652   | 0.95 | 0.11 | 12  |
| 7 B0403.4            | FAIRGFPTIK                    | 13 | 1230   | 1.01 | 0.09 | 9   |
| 10 B0403.4           | FAIRGFPTIK                    | 13 | 564    | 1.01 | 0.13 | 12  |
| 22 B0403.4           | FAIRGFPTIK                    | 15 | 1572   | 1.02 | 0.16 | 15  |
| 22 B0403.4           | FAIRGFPTIK                    | 18 | 839    | 1.04 | 0.09 | 8   |
| 22 B0403.4           | FAIRGFPTIK                    | 20 | 1421   | 1.04 | 0.17 | 17  |
| 7 B0403.4            | FAIRGFPTIK                    | 13 | 1433   | 1.07 | 0.14 | 13  |
| 10 B0403.4           | FAIRGFPTIK                    | 22 | 1981   | 1.20 | 0.06 | 5   |
| 22 B0403.4           | FAIRGFPTIK                    | 11 | 396    | 1.28 | 0.11 | 9   |
| 22 B0403.4           | VRLGALDATVHTVVANK             | 13 | 3652   | 1.30 | 0.17 | 13  |
| 1 B0403.4            | FAIRGFPTIK                    | 22 | 750    | 1.33 | 0.19 | 14  |
| 10 B0403.4           | VRLGALDATVHTVVANK             | 18 | 3541   | 1.76 | 0.12 | 7   |
| 10 B0403.4           | VRLGALDATVHTVVANK             | 20 | 4666   | 2.06 | 0.15 | 7   |
| 10 B0432.2           | AELVTSHPSVK                   | 32 | 6816   | 0.28 | 0.22 | 78  |
| 10 B0432.2           | AELVTSHPSVK                   | 58 | 9287   | 0.41 | 0.29 | 71  |
| 10 B0432.2           | AELVTSHPSVK                   | 45 | 9488   | 0.65 | 0.17 | 26  |
| 1 B0432.2            | IVELLE GK                     | 16 | 449    | 0.93 | 0.16 | 17  |
| 10 B0432.2           | IVELLE GK                     | 29 | 710    | 1.27 | 0.17 | 14  |
| 10 B0432.2           | AELVTSHPSVK                   | 64 | 8717   | 1.34 | 0.20 | 15  |
| 1 B0432.2            | IVELLE GK                     | 15 | 424    | 1.52 | 0.14 | 9   |
| 10 B0432.2           | IVELLE GK                     | 30 | 675    | 1.68 | 0.14 | 8   |
| 22 B0432.2           | IVELLE GK                     | 10 | 601    | 2.44 | 0.12 | 5   |
| 1 B0464.1            | YSTDFYVLDK                    | 41 | 491    | 0.37 | 0.20 | 53  |
| 10 B0464.1           | YSTDFYVLDK                    | 21 | 814    | 0.75 | 0.20 | 27  |
| 1 B0464.1            | YSTDFYVLDK                    | 22 | 339    | 1.00 | 0.17 | 17  |
| 10 C01B10.11         | LPEASVAFVK                    | 10 | 2278   | 0.79 | 0.12 | 15  |
| 22 C01B10.11         | LPEASVAFVK                    | 15 | 1258   | 1.30 | 0.22 | 17  |
| 10 C01F1.3a          | LQSLAPVLSAK                   | 14 | 1488   | 0.75 | 0.21 | 28  |
| 10 C01F1.3a          | LQSLAPVLSAK                   | 16 | 4122   | 1.05 | 0.22 | 21  |
| 1 C01F1.3a;C01F1.3b  | LQSLAPVLSAK                   | 14 | 905    | 0.97 | 0.27 | 28  |
| 22 C01F1.3a;C01F1.3b | LQSLAPVLSAK                   | 21 | 1767   | 1.24 | 0.19 | 16  |
| 22 C01F1.3a;C01F1.3b | VRGEYTIQSGSK                  | 22 | 2304   | 1.37 | 0.18 | 13  |
| 1 C01G5.4            | LDVEGLNAEYAK                  | 11 | 2477   | 0.65 | 0.73 | 113 |
| 7 C01G5.5            | LALGTYEAK                     | 26 | 578    | 1.33 | 0.16 | 12  |
| 10 C01G6.6a          | VLPFLTASTESK                  | 14 | 968    | 1.32 | 0.19 | 14  |
| 22 C01G6.6a;C01G6.6b | VLPFLTASTESK                  | 18 | 902    | 1.00 | 0.13 | 13  |
| 22 C01G6.6a;C01G6.6b | VLPFLTASTESK                  | 26 | 1052   | 1.08 | 0.23 | 21  |

|                      |                          |    |       |       |      |     |
|----------------------|--------------------------|----|-------|-------|------|-----|
| 22 C01G6.6a;C01G6.6b | VLPFLTASTESK             | 38 | 1458  | 1.24  | 0.22 | 18  |
| 10 C01G8.5a;C01G8.5b | QLFDQVVK                 | 16 | 1019  | 0.17  | 0.27 | 158 |
| 1 C01G8.5a;C01G8.5b  | QLFDQVVK                 | 17 | 525   | 1.64  | 0.19 | 12  |
| 22 C02B10.1          | IGSFQLLQ GK              | 18 | 2258  | 0.55  | 0.13 | 24  |
| 10 C02B10.1          | IGSFQLLQ GK              | 35 | 2517  | 0.61  | 0.07 | 12  |
| 10 C02B10.1          | IGSFQLLQ GK              | 41 | 5002  | 0.66  | 0.14 | 22  |
| 10 C02B10.1          | IGSFQLLQ GK              | 43 | 4523  | 0.72  | 0.10 | 14  |
| 10 C02B10.1          | IGSFQLLQ GK              | 48 | 2792  | 0.73  | 0.08 | 11  |
| 10 C02B10.1          | NTPGFSQSPK               | 40 | 5783  | 0.75  | 0.20 | 26  |
| 10 C02B10.1          | IGSFQLLQ GK              | 30 | 2860  | 0.78  | 0.17 | 22  |
| 10 C02B10.1          | IGSFQLLQ GK              | 35 | 2832  | 1.08  | 0.13 | 12  |
| 10 C02B10.1          | NTPGFSQSPK               | 30 | 5998  | 1.16  | 0.16 | 14  |
| 22 C02B10.1          | IGSFQLLQ GK              | 34 | 4152  | 1.34  | 0.15 | 11  |
| 7 C02D5.4            | GQVPTLEHDEGK             | 64 | 4673  | 0.61  | 0.14 | 23  |
| 7 C02D5.4            | ALESIP EVAASQPTENG VGFFK | 48 | 4420  | 0.64  | 0.13 | 20  |
| 7 C02D5.4            | GQVPTLEHDEGK             | 25 | 2637  | 0.65  | 0.18 | 27  |
| 7 C02D5.4            | ALESIP EVAASQPTENG VGFFK | 33 | 2923  | 0.80  | 0.23 | 29  |
| 7 C02D5.4            | GQVPTLEHDEGK             | 50 | 2998  | 0.81  | 0.21 | 25  |
| 1 C02D5.4            | ALESIP EVAASQPTENG VGFFK | 18 | 2089  | 0.93  | 0.19 | 21  |
| 1 C02D5.4            | ALESIP EVAASQPTENG VGFFK | 21 | 314   | 1.00  | 0.05 | 5   |
| 1 C02D5.4            | ALESIP EVAASQPTENG VGFFK | 39 | 796   | 1.08  | 0.16 | 15  |
| 1 C02D5.4            | ALESIP EVAASQPTENG VGFFK | 61 | 1076  | 1.12  | 0.21 | 18  |
| 7 C02D5.4            | TVLAGVNSK                | 10 | 1359  | 2.07  | 0.31 | 15  |
| 10 C02F5.9           | IHLVIAEAGKPVVVK          | 45 | 4290  | 0.33  | 0.32 | 99  |
| 7 C02F5.9            | IHLVIAEAGKPVVVK          | 59 | 3562  | 0.37  | 0.26 | 71  |
| 1 C02F5.9            | IHLVIAEAGKPVVVK          | 13 | 1372  | 0.45  | 0.14 | 30  |
| 22 C02F5.9           | IHLVIAEAGKPVVVK          | 77 | 7347  | 0.48  | 0.21 | 43  |
| 7 C02F5.9            | IHLVIAEAGKPVVVK          | 56 | 4662  | 0.48  | 0.34 | 70  |
| 10 C02F5.9           | IHLVIAEAGKPVVVK          | 66 | 6980  | 0.52  | 0.41 | 79  |
| 10 C02F5.9           | IHLVIAEAGKPVVVK          | 54 | 3903  | 0.57  | 0.11 | 19  |
| 22 C02F5.9           | IHLVIAEAGKPVVVK          | 59 | 5149  | 0.64  | 0.05 | 7   |
| 1 C02F5.9            | IHLVIAEAGKPVVVK          | 26 | 14068 | 0.65  | 0.19 | 29  |
| 10 C02F5.9           | IHLVIAEAGKPVVVK          | 69 | 8174  | 1.07  | 0.25 | 24  |
| 1 C02F5.9            | IHLVIAEAGKPVVVK          | 18 | 12084 | 1.22  | 0.15 | 12  |
| 7 C02F5.9            | IHLVIAEAGKPVVVK          | 21 | 20070 | 1.34  | 0.35 | 26  |
| 22 C02F5.9           | IHLVIAEAGKPVVVK          | 18 | 47389 | 1.60  | 0.45 | 28  |
| 10 C02F5.9           | IHLVIAEAGKPVVVK          | 33 | 58119 | 1.71  | 0.14 | 8   |
| 22 C02F5.9           | IHLVIAEAGKPVVVK          | 26 | 36949 | 1.76  | 0.06 | 3   |
| 7 C02F5.9            | IHLVIAEAGKPVVVK          | 10 | 9934  | 2.16  | 0.04 | 2   |
| 7 C02F5.9            | IHLVIAEAGKPVVVK          | 14 | 6303  | 3.09  | 0.37 | 12  |
| 10 C02F5.9           | IHLVIAEAGKPVVVK          | 22 | 6687  | 6.62  | 0.39 | 6   |
| 7 C02F5.9            | IHLVIAEAGKPVVVK          | 31 | 12359 | 11.21 | 0.19 | 2   |
| 7 C03G5.1            | DQAH LNVADK              | 43 | 2932  | 0.32  | 0.24 | 73  |
| 1 C03G5.1            | RS DIAQYK                | 16 | 3655  | 1.21  | 0.09 | 8   |
| 1 C03G5.1            | RS DIAQYK                | 20 | 3592  | 1.43  | 0.08 | 6   |
| 7 C03G5.1            | GQVLNYTPK                | 32 | 1408  | 1.49  | 0.15 | 10  |
| 10 C04F6.1           | NSEELLVK                 | 33 | 2347  | 0.10  | 0.33 | 322 |
| 22 C04F6.1           | DSLFFNVHEK               | 31 | 4205  | 0.11  | 0.30 | 278 |
| 10 C04F6.1           | NSEELLVK                 | 26 | 4088  | 0.13  | 0.32 | 249 |
| 10 C04F6.1           | VTFVEESK                 | 16 | 2440  | 0.15  | 0.35 | 235 |
| 10 C04F6.1           | TDLSEIK                  | 43 | 2395  | 0.16  | 0.19 | 122 |
| 22 C04F6.1           | AARLNQVNVVSEYK           | 23 | 4388  | 0.16  | 0.13 | 80  |
| 10 C04F6.1           | TDLSEIK                  | 36 | 2492  | 0.16  | 0.19 | 118 |
| 10 C04F6.1           | EEIVYSMENEK              | 57 | 2113  | 0.20  | 0.28 | 142 |
| 10 C04F6.1           | NSEELLVK                 | 33 | 2516  | 0.20  | 0.29 | 147 |
| 22 C04F6.1           | EGQFVKPQTVYTYTFK         | 41 | 2321  | 0.20  | 0.35 | 175 |
| 10 C04F6.1           | VTFVEESK                 | 36 | 4680  | 0.20  | 0.35 | 172 |
| 10 C04F6.1           | TDLSEIK                  | 23 | 1985  | 0.21  | 0.27 | 131 |
| 10 C04F6.1           | EEIVYSMENEK              | 60 | 2487  | 0.21  | 0.15 | 74  |
| 22 C04F6.1           | SLLTFLTND SK             | 24 | 865   | 0.21  | 0.09 | 44  |
| 22 C04F6.1           | MIREIQSEQGFK             | 30 | 1111  | 0.21  | 0.16 | 74  |
| 22 C04F6.1           | EEIVYSMENEK              | 28 | 1275  | 0.22  | 0.21 | 97  |
| 10 C04F6.1           | EEIVYSMENEK              | 30 | 1676  | 0.22  | 0.16 | 73  |
| 10 C04F6.1           | VTFVEESK                 | 34 | 5178  | 0.22  | 0.21 | 97  |
| 22 C04F6.1           | VTFVEESK                 | 36 | 3488  | 0.23  | 0.23 | 103 |
| 22 C04F6.1           | VTFVEESK                 | 31 | 2008  | 0.23  | 0.38 | 167 |
| 22 C04F6.1           | AARLNQVNVVSEYK           | 21 | 3699  | 0.24  | 0.21 | 90  |
| 10 C04F6.1           | VTFVEESK                 | 26 | 5292  | 0.24  | 0.36 | 150 |
| 10 C04F6.1           | NSEELLVK                 | 35 | 2634  | 0.24  | 0.45 | 188 |
| 10 C04F6.1           | AARLNQVNVVSEYK           | 49 | 2740  | 0.24  | 0.20 | 82  |
| 22 C04F6.1           | VLLPVYK                  | 23 | 5569  | 0.24  | 0.29 | 119 |
| 22 C04F6.1           | MIREIQSEQGFK             | 39 | 862   | 0.24  | 0.13 | 53  |
| 10 C04F6.1           | DSLFFNVHEK               | 31 | 5225  | 0.25  | 0.07 | 27  |
| 10 C04F6.1           | VTFVEESK                 | 34 | 4489  | 0.25  | 0.19 | 75  |
| 10 C04F6.1           | TDLSEIK                  | 37 | 2113  | 0.25  | 0.20 | 81  |
| 22 C04F6.1           | IESLEQRELSDEFK           | 28 | 1305  | 0.25  | 0.38 | 151 |
| 10 C04F6.1           | NSEELLVK                 | 34 | 1829  | 0.25  | 0.16 | 63  |
| 22 C04F6.1           | EEIVYSMENEK              | 32 | 2607  | 0.25  | 0.16 | 64  |
| 22 C04F6.1           | VTFVEESK                 | 34 | 3163  | 0.26  | 0.33 | 129 |
| 10 C04F6.1           | TDLSEIK                  | 43 | 1996  | 0.27  | 0.22 | 82  |
| 10 C04F6.1           | NSEELLVK                 | 25 | 1074  | 0.27  | 0.14 | 51  |
| 10 C04F6.1           | NTLEITHK                 | 52 | 15687 | 0.27  | 0.17 | 61  |
| 10 C04F6.1           | NSEELLVK                 | 34 | 1968  | 0.28  | 0.12 | 45  |
| 22 C04F6.1           | EEIVYSMENEK              | 55 | 2758  | 0.28  | 0.23 | 83  |
| 1 C04F6.1            | DSLFFNVHEK               | 26 | 1692  | 0.28  | 0.22 | 78  |
| 1 C04F6.1            | LIEQFYQQGDK              | 66 | 1586  | 0.28  | 0.19 | 67  |
| 10 C04F6.1           | DSLFFNVHEK               | 25 | 4022  | 0.29  | 0.14 | 47  |
| 10 C04F6.1           | VTFVEESK                 | 28 | 3467  | 0.29  | 0.22 | 78  |
| 22 C04F6.1           | VTFVEESK                 | 32 | 2267  | 0.29  | 0.29 | 101 |
| 1 C04F6.1            | DSLFFNVHEK               | 31 | 1718  | 0.29  | 0.07 | 24  |
| 22 C04F6.1           | EEIVYSMENEK              | 57 | 2209  | 0.30  | 0.19 | 64  |
| 22 C04F6.1           | IESLEQRELSDEFK           | 36 | 2223  | 0.30  | 0.18 | 60  |
| 22 C04F6.1           | LIEQFYQQGDK              | 38 | 1376  | 0.30  | 0.10 | 32  |
| 10 C04F6.1           | NSEELLVK                 | 33 | 1967  | 0.30  | 0.32 | 107 |
| 22 C04F6.1           | SITPLRAAELLK             | 17 | 7720  | 0.31  | 0.15 | 49  |
| 1 C04F6.1            | IESLEQRELSDEFK           | 18 | 733   | 0.31  | 0.26 | 83  |
| 10 C04F6.1           | VTFVEESK                 | 29 | 3447  | 0.31  | 0.26 | 83  |
| 10 C04F6.1           | NSEELLVK                 | 35 | 2318  | 0.31  | 0.11 | 34  |
| 10 C04F6.1           | NSEELLVK                 | 34 | 1657  | 0.32  | 0.11 | 35  |
| 22 C04F6.1           | DSLFFNVHEK               | 30 | 3109  | 0.32  | 0.37 | 117 |
| 10 C04F6.1           | NTLEITHK                 | 47 | 19604 | 0.32  | 0.17 | 52  |

|            |                  |    |       |      |      |     |
|------------|------------------|----|-------|------|------|-----|
| 22 C04F6.1 | MIREIQSEQGFK     | 18 | 1094  | 0.32 | 0.18 | 57  |
| 22 C04F6.1 | VLLPVYK          | 18 | 2234  | 0.33 | 0.16 | 48  |
| 10 C04F6.1 | VLLPVYK          | 19 | 6249  | 0.34 | 0.06 | 17  |
| 10 C04F6.1 | EEIVYSMENEK      | 27 | 954   | 0.34 | 0.25 | 73  |
| 10 C04F6.1 | IESLEQRELSDEFK   | 30 | 1573  | 0.34 | 0.17 | 52  |
| 10 C04F6.1 | AARLNQVNVVSEYK   | 61 | 3826  | 0.34 | 0.16 | 46  |
| 22 C04F6.1 | MIREIQSEQGFK     | 34 | 1874  | 0.34 | 0.11 | 34  |
| 1 C04F6.1  | DSLFFNVHEK       | 35 | 1287  | 0.34 | 0.12 | 35  |
| 10 C04F6.1 | EEIVYSMENEK      | 37 | 1450  | 0.34 | 0.19 | 55  |
| 22 C04F6.1 | TQDLPLIRPASRQTK  | 15 | 4821  | 0.35 | 0.39 | 110 |
| 22 C04F6.1 | VLLPVYK          | 22 | 3456  | 0.35 | 0.40 | 112 |
| 10 C04F6.1 | AARLNQVNVVSEYK   | 52 | 3375  | 0.36 | 0.30 | 83  |
| 10 C04F6.1 | VTFVEESK         | 22 | 2662  | 0.36 | 0.32 | 89  |
| 22 C04F6.1 | VVRREEEIVVK      | 11 | 1025  | 0.36 | 0.22 | 60  |
| 10 C04F6.1 | IESLEQRELSDEFK   | 21 | 1925  | 0.36 | 0.19 | 52  |
| 22 C04F6.1 | SVNFDK           | 11 | 1480  | 0.37 | 0.21 | 57  |
| 7 C04F6.1  | TQDLPLIRPASRQTK  | 18 | 4182  | 0.37 | 0.18 | 48  |
| 10 C04F6.1 | IESLEQRELSDEFK   | 33 | 2573  | 0.38 | 0.08 | 21  |
| 22 C04F6.1 | LIEQFYQQGDK      | 51 | 1994  | 0.38 | 0.18 | 47  |
| 10 C04F6.1 | DSLFFNVHEK       | 13 | 2658  | 0.38 | 0.13 | 35  |
| 22 C04F6.1 | MIREIQSEQGFK     | 40 | 2534  | 0.38 | 0.10 | 27  |
| 10 C04F6.1 | IESLEQRELSDEFK   | 18 | 992   | 0.38 | 0.06 | 15  |
| 10 C04F6.1 | VLLPVYK          | 21 | 6755  | 0.39 | 0.18 | 46  |
| 22 C04F6.1 | IESLEQRELSDEFK   | 41 | 2246  | 0.39 | 0.18 | 47  |
| 10 C04F6.1 | VSIELEK          | 15 | 1276  | 0.39 | 0.20 | 51  |
| 10 C04F6.1 | NTLEITHK         | 37 | 8268  | 0.39 | 0.08 | 20  |
| 22 C04F6.1 | DCSEQPRFAVLAK    | 18 | 2343  | 0.39 | 0.19 | 49  |
| 1 C04F6.1  | MIREIQSEQGFK     | 35 | 922   | 0.39 | 0.35 | 88  |
| 22 C04F6.1 | TDLSEIK          | 46 | 2760  | 0.39 | 0.13 | 34  |
| 22 C04F6.1 | LIEQFYQQGDK      | 65 | 3056  | 0.40 | 0.17 | 43  |
| 22 C04F6.1 | LIEQFYQQGDK      | 48 | 1207  | 0.40 | 0.12 | 29  |
| 22 C04F6.1 | AARLNQVNVVSEYK   | 42 | 2636  | 0.41 | 0.09 | 23  |
| 22 C04F6.1 | AYNFWTVSEK       | 43 | 3052  | 0.41 | 0.12 | 30  |
| 10 C04F6.1 | LIEQFYQQGDK      | 54 | 2165  | 0.41 | 0.13 | 33  |
| 10 C04F6.1 | EEIVYSMENEK      | 58 | 1993  | 0.41 | 0.16 | 39  |
| 22 C04F6.1 | DSLFFNVHEK       | 20 | 2023  | 0.41 | 0.19 | 45  |
| 10 C04F6.1 | LIEQFYQQGDK      | 62 | 2557  | 0.41 | 0.07 | 17  |
| 10 C04F6.1 | AEVNPFK          | 13 | 2073  | 0.41 | 0.25 | 60  |
| 22 C04F6.1 | AEVNPFK          | 10 | 818   | 0.41 | 0.17 | 42  |
| 10 C04F6.1 | EEIVYSMENEK      | 42 | 2249  | 0.41 | 0.15 | 36  |
| 1 C04F6.1  | AEVNPFK          | 26 | 903   | 0.41 | 0.24 | 57  |
| 22 C04F6.1 | GIPEYELLIK       | 15 | 3650  | 0.42 | 0.21 | 50  |
| 22 C04F6.1 | EEIVYSMENEK      | 40 | 2087  | 0.42 | 0.10 | 23  |
| 22 C04F6.1 | AARLNQVNVVSEYK   | 52 | 9364  | 0.42 | 0.08 | 19  |
| 22 C04F6.1 | AARLNQVNVVSEYK   | 18 | 6310  | 0.42 | 0.20 | 49  |
| 1 C04F6.1  | NTLEITHK         | 29 | 2470  | 0.42 | 0.16 | 38  |
| 10 C04F6.1 | SLTLFLTNDISK     | 27 | 900   | 0.42 | 0.18 | 42  |
| 10 C04F6.1 | SITPLRAAELLK     | 15 | 1571  | 0.42 | 0.28 | 68  |
| 1 C04F6.1  | LIEQFYQQGDK      | 68 | 1363  | 0.42 | 0.09 | 22  |
| 22 C04F6.1 | VLLPVYK          | 31 | 6373  | 0.42 | 0.04 | 9   |
| 10 C04F6.1 | EGQFVKPQTVYTYTFK | 64 | 3503  | 0.42 | 0.04 | 10  |
| 10 C04F6.1 | AEVNPFK          | 13 | 2496  | 0.42 | 0.12 | 29  |
| 22 C04F6.1 | EEIVYSMENEK      | 30 | 2358  | 0.42 | 0.13 | 31  |
| 22 C04F6.1 | NSEELLVK         | 34 | 2635  | 0.43 | 0.16 | 37  |
| 7 C04F6.1  | IESLEQRELSDEFK   | 34 | 3986  | 0.43 | 0.13 | 31  |
| 1 C04F6.1  | LIEQFYQQGDK      | 60 | 1339  | 0.44 | 0.10 | 23  |
| 22 C04F6.1 | EEIVYSMENEK      | 37 | 1524  | 0.44 | 0.16 | 36  |
| 22 C04F6.1 | EGQFVKPQTVYTYTFK | 50 | 3231  | 0.44 | 0.12 | 28  |
| 10 C04F6.1 | VTFVEESK         | 33 | 4641  | 0.44 | 0.14 | 31  |
| 10 C04F6.1 | TQDLPLIRPASRQTK  | 10 | 7245  | 0.45 | 0.29 | 63  |
| 22 C04F6.1 | NLITLK           | 42 | 1685  | 0.46 | 0.14 | 30  |
| 22 C04F6.1 | AARLNQVNVVSEYK   | 55 | 3187  | 0.46 | 0.30 | 65  |
| 22 C04F6.1 | NSEELLVK         | 10 | 1283  | 0.46 | 0.22 | 49  |
| 10 C04F6.1 | NSEELLVK         | 48 | 2016  | 0.46 | 0.14 | 30  |
| 1 C04F6.1  | NTLEITHK         | 39 | 3691  | 0.46 | 0.21 | 45  |
| 22 C04F6.1 | AARLNQVNVVSEYK   | 57 | 7801  | 0.46 | 0.09 | 19  |
| 7 C04F6.1  | AEVNPFK          | 13 | 1280  | 0.46 | 0.07 | 15  |
| 10 C04F6.1 | VSIELEK          | 34 | 2875  | 0.47 | 0.15 | 31  |
| 22 C04F6.1 | AARLNQVNVVSEYK   | 25 | 2072  | 0.47 | 0.40 | 84  |
| 10 C04F6.1 | IESLEQRELSDEFK   | 37 | 4881  | 0.47 | 0.09 | 20  |
| 22 C04F6.1 | NTIQHLIHHFEK     | 36 | 945   | 0.47 | 0.47 | 99  |
| 22 C04F6.1 | IESLEQRELSDEFK   | 42 | 3831  | 0.48 | 0.35 | 74  |
| 1 C04F6.1  | NTLEITHK         | 21 | 2890  | 0.48 | 0.17 | 36  |
| 22 C04F6.1 | AARLNQVNVVSEYK   | 56 | 3798  | 0.48 | 0.16 | 34  |
| 10 C04F6.1 | DCSEQPRFAVLAK    | 35 | 6328  | 0.48 | 0.16 | 33  |
| 10 C04F6.1 | LIEQFYQQGDK      | 58 | 2131  | 0.49 | 0.12 | 24  |
| 10 C04F6.1 | NTIQHLIHHFEK     | 25 | 4440  | 0.49 | 0.29 | 60  |
| 10 C04F6.1 | AARLNQVNVVSEYK   | 52 | 3739  | 0.49 | 0.16 | 33  |
| 22 C04F6.1 | AARLNQVNVVSEYK   | 17 | 5535  | 0.49 | 0.12 | 25  |
| 10 C04F6.1 | NTLEITHK         | 33 | 3923  | 0.49 | 0.20 | 40  |
| 22 C04F6.1 | SITPLRAAELLK     | 33 | 19948 | 0.49 | 0.49 | 100 |
| 22 C04F6.1 | VSIELEK          | 21 | 1309  | 0.49 | 0.08 | 17  |
| 10 C04F6.1 | VSIELEK          | 27 | 1537  | 0.50 | 0.14 | 29  |
| 1 C04F6.1  | LIEQFYQQGDK      | 16 | 689   | 0.50 | 0.18 | 36  |
| 10 C04F6.1 | IESLEQRELSDEFK   | 26 | 3254  | 0.50 | 0.16 | 33  |
| 10 C04F6.1 | DSLFFNVHEK       | 21 | 4418  | 0.50 | 0.07 | 15  |
| 22 C04F6.1 | AARLNQVNVVSEYK   | 58 | 3458  | 0.50 | 0.16 | 31  |
| 1 C04F6.1  | IESLEQRELSDEFK   | 21 | 1463  | 0.50 | 0.16 | 32  |
| 22 C04F6.1 | NSEELLVK         | 35 | 2593  | 0.50 | 0.12 | 23  |
| 22 C04F6.1 | SITPLRAAELLK     | 33 | 23417 | 0.50 | 0.22 | 44  |
| 22 C04F6.1 | MPTILSINGK       | 44 | 4081  | 0.51 | 0.02 | 5   |
| 22 C04F6.1 | DCSEQPRFAVLAK    | 18 | 2179  | 0.51 | 0.34 | 67  |
| 10 C04F6.1 | NTLEITHK         | 33 | 6819  | 0.51 | 0.22 | 43  |
| 22 C04F6.1 | GIPEYELLIK       | 11 | 2243  | 0.51 | 0.07 | 13  |
| 1 C04F6.1  | LIEQFYQQGDK      | 58 | 2174  | 0.51 | 0.12 | 23  |
| 10 C04F6.1 | MIREIQSEQGFK     | 40 | 2618  | 0.51 | 0.23 | 46  |
| 22 C04F6.1 | NTLEITHK         | 28 | 4525  | 0.51 | 0.14 | 28  |
| 22 C04F6.1 | TDLSEIK          | 46 | 3315  | 0.51 | 0.14 | 27  |
| 22 C04F6.1 | AARLNQVNVVSEYK   | 50 | 2496  | 0.51 | 0.17 | 34  |
| 22 C04F6.1 | MIREIQSEQGFK     | 59 | 4934  | 0.51 | 0.25 | 49  |
| 22 C04F6.1 | SLTLFLTNDISK     | 55 | 1518  | 0.51 | 0.21 | 42  |

|            |                      |    |       |      |      |    |
|------------|----------------------|----|-------|------|------|----|
| 22 C04F6.1 | NTLEITHK             | 45 | 6812  | 0.52 | 0.15 | 29 |
| 1 C04F6.1  | AARLNQVNVVSEYK       | 15 | 403   | 0.52 | 0.15 | 29 |
| 22 C04F6.1 | GIPEYELLK            | 12 | 5632  | 0.52 | 0.21 | 41 |
| 22 C04F6.1 | DCSEQPRFAVLAK        | 16 | 2841  | 0.52 | 0.28 | 54 |
| 7 C04F6.1  | NTIQHLIHHFEK         | 19 | 2880  | 0.52 | 0.16 | 30 |
| 10 C04F6.1 | VVRREEIVVK           | 14 | 4274  | 0.53 | 0.08 | 15 |
| 1 C04F6.1  | LIEQFYQQGDK          | 61 | 1243  | 0.53 | 0.14 | 27 |
| 22 C04F6.1 | SITPLRAAELLK         | 26 | 29724 | 0.53 | 0.29 | 55 |
| 10 C04F6.1 | AARLNQVNVVSEYK       | 44 | 1734  | 0.53 | 0.18 | 34 |
| 22 C04F6.1 | MIREIQSEQGFK         | 46 | 3831  | 0.53 | 0.25 | 47 |
| 1 C04F6.1  | AYNFWTVSEK           | 39 | 905   | 0.53 | 0.38 | 72 |
| 22 C04F6.1 | AARLNQVNVVSEYK       | 63 | 3047  | 0.53 | 0.13 | 25 |
| 10 C04F6.1 | SITPLRAAELLK         | 11 | 7072  | 0.54 | 0.40 | 74 |
| 7 C04F6.1  | AARLNQVNVVSEYK       | 30 | 1552  | 0.54 | 0.36 | 67 |
| 22 C04F6.1 | IESLEQRELSDEFK       | 27 | 1801  | 0.54 | 0.11 | 20 |
| 10 C04F6.1 | NTLEITHK             | 49 | 9068  | 0.54 | 0.14 | 26 |
| 22 C04F6.1 | IESLEQRELSDEFK       | 30 | 1701  | 0.54 | 0.10 | 18 |
| 10 C04F6.1 | AARLNQVNVVSEYK       | 28 | 2877  | 0.54 | 0.15 | 28 |
| 10 C04F6.1 | DCSEQPRFAVLAK        | 32 | 5027  | 0.54 | 0.27 | 49 |
| 22 C04F6.1 | MIREIQSEQGFK         | 14 | 662   | 0.54 | 0.18 | 33 |
| 7 C04F6.1  | AEVNPFK              | 12 | 1798  | 0.54 | 0.10 | 18 |
| 1 C04F6.1  | DSLFFNVHEK           | 16 | 1339  | 0.55 | 0.27 | 50 |
| 22 C04F6.1 | IESLEQRELSDEFK       | 40 | 2747  | 0.55 | 0.21 | 38 |
| 10 C04F6.1 | NTIQHLIHHFEK         | 37 | 3337  | 0.55 | 0.10 | 18 |
| 1 C04F6.1  | LIEQFYQQGDK          | 39 | 498   | 0.55 | 0.19 | 35 |
| 1 C04F6.1  | LIEQFYQQGDK          | 27 | 877   | 0.56 | 0.28 | 51 |
| 10 C04F6.1 | DSLFFNVHEK           | 18 | 3350  | 0.56 | 0.09 | 16 |
| 22 C04F6.1 | IESLEQRELSDEFK       | 37 | 4379  | 0.56 | 0.35 | 64 |
| 10 C04F6.1 | NTIQHLIHHFEK         | 27 | 1998  | 0.56 | 0.21 | 38 |
| 22 C04F6.1 | SITPLRAAELLK         | 21 | 1759  | 0.56 | 0.43 | 78 |
| 22 C04F6.1 | VVRREEIVVK           | 25 | 1397  | 0.56 | 0.09 | 15 |
| 22 C04F6.1 | IESLEQRELSDEFK       | 21 | 2104  | 0.56 | 0.17 | 31 |
| 22 C04F6.1 | SITPLRAAELLK         | 15 | 2748  | 0.56 | 0.47 | 84 |
| 10 C04F6.1 | GIPEYELLK            | 17 | 3227  | 0.56 | 0.10 | 18 |
| 1 C04F6.1  | LIEQFYQQGDK          | 62 | 2419  | 0.56 | 0.13 | 24 |
| 22 C04F6.1 | GIPEYELLK            | 17 | 4224  | 0.57 | 0.14 | 25 |
| 22 C04F6.1 | AARLNQVNVVSEYK       | 13 | 1181  | 0.57 | 0.14 | 24 |
| 22 C04F6.1 | NTIQHLIHHFEK         | 22 | 2373  | 0.57 | 0.19 | 34 |
| 22 C04F6.1 | VLLPVYK              | 19 | 4186  | 0.57 | 0.11 | 19 |
| 22 C04F6.1 | MIREIQSEQGFK         | 11 | 4365  | 0.57 | 0.17 | 30 |
| 10 C04F6.1 | EEIVYSMENEK          | 49 | 2567  | 0.57 | 0.15 | 26 |
| 10 C04F6.1 | SITPLRAAELLK         | 14 | 8480  | 0.57 | 0.30 | 53 |
| 22 C04F6.1 | MPTILSINGK           | 58 | 4594  | 0.57 | 0.26 | 45 |
| 22 C04F6.1 | IESLEQRELSDEFK       | 29 | 2842  | 0.57 | 0.20 | 34 |
| 7 C04F6.1  | IESLEQRELSDEFK       | 30 | 3050  | 0.57 | 0.19 | 34 |
| 22 C04F6.1 | LIEQFYQQGDK          | 56 | 2508  | 0.57 | 0.12 | 22 |
| 22 C04F6.1 | NTIQHLIHHFEK         | 26 | 8292  | 0.57 | 0.23 | 40 |
| 10 C04F6.1 | DCSEQPRFAVLAK        | 32 | 3031  | 0.57 | 0.16 | 28 |
| 22 C04F6.1 | GIPEYELLK            | 33 | 6167  | 0.57 | 0.30 | 53 |
| 22 C04F6.1 | NSEELLVK             | 36 | 2155  | 0.57 | 0.14 | 24 |
| 22 C04F6.1 | NSEELLVK             | 38 | 3082  | 0.58 | 0.21 | 36 |
| 10 C04F6.1 | NAFLPK               | 21 | 1119  | 0.58 | 0.13 | 23 |
| 10 C04F6.1 | VVRREEIVVK           | 26 | 2904  | 0.58 | 0.11 | 19 |
| 10 C04F6.1 | MIREIQSEQGFK         | 50 | 2034  | 0.58 | 0.15 | 26 |
| 1 C04F6.1  | VLLPVYK              | 15 | 1492  | 0.59 | 0.06 | 10 |
| 22 C04F6.1 | GIPEYELLK            | 11 | 1426  | 0.59 | 0.11 | 18 |
| 22 C04F6.1 | GIPEYELLK            | 25 | 8065  | 0.59 | 0.14 | 24 |
| 22 C04F6.1 | SITPLRAAELLK         | 38 | 21492 | 0.59 | 0.26 | 44 |
| 1 C04F6.1  | AEVNPFK              | 13 | 1181  | 0.59 | 0.22 | 37 |
| 10 C04F6.1 | IESLEQRELSDEFK       | 39 | 2777  | 0.60 | 0.08 | 13 |
| 10 C04F6.1 | VTFVEESK             | 34 | 3735  | 0.60 | 0.17 | 29 |
| 22 C04F6.1 | MPTILSINGK           | 72 | 4706  | 0.60 | 0.05 | 9  |
| 22 C04F6.1 | DSLFFNVHEK           | 26 | 1805  | 0.60 | 0.12 | 20 |
| 22 C04F6.1 | AARLNQVNVVSEYK       | 38 | 3990  | 0.60 | 0.17 | 28 |
| 10 C04F6.1 | IESLEQRELSDEFK       | 44 | 2289  | 0.60 | 0.20 | 34 |
| 22 C04F6.1 | NLITLK               | 19 | 1820  | 0.60 | 0.40 | 67 |
| 10 C04F6.1 | NLITLK               | 14 | 947   | 0.60 | 0.21 | 35 |
| 22 C04F6.1 | GIPEYELLK            | 44 | 11688 | 0.60 | 0.04 | 7  |
| 22 C04F6.1 | GIPEYELLK            | 31 | 7018  | 0.60 | 0.18 | 29 |
| 10 C04F6.1 | EEIVYSMENEK          | 55 | 1948  | 0.60 | 0.13 | 22 |
| 22 C04F6.1 | MPTILSINGK           | 73 | 5150  | 0.61 | 0.15 | 24 |
| 22 C04F6.1 | VLLPVYK              | 19 | 4150  | 0.61 | 0.06 | 10 |
| 1 C04F6.1  | NTLEITHK             | 41 | 2820  | 0.61 | 0.10 | 16 |
| 10 C04F6.1 | NTLEITHK             | 48 | 8556  | 0.61 | 0.15 | 25 |
| 22 C04F6.1 | AARLNQVNVVSEYK       | 48 | 2364  | 0.61 | 0.09 | 15 |
| 10 C04F6.1 | NTLEITHK             | 47 | 7339  | 0.61 | 0.14 | 24 |
| 10 C04F6.1 | TMEGDCEVAYTIVQEGEK   | 11 | 1209  | 0.61 | 0.29 | 48 |
| 10 C04F6.1 | IESLEQRELSDEFK       | 22 | 2178  | 0.61 | 0.13 | 21 |
| 22 C04F6.1 | AARLNQVNVVSEYK       | 23 | 4931  | 0.61 | 0.16 | 26 |
| 22 C04F6.1 | AARLNQVNVVSEYK       | 45 | 3416  | 0.62 | 0.14 | 22 |
| 22 C04F6.1 | SITPLRAAELLK         | 47 | 19095 | 0.62 | 0.32 | 52 |
| 1 C04F6.1  | AEVNPFK              | 13 | 1673  | 0.62 | 0.17 | 27 |
| 10 C04F6.1 | DSLFFNVHEK           | 13 | 2260  | 0.62 | 0.09 | 15 |
| 22 C04F6.1 | AARLNQVNVVSEYK       | 18 | 1351  | 0.62 | 0.14 | 22 |
| 22 C04F6.1 | IESLEQRELSDEFK       | 20 | 1869  | 0.62 | 0.28 | 45 |
| 10 C04F6.1 | NLITLK               | 18 | 1960  | 0.63 | 0.06 | 9  |
| 22 C04F6.1 | MIREIQSEQGFK         | 20 | 1237  | 0.63 | 0.07 | 11 |
| 10 C04F6.1 | IESLEQRELSDEFK       | 29 | 3356  | 0.63 | 0.12 | 19 |
| 22 C04F6.1 | VLLPVYK              | 14 | 2562  | 0.63 | 0.16 | 26 |
| 22 C04F6.1 | SLLTFLTNSDK          | 46 | 1320  | 0.63 | 0.26 | 41 |
| 22 C04F6.1 | MIREIQSEQGFK         | 16 | 332   | 0.63 | 0.42 | 66 |
| 22 C04F6.1 | LQSEVHSVYTLNVNGQEVVK | 63 | 2213  | 0.64 | 0.21 | 32 |
| 1 C04F6.1  | LIEQFYQQGDK          | 51 | 1380  | 0.64 | 0.14 | 22 |
| 22 C04F6.1 | AYNFWTVSEK           | 22 | 1527  | 0.64 | 0.18 | 28 |
| 10 C04F6.1 | AEVNPFK              | 10 | 1612  | 0.64 | 0.14 | 21 |
| 10 C04F6.1 | SITPLRAAELLK         | 15 | 2431  | 0.64 | 0.37 | 58 |
| 10 C04F6.1 | VLLPVYK              | 33 | 5926  | 0.64 | 0.12 | 19 |
| 10 C04F6.1 | VVRREEIVVK           | 10 | 7739  | 0.64 | 0.17 | 27 |
| 22 C04F6.1 | EGQFVKPQTVYTYTFK     | 38 | 3453  | 0.64 | 0.15 | 23 |
| 22 C04F6.1 | AARLNQVNVVSEYK       | 21 | 3501  | 0.64 | 0.13 | 20 |
| 22 C04F6.1 | EGQFVKPQTVYTYTFK     | 34 | 3890  | 0.64 | 0.19 | 30 |

|            |                  |    |       |      |      |    |
|------------|------------------|----|-------|------|------|----|
| 22 C04F6.1 | AARLNQVNVVSEYK   | 73 | 7570  | 0.65 | 0.08 | 13 |
| 1 C04F6.1  | VHTTIYTK         | 10 | 1873  | 0.65 | 0.25 | 38 |
| 22 C04F6.1 | SITPLRAAELLK     | 61 | 18057 | 0.65 | 0.25 | 38 |
| 22 C04F6.1 | NLITLK           | 33 | 2377  | 0.65 | 0.11 | 17 |
| 22 C04F6.1 | FVVPENK          | 11 | 2296  | 0.66 | 0.09 | 14 |
| 22 C04F6.1 | VLLPVYK          | 24 | 972   | 0.66 | 0.28 | 43 |
| 1 C04F6.1  | AARLNQVNVVSEYK   | 20 | 508   | 0.66 | 0.24 | 36 |
| 1 C04F6.1  | NTIQHLIHHFEK     | 10 | 3363  | 0.66 | 0.18 | 27 |
| 22 C04F6.1 | GIPEYELLIK       | 64 | 21061 | 0.66 | 0.13 | 19 |
| 22 C04F6.1 | NSEELLVK         | 41 | 2639  | 0.66 | 0.20 | 31 |
| 22 C04F6.1 | NAFLPK           | 15 | 644   | 0.66 | 0.06 | 9  |
| 10 C04F6.1 | AARLNQVNVVSEYK   | 12 | 3128  | 0.66 | 0.13 | 19 |
| 22 C04F6.1 | AARLNQVNVVSEYK   | 28 | 4232  | 0.66 | 0.18 | 27 |
| 10 C04F6.1 | NLITLK           | 11 | 1161  | 0.66 | 0.15 | 22 |
| 22 C04F6.1 | SLLTFLTNDISK     | 50 | 1145  | 0.67 | 0.13 | 19 |
| 22 C04F6.1 | MIREIQSEQGFK     | 24 | 6701  | 0.67 | 0.12 | 18 |
| 22 C04F6.1 | VSIELEK          | 16 | 1550  | 0.67 | 0.16 | 24 |
| 22 C04F6.1 | NSEELLVK         | 11 | 1479  | 0.67 | 0.14 | 21 |
| 22 C04F6.1 | NTIQHLIHHFEK     | 13 | 6524  | 0.67 | 0.21 | 32 |
| 1 C04F6.1  | NTLEITHK         | 19 | 1111  | 0.67 | 0.15 | 23 |
| 10 C04F6.1 | VHTTIYTK         | 28 | 18184 | 0.68 | 0.41 | 60 |
| 22 C04F6.1 | MPTILSINGK       | 38 | 5233  | 0.68 | 0.01 | 2  |
| 22 C04F6.1 | MIREIQSEQGFK     | 72 | 4274  | 0.68 | 0.21 | 31 |
| 1 C04F6.1  | LIEQFYQQGDK      | 53 | 1903  | 0.68 | 0.17 | 25 |
| 10 C04F6.1 | SLLTFLTNDISK     | 46 | 1847  | 0.68 | 0.12 | 17 |
| 22 C04F6.1 | VVRREEEIVVK      | 25 | 3259  | 0.68 | 0.14 | 21 |
| 1 C04F6.1  | LIEQFYQQGDK      | 47 | 1294  | 0.68 | 0.10 | 14 |
| 22 C04F6.1 | DSLFFNVHEK       | 13 | 6053  | 0.68 | 0.09 | 13 |
| 22 C04F6.1 | VHTTIYTK         | 24 | 8953  | 0.68 | 0.07 | 11 |
| 22 C04F6.1 | GIPEYELLIK       | 33 | 9676  | 0.68 | 0.26 | 39 |
| 10 C04F6.1 | SLLTFLTNDISK     | 49 | 1577  | 0.68 | 0.29 | 42 |
| 10 C04F6.1 | DSLFFNVHEK       | 25 | 3331  | 0.68 | 0.07 | 11 |
| 22 C04F6.1 | NTIQHLIHHFEK     | 31 | 4164  | 0.68 | 0.13 | 19 |
| 22 C04F6.1 | SITPLRAAELLK     | 10 | 4099  | 0.68 | 0.22 | 32 |
| 22 C04F6.1 | GIPEYELLIK       | 10 | 1574  | 0.68 | 0.41 | 61 |
| 10 C04F6.1 | GIPEYELLIK       | 10 | 2580  | 0.69 | 0.26 | 39 |
| 22 C04F6.1 | AARLNQVNVVSEYK   | 65 | 10728 | 0.69 | 0.11 | 16 |
| 22 C04F6.1 | MPTILSINGK       | 55 | 5144  | 0.69 | 0.12 | 18 |
| 10 C04F6.1 | VHTTIYTK         | 36 | 19322 | 0.69 | 0.31 | 46 |
| 22 C04F6.1 | AARLNQVNVVSEYK   | 55 | 1470  | 0.69 | 0.11 | 16 |
| 22 C04F6.1 | AARLNQVNVVSEYK   | 69 | 11334 | 0.69 | 0.14 | 21 |
| 22 C04F6.1 | AARLNQVNVVSEYK   | 46 | 3666  | 0.69 | 0.28 | 40 |
| 10 C04F6.1 | NLITLK           | 32 | 2574  | 0.69 | 0.22 | 31 |
| 7 C04F6.1  | NTIQHLIHHFEK     | 21 | 2851  | 0.70 | 0.19 | 27 |
| 10 C04F6.1 | NLITLK           | 20 | 1685  | 0.70 | 0.28 | 40 |
| 10 C04F6.1 | AARLNQVNVVSEYK   | 38 | 3619  | 0.70 | 0.07 | 10 |
| 7 C04F6.1  | LIEQFYQQGDK      | 62 | 1386  | 0.70 | 0.11 | 16 |
| 10 C04F6.1 | AARLNQVNVVSEYK   | 38 | 4609  | 0.70 | 0.13 | 18 |
| 1 C04F6.1  | VVRREEEIVVK      | 13 | 510   | 0.70 | 0.11 | 15 |
| 22 C04F6.1 | MIREIQSEQGFK     | 44 | 2812  | 0.70 | 0.15 | 22 |
| 22 C04F6.1 | FVVPENK          | 11 | 1747  | 0.70 | 0.19 | 27 |
| 22 C04F6.1 | GIPEYELLIK       | 47 | 12044 | 0.70 | 0.12 | 17 |
| 22 C04F6.1 | MPTILSINGK       | 68 | 6513  | 0.71 | 0.11 | 15 |
| 22 C04F6.1 | NTLEITHK         | 67 | 7496  | 0.71 | 0.16 | 23 |
| 10 C04F6.1 | NLITLK           | 28 | 2469  | 0.71 | 0.23 | 33 |
| 22 C04F6.1 | IESLEQRELSDEFK   | 34 | 1421  | 0.71 | 0.13 | 18 |
| 22 C04F6.1 | MIREIQSEQGFK     | 31 | 6301  | 0.71 | 0.21 | 30 |
| 1 C04F6.1  | NTIQHLIHHFEK     | 16 | 2075  | 0.71 | 0.21 | 30 |
| 10 C04F6.1 | NTLEITHK         | 39 | 11663 | 0.71 | 0.07 | 10 |
| 1 C04F6.1  | SITPLRAAELLK     | 24 | 1668  | 0.71 | 0.36 | 51 |
| 22 C04F6.1 | SITPLRAAELLK     | 26 | 6433  | 0.71 | 0.34 | 47 |
| 22 C04F6.1 | MIREIQSEQGFK     | 50 | 3119  | 0.71 | 0.21 | 30 |
| 10 C04F6.1 | NTLEITHK         | 37 | 6934  | 0.72 | 0.18 | 26 |
| 22 C04F6.1 | SLLTFLTNDISK     | 68 | 2976  | 0.72 | 0.10 | 13 |
| 1 C04F6.1  | AEVNPFK          | 23 | 1203  | 0.72 | 0.09 | 13 |
| 10 C04F6.1 | AYNFWTVSEK       | 44 | 2126  | 0.72 | 0.15 | 20 |
| 10 C04F6.1 | AEVNPFK          | 11 | 2169  | 0.72 | 0.11 | 15 |
| 22 C04F6.1 | VHTTIYTK         | 11 | 6365  | 0.72 | 0.14 | 19 |
| 22 C04F6.1 | SITPLRAAELLK     | 39 | 29988 | 0.72 | 0.31 | 43 |
| 10 C04F6.1 | LIEQFYQQGDK      | 35 | 1762  | 0.72 | 0.14 | 19 |
| 1 C04F6.1  | GIPEYELLIK       | 14 | 2092  | 0.72 | 0.27 | 37 |
| 10 C04F6.1 | TQDLPLIRPASRQTK  | 11 | 31057 | 0.72 | 0.07 | 9  |
| 22 C04F6.1 | AARLNQVNVVSEYK   | 13 | 1108  | 0.72 | 0.13 | 18 |
| 10 C04F6.1 | MPTILSINGK       | 63 | 4678  | 0.73 | 0.06 | 8  |
| 22 C04F6.1 | NTIQHLIHHFEK     | 31 | 4048  | 0.73 | 0.14 | 19 |
| 22 C04F6.1 | VHTTIYTK         | 23 | 9835  | 0.73 | 0.26 | 36 |
| 22 C04F6.1 | MIREIQSEQGFK     | 11 | 2517  | 0.73 | 0.21 | 29 |
| 22 C04F6.1 | NTIQHLIHHFEK     | 22 | 826   | 0.73 | 0.31 | 42 |
| 22 C04F6.1 | GIPEYELLIK       | 15 | 4287  | 0.73 | 0.14 | 19 |
| 10 C04F6.1 | SLLTFLTNDISK     | 43 | 1602  | 0.73 | 0.07 | 10 |
| 1 C04F6.1  | AARLNQVNVVSEYK   | 22 | 1124  | 0.73 | 0.15 | 20 |
| 10 C04F6.1 | SLLTFLTNDISK     | 35 | 1638  | 0.73 | 0.20 | 27 |
| 10 C04F6.1 | LIEQFYQQGDK      | 66 | 1355  | 0.73 | 0.09 | 12 |
| 22 C04F6.1 | NTIQHLIHHFEK     | 14 | 3862  | 0.73 | 0.18 | 24 |
| 10 C04F6.1 | VVRREEEIVVK      | 26 | 2412  | 0.74 | 0.18 | 25 |
| 10 C04F6.1 | EGQFVKPQTVYTYTFK | 17 | 3649  | 0.74 | 0.29 | 39 |
| 22 C04F6.1 | LIEQFYQQGDK      | 53 | 3043  | 0.74 | 0.15 | 21 |
| 22 C04F6.1 | SITPLRAAELLK     | 13 | 5712  | 0.74 | 0.36 | 49 |
| 22 C04F6.1 | AARLNQVNVVSEYK   | 24 | 1259  | 0.74 | 0.08 | 11 |
| 7 C04F6.1  | LIEQFYQQGDK      | 49 | 1794  | 0.74 | 0.16 | 22 |
| 10 C04F6.1 | NTIQHLIHHFEK     | 46 | 5551  | 0.74 | 0.07 | 10 |
| 22 C04F6.1 | VHTTIYTK         | 23 | 15921 | 0.74 | 0.24 | 33 |
| 22 C04F6.1 | YVRNGEFDIK       | 11 | 3194  | 0.75 | 0.18 | 24 |
| 22 C04F6.1 | DCSEQPRFAVLAK    | 17 | 4485  | 0.75 | 0.12 | 16 |
| 1 C04F6.1  | AEVNPFK          | 16 | 1024  | 0.75 | 0.29 | 38 |
| 10 C04F6.1 | NTIQHLIHHFEK     | 22 | 4292  | 0.75 | 0.17 | 22 |
| 22 C04F6.1 | SITPLRAAELLK     | 42 | 32507 | 0.76 | 0.31 | 40 |
| 22 C04F6.1 | VHTTIYTK         | 23 | 16684 | 0.76 | 0.32 | 42 |
| 1 C04F6.1  | SITPLRAAELLK     | 23 | 3060  | 0.76 | 0.26 | 34 |
| 10 C04F6.1 | NLITLK           | 32 | 1936  | 0.76 | 0.17 | 23 |
| 1 C04F6.1  | MIREIQSEQGFK     | 12 | 713   | 0.76 | 0.36 | 48 |

|            |                    |    |       |      |      |    |
|------------|--------------------|----|-------|------|------|----|
| 10 C04F6.1 | AARLNQVNVVSEYK     | 48 | 4405  | 0.76 | 0.12 | 16 |
| 22 C04F6.1 | NTLEITHK           | 33 | 17302 | 0.76 | 0.19 | 25 |
| 22 C04F6.1 | MIREIQSEQGFK       | 17 | 2779  | 0.76 | 0.22 | 29 |
| 22 C04F6.1 | MIREIQSEQGFK       | 14 | 2142  | 0.76 | 0.17 | 23 |
| 10 C04F6.1 | VLLPVYK            | 12 | 1836  | 0.76 | 0.38 | 50 |
| 10 C04F6.1 | SLLTFLTNDISK       | 34 | 923   | 0.76 | 0.22 | 29 |
| 1 C04F6.1  | NTLEITHK           | 36 | 3020  | 0.76 | 0.08 | 10 |
| 1 C04F6.1  | NTLEITHK           | 52 | 2116  | 0.76 | 0.11 | 15 |
| 22 C04F6.1 | NTLEITHK           | 30 | 5831  | 0.76 | 0.10 | 13 |
| 1 C04F6.1  | AARLNQVNVVSEYK     | 17 | 433   | 0.76 | 0.15 | 20 |
| 10 C04F6.1 | NAFLPK             | 12 | 708   | 0.77 | 0.05 | 7  |
| 1 C04F6.1  | LIEQFYQQGDK        | 41 | 1070  | 0.77 | 0.12 | 16 |
| 22 C04F6.1 | LIEQFYQQGDK        | 64 | 2874  | 0.77 | 0.10 | 12 |
| 1 C04F6.1  | AYNFWTVSEK         | 31 | 739   | 0.77 | 0.24 | 31 |
| 10 C04F6.1 | AYNFWTVSEK         | 38 | 2001  | 0.77 | 0.06 | 8  |
| 22 C04F6.1 | NTLEITHK           | 48 | 15209 | 0.77 | 0.18 | 24 |
| 10 C04F6.1 | SITPLRAAELLK       | 61 | 15557 | 0.77 | 0.07 | 10 |
| 10 C04F6.1 | MIREIQSEQGFK       | 13 | 1910  | 0.77 | 0.09 | 11 |
| 10 C04F6.1 | AARLNQVNVVSEYK     | 47 | 3280  | 0.77 | 0.14 | 18 |
| 22 C04F6.1 | IESLEQRELSDEFK     | 27 | 2414  | 0.77 | 0.10 | 13 |
| 10 C04F6.1 | AARLNQVNVVSEYK     | 65 | 3338  | 0.77 | 0.14 | 18 |
| 10 C04F6.1 | YVRNGEFDIK         | 11 | 6368  | 0.77 | 0.12 | 15 |
| 22 C04F6.1 | NSEELLVK           | 23 | 2820  | 0.77 | 0.22 | 29 |
| 22 C04F6.1 | AARLNQVNVVSEYK     | 68 | 7024  | 0.78 | 0.13 | 17 |
| 7 C04F6.1  | SITPLRAAELLK       | 14 | 2373  | 0.78 | 0.31 | 40 |
| 22 C04F6.1 | DSLFFNVHEK         | 13 | 8142  | 0.78 | 0.10 | 13 |
| 10 C04F6.1 | NAFLPK             | 14 | 641   | 0.78 | 0.12 | 16 |
| 22 C04F6.1 | MIREIQSEQGFK       | 58 | 4272  | 0.78 | 0.17 | 22 |
| 22 C04F6.1 | MIREIQSEQGFK       | 27 | 4427  | 0.78 | 0.13 | 17 |
| 7 C04F6.1  | AARLNQVNVVSEYK     | 49 | 2028  | 0.78 | 0.18 | 23 |
| 22 C04F6.1 | AARLNQVNVVSEYK     | 26 | 3795  | 0.78 | 0.13 | 17 |
| 10 C04F6.1 | VLLPVYK            | 19 | 7062  | 0.78 | 0.11 | 14 |
| 22 C04F6.1 | LIEQFYQQGDK        | 60 | 1812  | 0.78 | 0.15 | 19 |
| 10 C04F6.1 | AARLNQVNVVSEYK     | 16 | 8037  | 0.78 | 0.14 | 18 |
| 10 C04F6.1 | NLITLK             | 31 | 2419  | 0.79 | 0.15 | 19 |
| 10 C04F6.1 | VVRREEIVVK         | 24 | 2707  | 0.79 | 0.07 | 9  |
| 22 C04F6.1 | NTIQHLIHHFEK       | 13 | 5172  | 0.79 | 0.16 | 20 |
| 10 C04F6.1 | SITPLRAAELLK       | 35 | 11528 | 0.79 | 0.30 | 39 |
| 10 C04F6.1 | VSIELEK            | 13 | 852   | 0.79 | 0.42 | 53 |
| 22 C04F6.1 | SLLTFLTNDISK       | 33 | 1578  | 0.79 | 0.20 | 25 |
| 1 C04F6.1  | AARLNQVNVVSEYK     | 20 | 336   | 0.79 | 0.21 | 27 |
| 22 C04F6.1 | AARLNQVNVVSEYK     | 42 | 2026  | 0.79 | 0.16 | 20 |
| 22 C04F6.1 | IESLEQRELSDEFK     | 42 | 6585  | 0.79 | 0.16 | 20 |
| 1 C04F6.1  | DSLFFNVHEK         | 20 | 1017  | 0.80 | 0.21 | 26 |
| 10 C04F6.1 | MIREIQSEQGFK       | 46 | 3834  | 0.80 | 0.17 | 21 |
| 22 C04F6.1 | NTLEITHK           | 44 | 3665  | 0.80 | 0.17 | 21 |
| 22 C04F6.1 | TMEGDCEVAYTIVQEGEK | 18 | 2170  | 0.80 | 0.19 | 24 |
| 10 C04F6.1 | IESLEQRELSDEFK     | 11 | 2005  | 0.80 | 0.10 | 12 |
| 10 C04F6.1 | MIREIQSEQGFK       | 56 | 3384  | 0.81 | 0.17 | 21 |
| 10 C04F6.1 | VHTTIYTK           | 13 | 16663 | 0.81 | 0.37 | 46 |
| 10 C04F6.1 | AARLNQVNVVSEYK     | 47 | 2092  | 0.81 | 0.21 | 25 |
| 10 C04F6.1 | MIREIQSEQGFK       | 27 | 2197  | 0.81 | 0.10 | 12 |
| 22 C04F6.1 | MIREIQSEQGFK       | 39 | 1836  | 0.82 | 0.21 | 25 |
| 1 C04F6.1  | LIEQFYQQGDK        | 47 | 1498  | 0.82 | 0.10 | 12 |
| 1 C04F6.1  | VHTTIYTK           | 23 | 5340  | 0.82 | 0.14 | 17 |
| 10 C04F6.1 | GIPEYELLIK         | 32 | 2248  | 0.82 | 0.23 | 28 |
| 22 C04F6.1 | AARLNQVNVVSEYK     | 13 | 1504  | 0.82 | 0.17 | 20 |
| 10 C04F6.1 | AYNFWTVSEK         | 47 | 1271  | 0.82 | 0.17 | 20 |
| 22 C04F6.1 | NLITLK             | 13 | 1428  | 0.82 | 0.38 | 47 |
| 1 C04F6.1  | MIREIQSEQGFK       | 13 | 833   | 0.83 | 0.24 | 29 |
| 22 C04F6.1 | AYNFWTVSEK         | 38 | 1708  | 0.83 | 0.09 | 10 |
| 10 C04F6.1 | GIPEYELLIK         | 14 | 2026  | 0.83 | 0.10 | 13 |
| 1 C04F6.1  | DSLFFNVHEK         | 26 | 2807  | 0.83 | 0.13 | 15 |
| 1 C04F6.1  | AARLNQVNVVSEYK     | 11 | 1252  | 0.83 | 0.10 | 12 |
| 10 C04F6.1 | SITPLRAAELLK       | 54 | 2506  | 0.83 | 0.18 | 22 |
| 22 C04F6.1 | VHTTIYTK           | 21 | 7334  | 0.83 | 0.17 | 21 |
| 22 C04F6.1 | NLITLK             | 27 | 1600  | 0.83 | 0.08 | 9  |
| 1 C04F6.1  | MIREIQSEQGFK       | 36 | 1113  | 0.83 | 0.31 | 38 |
| 10 C04F6.1 | NLITLK             | 25 | 2114  | 0.83 | 0.23 | 27 |
| 10 C04F6.1 | NAFLPK             | 12 | 1171  | 0.83 | 0.05 | 6  |
| 22 C04F6.1 | VSIELEK            | 14 | 1184  | 0.83 | 0.26 | 31 |
| 1 C04F6.1  | DSLFFNVHEK         | 20 | 2885  | 0.83 | 0.09 | 11 |
| 10 C04F6.1 | VLLPVYK            | 21 | 7581  | 0.83 | 0.05 | 6  |
| 10 C04F6.1 | NLITLK             | 34 | 2809  | 0.83 | 0.21 | 25 |
| 10 C04F6.1 | LIEQFYQQGDK        | 50 | 1582  | 0.83 | 0.15 | 18 |
| 10 C04F6.1 | NTIQHLIHHFEK       | 34 | 6913  | 0.84 | 0.22 | 27 |
| 10 C04F6.1 | DSLFFNVHEK         | 23 | 5911  | 0.84 | 0.11 | 13 |
| 22 C04F6.1 | VLLPVYK            | 14 | 3492  | 0.84 | 0.06 | 8  |
| 22 C04F6.1 | GIPEYELLIK         | 27 | 3398  | 0.84 | 0.67 | 80 |
| 22 C04F6.1 | NTLEITHK           | 55 | 8775  | 0.85 | 0.06 | 7  |
| 10 C04F6.1 | VHTTIYTK           | 38 | 24227 | 0.85 | 0.52 | 61 |
| 22 C04F6.1 | SLLTFLTNDISK       | 44 | 1618  | 0.85 | 0.25 | 30 |
| 10 C04F6.1 | VTFVEESK           | 47 | 4298  | 0.85 | 0.12 | 14 |
| 10 C04F6.1 | GIPEYELLIK         | 66 | 23358 | 0.85 | 0.22 | 26 |
| 22 C04F6.1 | VSIELEK            | 18 | 1857  | 0.85 | 0.20 | 23 |
| 22 C04F6.1 | SLLTFLTNDISK       | 20 | 1575  | 0.85 | 0.21 | 24 |
| 22 C04F6.1 | LIEQFYQQGDK        | 50 | 2263  | 0.85 | 0.10 | 11 |
| 1 C04F6.1  | MIREIQSEQGFK       | 11 | 980   | 0.85 | 0.12 | 14 |
| 10 C04F6.1 | NTLEITHK           | 24 | 3777  | 0.85 | 0.26 | 30 |
| 22 C04F6.1 | DCSEQPRFAVLAK      | 29 | 4700  | 0.86 | 0.12 | 14 |
| 1 C04F6.1  | NTLEITHK           | 48 | 2408  | 0.86 | 0.22 | 25 |
| 10 C04F6.1 | TMEGDCEVAYTIVQEGEK | 32 | 1108  | 0.86 | 0.16 | 19 |
| 22 C04F6.1 | MPTILSINGK         | 71 | 7452  | 0.86 | 0.09 | 10 |
| 22 C04F6.1 | NSEELLVK           | 20 | 4432  | 0.87 | 0.16 | 18 |
| 22 C04F6.1 | AARLNQVNVVSEYK     | 35 | 1873  | 0.87 | 0.22 | 25 |
| 10 C04F6.1 | AARLNQVNVVSEYK     | 36 | 4264  | 0.87 | 0.11 | 13 |
| 10 C04F6.1 | IESLEQRELSDEFK     | 30 | 2723  | 0.87 | 0.13 | 15 |
| 22 C04F6.1 | TQDLPLIRPASRQTK    | 11 | 5258  | 0.87 | 0.14 | 16 |
| 10 C04F6.1 | SLLTFLTNDISK       | 53 | 1692  | 0.87 | 0.21 | 24 |
| 22 C04F6.1 | AEVNPFK            | 14 | 1460  | 0.87 | 0.17 | 20 |
| 7 C04F6.1  | AYNFWTVSEK         | 28 | 2057  | 0.87 | 0.02 | 3  |

|            |                    |    |       |      |      |    |
|------------|--------------------|----|-------|------|------|----|
| 22 C04F6.1 | NLITLK             | 17 | 2671  | 0.87 | 0.12 | 14 |
| 7 C04F6.1  | VTFVEESK           | 43 | 3833  | 0.87 | 0.25 | 29 |
| 22 C04F6.1 | VLLPVYK            | 13 | 705   | 0.88 | 0.27 | 31 |
| 22 C04F6.1 | GIPEYELLIK         | 15 | 2985  | 0.88 | 0.14 | 16 |
| 1 C04F6.1  | SITPLRAAELLK       | 17 | 777   | 0.88 | 0.08 | 9  |
| 10 C04F6.1 | VSIELEK            | 24 | 1186  | 0.88 | 0.25 | 28 |
| 10 C04F6.1 | GIPEYELLIK         | 53 | 18249 | 0.88 | 0.15 | 18 |
| 1 C04F6.1  | AARLNQVNVVSEYK     | 39 | 5105  | 0.88 | 0.08 | 9  |
| 1 C04F6.1  | SITPLRAAELLK       | 33 | 1459  | 0.89 | 0.29 | 33 |
| 7 C04F6.1  | AEVNPFK            | 11 | 1308  | 0.89 | 0.06 | 7  |
| 22 C04F6.1 | VSIELEK            | 21 | 1431  | 0.89 | 0.13 | 15 |
| 10 C04F6.1 | GIPEYELLIK         | 10 | 3236  | 0.89 | 0.09 | 10 |
| 10 C04F6.1 | VVRREEIVVK         | 22 | 1578  | 0.89 | 0.07 | 8  |
| 22 C04F6.1 | SLLTFLTNDISK       | 68 | 3083  | 0.89 | 0.08 | 8  |
| 22 C04F6.1 | SITPLRAAELLK       | 17 | 2221  | 0.89 | 0.34 | 38 |
| 10 C04F6.1 | TMEGDCEVAYTIVQEGEK | 30 | 1463  | 0.90 | 0.20 | 22 |
| 22 C04F6.1 | MIREIQSEQGFK       | 26 | 5562  | 0.90 | 0.19 | 21 |
| 10 C04F6.1 | NLITLK             | 15 | 1146  | 0.90 | 0.18 | 20 |
| 1 C04F6.1  | LIEQFYQQGDK        | 45 | 1175  | 0.90 | 0.18 | 20 |
| 22 C04F6.1 | VVRREEIVVK         | 21 | 972   | 0.90 | 0.19 | 21 |
| 22 C04F6.1 | GIPEYELLIK         | 24 | 4326  | 0.90 | 0.10 | 11 |
| 22 C04F6.1 | TQDLPLIRPASRQTK    | 11 | 5425  | 0.91 | 0.18 | 20 |
| 22 C04F6.1 | DSLFFNVHEK         | 35 | 4821  | 0.91 | 0.05 | 6  |
| 7 C04F6.1  | SLLTFLTNDISK       | 44 | 1377  | 0.91 | 0.20 | 22 |
| 7 C04F6.1  | NTLEITHK           | 39 | 2006  | 0.91 | 0.33 | 36 |
| 10 C04F6.1 | VTFVEESK           | 48 | 3887  | 0.91 | 0.16 | 17 |
| 10 C04F6.1 | NLITLK             | 12 | 1181  | 0.91 | 0.11 | 12 |
| 10 C04F6.1 | NLITLK             | 13 | 1474  | 0.91 | 0.22 | 24 |
| 10 C04F6.1 | GIPEYELLIK         | 26 | 3404  | 0.91 | 0.23 | 25 |
| 10 C04F6.1 | AARLNQVNVVSEYK     | 63 | 3369  | 0.91 | 0.12 | 13 |
| 22 C04F6.1 | DCSEQPRFAVLAK      | 16 | 6909  | 0.91 | 0.12 | 14 |
| 7 C04F6.1  | AARLNQVNVVSEYK     | 27 | 957   | 0.92 | 0.14 | 16 |
| 22 C04F6.1 | NTLEITHK           | 39 | 4828  | 0.92 | 0.16 | 17 |
| 22 C04F6.1 | TQDLPLIRPASRQTK    | 14 | 7872  | 0.92 | 0.23 | 25 |
| 10 C04F6.1 | NLITLK             | 28 | 1880  | 0.92 | 0.14 | 15 |
| 22 C04F6.1 | AARLNQVNVVSEYK     | 48 | 2742  | 0.92 | 0.24 | 26 |
| 10 C04F6.1 | AARLNQVNVVSEYK     | 66 | 11890 | 0.92 | 0.12 | 13 |
| 1 C04F6.1  | MIREIQSEQGFK       | 47 | 4202  | 0.92 | 0.28 | 30 |
| 22 C04F6.1 | MIREIQSEQGFK       | 35 | 5965  | 0.92 | 0.22 | 24 |
| 22 C04F6.1 | AYNFWTVSEK         | 41 | 2571  | 0.93 | 0.16 | 17 |
| 10 C04F6.1 | MIREIQSEQGFK       | 35 | 3045  | 0.93 | 0.14 | 15 |
| 22 C04F6.1 | MIREIQSEQGFK       | 32 | 2040  | 0.93 | 0.16 | 17 |
| 10 C04F6.1 | SITPLRAAELLK       | 31 | 4041  | 0.93 | 0.25 | 26 |
| 10 C04F6.1 | AARLNQVNVVSEYK     | 16 | 4540  | 0.93 | 0.15 | 16 |
| 22 C04F6.1 | IESLEQRELSDEFK     | 12 | 1995  | 0.94 | 0.33 | 35 |
| 10 C04F6.1 | DSLFFNVHEK         | 12 | 6622  | 0.94 | 0.08 | 8  |
| 22 C04F6.1 | TDLSEIK            | 14 | 579   | 0.94 | 0.12 | 13 |
| 22 C04F6.1 | VVRREEIVVK         | 23 | 2428  | 0.94 | 0.10 | 10 |
| 10 C04F6.1 | SLLTFLTNDISK       | 48 | 1944  | 0.94 | 0.31 | 33 |
| 22 C04F6.1 | NTLEITHK           | 45 | 4352  | 0.95 | 0.21 | 22 |
| 10 C04F6.1 | AARLNQVNVVSEYK     | 52 | 8255  | 0.95 | 0.12 | 12 |
| 22 C04F6.1 | NAFLPK             | 28 | 3529  | 0.95 | 0.08 | 8  |
| 10 C04F6.1 | EEIVYSMENEK        | 28 | 788   | 0.95 | 0.18 | 19 |
| 10 C04F6.1 | AARLNQVNVVSEYK     | 44 | 5040  | 0.95 | 0.13 | 14 |
| 10 C04F6.1 | AARLNQVNVVSEYK     | 38 | 7615  | 0.95 | 0.11 | 12 |
| 22 C04F6.1 | MIREIQSEQGFK       | 60 | 5984  | 0.95 | 0.18 | 19 |
| 22 C04F6.1 | NLITLK             | 14 | 1197  | 0.95 | 0.11 | 11 |
| 7 C04F6.1  | YVRNGEFDIK         | 15 | 9752  | 0.95 | 0.23 | 24 |
| 10 C04F6.1 | TMEGDCEVAYTIVQEGEK | 28 | 1549  | 0.95 | 0.20 | 21 |
| 7 C04F6.1  | MIREIQSEQGFK       | 17 | 2491  | 0.95 | 0.26 | 27 |
| 22 C04F6.1 | DCSEQPRFAVLAK      | 26 | 5196  | 0.95 | 0.16 | 16 |
| 22 C04F6.1 | MIREIQSEQGFK       | 45 | 2310  | 0.96 | 0.12 | 12 |
| 22 C04F6.1 | MIREIQSEQGFK       | 29 | 805   | 0.96 | 0.19 | 20 |
| 22 C04F6.1 | DSLFFNVHEK         | 16 | 5428  | 0.96 | 0.06 | 7  |
| 10 C04F6.1 | AARLNQVNVVSEYK     | 47 | 7486  | 0.96 | 0.05 | 5  |
| 22 C04F6.1 | NLITLK             | 28 | 1697  | 0.96 | 0.15 | 15 |
| 7 C04F6.1  | NLITLK             | 14 | 1987  | 0.96 | 0.32 | 33 |
| 22 C04F6.1 | MIREIQSEQGFK       | 12 | 1004  | 0.97 | 0.10 | 10 |
| 22 C04F6.1 | MIREIQSEQGFK       | 44 | 5185  | 0.97 | 0.19 | 19 |
| 10 C04F6.1 | SITPLRAAELLK       | 33 | 5307  | 0.97 | 0.36 | 37 |
| 22 C04F6.1 | NTLEITHK           | 56 | 8436  | 0.97 | 0.17 | 17 |
| 10 C04F6.1 | GIPEYELLIK         | 29 | 3081  | 0.97 | 0.09 | 10 |
| 22 C04F6.1 | AARLNQVNVVSEYK     | 11 | 4808  | 0.97 | 0.15 | 16 |
| 22 C04F6.1 | SLLTFLTNDISK       | 39 | 1614  | 0.97 | 0.21 | 22 |
| 22 C04F6.1 | AARLNQVNVVSEYK     | 12 | 4150  | 0.97 | 0.13 | 14 |
| 10 C04F6.1 | MIREIQSEQGFK       | 26 | 989   | 0.97 | 0.23 | 23 |
| 1 C04F6.1  | AARLNQVNVVSEYK     | 52 | 4348  | 0.97 | 0.17 | 18 |
| 10 C04F6.1 | DCSEQPRFAVLAK      | 24 | 4730  | 0.98 | 0.13 | 13 |
| 22 C04F6.1 | NLITLK             | 36 | 1586  | 0.98 | 0.14 | 15 |
| 22 C04F6.1 | NLITLK             | 34 | 1739  | 0.98 | 0.17 | 17 |
| 22 C04F6.1 | DCSEQPRFAVLAK      | 23 | 6129  | 0.98 | 0.15 | 15 |
| 10 C04F6.1 | IESLEQRELSDEFK     | 23 | 1530  | 0.98 | 0.09 | 9  |
| 10 C04F6.1 | GIPEYELLIK         | 20 | 2618  | 0.98 | 0.12 | 12 |
| 10 C04F6.1 | MIREIQSEQGFK       | 12 | 1511  | 0.98 | 0.15 | 15 |
| 22 C04F6.1 | DSLFFNVHEK         | 20 | 3758  | 0.98 | 0.22 | 23 |
| 7 C04F6.1  | MIREIQSEQGFK       | 32 | 1598  | 0.99 | 0.37 | 38 |
| 10 C04F6.1 | DSLFFNVHEK         | 11 | 2066  | 0.99 | 0.10 | 11 |
| 7 C04F6.1  | MIREIQSEQGFK       | 20 | 2300  | 0.99 | 0.19 | 19 |
| 22 C04F6.1 | NTLEITHK           | 43 | 5559  | 0.99 | 0.14 | 14 |
| 22 C04F6.1 | MIREIQSEQGFK       | 22 | 2642  | 0.99 | 0.16 | 16 |
| 10 C04F6.1 | LIEQFYQQGDK        | 72 | 3142  | 0.99 | 0.14 | 14 |
| 22 C04F6.1 | NLITLK             | 13 | 1098  | 0.99 | 0.12 | 12 |
| 22 C04F6.1 | VSIELEK            | 29 | 1734  | 0.99 | 0.16 | 16 |
| 22 C04F6.1 | SITPLRAAELLK       | 17 | 3265  | 0.99 | 0.44 | 44 |
| 1 C04F6.1  | SITPLRAAELLK       | 28 | 2290  | 0.99 | 0.36 | 37 |
| 22 C04F6.1 | MIREIQSEQGFK       | 18 | 1879  | 1.00 | 0.09 | 9  |
| 10 C04F6.1 | MIREIQSEQGFK       | 37 | 3233  | 1.00 | 0.11 | 11 |
| 22 C04F6.1 | VVRREEIVVK         | 11 | 19000 | 1.00 | 0.29 | 29 |
| 10 C04F6.1 | MPTILSINGK         | 69 | 7010  | 1.00 | 0.04 | 4  |
| 22 C04F6.1 | MIREIQSEQGFK       | 67 | 3969  | 1.00 | 0.11 | 11 |
| 1 C04F6.1  | LIEQFYQQGDK        | 56 | 934   | 1.00 | 0.24 | 24 |

|            |                |    |       |      |      |    |
|------------|----------------|----|-------|------|------|----|
| 10 C04F6.1 | NTLEITHK       | 47 | 4663  | 1.01 | 0.12 | 12 |
| 10 C04F6.1 | SITPLRAAELLK   | 15 | 2274  | 1.01 | 0.06 | 6  |
| 10 C04F6.1 | LIEQFYQQGDK    | 69 | 2126  | 1.01 | 0.17 | 17 |
| 22 C04F6.1 | MIREIQSEQGFK   | 24 | 2646  | 1.01 | 0.09 | 9  |
| 22 C04F6.1 | MPTILSINGK     | 60 | 6129  | 1.01 | 0.05 | 5  |
| 22 C04F6.1 | MIREIQSEQGFK   | 42 | 975   | 1.01 | 0.16 | 16 |
| 10 C04F6.1 | VSIELEK        | 18 | 1040  | 1.01 | 0.12 | 12 |
| 10 C04F6.1 | MIREIQSEQGFK   | 22 | 1242  | 1.02 | 0.10 | 10 |
| 10 C04F6.1 | SITPLRAAELLK   | 54 | 50326 | 1.02 | 0.24 | 24 |
| 22 C04F6.1 | NTIQHLIHHFEK   | 21 | 3730  | 1.02 | 0.09 | 9  |
| 7 C04F6.1  | AARLNQVNVVSEYK | 31 | 854   | 1.02 | 0.33 | 32 |
| 10 C04F6.1 | DCSEQPRFAVLAK  | 20 | 3176  | 1.02 | 0.09 | 9  |
| 10 C04F6.1 | VLLPVYK        | 13 | 2755  | 1.02 | 0.07 | 7  |
| 10 C04F6.1 | NLITLK         | 26 | 2458  | 1.02 | 0.10 | 10 |
| 1 C04F6.1  | MIREIQSEQGFK   | 38 | 3354  | 1.03 | 0.21 | 20 |
| 10 C04F6.1 | GIPEYELLIK     | 18 | 4619  | 1.03 | 0.25 | 25 |
| 10 C04F6.1 | VLLPVYK        | 13 | 2281  | 1.03 | 0.07 | 7  |
| 10 C04F6.1 | GIPEYELLIK     | 17 | 6320  | 1.04 | 0.08 | 7  |
| 22 C04F6.1 | MIREIQSEQGFK   | 31 | 916   | 1.04 | 0.16 | 15 |
| 22 C04F6.1 | LIEQFYQQGDK    | 54 | 2558  | 1.04 | 0.13 | 13 |
| 1 C04F6.1  | DSLFFNVHEK     | 31 | 3212  | 1.05 | 0.07 | 7  |
| 22 C04F6.1 | VVRREEIVVK     | 15 | 8741  | 1.05 | 0.09 | 9  |
| 10 C04F6.1 | MPTILSINGK     | 64 | 4173  | 1.05 | 0.09 | 8  |
| 10 C04F6.1 | SITPLRAAELLK   | 44 | 7670  | 1.05 | 0.20 | 19 |
| 10 C04F6.1 | NTLEITHK       | 24 | 13291 | 1.05 | 0.09 | 9  |
| 10 C04F6.1 | VLLPVYK        | 10 | 3296  | 1.05 | 0.06 | 6  |
| 22 C04F6.1 | FIRNIEREYK     | 13 | 2681  | 1.05 | 0.33 | 32 |
| 22 C04F6.1 | AARLNQVNVVSEYK | 33 | 2465  | 1.05 | 0.11 | 10 |
| 10 C04F6.1 | SITPLRAAELLK   | 15 | 1931  | 1.05 | 0.34 | 32 |
| 1 C04F6.1  | MIREIQSEQGFK   | 15 | 852   | 1.05 | 0.10 | 9  |
| 1 C04F6.1  | SITPLRAAELLK   | 14 | 1111  | 1.06 | 0.30 | 29 |
| 10 C04F6.1 | SITPLRAAELLK   | 21 | 1114  | 1.06 | 0.27 | 25 |
| 1 C04F6.1  | MIREIQSEQGFK   | 10 | 826   | 1.06 | 0.19 | 18 |
| 22 C04F6.1 | VHTTIYTK       | 43 | 30433 | 1.06 | 0.17 | 16 |
| 10 C04F6.1 | LIEQFYQQGDK    | 73 | 1895  | 1.06 | 0.07 | 7  |
| 22 C04F6.1 | MPTILSINGK     | 43 | 5573  | 1.06 | 0.16 | 15 |
| 1 C04F6.1  | DSLFFNVHEK     | 28 | 2748  | 1.06 | 0.13 | 12 |
| 10 C04F6.1 | MIREIQSEQGFK   | 11 | 2957  | 1.06 | 0.15 | 14 |
| 10 C04F6.1 | SITPLRAAELLK   | 63 | 42787 | 1.06 | 0.24 | 23 |
| 10 C04F6.1 | AARLNQVNVVSEYK | 63 | 11442 | 1.06 | 0.09 | 9  |
| 1 C04F6.1  | NLITLK         | 12 | 1002  | 1.07 | 0.08 | 7  |
| 22 C04F6.1 | DSLFFNVHEK     | 24 | 5885  | 1.07 | 0.13 | 12 |
| 22 C04F6.1 | VTFVEESK       | 17 | 3227  | 1.07 | 0.25 | 24 |
| 22 C04F6.1 | SLLTFLTNSDK    | 23 | 997   | 1.08 | 0.24 | 22 |
| 10 C04F6.1 | DCSEQPRFAVLAK  | 34 | 1810  | 1.08 | 0.21 | 20 |
| 22 C04F6.1 | DSLFFNVHEK     | 26 | 3841  | 1.08 | 0.08 | 7  |
| 10 C04F6.1 | VLLPVYK        | 31 | 4100  | 1.08 | 0.15 | 14 |
| 1 C04F6.1  | SITPLRAAELLK   | 42 | 2008  | 1.08 | 0.15 | 13 |
| 7 C04F6.1  | MIREIQSEQGFK   | 11 | 588   | 1.08 | 0.17 | 16 |
| 22 C04F6.1 | SITPLRAAELLK   | 25 | 8699  | 1.08 | 0.34 | 32 |
| 10 C04F6.1 | VVRREEIVVK     | 10 | 889   | 1.09 | 0.20 | 18 |
| 1 C04F6.1  | DCSEQPRFAVLAK  | 14 | 1721  | 1.09 | 0.24 | 22 |
| 1 C04F6.1  | MIREIQSEQGFK   | 15 | 1142  | 1.09 | 0.22 | 20 |
| 22 C04F6.1 | GIPEYELLIK     | 13 | 3162  | 1.09 | 0.24 | 22 |
| 22 C04F6.1 | SEYVYK         | 19 | 895   | 1.09 | 0.04 | 4  |
| 7 C04F6.1  | GIPEYELLIK     | 17 | 3947  | 1.09 | 0.23 | 21 |
| 1 C04F6.1  | MIREIQSEQGFK   | 10 | 778   | 1.09 | 0.30 | 27 |
| 22 C04F6.1 | VTFVEESK       | 36 | 2826  | 1.09 | 0.23 | 21 |
| 1 C04F6.1  | SITPLRAAELLK   | 26 | 2685  | 1.10 | 0.06 | 5  |
| 10 C04F6.1 | AARLNQVNVVSEYK | 64 | 7063  | 1.10 | 0.08 | 8  |
| 22 C04F6.1 | DCSEQPRFAVLAK  | 23 | 3843  | 1.11 | 0.24 | 21 |
| 10 C04F6.1 | VLLPVYK        | 14 | 4200  | 1.11 | 0.10 | 9  |
| 22 C04F6.1 | SITPLRAAELLK   | 16 | 3692  | 1.11 | 0.26 | 23 |
| 10 C04F6.1 | DSLFFNVHEK     | 15 | 6290  | 1.11 | 0.12 | 11 |
| 7 C04F6.1  | NTLEITHK       | 10 | 2332  | 1.12 | 0.23 | 21 |
| 10 C04F6.1 | VVRREEIVVK     | 10 | 10862 | 1.12 | 0.22 | 20 |
| 10 C04F6.1 | GIPEYELLIK     | 17 | 2934  | 1.12 | 0.10 | 9  |
| 22 C04F6.1 | VVRREEIVVK     | 24 | 3830  | 1.12 | 0.11 | 10 |
| 22 C04F6.1 | NSEELLVK       | 21 | 2190  | 1.12 | 0.17 | 15 |
| 10 C04F6.1 | AARLNQVNVVSEYK | 14 | 4252  | 1.13 | 0.13 | 11 |
| 10 C04F6.1 | VVRREEIVVK     | 11 | 1421  | 1.13 | 0.04 | 4  |
| 10 C04F6.1 | VLLPVYK        | 29 | 3528  | 1.14 | 0.09 | 8  |
| 10 C04F6.1 | SITPLRAAELLK   | 33 | 4857  | 1.14 | 0.26 | 23 |
| 22 C04F6.1 | GIPEYELLIK     | 16 | 2757  | 1.14 | 0.09 | 8  |
| 10 C04F6.1 | AEVNPFK        | 10 | 1740  | 1.14 | 0.28 | 24 |
| 22 C04F6.1 | GIPEYELLIK     | 16 | 2781  | 1.14 | 0.12 | 10 |
| 10 C04F6.1 | AARLNQVNVVSEYK | 17 | 2752  | 1.15 | 0.29 | 25 |
| 22 C04F6.1 | NTLEITHK       | 64 | 10309 | 1.15 | 0.16 | 14 |
| 22 C04F6.1 | NTLEITHK       | 50 | 5801  | 1.15 | 0.14 | 12 |
| 10 C04F6.1 | MIREIQSEQGFK   | 11 | 1457  | 1.15 | 0.05 | 4  |
| 7 C04F6.1  | SITPLRAAELLK   | 23 | 1027  | 1.15 | 0.04 | 3  |
| 22 C04F6.1 | AARLNQVNVVSEYK | 35 | 2205  | 1.15 | 0.07 | 6  |
| 10 C04F6.1 | MIREIQSEQGFK   | 26 | 2800  | 1.16 | 0.16 | 14 |
| 22 C04F6.1 | VVRREEIVVK     | 36 | 3948  | 1.16 | 0.07 | 6  |
| 22 C04F6.1 | NAFLPK         | 29 | 1243  | 1.16 | 0.15 | 13 |
| 22 C04F6.1 | VHTTIYTK       | 28 | 12647 | 1.16 | 0.15 | 13 |
| 22 C04F6.1 | DSLFFNVHEK     | 18 | 3467  | 1.16 | 0.13 | 11 |
| 22 C04F6.1 | MIREIQSEQGFK   | 44 | 2712  | 1.16 | 0.11 | 9  |
| 10 C04F6.1 | MIREIQSEQGFK   | 30 | 5312  | 1.17 | 0.16 | 14 |
| 10 C04F6.1 | VLLPVYK        | 14 | 4125  | 1.18 | 0.09 | 8  |
| 10 C04F6.1 | NLITLK         | 28 | 1853  | 1.18 | 0.14 | 12 |
| 1 C04F6.1  | SITPLRAAELLK   | 22 | 3295  | 1.18 | 0.16 | 13 |
| 22 C04F6.1 | NLITLK         | 24 | 1174  | 1.18 | 0.13 | 11 |
| 22 C04F6.1 | AARLNQVNVVSEYK | 51 | 3714  | 1.18 | 0.09 | 8  |
| 1 C04F6.1  | DSLFFNVHEK     | 41 | 4299  | 1.19 | 0.05 | 4  |
| 22 C04F6.1 | VHTTIYTK       | 32 | 14698 | 1.19 | 0.09 | 8  |
| 10 C04F6.1 | LIEQFYQQGDK    | 58 | 1720  | 1.19 | 0.19 | 16 |
| 22 C04F6.1 | NTIQHLIHHFEK   | 14 | 3032  | 1.19 | 0.33 | 28 |
| 10 C04F6.1 | MPTILSINGK     | 53 | 6005  | 1.19 | 0.09 | 8  |
| 10 C04F6.1 | GIPEYELLIK     | 46 | 14692 | 1.19 | 0.15 | 13 |
| 10 C04F6.1 | AARLNQVNVVSEYK | 48 | 6023  | 1.20 | 0.11 | 9  |

|            |                    |    |       |      |      |    |
|------------|--------------------|----|-------|------|------|----|
| 7 C04F6.1  | NTLEITHK           | 33 | 2947  | 1.20 | 0.13 | 11 |
| 1 C04F6.1  | DSLFFNVHEK         | 25 | 1489  | 1.20 | 0.04 | 4  |
| 10 C04F6.1 | VVRREEIVVK         | 14 | 10630 | 1.20 | 0.18 | 15 |
| 22 C04F6.1 | AYNFWTVSEK         | 10 | 627   | 1.20 | 0.21 | 17 |
| 22 C04F6.1 | VHTTIYTK           | 35 | 36467 | 1.21 | 0.04 | 4  |
| 10 C04F6.1 | AARLNQVNVVSEYK     | 17 | 3275  | 1.21 | 0.08 | 6  |
| 10 C04F6.1 | MIREIQSEQGFK       | 10 | 1871  | 1.21 | 0.08 | 6  |
| 7 C04F6.1  | SITPLRAAELLK       | 28 | 2247  | 1.21 | 0.10 | 8  |
| 1 C04F6.1  | MIREIQSEQGFK       | 40 | 1213  | 1.22 | 0.12 | 9  |
| 7 C04F6.1  | SITPLRAAELLK       | 47 | 10505 | 1.22 | 0.33 | 27 |
| 22 C04F6.1 | MIREIQSEQGFK       | 57 | 3764  | 1.22 | 0.12 | 10 |
| 22 C04F6.1 | GIPEYELLIK         | 11 | 2442  | 1.22 | 0.15 | 12 |
| 10 C04F6.1 | MPTILSINGK         | 74 | 6746  | 1.22 | 0.09 | 7  |
| 7 C04F6.1  | MIREIQSEQGFK       | 17 | 1582  | 1.22 | 0.18 | 15 |
| 1 C04F6.1  | SLLTFLTNDISK       | 39 | 1423  | 1.22 | 0.22 | 18 |
| 22 C04F6.1 | DCSEQPRFAVLAK      | 19 | 5990  | 1.22 | 0.28 | 23 |
| 1 C04F6.1  | MIREIQSEQGFK       | 59 | 2783  | 1.23 | 0.21 | 17 |
| 10 C04F6.1 | GIPEYELLIK         | 35 | 8137  | 1.23 | 0.13 | 10 |
| 22 C04F6.1 | SITPLRAAELLK       | 33 | 2562  | 1.23 | 0.29 | 24 |
| 1 C04F6.1  | VLLPVYK            | 15 | 3440  | 1.23 | 0.06 | 5  |
| 1 C04F6.1  | MIREIQSEQGFK       | 52 | 4697  | 1.24 | 0.18 | 15 |
| 10 C04F6.1 | VHTTIYTK           | 21 | 20873 | 1.24 | 0.11 | 9  |
| 10 C04F6.1 | GIPEYELLIK         | 49 | 13213 | 1.24 | 0.16 | 13 |
| 10 C04F6.1 | VHTTIYTK           | 18 | 17979 | 1.25 | 0.03 | 2  |
| 1 C04F6.1  | GIPEYELLIK         | 17 | 871   | 1.25 | 0.28 | 23 |
| 22 C04F6.1 | GIPEYELLIK         | 14 | 1592  | 1.26 | 0.31 | 24 |
| 22 C04F6.1 | VVRREEIVVK         | 15 | 7628  | 1.26 | 0.09 | 7  |
| 10 C04F6.1 | TMEGDCEVAYTIVQEGEK | 34 | 1309  | 1.26 | 0.18 | 15 |
| 1 C04F6.1  | FIRNIERYK          | 10 | 3943  | 1.27 | 0.22 | 17 |
| 7 C04F6.1  | AARLNQVNVVSEYK     | 11 | 911   | 1.27 | 0.29 | 22 |
| 7 C04F6.1  | RSILNLFSLRK        | 18 | 4138  | 1.27 | 0.12 | 9  |
| 10 C04F6.1 | VLLPVYK            | 14 | 4146  | 1.28 | 0.16 | 12 |
| 22 C04F6.1 | VVRREEIVVK         | 10 | 19550 | 1.28 | 0.21 | 16 |
| 10 C04F6.1 | MIREIQSEQGFK       | 28 | 2612  | 1.28 | 0.17 | 13 |
| 10 C04F6.1 | DCSEQPRFAVLAK      | 15 | 3005  | 1.28 | 0.10 | 7  |
| 22 C04F6.1 | VHTTIYTK           | 43 | 11721 | 1.28 | 0.08 | 6  |
| 7 C04F6.1  | MIREIQSEQGFK       | 32 | 2041  | 1.29 | 0.29 | 22 |
| 10 C04F6.1 | AARLNQVNVVSEYK     | 48 | 2614  | 1.29 | 0.16 | 12 |
| 22 C04F6.1 | VHTTIYTK           | 25 | 23499 | 1.30 | 0.04 | 3  |
| 10 C04F6.1 | NLITLK             | 14 | 1673  | 1.30 | 0.29 | 22 |
| 22 C04F6.1 | VVRREEIVVK         | 17 | 7627  | 1.30 | 0.13 | 10 |
| 7 C04F6.1  | NAFLPK             | 20 | 798   | 1.30 | 0.21 | 16 |
| 22 C04F6.1 | GIPEYELLIK         | 14 | 4453  | 1.30 | 0.24 | 19 |
| 1 C04F6.1  | MIREIQSEQGFK       | 12 | 1997  | 1.30 | 0.06 | 5  |
| 1 C04F6.1  | VHTTIYTK           | 24 | 5728  | 1.30 | 0.20 | 16 |
| 10 C04F6.1 | TMEGDCEVAYTIVQEGEK | 18 | 1789  | 1.31 | 0.12 | 9  |
| 22 C04F6.1 | GIPEYELLIK         | 25 | 5174  | 1.31 | 0.20 | 15 |
| 10 C04F6.1 | AARLNQVNVVSEYK     | 42 | 4507  | 1.31 | 0.11 | 8  |
| 10 C04F6.1 | FVVPENK            | 12 | 2004  | 1.32 | 0.04 | 3  |
| 10 C04F6.1 | MIREIQSEQGFK       | 53 | 3764  | 1.32 | 0.22 | 16 |
| 7 C04F6.1  | GIPEYELLIK         | 13 | 3168  | 1.32 | 0.09 | 7  |
| 10 C04F6.1 | AARLNQVNVVSEYK     | 34 | 4849  | 1.32 | 0.12 | 9  |
| 10 C04F6.1 | TQDLPLIRPASRQTK    | 12 | 17203 | 1.32 | 0.08 | 6  |
| 10 C04F6.1 | AARLNQVNVVSEYK     | 11 | 3943  | 1.32 | 0.09 | 7  |
| 1 C04F6.1  | DSLFFNVHEK         | 11 | 2264  | 1.33 | 0.23 | 17 |
| 7 C04F6.1  | SLLTFLTNDISK       | 38 | 1731  | 1.33 | 0.19 | 14 |
| 10 C04F6.1 | LIEQFYQQGDK        | 61 | 2663  | 1.33 | 0.13 | 10 |
| 10 C04F6.1 | TQDLPLIRPASRQTK    | 27 | 17329 | 1.34 | 0.17 | 13 |
| 22 C04F6.1 | MIREIQSEQGFK       | 24 | 867   | 1.34 | 0.17 | 13 |
| 1 C04F6.1  | AARLNQVNVVSEYK     | 21 | 1366  | 1.34 | 0.19 | 14 |
| 1 C04F6.1  | MIREIQSEQGFK       | 15 | 752   | 1.34 | 0.25 | 19 |
| 10 C04F6.1 | MIREIQSEQGFK       | 18 | 1894  | 1.35 | 0.19 | 14 |
| 10 C04F6.1 | GIPEYELLIK         | 36 | 13121 | 1.35 | 0.18 | 13 |
| 10 C04F6.1 | SITPLRAAELLK       | 45 | 12471 | 1.36 | 0.26 | 19 |
| 10 C04F6.1 | DCSEQPRFAVLAK      | 25 | 3793  | 1.36 | 0.11 | 8  |
| 10 C04F6.1 | NTLEITHK           | 50 | 6007  | 1.36 | 0.11 | 8  |
| 7 C04F6.1  | GIPEYELLIK         | 25 | 4635  | 1.37 | 0.36 | 26 |
| 1 C04F6.1  | VLLPVYK            | 17 | 3207  | 1.37 | 0.12 | 9  |
| 10 C04F6.1 | NTIQHLIHHFEK       | 29 | 8511  | 1.37 | 0.14 | 10 |
| 10 C04F6.1 | NTLEITHK           | 61 | 7463  | 1.38 | 0.14 | 10 |
| 10 C04F6.1 | VLLPVYK            | 18 | 4712  | 1.39 | 0.07 | 5  |
| 22 C04F6.1 | MPTILSINGK         | 11 | 1493  | 1.39 | 0.14 | 10 |
| 1 C04F6.1  | NTLEITHK           | 41 | 1820  | 1.39 | 0.11 | 8  |
| 1 C04F6.1  | MIREIQSEQGFK       | 16 | 684   | 1.40 | 0.23 | 16 |
| 22 C04F6.1 | DCSEQPRFAVLAK      | 30 | 6194  | 1.40 | 0.10 | 7  |
| 1 C04F6.1  | MIREIQSEQGFK       | 53 | 2094  | 1.40 | 0.14 | 10 |
| 10 C04F6.1 | SITPLRAAELLK       | 25 | 3259  | 1.40 | 0.25 | 18 |
| 10 C04F6.1 | MIREIQSEQGFK       | 17 | 1396  | 1.40 | 0.11 | 8  |
| 10 C04F6.1 | TMEGDCEVAYTIVQEGEK | 32 | 1339  | 1.40 | 0.13 | 9  |
| 1 C04F6.1  | VHTTIYTK           | 11 | 3224  | 1.41 | 0.07 | 5  |
| 10 C04F6.1 | AARLNQVNVVSEYK     | 52 | 2326  | 1.41 | 0.14 | 10 |
| 10 C04F6.1 | AYNFWTVSEK         | 48 | 1559  | 1.41 | 0.13 | 9  |
| 10 C04F6.1 | NLITLK             | 29 | 1437  | 1.42 | 0.09 | 7  |
| 7 C04F6.1  | SITPLRAAELLK       | 20 | 3116  | 1.42 | 0.15 | 11 |
| 22 C04F6.1 | MIREIQSEQGFK       | 14 | 1578  | 1.42 | 0.11 | 7  |
| 10 C04F6.1 | MIREIQSEQGFK       | 16 | 3675  | 1.42 | 0.23 | 16 |
| 22 C04F6.1 | NLITLK             | 11 | 2125  | 1.42 | 0.06 | 4  |
| 22 C04F6.1 | SITPLRAAELLK       | 17 | 3695  | 1.43 | 0.23 | 16 |
| 22 C04F6.1 | NTIQHLIHHFEK       | 20 | 4291  | 1.43 | 0.30 | 21 |
| 10 C04F6.1 | GIPEYELLIK         | 51 | 12447 | 1.43 | 0.08 | 6  |
| 10 C04F6.1 | MIREIQSEQGFK       | 21 | 1321  | 1.44 | 0.15 | 11 |
| 1 C04F6.1  | GIPEYELLIK         | 15 | 2587  | 1.44 | 0.19 | 13 |
| 7 C04F6.1  | MIREIQSEQGFK       | 21 | 2129  | 1.45 | 0.20 | 13 |
| 10 C04F6.1 | AEVNPFK            | 18 | 1794  | 1.45 | 0.18 | 12 |
| 10 C04F6.1 | GIPEYELLIK         | 25 | 5156  | 1.45 | 0.10 | 7  |
| 10 C04F6.1 | DCSEQPRFAVLAK      | 31 | 4338  | 1.45 | 0.20 | 14 |
| 1 C04F6.1  | NTLEITHK           | 42 | 2856  | 1.45 | 0.10 | 7  |
| 22 C04F6.1 | NLITLK             | 30 | 2548  | 1.46 | 0.20 | 14 |
| 10 C04F6.1 | VHTTIYTK           | 42 | 23494 | 1.46 | 0.07 | 5  |
| 10 C04F6.1 | NTLEITHK           | 61 | 9949  | 1.46 | 0.07 | 5  |
| 1 C04F6.1  | DSLFFNVHEK         | 17 | 1393  | 1.46 | 0.08 | 5  |

|            |                        |    |       |      |      |    |
|------------|------------------------|----|-------|------|------|----|
| 10 C04F6.1 | NTLEITHK               | 50 | 5895  | 1.48 | 0.15 | 10 |
| 7 C04F6.1  | NLITLK                 | 10 | 902   | 1.48 | 0.14 | 9  |
| 1 C04F6.1  | SLLTFLTNDISK           | 28 | 1156  | 1.48 | 0.11 | 7  |
| 7 C04F6.1  | AARLNQVNVVSEYK         | 22 | 964   | 1.48 | 0.23 | 15 |
| 1 C04F6.1  | FIRNIEREYK             | 13 | 2025  | 1.48 | 0.27 | 18 |
| 10 C04F6.1 | VHTTIYTK               | 53 | 48649 | 1.49 | 0.17 | 11 |
| 10 C04F6.1 | VVRREEEIVVK            | 21 | 3977  | 1.49 | 0.14 | 9  |
| 1 C04F6.1  | MIREIQSEQGFK           | 45 | 896   | 1.49 | 0.18 | 12 |
| 10 C04F6.1 | MIREIQSEQGFK           | 15 | 1319  | 1.49 | 0.17 | 11 |
| 22 C04F6.1 | SITPLRAAELLK           | 26 | 1522  | 1.50 | 0.07 | 5  |
| 22 C04F6.1 | VHTTIYTK               | 29 | 7935  | 1.50 | 0.08 | 5  |
| 22 C04F6.1 | AARLNQVNVVSEYK         | 15 | 4551  | 1.50 | 0.20 | 13 |
| 10 C04F6.1 | YVRNGEFDIK             | 12 | 2392  | 1.51 | 0.12 | 8  |
| 7 C04F6.1  | AARLNQVNVVSEYK         | 28 | 1053  | 1.51 | 0.15 | 10 |
| 10 C04F6.1 | MIREIQSEQGFK           | 11 | 1845  | 1.51 | 0.12 | 8  |
| 22 C04F6.1 | NAFLPK                 | 14 | 864   | 1.51 | 0.13 | 8  |
| 1 C04F6.1  | AYNFWTVSEK             | 25 | 1103  | 1.51 | 0.14 | 9  |
| 10 C04F6.1 | VVRREEEIVVK            | 25 | 1986  | 1.52 | 0.16 | 11 |
| 10 C04F6.1 | MIREIQSEQGFK           | 15 | 2410  | 1.52 | 0.14 | 9  |
| 7 C04F6.1  | SITPLRAAELLK           | 31 | 8524  | 1.52 | 0.53 | 35 |
| 10 C04F6.1 | VHTTIYTK               | 33 | 14611 | 1.52 | 0.03 | 2  |
| 10 C04F6.1 | MIREIQSEQGFK           | 68 | 8385  | 1.53 | 0.19 | 13 |
| 1 C04F6.1  | MIREIQSEQGFK           | 44 | 1835  | 1.53 | 0.32 | 21 |
| 1 C04F6.1  | MIREIQSEQGFK           | 16 | 1057  | 1.53 | 0.28 | 19 |
| 1 C04F6.1  | MIREIQSEQGFK           | 45 | 1235  | 1.53 | 0.18 | 12 |
| 22 C04F6.1 | NTLEITHK               | 55 | 4861  | 1.53 | 0.11 | 7  |
| 10 C04F6.1 | SITPLRAAELLK           | 44 | 8769  | 1.53 | 0.23 | 15 |
| 22 C04F6.1 | NLITLK                 | 43 | 2997  | 1.53 | 0.14 | 9  |
| 22 C04F6.1 | YVRNGEFDIK             | 11 | 3699  | 1.53 | 0.18 | 11 |
| 22 C04F6.1 | GIPEYELLIK             | 14 | 4654  | 1.54 | 0.44 | 29 |
| 10 C04F6.1 | VHTTIYTK               | 20 | 23112 | 1.54 | 0.06 | 4  |
| 7 C04F6.1  | DSLFFNVHEK             | 11 | 3650  | 1.54 | 0.07 | 5  |
| 10 C04F6.1 | NAFLPK                 | 13 | 1231  | 1.55 | 0.12 | 8  |
| 22 C04F6.1 | NLITLK                 | 24 | 2117  | 1.55 | 0.07 | 4  |
| 10 C04F6.1 | GIPEYELLIK             | 13 | 2525  | 1.56 | 0.22 | 14 |
| 22 C04F6.1 | QSDELRSRRVQSGIQMLQEIVK | 14 | 2399  | 1.56 | 0.33 | 21 |
| 1 C04F6.1  | VHTTIYTK               | 25 | 5041  | 1.56 | 0.08 | 5  |
| 10 C04F6.1 | FIRNIEREYK             | 17 | 2329  | 1.57 | 0.27 | 17 |
| 1 C04F6.1  | MIREIQSEQGFK           | 16 | 867   | 1.57 | 0.15 | 10 |
| 10 C04F6.1 | LIEQFYQQGDK            | 62 | 1848  | 1.58 | 0.23 | 15 |
| 7 C04F6.1  | AARLNQVNVVSEYK         | 39 | 723   | 1.58 | 0.19 | 12 |
| 22 C04F6.1 | SITPLRAAELLK           | 11 | 4254  | 1.58 | 0.25 | 16 |
| 10 C04F6.1 | MIREIQSEQGFK           | 25 | 5205  | 1.58 | 0.20 | 13 |
| 1 C04F6.1  | SITPLRAAELLK           | 32 | 1722  | 1.58 | 0.19 | 12 |
| 10 C04F6.1 | VHTTIYTK               | 33 | 35935 | 1.58 | 0.06 | 4  |
| 1 C04F6.1  | MIREIQSEQGFK           | 27 | 1191  | 1.59 | 0.14 | 9  |
| 10 C04F6.1 | SITPLRAAELLK           | 29 | 7788  | 1.59 | 0.27 | 17 |
| 22 C04F6.1 | VHTTIYTK               | 26 | 14670 | 1.59 | 0.05 | 3  |
| 22 C04F6.1 | NTLEITHK               | 62 | 6375  | 1.59 | 0.11 | 7  |
| 7 C04F6.1  | MIREIQSEQGFK           | 10 | 530   | 1.60 | 0.16 | 10 |
| 22 C04F6.1 | SLLTFLTNDISK           | 31 | 1272  | 1.60 | 0.25 | 16 |
| 10 C04F6.1 | MIREIQSEQGFK           | 42 | 5622  | 1.61 | 0.19 | 12 |
| 10 C04F6.1 | MIREIQSEQGFK           | 47 | 6349  | 1.61 | 0.19 | 12 |
| 10 C04F6.1 | AARLNQVNVVSEYK         | 18 | 6410  | 1.62 | 0.19 | 12 |
| 22 C04F6.1 | MIREIQSEQGFK           | 39 | 2084  | 1.63 | 0.21 | 13 |
| 22 C04F6.1 | EGQFVKPQTVYTYTFK       | 57 | 4506  | 1.63 | 0.09 | 6  |
| 22 C04F6.1 | MIREIQSEQGFK           | 18 | 1419  | 1.63 | 0.10 | 6  |
| 22 C04F6.1 | VVRREEEIVVK            | 27 | 5015  | 1.64 | 0.08 | 5  |
| 10 C04F6.1 | VHTTIYTK               | 32 | 24455 | 1.65 | 0.19 | 11 |
| 1 C04F6.1  | GIPEYELLIK             | 12 | 1022  | 1.65 | 0.18 | 11 |
| 10 C04F6.1 | NLITLK                 | 19 | 1302  | 1.65 | 0.17 | 10 |
| 22 C04F6.1 | VHTTIYTK               | 39 | 18970 | 1.65 | 0.21 | 13 |
| 7 C04F6.1  | SITPLRAAELLK           | 31 | 1025  | 1.65 | 0.26 | 15 |
| 1 C04F6.1  | MIREIQSEQGFK           | 30 | 1208  | 1.66 | 0.30 | 18 |
| 7 C04F6.1  | NAFLPK                 | 11 | 1008  | 1.66 | 0.11 | 7  |
| 1 C04F6.1  | AARLNQVNVVSEYK         | 28 | 855   | 1.67 | 0.12 | 7  |
| 1 C04F6.1  | AARLNQVNVVSEYK         | 38 | 1673  | 1.67 | 0.12 | 7  |
| 10 C04F6.1 | AYNFWTVSEK             | 38 | 2688  | 1.67 | 0.13 | 7  |
| 10 C04F6.1 | FVVPENK                | 13 | 2131  | 1.68 | 0.15 | 9  |
| 22 C04F6.1 | MIREIQSEQGFK           | 22 | 2520  | 1.68 | 0.27 | 16 |
| 7 C04F6.1  | MIREIQSEQGFK           | 57 | 3567  | 1.68 | 0.22 | 13 |
| 7 C04F6.1  | NLITLK                 | 14 | 784   | 1.69 | 0.21 | 12 |
| 10 C04F6.1 | VVRREEEIVVK            | 33 | 10821 | 1.69 | 0.14 | 8  |
| 22 C04F6.1 | YVRNGEFDIK             | 14 | 4565  | 1.69 | 0.14 | 9  |
| 22 C04F6.1 | NAFLPK                 | 38 | 1403  | 1.69 | 0.12 | 7  |
| 10 C04F6.1 | SLLTFLTNDISK           | 30 | 964   | 1.70 | 0.12 | 7  |
| 10 C04F6.1 | MIREIQSEQGFK           | 26 | 3429  | 1.71 | 0.16 | 9  |
| 10 C04F6.1 | MIREIQSEQGFK           | 62 | 6869  | 1.71 | 0.07 | 4  |
| 1 C04F6.1  | NTLEITHK               | 28 | 1418  | 1.71 | 0.27 | 16 |
| 10 C04F6.1 | MPTILSINGK             | 25 | 3999  | 1.71 | 0.05 | 3  |
| 22 C04F6.1 | DCSEQPRFAVLAK          | 20 | 2322  | 1.71 | 0.34 | 20 |
| 22 C04F6.1 | NARRFLK                | 14 | 2401  | 1.71 | 0.18 | 10 |
| 10 C04F6.1 | NLITLK                 | 10 | 1112  | 1.72 | 0.10 | 6  |
| 1 C04F6.1  | DSLFFNVHEK             | 27 | 1962  | 1.73 | 0.16 | 9  |
| 7 C04F6.1  | NTLEITHK               | 39 | 2143  | 1.73 | 0.17 | 10 |
| 10 C04F6.1 | SITPLRAAELLK           | 35 | 1376  | 1.73 | 0.20 | 11 |
| 10 C04F6.1 | SITPLRAAELLK           | 39 | 5999  | 1.74 | 0.21 | 12 |
| 7 C04F6.1  | SITPLRAAELLK           | 13 | 1385  | 1.75 | 0.27 | 15 |
| 10 C04F6.1 | SITPLRAAELLK           | 27 | 965   | 1.75 | 0.13 | 7  |
| 1 C04F6.1  | MIREIQSEQGFK           | 23 | 635   | 1.76 | 0.15 | 9  |
| 7 C04F6.1  | MIREIQSEQGFK           | 40 | 2954  | 1.76 | 0.18 | 10 |
| 10 C04F6.1 | NTLEITHK               | 37 | 6102  | 1.76 | 0.11 | 6  |
| 7 C04F6.1  | NTLEITHK               | 17 | 1410  | 1.77 | 0.24 | 14 |
| 10 C04F6.1 | VHTTIYTK               | 48 | 31567 | 1.77 | 0.08 | 4  |
| 7 C04F6.1  | NAFLPK                 | 22 | 1275  | 1.78 | 0.05 | 3  |
| 10 C04F6.1 | NLITLK                 | 31 | 2319  | 1.78 | 0.05 | 3  |
| 10 C04F6.1 | VVRREEEIVVK            | 29 | 2011  | 1.78 | 0.06 | 3  |
| 7 C04F6.1  | MIREIQSEQGFK           | 11 | 963   | 1.79 | 0.25 | 14 |
| 10 C04F6.1 | SLLTFLTNDISK           | 47 | 1225  | 1.80 | 0.19 | 10 |
| 10 C04F6.1 | NTLEITHK               | 27 | 3813  | 1.80 | 0.08 | 4  |
| 10 C04F6.1 | MPTILSINGK             | 83 | 7187  | 1.81 | 0.08 | 5  |

|            |                 |    |       |      |      |    |
|------------|-----------------|----|-------|------|------|----|
| 22 C04F6.1 | NLITLK          | 11 | 1693  | 1.82 | 0.19 | 10 |
| 7 C04F6.1  | DSLFFNVHEK      | 10 | 3233  | 1.82 | 0.10 | 5  |
| 10 C04F6.1 | MIREIQSEQGFK    | 55 | 4863  | 1.82 | 0.21 | 12 |
| 10 C04F6.1 | VHTTIYTK        | 19 | 17979 | 1.84 | 0.05 | 3  |
| 10 C04F6.1 | VVRREEIVVK      | 22 | 6685  | 1.84 | 0.23 | 13 |
| 10 C04F6.1 | SITPLRAAELLK    | 34 | 2472  | 1.85 | 0.18 | 10 |
| 10 C04F6.1 | MIREIQSEQGFK    | 20 | 2300  | 1.86 | 0.10 | 5  |
| 10 C04F6.1 | DCSEQPRFAVLAK   | 17 | 3719  | 1.87 | 0.17 | 9  |
| 10 C04F6.1 | MIREIQSEQGFK    | 20 | 1970  | 1.87 | 0.17 | 9  |
| 10 C04F6.1 | FIRNIEREYK      | 12 | 1114  | 1.87 | 0.27 | 14 |
| 22 C04F6.1 | VHTTIYTK        | 14 | 10234 | 1.87 | 0.08 | 4  |
| 7 C04F6.1  | SITPLRAAELLK    | 15 | 1714  | 1.88 | 0.09 | 5  |
| 10 C04F6.1 | AYNFWTVSEK      | 40 | 2221  | 1.88 | 0.14 | 7  |
| 7 C04F6.1  | MIREIQSEQGFK    | 13 | 1739  | 1.88 | 0.33 | 18 |
| 10 C04F6.1 | VVRREEIVVK      | 34 | 7273  | 1.89 | 0.17 | 9  |
| 7 C04F6.1  | SITPLRAAELLK    | 25 | 1790  | 1.89 | 0.23 | 12 |
| 10 C04F6.1 | NTLEITHK        | 64 | 8207  | 1.89 | 0.08 | 4  |
| 10 C04F6.1 | VVRREEIVVK      | 20 | 8218  | 1.90 | 0.17 | 9  |
| 10 C04F6.1 | DSLFFNVHEK      | 36 | 4366  | 1.90 | 0.08 | 4  |
| 10 C04F6.1 | VVRREEIVVK      | 23 | 5772  | 1.90 | 0.09 | 5  |
| 22 C04F6.1 | EGQFVKPQTVVYTFK | 33 | 3780  | 1.90 | 0.14 | 7  |
| 10 C04F6.1 | MPTILSINGK      | 53 | 6475  | 1.90 | 0.18 | 10 |
| 7 C04F6.1  | SITPLRAAELLK    | 18 | 891   | 1.92 | 0.09 | 5  |
| 10 C04F6.1 | SLLTFLTNDISK    | 39 | 1375  | 1.92 | 0.11 | 6  |
| 1 C04F6.1  | VHTTIYTK        | 35 | 6041  | 1.92 | 0.15 | 8  |
| 10 C04F6.1 | VHTTIYTK        | 47 | 35444 | 1.92 | 0.51 | 26 |
| 7 C04F6.1  | NTLEITHK        | 58 | 2227  | 1.92 | 0.15 | 8  |
| 7 C04F6.1  | NLITLK          | 14 | 986   | 1.93 | 0.12 | 6  |
| 22 C04F6.1 | NTLEITHK        | 45 | 12021 | 1.94 | 0.14 | 7  |
| 10 C04F6.1 | LIEQFYQQGDK     | 65 | 3373  | 1.94 | 0.14 | 7  |
| 10 C04F6.1 | GIPEYELLIK      | 13 | 3464  | 1.95 | 0.33 | 17 |
| 22 C04F6.1 | VHTTIYTK        | 15 | 22974 | 1.95 | 0.06 | 3  |
| 10 C04F6.1 | MIREIQSEQGFK    | 21 | 2590  | 1.95 | 0.16 | 8  |
| 10 C04F6.1 | MIREIQSEQGFK    | 47 | 2197  | 1.96 | 0.12 | 6  |
| 7 C04F6.1  | NAFLPK          | 12 | 1484  | 1.96 | 0.13 | 7  |
| 10 C04F6.1 | AARLNQVNVVSEYK  | 14 | 3635  | 1.96 | 0.32 | 16 |
| 7 C04F6.1  | NLITLK          | 14 | 1576  | 1.97 | 0.15 | 7  |
| 10 C04F6.1 | VLLPVYK         | 11 | 4768  | 1.97 | 0.12 | 6  |
| 10 C04F6.1 | MPTILSINGK      | 24 | 5530  | 1.98 | 0.08 | 4  |
| 22 C04F6.1 | AARLNQVNVVSEYK  | 64 | 3100  | 1.99 | 0.18 | 9  |
| 10 C04F6.1 | MIREIQSEQGFK    | 36 | 5080  | 1.99 | 0.19 | 10 |
| 10 C04F6.1 | FIRNIEREYK      | 15 | 5010  | 1.99 | 0.32 | 16 |
| 10 C04F6.1 | MPTILSINGK      | 62 | 8361  | 2.00 | 0.20 | 10 |
| 1 C04F6.1  | MIREIQSEQGFK    | 19 | 760   | 2.00 | 0.15 | 8  |
| 10 C04F6.1 | MIREIQSEQGFK    | 45 | 3561  | 2.01 | 0.25 | 12 |
| 10 C04F6.1 | AARLNQVNVVSEYK  | 43 | 1252  | 2.02 | 0.15 | 7  |
| 1 C04F6.1  | VHTTIYTK        | 19 | 9321  | 2.03 | 0.71 | 35 |
| 7 C04F6.1  | NTLEITHK        | 43 | 2354  | 2.03 | 0.26 | 13 |
| 1 C04F6.1  | VHTTIYTK        | 26 | 9540  | 2.04 | 0.17 | 8  |
| 10 C04F6.1 | NLITLK          | 23 | 1101  | 2.04 | 0.06 | 3  |
| 7 C04F6.1  | SITPLRAAELLK    | 27 | 3097  | 2.05 | 0.23 | 11 |
| 22 C04F6.1 | MPTILSINGK      | 22 | 2229  | 2.05 | 0.06 | 3  |
| 7 C04F6.1  | SITPLRAAELLK    | 19 | 2492  | 2.06 | 0.17 | 8  |
| 7 C04F6.1  | SITPLRAAELLK    | 34 | 2308  | 2.08 | 0.34 | 16 |
| 10 C04F6.1 | MPTILSINGK      | 69 | 8185  | 2.09 | 0.04 | 2  |
| 1 C04F6.1  | VHTTIYTK        | 15 | 6835  | 2.10 | 0.25 | 12 |
| 1 C04F6.1  | DSLFFNVHEK      | 12 | 1940  | 2.10 | 0.24 | 11 |
| 10 C04F6.1 | MIREIQSEQGFK    | 52 | 2987  | 2.12 | 0.08 | 4  |
| 10 C04F6.1 | MIREIQSEQGFK    | 27 | 2569  | 2.16 | 0.25 | 12 |
| 10 C04F6.1 | NAFLPK          | 31 | 10628 | 2.17 | 0.14 | 6  |
| 10 C04F6.1 | MIREIQSEQGFK    | 30 | 2323  | 2.17 | 0.14 | 7  |
| 10 C04F6.1 | DSLFFNVHEK      | 24 | 2092  | 2.18 | 0.10 | 5  |
| 10 C04F6.1 | VHTTIYTK        | 22 | 18432 | 2.19 | 0.06 | 3  |
| 22 C04F6.1 | VHTTIYTK        | 25 | 10031 | 2.20 | 0.24 | 11 |
| 22 C04F6.1 | SLLTFLTNDISK    | 41 | 1585  | 2.21 | 0.16 | 7  |
| 10 C04F6.1 | MIREIQSEQGFK    | 30 | 2847  | 2.22 | 0.21 | 10 |
| 10 C04F6.1 | SLLTFLTNDISK    | 53 | 1816  | 2.23 | 0.15 | 7  |
| 10 C04F6.1 | AARLNQVNVVSEYK  | 22 | 1825  | 2.23 | 0.21 | 9  |
| 22 C04F6.1 | DSLFFNVHEK      | 25 | 2865  | 2.24 | 0.10 | 5  |
| 10 C04F6.1 | DSLFFNVHEK      | 17 | 2540  | 2.26 | 0.27 | 12 |
| 10 C04F6.1 | VHTTIYTK        | 38 | 17654 | 2.26 | 0.05 | 2  |
| 10 C04F6.1 | DSLFFNVHEK      | 23 | 3519  | 2.26 | 0.11 | 5  |
| 10 C04F6.1 | VVRREEIVVK      | 17 | 5782  | 2.29 | 0.10 | 4  |
| 10 C04F6.1 | MPTILSINGK      | 71 | 6659  | 2.30 | 0.08 | 3  |
| 10 C04F6.1 | NLITLK          | 15 | 1966  | 2.31 | 0.16 | 7  |
| 22 C04F6.1 | GIPEYELLIK      | 14 | 1520  | 2.32 | 0.45 | 19 |
| 22 C04F6.1 | MIREIQSEQGFK    | 14 | 1406  | 2.33 | 0.21 | 9  |
| 22 C04F6.1 | VHTTIYTK        | 29 | 18206 | 2.33 | 0.14 | 6  |
| 7 C04F6.1  | RSILNLFSLRK     | 16 | 4018  | 2.33 | 0.13 | 5  |
| 10 C04F6.1 | GIPEYELLIK      | 21 | 2681  | 2.35 | 0.18 | 8  |
| 7 C04F6.1  | NTLEITHK        | 52 | 3058  | 2.35 | 0.22 | 9  |
| 22 C04F6.1 | DSLFFNVHEK      | 28 | 2992  | 2.35 | 0.04 | 2  |
| 22 C04F6.1 | MPTILSINGK      | 15 | 2945  | 2.38 | 0.10 | 4  |
| 10 C04F6.1 | MPTILSINGK      | 59 | 10329 | 2.39 | 0.13 | 5  |
| 22 C04F6.1 | AARLNQVNVVSEYK  | 40 | 2682  | 2.39 | 0.20 | 8  |
| 10 C04F6.1 | VHTTIYTK        | 28 | 12710 | 2.41 | 0.11 | 5  |
| 10 C04F6.1 | DSLFFNVHEK      | 32 | 2772  | 2.41 | 0.15 | 6  |
| 10 C04F6.1 | MIREIQSEQGFK    | 27 | 1449  | 2.41 | 0.06 | 2  |
| 1 C04F6.1  | VHTTIYTK        | 23 | 5558  | 2.43 | 0.21 | 9  |
| 22 C04F6.1 | MPTILSINGK      | 24 | 3128  | 2.43 | 0.21 | 9  |
| 10 C04F6.1 | MPTILSINGK      | 21 | 2958  | 2.44 | 0.10 | 4  |
| 22 C04F6.1 | MIREIQSEQGFK    | 11 | 2633  | 2.45 | 0.12 | 5  |
| 7 C04F6.1  | VLLPVYK         | 11 | 1352  | 2.49 | 0.16 | 7  |
| 10 C04F6.1 | MPTILSINGK      | 17 | 2751  | 2.53 | 0.17 | 7  |
| 1 C04F6.1  | MPTILSINGK      | 22 | 2808  | 2.56 | 0.22 | 9  |
| 7 C04F6.1  | VHTTIYTK        | 23 | 9987  | 2.56 | 0.29 | 11 |
| 7 C04F6.1  | DSLFFNVHEK      | 19 | 1861  | 2.57 | 0.08 | 3  |
| 7 C04F6.1  | SITPLRAAELLK    | 29 | 2355  | 2.62 | 0.26 | 10 |
| 7 C04F6.1  | NLITLK          | 18 | 1237  | 2.63 | 0.20 | 7  |
| 22 C04F6.1 | VTFVEESK        | 27 | 2855  | 2.63 | 0.11 | 4  |
| 7 C04F6.1  | MIREIQSEQGFK    | 23 | 2150  | 2.66 | 0.23 | 9  |

|                      |                    |     |       |      |      |    |
|----------------------|--------------------|-----|-------|------|------|----|
| 10 C04F6.1           | MIREIQSEQGFK       | 42  | 2086  | 2.67 | 0.20 | 8  |
| 10 C04F6.1           | VHTTIYTK           | 24  | 40695 | 2.70 | 0.04 | 2  |
| 10 C04F6.1           | AARLNQVNVVSEYK     | 25  | 3127  | 2.71 | 0.25 | 9  |
| 10 C04F6.1           | DSLFFNVHEK         | 26  | 2572  | 2.73 | 0.13 | 5  |
| 22 C04F6.1           | VHTTIYTK           | 48  | 15961 | 2.73 | 0.06 | 2  |
| 22 C04F6.1           | GIPEYELLIK         | 12  | 3132  | 2.74 | 0.16 | 6  |
| 10 C04F6.1           | MPTILSINGK         | 31  | 2271  | 2.79 | 0.16 | 6  |
| 10 C04F6.1           | MIREIQSEQGFK       | 36  | 5446  | 2.79 | 0.19 | 7  |
| 10 C04F6.1           | FIRNIEREYK         | 12  | 3181  | 2.81 | 0.15 | 5  |
| 10 C04F6.1           | NTLEITHK           | 53  | 6356  | 2.87 | 0.15 | 5  |
| 10 C04F6.1           | MPTILSINGK         | 16  | 1809  | 2.88 | 0.17 | 6  |
| 22 C04F6.1           | MPTILSINGK         | 17  | 2706  | 2.95 | 0.17 | 6  |
| 10 C04F6.1           | LIEQFYQQGDK        | 31  | 1560  | 3.00 | 0.24 | 8  |
| 10 C04F6.1           | MIREIQSEQGFK       | 33  | 2817  | 3.06 | 0.08 | 3  |
| 7 C04F6.1            | DSLFFNVHEK         | 26  | 2563  | 3.07 | 0.19 | 6  |
| 10 C04F6.1           | AARLNQVNVVSEYK     | 21  | 2124  | 3.09 | 0.12 | 4  |
| 10 C04F6.1           | AARLNQVNVVSEYK     | 54  | 2591  | 3.09 | 0.16 | 5  |
| 1 C04F6.1            | VHTTIYTK           | 28  | 10936 | 3.10 | 0.10 | 3  |
| 10 C04F6.1           | DSLFFNVHEK         | 39  | 2875  | 3.10 | 0.08 | 3  |
| 1 C04F6.1            | VHTTIYTK           | 27  | 3911  | 3.13 | 0.27 | 8  |
| 7 C04F6.1            | VHTTIYTK           | 11  | 5853  | 3.26 | 0.21 | 6  |
| 10 C04F6.1           | MPTILSINGK         | 70  | 4158  | 3.29 | 0.26 | 8  |
| 22 C04F6.1           | MIREIQSEQGFK       | 22  | 1554  | 3.37 | 0.23 | 7  |
| 10 C04F6.1           | MIREIQSEQGFK       | 52  | 2929  | 3.37 | 0.18 | 5  |
| 22 C04F6.1           | AYNFWTVSEK         | 32  | 1689  | 3.38 | 0.18 | 5  |
| 10 C04F6.1           | EGQFVKPQTVVYTYFK   | 19  | 3547  | 3.43 | 0.43 | 12 |
| 10 C04F6.1           | VHTTIYTK           | 17  | 8621  | 3.44 | 0.06 | 2  |
| 10 C04F6.1           | DCSEQPRFAVLAK      | 12  | 1613  | 3.45 | 0.20 | 6  |
| 10 C04F6.1           | MIREIQSEQGFK       | 40  | 1483  | 3.50 | 0.27 | 8  |
| 10 C04F6.1           | VHTTIYTK           | 16  | 5050  | 3.56 | 0.61 | 17 |
| 22 C04F6.1           | GIPEYELLIK         | 17  | 3564  | 3.62 | 0.27 | 7  |
| 10 C04F6.1           | VHTTIYTK           | 35  | 17146 | 3.71 | 0.36 | 10 |
| 7 C04F6.1            | RSILNLSLRK         | 30  | 4734  | 3.89 | 0.17 | 4  |
| 10 C04F6.1           | AARLNQVNVVSEYK     | 51  | 1939  | 3.91 | 0.12 | 3  |
| 10 C04F6.1           | VHTTIYTK           | 21  | 8047  | 3.92 | 0.08 | 2  |
| 22 C04F6.1           | LIEQFYQQGDK        | 51  | 1809  | 4.05 | 0.16 | 4  |
| 7 C04F6.1            | VHTTIYTK           | 20  | 2831  | 4.14 | 0.19 | 5  |
| 10 C04F6.1           | VHTTIYTK           | 31  | 11721 | 4.25 | 0.15 | 4  |
| 10 C04F6.1           | MIREIQSEQGFK       | 40  | 1744  | 4.32 | 0.05 | 1  |
| 7 C04F6.1            | VHTTIYTK           | 24  | 4265  | 4.48 | 0.63 | 14 |
| 7 C04F6.1            | VHTTIYTK           | 19  | 12260 | 4.60 | 0.16 | 3  |
| 10 C04F6.1           | TMEGDCEVAYTIVQEGEK | 65  | 3071  | 4.61 | 0.30 | 7  |
| 22 C04F6.1           | LIEQFYQQGDK        | 49  | 2239  | 4.77 | 0.11 | 2  |
| 22 C04F6.1           | LIEQFYQQGDK        | 46  | 1288  | 4.82 | 0.24 | 5  |
| 10 C04F6.1           | MPTILSINGK         | 45  | 4279  | 4.92 | 0.24 | 5  |
| 10 C04F6.1           | MPTILSINGK         | 27  | 2582  | 5.01 | 0.13 | 3  |
| 7 C04F6.1            | MIREIQSEQGFK       | 12  | 953   | 5.15 | 0.23 | 5  |
| 7 C04F6.1            | VHTTIYTK           | 18  | 6817  | 5.17 | 0.09 | 2  |
| 7 C04F6.1            | VHTTIYTK           | 20  | 3567  | 5.21 | 0.13 | 3  |
| 10 C04F6.1           | VHTTIYTK           | 33  | 9856  | 5.42 | 0.06 | 1  |
| 22 C04F6.1           | LIEQFYQQGDK        | 57  | 2818  | 5.42 | 0.08 | 2  |
| 10 C04F6.1           | VHTTIYTK           | 30  | 10421 | 6.08 | 0.33 | 5  |
| 22 C04F6.1           | MIREIQSEQGFK       | 28  | 2463  | 6.27 | 0.22 | 4  |
| 10 C04F6.1           | MPTILSINGK         | 36  | 6199  | 6.82 | 0.28 | 4  |
| 10 C04F6.1           | MPTILSINGK         | 18  | 2325  | 6.91 | 0.19 | 3  |
| 22 C04F6.1           | LIEQFYQQGDK        | 59  | 1590  | 7.03 | 0.29 | 4  |
| 7 C04F6.4a;C04F6.4b  | GDLFTVSWDDHLK      | 12  | 1041  | 0.61 | 0.11 | 17 |
| 22 C04F6.4a;C04F6.4b | IWNVATLK           | 31  | 1440  | 1.03 | 0.15 | 14 |
| 1 C04F6.4a;C04F6.4b  | HIAIYSHGK          | 25  | 4099  | 1.89 | 0.33 | 17 |
| 22 C04F6.4a;C04F6.4b | HIAIYSHGK          | 26  | 2811  | 2.40 | 0.15 | 6  |
| 10 C05C10.3          | VFNSAEAAVK         | 36  | 3929  | 0.59 | 0.16 | 28 |
| 1 C05C10.3           | NGLTLIEVRK         | 25  | 1409  | 0.59 | 0.15 | 25 |
| 1 C05C10.3           | VFNSAEAAVK         | 28  | 2730  | 1.04 | 0.12 | 12 |
| 22 C05C10.3          | NGLTLIEVRK         | 32  | 2446  | 1.04 | 0.10 | 9  |
| 7 C05C10.3           | VFNSAEAAVK         | 17  | 3085  | 1.09 | 0.31 | 28 |
| 22 C05C10.3          | VFNSAEAAVK         | 29  | 4363  | 1.09 | 0.12 | 11 |
| 10 C05C10.3          | NGLTLIEVRK         | 37  | 2436  | 1.14 | 0.15 | 13 |
| 22 C05C10.3          | VFNSAEAAVK         | 20  | 2524  | 1.35 | 0.07 | 5  |
| 10 C05C8.3           | SESGDQLEQFYK       | 17  | 2024  | 0.58 | 0.11 | 19 |
| 10 C05C8.3           | SESGDQLEQFYK       | 28  | 1818  | 0.60 | 0.16 | 27 |
| 22 C05C8.3           | SESGDQLEQFYK       | 44  | 2283  | 0.60 | 0.23 | 39 |
| 22 C05C8.3           | SESGDQLEQFYK       | 43  | 2182  | 0.78 | 0.20 | 25 |
| 10 C05C8.4           | KPNPAPSGVTATPPK    | 12  | 5481  | 3.09 | 0.19 | 6  |
| 22 C05D11.11a        | YTNNENILVDHVEK     | 87  | 5179  | 0.29 | 0.13 | 45 |
| 22 C05D11.11a        | VSATSEFFQSLPYK     | 61  | 1132  | 0.36 | 0.26 | 71 |
| 22 C05D11.11a        | VGDFIHEGVQIAK      | 68  | 8727  | 0.36 | 0.10 | 29 |
| 22 C05D11.11a        | VGDFIHEGVQIAK      | 46  | 6563  | 0.38 | 0.17 | 46 |
| 22 C05D11.11a        | RALEVFLDPAK        | 27  | 4436  | 0.40 | 0.22 | 56 |
| 22 C05D11.11a        | VGDFIHEGVQIAK      | 49  | 4699  | 0.41 | 0.24 | 59 |
| 22 C05D11.11a        | VSATSEFFQSLPYK     | 45  | 1105  | 0.42 | 0.13 | 30 |
| 22 C05D11.11a        | VSATSEFFQSLPYK     | 42  | 1441  | 0.42 | 0.13 | 31 |
| 22 C05D11.11a        | VGDFIHEGVQIAK      | 50  | 8758  | 0.43 | 0.13 | 30 |
| 22 C05D11.11a        | VSATSEFFQSLPYK     | 44  | 948   | 0.44 | 0.12 | 27 |
| 22 C05D11.11a        | VSATSEFFQSLPYK     | 31  | 1755  | 0.49 | 0.24 | 49 |
| 22 C05D11.11a        | RALEVFLDPAK        | 21  | 4769  | 0.49 | 0.32 | 64 |
| 22 C05D11.11a        | RQRRGLELIASENFTSK  | 23  | 7280  | 0.58 | 0.12 | 21 |
| 22 C05D11.11a        | VSATSEFFQSLPYK     | 19  | 825   | 0.64 | 0.19 | 30 |
| 22 C05D11.11a        | RQRRGLELIASENFTSK  | 17  | 9080  | 0.70 | 0.17 | 24 |
| 22 C05D11.11a        | YTNNENILVDHVEK     | 77  | 4624  | 0.76 | 0.16 | 22 |
| 22 C05D11.11a        | RQRRGLELIASENFTSK  | 17  | 8340  | 0.76 | 0.19 | 25 |
| 22 C05D11.11a        | VGDFIHEGVQIAK      | 64  | 10895 | 0.78 | 0.09 | 12 |
| 22 C05D11.11a        | RQRRGLELIASENFTSK  | 14  | 3480  | 0.79 | 0.22 | 27 |
| 22 C05D11.11a        | VGDFIHEGVQIAK      | 47  | 3013  | 0.82 | 0.12 | 15 |
| 22 C05D11.11a        | YTNNENILVDHVEK     | 118 | 6030  | 0.85 | 0.17 | 20 |
| 22 C05D11.11a        | VGDFIHEGVQIAK      | 49  | 6930  | 0.86 | 0.09 | 11 |
| 22 C05D11.11a        | GVDTLYDLEEK        | 27  | 701   | 0.89 | 0.17 | 19 |
| 22 C05D11.11a        | VSATSEFFQSLPYK     | 17  | 647   | 0.96 | 0.19 | 20 |
| 22 C05D11.11a        | VSATSEFFQSLPYK     | 18  | 705   | 0.99 | 0.08 | 8  |
| 22 C05D11.11a        | VDPEVFDIMK         | 21  | 1594  | 1.01 | 0.29 | 28 |
| 22 C05D11.11a        | VSATSEFFQSLPYK     | 24  | 605   | 1.04 | 0.16 | 15 |
| 22 C05D11.11a        | RVEEFSTK           | 42  | 10361 | 1.20 | 0.17 | 14 |

|                          |                   |     |       |      |      |     |
|--------------------------|-------------------|-----|-------|------|------|-----|
| 22 C05D11.11a            | RVEEFSTK          | 45  | 4756  | 1.22 | 0.13 | 11  |
| 22 C05D11.11a            | VGDFIHEGVQIAK     | 59  | 8974  | 1.22 | 0.14 | 11  |
| 22 C05D11.11a            | YTNNENILVDHVEK    | 90  | 5790  | 1.24 | 0.14 | 12  |
| 22 C05D11.11a            | RVEEFSTK          | 48  | 6404  | 1.25 | 0.17 | 14  |
| 22 C05D11.11a            | RVEEFSTK          | 35  | 11208 | 1.27 | 0.18 | 14  |
| 22 C05D11.11a            | VSATSEFFQSLPYK    | 26  | 687   | 1.34 | 0.08 | 6   |
| 22 C05D11.11a            | RVEEFSTK          | 19  | 2618  | 1.37 | 0.20 | 14  |
| 22 C05D11.11a            | VGDFIHEGVQIAK     | 63  | 6624  | 1.50 | 0.17 | 11  |
| 22 C05D11.11a            | VSATSEFFQSLPYK    | 37  | 698   | 1.50 | 0.09 | 6   |
| 22 C05D11.11a            | YTNNENILVDHVEK    | 82  | 4990  | 1.53 | 0.14 | 9   |
| 22 C05D11.11a            | RQRRGLELIASENFTSK | 11  | 4518  | 1.65 | 0.08 | 5   |
| 10 C05D11.11a;C05D11.11b | RVEEFSTK          | 50  | 18089 | 0.12 | 0.37 | 299 |
| 10 C05D11.11a;C05D11.11b | YTNNENILVDHVEK    | 101 | 5913  | 0.22 | 0.11 | 50  |
| 10 C05D11.11a;C05D11.11b | YTNNENILVDHVEK    | 88  | 8852  | 0.23 | 0.15 | 68  |
| 10 C05D11.11a;C05D11.11b | YTNNENILVDHVEK    | 79  | 6935  | 0.24 | 0.11 | 45  |
| 10 C05D11.11a;C05D11.11b | VGDFIHEGVQIAK     | 50  | 6829  | 0.31 | 0.18 | 59  |
| 10 C05D11.11a;C05D11.11b | VGDFIHEGVQIAK     | 59  | 6016  | 0.31 | 0.21 | 68  |
| 7 C05D11.11a;C05D11.11b  | RVEEFSTK          | 40  | 4807  | 0.33 | 0.16 | 49  |
| 10 C05D11.11a;C05D11.11b | VSATSEFFQSLPYK    | 15  | 731   | 0.36 | 0.09 | 26  |
| 10 C05D11.11a;C05D11.11b | RALEVFGLDPAK      | 14  | 12391 | 0.36 | 0.21 | 58  |
| 7 C05D11.11a;C05D11.11b  | VSATSEFFQSLPYK    | 64  | 1698  | 0.37 | 0.18 | 48  |
| 7 C05D11.11a;C05D11.11b  | RVEEFSTK          | 47  | 4375  | 0.37 | 0.18 | 49  |
| 10 C05D11.11a;C05D11.11b | VSATSEFFQSLPYK    | 44  | 1387  | 0.38 | 0.07 | 19  |
| 1 C05D11.11a;C05D11.11b  | VGDFIHEGVQIAK     | 35  | 796   | 0.38 | 0.09 | 24  |
| 7 C05D11.11a;C05D11.11b  | YTNNENILVDHVEK    | 118 | 4242  | 0.42 | 0.16 | 37  |
| 7 C05D11.11a;C05D11.11b  | VGDFIHEGVQIAK     | 28  | 2403  | 0.46 | 0.17 | 38  |
| 7 C05D11.11a;C05D11.11b  | VGDFIHEGVQIAK     | 44  | 3753  | 0.46 | 0.13 | 29  |
| 7 C05D11.11a;C05D11.11b  | VSATSEFFQSLPYK    | 40  | 1464  | 0.47 | 0.14 | 29  |
| 1 C05D11.11a;C05D11.11b  | VGDFIHEGVQIAK     | 51  | 2183  | 0.49 | 0.13 | 27  |
| 7 C05D11.11a;C05D11.11b  | YTNNENILVDHVEK    | 86  | 5436  | 0.50 | 0.16 | 33  |
| 7 C05D11.11a;C05D11.11b  | VGDFIHEGVQIAK     | 65  | 4942  | 0.53 | 0.16 | 31  |
| 7 C05D11.11a;C05D11.11b  | VGDFIHEGVQIAK     | 41  | 6140  | 0.54 | 0.18 | 33  |
| 1 C05D11.11a;C05D11.11b  | RVEEFSTK          | 44  | 3973  | 0.55 | 0.22 | 40  |
| 7 C05D11.11a;C05D11.11b  | RALEVFGLDPAK      | 26  | 4715  | 0.56 | 0.34 | 61  |
| 1 C05D11.11a;C05D11.11b  | VDPEVFDIMK        | 35  | 1990  | 0.58 | 0.09 | 16  |
| 7 C05D11.11a;C05D11.11b  | VGDFIHEGVQIAK     | 54  | 3314  | 0.59 | 0.10 | 17  |
| 10 C05D11.11a;C05D11.11b | RALEVFGLDPAK      | 12  | 6517  | 0.60 | 0.09 | 16  |
| 7 C05D11.11a;C05D11.11b  | VGDFIHEGVQIAK     | 58  | 4595  | 0.60 | 0.16 | 26  |
| 7 C05D11.11a;C05D11.11b  | VGDFIHEGVQIAK     | 66  | 4633  | 0.60 | 0.18 | 29  |
| 7 C05D11.11a;C05D11.11b  | VSATSEFFQSLPYK    | 33  | 1176  | 0.61 | 0.08 | 13  |
| 10 C05D11.11a;C05D11.11b | VGDFIHEGVQIAK     | 45  | 3121  | 0.62 | 0.31 | 50  |
| 7 C05D11.11a;C05D11.11b  | YTNNENILVDHVEK    | 83  | 7331  | 0.62 | 0.10 | 16  |
| 1 C05D11.11a;C05D11.11b  | RALEVFGLDPAK      | 26  | 5522  | 0.62 | 0.22 | 35  |
| 7 C05D11.11a;C05D11.11b  | VGDFIHEGVQIAK     | 52  | 6534  | 0.62 | 0.14 | 22  |
| 7 C05D11.11a;C05D11.11b  | YTNNENILVDHVEK    | 72  | 4488  | 0.64 | 0.20 | 31  |
| 1 C05D11.11a;C05D11.11b  | YTNNENILVDHVEK    | 86  | 8141  | 0.65 | 0.07 | 11  |
| 10 C05D11.11a;C05D11.11b | VSATSEFFQSLPYK    | 63  | 1430  | 0.65 | 0.18 | 27  |
| 1 C05D11.11a;C05D11.11b  | GVDTLYDLEEK       | 48  | 860   | 0.66 | 0.11 | 17  |
| 1 C05D11.11a;C05D11.11b  | VSATSEFFQSLPYK    | 10  | 483   | 0.67 | 0.26 | 39  |
| 10 C05D11.11a;C05D11.11b | RALEVFGLDPAK      | 11  | 12690 | 0.68 | 0.48 | 70  |
| 10 C05D11.11a;C05D11.11b | YTNNENILVDHVEK    | 115 | 9165  | 0.69 | 0.10 | 14  |
| 10 C05D11.11a;C05D11.11b | RALEVFGLDPAK      | 17  | 3639  | 0.70 | 0.13 | 19  |
| 10 C05D11.11a;C05D11.11b | VGDFIHEGVQIAK     | 44  | 3126  | 0.71 | 0.32 | 44  |
| 1 C05D11.11a;C05D11.11b  | RVEEFSTK          | 42  | 3568  | 0.73 | 0.18 | 24  |
| 1 C05D11.11a;C05D11.11b  | YTNNENILVDHVEK    | 93  | 6340  | 0.75 | 0.13 | 18  |
| 10 C05D11.11a;C05D11.11b | VGDFIHEGVQIAK     | 41  | 2448  | 0.75 | 0.24 | 32  |
| 7 C05D11.11a;C05D11.11b  | VGDFIHEGVQIAK     | 49  | 4578  | 0.76 | 0.17 | 23  |
| 7 C05D11.11a;C05D11.11b  | GVDTLYDLEEK       | 19  | 893   | 0.77 | 0.10 | 13  |
| 7 C05D11.11a;C05D11.11b  | GVDTLYDLEEK       | 27  | 1026  | 0.78 | 0.17 | 22  |
| 7 C05D11.11a;C05D11.11b  | VGDFIHEGVQIAK     | 69  | 4764  | 0.78 | 0.14 | 18  |
| 10 C05D11.11a;C05D11.11b | VGDFIHEGVQIAK     | 52  | 7355  | 0.81 | 0.12 | 15  |
| 1 C05D11.11a;C05D11.11b  | VDPEVFDIMK        | 36  | 1821  | 0.81 | 0.20 | 25  |
| 1 C05D11.11a;C05D11.11b  | VGDFIHEGVQIAK     | 36  | 1512  | 0.81 | 0.25 | 31  |
| 1 C05D11.11a;C05D11.11b  | RALEVFGLDPAK      | 15  | 4043  | 0.83 | 0.21 | 26  |
| 10 C05D11.11a;C05D11.11b | YTNNENILVDHVEK    | 80  | 8966  | 0.84 | 0.11 | 13  |
| 1 C05D11.11a;C05D11.11b  | VGDFIHEGVQIAK     | 56  | 1626  | 0.84 | 0.09 | 11  |
| 10 C05D11.11a;C05D11.11b | VGDFIHEGVQIAK     | 47  | 5011  | 0.84 | 0.13 | 15  |
| 7 C05D11.11a;C05D11.11b  | VGDFIHEGVQIAK     | 31  | 3009  | 0.85 | 0.19 | 22  |
| 10 C05D11.11a;C05D11.11b | GVDTLYDLEEK       | 16  | 735   | 0.85 | 0.15 | 18  |
| 10 C05D11.11a;C05D11.11b | VGDFIHEGVQIAK     | 31  | 2423  | 0.86 | 0.14 | 16  |
| 1 C05D11.11a;C05D11.11b  | GVDTLYDLEEK       | 52  | 1456  | 0.86 | 0.11 | 13  |
| 7 C05D11.11a;C05D11.11b  | VGDFIHEGVQIAK     | 28  | 4083  | 0.87 | 0.11 | 13  |
| 1 C05D11.11a;C05D11.11b  | GVDTLYDLEEK       | 67  | 3834  | 0.88 | 0.11 | 13  |
| 10 C05D11.11a;C05D11.11b | VSATSEFFQSLPYK    | 22  | 2525  | 0.89 | 0.12 | 13  |
| 1 C05D11.11a;C05D11.11b  | GVDTLYDLEEK       | 44  | 1015  | 0.91 | 0.15 | 16  |
| 7 C05D11.11a;C05D11.11b  | RVEEFSTK          | 31  | 2191  | 0.93 | 0.12 | 13  |
| 10 C05D11.11a;C05D11.11b | VSATSEFFQSLPYK    | 28  | 1237  | 0.93 | 0.12 | 13  |
| 1 C05D11.11a;C05D11.11b  | VGDFIHEGVQIAK     | 17  | 979   | 0.94 | 0.12 | 13  |
| 10 C05D11.11a;C05D11.11b | VGDFIHEGVQIAK     | 57  | 8891  | 0.94 | 0.10 | 10  |
| 1 C05D11.11a;C05D11.11b  | VDPEVFDIMK        | 17  | 2098  | 0.95 | 0.15 | 16  |
| 7 C05D11.11a;C05D11.11b  | RVEEFSTK          | 19  | 3362  | 0.95 | 0.08 | 9   |
| 10 C05D11.11a;C05D11.11b | VGDFIHEGVQIAK     | 50  | 5355  | 0.96 | 0.12 | 13  |
| 1 C05D11.11a;C05D11.11b  | VGDFIHEGVQIAK     | 45  | 1604  | 0.98 | 0.17 | 17  |
| 1 C05D11.11a;C05D11.11b  | VDPEVFDIMK        | 21  | 1748  | 0.99 | 0.16 | 17  |
| 10 C05D11.11a;C05D11.11b | GVDTLYDLEEK       | 27  | 1746  | 0.99 | 0.13 | 14  |
| 1 C05D11.11a;C05D11.11b  | GVDTLYDLEEK       | 62  | 1955  | 1.00 | 0.15 | 15  |
| 1 C05D11.11a;C05D11.11b  | VDPEVFDIMK        | 12  | 798   | 1.02 | 0.35 | 34  |
| 1 C05D11.11a;C05D11.11b  | YTNNENILVDHVEK    | 94  | 4571  | 1.04 | 0.12 | 12  |
| 7 C05D11.11a;C05D11.11b  | VGDFIHEGVQIAK     | 23  | 2716  | 1.07 | 0.16 | 15  |
| 1 C05D11.11a;C05D11.11b  | GVDTLYDLEEK       | 53  | 1083  | 1.07 | 0.13 | 13  |
| 1 C05D11.11a;C05D11.11b  | GVDTLYDLEEK       | 69  | 4033  | 1.18 | 0.13 | 11  |
| 10 C05D11.11a;C05D11.11b | SLRGPRGALIFYRK    | 10  | 2792  | 1.18 | 0.24 | 20  |
| 10 C05D11.11a;C05D11.11b | GVDTLYDLEEK       | 18  | 1148  | 1.19 | 0.09 | 7   |
| 1 C05D11.11a;C05D11.11b  | VGDFIHEGVQIAK     | 29  | 1713  | 1.22 | 0.11 | 9   |
| 1 C05D11.11a;C05D11.11b  | YTNNENILVDHVEK    | 84  | 5444  | 1.25 | 0.20 | 16  |
| 10 C05D11.11a;C05D11.11b | RVEEFSTK          | 39  | 8273  | 1.25 | 0.16 | 13  |
| 1 C05D11.11a;C05D11.11b  | GVDTLYDLEEK       | 24  | 807   | 1.25 | 0.13 | 11  |
| 1 C05D11.11a;C05D11.11b  | RQRRGLELIASENFTSK | 14  | 5785  | 1.29 | 0.16 | 13  |
| 1 C05D11.11a;C05D11.11b  | VSATSEFFQSLPYK    | 12  | 842   | 1.31 | 0.12 | 9   |
| 1 C05D11.11a;C05D11.11b  | GVDTLYDLEEK       | 40  | 1222  | 1.32 | 0.08 | 6   |
| 10 C05D11.11a;C05D11.11b | RVEEFSTK          | 28  | 6967  | 1.35 | 0.21 | 15  |

|    |                       |                         |     |       |       |      |    |
|----|-----------------------|-------------------------|-----|-------|-------|------|----|
| 10 | C05D11.11a;C05D11.11b | RQRRGLELIASENFTSK       | 15  | 9604  | 1.36  | 0.14 | 10 |
| 10 | C05D11.11a;C05D11.11b | RQRRGLELIASENFTSK       | 16  | 13623 | 1.39  | 0.08 | 6  |
| 10 | C05D11.11a;C05D11.11b | VSATSEFFQSLPYK          | 11  | 1260  | 1.46  | 0.30 | 20 |
| 1  | C05D11.11a;C05D11.11b | GVDTLYDLEEK             | 63  | 1462  | 1.49  | 0.12 | 8  |
| 7  | C05D11.11a;C05D11.11b | VGDFIHEGVQIAK           | 19  | 5170  | 1.50  | 0.10 | 6  |
| 1  | C05D11.11a;C05D11.11b | VGDFIHEGVQIAK           | 33  | 1994  | 1.52  | 0.14 | 9  |
| 7  | C05D11.11a;C05D11.11b | VGDFIHEGVQIAK           | 23  | 6546  | 1.53  | 0.09 | 6  |
| 1  | C05D11.11a;C05D11.11b | RALEVFGLDPAK            | 17  | 3186  | 1.54  | 0.21 | 14 |
| 1  | C05D11.11a;C05D11.11b | RALEVFGLDPAK            | 18  | 4428  | 1.59  | 0.15 | 10 |
| 1  | C05D11.11a;C05D11.11b | VGDFIHEGVQIAK           | 45  | 2376  | 1.93  | 0.04 | 2  |
| 1  | C05D11.11a;C05D11.11b | RALEVFGLDPAK            | 17  | 2087  | 2.01  | 0.12 | 6  |
| 10 | C05D11.11a;C05D11.11b | RALEVFGLDPAK            | 19  | 2898  | 2.14  | 0.47 | 22 |
| 1  | C05D11.11a;C05D11.11b | VGDFIHEGVQIAK           | 21  | 1943  | 2.28  | 0.12 | 5  |
| 7  | C05D11.11a;C05D11.11b | YTNNENILVDHVEK          | 51  | 2245  | 2.52  | 0.14 | 6  |
| 10 | C05D11.11a;C05D11.11b | VSATSEFFQSLPYK          | 38  | 991   | 4.64  | 0.39 | 8  |
| 10 | C05D11.11a;C05D11.11b | RVEEFSTK                | 15  | 2174  | 4.92  | 0.33 | 7  |
| 10 | C05D11.11a;C05D11.11b | RVEEFSTK                | 20  | 2832  | 5.20  | 0.18 | 3  |
| 10 | C05D11.11a;C05D11.11b | YTNNENILVDHVEK          | 92  | 5715  | 5.95  | 0.46 | 8  |
| 10 | C05D11.11a;C05D11.11b | RALEVFGLDPAK            | 11  | 3655  | 8.12  | 0.39 | 5  |
| 10 | C05D11.11a;C05D11.11b | YTNNENILVDHVEK          | 89  | 6176  | 10.24 | 0.18 | 2  |
| 10 | C05D11.11a;C05D11.11b | VGDFIHEGVQIAK           | 35  | 3520  | 10.24 | 0.21 | 2  |
| 10 | C05D11.11a;C05D11.11b | RALEVFGLDPAK            | 29  | 9122  | 12.19 | 0.63 | 5  |
| 7  | C05E4.9a;C05E4.9b     | RDYTVEDVLK              | 48  | 2271  | 0.33  | 0.08 | 25 |
| 7  | C05E4.9a;C05E4.9b     | EREATDGHGDTWVAHPGLVPLAK | 15  | 6994  | 0.34  | 0.22 | 63 |
| 22 | C05E4.9a;C05E4.9b     | RDYTVEDVLK              | 27  | 2288  | 0.41  | 0.16 | 39 |
| 7  | C05E4.9a;C05E4.9b     | RDYTVEDVLK              | 26  | 1649  | 0.43  | 0.11 | 25 |
| 7  | C05E4.9a;C05E4.9b     | RDYTVEDVLK              | 23  | 1528  | 0.48  | 0.14 | 29 |
| 22 | C05E4.9a;C05E4.9b     | ALIAQSGGPYFYLPK         | 47  | 563   | 0.58  | 0.08 | 14 |
| 7  | C05E4.9a;C05E4.9b     | RDYTVEDVLK              | 25  | 1749  | 0.61  | 0.07 | 11 |
| 10 | C05E4.9a;C05E4.9b     | LEDGRTIDAGLVK           | 21  | 5274  | 0.62  | 0.08 | 12 |
| 7  | C05E4.9a;C05E4.9b     | RDYTVEDVLK              | 20  | 2042  | 0.62  | 0.34 | 55 |
| 7  | C05E4.9a;C05E4.9b     | RDYTVEDVLK              | 12  | 1767  | 0.63  | 0.07 | 10 |
| 7  | C05E4.9a;C05E4.9b     | RDYTVEDVLK              | 38  | 1378  | 0.67  | 0.19 | 29 |
| 22 | C05E4.9a;C05E4.9b     | RDYTVEDVLK              | 54  | 10300 | 0.71  | 0.12 | 18 |
| 22 | C05E4.9a;C05E4.9b     | ALIAQSGGPYFYLPK         | 19  | 1298  | 0.73  | 0.15 | 20 |
| 10 | C05E4.9a;C05E4.9b     | RDYTVEDVLK              | 39  | 2814  | 0.76  | 0.09 | 12 |
| 22 | C05E4.9a;C05E4.9b     | ALIAQSGGPYFYLPK         | 34  | 689   | 0.82  | 0.13 | 15 |
| 10 | C05E4.9a;C05E4.9b     | ALIAQSGGPYFYLPK         | 54  | 906   | 0.83  | 0.19 | 23 |
| 22 | C05E4.9a;C05E4.9b     | RDYTVEDVLK              | 36  | 9083  | 0.86  | 0.09 | 10 |
| 7  | C05E4.9a;C05E4.9b     | AFALVRADK               | 20  | 2550  | 0.92  | 0.21 | 23 |
| 22 | C05E4.9a;C05E4.9b     | LEDGRTIDAGLVK           | 11  | 3331  | 0.93  | 0.09 | 10 |
| 22 | C05E4.9a;C05E4.9b     | ELGAMGFK                | 20  | 1379  | 1.12  | 0.33 | 30 |
| 22 | C05E4.9a;C05E4.9b     | NFYQVVK                 | 14  | 803   | 1.25  | 0.19 | 16 |
| 22 | C05E4.9a;C05E4.9b     | ALIAQSGGPYFYLPK         | 63  | 942   | 1.27  | 0.15 | 12 |
| 10 | C05E4.9a;C05E4.9b     | ALIAQSGGPYFYLPK         | 70  | 934   | 1.31  | 0.18 | 14 |
| 1  | C05E4.9a;C05E4.9b     | NFYQVVK                 | 13  | 513   | 1.38  | 0.17 | 13 |
| 22 | C05E4.9a;C05E4.9b     | AFALVRADK               | 12  | 6637  | 1.50  | 0.22 | 15 |
| 22 | C05E4.9a;C05E4.9b     | HLSPSQMEK               | 30  | 18827 | 1.59  | 0.07 | 4  |
| 22 | C05E4.9a;C05E4.9b     | HLSPSQMEK               | 37  | 19636 | 1.80  | 0.11 | 6  |
| 22 | C05E4.9a;C05E4.9b     | HLSPSQMEK               | 31  | 13648 | 1.92  | 0.09 | 5  |
| 22 | C05E4.9a;C05E4.9b     | HLSPSQMEK               | 29  | 13577 | 1.98  | 0.11 | 6  |
| 22 | C05E4.9a;C05E4.9b     | ALIAQSGGPYFYLPK         | 67  | 895   | 2.26  | 0.12 | 5  |
| 22 | C05E4.9a;C05E4.9b     | ALIAQSGGPYFYLPK         | 31  | 439   | 2.38  | 0.20 | 9  |
| 22 | C05E4.9a;C05E4.9b     | GMLAYSGLQEGEFAAEK       | 147 | 3672  | 2.50  | 0.12 | 5  |
| 10 | C05G5.4               | INALREAGVVVTDSPAK       | 57  | 3182  | 0.38  | 0.22 | 57 |
| 10 | C05G5.4               | AGTEHLGLPVFK            | 11  | 4259  | 0.45  | 0.14 | 32 |
| 22 | C05G5.4               | VIVQGFTGK               | 53  | 5965  | 0.46  | 0.13 | 29 |
| 10 | C05G5.4               | INALREAGVVVTDSPAK       | 16  | 7149  | 0.53  | 0.18 | 34 |
| 10 | C05G5.4               | INALREAGVVVTDSPAK       | 41  | 3229  | 0.54  | 0.20 | 38 |
| 22 | C05G5.4               | VIVQGFTGK               | 59  | 6982  | 0.56  | 0.15 | 27 |
| 22 | C05G5.4               | AGTEHLGLPVFK            | 46  | 9596  | 0.57  | 0.17 | 30 |
| 22 | C05G5.4               | AGTEHLGLPVFK            | 44  | 2893  | 0.58  | 0.11 | 19 |
| 22 | C05G5.4               | INALREAGVVVTDSPAK       | 54  | 4236  | 0.59  | 0.23 | 40 |
| 10 | C05G5.4               | AGTEHLGLPVFK            | 11  | 3682  | 0.61  | 0.10 | 16 |
| 22 | C05G5.4               | INALREAGVVVTDSPAK       | 23  | 3013  | 0.63  | 0.22 | 35 |
| 22 | C05G5.4               | INALREAGVVVTDSPAK       | 26  | 4856  | 0.67  | 0.15 | 23 |
| 10 | C05G5.4               | INALREAGVVVTDSPAK       | 18  | 9133  | 0.67  | 0.07 | 10 |
| 22 | C05G5.4               | AGTEHLGLPVFK            | 34  | 2724  | 0.68  | 0.27 | 41 |
| 7  | C05G5.4               | AGTEHLGLPVFK            | 26  | 2828  | 0.68  | 0.09 | 13 |
| 10 | C05G5.4               | VIVQGFTGK               | 46  | 2614  | 0.74  | 0.16 | 22 |
| 7  | C05G5.4               | AGTEHLGLPVFK            | 27  | 3064  | 0.75  | 0.17 | 23 |
| 7  | C05G5.4               | INALREAGVVVTDSPAK       | 16  | 3440  | 0.77  | 0.18 | 24 |
| 1  | C05G5.4               | AGTEHLGLPVFK            | 16  | 2176  | 0.77  | 0.26 | 34 |
| 7  | C05G5.4               | AGTEHLGLPVFK            | 12  | 7504  | 0.78  | 0.23 | 30 |
| 7  | C05G5.4               | AGTEHLGLPVFK            | 25  | 3731  | 0.79  | 0.12 | 15 |
| 22 | C05G5.4               | VGGGVNANK               | 22  | 5443  | 0.79  | 0.21 | 26 |
| 1  | C05G5.4               | AGTEHLGLPVFK            | 15  | 1742  | 0.79  | 0.20 | 26 |
| 7  | C05G5.4               | AGTEHLGLPVFK            | 44  | 11666 | 0.82  | 0.08 | 10 |
| 7  | C05G5.4               | AGTEHLGLPVFK            | 25  | 2585  | 0.85  | 0.24 | 28 |
| 1  | C05G5.4               | INALREAGVVVTDSPAK       | 12  | 615   | 0.87  | 0.19 | 21 |
| 22 | C05G5.4               | VGGGVNANK               | 20  | 4775  | 0.90  | 0.22 | 25 |
| 10 | C05G5.4               | VIVQGFTGK               | 40  | 3138  | 0.94  | 0.11 | 11 |
| 10 | C05G5.4               | VIVQGFTGK               | 36  | 2284  | 0.98  | 0.17 | 18 |
| 10 | C05G5.4               | INALREAGVVVTDSPAK       | 16  | 857   | 1.02  | 0.11 | 11 |
| 22 | C05G5.4               | AGTEHLGLPVFK            | 52  | 7537  | 1.06  | 0.10 | 9  |
| 22 | C05G5.4               | AGTEHLGLPVFK            | 44  | 6154  | 1.13  | 0.08 | 7  |
| 10 | C05G5.4               | INALREAGVVVTDSPAK       | 41  | 2368  | 1.17  | 0.11 | 9  |
| 10 | C05G5.4               | VIVQGFTGK               | 33  | 1528  | 1.23  | 0.14 | 12 |
| 1  | C05G5.4               | AGTEHLGLPVFK            | 37  | 3026  | 1.23  | 0.08 | 7  |
| 10 | C05G5.4               | AGTEHLGLPVFK            | 44  | 5217  | 1.24  | 0.14 | 12 |
| 22 | C05G5.4               | VIVQGFTGK               | 45  | 1780  | 1.27  | 0.17 | 13 |
| 10 | C05G5.4               | INALREAGVVVTDSPAK       | 12  | 4116  | 1.30  | 0.13 | 10 |
| 7  | C05G5.4               | INALREAGVVVTDSPAK       | 41  | 2820  | 1.30  | 0.13 | 10 |
| 10 | C05G5.4               | AGTEHLGLPVFK            | 52  | 9926  | 1.31  | 0.10 | 8  |
| 7  | C05G5.4               | INALREAGVVVTDSPAK       | 34  | 3452  | 1.32  | 0.24 | 18 |
| 1  | C05G5.4               | INALREAGVVVTDSPAK       | 13  | 1329  | 1.33  | 0.16 | 12 |
| 1  | C05G5.4               | AGTEHLGLPVFK            | 35  | 2400  | 1.40  | 0.11 | 8  |
| 22 | C05G5.4               | VIVQGFTGK               | 53  | 2732  | 1.43  | 0.08 | 6  |
| 1  | C05G5.4               | INALREAGVVVTDSPAK       | 35  | 2202  | 1.56  | 0.16 | 10 |
| 1  | C05G5.4               | INALREAGVVVTDSPAK       | 15  | 1347  | 1.71  | 0.22 | 13 |
| 7  | C05G5.4               | VIVQGFTGK               | 48  | 4144  | 1.81  | 0.09 | 5  |

|            |                      |     |       |      |      |     |
|------------|----------------------|-----|-------|------|------|-----|
| 7 C05G5.4  | VIVQGFTGK            | 33  | 3874  | 2.07 | 0.19 | 9   |
| 7 C05G5.4  | INALREAGVVVTDSPAK    | 11  | 2832  | 2.22 | 0.12 | 6   |
| 10 C05G5.4 | INALREAGVVVTDSPAK    | 46  | 2355  | 2.63 | 0.20 | 8   |
| 22 C05G5.4 | INALREAGVVVTDSPAK    | 39  | 4760  | 2.65 | 0.10 | 4   |
| 10 C05G5.4 | VIVQGFTGK            | 54  | 3424  | 2.89 | 0.19 | 7   |
| 22 C05G5.4 | VIVQGFTGK            | 46  | 1260  | 2.98 | 0.11 | 4   |
| 22 C05G5.4 | INALREAGVVVTDSPAK    | 25  | 3629  | 3.01 | 0.10 | 3   |
| 22 C05G5.4 | VIVQGFTGK            | 55  | 2177  | 3.30 | 0.09 | 3   |
| 10 C05G5.4 | VIVQGFTGK            | 51  | 3130  | 3.40 | 0.16 | 5   |
| 10 C05G5.4 | INALREAGVVVTDSPAK    | 29  | 5110  | 4.00 | 0.14 | 3   |
| 10 C05G5.4 | INALREAGVVVTDSPAK    | 29  | 6589  | 4.43 | 0.12 | 3   |
| 22 C06A1.1 | RELQELVQYPVEHPEK     | 50  | 10624 | 0.05 | 0.16 | 339 |
| 22 C06A1.1 | MSGESESNLRK          | 41  | 2189  | 0.19 | 0.30 | 160 |
| 22 C06A1.1 | LAIRESIEK            | 18  | 2290  | 0.22 | 0.42 | 193 |
| 1 C06A1.1  | LAIRESIEK            | 19  | 1774  | 0.26 | 0.16 | 61  |
| 1 C06A1.1  | LAIRESIEK            | 15  | 1643  | 0.26 | 0.11 | 41  |
| 10 C06A1.1 | EMVELPLRHPQLFK       | 12  | 5545  | 0.27 | 0.16 | 59  |
| 10 C06A1.1 | EMVELPLRHPQLFK       | 17  | 7091  | 0.36 | 0.43 | 121 |
| 22 C06A1.1 | RELQELVQYPVEHPEK     | 16  | 4597  | 0.40 | 0.17 | 42  |
| 10 C06A1.1 | EMVELPLRHPQLFK       | 12  | 5450  | 0.40 | 0.22 | 54  |
| 10 C06A1.1 | RELQELVQYPVEHPEK     | 39  | 8361  | 0.46 | 0.14 | 30  |
| 22 C06A1.1 | RELQELVQYPVEHPEK     | 55  | 10554 | 0.50 | 0.13 | 27  |
| 22 C06A1.1 | EMVELPLRHPQLFK       | 14  | 4164  | 0.51 | 0.15 | 29  |
| 10 C06A1.1 | MSGESESNLRK          | 27  | 3533  | 0.53 | 0.12 | 24  |
| 22 C06A1.1 | RELQELVQYPVEHPEK     | 24  | 7252  | 0.53 | 0.21 | 40  |
| 22 C06A1.1 | EMVELPLRHPQLFK       | 25  | 6318  | 0.53 | 0.13 | 25  |
| 7 C06A1.1  | RELQELVQYPVEHPEK     | 25  | 7679  | 0.54 | 0.14 | 25  |
| 1 C06A1.1  | MDELGLFRGDAVILK      | 16  | 519   | 0.54 | 0.11 | 21  |
| 22 C06A1.1 | RELQELVQYPVEHPEK     | 26  | 4612  | 0.56 | 0.40 | 71  |
| 22 C06A1.1 | RELQELVQYPVEHPEK     | 47  | 11078 | 0.56 | 0.14 | 25  |
| 22 C06A1.1 | DLDLTFLAK            | 30  | 505   | 0.57 | 0.14 | 25  |
| 10 C06A1.1 | MSGESESNLRK          | 19  | 2935  | 0.57 | 0.10 | 18  |
| 22 C06A1.1 | EMVELPLRHPQLFK       | 23  | 12392 | 0.59 | 0.28 | 47  |
| 10 C06A1.1 | EMVELPLRHPQLFK       | 12  | 7279  | 0.59 | 0.33 | 56  |
| 7 C06A1.1  | RELQELVQYPVEHPEK     | 39  | 8666  | 0.59 | 0.12 | 21  |
| 7 C06A1.1  | DLDLTFLAK            | 15  | 742   | 0.60 | 0.18 | 30  |
| 10 C06A1.1 | MSGESESNLRK          | 39  | 2996  | 0.60 | 0.14 | 23  |
| 10 C06A1.1 | AIGIKPPRGILLFGPPGTGK | 28  | 1944  | 0.60 | 0.35 | 58  |
| 10 C06A1.1 | EMVELPLRHPQLFK       | 11  | 7396  | 0.60 | 0.28 | 46  |
| 22 C06A1.1 | RELQELVQYPVEHPEK     | 31  | 11083 | 0.61 | 0.13 | 21  |
| 22 C06A1.1 | DLDLTFLAK            | 33  | 1372  | 0.61 | 0.11 | 18  |
| 10 C06A1.1 | RELQELVQYPVEHPEK     | 15  | 7338  | 0.62 | 0.23 | 38  |
| 7 C06A1.1  | RELQELVQYPVEHPEK     | 24  | 9453  | 0.63 | 0.20 | 32  |
| 10 C06A1.1 | RELQELVQYPVEHPEK     | 16  | 2171  | 0.64 | 0.18 | 28  |
| 22 C06A1.1 | EMVELPLRHPQLFK       | 10  | 3626  | 0.64 | 0.27 | 43  |
| 10 C06A1.1 | MSGESESNLRK          | 18  | 2308  | 0.64 | 0.12 | 18  |
| 7 C06A1.1  | DLDLTFLAK            | 35  | 1452  | 0.65 | 0.24 | 37  |
| 22 C06A1.1 | RELQELVQYPVEHPEK     | 36  | 5328  | 0.65 | 0.13 | 20  |
| 7 C06A1.1  | RELQELVQYPVEHPEK     | 40  | 5517  | 0.66 | 0.17 | 26  |
| 22 C06A1.1 | EMVELPLRHPQLFK       | 27  | 15336 | 0.67 | 0.22 | 32  |
| 22 C06A1.1 | EMVELPLRHPQLFK       | 11  | 12486 | 0.67 | 0.42 | 62  |
| 10 C06A1.1 | RELQELVQYPVEHPEK     | 41  | 11416 | 0.67 | 0.09 | 14  |
| 10 C06A1.1 | DLDLTFLAK            | 28  | 779   | 0.68 | 0.26 | 38  |
| 10 C06A1.1 | AIANECQANFISIK       | 23  | 1022  | 0.69 | 0.11 | 16  |
| 10 C06A1.1 | RELQELVQYPVEHPEK     | 39  | 8378  | 0.69 | 0.13 | 19  |
| 7 C06A1.1  | RELQELVQYPVEHPEK     | 31  | 9772  | 0.69 | 0.19 | 27  |
| 10 C06A1.1 | RELQELVQYPVEHPEK     | 44  | 10564 | 0.69 | 0.09 | 13  |
| 10 C06A1.1 | MDELGLFRGDAVILK      | 27  | 1352  | 0.71 | 0.12 | 17  |
| 10 C06A1.1 | RELQELVQYPVEHPEK     | 48  | 13492 | 0.71 | 0.09 | 12  |
| 22 C06A1.1 | RELQELVQYPVEHPEK     | 26  | 6037  | 0.71 | 0.11 | 16  |
| 10 C06A1.1 | RELQELVQYPVEHPEK     | 35  | 7058  | 0.75 | 0.07 | 9   |
| 22 C06A1.1 | DLDLTFLAK            | 38  | 976   | 0.75 | 0.07 | 9   |
| 7 C06A1.1  | LAIRESIEK            | 12  | 2876  | 0.75 | 0.21 | 28  |
| 10 C06A1.1 | RELQELVQYPVEHPEK     | 31  | 6713  | 0.75 | 0.20 | 26  |
| 10 C06A1.1 | RELQELVQYPVEHPEK     | 26  | 5521  | 0.78 | 0.12 | 16  |
| 22 C06A1.1 | RELQELVQYPVEHPEK     | 33  | 4674  | 0.78 | 0.14 | 18  |
| 10 C06A1.1 | MDELGLFRGDAVILK      | 10  | 800   | 0.79 | 0.16 | 21  |
| 22 C06A1.1 | DLDLTFLAK            | 32  | 936   | 0.79 | 0.09 | 11  |
| 10 C06A1.1 | DLDLTFLAK            | 52  | 736   | 0.81 | 0.17 | 22  |
| 10 C06A1.1 | DLDLTFLAK            | 46  | 990   | 0.81 | 0.26 | 32  |
| 22 C06A1.1 | RELQELVQYPVEHPEK     | 35  | 4880  | 0.83 | 0.11 | 13  |
| 10 C06A1.1 | RELQELVQYPVEHPEK     | 45  | 13858 | 0.83 | 0.09 | 11  |
| 7 C06A1.1  | DLDLTFLAK            | 27  | 844   | 0.84 | 0.18 | 22  |
| 10 C06A1.1 | RELQELVQYPVEHPEK     | 31  | 3414  | 0.84 | 0.09 | 10  |
| 7 C06A1.1  | RELQELVQYPVEHPEK     | 46  | 9739  | 0.84 | 0.13 | 16  |
| 10 C06A1.1 | DLDLTFLAK            | 33  | 951   | 0.85 | 0.29 | 34  |
| 7 C06A1.1  | RELQELVQYPVEHPEK     | 27  | 11793 | 0.85 | 0.12 | 14  |
| 22 C06A1.1 | MSGESESNLRK          | 23  | 4861  | 0.85 | 0.21 | 24  |
| 22 C06A1.1 | RELQELVQYPVEHPEK     | 37  | 11225 | 0.86 | 0.09 | 11  |
| 7 C06A1.1  | DLDLTFLAK            | 19  | 965   | 0.86 | 0.15 | 18  |
| 7 C06A1.1  | EMVELPLRHPQLFK       | 11  | 4211  | 0.87 | 0.29 | 34  |
| 22 C06A1.1 | RELQELVQYPVEHPEK     | 29  | 6564  | 0.87 | 0.12 | 14  |
| 22 C06A1.1 | MSGESESNLRK          | 26  | 4079  | 0.89 | 0.11 | 13  |
| 10 C06A1.1 | RELQELVQYPVEHPEK     | 41  | 5184  | 0.89 | 0.11 | 13  |
| 10 C06A1.1 | DLDLTFLAK            | 44  | 754   | 0.90 | 0.07 | 8   |
| 22 C06A1.1 | RELQELVQYPVEHPEK     | 46  | 6938  | 0.90 | 0.14 | 15  |
| 10 C06A1.1 | RELQELVQYPVEHPEK     | 30  | 4439  | 0.90 | 0.16 | 18  |
| 7 C06A1.1  | EMVELPLRHPQLFK       | 14  | 4761  | 0.90 | 0.16 | 18  |
| 10 C06A1.1 | LAIRESIEK            | 18  | 1628  | 0.91 | 0.39 | 43  |
| 22 C06A1.1 | RELQELVQYPVEHPEK     | 12  | 5387  | 0.95 | 0.23 | 25  |
| 7 C06A1.1  | RELQELVQYPVEHPEK     | 16  | 2206  | 0.95 | 0.12 | 13  |
| 1 C06A1.1  | DLDLTFLAK            | 29  | 398   | 0.95 | 0.19 | 20  |
| 7 C06A1.1  | EMVELPLRHPQLFK       | 22  | 4465  | 0.97 | 0.13 | 14  |
| 10 C06A1.1 | DLDLTFLAK            | 45  | 918   | 0.99 | 0.16 | 17  |
| 1 C06A1.1  | DLDLTFLAK            | 27  | 572   | 1.00 | 0.17 | 17  |
| 1 C06A1.1  | MDELGLFRGDAVILK      | 15  | 544   | 1.01 | 0.25 | 25  |
| 22 C06A1.1 | RELQELVQYPVEHPEK     | 27  | 5891  | 1.04 | 0.19 | 19  |
| 1 C06A1.1  | DLDLTFLAK            | 29  | 480   | 1.06 | 0.17 | 16  |
| 7 C06A1.1  | DLDLTFLAK            | 41  | 1284  | 1.09 | 0.11 | 10  |
| 22 C06A1.1 | NQPAILFIDEIDAIAPK    | 106 | 2875  | 1.11 | 0.15 | 14  |
| 10 C06A1.1 | DLDLTFLAK            | 25  | 807   | 1.12 | 0.25 | 23  |

|                                       |                     |    |       |       |      |     |
|---------------------------------------|---------------------|----|-------|-------|------|-----|
| 10 C06A1.1                            | DLDLTFLAK           | 21 | 658   | 1.12  | 0.27 | 24  |
| 22 C06A1.1                            | RELQELVQYPVEHPEK    | 30 | 3712  | 1.15  | 0.13 | 11  |
| 10 C06A1.1                            | DLDLTFLAK           | 15 | 559   | 1.20  | 0.15 | 13  |
| 22 C06A1.1                            | DLDLTFLAK           | 32 | 1083  | 1.20  | 0.11 | 10  |
| 10 C06A1.1                            | RELQELVQYPVEHPEK    | 13 | 5265  | 1.21  | 0.33 | 28  |
| 22 C06A1.1                            | RELQELVQYPVEHPEK    | 39 | 8964  | 1.21  | 0.07 | 6   |
| 10 C06A1.1                            | RELQELVQYPVEHPEK    | 65 | 20798 | 1.22  | 0.10 | 8   |
| 10 C06A1.1                            | GDIFTVQAAMRTVEFK    | 12 | 682   | 1.22  | 0.39 | 32  |
| 10 C06A1.1                            | EMVELPLRHPQLFK      | 26 | 3300  | 1.23  | 0.16 | 13  |
| 7 C06A1.1                             | DLDLTFLAK           | 21 | 1087  | 1.26  | 0.14 | 12  |
| 10 C06A1.1                            | RELQELVQYPVEHPEK    | 43 | 15833 | 1.30  | 0.08 | 6   |
| 22 C06A1.1                            | RELQELVQYPVEHPEK    | 30 | 12932 | 1.31  | 0.07 | 6   |
| 7 C06A1.1                             | DLDLTFLAK           | 29 | 930   | 1.37  | 0.13 | 9   |
| 10 C06A1.1                            | RELQELVQYPVEHPEK    | 18 | 5730  | 1.39  | 0.11 | 8   |
| 22 C06A1.1                            | NQPAILFIDEIDAIAPK   | 95 | 2027  | 1.40  | 0.26 | 19  |
| 7 C06A1.1                             | EMVELPLRHPQLFK      | 12 | 3647  | 1.42  | 0.29 | 20  |
| 10 C06A1.1                            | EMVELPLRHPQLFK      | 24 | 5465  | 1.43  | 0.07 | 5   |
| 22 C06A1.1                            | DLDLTFLAK           | 35 | 954   | 1.84  | 0.13 | 7   |
| 10 C06A1.1                            | DLDLTFLAK           | 37 | 1313  | 2.27  | 0.12 | 5   |
| 1 C06A1.1                             | DLDLTFLAK           | 23 | 432   | 2.30  | 0.12 | 5   |
| 10 C06A1.1                            | DLDLTFLAK           | 28 | 943   | 2.30  | 0.12 | 5   |
| 10 C06A1.1                            | DLDLTFLAK           | 27 | 909   | 2.68  | 0.06 | 2   |
| 10 C06A1.1                            | DLDLTFLAK           | 15 | 675   | 2.80  | 0.07 | 3   |
| 7 C06A1.1                             | RELQELVQYPVEHPEK    | 51 | 4427  | 10.33 | 0.31 | 3   |
| 22 C06A1.1                            | RELQELVQYPVEHPEK    | 40 | 9714  | 12.75 | 0.24 | 2   |
| 7 C06A6.4a;C06A6.4b                   | GFAVTEEFK           | 26 | 1745  | 0.31  | 0.10 | 32  |
| 7 C06A6.4a;C06A6.4b                   | GFAVTEEFK           | 18 | 1196  | 0.33  | 0.15 | 44  |
| 7 C06A6.4a;C06A6.4b                   | GFAVTEEFK           | 24 | 1452  | 0.34  | 0.12 | 36  |
| 22 C06A6.4a;C06A6.4b                  | LIASVDEFRNEQK       | 24 | 2103  | 0.47  | 0.45 | 96  |
| 7 C06A6.4a;C06A6.4b                   | LIASVDEFRNEQK       | 23 | 1693  | 0.51  | 0.30 | 59  |
| 22 C06A6.4a;C06A6.4b                  | TFLRGVEIYETLINK     | 32 | 2023  | 0.54  | 0.14 | 26  |
| 22 C06A6.4a;C06A6.4b                  | TFLRGVEIYETLINK     | 20 | 1551  | 0.56  | 0.20 | 35  |
| 7 C06A6.4a;C06A6.4b                   | GFAVTEEFK           | 38 | 3409  | 0.59  | 0.13 | 23  |
| 7 C06A6.4a;C06A6.4b                   | VTLPGHPGHGSK        | 14 | 3897  | 0.64  | 0.35 | 55  |
| 22 C06A6.4a;C06A6.4b                  | LIASVDEFRNEQK       | 26 | 6191  | 0.69  | 0.25 | 37  |
| 7 C06A6.4a;C06A6.4b                   | GFAVTEEFK           | 24 | 2463  | 0.71  | 0.14 | 20  |
| 22 C06A6.4a;C06A6.4b                  | LIASVDEFRNEQK       | 35 | 6883  | 0.81  | 0.17 | 21  |
| 22 C06A6.4a;C06A6.4b                  | LIASVDEFRNEQK       | 42 | 1425  | 0.98  | 0.28 | 28  |
| 22 C06A6.4a;C06A6.4b                  | VTLPGHPGHGSK        | 13 | 12661 | 1.12  | 0.24 | 21  |
| 22 C06A6.4a;C06A6.4b                  | GFAVTEEFK           | 45 | 6131  | 1.54  | 0.07 | 4   |
| 22 C06A6.4a;C06A6.4b                  | GFAVTEEFK           | 46 | 4981  | 1.99  | 0.09 | 5   |
| 1 C06A6.4a;C06A6.4b                   | VTLPGHPGHGSK        | 12 | 3018  | 6.69  | 0.15 | 2   |
| 7 C06A6.5                             | LREFVMDLHSGK        | 16 | 1136  | 0.64  | 0.09 | 14  |
| 7 C06A6.5                             | LREFVMDLHSGK        | 10 | 2169  | 0.73  | 0.35 | 48  |
| 10 C06E7.1a;C06E7.1b                  | AVIPANLDDK          | 10 | 1052  | 0.45  | 0.11 | 25  |
| 7 C06E7.1a;T13A10.11a;C06E7.1c        | AVIPANLDDK          | 16 | 1202  | 0.29  | 0.23 | 79  |
| 22 C06E7.3a                           | AVVDYQVLVRNVIK      | 12 | 930   | 0.47  | 0.10 | 22  |
| 22 C06E7.3a                           | AVVDYQVLVRNVIK      | 28 | 1076  | 0.67  | 0.39 | 58  |
| 22 C06G3.10                           | AASFASELK           | 11 | 2345  | 1.11  | 0.04 | 4   |
| 10 C06G3.5a;C06G3.5b                  | VLVTHEPANLSK        | 35 | 10022 | 1.11  | 0.17 | 15  |
| 10 C06G3.5a;C06G3.5b                  | VLVTHEPANLSK        | 28 | 7982  | 1.12  | 0.04 | 4   |
| 7 C06G3.5a;C06G3.5b                   | VLVTHEPANLSK        | 35 | 6952  | 1.20  | 0.21 | 17  |
| 7 C06G3.5a;C06G3.5b                   | VLVTHEPANLSK        | 33 | 4274  | 1.35  | 0.08 | 6   |
| 10 C06G3.5a;C06G3.5b                  | VLVTHEPANLSK        | 19 | 10525 | 2.12  | 0.13 | 6   |
| 10 C06G3.5a;C06G3.5b                  | VLVTHEPANLSK        | 18 | 10477 | 2.51  | 0.12 | 5   |
| 22 C06G3.5b                           | VLVTHEPANLSK        | 41 | 10008 | 0.57  | 0.10 | 18  |
| 22 C06G3.5b                           | VLVTHEPANLSK        | 15 | 2499  | 0.91  | 0.09 | 9   |
| 22 C06G3.5b                           | VLVTHEPANLSK        | 19 | 9226  | 1.43  | 0.04 | 3   |
| 22 C06G4.2a;C06G4.2b;C06G4.2d         | VILDNIISGK          | 40 | 942   | 0.56  | 0.18 | 32  |
| 22 C06G4.2a;C06G4.2b;C06G4.2d         | VILDNIISGK          | 11 | 407   | 0.82  | 0.07 | 9   |
| 22 C06G4.2a;C06G4.2b;C06G4.2d         | VILDNIISGK          | 40 | 1035  | 0.97  | 0.18 | 19  |
| 22 C06G4.2a;C06G4.2b;C06G4.2d         | VILDNIISGK          | 29 | 885   | 1.11  | 0.15 | 13  |
| 22 C06G4.2a;C06G4.2b;C06G4.2d         | VILDNIISGK          | 45 | 1202  | 1.29  | 0.21 | 17  |
| 22 C06G4.2a;C06G4.2b;C06G4.2d         | VILDNIISGK          | 16 | 509   | 1.29  | 0.21 | 16  |
| 22 C06G4.2a;C06G4.2b;C06G4.2d         | VILDNIISGK          | 41 | 1251  | 1.40  | 0.11 | 8   |
| 1 C06G4.2a;C06G4.2b;C06G4.2d;C06G4.2c | VILDNIISGK          | 13 | 389   | 1.05  | 0.06 | 6   |
| 10 C06G4.2a;C06G4.2d;C06G4.2b         | VILDNIISGK          | 19 | 649   | 0.86  | 0.21 | 25  |
| 10 C06G4.2a;C06G4.2d;C06G4.2b         | VILDNIISGK          | 44 | 1523  | 1.50  | 0.16 | 11  |
| 10 C06G4.2a;C06G4.2d;C06G4.2b         | VILDNIISGK          | 36 | 1395  | 1.70  | 0.12 | 7   |
| 10 C06G4.2a;C06G4.2d;C06G4.2b         | VILDNIISGK          | 56 | 1440  | 2.08  | 0.15 | 7   |
| 10 C06G4.2a;C06G4.2d;C06G4.2b         | VILDNIISGK          | 25 | 1084  | 2.12  | 0.05 | 2   |
| 1 C06H2.1                             | ALPAHSAVLDSLQK      | 50 | 7724  | 0.36  | 0.18 | 50  |
| 1 C06H2.1                             | ALPAHSAVLDSLQK      | 46 | 9784  | 0.47  | 0.18 | 39  |
| 1 C06H2.1                             | GVSQTFQSAVSQLPADLPK | 28 | 1212  | 0.76  | 0.21 | 27  |
| 10 C06H2.1                            | ALPAHSAVLDSLQK      | 55 | 5177  | 0.79  | 0.19 | 24  |
| 10 C06H2.1                            | ALPAHSAVLDSLQK      | 66 | 19495 | 0.92  | 0.14 | 16  |
| 10 C06H2.1                            | ALPAHSAVLDSLQK      | 41 | 14428 | 0.94  | 0.12 | 12  |
| 10 C06H2.1                            | RVATSSVNWSK         | 41 | 8017  | 1.07  | 0.18 | 17  |
| 7 C06H2.1                             | LAERLVPEHAAELTRVK   | 17 | 4621  | 1.09  | 0.21 | 19  |
| 10 C06H2.1                            | ALPAHSAVLDSLQK      | 29 | 6785  | 1.10  | 0.09 | 8   |
| 10 C06H2.1                            | ALPAHSAVLDSLQK      | 13 | 3739  | 1.17  | 0.08 | 7   |
| 22 C06H2.1                            | IDFAALK             | 11 | 564   | 1.30  | 0.25 | 19  |
| 10 C06H2.1                            | GVSQTFQSAVSQLPADLPK | 42 | 2298  | 1.32  | 0.12 | 9   |
| 22 C06H2.1                            | ALPAHSAVLDSLQK      | 63 | 14393 | 1.37  | 0.10 | 7   |
| 22 C06H2.1                            | ALPAHSAVLDSLQK      | 60 | 15106 | 1.38  | 0.16 | 12  |
| 10 C06H2.1                            | GVSQTFQSAVSQLPADLPK | 12 | 1581  | 1.54  | 0.28 | 18  |
| 10 C06H2.1                            | GVSQTFQSAVSQLPADLPK | 17 | 949   | 1.62  | 0.19 | 12  |
| 22 C06H2.1                            | ALPAHSAVLDSLQK      | 16 | 3977  | 1.93  | 0.10 | 5   |
| 10 C06H2.1                            | RVATSSVNWSK         | 12 | 2938  | 2.32  | 0.16 | 7   |
| 22 C06H2.1                            | GVSQTFQSAVSQLPADLPK | 36 | 2484  | 2.41  | 0.09 | 4   |
| 22 C06H2.1                            | GVSQTFQSAVSQLPADLPK | 16 | 1721  | 2.58  | 0.27 | 11  |
| 22 C06H2.1                            | GVSQTFQSAVSQLPADLPK | 52 | 4704  | 2.60  | 0.12 | 5   |
| 10 C06H2.1                            | RVATSSVNWSK         | 37 | 5434  | 2.64  | 0.07 | 3   |
| 22 C06H2.1                            | RVATSSVNWSK         | 16 | 5565  | 3.52  | 0.10 | 3   |
| 22 C06H2.1                            | RVATSSVNWSK         | 19 | 6317  | 4.29  | 0.13 | 3   |
| 7 C07A12.4a;C07A12.4b                 | LDATVHGEVSSK        | 20 | 1673  | 0.05  | 0.21 | 403 |
| 7 C07A12.4a;C07A12.4b                 | SHNLLFVSK           | 14 | 1488  | 0.10  | 0.25 | 245 |
| 7 C07A12.4a;C07A12.4b                 | QLAPTWDK            | 15 | 1829  | 0.18  | 0.42 | 239 |
| 7 C07A12.4a;C07A12.4b                 | IQSFPTIK            | 19 | 2607  | 0.22  | 0.50 | 231 |
| 7 C07A12.4a;C07A12.4b                 | LDATVHGEVSSK        | 19 | 1321  | 0.26  | 0.26 | 102 |
| 7 C07A12.4a;C07A12.4b                 | FEVRGYPTLK          | 26 | 2102  | 0.27  | 0.51 | 186 |

|                        |                           |    |       |      |      |    |
|------------------------|---------------------------|----|-------|------|------|----|
| 10 C07A12.4a;C07A12.4b | DELPAIRLISLEEDMTK         | 16 | 762   | 0.29 | 0.09 | 32 |
| 7 C07A12.4a;C07A12.4b  | MDSTLNEVEDVK              | 81 | 8296  | 0.29 | 0.13 | 45 |
| 7 C07A12.4a;C07A12.4b  | VVDYTGDRTIEGFTK           | 21 | 1331  | 0.29 | 0.27 | 93 |
| 10 C07A12.4a;C07A12.4b | FADDESIVIAK               | 51 | 11983 | 0.31 | 0.10 | 31 |
| 7 C07A12.4a;C07A12.4b  | LDATVHGEVSSK              | 72 | 12793 | 0.35 | 0.13 | 36 |
| 10 C07A12.4a;C07A12.4b | MDSTLNEVEDVK              | 76 | 7616  | 0.36 | 0.23 | 65 |
| 10 C07A12.4a;C07A12.4b | MDSTLNEVEDVK              | 60 | 3542  | 0.39 | 0.19 | 49 |
| 7 C07A12.4a;C07A12.4b  | FLETNGK                   | 20 | 3440  | 0.41 | 0.14 | 33 |
| 7 C07A12.4a;C07A12.4b  | VVDYTGDRTIEGFTK           | 65 | 33344 | 0.41 | 0.14 | 34 |
| 7 C07A12.4a;C07A12.4b  | MDSTLNEVEDVK              | 81 | 5070  | 0.42 | 0.20 | 47 |
| 7 C07A12.4a;C07A12.4b  | FADDESIVIAK               | 34 | 916   | 0.42 | 0.21 | 49 |
| 22 C07A12.4a;C07A12.4b | FADDESIVIAK               | 73 | 25737 | 0.43 | 0.11 | 25 |
| 7 C07A12.4a;C07A12.4b  | FADDESIVIAK               | 59 | 1618  | 0.43 | 0.18 | 43 |
| 7 C07A12.4a;C07A12.4b  | FTQNYLDGSVKPHLMSEDIPEDWDK | 33 | 3999  | 0.43 | 0.28 | 66 |
| 7 C07A12.4a;C07A12.4b  | NFEQVARDNTK               | 11 | 1022  | 0.43 | 0.08 | 18 |
| 7 C07A12.4a;C07A12.4b  | FADDESIVIAK               | 51 | 8244  | 0.43 | 0.21 | 50 |
| 7 C07A12.4a;C07A12.4b  | IQSFPTIK                  | 21 | 3225  | 0.43 | 0.12 | 28 |
| 22 C07A12.4a;C07A12.4b | FADDESIVIAK               | 66 | 15787 | 0.45 | 0.10 | 22 |
| 22 C07A12.4a;C07A12.4b | VVDYTGDRTIEGFTK           | 21 | 4048  | 0.46 | 0.20 | 43 |
| 10 C07A12.4a;C07A12.4b | LDATVHGEVSSK              | 70 | 9571  | 0.46 | 0.10 | 22 |
| 7 C07A12.4a;C07A12.4b  | SLAPEYAK                  | 16 | 54254 | 0.46 | 0.30 | 65 |
| 22 C07A12.4a;C07A12.4b | LDATVHGEVSSK              | 92 | 15333 | 0.46 | 0.13 | 28 |
| 10 C07A12.4a;C07A12.4b | VVDYTGDRTIEGFTK           | 18 | 4093  | 0.46 | 0.15 | 33 |
| 7 C07A12.4a;C07A12.4b  | SHNLLFVSK                 | 34 | 1666  | 0.46 | 0.19 | 41 |
| 7 C07A12.4a;C07A12.4b  | LDATVHGEVSSK              | 79 | 12034 | 0.47 | 0.11 | 24 |
| 7 C07A12.4a;C07A12.4b  | FTQNYLDGSVKPHLMSEDIPEDWDK | 26 | 7066  | 0.48 | 0.38 | 81 |
| 10 C07A12.4a;C07A12.4b | VVDYTGDRTIEGFTK           | 53 | 4917  | 0.48 | 0.08 | 17 |
| 22 C07A12.4a;C07A12.4b | LTQDGLK                   | 39 | 5668  | 0.48 | 0.06 | 12 |
| 7 C07A12.4a;C07A12.4b  | VVDYTGDRTIEGFTK           | 21 | 923   | 0.48 | 0.22 | 45 |
| 7 C07A12.4a;C07A12.4b  | FADDESIVIAK               | 57 | 3501  | 0.48 | 0.16 | 34 |
| 7 C07A12.4a;C07A12.4b  | NFEQVARDNTK               | 25 | 3044  | 0.50 | 0.13 | 26 |
| 22 C07A12.4a;C07A12.4b | VVDYTGDRTIEGFTK           | 51 | 8510  | 0.50 | 0.17 | 35 |
| 7 C07A12.4a;C07A12.4b  | VVDYTGDRTIEGFTK           | 26 | 1247  | 0.51 | 0.16 | 31 |
| 7 C07A12.4a;C07A12.4b  | VVDYTGDRTIEGFTK           | 22 | 3061  | 0.51 | 0.17 | 34 |
| 22 C07A12.4a;C07A12.4b | VVDYTGDRTIEGFTK           | 17 | 1588  | 0.52 | 0.29 | 56 |
| 7 C07A12.4a;C07A12.4b  | LDATVHGEVSSK              | 56 | 5723  | 0.52 | 0.14 | 28 |
| 10 C07A12.4a;C07A12.4b | NFEQVARDNTK               | 17 | 33442 | 0.52 | 0.17 | 33 |
| 7 C07A12.4a;C07A12.4b  | NFEQVARDNTK               | 33 | 1798  | 0.53 | 0.08 | 15 |
| 22 C07A12.4a;C07A12.4b | LDATVHGEVSSK              | 82 | 12510 | 0.53 | 0.06 | 12 |
| 10 C07A12.4a;C07A12.4b | LDATVHGEVSSK              | 80 | 10905 | 0.54 | 0.12 | 23 |
| 22 C07A12.4a;C07A12.4b | IQSFPTIK                  | 23 | 7301  | 0.54 | 0.14 | 26 |
| 7 C07A12.4a;C07A12.4b  | FKPDFEITTENISK            | 51 | 3883  | 0.55 | 0.18 | 33 |
| 22 C07A12.4a;C07A12.4b | VVDYTGDRTIEGFTK           | 58 | 19811 | 0.55 | 0.10 | 18 |
| 10 C07A12.4a;C07A12.4b | FEVRGYPTLK                | 25 | 5216  | 0.56 | 0.14 | 26 |
| 10 C07A12.4a;C07A12.4b | DELPAIRLISLEEDMTK         | 22 | 811   | 0.56 | 0.16 | 29 |
| 7 C07A12.4a;C07A12.4b  | GEGIVLFK                  | 32 | 2443  | 0.56 | 0.06 | 10 |
| 22 C07A12.4a;C07A12.4b | GEGIVLFK                  | 52 | 2884  | 0.56 | 0.12 | 21 |
| 22 C07A12.4a;C07A12.4b | IQSFPTIK                  | 21 | 3039  | 0.56 | 0.19 | 34 |
| 22 C07A12.4a;C07A12.4b | NFEQVARDNTK               | 37 | 14897 | 0.57 | 0.19 | 33 |
| 22 C07A12.4a;C07A12.4b | FEVRGYPTLK                | 24 | 3983  | 0.57 | 0.11 | 19 |
| 7 C07A12.4a;C07A12.4b  | LDATVHGEVSSK              | 35 | 5137  | 0.57 | 0.22 | 39 |
| 7 C07A12.4a;C07A12.4b  | VVDYTGDRTIEGFTK           | 47 | 19109 | 0.58 | 0.16 | 27 |
| 22 C07A12.4a;C07A12.4b | VVDYTGDRTIEGFTK           | 61 | 14613 | 0.58 | 0.12 | 21 |
| 7 C07A12.4a;C07A12.4b  | IQSFPTIK                  | 26 | 3504  | 0.58 | 0.13 | 22 |
| 7 C07A12.4a;C07A12.4b  | IQSFPTIK                  | 16 | 1598  | 0.59 | 0.14 | 23 |
| 22 C07A12.4a;C07A12.4b | GEGIVLFK                  | 40 | 2369  | 0.60 | 0.11 | 18 |
| 7 C07A12.4a;C07A12.4b  | FADDESIVIAK               | 12 | 646   | 0.60 | 0.14 | 23 |
| 7 C07A12.4a;C07A12.4b  | FKPDFEITTENISK            | 36 | 2506  | 0.60 | 0.12 | 19 |
| 7 C07A12.4a;C07A12.4b  | QLAPTWDK                  | 16 | 1525  | 0.60 | 0.21 | 35 |
| 22 C07A12.4a;C07A12.4b | DELPAIRLISLEEDMTK         | 16 | 770   | 0.60 | 0.16 | 27 |
| 22 C07A12.4a;C07A12.4b | VVDYTGDRTIEGFTK           | 52 | 6742  | 0.61 | 0.16 | 26 |
| 10 C07A12.4a;C07A12.4b | GEGIVLFK                  | 36 | 1611  | 0.61 | 0.14 | 24 |
| 7 C07A12.4a;C07A12.4b  | VVDYTGDRTIEGFTK           | 28 | 3770  | 0.61 | 0.20 | 32 |
| 7 C07A12.4a;C07A12.4b  | VVDYTGDRTIEGFTK           | 46 | 3478  | 0.61 | 0.18 | 29 |
| 10 C07A12.4a;C07A12.4b | FEVRGYPTLK                | 45 | 27988 | 0.62 | 0.18 | 29 |
| 7 C07A12.4a;C07A12.4b  | QLAPTWDK                  | 16 | 9179  | 0.62 | 0.17 | 28 |
| 7 C07A12.4a;C07A12.4b  | NFEQVARDNTK               | 35 | 23027 | 0.62 | 0.09 | 14 |
| 7 C07A12.4a;C07A12.4b  | QLAPTWDK                  | 14 | 6725  | 0.63 | 0.10 | 16 |
| 10 C07A12.4a;C07A12.4b | FEVRGYPTLK                | 14 | 1825  | 0.64 | 0.08 | 13 |
| 22 C07A12.4a;C07A12.4b | FEVRGYPTLK                | 13 | 1740  | 0.64 | 0.14 | 22 |
| 10 C07A12.4a;C07A12.4b | LDATVHGEVSSK              | 23 | 3864  | 0.65 | 0.17 | 26 |
| 10 C07A12.4a;C07A12.4b | LDATVHGEVSSK              | 35 | 4145  | 0.65 | 0.19 | 29 |
| 22 C07A12.4a;C07A12.4b | SHNLLFVSK                 | 28 | 3801  | 0.65 | 0.32 | 49 |
| 22 C07A12.4a;C07A12.4b | FFPAGSNK                  | 28 | 24380 | 0.66 | 0.03 | 4  |
| 7 C07A12.4a;C07A12.4b  | FADDESIVIAK               | 23 | 609   | 0.67 | 0.20 | 31 |
| 22 C07A12.4a;C07A12.4b | DELPAIRLISLEEDMTK         | 39 | 1967  | 0.67 | 0.17 | 25 |
| 7 C07A12.4a;C07A12.4b  | FKPDFEITTENISK            | 42 | 4080  | 0.67 | 0.07 | 10 |
| 7 C07A12.4a;C07A12.4b  | IQSFPTIK                  | 21 | 2778  | 0.67 | 0.14 | 21 |
| 22 C07A12.4a;C07A12.4b | FEVRGYPTLK                | 21 | 1978  | 0.67 | 0.14 | 21 |
| 22 C07A12.4a;C07A12.4b | FEVRGYPTLK                | 21 | 2105  | 0.68 | 0.23 | 34 |
| 22 C07A12.4a;C07A12.4b | DELPAIRLISLEEDMTK         | 42 | 2360  | 0.68 | 0.10 | 14 |
| 22 C07A12.4a;C07A12.4b | IQSFPTIK                  | 24 | 1751  | 0.68 | 0.18 | 26 |
| 10 C07A12.4a;C07A12.4b | VVDYTGDRTIEGFTK           | 21 | 4616  | 0.68 | 0.08 | 12 |
| 22 C07A12.4a;C07A12.4b | FEVRGYPTLK                | 26 | 5634  | 0.68 | 0.28 | 40 |
| 7 C07A12.4a;C07A12.4b  | NFEQVARDNTK               | 12 | 814   | 0.68 | 0.21 | 31 |
| 7 C07A12.4a;C07A12.4b  | GEGIVLFK                  | 11 | 1926  | 0.68 | 0.15 | 23 |
| 7 C07A12.4a;C07A12.4b  | NFEQVARDNTK               | 32 | 39221 | 0.68 | 0.23 | 34 |
| 22 C07A12.4a;C07A12.4b | DELPAIRLISLEEDMTK         | 28 | 1462  | 0.69 | 0.14 | 20 |
| 7 C07A12.4a;C07A12.4b  | GEGIVLFK                  | 40 | 7327  | 0.69 | 0.10 | 15 |
| 7 C07A12.4a;C07A12.4b  | NFEQVARDNTK               | 14 | 1527  | 0.69 | 0.10 | 15 |
| 10 C07A12.4a;C07A12.4b | NFEQVARDNTK               | 24 | 56768 | 0.69 | 0.10 | 14 |
| 7 C07A12.4a;C07A12.4b  | FFPAGSNK                  | 16 | 25125 | 0.70 | 0.16 | 23 |
| 7 C07A12.4a;C07A12.4b  | VVDYTGDRTIEGFTK           | 13 | 1190  | 0.71 | 0.12 | 17 |
| 7 C07A12.4a;C07A12.4b  | NFEQVARDNTK               | 14 | 1239  | 0.71 | 0.16 | 23 |
| 7 C07A12.4a;C07A12.4b  | NFEQVARDNTK               | 22 | 3365  | 0.71 | 0.12 | 18 |
| 22 C07A12.4a;C07A12.4b | VVDYTGDRTIEGFTK           | 30 | 2449  | 0.71 | 0.25 | 35 |
| 22 C07A12.4a;C07A12.4b | GEGIVLFK                  | 19 | 1227  | 0.72 | 0.07 | 10 |
| 22 C07A12.4a;C07A12.4b | FEVRGYPTLK                | 15 | 1254  | 0.72 | 0.07 | 10 |
| 7 C07A12.4a;C07A12.4b  | VVDYTGDRTIEGFTK           | 26 | 2539  | 0.73 | 0.11 | 16 |
| 7 C07A12.4a;C07A12.4b  | GEGIVLFK                  | 25 | 2550  | 0.73 | 0.17 | 23 |
| 10 C07A12.4a;C07A12.4b | FEVRGYPTLK                | 36 | 26785 | 0.73 | 0.14 | 20 |

|    |                     |                   |    |        |      |      |    |
|----|---------------------|-------------------|----|--------|------|------|----|
| 7  | C07A12.4a;C07A12.4b | NFEQVARDNTK       | 29 | 5117   | 0.73 | 0.18 | 24 |
| 22 | C07A12.4a;C07A12.4b | FEVRGYPTLK        | 48 | 64157  | 0.73 | 0.13 | 17 |
| 10 | C07A12.4a;C07A12.4b | FFPAGSNK          | 43 | 81674  | 0.73 | 0.06 | 9  |
| 7  | C07A12.4a;C07A12.4b | FEVRGYPTLK        | 15 | 5153   | 0.74 | 0.18 | 24 |
| 22 | C07A12.4a;C07A12.4b | IQSFPTIK          | 14 | 1540   | 0.74 | 0.19 | 26 |
| 10 | C07A12.4a;C07A12.4b | FFPAGSNK          | 44 | 71122  | 0.74 | 0.07 | 10 |
| 7  | C07A12.4a;C07A12.4b | DELPAIRLISLEEDMTK | 27 | 4017   | 0.74 | 0.12 | 16 |
| 7  | C07A12.4a;C07A12.4b | NFEQVARDNTK       | 17 | 2581   | 0.74 | 0.16 | 22 |
| 7  | C07A12.4a;C07A12.4b | FEVRGYPTLK        | 13 | 2095   | 0.75 | 0.10 | 14 |
| 22 | C07A12.4a;C07A12.4b | MDSTLNEVEDVK      | 46 | 2037   | 0.75 | 0.11 | 15 |
| 22 | C07A12.4a;C07A12.4b | FEVRGYPTLK        | 44 | 80393  | 0.75 | 0.11 | 14 |
| 22 | C07A12.4a;C07A12.4b | FADDESIVIAK       | 24 | 551    | 0.75 | 0.08 | 10 |
| 10 | C07A12.4a;C07A12.4b | MDSTLNEVEDVK      | 36 | 1402   | 0.76 | 0.15 | 20 |
| 7  | C07A12.4a;C07A12.4b | VVDYTGDRTIEGFTK   | 39 | 2670   | 0.76 | 0.08 | 10 |
| 7  | C07A12.4a;C07A12.4b | FKPDFEETTENISK    | 26 | 9827   | 0.76 | 0.16 | 22 |
| 7  | C07A12.4a;C07A12.4b | NFEQVARDNTK       | 31 | 3908   | 0.76 | 0.13 | 17 |
| 22 | C07A12.4a;C07A12.4b | NFEQVARDNTK       | 23 | 1587   | 0.77 | 0.18 | 23 |
| 7  | C07A12.4a;C07A12.4b | NFEQVARDNTK       | 11 | 1520   | 0.77 | 0.08 | 11 |
| 22 | C07A12.4a;C07A12.4b | FFPAGSNK          | 36 | 51511  | 0.79 | 0.13 | 17 |
| 7  | C07A12.4a;C07A12.4b | GEGIVLFK          | 29 | 1808   | 0.79 | 0.10 | 13 |
| 22 | C07A12.4a;C07A12.4b | FEVRGYPTLK        | 16 | 1609   | 0.79 | 0.17 | 22 |
| 7  | C07A12.4a;C07A12.4b | SHNLLFVSK         | 36 | 5589   | 0.79 | 0.09 | 11 |
| 7  | C07A12.4a;C07A12.4b | FFPAGSNK          | 27 | 37070  | 0.79 | 0.26 | 33 |
| 7  | C07A12.4a;C07A12.4b | DELPAIRLISLEEDMTK | 42 | 2423   | 0.80 | 0.14 | 17 |
| 7  | C07A12.4a;C07A12.4b | IQSFPTIK          | 50 | 97316  | 0.80 | 0.06 | 8  |
| 22 | C07A12.4a;C07A12.4b | GEGIVLFK          | 37 | 3457   | 0.81 | 0.10 | 12 |
| 22 | C07A12.4a;C07A12.4b | VVDYTGDRTIEGFTK   | 33 | 2148   | 0.81 | 0.15 | 19 |
| 7  | C07A12.4a;C07A12.4b | GEGIVLFK          | 27 | 1695   | 0.81 | 0.26 | 32 |
| 7  | C07A12.4a;C07A12.4b | NFEQVARDNTK       | 30 | 2417   | 0.82 | 0.11 | 13 |
| 7  | C07A12.4a;C07A12.4b | MDSTLNEVEDVK      | 52 | 2531   | 0.82 | 0.23 | 28 |
| 7  | C07A12.4a;C07A12.4b | SLAPEYAK          | 14 | 38567  | 0.82 | 0.43 | 53 |
| 22 | C07A12.4a;C07A12.4b | FKPDFEETTENISK    | 29 | 7330   | 0.83 | 0.12 | 14 |
| 22 | C07A12.4a;C07A12.4b | SHNLLFVSK         | 23 | 2702   | 0.83 | 0.30 | 35 |
| 7  | C07A12.4a;C07A12.4b | GEGIVLFK          | 50 | 8277   | 0.84 | 0.08 | 9  |
| 7  | C07A12.4a;C07A12.4b | VVDYTGDRTIEGFTK   | 26 | 9684   | 0.84 | 0.27 | 32 |
| 7  | C07A12.4a;C07A12.4b | NFEQVARDNTK       | 16 | 1516   | 0.85 | 0.07 | 8  |
| 7  | C07A12.4a;C07A12.4b | FKPDFEETTENISK    | 23 | 9721   | 0.85 | 0.34 | 40 |
| 22 | C07A12.4a;C07A12.4b | GEGIVLFK          | 26 | 1653   | 0.86 | 0.08 | 9  |
| 22 | C07A12.4a;C07A12.4b | FEVRGYPTLK        | 20 | 2463   | 0.86 | 0.23 | 26 |
| 7  | C07A12.4a;C07A12.4b | MDSTLNEVEDVK      | 37 | 1260   | 0.86 | 0.35 | 41 |
| 7  | C07A12.4a;C07A12.4b | GEGIVLFK          | 19 | 1628   | 0.87 | 0.13 | 15 |
| 22 | C07A12.4a;C07A12.4b | DELPAIRLISLEEDMTK | 33 | 1557   | 0.87 | 0.13 | 15 |
| 10 | C07A12.4a;C07A12.4b | GEGIVLFK          | 12 | 1560   | 0.87 | 0.09 | 11 |
| 7  | C07A12.4a;C07A12.4b | IQSFPTIK          | 13 | 2279   | 0.87 | 0.15 | 17 |
| 7  | C07A12.4a;C07A12.4b | GEGIVLFK          | 28 | 1631   | 0.88 | 0.12 | 14 |
| 22 | C07A12.4a;C07A12.4b | GEGIVLFK          | 28 | 1347   | 0.88 | 0.16 | 18 |
| 10 | C07A12.4a;C07A12.4b | MDSTLNEVEDVK      | 31 | 1323   | 0.88 | 0.23 | 26 |
| 7  | C07A12.4a;C07A12.4b | NFEQVARDNTK       | 13 | 9601   | 0.88 | 0.12 | 13 |
| 22 | C07A12.4a;C07A12.4b | MDSTLNEVEDVK      | 31 | 1268   | 0.89 | 0.13 | 15 |
| 22 | C07A12.4a;C07A12.4b | QLAPTWDK          | 42 | 34204  | 0.90 | 0.11 | 12 |
| 7  | C07A12.4a;C07A12.4b | VVDYTGDRTIEGFTK   | 16 | 10197  | 0.90 | 0.22 | 24 |
| 22 | C07A12.4a;C07A12.4b | QLAPTWDK          | 27 | 40915  | 0.90 | 0.12 | 13 |
| 10 | C07A12.4a;C07A12.4b | FEVRGYPTLK        | 28 | 3213   | 0.90 | 0.28 | 31 |
| 22 | C07A12.4a;C07A12.4b | IQSFPTIK          | 22 | 1313   | 0.90 | 0.13 | 15 |
| 10 | C07A12.4a;C07A12.4b | SHNLLFVSK         | 24 | 11213  | 0.92 | 0.22 | 23 |
| 22 | C07A12.4a;C07A12.4b | FLETNGK           | 10 | 1531   | 0.92 | 0.22 | 24 |
| 7  | C07A12.4a;C07A12.4b | FKPDFEETTENISK    | 51 | 11816  | 0.92 | 0.25 | 27 |
| 7  | C07A12.4a;C07A12.4b | VVDYTGDRTIEGFTK   | 27 | 1551   | 0.93 | 0.20 | 22 |
| 22 | C07A12.4a;C07A12.4b | FEVRGYPTLK        | 16 | 3074   | 0.93 | 0.21 | 22 |
| 10 | C07A12.4a;C07A12.4b | GEGIVLFK          | 82 | 143418 | 0.94 | 0.05 | 5  |
| 10 | C07A12.4a;C07A12.4b | LDATVHGEVSSK      | 81 | 20325  | 0.94 | 0.10 | 10 |
| 10 | C07A12.4a;C07A12.4b | GEGIVLFK          | 76 | 112310 | 0.95 | 0.05 | 5  |
| 10 | C07A12.4a;C07A12.4b | IQSFPTIK          | 46 | 115000 | 0.95 | 0.06 | 7  |
| 22 | C07A12.4a;C07A12.4b | FEVRGYPTLK        | 11 | 1496   | 0.96 | 0.22 | 23 |
| 7  | C07A12.4a;C07A12.4b | GEGIVLFK          | 83 | 101608 | 0.97 | 0.11 | 11 |
| 7  | C07A12.4a;C07A12.4b | GEGIVLFK          | 30 | 1197   | 0.97 | 0.23 | 24 |
| 10 | C07A12.4a;C07A12.4b | SHNLLFVSK         | 22 | 13194  | 0.97 | 0.12 | 12 |
| 7  | C07A12.4a;C07A12.4b | IQSFPTIK          | 20 | 2090   | 0.97 | 0.17 | 18 |
| 10 | C07A12.4a;C07A12.4b | GEGIVLFK          | 54 | 2347   | 0.98 | 0.09 | 9  |
| 22 | C07A12.4a;C07A12.4b | GEGIVLFK          | 58 | 3050   | 0.98 | 0.15 | 15 |
| 22 | C07A12.4a;C07A12.4b | DELPAIRLISLEEDMTK | 27 | 1532   | 0.99 | 0.12 | 13 |
| 22 | C07A12.4a;C07A12.4b | IQSFPTIK          | 20 | 1645   | 0.99 | 0.09 | 9  |
| 22 | C07A12.4a;C07A12.4b | GEGIVLFK          | 23 | 3915   | 0.99 | 0.09 | 9  |
| 7  | C07A12.4a;C07A12.4b | FEVRGYPTLK        | 26 | 1847   | 1.00 | 0.24 | 24 |
| 22 | C07A12.4a;C07A12.4b | FKPDFEETTENISK    | 46 | 15573  | 1.00 | 0.14 | 14 |
| 22 | C07A12.4a;C07A12.4b | MDSTLNEVEDVK      | 56 | 3486   | 1.00 | 0.26 | 26 |
| 7  | C07A12.4a;C07A12.4b | SHNLLFVSK         | 27 | 6981   | 1.00 | 0.15 | 15 |
| 7  | C07A12.4a;C07A12.4b | GEGIVLFK          | 87 | 188067 | 1.01 | 0.04 | 4  |
| 22 | C07A12.4a;C07A12.4b | NFEQVARDNTK       | 28 | 5549   | 1.01 | 0.13 | 12 |
| 7  | C07A12.4a;C07A12.4b | LDATVHGEVSSK      | 83 | 13552  | 1.03 | 0.08 | 8  |
| 7  | C07A12.4a;C07A12.4b | SHNLLFVSK         | 33 | 6022   | 1.03 | 0.18 | 18 |
| 22 | C07A12.4a;C07A12.4b | MDSTLNEVEDVK      | 81 | 5330   | 1.05 | 0.18 | 17 |
| 22 | C07A12.4a;C07A12.4b | NFEQVARDNTK       | 25 | 1381   | 1.05 | 0.21 | 20 |
| 22 | C07A12.4a;C07A12.4b | NFEQVARDNTK       | 19 | 5115   | 1.05 | 0.14 | 13 |
| 7  | C07A12.4a;C07A12.4b | VVDYTGDRTIEGFTK   | 28 | 6897   | 1.06 | 0.13 | 12 |
| 10 | C07A12.4a;C07A12.4b | SHNLLFVSK         | 29 | 4682   | 1.06 | 0.13 | 12 |
| 7  | C07A12.4a;C07A12.4b | SHNLLFVSK         | 39 | 7120   | 1.08 | 0.12 | 11 |
| 22 | C07A12.4a;C07A12.4b | GEGIVLFK          | 74 | 183028 | 1.08 | 0.08 | 7  |
| 7  | C07A12.4a;C07A12.4b | GEGIVLFK          | 41 | 1855   | 1.09 | 0.17 | 16 |
| 22 | C07A12.4a;C07A12.4b | IQSFPTIK          | 18 | 1746   | 1.09 | 0.19 | 18 |
| 22 | C07A12.4a;C07A12.4b | LDATVHGEVSSK      | 81 | 22825  | 1.10 | 0.09 | 8  |
| 22 | C07A12.4a;C07A12.4b | IQSFPTIK          | 51 | 94711  | 1.10 | 0.08 | 7  |
| 10 | C07A12.4a;C07A12.4b | FEVRGYPTLK        | 30 | 3585   | 1.10 | 0.14 | 13 |
| 7  | C07A12.4a;C07A12.4b | IQSFPTIK          | 15 | 2177   | 1.11 | 0.09 | 8  |
| 7  | C07A12.4a;C07A12.4b | IQSFPTIK          | 26 | 1962   | 1.11 | 0.13 | 11 |
| 10 | C07A12.4a;C07A12.4b | GEGIVLFK          | 25 | 2345   | 1.11 | 0.14 | 13 |
| 22 | C07A12.4a;C07A12.4b | NFEQVARDNTK       | 20 | 4918   | 1.12 | 0.07 | 7  |
| 10 | C07A12.4a;C07A12.4b | FEVRGYPTLK        | 28 | 2035   | 1.13 | 0.14 | 12 |
| 10 | C07A12.4a;C07A12.4b | QLAPTWDK          | 15 | 10145  | 1.14 | 0.08 | 7  |
| 7  | C07A12.4a;C07A12.4b | IQSFPTIK          | 37 | 2032   | 1.14 | 0.07 | 6  |
| 22 | C07A12.4a;C07A12.4b | LDATVHGEVSSK      | 69 | 19438  | 1.15 | 0.11 | 10 |

|                        |                 |    |        |      |      |    |
|------------------------|-----------------|----|--------|------|------|----|
| 7 C07A12.4a;C07A12.4b  | SHNLLFVSK       | 53 | 27484  | 1.15 | 0.10 | 8  |
| 10 C07A12.4a;C07A12.4b | LDATVHGEVSSK    | 69 | 14670  | 1.15 | 0.07 | 6  |
| 22 C07A12.4a;C07A12.4b | FKPDFEETTENISK  | 24 | 9508   | 1.15 | 0.27 | 23 |
| 10 C07A12.4a;C07A12.4b | FKPDFEETTENISK  | 38 | 18168  | 1.16 | 0.09 | 8  |
| 10 C07A12.4a;C07A12.4b | FKPDFEETTENISK  | 40 | 6873   | 1.16 | 0.11 | 9  |
| 7 C07A12.4a;C07A12.4b  | VVDYTGDRTIEGFTK | 22 | 6703   | 1.16 | 0.14 | 12 |
| 7 C07A12.4a;C07A12.4b  | LDATVHGEVSSK    | 69 | 14229  | 1.16 | 0.08 | 7  |
| 22 C07A12.4a;C07A12.4b | GEGIVLFK        | 18 | 1381   | 1.17 | 0.11 | 9  |
| 22 C07A12.4a;C07A12.4b | GEGIVLFK        | 22 | 2005   | 1.17 | 0.11 | 9  |
| 7 C07A12.4a;C07A12.4b  | SHNLLFVSK       | 19 | 2698   | 1.17 | 0.16 | 14 |
| 10 C07A12.4a;C07A12.4b | GEGIVLFK        | 37 | 2057   | 1.18 | 0.08 | 7  |
| 22 C07A12.4a;C07A12.4b | FKPDFEETTENISK  | 53 | 14942  | 1.22 | 0.26 | 21 |
| 22 C07A12.4a;C07A12.4b | FKPDFEETTENISK  | 28 | 6363   | 1.22 | 0.28 | 23 |
| 22 C07A12.4a;C07A12.4b | SHNLLFVSK       | 41 | 9076   | 1.23 | 0.11 | 9  |
| 22 C07A12.4a;C07A12.4b | SHNLLFVSK       | 21 | 8310   | 1.23 | 0.06 | 5  |
| 22 C07A12.4a;C07A12.4b | NFEQVARDNTK     | 18 | 22865  | 1.23 | 0.18 | 15 |
| 10 C07A12.4a;C07A12.4b | GEGIVLFK        | 27 | 2773   | 1.24 | 0.07 | 5  |
| 22 C07A12.4a;C07A12.4b | GEGIVLFK        | 23 | 1353   | 1.26 | 0.12 | 10 |
| 22 C07A12.4a;C07A12.4b | GEGIVLFK        | 69 | 173383 | 1.26 | 0.07 | 6  |
| 22 C07A12.4a;C07A12.4b | SHNLLFVSK       | 15 | 7298   | 1.26 | 0.09 | 7  |
| 22 C07A12.4a;C07A12.4b | IQSFPTIK        | 25 | 1824   | 1.26 | 0.19 | 15 |
| 22 C07A12.4a;C07A12.4b | SHNLLFVSK       | 17 | 5410   | 1.27 | 0.08 | 6  |
| 7 C07A12.4a;C07A12.4b  | VVDYTGDRTIEGFTK | 14 | 1623   | 1.27 | 0.12 | 10 |
| 22 C07A12.4a;C07A12.4b | SHNLLFVSK       | 14 | 6023   | 1.28 | 0.09 | 7  |
| 7 C07A12.4a;C07A12.4b  | FKPDFEETTENISK  | 24 | 7447   | 1.28 | 0.30 | 23 |
| 22 C07A12.4a;C07A12.4b | NFEQVARDNTK     | 26 | 4993   | 1.28 | 0.12 | 9  |
| 7 C07A12.4a;C07A12.4b  | SHNLLFVSK       | 53 | 18530  | 1.29 | 0.14 | 11 |
| 22 C07A12.4a;C07A12.4b | SHNLLFVSK       | 35 | 31856  | 1.29 | 0.13 | 10 |
| 22 C07A12.4a;C07A12.4b | SHNLLFVSK       | 52 | 16624  | 1.29 | 0.16 | 13 |
| 22 C07A12.4a;C07A12.4b | GEGIVLFK        | 14 | 1280   | 1.30 | 0.20 | 16 |
| 10 C07A12.4a;C07A12.4b | SHNLLFVSK       | 46 | 4390   | 1.31 | 0.09 | 7  |
| 7 C07A12.4a;C07A12.4b  | IQSFPTIK        | 11 | 1701   | 1.33 | 0.15 | 11 |
| 22 C07A12.4a;C07A12.4b | SHNLLFVSK       | 19 | 2062   | 1.33 | 0.17 | 13 |
| 22 C07A12.4a;C07A12.4b | GEGIVLFK        | 25 | 1060   | 1.33 | 0.18 | 13 |
| 22 C07A12.4a;C07A12.4b | GEGIVLFK        | 28 | 2618   | 1.34 | 0.13 | 10 |
| 22 C07A12.4a;C07A12.4b | GEGIVLFK        | 14 | 1298   | 1.34 | 0.10 | 7  |
| 22 C07A12.4a;C07A12.4b | FEVRGYPTLK      | 18 | 4559   | 1.35 | 0.14 | 10 |
| 22 C07A12.4a;C07A12.4b | SHNLLFVSK       | 53 | 15672  | 1.36 | 0.07 | 5  |
| 10 C07A12.4a;C07A12.4b | GEGIVLFK        | 14 | 1018   | 1.36 | 0.16 | 12 |
| 10 C07A12.4a;C07A12.4b | SHNLLFVSK       | 42 | 18217  | 1.38 | 0.17 | 12 |
| 22 C07A12.4a;C07A12.4b | SHNLLFVSK       | 41 | 11732  | 1.38 | 0.10 | 7  |
| 10 C07A12.4a;C07A12.4b | SHNLLFVSK       | 42 | 8670   | 1.40 | 0.14 | 10 |
| 22 C07A12.4a;C07A12.4b | SHNLLFVSK       | 42 | 9622   | 1.41 | 0.11 | 8  |
| 10 C07A12.4a;C07A12.4b | GEGIVLFK        | 22 | 1300   | 1.41 | 0.13 | 9  |
| 7 C07A12.4a;C07A12.4b  | SHNLLFVSK       | 54 | 17759  | 1.41 | 0.10 | 7  |
| 10 C07A12.4a;C07A12.4b | SHNLLFVSK       | 46 | 20161  | 1.41 | 0.11 | 8  |
| 22 C07A12.4a;C07A12.4b | SHNLLFVSK       | 59 | 273629 | 1.42 | 0.08 | 6  |
| 22 C07A12.4a;C07A12.4b | SHNLLFVSK       | 39 | 12675  | 1.43 | 0.13 | 9  |
| 7 C07A12.4a;C07A12.4b  | IQSFPTIK        | 27 | 1935   | 1.43 | 0.18 | 12 |
| 22 C07A12.4a;C07A12.4b | IQSFPTIK        | 22 | 4155   | 1.44 | 0.07 | 5  |
| 7 C07A12.4a;C07A12.4b  | FEVRGYPTLK      | 29 | 6772   | 1.44 | 0.15 | 11 |
| 7 C07A12.4a;C07A12.4b  | MDSTLNEVEDVK    | 20 | 997    | 1.45 | 0.11 | 8  |
| 22 C07A12.4a;C07A12.4b | IQSFPTIK        | 20 | 5057   | 1.45 | 0.09 | 6  |
| 22 C07A12.4a;C07A12.4b | IQSFPTIK        | 14 | 1262   | 1.45 | 0.13 | 9  |
| 22 C07A12.4a;C07A12.4b | FKPDFEETTENISK  | 32 | 6599   | 1.46 | 0.22 | 15 |
| 10 C07A12.4a;C07A12.4b | IQSFPTIK        | 22 | 2388   | 1.46 | 0.11 | 8  |
| 7 C07A12.4a;C07A12.4b  | IQSFPTIK        | 15 | 1568   | 1.47 | 0.11 | 8  |
| 10 C07A12.4a;C07A12.4b | IQSFPTIK        | 17 | 1897   | 1.47 | 0.11 | 8  |
| 22 C07A12.4a;C07A12.4b | SHNLLFVSK       | 23 | 3611   | 1.47 | 0.18 | 12 |
| 22 C07A12.4a;C07A12.4b | FEVRGYPTLK      | 19 | 7595   | 1.48 | 0.09 | 6  |
| 10 C07A12.4a;C07A12.4b | IQSFPTIK        | 24 | 2186   | 1.48 | 0.09 | 6  |
| 22 C07A12.4a;C07A12.4b | FKPDFEETTENISK  | 44 | 99446  | 1.49 | 0.23 | 16 |
| 10 C07A12.4a;C07A12.4b | GEGIVLFK        | 46 | 1861   | 1.50 | 0.06 | 4  |
| 7 C07A12.4a;C07A12.4b  | FKPDFEETTENISK  | 30 | 10186  | 1.51 | 0.18 | 12 |
| 7 C07A12.4a;C07A12.4b  | IQSFPTIK        | 28 | 1890   | 1.51 | 0.16 | 10 |
| 10 C07A12.4a;C07A12.4b | SHNLLFVSK       | 12 | 4147   | 1.51 | 0.12 | 8  |
| 7 C07A12.4a;C07A12.4b  | IQSFPTIK        | 29 | 1988   | 1.52 | 0.30 | 20 |
| 10 C07A12.4a;C07A12.4b | FKPDFEETTENISK  | 54 | 69823  | 1.52 | 0.11 | 7  |
| 22 C07A12.4a;C07A12.4b | SHNLLFVSK       | 55 | 15352  | 1.52 | 0.12 | 8  |
| 22 C07A12.4a;C07A12.4b | SHNLLFVSK       | 38 | 40617  | 1.53 | 0.07 | 4  |
| 22 C07A12.4a;C07A12.4b | VVDYTGDRTIEGFTK | 52 | 6299   | 1.53 | 0.12 | 8  |
| 22 C07A12.4a;C07A12.4b | SHNLLFVSK       | 27 | 3284   | 1.54 | 0.13 | 8  |
| 22 C07A12.4a;C07A12.4b | VVDYTGDRTIEGFTK | 69 | 12078  | 1.54 | 0.11 | 7  |
| 10 C07A12.4a;C07A12.4b | SHNLLFVSK       | 65 | 169061 | 1.54 | 0.06 | 4  |
| 10 C07A12.4a;C07A12.4b | NFEQVARDNTK     | 12 | 15131  | 1.54 | 0.16 | 11 |
| 22 C07A12.4a;C07A12.4b | GEGIVLFK        | 17 | 1474   | 1.55 | 0.14 | 9  |
| 22 C07A12.4a;C07A12.4b | SHNLLFVSK       | 62 | 210305 | 1.56 | 0.09 | 6  |
| 22 C07A12.4a;C07A12.4b | SHNLLFVSK       | 18 | 4865   | 1.58 | 0.07 | 5  |
| 7 C07A12.4a;C07A12.4b  | FEVRGYPTLK      | 24 | 7233   | 1.59 | 0.15 | 9  |
| 22 C07A12.4a;C07A12.4b | FKPDFEETTENISK  | 26 | 8267   | 1.60 | 0.24 | 15 |
| 10 C07A12.4a;C07A12.4b | SHNLLFVSK       | 73 | 7168   | 1.61 | 0.18 | 11 |
| 7 C07A12.4a;C07A12.4b  | SHNLLFVSK       | 12 | 1812   | 1.61 | 0.12 | 7  |
| 7 C07A12.4a;C07A12.4b  | SHNLLFVSK       | 24 | 9188   | 1.61 | 0.11 | 7  |
| 7 C07A12.4a;C07A12.4b  | SHNLLFVSK       | 64 | 247395 | 1.62 | 0.10 | 6  |
| 10 C07A12.4a;C07A12.4b | SHNLLFVSK       | 66 | 217280 | 1.64 | 0.09 | 5  |
| 22 C07A12.4a;C07A12.4b | SHNLLFVSK       | 43 | 9298   | 1.64 | 0.11 | 7  |
| 22 C07A12.4a;C07A12.4b | SHNLLFVSK       | 36 | 7928   | 1.64 | 0.06 | 3  |
| 22 C07A12.4a;C07A12.4b | SHNLLFVSK       | 18 | 1788   | 1.64 | 0.15 | 9  |
| 22 C07A12.4a;C07A12.4b | SLAPEYAK        | 14 | 25710  | 1.65 | 0.06 | 4  |
| 10 C07A12.4a;C07A12.4b | VVDYTGDRTIEGFTK | 61 | 6617   | 1.67 | 0.16 | 10 |
| 10 C07A12.4a;C07A12.4b | SHNLLFVSK       | 45 | 7326   | 1.67 | 0.04 | 2  |
| 10 C07A12.4a;C07A12.4b | SHNLLFVSK       | 25 | 5180   | 1.67 | 0.08 | 5  |
| 7 C07A12.4a;C07A12.4b  | GEGIVLFK        | 25 | 1938   | 1.67 | 0.16 | 9  |
| 7 C07A12.4a;C07A12.4b  | SHNLLFVSK       | 45 | 30392  | 1.68 | 0.17 | 10 |
| 7 C07A12.4a;C07A12.4b  | SHNLLFVSK       | 24 | 5402   | 1.69 | 0.16 | 10 |
| 10 C07A12.4a;C07A12.4b | SHNLLFVSK       | 13 | 1800   | 1.70 | 0.17 | 10 |
| 22 C07A12.4a;C07A12.4b | SHNLLFVSK       | 19 | 7753   | 1.70 | 0.20 | 12 |
| 22 C07A12.4a;C07A12.4b | IQSFPTIK        | 22 | 2228   | 1.71 | 0.10 | 6  |
| 10 C07A12.4a;C07A12.4b | SHNLLFVSK       | 20 | 2206   | 1.73 | 0.23 | 13 |
| 10 C07A12.4a;C07A12.4b | VVDYTGDRTIEGFTK | 61 | 10972  | 1.75 | 0.12 | 7  |
| 10 C07A12.4a;C07A12.4b | FEVRGYPTLK      | 20 | 7587   | 1.76 | 0.20 | 11 |

|                                 |                  |     |        |       |      |    |
|---------------------------------|------------------|-----|--------|-------|------|----|
| 10 C07A12.4a;C07A12.4b          | FKPDFEEITTENISK  | 71  | 87854  | 1.77  | 0.31 | 17 |
| 10 C07A12.4a;C07A12.4b          | SHNLLFVSK        | 62  | 9319   | 1.78  | 0.11 | 6  |
| 10 C07A12.4a;C07A12.4b          | SHNLLFVSK        | 28  | 4258   | 1.78  | 0.21 | 12 |
| 7 C07A12.4a;C07A12.4b           | SHNLLFVSK        | 13  | 7938   | 1.80  | 0.14 | 8  |
| 22 C07A12.4a;C07A12.4b          | IQSFPTIK         | 24  | 1962   | 1.82  | 0.18 | 10 |
| 10 C07A12.4a;C07A12.4b          | SHNLLFVSK        | 11  | 3015   | 1.83  | 0.19 | 11 |
| 7 C07A12.4a;C07A12.4b           | SHNLLFVSK        | 26  | 6575   | 1.84  | 0.20 | 11 |
| 7 C07A12.4a;C07A12.4b           | GEGIVLFK         | 12  | 1232   | 1.87  | 0.36 | 19 |
| 7 C07A12.4a;C07A12.4b           | SHNLLFVSK        | 54  | 208509 | 1.87  | 0.07 | 4  |
| 7 C07A12.4a;C07A12.4b           | SHNLLFVSK        | 33  | 3059   | 1.89  | 0.16 | 8  |
| 7 C07A12.4a;C07A12.4b           | SHNLLFVSK        | 64  | 16997  | 1.91  | 0.11 | 6  |
| 22 C07A12.4a;C07A12.4b          | QLAPTWDK         | 10  | 2807   | 1.92  | 0.09 | 5  |
| 7 C07A12.4a;C07A12.4b           | SHNLLFVSK        | 27  | 7151   | 1.94  | 0.11 | 6  |
| 7 C07A12.4a;C07A12.4b           | GEGIVLFK         | 29  | 2541   | 1.95  | 0.15 | 8  |
| 22 C07A12.4a;C07A12.4b          | SHNLLFVSK        | 53  | 9649   | 1.98  | 0.05 | 2  |
| 7 C07A12.4a;C07A12.4b           | SHNLLFVSK        | 12  | 2111   | 1.99  | 0.20 | 10 |
| 10 C07A12.4a;C07A12.4b          | GEGIVLFK         | 12  | 1398   | 2.03  | 0.20 | 10 |
| 22 C07A12.4a;C07A12.4b          | FKPDFEEITTENISK  | 57  | 79995  | 2.03  | 0.08 | 4  |
| 22 C07A12.4a;C07A12.4b          | QLAPTWDK         | 13  | 5137   | 2.09  | 0.17 | 8  |
| 7 C07A12.4a;C07A12.4b           | SHNLLFVSK        | 12  | 3439   | 2.10  | 0.09 | 4  |
| 10 C07A12.4a;C07A12.4b          | IQSFPTIK         | 25  | 1375   | 2.11  | 0.08 | 4  |
| 10 C07A12.4a;C07A12.4b          | GEGIVLFK         | 12  | 818    | 2.12  | 0.22 | 10 |
| 7 C07A12.4a;C07A12.4b           | SHNLLFVSK        | 34  | 16086  | 2.13  | 0.11 | 5  |
| 10 C07A12.4a;C07A12.4b          | IQSFPTIK         | 27  | 1702   | 2.18  | 0.27 | 12 |
| 7 C07A12.4a;C07A12.4b           | SHNLLFVSK        | 57  | 15830  | 2.18  | 0.24 | 11 |
| 10 C07A12.4a;C07A12.4b          | SHNLLFVSK        | 49  | 12327  | 2.20  | 0.16 | 7  |
| 22 C07A12.4a;C07A12.4b          | GEGIVLFK         | 21  | 1836   | 2.26  | 0.14 | 6  |
| 7 C07A12.4a;C07A12.4b           | SHNLLFVSK        | 44  | 8326   | 2.29  | 0.18 | 8  |
| 10 C07A12.4a;C07A12.4b          | IQSFPTIK         | 14  | 1084   | 2.39  | 0.08 | 3  |
| 10 C07A12.4a;C07A12.4b          | FEVRGYPTLK       | 20  | 1297   | 2.40  | 0.11 | 5  |
| 10 C07A12.4a;C07A12.4b          | SHNLLFVSK        | 60  | 7095   | 2.42  | 0.11 | 4  |
| 10 C07A12.4a;C07A12.4b          | FEVRGYPTLK       | 15  | 1199   | 2.44  | 0.16 | 7  |
| 10 C07A12.4a;C07A12.4b          | FKPDFEEITTENISK  | 32  | 5212   | 2.46  | 0.18 | 7  |
| 10 C07A12.4a;C07A12.4b          | SHNLLFVSK        | 55  | 7210   | 2.47  | 0.12 | 5  |
| 22 C07A12.4a;C07A12.4b          | SHNLLFVSK        | 58  | 8578   | 2.50  | 0.09 | 4  |
| 10 C07A12.4a;C07A12.4b          | GEGIVLFK         | 42  | 2104   | 2.50  | 0.20 | 8  |
| 10 C07A12.4a;C07A12.4b          | SHNLLFVSK        | 11  | 2263   | 2.61  | 0.10 | 4  |
| 22 C07A12.4a;C07A12.4b          | SHNLLFVSK        | 49  | 9268   | 2.65  | 0.09 | 3  |
| 7 C07A12.4a;C07A12.4b           | IQSFPTIK         | 16  | 2355   | 2.72  | 0.12 | 4  |
| 10 C07A12.4a;C07A12.4b          | SHNLLFVSK        | 51  | 6932   | 2.86  | 0.09 | 3  |
| 22 C07A12.4a;C07A12.4b          | SHNLLFVSK        | 55  | 6929   | 2.90  | 0.14 | 5  |
| 10 C07A12.4a;C07A12.4b          | GEGIVLFK         | 42  | 2164   | 2.97  | 0.10 | 3  |
| 22 C07A12.4a;C07A12.4b          | IQSFPTIK         | 26  | 3474   | 3.09  | 0.27 | 9  |
| 7 C07A12.4a;C07A12.4b           | IQSFPTIK         | 14  | 683    | 3.14  | 0.10 | 3  |
| 10 C07A12.4a;C07A12.4b          | GEGIVLFK         | 11  | 992    | 3.38  | 0.20 | 6  |
| 22 C07A12.4a;C07A12.4b          | IQSFPTIK         | 36  | 4278   | 3.62  | 0.13 | 4  |
| 10 C07A12.4a;C07A12.4b          | SHNLLFVSK        | 50  | 32279  | 3.74  | 0.11 | 3  |
| 7 C07A12.4a;C07A12.4b           | IQSFPTIK         | 13  | 1313   | 4.02  | 0.24 | 6  |
| 10 C07A12.4a;C07A12.4b          | SHNLLFVSK        | 45  | 25884  | 4.15  | 0.09 | 2  |
| 7 C07A12.4a;C07A12.4b           | SHNLLFVSK        | 41  | 6065   | 4.57  | 0.52 | 11 |
| 7 C07A12.4a;C07A12.4b           | GEGIVLFK         | 24  | 1397   | 5.55  | 0.56 | 10 |
| 7 C07A12.4a;C07A12.4b           | SHNLLFVSK        | 30  | 5081   | 10.30 | 0.42 | 4  |
| 22 C07A12.4a;C07A12.4b          | FKPDFEEITTENISK  | 69  | 6200   | 25.84 | 0.43 | 2  |
| 1 C07A12.4a;C07A12.4b;C07A12.4c | FEVRGYPTLK       | 16  | 2987   | 0.28  | 0.17 | 59 |
| 1 C07A12.4a;C07A12.4b;C07A12.4c | MDSTLNEVEDVK     | 102 | 4715   | 0.43  | 0.19 | 45 |
| 1 C07A12.4a;C07A12.4b;C07A12.4c | FLETNGK          | 14  | 1911   | 0.43  | 0.07 | 16 |
| 1 C07A12.4a;C07A12.4b;C07A12.4c | FEVRGYPTLK       | 24  | 2269   | 0.46  | 0.15 | 34 |
| 1 C07A12.4a;C07A12.4b;C07A12.4c | MDSTLNEVEDVK     | 109 | 3921   | 0.47  | 0.19 | 40 |
| 1 C07A12.4a;C07A12.4b;C07A12.4c | MDSTLNEVEDVK     | 111 | 4744   | 0.52  | 0.20 | 38 |
| 1 C07A12.4a;C07A12.4b;C07A12.4c | LDATVHGEVSSK     | 47  | 2611   | 0.52  | 0.16 | 31 |
| 1 C07A12.4a;C07A12.4b;C07A12.4c | LDATVHGEVSSK     | 64  | 3187   | 0.56  | 0.13 | 23 |
| 1 C07A12.4a;C07A12.4b;C07A12.4c | NFEQVARDNTK      | 18  | 1940   | 0.58  | 0.18 | 30 |
| 1 C07A12.4a;C07A12.4b;C07A12.4c | MDSTLNEVEDVK     | 102 | 4977   | 0.59  | 0.15 | 25 |
| 1 C07A12.4a;C07A12.4b;C07A12.4c | VVDYTGDRTIEGFTK  | 57  | 7691   | 0.66  | 0.17 | 25 |
| 1 C07A12.4a;C07A12.4b;C07A12.4c | VVDYTGDRTIEGFTK  | 55  | 5251   | 0.67  | 0.09 | 14 |
| 1 C07A12.4a;C07A12.4b;C07A12.4c | FFPAGSNK         | 17  | 7194   | 0.68  | 0.06 | 9  |
| 1 C07A12.4a;C07A12.4b;C07A12.4c | GEGIVLFK         | 37  | 1582   | 0.72  | 0.07 | 10 |
| 1 C07A12.4a;C07A12.4b;C07A12.4c | FFPAGSNK         | 32  | 16461  | 0.74  | 0.17 | 24 |
| 1 C07A12.4a;C07A12.4b;C07A12.4c | GEGIVLFK         | 42  | 1910   | 0.75  | 0.14 | 19 |
| 1 C07A12.4a;C07A12.4b;C07A12.4c | IQSFPTIK         | 38  | 35255  | 0.76  | 0.08 | 10 |
| 1 C07A12.4a;C07A12.4b;C07A12.4c | GEGIVLFK         | 64  | 13828  | 0.76  | 0.11 | 14 |
| 1 C07A12.4a;C07A12.4b;C07A12.4c | DELPAILISLEEDMTK | 11  | 1180   | 0.77  | 0.19 | 24 |
| 1 C07A12.4a;C07A12.4b;C07A12.4c | VVDYTGDRTIEGFTK  | 29  | 2120   | 0.77  | 0.21 | 27 |
| 1 C07A12.4a;C07A12.4b;C07A12.4c | DELPAILISLEEDMTK | 33  | 1453   | 0.78  | 0.12 | 15 |
| 1 C07A12.4a;C07A12.4b;C07A12.4c | FEVRGYPTLK       | 23  | 8456   | 0.78  | 0.10 | 13 |
| 1 C07A12.4a;C07A12.4b;C07A12.4c | GEGIVLFK         | 20  | 877    | 0.78  | 0.23 | 29 |
| 1 C07A12.4a;C07A12.4b;C07A12.4c | FEVRGYPTLK       | 18  | 11368  | 0.79  | 0.16 | 20 |
| 1 C07A12.4a;C07A12.4b;C07A12.4c | NFEQVARDNTK      | 23  | 5082   | 0.80  | 0.07 | 8  |
| 1 C07A12.4a;C07A12.4b;C07A12.4c | GEGIVLFK         | 14  | 1408   | 0.80  | 0.22 | 27 |
| 1 C07A12.4a;C07A12.4b;C07A12.4c | IQSFPTIK         | 53  | 39317  | 0.82  | 0.09 | 11 |
| 1 C07A12.4a;C07A12.4b;C07A12.4c | GEGIVLFK         | 45  | 2608   | 0.82  | 0.12 | 15 |
| 1 C07A12.4a;C07A12.4b;C07A12.4c | GEGIVLFK         | 32  | 986    | 0.84  | 0.14 | 16 |
| 1 C07A12.4a;C07A12.4b;C07A12.4c | FKPDFEEITTENISK  | 25  | 4541   | 0.84  | 0.34 | 40 |
| 1 C07A12.4a;C07A12.4b;C07A12.4c | VVDYTGDRTIEGFTK  | 12  | 1479   | 0.85  | 0.20 | 24 |
| 1 C07A12.4a;C07A12.4b;C07A12.4c | GEGIVLFK         | 73  | 17535  | 0.86  | 0.08 | 9  |
| 1 C07A12.4a;C07A12.4b;C07A12.4c | QLAPTWDK         | 12  | 4170   | 0.91  | 0.12 | 13 |
| 1 C07A12.4a;C07A12.4b;C07A12.4c | NFEQVARDNTK      | 11  | 14765  | 0.93  | 0.30 | 33 |
| 1 C07A12.4a;C07A12.4b;C07A12.4c | IQSFPTIK         | 14  | 1433   | 0.95  | 0.11 | 12 |
| 1 C07A12.4a;C07A12.4b;C07A12.4c | GEGIVLFK         | 31  | 1960   | 0.95  | 0.10 | 11 |
| 1 C07A12.4a;C07A12.4b;C07A12.4c | VVDYTGDRTIEGFTK  | 12  | 2231   | 0.97  | 0.08 | 9  |
| 1 C07A12.4a;C07A12.4b;C07A12.4c | GEGIVLFK         | 63  | 8569   | 1.00  | 0.07 | 7  |
| 1 C07A12.4a;C07A12.4b;C07A12.4c | MDSTLNEVEDVK     | 78  | 2706   | 1.01  | 0.21 | 21 |
| 1 C07A12.4a;C07A12.4b;C07A12.4c | QLAPTWDK         | 14  | 3760   | 1.01  | 0.07 | 7  |
| 1 C07A12.4a;C07A12.4b;C07A12.4c | FEVRGYPTLK       | 14  | 2846   | 1.04  | 0.12 | 11 |
| 1 C07A12.4a;C07A12.4b;C07A12.4c | NFEQVARDNTK      | 18  | 19728  | 1.06  | 0.09 | 8  |
| 1 C07A12.4a;C07A12.4b;C07A12.4c | VVDYTGDRTIEGFTK  | 21  | 1628   | 1.07  | 0.30 | 28 |
| 1 C07A12.4a;C07A12.4b;C07A12.4c | IQSFPTIK         | 17  | 684    | 1.07  | 0.15 | 14 |
| 1 C07A12.4a;C07A12.4b;C07A12.4c | IQSFPTIK         | 23  | 1585   | 1.07  | 0.12 | 12 |
| 1 C07A12.4a;C07A12.4b;C07A12.4c | VVDYTGDRTIEGFTK  | 16  | 2054   | 1.08  | 0.07 | 7  |
| 1 C07A12.4a;C07A12.4b;C07A12.4c | GEGIVLFK         | 64  | 10355  | 1.09  | 0.03 | 3  |
| 1 C07A12.4a;C07A12.4b;C07A12.4c | MDSTLNEVEDVK     | 46  | 1714   | 1.10  | 0.13 | 12 |

|                                 |                          |    |       |      |      |     |
|---------------------------------|--------------------------|----|-------|------|------|-----|
| 1 C07A12.4a;C07A12.4b;C07A12.4c | LDATVHGEVSSK             | 57 | 7672  | 1.11 | 0.14 | 13  |
| 1 C07A12.4a;C07A12.4b;C07A12.4c | FADDESIVIAK              | 68 | 3875  | 1.24 | 0.16 | 13  |
| 1 C07A12.4a;C07A12.4b;C07A12.4c | LDATVHGEVSSK             | 75 | 9662  | 1.25 | 0.12 | 10  |
| 1 C07A12.4a;C07A12.4b;C07A12.4c | VVDYTGDRTIEGFTK          | 28 | 1946  | 1.25 | 0.14 | 12  |
| 1 C07A12.4a;C07A12.4b;C07A12.4c | FKPDFEEITTENISK          | 15 | 2742  | 1.26 | 0.25 | 20  |
| 1 C07A12.4a;C07A12.4b;C07A12.4c | SHNLLFVSK                | 55 | 6125  | 1.31 | 0.08 | 6   |
| 1 C07A12.4a;C07A12.4b;C07A12.4c | IQSFPTIK                 | 21 | 1458  | 1.34 | 0.07 | 5   |
| 1 C07A12.4a;C07A12.4b;C07A12.4c | GEGIVLFK                 | 15 | 1467  | 1.35 | 0.12 | 9   |
| 1 C07A12.4a;C07A12.4b;C07A12.4c | SHNLLFVSK                | 45 | 7465  | 1.38 | 0.08 | 6   |
| 1 C07A12.4a;C07A12.4b;C07A12.4c | FADDESIVIAK              | 54 | 2618  | 1.38 | 0.15 | 11  |
| 1 C07A12.4a;C07A12.4b;C07A12.4c | SHNLLFVSK                | 50 | 70064 | 1.38 | 0.09 | 7   |
| 1 C07A12.4a;C07A12.4b;C07A12.4c | IQSFPTIK                 | 13 | 1470  | 1.39 | 0.10 | 7   |
| 1 C07A12.4a;C07A12.4b;C07A12.4c | SHNLLFVSK                | 17 | 2692  | 1.41 | 0.14 | 10  |
| 1 C07A12.4a;C07A12.4b;C07A12.4c | SHNLLFVSK                | 41 | 7951  | 1.42 | 0.14 | 10  |
| 1 C07A12.4a;C07A12.4b;C07A12.4c | IQSFPTIK                 | 23 | 2130  | 1.42 | 0.19 | 14  |
| 1 C07A12.4a;C07A12.4b;C07A12.4c | SHNLLFVSK                | 52 | 4341  | 1.44 | 0.10 | 7   |
| 1 C07A12.4a;C07A12.4b;C07A12.4c | IQSFPTIK                 | 13 | 1620  | 1.45 | 0.09 | 6   |
| 1 C07A12.4a;C07A12.4b;C07A12.4c | GEGIVLFK                 | 58 | 3606  | 1.47 | 0.15 | 10  |
| 1 C07A12.4a;C07A12.4b;C07A12.4c | SHNLLFVSK                | 29 | 5453  | 1.47 | 0.12 | 8   |
| 1 C07A12.4a;C07A12.4b;C07A12.4c | SHNLLFVSK                | 36 | 6036  | 1.49 | 0.10 | 7   |
| 1 C07A12.4a;C07A12.4b;C07A12.4c | FEVRGYPTLK               | 22 | 3371  | 1.49 | 0.25 | 17  |
| 1 C07A12.4a;C07A12.4b;C07A12.4c | SHNLLFVSK                | 43 | 94961 | 1.50 | 0.06 | 4   |
| 1 C07A12.4a;C07A12.4b;C07A12.4c | SHNLLFVSK                | 27 | 2700  | 1.52 | 0.19 | 13  |
| 1 C07A12.4a;C07A12.4b;C07A12.4c | GEGIVLFK                 | 49 | 2969  | 1.54 | 0.12 | 8   |
| 1 C07A12.4a;C07A12.4b;C07A12.4c | IQSFPTIK                 | 21 | 2056  | 1.58 | 0.09 | 6   |
| 1 C07A12.4a;C07A12.4b;C07A12.4c | IQSFPTIK                 | 21 | 2901  | 1.59 | 0.15 | 9   |
| 1 C07A12.4a;C07A12.4b;C07A12.4c | GEGIVLFK                 | 50 | 2802  | 1.71 | 0.13 | 8   |
| 1 C07A12.4a;C07A12.4b;C07A12.4c | VVDYTGDRTIEGFTK          | 55 | 5440  | 1.77 | 0.16 | 9   |
| 1 C07A12.4a;C07A12.4b;C07A12.4c | GEGIVLFK                 | 34 | 1844  | 1.83 | 0.07 | 4   |
| 1 C07A12.4a;C07A12.4b;C07A12.4c | SHNLLFVSK                | 33 | 2211  | 1.94 | 0.07 | 4   |
| 1 C07A12.4a;C07A12.4b;C07A12.4c | FEVRGYPTLK               | 25 | 6171  | 2.02 | 0.11 | 5   |
| 1 C07A12.4a;C07A12.4b;C07A12.4c | IQSFPTIK                 | 18 | 4536  | 2.03 | 0.13 | 6   |
| 1 C07A12.4a;C07A12.4b;C07A12.4c | SHNLLFVSK                | 65 | 3627  | 2.04 | 0.04 | 2   |
| 1 C07A12.4a;C07A12.4b;C07A12.4c | QLAPTWDK                 | 16 | 3559  | 2.08 | 0.28 | 13  |
| 1 C07A12.4a;C07A12.4b;C07A12.4c | QLAPTWDK                 | 17 | 3764  | 2.11 | 0.30 | 14  |
| 1 C07A12.4a;C07A12.4b;C07A12.4c | GEGIVLFK                 | 43 | 2327  | 2.12 | 0.09 | 4   |
| 1 C07A12.4a;C07A12.4b;C07A12.4c | IQSFPTIK                 | 17 | 619   | 2.19 | 0.20 | 9   |
| 1 C07A12.4a;C07A12.4b;C07A12.4c | IQSFPTIK                 | 25 | 3913  | 2.27 | 0.25 | 11  |
| 1 C07A12.4a;C07A12.4b;C07A12.4c | SHNLLFVSK                | 45 | 4955  | 2.29 | 0.11 | 5   |
| 1 C07A12.4a;C07A12.4b;C07A12.4c | SHNLLFVSK                | 42 | 23828 | 2.42 | 0.08 | 3   |
| 1 C07A12.4a;C07A12.4b;C07A12.4c | SHNLLFVSK                | 58 | 5610  | 2.44 | 0.10 | 4   |
| 1 C07A12.4a;C07A12.4b;C07A12.4c | SHNLLFVSK                | 45 | 4471  | 2.46 | 0.10 | 4   |
| 1 C07A12.4a;C07A12.4b;C07A12.4c | SHNLLFVSK                | 45 | 28400 | 2.58 | 0.12 | 5   |
| 1 C07A12.4a;C07A12.4b;C07A12.4c | VVDYTGDRTIEGFTK          | 38 | 4194  | 2.71 | 0.04 | 1   |
| 1 C07A12.4a;C07A12.4b;C07A12.4c | IQSFPTIK                 | 30 | 6939  | 3.09 | 0.13 | 4   |
| 7 C07A4.2                       | RLSNIGAIK                | 12 | 1706  | 0.53 | 0.29 | 54  |
| 10 C07D8.6                      | ELLEEGVVK                | 44 | 9665  | 0.14 | 0.59 | 430 |
| 7 C07D8.6                       | ELLEEGVVK                | 57 | 6902  | 0.16 | 0.18 | 110 |
| 22 C07D8.6                      | ELLEEGVVK                | 67 | 18985 | 0.20 | 0.14 | 71  |
| 10 C07D8.6                      | ELLEEGVVK                | 27 | 7639  | 0.21 | 0.63 | 305 |
| 7 C07D8.6                       | ELLEEGVVK                | 46 | 4304  | 0.22 | 0.26 | 118 |
| 1 C07D8.6                       | LEGGLESK                 | 24 | 3012  | 0.26 | 0.17 | 64  |
| 7 C07D8.6                       | LEGGLESK                 | 24 | 3237  | 0.32 | 0.16 | 49  |
| 10 C07D8.6                      | LEGGLESK                 | 31 | 6957  | 0.33 | 0.10 | 30  |
| 7 C07D8.6                       | LEGGLESK                 | 14 | 5410  | 0.36 | 0.10 | 27  |
| 22 C07D8.6                      | LEGGLESK                 | 12 | 2291  | 0.39 | 0.47 | 120 |
| 7 C07D8.6                       | AGYRLIDTASVYQNEEAIGTAIK  | 52 | 3101  | 0.41 | 0.18 | 43  |
| 10 C07D8.6                      | ELLEEGVVK                | 49 | 6472  | 0.45 | 0.39 | 86  |
| 10 C07D8.6                      | LEGGLESK                 | 28 | 9338  | 0.48 | 0.13 | 27  |
| 22 C07D8.6                      | REELFITK                 | 36 | 5237  | 0.53 | 0.14 | 26  |
| 22 C07D8.6                      | LEGGLESK                 | 20 | 2015  | 0.54 | 0.33 | 61  |
| 7 C07D8.6                       | AGYRLIDTASVYQNEEAIGTAIK  | 35 | 2435  | 0.54 | 0.18 | 33  |
| 10 C07D8.6                      | AWTHELAPGK               | 51 | 29784 | 0.55 | 0.06 | 11  |
| 10 C07D8.6                      | AWTHELAPGK               | 54 | 38768 | 0.56 | 0.11 | 19  |
| 10 C07D8.6                      | REELFITK                 | 43 | 23212 | 0.56 | 0.05 | 8   |
| 10 C07D8.6                      | AWTHELAPGK               | 44 | 21578 | 0.59 | 0.10 | 17  |
| 10 C07D8.6                      | AWTHELAPGK               | 17 | 2545  | 0.61 | 0.07 | 11  |
| 1 C07D8.6                       | REELFITK                 | 16 | 734   | 0.61 | 0.22 | 35  |
| 22 C07D8.6                      | LDWAPAPSDLQDQNVLALAEK    | 11 | 2939  | 0.62 | 0.19 | 31  |
| 22 C07D8.6                      | AGYRLIDTASVYQNEEAIGTAIK  | 50 | 3178  | 0.64 | 0.17 | 27  |
| 10 C07D8.6                      | AGYRLIDTASVYQNEEAIGTAIK  | 39 | 2709  | 0.65 | 0.08 | 12  |
| 7 C07D8.6                       | REELFITK                 | 31 | 2754  | 0.66 | 0.12 | 18  |
| 10 C07D8.6                      | AWTHELAPGK               | 41 | 22718 | 0.66 | 0.11 | 17  |
| 22 C07D8.6                      | ELLEEGVVK                | 46 | 8599  | 0.67 | 0.35 | 53  |
| 10 C07D8.6                      | AGYRLIDTASVYQNEEAIGTAIK  | 46 | 2747  | 0.67 | 0.11 | 17  |
| 10 C07D8.6                      | REELFITK                 | 50 | 21197 | 0.69 | 0.05 | 7   |
| 22 C07D8.6                      | LEGGLESK                 | 21 | 1766  | 0.71 | 0.16 | 22  |
| 7 C07D8.6                       | AWTHELAPGK               | 13 | 2776  | 0.71 | 0.08 | 11  |
| 22 C07D8.6                      | REELFITK                 | 37 | 21529 | 0.71 | 0.13 | 18  |
| 22 C07D8.6                      | ELLEEGVVK                | 48 | 8841  | 0.72 | 0.29 | 41  |
| 22 C07D8.6                      | AGYRLIDTASVYQNEEAIGTAIK  | 25 | 1175  | 0.74 | 0.17 | 24  |
| 10 C07D8.6                      | LEGGLESK                 | 11 | 2077  | 0.76 | 0.24 | 32  |
| 10 C07D8.6                      | LEGGLESK                 | 14 | 2414  | 0.76 | 0.12 | 15  |
| 1 C07D8.6                       | REELFITK                 | 12 | 275   | 0.77 | 0.14 | 18  |
| 1 C07D8.6                       | LEGGLESK                 | 10 | 1894  | 0.78 | 0.23 | 30  |
| 22 C07D8.6                      | AWTHELAPGK               | 64 | 42115 | 0.78 | 0.09 | 12  |
| 22 C07D8.6                      | SIQENRIK                 | 15 | 4343  | 0.78 | 0.14 | 18  |
| 22 C07D8.6                      | REELFITK                 | 31 | 1144  | 0.78 | 0.15 | 19  |
| 22 C07D8.6                      | REELFITK                 | 43 | 18657 | 0.79 | 0.06 | 7   |
| 22 C07D8.6                      | AWTHELAPGK               | 53 | 53389 | 0.79 | 0.10 | 12  |
| 7 C07D8.6                       | LEGGLESK                 | 14 | 4645  | 0.79 | 0.13 | 17  |
| 10 C07D8.6                      | REELFITK                 | 33 | 6701  | 0.79 | 0.10 | 13  |
| 22 C07D8.6                      | AGYRLIDTASVYQNEEAIGTAIK  | 44 | 9280  | 0.80 | 0.14 | 17  |
| 22 C07D8.6                      | NSQRLFLQDFMTGHPEDAFAAERK | 16 | 18440 | 0.81 | 0.15 | 19  |
| 7 C07D8.6                       | AWTHELAPGK               | 25 | 4292  | 0.81 | 0.10 | 13  |
| 22 C07D8.6                      | AGYRLIDTASVYQNEEAIGTAIK  | 42 | 6660  | 0.82 | 0.13 | 16  |
| 10 C07D8.6                      | NSQRLFLQDFMTGHPEDAFAAERK | 32 | 16882 | 0.82 | 0.10 | 12  |
| 7 C07D8.6                       | REELFITK                 | 18 | 4614  | 0.83 | 0.06 | 7   |
| 22 C07D8.6                      | AWTHELAPGK               | 25 | 4769  | 0.87 | 0.14 | 16  |
| 7 C07D8.6                       | NSQRLFLQDFMTGHPEDAFAAERK | 27 | 15154 | 0.87 | 0.15 | 18  |
| 22 C07D8.6                      | AWTHELAPGK               | 47 | 11727 | 0.88 | 0.10 | 11  |

|                      |                            |    |       |      |      |     |
|----------------------|----------------------------|----|-------|------|------|-----|
| 10 C07D8.6           | NSQRLFLQDFMTGHPEDAFAAERK   | 33 | 18676 | 0.89 | 0.15 | 17  |
| 22 C07D8.6           | AGYRLIDTASVYQNEEAIGTAIK    | 60 | 6848  | 0.90 | 0.15 | 16  |
| 10 C07D8.6           | NSQRLFLQDFMTGHPEDAFAAERK   | 56 | 13773 | 0.93 | 0.09 | 10  |
| 22 C07D8.6           | REELFITTK                  | 17 | 943   | 0.93 | 0.24 | 26  |
| 7 C07D8.6            | NSQRLFLQDFMTGHPEDAFAAERK   | 19 | 19156 | 0.95 | 0.07 | 7   |
| 1 C07D8.6            | REELFITTK                  | 38 | 1678  | 0.95 | 0.08 | 8   |
| 22 C07D8.6           | AWTHELAPGK                 | 28 | 5091  | 0.95 | 0.18 | 19  |
| 7 C07D8.6            | AGYRLIDTASVYQNEEAIGTAIK    | 35 | 2696  | 0.95 | 0.18 | 19  |
| 7 C07D8.6            | REELFITTK                  | 37 | 2109  | 0.97 | 0.19 | 20  |
| 10 C07D8.6           | AWTHELAPGK                 | 40 | 6083  | 0.97 | 0.06 | 7   |
| 22 C07D8.6           | AGYRLIDTASVYQNEEAIGTAIK    | 47 | 2992  | 0.98 | 0.29 | 29  |
| 10 C07D8.6           | AWTHELAPGK                 | 21 | 5972  | 0.98 | 0.06 | 7   |
| 22 C07D8.6           | AWTHELAPGK                 | 17 | 2441  | 0.99 | 0.21 | 21  |
| 10 C07D8.6           | REELFITTK                  | 24 | 1935  | 1.00 | 0.20 | 20  |
| 10 C07D8.6           | NSQRLFLQDFMTGHPEDAFAAERK   | 28 | 9154  | 1.00 | 0.09 | 9   |
| 22 C07D8.6           | AWTHELAPGK                 | 41 | 8029  | 1.01 | 0.09 | 9   |
| 7 C07D8.6            | AWTHELAPGK                 | 42 | 6752  | 1.01 | 0.04 | 4   |
| 7 C07D8.6            | AGYRLIDTASVYQNEEAIGTAIK    | 10 | 1769  | 1.02 | 0.12 | 11  |
| 22 C07D8.6           | AGYRLIDTASVYQNEEAIGTAIK    | 55 | 2648  | 1.03 | 0.18 | 17  |
| 7 C07D8.6            | AWTHELAPGK                 | 23 | 13358 | 1.04 | 0.05 | 5   |
| 10 C07D8.6           | NSQRLFLQDFMTGHPEDAFAAERK   | 26 | 17017 | 1.04 | 0.16 | 16  |
| 10 C07D8.6           | REELFITTK                  | 36 | 7834  | 1.04 | 0.08 | 7   |
| 10 C07D8.6           | REELFITTK                  | 25 | 2785  | 1.05 | 0.16 | 15  |
| 7 C07D8.6            | REELFITTK                  | 48 | 2852  | 1.06 | 0.13 | 12  |
| 22 C07D8.6           | LSNGVEMPVIGLTWQSSPAEVITAVK | 31 | 2509  | 1.07 | 0.29 | 27  |
| 10 C07D8.6           | NSQRLFLQDFMTGHPEDAFAAERK   | 42 | 25357 | 1.08 | 0.11 | 10  |
| 22 C07D8.6           | NSQRLFLQDFMTGHPEDAFAAERK   | 42 | 29965 | 1.09 | 0.15 | 14  |
| 22 C07D8.6           | NSQRLFLQDFMTGHPEDAFAAERK   | 25 | 22959 | 1.10 | 0.20 | 18  |
| 1 C07D8.6            | AWTHELAPGK                 | 36 | 5637  | 1.10 | 0.13 | 11  |
| 22 C07D8.6           | NSQRLFLQDFMTGHPEDAFAAERK   | 23 | 22493 | 1.11 | 0.18 | 16  |
| 7 C07D8.6            | REELFITTK                  | 25 | 1627  | 1.11 | 0.05 | 5   |
| 1 C07D8.6            | AWTHELAPGK                 | 30 | 4176  | 1.16 | 0.06 | 5   |
| 7 C07D8.6            | REELFITTK                  | 37 | 1283  | 1.17 | 0.06 | 5   |
| 22 C07D8.6           | REELFITTK                  | 21 | 1399  | 1.17 | 0.20 | 17  |
| 22 C07D8.6           | AWTHELAPGK                 | 20 | 3810  | 1.20 | 0.11 | 9   |
| 1 C07D8.6            | REELFITTK                  | 17 | 717   | 1.21 | 0.10 | 8   |
| 10 C07D8.6           | REELFITTK                  | 20 | 1598  | 1.21 | 0.12 | 10  |
| 7 C07D8.6            | LEGGLESK                   | 13 | 4329  | 1.21 | 0.16 | 13  |
| 10 C07D8.6           | LEGGLESK                   | 27 | 8056  | 1.24 | 0.04 | 3   |
| 1 C07D8.6            | REELFITTK                  | 14 | 1622  | 1.24 | 0.08 | 6   |
| 1 C07D8.6            | LEGGLESK                   | 11 | 2243  | 1.25 | 0.29 | 23  |
| 1 C07D8.6            | AGYRLIDTASVYQNEEAIGTAIK    | 36 | 1103  | 1.25 | 0.17 | 13  |
| 10 C07D8.6           | LEGGLESK                   | 13 | 7592  | 1.27 | 0.09 | 7   |
| 10 C07D8.6           | AWTHELAPGK                 | 13 | 5964  | 1.27 | 0.12 | 10  |
| 10 C07D8.6           | AWTHELAPGK                 | 36 | 8171  | 1.31 | 0.09 | 7   |
| 10 C07D8.6           | REELFITTK                  | 23 | 1587  | 1.33 | 0.05 | 4   |
| 10 C07D8.6           | AWTHELAPGK                 | 31 | 7284  | 1.35 | 0.09 | 7   |
| 10 C07D8.6           | REELFITTK                  | 11 | 1506  | 1.37 | 0.17 | 12  |
| 22 C07D8.6           | REELFITTK                  | 24 | 2625  | 1.37 | 0.12 | 8   |
| 10 C07D8.6           | AWTHELAPGK                 | 30 | 10484 | 1.40 | 0.07 | 5   |
| 10 C07D8.6           | REELFITTK                  | 28 | 2919  | 1.64 | 0.06 | 4   |
| 10 C07D8.6           | LEGGLESK                   | 13 | 5393  | 1.65 | 0.16 | 10  |
| 22 C07D8.6           | REELFITTK                  | 34 | 2005  | 1.69 | 0.07 | 4   |
| 22 C07D8.6           | AWTHELAPGK                 | 44 | 10326 | 1.76 | 0.06 | 3   |
| 22 C07D8.6           | REELFITTK                  | 27 | 3449  | 1.84 | 0.07 | 4   |
| 10 C07D8.6           | REELFITTK                  | 20 | 2532  | 1.89 | 0.16 | 8   |
| 22 C07D8.6           | REELFITTK                  | 28 | 3456  | 1.98 | 0.20 | 10  |
| 22 C07D8.6           | AWTHELAPGK                 | 32 | 6508  | 2.01 | 0.06 | 3   |
| 7 C07D8.6            | NSQRLFLQDFMTGHPEDAFAAERK   | 19 | 5560  | 2.07 | 0.08 | 4   |
| 22 C07D8.6           | LEGGLESK                   | 14 | 4985  | 2.21 | 0.08 | 4   |
| 7 C07D8.6            | NSQRLFLQDFMTGHPEDAFAAERK   | 23 | 4384  | 3.14 | 0.12 | 4   |
| 22 C07D8.6           | NSQRLFLQDFMTGHPEDAFAAERK   | 50 | 7301  | 4.62 | 0.16 | 3   |
| 22 C07D8.6           | NSQRLFLQDFMTGHPEDAFAAERK   | 20 | 5339  | 5.36 | 0.10 | 2   |
| 10 C07G2.3a;C07G2.3b | LGTAGLVREITFGAAK           | 61 | 733   | 0.07 | 0.25 | 352 |
| 10 C07G2.3a;C07G2.3b | SSLGIDAVFAGTNDMK           | 61 | 1553  | 0.11 | 0.38 | 350 |
| 10 C07G2.3a;C07G2.3b | RITGVEAVK                  | 34 | 5179  | 0.11 | 0.28 | 240 |
| 10 C07G2.3a;C07G2.3b | RITGVEAVK                  | 24 | 5663  | 0.13 | 0.33 | 248 |
| 10 C07G2.3a;C07G2.3b | LIDRGIHPIK                 | 11 | 6679  | 0.14 | 0.15 | 110 |
| 10 C07G2.3a;C07G2.3b | VGGREDTILVK                | 40 | 2055  | 0.16 | 0.29 | 179 |
| 10 C07G2.3a;C07G2.3b | LGTAGLVREITFGAAK           | 54 | 714   | 0.19 | 0.23 | 120 |
| 10 C07G2.3a;C07G2.3b | AVTIFVRGGNK                | 27 | 2409  | 0.23 | 0.19 | 80  |
| 1 C07G2.3a;C07G2.3b  | RITGVEAVK                  | 25 | 592   | 0.24 | 0.21 | 88  |
| 10 C07G2.3a;C07G2.3b | VGGREDTILVK                | 35 | 2129  | 0.24 | 0.24 | 102 |
| 7 C07G2.3a;C07G2.3b  | LIDRGIHPIK                 | 14 | 6065  | 0.43 | 0.13 | 30  |
| 7 C07G2.3a;C07G2.3b  | VGGREDTILVK                | 33 | 1513  | 0.44 | 0.44 | 101 |
| 1 C07G2.3a;C07G2.3b  | LGTAGLVREITFGAAK           | 48 | 569   | 0.46 | 0.11 | 23  |
| 7 C07G2.3a;C07G2.3b  | LGTAGLVREITFGAAK           | 50 | 958   | 0.47 | 0.17 | 36  |
| 22 C07G2.3a;C07G2.3b | AVTIFVRGGNK                | 26 | 3270  | 0.47 | 0.10 | 21  |
| 7 C07G2.3a;C07G2.3b  | LIDRGIHPIK                 | 12 | 5540  | 0.49 | 0.20 | 41  |
| 7 C07G2.3a;C07G2.3b  | RITGVEAVK                  | 19 | 1252  | 0.53 | 0.23 | 44  |
| 10 C07G2.3a;C07G2.3b | DVNFEMIK                   | 14 | 2023  | 0.55 | 0.56 | 102 |
| 22 C07G2.3a;C07G2.3b | AVTIFVRGGNK                | 12 | 1918  | 0.58 | 0.15 | 25  |
| 7 C07G2.3a;C07G2.3b  | RITGVEAVK                  | 31 | 2574  | 0.59 | 0.10 | 17  |
| 7 C07G2.3a;C07G2.3b  | SSLGIDAVFAGTNDMK           | 92 | 4452  | 0.60 | 0.07 | 12  |
| 22 C07G2.3a;C07G2.3b | VGGREDTILVK                | 35 | 1350  | 0.61 | 0.13 | 21  |
| 22 C07G2.3a;C07G2.3b | LIDRGIHPIK                 | 13 | 13616 | 0.61 | 0.10 | 16  |
| 7 C07G2.3a;C07G2.3b  | VGGREDTILVK                | 46 | 1421  | 0.62 | 0.25 | 40  |
| 22 C07G2.3a;C07G2.3b | LGTAGLVREITFGAAK           | 28 | 1519  | 0.62 | 0.14 | 22  |
| 7 C07G2.3a;C07G2.3b  | RITGVEAVK                  | 29 | 2544  | 0.62 | 0.13 | 20  |
| 1 C07G2.3a;C07G2.3b  | LGTAGLVREITFGAAK           | 18 | 507   | 0.62 | 0.13 | 21  |
| 22 C07G2.3a;C07G2.3b | LIDRGIHPIK                 | 17 | 5913  | 0.64 | 0.13 | 20  |
| 22 C07G2.3a;C07G2.3b | LGTAGLVREITFGAAK           | 59 | 1502  | 0.65 | 0.17 | 26  |
| 22 C07G2.3a;C07G2.3b | SSLGIDAVFAGTNDMK           | 72 | 3534  | 0.66 | 0.12 | 18  |
| 1 C07G2.3a;C07G2.3b  | VGGREDTILVK                | 20 | 1425  | 0.67 | 0.22 | 33  |
| 1 C07G2.3a;C07G2.3b  | LIDRGIHPIK                 | 15 | 6055  | 0.68 | 0.15 | 22  |
| 7 C07G2.3a;C07G2.3b  | LIDRGIHPIK                 | 12 | 7113  | 0.69 | 0.33 | 49  |
| 7 C07G2.3a;C07G2.3b  | SSLGIDAVFAGTNDMK           | 52 | 1907  | 0.69 | 0.30 | 44  |
| 10 C07G2.3a;C07G2.3b | SQDHEIGDGTGVVVLGALLEEAEK   | 49 | 2718  | 0.69 | 0.16 | 23  |
| 7 C07G2.3a;C07G2.3b  | VGGREDTILVK                | 14 | 1267  | 0.69 | 0.14 | 20  |
| 22 C07G2.3a;C07G2.3b | LIDRGIHPIK                 | 17 | 15527 | 0.70 | 0.23 | 33  |
| 1 C07G2.3a;C07G2.3b  | LIDRGIHPIK                 | 17 | 8949  | 0.73 | 0.18 | 24  |

|                      |                          |     |       |      |      |     |
|----------------------|--------------------------|-----|-------|------|------|-----|
| 1 C07G2.3a;C07G2.3b  | RITGVEAVK                | 32  | 3741  | 0.75 | 0.08 | 11  |
| 1 C07G2.3a;C07G2.3b  | VIETLLSK                 | 46  | 3161  | 0.75 | 0.09 | 12  |
| 22 C07G2.3a;C07G2.3b | LIDRGIHPIK               | 21  | 5960  | 0.76 | 0.11 | 14  |
| 7 C07G2.3a;C07G2.3b  | LIDRGIHPIK               | 12  | 4672  | 0.79 | 0.13 | 16  |
| 22 C07G2.3a;C07G2.3b | DVNFEMIK                 | 13  | 5318  | 0.81 | 0.22 | 27  |
| 1 C07G2.3a;C07G2.3b  | VGGRLEDTILVK             | 29  | 2642  | 0.81 | 0.15 | 18  |
| 1 C07G2.3a;C07G2.3b  | VGGRLEDTILVK             | 23  | 1437  | 0.81 | 0.18 | 23  |
| 22 C07G2.3a;C07G2.3b | RITGVEAVK                | 35  | 3242  | 0.83 | 0.09 | 11  |
| 7 C07G2.3a;C07G2.3b  | RITGVEAVK                | 18  | 2898  | 0.84 | 0.07 | 8   |
| 22 C07G2.3a;C07G2.3b | SSLGIDAVFAGTNDMK         | 100 | 4561  | 0.85 | 0.08 | 10  |
| 7 C07G2.3a;C07G2.3b  | VGGRLEDTILVK             | 30  | 6850  | 0.85 | 0.11 | 13  |
| 1 C07G2.3a;C07G2.3b  | RITGVEAVK                | 23  | 3662  | 0.85 | 0.06 | 7   |
| 1 C07G2.3a;C07G2.3b  | RITGVEAVK                | 25  | 3912  | 0.87 | 0.11 | 13  |
| 1 C07G2.3a;C07G2.3b  | LIDRGIHPIK               | 15  | 8328  | 0.88 | 0.09 | 10  |
| 1 C07G2.3a;C07G2.3b  | VIETLLSK                 | 52  | 3037  | 0.88 | 0.07 | 8   |
| 7 C07G2.3a;C07G2.3b  | VGGRLEDTILVK             | 35  | 8026  | 0.89 | 0.12 | 13  |
| 1 C07G2.3a;C07G2.3b  | RITGVEAVK                | 15  | 4336  | 0.90 | 0.08 | 9   |
| 22 C07G2.3a;C07G2.3b | MDVQHHVAK                | 10  | 11270 | 0.90 | 0.08 | 9   |
| 7 C07G2.3a;C07G2.3b  | SSLGIDAVFAGTNDMK         | 97  | 4711  | 0.91 | 0.13 | 14  |
| 1 C07G2.3a;C07G2.3b  | VGGRLEDTILVK             | 57  | 3500  | 0.91 | 0.16 | 17  |
| 22 C07G2.3a;C07G2.3b | LIDRGIHPIK               | 13  | 9678  | 0.93 | 0.13 | 14  |
| 22 C07G2.3a;C07G2.3b | VGGRLEDTILVK             | 22  | 1946  | 0.94 | 0.22 | 23  |
| 10 C07G2.3a;C07G2.3b | LIDRGIHPIK               | 25  | 15825 | 0.95 | 0.06 | 6   |
| 7 C07G2.3a;C07G2.3b  | RITGVEAVK                | 12  | 2473  | 0.96 | 0.08 | 8   |
| 7 C07G2.3a;C07G2.3b  | RITGVEAVK                | 28  | 1078  | 0.97 | 0.20 | 20  |
| 22 C07G2.3a;C07G2.3b | VGGRLEDTILVK             | 43  | 6207  | 0.97 | 0.06 | 6   |
| 22 C07G2.3a;C07G2.3b | RITGVEAVK                | 15  | 3300  | 0.97 | 0.12 | 13  |
| 10 C07G2.3a;C07G2.3b | LIDRGIHPIK               | 27  | 25702 | 1.04 | 0.09 | 9   |
| 10 C07G2.3a;C07G2.3b | RITGVEAVK                | 12  | 3937  | 1.04 | 0.06 | 6   |
| 22 C07G2.3a;C07G2.3b | VGGRLEDTILVK             | 45  | 5310  | 1.05 | 0.08 | 8   |
| 22 C07G2.3a;C07G2.3b | RITGVEAVK                | 23  | 4295  | 1.06 | 0.04 | 4   |
| 10 C07G2.3a;C07G2.3b | DVNFEMIK                 | 23  | 6218  | 1.06 | 0.15 | 14  |
| 10 C07G2.3a;C07G2.3b | LGTAGLVREITFGAAK         | 49  | 1256  | 1.08 | 0.15 | 14  |
| 22 C07G2.3a;C07G2.3b | AVTIFVRGGNK              | 10  | 1237  | 1.12 | 0.23 | 21  |
| 10 C07G2.3a;C07G2.3b | LGTAGLVREITFGAAK         | 64  | 1832  | 1.14 | 0.12 | 10  |
| 22 C07G2.3a;C07G2.3b | RITGVEAVK                | 23  | 5258  | 1.16 | 0.11 | 9   |
| 7 C07G2.3a;C07G2.3b  | RITGVEAVK                | 13  | 1209  | 1.22 | 0.14 | 12  |
| 10 C07G2.3a;C07G2.3b | RITGVEAVK                | 18  | 3044  | 1.26 | 0.16 | 13  |
| 22 C07G2.3a;C07G2.3b | SQDHEIGDGTGVVVLGALLEEAEK | 75  | 3293  | 1.26 | 0.13 | 10  |
| 22 C07G2.3a;C07G2.3b | SQDHEIGDGTGVVVLGALLEEAEK | 75  | 2448  | 1.27 | 0.13 | 11  |
| 7 C07G2.3a;C07G2.3b  | AVTIFVRGGNK              | 17  | 3773  | 1.30 | 0.14 | 11  |
| 10 C07G2.3a;C07G2.3b | SSLGIDAVFAGTNDMK         | 67  | 5102  | 1.32 | 0.08 | 6   |
| 10 C07G2.3a;C07G2.3b | SSLGIDAVFAGTNDMK         | 79  | 5224  | 1.37 | 0.14 | 10  |
| 1 C07G2.3a;C07G2.3b  | LIDRGIHPIK               | 27  | 9598  | 1.37 | 0.08 | 6   |
| 10 C07G2.3a;C07G2.3b | LIDRGIHPIK               | 15  | 5463  | 1.41 | 0.19 | 13  |
| 10 C07G2.3a;C07G2.3b | DVNFEMIK                 | 15  | 4942  | 1.42 | 0.16 | 11  |
| 1 C07G2.3a;C07G2.3b  | LIDRGIHPIK               | 24  | 6365  | 1.47 | 0.13 | 9   |
| 22 C07G2.3a;C07G2.3b | LIDRGIHPIK               | 13  | 8355  | 1.52 | 0.14 | 10  |
| 22 C07G2.3a;C07G2.3b | LIDRGIHPIK               | 13  | 6128  | 1.61 | 0.08 | 5   |
| 10 C07G2.3a;C07G2.3b | VGGRLEDTILVK             | 55  | 7142  | 1.63 | 0.13 | 8   |
| 7 C07G2.3a;C07G2.3b  | TMSHPQMPK                | 24  | 2481  | 1.75 | 0.15 | 8   |
| 10 C07G2.3a;C07G2.3b | MDVQHHVAK                | 13  | 14581 | 1.83 | 0.14 | 8   |
| 10 C07G2.3a;C07G2.3b | VGGRLEDTILVK             | 37  | 5746  | 1.85 | 0.13 | 7   |
| 10 C07G2.3a;C07G2.3b | AVTIFVRGGNK              | 13  | 3560  | 2.35 | 0.14 | 6   |
| 10 C07G2.3a;C07G2.3b | TMSHPQMPK                | 40  | 4646  | 2.73 | 0.10 | 4   |
| 10 C07G2.3a;C07G2.3b | LIDRGIHPIK               | 19  | 12833 | 2.75 | 0.23 | 8   |
| 10 C07G2.3a;C07G2.3b | LIDRGIHPIK               | 25  | 9175  | 2.85 | 0.16 | 6   |
| 10 C07G2.3a;C07G2.3b | TMSHPQMPK                | 22  | 3873  | 3.07 | 0.10 | 3   |
| 22 C07H6.5           | TLVLDEADK                | 16  | 2043  | 0.29 | 0.21 | 70  |
| 10 C08A9.1           | RDFGSLDNLQK              | 53  | 3534  | 0.49 | 0.26 | 53  |
| 10 C08A9.1           | NVRPDYVHAIWK             | 13  | 10545 | 2.10 | 0.10 | 5   |
| 10 C08B11.7          | LVGLVDNAYQAAK            | 87  | 1692  | 0.55 | 0.05 | 10  |
| 7 C08B11.7           | LVGLVDNAYQAAK            | 34  | 1406  | 0.97 | 0.09 | 9   |
| 7 C08B11.7           | LVGLVDNAYQAAK            | 72  | 1374  | 1.28 | 0.12 | 10  |
| 7 C08B11.7           | LVGLVDNAYQAAK            | 65  | 1239  | 1.29 | 0.12 | 9   |
| 1 C08B11.7           | LVGLVDNAYQAAK            | 65  | 1874  | 1.35 | 0.10 | 7   |
| 1 C08B11.7           | LVGLVDNAYQAAK            | 52  | 1497  | 1.66 | 0.15 | 9   |
| 10 C08B6.1a;C08B6.1b | NAIQMLIPVYFSK            | 13  | 7410  | 1.44 | 0.14 | 10  |
| 22 C08B6.8           | NYRESIFVK                | 28  | 3583  | 1.23 | 0.11 | 9   |
| 10 C08B6.8           | NYRESIFVK                | 22  | 4808  | 1.44 | 0.08 | 6   |
| 10 C08B6.8           | NYRESIFVK                | 27  | 4691  | 1.46 | 0.06 | 4   |
| 22 C08B6.9           | RIVPTSYPFLVK             | 45  | 2028  | 1.50 | 0.12 | 8   |
| 22 C08B6.9           | RIVPTSYPFLVK             | 59  | 1948  | 1.55 | 0.10 | 6   |
| 10 C08B6.9           | RIVPTSYPFLVK             | 42  | 1562  | 1.55 | 0.11 | 7   |
| 22 C08H9.2a;C08H9.2b | GSQVQVIRDSHPNVSVVFPDAK   | 16  | 2980  | 0.17 | 0.31 | 183 |
| 22 C08H9.2a;C08H9.2b | IHELQSK                  | 20  | 3554  | 0.17 | 0.37 | 220 |
| 22 C08H9.2a;C08H9.2b | EALLAMVPISK              | 38  | 897   | 0.20 | 0.20 | 101 |
| 22 C08H9.2a;C08H9.2b | QLSETVDIK                | 33  | 1917  | 0.20 | 0.19 | 95  |
| 22 C08H9.2a;C08H9.2b | NRIEDVVEDYEK             | 29  | 3037  | 0.21 | 0.35 | 166 |
| 22 C08H9.2a;C08H9.2b | GSQVQVIRDSHPNVSVVFPDAK   | 16  | 3663  | 0.22 | 0.26 | 121 |
| 22 C08H9.2a;C08H9.2b | AVGLLSALAK               | 64  | 2532  | 0.23 | 0.14 | 62  |
| 22 C08H9.2a;C08H9.2b | AVGLLSALAK               | 60  | 1953  | 0.23 | 0.09 | 40  |
| 22 C08H9.2a;C08H9.2b | IIGQRGATITALK            | 36  | 1116  | 0.24 | 0.10 | 43  |
| 22 C08H9.2a;C08H9.2b | EALLAMVPISK              | 45  | 1145  | 0.25 | 0.11 | 46  |
| 22 C08H9.2a;C08H9.2b | EALLAMVPISK              | 33  | 1080  | 0.25 | 0.19 | 74  |
| 22 C08H9.2a;C08H9.2b | ETIHLLGK                 | 26  | 1309  | 0.26 | 0.07 | 29  |
| 22 C08H9.2a;C08H9.2b | IIGQRGATITALK            | 26  | 955   | 0.26 | 0.07 | 28  |
| 22 C08H9.2a;C08H9.2b | IHELQSK                  | 26  | 4658  | 0.27 | 0.30 | 112 |
| 22 C08H9.2a;C08H9.2b | QLSETVDIK                | 21  | 1838  | 0.27 | 0.07 | 24  |
| 22 C08H9.2a;C08H9.2b | NFLARGAALVK              | 33  | 1578  | 0.29 | 0.16 | 54  |
| 22 C08H9.2a;C08H9.2b | VTIRGPAGDVAK             | 35  | 3316  | 0.29 | 0.23 | 80  |
| 22 C08H9.2a;C08H9.2b | NFLARGAALVK              | 27  | 1576  | 0.30 | 0.24 | 83  |
| 1 C08H9.2a;C08H9.2b  | EALLAMVPISK              | 42  | 1375  | 0.31 | 0.15 | 49  |
| 22 C08H9.2a;C08H9.2b | EALLAMVPISK              | 37  | 997   | 0.32 | 0.10 | 33  |
| 22 C08H9.2a;C08H9.2b | ETIHLLGK                 | 19  | 1305  | 0.32 | 0.22 | 67  |
| 22 C08H9.2a;C08H9.2b | AVGLLSALAK               | 58  | 2418  | 0.33 | 0.15 | 45  |
| 1 C08H9.2a;C08H9.2b  | EALLAMVPISK              | 69  | 1306  | 0.35 | 0.12 | 35  |
| 7 C08H9.2a;C08H9.2b  | AVGLLSALAK               | 63  | 1869  | 0.39 | 0.14 | 36  |
| 1 C08H9.2a;C08H9.2b  | EALLAMVPISK              | 13  | 470   | 0.39 | 0.06 | 16  |
| 1 C08H9.2a;C08H9.2b  | EALLAMVPISK              | 43  | 1046  | 0.39 | 0.16 | 41  |
| 22 C08H9.2a;C08H9.2b | VTIRGPAGDVAK             | 34  | 2243  | 0.41 | 0.15 | 37  |

|    |                   |                        |    |      |      |      |    |
|----|-------------------|------------------------|----|------|------|------|----|
| 22 | C08H9.2a;C08H9.2b | EALLAMVPISK            | 12 | 811  | 0.42 | 0.11 | 27 |
| 1  | C08H9.2a;C08H9.2b | EALLAMVPISK            | 30 | 1232 | 0.42 | 0.13 | 31 |
| 22 | C08H9.2a;C08H9.2b | NFLARGAALVK            | 16 | 736  | 0.43 | 0.18 | 42 |
| 10 | C08H9.2a;C08H9.2b | AVGLLSALAK             | 75 | 1996 | 0.43 | 0.10 | 23 |
| 22 | C08H9.2a;C08H9.2b | EALLAMVPISK            | 47 | 1112 | 0.45 | 0.20 | 45 |
| 1  | C08H9.2a;C08H9.2b | ETIHLLGK               | 27 | 872  | 0.45 | 0.29 | 64 |
| 1  | C08H9.2a;C08H9.2b | EALLAMVPISK            | 49 | 752  | 0.45 | 0.28 | 61 |
| 22 | C08H9.2a;C08H9.2b | NFLARGAALVK            | 28 | 1378 | 0.47 | 0.21 | 45 |
| 22 | C08H9.2a;C08H9.2b | EALLAMVPISK            | 49 | 1080 | 0.48 | 0.15 | 31 |
| 1  | C08H9.2a;C08H9.2b | NFLARGAALVK            | 25 | 752  | 0.48 | 0.18 | 37 |
| 22 | C08H9.2a;C08H9.2b | AVTEIRAIVTK            | 10 | 890  | 0.49 | 0.09 | 18 |
| 22 | C08H9.2a;C08H9.2b | AVGLLSALAK             | 55 | 2861 | 0.50 | 0.14 | 28 |
| 22 | C08H9.2a;C08H9.2b | AVGLLSALAK             | 64 | 1291 | 0.52 | 0.09 | 18 |
| 1  | C08H9.2a;C08H9.2b | IIGQRGATITALK          | 12 | 905  | 0.54 | 0.14 | 26 |
| 22 | C08H9.2a;C08H9.2b | AVTEIRAIVTK            | 22 | 982  | 0.56 | 0.16 | 29 |
| 1  | C08H9.2a;C08H9.2b | NRIEDVVEDYEK           | 13 | 1079 | 0.56 | 0.21 | 37 |
| 22 | C08H9.2a;C08H9.2b | EALLAMVPISK            | 14 | 956  | 0.57 | 0.21 | 36 |
| 10 | C08H9.2a;C08H9.2b | EYAENNYQQTVAIFK        | 28 | 450  | 0.58 | 0.20 | 34 |
| 7  | C08H9.2a;C08H9.2b | IIGQRGATITALK          | 12 | 1293 | 0.58 | 0.22 | 38 |
| 1  | C08H9.2a;C08H9.2b | AVGLLSALAK             | 66 | 2571 | 0.59 | 0.12 | 21 |
| 22 | C08H9.2a;C08H9.2b | GSQVQVIRDSHPNVSVVFPDAK | 12 | 5818 | 0.59 | 0.08 | 14 |
| 1  | C08H9.2a;C08H9.2b | EALLAMVPISK            | 57 | 1640 | 0.60 | 0.21 | 35 |
| 7  | C08H9.2a;C08H9.2b | ETIHLLGK               | 30 | 1884 | 0.60 | 0.08 | 13 |
| 1  | C08H9.2a;C08H9.2b | EALLAMVPISK            | 61 | 1328 | 0.61 | 0.12 | 20 |
| 10 | C08H9.2a;C08H9.2b | AVTEIRAIVTK            | 20 | 1293 | 0.62 | 0.19 | 31 |
| 22 | C08H9.2a;C08H9.2b | NFLARGAALVK            | 17 | 2063 | 0.62 | 0.14 | 22 |
| 22 | C08H9.2a;C08H9.2b | EALLAMVPISK            | 17 | 925  | 0.63 | 0.17 | 27 |
| 22 | C08H9.2a;C08H9.2b | EALLAMVPISK            | 18 | 733  | 0.64 | 0.44 | 69 |
| 22 | C08H9.2a;C08H9.2b | AVTEIRAIVTK            | 21 | 1149 | 0.64 | 0.06 | 9  |
| 7  | C08H9.2a;C08H9.2b | AVTEIRAIVTK            | 23 | 1544 | 0.65 | 0.37 | 56 |
| 22 | C08H9.2a;C08H9.2b | GSQVQVIRDSHPNVSVVFPDAK | 21 | 7819 | 0.66 | 0.16 | 24 |
| 10 | C08H9.2a;C08H9.2b | GSQVQVIRDSHPNVSVVFPDAK | 21 | 3663 | 0.67 | 0.14 | 20 |
| 22 | C08H9.2a;C08H9.2b | AVTEIRAIVTK            | 26 | 1213 | 0.67 | 0.13 | 19 |
| 22 | C08H9.2a;C08H9.2b | VTIRGPAGDVAK           | 30 | 2721 | 0.67 | 0.17 | 26 |
| 10 | C08H9.2a;C08H9.2b | VTIRGPAGDVAK           | 26 | 3246 | 0.68 | 0.14 | 21 |
| 1  | C08H9.2a;C08H9.2b | ETIHLLGK               | 16 | 1398 | 0.69 | 0.11 | 17 |
| 10 | C08H9.2a;C08H9.2b | VTIRGPAGDVAK           | 21 | 3981 | 0.69 | 0.08 | 12 |
| 22 | C08H9.2a;C08H9.2b | IQEELANVAESIEIPQK      | 41 | 1412 | 0.70 | 0.23 | 34 |
| 7  | C08H9.2a;C08H9.2b | VTIRGPAGDVAK           | 15 | 1450 | 0.70 | 0.08 | 11 |
| 1  | C08H9.2a;C08H9.2b | AVTEIRAIVTK            | 36 | 1053 | 0.71 | 0.15 | 21 |
| 22 | C08H9.2a;C08H9.2b | NFLARGAALVK            | 13 | 1066 | 0.71 | 0.22 | 31 |
| 22 | C08H9.2a;C08H9.2b | VTIRGPAGDVAK           | 30 | 2551 | 0.72 | 0.12 | 17 |
| 1  | C08H9.2a;C08H9.2b | QLSETVDIK              | 11 | 555  | 0.73 | 0.35 | 47 |
| 7  | C08H9.2a;C08H9.2b | IIGQRGATITALK          | 24 | 914  | 0.74 | 0.10 | 13 |
| 22 | C08H9.2a;C08H9.2b | ETIHLLGK               | 44 | 1928 | 0.75 | 0.12 | 16 |
| 22 | C08H9.2a;C08H9.2b | VTIRGPAGDVAK           | 26 | 1703 | 0.75 | 0.18 | 23 |
| 10 | C08H9.2a;C08H9.2b | LRDETETRIDLPESGSDDGK   | 10 | 2641 | 0.75 | 0.11 | 15 |
| 1  | C08H9.2a;C08H9.2b | LRDETETRIDLPESGSDDGK   | 11 | 1841 | 0.76 | 0.20 | 26 |
| 7  | C08H9.2a;C08H9.2b | AVTEIRAIVTK            | 23 | 1379 | 0.76 | 0.07 | 9  |
| 1  | C08H9.2a;C08H9.2b | IIGQRGATITALK          | 15 | 980  | 0.76 | 0.09 | 12 |
| 7  | C08H9.2a;C08H9.2b | IIGQRGATITALK          | 17 | 1231 | 0.76 | 0.25 | 32 |
| 22 | C08H9.2a;C08H9.2b | GSQVQVIRDSHPNVSVVFPDAK | 14 | 3631 | 0.76 | 0.10 | 13 |
| 1  | C08H9.2a;C08H9.2b | NFLARGAALVK            | 17 | 1127 | 0.77 | 0.12 | 15 |
| 22 | C08H9.2a;C08H9.2b | ETIHLLGK               | 22 | 3181 | 0.78 | 0.22 | 28 |
| 10 | C08H9.2a;C08H9.2b | IIGQRGATITALK          | 22 | 1768 | 0.78 | 0.07 | 9  |
| 1  | C08H9.2a;C08H9.2b | EALLAMVPISK            | 13 | 284  | 0.79 | 0.24 | 30 |
| 22 | C08H9.2a;C08H9.2b | VTIRGPAGDVAK           | 17 | 1746 | 0.79 | 0.14 | 18 |
| 10 | C08H9.2a;C08H9.2b | GSQVQVIRDSHPNVSVVFPDAK | 25 | 5925 | 0.80 | 0.10 | 12 |
| 22 | C08H9.2a;C08H9.2b | NRIEDVVEDYEK           | 32 | 1585 | 0.81 | 0.11 | 14 |
| 22 | C08H9.2a;C08H9.2b | QLSETVDIK              | 35 | 2714 | 0.81 | 0.09 | 11 |
| 1  | C08H9.2a;C08H9.2b | IIGQRGATITALK          | 10 | 1727 | 0.83 | 0.18 | 22 |
| 7  | C08H9.2a;C08H9.2b | IIGQRGATITALK          | 11 | 1782 | 0.84 | 0.14 | 16 |
| 7  | C08H9.2a;C08H9.2b | AVGLLSALAK             | 55 | 2519 | 0.84 | 0.08 | 9  |
| 1  | C08H9.2a;C08H9.2b | AVTEIRAIVTK            | 11 | 804  | 0.85 | 0.14 | 17 |
| 7  | C08H9.2a;C08H9.2b | VTIRGPAGDVAK           | 13 | 621  | 0.85 | 0.12 | 15 |
| 1  | C08H9.2a;C08H9.2b | EALLAMVPISK            | 46 | 1030 | 0.87 | 0.14 | 16 |
| 22 | C08H9.2a;C08H9.2b | VTIRGPAGDVAK           | 14 | 1917 | 0.87 | 0.13 | 15 |
| 1  | C08H9.2a;C08H9.2b | AVTEIRAIVTK            | 14 | 551  | 0.87 | 0.12 | 13 |
| 10 | C08H9.2a;C08H9.2b | AVGLLSALAK             | 67 | 2576 | 0.88 | 0.13 | 15 |
| 22 | C08H9.2a;C08H9.2b | AVTEIRAIVTK            | 27 | 1468 | 0.88 | 0.29 | 33 |
| 7  | C08H9.2a;C08H9.2b | IIGQRGATITALK          | 24 | 2353 | 0.88 | 0.13 | 15 |
| 22 | C08H9.2a;C08H9.2b | VTIRGPAGDVAK           | 21 | 1795 | 0.89 | 0.19 | 22 |
| 10 | C08H9.2a;C08H9.2b | QLSETVDIK              | 12 | 1246 | 0.89 | 0.12 | 14 |
| 1  | C08H9.2a;C08H9.2b | AKPEFHRFLIGK           | 26 | 2455 | 0.89 | 0.33 | 37 |
| 22 | C08H9.2a;C08H9.2b | IIGQRGATITALK          | 14 | 2329 | 0.89 | 0.12 | 13 |
| 7  | C08H9.2a;C08H9.2b | VTIRGPAGDVAK           | 23 | 1698 | 0.90 | 0.18 | 20 |
| 10 | C08H9.2a;C08H9.2b | AVGLLSALAK             | 73 | 3240 | 0.91 | 0.06 | 7  |
| 10 | C08H9.2a;C08H9.2b | NRIEDVVEDYEK           | 21 | 1953 | 0.91 | 0.17 | 19 |
| 1  | C08H9.2a;C08H9.2b | VTIRGPAGDVAK           | 27 | 2242 | 0.92 | 0.13 | 14 |
| 10 | C08H9.2a;C08H9.2b | IIGQRGATITALK          | 27 | 2177 | 0.93 | 0.17 | 18 |
| 1  | C08H9.2a;C08H9.2b | NRIEDVVEDYEK           | 36 | 1672 | 0.93 | 0.31 | 33 |
| 1  | C08H9.2a;C08H9.2b | ETIHLLGK               | 10 | 1125 | 0.94 | 0.10 | 10 |
| 22 | C08H9.2a;C08H9.2b | QLSETVDIK              | 17 | 2111 | 0.95 | 0.06 | 7  |
| 1  | C08H9.2a;C08H9.2b | NFLARGAALVK            | 10 | 745  | 0.97 | 0.22 | 23 |
| 22 | C08H9.2a;C08H9.2b | VTIRGPAGDVAK           | 30 | 4887 | 0.98 | 0.13 | 13 |
| 1  | C08H9.2a;C08H9.2b | ETIHLLGK               | 28 | 1164 | 0.99 | 0.03 | 3  |
| 10 | C08H9.2a;C08H9.2b | EALLAMVPISK            | 14 | 648  | 0.99 | 0.12 | 12 |
| 22 | C08H9.2a;C08H9.2b | NFLARGAALVK            | 23 | 1517 | 0.99 | 0.18 | 18 |
| 7  | C08H9.2a;C08H9.2b | AVGLLSALAK             | 47 | 1953 | 1.00 | 0.14 | 14 |
| 22 | C08H9.2a;C08H9.2b | AVGLLSALAK             | 61 | 2777 | 1.01 | 0.11 | 11 |
| 1  | C08H9.2a;C08H9.2b | VTIRGPAGDVAK           | 34 | 1662 | 1.01 | 0.11 | 11 |
| 22 | C08H9.2a;C08H9.2b | EALLAMVPISK            | 12 | 829  | 1.02 | 0.07 | 7  |
| 7  | C08H9.2a;C08H9.2b | NFLARGAALVK            | 25 | 1521 | 1.03 | 0.20 | 19 |
| 22 | C08H9.2a;C08H9.2b | IIGQRGATITALK          | 17 | 2466 | 1.03 | 0.10 | 10 |
| 22 | C08H9.2a;C08H9.2b | IIGQRGATITALK          | 11 | 1299 | 1.04 | 0.09 | 9  |
| 10 | C08H9.2a;C08H9.2b | AVTEIRAIVTK            | 28 | 1271 | 1.04 | 0.06 | 6  |
| 1  | C08H9.2a;C08H9.2b | ETIHLLGK               | 32 | 1104 | 1.05 | 0.24 | 23 |
| 10 | C08H9.2a;C08H9.2b | EALLAMVPISK            | 38 | 1251 | 1.05 | 0.10 | 10 |
| 22 | C08H9.2a;C08H9.2b | VTIRGPAGDVAK           | 27 | 4145 | 1.05 | 0.23 | 22 |
| 22 | C08H9.2a;C08H9.2b | EALLAMVPISK            | 30 | 1396 | 1.05 | 0.13 | 12 |
| 7  | C08H9.2a;C08H9.2b | VTIRGPAGDVAK           | 15 | 1850 | 1.06 | 0.12 | 11 |

|    |                   |                        |    |       |      |      |    |
|----|-------------------|------------------------|----|-------|------|------|----|
| 1  | C08H9.2a;C08H9.2b | LMQDYDVNISIPK          | 15 | 467   | 1.06 | 0.14 | 13 |
| 22 | C08H9.2a;C08H9.2b | GSGVQVIRDSHPNVSVVFPDAK | 22 | 4614  | 1.10 | 0.16 | 15 |
| 7  | C08H9.2a;C08H9.2b | GSGVQVIRDSHPNVSVVFPDAK | 29 | 4281  | 1.11 | 0.21 | 19 |
| 10 | C08H9.2a;C08H9.2b | AVTEIRAIVTK            | 11 | 1356  | 1.11 | 0.14 | 13 |
| 10 | C08H9.2a;C08H9.2b | GSGVQVIRDSHPNVSVVFPDAK | 14 | 5178  | 1.12 | 0.17 | 15 |
| 22 | C08H9.2a;C08H9.2b | NFLARGAALVK            | 13 | 1312  | 1.13 | 0.27 | 24 |
| 10 | C08H9.2a;C08H9.2b | IIGQRGATITALK          | 29 | 2461  | 1.16 | 0.13 | 11 |
| 1  | C08H9.2a;C08H9.2b | GSGVQVIRDSHPNVSVVFPDAK | 32 | 6178  | 1.16 | 0.03 | 2  |
| 1  | C08H9.2a;C08H9.2b | VTIRGPAGDVAK           | 28 | 1137  | 1.18 | 0.10 | 9  |
| 1  | C08H9.2a;C08H9.2b | IIGQRGATITALK          | 14 | 769   | 1.18 | 0.19 | 16 |
| 7  | C08H9.2a;C08H9.2b | NFLARGAALVK            | 11 | 909   | 1.20 | 0.16 | 13 |
| 7  | C08H9.2a;C08H9.2b | VTIRGPAGDVAK           | 12 | 2215  | 1.23 | 0.10 | 8  |
| 22 | C08H9.2a;C08H9.2b | AVGLLSALAK             | 65 | 3404  | 1.24 | 0.17 | 13 |
| 22 | C08H9.2a;C08H9.2b | AVTEIRAIVTK            | 26 | 1243  | 1.24 | 0.20 | 16 |
| 7  | C08H9.2a;C08H9.2b | IIGQRGATITALK          | 16 | 2022  | 1.25 | 0.16 | 13 |
| 22 | C08H9.2a;C08H9.2b | IIGQRGATITALK          | 17 | 2254  | 1.26 | 0.17 | 14 |
| 1  | C08H9.2a;C08H9.2b | GSGVQVIRDSHPNVSVVFPDAK | 16 | 2686  | 1.26 | 0.21 | 17 |
| 10 | C08H9.2a;C08H9.2b | IIGQRGATITALK          | 13 | 967   | 1.27 | 0.16 | 13 |
| 7  | C08H9.2a;C08H9.2b | NFLARGAALVK            | 26 | 1528  | 1.28 | 0.14 | 11 |
| 10 | C08H9.2a;C08H9.2b | IIGQRGATITALK          | 19 | 1945  | 1.28 | 0.17 | 13 |
| 10 | C08H9.2a;C08H9.2b | EALLAMVPISK            | 18 | 633   | 1.29 | 0.08 | 6  |
| 10 | C08H9.2a;C08H9.2b | IIGQRGATITALK          | 13 | 1981  | 1.29 | 0.21 | 16 |
| 1  | C08H9.2a;C08H9.2b | GSGVQVIRDSHPNVSVVFPDAK | 22 | 6164  | 1.30 | 0.16 | 12 |
| 10 | C08H9.2a;C08H9.2b | IIGQRGATITALK          | 16 | 1438  | 1.33 | 0.19 | 14 |
| 10 | C08H9.2a;C08H9.2b | EALLAMVPISK            | 14 | 511   | 1.33 | 0.10 | 7  |
| 10 | C08H9.2a;C08H9.2b | EALLAMVPISK            | 39 | 1477  | 1.33 | 0.18 | 13 |
| 22 | C08H9.2a;C08H9.2b | NFLARGAALVK            | 12 | 762   | 1.34 | 0.18 | 13 |
| 7  | C08H9.2a;C08H9.2b | IIGQRGATITALK          | 19 | 2366  | 1.34 | 0.18 | 14 |
| 10 | C08H9.2a;C08H9.2b | NFLARGAALVK            | 23 | 2619  | 1.40 | 0.14 | 10 |
| 10 | C08H9.2a;C08H9.2b | ETIHLLGK               | 32 | 1240  | 1.41 | 0.14 | 10 |
| 10 | C08H9.2a;C08H9.2b | NFLARGAALVK            | 59 | 1790  | 1.42 | 0.14 | 10 |
| 7  | C08H9.2a;C08H9.2b | VTIRGPAGDVAK           | 29 | 1818  | 1.42 | 0.07 | 5  |
| 10 | C08H9.2a;C08H9.2b | VTIRGPAGDVAK           | 17 | 1972  | 1.44 | 0.12 | 8  |
| 22 | C08H9.2a;C08H9.2b | NFLARGAALVK            | 23 | 1617  | 1.51 | 0.17 | 11 |
| 10 | C08H9.2a;C08H9.2b | NRIEDVVEDYEK           | 11 | 1935  | 1.51 | 0.08 | 5  |
| 7  | C08H9.2a;C08H9.2b | EALLAMVPISK            | 21 | 678   | 1.53 | 0.16 | 10 |
| 10 | C08H9.2a;C08H9.2b | NFLARGAALVK            | 38 | 1048  | 1.53 | 0.18 | 12 |
| 10 | C08H9.2a;C08H9.2b | VTIRGPAGDVAK           | 20 | 2050  | 1.55 | 0.20 | 13 |
| 1  | C08H9.2a;C08H9.2b | EALLAMVPISK            | 31 | 942   | 1.57 | 0.17 | 11 |
| 7  | C08H9.2a;C08H9.2b | IIGQRGATITALK          | 17 | 2192  | 1.58 | 0.11 | 7  |
| 1  | C08H9.2a;C08H9.2b | EALLAMVPISK            | 30 | 715   | 1.58 | 0.08 | 5  |
| 7  | C08H9.2a;C08H9.2b | VTIRGPAGDVAK           | 32 | 3919  | 1.60 | 0.15 | 10 |
| 1  | C08H9.2a;C08H9.2b | EALLAMVPISK            | 19 | 492   | 1.62 | 0.12 | 7  |
| 1  | C08H9.2a;C08H9.2b | EALLAMVPISK            | 37 | 889   | 1.63 | 0.15 | 9  |
| 1  | C08H9.2a;C08H9.2b | GSGVQVIRDSHPNVSVVFPDAK | 24 | 4345  | 1.64 | 0.14 | 9  |
| 10 | C08H9.2a;C08H9.2b | AVGLLSALAK             | 61 | 1596  | 1.65 | 0.14 | 9  |
| 7  | C08H9.2a;C08H9.2b | AVTEIRAIVTK            | 27 | 1327  | 1.65 | 0.06 | 4  |
| 10 | C08H9.2a;C08H9.2b | AVTEIRAIVTK            | 21 | 760   | 1.67 | 0.16 | 10 |
| 7  | C08H9.2a;C08H9.2b | NFLARGAALVK            | 53 | 3534  | 1.67 | 0.15 | 9  |
| 10 | C08H9.2a;C08H9.2b | NFLARGAALVK            | 36 | 1338  | 1.70 | 0.19 | 11 |
| 1  | C08H9.2a;C08H9.2b | VTIRGPAGDVAK           | 15 | 741   | 1.76 | 0.15 | 9  |
| 7  | C08H9.2a;C08H9.2b | NFLARGAALVK            | 25 | 2723  | 1.76 | 0.14 | 8  |
| 7  | C08H9.2a;C08H9.2b | NFLARGAALVK            | 42 | 2490  | 1.77 | 0.23 | 13 |
| 10 | C08H9.2a;C08H9.2b | NFLARGAALVK            | 55 | 1243  | 1.81 | 0.21 | 12 |
| 10 | C08H9.2a;C08H9.2b | IIGQRGATITALK          | 13 | 1560  | 1.85 | 0.13 | 7  |
| 10 | C08H9.2a;C08H9.2b | VTIRGPAGDVAK           | 23 | 1736  | 1.89 | 0.07 | 4  |
| 10 | C08H9.2a;C08H9.2b | NFLARGAALVK            | 33 | 1975  | 1.90 | 0.29 | 15 |
| 7  | C08H9.2a;C08H9.2b | AVTEIRAIVTK            | 17 | 1259  | 1.91 | 0.10 | 5  |
| 1  | C08H9.2a;C08H9.2b | LRDETETRIDLPESGSDDGK   | 18 | 1228  | 1.94 | 0.11 | 6  |
| 10 | C08H9.2a;C08H9.2b | IIGQRGATITALK          | 12 | 2163  | 1.95 | 0.22 | 12 |
| 10 | C08H9.2a;C08H9.2b | NFLARGAALVK            | 13 | 1880  | 2.08 | 0.12 | 6  |
| 1  | C08H9.2a;C08H9.2b | NFLARGAALVK            | 13 | 341   | 2.09 | 0.10 | 5  |
| 22 | C08H9.2a;C08H9.2b | EALLAMVPISK            | 17 | 1172  | 2.11 | 0.31 | 15 |
| 1  | C08H9.2a;C08H9.2b | EALLAMVPISK            | 27 | 647   | 2.12 | 0.21 | 10 |
| 10 | C08H9.2a;C08H9.2b | VTIRGPAGDVAK           | 31 | 2816  | 2.14 | 0.18 | 8  |
| 7  | C08H9.2a;C08H9.2b | NFLARGAALVK            | 15 | 1129  | 2.16 | 0.28 | 13 |
| 10 | C08H9.2a;C08H9.2b | VTIRGPAGDVAK           | 15 | 1527  | 2.25 | 0.12 | 5  |
| 22 | C08H9.2a;C08H9.2b | EALLAMVPISK            | 22 | 852   | 2.31 | 0.18 | 8  |
| 10 | C08H9.2a;C08H9.2b | VTIRGPAGDVAK           | 24 | 2437  | 2.32 | 0.19 | 8  |
| 10 | C08H9.2a;C08H9.2b | GSGVQVIRDSHPNVSVVFPDAK | 23 | 4124  | 2.34 | 0.29 | 12 |
| 22 | C08H9.2a;C08H9.2b | ETIHLLGK               | 36 | 3108  | 2.39 | 0.16 | 7  |
| 1  | C08H9.2a;C08H9.2b | SRDIIIPQRLHK           | 12 | 2643  | 2.40 | 0.36 | 15 |
| 10 | C08H9.2a;C08H9.2b | NFLARGAALVK            | 30 | 1395  | 2.41 | 0.30 | 12 |
| 1  | C08H9.2a;C08H9.2b | IIGQRGATITALK          | 31 | 1167  | 2.48 | 0.13 | 5  |
| 22 | C08H9.2a;C08H9.2b | AVTEIRAIVTK            | 35 | 1681  | 2.50 | 0.06 | 3  |
| 7  | C08H9.2a;C08H9.2b | NRIEDVVEDYEK           | 14 | 924   | 2.50 | 0.15 | 6  |
| 1  | C08H9.2a;C08H9.2b | VTIRGPAGDVAK           | 11 | 771   | 2.52 | 0.15 | 6  |
| 10 | C08H9.2a;C08H9.2b | NFLARGAALVK            | 28 | 1374  | 2.53 | 0.19 | 7  |
| 22 | C08H9.2a;C08H9.2b | ETIHLLGK               | 24 | 2614  | 2.53 | 0.23 | 9  |
| 10 | C08H9.2a;C08H9.2b | NFLARGAALVK            | 33 | 1515  | 2.58 | 0.17 | 7  |
| 22 | C08H9.2a;C08H9.2b | EALLAMVPISK            | 17 | 833   | 2.59 | 0.29 | 11 |
| 22 | C08H9.2a;C08H9.2b | EALLAMVPISK            | 32 | 1111  | 2.61 | 0.28 | 11 |
| 22 | C08H9.2a;C08H9.2b | NFLARGAALVK            | 19 | 1339  | 2.65 | 0.13 | 5  |
| 10 | C08H9.2a;C08H9.2b | NFLARGAALVK            | 33 | 543   | 2.69 | 0.19 | 7  |
| 1  | C08H9.2a;C08H9.2b | IQEELANVAEESIEIPQK     | 16 | 855   | 2.84 | 0.30 | 11 |
| 7  | C08H9.2a;C08H9.2b | NFLARGAALVK            | 37 | 728   | 2.85 | 0.11 | 4  |
| 22 | C08H9.2a;C08H9.2b | NFLARGAALVK            | 50 | 2859  | 2.89 | 0.16 | 5  |
| 22 | C08H9.2a;C08H9.2b | IIGQRGATITALK          | 34 | 2605  | 2.89 | 0.20 | 7  |
| 7  | C08H9.2a;C08H9.2b | AVTEIRAIVTK            | 14 | 853   | 2.97 | 0.22 | 7  |
| 7  | C08H9.2a;C08H9.2b | AVTEIRAIVTK            | 15 | 960   | 2.99 | 0.13 | 4  |
| 7  | C08H9.2a;C08H9.2b | IIGQRGATITALK          | 24 | 1158  | 3.14 | 0.20 | 6  |
| 10 | C08H9.2a;C08H9.2b | SRDIIIPQRLHK           | 11 | 4371  | 3.18 | 0.24 | 7  |
| 22 | C08H9.2a;C08H9.2b | IIGQRGATITALK          | 42 | 3131  | 3.20 | 0.10 | 3  |
| 22 | C08H9.2a;C08H9.2b | VTIRGPAGDVAK           | 27 | 1665  | 3.25 | 0.14 | 4  |
| 22 | C08H9.2a;C08H9.2b | EALLAMVPISK            | 25 | 1064  | 3.41 | 0.22 | 6  |
| 1  | C08H9.2a;C08H9.2b | EALLAMVPISK            | 41 | 684   | 3.49 | 0.15 | 4  |
| 22 | C08H9.2a;C08H9.2b | GSGVQVIRDSHPNVSVVFPDAK | 40 | 9028  | 3.63 | 0.13 | 4  |
| 1  | C08H9.2a;C08H9.2b | HLIGPK                 | 13 | 1926  | 3.71 | 0.06 | 2  |
| 22 | C08H9.2a;C08H9.2b | NFLARGAALVK            | 61 | 2734  | 3.95 | 0.18 | 5  |
| 22 | C08H9.2a;C08H9.2b | GSGVQVIRDSHPNVSVVFPDAK | 39 | 14021 | 4.00 | 0.14 | 3  |
| 1  | C08H9.2a;C08H9.2b | EALLAMVPISK            | 39 | 604   | 4.34 | 0.07 | 2  |

|                                                 |                        |    |       |      |      |     |
|-------------------------------------------------|------------------------|----|-------|------|------|-----|
| 1 C08H9.2a;C08H9.2b                             | HLIGPK                 | 17 | 1573  | 4.47 | 0.05 | 1   |
| 22 C08H9.2a;C08H9.2b                            | EALLAMVPISK            | 21 | 1003  | 4.55 | 0.23 | 5   |
| 22 C08H9.2a;C08H9.2b                            | EALLAMVPISK            | 22 | 1249  | 4.63 | 0.23 | 5   |
| 22 C08H9.2a;C08H9.2b                            | AVGLLSALAK             | 81 | 4419  | 4.99 | 0.14 | 3   |
| 22 C08H9.2a;C08H9.2b                            | GSGVQVIRDSHPNVSVVFPDAK | 18 | 4482  | 5.06 | 0.21 | 4   |
| 7 C08H9.2a;C08H9.2b                             | NFLARGAALVK            | 25 | 644   | 5.55 | 0.28 | 5   |
| 1 C08H9.2a;C08H9.2b                             | IQEELANVAEESIEIPQK     | 32 | 645   | 5.70 | 0.38 | 7   |
| 1 C08H9.2a;C08H9.2b                             | EALLAMVPISK            | 27 | 665   | 5.84 | 0.22 | 4   |
| 22 C08H9.2a;C08H9.2b                            | AVGLLSALAK             | 52 | 3407  | 6.10 | 0.24 | 4   |
| 10 C09D1.1b;C09D1.1g;C09D1.1a;C09D1.1c;C09D1.1d | ELSAIQVK               | 20 | 574   | 0.42 | 0.24 | 57  |
| 10 C09D1.1b;C09D1.1g;C09D1.1a;C09D1.1c;C09D1.1d | MDQGSPPGVK             | 12 | 3343  | 0.74 | 0.14 | 19  |
| 22 C09D1.1b;C09D1.1g;C09D1.1a;C09D1.1c;C09D1.1d | GEVYSGSVVHVK           | 43 | 1185  | 1.09 | 0.12 | 11  |
| 10 C09D1.1b;C09D1.1g;C09D1.1a;C09D1.1c;C09D1.1d | GEVYSGSVVHVK           | 29 | 1444  | 1.26 | 0.10 | 8   |
| 22 C09D1.1b;C09D1.1g;C09D1.1a;C09D1.1c;C09D1.1d | QGETATFNVK             | 10 | 805   | 1.35 | 0.12 | 9   |
| 22 C09D1.1b;C09D1.1g;C09D1.1a;C09D1.1c;C09D1.1d | KPEFTDK                | 13 | 3276  | 1.50 | 0.62 | 41  |
| 22 C09D1.1b;C09D1.1g;C09D1.1a;C09D1.1c;C09D1.1d | MDQGSPPGVK             | 12 | 1837  | 1.78 | 0.21 | 12  |
| 22 C09D1.1b;C09D1.1g;C09D1.1a;C09D1.1c;C09D1.1d | ELSAIQVK               | 19 | 551   | 1.89 | 0.34 | 18  |
| 1 C09D4.5                                       | RAELLRK                | 14 | 20001 | 0.63 | 0.05 | 7   |
| 1 C09D4.5                                       | NLIEYIFK               | 14 | 482   | 0.74 | 0.17 | 22  |
| 1 C09D4.5                                       | RAELLRK                | 26 | 3311  | 0.99 | 0.22 | 22  |
| 10 C09D4.5                                      | RLASAVLK               | 48 | 16114 | 1.05 | 0.05 | 4   |
| 22 C09D4.5                                      | HLYHELYLRAK            | 13 | 51972 | 1.30 | 0.19 | 14  |
| 22 C09D4.5                                      | HLYHELYLRAK            | 11 | 40872 | 1.71 | 0.21 | 13  |
| 22 C09D4.5                                      | HLYHELYLRAK            | 12 | 28797 | 1.89 | 0.18 | 10  |
| 22 C09D4.5                                      | RLASAVLK               | 44 | 35418 | 1.91 | 0.09 | 5   |
| 10 C09D4.5                                      | HLYHELYLRAK            | 12 | 62658 | 1.91 | 0.07 | 4   |
| 10 C09D4.5                                      | HLYHELYLRAK            | 15 | 8164  | 2.45 | 0.30 | 12  |
| 7 C09D4.5                                       | RAELLRK                | 10 | 2793  | 2.63 | 0.08 | 3   |
| 10 C09D4.5                                      | HLYHELYLRAK            | 10 | 3941  | 2.91 | 0.17 | 6   |
| 10 C09D4.5                                      | RAELLRK                | 10 | 4695  | 3.33 | 0.12 | 4   |
| 7 C09E7.7;F27B3.5                               | MVMRSELFK              | 11 | 1948  | 0.87 | 0.12 | 14  |
| 22 C11D2.4                                      | EALFLSPELHPK           | 39 | 6648  | 0.39 | 0.45 | 116 |
| 22 C11D2.4                                      | EALFLSPELHPK           | 42 | 3932  | 0.46 | 0.16 | 33  |
| 7 C11D2.4                                       | FIVEHGNNLVK            | 35 | 4368  | 0.69 | 0.12 | 18  |
| 7 C11D2.4                                       | FIVEHGNNLVK            | 39 | 4239  | 0.73 | 0.13 | 18  |
| 7 C11D2.4                                       | EALFLSPELHPK           | 50 | 5091  | 0.75 | 0.12 | 16  |
| 10 C11D2.4                                      | EALFLSPELHPK           | 57 | 8241  | 0.75 | 0.10 | 13  |
| 22 C11D2.4                                      | SDSGHSIPLDDRDK         | 19 | 2857  | 0.80 | 0.19 | 24  |
| 7 C11D2.4                                       | FIVEHGNNLVK            | 33 | 3162  | 0.81 | 0.20 | 25  |
| 10 C11D2.4                                      | EALFLSPELHPK           | 46 | 8283  | 0.81 | 0.11 | 14  |
| 22 C11D2.4                                      | SDSGHSIPLDDRDK         | 12 | 2421  | 0.96 | 0.12 | 13  |
| 22 C11D2.4                                      | EALFLSPELHPK           | 55 | 6276  | 0.99 | 0.11 | 11  |
| 10 C11D2.4                                      | VAEHILGAAK             | 50 | 18220 | 1.04 | 0.14 | 14  |
| 22 C11D2.4                                      | EALFLSPELHPK           | 48 | 5467  | 1.05 | 0.15 | 14  |
| 10 C11D2.4                                      | VAEHILGAAK             | 41 | 16149 | 1.13 | 0.12 | 11  |
| 22 C11D2.4                                      | VAEHILGAAK             | 40 | 18535 | 1.22 | 0.11 | 9   |
| 22 C11D2.4                                      | VAEHILGAAK             | 48 | 18047 | 1.22 | 0.18 | 15  |
| 7 C11D2.4                                       | EALFLSPELHPK           | 46 | 3474  | 1.28 | 0.10 | 8   |
| 10 C11D2.4                                      | FIVEHGNNLVK            | 20 | 759   | 1.30 | 0.12 | 10  |
| 22 C11D2.4                                      | FIVEHGNNLVK            | 43 | 1428  | 1.37 | 0.12 | 9   |
| 10 C11D2.4                                      | FIVEHGNNLVK            | 41 | 2095  | 1.43 | 0.10 | 7   |
| 1 C11D2.4;F28G4.4                               | VAEHILGAAK             | 41 | 1362  | 0.17 | 0.55 | 319 |
| 22 C12C8.2a                                     | VERVFYPGLPSHPQHQQYAK   | 11 | 19085 | 0.84 | 0.40 | 47  |
| 10 C12D8.11                                     | EEQSRALNLVEAYLK        | 32 | 931   | 0.44 | 0.12 | 28  |
| 22 C12D8.11                                     | MTVVVGALDEK            | 22 | 3333  | 0.47 | 0.15 | 33  |
| 1 C12D8.11                                      | RVDNIVK                | 27 | 3246  | 0.51 | 0.32 | 64  |
| 1 C12D8.11                                      | HGLVREHLPTTSLNSK       | 18 | 3722  | 0.58 | 0.45 | 77  |
| 22 C12D8.11                                     | EEQSRALNLVEAYLK        | 23 | 1249  | 0.58 | 0.19 | 32  |
| 1 C12D8.11                                      | MTVVVGALDEK            | 16 | 1438  | 0.59 | 0.16 | 27  |
| 1 C12D8.11                                      | RVDNIVK                | 28 | 4257  | 0.60 | 0.18 | 30  |
| 1 C12D8.11                                      | MTVVVGALDEK            | 44 | 2073  | 0.62 | 0.08 | 13  |
| 22 C12D8.11                                     | EEQSRALNLVEAYLK        | 32 | 1236  | 0.64 | 0.09 | 14  |
| 1 C12D8.11                                      | ELALINAENRNPK          | 55 | 1322  | 0.66 | 0.16 | 25  |
| 10 C12D8.11                                     | NEQSEEVIVAAIK          | 64 | 2250  | 0.66 | 0.12 | 18  |
| 1 C12D8.11                                      | MTVVVGALDEK            | 27 | 1514  | 0.70 | 0.26 | 38  |
| 1 C12D8.11                                      | ITIDNAQRIIK            | 25 | 2536  | 0.70 | 0.11 | 15  |
| 10 C12D8.11                                     | IIEQGNNGHMLK           | 34 | 2595  | 0.71 | 0.15 | 21  |
| 10 C12D8.11                                     | IIEQGNNGHMLK           | 36 | 2474  | 0.72 | 0.10 | 13  |
| 10 C12D8.11                                     | NEQSEEVIVAAIK          | 57 | 2684  | 0.80 | 0.08 | 10  |
| 10 C12D8.11                                     | ITIDNAQRIIK            | 18 | 4870  | 0.82 | 0.09 | 12  |
| 22 C12D8.11                                     | EEQSRALNLVEAYLK        | 21 | 1453  | 0.84 | 0.16 | 18  |
| 10 C12D8.11                                     | NEQSEEVIVAAIK          | 64 | 3580  | 0.88 | 0.15 | 17  |
| 10 C12D8.11                                     | ITIDNAQRIIK            | 14 | 4154  | 0.88 | 0.10 | 11  |
| 22 C12D8.11                                     | MTVVVGALDEK            | 17 | 4786  | 0.90 | 0.08 | 9   |
| 10 C12D8.11                                     | MTVVVGALDEK            | 11 | 3430  | 0.90 | 0.04 | 4   |
| 22 C12D8.11                                     | EEQSRALNLVEAYLK        | 20 | 1632  | 0.91 | 0.12 | 14  |
| 10 C12D8.11                                     | ELALINAENRNPK          | 35 | 3323  | 0.92 | 0.12 | 13  |
| 22 C12D8.11                                     | EEQSRALNLVEAYLK        | 13 | 790   | 0.95 | 0.21 | 22  |
| 22 C12D8.11                                     | NEQSEEVIVAAIK          | 71 | 3955  | 0.95 | 0.06 | 6   |
| 10 C12D8.11                                     | NEQSEEVIVAAIK          | 53 | 2663  | 0.96 | 0.08 | 9   |
| 22 C12D8.11                                     | AFVNPPTGK              | 15 | 2952  | 0.97 | 0.07 | 8   |
| 10 C12D8.11                                     | RVDNIVK                | 15 | 5768  | 0.97 | 0.14 | 14  |
| 10 C12D8.11                                     | RVDNIVK                | 41 | 7153  | 0.99 | 0.11 | 11  |
| 10 C12D8.11                                     | LTELPFTK               | 11 | 1545  | 1.02 | 0.15 | 15  |
| 1 C12D8.11                                      | HGLVREHLPTTSLNSK       | 20 | 5069  | 1.05 | 0.18 | 17  |
| 22 C12D8.11                                     | NEQSEEVIVAAIK          | 71 | 2720  | 1.05 | 0.15 | 15  |
| 22 C12D8.11                                     | IIEQGNNGHMLK           | 18 | 2199  | 1.13 | 0.13 | 12  |
| 10 C12D8.11                                     | MTVVVGALDEK            | 23 | 5659  | 1.14 | 0.06 | 5   |
| 22 C12D8.11                                     | ITIDNAQRIIK            | 38 | 7526  | 1.18 | 0.12 | 10  |
| 7 C12D8.11                                      | RVDNIVK                | 15 | 1160  | 1.20 | 0.47 | 39  |
| 10 C12D8.11                                     | LTELPFTK               | 10 | 1571  | 1.21 | 0.09 | 7   |
| 1 C12D8.11                                      | ITIDNAQRIIK            | 24 | 2915  | 1.26 | 0.19 | 15  |
| 10 C12D8.11                                     | MTVVVGALDEK            | 17 | 5517  | 1.37 | 0.03 | 2   |
| 22 C12D8.11                                     | RVDNIVK                | 20 | 7367  | 1.40 | 0.10 | 7   |
| 22 C12D8.11                                     | ITIDNAQRIIK            | 17 | 4812  | 1.43 | 0.12 | 9   |
| 22 C12D8.11                                     | ITIDNAQRIIK            | 23 | 6465  | 1.59 | 0.20 | 12  |
| 22 C12D8.11                                     | HGLVREHLPTTSLNSK       | 12 | 9788  | 2.04 | 0.14 | 7   |
| 22 C12D8.11                                     | HGLVREHLPTTSLNSK       | 11 | 11828 | 2.43 | 0.17 | 7   |
| 22 C12D8.11                                     | MTVVVGALDEK            | 20 | 3342  | 2.65 | 0.24 | 9   |
| 10 C13B4.2                                      | AQLFALTQVVPERQK        | 25 | 1812  | 0.17 | 0.19 | 110 |
| 10 C13B4.2                                      | AQLFALTQVVPERQK        | 12 | 1662  | 0.25 | 0.12 | 47  |

|             |                       |     |       |      |      |     |
|-------------|-----------------------|-----|-------|------|------|-----|
| 22 C13B4.2  | AQLFALTQVVPERQK       | 33  | 3736  | 0.31 | 0.15 | 48  |
| 10 C13B4.2  | NTQISRLPK             | 21  | 7722  | 0.45 | 0.17 | 39  |
| 22 C13B4.2  | AQLFALTQVVPERQK       | 33  | 2882  | 0.51 | 0.03 | 5   |
| 10 C14A4.1  | HAIPTLVSVLEDEK        | 13  | 4231  | 1.13 | 0.07 | 6   |
| 10 C14A4.1  | HAIPTLVSVLEDEK        | 32  | 4947  | 1.27 | 0.11 | 9   |
| 22 C14A4.1  | HAIPTLVSVLEDEK        | 30  | 4902  | 1.48 | 0.10 | 7   |
| 7 C14A4.1   | HAIPTLVSVLEDEK        | 16  | 3184  | 1.85 | 0.19 | 10  |
| 22 C14A4.14 | LLTDLTEIDLEHK         | 77  | 1023  | 0.62 | 0.37 | 59  |
| 22 C14B1.1  | FKPQEGEDFEFTNSYLEGK   | 37  | 4486  | 0.13 | 0.41 | 311 |
| 7 C14B1.1   | LSAVTEFTHESAQEIVGGDLK | 44  | 3872  | 0.27 | 0.53 | 196 |
| 10 C14B1.1  | SDSSFDETIK            | 36  | 3448  | 0.32 | 0.20 | 63  |
| 10 C14B1.1  | AQDLPEDWNALPVK        | 37  | 2059  | 0.34 | 0.22 | 66  |
| 7 C14B1.1   | LDATLNELADVK          | 73  | 2160  | 0.34 | 0.24 | 69  |
| 7 C14B1.1   | FEVRGYPTILYFK         | 37  | 4248  | 0.35 | 0.15 | 43  |
| 22 C14B1.1  | AQDLPEDWNALPVK        | 13  | 1032  | 0.36 | 0.17 | 48  |
| 10 C14B1.1  | LSAVTEFTHESAQEIVGGDLK | 31  | 5142  | 0.40 | 0.12 | 31  |
| 10 C14B1.1  | QLVPVWDELAEK          | 12  | 1688  | 0.40 | 0.11 | 27  |
| 7 C14B1.1   | FHFLIRK               | 20  | 3779  | 0.41 | 0.16 | 40  |
| 10 C14B1.1  | LSAVTEFTHESAQEIVGGDLK | 31  | 4447  | 0.42 | 0.14 | 34  |
| 7 C14B1.1   | LDATLNELADVK          | 58  | 1550  | 0.43 | 0.16 | 37  |
| 10 C14B1.1  | VDATENQALASK          | 25  | 1261  | 0.44 | 0.19 | 45  |
| 10 C14B1.1  | VDATENQALASK          | 38  | 2266  | 0.45 | 0.11 | 25  |
| 22 C14B1.1  | VLVASNFNEIALDETK      | 99  | 2986  | 0.45 | 0.13 | 29  |
| 22 C14B1.1  | FEVRGYPTILYFK         | 43  | 5037  | 0.45 | 0.08 | 17  |
| 22 C14B1.1  | LDATLNELADVK          | 33  | 684   | 0.46 | 0.11 | 23  |
| 10 C14B1.1  | YESNPNVVIK            | 49  | 4140  | 0.46 | 0.11 | 23  |
| 10 C14B1.1  | YDEAADLLK             | 26  | 1556  | 0.48 | 0.17 | 36  |
| 7 C14B1.1   | AQDLPEDWNALPVK        | 11  | 1268  | 0.48 | 0.15 | 30  |
| 10 C14B1.1  | FEFVNK                | 24  | 1327  | 0.49 | 0.22 | 45  |
| 10 C14B1.1  | AQDLPEDWNALPVK        | 38  | 2367  | 0.50 | 0.23 | 45  |
| 22 C14B1.1  | VLVASNFNEIALDETK      | 102 | 2477  | 0.50 | 0.17 | 33  |
| 1 C14B1.1   | YDEAADLLK             | 14  | 682   | 0.50 | 0.14 | 28  |
| 7 C14B1.1   | YTGGRATAQIVDWVK       | 25  | 6916  | 0.51 | 0.19 | 38  |
| 7 C14B1.1   | FEVRGYPTILYFK         | 47  | 2657  | 0.51 | 0.23 | 46  |
| 22 C14B1.1  | YESNPNVVIK            | 48  | 3427  | 0.52 | 0.22 | 42  |
| 7 C14B1.1   | FEFVNK                | 34  | 10759 | 0.53 | 0.13 | 24  |
| 22 C14B1.1  | FKPQEGEDFEFTNSYLEGK   | 58  | 3911  | 0.53 | 0.09 | 16  |
| 10 C14B1.1  | NTPANRIVSLADQVEK      | 39  | 2498  | 0.53 | 0.12 | 22  |
| 22 C14B1.1  | AQDLPEDWNALPVK        | 14  | 1431  | 0.54 | 0.12 | 23  |
| 1 C14B1.1   | YDEAADLLK             | 18  | 896   | 0.54 | 0.09 | 16  |
| 22 C14B1.1  | FEVRGYPTILYFK         | 41  | 5386  | 0.54 | 0.12 | 22  |
| 7 C14B1.1   | NTPANRIVSLADQVEK      | 49  | 2221  | 0.55 | 0.12 | 22  |
| 7 C14B1.1   | FHFLIRK               | 21  | 3336  | 0.55 | 0.33 | 59  |
| 7 C14B1.1   | VDATENQALASK          | 52  | 4785  | 0.56 | 0.10 | 18  |
| 10 C14B1.1  | LDATLNELADVK          | 64  | 1117  | 0.56 | 0.08 | 14  |
| 7 C14B1.1   | SGPTVTTVESVEQLEELK    | 103 | 4918  | 0.58 | 0.14 | 25  |
| 7 C14B1.1   | FEFVNK                | 24  | 4272  | 0.58 | 0.10 | 17  |
| 22 C14B1.1  | LDATLNELADVK          | 52  | 1239  | 0.58 | 0.17 | 29  |
| 10 C14B1.1  | YESNPNVVIK            | 13  | 585   | 0.58 | 0.16 | 28  |
| 7 C14B1.1   | YTGGRATAQIVDWVK       | 30  | 4674  | 0.58 | 0.16 | 27  |
| 1 C14B1.1   | YTGGRATAQIVDWVK       | 27  | 1593  | 0.58 | 0.24 | 41  |
| 10 C14B1.1  | LDATLNELADVK          | 68  | 1403  | 0.60 | 0.09 | 14  |
| 22 C14B1.1  | LDATLNELADVK          | 40  | 705   | 0.60 | 0.09 | 15  |
| 22 C14B1.1  | FKPQEGEDFEFTNSYLEGK   | 65  | 26735 | 0.61 | 0.51 | 85  |
| 7 C14B1.1   | QLVPVWDELAEK          | 10  | 1823  | 0.61 | 0.07 | 11  |
| 7 C14B1.1   | NTPANRIVSLADQVEK      | 25  | 1698  | 0.62 | 0.16 | 26  |
| 22 C14B1.1  | VDATENQALASK          | 27  | 1566  | 0.63 | 0.10 | 16  |
| 7 C14B1.1   | SGPTVTTVESVEQLEELK    | 103 | 4028  | 0.63 | 0.14 | 23  |
| 22 C14B1.1  | YESNPNVVIK            | 64  | 5359  | 0.64 | 0.14 | 21  |
| 22 C14B1.1  | QLVPVWDELAEK          | 30  | 2104  | 0.65 | 0.16 | 24  |
| 10 C14B1.1  | YDEAADLLK             | 30  | 1540  | 0.65 | 0.22 | 33  |
| 7 C14B1.1   | VLVASNFNEIALDETK      | 103 | 3314  | 0.66 | 0.11 | 17  |
| 7 C14B1.1   | VDATENQALASK          | 45  | 2596  | 0.66 | 0.26 | 39  |
| 1 C14B1.1   | TRVVVLGYFK            | 18  | 1113  | 0.67 | 0.25 | 38  |
| 10 C14B1.1  | SGPTVTTVESVEQLEELK    | 104 | 5736  | 0.67 | 0.12 | 18  |
| 1 C14B1.1   | TRVVVLGYFK            | 15  | 1084  | 0.67 | 0.15 | 22  |
| 22 C14B1.1  | VLVASNFNEIALDETK      | 109 | 2828  | 0.67 | 0.16 | 24  |
| 22 C14B1.1  | SGPTVTTVESVEQLEELK    | 100 | 5175  | 0.67 | 0.10 | 15  |
| 7 C14B1.1   | QLVPVWDELAEK          | 21  | 3055  | 0.67 | 0.33 | 49  |
| 22 C14B1.1  | YDEAADLLK             | 25  | 2040  | 0.68 | 0.21 | 31  |
| 22 C14B1.1  | LDATLNELADVK          | 13  | 380   | 0.68 | 0.48 | 71  |
| 1 C14B1.1   | SGPTVTTVESVEQLEELK    | 94  | 1598  | 0.69 | 0.23 | 33  |
| 1 C14B1.1   | NTPANRIVSLADQVEK      | 35  | 2007  | 0.69 | 0.15 | 22  |
| 22 C14B1.1  | VLVASNFNEIALDETK      | 106 | 2865  | 0.70 | 0.12 | 17  |
| 22 C14B1.1  | AQDLPEDWNALPVK        | 30  | 2938  | 0.70 | 0.09 | 13  |
| 22 C14B1.1  | VDATENQALASK          | 29  | 1551  | 0.70 | 0.09 | 12  |
| 1 C14B1.1   | NTPANRIVSLADQVEK      | 38  | 4578  | 0.70 | 0.15 | 22  |
| 7 C14B1.1   | NTPANRIVSLADQVEK      | 70  | 6086  | 0.71 | 0.15 | 21  |
| 10 C14B1.1  | NTPANRIVSLADQVEK      | 35  | 3642  | 0.72 | 0.11 | 15  |
| 7 C14B1.1   | NTPANRIVSLADQVEK      | 49  | 6225  | 0.72 | 0.13 | 19  |
| 22 C14B1.1  | YTGGRATAQIVDWVK       | 53  | 5799  | 0.72 | 0.15 | 20  |
| 7 C14B1.1   | VLVASNFNEIALDETK      | 103 | 2672  | 0.73 | 0.12 | 16  |
| 10 C14B1.1  | SGPTVTTVESVEQLEELK    | 113 | 5346  | 0.73 | 0.12 | 17  |
| 22 C14B1.1  | NTPANRIVSLADQVEK      | 50  | 12185 | 0.74 | 0.10 | 14  |
| 7 C14B1.1   | YDEAADLLK             | 16  | 1183  | 0.75 | 0.10 | 14  |
| 1 C14B1.1   | NTPANRIVSLADQVEK      | 42  | 5813  | 0.75 | 0.14 | 19  |
| 7 C14B1.1   | YESNPNVVIK            | 22  | 1618  | 0.75 | 0.27 | 36  |
| 10 C14B1.1  | QWLHAYK               | 20  | 10843 | 0.75 | 0.29 | 39  |
| 7 C14B1.1   | YDEAADLLK             | 18  | 1651  | 0.75 | 0.20 | 26  |
| 10 C14B1.1  | QWLHAYK               | 15  | 10833 | 0.76 | 0.17 | 22  |
| 1 C14B1.1   | NTPANRIVSLADQVEK      | 25  | 2309  | 0.77 | 0.08 | 11  |
| 1 C14B1.1   | SGPTVTTVESVEQLEELK    | 125 | 1815  | 0.77 | 0.14 | 19  |
| 22 C14B1.1  | QWLHAYK               | 30  | 11170 | 0.77 | 0.16 | 20  |
| 1 C14B1.1   | LDATLNELADVK          | 77  | 1079  | 0.77 | 0.15 | 19  |
| 10 C14B1.1  | NTPANRIVSLADQVEK      | 32  | 1997  | 0.79 | 0.28 | 35  |
| 7 C14B1.1   | YTGGRATAQIVDWVK       | 41  | 4108  | 0.79 | 0.18 | 23  |
| 22 C14B1.1  | FKPQEGEDFEFTNSYLEGK   | 53  | 14184 | 0.80 | 0.44 | 55  |
| 22 C14B1.1  | YTGGRATAQIVDWVK       | 13  | 8060  | 0.80 | 0.09 | 11  |
| 22 C14B1.1  | SGPTVTTVESVEQLEELK    | 88  | 4233  | 0.80 | 0.11 | 13  |
| 22 C14B1.1  | LDATLNELADVK          | 31  | 476   | 0.81 | 0.14 | 17  |
| 7 C14B1.1   | NTPANRIVSLADQVEK      | 53  | 3776  | 0.81 | 0.10 | 12  |

|            |                     |     |       |      |      |    |
|------------|---------------------|-----|-------|------|------|----|
| 7 C14B1.1  | AQDLPEDWNALPVK      | 17  | 550   | 0.81 | 0.15 | 18 |
| 10 C14B1.1 | NTPANRIVSLADQVEK    | 40  | 2534  | 0.82 | 0.17 | 21 |
| 7 C14B1.1  | NTPANRIVSLADQVEK    | 46  | 3236  | 0.83 | 0.23 | 28 |
| 1 C14B1.1  | NTPANRIVSLADQVEK    | 10  | 1504  | 0.83 | 0.22 | 26 |
| 1 C14B1.1  | YESNPNVVIK          | 29  | 2096  | 0.83 | 0.21 | 26 |
| 1 C14B1.1  | LDATLNELADVK        | 77  | 1101  | 0.84 | 0.15 | 18 |
| 7 C14B1.1  | YESNPNVVIK          | 67  | 5316  | 0.84 | 0.12 | 14 |
| 10 C14B1.1 | YDEAADLLK           | 33  | 1750  | 0.84 | 0.22 | 26 |
| 7 C14B1.1  | LDATLNELADVK        | 64  | 2424  | 0.85 | 0.13 | 16 |
| 10 C14B1.1 | YTGGRATAQIVDWVK     | 48  | 6676  | 0.85 | 0.11 | 13 |
| 22 C14B1.1 | FHFLIRK             | 25  | 4168  | 0.85 | 0.10 | 12 |
| 7 C14B1.1  | LDATLNELADVK        | 77  | 2924  | 0.85 | 0.10 | 11 |
| 10 C14B1.1 | FKPQEGEDFEFTNSYLEGK | 61  | 12202 | 0.85 | 0.30 | 35 |
| 22 C14B1.1 | NTPANRIVSLADQVEK    | 39  | 3741  | 0.86 | 0.12 | 14 |
| 7 C14B1.1  | VLVASFNEIALDETK     | 74  | 2447  | 0.86 | 0.11 | 13 |
| 10 C14B1.1 | FKPQEGEDFEFTNSYLEGK | 58  | 18587 | 0.86 | 0.22 | 25 |
| 22 C14B1.1 | NTPANRIVSLADQVEK    | 28  | 1860  | 0.86 | 0.18 | 21 |
| 1 C14B1.1  | YESNPNVVIK          | 41  | 2456  | 0.86 | 0.13 | 15 |
| 22 C14B1.1 | FHFLIRK             | 20  | 4247  | 0.87 | 0.10 | 12 |
| 10 C14B1.1 | AQDLPEDWNALPVK      | 34  | 2764  | 0.87 | 0.09 | 10 |
| 22 C14B1.1 | YTGGRATAQIVDWVK     | 53  | 5433  | 0.88 | 0.19 | 21 |
| 10 C14B1.1 | FEVRGYPTILYFK       | 44  | 4149  | 0.88 | 0.12 | 14 |
| 10 C14B1.1 | QWLHAYK             | 21  | 8824  | 0.88 | 0.08 | 10 |
| 7 C14B1.1  | QWLHAYK             | 15  | 6564  | 0.89 | 0.13 | 15 |
| 22 C14B1.1 | NTPANRIVSLADQVEK    | 24  | 1608  | 0.89 | 0.20 | 23 |
| 22 C14B1.1 | NTPANRIVSLADQVEK    | 57  | 15723 | 0.90 | 0.10 | 11 |
| 1 C14B1.1  | NTPANRIVSLADQVEK    | 42  | 5420  | 0.91 | 0.10 | 12 |
| 22 C14B1.1 | NTPANRIVSLADQVEK    | 36  | 5635  | 0.91 | 0.09 | 9  |
| 1 C14B1.1  | NTPANRIVSLADQVEK    | 41  | 7973  | 0.91 | 0.16 | 17 |
| 22 C14B1.1 | QWLHAYK             | 19  | 10412 | 0.92 | 0.13 | 14 |
| 7 C14B1.1  | AQDLPEDWNALPVK      | 14  | 1048  | 0.92 | 0.10 | 11 |
| 10 C14B1.1 | QWLHAYK             | 24  | 13880 | 0.92 | 0.09 | 10 |
| 10 C14B1.1 | FEVRGYPTILYFK       | 28  | 1815  | 0.93 | 0.12 | 13 |
| 22 C14B1.1 | FKPQEGEDFEFTNSYLEGK | 34  | 1150  | 0.93 | 0.38 | 41 |
| 10 C14B1.1 | VLVASFNEIALDETK     | 100 | 2836  | 0.93 | 0.14 | 15 |
| 7 C14B1.1  | QLVPVWDELAEK        | 21  | 3655  | 0.93 | 0.18 | 19 |
| 22 C14B1.1 | NTPANRIVSLADQVEK    | 52  | 3740  | 0.94 | 0.16 | 17 |
| 22 C14B1.1 | YDEAADLLK           | 59  | 8586  | 0.94 | 0.09 | 10 |
| 22 C14B1.1 | NTPANRIVSLADQVEK    | 40  | 7678  | 0.95 | 0.10 | 10 |
| 22 C14B1.1 | NTPANRIVSLADQVEK    | 47  | 12719 | 0.96 | 0.09 | 9  |
| 7 C14B1.1  | NTPANRIVSLADQVEK    | 34  | 7116  | 0.97 | 0.10 | 10 |
| 7 C14B1.1  | VLVASFNEIALDETK     | 88  | 2405  | 0.97 | 0.19 | 20 |
| 1 C14B1.1  | VNSFPTLK            | 28  | 8601  | 0.98 | 0.10 | 10 |
| 22 C14B1.1 | QWLHAYK             | 20  | 17113 | 0.98 | 0.16 | 17 |
| 22 C14B1.1 | NTPANRIVSLADQVEK    | 21  | 2274  | 0.99 | 0.21 | 21 |
| 10 C14B1.1 | NTPANRIVSLADQVEK    | 61  | 20110 | 1.01 | 0.11 | 10 |
| 7 C14B1.1  | QWLHAYK             | 22  | 9744  | 1.02 | 0.14 | 14 |
| 7 C14B1.1  | FKPQEGEDFEFTNSYLEGK | 63  | 7342  | 1.02 | 0.14 | 13 |
| 22 C14B1.1 | FKPQEGEDFEFTNSYLEGK | 53  | 2378  | 1.03 | 0.15 | 15 |
| 22 C14B1.1 | YTGGRATAQIVDWVK     | 23  | 5282  | 1.03 | 0.10 | 9  |
| 10 C14B1.1 | FKPQEGEDFEFTNSYLEGK | 65  | 13569 | 1.04 | 0.52 | 50 |
| 1 C14B1.1  | QWLHAYK             | 20  | 3096  | 1.04 | 0.21 | 20 |
| 7 C14B1.1  | FHFLIRK             | 15  | 2885  | 1.05 | 0.32 | 31 |
| 10 C14B1.1 | YTGGRATAQIVDWVK     | 38  | 8781  | 1.07 | 0.09 | 8  |
| 7 C14B1.1  | QWLHAYK             | 13  | 5809  | 1.07 | 0.17 | 16 |
| 7 C14B1.1  | QWLHAYK             | 19  | 7811  | 1.07 | 0.09 | 9  |
| 10 C14B1.1 | FHFLIRK             | 22  | 5038  | 1.08 | 0.10 | 10 |
| 7 C14B1.1  | VLVASFNEIALDETK     | 13  | 2256  | 1.08 | 0.25 | 23 |
| 10 C14B1.1 | QWLHAYK             | 15  | 14917 | 1.09 | 0.17 | 16 |
| 7 C14B1.1  | YDEAADLLK           | 58  | 6161  | 1.09 | 0.07 | 6  |
| 10 C14B1.1 | QWLHAYK             | 17  | 9108  | 1.10 | 0.27 | 25 |
| 22 C14B1.1 | QWLHAYK             | 13  | 10777 | 1.10 | 0.18 | 16 |
| 7 C14B1.1  | VLVASFNEIALDETK     | 32  | 2643  | 1.11 | 0.16 | 14 |
| 10 C14B1.1 | NTPANRIVSLADQVEK    | 58  | 3638  | 1.11 | 0.12 | 11 |
| 10 C14B1.1 | NTPANRIVSLADQVEK    | 31  | 2905  | 1.11 | 0.12 | 11 |
| 10 C14B1.1 | YDEAADLLK           | 46  | 5169  | 1.12 | 0.10 | 9  |
| 1 C14B1.1  | NTPANRIVSLADQVEK    | 28  | 2525  | 1.12 | 0.15 | 13 |
| 22 C14B1.1 | YDEAADLLK           | 50  | 7077  | 1.12 | 0.08 | 7  |
| 22 C14B1.1 | LDATLNELADVK        | 66  | 2060  | 1.13 | 0.15 | 14 |
| 22 C14B1.1 | VLVASFNEIALDETK     | 15  | 1441  | 1.13 | 0.19 | 17 |
| 22 C14B1.1 | YESNPNVVIK          | 19  | 1280  | 1.14 | 0.16 | 14 |
| 7 C14B1.1  | YESNPNVVIK          | 39  | 2120  | 1.15 | 0.14 | 12 |
| 7 C14B1.1  | YDEAADLLK           | 31  | 4168  | 1.15 | 0.07 | 6  |
| 10 C14B1.1 | VLVASFNEIALDETK     | 77  | 2138  | 1.15 | 0.20 | 18 |
| 1 C14B1.1  | AQDLPEDWNALPVK      | 40  | 1858  | 1.16 | 0.11 | 10 |
| 22 C14B1.1 | QLVPVWDELAEK        | 29  | 3247  | 1.16 | 0.15 | 13 |
| 1 C14B1.1  | QWLHAYK             | 17  | 4709  | 1.18 | 0.21 | 18 |
| 10 C14B1.1 | FKPQEGEDFEFTNSYLEGK | 62  | 15005 | 1.19 | 0.52 | 44 |
| 1 C14B1.1  | VNSFPTLK            | 17  | 1113  | 1.19 | 0.11 | 9  |
| 10 C14B1.1 | YTGGRATAQIVDWVK     | 62  | 8458  | 1.21 | 0.16 | 13 |
| 22 C14B1.1 | QWLHAYK             | 19  | 14381 | 1.22 | 0.06 | 5  |
| 7 C14B1.1  | FKPQEGEDFEFTNSYLEGK | 58  | 3773  | 1.23 | 0.03 | 3  |
| 7 C14B1.1  | TRVVVLGYFK          | 22  | 526   | 1.25 | 0.09 | 7  |
| 22 C14B1.1 | TRVVVLGYFK          | 28  | 1794  | 1.26 | 0.17 | 13 |
| 22 C14B1.1 | FEVRGYPTILYFK       | 16  | 974   | 1.26 | 0.22 | 17 |
| 22 C14B1.1 | FKPQEGEDFEFTNSYLEGK | 48  | 7783  | 1.28 | 0.05 | 4  |
| 1 C14B1.1  | FEFVNK              | 19  | 879   | 1.29 | 0.14 | 11 |
| 10 C14B1.1 | NTPANRIVSLADQVEK    | 42  | 24097 | 1.29 | 0.12 | 9  |
| 7 C14B1.1  | VLVASFNEIALDETK     | 21  | 1676  | 1.41 | 0.13 | 9  |
| 7 C14B1.1  | TRVVVLGYFK          | 22  | 1175  | 1.41 | 0.27 | 19 |
| 22 C14B1.1 | TRVVVLGYFK          | 19  | 1682  | 1.42 | 0.08 | 5  |
| 7 C14B1.1  | VNSFPTLK            | 22  | 1540  | 1.43 | 0.10 | 7  |
| 10 C14B1.1 | YDEAADLLK           | 49  | 3470  | 1.43 | 0.16 | 11 |
| 22 C14B1.1 | QWLHAYK             | 15  | 10193 | 1.51 | 0.16 | 11 |
| 10 C14B1.1 | QWLHAYK             | 10  | 14958 | 1.52 | 0.08 | 5  |
| 10 C14B1.1 | NTPANRIVSLADQVEK    | 16  | 1241  | 1.53 | 0.39 | 25 |
| 10 C14B1.1 | TRVVVLGYFK          | 20  | 2019  | 1.55 | 0.11 | 7  |
| 1 C14B1.1  | AQDLPEDWNALPVK      | 42  | 2425  | 1.56 | 0.10 | 7  |
| 1 C14B1.1  | YTGGRATAQIVDWVK     | 21  | 1630  | 1.62 | 0.25 | 15 |
| 1 C14B1.1  | VNSFPTLK            | 16  | 1096  | 1.64 | 0.25 | 15 |
| 1 C14B1.1  | FEFVNK              | 27  | 888   | 1.65 | 0.18 | 11 |

|                        |                       |    |       |      |      |     |
|------------------------|-----------------------|----|-------|------|------|-----|
| 7 C14B1.1              | FKPQEGEDFEFTNSYLEGK   | 63 | 4556  | 1.66 | 0.19 | 11  |
| 7 C14B1.1              | QWLHAYK               | 24 | 9279  | 1.68 | 0.16 | 10  |
| 1 C14B1.1              | LDATLNELADVК          | 36 | 308   | 1.71 | 0.10 | 6   |
| 22 C14B1.1             | LDATLNELADVК          | 31 | 603   | 1.72 | 0.20 | 12  |
| 22 C14B1.1             | QWLHAYK               | 12 | 11495 | 1.80 | 0.18 | 10  |
| 22 C14B1.1             | VLVASFNEIALDETK       | 79 | 1933  | 1.87 | 0.18 | 9   |
| 1 C14B1.1              | FEFVVK                | 20 | 1013  | 1.95 | 0.22 | 12  |
| 22 C14B1.1             | YDEAADLLK             | 37 | 1711  | 1.95 | 0.12 | 6   |
| 22 C14B1.1             | LSAVTEFTHESAQEIVGGDLK | 21 | 3167  | 1.96 | 0.18 | 9   |
| 22 C14B1.1             | VLVASFNEIALDETK       | 83 | 1452  | 2.00 | 0.07 | 3   |
| 7 C14B1.1              | QWLHAYK               | 24 | 6821  | 2.02 | 0.12 | 6   |
| 1 C14B1.1              | FEFVVK                | 16 | 1279  | 2.04 | 0.21 | 10  |
| 10 C14B1.1             | TRVVVLGYFK            | 17 | 1804  | 2.05 | 0.12 | 6   |
| 1 C14B1.1              | QWLHAYK               | 21 | 7123  | 2.05 | 0.29 | 14  |
| 22 C14B1.1             | LSAVTEFTHESAQEIVGGDLK | 22 | 3066  | 2.09 | 0.08 | 4   |
| 10 C14B1.1             | QWLHAYK               | 17 | 5712  | 2.12 | 0.18 | 9   |
| 22 C14B1.1             | LDATLNELADVК          | 80 | 1310  | 2.15 | 0.15 | 7   |
| 10 C14B1.1             | QWLHAYK               | 10 | 11806 | 2.16 | 0.18 | 8   |
| 22 C14B1.1             | QWLHAYK               | 11 | 8955  | 2.16 | 0.21 | 10  |
| 1 C14B1.1              | QLVPVWDELAEK          | 16 | 1119  | 2.18 | 0.27 | 12  |
| 22 C14B1.1             | NTPANRIVSLADQVEK      | 20 | 3389  | 2.20 | 0.16 | 7   |
| 1 C14B1.1              | NTPANRIVSLADQVEK      | 35 | 1031  | 2.34 | 0.21 | 9   |
| 1 C14B1.1              | YDEAADLLK             | 22 | 1231  | 2.37 | 0.09 | 4   |
| 1 C14B1.1              | YDEAADLLK             | 33 | 1348  | 2.66 | 0.10 | 4   |
| 1 C14B1.1              | NTPANRIVSLADQVEK      | 40 | 3911  | 2.89 | 0.28 | 10  |
| 1 C14B1.1              | NTPANRIVSLADQVEK      | 33 | 1050  | 3.12 | 0.13 | 4   |
| 1 C14B1.1              | NTPANRIVSLADQVEK      | 37 | 3296  | 3.75 | 0.15 | 4   |
| 7 C14B9.2              | HLAPEYEK              | 19 | 10825 | 0.47 | 0.18 | 39  |
| 10 C14B9.2             | RFEIQGYPTLK           | 26 | 1235  | 0.57 | 0.34 | 60  |
| 7 C14B9.2              | HLAPEYEK              | 28 | 6080  | 0.60 | 0.21 | 35  |
| 7 C14B9.2              | RFEIQGYPTLK           | 48 | 2643  | 0.87 | 0.26 | 30  |
| 7 C14B9.2              | NFDAFLK               | 22 | 1327  | 0.91 | 0.13 | 14  |
| 1 C14B9.2              | RFEIQGYPTLK           | 24 | 789   | 1.00 | 0.08 | 8   |
| 7 C14B9.2              | TMGHTSDPAAFK          | 35 | 2685  | 1.15 | 0.20 | 17  |
| 22 C14B9.2             | HLAPEYEK              | 16 | 7823  | 1.95 | 0.12 | 6   |
| 10 C14B9.2             | RFEIQGYPTLK           | 19 | 2049  | 2.03 | 0.12 | 6   |
| 10 C14B9.2             | RFEIQGYPTLK           | 40 | 1835  | 2.22 | 0.09 | 4   |
| 1 C14B9.7              | HGVEHLSTYYTQYK        | 33 | 7791  | 0.18 | 0.23 | 133 |
| 22 C14B9.7             | HGVEHLSTYYTQYK        | 50 | 9868  | 0.24 | 0.13 | 52  |
| 10 C14B9.7             | HGVEHLSTYYTQYK        | 42 | 8921  | 0.26 | 0.39 | 151 |
| 1 C14B9.7              | HGVEHLSTYYTQYK        | 30 | 6618  | 0.34 | 0.18 | 52  |
| 22 C14B9.7             | RVRGNILPK             | 18 | 17114 | 0.35 | 0.41 | 119 |
| 22 C14B9.7             | HGVEHLSTYYTQYK        | 41 | 8524  | 0.40 | 0.13 | 33  |
| 22 C14B9.7             | RVRGNILPK             | 10 | 4328  | 0.69 | 0.33 | 48  |
| 7 C14B9.7              | HGVEHLSTYYTQYK        | 10 | 3233  | 0.85 | 0.18 | 21  |
| 22 C14B9.7             | RVRGNILPK             | 15 | 6173  | 0.94 | 0.28 | 30  |
| 10 C14B9.7             | SAGQVPVPAK            | 17 | 3990  | 1.12 | 0.41 | 37  |
| 10 C14B9.7             | RVRGNILPK             | 11 | 5121  | 1.43 | 0.32 | 22  |
| 10 C14B9.7             | SAGQVPVPAK            | 19 | 7129  | 2.13 | 0.47 | 22  |
| 10 C14C10.5            | LITYAPLK              | 21 | 1376  | 0.65 | 0.10 | 16  |
| 10 C14C10.5            | LITYAPLK              | 18 | 1211  | 0.81 | 0.19 | 24  |
| 22 C14C10.5;F29B9.12   | LITYAPLK              | 14 | 556   | 0.68 | 0.12 | 18  |
| 22 C14C10.5;F29B9.12   | LITYAPLK              | 13 | 899   | 0.72 | 0.15 | 21  |
| 22 C14C10.5;F29B9.12   | LITYAPLK              | 15 | 1098  | 0.75 | 0.13 | 17  |
| 22 C14C10.5;F29B9.12   | LITYAPLK              | 16 | 1494  | 0.84 | 0.17 | 20  |
| 1 C14C10.5;F29B9.12    | LITYAPLK              | 11 | 287   | 0.91 | 0.16 | 18  |
| 22 C14C10.5;F29B9.12   | LITYAPLK              | 28 | 1363  | 1.12 | 0.20 | 18  |
| 22 C14F11.1a;C14F11.1b | EYAGIVGLPEFTK         | 41 | 2053  | 0.49 | 0.27 | 54  |
| 22 C14F11.1a;C14F11.1b | EYAGIVGLPEFTK         | 22 | 1785  | 0.52 | 0.45 | 88  |
| 22 C14F11.1a;C14F11.1b | EYAGIVGLPEFTK         | 46 | 3791  | 0.55 | 0.15 | 28  |
| 22 C14F11.1a;C14F11.1b | EAERQVIAANLDK         | 46 | 4104  | 0.56 | 0.17 | 31  |
| 22 C14F11.1a;C14F11.1b | EYAGIVGLPEFTK         | 43 | 3969  | 0.57 | 0.27 | 47  |
| 7 C14F11.1a;C14F11.1b  | EYAGIVGLPEFTK         | 29 | 4309  | 0.57 | 0.08 | 13  |
| 22 C14F11.1a;C14F11.1b | EYAGIVGLPEFTK         | 26 | 1516  | 0.57 | 0.23 | 40  |
| 22 C14F11.1a;C14F11.1b | EYAGIVGLPEFTK         | 27 | 2777  | 0.61 | 0.26 | 42  |
| 22 C14F11.1a;C14F11.1b | FAGVDVK               | 22 | 1756  | 0.65 | 0.25 | 38  |
| 10 C14F11.1a;C14F11.1b | EAERQVIAANLDK         | 12 | 4177  | 0.66 | 0.16 | 25  |
| 22 C14F11.1a;C14F11.1b | EAERQVIAANLDK         | 19 | 4732  | 0.67 | 0.34 | 52  |
| 7 C14F11.1a;C14F11.1b  | EYAGIVGLPEFTK         | 18 | 2211  | 0.67 | 0.12 | 18  |
| 10 C14F11.1a;C14F11.1b | EYAGIVGLPEFTK         | 29 | 2609  | 0.68 | 0.26 | 38  |
| 7 C14F11.1a;C14F11.1b  | EYAGIVGLPEFTK         | 34 | 2382  | 0.70 | 0.18 | 25  |
| 1 C14F11.1a;C14F11.1b  | EAERQVIAANLDK         | 20 | 3823  | 0.72 | 0.19 | 26  |
| 10 C14F11.1a;C14F11.1b | EAERQVIAANLDK         | 15 | 4520  | 0.73 | 0.20 | 27  |
| 22 C14F11.1a;C14F11.1b | EYAGIVGLPEFTK         | 29 | 1877  | 0.77 | 0.15 | 19  |
| 7 C14F11.1a;C14F11.1b  | EYAGIVGLPEFTK         | 32 | 3335  | 0.77 | 0.16 | 20  |
| 1 C14F11.1a;C14F11.1b  | EAERQVIAANLDK         | 15 | 4686  | 0.77 | 0.12 | 15  |
| 10 C14F11.1a;C14F11.1b | LSAQLALGENSDVIK       | 22 | 2203  | 0.78 | 0.11 | 14  |
| 22 C14F11.1a;C14F11.1b | EYAGIVGLPEFTK         | 43 | 3348  | 0.79 | 0.26 | 33  |
| 1 C14F11.1a;C14F11.1b  | FAGVDVK               | 33 | 3306  | 0.80 | 0.05 | 7   |
| 22 C14F11.1a;C14F11.1b | EYAGIVGLPEFTK         | 16 | 3319  | 0.80 | 0.19 | 24  |
| 22 C14F11.1a;C14F11.1b | EAERQVIAANLDK         | 22 | 3129  | 0.80 | 0.25 | 32  |
| 1 C14F11.1a;C14F11.1b  | EHSVYLTK              | 25 | 6538  | 0.80 | 0.29 | 37  |
| 22 C14F11.1a;C14F11.1b | LSAQLALGENSDVIK       | 16 | 1363  | 0.82 | 0.13 | 15  |
| 7 C14F11.1a;C14F11.1b  | FAGVDVK               | 28 | 4892  | 0.86 | 0.15 | 18  |
| 22 C14F11.1a;C14F11.1b | FAGVDVK               | 22 | 2976  | 0.86 | 0.13 | 15  |
| 22 C14F11.1a;C14F11.1b | FAGVDVK               | 36 | 2680  | 0.86 | 0.09 | 10  |
| 1 C14F11.1a;C14F11.1b  | EYAGIVGLPEFTK         | 30 | 3086  | 0.86 | 0.17 | 20  |
| 1 C14F11.1a;C14F11.1b  | EAERQVIAANLDK         | 21 | 5070  | 0.87 | 0.15 | 17  |
| 7 C14F11.1a;C14F11.1b  | EAERQVIAANLDK         | 36 | 6484  | 0.87 | 0.10 | 12  |
| 10 C14F11.1a;C14F11.1b | FAGVDVK               | 17 | 1831  | 0.88 | 0.17 | 19  |
| 10 C14F11.1a;C14F11.1b | EYAGIVGLPEFTK         | 29 | 2971  | 0.89 | 0.14 | 15  |
| 22 C14F11.1a;C14F11.1b | EYAGIVGLPEFTK         | 27 | 5277  | 0.89 | 0.08 | 9   |
| 1 C14F11.1a;C14F11.1b  | FAGVDVK               | 31 | 3047  | 0.90 | 0.10 | 11  |
| 1 C14F11.1a;C14F11.1b  | EYAGIVGLPEFTK         | 32 | 2630  | 0.91 | 0.10 | 11  |
| 22 C14F11.1a;C14F11.1b | FAGVDVK               | 26 | 3606  | 0.95 | 0.21 | 23  |
| 10 C14F11.1a;C14F11.1b | EYAGIVGLPEFTK         | 49 | 4670  | 0.96 | 0.13 | 13  |
| 10 C14F11.1a;C14F11.1b | EYAGIVGLPEFTK         | 47 | 2942  | 0.98 | 0.29 | 30  |
| 1 C14F11.1a;C14F11.1b  | EHSVYLTK              | 13 | 4826  | 1.00 | 0.34 | 35  |
| 7 C14F11.1a;C14F11.1b  | EAERQVIAANLDK         | 29 | 8351  | 1.02 | 0.16 | 15  |
| 7 C14F11.1a;C14F11.1b  | FAGVDVK               | 24 | 4023  | 1.03 | 0.15 | 14  |
| 1 C14F11.1a;C14F11.1b  | EHSVYLTK              | 14 | 5135  | 1.05 | 0.19 | 18  |

|                        |                   |    |       |      |      |    |
|------------------------|-------------------|----|-------|------|------|----|
| 1 C14F11.1a;C14F11.1b  | EAERQVIAANLDK     | 27 | 6585  | 1.06 | 0.25 | 23 |
| 1 C14F11.1a;C14F11.1b  | EAERQVIAANLDK     | 34 | 3245  | 1.09 | 0.08 | 8  |
| 22 C14F11.1a;C14F11.1b | EAERQVIAANLDK     | 46 | 11787 | 1.11 | 0.11 | 10 |
| 22 C14F11.1a;C14F11.1b | VIYQPTPTWGNHVPIFK | 15 | 1237  | 1.12 | 0.20 | 18 |
| 7 C14F11.1a;C14F11.1b  | EYAGIVGLPEFTK     | 25 | 4739  | 1.13 | 0.09 | 8  |
| 7 C14F11.1a;C14F11.1b  | EAERQVIAANLDK     | 33 | 5814  | 1.13 | 0.15 | 13 |
| 1 C14F11.1a;C14F11.1b  | EYAGIVGLPEFTK     | 12 | 1361  | 1.15 | 0.04 | 4  |
| 7 C14F11.1a;C14F11.1b  | EYAGIVGLPEFTK     | 48 | 6117  | 1.15 | 0.10 | 9  |
| 10 C14F11.1a;C14F11.1b | EYAGIVGLPEFTK     | 44 | 2477  | 1.16 | 0.31 | 27 |
| 1 C14F11.1a;C14F11.1b  | EYAGIVGLPEFTK     | 23 | 1239  | 1.18 | 0.12 | 10 |
| 7 C14F11.1a;C14F11.1b  | EAERQVIAANLDK     | 22 | 9825  | 1.21 | 0.11 | 9  |
| 22 C14F11.1a;C14F11.1b | EAERQVIAANLDK     | 23 | 12893 | 1.24 | 0.10 | 8  |
| 1 C14F11.1a;C14F11.1b  | EAERQVIAANLDK     | 35 | 4278  | 1.25 | 0.08 | 6  |
| 22 C14F11.1a;C14F11.1b | LSAQLALGENSDVIK   | 10 | 1240  | 1.27 | 0.10 | 8  |
| 1 C14F11.1a;C14F11.1b  | EYAGIVGLPEFTK     | 27 | 3327  | 1.29 | 0.09 | 7  |
| 1 C14F11.1a;C14F11.1b  | EYAGIVGLPEFTK     | 33 | 2609  | 1.30 | 0.08 | 6  |
| 1 C14F11.1a;C14F11.1b  | FAGVDVK           | 37 | 2356  | 1.31 | 0.09 | 7  |
| 7 C14F11.1a;C14F11.1b  | FAGVDVK           | 21 | 2946  | 1.32 | 0.15 | 12 |
| 1 C14F11.1a;C14F11.1b  | FAGVDVK           | 12 | 1460  | 1.33 | 0.11 | 8  |
| 22 C14F11.1a;C14F11.1b | EHSVYLTK          | 11 | 7416  | 1.33 | 0.14 | 11 |
| 22 C14F11.1a;C14F11.1b | FAGVDVK           | 14 | 1586  | 1.34 | 0.19 | 14 |
| 10 C14F11.1a;C14F11.1b | FAGVDVK           | 27 | 1561  | 1.35 | 0.24 | 18 |
| 1 C14F11.1a;C14F11.1b  | EYAGIVGLPEFTK     | 16 | 2078  | 1.35 | 0.07 | 5  |
| 7 C14F11.1a;C14F11.1b  | FAGVDVK           | 16 | 2461  | 1.38 | 0.16 | 11 |
| 1 C14F11.1a;C14F11.1b  | EAERQVIAANLDK     | 59 | 4045  | 1.38 | 0.14 | 10 |
| 7 C14F11.1a;C14F11.1b  | FAGVDVK           | 27 | 2912  | 1.41 | 0.18 | 13 |
| 1 C14F11.1a;C14F11.1b  | EHSVYLTK          | 20 | 5535  | 1.42 | 0.14 | 10 |
| 10 C14F11.1a;C14F11.1b | EAERQVIAANLDK     | 38 | 5944  | 1.52 | 0.12 | 8  |
| 22 C14F11.1a;C14F11.1b | EHSVYLTK          | 11 | 2903  | 1.52 | 0.33 | 21 |
| 22 C14F11.1a;C14F11.1b | EAERQVIAANLDK     | 17 | 4230  | 1.54 | 0.27 | 18 |
| 10 C14F11.1a;C14F11.1b | EAERQVIAANLDK     | 51 | 7552  | 1.55 | 0.13 | 9  |
| 10 C14F11.1a;C14F11.1b | EAERQVIAANLDK     | 23 | 7575  | 1.55 | 0.13 | 8  |
| 22 C14F11.1a;C14F11.1b | EYAGIVGLPEFTK     | 27 | 2769  | 1.56 | 0.14 | 9  |
| 7 C14F11.1a;C14F11.1b  | EAERQVIAANLDK     | 11 | 1695  | 1.57 | 0.26 | 17 |
| 1 C14F11.1a;C14F11.1b  | EYAGIVGLPEFTK     | 28 | 1724  | 1.59 | 0.10 | 6  |
| 10 C14F11.1a;C14F11.1b | FAGVDVK           | 11 | 1798  | 1.62 | 0.19 | 12 |
| 22 C14F11.1a;C14F11.1b | FAGVDVK           | 38 | 7019  | 2.03 | 0.11 | 5  |
| 22 C14F11.1a;C14F11.1b | EYAGIVGLPEFTK     | 11 | 1636  | 2.21 | 0.11 | 5  |
| 22 C14F11.1a;C14F11.1b | FAGVDVK           | 10 | 1051  | 2.26 | 0.11 | 5  |
| 1 C14F11.1a;C14F11.1b  | EAERQVIAANLDK     | 21 | 5187  | 2.28 | 0.28 | 12 |
| 10 C14F11.1a;C14F11.1b | EYAGIVGLPEFTK     | 18 | 3328  | 2.48 | 0.08 | 3  |
| 10 C14F11.1a;C14F11.1b | EYAGIVGLPEFTK     | 14 | 1348  | 2.62 | 0.18 | 7  |
| 22 C14F11.6            | EVIEAIPDLLVIKPK   | 52 | 2701  | 0.32 | 0.09 | 29 |
| 22 C14F11.6            | EVIEAIPDLLVIKPK   | 56 | 3513  | 0.67 | 0.10 | 15 |
| 22 C14F11.6            | TVVIVSERDTQHASFK  | 20 | 10938 | 0.91 | 0.27 | 30 |
| 1 C14F11.6             | RFQLEK            | 14 | 4729  | 1.24 | 0.12 | 10 |
| 22 C14F11.6            | WHGVVLNGDNK       | 23 | 5201  | 1.39 | 0.14 | 10 |
| 10 C14F11.6            | WHGVVLNGDNK       | 19 | 4516  | 1.45 | 0.06 | 4  |
| 10 C14F11.6            | WHGVVLNGDNK       | 19 | 5310  | 1.55 | 0.16 | 10 |
| 7 C15C8.3a;C15C8.3b    | FDMTYNTGEVK       | 45 | 2115  | 0.21 | 0.12 | 58 |
| 7 C15C8.3a;C15C8.3b    | SVVTSLAK          | 56 | 24256 | 0.23 | 0.14 | 63 |
| 7 C15C8.3a;C15C8.3b    | SVVTSLAK          | 57 | 17929 | 0.28 | 0.07 | 26 |
| 7 C15C8.3a;C15C8.3b    | FDMTYNTGEVK       | 37 | 1876  | 0.32 | 0.13 | 39 |
| 1 C15C8.3a;C15C8.3b    | FDMTYNTGEVK       | 23 | 726   | 0.34 | 0.13 | 38 |
| 10 C15C8.3a;C15C8.3b   | FDMTYNTGEVK       | 14 | 761   | 0.46 | 0.18 | 39 |
| 1 C15C8.3a;C15C8.3b    | SVVTSLAK          | 12 | 712   | 0.49 | 0.24 | 48 |
| 1 C15C8.3a;C15C8.3b    | SVVTSLAK          | 28 | 802   | 0.69 | 0.26 | 37 |
| 22 C15C8.3a;C15C8.3b   | SVVTSLAK          | 36 | 3905  | 0.76 | 0.21 | 28 |
| 22 C15C8.3a;C15C8.3b   | FDMTYNTGEVK       | 38 | 1121  | 0.80 | 0.10 | 12 |
| 22 C15C8.3a;C15C8.3b   | SVVTSLAK          | 35 | 3014  | 0.80 | 0.15 | 19 |
| 22 C15C8.3a;C15C8.3b   | FDMTYNTGEVK       | 42 | 1588  | 0.84 | 0.17 | 20 |
| 10 C15C8.3a;C15C8.3b   | SVVTSLAK          | 36 | 12604 | 0.86 | 0.09 | 10 |
| 10 C15C8.3a;C15C8.3b   | FDMTYNTGEVK       | 46 | 3790  | 0.87 | 0.11 | 12 |
| 7 C15C8.3a;C15C8.3b    | SGRLGLAK          | 13 | 1399  | 0.94 | 0.12 | 13 |
| 1 C15C8.3a;C15C8.3b    | FDMTYNTGEVK       | 14 | 755   | 0.96 | 0.17 | 17 |
| 7 C15C8.3a;C15C8.3b    | FDMTYNTGEVK       | 20 | 1192  | 1.01 | 0.21 | 20 |
| 22 C15C8.3a;C15C8.3b   | FDMTYNTGEVK       | 49 | 1811  | 1.07 | 0.11 | 10 |
| 1 C15C8.3a;C15C8.3b    | SVVTSLAK          | 23 | 7864  | 1.17 | 0.10 | 9  |
| 7 C15C8.3a;C15C8.3b    | FDMTYNTGEVK       | 26 | 1473  | 1.81 | 0.24 | 13 |
| 22 C15C8.3a;C15C8.3b   | SVVTSLAK          | 10 | 1006  | 2.15 | 0.18 | 9  |
| 7 C15C8.3a;C15C8.3b    | SVVTSLAK          | 34 | 7919  | 2.51 | 0.06 | 3  |
| 22 C15C8.3a;C15C8.3b   | SVVTSLAK          | 11 | 966   | 3.33 | 0.18 | 5  |
| 7 C15H11.7             | RAQGEAASWK        | 48 | 1637  | 0.29 | 0.12 | 43 |
| 7 C15H11.7             | RAQGEAASWK        | 44 | 1391  | 0.32 | 0.18 | 58 |
| 10 C15H11.7            | GADAAVIAVQK       | 70 | 12361 | 0.47 | 0.12 | 26 |
| 10 C15H11.7            | GADAAVIAVQK       | 54 | 9550  | 0.49 | 0.10 | 20 |
| 10 C15H11.7            | RAQGEAASWK        | 51 | 4048  | 0.57 | 0.11 | 19 |
| 1 C15H11.7             | GADAAVIAVQK       | 48 | 5292  | 0.61 | 0.08 | 12 |
| 10 C15H11.7            | RAQGEAASWK        | 40 | 4040  | 0.63 | 0.15 | 24 |
| 1 C15H11.7             | AINSTNLTAHAVK     | 65 | 3146  | 0.68 | 0.08 | 12 |
| 1 C15H11.7             | GADAAVIAVQK       | 44 | 3854  | 0.71 | 0.13 | 19 |
| 1 C15H11.7             | GADAAVIAVQK       | 28 | 2758  | 0.71 | 0.09 | 13 |
| 10 C15H11.7            | GADAAVIAVQK       | 20 | 10826 | 0.81 | 0.16 | 20 |
| 10 C15H11.7            | GADAAVIAVQK       | 21 | 12071 | 0.82 | 0.13 | 16 |
| 10 C15H11.7            | DLEVVVVTK         | 17 | 1774  | 0.92 | 0.19 | 21 |
| 22 C15H11.7            | RAQGEAASWK        | 23 | 2907  | 0.95 | 0.10 | 10 |
| 22 C15H11.7            | RAQGEAASWK        | 51 | 4168  | 1.10 | 0.04 | 4  |
| 1 C15H11.7             | QLPATSFLEK        | 21 | 1998  | 1.26 | 0.10 | 8  |
| 22 C15H11.7            | DLEVVVVTK         | 39 | 2225  | 1.37 | 0.16 | 11 |
| 22 C15H11.7            | RAQGEAASWK        | 45 | 4211  | 1.46 | 0.06 | 4  |
| 22 C15H11.7            | GADAAVIAVQK       | 30 | 9697  | 1.50 | 0.06 | 4  |
| 22 C15H11.7            | RAQGEAASWK        | 62 | 4315  | 1.55 | 0.08 | 5  |
| 22 C15H11.7            | GADAAVIAVQK       | 25 | 7612  | 1.85 | 0.10 | 5  |
| 10 C15H11.7            | QLPATSFLEK        | 14 | 5265  | 1.86 | 0.07 | 4  |
| 1 C15H11.7             | QLPATSFLEK        | 14 | 723   | 2.09 | 0.34 | 16 |
| 22 C15H11.7            | DLEVVVVTK         | 25 | 2045  | 2.26 | 0.20 | 9  |
| 22 C15H11.7            | DLEVVVVTK         | 38 | 3087  | 2.26 | 0.11 | 5  |
| 7 C15H11.7             | DLEVVVVTK         | 32 | 2220  | 3.69 | 0.16 | 4  |
| 7 C15H11.7             | GADAAVIAVQK       | 40 | 10061 | 7.01 | 0.14 | 2  |
| 7 C15H11.7             | GADAAVIAVQK       | 31 | 5371  | 7.85 | 0.07 | 1  |
| 7 C15H11.7             | RAQGEAASWK        | 30 | 1657  | 7.87 | 0.20 | 3  |

|            |                     |     |       |      |      |     |
|------------|---------------------|-----|-------|------|------|-----|
| 10 C15H9.6 | VLEDSDLK            | 24  | 2470  | 0.09 | 0.33 | 357 |
| 10 C15H9.6 | VLEDSDLK            | 30  | 5027  | 0.11 | 0.53 | 464 |
| 7 C15H9.6  | LIGRNTVIPTK         | 29  | 3439  | 0.26 | 0.12 | 48  |
| 7 C15H9.6  | SNKPSVEVK           | 17  | 4556  | 0.29 | 0.40 | 138 |
| 10 C15H9.6 | EIAESYL GK          | 66  | 10730 | 0.30 | 0.07 | 22  |
| 1 C15H9.6  | EIAESYL GK          | 62  | 5470  | 0.32 | 0.11 | 35  |
| 10 C15H9.6 | EIAESYL GK          | 44  | 7127  | 0.32 | 0.07 | 22  |
| 22 C15H9.6 | VLEDSDLK            | 23  | 4094  | 0.32 | 0.23 | 72  |
| 1 C15H9.6  | EIAESYL GK          | 62  | 6123  | 0.34 | 0.13 | 39  |
| 10 C15H9.6 | LIGRNTVIPTK         | 10  | 2461  | 0.36 | 0.16 | 45  |
| 22 C15H9.6 | VLEDSDLK            | 22  | 4078  | 0.37 | 0.33 | 88  |
| 10 C15H9.6 | LIGRNTVIPTK         | 16  | 13846 | 0.40 | 0.21 | 53  |
| 7 C15H9.6  | LIGRNTVIPTK         | 33  | 2811  | 0.41 | 0.14 | 33  |
| 10 C15H9.6 | QFTPEEVSAMVLVK      | 28  | 1074  | 0.43 | 0.26 | 61  |
| 7 C15H9.6  | SNKPSVEVK           | 33  | 11926 | 0.43 | 0.34 | 78  |
| 7 C15H9.6  | TVQADIK             | 22  | 2265  | 0.45 | 0.19 | 43  |
| 10 C15H9.6 | DDVHEIVLGGSTRIPK    | 21  | 3329  | 0.46 | 0.29 | 63  |
| 22 C15H9.6 | EIAESYL GK          | 51  | 20563 | 0.46 | 0.12 | 26  |
| 7 C15H9.6  | SNKPSVEVK           | 18  | 1813  | 0.47 | 0.21 | 44  |
| 7 C15H9.6  | SNKPSVEVK           | 18  | 1627  | 0.47 | 0.24 | 51  |
| 22 C15H9.6 | VLEDSDLK            | 12  | 1121  | 0.47 | 0.19 | 40  |
| 22 C15H9.6 | LIGRNTVIPTK         | 23  | 1585  | 0.48 | 0.14 | 30  |
| 7 C15H9.6  | EIAESYL GK          | 42  | 4495  | 0.48 | 0.09 | 19  |
| 10 C15H9.6 | SNKPSVEVK           | 27  | 3282  | 0.49 | 0.34 | 69  |
| 10 C15H9.6 | QFTPEEVSAMVLVK      | 43  | 1304  | 0.50 | 0.24 | 47  |
| 10 C15H9.6 | LIGRNTVIPTK         | 11  | 2625  | 0.50 | 0.10 | 20  |
| 7 C15H9.6  | EIAESYL GK          | 45  | 9836  | 0.50 | 0.05 | 11  |
| 1 C15H9.6  | LIGRNTVIPTK         | 17  | 1312  | 0.51 | 0.04 | 7   |
| 22 C15H9.6 | EIAESYL GK          | 51  | 15309 | 0.52 | 0.14 | 28  |
| 22 C15H9.6 | LIGRNTVIPTK         | 28  | 1626  | 0.52 | 0.25 | 48  |
| 10 C15H9.6 | QFTPEEVSAMVLVK      | 43  | 1243  | 0.52 | 0.17 | 32  |
| 10 C15H9.6 | QFTPEEVSAMVLVK      | 22  | 2297  | 0.54 | 0.14 | 26  |
| 10 C15H9.6 | QFTPEEVSAMVLVK      | 37  | 1729  | 0.55 | 0.09 | 16  |
| 22 C15H9.6 | AEARNELESYAYNLK     | 19  | 2483  | 0.55 | 0.54 | 97  |
| 22 C15H9.6 | EIAESYL GK          | 44  | 3704  | 0.57 | 0.08 | 14  |
| 22 C15H9.6 | QFTPEEVSAMVLVK      | 43  | 1644  | 0.57 | 0.18 | 31  |
| 22 C15H9.6 | LIGRNTVIPTK         | 18  | 1884  | 0.58 | 0.22 | 38  |
| 1 C15H9.6  | NQLTINPENTIFDAK     | 61  | 2678  | 0.59 | 0.21 | 36  |
| 1 C15H9.6  | LIGRNTVIPTK         | 19  | 1690  | 0.59 | 0.11 | 18  |
| 10 C15H9.6 | QFTPEEVSAMVLVK      | 103 | 2108  | 0.60 | 0.19 | 31  |
| 10 C15H9.6 | VQQLIK              | 20  | 10540 | 0.60 | 0.12 | 21  |
| 10 C15H9.6 | QFTPEEVSAMVLVK      | 59  | 1245  | 0.61 | 0.20 | 33  |
| 1 C15H9.6  | LIGRNTVIPTK         | 18  | 6652  | 0.61 | 0.28 | 46  |
| 10 C15H9.6 | QFTPEEVSAMVLVK      | 19  | 758   | 0.61 | 0.34 | 56  |
| 1 C15H9.6  | NQLTINPENTIFDAK     | 33  | 1386  | 0.63 | 0.20 | 32  |
| 10 C15H9.6 | QFTPEEVSAMVLVK      | 71  | 5953  | 0.64 | 0.11 | 18  |
| 10 C15H9.6 | AEARNELESYAYNLK     | 42  | 5952  | 0.64 | 0.10 | 15  |
| 7 C15H9.6  | NQLTINPENTIFDAK     | 20  | 1212  | 0.65 | 0.18 | 28  |
| 7 C15H9.6  | NQLTINPENTIFDAK     | 63  | 2412  | 0.67 | 0.16 | 24  |
| 7 C15H9.6  | NQLTINPENTIFDAK     | 59  | 2030  | 0.68 | 0.16 | 24  |
| 22 C15H9.6 | NQLTINPENTIFDAK     | 48  | 2183  | 0.69 | 0.12 | 18  |
| 22 C15H9.6 | AEARNELESYAYNLK     | 46  | 5703  | 0.70 | 0.15 | 21  |
| 1 C15H9.6  | QFTPEEVSAMVLVK      | 44  | 946   | 0.70 | 0.32 | 45  |
| 1 C15H9.6  | NQLTINPENTIFDAK     | 65  | 3691  | 0.70 | 0.14 | 20  |
| 1 C15H9.6  | LIGRNTVIPTK         | 18  | 2682  | 0.71 | 0.05 | 7   |
| 10 C15H9.6 | AEARNELESYAYNLK     | 46  | 6480  | 0.71 | 0.11 | 16  |
| 7 C15H9.6  | LIGRNTVIPTK         | 14  | 1930  | 0.71 | 0.08 | 12  |
| 7 C15H9.6  | LIGRNTVIPTK         | 15  | 1466  | 0.71 | 0.19 | 26  |
| 1 C15H9.6  | NAVVTVPAYFNDAQRQATK | 29  | 5291  | 0.72 | 0.10 | 13  |
| 7 C15H9.6  | EIAESYL GK          | 68  | 5309  | 0.72 | 0.06 | 8   |
| 10 C15H9.6 | AEARNELESYAYNLK     | 54  | 5727  | 0.72 | 0.12 | 16  |
| 1 C15H9.6  | LIGRNTVIPTK         | 20  | 2470  | 0.72 | 0.17 | 23  |
| 7 C15H9.6  | TVQADIK             | 15  | 1254  | 0.72 | 0.20 | 28  |
| 22 C15H9.6 | DDVHEIVLGGSTRIPK    | 34  | 10895 | 0.72 | 0.07 | 9   |
| 22 C15H9.6 | QFTPEEVSAMVLVK      | 16  | 2033  | 0.72 | 0.20 | 27  |
| 10 C15H9.6 | LIGRNTVIPTK         | 24  | 46561 | 0.73 | 0.12 | 17  |
| 7 C15H9.6  | NQLTINPENTIFDAK     | 63  | 2694  | 0.73 | 0.12 | 17  |
| 1 C15H9.6  | NQLTINPENTIFDAK     | 36  | 1066  | 0.73 | 0.12 | 17  |
| 7 C15H9.6  | EIAESYL GK          | 53  | 5730  | 0.73 | 0.08 | 11  |
| 7 C15H9.6  | NQLTINPENTIFDAK     | 52  | 1866  | 0.73 | 0.13 | 17  |
| 10 C15H9.6 | LIGRNTVIPTK         | 37  | 56916 | 0.74 | 0.11 | 15  |
| 22 C15H9.6 | QFTPEEVSAMVLVK      | 68  | 1742  | 0.74 | 0.16 | 22  |
| 7 C15H9.6  | TVQADIK             | 13  | 1101  | 0.75 | 0.23 | 31  |
| 10 C15H9.6 | AEARNELESYAYNLK     | 23  | 4116  | 0.77 | 0.06 | 7   |
| 10 C15H9.6 | NQLTINPENTIFDAK     | 15  | 734   | 0.78 | 0.11 | 15  |
| 1 C15H9.6  | NAVVTVPAYFNDAQRQATK | 10  | 4504  | 0.78 | 0.02 | 3   |
| 1 C15H9.6  | NAVVTVPAYFNDAQRQATK | 18  | 1251  | 0.78 | 0.14 | 18  |
| 22 C15H9.6 | QFTPEEVSAMVLVK      | 30  | 1910  | 0.78 | 0.14 | 18  |
| 22 C15H9.6 | NQLTINPENTIFDAK     | 26  | 1928  | 0.79 | 0.34 | 43  |
| 22 C15H9.6 | LIGRNTVIPTK         | 12  | 3155  | 0.79 | 0.16 | 20  |
| 1 C15H9.6  | EIAESYL GK          | 21  | 1030  | 0.79 | 0.11 | 14  |
| 22 C15H9.6 | LIGRNTVIPTK         | 17  | 4145  | 0.81 | 0.26 | 32  |
| 1 C15H9.6  | NQLTINPENTIFDAK     | 25  | 1106  | 0.81 | 0.21 | 26  |
| 22 C15H9.6 | AEARNELESYAYNLK     | 52  | 5657  | 0.81 | 0.05 | 7   |
| 22 C15H9.6 | QFTPEEVSAMVLVK      | 86  | 3021  | 0.82 | 0.19 | 23  |
| 10 C15H9.6 | QFTPEEVSAMVLVK      | 42  | 2219  | 0.82 | 0.11 | 13  |
| 7 C15H9.6  | EIAESYL GK          | 25  | 1432  | 0.82 | 0.09 | 11  |
| 22 C15H9.6 | QFTPEEVSAMVLVK      | 59  | 1685  | 0.84 | 0.14 | 17  |
| 7 C15H9.6  | LIGRNTVIPTK         | 26  | 4649  | 0.84 | 0.10 | 12  |
| 22 C15H9.6 | NQLTINPENTIFDAK     | 24  | 3911  | 0.86 | 0.19 | 22  |
| 10 C15H9.6 | QFTPEEVSAMVLVK      | 56  | 1689  | 0.86 | 0.17 | 20  |
| 22 C15H9.6 | NAVVTVPAYFNDAQRQATK | 48  | 5356  | 0.87 | 0.20 | 23  |
| 10 C15H9.6 | QFTPEEVSAMVLVK      | 59  | 2611  | 0.87 | 0.11 | 13  |
| 10 C15H9.6 | NAVVTVPAYFNDAQRQATK | 37  | 4231  | 0.87 | 0.08 | 9   |
| 10 C15H9.6 | NQLTINPENTIFDAK     | 48  | 3020  | 0.88 | 0.23 | 26  |
| 22 C15H9.6 | NQLTINPENTIFDAK     | 12  | 1210  | 0.88 | 0.28 | 32  |
| 10 C15H9.6 | RLIGRDYNDK          | 12  | 13534 | 0.88 | 0.08 | 9   |
| 1 C15H9.6  | NQLTINPENTIFDAK     | 45  | 1699  | 0.90 | 0.17 | 19  |
| 7 C15H9.6  | QFTPEEVSAMVLVK      | 20  | 440   | 0.90 | 0.19 | 21  |
| 7 C15H9.6  | SNKPSVEVK           | 14  | 2472  | 0.91 | 0.31 | 34  |
| 7 C15H9.6  | NAVVTVPAYFNDAQRQATK | 12  | 5905  | 0.91 | 0.10 | 11  |

|            |                     |    |       |      |      |    |
|------------|---------------------|----|-------|------|------|----|
| 10 C15H9.6 | QFTPEEVSAMVLVK      | 27 | 1420  | 0.91 | 0.14 | 15 |
| 22 C15H9.6 | TVQADIK             | 16 | 5456  | 0.93 | 0.17 | 19 |
| 22 C15H9.6 | QFTPEEVSAMVLVK      | 48 | 5020  | 0.93 | 0.10 | 11 |
| 10 C15H9.6 | LIGRNTVIPTK         | 23 | 8316  | 0.93 | 0.08 | 9  |
| 22 C15H9.6 | NAVVTVPAYFNDAQRQATK | 13 | 9390  | 0.93 | 0.22 | 23 |
| 7 C15H9.6  | VQQLIK              | 12 | 2093  | 0.93 | 0.12 | 13 |
| 22 C15H9.6 | QFTPEEVSAMVLVK      | 66 | 2143  | 0.94 | 0.18 | 19 |
| 22 C15H9.6 | FEELNMDLFRATLKPVQK  | 12 | 2703  | 0.95 | 0.15 | 15 |
| 1 C15H9.6  | LIGRNTVIPTK         | 23 | 2689  | 0.96 | 0.57 | 59 |
| 22 C15H9.6 | NAVVTVPAYFNDAQRQATK | 39 | 4207  | 0.96 | 0.13 | 14 |
| 1 C15H9.6  | QFTPEEVSAMVLVK      | 45 | 650   | 0.97 | 0.25 | 26 |
| 7 C15H9.6  | NAVVTVPAYFNDAQRQATK | 41 | 2418  | 0.97 | 0.17 | 18 |
| 22 C15H9.6 | QFTPEEVSAMVLVK      | 39 | 2503  | 0.97 | 0.14 | 14 |
| 22 C15H9.6 | QFTPEEVSAMVLVK      | 20 | 1559  | 0.99 | 0.09 | 9  |
| 7 C15H9.6  | NAVVTVPAYFNDAQRQATK | 46 | 2533  | 0.99 | 0.21 | 21 |
| 22 C15H9.6 | NQLTINPENTIFDAK     | 40 | 3064  | 1.00 | 0.14 | 14 |
| 1 C15H9.6  | NQLTINPENTIFDAK     | 58 | 1301  | 1.01 | 0.26 | 25 |
| 1 C15H9.6  | NAVVTVPAYFNDAQRQATK | 16 | 1312  | 1.01 | 0.15 | 15 |
| 22 C15H9.6 | DDVHEIVLVGGSTRIPK   | 28 | 12129 | 1.01 | 0.21 | 20 |
| 7 C15H9.6  | DDVHEIVLVGGSTRIPK   | 23 | 5543  | 1.02 | 0.29 | 28 |
| 7 C15H9.6  | LIGRNTVIPTK         | 26 | 5327  | 1.03 | 0.12 | 11 |
| 22 C15H9.6 | NQLTINPENTIFDAK     | 28 | 7372  | 1.04 | 0.16 | 16 |
| 7 C15H9.6  | LIGRNTVIPTK         | 26 | 4760  | 1.04 | 0.17 | 16 |
| 7 C15H9.6  | NAVVTVPAYFNDAQRQATK | 15 | 4083  | 1.04 | 0.07 | 6  |
| 10 C15H9.6 | NAVVTVPAYFNDAQRQATK | 48 | 6231  | 1.06 | 0.15 | 14 |
| 22 C15H9.6 | EIAESYL GK          | 55 | 4560  | 1.07 | 0.15 | 14 |
| 10 C15H9.6 | NQLTINPENTIFDAK     | 34 | 2237  | 1.08 | 0.29 | 27 |
| 10 C15H9.6 | NQLTINPENTIFDAK     | 49 | 3172  | 1.08 | 0.19 | 17 |
| 10 C15H9.6 | NAVVTVPAYFNDAQRQATK | 10 | 6573  | 1.08 | 0.15 | 13 |
| 1 C15H9.6  | NQLTINPENTIFDAK     | 33 | 868   | 1.08 | 0.20 | 18 |
| 7 C15H9.6  | LIGRNTVIPTK         | 27 | 5171  | 1.09 | 0.12 | 11 |
| 10 C15H9.6 | NQLTINPENTIFDAK     | 51 | 3266  | 1.09 | 0.10 | 9  |
| 22 C15H9.6 | LIGRNTVIPTK         | 18 | 2732  | 1.10 | 0.15 | 14 |
| 10 C15H9.6 | NQLTINPENTIFDAK     | 23 | 1717  | 1.10 | 0.09 | 9  |
| 10 C15H9.6 | LIGRNTVIPTK         | 10 | 5303  | 1.11 | 0.11 | 10 |
| 10 C15H9.6 | EIAESYL GK          | 37 | 2079  | 1.12 | 0.09 | 8  |
| 7 C15H9.6  | VQQLIK              | 16 | 1762  | 1.12 | 0.14 | 12 |
| 10 C15H9.6 | NQLTINPENTIFDAK     | 50 | 2435  | 1.14 | 0.09 | 8  |
| 10 C15H9.6 | LIGRNTVIPTK         | 10 | 4547  | 1.14 | 0.33 | 29 |
| 22 C15H9.6 | QFTPEEVSAMVLVK      | 25 | 1354  | 1.14 | 0.14 | 12 |
| 7 C15H9.6  | LIGRNTVIPTK         | 20 | 4225  | 1.14 | 0.19 | 16 |
| 22 C15H9.6 | NAVVTVPAYFNDAQRQATK | 13 | 13768 | 1.15 | 0.22 | 19 |
| 7 C15H9.6  | NQLTINPENTIFDAK     | 47 | 1976  | 1.15 | 0.17 | 15 |
| 22 C15H9.6 | NAVVTVPAYFNDAQRQATK | 41 | 3409  | 1.16 | 0.13 | 12 |
| 7 C15H9.6  | VQQLIK              | 36 | 5188  | 1.16 | 0.07 | 6  |
| 7 C15H9.6  | NQLTINPENTIFDAK     | 79 | 3618  | 1.16 | 0.17 | 14 |
| 22 C15H9.6 | RLIGRDYNDK          | 13 | 20874 | 1.19 | 0.15 | 12 |
| 22 C15H9.6 | NQLTINPENTIFDAK     | 29 | 4836  | 1.19 | 0.14 | 12 |
| 7 C15H9.6  | RLIGRDYNDK          | 11 | 29324 | 1.19 | 0.12 | 10 |
| 1 C15H9.6  | NQLTINPENTIFDAK     | 13 | 660   | 1.19 | 0.10 | 8  |
| 1 C15H9.6  | NQLTINPENTIFDAK     | 43 | 1516  | 1.20 | 0.08 | 7  |
| 22 C15H9.6 | QFTPEEVSAMVLVK      | 24 | 1606  | 1.22 | 0.09 | 7  |
| 10 C15H9.6 | EIAESYL GK          | 54 | 2892  | 1.22 | 0.07 | 6  |
| 7 C15H9.6  | NQLTINPENTIFDAK     | 59 | 1428  | 1.22 | 0.10 | 8  |
| 7 C15H9.6  | NQLTINPENTIFDAK     | 20 | 3377  | 1.23 | 0.18 | 15 |
| 22 C15H9.6 | NQLTINPENTIFDAK     | 69 | 3006  | 1.24 | 0.15 | 12 |
| 7 C15H9.6  | NQLTINPENTIFDAK     | 24 | 984   | 1.24 | 0.11 | 9  |
| 1 C15H9.6  | EIAESYL GK          | 38 | 1001  | 1.25 | 0.18 | 15 |
| 10 C15H9.6 | NQLTINPENTIFDAK     | 58 | 2558  | 1.25 | 0.14 | 11 |
| 22 C15H9.6 | LIGRNTVIPTK         | 18 | 1824  | 1.26 | 0.09 | 7  |
| 7 C15H9.6  | NQLTINPENTIFDAK     | 76 | 3988  | 1.28 | 0.16 | 13 |
| 22 C15H9.6 | NQLTINPENTIFDAK     | 22 | 4672  | 1.29 | 0.11 | 9  |
| 7 C15H9.6  | LIGRNTVIPTK         | 11 | 3193  | 1.31 | 0.09 | 7  |
| 22 C15H9.6 | EIAESYL GK          | 55 | 4050  | 1.32 | 0.08 | 6  |
| 1 C15H9.6  | VQQLIK              | 18 | 4019  | 1.32 | 0.12 | 9  |
| 7 C15H9.6  | NQLTINPENTIFDAK     | 31 | 3515  | 1.33 | 0.09 | 7  |
| 7 C15H9.6  | NAVVTVPAYFNDAQRQATK | 34 | 1931  | 1.34 | 0.19 | 14 |
| 22 C15H9.6 | NQLTINPENTIFDAK     | 22 | 3382  | 1.35 | 0.11 | 8  |
| 22 C15H9.6 | NAVVTVPAYFNDAQRQATK | 56 | 3934  | 1.36 | 0.07 | 5  |
| 22 C15H9.6 | NQLTINPENTIFDAK     | 29 | 5532  | 1.37 | 0.15 | 11 |
| 22 C15H9.6 | DDVHEIVLVGGSTRIPK   | 10 | 3542  | 1.37 | 0.30 | 22 |
| 22 C15H9.6 | QFTPEEVSAMVLVK      | 61 | 1428  | 1.39 | 0.34 | 24 |
| 7 C15H9.6  | LIGRNTVIPTK         | 11 | 1846  | 1.42 | 0.25 | 18 |
| 7 C15H9.6  | NQLTINPENTIFDAK     | 26 | 3535  | 1.42 | 0.18 | 13 |
| 22 C15H9.6 | NQLTINPENTIFDAK     | 13 | 1341  | 1.43 | 0.19 | 13 |
| 22 C15H9.6 | NQLTINPENTIFDAK     | 31 | 4914  | 1.46 | 0.09 | 7  |
| 7 C15H9.6  | NQLTINPENTIFDAK     | 21 | 2293  | 1.46 | 0.20 | 14 |
| 1 C15H9.6  | NQLTINPENTIFDAK     | 48 | 1391  | 1.48 | 0.39 | 27 |
| 22 C15H9.6 | NQLTINPENTIFDAK     | 38 | 1469  | 1.48 | 0.12 | 8  |
| 7 C15H9.6  | NAVVTVPAYFNDAQRQATK | 22 | 5036  | 1.50 | 0.25 | 17 |
| 22 C15H9.6 | NQLTINPENTIFDAK     | 71 | 5816  | 1.50 | 0.17 | 11 |
| 22 C15H9.6 | NQLTINPENTIFDAK     | 29 | 2671  | 1.51 | 0.15 | 10 |
| 22 C15H9.6 | EIAESYL GK          | 44 | 3979  | 1.56 | 0.06 | 4  |
| 22 C15H9.6 | EIAESYL GK          | 54 | 3922  | 1.58 | 0.05 | 3  |
| 22 C15H9.6 | LIGRNTVIPTK         | 10 | 4397  | 1.58 | 0.20 | 13 |
| 10 C15H9.6 | NQLTINPENTIFDAK     | 54 | 2630  | 1.59 | 0.09 | 6  |
| 22 C15H9.6 | VQQLIK              | 18 | 4758  | 1.61 | 0.11 | 7  |
| 22 C15H9.6 | TVQADIK             | 11 | 4042  | 1.63 | 0.21 | 13 |
| 7 C15H9.6  | VQQLIK              | 23 | 1826  | 1.66 | 0.07 | 4  |
| 22 C15H9.6 | VQQLIK              | 15 | 3346  | 1.70 | 0.19 | 11 |
| 10 C15H9.6 | NQLTINPENTIFDAK     | 51 | 2496  | 1.75 | 0.19 | 11 |
| 10 C15H9.6 | VQQLIK              | 14 | 2975  | 1.81 | 0.20 | 11 |
| 7 C15H9.6  | NAVVTVPAYFNDAQRQATK | 27 | 1978  | 1.83 | 0.16 | 9  |
| 1 C15H9.6  | LIGRNTVIPTK         | 31 | 2758  | 1.84 | 0.17 | 9  |
| 7 C15H9.6  | NQLTINPENTIFDAK     | 76 | 1726  | 1.89 | 0.24 | 13 |
| 10 C15H9.6 | VQQLIK              | 22 | 2920  | 1.95 | 0.10 | 5  |
| 10 C15H9.6 | VQQLIK              | 12 | 1853  | 1.95 | 0.16 | 8  |
| 7 C15H9.6  | LIGRNTVIPTK         | 20 | 2447  | 2.01 | 0.09 | 5  |
| 7 C15H9.6  | LIGRNTVIPTK         | 22 | 2187  | 2.02 | 0.23 | 11 |
| 10 C15H9.6 | VQQLIK              | 15 | 2736  | 2.04 | 0.08 | 4  |
| 1 C15H9.6  | LIGRNTVIPTK         | 14 | 1943  | 2.07 | 0.19 | 9  |

|                                  |                    |     |       |      |      |    |
|----------------------------------|--------------------|-----|-------|------|------|----|
| 10 C15H9.6                       | VQQLIK             | 15  | 2560  | 2.08 | 0.05 | 2  |
| 10 C15H9.6                       | LIGRNTV/PTK        | 15  | 1683  | 2.08 | 0.08 | 4  |
| 22 C15H9.6                       | VQQLIK             | 18  | 3055  | 2.30 | 0.09 | 4  |
| 7 C15H9.6                        | LIGRNTV/PTK        | 12  | 1281  | 2.38 | 0.08 | 4  |
| 1 C15H9.6                        | VQQLIK             | 11  | 1116  | 2.39 | 0.18 | 8  |
| 22 C15H9.6                       | VQQLIK             | 18  | 3651  | 2.51 | 0.12 | 5  |
| 10 C15H9.6                       | LIGRNTV/PTK        | 21  | 3179  | 2.52 | 0.07 | 3  |
| 22 C15H9.6                       | VQQLIK             | 15  | 2647  | 2.54 | 0.05 | 2  |
| 22 C15H9.6                       | RLIGRDYNDK         | 12  | 23953 | 3.10 | 0.11 | 3  |
| 22 C15H9.6                       | VQQLIK             | 17  | 2315  | 4.31 | 0.09 | 2  |
| 10 C15H9.6                       | QFTPEEVSAMVLVK     | 31  | 1359  | 5.20 | 0.36 | 7  |
| 10 C15H9.6                       | VQQLIK             | 19  | 2124  | 5.54 | 0.07 | 1  |
| 22 C15H9.6                       | VQQLIK             | 27  | 3206  | 5.59 | 0.10 | 2  |
| 10 C15H9.6                       | QFTPEEVSAMVLVK     | 18  | 1259  | 6.70 | 0.13 | 2  |
| 10 C15H9.6                       | QFTPEEVSAMVLVK     | 21  | 1463  | 7.10 | 0.37 | 5  |
| 10 C15H9.6                       | QFTPEEVSAMVLVK     | 27  | 1390  | 7.46 | 0.26 | 3  |
| 1 C16A3.10a;C16A3.10b            | LLAHYHDNVRPDIVVLGK | 22  | 2228  | 0.38 | 0.15 | 39 |
| 1 C16A3.10a;C16A3.10b            | LLAHYHDNVRPDIVVLGK | 15  | 1846  | 0.47 | 0.24 | 50 |
| 1 C16A3.10a;C16A3.10b            | LLAHYHDNVRPDIVVLGK | 18  | 7807  | 0.53 | 0.15 | 29 |
| 22 C16A3.10a;C16A3.10b           | VAIAALEILQEEK      | 34  | 2837  | 0.53 | 0.09 | 16 |
| 1 C16A3.10a;C16A3.10b            | LLAHYHDNVRPDIVVLGK | 21  | 7665  | 0.54 | 0.37 | 69 |
| 22 C16A3.10a;C16A3.10b           | LLAHYHDNVRPDIVVLGK | 18  | 7667  | 0.57 | 0.25 | 44 |
| 22 C16A3.10a;C16A3.10b           | LLAHYHDNVRPDIVVLGK | 28  | 8322  | 0.60 | 0.27 | 45 |
| 1 C16A3.10a;C16A3.10b            | LLAHYHDNVRPDIVVLGK | 19  | 2409  | 0.63 | 0.24 | 38 |
| 22 C16A3.10a;C16A3.10b           | EQVEQAADIIK        | 84  | 2048  | 0.64 | 0.13 | 20 |
| 22 C16A3.10a;C16A3.10b           | LLAHYHDNVRPDIVVLGK | 22  | 16630 | 0.65 | 0.18 | 28 |
| 22 C16A3.10a;C16A3.10b           | VAIAALEILQEEK      | 83  | 4590  | 0.68 | 0.19 | 27 |
| 22 C16A3.10a;C16A3.10b           | EQVEQAADIIK        | 58  | 2302  | 0.71 | 0.19 | 26 |
| 22 C16A3.10a;C16A3.10b           | LLAHYHDNVRPDIVVLGK | 34  | 10697 | 0.77 | 0.21 | 28 |
| 1 C16A3.10a;C16A3.10b            | VAIAALEILQEEK      | 77  | 3134  | 0.81 | 0.13 | 16 |
| 1 C16A3.10a;C16A3.10b            | VAIAALEILQEEK      | 57  | 2957  | 0.85 | 0.10 | 12 |
| 1 C16A3.10a;C16A3.10b            | LLAHYHDNVRPDIVVLGK | 12  | 2227  | 0.87 | 0.26 | 30 |
| 22 C16A3.10a;C16A3.10b           | VAIAALEILQEEK      | 63  | 3128  | 0.87 | 0.19 | 21 |
| 22 C16A3.10a;C16A3.10b           | DIVSTVRGK          | 13  | 5717  | 0.92 | 0.32 | 35 |
| 1 C16A3.10a;C16A3.10b            | EQVEQAADIIK        | 58  | 1489  | 0.94 | 0.11 | 12 |
| 22 C16A3.10a;C16A3.10b           | VAIAALEILQEEK      | 91  | 3948  | 0.95 | 0.14 | 14 |
| 22 C16A3.10a;C16A3.10b           | EQVEQAADIIK        | 83  | 5032  | 1.05 | 0.09 | 9  |
| 22 C16A3.10a;C16A3.10b           | EQVEQAADIIK        | 80  | 4134  | 1.06 | 0.11 | 10 |
| 1 C16A3.10a;C16A3.10b            | EQVEQAADIIK        | 64  | 1594  | 1.09 | 0.14 | 13 |
| 22 C16A3.10a;C16A3.10b           | LVENSAVMGDLLMSK    | 15  | 480   | 1.09 | 0.20 | 18 |
| 22 C16A3.10a;C16A3.10b           | LVENSAVMGDLLMSK    | 77  | 2148  | 1.18 | 0.14 | 12 |
| 1 C16A3.10a;C16A3.10b            | VAIAALEILQEEK      | 55  | 1491  | 1.28 | 0.12 | 9  |
| 22 C16A3.10a;C16A3.10b           | LVENSAVMGDLLMSK    | 77  | 2053  | 1.32 | 0.15 | 11 |
| 1 C16A3.10a;C16A3.10b            | LLAHYHDNVRPDIVVLGK | 16  | 3463  | 1.37 | 0.08 | 6  |
| 1 C16A3.10a;C16A3.10b            | VAIAALEILQEEK      | 56  | 1063  | 1.85 | 0.17 | 9  |
| 10 C16A3.10a;C16A3.10b;C16A3.10c | LLAHYHDNVRPDIVVLGK | 23  | 20049 | 0.32 | 0.08 | 25 |
| 7 C16A3.10a;C16A3.10b;C16A3.10c  | LLAHYHDNVRPDIVVLGK | 30  | 9432  | 0.37 | 0.11 | 31 |
| 10 C16A3.10a;C16A3.10b;C16A3.10c | VAIAALEILQEEK      | 56  | 2703  | 0.57 | 0.19 | 34 |
| 7 C16A3.10a;C16A3.10b;C16A3.10c  | LLAHYHDNVRPDIVVLGK | 24  | 5183  | 0.60 | 0.06 | 9  |
| 10 C16A3.10a;C16A3.10b;C16A3.10c | EQVEQAADIIK        | 46  | 2033  | 0.63 | 0.11 | 17 |
| 10 C16A3.10a;C16A3.10b;C16A3.10c | LLAHYHDNVRPDIVVLGK | 26  | 10617 | 0.63 | 0.25 | 39 |
| 10 C16A3.10a;C16A3.10b;C16A3.10c | VAIAALEILQEEK      | 70  | 2701  | 0.64 | 0.08 | 13 |
| 10 C16A3.10a;C16A3.10b;C16A3.10c | LLAHYHDNVRPDIVVLGK | 14  | 19715 | 0.70 | 0.23 | 33 |
| 10 C16A3.10a;C16A3.10b;C16A3.10c | LLAHYHDNVRPDIVVLGK | 25  | 21462 | 0.73 | 0.30 | 41 |
| 10 C16A3.10a;C16A3.10b;C16A3.10c | VAIAALEILQEEK      | 60  | 2870  | 0.75 | 0.26 | 34 |
| 7 C16A3.10a;C16A3.10b;C16A3.10c  | VAIAALEILQEEK      | 46  | 2273  | 0.75 | 0.20 | 26 |
| 10 C16A3.10a;C16A3.10b;C16A3.10c | VAIAALEILQEEK      | 64  | 2939  | 0.76 | 0.11 | 14 |
| 10 C16A3.10a;C16A3.10b;C16A3.10c | DIVSTVRGK          | 19  | 20623 | 0.76 | 0.27 | 36 |
| 10 C16A3.10a;C16A3.10b;C16A3.10c | LLAHYHDNVRPDIVVLGK | 23  | 8193  | 0.84 | 0.03 | 3  |
| 10 C16A3.10a;C16A3.10b;C16A3.10c | EQVEQAADIIK        | 97  | 4033  | 0.85 | 0.07 | 8  |
| 10 C16A3.10a;C16A3.10b;C16A3.10c | EQVEQAADIIK        | 98  | 2877  | 0.85 | 0.08 | 9  |
| 7 C16A3.10a;C16A3.10b;C16A3.10c  | VAIAALEILQEEK      | 59  | 1971  | 0.89 | 0.17 | 19 |
| 10 C16A3.10a;C16A3.10b;C16A3.10c | EQVEQAADIIK        | 101 | 3705  | 0.93 | 0.09 | 10 |
| 10 C16A3.10a;C16A3.10b;C16A3.10c | LVENSAVMGDLLMSK    | 53  | 1488  | 1.02 | 0.18 | 18 |
| 10 C16A3.10a;C16A3.10b;C16A3.10c | DIVSTVRGK          | 14  | 7128  | 1.10 | 0.29 | 26 |
| 10 C16A3.10a;C16A3.10b;C16A3.10c | LLAHYHDNVRPDIVVLGK | 16  | 16806 | 1.12 | 0.10 | 9  |
| 10 C16A3.10a;C16A3.10b;C16A3.10c | EQVEQAADIIK        | 65  | 3038  | 1.17 | 0.15 | 12 |
| 10 C16A3.10a;C16A3.10b;C16A3.10c | LLAHYHDNVRPDIVVLGK | 19  | 11381 | 1.17 | 0.29 | 25 |
| 10 C16A3.10a;C16A3.10b;C16A3.10c | LLAHYHDNVRPDIVVLGK | 23  | 12858 | 1.18 | 0.15 | 13 |
| 7 C16A3.10a;C16A3.10b;C16A3.10c  | LLAHYHDNVRPDIVVLGK | 16  | 10308 | 1.24 | 0.33 | 27 |
| 10 C16A3.10a;C16A3.10b;C16A3.10c | TVPYNNLK           | 11  | 15876 | 1.34 | 0.14 | 11 |
| 10 C16A3.10a;C16A3.10b;C16A3.10c | VAIAALEILQEEK      | 80  | 2760  | 1.35 | 0.21 | 16 |
| 10 C16A3.10a;C16A3.10b;C16A3.10c | LLAHYHDNVRPDIVVLGK | 15  | 7261  | 1.61 | 0.39 | 25 |
| 10 C16A3.10a;C16A3.10b;C16A3.10c | VAIAALEILQEEK      | 76  | 1928  | 1.61 | 0.14 | 9  |
| 7 C16A3.10a;C16A3.10b;C16A3.10c  | LLAHYHDNVRPDIVVLGK | 12  | 9475  | 1.63 | 0.17 | 10 |
| 7 C16A3.10a;C16A3.10b;C16A3.10c  | VAIAALEILQEEK      | 58  | 2847  | 1.68 | 0.20 | 12 |
| 10 C16A3.10a;C16A3.10b;C16A3.10c | LLAHYHDNVRPDIVVLGK | 11  | 10195 | 1.81 | 0.15 | 8  |
| 7 C16A3.10a;C16A3.10b;C16A3.10c  | VAIAALEILQEEK      | 70  | 3336  | 1.91 | 0.10 | 5  |
| 10 C16A3.10a;C16A3.10b;C16A3.10c | LLAHYHDNVRPDIVVLGK | 19  | 11632 | 6.02 | 0.73 | 12 |
| 22 C16C10.10                     | TIDFFTNVNLMMK      | 59  | 938   | 0.32 | 0.13 | 41 |
| 22 C16C10.10                     | VLRHEEFK           | 22  | 5229  | 1.20 | 0.18 | 15 |
| 10 C17B7.11                      | LDPLDLLASRK        | 16  | 1937  | 1.36 | 0.15 | 11 |
| 22 C17G1.7                       | IQGIGAGFAPAVLDTK   | 18  | 1809  | 0.66 | 0.20 | 31 |
| 1 C17G1.7                        | IQGIGAGFAPAVLDTK   | 24  | 611   | 0.74 | 0.17 | 23 |
| 1 C17G1.7                        | GAIDMANQLK         | 15  | 1628  | 0.76 | 0.11 | 14 |
| 22 C17G1.7                       | IQGIGAGFAPAVLDTK   | 18  | 2138  | 0.81 | 0.23 | 29 |
| 1 C17G1.7                        | GAIDMANQLK         | 33  | 1624  | 0.91 | 0.31 | 34 |
| 7 C17G1.7                        | IQGIGAGFAPAVLDTK   | 22  | 944   | 0.94 | 0.22 | 23 |
| 10 C17G1.7                       | IQGIGAGFAPAVLDTK   | 24  | 1658  | 0.95 | 0.16 | 17 |
| 1 C17G1.7                        | GAIDMANQLK         | 48  | 2882  | 0.98 | 0.16 | 16 |
| 10 C17G1.7                       | GAIDMANQLK         | 39  | 5524  | 1.07 | 0.07 | 7  |
| 7 C17G1.7                        | GAIDMANQLK         | 17  | 3067  | 1.07 | 0.15 | 14 |
| 10 C17G1.7                       | GAIDMANQLK         | 58  | 5288  | 1.13 | 0.07 | 6  |
| 1 C17G1.7                        | GAIDMANQLK         | 17  | 1158  | 1.15 | 0.62 | 54 |
| 22 C17G1.7                       | GAIDMANQLK         | 47  | 4939  | 1.19 | 0.07 | 6  |
| 1 C17G1.7                        | GAIDMANQLK         | 39  | 2347  | 1.20 | 0.11 | 9  |
| 7 C17G1.7                        | GAIDMANQLK         | 15  | 3078  | 1.22 | 0.14 | 12 |
| 22 C17G1.7                       | GAIDMANQLK         | 44  | 4795  | 1.25 | 0.03 | 3  |
| 7 C17G1.7                        | IQGIGAGFAPAVLDTK   | 34  | 1845  | 1.25 | 0.21 | 17 |
| 10 C17G1.7                       | IQGIGAGFAPAVLDTK   | 16  | 989   | 1.29 | 0.16 | 12 |
| 10 C17G1.7                       | GAIDMANQLK         | 53  | 9567  | 1.32 | 0.06 | 5  |

|              |                      |     |       |      |      |     |
|--------------|----------------------|-----|-------|------|------|-----|
| 10 C17G1.7   | DRIGAAMLAAAEK        | 33  | 4491  | 1.66 | 0.16 | 10  |
| 22 C17G1.7   | DRIGAAMLAAAEK        | 10  | 1575  | 1.74 | 0.15 | 8   |
| 10 C17H12.14 | IMEFFEK              | 27  | 1750  | 0.20 | 0.25 | 122 |
| 22 C17H12.14 | IMEFFEK              | 31  | 3409  | 0.25 | 0.10 | 39  |
| 1 C17H12.14  | AEEEFNIEK            | 16  | 2154  | 0.28 | 0.20 | 72  |
| 10 C17H12.14 | IMEFFEK              | 27  | 4129  | 0.32 | 0.07 | 22  |
| 10 C17H12.14 | IMEFFEK              | 26  | 1350  | 0.34 | 0.10 | 28  |
| 10 C17H12.14 | IMEFFEK              | 31  | 5021  | 0.35 | 0.08 | 24  |
| 10 C17H12.14 | GLVMQGLLQLEK         | 71  | 1209  | 0.36 | 0.25 | 69  |
| 10 C17H12.14 | QLRHMMAFIEQEANEK     | 47  | 7431  | 0.37 | 0.18 | 48  |
| 22 C17H12.14 | QNFLPSESAGGVELSARAGK | 72  | 4640  | 0.38 | 0.11 | 30  |
| 22 C17H12.14 | IMEFFEK              | 34  | 4096  | 0.38 | 0.13 | 35  |
| 10 C17H12.14 | GLVMQGLLQLEK         | 79  | 1524  | 0.40 | 0.15 | 37  |
| 22 C17H12.14 | QNFLPSESAGGVELSARAGK | 71  | 4335  | 0.45 | 0.07 | 16  |
| 22 C17H12.14 | DRLRVEQLLPECLDGLQK   | 15  | 2281  | 0.46 | 0.32 | 69  |
| 22 C17H12.14 | IMEFFEK              | 25  | 3750  | 0.47 | 0.08 | 18  |
| 22 C17H12.14 | QVELQRK              | 29  | 3516  | 0.48 | 0.08 | 17  |
| 10 C17H12.14 | QLRHMMAFIEQEANEK     | 33  | 8071  | 0.48 | 0.14 | 28  |
| 22 C17H12.14 | IMEFFEK              | 30  | 3587  | 0.49 | 0.08 | 16  |
| 22 C17H12.14 | QVELQRK              | 26  | 3747  | 0.50 | 0.05 | 11  |
| 10 C17H12.14 | QLRHMMAFIEQEANEK     | 41  | 8570  | 0.52 | 0.11 | 21  |
| 22 C17H12.14 | QNFLPSESAGGVELSARAGK | 15  | 3551  | 0.53 | 0.21 | 39  |
| 1 C17H12.14  | QNFLPSESAGGVELSARAGK | 43  | 1934  | 0.54 | 0.10 | 18  |
| 22 C17H12.14 | QLRHMMAFIEQEANEK     | 24  | 2236  | 0.55 | 0.43 | 77  |
| 22 C17H12.14 | IMEFFEK              | 26  | 2403  | 0.56 | 0.07 | 13  |
| 1 C17H12.14  | IMEFFEK              | 16  | 385   | 0.60 | 0.12 | 19  |
| 10 C17H12.14 | IMEFFEK              | 25  | 1873  | 0.60 | 0.14 | 23  |
| 10 C17H12.14 | IMEFFEK              | 29  | 2281  | 0.61 | 0.14 | 22  |
| 1 C17H12.14  | IMEFFEK              | 18  | 528   | 0.62 | 0.21 | 34  |
| 1 C17H12.14  | QNFLPSESAGGVELSARAGK | 70  | 2229  | 0.63 | 0.14 | 22  |
| 10 C17H12.14 | GLVMQGLLQLEK         | 105 | 14158 | 0.63 | 0.09 | 14  |
| 1 C17H12.14  | IMEFFEK              | 12  | 305   | 0.63 | 0.19 | 30  |
| 22 C17H12.14 | QLRHMMAFIEQEANEK     | 33  | 8981  | 0.63 | 0.11 | 18  |
| 22 C17H12.14 | GLVMQGLLQLEK         | 97  | 15152 | 0.65 | 0.09 | 13  |
| 22 C17H12.14 | QLRHMMAFIEQEANEK     | 27  | 6231  | 0.67 | 0.08 | 12  |
| 7 C17H12.14  | QLRHMMAFIEQEANEK     | 57  | 8543  | 0.69 | 0.15 | 22  |
| 10 C17H12.14 | QLRHMMAFIEQEANEK     | 55  | 22540 | 0.69 | 0.12 | 17  |
| 10 C17H12.14 | GLVMQGLLQLEK         | 109 | 12840 | 0.69 | 0.06 | 9   |
| 22 C17H12.14 | GLVMQGLLQLEK         | 108 | 14841 | 0.70 | 0.07 | 10  |
| 22 C17H12.14 | QLRHMMAFIEQEANEK     | 47  | 4519  | 0.72 | 0.13 | 19  |
| 1 C17H12.14  | IMEFFEK              | 16  | 427   | 0.74 | 0.15 | 20  |
| 1 C17H12.14  | GLVMQGLLQLEK         | 45  | 723   | 0.74 | 0.37 | 50  |
| 1 C17H12.14  | QLRHMMAFIEQEANEK     | 18  | 3786  | 0.75 | 0.12 | 17  |
| 1 C17H12.14  | QLRHMMAFIEQEANEK     | 53  | 6177  | 0.77 | 0.22 | 28  |
| 7 C17H12.14  | QLRHMMAFIEQEANEK     | 55  | 8651  | 0.79 | 0.23 | 29  |
| 1 C17H12.14  | QLRHMMAFIEQEANEK     | 21  | 6716  | 0.80 | 0.11 | 13  |
| 10 C17H12.14 | IMEFFEK              | 45  | 9730  | 0.80 | 0.07 | 9   |
| 22 C17H12.14 | IMEFFEK              | 21  | 3193  | 0.83 | 0.09 | 11  |
| 10 C17H12.14 | IMEFFEK              | 55  | 12836 | 0.83 | 0.07 | 9   |
| 22 C17H12.14 | QLRHMMAFIEQEANEK     | 25  | 11185 | 0.83 | 0.14 | 17  |
| 7 C17H12.14  | IMEFFEK              | 11  | 714   | 0.85 | 0.08 | 9   |
| 1 C17H12.14  | QLRHMMAFIEQEANEK     | 44  | 5000  | 0.86 | 0.11 | 13  |
| 22 C17H12.14 | QLRHMMAFIEQEANEK     | 32  | 9082  | 0.87 | 0.15 | 17  |
| 1 C17H12.14  | GLVMQGLLQLEK         | 59  | 1042  | 0.87 | 0.16 | 18  |
| 10 C17H12.14 | IMEFFEK              | 44  | 6758  | 0.87 | 0.08 | 10  |
| 22 C17H12.14 | QLRHMMAFIEQEANEK     | 21  | 8888  | 0.87 | 0.12 | 14  |
| 10 C17H12.14 | QNFLPSESAGGVELSARAGK | 44  | 5929  | 0.88 | 0.12 | 14  |
| 22 C17H12.14 | GLVMQGLLQLEK         | 81  | 2488  | 0.92 | 0.10 | 11  |
| 10 C17H12.14 | IMEFFEK              | 48  | 10752 | 0.92 | 0.08 | 9   |
| 1 C17H12.14  | GLVMQGLLQLEK         | 58  | 1388  | 0.94 | 0.09 | 10  |
| 22 C17H12.14 | QLRHMMAFIEQEANEK     | 26  | 9886  | 0.95 | 0.13 | 13  |
| 1 C17H12.14  | QLRHMMAFIEQEANEK     | 41  | 2137  | 0.97 | 0.44 | 45  |
| 7 C17H12.14  | QLRHMMAFIEQEANEK     | 30  | 12556 | 1.00 | 0.11 | 11  |
| 1 C17H12.14  | GLVMQGLLQLEK         | 73  | 1339  | 1.00 | 0.20 | 20  |
| 22 C17H12.14 | QLRHMMAFIEQEANEK     | 51  | 11412 | 1.01 | 0.10 | 10  |
| 22 C17H12.14 | QLRHMMAFIEQEANEK     | 34  | 10343 | 1.02 | 0.14 | 13  |
| 22 C17H12.14 | IMEFFEK              | 42  | 2327  | 1.02 | 0.14 | 14  |
| 22 C17H12.14 | IMEFFEK              | 38  | 3448  | 1.03 | 0.14 | 14  |
| 10 C17H12.14 | GLVMQGLLQLEK         | 53  | 1044  | 1.03 | 0.13 | 12  |
| 1 C17H12.14  | QLRHMMAFIEQEANEK     | 47  | 11346 | 1.05 | 0.07 | 7   |
| 10 C17H12.14 | QNFLPSESAGGVELSARAGK | 55  | 4184  | 1.05 | 0.14 | 13  |
| 1 C17H12.14  | QLRHMMAFIEQEANEK     | 53  | 5882  | 1.07 | 0.12 | 11  |
| 1 C17H12.14  | QNFLPSESAGGVELSARAGK | 27  | 1563  | 1.07 | 0.15 | 14  |
| 7 C17H12.14  | IMEFFEK              | 31  | 1282  | 1.08 | 0.16 | 15  |
| 22 C17H12.14 | IMEFFEK              | 38  | 2103  | 1.11 | 0.11 | 9   |
| 22 C17H12.14 | QLRHMMAFIEQEANEK     | 49  | 8412  | 1.13 | 0.14 | 12  |
| 22 C17H12.14 | GLVMQGLLQLEK         | 43  | 950   | 1.15 | 0.18 | 16  |
| 10 C17H12.14 | GLVMQGLLQLEK         | 46  | 1243  | 1.15 | 0.12 | 11  |
| 22 C17H12.14 | IMEFFEK              | 19  | 3244  | 1.17 | 0.17 | 15  |
| 1 C17H12.14  | QLRHMMAFIEQEANEK     | 40  | 7212  | 1.18 | 0.11 | 9   |
| 10 C17H12.14 | QLRHMMAFIEQEANEK     | 20  | 6069  | 1.21 | 0.15 | 12  |
| 7 C17H12.14  | QLRHMMAFIEQEANEK     | 30  | 9477  | 1.21 | 0.13 | 11  |
| 1 C17H12.14  | QLRHMMAFIEQEANEK     | 43  | 2386  | 1.23 | 0.20 | 17  |
| 7 C17H12.14  | QLRHMMAFIEQEANEK     | 13  | 5168  | 1.24 | 0.13 | 11  |
| 10 C17H12.14 | QLRHMMAFIEQEANEK     | 75  | 18576 | 1.25 | 0.21 | 17  |
| 22 C17H12.14 | QLRHMMAFIEQEANEK     | 56  | 7441  | 1.30 | 0.17 | 13  |
| 10 C17H12.14 | QLRHMMAFIEQEANEK     | 67  | 37700 | 1.31 | 0.10 | 8   |
| 7 C17H12.14  | IMEFFEK              | 49  | 3149  | 1.36 | 0.12 | 9   |
| 10 C17H12.14 | QLRHMMAFIEQEANEK     | 71  | 35216 | 1.37 | 0.07 | 5   |
| 22 C17H12.14 | QLRHMMAFIEQEANEK     | 60  | 9757  | 1.39 | 0.13 | 9   |
| 22 C17H12.14 | GLVMQGLLQLEK         | 103 | 9972  | 1.39 | 0.05 | 4   |
| 1 C17H12.14  | IMEFFEK              | 22  | 551   | 1.41 | 0.17 | 12  |
| 7 C17H12.14  | GLVMQGLLQLEK         | 74  | 894   | 1.43 | 0.16 | 11  |
| 7 C17H12.14  | QLRHMMAFIEQEANEK     | 22  | 9467  | 1.43 | 0.16 | 11  |
| 10 C17H12.14 | QLRHMMAFIEQEANEK     | 47  | 12755 | 1.43 | 0.16 | 11  |
| 22 C17H12.14 | QNFLPSESAGGVELSARAGK | 49  | 3139  | 1.44 | 0.17 | 12  |
| 22 C17H12.14 | GLVMQGLLQLEK         | 109 | 9536  | 1.45 | 0.06 | 4   |
| 10 C17H12.14 | QVELQRK              | 37  | 5935  | 1.45 | 0.05 | 3   |
| 7 C17H12.14  | IMEFFEK              | 39  | 3318  | 1.48 | 0.06 | 4   |
| 10 C17H12.14 | QLRHMMAFIEQEANEK     | 26  | 9142  | 1.51 | 0.17 | 11  |
| 10 C17H12.14 | QLRHMMAFIEQEANEK     | 24  | 10862 | 1.52 | 0.16 | 11  |

|              |                      |     |       |      |      |     |
|--------------|----------------------|-----|-------|------|------|-----|
| 22 C17H12.14 | QLRHMMAFIEQEANEK     | 70  | 15669 | 1.59 | 0.14 | 9   |
| 10 C17H12.14 | GLVMQGLLQLEK         | 29  | 527   | 1.60 | 0.21 | 13  |
| 22 C17H12.14 | QNFLPSESAGGVELSARAGK | 99  | 3858  | 1.60 | 0.09 | 6   |
| 10 C17H12.14 | IMEFFEK              | 10  | 1680  | 1.64 | 0.23 | 14  |
| 10 C17H12.14 | QVELQRK              | 36  | 4146  | 1.67 | 0.06 | 3   |
| 1 C17H12.14  | IMEFFEK              | 12  | 328   | 1.69 | 0.21 | 13  |
| 1 C17H12.14  | QLRHMMAFIEQEANEK     | 23  | 1288  | 1.80 | 0.26 | 14  |
| 22 C17H12.14 | QLRHMMAFIEQEANEK     | 46  | 9442  | 1.81 | 0.17 | 10  |
| 1 C17H12.14  | QLRHMMAFIEQEANEK     | 15  | 3202  | 1.82 | 0.25 | 14  |
| 10 C17H12.14 | QLRHMMAFIEQEANEK     | 24  | 12314 | 1.89 | 0.15 | 8   |
| 10 C17H12.14 | IMEFFEK              | 18  | 2303  | 1.91 | 0.22 | 12  |
| 10 C17H12.14 | QLRHMMAFIEQEANEK     | 31  | 16912 | 1.94 | 0.11 | 6   |
| 1 C17H12.14  | QLRHMMAFIEQEANEK     | 47  | 3170  | 2.04 | 0.20 | 10  |
| 10 C17H12.14 | QLRHMMAFIEQEANEK     | 20  | 11982 | 2.07 | 0.15 | 7   |
| 22 C17H12.14 | IMEFFEK              | 17  | 2060  | 2.13 | 0.07 | 3   |
| 1 C17H12.14  | QNFLPSESAGGVELSARAGK | 26  | 928   | 2.16 | 0.12 | 6   |
| 7 C17H12.14  | GLVMQGLLQLEK         | 56  | 787   | 2.17 | 0.24 | 11  |
| 22 C17H12.14 | IMEFFEK              | 28  | 2308  | 2.19 | 0.10 | 5   |
| 10 C17H12.14 | QLRHMMAFIEQEANEK     | 36  | 13898 | 2.25 | 0.17 | 8   |
| 22 C17H12.14 | GLVMQGLLQLEK         | 65  | 1577  | 2.33 | 0.18 | 8   |
| 22 C17H12.14 | QLRHMMAFIEQEANEK     | 20  | 7331  | 2.37 | 0.11 | 5   |
| 22 C17H12.14 | IMEFFEK              | 18  | 2537  | 2.63 | 0.15 | 6   |
| 1 C17H12.14  | QLRHMMAFIEQEANEK     | 54  | 5563  | 2.68 | 0.17 | 6   |
| 22 C17H12.14 | QLRHMMAFIEQEANEK     | 21  | 5630  | 2.69 | 0.10 | 4   |
| 1 C17H12.14  | IMEFFEK              | 37  | 1683  | 2.98 | 0.11 | 4   |
| 1 C17H12.14  | QLRHMMAFIEQEANEK     | 49  | 12095 | 3.01 | 0.11 | 4   |
| 7 C17H12.14  | IMEFFEK              | 20  | 2051  | 3.03 | 0.13 | 4   |
| 22 C17H12.14 | QLRHMMAFIEQEANEK     | 44  | 10845 | 3.07 | 0.13 | 4   |
| 22 C17H12.14 | IMEFFEK              | 15  | 2064  | 3.14 | 0.21 | 7   |
| 7 C17H12.14  | GLVMQGLLQLEK         | 71  | 1406  | 3.20 | 0.13 | 4   |
| 1 C17H12.14  | QLRHMMAFIEQEANEK     | 45  | 4891  | 3.31 | 0.18 | 6   |
| 10 C17H12.14 | IMEFFEK              | 30  | 2698  | 3.38 | 0.13 | 4   |
| 10 C17H12.14 | IMEFFEK              | 22  | 1844  | 3.50 | 0.16 | 4   |
| 22 C17H12.14 | IMEFFEK              | 43  | 3146  | 3.57 | 0.13 | 4   |
| 7 C17H12.14  | QLRHMMAFIEQEANEK     | 38  | 3911  | 3.69 | 0.14 | 4   |
| 1 C17H12.14  | QLRHMMAFIEQEANEK     | 44  | 6548  | 3.69 | 0.13 | 4   |
| 1 C17H12.14  | QLRHMMAFIEQEANEK     | 34  | 6818  | 3.71 | 0.14 | 4   |
| 1 C17H12.14  | QLRHMMAFIEQEANEK     | 44  | 12108 | 3.78 | 0.09 | 3   |
| 22 C17H12.14 | QLRHMMAFIEQEANEK     | 45  | 6309  | 4.34 | 0.18 | 4   |
| 7 C17H12.14  | IMEFFEK              | 32  | 1871  | 4.83 | 0.20 | 4   |
| 1 C17H12.14  | QLRHMMAFIEQEANEK     | 26  | 5447  | 5.32 | 0.17 | 3   |
| 7 C17H12.14  | IMEFFEK              | 23  | 1868  | 5.68 | 0.14 | 3   |
| 7 C17H12.14  | IMEFFEK              | 24  | 1772  | 6.79 | 0.19 | 3   |
| 1 C17H12.14  | QVELQRK              | 43  | 3241  | 7.08 | 0.09 | 1   |
| 7 C17H12.14  | IMEFFEK              | 29  | 1333  | 7.25 | 0.27 | 4   |
| 7 C18A11.7a  | ELADADAGAYRCAIVNPHGK | 34  | 3014  | 0.27 | 0.41 | 151 |
| 1 C18A11.7a  | GNANFNLK             | 28  | 1182  | 0.30 | 0.62 | 203 |
| 7 C18A11.7a  | GSDSYSAILTIK         | 36  | 1331  | 0.32 | 0.17 | 54  |
| 7 C18A11.7a  | SILEPTFVWQK          | 17  | 1605  | 0.36 | 0.29 | 80  |
| 22 C18A11.7a | SILEPTFVWQK          | 23  | 1508  | 0.38 | 0.22 | 57  |
| 7 C18A11.7a  | LVGGGAEEIANSRIK      | 53  | 1654  | 0.38 | 0.41 | 107 |
| 7 C18A11.7a  | GSDSYSAILTIK         | 38  | 1804  | 0.39 | 0.19 | 48  |
| 7 C18A11.7a  | GSDSYSAILTIK         | 48  | 1203  | 0.40 | 0.18 | 46  |
| 22 C18A11.7a | SILEPTFVWQK          | 15  | 1610  | 0.41 | 0.21 | 52  |
| 22 C18A11.7a | LVGGGAEEIANSRIK      | 53  | 1834  | 0.42 | 0.20 | 49  |
| 7 C18A11.7a  | LVGGGAEEIANSRIK      | 51  | 1396  | 0.43 | 0.15 | 35  |
| 22 C18A11.7a | SILEPTFVWQK          | 35  | 1952  | 0.45 | 0.15 | 33  |
| 10 C18A11.7a | LVGGGAEEIANSRIK      | 49  | 2193  | 0.46 | 0.12 | 27  |
| 7 C18A11.7a  | LVGGGAEEIANSRIK      | 39  | 1508  | 0.50 | 0.21 | 42  |
| 22 C18A11.7a | ELADADAGAYRCAIVNPHGK | 28  | 2116  | 0.57 | 0.10 | 17  |
| 22 C18A11.7a | SILEPTFVWQK          | 11  | 678   | 0.58 | 0.19 | 33  |
| 22 C18A11.7a | SILEPTFVWQK          | 22  | 1621  | 0.58 | 0.06 | 10  |
| 22 C18A11.7a | SILEPTFVWQK          | 23  | 1648  | 0.59 | 0.11 | 19  |
| 22 C18A11.7a | SILEPTFVWQK          | 18  | 1912  | 0.62 | 0.09 | 15  |
| 10 C18A11.7a | DSGTYTCHNIK          | 58  | 3684  | 0.62 | 0.07 | 11  |
| 7 C18A11.7a  | SILEPTFVWQK          | 13  | 779   | 0.63 | 0.10 | 16  |
| 22 C18A11.7a | SILEPTFVWQK          | 14  | 933   | 0.66 | 0.13 | 19  |
| 22 C18A11.7a | LVGGGAEEIANSRIK      | 75  | 2064  | 0.68 | 0.22 | 32  |
| 10 C18A11.7a | SILEPTFVWQK          | 13  | 1878  | 0.69 | 0.10 | 15  |
| 22 C18A11.7a | LVGGGAEEIANSRIK      | 36  | 1021  | 0.69 | 0.22 | 31  |
| 10 C18A11.7a | SILEPTFVWQK          | 36  | 2136  | 0.70 | 0.10 | 14  |
| 10 C18A11.7a | DSGTYTCHNIK          | 52  | 3215  | 0.72 | 0.07 | 10  |
| 7 C18A11.7a  | EVENSGRFSANLANK      | 20  | 5676  | 0.73 | 0.15 | 21  |
| 10 C18A11.7a | EVENSGRFSANLANK      | 14  | 9299  | 0.74 | 0.13 | 17  |
| 7 C18A11.7a  | LVGGGAEEIANSRIK      | 77  | 5628  | 0.76 | 0.10 | 13  |
| 22 C18A11.7a | SILEPTFVWQK          | 12  | 1046  | 0.77 | 0.10 | 13  |
| 22 C18A11.7a | GSDSYSAILTIK         | 40  | 1782  | 0.77 | 0.18 | 24  |
| 10 C18A11.7a | LVGGGAEEIANSRIK      | 114 | 7175  | 0.77 | 0.12 | 16  |
| 10 C18A11.7a | SILEPTFVWQK          | 25  | 2864  | 0.78 | 0.12 | 15  |
| 7 C18A11.7a  | DSGTYTCHNIK          | 19  | 1764  | 0.79 | 0.16 | 20  |
| 10 C18A11.7a | SILEPTFVWQK          | 23  | 2515  | 0.82 | 0.12 | 15  |
| 7 C18A11.7a  | EVENSGRFSANLANK      | 37  | 6964  | 0.84 | 0.24 | 28  |
| 7 C18A11.7a  | LVGGGAEEIANSRIK      | 80  | 3911  | 0.85 | 0.16 | 18  |
| 10 C18A11.7a | LVGGGAEEIANSRIK      | 55  | 4039  | 0.89 | 0.16 | 18  |
| 10 C18A11.7a | LVGGGAEEIANSRIK      | 85  | 4851  | 0.89 | 0.13 | 15  |
| 10 C18A11.7a | SILEPTFVWQK          | 16  | 1590  | 0.89 | 0.26 | 29  |
| 10 C18A11.7a | SILEPTFVWQK          | 14  | 1895  | 0.90 | 0.12 | 13  |
| 1 C18A11.7a  | SILEPTFVWQK          | 11  | 1120  | 0.92 | 0.13 | 14  |
| 7 C18A11.7a  | EVENSGRFSANLANK      | 30  | 3663  | 0.93 | 0.31 | 34  |
| 10 C18A11.7a | SILEPTFVWQK          | 30  | 1735  | 0.94 | 0.13 | 14  |
| 10 C18A11.7a | LVGGGAEEIANSRIK      | 89  | 5329  | 0.95 | 0.15 | 16  |
| 7 C18A11.7a  | EVENSGRFSANLANK      | 29  | 3279  | 0.98 | 0.32 | 33  |
| 22 C18A11.7a | DSGTYTCHNIK          | 66  | 4608  | 1.00 | 0.10 | 10  |
| 1 C18A11.7a  | GSDSYSAILTIK         | 38  | 2164  | 1.01 | 0.12 | 12  |
| 10 C18A11.7a | EVENSGRFSANLANK      | 44  | 7419  | 1.02 | 0.27 | 27  |
| 10 C18A11.7a | SILEPTFVWQK          | 13  | 1085  | 1.04 | 0.08 | 8   |
| 22 C18A11.7a | ELADADAGAYRCAIVNPHGK | 17  | 9283  | 1.04 | 0.12 | 11  |
| 1 C18A11.7a  | GSDSYSAILTIK         | 64  | 2452  | 1.04 | 0.15 | 15  |
| 22 C18A11.7a | GSDSYSAILTIK         | 41  | 1745  | 1.05 | 0.12 | 11  |
| 10 C18A11.7a | EVENSGRFSANLANK      | 45  | 13822 | 1.09 | 0.12 | 11  |
| 22 C18A11.7a | EVENSGRFSANLANK      | 34  | 4421  | 1.10 | 0.25 | 23  |

|                      |                   |    |       |      |      |     |
|----------------------|-------------------|----|-------|------|------|-----|
| 10 C18A11.7a         | SILEPTFVWQK       | 20 | 1231  | 1.10 | 0.08 | 7   |
| 1 C18A11.7a          | SILEPTFVWQK       | 20 | 1594  | 1.13 | 0.11 | 10  |
| 7 C18A11.7a          | LVGGGAEEIIANSDRIK | 53 | 1278  | 1.14 | 0.14 | 12  |
| 1 C18A11.7a          | GSDSYSAILTIK      | 53 | 1999  | 1.15 | 0.11 | 9   |
| 10 C18A11.7a         | EVENSGRFSANLANK   | 54 | 8094  | 1.15 | 0.22 | 19  |
| 10 C18A11.7a         | SILEPTFVWQK       | 14 | 1982  | 1.17 | 0.14 | 12  |
| 22 C18A11.7a         | LVGGGAEEIIANSDRIK | 68 | 3498  | 1.19 | 0.12 | 10  |
| 7 C18A11.7a          | SILEPTFVWQK       | 22 | 3670  | 1.19 | 0.11 | 9   |
| 22 C18A11.7a         | EVENSGRFSANLANK   | 37 | 6512  | 1.19 | 0.24 | 21  |
| 7 C18A11.7a          | GSDSYSAILTIK      | 42 | 1669  | 1.20 | 0.07 | 6   |
| 1 C18A11.7a          | SILEPTFVWQK       | 30 | 1807  | 1.21 | 0.18 | 15  |
| 22 C18A11.7a         | LVGGGAEEIIANSDRIK | 91 | 7039  | 1.23 | 0.11 | 9   |
| 1 C18A11.7a          | SILEPTFVWQK       | 13 | 677   | 1.23 | 0.16 | 13  |
| 7 C18A11.7a          | LVGGGAEEIIANSDRIK | 39 | 1077  | 1.25 | 0.20 | 16  |
| 22 C18A11.7a         | EVENSGRFSANLANK   | 54 | 6365  | 1.27 | 0.22 | 17  |
| 22 C18A11.7a         | GNANFNLK          | 41 | 968   | 1.30 | 0.15 | 11  |
| 22 C18A11.7a         | EVENSGRFSANLANK   | 34 | 3819  | 1.31 | 0.17 | 13  |
| 22 C18A11.7a         | SILEPTFVWQK       | 12 | 1924  | 1.32 | 0.14 | 11  |
| 7 C18A11.7a          | SILEPTFVWQK       | 12 | 1541  | 1.33 | 0.14 | 10  |
| 22 C18A11.7a         | EVENSGRFSANLANK   | 19 | 5042  | 1.39 | 0.17 | 12  |
| 22 C18A11.7a         | DSGTYTCNIK        | 41 | 3900  | 1.39 | 0.17 | 12  |
| 1 C18A11.7a          | GSDSYSAILTIK      | 22 | 1223  | 1.48 | 0.02 | 1   |
| 7 C18A11.7a          | SILEPTFVWQK       | 22 | 2339  | 1.57 | 0.12 | 8   |
| 10 C18A11.7a         | SILEPTFVWQK       | 19 | 2677  | 1.60 | 0.11 | 7   |
| 22 C18A11.7a         | EVENSGRFSANLANK   | 47 | 11094 | 1.60 | 0.20 | 13  |
| 7 C18A11.7a          | SILEPTFVWQK       | 20 | 3722  | 1.63 | 0.07 | 4   |
| 7 C18A11.7a          | SILEPTFVWQK       | 17 | 904   | 1.79 | 0.08 | 5   |
| 7 C18A11.7a          | GNANFNLK          | 21 | 661   | 3.98 | 0.12 | 3   |
| 22 C18A11.7a         | GNANFNLK          | 21 | 6005  | 4.65 | 0.12 | 2   |
| 10 C18A3.6a;C18A3.6b | LLIIGNSSVGK       | 11 | 5760  | 8.14 | 0.44 | 5   |
| 22 C23G10.3          | AELNNFLMK         | 43 | 1573  | 0.22 | 0.25 | 112 |
| 1 C23G10.3           | AELNNFLMK         | 27 | 1300  | 0.28 | 0.18 | 65  |
| 22 C23G10.3          | AELNNFLMK         | 37 | 1885  | 0.34 | 0.18 | 54  |
| 1 C23G10.3           | AELNNFLMK         | 28 | 1071  | 0.43 | 0.18 | 41  |
| 10 C23G10.3          | ELTSVVQK          | 50 | 33735 | 0.44 | 0.10 | 23  |
| 1 C23G10.3           | AELNNFLMK         | 30 | 873   | 0.45 | 0.09 | 20  |
| 1 C23G10.3           | AVIGGIFK          | 23 | 1473  | 0.47 | 0.12 | 25  |
| 1 C23G10.3           | AVIGGIFK          | 54 | 4301  | 0.48 | 0.07 | 16  |
| 1 C23G10.3           | AELNNFLMK         | 36 | 2760  | 0.48 | 0.17 | 35  |
| 1 C23G10.3           | RFGFEEGSVELYAEK   | 14 | 637   | 0.48 | 0.13 | 26  |
| 22 C23G10.3          | AELNNFLMK         | 42 | 2549  | 0.49 | 0.27 | 56  |
| 22 C23G10.3          | AELNNFLMK         | 32 | 4112  | 0.52 | 0.24 | 47  |
| 1 C23G10.3           | AVIGGIFK          | 48 | 4731  | 0.52 | 0.05 | 9   |
| 10 C23G10.3          | AELNNFLMK         | 33 | 1379  | 0.52 | 0.14 | 28  |
| 10 C23G10.3          | ELTSVVQK          | 11 | 1610  | 0.52 | 0.26 | 50  |
| 1 C23G10.3           | AELNNFLMK         | 22 | 769   | 0.53 | 0.22 | 41  |
| 22 C23G10.3          | AVIGGIFK          | 43 | 7313  | 0.56 | 0.10 | 18  |
| 1 C23G10.3           | AELNNFLMK         | 46 | 1456  | 0.58 | 0.16 | 27  |
| 10 C23G10.3          | AVIGGIFK          | 54 | 15461 | 0.58 | 0.08 | 14  |
| 22 C23G10.3          | AELNNFLMK         | 33 | 4505  | 0.59 | 0.14 | 24  |
| 7 C23G10.3           | RFGFEEGSVELYAEK   | 64 | 1950  | 0.60 | 0.14 | 24  |
| 10 C23G10.3          | AELNNFLMK         | 25 | 804   | 0.60 | 0.07 | 11  |
| 10 C23G10.3          | AVIGGIFK          | 63 | 39606 | 0.61 | 0.09 | 14  |
| 10 C23G10.3          | AELNNFLMK         | 25 | 3742  | 0.62 | 0.13 | 20  |
| 1 C23G10.3           | AELNNFLMK         | 18 | 732   | 0.63 | 0.10 | 15  |
| 7 C23G10.3           | AVIGGIFK          | 26 | 1585  | 0.63 | 0.34 | 53  |
| 7 C23G10.3           | AELNNFLMK         | 21 | 1062  | 0.66 | 0.06 | 10  |
| 22 C23G10.3          | AELNNFLMK         | 25 | 2257  | 0.66 | 0.22 | 33  |
| 7 C23G10.3           | AELNNFLMK         | 16 | 995   | 0.67 | 0.23 | 34  |
| 1 C23G10.3           | AELNNFLMK         | 29 | 2599  | 0.69 | 0.15 | 22  |
| 7 C23G10.3           | AVIGGIFK          | 15 | 1370  | 0.71 | 0.42 | 59  |
| 10 C23G10.3          | AELNNFLMK         | 24 | 3813  | 0.72 | 0.14 | 19  |
| 22 C23G10.3          | AVIGGIFK          | 48 | 8561  | 0.74 | 0.02 | 3   |
| 7 C23G10.3           | RFGFEEGSVELYAEK   | 66 | 2592  | 0.74 | 0.20 | 27  |
| 1 C23G10.3           | RFGFEEGSVELYAEK   | 31 | 693   | 0.74 | 0.09 | 12  |
| 1 C23G10.3           | AELNNFLMK         | 25 | 2530  | 0.75 | 0.14 | 19  |
| 1 C23G10.3           | RFGFEEGSVELYAEK   | 80 | 1728  | 0.79 | 0.15 | 19  |
| 22 C23G10.3          | RFGFEEGSVELYAEK   | 39 | 1116  | 0.80 | 0.16 | 20  |
| 10 C23G10.3          | AELNNFLMK         | 40 | 4785  | 0.81 | 0.04 | 5   |
| 7 C23G10.3           | RFGFEEGSVELYAEK   | 31 | 3750  | 0.81 | 0.14 | 18  |
| 10 C23G10.3          | RFGFEEGSVELYAEK   | 53 | 3193  | 0.82 | 0.05 | 7   |
| 7 C23G10.3           | AELNNFLMK         | 46 | 3661  | 0.84 | 0.11 | 13  |
| 22 C23G10.3          | AELNNFLMK         | 32 | 4319  | 0.85 | 0.15 | 18  |
| 1 C23G10.3           | AELNNFLMK         | 20 | 3339  | 0.86 | 0.09 | 10  |
| 10 C23G10.3          | AVIGGIFK          | 11 | 876   | 0.86 | 0.03 | 4   |
| 1 C23G10.3           | RFGFEEGSVELYAEK   | 59 | 6337  | 0.88 | 0.15 | 18  |
| 22 C23G10.3          | AVIGGIFK          | 11 | 659   | 0.88 | 0.19 | 21  |
| 1 C23G10.3           | RFGFEEGSVELYAEK   | 36 | 4666  | 0.89 | 0.22 | 25  |
| 1 C23G10.3           | RFGFEEGSVELYAEK   | 28 | 1049  | 0.89 | 0.14 | 16  |
| 10 C23G10.3          | AELNNFLMK         | 34 | 4840  | 0.90 | 0.03 | 3   |
| 10 C23G10.3          | AELNNFLMK         | 54 | 3614  | 0.91 | 0.11 | 12  |
| 7 C23G10.3           | RFGFEEGSVELYAEK   | 18 | 3786  | 0.94 | 0.14 | 15  |
| 22 C23G10.3          | AELNNFLMK         | 22 | 1158  | 0.94 | 0.12 | 13  |
| 7 C23G10.3           | RFGFEEGSVELYAEK   | 54 | 1692  | 0.94 | 0.13 | 14  |
| 10 C23G10.3          | AELNNFLMK         | 35 | 3610  | 0.95 | 0.04 | 4   |
| 10 C23G10.3          | RFGFEEGSVELYAEK   | 62 | 4050  | 0.97 | 0.12 | 13  |
| 7 C23G10.3           | AELNNFLMK         | 22 | 1259  | 0.99 | 0.16 | 16  |
| 7 C23G10.3           | AELNNFLMK         | 31 | 1066  | 0.99 | 0.19 | 19  |
| 10 C23G10.3          | AELNNFLMK         | 19 | 2818  | 1.01 | 0.20 | 20  |
| 10 C23G10.3          | AELNNFLMK         | 31 | 8854  | 1.02 | 0.14 | 13  |
| 22 C23G10.3          | ELTSVVQK          | 65 | 11267 | 1.04 | 0.07 | 7   |
| 1 C23G10.3           | AELNNFLMK         | 32 | 709   | 1.05 | 0.04 | 4   |
| 1 C23G10.3           | AELNNFLMK         | 52 | 1291  | 1.08 | 0.10 | 9   |
| 7 C23G10.3           | ELTSVVQK          | 51 | 3614  | 1.10 | 0.14 | 13  |
| 10 C23G10.3          | AELNNFLMK         | 30 | 5955  | 1.23 | 0.06 | 5   |
| 22 C23G10.3          | AVIGGIFK          | 18 | 1448  | 1.24 | 0.10 | 8   |
| 22 C23G10.3          | AELNNFLMK         | 25 | 1512  | 1.25 | 0.28 | 22  |
| 22 C23G10.3          | RFGFEEGSVELYAEK   | 32 | 2548  | 1.26 | 0.23 | 18  |
| 10 C23G10.3          | AVIGGIFK          | 22 | 3343  | 1.27 | 0.20 | 16  |
| 7 C23G10.3           | RFGFEEGSVELYAEK   | 29 | 1326  | 1.43 | 0.13 | 9   |
| 1 C23G10.3           | AVIGGIFK          | 24 | 2118  | 1.43 | 0.12 | 8   |

|                               |                                   |    |       |      |      |    |
|-------------------------------|-----------------------------------|----|-------|------|------|----|
| 10 C23G10.3                   | IMLPYDPRGQNGPRNALPDHVQIVEPQEEVLPK | 13 | 5601  | 1.46 | 0.09 | 6  |
| 22 C23G10.3                   | AELNNFLMK                         | 17 | 1487  | 1.47 | 0.12 | 8  |
| 7 C23G10.3                    | AVIGGIFK                          | 25 | 2717  | 1.49 | 0.08 | 6  |
| 22 C23G10.3                   | AVIGGIFK                          | 30 | 1169  | 1.59 | 0.15 | 9  |
| 10 C23G10.3                   | IMLPYDPRGQNGPRNALPDHVQIVEPQEEVLPK | 15 | 7514  | 1.61 | 0.23 | 14 |
| 10 C23G10.3                   | AVIGGIFK                          | 21 | 1843  | 1.64 | 0.20 | 12 |
| 22 C23G10.3                   | AELNNFLMK                         | 22 | 2730  | 1.65 | 0.09 | 5  |
| 22 C23G10.3                   | AVIGGIFK                          | 26 | 1621  | 1.66 | 0.05 | 3  |
| 22 C23G10.3                   | RFGFEEGSVELYAEK                   | 26 | 2145  | 2.03 | 0.21 | 10 |
| 22 C23G10.3                   | IMLPYDPRGQNGPRNALPDHVQIVEPQEEVLPK | 20 | 1447  | 2.31 | 0.37 | 16 |
| 22 C23G10.3                   | AVIGGIFK                          | 21 | 1026  | 2.83 | 0.16 | 6  |
| 10 C23G10.4b;C23G10.4a        | IETAIDTYK                         | 22 | 941   | 0.31 | 0.16 | 53 |
| 22 C23G10.4b;C23G10.4a        | EGGAMLAYGLIHAK                    | 78 | 4437  | 0.33 | 0.19 | 57 |
| 7 C23G10.4b;C23G10.4a         | EGGAMLAYGLIHAK                    | 48 | 2490  | 0.60 | 0.13 | 21 |
| 22 C23G10.4b;C23G10.4a        | IETAIDTYK                         | 54 | 2955  | 0.65 | 0.17 | 26 |
| 22 C23G10.4b;C23G10.4a        | IETAIDTYK                         | 14 | 992   | 0.70 | 0.11 | 16 |
| 22 C23G10.4b;C23G10.4a        | IETAIDTYK                         | 41 | 3429  | 0.80 | 0.15 | 19 |
| 7 C23G10.4b;C23G10.4a         | IETAIDTYK                         | 11 | 1150  | 0.84 | 0.14 | 16 |
| 7 C23G10.4b;C23G10.4a         | IETAIDTYK                         | 20 | 1682  | 0.92 | 0.13 | 14 |
| 10 C23G10.4b;C23G10.4a        | EGGAMLAYGLIHAK                    | 66 | 2061  | 0.92 | 0.11 | 12 |
| 22 C23G10.4b;C23G10.4a        | VLEPYLPK                          | 15 | 2136  | 1.06 | 0.12 | 11 |
| 10 C23G10.4b;C23G10.4a        | IETAIDTYK                         | 30 | 1261  | 1.07 | 0.16 | 15 |
| 7 C23G10.4b;C23G10.4a         | IHSILK                            | 13 | 3442  | 1.10 | 0.16 | 14 |
| 22 C23G10.4b;C23G10.4a        | VLEPYLPK                          | 18 | 2355  | 1.14 | 0.10 | 9  |
| 7 C23G10.4b;C23G10.4a         | IETAIDTYK                         | 26 | 1502  | 1.17 | 0.28 | 24 |
| 22 C23G10.4b;C23G10.4a        | VLEPYLPK                          | 13 | 2688  | 1.24 | 0.19 | 15 |
| 10 C23G10.4b;C23G10.4a        | IETAIDTYK                         | 22 | 1436  | 1.40 | 0.12 | 8  |
| 7 C23G10.4b;C23G10.4a         | IHSILK                            | 13 | 3772  | 1.45 | 0.07 | 5  |
| 10 C23G10.4b;C23G10.4a        | IHSILK                            | 19 | 1422  | 1.48 | 0.13 | 9  |
| 1 C23G10.4b;C23G10.4a         | IHSILK                            | 13 | 2833  | 1.54 | 0.07 | 5  |
| 10 C23G10.4b;C23G10.4a        | IETAIDTYK                         | 27 | 1983  | 1.63 | 0.11 | 7  |
| 10 C23G10.4b;C23G10.4a        | IETAIDTYK                         | 56 | 1950  | 1.67 | 0.11 | 7  |
| 10 C23G10.4b;C23G10.4a        | IHSILK                            | 25 | 5016  | 1.87 | 0.10 | 6  |
| 7 C23G10.4b;C23G10.4a         | IHSILK                            | 12 | 3116  | 1.96 | 0.03 | 2  |
| 7 C23G10.4b;C23G10.4a         | GGIIVADRVDK                       | 27 | 2704  | 1.96 | 0.12 | 6  |
| 7 C23G10.4b;C23G10.4a         | GGIIVADRVDK                       | 36 | 2548  | 2.10 | 0.19 | 9  |
| 22 C23G10.4b;C23G10.4a        | IHSILK                            | 13 | 2049  | 2.12 | 0.07 | 3  |
| 22 C23G10.4b;C23G10.4a        | IHSILK                            | 15 | 4265  | 2.35 | 0.06 | 3  |
| 22 C23G10.4b;C23G10.4a        | IHSILK                            | 14 | 4895  | 2.70 | 0.10 | 4  |
| 10 C23G10.4b;C23G10.4a        | IHSILK                            | 17 | 4846  | 2.75 | 0.12 | 4  |
| 10 C23G10.4b;C23G10.4a        | IHSILK                            | 17 | 5680  | 4.32 | 0.19 | 4  |
| 10 C23G10.4b;C23G10.4a        | IHSILK                            | 12 | 4928  | 4.62 | 0.12 | 3  |
| 22 C24A3.4                    | VLEETFLQK                         | 16 | 698   | 0.91 | 0.14 | 16 |
| 10 C24A3.4                    | VLEETFLQK                         | 18 | 528   | 1.17 | 0.17 | 15 |
| 10 C24A3.4                    | VLEETFLQK                         | 12 | 543   | 2.03 | 0.10 | 5  |
| 22 C25B8.3a;C25B8.3b;C25B8.3c | FFGASAYGVK                        | 25 | 2873  | 0.25 | 0.11 | 43 |
| 22 C25B8.3a;C25B8.3b;C25B8.3c | FFGASAYGVK                        | 26 | 3344  | 0.27 | 0.13 | 47 |
| 10 C25B8.3a;C25B8.3b;C25B8.3c | FFGASAYGVK                        | 56 | 10984 | 0.45 | 0.12 | 26 |
| 10 C25B8.3a;C25B8.3b;C25B8.3c | FFGASAYGVK                        | 75 | 11432 | 0.47 | 0.09 | 19 |
| 10 C25B8.3a;C25B8.3b;C25B8.3c | FFGASAYGVK                        | 23 | 1426  | 0.65 | 0.16 | 25 |
| 22 C25B8.3a;C25B8.3b;C25B8.3c | FFGASAYGVK                        | 78 | 8059  | 0.65 | 0.09 | 14 |
| 22 C25B8.3a;C25B8.3b;C25B8.3c | FFGASAYGVK                        | 31 | 3138  | 0.78 | 0.10 | 12 |
| 22 C25B8.3a;C25B8.3b;C25B8.3c | FFGASAYGVK                        | 84 | 6767  | 0.80 | 0.08 | 10 |
| 10 C25B8.3a;C25B8.3b;C25B8.3c | THFDPCPHDLYPTPK                   | 13 | 22667 | 1.01 | 0.16 | 16 |
| 10 C25B8.3a;C25B8.3b;C25B8.3c | THFDPCPHDLYPTPK                   | 16 | 24280 | 1.12 | 0.09 | 8  |
| 22 C25B8.3a;C25B8.3b;C25B8.3c | THFDPCPHDLYPTPK                   | 31 | 20190 | 1.79 | 0.23 | 13 |
| 22 C25B8.3a;C25B8.3b;C25B8.3c | FFGASAYGVK                        | 73 | 7069  | 1.98 | 0.07 | 4  |
| 22 C25B8.3a;C25B8.3b;C25B8.3c | FFGASAYGVK                        | 78 | 5673  | 2.02 | 0.08 | 4  |
| 22 C25B8.3a;C25B8.3b;C25B8.3c | THFDPCPHDLYPTPK                   | 12 | 16894 | 2.02 | 0.10 | 5  |
| 22 C25B8.3a;C25B8.3b;C25B8.3c | FFGASAYGVK                        | 59 | 3975  | 2.02 | 0.14 | 7  |
| 22 C25B8.3a;C25B8.3b;C25B8.3c | FFGASAYGVK                        | 66 | 5590  | 2.06 | 0.09 | 4  |
| 10 C25B8.3a;C25B8.3b;C25B8.3c | FFGASAYGVK                        | 77 | 3171  | 2.13 | 0.09 | 4  |
| 22 C25B8.3a;C25B8.3b;C25B8.3c | FFGASAYGVK                        | 20 | 1920  | 2.26 | 0.11 | 5  |
| 22 C25B8.3a;C25B8.3b;C25B8.3c | FFGASAYGVK                        | 54 | 2837  | 2.68 | 0.12 | 5  |
| 22 C25B8.3a;C25B8.3b;C25B8.3c | THFDPCPHDLYPTPK                   | 11 | 6413  | 2.80 | 0.21 | 7  |
| 1 C25B8.3a;C25B8.3c           | FFGASAYGVK                        | 52 | 2731  | 0.41 | 0.12 | 29 |
| 1 C25B8.3a;C25B8.3c           | FFGASAYGVK                        | 42 | 847   | 2.14 | 0.17 | 8  |
| 7 C25B8.3b;C25B8.3a;C25B8.3c  | THFDPCPHDLYPTPK                   | 18 | 5171  | 1.52 | 0.17 | 11 |
| 10 C25F6.3                    | DSPDIESLLILNPK                    | 40 | 905   | 0.53 | 0.22 | 41 |
| 7 C25F6.3                     | ALLYLSGAESLK                      | 29 | 784   | 0.55 | 0.24 | 44 |
| 10 C25F6.3                    | ALLYLSGAESLK                      | 75 | 1813  | 0.66 | 0.13 | 20 |
| 22 C25F6.3                    | ANAVPSAVTK                        | 19 | 2279  | 0.67 | 0.14 | 21 |
| 10 C25F6.3                    | ALLYLSGAESLK                      | 76 | 1803  | 0.75 | 0.15 | 20 |
| 10 C25F6.3                    | ALLYLSGAESLK                      | 86 | 1913  | 0.75 | 0.14 | 18 |
| 22 C25F6.3                    | ALLYLSGAESLK                      | 81 | 1992  | 0.89 | 0.12 | 13 |
| 10 C25F6.3                    | ALLYLSGAESLK                      | 70 | 1247  | 0.90 | 0.14 | 15 |
| 22 C25F6.3                    | QMNVRQIVSK                        | 27 | 844   | 0.91 | 0.12 | 13 |
| 7 C25F6.3                     | RGVKPSVEPGTPK                     | 13 | 1506  | 1.07 | 0.18 | 17 |
| 22 C25F6.3                    | ALLYLSGAESLK                      | 84 | 1722  | 1.07 | 0.15 | 14 |
| 22 C25F6.3                    | GKPILLQGQK                        | 11 | 1676  | 1.16 | 0.38 | 33 |
| 22 C25F6.3                    | ALLYLSGAESLK                      | 74 | 1935  | 1.17 | 0.18 | 15 |
| 22 C25F6.3                    | ALLYLSGAESLK                      | 72 | 1477  | 1.23 | 0.08 | 7  |
| 22 C25F6.3                    | ALLYLSGAESLK                      | 75 | 2344  | 1.25 | 0.09 | 7  |
| 1 C25F6.3                     | RGVKPSVEPGTPK                     | 14 | 1641  | 1.27 | 0.21 | 16 |
| 22 C25F6.3                    | ALLYLSGAESLK                      | 78 | 1704  | 1.66 | 0.13 | 8  |
| 22 C25F6.3                    | RGVKPSVEPGTPK                     | 10 | 4468  | 2.17 | 0.27 | 12 |
| 22 C25F6.3                    | RGVKPSVEPGTPK                     | 15 | 5171  | 2.56 | 0.23 | 9  |
| 22 C25F6.3                    | GKPILLQGQK                        | 21 | 3020  | 4.83 | 0.61 | 13 |
| 22 C25F6.3                    | GKPILLQGQK                        | 18 | 2867  | 5.32 | 0.48 | 9  |
| 7 C25F9.2                     | HSLRGK                            | 10 | 715   | 3.22 | 0.67 | 21 |
| 22 C25F9.5;C25F9.10b          | YYFTLMTSAIK                       | 16 | 7986  | 0.86 | 0.46 | 53 |
| 10 C26D10.2a                  | VAVFFGGMAIK                       | 30 | 1041  | 0.37 | 0.11 | 28 |
| 10 C26D10.2a                  | LTLHGLQQHYVK                      | 20 | 7472  | 0.45 | 0.17 | 37 |
| 10 C26D10.2a                  | LTLHGLQQHYVK                      | 14 | 5418  | 0.49 | 0.13 | 26 |
| 10 C26D10.2a                  | VAVFFGGMAIK                       | 32 | 634   | 0.49 | 0.13 | 26 |
| 22 C26D10.2a                  | LTLHGLQQHYVK                      | 13 | 6943  | 0.65 | 0.11 | 16 |
| 22 C26D10.2a                  | LTLHGLQQHYVK                      | 29 | 32401 | 0.67 | 0.12 | 18 |
| 7 C26D10.2a                   | VAVFFGGMAIK                       | 40 | 1232  | 0.72 | 0.12 | 17 |
| 1 C26D10.2a                   | LTLHGLQQHYVK                      | 19 | 24640 | 0.72 | 0.10 | 14 |
| 22 C26D10.2a                  | QVMMFSATLPK                       | 60 | 1354  | 0.72 | 0.18 | 25 |
| 22 C26D10.2a                  | LTLHGLQQHYVK                      | 27 | 30806 | 0.73 | 0.10 | 14 |

|              |                  |    |       |      |      |    |
|--------------|------------------|----|-------|------|------|----|
| 1 C26D10.2a  | LT LHGLQQHYVK    | 23 | 18547 | 0.74 | 0.07 | 9  |
| 22 C26D10.2a | QVMMFSATLPK      | 31 | 1093  | 0.75 | 0.24 | 32 |
| 7 C26D10.2a  | QVMMFSATLPK      | 20 | 757   | 0.81 | 0.24 | 30 |
| 10 C26D10.2a | VAVFFGGMAIK      | 15 | 542   | 0.87 | 0.19 | 22 |
| 22 C26D10.2a | GLAITFVSDENDAK   | 45 | 3069  | 0.91 | 0.17 | 19 |
| 22 C26D10.2a | LT LHGLQQHYVK    | 22 | 8270  | 0.92 | 0.23 | 25 |
| 10 C26D10.2a | LT LHGLQQHYVK    | 20 | 36433 | 1.00 | 0.09 | 9  |
| 1 C26D10.2a  | QVMMFSATLPK      | 29 | 1105  | 1.01 | 0.16 | 16 |
| 22 C26D10.2a | VAVFFGGMAIK      | 41 | 821   | 1.09 | 0.07 | 6  |
| 10 C26D10.2a | QVMMFSATLPK      | 33 | 796   | 1.11 | 0.13 | 11 |
| 1 C26D10.2a  | QVMMFSATLPK      | 30 | 1277  | 1.15 | 0.12 | 10 |
| 10 C26D10.2a | LT LHGLQQHYVK    | 27 | 28448 | 1.27 | 0.19 | 15 |
| 1 C26D10.2a  | QVMMFSATLPK      | 45 | 691   | 1.28 | 0.21 | 17 |
| 10 C26D10.2a | VAVFFGGMAIK      | 34 | 756   | 1.29 | 0.11 | 8  |
| 10 C26D10.2a | GLAITFVSDENDAK   | 55 | 3312  | 1.37 | 0.18 | 13 |
| 10 C26D10.2a | VAVFFGGMAIK      | 29 | 634   | 1.38 | 0.12 | 9  |
| 1 C26D10.2a  | QVMMFSATLPK      | 25 | 1052  | 1.43 | 0.09 | 7  |
| 7 C26D10.2a  | VAVFFGGMAIK      | 22 | 750   | 1.48 | 0.21 | 14 |
| 10 C26D10.2a | QVMMFSATLPK      | 14 | 641   | 1.65 | 0.08 | 5  |
| 7 C26D10.2a  | GLAITFVSDENDAK   | 67 | 2644  | 1.67 | 0.21 | 13 |
| 1 C26D10.2a  | QVMMFSATLPK      | 46 | 771   | 1.83 | 0.09 | 5  |
| 1 C26D10.2a  | QVMMFSATLPK      | 31 | 914   | 1.84 | 0.18 | 10 |
| 1 C26D10.2a  | VAVFFGGMAIK      | 33 | 525   | 1.85 | 0.20 | 11 |
| 10 C26D10.2a | GLAITFVSDENDAK   | 42 | 2151  | 1.98 | 0.20 | 10 |
| 10 C26D10.2a | VAVFFGGMAIK      | 44 | 997   | 2.25 | 0.24 | 11 |
| 1 C26D10.2a  | VAVFFGGMAIK      | 21 | 369   | 2.54 | 0.04 | 2  |
| 7 C27D11.1   | LLESNFSPLK       | 18 | 1053  | 0.41 | 0.19 | 46 |
| 7 C27D11.1   | SLETVVVHFLK      | 56 | 2134  | 0.42 | 0.20 | 47 |
| 7 C27D11.1   | RAEELIQVGK       | 47 | 1347  | 0.43 | 0.17 | 39 |
| 22 C27D11.1  | LHDLYEEARIAK     | 16 | 3408  | 0.44 | 0.15 | 33 |
| 10 C27D11.1  | SLETVVVHFLK      | 27 | 868   | 0.47 | 0.20 | 44 |
| 7 C27D11.1   | LLESNFSPLK       | 33 | 1324  | 0.49 | 0.12 | 24 |
| 1 C27D11.1   | LHDLYEEARIAK     | 12 | 1354  | 0.51 | 0.18 | 35 |
| 1 C27D11.1   | LLESNFSPLK       | 14 | 825   | 0.51 | 0.10 | 20 |
| 22 C27D11.1  | LHDLYEEARIAK     | 10 | 4943  | 0.53 | 0.16 | 30 |
| 22 C27D11.1  | SLETVVVHFLK      | 22 | 1216  | 0.53 | 0.12 | 23 |
| 22 C27D11.1  | LHDLYEEARIAK     | 16 | 4969  | 0.56 | 0.14 | 25 |
| 22 C27D11.1  | LHDLYEEARIAK     | 20 | 4741  | 0.57 | 0.19 | 34 |
| 10 C27D11.1  | LLESNFSPLK       | 29 | 1237  | 0.61 | 0.25 | 42 |
| 22 C27D11.1  | LLESNFSPLK       | 22 | 880   | 0.63 | 0.07 | 12 |
| 22 C27D11.1  | LLESNFSPLK       | 22 | 1004  | 0.64 | 0.14 | 23 |
| 1 C27D11.1   | LLESNFSPLK       | 18 | 363   | 0.65 | 0.17 | 26 |
| 22 C27D11.1  | LLESNFSPLK       | 30 | 956   | 0.69 | 0.09 | 13 |
| 10 C27D11.1  | LLESNFSPLK       | 12 | 627   | 0.69 | 0.05 | 7  |
| 1 C27D11.1   | LLESNFSPLK       | 25 | 394   | 0.69 | 0.11 | 16 |
| 1 C27D11.1   | LHDLYEEARIAK     | 12 | 1209  | 0.69 | 0.14 | 20 |
| 7 C27D11.1   | RAEELIQVGK       | 32 | 1476  | 0.69 | 0.23 | 34 |
| 22 C27D11.1  | LHDLYEEARIAK     | 13 | 5101  | 0.71 | 0.07 | 10 |
| 10 C27D11.1  | ESDALDTLHDTIK    | 45 | 2462  | 0.72 | 0.17 | 24 |
| 10 C27D11.1  | SLETVVVHFLK      | 32 | 987   | 0.72 | 0.12 | 17 |
| 1 C27D11.1   | LLESNFSPLK       | 14 | 1062  | 0.73 | 0.19 | 27 |
| 22 C27D11.1  | LLESNFSPLK       | 13 | 712   | 0.73 | 0.21 | 29 |
| 10 C27D11.1  | LLESNFSPLK       | 14 | 879   | 0.73 | 0.13 | 18 |
| 10 C27D11.1  | LLESNFSPLK       | 42 | 1291  | 0.73 | 0.14 | 19 |
| 10 C27D11.1  | LLESNFSPLK       | 17 | 896   | 0.74 | 0.21 | 29 |
| 22 C27D11.1  | EAARIGVPEAAGQTAK | 36 | 5596  | 0.83 | 0.12 | 15 |
| 22 C27D11.1  | SLETVVVHFLK      | 33 | 1244  | 0.83 | 0.18 | 22 |
| 1 C27D11.1   | LLESNFSPLK       | 11 | 427   | 0.84 | 0.14 | 17 |
| 10 C27D11.1  | EAARIGVPEAAGQTAK | 41 | 5196  | 0.85 | 0.13 | 15 |
| 1 C27D11.1   | RAEELIQVGK       | 29 | 1483  | 0.85 | 0.17 | 19 |
| 7 C27D11.1   | LLESNFSPLK       | 40 | 1231  | 0.87 | 0.09 | 11 |
| 1 C27D11.1   | LLESNFSPLK       | 22 | 732   | 0.87 | 0.12 | 14 |
| 10 C27D11.1  | LHDLYEEARIAK     | 11 | 2999  | 0.87 | 0.17 | 20 |
| 10 C27D11.1  | ESDALDTLHDTIK    | 41 | 2245  | 0.91 | 0.10 | 11 |
| 10 C27D11.1  | LHDLYEEARIAK     | 17 | 2629  | 0.94 | 0.23 | 25 |
| 22 C27D11.1  | LLESNFSPLK       | 27 | 1159  | 0.95 | 0.20 | 21 |
| 1 C27D11.1   | LLESNFSPLK       | 27 | 684   | 0.98 | 0.23 | 24 |
| 10 C27D11.1  | MQQNAIYQEIIK     | 31 | 2040  | 0.99 | 0.15 | 15 |
| 22 C27D11.1  | LLESNFSPLK       | 36 | 1944  | 1.04 | 0.06 | 6  |
| 1 C27D11.1   | LLESNFSPLK       | 18 | 673   | 1.06 | 0.11 | 11 |
| 22 C27D11.1  | ALTQQINVK        | 32 | 1605  | 1.08 | 0.10 | 9  |
| 22 C27D11.1  | LHDLYEEARIAK     | 18 | 2939  | 1.09 | 0.17 | 15 |
| 10 C27D11.1  | LLESNFSPLK       | 25 | 1309  | 1.13 | 0.09 | 8  |
| 10 C27D11.1  | LLESNFSPLK       | 13 | 705   | 1.16 | 0.12 | 10 |
| 22 C27D11.1  | LLESNFSPLK       | 33 | 1722  | 1.16 | 0.10 | 9  |
| 22 C27D11.1  | ESDALDTLHDTIK    | 40 | 2173  | 1.20 | 0.08 | 7  |
| 22 C27D11.1  | ALTQQINVK        | 40 | 1823  | 1.20 | 0.13 | 11 |
| 7 C27D11.1   | RAEELIQVGK       | 17 | 1810  | 1.21 | 0.11 | 9  |
| 22 C27D11.1  | LLESNFSPLK       | 44 | 1792  | 1.22 | 0.14 | 12 |
| 22 C27D11.1  | EAARIGVPEAAGQTAK | 25 | 4797  | 1.22 | 0.20 | 16 |
| 10 C27D11.1  | LLESNFSPLK       | 30 | 1243  | 1.23 | 0.11 | 9  |
| 22 C27D11.1  | LLESNFSPLK       | 39 | 1351  | 1.24 | 0.24 | 20 |
| 22 C27D11.1  | ESDALDTLHDTIK    | 30 | 1909  | 1.25 | 0.07 | 5  |
| 1 C27D11.1   | RAEELIQVGK       | 26 | 565   | 1.29 | 0.08 | 6  |
| 10 C27D11.1  | EAARIGVPEAAGQTAK | 23 | 4110  | 1.35 | 0.09 | 7  |
| 1 C27D11.1   | RAEELIQVGK       | 32 | 384   | 1.38 | 0.06 | 4  |
| 22 C27D11.1  | RAEELIQVGK       | 67 | 2188  | 1.40 | 0.15 | 11 |
| 22 C27D11.1  | RAEELIQVGK       | 57 | 1612  | 1.41 | 0.11 | 8  |
| 7 C27D11.1   | EAARIGVPEAAGQTAK | 12 | 2215  | 1.44 | 0.14 | 10 |
| 22 C27D11.1  | LHDLYEEARIAK     | 17 | 1403  | 1.45 | 0.09 | 6  |
| 7 C27D11.1   | EAARIGVPEAAGQTAK | 11 | 2409  | 1.49 | 0.24 | 16 |
| 1 C27D11.1   | LLESNFSPLK       | 31 | 376   | 1.50 | 0.13 | 9  |
| 7 C27D11.1   | LLESNFSPLK       | 16 | 604   | 1.51 | 0.24 | 16 |
| 22 C27D11.1  | LHDLYEEARIAK     | 11 | 2388  | 1.51 | 0.16 | 10 |
| 10 C27D11.1  | LLESNFSPLK       | 35 | 908   | 1.53 | 0.24 | 16 |
| 10 C27D11.1  | RAEELIQVGK       | 81 | 3592  | 1.54 | 0.13 | 9  |
| 22 C27D11.1  | LHDLYEEARIAK     | 14 | 2598  | 1.55 | 0.12 | 8  |
| 10 C27D11.1  | ALTQQINVK        | 21 | 1499  | 1.57 | 0.09 | 6  |
| 7 C27D11.1   | RAEELIQVGK       | 15 | 2917  | 1.61 | 0.34 | 21 |
| 10 C27D11.1  | RAEELIQVGK       | 87 | 3670  | 1.66 | 0.22 | 13 |
| 22 C27D11.1  | LHDLYEEARIAK     | 17 | 2608  | 1.67 | 0.14 | 9  |

|                               |                   |    |       |      |      |    |
|-------------------------------|-------------------|----|-------|------|------|----|
| 22 C27D11.1                   | RAEELIQVGK        | 74 | 3582  | 1.71 | 0.20 | 12 |
| 22 C27D11.1                   | RAEELIQVGK        | 76 | 2175  | 2.03 | 0.10 | 5  |
| 10 C27D11.1                   | RAEELIQVGK        | 58 | 2936  | 2.38 | 0.08 | 3  |
| 10 C27D11.1                   | RAEELIQVGK        | 48 | 2649  | 2.50 | 0.11 | 4  |
| 1 C27D11.1                    | MQQNAIYQEIIK      | 21 | 663   | 2.53 | 0.16 | 6  |
| 7 C27D11.1                    | RAEELIQVGK        | 12 | 3743  | 2.92 | 0.50 | 17 |
| 10 C27D11.1                   | LHDLYEEARIAK      | 13 | 1789  | 3.44 | 0.23 | 7  |
| 1 C27D6.1                     | QENEILK           | 15 | 989   | 0.44 | 0.13 | 29 |
| 22 C27H6.2                    | TISHLVLSLK        | 19 | 849   | 0.46 | 0.17 | 37 |
| 10 C27H6.2                    | TISHLVLSLK        | 30 | 1825  | 0.67 | 0.19 | 28 |
| 22 C27H6.2                    | TISHLVLSLK        | 26 | 1156  | 0.79 | 0.08 | 11 |
| 10 C27H6.2                    | ILVHRTEAENVQFE EK | 10 | 4140  | 0.85 | 0.16 | 18 |
| 7 C27H6.2                     | TISHLVLSLK        | 28 | 996   | 0.90 | 0.13 | 14 |
| 22 C27H6.2                    | TISHLVLSLK        | 48 | 1547  | 0.91 | 0.11 | 12 |
| 22 C27H6.2                    | TISHLVLSLK        | 16 | 1020  | 1.04 | 0.11 | 11 |
| 10 C27H6.2                    | ILVHRTEAENVQFE EK | 29 | 4885  | 1.24 | 0.15 | 12 |
| 10 C27H6.4b;C27H6.4a;C27H6.4c | SIDVLWRLAK        | 55 | 9543  | 0.51 | 0.07 | 13 |
| 10 C27H6.4b;C27H6.4a;C27H6.4c | VTEYLGTK          | 43 | 14026 | 0.59 | 0.08 | 14 |
| 10 C27H6.4b;C27H6.4a;C27H6.4c | SIDVLWRLAK        | 57 | 7282  | 0.63 | 0.11 | 18 |
| 22 C27H6.4b;C27H6.4a;C27H6.4c | SIDVLWRLAK        | 37 | 1041  | 0.66 | 0.15 | 24 |
| 10 C27H6.4b;C27H6.4a;C27H6.4c | VTEYLGTK          | 53 | 12911 | 0.70 | 0.10 | 15 |
| 10 C27H6.4b;C27H6.4a;C27H6.4c | SIDVLWRLAK        | 42 | 2639  | 0.82 | 0.06 | 7  |
| 22 C27H6.4b;C27H6.4a;C27H6.4c | EYLDRAISIQPK      | 26 | 4648  | 0.95 | 0.11 | 11 |
| 22 C27H6.4b;C27H6.4a;C27H6.4c | SIDVLWRLAK        | 31 | 1346  | 1.11 | 0.17 | 16 |
| 10 C27H6.4b;C27H6.4a;C27H6.4c | SIDVLWRLAK        | 44 | 2655  | 1.25 | 0.16 | 13 |
| 22 C27H6.4b;C27H6.4a;C27H6.4c | SIDVLWRLAK        | 39 | 2430  | 1.25 | 0.14 | 11 |
| 22 C27H6.4b;C27H6.4a;C27H6.4c | EYLDRAISIQPK      | 16 | 5725  | 1.26 | 0.13 | 10 |
| 1 C27H6.4b;C27H6.4a;C27H6.4c  | VTEYLGTK          | 26 | 984   | 1.53 | 0.19 | 12 |
| 22 C27H6.4b;C27H6.4a;C27H6.4c | SIDVLWRLAK        | 32 | 1568  | 1.55 | 0.26 | 17 |
| 7 C27H6.8                     | EHFFDIEVEK        | 15 | 3235  | 0.96 | 0.19 | 19 |
| 7 C27H6.8                     | EHFFDIEVEK        | 22 | 3123  | 1.01 | 0.19 | 19 |
| 22 C28H8.11a                  | IVSGLDRMTK        | 21 | 1799  | 0.59 | 0.07 | 12 |
| 22 C28H8.11a                  | IVSGLDRMTK        | 15 | 1145  | 1.02 | 0.11 | 11 |
| 22 C28H8.11a                  | QLTAEYHK          | 38 | 7562  | 1.05 | 0.08 | 8  |
| 22 C28H8.11a                  | QLTAEYHK          | 40 | 9289  | 1.07 | 0.10 | 9  |
| 22 C28H8.11a                  | QIIFDLDNVRK       | 40 | 3959  | 1.15 | 0.08 | 7  |
| 22 C28H8.11a                  | QIIFDLDNVRK       | 38 | 2768  | 1.41 | 0.10 | 7  |
| 7 C28H8.11a;C28H8.11b         | QLTAEYHK          | 22 | 1419  | 0.86 | 0.16 | 18 |
| 7 C28H8.11a;C28H8.11b         | QIIFDLDNVRK       | 13 | 3265  | 1.12 | 0.24 | 21 |
| 1 C28H8.3                     | VQILENSVAGSEK     | 41 | 965   | 0.76 | 0.14 | 19 |
| 10 C28H8.3                    | QEVRRNAAIDLVGHLK  | 17 | 2947  | 0.84 | 0.13 | 16 |
| 1 C28H8.3                     | FFGQHGTK          | 11 | 1600  | 1.07 | 0.21 | 20 |
| 10 C28H8.3                    | TRESTQVLLK        | 24 | 1343  | 1.19 | 0.20 | 17 |
| 10 C28H8.3                    | FFGQHGTK          | 16 | 3267  | 1.41 | 0.15 | 11 |
| 22 C28H8.3                    | FFGQHGTK          | 12 | 3920  | 1.45 | 0.16 | 11 |
| 10 C28H8.3                    | FFGQHGTK          | 11 | 3394  | 1.46 | 0.24 | 16 |
| 1 C28H8.3                     | FFGQHGTK          | 11 | 1166  | 1.49 | 0.17 | 11 |
| 7 C28H8.3                     | LRGRNGGDPDIYAK    | 14 | 4347  | 1.78 | 0.18 | 10 |
| 22 C28H8.3                    | FFGQHGTK          | 16 | 1753  | 3.07 | 0.17 | 6  |
| 10 C29E4.7                    | GIEAEVVNLNVTDK    | 66 | 4263  | 0.79 | 0.29 | 37 |
| 22 C29E4.7                    | GIEAEVVNLNVTDK    | 76 | 3498  | 0.88 | 0.12 | 14 |
| 7 C29E4.7                     | GIEAEVVNLNVTDK    | 70 | 5915  | 0.91 | 0.22 | 24 |
| 1 C29E4.7                     | GIEAEVVNLNVTDK    | 74 | 3170  | 0.96 | 0.23 | 24 |
| 7 C29E4.7                     | GIEAEVVNLNVTDK    | 55 | 6481  | 1.09 | 0.21 | 19 |
| 7 C29E4.7                     | VLTVGTSK          | 50 | 5179  | 1.14 | 0.12 | 10 |
| 10 C29E4.7                    | GIEAEVVNLNVTDK    | 17 | 1860  | 1.17 | 0.32 | 27 |
| 7 C29E4.7                     | VLTVGTSK          | 43 | 3731  | 1.18 | 0.13 | 11 |
| 22 C29E4.8                    | YGFILDGFPRTSGQAEK | 47 | 2583  | 0.46 | 0.04 | 8  |
| 1 C29E4.8                     | AHIDQVFAK         | 54 | 25953 | 0.51 | 0.08 | 16 |
| 1 C29E4.8                     | AHIDQVFAK         | 27 | 41428 | 0.52 | 0.04 | 8  |
| 1 C29E4.8                     | RLVQYHQMTVPLVDYYK | 18 | 2560  | 0.58 | 0.28 | 47 |
| 10 C29E4.8                    | LDEILERRK         | 11 | 10507 | 0.63 | 0.22 | 34 |
| 10 C29E4.8                    | LDEILERRK         | 14 | 9384  | 0.67 | 0.24 | 36 |
| 22 C29E4.8                    | AHIDQVFAK         | 47 | 71147 | 0.68 | 0.14 | 20 |
| 22 C29E4.8                    | AHIDQVFAK         | 23 | 3644  | 0.73 | 0.07 | 10 |
| 7 C29E4.8                     | AHIDQVFAK         | 14 | 3183  | 0.75 | 0.08 | 11 |
| 22 C29E4.8                    | AHIDQVFAK         | 45 | 83113 | 0.75 | 0.03 | 4  |
| 7 C29E4.8                     | AHIDQVFAK         | 31 | 3191  | 0.76 | 0.15 | 20 |
| 7 C29E4.8                     | AHIDQVFAK         | 17 | 2578  | 0.81 | 0.12 | 15 |
| 7 C29E4.8                     | AHIDQVFAK         | 10 | 3614  | 0.81 | 0.10 | 13 |
| 7 C29E4.8                     | RLVQYHQMTVPLVDYYK | 25 | 6958  | 0.87 | 0.16 | 18 |
| 22 C29E4.8                    | AHIDQVFAK         | 20 | 4283  | 0.91 | 0.10 | 11 |
| 22 C29E4.8                    | RLVQYHQMTVPLVDYYK | 24 | 9874  | 0.92 | 0.30 | 32 |
| 22 C29E4.8                    | RLVQYHQMTVPLVDYYK | 30 | 6421  | 0.96 | 0.11 | 11 |
| 10 C29E4.8                    | AHIDQVFAK         | 11 | 3300  | 1.00 | 0.24 | 24 |
| 1 C29E4.8                     | LDEILERRK         | 19 | 3177  | 1.07 | 0.47 | 44 |
| 10 C29E4.8                    | RLVQYHQMTVPLVDYYK | 20 | 10641 | 1.09 | 0.14 | 13 |
| 7 C29E4.8                     | RLVQYHQMTVPLVDYYK | 37 | 6544  | 1.17 | 0.28 | 24 |
| 10 C29E4.8                    | RLVQYHQMTVPLVDYYK | 19 | 10201 | 1.19 | 0.16 | 14 |
| 10 C29E4.8                    | RLVQYHQMTVPLVDYYK | 15 | 4814  | 1.20 | 0.17 | 14 |
| 7 C29E4.8                     | AHIDQVFAK         | 35 | 10544 | 1.53 | 0.11 | 7  |
| 7 C29E4.8                     | GTQAPAFQK         | 37 | 4649  | 1.82 | 0.06 | 4  |
| 22 C29E4.8                    | AHIDQVFAK         | 41 | 18595 | 1.87 | 0.12 | 6  |
| 1 C29E4.8                     | GTQAPAFQK         | 26 | 11385 | 1.90 | 0.08 | 4  |
| 1 C29E4.8                     | GTQAPAFQK         | 67 | 14476 | 1.90 | 0.17 | 9  |
| 7 C29E4.8                     | GTQAPAFQK         | 35 | 8409  | 1.93 | 0.11 | 6  |
| 10 C29E4.8                    | AHIDQVFAK         | 33 | 16331 | 1.97 | 0.09 | 5  |
| 10 C29E4.8                    | GTQAPAFQK         | 31 | 13157 | 2.04 | 0.24 | 12 |
| 1 C29E4.8                     | AHIDQVFAK         | 12 | 12210 | 2.21 | 0.09 | 4  |
| 10 C29E4.8                    | AHIDQVFAK         | 17 | 12560 | 2.28 | 0.02 | 1  |
| 22 C29E4.8                    | GTQAPAFQK         | 36 | 9164  | 2.30 | 0.10 | 5  |
| 22 C29E4.8                    | AHIDQVFAK         | 40 | 9874  | 2.32 | 0.12 | 5  |
| 22 C29E4.8                    | GTQAPAFQK         | 46 | 12847 | 2.82 | 0.25 | 9  |
| 10 C29E6.4                    | MITSK             | 12 | 170   | 1.56 | 0.09 | 6  |
| 22 C29F5.1                    | AHLEIFAK          | 29 | 8170  | 0.79 | 0.17 | 22 |
| 10 C29F5.1                    | AHLEIFAK          | 41 | 11298 | 0.80 | 0.31 | 39 |
| 10 C29F5.1                    | AHLEIFAK          | 22 | 8190  | 0.84 | 0.30 | 36 |
| 1 C29F5.1                     | LMQDHGVIYDVNHLK   | 46 | 3362  | 0.85 | 0.12 | 14 |
| 1 C29F5.1                     | LMQDHGVIYDVNHLK   | 43 | 3615  | 0.86 | 0.21 | 25 |
| 22 C29F5.1                    | LMQDHGVIYDVNHLK   | 39 | 3745  | 1.09 | 0.15 | 14 |
| 1 C29F5.1                     | GVRDPLATQCK       | 29 | 1898  | 1.18 | 0.13 | 11 |

|             |                    |    |       |      |      |     |
|-------------|--------------------|----|-------|------|------|-----|
| 1 C29F5.1   | GVRDFLATQCK        | 21 | 1681  | 1.26 | 0.16 | 12  |
| 10 C29F5.1  | LMQDHGVIIYDVNHLK   | 38 | 1676  | 1.27 | 0.22 | 18  |
| 10 C29F5.1  | LMQDHGVIIYDVNHLK   | 50 | 2277  | 1.28 | 0.30 | 24  |
| 7 C29F5.1   | LMQDHGVIIYDVNHLK   | 20 | 2983  | 1.43 | 0.14 | 9   |
| 22 C29F5.1  | LMQDHGVIIYDVNHLK   | 21 | 2073  | 1.84 | 0.18 | 10  |
| 22 C29F7.2  | VQLHFDAEHEESHPNLPK | 31 | 10999 | 0.74 | 0.10 | 14  |
| 22 C29F7.2  | VQLHFDAEHEESHPNLPK | 27 | 7616  | 0.80 | 0.07 | 9   |
| 22 C29F7.2  | EWLAEIEK           | 21 | 523   | 1.41 | 0.22 | 16  |
| 22 C29F7.3  | RVETYNQSTFPPIEHFEK | 59 | 13429 | 0.58 | 0.09 | 16  |
| 22 C29F7.3  | RVETYNQSTFPPIEHFEK | 48 | 15366 | 0.59 | 0.09 | 15  |
| 10 C29F7.3  | RVETYNQSTFPPIEHFEK | 48 | 5278  | 0.60 | 0.16 | 27  |
| 10 C29F7.3  | RVETYNQSTFPPIEHFEK | 45 | 6819  | 0.70 | 0.13 | 19  |
| 10 C29F7.3  | RVETYNQSTFPPIEHFEK | 55 | 7934  | 0.71 | 0.19 | 26  |
| 22 C29F7.3  | RVETYNQSTFPPIEHFEK | 42 | 10001 | 0.76 | 0.12 | 16  |
| 10 C30C11.2 | GEEHLITRVLQVLPK    | 25 | 3921  | 0.47 | 0.33 | 69  |
| 22 C30C11.2 | GEEHLITRVLQVLPK    | 15 | 4537  | 0.64 | 0.15 | 24  |
| 7 C30C11.2  | GEEHLITRVLQVLPK    | 34 | 4194  | 0.88 | 0.48 | 55  |
| 7 C30C11.2  | GEEHLITRVLQVLPK    | 18 | 4109  | 2.72 | 0.33 | 12  |
| 1 C30C11.4  | RLSELK             | 13 | 1249  | 0.19 | 0.22 | 116 |
| 22 C30C11.4 | TDAPVVFTEEILQNK    | 75 | 2015  | 0.24 | 0.31 | 131 |
| 1 C30C11.4  | RLSELK             | 17 | 3019  | 0.24 | 0.09 | 37  |
| 22 C30C11.4 | TDAPVVFTEEILQNK    | 86 | 2190  | 0.24 | 0.49 | 201 |
| 1 C30C11.4  | RLSELK             | 12 | 1179  | 0.26 | 0.25 | 95  |
| 22 C30C11.4 | TDAPVVFTEEILQNK    | 84 | 1471  | 0.29 | 0.27 | 92  |
| 7 C30C11.4  | TDAPVVFTEEILQNK    | 46 | 1112  | 0.32 | 0.06 | 20  |
| 10 C30C11.4 | LRTIVESQLSDVK      | 24 | 2257  | 0.36 | 0.12 | 32  |
| 10 C30C11.4 | LRTIVESQLSDVK      | 40 | 2086  | 0.40 | 0.20 | 50  |
| 7 C30C11.4  | TDAPVVFTEEILQNK    | 72 | 1332  | 0.42 | 0.33 | 77  |
| 10 C30C11.4 | LRTIVESQLSDVK      | 22 | 1847  | 0.44 | 0.20 | 45  |
| 22 C30C11.4 | TDAPVVFTEEILQNK    | 93 | 1792  | 0.45 | 0.41 | 92  |
| 10 C30C11.4 | TDAPVVFTEEILQNK    | 62 | 703   | 0.46 | 0.14 | 31  |
| 7 C30C11.4  | NVFENVVNPILNK      | 22 | 2161  | 0.46 | 0.17 | 38  |
| 22 C30C11.4 | AYEDYANGGPTYAHLDSK | 48 | 2809  | 0.48 | 0.21 | 43  |
| 10 C30C11.4 | LRTIVESQLSDVK      | 18 | 2440  | 0.49 | 0.27 | 55  |
| 22 C30C11.4 | NVFENVVNPILNK      | 46 | 2714  | 0.50 | 0.17 | 34  |
| 22 C30C11.4 | NVFENVVNPILNK      | 53 | 2770  | 0.52 | 0.16 | 31  |
| 22 C30C11.4 | NVFENVVNPILNK      | 52 | 3506  | 0.53 | 0.12 | 22  |
| 10 C30C11.4 | AYEDYANGGPTYAHLDSK | 19 | 1632  | 0.55 | 0.25 | 45  |
| 22 C30C11.4 | AYEDYANGGPTYAHLDSK | 33 | 2308  | 0.55 | 0.20 | 35  |
| 10 C30C11.4 | LRTIVESQLSDVK      | 25 | 2697  | 0.56 | 0.18 | 32  |
| 22 C30C11.4 | NVFENVVNPILNK      | 42 | 1600  | 0.57 | 0.25 | 44  |
| 10 C30C11.4 | TDAPVVFTEEILQNK    | 58 | 917   | 0.58 | 0.14 | 25  |
| 22 C30C11.4 | NVFENVVNPILNK      | 57 | 3466  | 0.60 | 0.18 | 29  |
| 10 C30C11.4 | NVFENVVNPILNK      | 22 | 972   | 0.62 | 0.11 | 17  |
| 10 C30C11.4 | NVFENVVNPILNK      | 56 | 1985  | 0.65 | 0.19 | 30  |
| 7 C30C11.4  | NVFENVVNPILNK      | 30 | 2601  | 0.69 | 0.15 | 22  |
| 22 C30C11.4 | NVFENVVNPILNK      | 46 | 1950  | 0.71 | 0.23 | 33  |
| 10 C30C11.4 | NVFENVVNPILNK      | 38 | 1547  | 0.71 | 0.21 | 29  |
| 7 C30C11.4  | VINAIEDK           | 16 | 825   | 0.71 | 0.26 | 37  |
| 1 C30C11.4  | NVFENVVNPILNK      | 47 | 1643  | 0.72 | 0.09 | 12  |
| 1 C30C11.4  | AYEDYANGGPTYAHLDSK | 29 | 1861  | 0.72 | 0.12 | 16  |
| 10 C30C11.4 | LRTIVESQLSDVK      | 25 | 2265  | 0.73 | 0.31 | 42  |
| 22 C30C11.4 | LRTIVESQLSDVK      | 33 | 4641  | 0.74 | 0.28 | 38  |
| 1 C30C11.4  | AYEDYANGGPTYAHLDSK | 29 | 1931  | 0.74 | 0.15 | 20  |
| 10 C30C11.4 | TDAPVVFTEEILQNK    | 75 | 1148  | 0.75 | 0.22 | 29  |
| 22 C30C11.4 | NVFENVVNPILNK      | 50 | 2138  | 0.75 | 0.19 | 25  |
| 10 C30C11.4 | TDAPVVFTEEILQNK    | 90 | 1321  | 0.80 | 0.16 | 20  |
| 22 C30C11.4 | NVFENVVNPILNK      | 44 | 2501  | 0.82 | 0.28 | 34  |
| 1 C30C11.4  | AYEDYANGGPTYAHLDSK | 11 | 2193  | 0.83 | 0.15 | 18  |
| 10 C30C11.4 | NVFENVVNPILNK      | 42 | 1433  | 0.85 | 0.18 | 21  |
| 10 C30C11.4 | NVFENVVNPILNK      | 52 | 1762  | 0.88 | 0.17 | 20  |
| 7 C30C11.4  | TDAPVVFTEEILQNK    | 53 | 802   | 0.90 | 0.23 | 26  |
| 22 C30C11.4 | FHNLELQMQESDAREK   | 15 | 2676  | 0.90 | 0.45 | 50  |
| 22 C30C11.4 | LRTIVESQLSDVK      | 19 | 3122  | 0.92 | 0.04 | 4   |
| 1 C30C11.4  | TDAPVVFTEEILQNK    | 67 | 963   | 0.92 | 0.29 | 31  |
| 22 C30C11.4 | LRTIVESQLSDVK      | 16 | 2811  | 0.92 | 0.11 | 12  |
| 10 C30C11.4 | NVFENVVNPILNK      | 49 | 2543  | 0.93 | 0.23 | 25  |
| 10 C30C11.4 | AYEDYANGGPTYAHLDSK | 33 | 2040  | 0.96 | 0.20 | 21  |
| 10 C30C11.4 | NVFENVVNPILNK      | 48 | 2276  | 0.97 | 0.11 | 11  |
| 7 C30C11.4  | AYEDYANGGPTYAHLDSK | 25 | 1597  | 0.98 | 0.25 | 25  |
| 7 C30C11.4  | TDAPVVFTEEILQNK    | 45 | 1174  | 0.98 | 0.13 | 13  |
| 1 C30C11.4  | AYEDYANGGPTYAHLDSK | 27 | 2438  | 1.01 | 0.16 | 16  |
| 22 C30C11.4 | TDAPVVFTEEILQNK    | 63 | 2173  | 1.01 | 0.20 | 20  |
| 7 C30C11.4  | FHNLELQMQESDAREK   | 29 | 7197  | 1.02 | 0.14 | 14  |
| 10 C30C11.4 | NVFENVVNPILNK      | 68 | 4770  | 1.05 | 0.15 | 14  |
| 22 C30C11.4 | NVFENVVNPILNK      | 47 | 2068  | 1.07 | 0.14 | 13  |
| 1 C30C11.4  | FHNLELQMQESDAREK   | 10 | 5687  | 1.08 | 0.11 | 11  |
| 10 C30C11.4 | FHNLELQMQESDAREK   | 14 | 5347  | 1.09 | 0.14 | 13  |
| 1 C30C11.4  | AYEDYANGGPTYAHLDSK | 10 | 340   | 1.10 | 0.20 | 18  |
| 7 C30C11.4  | TDAPVVFTEEILQNK    | 80 | 1161  | 1.11 | 0.30 | 27  |
| 7 C30C11.4  | AYEDYANGGPTYAHLDSK | 40 | 2043  | 1.11 | 0.13 | 12  |
| 1 C30C11.4  | NVFENVVNPILNK      | 32 | 1452  | 1.14 | 0.15 | 13  |
| 22 C30C11.4 | LRTIVESQLSDVK      | 36 | 4015  | 1.15 | 0.21 | 19  |
| 7 C30C11.4  | NVFENVVNPILNK      | 45 | 2829  | 1.18 | 0.16 | 14  |
| 7 C30C11.4  | NVFENVVNPILNK      | 25 | 1560  | 1.19 | 0.23 | 19  |
| 10 C30C11.4 | NVFENVVNPILNK      | 47 | 2225  | 1.20 | 0.17 | 14  |
| 22 C30C11.4 | TDAPVVFTEEILQNK    | 85 | 2422  | 1.22 | 0.13 | 10  |
| 10 C30C11.4 | NVFENVVNPILNK      | 46 | 2322  | 1.23 | 0.19 | 15  |
| 10 C30C11.4 | FHNLELQMQESDAREK   | 17 | 6287  | 1.24 | 0.18 | 14  |
| 10 C30C11.4 | NVFENVVNPILNK      | 81 | 5266  | 1.25 | 0.15 | 12  |
| 10 C30C11.4 | FHNLELQMQESDAREK   | 17 | 5123  | 1.25 | 0.28 | 23  |
| 1 C30C11.4  | TDAPVVFTEEILQNK    | 60 | 987   | 1.26 | 0.23 | 18  |
| 22 C30C11.4 | MQRQEFEDLAAPIFNRIK | 22 | 3363  | 1.27 | 0.15 | 12  |
| 7 C30C11.4  | NVFENVVNPILNK      | 70 | 3408  | 1.30 | 0.16 | 12  |
| 22 C30C11.4 | MQRQEFEDLAAPIFNRIK | 13 | 3671  | 1.32 | 0.14 | 10  |
| 7 C30C11.4  | NVFENVVNPILNK      | 32 | 1626  | 1.33 | 0.16 | 12  |
| 1 C30C11.4  | NSLEEYVYEMRDK      | 10 | 635   | 1.35 | 0.19 | 14  |
| 22 C30C11.4 | NVFENVVNPILNK      | 62 | 4461  | 1.36 | 0.12 | 9   |
| 10 C30C11.4 | TDAPVVFTEEILQNK    | 53 | 691   | 1.45 | 0.21 | 15  |
| 22 C30C11.4 | LRTIVESQLSDVK      | 34 | 3186  | 1.45 | 0.22 | 15  |
| 10 C30C11.4 | NVFENVVNPILNK      | 37 | 1620  | 1.54 | 0.28 | 19  |

|                        |                                 |    |       |      |      |     |
|------------------------|---------------------------------|----|-------|------|------|-----|
| 10 C30C11.4            | NVFENVVNPILNK                   | 45 | 1191  | 1.54 | 0.11 | 7   |
| 22 C30C11.4            | LRTIVESQLSDVK                   | 38 | 3496  | 1.55 | 0.20 | 13  |
| 1 C30C11.4             | TDAPVVFTTEILQNK                 | 90 | 1001  | 1.59 | 0.11 | 7   |
| 7 C30C11.4             | TDAPVVFTTEILQNK                 | 86 | 1013  | 1.59 | 0.26 | 16  |
| 10 C30C11.4            | NVFENVVNPILNK                   | 27 | 1677  | 1.65 | 0.19 | 12  |
| 1 C30C11.4             | TDAPVVFTTEILQNK                 | 46 | 863   | 1.73 | 0.18 | 10  |
| 7 C30C11.4             | FHNLELQMQESDAREK                | 10 | 2848  | 1.92 | 0.18 | 9   |
| 22 C30C11.4            | FHNLELQMQESDAREK                | 15 | 7843  | 1.94 | 0.13 | 7   |
| 1 C30C11.4             | NVFENVVNPILNK                   | 65 | 2932  | 2.36 | 0.14 | 6   |
| 1 C30H7.2b;C30H7.2a    | LREFVLDLHSGK                    | 12 | 1391  | 0.57 | 0.25 | 44  |
| 7 C30H7.2b;C30H7.2a    | NALQAAHNPEK                     | 49 | 2564  | 0.69 | 0.06 | 9   |
| 1 C30H7.2b;C30H7.2a    | IFTDAIVRELPDQRK                 | 12 | 2030  | 0.70 | 0.21 | 31  |
| 7 C30H7.2b;C30H7.2a    | NALQAAHNPEK                     | 58 | 3526  | 0.71 | 0.09 | 13  |
| 22 C30H7.2b;C30H7.2a   | IFTDAIVRELPDQRK                 | 25 | 4058  | 0.79 | 0.29 | 37  |
| 10 C30H7.2b;C30H7.2a   | IFTDAIVRELPDQRK                 | 28 | 4157  | 0.94 | 0.29 | 31  |
| 22 C30H7.2b;C30H7.2a   | IFTDAIVRELPDQRK                 | 26 | 3719  | 0.99 | 0.30 | 30  |
| 10 C30H7.2b;C30H7.2a   | LREFVLDLHSGK                    | 18 | 752   | 1.14 | 0.16 | 14  |
| 1 C30H7.2b;C30H7.2a    | LVFQPSNK                        | 10 | 1839  | 1.14 | 0.10 | 8   |
| 1 C30H7.2b;C30H7.2a    | IFTDAIVRELPDQRK                 | 10 | 2087  | 1.17 | 0.22 | 19  |
| 10 C30H7.2b;C30H7.2a   | NALQAAHNPEK                     | 76 | 6822  | 1.27 | 0.14 | 11  |
| 22 C30H7.2b;C30H7.2a   | NALQAAHNPEK                     | 67 | 10756 | 1.34 | 0.09 | 6   |
| 10 C30H7.2b;C30H7.2a   | IFTDAIVRELPDQRK                 | 22 | 3447  | 1.45 | 0.21 | 14  |
| 10 C30H7.2b;C30H7.2a   | LREFVLDLHSGK                    | 15 | 1630  | 1.52 | 0.32 | 21  |
| 22 C31C9.2             | ITAELLAASAGK                    | 52 | 6421  | 0.24 | 0.29 | 121 |
| 22 C31C9.2             | DELLVTL PQHDAVIVRSATK           | 29 | 12457 | 0.30 | 0.15 | 50  |
| 22 C31C9.2             | VIGFDPMVTK                      | 17 | 1332  | 0.40 | 0.06 | 15  |
| 10 C31C9.2             | VIGFDPMVTK                      | 14 | 1428  | 0.42 | 0.06 | 15  |
| 10 C31C9.2             | LVGRAGTGV DNIDVPAASANK          | 36 | 1922  | 0.47 | 0.11 | 23  |
| 7 C31C9.2              | VIGFDPMVTK                      | 37 | 2147  | 0.54 | 0.09 | 16  |
| 7 C31C9.2              | VIGFDPMVTK                      | 11 | 1346  | 0.55 | 0.22 | 39  |
| 10 C31C9.2             | QTENLINK                        | 25 | 1634  | 0.56 | 0.25 | 45  |
| 10 C31C9.2             | VIGFDPMVTK                      | 23 | 1813  | 0.61 | 0.18 | 30  |
| 22 C31C9.2             | DELLVTL PQHDAVIVRSATK           | 25 | 7343  | 0.61 | 0.24 | 39  |
| 22 C31C9.2             | QTENLINK                        | 41 | 2232  | 0.61 | 0.21 | 34  |
| 22 C31C9.2             | ITAELLAASAGK                    | 68 | 1620  | 0.68 | 0.10 | 14  |
| 22 C31C9.2             | VIGFDPMVTK                      | 17 | 1965  | 0.71 | 0.10 | 14  |
| 10 C31C9.2             | QTENLINK                        | 12 | 1121  | 0.71 | 0.25 | 36  |
| 22 C31C9.2             | VIGFDPMVTK                      | 23 | 1468  | 0.72 | 0.23 | 32  |
| 7 C31C9.2              | QTENLINK                        | 20 | 1053  | 0.73 | 0.30 | 41  |
| 22 C31C9.2             | ITAELLAASAGK                    | 48 | 8349  | 0.73 | 0.44 | 59  |
| 22 C31C9.2             | LVGRAGTGV DNIDVPAASANK          | 41 | 28211 | 0.74 | 0.21 | 28  |
| 1 C31C9.2              | ITAELLAASAGK                    | 23 | 1008  | 0.76 | 0.10 | 13  |
| 10 C31C9.2             | LVGRAGTGV DNIDVPAASANK          | 64 | 28365 | 0.80 | 0.19 | 24  |
| 22 C31C9.2             | QNGIEVTVK                       | 35 | 4055  | 0.81 | 0.08 | 10  |
| 22 C31C9.2             | QTENLINK                        | 31 | 2425  | 0.84 | 0.25 | 30  |
| 10 C31C9.2             | ITAELLAASAGK                    | 50 | 2199  | 0.84 | 0.19 | 23  |
| 10 C31C9.2             | DELLVTL PQHDAVIVRSATK           | 15 | 10379 | 0.84 | 0.24 | 28  |
| 7 C31C9.2              | ITAELLAASAGK                    | 54 | 3685  | 0.89 | 0.08 | 9   |
| 22 C31C9.2             | LVGRAGTGV DNIDVPAASANK          | 80 | 27284 | 0.90 | 0.12 | 13  |
| 1 C31C9.2              | LVGRAGTGV DNIDVPAASANK          | 29 | 6819  | 0.90 | 0.25 | 27  |
| 10 C31C9.2             | LVGRAGTGV DNIDVPAASANK          | 27 | 20385 | 0.91 | 0.15 | 16  |
| 10 C31C9.2             | ITAELLAASAGK                    | 41 | 1778  | 0.93 | 0.17 | 18  |
| 10 C31C9.2             | QNGIEVTVK                       | 37 | 3555  | 0.94 | 0.10 | 10  |
| 22 C31C9.2             | QNGIEVTVK                       | 40 | 5118  | 0.97 | 0.11 | 12  |
| 22 C31C9.2             | LVGRAGTGV DNIDVPAASANK          | 17 | 4813  | 0.97 | 0.17 | 18  |
| 7 C31C9.2              | QNGIEVTVK                       | 34 | 3179  | 0.97 | 0.15 | 15  |
| 22 C31C9.2             | QNGIEVTVK                       | 33 | 3417  | 0.98 | 0.13 | 14  |
| 7 C31C9.2              | QTENLINK                        | 18 | 1048  | 0.99 | 0.24 | 24  |
| 22 C31C9.2             | ITAELLAASAGK                    | 44 | 1121  | 1.02 | 0.11 | 10  |
| 1 C31C9.2              | ITAELLAASAGK                    | 50 | 3277  | 1.03 | 0.07 | 7   |
| 7 C31C9.2              | ITAELLAASAGK                    | 68 | 3250  | 1.04 | 0.09 | 9   |
| 22 C31C9.2             | LVGRAGTGV DNIDVPAASANK          | 16 | 7069  | 1.05 | 0.20 | 19  |
| 7 C31C9.2              | QNGIEVTVK                       | 27 | 4929  | 1.09 | 0.23 | 21  |
| 7 C31C9.2              | ITAELLAASAGK                    | 58 | 4381  | 1.09 | 0.12 | 11  |
| 10 C31C9.2             | DELLVTL PQHDAVIVRSATK           | 26 | 13033 | 1.12 | 0.27 | 24  |
| 7 C31C9.2              | QTENLINK                        | 14 | 855   | 1.12 | 0.32 | 29  |
| 7 C31C9.2              | VIGFDPMVTK                      | 14 | 788   | 1.20 | 0.11 | 9   |
| 10 C31C9.2             | QNGIEVTVK                       | 14 | 2784  | 1.23 | 0.11 | 9   |
| 7 C31C9.2              | ITAELLAASAGK                    | 88 | 5816  | 1.24 | 0.13 | 11  |
| 1 C31C9.2              | ITAELLAASAGK                    | 46 | 3878  | 1.28 | 0.13 | 10  |
| 22 C31C9.2             | VIGFDPMVTK                      | 23 | 1542  | 1.28 | 0.14 | 11  |
| 7 C31C9.2              | LVGRAGTGV DNIDVPAASANK          | 34 | 7703  | 1.31 | 0.21 | 16  |
| 7 C31C9.2              | LVGRAGTGV DNIDVPAASANK          | 23 | 6785  | 1.37 | 0.20 | 15  |
| 10 C31C9.2             | ITAELLAASAGK                    | 36 | 1695  | 1.39 | 0.14 | 10  |
| 22 C31C9.2             | QNGIEVTVK                       | 27 | 2229  | 1.40 | 0.07 | 5   |
| 7 C31C9.2              | QTENLINK                        | 13 | 958   | 1.59 | 0.34 | 21  |
| 22 C31C9.2             | VIGFDPMVTK                      | 11 | 965   | 1.64 | 0.04 | 3   |
| 10 C31C9.2             | ITAELLAASAGK                    | 86 | 5172  | 2.12 | 0.16 | 7   |
| 10 C31C9.2             | ITAELLAASAGK                    | 45 | 960   | 2.48 | 0.08 | 3   |
| 22 C32E8.2a            | VAAQLRGDVLPLSHTITFDEPRQVTD AERK | 18 | 13923 | 0.67 | 0.12 | 18  |
| 22 C32E8.2a            | VAAQLRGDVLPLSHTITFDEPRQVTD AERK | 16 | 4189  | 0.95 | 0.15 | 15  |
| 22 C32E8.2a            | VAAQLRGDVLPLSHTITFDEPRQVTD AERK | 12 | 4198  | 1.24 | 0.10 | 8   |
| 22 C32E8.2a            | VAAQLRGDVLPLSHTITFDEPRQVTD AERK | 11 | 5708  | 1.38 | 0.14 | 10  |
| 10 C32E8.2a;C32E8.2b   | TWFDQPARK                       | 16 | 18302 | 1.55 | 0.08 | 5   |
| 10 C32E8.9             | VVRPSAALLEVFK                   | 21 | 1530  | 0.69 | 0.15 | 21  |
| 1 C32E8.9              | VVRPSAALLEVFK                   | 36 | 828   | 0.87 | 0.21 | 24  |
| 10 C32F10.8a;C32F10.8b | HVAEYIK                         | 20 | 3700  | 0.17 | 0.31 | 187 |
| 10 C32F10.8a;C32F10.8b | HVAEYIK                         | 20 | 4463  | 0.19 | 0.23 | 117 |
| 10 C32F10.8a;C32F10.8b | HVAEYIK                         | 16 | 7958  | 0.27 | 0.26 | 97  |
| 10 C32F10.8a;C32F10.8b | HVAEYIK                         | 21 | 7628  | 0.30 | 0.20 | 68  |
| 7 C32F10.8a;C32F10.8b  | ERATLVEK                        | 10 | 1642  | 0.33 | 0.46 | 140 |
| 1 C32F10.8a;C32F10.8b  | MELASFHSVSK                     | 15 | 458   | 0.41 | 0.12 | 30  |
| 22 C32F10.8a;C32F10.8b | LFINHNNAK                       | 75 | 20365 | 0.55 | 0.22 | 40  |
| 1 C32F10.8a;C32F10.8b  | MELASFHSVSK                     | 16 | 2025  | 0.57 | 0.30 | 52  |
| 7 C32F10.8a;C32F10.8b  | DAVLASLK                        | 11 | 2740  | 0.60 | 0.24 | 41  |
| 22 C32F10.8a;C32F10.8b | LFINHNNAK                       | 52 | 19181 | 0.61 | 0.20 | 32  |
| 1 C32F10.8a;C32F10.8b  | LFINHNNAK                       | 51 | 14427 | 0.68 | 0.15 | 22  |
| 22 C32F10.8a;C32F10.8b | MELASFHSVSK                     | 54 | 3376  | 0.72 | 0.10 | 13  |
| 1 C32F10.8a;C32F10.8b  | LFINHNNAK                       | 53 | 11017 | 0.74 | 0.22 | 29  |
| 22 C32F10.8a;C32F10.8b | VLVEMGEPYNK                     | 13 | 1127  | 0.79 | 0.29 | 37  |
| 22 C32F10.8a;C32F10.8b | MELASFHSVSK                     | 32 | 1134  | 0.79 | 0.20 | 25  |

|                        |                    |    |       |      |      |    |
|------------------------|--------------------|----|-------|------|------|----|
| 22 C32F10.8a;C32F10.8b | DMLSRFTDFHQK       | 38 | 2232  | 0.80 | 0.21 | 26 |
| 10 C32F10.8a;C32F10.8b | DMLSRFTDFHQK       | 11 | 4512  | 0.81 | 0.16 | 20 |
| 1 C32F10.8a;C32F10.8b  | DMLSRFTDFHQK       | 13 | 4204  | 0.84 | 0.12 | 14 |
| 7 C32F10.8a;C32F10.8b  | MELASFHSVSK        | 20 | 1110  | 0.85 | 0.09 | 10 |
| 22 C32F10.8a;C32F10.8b | DMLSRFTDFHQK       | 19 | 2270  | 0.87 | 0.24 | 28 |
| 10 C32F10.8a;C32F10.8b | MELASFHSVSK        | 44 | 2113  | 0.89 | 0.14 | 16 |
| 10 C32F10.8a;C32F10.8b | DMLSRFTDFHQK       | 23 | 3806  | 0.89 | 0.12 | 14 |
| 22 C32F10.8a;C32F10.8b | MELASFHSVSK        | 78 | 10538 | 0.92 | 0.15 | 17 |
| 10 C32F10.8a;C32F10.8b | ERATLVEK           | 11 | 3310  | 0.92 | 0.17 | 19 |
| 1 C32F10.8a;C32F10.8b  | DMLSRFTDFHQK       | 16 | 4605  | 0.93 | 0.06 | 6  |
| 22 C32F10.8a;C32F10.8b | DMLSRFTDFHQK       | 26 | 10921 | 0.94 | 0.15 | 16 |
| 7 C32F10.8a;C32F10.8b  | HVAEYIK            | 17 | 2194  | 0.94 | 0.11 | 12 |
| 22 C32F10.8a;C32F10.8b | LFINHNNAK          | 28 | 4574  | 0.94 | 0.30 | 32 |
| 22 C32F10.8a;C32F10.8b | DMLSRFTDFHQK       | 15 | 6399  | 0.94 | 0.05 | 5  |
| 1 C32F10.8a;C32F10.8b  | SAGAYSQSTGVEIVRK   | 13 | 5621  | 0.96 | 0.14 | 14 |
| 10 C32F10.8a;C32F10.8b | HVAEYIK            | 13 | 4814  | 0.97 | 0.09 | 9  |
| 22 C32F10.8a;C32F10.8b | DGTYHFRTTILPQPELFK | 27 | 8829  | 0.97 | 0.14 | 15 |
| 10 C32F10.8a;C32F10.8b | MELASFHSVSK        | 54 | 3069  | 0.98 | 0.19 | 20 |
| 1 C32F10.8a;C32F10.8b  | VLVEMGEPYNK        | 26 | 2544  | 0.98 | 0.10 | 11 |
| 10 C32F10.8a;C32F10.8b | MELASFHSVSK        | 37 | 2026  | 1.00 | 0.12 | 12 |
| 22 C32F10.8a;C32F10.8b | SAGAYSQSTGVEIVRK   | 99 | 6474  | 1.02 | 0.13 | 13 |
| 10 C32F10.8a;C32F10.8b | MELASFHSVSK        | 57 | 3608  | 1.02 | 0.15 | 15 |
| 1 C32F10.8a;C32F10.8b  | DMLSRFTDFHQK       | 11 | 2949  | 1.05 | 0.14 | 13 |
| 1 C32F10.8a;C32F10.8b  | SAGAYSQSTGVEIVRK   | 12 | 8454  | 1.06 | 0.09 | 8  |
| 7 C32F10.8a;C32F10.8b  | DMLSRFTDFHQK       | 12 | 5947  | 1.06 | 0.08 | 8  |
| 22 C32F10.8a;C32F10.8b | MELASFHSVSK        | 70 | 8975  | 1.06 | 0.13 | 12 |
| 1 C32F10.8a;C32F10.8b  | HVAEYIK            | 15 | 4729  | 1.10 | 0.17 | 15 |
| 1 C32F10.8a;C32F10.8b  | SAGAYSQSTGVEIVRK   | 72 | 3449  | 1.15 | 0.15 | 13 |
| 1 C32F10.8a;C32F10.8b  | HVAEYIK            | 32 | 15563 | 1.16 | 0.09 | 8  |
| 22 C32F10.8a;C32F10.8b | SAGAYSQSTGVEIVRK   | 90 | 5714  | 1.18 | 0.13 | 11 |
| 1 C32F10.8a;C32F10.8b  | DMLSRFTDFHQK       | 19 | 3626  | 1.19 | 0.15 | 13 |
| 1 C32F10.8a;C32F10.8b  | HVAEYIK            | 17 | 4591  | 1.20 | 0.09 | 7  |
| 1 C32F10.8a;C32F10.8b  | MELASFHSVSK        | 37 | 7781  | 1.21 | 0.05 | 4  |
| 1 C32F10.8a;C32F10.8b  | MELASFHSVSK        | 27 | 9014  | 1.22 | 0.10 | 8  |
| 1 C32F10.8a;C32F10.8b  | VLVEMGEPYNK        | 30 | 2144  | 1.22 | 0.20 | 16 |
| 22 C32F10.8a;C32F10.8b | DMLSRFTDFHQK       | 10 | 5591  | 1.23 | 0.12 | 10 |
| 10 C32F10.8a;C32F10.8b | DGTYHFRTTILPQPELFK | 11 | 5088  | 1.25 | 0.14 | 11 |
| 1 C32F10.8a;C32F10.8b  | HVAEYIK            | 30 | 19037 | 1.26 | 0.06 | 5  |
| 7 C32F10.8a;C32F10.8b  | LFINHNNAK          | 37 | 8344  | 1.29 | 0.04 | 3  |
| 10 C32F10.8a;C32F10.8b | HVAEYIK            | 16 | 5225  | 1.31 | 0.18 | 14 |
| 22 C32F10.8a;C32F10.8b | LFINHNNAK          | 46 | 7767  | 1.34 | 0.00 | 0  |
| 1 C32F10.8a;C32F10.8b  | TLNTSNINPNVIK      | 46 | 5430  | 1.34 | 0.11 | 8  |
| 22 C32F10.8a;C32F10.8b | HVAEYIK            | 32 | 35913 | 1.35 | 0.08 | 6  |
| 7 C32F10.8a;C32F10.8b  | MELASFHSVSK        | 69 | 3968  | 1.36 | 0.07 | 5  |
| 7 C32F10.8a;C32F10.8b  | SAGAYSQSTGVEIVRK   | 79 | 2321  | 1.38 | 0.19 | 14 |
| 10 C32F10.8a;C32F10.8b | LFINHNNAK          | 55 | 13645 | 1.38 | 0.16 | 12 |
| 7 C32F10.8a;C32F10.8b  | LFINHNNAK          | 23 | 10734 | 1.39 | 0.25 | 18 |
| 22 C32F10.8a;C32F10.8b | HVAEYIK            | 39 | 42120 | 1.41 | 0.08 | 6  |
| 7 C32F10.8a;C32F10.8b  | TLNTSNINPNVIK      | 65 | 7967  | 1.50 | 0.09 | 6  |
| 7 C32F10.8a;C32F10.8b  | SAGAYSQSTGVEIVRK   | 12 | 6442  | 1.50 | 0.19 | 13 |
| 7 C32F10.8a;C32F10.8b  | HVAEYIK            | 16 | 2227  | 1.51 | 0.10 | 7  |
| 7 C32F10.8a;C32F10.8b  | HVAEYIK            | 12 | 5331  | 1.54 | 0.11 | 7  |
| 1 C32F10.8a;C32F10.8b  | TLNTSNINPNVIK      | 47 | 5105  | 1.56 | 0.11 | 7  |
| 7 C32F10.8a;C32F10.8b  | HVAEYIK            | 21 | 2066  | 1.57 | 0.14 | 9  |
| 22 C32F10.8a;C32F10.8b | TLNTSNINPNVIK      | 38 | 3845  | 1.57 | 0.04 | 3  |
| 7 C32F10.8a;C32F10.8b  | TLNTSNINPNVIK      | 21 | 3991  | 1.58 | 0.05 | 3  |
| 7 C32F10.8a;C32F10.8b  | SAGAYSQSTGVEIVRK   | 85 | 4006  | 1.61 | 0.13 | 8  |
| 7 C32F10.8a;C32F10.8b  | MELASFHSVSK        | 25 | 4540  | 1.62 | 0.19 | 12 |
| 1 C32F10.8a;C32F10.8b  | MELASFHSVSK        | 71 | 4185  | 1.65 | 0.13 | 8  |
| 22 C32F10.8a;C32F10.8b | MELASFHSVSK        | 50 | 6640  | 1.70 | 0.14 | 8  |
| 7 C32F10.8a;C32F10.8b  | HVAEYIK            | 14 | 2754  | 1.72 | 0.14 | 8  |
| 1 C32F10.8a;C32F10.8b  | MELASFHSVSK        | 45 | 3497  | 1.74 | 0.14 | 8  |
| 1 C32F10.8a;C32F10.8b  | SAGAYSQSTGVEIVRK   | 70 | 2676  | 1.80 | 0.20 | 11 |
| 22 C32F10.8a;C32F10.8b | HVAEYIK            | 13 | 3401  | 1.81 | 0.11 | 6  |
| 10 C32F10.8a;C32F10.8b | HVAEYIK            | 13 | 5149  | 1.81 | 0.12 | 7  |
| 10 C32F10.8a;C32F10.8b | DMLSRFTDFHQK       | 15 | 4959  | 1.83 | 0.11 | 6  |
| 7 C32F10.8a;C32F10.8b  | HVAEYIK            | 18 | 6586  | 1.84 | 0.11 | 6  |
| 7 C32F10.8a;C32F10.8b  | HVAEYIK            | 14 | 1152  | 1.89 | 0.09 | 5  |
| 10 C32F10.8a;C32F10.8b | HVAEYIK            | 14 | 4803  | 1.89 | 0.06 | 3  |
| 10 C32F10.8a;C32F10.8b | HVAEYIK            | 14 | 7997  | 1.97 | 0.13 | 7  |
| 22 C32F10.8a;C32F10.8b | HVAEYIK            | 28 | 6362  | 2.01 | 0.08 | 4  |
| 1 C32F10.8a;C32F10.8b  | HVAEYIK            | 11 | 3352  | 2.03 | 0.03 | 1  |
| 7 C32F10.8a;C32F10.8b  | MELASFHSVSK        | 37 | 4263  | 2.09 | 0.13 | 6  |
| 22 C32F10.8a;C32F10.8b | MELASFHSVSK        | 29 | 4944  | 2.21 | 0.18 | 8  |
| 10 C32F10.8a;C32F10.8b | HVAEYIK            | 16 | 6587  | 2.21 | 0.08 | 4  |
| 1 C32F10.8a;C32F10.8b  | HVAEYIK            | 14 | 4080  | 2.32 | 0.08 | 3  |
| 10 C32F10.8a;C32F10.8b | DMLSRFTDFHQK       | 24 | 3509  | 2.46 | 0.25 | 10 |
| 7 C32F10.8a;C32F10.8b  | HVAEYIK            | 18 | 4679  | 2.53 | 0.11 | 4  |
| 10 C32F10.8a;C32F10.8b | DMLSRFTDFHQK       | 23 | 4507  | 2.55 | 0.12 | 5  |
| 10 C32F10.8a;C32F10.8b | DMLSRFTDFHQK       | 17 | 7288  | 2.56 | 0.13 | 5  |
| 22 C32F10.8a;C32F10.8b | HVAEYIK            | 21 | 9227  | 2.57 | 0.12 | 5  |
| 10 C32F10.8a;C32F10.8b | DMLSRFTDFHQK       | 20 | 6074  | 2.62 | 0.13 | 5  |
| 22 C32F10.8a;C32F10.8b | HVAEYIK            | 15 | 6015  | 2.62 | 0.07 | 3  |
| 1 C32F10.8a;C32F10.8b  | HVAEYIK            | 12 | 5576  | 2.79 | 0.19 | 7  |
| 10 C32F10.8a;C32F10.8b | LFINHNNAK          | 37 | 8744  | 2.84 | 0.19 | 7  |
| 1 C32F10.8a;C32F10.8b  | HVAEYIK            | 17 | 8747  | 2.85 | 0.15 | 5  |
| 10 C32F10.8a;C32F10.8b | LFINHNNAK          | 59 | 12167 | 2.92 | 0.24 | 8  |
| 10 C32F10.8a;C32F10.8b | SAGAYSQSTGVEIVRK   | 97 | 3860  | 2.95 | 0.17 | 6  |
| 10 C32F10.8a;C32F10.8b | MELASFHSVSK        | 40 | 6383  | 2.97 | 0.11 | 4  |
| 10 C32F10.8a;C32F10.8b | MELASFHSVSK        | 74 | 10147 | 3.00 | 0.06 | 2  |
| 10 C32F10.8a;C32F10.8b | DAVLASLK           | 43 | 2908  | 3.02 | 0.15 | 5  |
| 10 C32F10.8a;C32F10.8b | SAGAYSQSTGVEIVRK   | 98 | 4789  | 3.17 | 0.22 | 7  |
| 10 C32F10.8a;C32F10.8b | HVAEYIK            | 20 | 10876 | 3.36 | 0.07 | 2  |
| 22 C32F10.8a;C32F10.8b | HVAEYIK            | 20 | 6350  | 3.52 | 0.08 | 2  |
| 10 C32F10.8a;C32F10.8b | TLNTSNINPNVIK      | 34 | 5766  | 3.55 | 0.07 | 2  |
| 10 C32F10.8a;C32F10.8b | SAGAYSQSTGVEIVRK   | 15 | 13734 | 3.56 | 0.18 | 5  |
| 10 C32F10.8a;C32F10.8b | MELASFHSVSK        | 41 | 4366  | 3.78 | 0.23 | 6  |
| 10 C32F10.8a;C32F10.8b | TLNTSNINPNVIK      | 45 | 4136  | 3.83 | 0.16 | 4  |
| 10 C32F10.8a;C32F10.8b | HVAEYIK            | 25 | 14512 | 4.02 | 0.07 | 2  |
| 10 C32F10.8a;C32F10.8b | LFINHNNAK          | 47 | 7550  | 4.06 | 0.13 | 3  |
| 10 C32F10.8a;C32F10.8b | MELASFHSVSK        | 64 | 7607  | 4.36 | 0.05 | 1  |

|                        |                      |     |       |       |      |     |
|------------------------|----------------------|-----|-------|-------|------|-----|
| 7 C32F10.8a;C32F10.8b  | TLNTSNINPNVIK        | 34  | 1658  | 4.42  | 0.63 | 14  |
| 10 C32F10.8a;C32F10.8b | MELASFHSVSK          | 44  | 6015  | 4.57  | 0.21 | 5   |
| 7 C32F10.8a;C32F10.8b  | DAVLASLK             | 28  | 1048  | 7.32  | 0.19 | 3   |
| 10 C32F10.8a;C32F10.8b | HVAEYIK              | 21  | 4110  | 9.37  | 0.24 | 3   |
| 10 C32F10.8a;C32F10.8b | HVAEYIK              | 21  | 5548  | 14.47 | 0.21 | 1   |
| 22 C34B2.7             | HSIIGIDTK            | 38  | 6232  | 1.43  | 0.18 | 12  |
| 7 C34B2.7              | HSIIGIDTK            | 16  | 1341  | 2.13  | 0.13 | 6   |
| 22 C34C12.8            | EYDDLQAESLDFK        | 30  | 1199  | 0.36  | 0.25 | 69  |
| 22 C34C12.8            | RLRGADYEEIVLTSIAGEDK | 65  | 6412  | 0.41  | 0.23 | 57  |
| 7 C34C12.8             | EYDDLQAESLDFK        | 29  | 1008  | 0.45  | 0.12 | 27  |
| 22 C34C12.8            | EYDDLQAESLDFK        | 71  | 1592  | 0.46  | 0.18 | 40  |
| 10 C34C12.8            | EYDDLQAESLDFK        | 57  | 867   | 0.50  | 0.08 | 16  |
| 10 C34C12.8            | EYDDLQAESLDFK        | 38  | 1425  | 0.50  | 0.10 | 20  |
| 10 C34C12.8            | EYDDLQAESLDFK        | 29  | 1135  | 0.52  | 0.19 | 37  |
| 7 C34C12.8             | EYDDLQAESLDFK        | 57  | 1795  | 0.55  | 0.11 | 20  |
| 10 C34C12.8            | GAFDVLLK             | 39  | 3342  | 0.64  | 0.08 | 13  |
| 22 C34C12.8            | RLRGADYEEIVLTSIAGEDK | 54  | 6326  | 0.65  | 0.24 | 37  |
| 10 C34C12.8            | EYDDLQAESLDFK        | 83  | 2341  | 0.65  | 0.07 | 11  |
| 10 C34C12.8            | EYDDLQAESLDFK        | 16  | 460   | 0.77  | 0.19 | 25  |
| 7 C34C12.8             | EYDDLQAESLDFK        | 35  | 1044  | 0.79  | 0.25 | 31  |
| 1 C34C12.8             | EYDDLQAESLDFK        | 36  | 625   | 0.82  | 0.17 | 21  |
| 10 C34C12.8            | GAFDVLLK             | 44  | 4937  | 0.82  | 0.12 | 15  |
| 22 C34C12.8            | GAFDVLLK             | 18  | 2425  | 0.82  | 0.15 | 18  |
| 22 C34C12.8            | FDPNLHEAVFQIPSANAK   | 24  | 4383  | 0.88  | 0.34 | 39  |
| 7 C34C12.8             | FDPNLHEAVFQIPSANAK   | 13  | 2760  | 0.89  | 0.12 | 14  |
| 7 C34C12.8             | FDPNLHEAVFQIPSANAK   | 14  | 2838  | 0.90  | 0.17 | 20  |
| 22 C34C12.8            | RLRGADYEEIVLTSIAGEDK | 64  | 8778  | 0.92  | 0.18 | 20  |
| 7 C34C12.8             | RLRGADYEEIVLTSIAGEDK | 30  | 3878  | 0.93  | 0.19 | 20  |
| 22 C34C12.8            | FDPNLHEAVFQIPSANAK   | 10  | 1878  | 0.96  | 0.20 | 21  |
| 22 C34C12.8            | RLRGADYEEIVLTSIAGEDK | 76  | 7286  | 0.96  | 0.12 | 13  |
| 7 C34C12.8             | GAFDVLLK             | 44  | 1057  | 0.97  | 0.11 | 11  |
| 22 C34C12.8            | RLRGADYEEIVLTSIAGEDK | 57  | 5891  | 1.00  | 0.12 | 12  |
| 22 C34C12.8            | RLRGADYEEIVLTSIAGEDK | 46  | 8919  | 1.07  | 0.13 | 12  |
| 1 C34C12.8             | EYDDLQAESLDFK        | 43  | 867   | 1.09  | 0.21 | 20  |
| 1 C34C12.8             | EYDDLQAESLDFK        | 43  | 1314  | 1.09  | 0.19 | 17  |
| 10 C34C12.8            | FDPNLHEAVFQIPSANAK   | 14  | 2266  | 1.10  | 0.18 | 17  |
| 7 C34C12.8             | GAFDVLLK             | 16  | 631   | 1.11  | 0.14 | 13  |
| 7 C34C12.8             | RLRGADYEEIVLTSIAGEDK | 67  | 4687  | 1.17  | 0.14 | 12  |
| 22 C34C12.8            | HGLVTVDPTNEK         | 62  | 11669 | 1.19  | 0.10 | 9   |
| 1 C34C12.8             | FDPNLHEAVFQIPSANAK   | 24  | 763   | 1.26  | 0.13 | 11  |
| 10 C34C12.8            | HGLVTVDPTNEK         | 70  | 9082  | 1.27  | 0.10 | 8   |
| 1 C34C12.8             | FDPNLHEAVFQIPSANAK   | 10  | 1755  | 1.29  | 0.14 | 11  |
| 7 C34C12.8             | HGLVTVDPTNEK         | 70  | 8568  | 1.32  | 0.05 | 4   |
| 7 C34C12.8             | HGLVTVDPTNEK         | 56  | 8971  | 1.35  | 0.09 | 6   |
| 10 C34C12.8            | GAFDVLLK             | 34  | 4891  | 1.39  | 0.16 | 12  |
| 22 C34C12.8            | HGLVTVDPTNEK         | 69  | 10482 | 1.45  | 0.09 | 6   |
| 10 C34C12.8            | GAFDVLLK             | 35  | 2963  | 1.47  | 0.16 | 11  |
| 1 C34C12.8             | RLRGADYEEIVLTSIAGEDK | 80  | 2630  | 1.54  | 0.27 | 18  |
| 1 C34C12.8             | HGLVTVDPTNEK         | 75  | 10499 | 1.54  | 0.14 | 9   |
| 10 C34C12.8            | FDPNLHEAVFQIPSANAK   | 18  | 2911  | 1.63  | 0.28 | 18  |
| 7 C34C12.8             | HGLVTVDPTNEK         | 64  | 5247  | 1.63  | 0.12 | 7   |
| 22 C34C12.8            | GAFDVLLK             | 45  | 5199  | 1.65  | 0.07 | 4   |
| 7 C34C12.8             | HGLVTVDPTNEK         | 78  | 8202  | 1.66  | 0.16 | 10  |
| 10 C34C12.8            | FDPNLHEAVFQIPSANAK   | 11  | 2376  | 1.74  | 0.28 | 16  |
| 1 C34C12.8             | HGLVTVDPTNEK         | 68  | 10979 | 1.75  | 0.15 | 8   |
| 1 C34C12.8             | GAFDVLLK             | 13  | 611   | 1.75  | 0.25 | 14  |
| 1 C34C12.8             | RLRGADYEEIVLTSIAGEDK | 43  | 3162  | 1.75  | 0.12 | 7   |
| 1 C34C12.8             | GAFDVLLK             | 17  | 665   | 1.83  | 0.11 | 6   |
| 10 C34C12.8            | FDPNLHEAVFQIPSANAK   | 27  | 2567  | 1.90  | 0.42 | 22  |
| 22 C34C12.8            | HGLVTVDPTNEK         | 59  | 13073 | 2.08  | 0.10 | 5   |
| 7 C34C12.8             | QPVGHIEVCTK          | 12  | 3101  | 2.12  | 0.13 | 6   |
| 22 C34C12.8            | HGLVTVDPTNEK         | 50  | 13182 | 2.28  | 0.10 | 5   |
| 10 C34C12.8            | HGLVTVDPTNEK         | 65  | 14040 | 2.72  | 0.12 | 5   |
| 1 C34C12.8             | HGLVTVDPTNEK         | 47  | 7077  | 2.79  | 0.04 | 2   |
| 1 C34C12.8             | HGLVTVDPTNEK         | 50  | 5551  | 2.84  | 0.21 | 7   |
| 10 C34C12.8            | HGLVTVDPTNEK         | 58  | 10290 | 3.01  | 0.15 | 5   |
| 1 C34E10.5             | NPNAIVTLK            | 11  | 788   | 2.29  | 0.15 | 6   |
| 10 C34E10.6            | TVLIMELINNVAK        | 51  | 1306  | 0.24  | 0.26 | 109 |
| 10 C34E10.6            | VVDLLAPYAK           | 31  | 3657  | 0.37  | 0.08 | 23  |
| 7 C34E10.6             | IGLFGGAGVGK          | 64  | 2948  | 0.37  | 0.27 | 73  |
| 10 C34E10.6            | VVDLLAPYAK           | 29  | 3813  | 0.45  | 0.21 | 47  |
| 10 C34E10.6            | IGLFGGAGVGK          | 71  | 5268  | 0.45  | 0.11 | 24  |
| 10 C34E10.6            | VVDLLAPYAK           | 16  | 5162  | 0.49  | 0.08 | 17  |
| 1 C34E10.6             | IGLFGGAGVGK          | 11  | 559   | 0.56  | 0.45 | 81  |
| 10 C34E10.6            | IGLFGGAGVGK          | 73  | 2596  | 0.60  | 0.21 | 35  |
| 10 C34E10.6            | VVDLLAPYAK           | 38  | 3668  | 0.60  | 0.41 | 68  |
| 22 C34E10.6            | TVLIMELINNVAK        | 57  | 1526  | 0.60  | 0.09 | 16  |
| 10 C34E10.6            | VVDLLAPYAK           | 22  | 4676  | 0.61  | 0.10 | 16  |
| 1 C34E10.6             | IGLFGGAGVGK          | 83  | 1452  | 0.63  | 0.23 | 36  |
| 1 C34E10.6             | VVDLLAPYAK           | 26  | 3414  | 0.64  | 0.12 | 19  |
| 10 C34E10.6            | IGLFGGAGVGK          | 36  | 2522  | 0.65  | 0.27 | 41  |
| 10 C34E10.6            | IGLFGGAGVGK          | 81  | 5420  | 0.67  | 0.34 | 50  |
| 1 C34E10.6             | VVDLLAPYAK           | 21  | 2501  | 0.68  | 0.08 | 11  |
| 1 C34E10.6             | VVDLLAPYAK           | 16  | 2859  | 0.68  | 0.06 | 9   |
| 22 C34E10.6            | IGLFGGAGVGK          | 103 | 11292 | 0.69  | 0.12 | 18  |
| 10 C34E10.6            | IGLFGGAGVGK          | 97  | 10363 | 0.73  | 0.14 | 19  |
| 22 C34E10.6            | IGLFGGAGVGK          | 102 | 8172  | 0.73  | 0.18 | 24  |
| 10 C34E10.6            | IGLFGGAGVGK          | 105 | 9274  | 0.73  | 0.11 | 14  |
| 22 C34E10.6            | IGLFGGAGVGK          | 108 | 20925 | 0.77  | 0.07 | 10  |
| 22 C34E10.6            | VVDLLAPYAK           | 49  | 5361  | 0.78  | 0.11 | 14  |
| 22 C34E10.6            | VVDLLAPYAK           | 21  | 3838  | 0.79  | 0.17 | 21  |
| 7 C34E10.6             | IGLFGGAGVGK          | 55  | 2882  | 0.83  | 0.12 | 15  |
| 22 C34E10.6            | IGLFGGAGVGK          | 114 | 7863  | 0.84  | 0.15 | 17  |
| 22 C34E10.6            | VVDLLAPYAK           | 52  | 4274  | 0.86  | 0.06 | 7   |
| 1 C34E10.6             | IGLFGGAGVGK          | 102 | 4480  | 0.86  | 0.19 | 22  |
| 1 C34E10.6             | IGLFGGAGVGK          | 107 | 4121  | 0.86  | 0.11 | 13  |
| 22 C34E10.6            | IGLFGGAGVGK          | 108 | 22995 | 0.86  | 0.08 | 9   |
| 7 C34E10.6             | IGLFGGAGVGK          | 40  | 1471  | 0.87  | 0.20 | 23  |
| 1 C34E10.6             | VVDLLAPYAK           | 34  | 3022  | 0.91  | 0.14 | 15  |
| 7 C34E10.6             | IGLFGGAGVGK          | 94  | 5401  | 0.93  | 0.13 | 14  |
| 10 C34E10.6            | VVDLLAPYAK           | 40  | 5763  | 0.95  | 0.04 | 4   |

|                        |                        |     |       |      |      |     |
|------------------------|------------------------|-----|-------|------|------|-----|
| 1 C34E10.6             | IGLFGGAGVGK            | 62  | 1342  | 0.97 | 0.20 | 21  |
| 1 C34E10.6             | IGLFGGAGVGK            | 104 | 10380 | 0.98 | 0.14 | 15  |
| 1 C34E10.6             | IGLFGGAGVGK            | 96  | 4152  | 0.99 | 0.11 | 11  |
| 7 C34E10.6             | IGLFGGAGVGK            | 78  | 4001  | 1.00 | 0.18 | 18  |
| 22 C34E10.6            | IGLFGGAGVGK            | 112 | 9712  | 1.04 | 0.13 | 13  |
| 10 C34E10.6            | IGLFGGAGVGK            | 106 | 18068 | 1.05 | 0.08 | 8   |
| 1 C34E10.6             | IGLFGGAGVGK            | 120 | 12759 | 1.07 | 0.10 | 9   |
| 10 C34E10.6            | IGLFGGAGVGK            | 100 | 20733 | 1.08 | 0.03 | 3   |
| 1 C34E10.6             | IGLFGGAGVGK            | 78  | 4269  | 1.09 | 0.07 | 6   |
| 7 C34E10.6             | IGLFGGAGVGK            | 97  | 5022  | 1.21 | 0.15 | 12  |
| 10 C34E10.6            | IGLFGGAGVGK            | 105 | 23231 | 1.22 | 0.11 | 9   |
| 1 C34E10.6             | VVDLLAPYAK             | 13  | 2695  | 1.24 | 0.09 | 7   |
| 22 C34E10.6            | VVDLLAPYAK             | 17  | 3388  | 1.28 | 0.11 | 9   |
| 10 C34E10.6            | IGLFGGAGVGK            | 101 | 24341 | 1.31 | 0.04 | 3   |
| 7 C34E10.6             | IGLFGGAGVGK            | 84  | 4380  | 1.32 | 0.15 | 12  |
| 10 C34E10.6            | VVDLLAPYAK             | 42  | 4582  | 1.36 | 0.06 | 5   |
| 22 C34E10.6            | VVDLLAPYAK             | 12  | 3555  | 1.39 | 0.05 | 4   |
| 7 C34E10.6             | IGLFGGAGVGK            | 84  | 3172  | 1.50 | 0.23 | 15  |
| 22 C34E10.6            | VVDLLAPYAK             | 24  | 3371  | 1.50 | 0.07 | 5   |
| 7 C34E10.6             | TVLIMELINNVAK          | 51  | 1499  | 1.56 | 0.14 | 9   |
| 7 C34E10.6             | IGLFGGAGVGK            | 50  | 2607  | 1.58 | 0.22 | 14  |
| 22 C34E10.6            | VVDLLAPYAK             | 14  | 4207  | 1.64 | 0.14 | 8   |
| 10 C34E10.6            | VVDLLAPYAK             | 16  | 3494  | 1.70 | 0.07 | 4   |
| 22 C34E10.6            | IGLFGGAGVGK            | 50  | 1460  | 1.77 | 0.43 | 24  |
| 10 C34E10.6            | VVDLLAPYAK             | 12  | 2379  | 2.04 | 0.11 | 6   |
| 7 C34E10.6             | IGLFGGAGVGK            | 46  | 4373  | 5.54 | 0.26 | 5   |
| 7 C34E10.6             | IGLFGGAGVGK            | 43  | 3179  | 7.14 | 0.31 | 4   |
| 10 C34E7.4             | TLNTILHDSK             | 11  | 4412  | 1.49 | 0.14 | 9   |
| 10 C34F11.3b           | YNPVGESTLREIFIK        | 36  | 1291  | 0.47 | 0.17 | 37  |
| 10 C34F11.3b           | YNPVGESTLREIFIK        | 16  | 929   | 0.73 | 0.20 | 27  |
| 10 C34F11.3b           | VDTHIHAASSMNQK         | 11  | 3497  | 0.83 | 0.20 | 24  |
| 7 C34F11.3b            | YNPVGESTLREIFIK        | 29  | 914   | 0.89 | 0.19 | 21  |
| 10 C34F11.3b           | VDTHIHAASSMNQK         | 32  | 4706  | 0.98 | 0.27 | 28  |
| 1 C34F11.3b;C34F11.3a  | LTAMIVDGPLK            | 12  | 510   | 0.67 | 0.07 | 11  |
| 22 C34F11.3b;C34F11.3a | YNPVGESTLREIFIK        | 13  | 646   | 1.10 | 0.14 | 13  |
| 1 C34G6.1              | SSGIFGFIK              | 17  | 1122  | 1.42 | 0.14 | 10  |
| 22 C34G6.6a;C34G6.6b   | AIRTINAALPEGESELHVLK   | 12  | 4126  | 0.93 | 0.14 | 15  |
| 7 C35C5.1              | FQLTLK                 | 12  | 3764  | 6.68 | 0.37 | 6   |
| 22 C35D10.6            | REDIWITSK              | 13  | 1066  | 1.82 | 0.42 | 23  |
| 10 C36A4.4             | LWLERVQAK              | 18  | 787   | 0.36 | 0.21 | 59  |
| 22 C36A4.4             | LWLERVQAK              | 18  | 543   | 0.42 | 0.34 | 80  |
| 22 C36A4.4             | IALLQALAGEREHQNP GK    | 18  | 4942  | 1.24 | 0.12 | 10  |
| 22 C36A4.4             | IALLQALAGEREHQNP GK    | 38  | 3248  | 1.31 | 0.14 | 11  |
| 22 C36A4.5             | YPAHIYQSAAK            | 16  | 3319  | 1.55 | 0.11 | 7   |
| 22 C36A4.9a;C36A4.9b   | VAEAAVVAAPHDIK         | 32  | 5126  | 0.48 | 0.16 | 33  |
| 10 C36A4.9a;C36A4.9b   | VAEAAVVAAPHDIK         | 31  | 5410  | 0.53 | 0.24 | 45  |
| 22 C36A4.9a;C36A4.9b   | SIADAAAVLASQEDVK       | 61  | 1352  | 0.80 | 0.12 | 15  |
| 10 C36A4.9a;C36A4.9b   | SIADAAAVLASQEDVK       | 70  | 1430  | 0.84 | 0.13 | 16  |
| 10 C36A4.9a;C36A4.9b   | IGALAVPDVIQEAPGLPK     | 12  | 1236  | 0.86 | 0.26 | 30  |
| 10 C36A4.9a;C36A4.9b   | VAEAAVVAAPHDIK         | 33  | 5515  | 0.88 | 0.25 | 28  |
| 10 C36A4.9a;C36A4.9b   | SIADAAAVLASQEDVK       | 67  | 1485  | 0.97 | 0.17 | 18  |
| 22 C36A4.9a;C36A4.9b   | RVTKPDGVELPK           | 24  | 6560  | 1.02 | 0.19 | 19  |
| 22 C36A4.9a;C36A4.9b   | RVTKPDGVELPK           | 22  | 2901  | 1.44 | 0.15 | 11  |
| 22 C36A4.9a;C36A4.9b   | RVTKPDGVELPK           | 25  | 3779  | 1.58 | 0.15 | 10  |
| 22 C36A4.9a;C36A4.9b   | RVTKPDGVELPK           | 16  | 6552  | 2.61 | 0.30 | 12  |
| 10 C36B1.4             | VNDELQQRVLSTEEIEALLK   | 36  | 4787  | 0.40 | 0.12 | 31  |
| 10 C36B1.4             | VNDELQQRVLSTEEIEALLK   | 44  | 5046  | 0.50 | 0.25 | 49  |
| 7 C36B1.4              | VVETERVAAEAEAAASK      | 56  | 2422  | 0.63 | 0.18 | 29  |
| 10 C36B1.4             | VVETERVAAEAEAAASK      | 63  | 6190  | 0.73 | 0.12 | 16  |
| 1 C36B1.4              | SIPALQDDRTIRK          | 13  | 38878 | 0.74 | 0.15 | 20  |
| 22 C36B1.4             | VVETERVAAEAEAAASK      | 46  | 4004  | 1.13 | 0.08 | 7   |
| 7 C36B1.4              | VVETERVAAEAEAAASK      | 26  | 3433  | 1.25 | 0.21 | 17  |
| 1 C36B1.4              | VVETERVAAEAEAAASK      | 14  | 1687  | 1.26 | 0.28 | 22  |
| 7 C36B1.4              | VVETERVAAEAEAAASK      | 14  | 4354  | 1.28 | 0.19 | 15  |
| 1 C36B1.4              | SLAQVVPFGSQNIEIAVMK    | 12  | 2263  | 1.42 | 0.16 | 11  |
| 22 C36B1.4             | VVETERVAAEAEAAASK      | 17  | 1837  | 1.60 | 0.22 | 14  |
| 1 C36B1.4              | VVETERVAAEAEAAASK      | 12  | 1245  | 1.66 | 0.09 | 5   |
| 1 C36B1.4              | VVETERVAAEAEAAASK      | 55  | 2609  | 1.74 | 0.09 | 5   |
| 22 C36B1.4             | SIPALQDDRTIRK          | 11  | 21318 | 2.27 | 0.19 | 8   |
| 22 C36B1.4             | VVETERVAAEAEAAASK      | 23  | 1373  | 2.50 | 0.19 | 8   |
| 7 C36B1.7              | NFEADVHLK              | 29  | 4917  | 0.73 | 0.12 | 17  |
| 7 C36B1.7              | NFEADVHLK              | 22  | 4375  | 0.82 | 0.05 | 6   |
| 10 C36E8.5             | MAATFVGNSTAIQELFK      | 103 | 2862  | 0.16 | 0.25 | 156 |
| 22 C36E8.5             | NSSYFVEWIPNNVK         | 36  | 2325  | 0.19 | 0.08 | 44  |
| 10 C36E8.5             | NSSYFVEWIPNNVK         | 29  | 2189  | 0.20 | 0.18 | 92  |
| 10 C36E8.5             | NSSYFVEWIPNNVK         | 33  | 2849  | 0.20 | 0.20 | 98  |
| 22 C36E8.5             | NSSYFVEWIPNNVK         | 29  | 2637  | 0.20 | 0.18 | 86  |
| 10 C36E8.5             | MAATFVGNSTAIQELFK      | 91  | 3540  | 0.23 | 0.26 | 116 |
| 10 C36E8.5             | NSSYFVEWIPNNVK         | 25  | 3076  | 0.24 | 0.13 | 57  |
| 10 C36E8.5             | MAATFVGNSTAIQELFK      | 95  | 2676  | 0.27 | 0.22 | 82  |
| 10 C36E8.5             | IREEYPDRIMSSFSVVPSPK   | 14  | 37861 | 0.28 | 0.09 | 33  |
| 10 C36E8.5             | GTQAYRALTV AELTQQMFDAK | 51  | 6017  | 0.31 | 0.11 | 36  |
| 10 C36E8.5             | NSSYFVEWIPNNVK         | 31  | 2828  | 0.31 | 0.14 | 44  |
| 10 C36E8.5             | MAATFVGNSTAIQELFK      | 83  | 2527  | 0.33 | 0.30 | 91  |
| 10 C36E8.5             | NSSYFVEWIPNNVK         | 30  | 2312  | 0.33 | 0.19 | 56  |
| 10 C36E8.5             | NSSYFVEWIPNNVK         | 45  | 7084  | 0.35 | 0.12 | 35  |
| 10 C36E8.5             | GTQAYRALTV AELTQQMFDAK | 48  | 5764  | 0.35 | 0.30 | 85  |
| 10 C36E8.5             | MAATFVGNSTAIQELFK      | 69  | 1453  | 0.38 | 0.27 | 73  |
| 7 C36E8.5              | MAATFVGNSTAIQELFK      | 99  | 1028  | 0.38 | 0.29 | 75  |
| 10 C36E8.5             | NSSYFVEWIPNNVK         | 27  | 2453  | 0.39 | 0.15 | 40  |
| 10 C36E8.5             | RISEQFTAMFRRK          | 13  | 7450  | 0.42 | 0.30 | 73  |
| 10 C36E8.5             | NSSYFVEWIPNNVK         | 45  | 2473  | 0.43 | 0.14 | 32  |
| 10 C36E8.5             | RISEQFTAMFRRK          | 21  | 6522  | 0.43 | 0.31 | 74  |
| 10 C36E8.5             | MAATFVGNSTAIQELFK      | 80  | 1396  | 0.43 | 0.28 | 64  |
| 7 C36E8.5              | GHYTEGAELVDNVDVIRK     | 29  | 2882  | 0.44 | 0.17 | 38  |
| 22 C36E8.5             | NSSYFVEWIPNNVK         | 24  | 3642  | 0.45 | 0.09 | 19  |
| 22 C36E8.5             | MAATFVGNSTAIQELFK      | 33  | 1458  | 0.48 | 0.15 | 31  |
| 22 C36E8.5             | GHYTEGAELVDNVDVIRK     | 43  | 9832  | 0.49 | 0.26 | 53  |
| 10 C36E8.5             | GTQAYRALTV AELTQQMFDAK | 26  | 1744  | 0.49 | 0.14 | 29  |
| 10 C36E8.5             | MAATFVGNSTAIQELFK      | 54  | 909   | 0.50 | 0.20 | 40  |
| 22 C36E8.5             | NSSYFVEWIPNNVK         | 36  | 3314  | 0.50 | 0.20 | 41  |

|            |                       |     |       |      |      |    |
|------------|-----------------------|-----|-------|------|------|----|
| 7 C36E8.5  | MAATFVGNSTAIQELFK     | 31  | 496   | 0.51 | 0.14 | 28 |
| 22 C36E8.5 | MREIVHVQAGQCGNQIGSK   | 49  | 7537  | 0.51 | 0.09 | 18 |
| 10 C36E8.5 | RISEQFTAMFRRK         | 13  | 10789 | 0.52 | 0.15 | 29 |
| 22 C36E8.5 | GHYTEGAELVDNVLDVIRK   | 26  | 3716  | 0.52 | 0.19 | 37 |
| 22 C36E8.5 | GTQAYRALTVaelTQQMFDAK | 56  | 4155  | 0.53 | 0.13 | 24 |
| 22 C36E8.5 | GHYTEGAELVDNVLDVIRK   | 16  | 5418  | 0.54 | 0.39 | 71 |
| 10 C36E8.5 | RISEQFTAMFRRK         | 22  | 5106  | 0.57 | 0.22 | 38 |
| 1 C36E8.5  | MAATFVGNSTAIQELFK     | 70  | 654   | 0.58 | 0.23 | 40 |
| 10 C36E8.5 | FWEVISDEHGIQPDGTFK    | 21  | 1873  | 0.58 | 0.39 | 67 |
| 22 C36E8.5 | MREIVHVQAGQCGNQIGSK   | 31  | 9742  | 0.59 | 0.09 | 15 |
| 22 C36E8.5 | GHYTEGAELVDNVLDVIRK   | 43  | 3636  | 0.60 | 0.23 | 38 |
| 22 C36E8.5 | GTQAYRALTVaelTQQMFDAK | 47  | 3373  | 0.60 | 0.14 | 23 |
| 22 C36E8.5 | MAATFVGNSTAIQELFK     | 98  | 2479  | 0.61 | 0.21 | 35 |
| 10 C36E8.5 | MAATFVGNSTAIQELFK     | 100 | 1662  | 0.62 | 0.19 | 31 |
| 22 C36E8.5 | GTQAYRALTVaelTQQMFDAK | 48  | 3818  | 0.62 | 0.14 | 22 |
| 10 C36E8.5 | GHYTEGAELVDNVLDVIRK   | 26  | 6612  | 0.66 | 0.20 | 30 |
| 10 C36E8.5 | NSSYFVEWIPNNVK        | 48  | 1716  | 0.66 | 0.28 | 42 |
| 22 C36E8.5 | MAATFVGNSTAIQELFK     | 55  | 1157  | 0.67 | 0.12 | 17 |
| 10 C36E8.5 | GHYTEGAELVDNVLDVIRK   | 22  | 3950  | 0.70 | 0.16 | 23 |
| 7 C36E8.5  | MAATFVGNSTAIQELFK     | 93  | 1142  | 0.70 | 0.17 | 24 |
| 22 C36E8.5 | MAATFVGNSTAIQELFK     | 35  | 1653  | 0.71 | 0.16 | 22 |
| 22 C36E8.5 | MAATFVGNSTAIQELFK     | 61  | 719   | 0.72 | 0.26 | 36 |
| 10 C36E8.5 | FWEVISDEHGIQPDGTFK    | 44  | 4761  | 0.72 | 0.13 | 18 |
| 10 C36E8.5 | GTQAYRALTVaelTQQMFDAK | 31  | 1662  | 0.72 | 0.23 | 32 |
| 22 C36E8.5 | NSSYFVEWIPNNVK        | 40  | 6111  | 0.74 | 0.13 | 18 |
| 22 C36E8.5 | GTQAYRALTVaelTQQMFDAK | 48  | 3359  | 0.74 | 0.14 | 19 |
| 22 C36E8.5 | MAATFVGNSTAIQELFK     | 106 | 2682  | 0.74 | 0.23 | 31 |
| 7 C36E8.5  | MAATFVGNSTAIQELFK     | 83  | 993   | 0.75 | 0.23 | 31 |
| 22 C36E8.5 | GTQAYRALTVaelTQQMFDAK | 19  | 2394  | 0.75 | 0.19 | 25 |
| 10 C36E8.5 | GTQAYRALTVaelTQQMFDAK | 41  | 2000  | 0.75 | 0.22 | 30 |
| 22 C36E8.5 | NSSYFVEWIPNNVK        | 52  | 7867  | 0.76 | 0.15 | 19 |
| 22 C36E8.5 | GHYTEGAELVDNVLDVIRK   | 24  | 3418  | 0.76 | 0.11 | 14 |
| 22 C36E8.5 | MAATFVGNSTAIQELFK     | 77  | 1582  | 0.76 | 0.11 | 15 |
| 10 C36E8.5 | GHYTEGAELVDNVLDVIRK   | 15  | 5139  | 0.77 | 0.14 | 19 |
| 10 C36E8.5 | NSSYFVEWIPNNVK        | 23  | 3347  | 0.78 | 0.07 | 9  |
| 22 C36E8.5 | GTQAYRALTVaelTQQMFDAK | 36  | 1591  | 0.79 | 0.22 | 28 |
| 22 C36E8.5 | MAATFVGNSTAIQELFK     | 89  | 2582  | 0.79 | 0.25 | 32 |
| 22 C36E8.5 | FWEVISDEHGIQPDGTFK    | 30  | 2138  | 0.80 | 0.10 | 12 |
| 10 C36E8.5 | GHYTEGAELVDNVLDVIRK   | 14  | 3142  | 0.80 | 0.17 | 22 |
| 7 C36E8.5  | NSSYFVEWIPNNVK        | 16  | 1537  | 0.80 | 0.14 | 18 |
| 7 C36E8.5  | MAATFVGNSTAIQELFK     | 50  | 687   | 0.81 | 0.24 | 30 |
| 22 C36E8.5 | GHYTEGAELVDNVLDVIRK   | 19  | 3520  | 0.81 | 0.27 | 33 |
| 22 C36E8.5 | MAATFVGNSTAIQELFK     | 91  | 1243  | 0.83 | 0.19 | 22 |
| 22 C36E8.5 | GHYTEGAELVDNVLDVIRK   | 38  | 2527  | 0.83 | 0.32 | 39 |
| 1 C36E8.5  | MREIVHVQAGQCGNQIGSK   | 13  | 667   | 0.86 | 0.16 | 19 |
| 7 C36E8.5  | NSSYFVEWIPNNVK        | 58  | 5217  | 0.86 | 0.11 | 13 |
| 22 C36E8.5 | FWEVISDEHGIQPDGTFK    | 38  | 2537  | 0.87 | 0.09 | 11 |
| 22 C36E8.5 | MAATFVGNSTAIQELFK     | 131 | 3475  | 0.87 | 0.13 | 15 |
| 1 C36E8.5  | MAATFVGNSTAIQELFK     | 71  | 650   | 0.88 | 0.20 | 23 |
| 22 C36E8.5 | MAATFVGNSTAIQELFK     | 102 | 3041  | 0.88 | 0.23 | 26 |
| 7 C36E8.5  | NSSYFVEWIPNNVK        | 53  | 4987  | 0.89 | 0.13 | 15 |
| 7 C36E8.5  | MAATFVGNSTAIQELFK     | 67  | 839   | 0.89 | 0.07 | 8  |
| 7 C36E8.5  | NSSYFVEWIPNNVK        | 36  | 2125  | 0.89 | 0.16 | 18 |
| 10 C36E8.5 | IREEYPDRIMSSFSVVPSPK  | 12  | 52089 | 0.92 | 0.14 | 16 |
| 7 C36E8.5  | MAATFVGNSTAIQELFK     | 25  | 1187  | 0.92 | 0.20 | 22 |
| 7 C36E8.5  | NSSYFVEWIPNNVK        | 51  | 2416  | 0.92 | 0.16 | 18 |
| 22 C36E8.5 | MAATFVGNSTAIQELFK     | 108 | 3066  | 0.93 | 0.26 | 28 |
| 22 C36E8.5 | MAATFVGNSTAIQELFK     | 22  | 1472  | 0.94 | 0.13 | 13 |
| 22 C36E8.5 | MAATFVGNSTAIQELFK     | 119 | 2859  | 0.94 | 0.21 | 23 |
| 10 C36E8.5 | NSSYFVEWIPNNVK        | 46  | 2888  | 0.95 | 0.17 | 18 |
| 7 C36E8.5  | NSSYFVEWIPNNVK        | 57  | 2167  | 0.95 | 0.21 | 22 |
| 10 C36E8.5 | RISEQFTAMFRRK         | 12  | 6595  | 0.95 | 0.25 | 26 |
| 22 C36E8.5 | GTQAYRALTVaelTQQMFDAK | 59  | 3576  | 0.95 | 0.10 | 10 |
| 7 C36E8.5  | NSSYFVEWIPNNVK        | 65  | 10132 | 0.96 | 0.10 | 10 |
| 10 C36E8.5 | NSSYFVEWIPNNVK        | 50  | 2510  | 0.96 | 0.18 | 19 |
| 10 C36E8.5 | FWEVISDEHGIQPDGTFK    | 60  | 1378  | 0.96 | 0.08 | 9  |
| 1 C36E8.5  | GHYTEGAELVDNVLDVIRK   | 21  | 984   | 0.96 | 0.38 | 39 |
| 10 C36E8.5 | MAATFVGNSTAIQELFK     | 84  | 1022  | 0.97 | 0.15 | 15 |
| 10 C36E8.5 | MAATFVGNSTAIQELFK     | 94  | 842   | 0.97 | 0.13 | 13 |
| 1 C36E8.5  | MAATFVGNSTAIQELFK     | 50  | 540   | 0.97 | 0.15 | 15 |
| 1 C36E8.5  | MAATFVGNSTAIQELFK     | 14  | 853   | 0.97 | 0.29 | 29 |
| 22 C36E8.5 | MAATFVGNSTAIQELFK     | 58  | 1015  | 0.97 | 0.14 | 14 |
| 1 C36E8.5  | NSSYFVEWIPNNVK        | 25  | 1078  | 0.98 | 0.18 | 18 |
| 7 C36E8.5  | NSSYFVEWIPNNVK        | 47  | 6374  | 0.98 | 0.14 | 14 |
| 10 C36E8.5 | MAATFVGNSTAIQELFK     | 37  | 2584  | 0.99 | 0.19 | 19 |
| 10 C36E8.5 | GHYTEGAELVDNVLDVIRK   | 28  | 11721 | 0.99 | 0.23 | 23 |
| 10 C36E8.5 | MAATFVGNSTAIQELFK     | 96  | 1927  | 0.99 | 0.22 | 22 |
| 22 C36E8.5 | GHYTEGAELVDNVLDVIRK   | 29  | 7945  | 1.01 | 0.19 | 18 |
| 10 C36E8.5 | MAATFVGNSTAIQELFK     | 88  | 1669  | 1.01 | 0.12 | 12 |
| 10 C36E8.5 | GTQAYRALTVaelTQQMFDAK | 43  | 2543  | 1.01 | 0.16 | 16 |
| 10 C36E8.5 | GTQAYRALTVaelTQQMFDAK | 20  | 3205  | 1.04 | 0.13 | 12 |
| 22 C36E8.5 | GHYTEGAELVDNVLDVIRK   | 20  | 4623  | 1.05 | 0.17 | 16 |
| 22 C36E8.5 | MREIVHVQAGQCGNQIGSK   | 29  | 15713 | 1.07 | 0.16 | 15 |
| 7 C36E8.5  | GHYTEGAELVDNVLDVIRK   | 23  | 3485  | 1.08 | 0.22 | 20 |
| 22 C36E8.5 | NSSYFVEWIPNNVK        | 48  | 3321  | 1.08 | 0.11 | 10 |
| 1 C36E8.5  | MAATFVGNSTAIQELFK     | 69  | 762   | 1.09 | 0.18 | 16 |
| 10 C36E8.5 | GHYTEGAELVDNVLDVIRK   | 21  | 4889  | 1.10 | 0.28 | 26 |
| 10 C36E8.5 | NSSYFVEWIPNNVK        | 19  | 2145  | 1.10 | 0.07 | 6  |
| 22 C36E8.5 | RISEQFTAMFRRK         | 10  | 2313  | 1.11 | 0.22 | 20 |
| 1 C36E8.5  | GTQAYRALTVaelTQQMFDAK | 23  | 696   | 1.12 | 0.19 | 17 |
| 22 C36E8.5 | MAATFVGNSTAIQELFK     | 96  | 1368  | 1.12 | 0.19 | 17 |
| 22 C36E8.5 | GHYTEGAELVDNVLDVIRK   | 32  | 4785  | 1.13 | 0.09 | 8  |
| 22 C36E8.5 | GTQAYRALTVaelTQQMFDAK | 18  | 2660  | 1.14 | 0.09 | 8  |
| 10 C36E8.5 | GTQAYRALTVaelTQQMFDAK | 34  | 1310  | 1.14 | 0.11 | 10 |
| 1 C36E8.5  | MREIVHVQAGQCGNQIGSK   | 60  | 7576  | 1.14 | 0.11 | 9  |
| 10 C36E8.5 | GTQAYRALTVaelTQQMFDAK | 17  | 1180  | 1.16 | 0.06 | 5  |
| 1 C36E8.5  | NSSYFVEWIPNNVK        | 48  | 955   | 1.18 | 0.14 | 12 |
| 7 C36E8.5  | GTQAYRALTVaelTQQMFDAK | 25  | 2201  | 1.20 | 0.16 | 13 |
| 10 C36E8.5 | MAATFVGNSTAIQELFK     | 72  | 1914  | 1.21 | 0.14 | 12 |
| 10 C36E8.5 | GTQAYRALTVaelTQQMFDAK | 14  | 2300  | 1.22 | 0.09 | 8  |
| 22 C36E8.5 | IREEYPDRIMSSFSVVPSPK  | 14  | 45131 | 1.22 | 0.14 | 12 |

|            |                       |     |       |      |      |    |
|------------|-----------------------|-----|-------|------|------|----|
| 22 C36E8.5 | NSSYFVEWIPNNVK        | 15  | 1416  | 1.23 | 0.10 | 8  |
| 10 C36E8.5 | GTQAYRALTVAELTQQMFDAK | 16  | 1042  | 1.25 | 0.33 | 27 |
| 10 C36E8.5 | FWEVISDEHGIQPDGTFK    | 38  | 3593  | 1.25 | 0.17 | 13 |
| 7 C36E8.5  | MAATFVGNSTAIQELFK     | 91  | 1686  | 1.25 | 0.18 | 14 |
| 1 C36E8.5  | MREIVHVQAGQCGNQIGSK   | 57  | 6747  | 1.26 | 0.12 | 9  |
| 7 C36E8.5  | GTQAYRALTVAELTQQMFDAK | 29  | 3271  | 1.29 | 0.10 | 8  |
| 7 C36E8.5  | NSSYFVEWIPNNVK        | 33  | 2368  | 1.29 | 0.09 | 7  |
| 7 C36E8.5  | MAATFVGNSTAIQELFK     | 52  | 681   | 1.30 | 0.09 | 7  |
| 10 C36E8.5 | NSSYFVEWIPNNVK        | 13  | 1823  | 1.30 | 0.12 | 9  |
| 22 C36E8.5 | RISEQFTAMFRRK         | 12  | 5278  | 1.31 | 0.14 | 11 |
| 22 C36E8.5 | GTQAYRALTVAELTQQMFDAK | 26  | 2221  | 1.31 | 0.28 | 21 |
| 7 C36E8.5  | GHYTEGAELVDNVLDVIRK   | 21  | 2280  | 1.32 | 0.12 | 9  |
| 10 C36E8.5 | MAATFVGNSTAIQELFK     | 124 | 2061  | 1.32 | 0.15 | 11 |
| 10 C36E8.5 | GHYTEGAELVDNVLDVIRK   | 32  | 4030  | 1.33 | 0.12 | 9  |
| 22 C36E8.5 | MAATFVGNSTAIQELFK     | 65  | 1063  | 1.33 | 0.11 | 8  |
| 10 C36E8.5 | MAATFVGNSTAIQELFK     | 92  | 910   | 1.35 | 0.18 | 13 |
| 10 C36E8.5 | MAATFVGNSTAIQELFK     | 54  | 1843  | 1.36 | 0.21 | 15 |
| 22 C36E8.5 | IREEYPDRIMSSFSVVPSPK  | 15  | 23532 | 1.39 | 0.09 | 6  |
| 10 C36E8.5 | NSSYFVEWIPNNVK        | 27  | 1494  | 1.40 | 0.12 | 9  |
| 7 C36E8.5  | NSSYFVEWIPNNVK        | 18  | 3446  | 1.42 | 0.17 | 12 |
| 10 C36E8.5 | MAATFVGNSTAIQELFK     | 64  | 1144  | 1.43 | 0.17 | 12 |
| 22 C36E8.5 | MAATFVGNSTAIQELFK     | 97  | 1840  | 1.43 | 0.12 | 9  |
| 22 C36E8.5 | MAATFVGNSTAIQELFK     | 23  | 798   | 1.44 | 0.05 | 4  |
| 1 C36E8.5  | MAATFVGNSTAIQELFK     | 26  | 899   | 1.44 | 0.20 | 14 |
| 22 C36E8.5 | MAATFVGNSTAIQELFK     | 46  | 1893  | 1.44 | 0.09 | 6  |
| 10 C36E8.5 | MAATFVGNSTAIQELFK     | 101 | 1748  | 1.44 | 0.22 | 15 |
| 22 C36E8.5 | MAATFVGNSTAIQELFK     | 91  | 1471  | 1.45 | 0.18 | 12 |
| 7 C36E8.5  | MAATFVGNSTAIQELFK     | 60  | 1113  | 1.45 | 0.15 | 10 |
| 10 C36E8.5 | GTQAYRALTVAELTQQMFDAK | 21  | 1308  | 1.45 | 0.22 | 15 |
| 7 C36E8.5  | MAATFVGNSTAIQELFK     | 45  | 2307  | 1.45 | 0.21 | 15 |
| 22 C36E8.5 | RISEQFTAMFRRK         | 14  | 5279  | 1.46 | 0.09 | 6  |
| 1 C36E8.5  | MAATFVGNSTAIQELFK     | 56  | 544   | 1.46 | 0.18 | 12 |
| 22 C36E8.5 | MAATFVGNSTAIQELFK     | 101 | 1412  | 1.49 | 0.22 | 14 |
| 7 C36E8.5  | MAATFVGNSTAIQELFK     | 100 | 1644  | 1.50 | 0.17 | 11 |
| 10 C36E8.5 | GTQAYRALTVAELTQQMFDAK | 41  | 1453  | 1.51 | 0.13 | 8  |
| 22 C36E8.5 | NSSYFVEWIPNNVK        | 30  | 2963  | 1.51 | 0.11 | 8  |
| 22 C36E8.5 | MAATFVGNSTAIQELFK     | 74  | 1180  | 1.52 | 0.17 | 11 |
| 22 C36E8.5 | MREIVHVQAGQCGNQIGSK   | 59  | 13163 | 1.53 | 0.09 | 6  |
| 7 C36E8.5  | MAATFVGNSTAIQELFK     | 146 | 3972  | 1.54 | 0.17 | 11 |
| 22 C36E8.5 | RISEQFTAMFRRK         | 12  | 1605  | 1.55 | 0.29 | 19 |
| 10 C36E8.5 | MAATFVGNSTAIQELFK     | 95  | 1253  | 1.58 | 0.18 | 11 |
| 22 C36E8.5 | MAATFVGNSTAIQELFK     | 99  | 1748  | 1.58 | 0.11 | 7  |
| 22 C36E8.5 | MREIVHVQAGQCGNQIGSK   | 39  | 7537  | 1.59 | 0.12 | 8  |
| 22 C36E8.5 | GHYTEGAELVDNVLDVIRK   | 40  | 8274  | 1.59 | 0.08 | 5  |
| 10 C36E8.5 | GTQAYRALTVAELTQQMFDAK | 40  | 1888  | 1.61 | 0.11 | 7  |
| 7 C36E8.5  | GTQAYRALTVAELTQQMFDAK | 19  | 2516  | 1.61 | 0.22 | 13 |
| 10 C36E8.5 | GTQAYRALTVAELTQQMFDAK | 36  | 3291  | 1.61 | 0.16 | 10 |
| 7 C36E8.5  | GTQAYRALTVAELTQQMFDAK | 64  | 2511  | 1.61 | 0.20 | 12 |
| 7 C36E8.5  | MAATFVGNSTAIQELFK     | 89  | 2499  | 1.61 | 0.22 | 14 |
| 22 C36E8.5 | GTQAYRALTVAELTQQMFDAK | 15  | 2140  | 1.62 | 0.13 | 8  |
| 1 C36E8.5  | IREEYPDRIMSSFSVVPSPK  | 17  | 3273  | 1.66 | 0.17 | 11 |
| 10 C36E8.5 | FWEVISDEHGIQPDGTFK    | 24  | 1940  | 1.69 | 0.16 | 10 |
| 10 C36E8.5 | MAATFVGNSTAIQELFK     | 93  | 1671  | 1.70 | 0.17 | 10 |
| 10 C36E8.5 | GTQAYRALTVAELTQQMFDAK | 52  | 3123  | 1.71 | 0.20 | 12 |
| 7 C36E8.5  | MREIVHVQAGQCGNQIGSK   | 23  | 1562  | 1.71 | 0.24 | 14 |
| 22 C36E8.5 | GTQAYRALTVAELTQQMFDAK | 48  | 2828  | 1.72 | 0.11 | 6  |
| 10 C36E8.5 | FWEVISDEHGIQPDGTFK    | 44  | 1191  | 1.75 | 0.18 | 10 |
| 10 C36E8.5 | NSSYFVEWIPNNVK        | 44  | 4480  | 1.76 | 0.13 | 8  |
| 7 C36E8.5  | MAATFVGNSTAIQELFK     | 62  | 928   | 1.76 | 0.12 | 7  |
| 22 C36E8.5 | GTQAYRALTVAELTQQMFDAK | 54  | 3187  | 1.77 | 0.23 | 13 |
| 7 C36E8.5  | MAATFVGNSTAIQELFK     | 139 | 3317  | 1.79 | 0.15 | 8  |
| 1 C36E8.5  | NSSYFVEWIPNNVK        | 12  | 532   | 1.82 | 0.32 | 17 |
| 7 C36E8.5  | MREIVHVQAGQCGNQIGSK   | 50  | 6948  | 1.83 | 0.08 | 5  |
| 7 C36E8.5  | GTQAYRALTVAELTQQMFDAK | 55  | 2101  | 1.85 | 0.21 | 11 |
| 22 C36E8.5 | GHYTEGAELVDNVLDVIRK   | 32  | 3819  | 1.85 | 0.16 | 8  |
| 10 C36E8.5 | NSSYFVEWIPNNVK        | 33  | 1398  | 1.86 | 0.14 | 7  |
| 7 C36E8.5  | MAATFVGNSTAIQELFK     | 15  | 1529  | 1.86 | 0.31 | 17 |
| 10 C36E8.5 | NSSYFVEWIPNNVK        | 60  | 3918  | 1.89 | 0.08 | 4  |
| 10 C36E8.5 | MAATFVGNSTAIQELFK     | 25  | 1492  | 1.89 | 0.10 | 5  |
| 1 C36E8.5  | MREIVHVQAGQCGNQIGSK   | 52  | 12020 | 1.95 | 0.21 | 11 |
| 7 C36E8.5  | MREIVHVQAGQCGNQIGSK   | 41  | 7424  | 1.96 | 0.16 | 8  |
| 10 C36E8.5 | MAATFVGNSTAIQELFK     | 85  | 1591  | 1.97 | 0.20 | 10 |
| 10 C36E8.5 | NSSYFVEWIPNNVK        | 57  | 2821  | 1.98 | 0.18 | 9  |
| 7 C36E8.5  | GHYTEGAELVDNVLDVIRK   | 22  | 3144  | 1.99 | 0.13 | 7  |
| 7 C36E8.5  | MAATFVGNSTAIQELFK     | 128 | 3127  | 2.04 | 0.14 | 7  |
| 10 C36E8.5 | GTQAYRALTVAELTQQMFDAK | 34  | 1612  | 2.05 | 0.20 | 10 |
| 1 C36E8.5  | MREIVHVQAGQCGNQIGSK   | 46  | 4653  | 2.05 | 0.17 | 8  |
| 22 C36E8.5 | MREIVHVQAGQCGNQIGSK   | 55  | 6815  | 2.05 | 0.09 | 4  |
| 1 C36E8.5  | MREIVHVQAGQCGNQIGSK   | 41  | 8607  | 2.06 | 0.11 | 6  |
| 10 C36E8.5 | MAATFVGNSTAIQELFK     | 127 | 1156  | 2.07 | 0.19 | 9  |
| 1 C36E8.5  | MREIVHVQAGQCGNQIGSK   | 38  | 6202  | 2.11 | 0.32 | 15 |
| 10 C36E8.5 | MAATFVGNSTAIQELFK     | 58  | 975   | 2.17 | 0.21 | 10 |
| 22 C36E8.5 | RISEQFTAMFRRK         | 17  | 2325  | 2.17 | 0.19 | 9  |
| 10 C36E8.5 | MAATFVGNSTAIQELFK     | 26  | 2009  | 2.30 | 0.16 | 7  |
| 10 C36E8.5 | GTQAYRALTVAELTQQMFDAK | 52  | 3689  | 2.31 | 0.10 | 4  |
| 7 C36E8.5  | MREIVHVQAGQCGNQIGSK   | 38  | 10465 | 2.31 | 0.13 | 6  |
| 22 C36E8.5 | MAATFVGNSTAIQELFK     | 23  | 1199  | 2.35 | 0.21 | 9  |
| 10 C36E8.5 | MAATFVGNSTAIQELFK     | 70  | 1966  | 2.35 | 0.14 | 6  |
| 22 C36E8.5 | GHYTEGAELVDNVLDVIRK   | 30  | 2905  | 2.36 | 0.12 | 5  |
| 22 C36E8.5 | MAATFVGNSTAIQELFK     | 14  | 1182  | 2.43 | 0.16 | 6  |
| 22 C36E8.5 | GHYTEGAELVDNVLDVIRK   | 12  | 2349  | 2.49 | 0.26 | 10 |
| 7 C36E8.5  | MREIVHVQAGQCGNQIGSK   | 45  | 14910 | 2.50 | 0.11 | 4  |
| 1 C36E8.5  | MAATFVGNSTAIQELFK     | 32  | 442   | 2.60 | 0.19 | 7  |
| 10 C36E8.5 | MAATFVGNSTAIQELFK     | 129 | 2806  | 2.66 | 0.15 | 6  |
| 7 C36E8.5  | MREIVHVQAGQCGNQIGSK   | 31  | 4954  | 2.67 | 0.28 | 11 |
| 22 C36E8.5 | GHYTEGAELVDNVLDVIRK   | 34  | 2319  | 2.71 | 0.22 | 8  |
| 1 C36E8.5  | MAATFVGNSTAIQELFK     | 100 | 774   | 2.79 | 0.11 | 4  |
| 1 C36E8.5  | MAATFVGNSTAIQELFK     | 88  | 1060  | 2.83 | 0.29 | 10 |
| 10 C36E8.5 | GTQAYRALTVAELTQQMFDAK | 48  | 3112  | 2.90 | 0.11 | 4  |
| 7 C36E8.5  | MREIVHVQAGQCGNQIGSK   | 21  | 2019  | 2.91 | 0.14 | 5  |
| 1 C36E8.5  | GTQAYRALTVAELTQQMFDAK | 67  | 2816  | 2.98 | 0.26 | 9  |

|                               |                        |    |       |       |      |     |
|-------------------------------|------------------------|----|-------|-------|------|-----|
| 7 C36E8.5                     | GTQAYRALTVVAELTQQMFDAK | 48 | 3322  | 3.18  | 0.22 | 7   |
| 7 C36E8.5                     | GTQAYRALTVVAELTQQMFDAK | 53 | 3346  | 3.36  | 0.16 | 5   |
| 10 C36E8.5                    | MAATFVGNSTAIQELFK      | 99 | 2493  | 3.39  | 0.20 | 6   |
| 1 C36E8.5                     | MAATFVGNSTAIQELFK      | 82 | 831   | 3.59  | 0.23 | 6   |
| 1 C36E8.5                     | GTQAYRALTVVAELTQQMFDAK | 69 | 2580  | 3.80  | 0.14 | 4   |
| 1 C36E8.5                     | NSSYFVEWIPNNVK         | 33 | 1787  | 4.32  | 0.25 | 6   |
| 1 C36E8.5                     | NSSYFVEWIPNNVK         | 45 | 1496  | 4.48  | 0.24 | 5   |
| 7 C36E8.5                     | GHYTEGAELVDNVLDVIRK    | 37 | 3659  | 5.11  | 0.26 | 5   |
| 10 C36E8.5                    | MREIVHVQAGQCGNQIGSK    | 38 | 9132  | 5.27  | 0.09 | 2   |
| 10 C36E8.5                    | MREIVHVQAGQCGNQIGSK    | 50 | 9855  | 5.38  | 0.17 | 3   |
| 10 C36E8.5                    | MREIVHVQAGQCGNQIGSK    | 54 | 8120  | 5.83  | 0.18 | 3   |
| 10 C36E8.5                    | MREIVHVQAGQCGNQIGSK    | 47 | 6328  | 5.99  | 0.10 | 2   |
| 22 C36E8.5                    | MREIVHVQAGQCGNQIGSK    | 12 | 5881  | 7.29  | 0.49 | 7   |
| 7 C36E8.5                     | NSSYFVEWIPNNVK         | 76 | 3638  | 37.03 | 0.25 | 1   |
| 7 C36E8.5                     | NSSYFVEWIPNNVK         | 70 | 3785  | 37.31 | 0.85 | 2   |
| 1 C37C3.6a;C37C3.6c           | DSQGRAYPLEK            | 18 | 4684  | 0.77  | 0.29 | 37  |
| 1 C37C3.6a;C37C3.6c           | DSQGRAYPLEK            | 17 | 4564  | 0.82  | 0.32 | 39  |
| 1 C37C3.6a;C37C3.6c           | FNDEALDGNYPHK          | 22 | 1131  | 1.00  | 0.12 | 12  |
| 1 C37C3.6a;C37C3.6c           | FNDEALDGNYPHK          | 23 | 946   | 1.18  | 0.14 | 11  |
| 1 C37C3.6a;C37C3.6c           | LPEGATNIK              | 22 | 2883  | 1.79  | 0.47 | 26  |
| 1 C37C3.6a;C37C3.6c           | LPEGATNIK              | 22 | 2666  | 3.25  | 0.30 | 9   |
| 10 C37C3.6b;C37C3.6a;C37C3.6c | LLAADACPADEQEK         | 23 | 543   | 0.22  | 0.21 | 96  |
| 22 C37C3.6b;C37C3.6a;C37C3.6c | KPVPEWCDEAVKPSEK       | 16 | 1323  | 0.32  | 0.40 | 127 |
| 10 C37C3.6b;C37C3.6a;C37C3.6c | LLAADACPADEQEK         | 47 | 739   | 0.35  | 0.25 | 70  |
| 10 C37C3.6b;C37C3.6a;C37C3.6c | KPVPEWCDEAVKPSEK       | 24 | 3429  | 0.37  | 0.51 | 136 |
| 22 C37C3.6b;C37C3.6a;C37C3.6c | LLAADACPADEQEK         | 18 | 543   | 0.46  | 0.39 | 85  |
| 10 C37C3.6b;C37C3.6a;C37C3.6c | DSQGRAYPLEK            | 32 | 7956  | 0.49  | 0.23 | 47  |
| 10 C37C3.6b;C37C3.6a;C37C3.6c | STNNLALK               | 61 | 1645  | 0.67  | 0.12 | 18  |
| 22 C37C3.6b;C37C3.6a;C37C3.6c | LPEGATNIK              | 34 | 3723  | 0.73  | 0.23 | 31  |
| 10 C37C3.6b;C37C3.6a;C37C3.6c | FNDEALDGNYPHK          | 35 | 2665  | 0.94  | 0.20 | 21  |
| 7 C37C3.6b;C37C3.6a;C37C3.6c  | FNDEALDGNYPHK          | 49 | 2873  | 0.94  | 0.17 | 18  |
| 10 C37C3.6b;C37C3.6a;C37C3.6c | STNNLALK               | 39 | 1400  | 0.98  | 0.18 | 18  |
| 7 C37C3.6b;C37C3.6a;C37C3.6c  | FNDEALDGNYPHK          | 12 | 1910  | 1.04  | 0.11 | 11  |
| 22 C37C3.6b;C37C3.6a;C37C3.6c | DSQGRAYPLEK            | 21 | 8005  | 1.05  | 0.25 | 24  |
| 10 C37C3.6b;C37C3.6a;C37C3.6c | LPEGATNIK              | 46 | 4591  | 1.07  | 0.21 | 19  |
| 22 C37C3.6b;C37C3.6a;C37C3.6c | DSQGRAYPLEK            | 28 | 11046 | 1.09  | 0.24 | 22  |
| 7 C37C3.6b;C37C3.6a;C37C3.6c  | DSQGRAYPLEK            | 16 | 4985  | 1.09  | 0.23 | 21  |
| 22 C37C3.6b;C37C3.6a;C37C3.6c | LPEGATNIK              | 16 | 3965  | 1.23  | 0.49 | 40  |
| 7 C37C3.6b;C37C3.6a;C37C3.6c  | STNNLALK               | 12 | 918   | 1.40  | 0.17 | 12  |
| 10 C37C3.6b;C37C3.6a;C37C3.6c | STNNLALK               | 20 | 1107  | 1.41  | 0.09 | 7   |
| 22 C37C3.6b;C37C3.6a;C37C3.6c | FNDEALDGNYPHK          | 42 | 2227  | 1.59  | 0.09 | 6   |
| 7 C37C3.6b;C37C3.6a;C37C3.6c  | LPEGATNIK              | 28 | 5693  | 1.65  | 0.22 | 13  |
| 10 C37C3.6b;C37C3.6a;C37C3.6c | LPEGATNIK              | 41 | 5396  | 1.68  | 0.23 | 14  |
| 10 C37C3.6b;C37C3.6a;C37C3.6c | LPEGATNIK              | 21 | 3826  | 1.71  | 0.29 | 17  |
| 22 C37C3.6b;C37C3.6a;C37C3.6c | FNDEALDGNYPHK          | 56 | 1961  | 1.98  | 0.15 | 8   |
| 7 C37E2.1                     | FAFDYATK               | 15 | 1578  | 0.86  | 0.21 | 24  |
| 10 C37E2.1                    | FAFDYATK               | 10 | 971   | 1.08  | 0.12 | 11  |
| 7 C37H5.6a;C37H5.6b           | IIDYLIENHK             | 43 | 2374  | 0.24  | 0.16 | 65  |
| 10 C37H5.6a;C37H5.6b          | IIDYLIENHK             | 27 | 1074  | 0.28  | 0.29 | 105 |
| 22 C37H5.6a;C37H5.6b          | IIDYLIENHK             | 43 | 2328  | 0.30  | 0.30 | 99  |
| 7 C37H5.6a;C37H5.6b           | IIDYLIENHK             | 42 | 1496  | 0.37  | 0.26 | 71  |
| 22 C37H5.6a;C37H5.6b          | LVGDTVGFIEQRNAGK       | 22 | 6380  | 0.38  | 0.32 | 84  |
| 10 C37H5.6a;C37H5.6b          | IIDYLIENHK             | 26 | 977   | 0.42  | 0.10 | 23  |
| 22 C37H5.6a;C37H5.6b          | IIDYLIENHK             | 27 | 1366  | 0.49  | 0.18 | 37  |
| 7 C37H5.6a;C37H5.6b           | IIDYLIENHK             | 56 | 1507  | 0.55  | 0.10 | 18  |
| 1 C37H5.6a;C37H5.6b           | IIDYLIENHK             | 29 | 883   | 0.56  | 0.23 | 41  |
| 22 C37H5.6a;C37H5.6b          | LVGDTVGFIEQRNAGK       | 28 | 6879  | 0.57  | 0.21 | 36  |
| 10 C37H5.6a;C37H5.6b          | IGTTNRGIGPTYSSK        | 12 | 1328  | 0.62  | 0.25 | 40  |
| 1 C37H5.6a;C37H5.6b           | IIDYLIENHK             | 44 | 1055  | 0.63  | 0.17 | 28  |
| 10 C37H5.6a;C37H5.6b          | IGTTNRGIGPTYSSK        | 21 | 1445  | 0.67  | 0.10 | 15  |
| 10 C37H5.6a;C37H5.6b          | IIDYLIENHK             | 44 | 1729  | 0.68  | 0.21 | 31  |
| 1 C37H5.6a;C37H5.6b           | IIDYLIENHK             | 23 | 732   | 0.69  | 0.15 | 22  |
| 10 C37H5.6a;C37H5.6b          | IGTTNRGIGPTYSSK        | 16 | 1626  | 0.78  | 0.15 | 19  |
| 1 C37H5.6a;C37H5.6b           | IIDYLIENHK             | 20 | 737   | 0.94  | 0.14 | 15  |
| 1 C37H5.6a;C37H5.6b           | IIDYLIENHK             | 19 | 489   | 0.99  | 0.21 | 21  |
| 22 C37H5.6a;C37H5.6b          | IIDYLIENHK             | 38 | 4573  | 1.00  | 0.08 | 8   |
| 22 C37H5.6a;C37H5.6b          | IGTTNRGIGPTYSSK        | 20 | 1212  | 1.05  | 0.16 | 16  |
| 22 C37H5.6a;C37H5.6b          | IGTTNRGIGPTYSSK        | 44 | 1432  | 1.09  | 0.07 | 7   |
| 7 C37H5.6a;C37H5.6b           | IGTTNRGIGPTYSSK        | 42 | 1083  | 1.09  | 0.09 | 8   |
| 7 C37H5.6a;C37H5.6b           | IIDYLIENHK             | 61 | 1644  | 1.19  | 0.10 | 9   |
| 22 C37H5.6a;C37H5.6b          | IIDYLIENHK             | 53 | 4169  | 1.19  | 0.13 | 11  |
| 1 C37H5.6a;C37H5.6b           | IIDYLIENHK             | 38 | 1215  | 1.20  | 0.16 | 13  |
| 10 C37H5.6a;C37H5.6b          | IIDYLIENHK             | 63 | 3929  | 1.34  | 0.10 | 8   |
| 22 C37H5.6a;C37H5.6b          | IIDYLIENHK             | 41 | 1182  | 1.48  | 0.14 | 10  |
| 7 C37H5.6a;C37H5.6b           | IGTTNRGIGPTYSSK        | 24 | 1009  | 1.49  | 0.14 | 9   |
| 7 C37H5.6a;C37H5.6b           | IIDYLIENHK             | 50 | 2125  | 1.51  | 0.11 | 8   |
| 7 C37H5.6a;C37H5.6b           | IIDYLIENHK             | 32 | 1672  | 1.55  | 0.10 | 7   |
| 22 C37H5.6a;C37H5.6b          | IIDYLIENHK             | 20 | 907   | 1.93  | 0.12 | 6   |
| 7 C37H5.6a;C37H5.6b           | IIDYLIENHK             | 68 | 2042  | 2.06  | 0.11 | 5   |
| 10 C37H5.8                    | LITRNTTIPTK            | 11 | 2541  | 0.11  | 0.51 | 478 |
| 10 C37H5.8                    | RQAVTNSANTLFBATK       | 78 | 1672  | 0.13  | 0.19 | 152 |
| 10 C37H5.8                    | ALHDAEVK               | 23 | 3447  | 0.13  | 0.25 | 190 |
| 7 C37H5.8                     | ALHDAEVK               | 21 | 2582  | 0.14  | 0.38 | 265 |
| 10 C37H5.8                    | MTEFADQLPK             | 35 | 2745  | 0.19  | 0.24 | 127 |
| 10 C37H5.8                    | RQAVTNSANTLFBATK       | 60 | 2053  | 0.21  | 0.15 | 70  |
| 7 C37H5.8                     | DQIENMIK               | 28 | 808   | 0.22  | 0.20 | 91  |
| 10 C37H5.8                    | EQQIVIQSSGGLSK         | 70 | 3529  | 0.22  | 0.15 | 65  |
| 10 C37H5.8                    | FEQIVGDLIK             | 51 | 2166  | 0.24  | 0.21 | 85  |
| 10 C37H5.8                    | RQAVTNSANTLFBATK       | 63 | 1542  | 0.27  | 0.15 | 57  |
| 7 C37H5.8                     | ALHDAEVK               | 20 | 4446  | 0.29  | 0.56 | 195 |
| 10 C37H5.8                    | FEQIVGDLIK             | 40 | 1514  | 0.30  | 0.25 | 83  |
| 10 C37H5.8                    | MTEFADQLPK             | 21 | 2610  | 0.31  | 0.28 | 91  |
| 22 C37H5.8                    | VQATVQEIFGK            | 48 | 1833  | 0.32  | 0.21 | 65  |
| 10 C37H5.8                    | FEQIVGDLIK             | 55 | 3513  | 0.32  | 0.36 | 110 |
| 10 C37H5.8                    | VYSPSQVGAFVLMK         | 53 | 1569  | 0.33  | 0.50 | 149 |
| 22 C37H5.8                    | FEQIVGDLIK             | 19 | 1161  | 0.38  | 0.27 | 71  |
| 10 C37H5.8                    | LITRNTTIPTK            | 21 | 3836  | 0.39  | 0.13 | 33  |
| 22 C37H5.8                    | FEQIVGDLIK             | 48 | 1709  | 0.39  | 0.12 | 32  |
| 10 C37H5.8                    | DQIENMIK               | 21 | 3126  | 0.39  | 0.16 | 40  |
| 1 C37H5.8                     | ASNGDAWVEAQGK          | 40 | 1430  | 0.39  | 0.09 | 23  |
| 22 C37H5.8                    | EQGVDLTK               | 26 | 9873  | 0.40  | 0.12 | 29  |

|            |                                |    |      |      |      |    |
|------------|--------------------------------|----|------|------|------|----|
| 22 C37H5.8 | FEQIVGDLIK                     | 46 | 2869 | 0.40 | 0.17 | 42 |
| 22 C37H5.8 | SSQIADVLLVGGMSRMPK             | 51 | 1349 | 0.41 | 0.20 | 48 |
| 10 C37H5.8 | FEQIVGDLIK                     | 28 | 1363 | 0.41 | 0.31 | 76 |
| 10 C37H5.8 | RQAVTNSANTLFATK                | 36 | 2332 | 0.41 | 0.25 | 61 |
| 22 C37H5.8 | VQATVQEIFGK                    | 50 | 861  | 0.41 | 0.12 | 30 |
| 1 C37H5.8  | ASNGDAWVEAQGK                  | 37 | 1360 | 0.42 | 0.16 | 38 |
| 22 C37H5.8 | FEQIVGDLIK                     | 40 | 1654 | 0.42 | 0.27 | 64 |
| 22 C37H5.8 | VQATVQEIFGK                    | 47 | 694  | 0.43 | 0.10 | 23 |
| 22 C37H5.8 | VQATVQEIFGK                    | 43 | 667  | 0.44 | 0.12 | 27 |
| 10 C37H5.8 | DQIENMIK                       | 27 | 3278 | 0.44 | 0.13 | 29 |
| 22 C37H5.8 | DQIENMIK                       | 20 | 3866 | 0.45 | 0.13 | 28 |
| 22 C37H5.8 | DQIENMIK                       | 22 | 4597 | 0.45 | 0.13 | 29 |
| 22 C37H5.8 | FEQIVGDLIK                     | 38 | 1897 | 0.45 | 0.11 | 25 |
| 22 C37H5.8 | LITRNTTIPTK                    | 19 | 1665 | 0.45 | 0.14 | 30 |
| 7 C37H5.8  | DQIENMIK                       | 12 | 2723 | 0.46 | 0.18 | 40 |
| 1 C37H5.8  | LFEAAYK                        | 22 | 662  | 0.46 | 0.16 | 34 |
| 1 C37H5.8  | FEQIVGDLIK                     | 13 | 740  | 0.46 | 0.22 | 48 |
| 7 C37H5.8  | FEQIVGDLIK                     | 27 | 2711 | 0.47 | 0.27 | 58 |
| 22 C37H5.8 | LITRNTTIPTK                    | 20 | 8045 | 0.48 | 0.12 | 25 |
| 10 C37H5.8 | VQATVQEIFGK                    | 23 | 475  | 0.48 | 0.12 | 25 |
| 22 C37H5.8 | FEQIVGDLIK                     | 35 | 1676 | 0.50 | 0.14 | 28 |
| 22 C37H5.8 | VYSPSQVGAFVLMK                 | 67 | 2579 | 0.50 | 0.13 | 26 |
| 1 C37H5.8  | VFQGEREMATSNK                  | 11 | 769  | 0.50 | 0.23 | 47 |
| 10 C37H5.8 | EQQIVIQSSGGLSK                 | 48 | 2007 | 0.50 | 0.19 | 38 |
| 10 C37H5.8 | ASNGDAWVEAQGK                  | 27 | 1073 | 0.50 | 0.12 | 24 |
| 10 C37H5.8 | LITRNTTIPTK                    | 11 | 2422 | 0.51 | 0.06 | 13 |
| 1 C37H5.8  | VQATVQEIFGK                    | 64 | 1325 | 0.51 | 0.16 | 31 |
| 7 C37H5.8  | VQATVQEIFGK                    | 61 | 995  | 0.51 | 0.14 | 28 |
| 22 C37H5.8 | VQATVQEIFGK                    | 46 | 1308 | 0.51 | 0.18 | 35 |
| 10 C37H5.8 | EQQIVIQSSGGLSK                 | 41 | 2911 | 0.52 | 0.14 | 26 |
| 10 C37H5.8 | FEQIVGDLIK                     | 26 | 1746 | 0.53 | 0.11 | 21 |
| 22 C37H5.8 | MTEFADQLPK                     | 14 | 2195 | 0.53 | 0.11 | 20 |
| 7 C37H5.8  | RQAVTNSANTLFATK                | 37 | 1079 | 0.53 | 0.18 | 34 |
| 7 C37H5.8  | ALHDAEVK                       | 15 | 2976 | 0.54 | 0.40 | 75 |
| 7 C37H5.8  | EQQIVIQSSGGLSK                 | 92 | 4970 | 0.54 | 0.18 | 33 |
| 22 C37H5.8 | VYSPSQVGAFVLMK                 | 43 | 1483 | 0.54 | 0.12 | 22 |
| 22 C37H5.8 | DQIENMIK                       | 38 | 1426 | 0.54 | 0.25 | 47 |
| 10 C37H5.8 | DQIENMIK                       | 34 | 3196 | 0.54 | 0.08 | 14 |
| 22 C37H5.8 | VQATVQEIFGK                    | 89 | 4296 | 0.55 | 0.14 | 25 |
| 22 C37H5.8 | LFEAAYK                        | 24 | 1344 | 0.55 | 0.25 | 45 |
| 7 C37H5.8  | DQIENMIK                       | 21 | 2259 | 0.55 | 0.02 | 4  |
| 10 C37H5.8 | VQATVQEIFGK                    | 47 | 806  | 0.56 | 0.27 | 49 |
| 7 C37H5.8  | VQATVQEIFGK                    | 52 | 579  | 0.56 | 0.13 | 24 |
| 7 C37H5.8  | DQIENMIK                       | 17 | 1527 | 0.56 | 0.15 | 28 |
| 7 C37H5.8  | EQQIVIQSSGGLSK                 | 86 | 3656 | 0.56 | 0.09 | 17 |
| 10 C37H5.8 | RQAVTNSANTLFATK                | 61 | 1816 | 0.56 | 0.16 | 29 |
| 10 C37H5.8 | VYSPSQVGAFVLMK                 | 17 | 624  | 0.56 | 0.22 | 39 |
| 7 C37H5.8  | FEQIVGDLIK                     | 38 | 4723 | 0.57 | 0.27 | 48 |
| 1 C37H5.8  | VYSPSQVGAFVLMK                 | 21 | 566  | 0.57 | 0.21 | 36 |
| 22 C37H5.8 | VQATVQEIFGK                    | 75 | 3818 | 0.58 | 0.04 | 7  |
| 10 C37H5.8 | MTEFADQLPK                     | 13 | 3456 | 0.58 | 0.08 | 14 |
| 10 C37H5.8 | FEQIVGDLIK                     | 40 | 2239 | 0.58 | 0.10 | 17 |
| 22 C37H5.8 | FEQIVGDLIK                     | 25 | 767  | 0.58 | 0.12 | 20 |
| 1 C37H5.8  | FEQIVGDLIK                     | 32 | 671  | 0.58 | 0.11 | 19 |
| 1 C37H5.8  | SQVFSTAADGQTQVQIK              | 15 | 1874 | 0.59 | 0.31 | 52 |
| 22 C37H5.8 | ASNGDAWVEAQGK                  | 16 | 1547 | 0.60 | 0.11 | 19 |
| 22 C37H5.8 | VQATVQEIFGK                    | 50 | 989  | 0.60 | 0.18 | 31 |
| 1 C37H5.8  | LFEAAYK                        | 22 | 651  | 0.61 | 0.18 | 30 |
| 22 C37H5.8 | VQATVQEIFGK                    | 45 | 1106 | 0.61 | 0.26 | 43 |
| 22 C37H5.8 | MTEFADQLPK                     | 44 | 4918 | 0.61 | 0.22 | 35 |
| 10 C37H5.8 | LITRNTTIPTK                    | 15 | 3861 | 0.61 | 0.29 | 47 |
| 7 C37H5.8  | FEQIVGDLIK                     | 34 | 3598 | 0.62 | 0.24 | 38 |
| 10 C37H5.8 | SQVFSTAADGQTQVQIK              | 75 | 3042 | 0.62 | 0.07 | 12 |
| 22 C37H5.8 | ALHDAEVK                       | 12 | 1122 | 0.62 | 0.14 | 23 |
| 1 C37H5.8  | VQATVQEIFGK                    | 30 | 490  | 0.63 | 0.20 | 32 |
| 22 C37H5.8 | RQAVTNSANTLFATK                | 78 | 4125 | 0.63 | 0.08 | 12 |
| 22 C37H5.8 | RQAVTNSANTLFATK                | 73 | 2704 | 0.63 | 0.16 | 26 |
| 22 C37H5.8 | LITRNTTIPTK                    | 11 | 1686 | 0.63 | 0.13 | 21 |
| 10 C37H5.8 | LFEAAYK                        | 20 | 987  | 0.63 | 0.16 | 26 |
| 1 C37H5.8  | VQATVQEIFGK                    | 63 | 948  | 0.63 | 0.11 | 18 |
| 22 C37H5.8 | VQATVQEIFGK                    | 40 | 1756 | 0.63 | 0.12 | 19 |
| 10 C37H5.8 | VQATVQEIFGK                    | 57 | 1019 | 0.63 | 0.29 | 45 |
| 10 C37H5.8 | SQVFSTAADGQTQVQIK              | 77 | 2241 | 0.64 | 0.16 | 24 |
| 22 C37H5.8 | LITRNTTIPTK                    | 25 | 7193 | 0.64 | 0.23 | 37 |
| 22 C37H5.8 | EQQIVIQSSGGLSK                 | 68 | 2432 | 0.64 | 0.20 | 32 |
| 22 C37H5.8 | EQQIVIQSSGGLSK                 | 81 | 2374 | 0.65 | 0.19 | 29 |
| 22 C37H5.8 | RQAVTNSANTLFATK                | 62 | 2414 | 0.65 | 0.23 | 36 |
| 10 C37H5.8 | MTEFADQLPK                     | 40 | 9195 | 0.65 | 0.09 | 14 |
| 22 C37H5.8 | MTEFADQLPK                     | 41 | 3978 | 0.65 | 0.10 | 16 |
| 10 C37H5.8 | FEQIVGDLIK                     | 19 | 929  | 0.65 | 0.23 | 35 |
| 22 C37H5.8 | FEQIVGDLIK                     | 28 | 897  | 0.66 | 0.53 | 80 |
| 1 C37H5.8  | DQIENMIK                       | 21 | 2024 | 0.66 | 0.06 | 10 |
| 7 C37H5.8  | VQATVQEIFGK                    | 39 | 594  | 0.66 | 0.20 | 31 |
| 22 C37H5.8 | VYSPSQVGAFVLMK                 | 28 | 1276 | 0.66 | 0.15 | 23 |
| 10 C37H5.8 | ASNGDAWVEAQGK                  | 21 | 1214 | 0.66 | 0.13 | 19 |
| 22 C37H5.8 | SSQIADVLLVGGMSRMPK             | 58 | 1228 | 0.66 | 0.19 | 29 |
| 7 C37H5.8  | LITRNTTIPTK                    | 13 | 1859 | 0.66 | 0.17 | 25 |
| 22 C37H5.8 | MTEFADQLPK                     | 16 | 1132 | 0.67 | 0.11 | 16 |
| 1 C37H5.8  | LFEAAYK                        | 21 | 576  | 0.67 | 0.12 | 19 |
| 10 C37H5.8 | VIENAEGVRTTPSTVAFTADGERLVGAPAK | 33 | 3875 | 0.68 | 0.17 | 25 |
| 22 C37H5.8 | EQGVDLTK                       | 21 | 7804 | 0.68 | 0.15 | 21 |
| 22 C37H5.8 | MTEFADQLPK                     | 39 | 5214 | 0.68 | 0.12 | 18 |
| 7 C37H5.8  | DQIENMIK                       | 15 | 1433 | 0.69 | 0.14 | 20 |
| 1 C37H5.8  | SSQIADVLLVGGMSRMPK             | 22 | 2387 | 0.69 | 0.14 | 21 |
| 10 C37H5.8 | SSQIADVLLVGGMSRMPK             | 46 | 1832 | 0.69 | 0.12 | 18 |
| 10 C37H5.8 | VQATVQEIFGK                    | 40 | 730  | 0.70 | 0.11 | 16 |
| 10 C37H5.8 | VQATVQEIFGK                    | 54 | 996  | 0.70 | 0.26 | 37 |
| 22 C37H5.8 | DQIENMIK                       | 18 | 5267 | 0.70 | 0.09 | 12 |
| 7 C37H5.8  | EQQIVIQSSGGLSK                 | 75 | 4084 | 0.70 | 0.26 | 37 |
| 22 C37H5.8 | FEQIVGDLIK                     | 18 | 951  | 0.70 | 0.23 | 32 |
| 1 C37H5.8  | LITRNTTIPTK                    | 14 | 2973 | 0.70 | 0.10 | 14 |

|            |                                |     |      |      |      |    |
|------------|--------------------------------|-----|------|------|------|----|
| 22 C37H5.8 | VQATVQEIFGK                    | 48  | 1125 | 0.71 | 0.22 | 31 |
| 10 C37H5.8 | MTEFADQLPK                     | 58  | 8597 | 0.71 | 0.10 | 14 |
| 10 C37H5.8 | ASNGDAWVEAQGK                  | 34  | 1717 | 0.71 | 0.10 | 14 |
| 7 C37H5.8  | EQQIVIQSSGGLSK                 | 77  | 2910 | 0.71 | 0.10 | 14 |
| 7 C37H5.8  | VQATVQEIFGK                    | 55  | 1084 | 0.72 | 0.17 | 24 |
| 10 C37H5.8 | ASNGDAWVEAQGK                  | 36  | 1293 | 0.72 | 0.14 | 20 |
| 10 C37H5.8 | EQQIVIQSSGGLSK                 | 55  | 3642 | 0.72 | 0.15 | 21 |
| 10 C37H5.8 | ASNGDAWVEAQGK                  | 11  | 847  | 0.72 | 0.20 | 28 |
| 1 C37H5.8  | VFQGEREMATSNK                  | 34  | 1399 | 0.73 | 0.12 | 17 |
| 22 C37H5.8 | MTEFADQLPK                     | 36  | 3229 | 0.73 | 0.09 | 13 |
| 22 C37H5.8 | DQIENMIK                       | 36  | 1944 | 0.73 | 0.08 | 10 |
| 1 C37H5.8  | MTEFADQLPK                     | 36  | 2968 | 0.73 | 0.07 | 10 |
| 7 C37H5.8  | LITRNTTIPTK                    | 23  | 2666 | 0.73 | 0.13 | 18 |
| 1 C37H5.8  | VYSPSQVGAFVLMK                 | 35  | 961  | 0.73 | 0.15 | 20 |
| 1 C37H5.8  | DQIENMIK                       | 10  | 498  | 0.74 | 0.18 | 24 |
| 1 C37H5.8  | VYSPSQVGAFVLMK                 | 31  | 988  | 0.74 | 0.21 | 29 |
| 22 C37H5.8 | LITRNTTIPTK                    | 14  | 4908 | 0.74 | 0.06 | 8  |
| 7 C37H5.8  | VQATVQEIFGK                    | 63  | 1277 | 0.74 | 0.18 | 24 |
| 22 C37H5.8 | GVFEVK                         | 39  | 2329 | 0.75 | 0.08 | 10 |
| 22 C37H5.8 | LFEAAYK                        | 45  | 4268 | 0.75 | 0.09 | 12 |
| 1 C37H5.8  | MTEFADQLPK                     | 48  | 2591 | 0.75 | 0.10 | 13 |
| 22 C37H5.8 | VYSPSQVGAFVLMK                 | 23  | 1478 | 0.76 | 0.05 | 7  |
| 1 C37H5.8  | MTEFADQLPK                     | 11  | 858  | 0.76 | 0.12 | 16 |
| 7 C37H5.8  | VQATVQEIFGK                    | 70  | 1170 | 0.77 | 0.15 | 19 |
| 10 C37H5.8 | SSQIADVLLVGGMSRMPK             | 56  | 1716 | 0.77 | 0.25 | 32 |
| 1 C37H5.8  | FEQIVGDLIK                     | 30  | 691  | 0.77 | 0.14 | 18 |
| 10 C37H5.8 | VFQGEREMATSNK                  | 21  | 1180 | 0.77 | 0.17 | 21 |
| 1 C37H5.8  | VFQGEREMATSNK                  | 15  | 894  | 0.77 | 0.15 | 19 |
| 10 C37H5.8 | VYSPSQVGAFVLMK                 | 23  | 1172 | 0.78 | 0.11 | 14 |
| 1 C37H5.8  | VQATVQEIFGK                    | 76  | 1344 | 0.78 | 0.13 | 17 |
| 1 C37H5.8  | LITRNTTIPTK                    | 19  | 3549 | 0.78 | 0.16 | 21 |
| 22 C37H5.8 | GVFEVK                         | 30  | 1865 | 0.78 | 0.16 | 20 |
| 10 C37H5.8 | VQATVQEIFGK                    | 11  | 707  | 0.79 | 0.18 | 23 |
| 7 C37H5.8  | RQAVTNSANTLFATK                | 56  | 1242 | 0.79 | 0.15 | 19 |
| 22 C37H5.8 | LFEAAYK                        | 33  | 1907 | 0.79 | 0.18 | 22 |
| 7 C37H5.8  | RQAVTNSANTLFATK                | 70  | 1783 | 0.79 | 0.16 | 21 |
| 1 C37H5.8  | VQATVQEIFGK                    | 25  | 327  | 0.79 | 0.32 | 40 |
| 10 C37H5.8 | VYSPSQVGAFVLMK                 | 48  | 922  | 0.80 | 0.24 | 30 |
| 7 C37H5.8  | VQATVQEIFGK                    | 71  | 1123 | 0.80 | 0.21 | 26 |
| 7 C37H5.8  | RQAVTNSANTLFATK                | 30  | 862  | 0.80 | 0.21 | 26 |
| 10 C37H5.8 | VFQGEREMATSNK                  | 15  | 3078 | 0.81 | 0.14 | 17 |
| 10 C37H5.8 | VYSPSQVGAFVLMK                 | 52  | 1687 | 0.81 | 0.15 | 18 |
| 1 C37H5.8  | FEQIVGDLIK                     | 18  | 966  | 0.82 | 0.12 | 15 |
| 7 C37H5.8  | VQATVQEIFGK                    | 45  | 1109 | 0.82 | 0.22 | 27 |
| 1 C37H5.8  | VQATVQEIFGK                    | 50  | 984  | 0.82 | 0.13 | 16 |
| 7 C37H5.8  | MTEFADQLPK                     | 28  | 1361 | 0.82 | 0.23 | 28 |
| 22 C37H5.8 | VQATVQEIFGK                    | 32  | 707  | 0.83 | 0.24 | 29 |
| 10 C37H5.8 | MTEFADQLPK                     | 30  | 3617 | 0.83 | 0.11 | 14 |
| 22 C37H5.8 | DQIENMIK                       | 15  | 3953 | 0.83 | 0.08 | 10 |
| 10 C37H5.8 | VQATVQEIFGK                    | 71  | 3748 | 0.84 | 0.09 | 11 |
| 7 C37H5.8  | VQATVQEIFGK                    | 69  | 2397 | 0.84 | 0.11 | 14 |
| 10 C37H5.8 | VQATVQEIFGK                    | 59  | 1163 | 0.84 | 0.18 | 22 |
| 10 C37H5.8 | VFQGEREMATSNK                  | 28  | 1136 | 0.85 | 0.08 | 9  |
| 22 C37H5.8 | VYSPSQVGAFVLMK                 | 59  | 5195 | 0.85 | 0.17 | 20 |
| 22 C37H5.8 | VYSPSQVGAFVLMK                 | 13  | 834  | 0.85 | 0.22 | 26 |
| 1 C37H5.8  | SQVFSTAADGQTQVQIK              | 92  | 1789 | 0.85 | 0.12 | 14 |
| 7 C37H5.8  | SQVFSTAADGQTQVQIK              | 110 | 3126 | 0.85 | 0.13 | 15 |
| 1 C37H5.8  | SSQIADVLLVGGMSRMPK             | 31  | 3228 | 0.85 | 0.22 | 26 |
| 10 C37H5.8 | VQATVQEIFGK                    | 63  | 2582 | 0.85 | 0.09 | 10 |
| 10 C37H5.8 | VYSPSQVGAFVLMK                 | 31  | 1724 | 0.85 | 0.17 | 20 |
| 7 C37H5.8  | VYSPSQVGAFVLMK                 | 16  | 1146 | 0.86 | 0.25 | 29 |
| 22 C37H5.8 | FEQIVGDLIK                     | 20  | 836  | 0.86 | 0.16 | 18 |
| 1 C37H5.8  | RQAVTNSANTLFATK                | 69  | 1955 | 0.86 | 0.19 | 22 |
| 22 C37H5.8 | VIENAEGVRTTPSTVAFTADGERLVGAPAK | 20  | 9156 | 0.86 | 0.13 | 15 |
| 7 C37H5.8  | VYSPSQVGAFVLMK                 | 38  | 951  | 0.86 | 0.15 | 17 |
| 10 C37H5.8 | FEQIVGDLIK                     | 27  | 1341 | 0.87 | 0.14 | 16 |
| 1 C37H5.8  | LITRNTTIPTK                    | 27  | 1661 | 0.87 | 0.26 | 30 |
| 7 C37H5.8  | RQAVTNSANTLFATK                | 48  | 1317 | 0.87 | 0.12 | 14 |
| 10 C37H5.8 | FEQIVGDLIK                     | 19  | 1030 | 0.87 | 0.09 | 10 |
| 22 C37H5.8 | FEQIVGDLIK                     | 29  | 1115 | 0.87 | 0.12 | 14 |
| 10 C37H5.8 | VQATVQEIFGK                    | 70  | 937  | 0.87 | 0.20 | 23 |
| 7 C37H5.8  | VQATVQEIFGK                    | 70  | 1613 | 0.88 | 0.19 | 22 |
| 10 C37H5.8 | SQVFSTAADGQTQVQIK              | 83  | 3906 | 0.88 | 0.09 | 10 |
| 7 C37H5.8  | EQQIVIQSSGGLSK                 | 102 | 3228 | 0.88 | 0.17 | 19 |
| 1 C37H5.8  | EQQIVIQSSGGLSK                 | 99  | 2091 | 0.88 | 0.09 | 11 |
| 7 C37H5.8  | LITRNTTIPTK                    | 13  | 6370 | 0.88 | 0.18 | 21 |
| 10 C37H5.8 | DQIENMIK                       | 27  | 3753 | 0.88 | 0.14 | 16 |
| 1 C37H5.8  | VQATVQEIFGK                    | 71  | 1071 | 0.88 | 0.11 | 12 |
| 7 C37H5.8  | VQATVQEIFGK                    | 58  | 1197 | 0.88 | 0.16 | 18 |
| 10 C37H5.8 | VQATVQEIFGK                    | 62  | 2793 | 0.89 | 0.08 | 9  |
| 10 C37H5.8 | VYSPSQVGAFVLMK                 | 34  | 1166 | 0.89 | 0.14 | 16 |
| 10 C37H5.8 | VQATVQEIFGK                    | 42  | 610  | 0.89 | 0.30 | 34 |
| 1 C37H5.8  | FEQIVGDLIK                     | 18  | 665  | 0.89 | 0.04 | 4  |
| 10 C37H5.8 | VQATVQEIFGK                    | 64  | 1113 | 0.89 | 0.21 | 23 |
| 22 C37H5.8 | RQAVTNSANTLFATK                | 53  | 1367 | 0.90 | 0.13 | 15 |
| 1 C37H5.8  | VYSPSQVGAFVLMK                 | 43  | 1583 | 0.90 | 0.17 | 19 |
| 22 C37H5.8 | ASNGDAWVEAQGK                  | 32  | 2556 | 0.90 | 0.08 | 9  |
| 1 C37H5.8  | VYSPSQVGAFVLMK                 | 29  | 706  | 0.91 | 0.12 | 13 |
| 22 C37H5.8 | ELVEVINQAEGIIHDTEAK            | 96  | 2842 | 0.91 | 0.21 | 23 |
| 22 C37H5.8 | LITRNTTIPTK                    | 13  | 2948 | 0.92 | 0.03 | 3  |
| 10 C37H5.8 | SSQIADVLLVGGMSRMPK             | 70  | 1527 | 0.92 | 0.12 | 13 |
| 1 C37H5.8  | FEQIVGDLIK                     | 21  | 716  | 0.92 | 0.13 | 14 |
| 22 C37H5.8 | VFQGEREMATSNK                  | 40  | 3751 | 0.92 | 0.10 | 11 |
| 10 C37H5.8 | FEQIVGDLIK                     | 35  | 2679 | 0.93 | 0.19 | 20 |
| 10 C37H5.8 | DQIENMIK                       | 15  | 3107 | 0.93 | 0.10 | 10 |
| 22 C37H5.8 | EQQIVIQSSGGLSK                 | 49  | 1696 | 0.93 | 0.14 | 16 |
| 10 C37H5.8 | VQATVQEIFGK                    | 70  | 3046 | 0.93 | 0.08 | 9  |
| 1 C37H5.8  | VFQGEREMATSNK                  | 33  | 1343 | 0.93 | 0.16 | 17 |
| 1 C37H5.8  | FEQIVGDLIK                     | 33  | 1114 | 0.93 | 0.26 | 28 |
| 7 C37H5.8  | RQAVTNSANTLFATK                | 15  | 1679 | 0.94 | 0.29 | 31 |
| 10 C37H5.8 | LITRNTTIPTK                    | 15  | 4988 | 0.94 | 0.04 | 4  |

|            |                                |     |       |      |      |    |
|------------|--------------------------------|-----|-------|------|------|----|
| 22 C37H5.8 | LITRNTTIPTK                    | 28  | 1801  | 0.94 | 0.16 | 17 |
| 10 C37H5.8 | SQVFSTAADGQTQVQIK              | 94  | 3895  | 0.94 | 0.14 | 14 |
| 1 C37H5.8  | MTEFADQLPK                     | 15  | 1328  | 0.95 | 0.11 | 11 |
| 7 C37H5.8  | VQATVQEIFGK                    | 60  | 1263  | 0.96 | 0.13 | 14 |
| 7 C37H5.8  | LITRNTTIPTK                    | 17  | 1875  | 0.96 | 0.10 | 11 |
| 7 C37H5.8  | LITRNTTIPTK                    | 18  | 2763  | 0.97 | 0.21 | 22 |
| 7 C37H5.8  | RQAVTNSANTLFATK                | 12  | 1308  | 0.97 | 0.25 | 25 |
| 1 C37H5.8  | SSQIADVLLVGGMSRMPK             | 24  | 2781  | 0.97 | 0.18 | 19 |
| 10 C37H5.8 | VYSPSQVGAFVLMK                 | 42  | 2169  | 0.97 | 0.27 | 28 |
| 7 C37H5.8  | RQAVTNSANTLFATK                | 40  | 761   | 0.97 | 0.14 | 15 |
| 1 C37H5.8  | LITRNTTIPTK                    | 17  | 2800  | 0.97 | 0.13 | 13 |
| 7 C37H5.8  | EQQIVIQSSGGLSK                 | 68  | 3171  | 0.99 | 0.17 | 17 |
| 22 C37H5.8 | ASNGDAWVEAQGK                  | 34  | 1512  | 0.99 | 0.10 | 10 |
| 10 C37H5.8 | MTEFADQLPK                     | 55  | 15158 | 0.99 | 0.08 | 8  |
| 7 C37H5.8  | LITRNTTIPTK                    | 23  | 4937  | 0.99 | 0.10 | 10 |
| 10 C37H5.8 | LITRNTTIPTK                    | 34  | 10143 | 1.00 | 0.14 | 14 |
| 22 C37H5.8 | SSQIADVLLVGGMSRMPK             | 35  | 872   | 1.00 | 0.20 | 20 |
| 10 C37H5.8 | VFQGEREMATSNK                  | 23  | 2354  | 1.00 | 0.05 | 5  |
| 7 C37H5.8  | VYSPSQVGAFVLMK                 | 27  | 1848  | 1.01 | 0.17 | 17 |
| 10 C37H5.8 | LITRNTTIPTK                    | 19  | 4279  | 1.01 | 0.15 | 15 |
| 22 C37H5.8 | VFQGEREMATSNK                  | 20  | 741   | 1.02 | 0.32 | 31 |
| 1 C37H5.8  | FEQIVGDLIK                     | 32  | 870   | 1.02 | 0.18 | 18 |
| 10 C37H5.8 | VIENAEGVRTTPSTVAFTADGERLVGAPAK | 20  | 7250  | 1.03 | 0.17 | 17 |
| 1 C37H5.8  | RQAVTNSANTLFATK                | 59  | 790   | 1.03 | 0.21 | 20 |
| 10 C37H5.8 | VIENAEGVRTTPSTVAFTADGERLVGAPAK | 16  | 9517  | 1.03 | 0.18 | 18 |
| 1 C37H5.8  | EQQIVIQSSGGLSK                 | 75  | 2256  | 1.03 | 0.12 | 11 |
| 10 C37H5.8 | LITRNTTIPTK                    | 14  | 4670  | 1.04 | 0.16 | 16 |
| 10 C37H5.8 | VYSPSQVGAFVLMK                 | 75  | 1810  | 1.04 | 0.14 | 14 |
| 10 C37H5.8 | SSQIADVLLVGGMSRMPK             | 12  | 1374  | 1.04 | 0.17 | 17 |
| 10 C37H5.8 | VQATVQEIFGK                    | 36  | 1140  | 1.04 | 0.17 | 16 |
| 10 C37H5.8 | VQATVQEIFGK                    | 49  | 951   | 1.05 | 0.18 | 17 |
| 7 C37H5.8  | SQVFSTAADGQTQVQIK              | 89  | 3292  | 1.05 | 0.13 | 12 |
| 10 C37H5.8 | MTEFADQLPK                     | 43  | 19020 | 1.05 | 0.05 | 5  |
| 1 C37H5.8  | EQQIVIQSSGGLSK                 | 96  | 2800  | 1.05 | 0.08 | 8  |
| 22 C37H5.8 | VYSPSQVGAFVLMK                 | 24  | 1983  | 1.05 | 0.18 | 17 |
| 22 C37H5.8 | VYSPSQVGAFVLMK                 | 51  | 3802  | 1.06 | 0.09 | 9  |
| 1 C37H5.8  | LITRNTTIPTK                    | 32  | 4157  | 1.06 | 0.14 | 13 |
| 22 C37H5.8 | ELVEVINQAEIIHDTEAK             | 80  | 5632  | 1.06 | 0.13 | 12 |
| 1 C37H5.8  | LITRNTTIPTK                    | 18  | 2513  | 1.06 | 0.27 | 26 |
| 1 C37H5.8  | MTEFADQLPK                     | 25  | 1182  | 1.07 | 0.12 | 11 |
| 10 C37H5.8 | VQATVQEIFGK                    | 72  | 1793  | 1.07 | 0.16 | 15 |
| 7 C37H5.8  | SQVFSTAADGQTQVQIK              | 118 | 2629  | 1.07 | 0.11 | 11 |
| 10 C37H5.8 | FEQIVGDLIK                     | 10  | 861   | 1.07 | 0.16 | 15 |
| 10 C37H5.8 | RQAVTNSANTLFATK                | 37  | 10431 | 1.07 | 0.21 | 19 |
| 7 C37H5.8  | RQAVTNSANTLFATK                | 26  | 472   | 1.08 | 0.11 | 10 |
| 10 C37H5.8 | LITRNTTIPTK                    | 19  | 13745 | 1.08 | 0.16 | 15 |
| 1 C37H5.8  | MTEFADQLPK                     | 31  | 1561  | 1.08 | 0.23 | 21 |
| 7 C37H5.8  | MTEFADQLPK                     | 17  | 1896  | 1.09 | 0.19 | 18 |
| 22 C37H5.8 | VFQGEREMATSNK                  | 19  | 1098  | 1.09 | 0.33 | 30 |
| 1 C37H5.8  | VYSPSQVGAFVLMK                 | 37  | 1230  | 1.09 | 0.14 | 13 |
| 22 C37H5.8 | VYSPSQVGAFVLMK                 | 32  | 1063  | 1.09 | 0.20 | 18 |
| 1 C37H5.8  | LITRNTTIPTK                    | 27  | 2637  | 1.10 | 0.07 | 6  |
| 10 C37H5.8 | FEQIVGDLIK                     | 17  | 1150  | 1.10 | 0.15 | 13 |
| 1 C37H5.8  | LITRNTTIPTK                    | 32  | 4394  | 1.10 | 0.13 | 12 |
| 7 C37H5.8  | VYSPSQVGAFVLMK                 | 19  | 808   | 1.10 | 0.23 | 21 |
| 10 C37H5.8 | VIENAEGVRTTPSTVAFTADGERLVGAPAK | 36  | 11691 | 1.10 | 0.12 | 11 |
| 1 C37H5.8  | MTEFADQLPK                     | 44  | 3683  | 1.11 | 0.14 | 12 |
| 7 C37H5.8  | LITRNTTIPTK                    | 11  | 1344  | 1.11 | 0.22 | 20 |
| 10 C37H5.8 | VYSPSQVGAFVLMK                 | 40  | 2550  | 1.11 | 0.26 | 24 |
| 22 C37H5.8 | VFQGEREMATSNK                  | 11  | 1050  | 1.11 | 0.12 | 10 |
| 7 C37H5.8  | VYSPSQVGAFVLMK                 | 55  | 2804  | 1.12 | 0.13 | 12 |
| 22 C37H5.8 | LFEAAYK                        | 19  | 835   | 1.12 | 0.10 | 9  |
| 1 C37H5.8  | SQVFSTAADGQTQVQIK              | 12  | 1946  | 1.12 | 0.11 | 10 |
| 10 C37H5.8 | VIENAEGVRTTPSTVAFTADGERLVGAPAK | 11  | 4821  | 1.12 | 0.29 | 26 |
| 10 C37H5.8 | LITRNTTIPTK                    | 17  | 2927  | 1.13 | 0.33 | 29 |
| 22 C37H5.8 | VYSPSQVGAFVLMK                 | 63  | 2149  | 1.14 | 0.09 | 8  |
| 1 C37H5.8  | VFQGEREMATSNK                  | 28  | 1033  | 1.14 | 0.05 | 4  |
| 10 C37H5.8 | LITRNTTIPTK                    | 12  | 3817  | 1.15 | 0.13 | 11 |
| 1 C37H5.8  | VFQGEREMATSNK                  | 27  | 1385  | 1.15 | 0.17 | 14 |
| 7 C37H5.8  | RQAVTNSANTLFATK                | 18  | 1335  | 1.15 | 0.19 | 16 |
| 7 C37H5.8  | RQAVTNSANTLFATK                | 53  | 1697  | 1.15 | 0.21 | 19 |
| 22 C37H5.8 | VFQGEREMATSNK                  | 25  | 3144  | 1.15 | 0.06 | 6  |
| 10 C37H5.8 | VYSPSQVGAFVLMK                 | 28  | 1532  | 1.15 | 0.14 | 12 |
| 1 C37H5.8  | FEQIVGDLIK                     | 14  | 901   | 1.15 | 0.18 | 15 |
| 7 C37H5.8  | VQATVQEIFGK                    | 56  | 1737  | 1.15 | 0.10 | 9  |
| 22 C37H5.8 | VYSPSQVGAFVLMK                 | 78  | 2442  | 1.15 | 0.15 | 13 |
| 1 C37H5.8  | VQATVQEIFGK                    | 33  | 800   | 1.16 | 0.23 | 20 |
| 22 C37H5.8 | VFQGEREMATSNK                  | 24  | 1568  | 1.16 | 0.06 | 5  |
| 10 C37H5.8 | LITRNTTIPTK                    | 21  | 3485  | 1.16 | 0.07 | 6  |
| 22 C37H5.8 | RQAVTNSANTLFATK                | 57  | 3617  | 1.17 | 0.06 | 6  |
| 22 C37H5.8 | ELVEVINQAEIIHDTEAK             | 74  | 3191  | 1.17 | 0.14 | 12 |
| 10 C37H5.8 | RQAVTNSANTLFATK                | 72  | 2093  | 1.17 | 0.16 | 14 |
| 10 C37H5.8 | LFEAAYK                        | 21  | 1219  | 1.17 | 0.13 | 11 |
| 1 C37H5.8  | VYSPSQVGAFVLMK                 | 27  | 853   | 1.18 | 0.15 | 12 |
| 7 C37H5.8  | RQAVTNSANTLFATK                | 55  | 1485  | 1.18 | 0.12 | 10 |
| 1 C37H5.8  | VQATVQEIFGK                    | 59  | 740   | 1.19 | 0.16 | 14 |
| 1 C37H5.8  | MTEFADQLPK                     | 19  | 1867  | 1.19 | 0.27 | 23 |
| 1 C37H5.8  | EQQIVIQSSGGLSK                 | 97  | 2713  | 1.20 | 0.17 | 14 |
| 1 C37H5.8  | VYSPSQVGAFVLMK                 | 33  | 1116  | 1.21 | 0.19 | 15 |
| 7 C37H5.8  | LITRNTTIPTK                    | 18  | 4030  | 1.21 | 0.09 | 8  |
| 7 C37H5.8  | VQATVQEIFGK                    | 78  | 1737  | 1.21 | 0.19 | 16 |
| 22 C37H5.8 | VQATVQEIFGK                    | 59  | 1300  | 1.21 | 0.15 | 12 |
| 22 C37H5.8 | VIENAEGVRTTPSTVAFTADGERLVGAPAK | 23  | 11740 | 1.22 | 0.18 | 15 |
| 10 C37H5.8 | VQATVQEIFGK                    | 42  | 811   | 1.22 | 0.11 | 9  |
| 10 C37H5.8 | VQATVQEIFGK                    | 36  | 1401  | 1.22 | 0.12 | 10 |
| 10 C37H5.8 | VYSPSQVGAFVLMK                 | 65  | 2073  | 1.22 | 0.15 | 12 |
| 22 C37H5.8 | DQIENMIK                       | 31  | 5934  | 1.22 | 0.15 | 12 |
| 22 C37H5.8 | MTEFADQLPK                     | 15  | 2069  | 1.23 | 0.12 | 10 |
| 1 C37H5.8  | VQATVQEIFGK                    | 41  | 458   | 1.25 | 0.22 | 18 |
| 1 C37H5.8  | SQVFSTAADGQTQVQIK              | 86  | 2172  | 1.25 | 0.15 | 12 |
| 22 C37H5.8 | LITRNTTIPTK                    | 30  | 5077  | 1.25 | 0.06 | 5  |

|            |                                |     |       |      |      |    |
|------------|--------------------------------|-----|-------|------|------|----|
| 22 C37H5.8 | VYSPSQVGAFVLMK                 | 28  | 1764  | 1.26 | 0.15 | 12 |
| 7 C37H5.8  | RQAVTNSANTLFATK                | 36  | 612   | 1.26 | 0.25 | 20 |
| 10 C37H5.8 | VQATVQEIFGK                    | 61  | 1580  | 1.26 | 0.08 | 6  |
| 22 C37H5.8 | SSQIADVLLVGGMSRMPK             | 13  | 13477 | 1.27 | 0.22 | 17 |
| 7 C37H5.8  | VYSPSQVGAFVLMK                 | 57  | 3201  | 1.27 | 0.10 | 8  |
| 7 C37H5.8  | LITRNTTIPTK                    | 13  | 3069  | 1.28 | 0.07 | 6  |
| 1 C37H5.8  | LFEAAYK                        | 23  | 696   | 1.28 | 0.16 | 12 |
| 22 C37H5.8 | FEQIVGDLIK                     | 43  | 768   | 1.28 | 0.14 | 11 |
| 10 C37H5.8 | RQAVTNSANTLFATK                | 33  | 5437  | 1.28 | 0.22 | 17 |
| 22 C37H5.8 | VIENAEGVRTTPSTVAFTADGERLVGAPAK | 17  | 20209 | 1.28 | 0.23 | 18 |
| 1 C37H5.8  | VYSPSQVGAFVLMK                 | 52  | 1380  | 1.29 | 0.14 | 11 |
| 1 C37H5.8  | VQATVQEIFGK                    | 36  | 833   | 1.29 | 0.11 | 9  |
| 1 C37H5.8  | MTEFADQLPK                     | 46  | 3800  | 1.29 | 0.19 | 14 |
| 22 C37H5.8 | RQAVTNSANTLFATK                | 70  | 3449  | 1.30 | 0.14 | 11 |
| 7 C37H5.8  | DQIENMIK                       | 13  | 1549  | 1.32 | 0.21 | 16 |
| 22 C37H5.8 | MTEFADQLPK                     | 34  | 4315  | 1.32 | 0.12 | 9  |
| 7 C37H5.8  | SQVFSTAADGQTQVQIK              | 17  | 3743  | 1.32 | 0.15 | 11 |
| 10 C37H5.8 | RQAVTNSANTLFATK                | 70  | 4082  | 1.33 | 0.16 | 12 |
| 1 C37H5.8  | VQATVQEIFGK                    | 68  | 969   | 1.33 | 0.14 | 11 |
| 1 C37H5.8  | VQATVQEIFGK                    | 54  | 1334  | 1.33 | 0.15 | 11 |
| 10 C37H5.8 | SSQIADVLLVGGMSRMPK             | 27  | 1101  | 1.34 | 0.18 | 13 |
| 10 C37H5.8 | VYSPSQVGAFVLMK                 | 74  | 2612  | 1.34 | 0.16 | 12 |
| 7 C37H5.8  | VYSPSQVGAFVLMK                 | 28  | 1930  | 1.34 | 0.16 | 12 |
| 10 C37H5.8 | SQVFSTAADGQTQVQIK              | 116 | 8225  | 1.35 | 0.10 | 7  |
| 7 C37H5.8  | RQAVTNSANTLFATK                | 19  | 10144 | 1.35 | 0.28 | 21 |
| 7 C37H5.8  | VQATVQEIFGK                    | 51  | 1178  | 1.36 | 0.19 | 14 |
| 7 C37H5.8  | LITRNTTIPTK                    | 21  | 3944  | 1.37 | 0.21 | 15 |
| 10 C37H5.8 | LITRNTTIPTK                    | 16  | 4080  | 1.39 | 0.03 | 2  |
| 10 C37H5.8 | VYSPSQVGAFVLMK                 | 55  | 1537  | 1.39 | 0.20 | 14 |
| 1 C37H5.8  | VQATVQEIFGK                    | 59  | 863   | 1.39 | 0.13 | 9  |
| 10 C37H5.8 | RQAVTNSANTLFATK                | 59  | 1997  | 1.39 | 0.11 | 8  |
| 22 C37H5.8 | LITRNTTIPTK                    | 17  | 4853  | 1.39 | 0.33 | 24 |
| 22 C37H5.8 | VQATVQEIFGK                    | 84  | 3209  | 1.40 | 0.11 | 8  |
| 7 C37H5.8  | RQAVTNSANTLFATK                | 20  | 1643  | 1.41 | 0.21 | 15 |
| 1 C37H5.8  | VFQGEREMATSNK                  | 21  | 1443  | 1.41 | 0.21 | 15 |
| 10 C37H5.8 | RQAVTNSANTLFATK                | 28  | 5750  | 1.43 | 0.21 | 15 |
| 10 C37H5.8 | VQATVQEIFGK                    | 20  | 901   | 1.44 | 0.12 | 8  |
| 22 C37H5.8 | ELVEVINQAEIIHDTEAK             | 61  | 5995  | 1.45 | 0.19 | 13 |
| 22 C37H5.8 | VFQGEREMATSNK                  | 11  | 8525  | 1.45 | 0.16 | 11 |
| 22 C37H5.8 | VYSPSQVGAFVLMK                 | 18  | 1184  | 1.47 | 0.20 | 14 |
| 1 C37H5.8  | VQATVQEIFGK                    | 49  | 1098  | 1.47 | 0.12 | 8  |
| 22 C37H5.8 | RQAVTNSANTLFATK                | 30  | 8502  | 1.47 | 0.17 | 12 |
| 10 C37H5.8 | RQAVTNSANTLFATK                | 64  | 4162  | 1.49 | 0.17 | 11 |
| 22 C37H5.8 | FEQIVGDLIK                     | 10  | 676   | 1.49 | 0.14 | 10 |
| 22 C37H5.8 | VFQGEREMATSNK                  | 14  | 1161  | 1.50 | 0.12 | 8  |
| 7 C37H5.8  | VQATVQEIFGK                    | 65  | 1689  | 1.51 | 0.13 | 9  |
| 1 C37H5.8  | RQAVTNSANTLFATK                | 47  | 6342  | 1.51 | 0.25 | 17 |
| 1 C37H5.8  | FEQIVGDLIK                     | 25  | 753   | 1.51 | 0.15 | 10 |
| 22 C37H5.8 | VQATVQEIFGK                    | 76  | 2595  | 1.52 | 0.08 | 5  |
| 10 C37H5.8 | VQATVQEIFGK                    | 54  | 1229  | 1.53 | 0.21 | 14 |
| 22 C37H5.8 | DQIENMIK                       | 45  | 6869  | 1.53 | 0.14 | 9  |
| 22 C37H5.8 | EQQIVIQSSGGLSK                 | 95  | 5128  | 1.54 | 0.11 | 7  |
| 22 C37H5.8 | VFQGEREMATSNK                  | 10  | 12385 | 1.54 | 0.17 | 11 |
| 1 C37H5.8  | FEQIVGDLIK                     | 37  | 1132  | 1.55 | 0.11 | 7  |
| 1 C37H5.8  | VQATVQEIFGK                    | 45  | 784   | 1.56 | 0.09 | 6  |
| 22 C37H5.8 | FEQIVGDLIK                     | 35  | 2248  | 1.57 | 0.19 | 12 |
| 1 C37H5.8  | LITRNTTIPTK                    | 25  | 2089  | 1.60 | 0.06 | 4  |
| 1 C37H5.8  | RQAVTNSANTLFATK                | 54  | 8897  | 1.60 | 0.23 | 14 |
| 10 C37H5.8 | FEQIVGDLIK                     | 45  | 3513  | 1.60 | 0.05 | 3  |
| 10 C37H5.8 | EQQIVIQSSGGLSK                 | 98  | 5656  | 1.61 | 0.17 | 11 |
| 10 C37H5.8 | VQATVQEIFGK                    | 52  | 901   | 1.61 | 0.14 | 9  |
| 22 C37H5.8 | VYSPSQVGAFVLMK                 | 42  | 1951  | 1.61 | 0.11 | 7  |
| 22 C37H5.8 | RQAVTNSANTLFATK                | 83  | 2106  | 1.62 | 0.11 | 7  |
| 10 C37H5.8 | LITRNTTIPTK                    | 19  | 3215  | 1.62 | 0.21 | 13 |
| 1 C37H5.8  | RQAVTNSANTLFATK                | 43  | 987   | 1.65 | 0.07 | 4  |
| 1 C37H5.8  | VQATVQEIFGK                    | 66  | 884   | 1.65 | 0.16 | 9  |
| 22 C37H5.8 | FEQIVGDLIK                     | 42  | 1615  | 1.66 | 0.07 | 5  |
| 10 C37H5.8 | VYSPSQVGAFVLMK                 | 50  | 1542  | 1.66 | 0.15 | 9  |
| 10 C37H5.8 | VYSPSQVGAFVLMK                 | 33  | 1008  | 1.66 | 0.06 | 4  |
| 1 C37H5.8  | VQATVQEIFGK                    | 67  | 653   | 1.67 | 0.19 | 11 |
| 1 C37H5.8  | MTEFADQLPK                     | 26  | 2522  | 1.67 | 0.23 | 14 |
| 10 C37H5.8 | FEQIVGDLIK                     | 43  | 4039  | 1.67 | 0.08 | 5  |
| 1 C37H5.8  | VYSPSQVGAFVLMK                 | 14  | 1074  | 1.68 | 0.10 | 6  |
| 22 C37H5.8 | FEQIVGDLIK                     | 46  | 2328  | 1.68 | 0.13 | 8  |
| 22 C37H5.8 | VYSPSQVGAFVLMK                 | 32  | 1735  | 1.69 | 0.16 | 10 |
| 22 C37H5.8 | VQATVQEIFGK                    | 58  | 1563  | 1.69 | 0.09 | 5  |
| 22 C37H5.8 | VQATVQEIFGK                    | 56  | 1036  | 1.70 | 0.18 | 11 |
| 10 C37H5.8 | EQQIVIQSSGGLSK                 | 98  | 7129  | 1.71 | 0.12 | 7  |
| 10 C37H5.8 | SQVFSTAADGQTQVQIK              | 112 | 8088  | 1.73 | 0.09 | 5  |
| 22 C37H5.8 | LFEAAYK                        | 13  | 791   | 1.73 | 0.11 | 7  |
| 22 C37H5.8 | SSQIADVLLVGGMSRMPK             | 16  | 13984 | 1.73 | 0.12 | 7  |
| 22 C37H5.8 | MTEFADQLPK                     | 23  | 915   | 1.75 | 0.19 | 11 |
| 10 C37H5.8 | VFQGEREMATSNK                  | 21  | 807   | 1.75 | 0.08 | 5  |
| 22 C37H5.8 | LITRNTTIPTK                    | 15  | 5472  | 1.76 | 0.22 | 13 |
| 22 C37H5.8 | SQVFSTAADGQTQVQIK              | 108 | 6551  | 1.76 | 0.09 | 5  |
| 1 C37H5.8  | MTEFADQLPK                     | 14  | 878   | 1.77 | 0.21 | 12 |
| 10 C37H5.8 | FEQIVGDLIK                     | 19  | 1291  | 1.77 | 0.17 | 10 |
| 7 C37H5.8  | RQAVTNSANTLFATK                | 59  | 1539  | 1.80 | 0.12 | 7  |
| 22 C37H5.8 | LITRNTTIPTK                    | 22  | 4846  | 1.81 | 0.16 | 9  |
| 10 C37H5.8 | VFQGEREMATSNK                  | 29  | 5091  | 1.81 | 0.08 | 5  |
| 7 C37H5.8  | RQAVTNSANTLFATK                | 85  | 4095  | 1.81 | 0.20 | 11 |
| 10 C37H5.8 | VYSPSQVGAFVLMK                 | 47  | 1836  | 1.88 | 0.20 | 11 |
| 22 C37H5.8 | SQVFSTAADGQTQVQIK              | 112 | 6239  | 1.89 | 0.11 | 6  |
| 7 C37H5.8  | RQAVTNSANTLFATK                | 70  | 2694  | 1.90 | 0.16 | 8  |
| 1 C37H5.8  | RQAVTNSANTLFATK                | 22  | 4576  | 1.93 | 0.20 | 10 |
| 1 C37H5.8  | RQAVTNSANTLFATK                | 73  | 1788  | 1.93 | 0.46 | 24 |
| 22 C37H5.8 | VQATVQEIFGK                    | 63  | 937   | 1.94 | 0.18 | 9  |
| 22 C37H5.8 | FEQIVGDLIK                     | 49  | 1954  | 1.95 | 0.11 | 5  |
| 22 C37H5.8 | EQQIVIQSSGGLSK                 | 79  | 4127  | 1.96 | 0.09 | 5  |
| 7 C37H5.8  | VQATVQEIFGK                    | 58  | 2128  | 1.97 | 0.17 | 9  |
| 1 C37H5.8  | RQAVTNSANTLFATK                | 17  | 1961  | 1.97 | 0.18 | 9  |

|                                  |                       |    |       |      |      |     |
|----------------------------------|-----------------------|----|-------|------|------|-----|
| 22 C37H5.8                       | RQAVTNSANTLFATK       | 37 | 14224 | 1.98 | 0.18 | 9   |
| 22 C37H5.8                       | LITRNTTIPTK           | 27 | 4544  | 1.99 | 0.33 | 17  |
| 10 C37H5.8                       | RQAVTNSANTLFATK       | 49 | 1446  | 2.03 | 0.14 | 7   |
| 22 C37H5.8                       | RQAVTNSANTLFATK       | 81 | 8360  | 2.16 | 0.10 | 5   |
| 22 C37H5.8                       | RQAVTNSANTLFATK       | 64 | 5005  | 2.21 | 0.11 | 5   |
| 10 C37H5.8                       | LITRNTTIPTK           | 34 | 6774  | 2.22 | 0.19 | 8   |
| 10 C37H5.8                       | VFQGEREMATSNK         | 28 | 3845  | 2.26 | 0.12 | 5   |
| 22 C37H5.8                       | VQATVQEIFGK           | 63 | 1561  | 2.31 | 0.12 | 5   |
| 10 C37H5.8                       | HLNLK                 | 13 | 3980  | 2.39 | 0.04 | 2   |
| 1 C37H5.8                        | RQAVTNSANTLFATK       | 68 | 2574  | 2.43 | 0.11 | 5   |
| 22 C37H5.8                       | VQATVQEIFGK           | 64 | 1202  | 2.48 | 0.19 | 8   |
| 22 C37H5.8                       | VQATVQEIFGK           | 52 | 1481  | 2.49 | 0.14 | 6   |
| 10 C37H5.8                       | LITRNTTIPTK           | 45 | 5066  | 2.50 | 0.28 | 11  |
| 22 C37H5.8                       | VQATVQEIFGK           | 62 | 1092  | 2.53 | 0.10 | 4   |
| 10 C37H5.8                       | MTEFADQLPK            | 22 | 4220  | 2.54 | 0.09 | 4   |
| 10 C37H5.8                       | MTEFADQLPK            | 32 | 3772  | 2.71 | 0.09 | 3   |
| 1 C37H5.8                        | RQAVTNSANTLFATK       | 28 | 844   | 2.74 | 0.10 | 3   |
| 1 C37H5.8                        | RQAVTNSANTLFATK       | 95 | 2332  | 2.89 | 0.25 | 9   |
| 22 C37H5.8                       | RQAVTNSANTLFATK       | 40 | 13041 | 3.26 | 0.23 | 7   |
| 1 C37H5.8                        | RQAVTNSANTLFATK       | 53 | 2071  | 3.29 | 0.13 | 4   |
| 10 C37H5.8                       | VQATVQEIFGK           | 62 | 2172  | 3.43 | 0.17 | 5   |
| 22 C37H5.8                       | RQAVTNSANTLFATK       | 31 | 5840  | 3.71 | 0.10 | 3   |
| 10 C37H5.8                       | VQATVQEIFGK           | 46 | 1058  | 3.80 | 0.15 | 4   |
| 22 C37H5.8                       | RQAVTNSANTLFATK       | 77 | 7301  | 4.13 | 0.12 | 3   |
| 22 C37H5.8                       | RQAVTNSANTLFATK       | 78 | 5538  | 4.41 | 0.13 | 3   |
| 10 C37H5.8                       | RQAVTNSANTLFATK       | 71 | 4884  | 6.33 | 0.06 | 1   |
| 10 C37H5.8                       | RQAVTNSANTLFATK       | 83 | 8877  | 8.51 | 0.30 | 4   |
| 22 C38D4.3                       | IYYILDQ GK            | 11 | 566   | 0.74 | 0.15 | 20  |
| 22 C39F7.4                       | LLLIGDSGVGK           | 31 | 1383  | 0.52 | 0.22 | 42  |
| 22 C39F7.4                       | LLLIGDSGVGK           | 51 | 1587  | 0.57 | 0.24 | 42  |
| 22 C39F7.4                       | LLLIGDSGVGK           | 39 | 4035  | 0.69 | 0.13 | 18  |
| 22 C39F7.4                       | LLLIGDSGVGK           | 29 | 2652  | 0.73 | 0.11 | 15  |
| 22 C39F7.4                       | LLLIGDSGVGK           | 24 | 729   | 0.78 | 0.30 | 39  |
| 22 C39F7.4                       | LLLIGDSGVGK           | 29 | 1221  | 0.91 | 0.23 | 25  |
| 22 C39F7.4                       | LLLIGDSGVGK           | 66 | 2169  | 1.22 | 0.16 | 13  |
| 22 C39F7.4                       | LLLIGDSGVGK           | 56 | 2120  | 1.28 | 0.09 | 7   |
| 22 C39F7.4                       | SSTNVEQAFLTMASEIK     | 12 | 693   | 1.99 | 0.17 | 8   |
| 22 C39F7.4                       | LLLIGDSGVGK           | 61 | 3894  | 2.63 | 0.18 | 7   |
| 22 C39F7.4                       | LLLIGDSGVGK           | 45 | 2772  | 2.85 | 0.13 | 5   |
| 10 C41A3.1                       | QLQIAK                | 12 | 1923  | 1.14 | 0.13 | 11  |
| 10 C41A3.1                       | ASLGHGEASAGTCGLLK     | 11 | 9706  | 1.14 | 0.17 | 15  |
| 22 C41C4.8                       | MDELGLFRGDSVILK       | 25 | 1035  | 0.08 | 0.68 | 906 |
| 1 C41C4.8                        | RELQELVQYPVEHPEK      | 44 | 5663  | 0.44 | 0.10 | 23  |
| 1 C41C4.8                        | EMVELPLRHPQLFK        | 15 | 1789  | 0.46 | 0.23 | 50  |
| 1 C41C4.8                        | RELQELVQYPVEHPEK      | 18 | 4171  | 0.53 | 0.08 | 16  |
| 1 C41C4.8                        | RELQELVQYPVEHPEK      | 14 | 1349  | 0.56 | 0.18 | 31  |
| 1 C41C4.8                        | EMVELPLRHPQLFK        | 12 | 1984  | 0.56 | 0.10 | 18  |
| 1 C41C4.8                        | RELQELVQYPVEHPEK      | 25 | 4481  | 0.62 | 0.20 | 32  |
| 1 C41C4.8                        | RELQELVQYPVEHPEK      | 15 | 5856  | 0.62 | 0.17 | 27  |
| 1 C41C4.8                        | RELQELVQYPVEHPEK      | 35 | 5748  | 0.68 | 0.11 | 17  |
| 1 C41C4.8                        | RELQELVQYPVEHPEK      | 28 | 3116  | 0.72 | 0.13 | 18  |
| 1 C41C4.8                        | RELQELVQYPVEHPEK      | 24 | 1661  | 0.80 | 0.26 | 33  |
| 1 C41C4.8                        | EMVELPLRHPQLFK        | 15 | 6835  | 0.82 | 0.09 | 11  |
| 1 C41C4.8                        | RELQELVQYPVEHPEK      | 16 | 3015  | 0.84 | 0.14 | 17  |
| 1 C41C4.8                        | RELQELVQYPVEHPEK      | 24 | 3219  | 0.85 | 0.19 | 22  |
| 10 C41C4.8                       | TPLSADLDLNLFLAK       | 23 | 418   | 0.86 | 0.24 | 28  |
| 1 C41C4.8                        | RELQELVQYPVEHPEK      | 32 | 3176  | 0.99 | 0.10 | 10  |
| 1 C41C4.8                        | RELQELVQYPVEHPEK      | 20 | 2429  | 1.00 | 0.17 | 17  |
| 22 C41C4.8                       | TPLSADLDLNLFLAK       | 28 | 694   | 1.01 | 0.11 | 11  |
| 22 C41C4.8                       | NSPAILFIDEIDAIAPK     | 44 | 1657  | 1.04 | 0.19 | 18  |
| 1 C41C4.8                        | EMVELPLRHPQLFK        | 15 | 6842  | 1.10 | 0.40 | 36  |
| 1 C41C4.8                        | RELQELVQYPVEHPEK      | 45 | 9296  | 1.13 | 0.20 | 18  |
| 22 C41C4.8                       | NSPAILFIDEIDAIAPK     | 47 | 1614  | 1.14 | 0.17 | 15  |
| 1 C41C4.8                        | RELQELVQYPVEHPEK      | 21 | 6119  | 1.34 | 0.10 | 8   |
| 1 C41C4.8                        | RELQELVQYPVEHPEK      | 39 | 8687  | 1.37 | 0.14 | 10  |
| 22 C41C4.8                       | TPLSADLDLNLFLAK       | 32 | 604   | 1.43 | 0.23 | 16  |
| 1 C41C4.8                        | RELQELVQYPVEHPEK      | 49 | 4173  | 1.70 | 0.08 | 4   |
| 1 C41C4.8                        | RELQELVQYPVEHPEK      | 26 | 3272  | 2.18 | 0.23 | 10  |
| 1 C41C4.8                        | TPLSADLDLNLFLAK       | 67 | 694   | 3.57 | 0.16 | 4   |
| 1 C41D11.2                       | HILLDSLVMK            | 23 | 855   | 1.17 | 0.07 | 6   |
| 10 C41D11.2                      | MFIAEAVAEK            | 19 | 717   | 1.27 | 0.17 | 14  |
| 22 C41D11.2                      | MFIAEAVAEK            | 43 | 1416  | 1.27 | 0.12 | 9   |
| 22 C41D11.2                      | MFIAEAVAEK            | 38 | 1398  | 2.30 | 0.16 | 7   |
| 10 C41D11.2                      | HILLDSLVMK            | 23 | 1108  | 3.39 | 0.11 | 3   |
| 10 C41D11.2                      | HILLDSLVMK            | 71 | 2312  | 4.03 | 0.13 | 3   |
| 22 C42C1.11a;C42C1.11c           | LAVLDAVRVNK           | 32 | 2142  | 1.02 | 0.10 | 10  |
| 10 C42C1.11a;C42C1.11c;C42C1.11b | LAVLDAVRVNK           | 49 | 2887  | 0.85 | 0.07 | 8   |
| 10 C42C1.11a;C42C1.11c;C42C1.11b | LAVLDAVRVNK           | 23 | 1901  | 0.94 | 0.08 | 8   |
| 10 C42C1.5                       | YGVVVFDDQDK           | 29 | 1432  | 0.85 | 0.19 | 23  |
| 1 C42D8.2a;C42D8.2b              | AEFAPFEK              | 16 | 3076  | 0.08 | 0.14 | 183 |
| 1 C42D8.2a;C42D8.2b              | AEFAPFEK              | 16 | 2804  | 0.10 | 0.34 | 351 |
| 22 C42D8.2a;C42D8.2b             | EFELEQENTESRREYFNK    | 14 | 3096  | 0.12 | 0.52 | 419 |
| 22 C42D8.2a;C42D8.2b             | LVLEENHSIK            | 43 | 1849  | 0.19 | 0.14 | 72  |
| 10 C42D8.2a;C42D8.2b             | DTELIRPQTVYTYVLENEELK | 40 | 1741  | 0.19 | 0.13 | 66  |
| 22 C42D8.2a;C42D8.2b             | MHLIK                 | 16 | 3556  | 0.20 | 0.23 | 117 |
| 22 C42D8.2a;C42D8.2b             | RNFEIVYK              | 23 | 3989  | 0.22 | 0.06 | 28  |
| 1 C42D8.2a;C42D8.2b              | LVLEENHSIK            | 27 | 1194  | 0.23 | 0.16 | 69  |
| 10 C42D8.2a;C42D8.2b             | IQAVAGMK              | 26 | 1405  | 0.24 | 0.17 | 69  |
| 22 C42D8.2a;C42D8.2b             | AEFAPFEK              | 16 | 4234  | 0.24 | 0.15 | 61  |
| 1 C42D8.2a;C42D8.2b              | AEFAPFEK              | 26 | 2746  | 0.25 | 0.16 | 65  |
| 22 C42D8.2a;C42D8.2b             | EAIDALRLLK            | 26 | 2703  | 0.25 | 0.12 | 49  |
| 10 C42D8.2a;C42D8.2b             | IQSLMEHALAIAGTK       | 64 | 1481  | 0.25 | 0.26 | 103 |
| 22 C42D8.2a;C42D8.2b             | MHLIK                 | 15 | 2346  | 0.26 | 0.12 | 45  |
| 10 C42D8.2a;C42D8.2b             | SINFDK                | 16 | 3075  | 0.27 | 0.46 | 171 |
| 10 C42D8.2a;C42D8.2b             | SINFDK                | 29 | 3936  | 0.27 | 0.28 | 102 |
| 22 C42D8.2a;C42D8.2b             | RNFEIVYK              | 32 | 3350  | 0.27 | 0.07 | 25  |
| 10 C42D8.2a;C42D8.2b             | RAVVNMISFNPIAPRNEIEK  | 36 | 1425  | 0.28 | 0.23 | 80  |
| 10 C42D8.2a;C42D8.2b             | IQAVAGMK              | 62 | 4830  | 0.28 | 0.08 | 28  |
| 22 C42D8.2a;C42D8.2b             | FAESRVAK              | 15 | 4259  | 0.29 | 0.45 | 156 |
| 22 C42D8.2a;C42D8.2b             | MHLIK                 | 17 | 5983  | 0.29 | 0.12 | 43  |
| 1 C42D8.2a;C42D8.2b              | LVLEENHSIK            | 25 | 1147  | 0.30 | 0.22 | 73  |

|                      |                       |    |       |      |      |     |
|----------------------|-----------------------|----|-------|------|------|-----|
| 10 C42D8.2a;C42D8.2b | IQSLMEHALAIAGTK       | 37 | 1610  | 0.30 | 0.09 | 32  |
| 22 C42D8.2a;C42D8.2b | MHLIK                 | 18 | 6589  | 0.30 | 0.08 | 26  |
| 22 C42D8.2a;C42D8.2b | EAIDALRLLK            | 16 | 1326  | 0.30 | 0.07 | 22  |
| 10 C42D8.2a;C42D8.2b | EFELEQENTESRREYFNK    | 12 | 1328  | 0.30 | 0.11 | 35  |
| 22 C42D8.2a;C42D8.2b | IQAVAGMK              | 34 | 3251  | 0.31 | 0.35 | 114 |
| 22 C42D8.2a;C42D8.2b | SVQSVRAYTPIK          | 34 | 8519  | 0.31 | 0.15 | 47  |
| 22 C42D8.2a;C42D8.2b | EAIDALRLLK            | 22 | 1950  | 0.32 | 0.16 | 49  |
| 10 C42D8.2a;C42D8.2b | IQSLMEHALAIAGTK       | 72 | 1450  | 0.32 | 0.15 | 49  |
| 22 C42D8.2a;C42D8.2b | LVLEENHSIK            | 29 | 3414  | 0.32 | 0.12 | 38  |
| 22 C42D8.2a;C42D8.2b | AARLNQINAVAeyK        | 45 | 3912  | 0.32 | 0.14 | 44  |
| 10 C42D8.2a;C42D8.2b | IQAVAGMK              | 68 | 6187  | 0.32 | 0.05 | 16  |
| 22 C42D8.2a;C42D8.2b | SVQSVRAYTPIK          | 17 | 1401  | 0.32 | 0.26 | 78  |
| 10 C42D8.2a;C42D8.2b | IQAVAGMK              | 31 | 1659  | 0.33 | 0.10 | 30  |
| 22 C42D8.2a;C42D8.2b | SVQSVRAYTPIK          | 42 | 9477  | 0.33 | 0.10 | 30  |
| 1 C42D8.2a;C42D8.2b  | YVQMALEK              | 18 | 805   | 0.33 | 0.12 | 35  |
| 10 C42D8.2a;C42D8.2b | VLLPIYK               | 18 | 1800  | 0.33 | 0.11 | 34  |
| 1 C42D8.2a;C42D8.2b  | EAIDALRLLK            | 38 | 2653  | 0.33 | 0.15 | 45  |
| 22 C42D8.2a;C42D8.2b | AEFAPFEK              | 20 | 6396  | 0.34 | 0.17 | 52  |
| 22 C42D8.2a;C42D8.2b | EAIDALRLLK            | 13 | 2128  | 0.34 | 0.12 | 35  |
| 7 C42D8.2a;C42D8.2b  | AEFAPFEK              | 14 | 5058  | 0.34 | 0.29 | 85  |
| 10 C42D8.2a;C42D8.2b | EEQSEENTSFFTNEK       | 77 | 1018  | 0.34 | 0.23 | 68  |
| 22 C42D8.2a;C42D8.2b | LVLEENHSIK            | 62 | 15367 | 0.34 | 0.10 | 30  |
| 7 C42D8.2a;C42D8.2b  | RNFEIVYK              | 41 | 3814  | 0.34 | 0.11 | 31  |
| 22 C42D8.2a;C42D8.2b | AARLNQINAVAeyK        | 50 | 2757  | 0.35 | 0.16 | 46  |
| 1 C42D8.2a;C42D8.2b  | LVLEENHSIK            | 18 | 876   | 0.35 | 0.23 | 67  |
| 22 C42D8.2a;C42D8.2b | MHLIK                 | 31 | 13189 | 0.35 | 0.06 | 17  |
| 7 C42D8.2a;C42D8.2b  | EAIDALRLLK            | 33 | 2953  | 0.35 | 0.11 | 32  |
| 22 C42D8.2a;C42D8.2b | AEFAPFEK              | 17 | 5535  | 0.35 | 0.10 | 28  |
| 10 C42D8.2a;C42D8.2b | EEQSEENTSFFTNEK       | 65 | 1430  | 0.36 | 0.11 | 30  |
| 7 C42D8.2a;C42D8.2b  | RNFEIVYK              | 53 | 7104  | 0.36 | 0.09 | 27  |
| 10 C42D8.2a;C42D8.2b | DTEIIRPQTVYTYVLENEELK | 22 | 1484  | 0.36 | 0.45 | 126 |
| 10 C42D8.2a;C42D8.2b | FPTTLGLPLTISGK        | 12 | 1006  | 0.36 | 0.22 | 60  |
| 1 C42D8.2a;C42D8.2b  | LVLEENHSIK            | 49 | 8542  | 0.36 | 0.12 | 33  |
| 1 C42D8.2a;C42D8.2b  | YVQMALEK              | 27 | 1012  | 0.36 | 0.10 | 27  |
| 10 C42D8.2a;C42D8.2b | LVLEENHSIK            | 21 | 4418  | 0.37 | 0.12 | 33  |
| 1 C42D8.2a;C42D8.2b  | EIHETLYVK             | 18 | 1100  | 0.37 | 0.15 | 40  |
| 10 C42D8.2a;C42D8.2b | EAIDALRLLK            | 24 | 3557  | 0.37 | 0.18 | 49  |
| 22 C42D8.2a;C42D8.2b | EIHETLYVK             | 24 | 5578  | 0.37 | 0.22 | 58  |
| 7 C42D8.2a;C42D8.2b  | VLLPIYK               | 14 | 2130  | 0.37 | 0.10 | 27  |
| 22 C42D8.2a;C42D8.2b | YFAQIGFSQQHMDK        | 31 | 1273  | 0.37 | 0.16 | 44  |
| 22 C42D8.2a;C42D8.2b | EEQSEENTSFFTNEK       | 81 | 1561  | 0.37 | 0.15 | 40  |
| 22 C42D8.2a;C42D8.2b | ESEVRSLYTVNVNGQEVmk   | 32 | 3602  | 0.37 | 0.10 | 27  |
| 10 C42D8.2a;C42D8.2b | SINFDK                | 17 | 2340  | 0.37 | 0.53 | 142 |
| 10 C42D8.2a;C42D8.2b | IQAVAGMK              | 24 | 3458  | 0.38 | 0.51 | 134 |
| 1 C42D8.2a;C42D8.2b  | LVLEENHSIK            | 40 | 7541  | 0.38 | 0.08 | 22  |
| 22 C42D8.2a;C42D8.2b | AEFAPFEK              | 17 | 4713  | 0.38 | 0.15 | 38  |
| 10 C42D8.2a;C42D8.2b | ESEVRSLYTVNVNGQEVmk   | 37 | 6434  | 0.38 | 0.21 | 55  |
| 10 C42D8.2a;C42D8.2b | TIQETPFPSQSIAEALIK    | 34 | 1162  | 0.39 | 0.28 | 73  |
| 1 C42D8.2a;C42D8.2b  | LVLEENHSIK            | 32 | 1108  | 0.39 | 0.15 | 38  |
| 10 C42D8.2a;C42D8.2b | EAIDALRLLK            | 19 | 2394  | 0.39 | 0.14 | 36  |
| 10 C42D8.2a;C42D8.2b | ESEVRSLYTVNVNGQEVmk   | 50 | 7982  | 0.39 | 0.09 | 23  |
| 1 C42D8.2a;C42D8.2b  | YFAQIGFSQQHMDK        | 12 | 1361  | 0.39 | 0.07 | 19  |
| 1 C42D8.2a;C42D8.2b  | LVLEENHSIK            | 13 | 703   | 0.39 | 0.23 | 60  |
| 22 C42D8.2a;C42D8.2b | LVLEENHSIK            | 30 | 7797  | 0.39 | 0.07 | 18  |
| 22 C42D8.2a;C42D8.2b | VLLPIYK               | 15 | 5903  | 0.39 | 0.07 | 19  |
| 22 C42D8.2a;C42D8.2b | VLLPIYK               | 18 | 5805  | 0.40 | 0.09 | 23  |
| 1 C42D8.2a;C42D8.2b  | YVQMALEK              | 24 | 974   | 0.40 | 0.22 | 56  |
| 22 C42D8.2a;C42D8.2b | YFAQIGFSQQHMDK        | 45 | 2245  | 0.40 | 0.16 | 39  |
| 22 C42D8.2a;C42D8.2b | EIHETLYVK             | 28 | 7459  | 0.40 | 0.17 | 41  |
| 22 C42D8.2a;C42D8.2b | EAIDALRLLK            | 25 | 2054  | 0.40 | 0.19 | 48  |
| 10 C42D8.2a;C42D8.2b | FPTTLGLPLTISGK        | 15 | 914   | 0.40 | 0.34 | 84  |
| 22 C42D8.2a;C42D8.2b | EIHETLYVK             | 37 | 21145 | 0.40 | 0.21 | 53  |
| 1 C42D8.2a;C42D8.2b  | EAIDALRLLK            | 10 | 670   | 0.40 | 0.09 | 22  |
| 10 C42D8.2a;C42D8.2b | LVLEENHSIK            | 58 | 17625 | 0.40 | 0.16 | 41  |
| 1 C42D8.2a;C42D8.2b  | TIQETPFPSQSIAEALIK    | 36 | 1303  | 0.40 | 0.22 | 54  |
| 22 C42D8.2a;C42D8.2b | EAIDALRLLK            | 24 | 844   | 0.41 | 0.18 | 44  |
| 7 C42D8.2a;C42D8.2b  | EAIDALRLLK            | 29 | 2944  | 0.41 | 0.12 | 29  |
| 10 C42D8.2a;C42D8.2b | LVLEENHSIK            | 31 | 2582  | 0.41 | 0.10 | 25  |
| 7 C42D8.2a;C42D8.2b  | VLLPIYK               | 14 | 1927  | 0.41 | 0.08 | 20  |
| 22 C42D8.2a;C42D8.2b | MHLIK                 | 17 | 17630 | 0.41 | 0.04 | 9   |
| 1 C42D8.2a;C42D8.2b  | SVQSVRAYTPIK          | 18 | 654   | 0.41 | 0.01 | 3   |
| 22 C42D8.2a;C42D8.2b | EIHETLYVK             | 46 | 16254 | 0.42 | 0.11 | 26  |
| 1 C42D8.2a;C42D8.2b  | MHLIK                 | 15 | 4114  | 0.42 | 0.17 | 39  |
| 22 C42D8.2a;C42D8.2b | AARLNQINAVAeyK        | 38 | 2965  | 0.42 | 0.07 | 16  |
| 10 C42D8.2a;C42D8.2b | NVQVPRVYLPSIAQRSVK    | 11 | 2619  | 0.42 | 0.27 | 65  |
| 1 C42D8.2a;C42D8.2b  | ESEVRSLYTVNVNGQEVmk   | 14 | 2262  | 0.42 | 0.07 | 16  |
| 1 C42D8.2a;C42D8.2b  | MHLIK                 | 15 | 4107  | 0.42 | 0.11 | 27  |
| 7 C42D8.2a;C42D8.2b  | AEFAPFEK              | 13 | 3744  | 0.43 | 0.16 | 38  |
| 22 C42D8.2a;C42D8.2b | YVQMALEK              | 50 | 3063  | 0.43 | 0.11 | 26  |
| 7 C42D8.2a;C42D8.2b  | TIQETPFPSQSIAEALIK    | 33 | 1982  | 0.43 | 0.12 | 27  |
| 22 C42D8.2a;C42D8.2b | IQAVAGMK              | 34 | 2054  | 0.43 | 0.33 | 77  |
| 1 C42D8.2a;C42D8.2b  | RNFEIVYK              | 31 | 931   | 0.43 | 0.17 | 40  |
| 22 C42D8.2a;C42D8.2b | RNFEIVYK              | 20 | 7450  | 0.43 | 0.07 | 16  |
| 10 C42D8.2a;C42D8.2b | EAIDALRLLK            | 21 | 2908  | 0.43 | 0.09 | 20  |
| 10 C42D8.2a;C42D8.2b | EAIDALRLLK            | 21 | 2607  | 0.43 | 0.21 | 48  |
| 1 C42D8.2a;C42D8.2b  | SVQSVRAYTPIK          | 23 | 1881  | 0.43 | 0.39 | 91  |
| 10 C42D8.2a;C42D8.2b | LVLEENHSIK            | 33 | 3524  | 0.43 | 0.14 | 33  |
| 22 C42D8.2a;C42D8.2b | MHLIK                 | 11 | 1836  | 0.44 | 0.19 | 44  |
| 22 C42D8.2a;C42D8.2b | YVQMALEK              | 64 | 6180  | 0.44 | 0.14 | 31  |
| 22 C42D8.2a;C42D8.2b | RAVVNMISFNPIAPRNEIEK  | 12 | 725   | 0.44 | 0.13 | 29  |
| 10 C42D8.2a;C42D8.2b | LVLEENHSIK            | 43 | 18876 | 0.44 | 0.11 | 24  |
| 1 C42D8.2a;C42D8.2b  | YVQMALEK              | 10 | 300   | 0.44 | 0.16 | 36  |
| 1 C42D8.2a;C42D8.2b  | EIHETLYVK             | 15 | 687   | 0.44 | 0.21 | 47  |
| 10 C42D8.2a;C42D8.2b | SINFDK                | 16 | 2570  | 0.44 | 0.25 | 57  |
| 22 C42D8.2a;C42D8.2b | RNFEIVYK              | 17 | 5195  | 0.45 | 0.07 | 16  |
| 1 C42D8.2a;C42D8.2b  | TQLPSYSRK             | 10 | 1526  | 0.45 | 0.09 | 20  |
| 22 C42D8.2a;C42D8.2b | EAIDALRLLK            | 12 | 807   | 0.45 | 0.08 | 18  |
| 1 C42D8.2a;C42D8.2b  | YFAQIGFSQQHMDK        | 37 | 875   | 0.45 | 0.07 | 16  |
| 1 C42D8.2a;C42D8.2b  | EAIDALRLLK            | 36 | 2590  | 0.45 | 0.12 | 27  |
| 10 C42D8.2a;C42D8.2b | IQSLMEHALAIAGTK       | 30 | 1827  | 0.45 | 0.09 | 19  |
| 10 C42D8.2a;C42D8.2b | FLRVFMQQYK            | 17 | 1158  | 0.45 | 0.40 | 87  |

|                      |                       |    |       |      |      |    |
|----------------------|-----------------------|----|-------|------|------|----|
| 10 C42D8.2a;C42D8.2b | AEFAPFEK              | 26 | 4607  | 0.46 | 0.04 | 9  |
| 22 C42D8.2a;C42D8.2b | YFAQIGFSQQHMDK        | 54 | 1507  | 0.46 | 0.16 | 34 |
| 22 C42D8.2a;C42D8.2b | YVQMALEK              | 61 | 5444  | 0.46 | 0.06 | 13 |
| 10 C42D8.2a;C42D8.2b | AEFAPFEK              | 32 | 5809  | 0.46 | 0.25 | 55 |
| 22 C42D8.2a;C42D8.2b | YVQMALEK              | 48 | 3404  | 0.46 | 0.15 | 32 |
| 10 C42D8.2a;C42D8.2b | AARLNQINAVAEYK        | 44 | 5207  | 0.47 | 0.11 | 23 |
| 10 C42D8.2a;C42D8.2b | LVLEENHSIK            | 56 | 6801  | 0.47 | 0.10 | 21 |
| 22 C42D8.2a;C42D8.2b | YVQMALEK              | 41 | 1602  | 0.47 | 0.26 | 55 |
| 10 C42D8.2a;C42D8.2b | FPLDK                 | 15 | 5919  | 0.47 | 0.04 | 8  |
| 1 C42D8.2a;C42D8.2b  | IQAVAGMK              | 11 | 517   | 0.47 | 0.18 | 38 |
| 22 C42D8.2a;C42D8.2b | EAIDALRLLK            | 21 | 2414  | 0.47 | 0.07 | 14 |
| 1 C42D8.2a;C42D8.2b  | YVQMALEK              | 45 | 1377  | 0.47 | 0.17 | 35 |
| 10 C42D8.2a;C42D8.2b | VLLPIYK               | 14 | 1964  | 0.47 | 0.21 | 43 |
| 22 C42D8.2a;C42D8.2b | EAIDALRLLK            | 17 | 2644  | 0.48 | 0.19 | 39 |
| 22 C42D8.2a;C42D8.2b | TIQETPFPSQSIAEALIK    | 37 | 2713  | 0.48 | 0.14 | 29 |
| 22 C42D8.2a;C42D8.2b | TELSQIK               | 41 | 3545  | 0.48 | 0.18 | 39 |
| 1 C42D8.2a;C42D8.2b  | YFAQIGFSQQHMDK        | 42 | 1733  | 0.48 | 0.15 | 30 |
| 1 C42D8.2a;C42D8.2b  | IQAVAGMK              | 20 | 1655  | 0.48 | 0.43 | 88 |
| 7 C42D8.2a;C42D8.2b  | EAIDALRLLK            | 13 | 2220  | 0.48 | 0.11 | 23 |
| 10 C42D8.2a;C42D8.2b | EIHETLYVK             | 21 | 2805  | 0.48 | 0.10 | 20 |
| 22 C42D8.2a;C42D8.2b | VLLPIYK               | 16 | 4299  | 0.48 | 0.10 | 20 |
| 1 C42D8.2a;C42D8.2b  | TELSQIK               | 33 | 1604  | 0.49 | 0.09 | 19 |
| 1 C42D8.2a;C42D8.2b  | YVQMALEK              | 13 | 1154  | 0.49 | 0.11 | 23 |
| 10 C42D8.2a;C42D8.2b | EAIDALRLLK            | 32 | 5896  | 0.49 | 0.05 | 10 |
| 10 C42D8.2a;C42D8.2b | FLRVFMQQYK            | 15 | 1038  | 0.49 | 0.19 | 38 |
| 22 C42D8.2a;C42D8.2b | YVQMALEK              | 25 | 1558  | 0.49 | 0.12 | 25 |
| 10 C42D8.2a;C42D8.2b | AARLNQINAVAEYK        | 24 | 3439  | 0.49 | 0.10 | 21 |
| 22 C42D8.2a;C42D8.2b | AARLNQINAVAEYK        | 23 | 6576  | 0.49 | 0.25 | 51 |
| 22 C42D8.2a;C42D8.2b | EIHETLYVK             | 47 | 22856 | 0.49 | 0.18 | 36 |
| 22 C42D8.2a;C42D8.2b | LVLEENHSIK            | 20 | 3557  | 0.49 | 0.18 | 36 |
| 22 C42D8.2a;C42D8.2b | YFAQIGFSQQHMDK        | 60 | 1997  | 0.50 | 0.16 | 33 |
| 1 C42D8.2a;C42D8.2b  | MHLIK                 | 15 | 3149  | 0.50 | 0.16 | 31 |
| 10 C42D8.2a;C42D8.2b | TIQETPFPSQSIAEALIK    | 42 | 2443  | 0.50 | 0.17 | 35 |
| 10 C42D8.2a;C42D8.2b | IQSLMEHALAIAGTK       | 51 | 1336  | 0.50 | 0.11 | 21 |
| 1 C42D8.2a;C42D8.2b  | EIHETLYVK             | 10 | 2496  | 0.50 | 0.20 | 40 |
| 1 C42D8.2a;C42D8.2b  | EAIDALRLLK            | 23 | 969   | 0.50 | 0.18 | 36 |
| 10 C42D8.2a;C42D8.2b | LVLEENHSIK            | 56 | 7038  | 0.50 | 0.08 | 17 |
| 7 C42D8.2a;C42D8.2b  | YFAQIGFSQQHMDK        | 33 | 1904  | 0.50 | 0.12 | 23 |
| 1 C42D8.2a;C42D8.2b  | EIHETLYVK             | 26 | 3559  | 0.50 | 0.15 | 29 |
| 1 C42D8.2a;C42D8.2b  | SVQSVRAYTPIK          | 21 | 1187  | 0.50 | 0.27 | 54 |
| 22 C42D8.2a;C42D8.2b | YFAQIGFSQQHMDK        | 17 | 2538  | 0.50 | 0.21 | 41 |
| 22 C42D8.2a;C42D8.2b | AEFAPFEK              | 32 | 5683  | 0.51 | 0.12 | 24 |
| 10 C42D8.2a;C42D8.2b | TIQETPFPSQSIAEALIK    | 31 | 983   | 0.51 | 0.15 | 29 |
| 1 C42D8.2a;C42D8.2b  | MHLIK                 | 15 | 3076  | 0.51 | 0.16 | 31 |
| 1 C42D8.2a;C42D8.2b  | TELSQIK               | 18 | 1154  | 0.51 | 0.15 | 30 |
| 1 C42D8.2a;C42D8.2b  | EIHETLYVK             | 55 | 7003  | 0.51 | 0.12 | 23 |
| 22 C42D8.2a;C42D8.2b | LVLEENHSIK            | 37 | 3138  | 0.51 | 0.11 | 21 |
| 22 C42D8.2a;C42D8.2b | DTELIRPQTVYTYVLENEELK | 50 | 2270  | 0.51 | 0.36 | 70 |
| 10 C42D8.2a;C42D8.2b | RNFEIVYK              | 21 | 1746  | 0.51 | 0.13 | 26 |
| 22 C42D8.2a;C42D8.2b | MHLIK                 | 16 | 1947  | 0.52 | 0.14 | 27 |
| 10 C42D8.2a;C42D8.2b | AEFAPFEK              | 20 | 4579  | 0.52 | 0.15 | 28 |
| 1 C42D8.2a;C42D8.2b  | EAIDALRLLK            | 22 | 1354  | 0.52 | 0.07 | 14 |
| 22 C42D8.2a;C42D8.2b | EAIDALRLLK            | 44 | 4840  | 0.52 | 0.09 | 18 |
| 22 C42D8.2a;C42D8.2b | AARLNQINAVAEYK        | 29 | 2843  | 0.52 | 0.10 | 20 |
| 7 C42D8.2a;C42D8.2b  | EAIDALRLLK            | 30 | 2712  | 0.52 | 0.28 | 54 |
| 22 C42D8.2a;C42D8.2b | ESEVRSLYTVNVNGQEVMK   | 44 | 9389  | 0.52 | 0.09 | 16 |
| 22 C42D8.2a;C42D8.2b | YFAQIGFSQQHMDK        | 54 | 2387  | 0.52 | 0.29 | 55 |
| 1 C42D8.2a;C42D8.2b  | TELSQIK               | 22 | 1567  | 0.52 | 0.17 | 32 |
| 22 C42D8.2a;C42D8.2b | LVLEENHSIK            | 52 | 3754  | 0.52 | 0.12 | 24 |
| 10 C42D8.2a;C42D8.2b | AARLNQINAVAEYK        | 37 | 1518  | 0.52 | 0.19 | 36 |
| 1 C42D8.2a;C42D8.2b  | YVQMALEK              | 35 | 1340  | 0.52 | 0.13 | 25 |
| 7 C42D8.2a;C42D8.2b  | YVQMALEK              | 15 | 1823  | 0.52 | 0.13 | 24 |
| 7 C42D8.2a;C42D8.2b  | AEFAPFEK              | 13 | 3858  | 0.53 | 0.27 | 51 |
| 7 C42D8.2a;C42D8.2b  | TIQETPFPSQSIAEALIK    | 60 | 3276  | 0.53 | 0.16 | 30 |
| 22 C42D8.2a;C42D8.2b | YVQMALEK              | 34 | 2323  | 0.53 | 0.17 | 32 |
| 10 C42D8.2a;C42D8.2b | EIHETLYVK             | 29 | 11072 | 0.53 | 0.13 | 25 |
| 22 C42D8.2a;C42D8.2b | YVQMALEK              | 34 | 1102  | 0.53 | 0.16 | 29 |
| 22 C42D8.2a;C42D8.2b | MHLIK                 | 16 | 3588  | 0.53 | 0.08 | 16 |
| 10 C42D8.2a;C42D8.2b | TIQETPFPSQSIAEALIK    | 31 | 2110  | 0.53 | 0.21 | 40 |
| 10 C42D8.2a;C42D8.2b | EAIDALRLLK            | 17 | 1507  | 0.53 | 0.22 | 41 |
| 22 C42D8.2a;C42D8.2b | NVQVPRVYLPシアQRSVK     | 12 | 2858  | 0.53 | 0.36 | 67 |
| 1 C42D8.2a;C42D8.2b  | EIHETLYVK             | 47 | 5696  | 0.53 | 0.10 | 19 |
| 22 C42D8.2a;C42D8.2b | TIQETPFPSQSIAEALIK    | 77 | 4833  | 0.54 | 0.14 | 26 |
| 22 C42D8.2a;C42D8.2b | AARLNQINAVAEYK        | 31 | 3112  | 0.54 | 0.19 | 35 |
| 10 C42D8.2a;C42D8.2b | EAIDALRLLK            | 40 | 7681  | 0.54 | 0.13 | 24 |
| 7 C42D8.2a;C42D8.2b  | YVQMALEK              | 17 | 1799  | 0.54 | 0.15 | 28 |
| 10 C42D8.2a;C42D8.2b | FLRVFMQQYK            | 24 | 1068  | 0.54 | 0.23 | 43 |
| 22 C42D8.2a;C42D8.2b | LVLEENHSIK            | 58 | 22944 | 0.54 | 0.10 | 18 |
| 10 C42D8.2a;C42D8.2b | TIQETPFPSQSIAEALIK    | 40 | 1971  | 0.54 | 0.19 | 35 |
| 22 C42D8.2a;C42D8.2b | YFAQIGFSQQHMDK        | 69 | 2856  | 0.55 | 0.24 | 44 |
| 1 C42D8.2a;C42D8.2b  | TIQETPFPSQSIAEALIK    | 60 | 2340  | 0.55 | 0.13 | 24 |
| 22 C42D8.2a;C42D8.2b | YFAQIGFSQQHMDK        | 28 | 2337  | 0.55 | 0.18 | 32 |
| 22 C42D8.2a;C42D8.2b | EFELEQENTESRREYFNK    | 14 | 2180  | 0.55 | 0.09 | 16 |
| 10 C42D8.2a;C42D8.2b | EAIDALRLLK            | 12 | 974   | 0.55 | 0.17 | 31 |
| 1 C42D8.2a;C42D8.2b  | TIQETPFPSQSIAEALIK    | 34 | 1009  | 0.55 | 0.15 | 27 |
| 7 C42D8.2a;C42D8.2b  | TIQETPFPSQSIAEALIK    | 52 | 3971  | 0.55 | 0.19 | 34 |
| 10 C42D8.2a;C42D8.2b | TIQETPFPSQSIAEALIK    | 36 | 2732  | 0.55 | 0.12 | 21 |
| 22 C42D8.2a;C42D8.2b | DTELIRPQTVYTYVLENEELK | 48 | 2066  | 0.55 | 0.28 | 51 |
| 22 C42D8.2a;C42D8.2b | YFAQIGFSQQHMDK        | 55 | 1841  | 0.55 | 0.17 | 31 |
| 22 C42D8.2a;C42D8.2b | VLLPIYK               | 19 | 5279  | 0.55 | 0.12 | 22 |
| 10 C42D8.2a;C42D8.2b | LVLEENHSIK            | 12 | 3122  | 0.56 | 0.27 | 48 |
| 22 C42D8.2a;C42D8.2b | RNFEIVYK              | 24 | 1886  | 0.56 | 0.15 | 27 |
| 10 C42D8.2a;C42D8.2b | EIHETLYVK             | 46 | 17985 | 0.56 | 0.13 | 23 |
| 10 C42D8.2a;C42D8.2b | LVLEENHSIK            | 48 | 1898  | 0.56 | 0.10 | 18 |
| 10 C42D8.2a;C42D8.2b | TELSQIK               | 32 | 2618  | 0.56 | 0.12 | 21 |
| 10 C42D8.2a;C42D8.2b | EIHETLYVK             | 48 | 17312 | 0.56 | 0.14 | 25 |
| 7 C42D8.2a;C42D8.2b  | TIQETPFPSQSIAEALIK    | 39 | 2346  | 0.56 | 0.21 | 37 |
| 1 C42D8.2a;C42D8.2b  | MHLIK                 | 14 | 2886  | 0.56 | 0.13 | 23 |
| 1 C42D8.2a;C42D8.2b  | YFAQIGFSQQHMDK        | 19 | 1707  | 0.56 | 0.16 | 28 |
| 10 C42D8.2a;C42D8.2b | VLLPIYK               | 21 | 1781  | 0.57 | 0.08 | 15 |
| 10 C42D8.2a;C42D8.2b | TIQETPFPSQSIAEALIK    | 56 | 2069  | 0.57 | 0.19 | 33 |

|                      |                       |    |       |      |      |    |
|----------------------|-----------------------|----|-------|------|------|----|
| 1 C42D8.2a;C42D8.2b  | YFAQIGFSQQHMDK        | 31 | 1515  | 0.57 | 0.26 | 46 |
| 22 C42D8.2a;C42D8.2b | YVQMALEK              | 29 | 1948  | 0.57 | 0.17 | 29 |
| 7 C42D8.2a;C42D8.2b  | TELSQIK               | 19 | 1069  | 0.57 | 0.37 | 66 |
| 1 C42D8.2a;C42D8.2b  | RNFEIVYK              | 19 | 640   | 0.57 | 0.24 | 42 |
| 22 C42D8.2a;C42D8.2b | EIHETLYVK             | 36 | 20508 | 0.57 | 0.20 | 34 |
| 10 C42D8.2a;C42D8.2b | TELSQIK               | 44 | 3635  | 0.57 | 0.10 | 18 |
| 10 C42D8.2a;C42D8.2b | TIQETPFPSQSIAEALIK    | 28 | 1940  | 0.57 | 0.10 | 18 |
| 1 C42D8.2a;C42D8.2b  | EAIDALRLLK            | 31 | 1157  | 0.57 | 0.20 | 36 |
| 1 C42D8.2a;C42D8.2b  | YVQMALEK              | 16 | 718   | 0.57 | 0.10 | 18 |
| 1 C42D8.2a;C42D8.2b  | MHLIK                 | 13 | 1203  | 0.57 | 0.13 | 22 |
| 22 C42D8.2a;C42D8.2b | AEFAPFEK              | 20 | 5447  | 0.57 | 0.20 | 34 |
| 22 C42D8.2a;C42D8.2b | YFAQIGFSQQHMDK        | 11 | 4598  | 0.57 | 0.23 | 40 |
| 7 C42D8.2a;C42D8.2b  | FAESRVAK              | 17 | 1834  | 0.58 | 0.10 | 17 |
| 10 C42D8.2a;C42D8.2b | EAIDALRLLK            | 20 | 1899  | 0.58 | 0.18 | 31 |
| 10 C42D8.2a;C42D8.2b | TELSQIK               | 47 | 4664  | 0.58 | 0.09 | 16 |
| 10 C42D8.2a;C42D8.2b | RNFEIVYK              | 40 | 6597  | 0.58 | 0.17 | 30 |
| 22 C42D8.2a;C42D8.2b | YVQMALEK              | 45 | 4354  | 0.58 | 0.13 | 23 |
| 7 C42D8.2a;C42D8.2b  | RNFEIVYK              | 10 | 2275  | 0.58 | 0.15 | 26 |
| 1 C42D8.2a;C42D8.2b  | SVQSVRAYTPIK          | 19 | 919   | 0.58 | 0.08 | 13 |
| 22 C42D8.2a;C42D8.2b | IQSLMEHALAIAGTK       | 46 | 550   | 0.58 | 0.26 | 45 |
| 10 C42D8.2a;C42D8.2b | IQSLMEHALAIAGTK       | 44 | 824   | 0.58 | 0.19 | 33 |
| 22 C42D8.2a;C42D8.2b | EAIDALRLLK            | 34 | 3315  | 0.58 | 0.11 | 19 |
| 1 C42D8.2a;C42D8.2b  | YVQMALEK              | 26 | 1473  | 0.59 | 0.09 | 16 |
| 10 C42D8.2a;C42D8.2b | EAIDALRLLK            | 27 | 3647  | 0.59 | 0.19 | 33 |
| 1 C42D8.2a;C42D8.2b  | YVQMALEK              | 38 | 1058  | 0.59 | 0.12 | 20 |
| 22 C42D8.2a;C42D8.2b | TIQETPFPSQSIAEALIK    | 73 | 2790  | 0.59 | 0.12 | 21 |
| 22 C42D8.2a;C42D8.2b | YFAQIGFSQQHMDK        | 48 | 1185  | 0.59 | 0.29 | 49 |
| 22 C42D8.2a;C42D8.2b | RNFEIVYK              | 25 | 2297  | 0.59 | 0.09 | 15 |
| 7 C42D8.2a;C42D8.2b  | RNFEIVYK              | 18 | 2103  | 0.59 | 0.08 | 13 |
| 1 C42D8.2a;C42D8.2b  | YVQMALEK              | 11 | 1735  | 0.59 | 0.18 | 31 |
| 22 C42D8.2a;C42D8.2b | EIHETLYVK             | 11 | 2335  | 0.59 | 0.27 | 46 |
| 7 C42D8.2a;C42D8.2b  | EAIDALRLLK            | 35 | 3759  | 0.59 | 0.29 | 49 |
| 22 C42D8.2a;C42D8.2b | TIQETPFPSQSIAEALIK    | 34 | 2730  | 0.59 | 0.15 | 26 |
| 22 C42D8.2a;C42D8.2b | LVLEENHSIK            | 58 | 27570 | 0.59 | 0.07 | 13 |
| 7 C42D8.2a;C42D8.2b  | TELSQIK               | 22 | 1701  | 0.59 | 0.35 | 59 |
| 10 C42D8.2a;C42D8.2b | EIHETLYVK             | 14 | 2366  | 0.59 | 0.15 | 25 |
| 7 C42D8.2a;C42D8.2b  | TELSQIK               | 26 | 1504  | 0.59 | 0.30 | 51 |
| 1 C42D8.2a;C42D8.2b  | ESRQQPLQLDDYPVSFVESVK | 38 | 1579  | 0.60 | 0.20 | 33 |
| 7 C42D8.2a;C42D8.2b  | YVQMALEK              | 15 | 2204  | 0.60 | 0.13 | 22 |
| 22 C42D8.2a;C42D8.2b | AEFAPFEK              | 17 | 6747  | 0.60 | 0.07 | 12 |
| 1 C42D8.2a;C42D8.2b  | YFAQIGFSQQHMDK        | 16 | 2770  | 0.60 | 0.09 | 14 |
| 7 C42D8.2a;C42D8.2b  | IQAVAGMK              | 30 | 1853  | 0.60 | 0.20 | 34 |
| 22 C42D8.2a;C42D8.2b | TIQETPFPSQSIAEALIK    | 64 | 5577  | 0.60 | 0.14 | 23 |
| 10 C42D8.2a;C42D8.2b | TQLPSYSRK             | 13 | 4041  | 0.60 | 0.11 | 18 |
| 22 C42D8.2a;C42D8.2b | ESRQQPLQLDDYPVSFVESVK | 13 | 2650  | 0.60 | 0.07 | 11 |
| 1 C42D8.2a;C42D8.2b  | YFAQIGFSQQHMDK        | 10 | 1974  | 0.60 | 0.12 | 20 |
| 1 C42D8.2a;C42D8.2b  | EIHETLYVK             | 43 | 2699  | 0.60 | 0.16 | 26 |
| 22 C42D8.2a;C42D8.2b | SVQSVRAYTPIK          | 40 | 3784  | 0.60 | 0.14 | 23 |
| 1 C42D8.2a;C42D8.2b  | YVQMALEK              | 35 | 1359  | 0.61 | 0.18 | 29 |
| 10 C42D8.2a;C42D8.2b | MHLIK                 | 29 | 24621 | 0.61 | 0.06 | 10 |
| 22 C42D8.2a;C42D8.2b | MHLIK                 | 14 | 3359  | 0.61 | 0.16 | 26 |
| 10 C42D8.2a;C42D8.2b | EAIDALRLLK            | 26 | 1846  | 0.61 | 0.09 | 15 |
| 22 C42D8.2a;C42D8.2b | AARLNQJINAVEYK        | 24 | 5406  | 0.61 | 0.22 | 36 |
| 10 C42D8.2a;C42D8.2b | TIQETPFPSQSIAEALIK    | 42 | 2571  | 0.61 | 0.14 | 22 |
| 22 C42D8.2a;C42D8.2b | SVQSVRAYTPIK          | 17 | 1704  | 0.61 | 0.07 | 11 |
| 22 C42D8.2a;C42D8.2b | EAIDALRLLK            | 11 | 3069  | 0.61 | 0.36 | 59 |
| 22 C42D8.2a;C42D8.2b | TIQETPFPSQSIAEALIK    | 74 | 5142  | 0.62 | 0.04 | 7  |
| 10 C42D8.2a;C42D8.2b | TELSQIK               | 11 | 2615  | 0.62 | 0.10 | 16 |
| 1 C42D8.2a;C42D8.2b  | YFAQIGFSQQHMDK        | 36 | 732   | 0.62 | 0.16 | 26 |
| 1 C42D8.2a;C42D8.2b  | EAIDALRLLK            | 26 | 1489  | 0.62 | 0.07 | 11 |
| 10 C42D8.2a;C42D8.2b | SINFDK                | 17 | 2793  | 0.62 | 0.13 | 22 |
| 10 C42D8.2a;C42D8.2b | YFAQIGFSQQHMDK        | 32 | 2071  | 0.62 | 0.19 | 31 |
| 22 C42D8.2a;C42D8.2b | AEFAPFEK              | 25 | 4863  | 0.63 | 0.14 | 23 |
| 1 C42D8.2a;C42D8.2b  | YFAQIGFSQQHMDK        | 40 | 1354  | 0.63 | 0.21 | 34 |
| 22 C42D8.2a;C42D8.2b | EEQSEENTSFFTNEK       | 70 | 1198  | 0.63 | 0.19 | 31 |
| 10 C42D8.2a;C42D8.2b | EIHETLYVK             | 43 | 9854  | 0.63 | 0.17 | 27 |
| 22 C42D8.2a;C42D8.2b | ESEVRSLYTVNVNGQEVMK   | 37 | 2422  | 0.63 | 0.30 | 48 |
| 10 C42D8.2a;C42D8.2b | EIHETLYVK             | 49 | 10457 | 0.63 | 0.13 | 20 |
| 1 C42D8.2a;C42D8.2b  | RNFEIVYK              | 18 | 1198  | 0.63 | 0.25 | 39 |
| 22 C42D8.2a;C42D8.2b | TIQETPFPSQSIAEALIK    | 86 | 3974  | 0.63 | 0.19 | 30 |
| 22 C42D8.2a;C42D8.2b | TQLPSYSRK             | 22 | 5387  | 0.64 | 0.14 | 21 |
| 10 C42D8.2a;C42D8.2b | MHLIK                 | 14 | 10592 | 0.64 | 0.07 | 12 |
| 22 C42D8.2a;C42D8.2b | VLLPIYK               | 22 | 5680  | 0.64 | 0.10 | 16 |
| 22 C42D8.2a;C42D8.2b | TIQETPFPSQSIAEALIK    | 59 | 2191  | 0.64 | 0.13 | 20 |
| 10 C42D8.2a;C42D8.2b | IQSLMEHALAIAGTK       | 55 | 993   | 0.64 | 0.26 | 40 |
| 1 C42D8.2a;C42D8.2b  | FAESRVAK              | 11 | 2573  | 0.64 | 0.07 | 11 |
| 10 C42D8.2a;C42D8.2b | EAIDALRLLK            | 30 | 2834  | 0.64 | 0.09 | 15 |
| 10 C42D8.2a;C42D8.2b | RNFEIVYK              | 11 | 2716  | 0.64 | 0.10 | 15 |
| 10 C42D8.2a;C42D8.2b | IQAVAGMK              | 51 | 1748  | 0.64 | 0.16 | 24 |
| 22 C42D8.2a;C42D8.2b | EAIDALRLLK            | 41 | 1466  | 0.64 | 0.22 | 34 |
| 10 C42D8.2a;C42D8.2b | FLRVFMQQYK            | 31 | 1152  | 0.64 | 0.24 | 37 |
| 22 C42D8.2a;C42D8.2b | SINFDK                | 42 | 7555  | 0.65 | 0.25 | 38 |
| 1 C42D8.2a;C42D8.2b  | YVQMALEK              | 18 | 927   | 0.65 | 0.24 | 38 |
| 22 C42D8.2a;C42D8.2b | TIQETPFPSQSIAEALIK    | 46 | 2230  | 0.65 | 0.16 | 24 |
| 1 C42D8.2a;C42D8.2b  | ESEVRSLYTVNVNGQEVMK   | 25 | 2474  | 0.65 | 0.17 | 27 |
| 1 C42D8.2a;C42D8.2b  | RNFEIVYK              | 19 | 4071  | 0.65 | 0.33 | 51 |
| 22 C42D8.2a;C42D8.2b | EAIDALRLLK            | 27 | 3723  | 0.65 | 0.13 | 21 |
| 22 C42D8.2a;C42D8.2b | FLRVFMQQYK            | 27 | 1287  | 0.65 | 0.11 | 17 |
| 10 C42D8.2a;C42D8.2b | TIQETPFPSQSIAEALIK    | 38 | 1956  | 0.65 | 0.21 | 32 |
| 10 C42D8.2a;C42D8.2b | RNFEIVYK              | 24 | 8013  | 0.65 | 0.06 | 9  |
| 22 C42D8.2a;C42D8.2b | TIQETPFPSQSIAEALIK    | 29 | 1624  | 0.65 | 0.23 | 35 |
| 22 C42D8.2a;C42D8.2b | TIQETPFPSQSIAEALIK    | 58 | 2379  | 0.65 | 0.22 | 34 |
| 10 C42D8.2a;C42D8.2b | TIQETPFPSQSIAEALIK    | 52 | 2481  | 0.65 | 0.17 | 25 |
| 10 C42D8.2a;C42D8.2b | FPTTLGLPLTISGK        | 22 | 1207  | 0.65 | 0.16 | 24 |
| 22 C42D8.2a;C42D8.2b | EIHETLYVK             | 11 | 2810  | 0.66 | 0.14 | 22 |
| 22 C42D8.2a;C42D8.2b | YFAQIGFSQQHMDK        | 52 | 3007  | 0.66 | 0.16 | 24 |
| 22 C42D8.2a;C42D8.2b | RNFEIVYK              | 31 | 6026  | 0.66 | 0.07 | 10 |
| 10 C42D8.2a;C42D8.2b | TELSQIK               | 11 | 1683  | 0.66 | 0.10 | 15 |
| 10 C42D8.2a;C42D8.2b | YVQMALEK              | 42 | 1629  | 0.66 | 0.24 | 36 |
| 22 C42D8.2a;C42D8.2b | IQAVAGMK              | 57 | 2269  | 0.66 | 0.23 | 34 |
| 10 C42D8.2a;C42D8.2b | ESRQQPLQLDDYPVSFVESVK | 53 | 4088  | 0.66 | 0.13 | 19 |

|                      |                       |    |       |      |      |    |
|----------------------|-----------------------|----|-------|------|------|----|
| 22 C42D8.2a;C42D8.2b | VLLPIYK               | 10 | 5166  | 0.66 | 0.11 | 16 |
| 7 C42D8.2a;C42D8.2b  | YVQMALEK              | 17 | 2041  | 0.66 | 0.15 | 23 |
| 1 C42D8.2a;C42D8.2b  | EAIDALRLLK            | 25 | 2735  | 0.66 | 0.10 | 14 |
| 1 C42D8.2a;C42D8.2b  | EAIDALRLLK            | 18 | 1788  | 0.66 | 0.14 | 21 |
| 10 C42D8.2a;C42D8.2b | FPTTLGLPLTISGK        | 32 | 1343  | 0.66 | 0.14 | 21 |
| 22 C42D8.2a;C42D8.2b | TIQETPFPSQSIAEALIK    | 10 | 1076  | 0.67 | 0.23 | 35 |
| 1 C42D8.2a;C42D8.2b  | SVQSVRAYTPIK          | 13 | 1772  | 0.67 | 0.16 | 25 |
| 10 C42D8.2a;C42D8.2b | IQSLMEHALAIAGTK       | 31 | 693   | 0.67 | 0.10 | 15 |
| 10 C42D8.2a;C42D8.2b | RNFEIVYK              | 17 | 2744  | 0.67 | 0.11 | 17 |
| 10 C42D8.2a;C42D8.2b | MHLIK                 | 31 | 10279 | 0.67 | 0.08 | 12 |
| 7 C42D8.2a;C42D8.2b  | EAIDALRLLK            | 33 | 3977  | 0.67 | 0.18 | 26 |
| 22 C42D8.2a;C42D8.2b | EAIDALRLLK            | 20 | 2011  | 0.67 | 0.13 | 20 |
| 10 C42D8.2a;C42D8.2b | SVQSVRAYTPIK          | 10 | 1923  | 0.67 | 0.20 | 29 |
| 22 C42D8.2a;C42D8.2b | TQLPSYSRK             | 19 | 6551  | 0.67 | 0.20 | 30 |
| 10 C42D8.2a;C42D8.2b | VLLPIYK               | 18 | 1773  | 0.67 | 0.11 | 17 |
| 1 C42D8.2a;C42D8.2b  | LVLEENHSIK            | 31 | 4277  | 0.67 | 0.13 | 19 |
| 7 C42D8.2a;C42D8.2b  | TELSQIK               | 37 | 2279  | 0.67 | 0.12 | 17 |
| 10 C42D8.2a;C42D8.2b | EAIDALRLLK            | 21 | 2514  | 0.68 | 0.12 | 18 |
| 22 C42D8.2a;C42D8.2b | AARLNQINAVAEYK        | 58 | 2860  | 0.68 | 0.14 | 21 |
| 10 C42D8.2a;C42D8.2b | AARLNQINAVAEYK        | 41 | 1941  | 0.68 | 0.12 | 18 |
| 10 C42D8.2a;C42D8.2b | YFAQIGFSQQHMDK        | 44 | 2617  | 0.68 | 0.18 | 27 |
| 22 C42D8.2a;C42D8.2b | AARLNQINAVAEYK        | 21 | 2116  | 0.68 | 0.07 | 11 |
| 10 C42D8.2a;C42D8.2b | YFAQIGFSQQHMDK        | 41 | 1192  | 0.68 | 0.11 | 16 |
| 22 C42D8.2a;C42D8.2b | AARLNQINAVAEYK        | 46 | 3970  | 0.68 | 0.11 | 16 |
| 22 C42D8.2a;C42D8.2b | TIQETPFPSQSIAEALIK    | 36 | 1626  | 0.68 | 0.21 | 31 |
| 22 C42D8.2a;C42D8.2b | YFAQIGFSQQHMDK        | 13 | 4815  | 0.68 | 0.16 | 23 |
| 1 C42D8.2a;C42D8.2b  | EIHETLYVK             | 17 | 1572  | 0.68 | 0.25 | 37 |
| 22 C42D8.2a;C42D8.2b | TIQETPFPSQSIAEALIK    | 37 | 2534  | 0.68 | 0.11 | 16 |
| 22 C42D8.2a;C42D8.2b | YFAQIGFSQQHMDK        | 33 | 1299  | 0.68 | 0.24 | 35 |
| 1 C42D8.2a;C42D8.2b  | RNFEIVYK              | 30 | 4024  | 0.69 | 0.07 | 10 |
| 22 C42D8.2a;C42D8.2b | EIHETLYVK             | 59 | 16337 | 0.69 | 0.11 | 15 |
| 22 C42D8.2a;C42D8.2b | FAESRVAK              | 12 | 2955  | 0.69 | 0.14 | 20 |
| 22 C42D8.2a;C42D8.2b | AARLNQINAVAEYK        | 21 | 3907  | 0.69 | 0.09 | 14 |
| 7 C42D8.2a;C42D8.2b  | EAIDALRLLK            | 22 | 2931  | 0.69 | 0.30 | 43 |
| 1 C42D8.2a;C42D8.2b  | YFAQIGFSQQHMDK        | 53 | 1264  | 0.69 | 0.11 | 16 |
| 1 C42D8.2a;C42D8.2b  | SVQSVRAYTPIK          | 26 | 1530  | 0.69 | 0.15 | 22 |
| 7 C42D8.2a;C42D8.2b  | LVLEENHSIK            | 44 | 14151 | 0.69 | 0.11 | 15 |
| 22 C42D8.2a;C42D8.2b | TIQETPFPSQSIAEALIK    | 73 | 2654  | 0.69 | 0.27 | 39 |
| 1 C42D8.2a;C42D8.2b  | YFAQIGFSQQHMDK        | 30 | 1658  | 0.69 | 0.11 | 16 |
| 22 C42D8.2a;C42D8.2b | RNFEIVYK              | 27 | 1917  | 0.69 | 0.07 | 11 |
| 7 C42D8.2a;C42D8.2b  | EAIDALRLLK            | 30 | 2551  | 0.70 | 0.09 | 13 |
| 22 C42D8.2a;C42D8.2b | EIHETLYVK             | 39 | 11533 | 0.70 | 0.15 | 21 |
| 22 C42D8.2a;C42D8.2b | TIQETPFPSQSIAEALIK    | 62 | 3007  | 0.70 | 0.12 | 17 |
| 1 C42D8.2a;C42D8.2b  | SVQSVRAYTPIK          | 14 | 1105  | 0.70 | 0.27 | 38 |
| 1 C42D8.2a;C42D8.2b  | RNFEIVYK              | 11 | 3779  | 0.70 | 0.15 | 21 |
| 10 C42D8.2a;C42D8.2b | IQSLMEHALAIAGTK       | 74 | 1708  | 0.70 | 0.10 | 14 |
| 10 C42D8.2a;C42D8.2b | IQSLMEHALAIAGTK       | 75 | 1576  | 0.70 | 0.10 | 15 |
| 7 C42D8.2a;C42D8.2b  | LVLEENHSIK            | 27 | 5189  | 0.70 | 0.23 | 33 |
| 22 C42D8.2a;C42D8.2b | SVQSVRAYTPIK          | 22 | 2673  | 0.70 | 0.15 | 22 |
| 1 C42D8.2a;C42D8.2b  | YVQMALEK              | 41 | 1612  | 0.70 | 0.08 | 12 |
| 22 C42D8.2a;C42D8.2b | TIQETPFPSQSIAEALIK    | 36 | 2318  | 0.70 | 0.28 | 40 |
| 10 C42D8.2a;C42D8.2b | ESRQQPLQLDDYPVSFVESVK | 48 | 3360  | 0.70 | 0.21 | 30 |
| 22 C42D8.2a;C42D8.2b | TIQETPFPSQSIAEALIK    | 27 | 3140  | 0.71 | 0.23 | 33 |
| 7 C42D8.2a;C42D8.2b  | YVQMALEK              | 17 | 2155  | 0.71 | 0.09 | 13 |
| 22 C42D8.2a;C42D8.2b | SVQSVRAYTPIK          | 23 | 3818  | 0.71 | 0.10 | 14 |
| 1 C42D8.2a;C42D8.2b  | YVQMALEK              | 12 | 322   | 0.71 | 0.20 | 28 |
| 10 C42D8.2a;C42D8.2b | YVQMALEK              | 39 | 3200  | 0.71 | 0.10 | 14 |
| 22 C42D8.2a;C42D8.2b | EIHETLYVK             | 19 | 3356  | 0.71 | 0.07 | 9  |
| 10 C42D8.2a;C42D8.2b | IQSLMEHALAIAGTK       | 54 | 1048  | 0.71 | 0.21 | 29 |
| 1 C42D8.2a;C42D8.2b  | TIQETPFPSQSIAEALIK    | 41 | 2279  | 0.71 | 0.16 | 22 |
| 10 C42D8.2a;C42D8.2b | YVQMALEK              | 54 | 6806  | 0.71 | 0.08 | 11 |
| 1 C42D8.2a;C42D8.2b  | YVQMALEK              | 20 | 922   | 0.71 | 0.34 | 48 |
| 10 C42D8.2a;C42D8.2b | LVLEENHSIK            | 43 | 1628  | 0.72 | 0.12 | 16 |
| 7 C42D8.2a;C42D8.2b  | YFAQIGFSQQHMDK        | 17 | 591   | 0.72 | 0.14 | 20 |
| 22 C42D8.2a;C42D8.2b | YFAQIGFSQQHMDK        | 65 | 4012  | 0.72 | 0.10 | 14 |
| 22 C42D8.2a;C42D8.2b | YFAQIGFSQQHMDK        | 34 | 1809  | 0.72 | 0.23 | 32 |
| 1 C42D8.2a;C42D8.2b  | YVQMALEK              | 51 | 1671  | 0.72 | 0.09 | 12 |
| 10 C42D8.2a;C42D8.2b | VLLPIYK               | 28 | 21755 | 0.72 | 0.04 | 6  |
| 1 C42D8.2a;C42D8.2b  | YVQMALEK              | 15 | 581   | 0.72 | 0.17 | 24 |
| 7 C42D8.2a;C42D8.2b  | AARLNQINAVAEYK        | 22 | 715   | 0.72 | 0.21 | 28 |
| 22 C42D8.2a;C42D8.2b | AARLNQINAVAEYK        | 24 | 3836  | 0.73 | 0.05 | 7  |
| 22 C42D8.2a;C42D8.2b | TIQETPFPSQSIAEALIK    | 56 | 3946  | 0.73 | 0.15 | 21 |
| 10 C42D8.2a;C42D8.2b | ESEVRSLYTVNVNGQEVMK   | 31 | 3385  | 0.73 | 0.14 | 19 |
| 10 C42D8.2a;C42D8.2b | AEFAPFEK              | 25 | 5003  | 0.73 | 0.16 | 21 |
| 10 C42D8.2a;C42D8.2b | AEFAPFEK              | 15 | 6513  | 0.73 | 0.11 | 16 |
| 10 C42D8.2a;C42D8.2b | ESRQQPLQLDDYPVSFVESVK | 44 | 3406  | 0.73 | 0.13 | 18 |
| 7 C42D8.2a;C42D8.2b  | EAIDALRLLK            | 18 | 1846  | 0.73 | 0.32 | 44 |
| 7 C42D8.2a;C42D8.2b  | LVLEENHSIK            | 32 | 7470  | 0.73 | 0.12 | 16 |
| 7 C42D8.2a;C42D8.2b  | EAIDALRLLK            | 20 | 2611  | 0.73 | 0.33 | 46 |
| 22 C42D8.2a;C42D8.2b | EAIDALRLLK            | 13 | 2597  | 0.73 | 0.12 | 17 |
| 10 C42D8.2a;C42D8.2b | RNFEIVYK              | 18 | 7718  | 0.73 | 0.16 | 22 |
| 1 C42D8.2a;C42D8.2b  | YFAQIGFSQQHMDK        | 46 | 1642  | 0.73 | 0.20 | 27 |
| 22 C42D8.2a;C42D8.2b | EAIDALRLLK            | 20 | 3180  | 0.73 | 0.38 | 53 |
| 1 C42D8.2a;C42D8.2b  | EAIDALRLLK            | 14 | 651   | 0.73 | 0.23 | 32 |
| 10 C42D8.2a;C42D8.2b | IQSLMEHALAIAGTK       | 37 | 653   | 0.73 | 0.22 | 30 |
| 22 C42D8.2a;C42D8.2b | EAIDALRLLK            | 12 | 1768  | 0.73 | 0.30 | 40 |
| 10 C42D8.2a;C42D8.2b | FLRVFMQQYK            | 10 | 2780  | 0.73 | 0.22 | 30 |
| 22 C42D8.2a;C42D8.2b | YFAQIGFSQQHMDK        | 48 | 2705  | 0.73 | 0.18 | 24 |
| 1 C42D8.2a;C42D8.2b  | SVQSVRAYTPIK          | 11 | 1854  | 0.74 | 0.13 | 17 |
| 1 C42D8.2a;C42D8.2b  | AARLNQINAVAEYK        | 23 | 2197  | 0.74 | 0.14 | 20 |
| 10 C42D8.2a;C42D8.2b | AEFAPFEK              | 15 | 5879  | 0.74 | 0.11 | 14 |
| 10 C42D8.2a;C42D8.2b | SVQSVRAYTPIK          | 20 | 2024  | 0.74 | 0.16 | 22 |
| 10 C42D8.2a;C42D8.2b | EAIDALRLLK            | 38 | 1993  | 0.74 | 0.13 | 17 |
| 10 C42D8.2a;C42D8.2b | EAIDALRLLK            | 30 | 2063  | 0.74 | 0.18 | 24 |
| 10 C42D8.2a;C42D8.2b | IQSLMEHALAIAGTK       | 72 | 1480  | 0.74 | 0.12 | 16 |
| 1 C42D8.2a;C42D8.2b  | YVQMALEK              | 14 | 672   | 0.74 | 0.08 | 11 |
| 7 C42D8.2a;C42D8.2b  | EAIDALRLLK            | 18 | 1138  | 0.74 | 0.14 | 19 |
| 7 C42D8.2a;C42D8.2b  | EAIDALRLLK            | 10 | 1589  | 0.74 | 0.35 | 48 |
| 10 C42D8.2a;C42D8.2b | VLLPIYK               | 20 | 27215 | 0.74 | 0.11 | 15 |
| 1 C42D8.2a;C42D8.2b  | SVQSVRAYTPIK          | 17 | 1573  | 0.75 | 0.17 | 23 |
| 10 C42D8.2a;C42D8.2b | AEFAPFEK              | 26 | 6034  | 0.75 | 0.15 | 20 |

|                      |                       |    |       |      |      |    |
|----------------------|-----------------------|----|-------|------|------|----|
| 10 C42D8.2a;C42D8.2b | EAIDALRLLK            | 38 | 2180  | 0.75 | 0.13 | 17 |
| 22 C42D8.2a;C42D8.2b | EIHETLYVK             | 49 | 14352 | 0.75 | 0.08 | 11 |
| 10 C42D8.2a;C42D8.2b | TIQETPFPSQSIAEALIK    | 36 | 2287  | 0.75 | 0.17 | 23 |
| 22 C42D8.2a;C42D8.2b | TIQETPFPSQSIAEALIK    | 75 | 3081  | 0.75 | 0.15 | 20 |
| 10 C42D8.2a;C42D8.2b | LVLEENHSIK            | 28 | 10107 | 0.75 | 0.09 | 12 |
| 10 C42D8.2a;C42D8.2b | EAIDALRLLK            | 13 | 1124  | 0.76 | 0.15 | 19 |
| 22 C42D8.2a;C42D8.2b | TIQETPFPSQSIAEALIK    | 73 | 2683  | 0.76 | 0.19 | 25 |
| 10 C42D8.2a;C42D8.2b | YVQMALEK              | 59 | 7712  | 0.76 | 0.08 | 11 |
| 22 C42D8.2a;C42D8.2b | TELSQIK               | 26 | 2511  | 0.76 | 0.37 | 49 |
| 10 C42D8.2a;C42D8.2b | TELSQIK               | 16 | 4827  | 0.77 | 0.09 | 12 |
| 22 C42D8.2a;C42D8.2b | EIHETLYVK             | 35 | 11242 | 0.77 | 0.12 | 15 |
| 10 C42D8.2a;C42D8.2b | RNFEIVYK              | 57 | 5896  | 0.77 | 0.10 | 14 |
| 22 C42D8.2a;C42D8.2b | YFAQIGFSQQHMDK        | 44 | 2526  | 0.77 | 0.14 | 18 |
| 10 C42D8.2a;C42D8.2b | YVQMALEK              | 16 | 2946  | 0.77 | 0.07 | 9  |
| 10 C42D8.2a;C42D8.2b | EAIDALRLLK            | 40 | 3072  | 0.77 | 0.10 | 13 |
| 22 C42D8.2a;C42D8.2b | TIQETPFPSQSIAEALIK    | 38 | 2034  | 0.77 | 0.21 | 27 |
| 7 C42D8.2a;C42D8.2b  | FAESRVAK              | 15 | 2279  | 0.77 | 0.17 | 22 |
| 10 C42D8.2a;C42D8.2b | YFAQIGFSQQHMDK        | 44 | 3153  | 0.77 | 0.07 | 9  |
| 22 C42D8.2a;C42D8.2b | YFAQIGFSQQHMDK        | 46 | 1845  | 0.77 | 0.10 | 12 |
| 22 C42D8.2a;C42D8.2b | EIHETLYVK             | 14 | 5097  | 0.77 | 0.11 | 14 |
| 1 C42D8.2a;C42D8.2b  | FAESRVAK              | 24 | 2060  | 0.77 | 0.06 | 8  |
| 22 C42D8.2a;C42D8.2b | YVQMALEK              | 35 | 1382  | 0.77 | 0.12 | 16 |
| 22 C42D8.2a;C42D8.2b | SINFDK                | 28 | 5128  | 0.78 | 0.16 | 20 |
| 22 C42D8.2a;C42D8.2b | TIQETPFPSQSIAEALIK    | 83 | 3069  | 0.78 | 0.26 | 33 |
| 10 C42D8.2a;C42D8.2b | FAESRVAK              | 18 | 2867  | 0.78 | 0.17 | 21 |
| 22 C42D8.2a;C42D8.2b | TIQETPFPSQSIAEALIK    | 48 | 2561  | 0.78 | 0.13 | 17 |
| 22 C42D8.2a;C42D8.2b | ESEVRSLYTVNVNGQEVMK   | 48 | 3864  | 0.78 | 0.14 | 19 |
| 10 C42D8.2a;C42D8.2b | YVQMALEK              | 47 | 2916  | 0.78 | 0.12 | 15 |
| 7 C42D8.2a;C42D8.2b  | EAIDALRLLK            | 22 | 1231  | 0.78 | 0.10 | 13 |
| 1 C42D8.2a;C42D8.2b  | TIQETPFPSQSIAEALIK    | 57 | 1986  | 0.78 | 0.06 | 8  |
| 22 C42D8.2a;C42D8.2b | ESRQQPLQLDDYPVSFVESVK | 30 | 3146  | 0.79 | 0.14 | 18 |
| 22 C42D8.2a;C42D8.2b | AARLNQINAVEYK         | 40 | 3930  | 0.79 | 0.10 | 13 |
| 7 C42D8.2a;C42D8.2b  | RNFEIVYK              | 34 | 2390  | 0.79 | 0.11 | 14 |
| 22 C42D8.2a;C42D8.2b | RNFEIVYK              | 28 | 2051  | 0.79 | 0.07 | 8  |
| 10 C42D8.2a;C42D8.2b | RNFEIVYK              | 12 | 1935  | 0.79 | 0.23 | 29 |
| 22 C42D8.2a;C42D8.2b | RNFEIVYK              | 18 | 1818  | 0.79 | 0.09 | 11 |
| 10 C42D8.2a;C42D8.2b | RNFEIVYK              | 16 | 3869  | 0.79 | 0.14 | 18 |
| 7 C42D8.2a;C42D8.2b  | SVQSVRAYTPIK          | 17 | 1750  | 0.79 | 0.14 | 18 |
| 10 C42D8.2a;C42D8.2b | RNFEIVYK              | 20 | 2239  | 0.80 | 0.09 | 11 |
| 10 C42D8.2a;C42D8.2b | EIHETLYVK             | 57 | 43439 | 0.80 | 0.12 | 16 |
| 7 C42D8.2a;C42D8.2b  | YVQMALEK              | 29 | 2131  | 0.80 | 0.15 | 19 |
| 22 C42D8.2a;C42D8.2b | YFAQIGFSQQHMDK        | 41 | 1948  | 0.80 | 0.14 | 18 |
| 22 C42D8.2a;C42D8.2b | EIHETLYVK             | 26 | 1857  | 0.80 | 0.14 | 17 |
| 10 C42D8.2a;C42D8.2b | FLRVFMQQYK            | 15 | 2750  | 0.80 | 0.24 | 30 |
| 22 C42D8.2a;C42D8.2b | EAIDALRLLK            | 27 | 1827  | 0.80 | 0.09 | 11 |
| 22 C42D8.2a;C42D8.2b | NSFLPK                | 42 | 912   | 0.80 | 0.14 | 18 |
| 1 C42D8.2a;C42D8.2b  | SVQSVRAYTPIK          | 21 | 620   | 0.80 | 0.24 | 30 |
| 7 C42D8.2a;C42D8.2b  | YFAQIGFSQQHMDK        | 11 | 1026  | 0.80 | 0.13 | 16 |
| 10 C42D8.2a;C42D8.2b | RNFEIVYK              | 16 | 568   | 0.80 | 0.16 | 19 |
| 22 C42D8.2a;C42D8.2b | EAIDALRLLK            | 19 | 1141  | 0.81 | 0.38 | 47 |
| 22 C42D8.2a;C42D8.2b | SVQSVRAYTPIK          | 23 | 3715  | 0.81 | 0.05 | 6  |
| 22 C42D8.2a;C42D8.2b | YFAQIGFSQQHMDK        | 44 | 2993  | 0.81 | 0.12 | 15 |
| 22 C42D8.2a;C42D8.2b | YFAQIGFSQQHMDK        | 27 | 2251  | 0.81 | 0.12 | 15 |
| 22 C42D8.2a;C42D8.2b | LVLEENHSIK            | 28 | 3690  | 0.81 | 0.10 | 13 |
| 22 C42D8.2a;C42D8.2b | EAIDALRLLK            | 16 | 1311  | 0.81 | 0.11 | 13 |
| 1 C42D8.2a;C42D8.2b  | YFAQIGFSQQHMDK        | 23 | 389   | 0.81 | 0.13 | 16 |
| 22 C42D8.2a;C42D8.2b | EAIDALRLLK            | 28 | 2608  | 0.82 | 0.14 | 17 |
| 1 C42D8.2a;C42D8.2b  | RNFEIVYK              | 12 | 2000  | 0.82 | 0.08 | 9  |
| 22 C42D8.2a;C42D8.2b | YVQMALEK              | 15 | 3910  | 0.82 | 0.08 | 9  |
| 10 C42D8.2a;C42D8.2b | AARLNQINAVEYK         | 33 | 4534  | 0.82 | 0.11 | 14 |
| 22 C42D8.2a;C42D8.2b | YVQMALEK              | 54 | 3521  | 0.82 | 0.13 | 16 |
| 10 C42D8.2a;C42D8.2b | ESEVRSLYTVNVNGQEVMK   | 49 | 4411  | 0.82 | 0.17 | 20 |
| 7 C42D8.2a;C42D8.2b  | YVQMALEK              | 42 | 1769  | 0.82 | 0.10 | 12 |
| 22 C42D8.2a;C42D8.2b | AEFAPFEK              | 35 | 3361  | 0.83 | 0.20 | 24 |
| 1 C42D8.2a;C42D8.2b  | EIHETLYVK             | 17 | 1418  | 0.83 | 0.18 | 22 |
| 22 C42D8.2a;C42D8.2b | SVQSVRAYTPIK          | 25 | 5197  | 0.83 | 0.18 | 22 |
| 22 C42D8.2a;C42D8.2b | TQLPSYSRK             | 22 | 2530  | 0.83 | 0.12 | 15 |
| 22 C42D8.2a;C42D8.2b | IQAVAGMK              | 57 | 1641  | 0.83 | 0.16 | 20 |
| 22 C42D8.2a;C42D8.2b | YVQMALEK              | 51 | 4244  | 0.83 | 0.11 | 13 |
| 10 C42D8.2a;C42D8.2b | NSFLPK                | 31 | 646   | 0.83 | 0.12 | 14 |
| 7 C42D8.2a;C42D8.2b  | LVLEENHSIK            | 23 | 8422  | 0.83 | 0.13 | 15 |
| 22 C42D8.2a;C42D8.2b | MHLIK                 | 15 | 2270  | 0.83 | 0.18 | 22 |
| 22 C42D8.2a;C42D8.2b | EIHETLYVK             | 14 | 944   | 0.83 | 0.18 | 22 |
| 10 C42D8.2a;C42D8.2b | SVQSVRAYTPIK          | 27 | 10684 | 0.84 | 0.09 | 11 |
| 22 C42D8.2a;C42D8.2b | YFAQIGFSQQHMDK        | 46 | 982   | 0.84 | 0.22 | 26 |
| 10 C42D8.2a;C42D8.2b | FAESRVAK              | 22 | 8502  | 0.84 | 0.13 | 15 |
| 22 C42D8.2a;C42D8.2b | TIQETPFPSQSIAEALIK    | 54 | 2637  | 0.84 | 0.25 | 30 |
| 22 C42D8.2a;C42D8.2b | SINFDK                | 18 | 2062  | 0.84 | 0.48 | 57 |
| 10 C42D8.2a;C42D8.2b | EIHETLYVK             | 35 | 10156 | 0.84 | 0.06 | 7  |
| 1 C42D8.2a;C42D8.2b  | RNFEIVYK              | 19 | 2814  | 0.84 | 0.25 | 29 |
| 10 C42D8.2a;C42D8.2b | AARLNQINAVEYK         | 16 | 5602  | 0.84 | 0.12 | 15 |
| 1 C42D8.2a;C42D8.2b  | EIHETLYVK             | 16 | 5043  | 0.84 | 0.14 | 16 |
| 22 C42D8.2a;C42D8.2b | RNFEIVYK              | 50 | 1871  | 0.84 | 0.09 | 10 |
| 10 C42D8.2a;C42D8.2b | YVQMALEK              | 42 | 2027  | 0.84 | 0.12 | 15 |
| 22 C42D8.2a;C42D8.2b | YVQMALEK              | 38 | 3465  | 0.84 | 0.04 | 5  |
| 22 C42D8.2a;C42D8.2b | NSEEMIIK              | 21 | 523   | 0.84 | 0.17 | 20 |
| 10 C42D8.2a;C42D8.2b | YFAQIGFSQQHMDK        | 68 | 6880  | 0.85 | 0.09 | 11 |
| 10 C42D8.2a;C42D8.2b | RNFEIVYK              | 41 | 4228  | 0.85 | 0.17 | 20 |
| 10 C42D8.2a;C42D8.2b | LVLEENHSIK            | 37 | 10723 | 0.85 | 0.13 | 16 |
| 1 C42D8.2a;C42D8.2b  | SVQSVRAYTPIK          | 12 | 1581  | 0.85 | 0.22 | 26 |
| 7 C42D8.2a;C42D8.2b  | TQLPSYSRK             | 14 | 1950  | 0.85 | 0.32 | 38 |
| 22 C42D8.2a;C42D8.2b | EAIDALRLLK            | 34 | 3015  | 0.85 | 0.08 | 9  |
| 22 C42D8.2a;C42D8.2b | TIQETPFPSQSIAEALIK    | 15 | 548   | 0.85 | 0.19 | 23 |
| 10 C42D8.2a;C42D8.2b | YFAQIGFSQQHMDK        | 49 | 3644  | 0.85 | 0.12 | 14 |
| 10 C42D8.2a;C42D8.2b | SVQSVRAYTPIK          | 21 | 2825  | 0.85 | 0.16 | 19 |
| 22 C42D8.2a;C42D8.2b | EIHETLYVK             | 19 | 6462  | 0.86 | 0.18 | 21 |
| 22 C42D8.2a;C42D8.2b | EEQSEENTSFFTNEK       | 40 | 955   | 0.86 | 0.12 | 14 |
| 7 C42D8.2a;C42D8.2b  | EIHETLYVK             | 28 | 3406  | 0.86 | 0.20 | 23 |
| 1 C42D8.2a;C42D8.2b  | SVQSVRAYTPIK          | 10 | 1558  | 0.86 | 0.17 | 20 |
| 22 C42D8.2a;C42D8.2b | FAESRVAK              | 24 | 4935  | 0.86 | 0.08 | 9  |
| 22 C42D8.2a;C42D8.2b | YVQMALEK              | 32 | 3914  | 0.87 | 0.10 | 12 |

|                      |                       |    |       |      |      |    |
|----------------------|-----------------------|----|-------|------|------|----|
| 22 C42D8.2a;C42D8.2b | NVQVPRVYLPSIAQRSVK    | 13 | 1248  | 0.87 | 0.16 | 18 |
| 10 C42D8.2a;C42D8.2b | EIHETLYVK             | 50 | 36435 | 0.87 | 0.10 | 12 |
| 7 C42D8.2a;C42D8.2b  | RNFEIVYK              | 12 | 3031  | 0.87 | 0.13 | 15 |
| 1 C42D8.2a;C42D8.2b  | EIHETLYVK             | 25 | 4742  | 0.87 | 0.13 | 15 |
| 22 C42D8.2a;C42D8.2b | RNFEIVYK              | 24 | 4290  | 0.87 | 0.11 | 12 |
| 10 C42D8.2a;C42D8.2b | IQAVAGMK              | 18 | 1539  | 0.88 | 0.21 | 24 |
| 7 C42D8.2a;C42D8.2b  | YVQMALEK              | 29 | 1486  | 0.88 | 0.12 | 13 |
| 10 C42D8.2a;C42D8.2b | EAIDALRLLK            | 35 | 2903  | 0.88 | 0.14 | 15 |
| 10 C42D8.2a;C42D8.2b | TQLPSYSRK             | 10 | 10507 | 0.88 | 0.05 | 6  |
| 10 C42D8.2a;C42D8.2b | YFAQIGFSQQHMDK        | 59 | 2949  | 0.89 | 0.08 | 9  |
| 10 C42D8.2a;C42D8.2b | IQAVAGMK              | 15 | 822   | 0.89 | 0.12 | 13 |
| 22 C42D8.2a;C42D8.2b | ESRQQPLQLDDYPVSFVESVK | 31 | 2825  | 0.89 | 0.17 | 19 |
| 22 C42D8.2a;C42D8.2b | EIHETLYVK             | 21 | 5851  | 0.89 | 0.11 | 12 |
| 22 C42D8.2a;C42D8.2b | FAESRVAK              | 17 | 10223 | 0.89 | 0.05 | 6  |
| 7 C42D8.2a;C42D8.2b  | EIHETLYVK             | 19 | 2596  | 0.89 | 0.11 | 12 |
| 1 C42D8.2a;C42D8.2b  | TIQETPFPSQSIAEALIK    | 45 | 1972  | 0.89 | 0.20 | 22 |
| 22 C42D8.2a;C42D8.2b | RNFEIVYK              | 24 | 1478  | 0.89 | 0.12 | 14 |
| 10 C42D8.2a;C42D8.2b | YFAQIGFSQQHMDK        | 59 | 3229  | 0.89 | 0.14 | 16 |
| 10 C42D8.2a;C42D8.2b | IQSLMEHALAIAGTK       | 66 | 1110  | 0.89 | 0.18 | 20 |
| 7 C42D8.2a;C42D8.2b  | RNFEIVYK              | 18 | 2015  | 0.90 | 0.04 | 5  |
| 22 C42D8.2a;C42D8.2b | SVQSVRAYTPIK          | 22 | 1458  | 0.90 | 0.17 | 19 |
| 22 C42D8.2a;C42D8.2b | RNFEIVYK              | 28 | 2281  | 0.90 | 0.16 | 18 |
| 22 C42D8.2a;C42D8.2b | SINFDK                | 35 | 3618  | 0.90 | 0.16 | 18 |
| 10 C42D8.2a;C42D8.2b | IQSLMEHALAIAGTK       | 44 | 645   | 0.90 | 0.19 | 21 |
| 10 C42D8.2a;C42D8.2b | FAESRVAK              | 41 | 4071  | 0.90 | 0.08 | 9  |
| 22 C42D8.2a;C42D8.2b | AARLNQINAVAHEYK       | 30 | 1213  | 0.90 | 0.17 | 19 |
| 1 C42D8.2a;C42D8.2b  | TQLPSYSRK             | 11 | 3318  | 0.90 | 0.13 | 15 |
| 10 C42D8.2a;C42D8.2b | TQLPSYSRK             | 16 | 5093  | 0.90 | 0.08 | 9  |
| 22 C42D8.2a;C42D8.2b | TQLPSYSRK             | 16 | 4100  | 0.90 | 0.10 | 11 |
| 7 C42D8.2a;C42D8.2b  | EIHETLYVK             | 44 | 7598  | 0.90 | 0.12 | 13 |
| 10 C42D8.2a;C42D8.2b | YVQMALEK              | 29 | 1641  | 0.91 | 0.07 | 8  |
| 22 C42D8.2a;C42D8.2b | YFAQIGFSQQHMDK        | 47 | 3507  | 0.91 | 0.15 | 17 |
| 10 C42D8.2a;C42D8.2b | IQSLMEHALAIAGTK       | 69 | 1044  | 0.92 | 0.15 | 17 |
| 10 C42D8.2a;C42D8.2b | YFAQIGFSQQHMDK        | 31 | 978   | 0.92 | 0.12 | 13 |
| 7 C42D8.2a;C42D8.2b  | AARLNQINAVAHEYK       | 15 | 1311  | 0.92 | 0.14 | 15 |
| 10 C42D8.2a;C42D8.2b | EIHETLYVK             | 53 | 12398 | 0.92 | 0.10 | 11 |
| 10 C42D8.2a;C42D8.2b | YVQMALEK              | 46 | 3358  | 0.92 | 0.14 | 15 |
| 7 C42D8.2a;C42D8.2b  | AARLNQINAVAHEYK       | 33 | 2213  | 0.93 | 0.15 | 16 |
| 22 C42D8.2a;C42D8.2b | AARLNQINAVAHEYK       | 33 | 3506  | 0.93 | 0.12 | 13 |
| 10 C42D8.2a;C42D8.2b | SVQSVRAYTPIK          | 28 | 3629  | 0.93 | 0.09 | 10 |
| 1 C42D8.2a;C42D8.2b  | ESEVRSLYTVNVNGQEVMK   | 10 | 1216  | 0.93 | 0.19 | 21 |
| 22 C42D8.2a;C42D8.2b | SINFDK                | 24 | 1936  | 0.93 | 0.33 | 35 |
| 1 C42D8.2a;C42D8.2b  | YFAQIGFSQQHMDK        | 31 | 1152  | 0.93 | 0.22 | 24 |
| 22 C42D8.2a;C42D8.2b | FAESRVAK              | 28 | 12219 | 0.94 | 0.07 | 8  |
| 10 C42D8.2a;C42D8.2b | SVISLK                | 17 | 1080  | 0.94 | 0.05 | 6  |
| 1 C42D8.2a;C42D8.2b  | RNFEIVYK              | 11 | 1579  | 0.95 | 0.08 | 8  |
| 22 C42D8.2a;C42D8.2b | LVLEENHSIK            | 20 | 2709  | 0.95 | 0.12 | 13 |
| 22 C42D8.2a;C42D8.2b | NSFLPK                | 12 | 361   | 0.95 | 0.31 | 32 |
| 7 C42D8.2a;C42D8.2b  | EAIDALRLLK            | 12 | 2675  | 0.95 | 0.10 | 10 |
| 7 C42D8.2a;C42D8.2b  | AARLNQINAVAHEYK       | 34 | 3411  | 0.95 | 0.14 | 15 |
| 7 C42D8.2a;C42D8.2b  | YVQMALEK              | 40 | 1120  | 0.95 | 0.17 | 18 |
| 10 C42D8.2a;C42D8.2b | AARLNQINAVAHEYK       | 45 | 4159  | 0.95 | 0.10 | 10 |
| 10 C42D8.2a;C42D8.2b | SVQSVRAYTPIK          | 19 | 1950  | 0.95 | 0.14 | 14 |
| 10 C42D8.2a;C42D8.2b | RNFEIVYK              | 12 | 845   | 0.96 | 0.02 | 2  |
| 22 C42D8.2a;C42D8.2b | EIHETLYVK             | 13 | 2570  | 0.96 | 0.19 | 20 |
| 7 C42D8.2a;C42D8.2b  | YVQMALEK              | 12 | 865   | 0.96 | 0.11 | 11 |
| 10 C42D8.2a;C42D8.2b | EAIDALRLLK            | 23 | 2298  | 0.96 | 0.19 | 20 |
| 10 C42D8.2a;C42D8.2b | YFAQIGFSQQHMDK        | 17 | 1579  | 0.97 | 0.23 | 23 |
| 22 C42D8.2a;C42D8.2b | IQSLMEHALAIAGTK       | 71 | 1145  | 0.97 | 0.15 | 16 |
| 1 C42D8.2a;C42D8.2b  | EIHETLYVK             | 30 | 2098  | 0.97 | 0.11 | 11 |
| 7 C42D8.2a;C42D8.2b  | VLLPIYK               | 11 | 1455  | 0.97 | 0.14 | 14 |
| 22 C42D8.2a;C42D8.2b | YFAQIGFSQQHMDK        | 66 | 2888  | 0.97 | 0.19 | 19 |
| 22 C42D8.2a;C42D8.2b | EAIDALRLLK            | 12 | 1227  | 0.97 | 0.10 | 10 |
| 7 C42D8.2a;C42D8.2b  | NVQVPRVYLPSIAQRSVK    | 13 | 2085  | 0.98 | 0.27 | 27 |
| 10 C42D8.2a;C42D8.2b | YFAQIGFSQQHMDK        | 62 | 7242  | 0.98 | 0.10 | 10 |
| 10 C42D8.2a;C42D8.2b | YFAQIGFSQQHMDK        | 31 | 848   | 0.98 | 0.13 | 13 |
| 10 C42D8.2a;C42D8.2b | DTELIRPQTVYTYVLENEELK | 24 | 992   | 0.98 | 0.30 | 30 |
| 22 C42D8.2a;C42D8.2b | EAIDALRLLK            | 13 | 2274  | 0.98 | 0.08 | 9  |
| 7 C42D8.2a;C42D8.2b  | YVQMALEK              | 39 | 1888  | 0.98 | 0.08 | 9  |
| 10 C42D8.2a;C42D8.2b | DCSEPTFAVLSK          | 51 | 1515  | 0.99 | 0.07 | 7  |
| 10 C42D8.2a;C42D8.2b | EIHETLYVK             | 30 | 7891  | 0.99 | 0.12 | 12 |
| 10 C42D8.2a;C42D8.2b | TIQETPFPSQSIAEALIK    | 50 | 4857  | 0.99 | 0.23 | 23 |
| 10 C42D8.2a;C42D8.2b | SVQSVRAYTPIK          | 20 | 1630  | 0.99 | 0.14 | 14 |
| 22 C42D8.2a;C42D8.2b | SVQSVRAYTPIK          | 16 | 1323  | 0.99 | 0.23 | 23 |
| 10 C42D8.2a;C42D8.2b | SVISLK                | 14 | 682   | 1.00 | 0.19 | 19 |
| 1 C42D8.2a;C42D8.2b  | TIQETPFPSQSIAEALIK    | 28 | 1274  | 1.00 | 0.16 | 16 |
| 22 C42D8.2a;C42D8.2b | YVQMALEK              | 45 | 4056  | 1.00 | 0.06 | 6  |
| 10 C42D8.2a;C42D8.2b | YVQMALEK              | 59 | 2929  | 1.00 | 0.08 | 8  |
| 7 C42D8.2a;C42D8.2b  | EIHETLYVK             | 22 | 4533  | 1.00 | 0.15 | 15 |
| 22 C42D8.2a;C42D8.2b | TQLPSYSRK             | 14 | 3692  | 1.00 | 0.10 | 10 |
| 10 C42D8.2a;C42D8.2b | YVQMALEK              | 16 | 3432  | 1.00 | 0.10 | 10 |
| 7 C42D8.2a;C42D8.2b  | EAIDALRLLK            | 11 | 950   | 1.00 | 0.22 | 22 |
| 22 C42D8.2a;C42D8.2b | EIHETLYVK             | 24 | 2922  | 1.00 | 0.12 | 12 |
| 22 C42D8.2a;C42D8.2b | AARLNQINAVAHEYK       | 38 | 4536  | 1.00 | 0.12 | 12 |
| 1 C42D8.2a;C42D8.2b  | YVQMALEK              | 34 | 653   | 1.00 | 0.15 | 15 |
| 22 C42D8.2a;C42D8.2b | SINFDK                | 14 | 3733  | 1.01 | 0.15 | 15 |
| 10 C42D8.2a;C42D8.2b | AARLNQINAVAHEYK       | 49 | 3683  | 1.01 | 0.09 | 9  |
| 1 C42D8.2a;C42D8.2b  | LVLEENHSIK            | 47 | 3827  | 1.01 | 0.13 | 13 |
| 10 C42D8.2a;C42D8.2b | TLEGDCQVAYTVIREQK     | 12 | 4524  | 1.01 | 0.15 | 15 |
| 1 C42D8.2a;C42D8.2b  | EIHETLYVK             | 23 | 2903  | 1.01 | 0.13 | 13 |
| 10 C42D8.2a;C42D8.2b | SVQSVRAYTPIK          | 15 | 1017  | 1.01 | 0.16 | 16 |
| 10 C42D8.2a;C42D8.2b | YVQMALEK              | 18 | 2966  | 1.02 | 0.10 | 10 |
| 10 C42D8.2a;C42D8.2b | SVQSVRAYTPIK          | 16 | 3338  | 1.02 | 0.11 | 11 |
| 10 C42D8.2a;C42D8.2b | YVQMALEK              | 48 | 3860  | 1.02 | 0.10 | 9  |
| 10 C42D8.2a;C42D8.2b | RNFEIVYK              | 39 | 1239  | 1.03 | 0.08 | 8  |
| 10 C42D8.2a;C42D8.2b | YFAQIGFSQQHMDK        | 55 | 1395  | 1.03 | 0.17 | 16 |
| 1 C42D8.2a;C42D8.2b  | EIHETLYVK             | 11 | 2453  | 1.03 | 0.08 | 7  |
| 22 C42D8.2a;C42D8.2b | EIHETLYVK             | 30 | 17109 | 1.03 | 0.11 | 11 |
| 7 C42D8.2a;C42D8.2b  | SVQSVRAYTPIK          | 26 | 1647  | 1.04 | 0.15 | 14 |
| 22 C42D8.2a;C42D8.2b | TQLPSYSRK             | 20 | 3878  | 1.04 | 0.10 | 10 |
| 10 C42D8.2a;C42D8.2b | FAESRVAK              | 32 | 5880  | 1.04 | 0.03 | 3  |

|                      |                      |    |       |      |      |    |
|----------------------|----------------------|----|-------|------|------|----|
| 7 C42D8.2a;C42D8.2b  | TELSQIK              | 15 | 1368  | 1.04 | 0.46 | 44 |
| 22 C42D8.2a;C42D8.2b | RNFEIVYK             | 16 | 5292  | 1.04 | 0.12 | 12 |
| 1 C42D8.2a;C42D8.2b  | YFAQIGFSQQHMDK       | 23 | 865   | 1.04 | 0.16 | 15 |
| 22 C42D8.2a;C42D8.2b | IQSLMEHALAIAGTK      | 58 | 806   | 1.04 | 0.12 | 11 |
| 10 C42D8.2a;C42D8.2b | AARLNQINAVAEYK       | 17 | 3638  | 1.04 | 0.11 | 11 |
| 10 C42D8.2a;C42D8.2b | EIHETLYVK            | 23 | 2616  | 1.04 | 0.10 | 10 |
| 10 C42D8.2a;C42D8.2b | RNFEIVYK             | 36 | 7160  | 1.04 | 0.15 | 14 |
| 22 C42D8.2a;C42D8.2b | NVQVPRVYLPSIAQRSVK   | 14 | 2751  | 1.05 | 0.43 | 41 |
| 10 C42D8.2a;C42D8.2b | YFAQIGFSQQHMDK       | 45 | 1512  | 1.05 | 0.13 | 13 |
| 10 C42D8.2a;C42D8.2b | YFAQIGFSQQHMDK       | 16 | 2872  | 1.05 | 0.16 | 15 |
| 22 C42D8.2a;C42D8.2b | YFAQIGFSQQHMDK       | 11 | 3473  | 1.06 | 0.08 | 8  |
| 7 C42D8.2a;C42D8.2b  | EIHETLYVK            | 43 | 10062 | 1.06 | 0.07 | 7  |
| 10 C42D8.2a;C42D8.2b | SVQSVRAYTPIK         | 33 | 15179 | 1.06 | 0.11 | 10 |
| 22 C42D8.2a;C42D8.2b | IQSLMEHALAIAGTK      | 29 | 526   | 1.07 | 0.19 | 18 |
| 22 C42D8.2a;C42D8.2b | FAESRVAK             | 25 | 6482  | 1.07 | 0.11 | 10 |
| 10 C42D8.2a;C42D8.2b | SVQSVRAYTPIK         | 16 | 2346  | 1.07 | 0.15 | 14 |
| 10 C42D8.2a;C42D8.2b | NVQVPRVYLPSIAQRSVK   | 17 | 2995  | 1.08 | 0.09 | 8  |
| 10 C42D8.2a;C42D8.2b | EIHETLYVK            | 47 | 8805  | 1.08 | 0.08 | 7  |
| 22 C42D8.2a;C42D8.2b | EAIDALRLLK           | 12 | 1077  | 1.08 | 0.27 | 25 |
| 10 C42D8.2a;C42D8.2b | LVLEENHSIK           | 48 | 13597 | 1.08 | 0.10 | 10 |
| 22 C42D8.2a;C42D8.2b | EIHETLYVK            | 36 | 8376  | 1.09 | 0.09 | 8  |
| 1 C42D8.2a;C42D8.2b  | EIHETLYVK            | 17 | 3113  | 1.09 | 0.06 | 6  |
| 7 C42D8.2a;C42D8.2b  | EAIDALRLLK           | 15 | 1372  | 1.09 | 0.09 | 8  |
| 10 C42D8.2a;C42D8.2b | RNFEIVYK             | 37 | 6439  | 1.09 | 0.07 | 6  |
| 10 C42D8.2a;C42D8.2b | TIQETPFPSQSIAEALIK   | 42 | 1934  | 1.10 | 0.11 | 10 |
| 10 C42D8.2a;C42D8.2b | SVQSVRAYTPIK         | 21 | 3066  | 1.10 | 0.17 | 16 |
| 1 C42D8.2a;C42D8.2b  | LVLEENHSIK           | 24 | 3491  | 1.10 | 0.25 | 22 |
| 10 C42D8.2a;C42D8.2b | AARLNQINAVAEYK       | 12 | 1972  | 1.10 | 0.17 | 15 |
| 1 C42D8.2a;C42D8.2b  | LVLEENHSIK           | 49 | 1823  | 1.10 | 0.20 | 18 |
| 7 C42D8.2a;C42D8.2b  | SVQSVRAYTPIK         | 13 | 1407  | 1.10 | 0.19 | 17 |
| 10 C42D8.2a;C42D8.2b | TIQETPFPSQSIAEALIK   | 30 | 2100  | 1.11 | 0.10 | 9  |
| 7 C42D8.2a;C42D8.2b  | EIHETLYVK            | 31 | 4511  | 1.11 | 0.09 | 9  |
| 10 C42D8.2a;C42D8.2b | AARLNQINAVAEYK       | 70 | 4257  | 1.11 | 0.11 | 10 |
| 22 C42D8.2a;C42D8.2b | IQSLMEHALAIAGTK      | 11 | 817   | 1.12 | 0.08 | 8  |
| 22 C42D8.2a;C42D8.2b | YVQMALEK             | 13 | 661   | 1.12 | 0.09 | 8  |
| 22 C42D8.2a;C42D8.2b | AEFAPFEK             | 13 | 4449  | 1.12 | 0.17 | 15 |
| 7 C42D8.2a;C42D8.2b  | EAIDALRLLK           | 15 | 1031  | 1.12 | 0.11 | 9  |
| 1 C42D8.2a;C42D8.2b  | TQLPSYSRK            | 14 | 5249  | 1.12 | 0.18 | 16 |
| 1 C42D8.2a;C42D8.2b  | TIQETPFPSQSIAEALIK   | 49 | 1279  | 1.13 | 0.14 | 12 |
| 1 C42D8.2a;C42D8.2b  | LVLEENHSIK           | 41 | 2839  | 1.13 | 0.10 | 9  |
| 10 C42D8.2a;C42D8.2b | YVQMALEK             | 33 | 1388  | 1.13 | 0.16 | 14 |
| 22 C42D8.2a;C42D8.2b | RNFEIVYK             | 28 | 4932  | 1.13 | 0.11 | 10 |
| 22 C42D8.2a;C42D8.2b | RNFEIVYK             | 26 | 1905  | 1.14 | 0.06 | 5  |
| 10 C42D8.2a;C42D8.2b | YFAQIGFSQQHMDK       | 71 | 2815  | 1.14 | 0.21 | 19 |
| 10 C42D8.2a;C42D8.2b | RNFEIVYK             | 36 | 1301  | 1.14 | 0.12 | 10 |
| 10 C42D8.2a;C42D8.2b | RNFEIVYK             | 28 | 6903  | 1.14 | 0.10 | 9  |
| 1 C42D8.2a;C42D8.2b  | TQLPSYSRK            | 11 | 4554  | 1.14 | 0.12 | 10 |
| 10 C42D8.2a;C42D8.2b | TQLPSYSRK            | 11 | 8829  | 1.14 | 0.11 | 9  |
| 1 C42D8.2a;C42D8.2b  | TQLPSYSRK            | 14 | 4513  | 1.14 | 0.14 | 12 |
| 22 C42D8.2a;C42D8.2b | RNFEIVYK             | 25 | 1042  | 1.14 | 0.14 | 13 |
| 22 C42D8.2a;C42D8.2b | RAVVNMISFNPIAPRNEIEK | 21 | 1825  | 1.14 | 0.16 | 14 |
| 22 C42D8.2a;C42D8.2b | TQLPSYSRK            | 23 | 4246  | 1.14 | 0.15 | 13 |
| 22 C42D8.2a;C42D8.2b | RNFEIVYK             | 10 | 2671  | 1.15 | 0.08 | 7  |
| 22 C42D8.2a;C42D8.2b | TQLPSYSRK            | 10 | 5236  | 1.15 | 0.07 | 6  |
| 7 C42D8.2a;C42D8.2b  | MHLIK                | 16 | 2026  | 1.15 | 0.20 | 18 |
| 22 C42D8.2a;C42D8.2b | YFAQIGFSQQHMDK       | 12 | 1599  | 1.15 | 0.16 | 14 |
| 22 C42D8.2a;C42D8.2b | IQSLMEHALAIAGTK      | 48 | 892   | 1.16 | 0.13 | 11 |
| 22 C42D8.2a;C42D8.2b | TQLPSYSRK            | 28 | 6173  | 1.16 | 0.13 | 12 |
| 1 C42D8.2a;C42D8.2b  | RNFEIVYK             | 23 | 1362  | 1.16 | 0.10 | 8  |
| 10 C42D8.2a;C42D8.2b | SVQSVRAYTPIK         | 30 | 3796  | 1.16 | 0.14 | 12 |
| 10 C42D8.2a;C42D8.2b | NSFLPK               | 21 | 684   | 1.16 | 0.08 | 7  |
| 7 C42D8.2a;C42D8.2b  | RNFEIVYK             | 39 | 3821  | 1.17 | 0.11 | 10 |
| 22 C42D8.2a;C42D8.2b | EAIDALRLLK           | 16 | 1966  | 1.17 | 0.11 | 9  |
| 10 C42D8.2a;C42D8.2b | AARLNQINAVAEYK       | 31 | 3270  | 1.18 | 0.09 | 7  |
| 10 C42D8.2a;C42D8.2b | LVLEENHSIK           | 26 | 8516  | 1.18 | 0.15 | 13 |
| 22 C42D8.2a;C42D8.2b | NVQVPRVYLPSIAQRSVK   | 17 | 2027  | 1.18 | 0.29 | 24 |
| 10 C42D8.2a;C42D8.2b | RNFEIVYK             | 34 | 6346  | 1.18 | 0.09 | 8  |
| 1 C42D8.2a;C42D8.2b  | LVLEENHSIK           | 37 | 1782  | 1.18 | 0.12 | 10 |
| 10 C42D8.2a;C42D8.2b | YFAQIGFSQQHMDK       | 43 | 1836  | 1.19 | 0.14 | 12 |
| 22 C42D8.2a;C42D8.2b | NVQVPRVYLPSIAQRSVK   | 10 | 2052  | 1.19 | 0.28 | 24 |
| 22 C42D8.2a;C42D8.2b | TQLPSYSRK            | 26 | 5739  | 1.19 | 0.30 | 25 |
| 7 C42D8.2a;C42D8.2b  | TQLPSYSRK            | 10 | 2017  | 1.20 | 0.18 | 15 |
| 1 C42D8.2a;C42D8.2b  | IQAVAGMK             | 29 | 1387  | 1.20 | 0.14 | 12 |
| 10 C42D8.2a;C42D8.2b | EAIDALRLLK           | 15 | 1032  | 1.20 | 0.06 | 5  |
| 10 C42D8.2a;C42D8.2b | YVQMALEK             | 38 | 2222  | 1.21 | 0.07 | 5  |
| 1 C42D8.2a;C42D8.2b  | TQLPSYSRK            | 15 | 3842  | 1.21 | 0.12 | 10 |
| 22 C42D8.2a;C42D8.2b | RNFEIVYK             | 20 | 4112  | 1.22 | 0.09 | 7  |
| 22 C42D8.2a;C42D8.2b | SVQSVRAYTPIK         | 17 | 3484  | 1.22 | 0.17 | 14 |
| 10 C42D8.2a;C42D8.2b | YFAQIGFSQQHMDK       | 29 | 703   | 1.22 | 0.10 | 8  |
| 10 C42D8.2a;C42D8.2b | YFAQIGFSQQHMDK       | 30 | 2300  | 1.22 | 0.13 | 11 |
| 22 C42D8.2a;C42D8.2b | LVLEENHSIK           | 11 | 5798  | 1.23 | 0.11 | 9  |
| 10 C42D8.2a;C42D8.2b | YVQMALEK             | 25 | 665   | 1.23 | 0.07 | 5  |
| 7 C42D8.2a;C42D8.2b  | YFAQIGFSQQHMDK       | 32 | 1486  | 1.24 | 0.11 | 9  |
| 1 C42D8.2a;C42D8.2b  | YFAQIGFSQQHMDK       | 13 | 874   | 1.24 | 0.11 | 9  |
| 22 C42D8.2a;C42D8.2b | RNFEIVYK             | 12 | 3628  | 1.25 | 0.09 | 7  |
| 7 C42D8.2a;C42D8.2b  | EAIDALRLLK           | 14 | 3384  | 1.25 | 0.10 | 8  |
| 1 C42D8.2a;C42D8.2b  | EAIDALRLLK           | 23 | 1236  | 1.26 | 0.16 | 13 |
| 10 C42D8.2a;C42D8.2b | TQLPSYSRK            | 16 | 6925  | 1.26 | 0.08 | 6  |
| 1 C42D8.2a;C42D8.2b  | TQLPSYSRK            | 20 | 4203  | 1.26 | 0.11 | 9  |
| 22 C42D8.2a;C42D8.2b | IQSLMEHALAIAGTK      | 64 | 805   | 1.26 | 0.20 | 16 |
| 22 C42D8.2a;C42D8.2b | FAESRVAK             | 12 | 4597  | 1.26 | 0.02 | 1  |
| 10 C42D8.2a;C42D8.2b | SINFDK               | 15 | 3855  | 1.26 | 0.20 | 16 |
| 1 C42D8.2a;C42D8.2b  | RNFEIVYK             | 12 | 1506  | 1.27 | 0.10 | 8  |
| 1 C42D8.2a;C42D8.2b  | LVLEENHSIK           | 22 | 911   | 1.27 | 0.15 | 12 |
| 10 C42D8.2a;C42D8.2b | TQLPSYSRK            | 13 | 7838  | 1.27 | 0.09 | 7  |
| 10 C42D8.2a;C42D8.2b | EIHETLYVK            | 42 | 5660  | 1.27 | 0.10 | 8  |
| 1 C42D8.2a;C42D8.2b  | YFAQIGFSQQHMDK       | 20 | 420   | 1.27 | 0.24 | 19 |
| 22 C42D8.2a;C42D8.2b | RAVVNMISFNPIAPRNEIEK | 12 | 2313  | 1.27 | 0.19 | 15 |
| 10 C42D8.2a;C42D8.2b | HQLTEASGSVCK         | 10 | 761   | 1.27 | 0.02 | 2  |
| 10 C42D8.2a;C42D8.2b | EIHETLYVK            | 47 | 9283  | 1.27 | 0.13 | 10 |
| 10 C42D8.2a;C42D8.2b | YFAQIGFSQQHMDK       | 36 | 1653  | 1.28 | 0.08 | 6  |

|                      |                     |    |       |      |      |    |
|----------------------|---------------------|----|-------|------|------|----|
| 22 C42D8.2a;C42D8.2b | TQLPSYSRK           | 20 | 3001  | 1.28 | 0.11 | 8  |
| 7 C42D8.2a;C42D8.2b  | EIHETLYVK           | 23 | 2955  | 1.29 | 0.18 | 14 |
| 10 C42D8.2a;C42D8.2b | YVQMALEK            | 47 | 2261  | 1.29 | 0.12 | 9  |
| 22 C42D8.2a;C42D8.2b | IQSLMEHALAIAGTK     | 60 | 1064  | 1.29 | 0.14 | 11 |
| 22 C42D8.2a;C42D8.2b | TQLPSYSRK           | 15 | 10243 | 1.29 | 0.08 | 6  |
| 10 C42D8.2a;C42D8.2b | TIQETPFPSQSIAEALIK  | 66 | 3965  | 1.30 | 0.18 | 14 |
| 22 C42D8.2a;C42D8.2b | SVQSVRAYTPIK        | 18 | 3169  | 1.30 | 0.25 | 19 |
| 22 C42D8.2a;C42D8.2b | TQLPSYSRK           | 23 | 2992  | 1.30 | 0.23 | 18 |
| 22 C42D8.2a;C42D8.2b | TQLPSYSRK           | 11 | 3571  | 1.31 | 0.11 | 9  |
| 22 C42D8.2a;C42D8.2b | HQLTEASGSVCK        | 85 | 2281  | 1.31 | 0.14 | 11 |
| 10 C42D8.2a;C42D8.2b | EIHETLYVK           | 30 | 6669  | 1.31 | 0.07 | 5  |
| 1 C42D8.2a;C42D8.2b  | TQLPSYSRK           | 11 | 4335  | 1.32 | 0.07 | 5  |
| 10 C42D8.2a;C42D8.2b | ESEVRSLYTVNVNGQEVMK | 30 | 8155  | 1.32 | 0.06 | 5  |
| 22 C42D8.2a;C42D8.2b | LVLEENHSIK          | 14 | 7361  | 1.32 | 0.10 | 8  |
| 22 C42D8.2a;C42D8.2b | YVQMALEK            | 38 | 2917  | 1.32 | 0.09 | 7  |
| 10 C42D8.2a;C42D8.2b | TQLPSYSRK           | 12 | 14078 | 1.32 | 0.07 | 5  |
| 1 C42D8.2a;C42D8.2b  | YVQMALEK            | 23 | 742   | 1.32 | 0.15 | 11 |
| 7 C42D8.2a;C42D8.2b  | AARLNQINAVAIEYK     | 18 | 991   | 1.32 | 0.20 | 15 |
| 1 C42D8.2a;C42D8.2b  | TQLPSYSRK           | 10 | 1993  | 1.33 | 0.10 | 7  |
| 22 C42D8.2a;C42D8.2b | HQLTEASGSVCK        | 77 | 3055  | 1.33 | 0.20 | 15 |
| 10 C42D8.2a;C42D8.2b | TQLPSYSRK           | 11 | 7277  | 1.33 | 0.10 | 7  |
| 1 C42D8.2a;C42D8.2b  | EIHETLYVK           | 27 | 3266  | 1.33 | 0.17 | 13 |
| 10 C42D8.2a;C42D8.2b | YVQMALEK            | 22 | 1697  | 1.34 | 0.11 | 8  |
| 22 C42D8.2a;C42D8.2b | TQLPSYSRK           | 13 | 4836  | 1.34 | 0.09 | 7  |
| 1 C42D8.2a;C42D8.2b  | SVQSVRAYTPIK        | 15 | 1513  | 1.34 | 0.42 | 32 |
| 22 C42D8.2a;C42D8.2b | IQSLMEHALAIAGTK     | 65 | 1394  | 1.34 | 0.17 | 13 |
| 10 C42D8.2a;C42D8.2b | TQLPSYSRK           | 17 | 7892  | 1.35 | 0.34 | 25 |
| 1 C42D8.2a;C42D8.2b  | MHLIK               | 13 | 1130  | 1.35 | 0.22 | 16 |
| 10 C42D8.2a;C42D8.2b | IQAVAGMK            | 35 | 1475  | 1.35 | 0.20 | 15 |
| 22 C42D8.2a;C42D8.2b | IQAVAGMK            | 15 | 624   | 1.36 | 0.17 | 12 |
| 1 C42D8.2a;C42D8.2b  | TQLPSYSRK           | 11 | 5736  | 1.36 | 0.14 | 10 |
| 10 C42D8.2a;C42D8.2b | TQLPSYSRK           | 14 | 7213  | 1.37 | 0.10 | 7  |
| 22 C42D8.2a;C42D8.2b | FPTTLGLPLTISGK      | 11 | 866   | 1.37 | 0.15 | 11 |
| 22 C42D8.2a;C42D8.2b | IQSLMEHALAIAGTK     | 64 | 1751  | 1.37 | 0.19 | 14 |
| 22 C42D8.2a;C42D8.2b | YVQMALEK            | 36 | 4969  | 1.37 | 0.07 | 5  |
| 10 C42D8.2a;C42D8.2b | SVQSVRAYTPIK        | 24 | 4942  | 1.38 | 0.11 | 8  |
| 22 C42D8.2a;C42D8.2b | IQSLMEHALAIAGTK     | 78 | 1537  | 1.38 | 0.09 | 7  |
| 10 C42D8.2a;C42D8.2b | YFAQIGFSQQHMDK      | 37 | 1353  | 1.39 | 0.16 | 11 |
| 10 C42D8.2a;C42D8.2b | FAESRVAK            | 15 | 5179  | 1.40 | 0.14 | 10 |
| 22 C42D8.2a;C42D8.2b | TQLPSYSRK           | 11 | 6766  | 1.41 | 0.09 | 6  |
| 7 C42D8.2a;C42D8.2b  | RNFEIVYK            | 23 | 6639  | 1.41 | 0.24 | 17 |
| 7 C42D8.2a;C42D8.2b  | EIHETLYVK           | 27 | 2287  | 1.41 | 0.15 | 11 |
| 1 C42D8.2a;C42D8.2b  | TIQETPFPSQSIAEALIK  | 28 | 1263  | 1.43 | 0.14 | 10 |
| 10 C42D8.2a;C42D8.2b | YVQMALEK            | 30 | 2158  | 1.45 | 0.12 | 8  |
| 10 C42D8.2a;C42D8.2b | MHLIK               | 17 | 64743 | 1.46 | 0.13 | 9  |
| 10 C42D8.2a;C42D8.2b | EIHETLYVK           | 26 | 5483  | 1.46 | 0.11 | 8  |
| 10 C42D8.2a;C42D8.2b | TIQETPFPSQSIAEALIK  | 20 | 1071  | 1.47 | 0.20 | 14 |
| 10 C42D8.2a;C42D8.2b | TQLPSYSRK           | 14 | 3890  | 1.47 | 0.14 | 9  |
| 10 C42D8.2a;C42D8.2b | MHLIK               | 18 | 61002 | 1.47 | 0.09 | 6  |
| 7 C42D8.2a;C42D8.2b  | SVQSVRAYTPIK        | 17 | 2377  | 1.47 | 0.10 | 7  |
| 1 C42D8.2a;C42D8.2b  | TQLPSYSRK           | 13 | 2183  | 1.49 | 0.15 | 10 |
| 22 C42D8.2a;C42D8.2b | YVQMALEK            | 46 | 3789  | 1.49 | 0.07 | 5  |
| 7 C42D8.2a;C42D8.2b  | LVLEENHSIK          | 31 | 6667  | 1.50 | 0.21 | 14 |
| 22 C42D8.2a;C42D8.2b | YVQMALEK            | 31 | 2737  | 1.51 | 0.09 | 6  |
| 22 C42D8.2a;C42D8.2b | YVQMALEK            | 37 | 4958  | 1.51 | 0.04 | 3  |
| 22 C42D8.2a;C42D8.2b | EIHETLYVK           | 57 | 10136 | 1.51 | 0.06 | 4  |
| 1 C42D8.2a;C42D8.2b  | TQLPSYSRK           | 17 | 3030  | 1.51 | 0.05 | 4  |
| 7 C42D8.2a;C42D8.2b  | RNFEIVYK            | 11 | 1199  | 1.52 | 0.08 | 5  |
| 1 C42D8.2a;C42D8.2b  | TQLPSYSRK           | 12 | 4392  | 1.52 | 0.11 | 7  |
| 7 C42D8.2a;C42D8.2b  | IQAVAGMK            | 20 | 1358  | 1.52 | 0.19 | 12 |
| 22 C42D8.2a;C42D8.2b | YFAQIGFSQQHMDK      | 38 | 2204  | 1.52 | 0.14 | 9  |
| 7 C42D8.2a;C42D8.2b  | EIHETLYVK           | 38 | 7729  | 1.52 | 0.22 | 14 |
| 1 C42D8.2a;C42D8.2b  | RNFEIVYK            | 18 | 474   | 1.52 | 0.15 | 10 |
| 1 C42D8.2a;C42D8.2b  | YVQMALEK            | 26 | 1194  | 1.53 | 0.15 | 10 |
| 22 C42D8.2a;C42D8.2b | FLRVFMQQYK          | 17 | 443   | 1.54 | 0.10 | 7  |
| 22 C42D8.2a;C42D8.2b | NVQVPRVYLPISIAQRSVK | 36 | 2188  | 1.54 | 0.24 | 15 |
| 10 C42D8.2a;C42D8.2b | ESEVRSLYTVNVNGQEVMK | 31 | 5690  | 1.54 | 0.17 | 11 |
| 22 C42D8.2a;C42D8.2b | SINFDK              | 11 | 2370  | 1.55 | 0.28 | 18 |
| 22 C42D8.2a;C42D8.2b | RNFEIVYK            | 21 | 1028  | 1.58 | 0.09 | 6  |
| 10 C42D8.2a;C42D8.2b | AARLNQINAVAIEYK     | 13 | 1627  | 1.58 | 0.13 | 8  |
| 7 C42D8.2a;C42D8.2b  | LVLEENHSIK          | 22 | 2024  | 1.58 | 0.15 | 9  |
| 22 C42D8.2a;C42D8.2b | YVQMALEK            | 41 | 3436  | 1.58 | 0.07 | 4  |
| 10 C42D8.2a;C42D8.2b | RNFEIVYK            | 23 | 4907  | 1.59 | 0.06 | 4  |
| 10 C42D8.2a;C42D8.2b | YFAQIGFSQQHMDK      | 36 | 1117  | 1.60 | 0.07 | 4  |
| 7 C42D8.2a;C42D8.2b  | YVQMALEK            | 12 | 1269  | 1.60 | 0.12 | 8  |
| 10 C42D8.2a;C42D8.2b | EAIDALRLLK          | 11 | 1843  | 1.60 | 0.48 | 30 |
| 22 C42D8.2a;C42D8.2b | TQLPSYSRK           | 12 | 4827  | 1.61 | 0.11 | 7  |
| 10 C42D8.2a;C42D8.2b | SVQSVRAYTPIK        | 17 | 1968  | 1.61 | 0.11 | 7  |
| 7 C42D8.2a;C42D8.2b  | TQLPSYSRK           | 10 | 1627  | 1.61 | 0.18 | 11 |
| 7 C42D8.2a;C42D8.2b  | EIHETLYVK           | 24 | 1906  | 1.62 | 0.09 | 5  |
| 7 C42D8.2a;C42D8.2b  | EIHETLYVK           | 24 | 6118  | 1.62 | 0.15 | 9  |
| 7 C42D8.2a;C42D8.2b  | EAIDALRLLK          | 25 | 1394  | 1.62 | 0.16 | 10 |
| 7 C42D8.2a;C42D8.2b  | VLLPIYK             | 17 | 1336  | 1.63 | 0.14 | 8  |
| 10 C42D8.2a;C42D8.2b | RNFEIVYK            | 13 | 5405  | 1.63 | 0.09 | 5  |
| 10 C42D8.2a;C42D8.2b | YFAQIGFSQQHMDK      | 36 | 1633  | 1.63 | 0.18 | 11 |
| 10 C42D8.2a;C42D8.2b | SVQSVRAYTPIK        | 10 | 2874  | 1.63 | 0.10 | 6  |
| 7 C42D8.2a;C42D8.2b  | RQPLPVRK            | 16 | 4627  | 1.64 | 0.19 | 11 |
| 1 C42D8.2a;C42D8.2b  | TQLPSYSRK           | 19 | 4587  | 1.64 | 0.16 | 9  |
| 10 C42D8.2a;C42D8.2b | LVLEENHSIK          | 28 | 3855  | 1.65 | 0.05 | 3  |
| 10 C42D8.2a;C42D8.2b | YVQMALEK            | 27 | 1828  | 1.65 | 0.09 | 5  |
| 10 C42D8.2a;C42D8.2b | LVLEENHSIK          | 35 | 3414  | 1.66 | 0.13 | 8  |
| 22 C42D8.2a;C42D8.2b | ESEVRSLYTVNVNGQEVMK | 24 | 3490  | 1.66 | 0.20 | 12 |
| 1 C42D8.2a;C42D8.2b  | TIQETPFPSQSIAEALIK  | 26 | 1127  | 1.67 | 0.18 | 11 |
| 7 C42D8.2a;C42D8.2b  | SVQSVRAYTPIK        | 20 | 3069  | 1.67 | 0.13 | 8  |
| 7 C42D8.2a;C42D8.2b  | EIHETLYVK           | 18 | 8231  | 1.68 | 0.16 | 9  |
| 10 C42D8.2a;C42D8.2b | YVQMALEK            | 35 | 715   | 1.68 | 0.12 | 7  |
| 7 C42D8.2a;C42D8.2b  | EIHETLYVK           | 14 | 1642  | 1.68 | 0.10 | 6  |
| 7 C42D8.2a;C42D8.2b  | TIQETPFPSQSIAEALIK  | 21 | 1314  | 1.69 | 0.19 | 11 |
| 22 C42D8.2a;C42D8.2b | TQLPSYSRK           | 18 | 3085  | 1.69 | 0.06 | 4  |
| 7 C42D8.2a;C42D8.2b  | RNFEIVYK            | 12 | 4768  | 1.71 | 0.06 | 3  |
| 10 C42D8.2a;C42D8.2b | YFAQIGFSQQHMDK      | 44 | 2185  | 1.72 | 0.12 | 7  |

|                      |                     |    |       |      |      |    |
|----------------------|---------------------|----|-------|------|------|----|
| 7 C42D8.2a;C42D8.2b  | YFAQIGFSQQHMDK      | 15 | 847   | 1.72 | 0.27 | 15 |
| 7 C42D8.2a;C42D8.2b  | YVQMALEK            | 26 | 1514  | 1.73 | 0.07 | 4  |
| 7 C42D8.2a;C42D8.2b  | SVQSVRAYTPIK        | 12 | 1012  | 1.73 | 0.10 | 6  |
| 7 C42D8.2a;C42D8.2b  | EIHETLYVK           | 10 | 5022  | 1.73 | 0.16 | 9  |
| 10 C42D8.2a;C42D8.2b | YVQMALEK            | 34 | 793   | 1.74 | 0.21 | 12 |
| 10 C42D8.2a;C42D8.2b | YFAQIGFSQQHMDK      | 19 | 2608  | 1.75 | 0.17 | 9  |
| 7 C42D8.2a;C42D8.2b  | TQLPSYSRK           | 13 | 4542  | 1.77 | 0.11 | 6  |
| 10 C42D8.2a;C42D8.2b | MHLIK               | 16 | 3158  | 1.77 | 0.15 | 8  |
| 7 C42D8.2a;C42D8.2b  | SVQSVRAYTPIK        | 17 | 746   | 1.77 | 0.12 | 7  |
| 7 C42D8.2a;C42D8.2b  | SVQSVRAYTPIK        | 19 | 830   | 1.77 | 0.30 | 17 |
| 10 C42D8.2a;C42D8.2b | YFAQIGFSQQHMDK      | 21 | 765   | 1.78 | 0.17 | 9  |
| 10 C42D8.2a;C42D8.2b | EIHETLYVK           | 47 | 7850  | 1.79 | 0.10 | 5  |
| 10 C42D8.2a;C42D8.2b | YFAQIGFSQQHMDK      | 12 | 2562  | 1.79 | 0.22 | 12 |
| 10 C42D8.2a;C42D8.2b | RNFEIVYK            | 16 | 3237  | 1.79 | 0.12 | 7  |
| 7 C42D8.2a;C42D8.2b  | SVQSVRAYTPIK        | 13 | 2135  | 1.80 | 0.12 | 7  |
| 10 C42D8.2a;C42D8.2b | YVQMALEK            | 39 | 2549  | 1.81 | 0.08 | 5  |
| 1 C42D8.2a;C42D8.2b  | AARLNQINAVAEYK      | 19 | 728   | 1.81 | 0.23 | 13 |
| 10 C42D8.2a;C42D8.2b | EIHETLYVK           | 55 | 7540  | 1.81 | 0.12 | 7  |
| 22 C42D8.2a;C42D8.2b | EIHETLYVK           | 41 | 6446  | 1.81 | 0.15 | 8  |
| 10 C42D8.2a;C42D8.2b | TQLPSYSRK           | 21 | 7698  | 1.82 | 0.07 | 4  |
| 22 C42D8.2a;C42D8.2b | YFAQIGFSQQHMDK      | 52 | 2703  | 1.82 | 0.12 | 7  |
| 7 C42D8.2a;C42D8.2b  | TQLPSYSRK           | 10 | 3329  | 1.83 | 0.16 | 9  |
| 7 C42D8.2a;C42D8.2b  | RQPLPVRK            | 23 | 557   | 1.83 | 0.16 | 9  |
| 22 C42D8.2a;C42D8.2b | SVQSVRAYTPIK        | 24 | 6888  | 1.83 | 0.11 | 6  |
| 10 C42D8.2a;C42D8.2b | EIHETLYVK           | 29 | 6166  | 1.84 | 0.11 | 6  |
| 10 C42D8.2a;C42D8.2b | YFAQIGFSQQHMDK      | 14 | 3106  | 1.85 | 0.16 | 9  |
| 1 C42D8.2a;C42D8.2b  | IQAVAGMK            | 34 | 1385  | 1.85 | 0.18 | 10 |
| 1 C42D8.2a;C42D8.2b  | YVQMALEK            | 23 | 1100  | 1.85 | 0.15 | 8  |
| 7 C42D8.2a;C42D8.2b  | TQLPSYSRK           | 12 | 3993  | 1.85 | 0.10 | 5  |
| 10 C42D8.2a;C42D8.2b | IQAVAGMK            | 30 | 2393  | 1.86 | 0.21 | 11 |
| 10 C42D8.2a;C42D8.2b | YFAQIGFSQQHMDK      | 29 | 1202  | 1.86 | 0.19 | 10 |
| 1 C42D8.2a;C42D8.2b  | TQLPSYSRK           | 13 | 1833  | 1.87 | 0.19 | 10 |
| 22 C42D8.2a;C42D8.2b | SVQSVRAYTPIK        | 24 | 5591  | 1.87 | 0.17 | 9  |
| 22 C42D8.2a;C42D8.2b | IQSLMEHALAIAGTK     | 46 | 1366  | 1.88 | 0.20 | 11 |
| 22 C42D8.2a;C42D8.2b | YFAQIGFSQQHMDK      | 20 | 1781  | 1.89 | 0.11 | 6  |
| 7 C42D8.2a;C42D8.2b  | RQPLPVRK            | 10 | 305   | 1.89 | 0.10 | 6  |
| 7 C42D8.2a;C42D8.2b  | LVLEENHSIK          | 26 | 7710  | 1.90 | 0.07 | 4  |
| 22 C42D8.2a;C42D8.2b | SVQSVRAYTPIK        | 16 | 2800  | 1.91 | 0.20 | 11 |
| 22 C42D8.2a;C42D8.2b | TQLPSYSRK           | 11 | 3041  | 1.93 | 0.14 | 7  |
| 22 C42D8.2a;C42D8.2b | YFAQIGFSQQHMDK      | 12 | 3094  | 1.94 | 0.11 | 6  |
| 22 C42D8.2a;C42D8.2b | NSFLPK              | 10 | 1217  | 1.94 | 0.36 | 19 |
| 22 C42D8.2a;C42D8.2b | TQLPSYSRK           | 18 | 5891  | 1.95 | 0.12 | 6  |
| 22 C42D8.2a;C42D8.2b | IQSLMEHALAIAGTK     | 59 | 948   | 1.96 | 0.15 | 7  |
| 10 C42D8.2a;C42D8.2b | HQLTEASGSVCK        | 15 | 1755  | 1.97 | 0.15 | 7  |
| 10 C42D8.2a;C42D8.2b | MHLIK               | 24 | 31233 | 1.97 | 0.08 | 4  |
| 10 C42D8.2a;C42D8.2b | LVLEENHSIK          | 58 | 6839  | 1.98 | 0.10 | 5  |
| 10 C42D8.2a;C42D8.2b | RNFEIVYK            | 40 | 3815  | 1.98 | 0.09 | 4  |
| 7 C42D8.2a;C42D8.2b  | TQLPSYSRK           | 17 | 3729  | 1.98 | 0.12 | 6  |
| 10 C42D8.2a;C42D8.2b | RNFEIVYK            | 38 | 2707  | 1.98 | 0.07 | 3  |
| 10 C42D8.2a;C42D8.2b | YVQMALEK            | 12 | 1781  | 1.99 | 0.12 | 6  |
| 7 C42D8.2a;C42D8.2b  | EIHETLYVK           | 27 | 5014  | 1.99 | 0.12 | 6  |
| 22 C42D8.2a;C42D8.2b | TQLPSYSRK           | 15 | 3601  | 2.00 | 0.15 | 8  |
| 22 C42D8.2a;C42D8.2b | IQAVAGMK            | 23 | 1241  | 2.03 | 0.36 | 17 |
| 10 C42D8.2a;C42D8.2b | HQLTEASGSVCK        | 16 | 2018  | 2.04 | 0.08 | 4  |
| 22 C42D8.2a;C42D8.2b | TELSQIK             | 23 | 3902  | 2.04 | 0.11 | 5  |
| 10 C42D8.2a;C42D8.2b | HQLTEASGSVCK        | 13 | 1834  | 2.04 | 0.19 | 9  |
| 10 C42D8.2a;C42D8.2b | SVQSVRAYTPIK        | 29 | 1950  | 2.05 | 0.14 | 7  |
| 22 C42D8.2a;C42D8.2b | TQLPSYSRK           | 15 | 5355  | 2.05 | 0.07 | 4  |
| 7 C42D8.2a;C42D8.2b  | RQPLPVRK            | 12 | 2352  | 2.07 | 0.14 | 7  |
| 7 C42D8.2a;C42D8.2b  | LVLEENHSIK          | 19 | 2505  | 2.08 | 0.13 | 6  |
| 10 C42D8.2a;C42D8.2b | TQLPSYSRK           | 16 | 4196  | 2.08 | 0.10 | 5  |
| 22 C42D8.2a;C42D8.2b | MHLIK               | 14 | 2217  | 2.10 | 0.17 | 8  |
| 10 C42D8.2a;C42D8.2b | RNFEIVYK            | 37 | 4040  | 2.12 | 0.13 | 6  |
| 7 C42D8.2a;C42D8.2b  | RQPLPVRK            | 12 | 3448  | 2.13 | 0.12 | 6  |
| 10 C42D8.2a;C42D8.2b | TQLPSYSRK           | 20 | 4303  | 2.13 | 0.13 | 6  |
| 7 C42D8.2a;C42D8.2b  | RNFEIVYK            | 19 | 926   | 2.15 | 0.15 | 7  |
| 7 C42D8.2a;C42D8.2b  | SVQSVRAYTPIK        | 23 | 1563  | 2.15 | 0.19 | 9  |
| 1 C42D8.2a;C42D8.2b  | MHLIK               | 16 | 4023  | 2.16 | 0.18 | 8  |
| 10 C42D8.2a;C42D8.2b | SVQSVRAYTPIK        | 14 | 1987  | 2.16 | 0.14 | 6  |
| 10 C42D8.2a;C42D8.2b | YFAQIGFSQQHMDK      | 38 | 1063  | 2.18 | 0.15 | 7  |
| 10 C42D8.2a;C42D8.2b | MHLIK               | 18 | 27621 | 2.19 | 0.07 | 3  |
| 10 C42D8.2a;C42D8.2b | IQAVAGMK            | 33 | 1815  | 2.22 | 0.21 | 10 |
| 10 C42D8.2a;C42D8.2b | SVQSVRAYTPIK        | 35 | 7083  | 2.23 | 0.12 | 5  |
| 7 C42D8.2a;C42D8.2b  | YVQMALEK            | 27 | 1604  | 2.24 | 0.20 | 9  |
| 22 C42D8.2a;C42D8.2b | LVLEENHSIK          | 40 | 4237  | 2.24 | 0.14 | 6  |
| 10 C42D8.2a;C42D8.2b | TQLPSYSRK           | 14 | 6814  | 2.24 | 0.10 | 4  |
| 7 C42D8.2a;C42D8.2b  | EAIDALRLLK          | 23 | 1414  | 2.25 | 0.18 | 8  |
| 10 C42D8.2a;C42D8.2b | TQLPSYSRK           | 15 | 5678  | 2.27 | 0.11 | 5  |
| 10 C42D8.2a;C42D8.2b | YFAQIGFSQQHMDK      | 62 | 1263  | 2.27 | 0.12 | 5  |
| 22 C42D8.2a;C42D8.2b | FLRVFMQQYK          | 13 | 473   | 2.29 | 0.17 | 8  |
| 22 C42D8.2a;C42D8.2b | IQAVAGMK            | 48 | 2493  | 2.29 | 0.13 | 6  |
| 22 C42D8.2a;C42D8.2b | ESEVRSLYTVNVNGQEVMK | 27 | 3117  | 2.29 | 0.19 | 8  |
| 1 C42D8.2a;C42D8.2b  | AARLNQINAVAEYK      | 23 | 489   | 2.31 | 0.31 | 14 |
| 10 C42D8.2a;C42D8.2b | TQLPSYSRK           | 19 | 3508  | 2.31 | 0.13 | 6  |
| 10 C42D8.2a;C42D8.2b | RNFEIVYK            | 38 | 2805  | 2.32 | 0.10 | 4  |
| 10 C42D8.2a;C42D8.2b | MHLIK               | 17 | 31131 | 2.32 | 0.04 | 2  |
| 10 C42D8.2a;C42D8.2b | LVLEENHSIK          | 33 | 5033  | 2.33 | 0.05 | 2  |
| 7 C42D8.2a;C42D8.2b  | YVQMALEK            | 10 | 1934  | 2.33 | 0.14 | 6  |
| 10 C42D8.2a;C42D8.2b | TQLPSYSRK           | 27 | 7604  | 2.36 | 0.08 | 3  |
| 22 C42D8.2a;C42D8.2b | MHLIK               | 15 | 2161  | 2.37 | 0.25 | 10 |
| 10 C42D8.2a;C42D8.2b | HQLTEASGSVCK        | 64 | 2233  | 2.37 | 0.13 | 5  |
| 10 C42D8.2a;C42D8.2b | MHLIK               | 15 | 1985  | 2.38 | 0.24 | 10 |
| 1 C42D8.2a;C42D8.2b  | HQLTEASGSVCK        | 55 | 1522  | 2.39 | 0.11 | 5  |
| 7 C42D8.2a;C42D8.2b  | SVQSVRAYTPIK        | 27 | 3241  | 2.39 | 0.15 | 6  |
| 10 C42D8.2a;C42D8.2b | LVLEENHSIK          | 45 | 6035  | 2.40 | 0.12 | 5  |
| 10 C42D8.2a;C42D8.2b | AARLNQINAVAEYK      | 65 | 2912  | 2.41 | 0.11 | 5  |
| 7 C42D8.2a;C42D8.2b  | SVQSVRAYTPIK        | 12 | 1432  | 2.45 | 0.09 | 4  |
| 10 C42D8.2a;C42D8.2b | IQAVAGMK            | 51 | 1797  | 2.45 | 0.07 | 3  |
| 22 C42D8.2a;C42D8.2b | TELSQIK             | 28 | 4383  | 2.48 | 0.10 | 4  |
| 7 C42D8.2a;C42D8.2b  | SVQSVRAYTPIK        | 29 | 960   | 2.49 | 0.43 | 17 |
| 10 C42D8.2a;C42D8.2b | TQLPSYSRK           | 14 | 4457  | 2.49 | 0.21 | 8  |

|                      |                      |    |       |      |      |     |
|----------------------|----------------------|----|-------|------|------|-----|
| 10 C42D8.2a;C42D8.2b | AARLNQINAVAEYK       | 28 | 2868  | 2.50 | 0.10 | 4   |
| 10 C42D8.2a;C42D8.2b | LVLEENHSIK           | 48 | 3876  | 2.52 | 0.10 | 4   |
| 22 C42D8.2a;C42D8.2b | IQSLMEHALAAGTK       | 74 | 1489  | 2.52 | 0.14 | 5   |
| 7 C42D8.2a;C42D8.2b  | YVQMALEK             | 11 | 2234  | 2.53 | 0.12 | 5   |
| 22 C42D8.2a;C42D8.2b | AARLNQINAVAEYK       | 26 | 2393  | 2.57 | 0.24 | 9   |
| 7 C42D8.2a;C42D8.2b  | YVQMALEK             | 26 | 1886  | 2.58 | 0.11 | 4   |
| 7 C42D8.2a;C42D8.2b  | VLLPIYK              | 12 | 1954  | 2.59 | 0.10 | 4   |
| 7 C42D8.2a;C42D8.2b  | VLLPIYK              | 12 | 1211  | 2.63 | 0.13 | 5   |
| 7 C42D8.2a;C42D8.2b  | YFAQIGFSQQHMDK       | 48 | 1320  | 2.65 | 0.12 | 4   |
| 10 C42D8.2a;C42D8.2b | SVQSVRAYTPIK         | 24 | 1989  | 2.68 | 0.20 | 7   |
| 7 C42D8.2a;C42D8.2b  | EIHETLYVK            | 17 | 3654  | 2.76 | 0.13 | 5   |
| 10 C42D8.2a;C42D8.2b | IQAVAGMK             | 43 | 2209  | 2.78 | 0.30 | 11  |
| 22 C42D8.2a;C42D8.2b | LVLEENHSIK           | 31 | 3104  | 2.84 | 0.08 | 3   |
| 7 C42D8.2a;C42D8.2b  | VLLPIYK              | 11 | 796   | 2.85 | 0.10 | 4   |
| 7 C42D8.2a;C42D8.2b  | MHLIK                | 13 | 1440  | 2.88 | 0.13 | 5   |
| 10 C42D8.2a;C42D8.2b | SVQSVRAYTPIK         | 22 | 2855  | 2.90 | 0.16 | 5   |
| 7 C42D8.2a;C42D8.2b  | YFAQIGFSQQHMDK       | 38 | 1191  | 2.91 | 0.14 | 5   |
| 10 C42D8.2a;C42D8.2b | NIRPLVREDK           | 11 | 9471  | 2.94 | 0.12 | 4   |
| 10 C42D8.2a;C42D8.2b | AARLNQINAVAEYK       | 33 | 1968  | 2.96 | 0.17 | 6   |
| 7 C42D8.2a;C42D8.2b  | VLLPIYK              | 14 | 1794  | 2.98 | 0.23 | 8   |
| 10 C42D8.2a;C42D8.2b | AARLNQINAVAEYK       | 58 | 2107  | 3.01 | 0.14 | 5   |
| 10 C42D8.2a;C42D8.2b | IQAVAGMK             | 44 | 2191  | 3.01 | 0.14 | 5   |
| 7 C42D8.2a;C42D8.2b  | EIHETLYVK            | 18 | 1434  | 3.06 | 0.12 | 4   |
| 10 C42D8.2a;C42D8.2b | SVQSVRAYTPIK         | 22 | 4069  | 3.08 | 0.36 | 12  |
| 7 C42D8.2a;C42D8.2b  | TQLPSYSRK            | 12 | 1556  | 3.15 | 0.10 | 3   |
| 10 C42D8.2a;C42D8.2b | MHLIK                | 16 | 2453  | 3.26 | 0.26 | 8   |
| 1 C42D8.2a;C42D8.2b  | HQLTEASGSVCK         | 52 | 1168  | 3.26 | 0.10 | 3   |
| 7 C42D8.2a;C42D8.2b  | VLLPIYK              | 17 | 1260  | 3.27 | 0.12 | 4   |
| 22 C42D8.2a;C42D8.2b | RNFEIVYK             | 28 | 1844  | 3.29 | 0.09 | 3   |
| 10 C42D8.2a;C42D8.2b | SINFDK               | 12 | 1526  | 3.31 | 0.60 | 18  |
| 22 C42D8.2a;C42D8.2b | RNFEIVYK             | 25 | 1326  | 3.44 | 0.10 | 3   |
| 1 C42D8.2a;C42D8.2b  | MHLIK                | 12 | 2742  | 3.45 | 0.10 | 3   |
| 22 C42D8.2a;C42D8.2b | AARLNQINAVAEYK       | 38 | 1956  | 3.47 | 0.16 | 5   |
| 10 C42D8.2a;C42D8.2b | HQLTEASGSVCK         | 81 | 6806  | 3.55 | 0.12 | 3   |
| 7 C42D8.2a;C42D8.2b  | RNFEIVYK             | 13 | 967   | 3.59 | 0.28 | 8   |
| 22 C42D8.2a;C42D8.2b | SVQSVRAYTPIK         | 39 | 5429  | 3.62 | 0.11 | 3   |
| 7 C42D8.2a;C42D8.2b  | MHLIK                | 13 | 3710  | 3.84 | 0.38 | 10  |
| 22 C42D8.2a;C42D8.2b | MHLIK                | 13 | 2335  | 3.98 | 0.30 | 7   |
| 10 C42D8.2a;C42D8.2b | IQAVAGMK             | 36 | 2957  | 3.98 | 0.27 | 7   |
| 10 C42D8.2a;C42D8.2b | IQAVAGMK             | 38 | 2171  | 4.18 | 0.17 | 4   |
| 10 C42D8.2a;C42D8.2b | HQLTEASGSVCK         | 77 | 5965  | 4.33 | 0.10 | 2   |
| 22 C42D8.2a;C42D8.2b | IQAVAGMK             | 46 | 1990  | 4.38 | 0.20 | 5   |
| 22 C42D8.2a;C42D8.2b | SINFDK               | 12 | 2849  | 4.40 | 0.43 | 10  |
| 10 C42D8.2a;C42D8.2b | MHLIK                | 17 | 3526  | 4.50 | 0.33 | 7   |
| 22 C42D8.2a;C42D8.2b | MHLIK                | 13 | 3301  | 4.67 | 0.14 | 3   |
| 22 C42D8.2a;C42D8.2b | SVQSVRAYTPIK         | 27 | 4381  | 4.71 | 0.10 | 2   |
| 22 C42D8.2a;C42D8.2b | MHLIK                | 16 | 3710  | 5.03 | 0.15 | 3   |
| 7 C42D8.2a;C42D8.2b  | RNFEIVYK             | 24 | 1282  | 5.31 | 0.19 | 4   |
| 10 C42D8.2a;C42D8.2b | DCSEPTFAVLSK         | 45 | 1933  | 5.88 | 0.61 | 10  |
| 10 C42D8.2a;C42D8.2b | IQAVAGMK             | 46 | 4235  | 6.88 | 0.22 | 3   |
| 22 C42D8.2a;C42D8.2b | MHLIK                | 11 | 5465  | 7.70 | 0.17 | 2   |
| 7 C44B12.2           | HVYPVIWK             | 10 | 2195  | 1.19 | 0.19 | 16  |
| 10 C44B12.2          | HVYPVIWK             | 17 | 7601  | 2.22 | 0.05 | 2   |
| 22 C44B12.2          | HVYPVIWK             | 13 | 2162  | 2.32 | 0.06 | 3   |
| 10 C44B12.2          | HVYPVIWK             | 13 | 9604  | 2.41 | 0.22 | 9   |
| 1 C44B7.10           | AAFDRLK              | 22 | 4343  | 0.48 | 0.22 | 47  |
| 7 C44B7.10           | VVSLAEATRDIK         | 16 | 7946  | 0.52 | 0.52 | 100 |
| 7 C44B7.10           | LVVSFVYGSTK          | 36 | 744   | 0.61 | 0.25 | 41  |
| 22 C44B7.10          | DLGIHTEMFSDGVLDLIEK  | 13 | 1524  | 0.62 | 0.24 | 39  |
| 7 C44B7.10           | LVVSFVYGSTK          | 32 | 590   | 0.74 | 0.16 | 22  |
| 10 C44B7.10          | LVVSFVYGSTK          | 14 | 419   | 0.77 | 0.17 | 22  |
| 1 C44B7.10           | LVVSFVYGSTK          | 36 | 664   | 0.80 | 0.21 | 27  |
| 1 C44B7.10           | LVVSFVYGSTK          | 46 | 635   | 0.93 | 0.21 | 22  |
| 10 C44B7.10          | LVVSFVYGSTK          | 13 | 407   | 1.29 | 0.19 | 15  |
| 1 C44B7.10           | DLGIHTEMFSDGVLDLIEK  | 59 | 1565  | 1.33 | 0.31 | 23  |
| 1 C44B7.10           | DLGIHTEMFSDGVLDLIEK  | 37 | 1980  | 1.64 | 0.26 | 16  |
| 7 C44B7.10           | VVSLAEATRDIK         | 10 | 7176  | 1.67 | 0.18 | 11  |
| 7 C44B7.10           | VVSLAEATRDIK         | 20 | 5071  | 2.48 | 0.22 | 9   |
| 7 C44B7.10           | VVSLAEATRDIK         | 12 | 8489  | 2.51 | 0.07 | 3   |
| 7 C44E4.4            | QLEYFGNINLPRDK       | 37 | 858   | 0.42 | 0.21 | 51  |
| 22 C44E4.4           | VILQEAELSARVLDGEEEEK | 30 | 5539  | 0.56 | 0.31 | 55  |
| 7 C44E4.4            | FGETELTK             | 26 | 1338  | 0.62 | 0.26 | 41  |
| 7 C44E4.4            | FGETELTK             | 15 | 1272  | 0.63 | 0.64 | 102 |
| 22 C44E4.4           | VILQEAELSARVLDGEEEEK | 29 | 5252  | 0.67 | 0.37 | 55  |
| 22 C44E4.4           | NSGSGIISVEDNQK       | 68 | 4998  | 0.72 | 0.07 | 10  |
| 22 C44E4.4           | TAEIRFNNDSEGAQK      | 67 | 9091  | 0.74 | 0.25 | 34  |
| 22 C44E4.4           | NSGSGIISVEDNQK       | 83 | 4793  | 0.78 | 0.08 | 11  |
| 10 C44E4.4           | IRRNEENPVPENSLEYWQK  | 11 | 3024  | 0.81 | 0.09 | 11  |
| 22 C44E4.4           | IRRNEENPVPENSLEYWQK  | 27 | 6709  | 0.82 | 0.13 | 16  |
| 22 C44E4.4           | NSGSGIISVEDNQK       | 53 | 4658  | 0.83 | 0.13 | 16  |
| 22 C44E4.4           | TAEIRFNNDSEGAQK      | 76 | 10305 | 0.83 | 0.21 | 26  |
| 22 C44E4.4           | IRRNEENPVPENSLEYWQK  | 27 | 8914  | 0.84 | 0.10 | 12  |
| 7 C44E4.4            | YWTEFNARK            | 13 | 1309  | 0.86 | 0.08 | 9   |
| 22 C44E4.4           | NSGSGIISVEDNQK       | 70 | 7595  | 0.88 | 0.17 | 19  |
| 22 C44E4.4           | VILQEAELSARVLDGEEEEK | 38 | 4141  | 0.88 | 0.45 | 51  |
| 22 C44E4.4           | TAEIRFNNDSEGAQK      | 41 | 12239 | 0.91 | 0.21 | 23  |
| 22 C44E4.4           | LHGSVGYVAHENGK       | 18 | 6997  | 0.93 | 0.26 | 28  |
| 22 C44E4.4           | IRRNEENPVPENSLEYWQK  | 21 | 2968  | 0.95 | 0.10 | 11  |
| 22 C44E4.4           | IRRNEENPVPENSLEYWQK  | 25 | 6832  | 0.97 | 0.12 | 13  |
| 22 C44E4.4           | IRRNEENPVPENSLEYWQK  | 34 | 7461  | 0.98 | 0.17 | 17  |
| 10 C44E4.4           | GLILAVDGLGPDSTIDSIK  | 38 | 774   | 0.99 | 0.16 | 17  |
| 22 C44E4.4           | QLEYFGNINLPRDK       | 39 | 2122  | 1.02 | 0.21 | 21  |
| 7 C44E4.4            | YWTEFNARK            | 14 | 1361  | 1.04 | 0.08 | 8   |
| 1 C44E4.4            | QLEYFGNINLPRDK       | 16 | 413   | 1.06 | 0.17 | 16  |
| 1 C44E4.4            | GLILAVDGLGPDSTIDSIK  | 43 | 770   | 1.06 | 0.11 | 11  |
| 22 C44E4.4           | IRRNEENPVPENSLEYWQK  | 18 | 2889  | 1.07 | 0.17 | 16  |
| 22 C44E4.4           | TAEIRFNNDSEGAQK      | 31 | 12851 | 1.08 | 0.19 | 18  |
| 22 C44E4.4           | VILQEAELSARVLDGEEEEK | 22 | 1954  | 1.12 | 0.30 | 27  |
| 22 C44E4.4           | GLILAVDGLGPDSTIDSIK  | 69 | 2783  | 1.15 | 0.06 | 5   |
| 10 C44E4.4           | IRRNEENPVPENSLEYWQK  | 25 | 4412  | 1.18 | 0.21 | 18  |
| 22 C44E4.4           | GLILAVDGLGPDSTIDSIK  | 93 | 3639  | 1.18 | 0.14 | 12  |

|                        |                            |    |       |       |      |     |
|------------------------|----------------------------|----|-------|-------|------|-----|
| 7 C44E4.4              | FGETELTK                   | 12 | 406   | 1.19  | 0.21 | 18  |
| 10 C44E4.4             | GLILAVDGLGPDSTIDSIK        | 34 | 960   | 1.21  | 0.13 | 10  |
| 22 C44E4.4             | GLILAVDGLGPDSTIDSIK        | 21 | 1399  | 1.27  | 0.16 | 12  |
| 10 C44E4.4             | YWTEFNARK                  | 12 | 1828  | 1.30  | 0.14 | 11  |
| 22 C44E4.4             | YWTEFNARK                  | 11 | 4292  | 1.33  | 0.11 | 8   |
| 22 C44E4.4             | VILQEAELSARVLDGEEEEK       | 43 | 3806  | 1.35  | 0.16 | 12  |
| 1 C44E4.4              | GLILAVDGLGPDSTIDSIK        | 44 | 645   | 1.35  | 0.26 | 19  |
| 10 C44E4.4             | GLILAVDGLGPDSTIDSIK        | 60 | 1115  | 1.37  | 0.15 | 11  |
| 22 C44E4.4             | QLEYFYGNIINLPRDK           | 25 | 1103  | 1.39  | 0.18 | 13  |
| 22 C44E4.4             | YWTEFNARK                  | 22 | 2224  | 1.51  | 0.11 | 8   |
| 22 C44E4.4             | VILQEAELSARVLDGEEEEK       | 51 | 4703  | 1.51  | 0.14 | 10  |
| 10 C44E4.4             | LHGSVGYVAHENG GK           | 35 | 25614 | 1.54  | 0.28 | 18  |
| 7 C44E4.4              | LHGSVGYVAHENG GK           | 11 | 4667  | 1.54  | 0.14 | 9   |
| 1 C44E4.4              | LHGSVGYVAHENG GK           | 28 | 8861  | 1.58  | 0.14 | 9   |
| 7 C44E4.4              | LHGSVGYVAHENG GK           | 38 | 15792 | 1.60  | 0.05 | 3   |
| 1 C44E4.4              | GSVFITYK                   | 14 | 1168  | 1.66  | 0.07 | 4   |
| 10 C44E4.4             | YWTEFNARK                  | 12 | 1106  | 1.67  | 0.42 | 25  |
| 22 C44E4.4             | GLILAVDGLGPDSTIDSIK        | 86 | 2351  | 1.67  | 0.16 | 10  |
| 7 C44E4.4              | LHGSVGYVAHENG GK           | 31 | 5036  | 1.68  | 0.08 | 5   |
| 22 C44E4.4             | GLILAVDGLGPDSTIDSIK        | 83 | 2021  | 1.77  | 0.09 | 5   |
| 10 C44E4.4             | LHGSVGYVAHENG GK           | 29 | 16843 | 1.79  | 0.05 | 3   |
| 1 C44E4.4              | YWTEFNARK                  | 11 | 1727  | 1.82  | 0.13 | 7   |
| 7 C44E4.4              | LHGSVGYVAHENG GK           | 10 | 4743  | 1.84  | 0.09 | 5   |
| 22 C44E4.4             | LHGSVGYVAHENG GK           | 23 | 26975 | 1.87  | 0.23 | 12  |
| 1 C44E4.4              | LHGSVGYVAHENG GK           | 43 | 17269 | 1.91  | 0.25 | 13  |
| 22 C44E4.4             | LHGSVGYVAHENG GK           | 43 | 24483 | 1.95  | 0.14 | 7   |
| 22 C44E4.4             | GLILAVDGLGPDSTIDSIK        | 25 | 1476  | 2.00  | 0.16 | 8   |
| 1 C44E4.4              | GSVFITYK                   | 13 | 1213  | 2.30  | 0.17 | 7   |
| 22 C44E4.4             | LHGSVGYVAHENG GK           | 44 | 17971 | 3.15  | 0.13 | 4   |
| 10 C44E4.4             | LHGSVGYVAHENG GK           | 48 | 11962 | 5.78  | 0.26 | 4   |
| 10 C44E4.4             | LHGSVGYVAHENG GK           | 41 | 7498  | 8.96  | 0.26 | 3   |
| 10 C44E4.4             | GLILAVDGLGPDSTIDSIK        | 69 | 2434  | 55.62 | 0.18 | 0   |
| 10 C45B11.3            | LPGTIYTAAAEIEK             | 35 | 2236  | 0.52  | 0.22 | 41  |
| 1 C45B11.3             | LPGTIYTAAAEIEK             | 28 | 1099  | 0.61  | 0.09 | 15  |
| 10 C45B11.3            | TVFITGASRGIGK              | 19 | 2867  | 0.84  | 0.12 | 14  |
| 10 C46F11.2a;C46F11.2b | RLNGLYESGLK                | 47 | 6127  | 0.07  | 0.49 | 733 |
| 10 C46F11.2a;C46F11.2b | ELNLERVGVK                 | 43 | 15859 | 0.14  | 0.49 | 343 |
| 10 C46F11.2a;C46F11.2b | RLNGLYESGLK                | 44 | 7836  | 0.17  | 0.59 | 356 |
| 10 C46F11.2a;C46F11.2b | ELNLERVGVK                 | 28 | 11385 | 0.25  | 0.53 | 210 |
| 10 C46F11.2a;C46F11.2b | VQTLIWAIGRDPLTK            | 27 | 1617  | 0.29  | 0.12 | 43  |
| 10 C46F11.2a;C46F11.2b | SRFNPMLFAVTK               | 20 | 1538  | 0.29  | 0.17 | 58  |
| 10 C46F11.2a;C46F11.2b | NTQVTEVIK                  | 29 | 5093  | 0.32  | 0.22 | 69  |
| 10 C46F11.2a;C46F11.2b | GDDGLLTIK                  | 44 | 4880  | 0.36  | 0.11 | 31  |
| 10 C46F11.2a;C46F11.2b | NTLIAVGGKPTIPNIK           | 25 | 14244 | 0.36  | 0.13 | 37  |
| 10 C46F11.2a;C46F11.2b | VQTLIWAIGRDPLTK            | 39 | 1399  | 0.37  | 0.12 | 32  |
| 10 C46F11.2a;C46F11.2b | NTLIAVGGKPTIPNIK           | 47 | 3916  | 0.38  | 0.25 | 65  |
| 10 C46F11.2a;C46F11.2b | GDDGLLTIK                  | 51 | 7436  | 0.47  | 0.14 | 30  |
| 22 C46F11.2a;C46F11.2b | GDDGLLTIK                  | 59 | 13580 | 0.54  | 0.08 | 15  |
| 22 C46F11.2a;C46F11.2b | MLSDELTAADMDEETNPLHLHK     | 23 | 3105  | 0.55  | 0.14 | 26  |
| 22 C46F11.2a;C46F11.2b | GDDGLLTIK                  | 47 | 15345 | 0.56  | 0.14 | 25  |
| 1 C46F11.2a;C46F11.2b  | ELNLERVGVK                 | 55 | 18827 | 0.57  | 0.13 | 22  |
| 1 C46F11.2a;C46F11.2b  | ELNLERVGVK                 | 54 | 15192 | 0.59  | 0.12 | 20  |
| 10 C46F11.2a;C46F11.2b | SGHIIVDEYQNTSAPGILSVGDDTGK | 44 | 5871  | 0.62  | 0.19 | 31  |
| 22 C46F11.2a;C46F11.2b | MLSDELTAADMDEETNPLHLHK     | 19 | 3620  | 0.62  | 0.22 | 36  |
| 10 C46F11.2a;C46F11.2b | SGHIIVDEYQNTSAPGILSVGDDTGK | 60 | 4182  | 0.65  | 0.13 | 19  |
| 22 C46F11.2a;C46F11.2b | MLSDELTAADMDEETNPLHLHK     | 44 | 2942  | 0.70  | 0.20 | 28  |
| 10 C46F11.2a;C46F11.2b | SGHIIVDEYQNTSAPGILSVGDDTGK | 70 | 6258  | 0.77  | 0.13 | 17  |
| 10 C46F11.2a;C46F11.2b | NTLIAVGGKPTIPNIK           | 53 | 4619  | 0.77  | 0.12 | 15  |
| 22 C46F11.2a;C46F11.2b | MLSDELTAADMDEETNPLHLHK     | 49 | 6135  | 0.82  | 0.13 | 16  |
| 22 C46F11.2a;C46F11.2b | SRFNPMLFAVTK               | 23 | 3339  | 0.83  | 0.17 | 20  |
| 10 C46F11.2a;C46F11.2b | SGHIIVDEYQNTSAPGILSVGDDTGK | 46 | 6252  | 0.90  | 0.13 | 15  |
| 22 C46F11.2a;C46F11.2b | ELNLERVGVK                 | 50 | 16569 | 0.91  | 0.15 | 16  |
| 22 C46F11.2a;C46F11.2b | NTLIAVGGKPTIPNIK           | 37 | 3519  | 0.91  | 0.20 | 22  |
| 22 C46F11.2a;C46F11.2b | MLSDELTAADMDEETNPLHLHK     | 34 | 5497  | 0.93  | 0.12 | 12  |
| 22 C46F11.2a;C46F11.2b | ELNLERVGVK                 | 50 | 18230 | 0.94  | 0.11 | 12  |
| 1 C46F11.2a;C46F11.2b  | SRFNPMLFAVTK               | 43 | 1523  | 0.94  | 0.09 | 9   |
| 1 C46F11.2a;C46F11.2b  | SRFNPMLFAVTK               | 25 | 1297  | 0.95  | 0.19 | 20  |
| 10 C46F11.2a;C46F11.2b | MLSDELTAADMDEETNPLHLHK     | 56 | 5542  | 0.96  | 0.18 | 19  |
| 22 C46F11.2a;C46F11.2b | SRFNPMLFAVTK               | 22 | 3426  | 0.99  | 0.08 | 8   |
| 1 C46F11.2a;C46F11.2b  | SRFNPMLFAVTK               | 16 | 1172  | 1.01  | 0.25 | 25  |
| 1 C46F11.2a;C46F11.2b  | RLNGLYESGLK                | 33 | 5516  | 1.03  | 0.18 | 17  |
| 22 C46F11.2a;C46F11.2b | NTQVTEVIK                  | 36 | 4516  | 1.03  | 0.12 | 12  |
| 10 C46F11.2a;C46F11.2b | MLSDELTAADMDEETNPLHLHK     | 43 | 5379  | 1.08  | 0.23 | 21  |
| 10 C46F11.2a;C46F11.2b | SRFNPMLFAVTK               | 45 | 4206  | 1.09  | 0.12 | 11  |
| 1 C46F11.2a;C46F11.2b  | SRFNPMLFAVTK               | 39 | 905   | 1.14  | 0.14 | 12  |
| 10 C46F11.2a;C46F11.2b | ELNLERVGVK                 | 58 | 18559 | 1.15  | 0.20 | 18  |
| 1 C46F11.2a;C46F11.2b  | RLNGLYESGLK                | 31 | 3772  | 1.17  | 0.20 | 17  |
| 10 C46F11.2a;C46F11.2b | SRFNPMLFAVTK               | 20 | 1515  | 1.17  | 0.16 | 13  |
| 1 C46F11.2a;C46F11.2b  | NTLIAVGGKPTIPNIK           | 48 | 12636 | 1.25  | 0.27 | 21  |
| 10 C46F11.2a;C46F11.2b | SRFNPMLFAVTK               | 34 | 4306  | 1.28  | 0.21 | 16  |
| 10 C46F11.2a;C46F11.2b | ELNLERVGVK                 | 37 | 13863 | 1.29  | 0.13 | 10  |
| 22 C46F11.2a;C46F11.2b | SRFNPMLFAVTK               | 15 | 1453  | 1.31  | 0.15 | 11  |
| 22 C46F11.2a;C46F11.2b | RLNGLYESGLK                | 53 | 6966  | 1.39  | 0.21 | 15  |
| 22 C46F11.2a;C46F11.2b | RLNGLYESGLK                | 47 | 8675  | 1.47  | 0.16 | 11  |
| 22 C46F11.2a;C46F11.2b | NTQVTEVIK                  | 22 | 6065  | 1.60  | 0.08 | 5   |
| 22 C46F11.2a;C46F11.2b | NTLIAVGGKPTIPNIK           | 33 | 7728  | 1.67  | 0.52 | 31  |
| 10 C46F11.2a;C46F11.2b | SRFNPMLFAVTK               | 21 | 943   | 1.75  | 0.09 | 5   |
| 10 C46F11.2a;C46F11.2b | RLNGLYESGLK                | 30 | 6450  | 1.95  | 0.22 | 11  |
| 22 C46F11.2a;C46F11.2b | SRFNPMLFAVTK               | 21 | 1399  | 2.13  | 0.20 | 9   |
| 10 C46F11.2a;C46F11.2b | RLNGLYESGLK                | 38 | 7485  | 2.28  | 0.10 | 4   |
| 7 C46F11.2b;C46F11.2a  | GDDGLLTIK                  | 30 | 2698  | 0.23  | 0.17 | 72  |
| 7 C46F11.2b;C46F11.2a  | RLNGLYESGLK                | 37 | 1730  | 0.36  | 0.74 | 205 |
| 7 C46F11.2b;C46F11.2a  | ELNLERVGVK                 | 42 | 11802 | 0.56  | 0.15 | 27  |
| 7 C46F11.2b;C46F11.2a  | MLSDELTAADMDEETNPLHLHK     | 37 | 7472  | 0.70  | 0.06 | 9   |
| 7 C46F11.2b;C46F11.2a  | ELNLERVGVK                 | 41 | 12007 | 0.71  | 0.22 | 31  |
| 7 C46F11.2b;C46F11.2a  | MLSDELTAADMDEETNPLHLHK     | 39 | 8527  | 0.73  | 0.14 | 19  |
| 7 C46F11.2b;C46F11.2a  | ELNLERVGVK                 | 34 | 20948 | 0.77  | 0.12 | 16  |
| 7 C46F11.2b;C46F11.2a  | ELNLERVGVK                 | 29 | 4627  | 0.78  | 0.11 | 14  |
| 7 C46F11.2b;C46F11.2a  | MLSDELTAADMDEETNPLHLHK     | 18 | 4985  | 0.83  | 0.13 | 15  |
| 7 C46F11.2b;C46F11.2a  | SRFNPMLFAVTK               | 14 | 956   | 0.95  | 0.16 | 16  |
| 7 C46F11.2b;C46F11.2a  | RLNGLYESGLK                | 54 | 8222  | 1.19  | 0.24 | 20  |

|                        |                          |    |       |      |      |     |
|------------------------|--------------------------|----|-------|------|------|-----|
| 7 C46F11.2b;C46F11.2a  | RLNGLYESGLK              | 66 | 8899  | 1.22 | 0.20 | 16  |
| 7 C46F11.2b;C46F11.2a  | VLRTFDK                  | 12 | 5376  | 1.36 | 0.10 | 7   |
| 7 C46F11.2b;C46F11.2a  | NTLIAVGGKPTIPNIK         | 16 | 3755  | 2.63 | 0.32 | 12  |
| 7 C46F11.2b;C46F11.2a  | RLNGLYESGLK              | 42 | 3672  | 6.31 | 0.46 | 7   |
| 22 C47B2.3             | AYHEALSVSDITNSCFEPANQMVK | 35 | 4058  | 1.06 | 0.08 | 7   |
| 22 C47B2.4             | MLSGNLRLLELNTGRK         | 14 | 5611  | 0.47 | 0.29 | 61  |
| 10 C47B2.4             | GGLVMGADSRATAGNIIADK     | 25 | 981   | 0.61 | 0.17 | 28  |
| 10 C47B2.4             | RPEPNDLVYK               | 32 | 10371 | 0.84 | 0.08 | 9   |
| 10 C47B2.4             | RPEPNDLVYK               | 44 | 14109 | 0.99 | 0.05 | 5   |
| 10 C47B2.4             | MLSGNLRLLELNTGRK         | 20 | 4660  | 1.08 | 0.19 | 18  |
| 10 C47B2.4             | GGLVMGADSRATAGNIIADK     | 10 | 1928  | 1.39 | 0.15 | 11  |
| 22 C47B2.4             | RPEPNDLVYK               | 51 | 9188  | 1.48 | 0.04 | 3   |
| 22 C47B2.4             | GGLVMGADSRATAGNIIADK     | 12 | 1928  | 1.53 | 0.16 | 10  |
| 22 C47B2.4             | RPEPNDLVYK               | 42 | 8493  | 2.15 | 0.04 | 2   |
| 22 C47B2.6a;C47B2.6b   | FDGIIHLAALK              | 47 | 1494  | 0.66 | 0.18 | 27  |
| 7 C47B2.6a;C47B2.6b    | RVAQLTGK                 | 25 | 7194  | 1.68 | 0.12 | 7   |
| 22 C47B2.6a;C47B2.6b   | RVAQLTGK                 | 36 | 10679 | 1.85 | 0.25 | 13  |
| 22 C47B2.6a;C47B2.6b   | RVAQLTGK                 | 30 | 10923 | 2.12 | 0.22 | 11  |
| 7 C47B2.6a;C47B2.6b    | FDGIIHLAALK              | 73 | 2941  | 2.21 | 0.14 | 6   |
| 7 C47B2.6a;C47B2.6b    | FDGIIHLAALK              | 67 | 2746  | 2.24 | 0.21 | 9   |
| 10 C47D12.6a;C47D12.6b | AEYDAEIAAK               | 32 | 4513  | 0.14 | 0.20 | 135 |
| 10 C47D12.6a;C47D12.6b | AEYDAEIAAK               | 36 | 4906  | 0.25 | 0.40 | 159 |
| 1 C47D12.6a;C47D12.6b  | ESEPIQITLPDGK            | 18 | 1723  | 0.29 | 0.07 | 26  |
| 10 C47D12.6a;C47D12.6b | EDLLEMFK                 | 18 | 422   | 0.32 | 0.25 | 77  |
| 10 C47D12.6a;C47D12.6b | LVDFIRK                  | 21 | 611   | 0.34 | 0.10 | 28  |
| 10 C47D12.6a;C47D12.6b | ADAESLQRLYGISFPDSK       | 29 | 2748  | 0.36 | 0.17 | 49  |
| 22 C47D12.6a;C47D12.6b | ADAESLQRLYGISFPDSK       | 24 | 2576  | 0.37 | 0.19 | 50  |
| 10 C47D12.6a;C47D12.6b | EDLLEMFK                 | 39 | 1497  | 0.39 | 0.25 | 62  |
| 10 C47D12.6a;C47D12.6b | LVDFIRK                  | 40 | 4815  | 0.39 | 0.11 | 27  |
| 10 C47D12.6a;C47D12.6b | ADAESLQRLYGISFPDSK       | 32 | 2592  | 0.40 | 0.13 | 32  |
| 10 C47D12.6a;C47D12.6b | ADAESLQRLYGISFPDSK       | 19 | 3139  | 0.41 | 0.15 | 38  |
| 22 C47D12.6a;C47D12.6b | VNGAVVWDLRPFEGNAK        | 37 | 1559  | 0.45 | 0.14 | 30  |
| 1 C47D12.6a;C47D12.6b  | ESEPIQITLPDGK            | 23 | 2063  | 0.45 | 0.13 | 30  |
| 10 C47D12.6a;C47D12.6b | LVDFIRK                  | 27 | 3940  | 0.47 | 0.13 | 27  |
| 22 C47D12.6a;C47D12.6b | EDLLEMFK                 | 40 | 1224  | 0.51 | 0.24 | 47  |
| 10 C47D12.6a;C47D12.6b | EDLLEMFK                 | 27 | 1184  | 0.52 | 0.16 | 31  |
| 7 C47D12.6a;C47D12.6b  | ESEPIQITLPDGK            | 11 | 1360  | 0.53 | 0.06 | 11  |
| 22 C47D12.6a;C47D12.6b | IDITIQDALK               | 39 | 1387  | 0.53 | 0.14 | 27  |
| 22 C47D12.6a;C47D12.6b | ADAESLQRLYGISFPDSK       | 23 | 3118  | 0.54 | 0.19 | 36  |
| 10 C47D12.6a;C47D12.6b | ADAESLQRLYGISFPDSK       | 34 | 2388  | 0.55 | 0.19 | 36  |
| 10 C47D12.6a;C47D12.6b | AEADLTNALNASGRK          | 23 | 1553  | 0.57 | 0.26 | 46  |
| 22 C47D12.6a;C47D12.6b | IITVHESVRDYANDVK         | 12 | 5750  | 0.59 | 0.10 | 16  |
| 22 C47D12.6a;C47D12.6b | EDLLEMFK                 | 38 | 1982  | 0.60 | 0.11 | 19  |
| 22 C47D12.6a;C47D12.6b | WVLNPGDGAFYGPK           | 68 | 2088  | 0.63 | 0.13 | 21  |
| 22 C47D12.6a;C47D12.6b | IDITIQDALK               | 54 | 1564  | 0.65 | 0.13 | 20  |
| 1 C47D12.6a;C47D12.6b  | EDLLEMFK                 | 14 | 417   | 0.67 | 0.30 | 45  |
| 22 C47D12.6a;C47D12.6b | EDLLEMFK                 | 38 | 1674  | 0.67 | 0.14 | 20  |
| 22 C47D12.6a;C47D12.6b | LVDFIRK                  | 10 | 494   | 0.68 | 0.15 | 22  |
| 10 C47D12.6a;C47D12.6b | TWRTTPFEIAERISK          | 10 | 2117  | 0.68 | 0.26 | 38  |
| 10 C47D12.6a;C47D12.6b | GLAEAAVIAK               | 51 | 1681  | 0.68 | 0.16 | 23  |
| 22 C47D12.6a;C47D12.6b | WVLNPGDGAFYGPK           | 92 | 2628  | 0.69 | 0.11 | 16  |
| 22 C47D12.6a;C47D12.6b | GLAEAAVIAK               | 70 | 3260  | 0.69 | 0.10 | 15  |
| 22 C47D12.6a;C47D12.6b | EDLLEMFK                 | 25 | 1633  | 0.70 | 0.29 | 41  |
| 1 C47D12.6a;C47D12.6b  | ESEPIQITLPDGK            | 18 | 2181  | 0.70 | 0.14 | 20  |
| 10 C47D12.6a;C47D12.6b | AEADLTNALNASGRK          | 35 | 2281  | 0.71 | 0.12 | 16  |
| 22 C47D12.6a;C47D12.6b | LVDFIRK                  | 17 | 983   | 0.72 | 0.23 | 33  |
| 22 C47D12.6a;C47D12.6b | GLAEAAVIAK               | 77 | 4085  | 0.73 | 0.25 | 35  |
| 22 C47D12.6a;C47D12.6b | LVDFIRK                  | 17 | 1022  | 0.73 | 0.13 | 18  |
| 1 C47D12.6a;C47D12.6b  | ESEPIQITLPDGK            | 15 | 2515  | 0.74 | 0.13 | 17  |
| 22 C47D12.6a;C47D12.6b | AEADLTNALNASGRK          | 24 | 3317  | 0.75 | 0.18 | 24  |
| 1 C47D12.6a;C47D12.6b  | AEADLTNALNASGRK          | 20 | 1516  | 0.79 | 0.10 | 13  |
| 10 C47D12.6a;C47D12.6b | AEADLTNALNASGRK          | 66 | 5792  | 0.80 | 0.22 | 27  |
| 1 C47D12.6a;C47D12.6b  | LVDFIRK                  | 21 | 1034  | 0.84 | 0.17 | 20  |
| 10 C47D12.6a;C47D12.6b | AEADLTNALNASGRK          | 56 | 4899  | 0.84 | 0.17 | 20  |
| 7 C47D12.6a;C47D12.6b  | FRRFADEYVADTEK           | 10 | 5091  | 0.86 | 0.04 | 4   |
| 22 C47D12.6a;C47D12.6b | FRRFADEYVADTEK           | 11 | 4831  | 0.88 | 0.18 | 20  |
| 10 C47D12.6a;C47D12.6b | GLAEAAVIAK               | 88 | 5270  | 0.88 | 0.08 | 9   |
| 10 C47D12.6a;C47D12.6b | GLAEAAVIAK               | 62 | 4087  | 0.89 | 0.11 | 12  |
| 10 C47D12.6a;C47D12.6b | IDITIQDALK               | 18 | 784   | 0.91 | 0.19 | 21  |
| 22 C47D12.6a;C47D12.6b | LVDFIRK                  | 14 | 778   | 0.91 | 0.09 | 10  |
| 10 C47D12.6a;C47D12.6b | LVDFIRK                  | 14 | 443   | 0.93 | 0.07 | 7   |
| 10 C47D12.6a;C47D12.6b | VNGAVVWDLRPFEGNAK        | 24 | 2696  | 0.95 | 0.15 | 16  |
| 10 C47D12.6a;C47D12.6b | GLAEAAVIAK               | 56 | 5597  | 0.96 | 0.08 | 8   |
| 22 C47D12.6a;C47D12.6b | EDLLEMFK                 | 11 | 435   | 0.96 | 0.18 | 19  |
| 10 C47D12.6a;C47D12.6b | FRRFADEYVADTEK           | 24 | 1227  | 0.97 | 0.05 | 5   |
| 10 C47D12.6a;C47D12.6b | WVLNPGDGAFYGPK           | 23 | 451   | 1.05 | 0.24 | 23  |
| 10 C47D12.6a;C47D12.6b | GLAEAAVIAK               | 47 | 6311  | 1.08 | 0.11 | 10  |
| 10 C47D12.6a;C47D12.6b | WVLNPGDGAFYGPK           | 48 | 885   | 1.10 | 0.06 | 6   |
| 22 C47D12.6a;C47D12.6b | GLAEAAVIAK               | 19 | 2359  | 1.14 | 0.14 | 12  |
| 22 C47D12.6a;C47D12.6b | IDITIQDALK               | 43 | 1139  | 1.18 | 0.18 | 15  |
| 10 C47D12.6a;C47D12.6b | GLAEAAVIAK               | 42 | 3230  | 1.22 | 0.10 | 8   |
| 10 C47D12.6a;C47D12.6b | GLAEAAVIAK               | 55 | 4958  | 1.25 | 0.09 | 7   |
| 22 C47D12.6a;C47D12.6b | IDITIQDALK               | 22 | 881   | 1.26 | 0.13 | 11  |
| 10 C47D12.6a;C47D12.6b | EDLLEMFK                 | 36 | 992   | 1.28 | 0.14 | 11  |
| 22 C47D12.6a;C47D12.6b | GLAEAAVIAK               | 55 | 2486  | 1.38 | 0.17 | 12  |
| 10 C47D12.6a;C47D12.6b | EDLLEMFK                 | 12 | 659   | 1.53 | 0.16 | 11  |
| 10 C47D12.6a;C47D12.6b | VNGAVVWDLRPFEGNAK        | 16 | 922   | 1.64 | 0.20 | 12  |
| 22 C47D12.6a;C47D12.6b | GLAEAAVIAK               | 47 | 2420  | 1.67 | 0.13 | 8   |
| 7 C47D12.6a;C47D12.6b  | FRRFADEYVADTEK           | 11 | 2260  | 1.71 | 0.29 | 17  |
| 22 C47D12.6a;C47D12.6b | EDLLEMFK                 | 11 | 632   | 1.83 | 0.41 | 22  |
| 22 C47D12.6a;C47D12.6b | GLAEAAVIAK               | 56 | 2943  | 2.09 | 0.09 | 4   |
| 10 C47D12.6a;C47D12.6b | GLAEAAVIAK               | 67 | 4872  | 2.18 | 0.06 | 3   |
| 1 C47D12.6a;C47D12.6b  | LVDFIRK                  | 21 | 1009  | 2.53 | 0.18 | 7   |
| 10 C47D12.6a;C47D12.6b | GLAEAAVIAK               | 75 | 3959  | 2.65 | 0.11 | 4   |
| 22 C47D12.6a;C47D12.6b | LVDFIRK                  | 15 | 1287  | 3.36 | 0.29 | 8   |
| 10 C47D12.6a;C47D12.6b | VRIITEK                  | 12 | 7585  | 4.01 | 0.13 | 3   |
| 10 C47D12.6a;C47D12.6b | LVDFIRK                  | 11 | 623   | 4.18 | 0.41 | 10  |
| 22 C47E12.1            | YLIATSEQPIAAYHRNEWIK     | 31 | 5598  | 0.41 | 0.14 | 33  |
| 1 C47E12.1             | IERTFGDLSTK              | 27 | 1656  | 0.47 | 0.16 | 33  |
| 7 C47E12.1             | IDELSQLTVVQLK            | 40 | 1058  | 0.47 | 0.27 | 56  |
| 7 C47E12.1             | VLDIDMFRTEK              | 30 | 3302  | 0.52 | 0.22 | 41  |

|                                            |                      |    |       |      |      |    |
|--------------------------------------------|----------------------|----|-------|------|------|----|
| 10 C47E12.1                                | LVDEVIELDEK          | 49 | 1655  | 0.53 | 0.18 | 34 |
| 10 C47E12.1                                | IDELSQLTVVQLK        | 54 | 2055  | 0.54 | 0.31 | 58 |
| 10 C47E12.1                                | VLDIDMFRTEK          | 20 | 5146  | 0.56 | 0.08 | 14 |
| 1 C47E12.1                                 | LVDEVIELDEK          | 65 | 2997  | 0.57 | 0.08 | 15 |
| 10 C47E12.1                                | IDELSQLTVVQLK        | 44 | 1962  | 0.57 | 0.20 | 36 |
| 10 C47E12.1                                | VLDIDMFRTEK          | 18 | 2716  | 0.58 | 0.17 | 29 |
| 1 C47E12.1                                 | LVDEVIELDEK          | 76 | 1832  | 0.59 | 0.17 | 28 |
| 10 C47E12.1                                | LVDEVIELDEK          | 68 | 2380  | 0.60 | 0.10 | 16 |
| 10 C47E12.1                                | LVDEVIELDEK          | 77 | 3084  | 0.61 | 0.17 | 28 |
| 1 C47E12.1                                 | VLDIDMFRTEK          | 12 | 4171  | 0.61 | 0.06 | 10 |
| 10 C47E12.1                                | VLDIDMFRTEK          | 18 | 5239  | 0.63 | 0.16 | 26 |
| 1 C47E12.1                                 | LVDEVIELDEK          | 66 | 3299  | 0.63 | 0.13 | 21 |
| 10 C47E12.1                                | IERTFGDLSTK          | 22 | 6136  | 0.63 | 0.08 | 12 |
| 1 C47E12.1                                 | VLDIDMFRTEK          | 11 | 3443  | 0.64 | 0.11 | 17 |
| 1 C47E12.1                                 | IERTFGDLSTK          | 19 | 3573  | 0.64 | 0.20 | 32 |
| 10 C47E12.1                                | VLDIDMFRTEK          | 12 | 3476  | 0.68 | 0.18 | 27 |
| 22 C47E12.1                                | VLDIDMFRTEK          | 13 | 1637  | 0.69 | 0.16 | 23 |
| 7 C47E12.1                                 | LVDEVIELDEK          | 56 | 2357  | 0.69 | 0.07 | 10 |
| 1 C47E12.1                                 | VLDIDMFRTEK          | 17 | 2659  | 0.72 | 0.12 | 17 |
| 10 C47E12.1                                | SVQTAAAVIANENARHEK   | 36 | 31880 | 0.77 | 0.10 | 13 |
| 10 C47E12.1                                | LVDEVIELDEK          | 71 | 1886  | 0.77 | 0.20 | 26 |
| 22 C47E12.1                                | SVQTAAAVIANENARHEK   | 25 | 12653 | 0.78 | 0.24 | 31 |
| 10 C47E12.1                                | IERTFGDLSTK          | 21 | 2605  | 0.78 | 0.10 | 13 |
| 7 C47E12.1                                 | LVDEVIELDEK          | 72 | 1945  | 0.81 | 0.17 | 21 |
| 22 C47E12.1                                | SVQTAAAVIANENARHEK   | 24 | 4595  | 0.82 | 0.41 | 50 |
| 22 C47E12.1                                | LVDEVIELDEK          | 49 | 1460  | 0.83 | 0.06 | 8  |
| 22 C47E12.1                                | SVQTAAAVIANENARHEK   | 16 | 6084  | 0.84 | 0.17 | 20 |
| 10 C47E12.1                                | SVQTAAAVIANENARHEK   | 10 | 19344 | 0.84 | 0.16 | 19 |
| 10 C47E12.1                                | LVDEVIELDEK          | 52 | 1279  | 0.84 | 0.13 | 15 |
| 22 C47E12.1                                | LVDEVIELDEK          | 60 | 2182  | 0.85 | 0.19 | 22 |
| 1 C47E12.1                                 | IDELSQLTVVQLK        | 46 | 860   | 0.85 | 0.19 | 23 |
| 1 C47E12.1                                 | IERTFGDLSTK          | 19 | 1424  | 0.85 | 0.03 | 3  |
| 22 C47E12.1                                | VLDIDMFRTEK          | 17 | 1608  | 0.86 | 0.20 | 24 |
| 7 C47E12.1                                 | VLDIDMFRTEK          | 30 | 3274  | 0.88 | 0.13 | 15 |
| 10 C47E12.1                                | IDELSQLTVVQLK        | 71 | 1594  | 0.90 | 0.17 | 19 |
| 22 C47E12.1                                | LVDEVIELDEK          | 61 | 1187  | 0.90 | 0.15 | 17 |
| 10 C47E12.1                                | LVDEVIELDEK          | 57 | 1952  | 0.92 | 0.17 | 18 |
| 1 C47E12.1                                 | YLIATSEQPIAAYHRNEWIK | 21 | 3246  | 0.93 | 0.10 | 11 |
| 22 C47E12.1                                | SVQTAAAVIANENARHEK   | 19 | 9859  | 0.94 | 0.12 | 13 |
| 1 C47E12.1                                 | LVDEVIELDEK          | 62 | 1373  | 0.95 | 0.19 | 20 |
| 1 C47E12.1                                 | SVQTAAAVIANENARHEK   | 11 | 9425  | 0.95 | 0.26 | 27 |
| 22 C47E12.1                                | SVQTAAAVIANENARHEK   | 23 | 9502  | 0.96 | 0.26 | 28 |
| 7 C47E12.1                                 | GGNPEIIRK            | 14 | 4543  | 0.97 | 0.14 | 14 |
| 22 C47E12.1                                | SVQTAAAVIANENARHEK   | 13 | 3788  | 0.99 | 0.23 | 23 |
| 10 C47E12.1                                | IDELSQLTVVQLK        | 79 | 1920  | 1.01 | 0.12 | 12 |
| 22 C47E12.1                                | SVQTAAAVIANENARHEK   | 26 | 8151  | 1.03 | 0.21 | 20 |
| 10 C47E12.1                                | IERTFGDLSTK          | 28 | 4387  | 1.05 | 0.28 | 26 |
| 7 C47E12.1                                 | SVQTAAAVIANENARHEK   | 15 | 7751  | 1.08 | 0.17 | 16 |
| 22 C47E12.1                                | IERTFGDLSTK          | 27 | 2537  | 1.08 | 0.15 | 14 |
| 1 C47E12.1                                 | IDELSQLTVVQLK        | 65 | 1121  | 1.12 | 0.14 | 13 |
| 1 C47E12.1                                 | LVDEVIELDEK          | 42 | 962   | 1.12 | 0.19 | 17 |
| 10 C47E12.1                                | VLDIDMFRTEK          | 12 | 2120  | 1.14 | 0.11 | 9  |
| 22 C47E12.1                                | SVQTAAAVIANENARHEK   | 11 | 2172  | 1.16 | 0.24 | 21 |
| 1 C47E12.1                                 | LVDEVIELDEK          | 47 | 1047  | 1.16 | 0.12 | 11 |
| 1 C47E12.1                                 | IDELSQLTVVQLK        | 34 | 657   | 1.18 | 0.24 | 20 |
| 10 C47E12.1                                | SVQTAAAVIANENARHEK   | 11 | 16378 | 1.20 | 0.12 | 10 |
| 1 C47E12.1                                 | SVQTAAAVIANENARHEK   | 21 | 8626  | 1.20 | 0.14 | 11 |
| 22 C47E12.1                                | SVQTAAAVIANENARHEK   | 15 | 9313  | 1.21 | 0.18 | 15 |
| 7 C47E12.1                                 | LVDEVIELDEK          | 62 | 1759  | 1.23 | 0.13 | 11 |
| 22 C47E12.1                                | GGNPEIIRK            | 14 | 4400  | 1.24 | 0.12 | 10 |
| 1 C47E12.1                                 | SVQTAAAVIANENARHEK   | 31 | 4643  | 1.25 | 0.41 | 33 |
| 1 C47E12.1                                 | SVQTAAAVIANENARHEK   | 14 | 10346 | 1.29 | 0.25 | 19 |
| 1 C47E12.1                                 | SVQTAAAVIANENARHEK   | 25 | 9233  | 1.38 | 0.23 | 17 |
| 7 C47E12.1                                 | GGNPEIIRK            | 10 | 3243  | 1.41 | 0.18 | 13 |
| 7 C47E12.1                                 | LVDEVIELDEK          | 44 | 1094  | 1.59 | 0.19 | 12 |
| 1 C47E12.1                                 | LVDEVIELDEK          | 33 | 1025  | 1.73 | 0.18 | 10 |
| 22 C47E12.1                                | LRVLVDEK             | 11 | 3793  | 1.81 | 0.08 | 4  |
| 7 C47E12.1                                 | GGNPEIIRK            | 10 | 4408  | 1.82 | 0.07 | 4  |
| 10 C47E12.1                                | SVQTAAAVIANENARHEK   | 24 | 10632 | 1.86 | 0.23 | 12 |
| 1 C47E12.1                                 | IDELSQLTVVQLK        | 32 | 487   | 2.02 | 0.24 | 12 |
| 1 C47E12.1                                 | LVDEVIELDEK          | 72 | 1805  | 2.14 | 0.16 | 8  |
| 22 C47E12.4a;C47E12.4b;C47E12.4c;C47E12.4d | LVAIDVNDENADK        | 51 | 2207  | 0.26 | 0.24 | 92 |
| 22 C47E12.4a;C47E12.4b;C47E12.4c;C47E12.4d | VAGRGAVLQVK          | 35 | 24459 | 0.33 | 0.13 | 39 |
| 22 C47E12.4a;C47E12.4b;C47E12.4c;C47E12.4d | LVAIDVNDENADK        | 27 | 1870  | 0.35 | 0.24 | 70 |
| 7 C47E12.4a;C47E12.4b;C47E12.4c;C47E12.4d  | LVAIDVNDENADK        | 47 | 1907  | 0.36 | 0.20 | 56 |
| 22 C47E12.4a;C47E12.4b;C47E12.4c;C47E12.4d | GDNDPIDVIEVGSK       | 29 | 2144  | 0.39 | 0.14 | 35 |
| 22 C47E12.4a;C47E12.4b;C47E12.4c;C47E12.4d | VIDETNEYWK           | 14 | 1263  | 0.52 | 0.22 | 42 |
| 10 C47E12.4a;C47E12.4b;C47E12.4c;C47E12.4d | LVAIDVNDENADK        | 54 | 4289  | 0.52 | 0.25 | 48 |
| 22 C47E12.4a;C47E12.4b;C47E12.4c;C47E12.4d | LVAIDVNDENADK        | 65 | 3795  | 0.52 | 0.11 | 21 |
| 22 C47E12.4a;C47E12.4b;C47E12.4c;C47E12.4d | LVAIDVNDENADK        | 52 | 3866  | 0.54 | 0.17 | 31 |
| 22 C47E12.4a;C47E12.4b;C47E12.4c;C47E12.4d | GDNDPIDVIEVGSK       | 48 | 2357  | 0.56 | 0.19 | 34 |
| 10 C47E12.4a;C47E12.4b;C47E12.4c;C47E12.4d | VAGRGAVLQVK          | 35 | 20484 | 0.57 | 0.33 | 58 |
| 10 C47E12.4a;C47E12.4b;C47E12.4c;C47E12.4d | GDNDPIDVIEVGSK       | 54 | 3710  | 0.58 | 0.24 | 42 |
| 22 C47E12.4a;C47E12.4b;C47E12.4c;C47E12.4d | GPQGIVSPWHDIPLFANK   | 28 | 2948  | 0.61 | 0.22 | 36 |
| 10 C47E12.4a;C47E12.4b;C47E12.4c;C47E12.4d | GDNDPIDVIEVGSK       | 58 | 3423  | 0.61 | 0.15 | 25 |
| 10 C47E12.4a;C47E12.4b;C47E12.4c;C47E12.4d | VAGRGAVLQVK          | 34 | 13586 | 0.62 | 0.18 | 30 |
| 22 C47E12.4a;C47E12.4b;C47E12.4c;C47E12.4d | VIDETNEYWK           | 29 | 1664  | 0.64 | 0.25 | 38 |
| 10 C47E12.4a;C47E12.4b;C47E12.4c;C47E12.4d | LVAIDVNDENADK        | 59 | 4109  | 0.67 | 0.22 | 33 |
| 22 C47E12.4a;C47E12.4b;C47E12.4c;C47E12.4d | GPQGIVSPWHDIPLFANK   | 62 | 2628  | 0.75 | 0.07 | 9  |
| 22 C47E12.4a;C47E12.4b;C47E12.4c;C47E12.4d | RVYNMIVEIPRWTNAK     | 11 | 2941  | 0.79 | 0.21 | 26 |
| 10 C47E12.4a;C47E12.4b;C47E12.4c;C47E12.4d | VIDETNEYWK           | 41 | 1950  | 0.81 | 0.16 | 20 |
| 10 C47E12.4a;C47E12.4b;C47E12.4c;C47E12.4d | GPQGIVSPWHDIPLFANK   | 30 | 2382  | 0.84 | 0.13 | 16 |
| 22 C47E12.4a;C47E12.4b;C47E12.4c;C47E12.4d | GPQGIVSPWHDIPLFANK   | 81 | 2947  | 0.85 | 0.13 | 15 |
| 22 C47E12.4a;C47E12.4b;C47E12.4c;C47E12.4d | VAGRGAVLQVK          | 19 | 15574 | 0.89 | 0.08 | 10 |
| 10 C47E12.4a;C47E12.4b;C47E12.4c;C47E12.4d | GPQGIVSPWHDIPLFANK   | 60 | 1482  | 0.90 | 0.09 | 11 |
| 22 C47E12.4a;C47E12.4b;C47E12.4c;C47E12.4d | GPQGIVSPWHDIPLFANK   | 23 | 2715  | 0.90 | 0.18 | 21 |
| 10 C47E12.4a;C47E12.4b;C47E12.4c;C47E12.4d | VIDETNEYWK           | 29 | 2155  | 0.93 | 0.14 | 15 |
| 10 C47E12.4a;C47E12.4b;C47E12.4c;C47E12.4d | GPQGIVSPWHDIPLFANK   | 37 | 2693  | 0.93 | 0.15 | 16 |
| 22 C47E12.4a;C47E12.4b;C47E12.4c;C47E12.4d | VAGRGAVLQVK          | 12 | 1644  | 1.01 | 0.31 | 31 |
| 1 C47E12.4a;C47E12.4b;C47E12.4c;C47E12.4d  | VIDETNEYWK           | 11 | 1128  | 1.07 | 0.19 | 18 |
| 10 C47E12.4a;C47E12.4b;C47E12.4c;C47E12.4d | GPQGIVSPWHDIPLFANK   | 46 | 1245  | 1.23 | 0.09 | 8  |



|            |                        |     |       |      |      |     |
|------------|------------------------|-----|-------|------|------|-----|
| 10 C47E8.5 | DVVAASAFVERVK          | 62  | 4485  | 0.14 | 0.32 | 229 |
| 10 C47E8.5 | EGLELPETEECK           | 29  | 3932  | 0.15 | 0.06 | 42  |
| 10 C47E8.5 | IVMHIK                 | 31  | 10469 | 0.20 | 0.22 | 112 |
| 7 C47E8.5  | LSDFLRYSTSAGDEPTSLK    | 32  | 1367  | 0.20 | 0.48 | 233 |
| 10 C47E8.5 | DVVAASAFVERVK          | 72  | 14019 | 0.22 | 0.15 | 69  |
| 7 C47E8.5  | LSDFLRYSTSAGDEPTSLK    | 53  | 8339  | 0.22 | 0.20 | 91  |
| 22 C47E8.5 | EGLELPETEECK           | 16  | 1576  | 0.22 | 0.17 | 76  |
| 10 C47E8.5 | DVVAASAFVERVK          | 73  | 10179 | 0.22 | 0.13 | 59  |
| 10 C47E8.5 | DVVAASAFVERVK          | 61  | 5537  | 0.22 | 0.12 | 55  |
| 10 C47E8.5 | SLSNDWEDHLAVK          | 66  | 4747  | 0.23 | 0.15 | 65  |
| 10 C47E8.5 | IVMHIK                 | 29  | 8406  | 0.23 | 0.17 | 72  |
| 1 C47E8.5  | DVVAASAFVERVK          | 48  | 2219  | 0.24 | 0.20 | 85  |
| 7 C47E8.5  | LSDFLRYSTSAGDEPTSLK    | 42  | 1160  | 0.24 | 0.26 | 106 |
| 1 C47E8.5  | FYEQFGK                | 11  | 511   | 0.25 | 0.61 | 243 |
| 10 C47E8.5 | FYEQFGK                | 21  | 3626  | 0.25 | 0.30 | 118 |
| 22 C47E8.5 | AQALRDSSTMGYMAAK       | 83  | 1533  | 0.25 | 0.23 | 90  |
| 10 C47E8.5 | DVVAASAFVERVK          | 44  | 4580  | 0.26 | 0.19 | 74  |
| 10 C47E8.5 | SLSNDWEDHLAVK          | 70  | 6313  | 0.26 | 0.19 | 72  |
| 1 C47E8.5  | DVVAASAFVERVK          | 53  | 2298  | 0.27 | 0.14 | 51  |
| 10 C47E8.5 | ELFIK                  | 16  | 1164  | 0.28 | 0.31 | 109 |
| 1 C47E8.5  | HSQFIGYPIK             | 39  | 1083  | 0.29 | 0.03 | 9   |
| 7 C47E8.5  | FYEQFGK                | 37  | 5791  | 0.29 | 0.77 | 263 |
| 1 C47E8.5  | DVVAASAFVERVK          | 49  | 1284  | 0.29 | 0.22 | 75  |
| 1 C47E8.5  | DVVAASAFVERVK          | 23  | 1254  | 0.30 | 0.16 | 55  |
| 1 C47E8.5  | DVVAASAFVERVK          | 45  | 2263  | 0.30 | 0.17 | 56  |
| 22 C47E8.5 | TLTIMDTGIGMTK          | 94  | 2895  | 0.30 | 0.16 | 53  |
| 1 C47E8.5  | DVVAASAFVERVK          | 51  | 1623  | 0.30 | 0.16 | 53  |
| 7 C47E8.5  | DVVAASAFVERVK          | 57  | 5558  | 0.30 | 0.30 | 97  |
| 10 C47E8.5 | ELFIK                  | 14  | 1319  | 0.31 | 0.27 | 88  |
| 10 C47E8.5 | GVVDSEDLPNISREMLQQSK   | 29  | 2965  | 0.31 | 0.19 | 60  |
| 22 C47E8.5 | LSDFLRYSTSAGDEPTSLK    | 31  | 1681  | 0.33 | 0.14 | 44  |
| 1 C47E8.5  | DVVAASAFVERVK          | 56  | 3467  | 0.35 | 0.11 | 30  |
| 7 C47E8.5  | EDQIDFLEERK            | 17  | 2976  | 0.35 | 0.10 | 28  |
| 22 C47E8.5 | EDQIDFLEERK            | 25  | 8894  | 0.37 | 0.25 | 69  |
| 22 C47E8.5 | DVVAASAFVERVK          | 70  | 9121  | 0.37 | 0.12 | 34  |
| 22 C47E8.5 | LSDFLRYSTSAGDEPTSLK    | 41  | 2932  | 0.37 | 0.17 | 46  |
| 1 C47E8.5  | ADLVNNLGTIAK           | 25  | 782   | 0.37 | 0.20 | 53  |
| 22 C47E8.5 | IVMHIK                 | 25  | 3804  | 0.37 | 0.27 | 71  |
| 22 C47E8.5 | TLTIMDTGIGMTK          | 85  | 2263  | 0.37 | 0.16 | 42  |
| 22 C47E8.5 | TLTIMDTGIGMTK          | 74  | 2924  | 0.37 | 0.23 | 61  |
| 10 C47E8.5 | LGIHEDSTNRK            | 21  | 63779 | 0.38 | 0.16 | 43  |
| 7 C47E8.5  | EDQIDFLEERK            | 15  | 3828  | 0.38 | 0.12 | 31  |
| 1 C47E8.5  | DVVAASAFVERVK          | 29  | 1611  | 0.38 | 0.13 | 34  |
| 10 C47E8.5 | EDQIDFLEERK            | 18  | 3390  | 0.38 | 0.11 | 28  |
| 22 C47E8.5 | LGIHEDSTNRK            | 13  | 12551 | 0.38 | 0.30 | 79  |
| 1 C47E8.5  | EDQIDFLEERK            | 24  | 3217  | 0.39 | 0.15 | 40  |
| 22 C47E8.5 | DVVAASAFVERVK          | 65  | 5178  | 0.39 | 0.21 | 54  |
| 1 C47E8.5  | FYEQFGK                | 36  | 4372  | 0.39 | 0.18 | 47  |
| 22 C47E8.5 | DVVAASAFVERVK          | 52  | 10060 | 0.39 | 0.08 | 20  |
| 1 C47E8.5  | ADLVNNLGTIAK           | 22  | 794   | 0.39 | 0.33 | 85  |
| 1 C47E8.5  | FYEQFGK                | 19  | 1252  | 0.39 | 0.19 | 49  |
| 1 C47E8.5  | HSQFIGYPIK             | 37  | 1044  | 0.40 | 0.09 | 24  |
| 10 C47E8.5 | TKPIWTRNPDDISNEEYAEFYK | 17  | 5657  | 0.40 | 0.18 | 46  |
| 7 C47E8.5  | DVVAASAFVERVK          | 58  | 5197  | 0.40 | 0.19 | 48  |
| 7 C47E8.5  | LSDFLRYSTSAGDEPTSLK    | 54  | 4777  | 0.40 | 0.27 | 68  |
| 7 C47E8.5  | DVVAASAFVERVK          | 51  | 5068  | 0.40 | 0.11 | 28  |
| 22 C47E8.5 | DVVAASAFVERVK          | 35  | 4071  | 0.40 | 0.15 | 38  |
| 22 C47E8.5 | GVVDSEDLPNISREMLQQSK   | 38  | 2069  | 0.41 | 0.15 | 37  |
| 1 C47E8.5  | DVVAASAFVERVK          | 54  | 2958  | 0.41 | 0.15 | 38  |
| 10 C47E8.5 | FYEQFGK                | 13  | 2419  | 0.41 | 0.28 | 68  |
| 10 C47E8.5 | GVVDSEDLPNISREMLQQSK   | 32  | 2044  | 0.41 | 0.12 | 28  |
| 22 C47E8.5 | TKPIWTRNPDDISNEEYAEFYK | 43  | 2571  | 0.41 | 0.22 | 54  |
| 1 C47E8.5  | EDQIDFLEERK            | 16  | 3787  | 0.42 | 0.15 | 37  |
| 22 C47E8.5 | TLTIMDTGIGMTK          | 92  | 2828  | 0.42 | 0.11 | 26  |
| 22 C47E8.5 | EGLELPETEECK           | 11  | 1629  | 0.43 | 0.20 | 46  |
| 22 C47E8.5 | IVMHIK                 | 25  | 13377 | 0.43 | 0.11 | 26  |
| 1 C47E8.5  | DVVAASAFVERVK          | 70  | 6593  | 0.43 | 0.09 | 22  |
| 10 C47E8.5 | GVVDSEDLPNISREMLQQSK   | 43  | 3160  | 0.43 | 0.16 | 36  |
| 22 C47E8.5 | FYEQFGK                | 45  | 13181 | 0.43 | 0.09 | 20  |
| 10 C47E8.5 | LGIHEDSTNRK            | 26  | 81196 | 0.43 | 0.18 | 41  |
| 1 C47E8.5  | DVVAASAFVERVK          | 43  | 2118  | 0.43 | 0.14 | 32  |
| 7 C47E8.5  | LSDFLRYSTSAGDEPTSLK    | 31  | 2811  | 0.44 | 0.21 | 47  |
| 22 C47E8.5 | FYEQFGK                | 44  | 14767 | 0.44 | 0.09 | 21  |
| 10 C47E8.5 | TLTIMDTGIGMTK          | 46  | 2018  | 0.44 | 0.17 | 37  |
| 7 C47E8.5  | FYEQFGK                | 25  | 3985  | 0.44 | 0.27 | 61  |
| 22 C47E8.5 | FYEQFGK                | 44  | 13915 | 0.45 | 0.09 | 21  |
| 1 C47E8.5  | ENQTQIYYITGESK         | 68  | 3034  | 0.45 | 0.18 | 39  |
| 7 C47E8.5  | EDQIDFLEERK            | 41  | 6102  | 0.45 | 0.09 | 19  |
| 22 C47E8.5 | FYEQFGK                | 28  | 7500  | 0.45 | 0.19 | 42  |
| 22 C47E8.5 | FYEQFGK                | 24  | 4426  | 0.45 | 0.26 | 58  |
| 22 C47E8.5 | LSDFLRYSTSAGDEPTSLK    | 20  | 2657  | 0.45 | 0.17 | 38  |
| 22 C47E8.5 | IVMHIK                 | 30  | 10402 | 0.45 | 0.09 | 19  |
| 10 C47E8.5 | GVVDSEDLPNISREMLQQSK   | 36  | 12589 | 0.46 | 0.19 | 42  |
| 1 C47E8.5  | DVVAASAFVERVK          | 32  | 2062  | 0.46 | 0.16 | 35  |
| 22 C47E8.5 | EYVSRMK                | 13  | 5079  | 0.46 | 0.13 | 28  |
| 7 C47E8.5  | DVVAASAFVERVK          | 42  | 3573  | 0.46 | 0.14 | 30  |
| 22 C47E8.5 | FYEQFGK                | 29  | 6148  | 0.46 | 0.15 | 33  |
| 10 C47E8.5 | FYEQFGK                | 45  | 22661 | 0.46 | 0.11 | 24  |
| 10 C47E8.5 | LSDFLRYSTSAGDEPTSLK    | 59  | 1776  | 0.46 | 0.15 | 32  |
| 22 C47E8.5 | EDQIDFLEERK            | 24  | 5345  | 0.47 | 0.18 | 38  |
| 7 C47E8.5  | LSDFLRYSTSAGDEPTSLK    | 65  | 2950  | 0.47 | 0.08 | 17  |
| 7 C47E8.5  | EDQIDFLEERK            | 37  | 4838  | 0.47 | 0.12 | 26  |
| 10 C47E8.5 | FYEQFGK                | 46  | 5693  | 0.47 | 0.13 | 28  |
| 7 C47E8.5  | LSDFLRYSTSAGDEPTSLK    | 53  | 2775  | 0.48 | 0.24 | 51  |
| 7 C47E8.5  | SLSNDWEDHLAVK          | 63  | 8231  | 0.48 | 0.15 | 31  |
| 10 C47E8.5 | ENQTQIYYITGESK         | 114 | 6912  | 0.48 | 0.11 | 23  |
| 22 C47E8.5 | EYVSRMK                | 27  | 4718  | 0.48 | 0.22 | 46  |
| 10 C47E8.5 | IVMHIK                 | 13  | 2851  | 0.48 | 0.15 | 30  |
| 10 C47E8.5 | FYEQFGK                | 49  | 18698 | 0.48 | 0.17 | 35  |
| 22 C47E8.5 | IVMHIK                 | 20  | 6501  | 0.48 | 0.12 | 24  |
| 22 C47E8.5 | SLSNDWEDHLAVK          | 82  | 4220  | 0.49 | 0.08 | 17  |

|            |                          |     |       |      |      |    |
|------------|--------------------------|-----|-------|------|------|----|
| 22 C47E8.5 | DVVAASAFVERVK            | 51  | 3830  | 0.49 | 0.17 | 35 |
| 10 C47E8.5 | EDQIDFLEERK              | 21  | 6344  | 0.49 | 0.14 | 29 |
| 22 C47E8.5 | FYEQFGK                  | 44  | 18582 | 0.49 | 0.10 | 19 |
| 7 C47E8.5  | LSDFLRYSTSAGDEPTSLK      | 16  | 1176  | 0.49 | 0.13 | 26 |
| 22 C47E8.5 | IVMHIK                   | 22  | 42558 | 0.49 | 0.06 | 13 |
| 22 C47E8.5 | LSDFLRYSTSAGDEPTSLK      | 24  | 1098  | 0.49 | 0.17 | 35 |
| 22 C47E8.5 | SLSNDWEDHLAVK            | 53  | 2799  | 0.49 | 0.13 | 25 |
| 10 C47E8.5 | EDQIDFLEERK              | 20  | 4904  | 0.50 | 0.14 | 28 |
| 1 C47E8.5  | FYEQFGK                  | 46  | 9453  | 0.50 | 0.09 | 17 |
| 7 C47E8.5  | SLSNDWEDHLAVK            | 100 | 7193  | 0.50 | 0.16 | 31 |
| 1 C47E8.5  | LGIHEDSTNRK              | 22  | 6372  | 0.50 | 0.12 | 25 |
| 7 C47E8.5  | FYEQFGK                  | 20  | 3975  | 0.50 | 0.23 | 45 |
| 1 C47E8.5  | FYEQFGK                  | 50  | 9493  | 0.50 | 0.08 | 16 |
| 7 C47E8.5  | SLSNDWEDHLAVK            | 56  | 9427  | 0.50 | 0.14 | 27 |
| 1 C47E8.5  | LGIHEDSTNRK              | 15  | 7179  | 0.51 | 0.24 | 47 |
| 10 C47E8.5 | SLSNDWEDHLAVK            | 87  | 9218  | 0.51 | 0.15 | 31 |
| 7 C47E8.5  | ENQTQIYYITGESK           | 101 | 3756  | 0.51 | 0.17 | 34 |
| 22 C47E8.5 | GVVDSEDLPLNISREMLQQSK    | 34  | 3242  | 0.51 | 0.14 | 27 |
| 22 C47E8.5 | GVVDSEDLPLNISREMLQQSK    | 40  | 3286  | 0.51 | 0.25 | 49 |
| 7 C47E8.5  | ENQTQIYYITGESK           | 76  | 4940  | 0.51 | 0.15 | 30 |
| 7 C47E8.5  | GVVDSEDLPLNISREMLQQSK    | 33  | 4730  | 0.52 | 0.22 | 42 |
| 22 C47E8.5 | IVMHIK                   | 15  | 5086  | 0.52 | 0.12 | 23 |
| 1 C47E8.5  | DVVAASAFVERVK            | 62  | 5543  | 0.52 | 0.10 | 19 |
| 7 C47E8.5  | GVVDSEDLPLNISREMLQQSK    | 24  | 4182  | 0.52 | 0.16 | 31 |
| 10 C47E8.5 | IVMHIK                   | 28  | 5841  | 0.52 | 0.15 | 29 |
| 22 C47E8.5 | IVMHIK                   | 22  | 45915 | 0.52 | 0.04 | 8  |
| 7 C47E8.5  | SLSNDWEDHLAVK            | 59  | 3233  | 0.52 | 0.19 | 36 |
| 22 C47E8.5 | EYVSRMK                  | 25  | 4391  | 0.52 | 0.21 | 39 |
| 10 C47E8.5 | LSDFLRYSTSAGDEPTSLK      | 22  | 1663  | 0.52 | 0.09 | 17 |
| 22 C47E8.5 | GVVDSEDLPLNISREMLQQSK    | 26  | 3618  | 0.52 | 0.15 | 29 |
| 1 C47E8.5  | GVVDSEDLPLNISREMLQQSK    | 24  | 2716  | 0.53 | 0.22 | 41 |
| 22 C47E8.5 | LGIHEDSTNRK              | 21  | 28840 | 0.53 | 0.25 | 47 |
| 7 C47E8.5  | IVMHIK                   | 30  | 12010 | 0.53 | 0.09 | 17 |
| 10 C47E8.5 | ENQTQIYYITGESK           | 97  | 12416 | 0.53 | 0.11 | 21 |
| 1 C47E8.5  | DVVAASAFVERVK            | 50  | 5731  | 0.53 | 0.11 | 22 |
| 22 C47E8.5 | EYVSRMK                  | 19  | 3191  | 0.53 | 0.13 | 24 |
| 10 C47E8.5 | EDQIDFLEERK              | 29  | 4816  | 0.53 | 0.10 | 19 |
| 7 C47E8.5  | DVVAASAFVERVK            | 69  | 9908  | 0.53 | 0.13 | 25 |
| 22 C47E8.5 | GVVDSEDLPLNISREMLQQSK    | 34  | 1935  | 0.53 | 0.15 | 28 |
| 22 C47E8.5 | FYEQFGK                  | 26  | 3575  | 0.54 | 0.12 | 22 |
| 10 C47E8.5 | FYEQFGK                  | 43  | 6065  | 0.54 | 0.14 | 26 |
| 1 C47E8.5  | FYEQFGK                  | 25  | 4253  | 0.54 | 0.16 | 30 |
| 1 C47E8.5  | FYEQFGK                  | 36  | 3319  | 0.54 | 0.18 | 33 |
| 22 C47E8.5 | DVVAASAFVERVK            | 50  | 4515  | 0.54 | 0.12 | 21 |
| 22 C47E8.5 | ENQTQIYYITGESK           | 86  | 7798  | 0.54 | 0.16 | 29 |
| 7 C47E8.5  | DVVAASAFVERVK            | 51  | 3687  | 0.54 | 0.13 | 24 |
| 7 C47E8.5  | IVMHIK                   | 24  | 10850 | 0.54 | 0.14 | 25 |
| 22 C47E8.5 | EDQIDFLEERK              | 32  | 5273  | 0.55 | 0.11 | 20 |
| 22 C47E8.5 | ENQTQIYYITGESK           | 95  | 5300  | 0.55 | 0.11 | 20 |
| 10 C47E8.5 | DVVAASAFVERVK            | 37  | 2889  | 0.55 | 0.16 | 30 |
| 22 C47E8.5 | TLTIMDTGIGMTK            | 22  | 1167  | 0.55 | 0.15 | 27 |
| 22 C47E8.5 | LSDFLRYSTSAGDEPTSLK      | 17  | 5199  | 0.55 | 0.18 | 32 |
| 10 C47E8.5 | GVVDSEDLPLNISREMLQQSK    | 44  | 4391  | 0.56 | 0.20 | 36 |
| 7 C47E8.5  | FYEQFGK                  | 22  | 6436  | 0.56 | 0.21 | 37 |
| 22 C47E8.5 | LGIHEDSTNRK              | 10  | 17100 | 0.56 | 0.33 | 60 |
| 10 C47E8.5 | SLSNDWEDHLAVK            | 82  | 12773 | 0.56 | 0.09 | 16 |
| 10 C47E8.5 | IVMHIK                   | 28  | 6828  | 0.56 | 0.21 | 38 |
| 1 C47E8.5  | SLSNDWEDHLAVK            | 71  | 2483  | 0.56 | 0.18 | 32 |
| 22 C47E8.5 | LSDFLRYSTSAGDEPTSLK      | 19  | 3146  | 0.56 | 0.13 | 23 |
| 1 C47E8.5  | IVMHIK                   | 14  | 4487  | 0.56 | 0.14 | 24 |
| 7 C47E8.5  | ENQTQIYYITGESK           | 83  | 2764  | 0.57 | 0.18 | 32 |
| 1 C47E8.5  | ENQTQIYYITGESK           | 78  | 3904  | 0.57 | 0.12 | 22 |
| 10 C47E8.5 | LGIHEDSTNRK              | 23  | 49933 | 0.57 | 0.14 | 24 |
| 22 C47E8.5 | ENQTQIYYITGESK           | 90  | 4647  | 0.57 | 0.13 | 24 |
| 22 C47E8.5 | FYEQFGK                  | 38  | 3269  | 0.57 | 0.09 | 15 |
| 22 C47E8.5 | YFEDEELNK                | 19  | 3435  | 0.57 | 0.14 | 24 |
| 10 C47E8.5 | EDQIDFLEERK              | 15  | 7479  | 0.57 | 0.12 | 21 |
| 10 C47E8.5 | LGLDIGDDEIEDSAVPSSCTAEAK | 21  | 2064  | 0.58 | 0.17 | 29 |
| 1 C47E8.5  | SLSNDWEDHLAVK            | 61  | 2629  | 0.58 | 0.15 | 25 |
| 22 C47E8.5 | EDQIDFLEERK              | 27  | 5717  | 0.58 | 0.09 | 15 |
| 22 C47E8.5 | FYEQFGK                  | 12  | 2812  | 0.58 | 0.30 | 52 |
| 10 C47E8.5 | EDQIDFLEERK              | 17  | 6670  | 0.58 | 0.08 | 13 |
| 22 C47E8.5 | EYVSRMK                  | 23  | 3915  | 0.58 | 0.30 | 53 |
| 10 C47E8.5 | EDQIDFLEERK              | 14  | 5169  | 0.58 | 0.11 | 20 |
| 1 C47E8.5  | TLTIMDTGIGMTK            | 70  | 2546  | 0.58 | 0.15 | 27 |
| 1 C47E8.5  | IRYQALTEPSELDTGK         | 32  | 2547  | 0.58 | 0.29 | 51 |
| 22 C47E8.5 | LSDFLRYSTSAGDEPTSLK      | 38  | 2210  | 0.58 | 0.08 | 14 |
| 1 C47E8.5  | DVVAASAFVERVK            | 62  | 5555  | 0.58 | 0.10 | 17 |
| 10 C47E8.5 | GVVDSEDLPLNISREMLQQSK    | 41  | 3123  | 0.58 | 0.19 | 32 |
| 10 C47E8.5 | FYEQFGK                  | 11  | 3345  | 0.59 | 0.16 | 26 |
| 22 C47E8.5 | EDQIDFLEERK              | 10  | 5379  | 0.59 | 0.09 | 15 |
| 22 C47E8.5 | DVVAASAFVERVK            | 45  | 7562  | 0.60 | 0.07 | 12 |
| 10 C47E8.5 | FYEQFGK                  | 43  | 12663 | 0.60 | 0.11 | 18 |
| 22 C47E8.5 | TLTIMDTGIGMTK            | 55  | 1773  | 0.61 | 0.24 | 39 |
| 10 C47E8.5 | LSDFLRYSTSAGDEPTSLK      | 16  | 3155  | 0.61 | 0.07 | 11 |
| 10 C47E8.5 | GVVDSEDLPLNISREMLQQSK    | 30  | 6449  | 0.61 | 0.19 | 32 |
| 10 C47E8.5 | GVVDSEDLPLNISREMLQQSK    | 12  | 2382  | 0.61 | 0.10 | 17 |
| 10 C47E8.5 | DVVAASAFVERVK            | 54  | 4929  | 0.61 | 0.12 | 19 |
| 22 C47E8.5 | TLTIMDTGIGMTK            | 26  | 788   | 0.61 | 0.18 | 29 |
| 22 C47E8.5 | LSDFLRYSTSAGDEPTSLK      | 54  | 4065  | 0.61 | 0.13 | 20 |
| 10 C47E8.5 | EYVSRMK                  | 14  | 5302  | 0.62 | 0.13 | 22 |
| 22 C47E8.5 | ENQTQIYYITGESK           | 51  | 2731  | 0.62 | 0.21 | 33 |
| 1 C47E8.5  | DVVAASAFVERVK            | 61  | 5207  | 0.62 | 0.11 | 18 |
| 7 C47E8.5  | IVMHIK                   | 32  | 6364  | 0.62 | 0.04 | 7  |
| 22 C47E8.5 | TLTIMDTGIGMTK            | 93  | 2403  | 0.62 | 0.14 | 23 |
| 1 C47E8.5  | LGIHEDSTNRK              | 16  | 17254 | 0.62 | 0.11 | 18 |
| 7 C47E8.5  | GVVDSEDLPLNISREMLQQSK    | 21  | 5412  | 0.62 | 0.15 | 24 |
| 1 C47E8.5  | IVMHIK                   | 16  | 2467  | 0.62 | 0.10 | 16 |
| 22 C47E8.5 | IVMHIK                   | 21  | 8957  | 0.63 | 0.08 | 12 |
| 7 C47E8.5  | LSDFLRYSTSAGDEPTSLK      | 43  | 5051  | 0.63 | 0.22 | 36 |
| 1 C47E8.5  | SLSNDWEDHLAVK            | 33  | 975   | 0.63 | 0.15 | 24 |

|            |                        |     |       |      |      |     |
|------------|------------------------|-----|-------|------|------|-----|
| 22 C47E8.5 | DVVAASAFVERVK          | 67  | 6934  | 0.64 | 0.11 | 18  |
| 22 C47E8.5 | FYEQFGK                | 21  | 2183  | 0.64 | 0.30 | 47  |
| 10 C47E8.5 | LGIHEDSTNRK            | 21  | 38553 | 0.64 | 0.10 | 16  |
| 22 C47E8.5 | IVMHIK                 | 14  | 16186 | 0.64 | 0.12 | 19  |
| 10 C47E8.5 | DVVAASAFVERVK          | 47  | 4893  | 0.64 | 0.12 | 18  |
| 7 C47E8.5  | ENQTQIYYITGESK         | 105 | 5043  | 0.64 | 0.19 | 29  |
| 10 C47E8.5 | EGLELPETEEEE           | 28  | 2743  | 0.65 | 0.69 | 107 |
| 22 C47E8.5 | LSDFLRYSTSAGDEPTSLK    | 48  | 3305  | 0.65 | 0.11 | 16  |
| 22 C47E8.5 | SLSNDWEDHLAVK          | 85  | 5358  | 0.65 | 0.16 | 24  |
| 7 C47E8.5  | DVVAASAFVERVK          | 54  | 15344 | 0.65 | 0.19 | 29  |
| 22 C47E8.5 | LGIHEDSTNRK            | 23  | 27737 | 0.65 | 0.26 | 39  |
| 22 C47E8.5 | SLSNDWEDHLAVK          | 83  | 3289  | 0.66 | 0.11 | 17  |
| 7 C47E8.5  | TKPIWTRNPDDISNEEYAEFYK | 26  | 2377  | 0.66 | 0.28 | 42  |
| 1 C47E8.5  | IVMHIK                 | 40  | 9019  | 0.66 | 0.09 | 13  |
| 7 C47E8.5  | IRYQALTEPSELDTGK       | 27  | 1464  | 0.66 | 0.05 | 8   |
| 22 C47E8.5 | LSDFLRYSTSAGDEPTSLK    | 26  | 5078  | 0.67 | 0.21 | 32  |
| 22 C47E8.5 | GVVDSEDLPLNISREMLQQSK  | 45  | 6894  | 0.67 | 0.13 | 20  |
| 1 C47E8.5  | ADLVNNLGTIK            | 39  | 1352  | 0.67 | 0.10 | 15  |
| 10 C47E8.5 | EYVSRMK                | 25  | 5730  | 0.67 | 0.12 | 18  |
| 22 C47E8.5 | LGIHEDSTNRK            | 16  | 9287  | 0.67 | 0.22 | 33  |
| 7 C47E8.5  | IVMHIK                 | 31  | 12981 | 0.68 | 0.09 | 14  |
| 22 C47E8.5 | GVVDSEDLPLNISREMLQQSK  | 33  | 5696  | 0.68 | 0.19 | 29  |
| 7 C47E8.5  | TLTIMDTGIGMTK          | 47  | 2206  | 0.68 | 0.16 | 24  |
| 7 C47E8.5  | IRYQALTEPSELDTGK       | 48  | 4731  | 0.68 | 0.12 | 17  |
| 22 C47E8.5 | GVVDSEDLPLNISREMLQQSK  | 41  | 6961  | 0.68 | 0.16 | 24  |
| 22 C47E8.5 | DVVAASAFVERVK          | 50  | 12307 | 0.68 | 0.11 | 16  |
| 22 C47E8.5 | IVMHIK                 | 32  | 46736 | 0.68 | 0.07 | 10  |
| 10 C47E8.5 | GVVDSEDLPLNISREMLQQSK  | 18  | 2455  | 0.68 | 0.16 | 23  |
| 22 C47E8.5 | TLTIMDTGIGMTK          | 30  | 1322  | 0.68 | 0.17 | 26  |
| 22 C47E8.5 | IVMHIK                 | 23  | 45376 | 0.68 | 0.04 | 5   |
| 22 C47E8.5 | LGIHEDSTNRK            | 12  | 15432 | 0.68 | 0.35 | 51  |
| 10 C47E8.5 | GVVDSEDLPLNISREMLQQSK  | 11  | 1871  | 0.68 | 0.18 | 27  |
| 10 C47E8.5 | EYVSRMK                | 17  | 5712  | 0.69 | 0.17 | 25  |
| 10 C47E8.5 | GVVDSEDLPLNISREMLQQSK  | 34  | 8119  | 0.69 | 0.15 | 22  |
| 22 C47E8.5 | IVMHIK                 | 27  | 31745 | 0.69 | 0.09 | 13  |
| 22 C47E8.5 | GVVDSEDLPLNISREMLQQSK  | 56  | 6885  | 0.69 | 0.10 | 15  |
| 22 C47E8.5 | GVVDSEDLPLNISREMLQQSK  | 41  | 5384  | 0.70 | 0.11 | 15  |
| 22 C47E8.5 | SLSNDWEDHLAVK          | 51  | 4147  | 0.70 | 0.13 | 19  |
| 1 C47E8.5  | FYEQFGK                | 22  | 2524  | 0.70 | 0.14 | 20  |
| 10 C47E8.5 | ADLVNNLGTIK            | 23  | 1399  | 0.70 | 0.16 | 22  |
| 22 C47E8.5 | LGIHEDSTNRK            | 29  | 16120 | 0.70 | 0.19 | 28  |
| 10 C47E8.5 | IVMHIK                 | 32  | 59749 | 0.70 | 0.06 | 8   |
| 22 C47E8.5 | DVVAASAFVERVK          | 31  | 2352  | 0.70 | 0.11 | 16  |
| 7 C47E8.5  | GVVDSEDLPLNISREMLQQSK  | 37  | 7848  | 0.70 | 0.14 | 20  |
| 22 C47E8.5 | SLSNDWEDHLAVK          | 79  | 6150  | 0.70 | 0.12 | 17  |
| 1 C47E8.5  | ADLVNNLGTIK            | 57  | 1730  | 0.70 | 0.22 | 31  |
| 10 C47E8.5 | AQALRDSSTMGYMAAK       | 52  | 1643  | 0.70 | 0.23 | 33  |
| 22 C47E8.5 | ELFIK                  | 14  | 551   | 0.70 | 0.22 | 31  |
| 22 C47E8.5 | SLSNDWEDHLAVK          | 50  | 3311  | 0.70 | 0.11 | 16  |
| 7 C47E8.5  | SLSNDWEDHLAVK          | 35  | 2840  | 0.70 | 0.26 | 36  |
| 10 C47E8.5 | TLTIMDTGIGMTK          | 93  | 2738  | 0.71 | 0.13 | 18  |
| 10 C47E8.5 | GVVDSEDLPLNISREMLQQSK  | 24  | 3085  | 0.71 | 0.13 | 19  |
| 1 C47E8.5  | LGIHEDSTNRK            | 16  | 12740 | 0.71 | 0.09 | 12  |
| 22 C47E8.5 | SLSNDWEDHLAVK          | 72  | 4386  | 0.71 | 0.12 | 17  |
| 10 C47E8.5 | ADLVNNLGTIK            | 19  | 1238  | 0.71 | 0.19 | 26  |
| 10 C47E8.5 | GVVDSEDLPLNISREMLQQSK  | 32  | 3027  | 0.71 | 0.18 | 26  |
| 1 C47E8.5  | FYEQFGK                | 24  | 1454  | 0.71 | 0.15 | 22  |
| 1 C47E8.5  | IVMHIK                 | 23  | 7447  | 0.71 | 0.15 | 22  |
| 10 C47E8.5 | EDQIDFLEERK            | 15  | 6292  | 0.72 | 0.12 | 16  |
| 10 C47E8.5 | IVMHIK                 | 32  | 70825 | 0.72 | 0.05 | 7   |
| 10 C47E8.5 | ADLVNNLGTIK            | 20  | 1038  | 0.72 | 0.16 | 22  |
| 22 C47E8.5 | SLSNDWEDHLAVK          | 60  | 4587  | 0.72 | 0.11 | 15  |
| 10 C47E8.5 | FYEQFGK                | 40  | 10680 | 0.72 | 0.09 | 13  |
| 10 C47E8.5 | ENQTQIYYITGESK         | 55  | 2605  | 0.72 | 0.15 | 21  |
| 22 C47E8.5 | GVVDSEDLPLNISREMLQQSK  | 42  | 8494  | 0.73 | 0.15 | 21  |
| 10 C47E8.5 | EYVSRMK                | 11  | 3255  | 0.73 | 0.14 | 19  |
| 7 C47E8.5  | DVVAASAFVERVK          | 53  | 5142  | 0.73 | 0.10 | 14  |
| 10 C47E8.5 | EYVSRMK                | 13  | 3070  | 0.73 | 0.19 | 27  |
| 22 C47E8.5 | ADLVNNLGTIK            | 19  | 1360  | 0.73 | 0.23 | 31  |
| 22 C47E8.5 | LSDFLRYSTSAGDEPTSLK    | 31  | 5527  | 0.73 | 0.15 | 20  |
| 22 C47E8.5 | IVMHIK                 | 29  | 3192  | 0.73 | 0.12 | 16  |
| 22 C47E8.5 | EDQIDFLEERK            | 17  | 4359  | 0.73 | 0.14 | 19  |
| 22 C47E8.5 | SLSNDWEDHLAVK          | 91  | 3482  | 0.73 | 0.15 | 20  |
| 22 C47E8.5 | TKPIWTRNPDDISNEEYAEFYK | 25  | 7081  | 0.74 | 0.32 | 44  |
| 7 C47E8.5  | DVVAASAFVERVK          | 36  | 3777  | 0.74 | 0.14 | 18  |
| 7 C47E8.5  | FYEQFGK                | 19  | 7404  | 0.74 | 0.20 | 26  |
| 7 C47E8.5  | SLSNDWEDHLAVK          | 29  | 1980  | 0.74 | 0.13 | 17  |
| 1 C47E8.5  | FYEQFGK                | 19  | 1046  | 0.75 | 0.64 | 86  |
| 7 C47E8.5  | GVVDSEDLPLNISREMLQQSK  | 42  | 5592  | 0.75 | 0.34 | 45  |
| 7 C47E8.5  | SLSNDWEDHLAVK          | 91  | 9659  | 0.75 | 0.17 | 22  |
| 10 C47E8.5 | ADLVNNLGTIK            | 25  | 2688  | 0.75 | 0.10 | 13  |
| 22 C47E8.5 | EDQIDFLEERK            | 16  | 4609  | 0.76 | 0.10 | 13  |
| 10 C47E8.5 | LGIHEDSTNRK            | 27  | 17247 | 0.76 | 0.11 | 15  |
| 7 C47E8.5  | SLSNDWEDHLAVK          | 56  | 4543  | 0.76 | 0.12 | 16  |
| 1 C47E8.5  | FYEQFGK                | 43  | 6678  | 0.77 | 0.10 | 12  |
| 1 C47E8.5  | FYEQFGK                | 43  | 8147  | 0.77 | 0.07 | 9   |
| 10 C47E8.5 | IVMHIK                 | 10  | 4251  | 0.77 | 0.10 | 13  |
| 22 C47E8.5 | TLTIMDTGIGMTK          | 24  | 1301  | 0.77 | 0.12 | 16  |
| 10 C47E8.5 | LSDFLRYSTSAGDEPTSLK    | 41  | 4340  | 0.78 | 0.13 | 17  |
| 1 C47E8.5  | SLSNDWEDHLAVK          | 48  | 1494  | 0.78 | 0.12 | 16  |
| 10 C47E8.5 | DVVAASAFVERVK          | 54  | 3769  | 0.78 | 0.08 | 10  |
| 10 C47E8.5 | SLSNDWEDHLAVK          | 62  | 5024  | 0.79 | 0.20 | 25  |
| 22 C47E8.5 | TLTIMDTGIGMTK          | 29  | 1320  | 0.79 | 0.28 | 36  |
| 10 C47E8.5 | FYEQFGK                | 42  | 4276  | 0.79 | 0.17 | 21  |
| 1 C47E8.5  | FYEQFGK                | 38  | 7373  | 0.79 | 0.10 | 13  |
| 22 C47E8.5 | SLSNDWEDHLAVK          | 60  | 4279  | 0.79 | 0.10 | 13  |
| 10 C47E8.5 | DVVAASAFVERVK          | 48  | 4302  | 0.80 | 0.09 | 12  |
| 10 C47E8.5 | IVMHIK                 | 12  | 3202  | 0.80 | 0.20 | 25  |
| 22 C47E8.5 | SLSNDWEDHLAVK          | 81  | 4048  | 0.80 | 0.14 | 17  |
| 22 C47E8.5 | DVVAASAFVERVK          | 44  | 3759  | 0.80 | 0.12 | 15  |
| 10 C47E8.5 | SLSNDWEDHLAVK          | 42  | 2350  | 0.80 | 0.10 | 13  |

|            |                        |    |       |      |      |    |
|------------|------------------------|----|-------|------|------|----|
| 10 C47E8.5 | GVVDSEDLPLNISREMLQQSK  | 28 | 7537  | 0.80 | 0.17 | 21 |
| 22 C47E8.5 | DVVAASAFVERVK          | 38 | 1924  | 0.81 | 0.11 | 14 |
| 22 C47E8.5 | TLRDRVEVDK             | 15 | 2340  | 0.81 | 0.23 | 29 |
| 10 C47E8.5 | IRYQALTEPSELDTGK       | 79 | 8301  | 0.81 | 0.14 | 18 |
| 10 C47E8.5 | GVVDSEDLPLNISREMLQQSK  | 67 | 7842  | 0.81 | 0.19 | 24 |
| 22 C47E8.5 | DVVAASAFVERVK          | 47 | 4236  | 0.81 | 0.12 | 15 |
| 1 C47E8.5  | HLEINPDHAIMK           | 19 | 1537  | 0.81 | 0.28 | 34 |
| 22 C47E8.5 | IVMHIK                 | 23 | 3039  | 0.81 | 0.11 | 14 |
| 10 C47E8.5 | AQALRDSSTMGYMAAK       | 21 | 2152  | 0.81 | 0.15 | 19 |
| 10 C47E8.5 | DVVAASAFVERVK          | 67 | 6703  | 0.82 | 0.09 | 11 |
| 7 C47E8.5  | FYEQFGK                | 32 | 2091  | 0.82 | 0.15 | 18 |
| 22 C47E8.5 | DVVAASAFVERVK          | 67 | 4662  | 0.82 | 0.10 | 12 |
| 1 C47E8.5  | HSQFIGYPIK             | 33 | 1267  | 0.82 | 0.17 | 21 |
| 7 C47E8.5  | ADLVNNLGTIAK           | 72 | 5000  | 0.82 | 0.16 | 20 |
| 10 C47E8.5 | GVVDSEDLPLNISREMLQQSK  | 19 | 1701  | 0.82 | 0.21 | 25 |
| 22 C47E8.5 | GVVDSEDLPLNISREMLQQSK  | 47 | 7018  | 0.83 | 0.15 | 18 |
| 1 C47E8.5  | ADLVNNLGTIAK           | 40 | 988   | 0.83 | 0.15 | 18 |
| 1 C47E8.5  | TLTIMDTGIGMTK          | 60 | 2025  | 0.83 | 0.25 | 30 |
| 22 C47E8.5 | DVVAASAFVERVK          | 55 | 9364  | 0.83 | 0.08 | 10 |
| 10 C47E8.5 | DVVAASAFVERVK          | 46 | 4790  | 0.83 | 0.12 | 15 |
| 10 C47E8.5 | TLTIMDTGIGMTK          | 81 | 2727  | 0.84 | 0.15 | 18 |
| 7 C47E8.5  | SLSNDWEDHLAVK          | 58 | 6294  | 0.84 | 0.19 | 23 |
| 10 C47E8.5 | IVMHIK                 | 28 | 52403 | 0.84 | 0.05 | 6  |
| 22 C47E8.5 | IRYQALTEPSELDTGK       | 80 | 5666  | 0.84 | 0.14 | 17 |
| 7 C47E8.5  | SLSNDWEDHLAVK          | 78 | 5601  | 0.84 | 0.11 | 13 |
| 1 C47E8.5  | IVMHIK                 | 11 | 2129  | 0.84 | 0.16 | 19 |
| 22 C47E8.5 | SLSNDWEDHLAVK          | 63 | 6785  | 0.84 | 0.12 | 14 |
| 22 C47E8.5 | AQALRDSSTMGYMAAK       | 48 | 839   | 0.86 | 0.12 | 14 |
| 7 C47E8.5  | ADLVNNLGTIAK           | 25 | 1613  | 0.86 | 0.17 | 20 |
| 22 C47E8.5 | TLTIMDTGIGMTK          | 60 | 2139  | 0.86 | 0.16 | 19 |
| 10 C47E8.5 | IVMHIK                 | 14 | 3363  | 0.86 | 0.12 | 13 |
| 22 C47E8.5 | SLSNDWEDHLAVK          | 28 | 2005  | 0.87 | 0.14 | 16 |
| 10 C47E8.5 | LGIHEDSTNRK            | 12 | 19964 | 0.87 | 0.11 | 13 |
| 7 C47E8.5  | SLSNDWEDHLAVK          | 71 | 7641  | 0.87 | 0.19 | 22 |
| 10 C47E8.5 | DVVAASAFVERVK          | 53 | 4865  | 0.87 | 0.13 | 15 |
| 10 C47E8.5 | IVMHIK                 | 27 | 14893 | 0.87 | 0.13 | 14 |
| 10 C47E8.5 | ENQTQIYYITGESK         | 64 | 3716  | 0.87 | 0.10 | 11 |
| 22 C47E8.5 | SLSNDWEDHLAVK          | 65 | 4409  | 0.88 | 0.14 | 16 |
| 10 C47E8.5 | LSDFLRYSTSAGDEPTSLK    | 34 | 3221  | 0.88 | 0.18 | 21 |
| 7 C47E8.5  | GVVDSEDLPLNISREMLQQSK  | 20 | 4487  | 0.88 | 0.27 | 30 |
| 1 C47E8.5  | ADLVNNLGTIAK           | 10 | 719   | 0.88 | 0.20 | 23 |
| 22 C47E8.5 | LSDFLRYSTSAGDEPTSLK    | 22 | 3051  | 0.88 | 0.17 | 19 |
| 1 C47E8.5  | ADLVNNLGTIAK           | 36 | 956   | 0.88 | 0.14 | 16 |
| 22 C47E8.5 | LGIHEDSTNRK            | 10 | 11942 | 0.88 | 0.22 | 25 |
| 22 C47E8.5 | GVVDSEDLPLNISREMLQQSK  | 41 | 6595  | 0.89 | 0.18 | 21 |
| 22 C47E8.5 | GVVDSEDLPLNISREMLQQSK  | 32 | 8130  | 0.89 | 0.18 | 20 |
| 22 C47E8.5 | FYEQFGK                | 19 | 3030  | 0.89 | 0.20 | 22 |
| 22 C47E8.5 | GVVDSEDLPLNISREMLQQSK  | 25 | 3678  | 0.89 | 0.11 | 12 |
| 22 C47E8.5 | SLSNDWEDHLAVK          | 54 | 3785  | 0.89 | 0.08 | 9  |
| 10 C47E8.5 | IVMHIK                 | 35 | 15305 | 0.89 | 0.10 | 12 |
| 10 C47E8.5 | IVMHIK                 | 30 | 52412 | 0.89 | 0.06 | 7  |
| 22 C47E8.5 | SLSNDWEDHLAVK          | 69 | 4885  | 0.90 | 0.13 | 15 |
| 10 C47E8.5 | IRYQALTEPSELDTGK       | 60 | 9690  | 0.90 | 0.10 | 11 |
| 10 C47E8.5 | CMELIDEVAEDK           | 70 | 2553  | 0.90 | 0.12 | 13 |
| 10 C47E8.5 | GVVDSEDLPLNISREMLQQSK  | 31 | 3166  | 0.91 | 0.13 | 15 |
| 7 C47E8.5  | LGIHEDSTNRK            | 12 | 9234  | 0.91 | 0.27 | 29 |
| 10 C47E8.5 | LSDFLRYSTSAGDEPTSLK    | 26 | 1977  | 0.91 | 0.15 | 16 |
| 22 C47E8.5 | DVVAASAFVERVK          | 59 | 4907  | 0.91 | 0.09 | 10 |
| 7 C47E8.5  | SLSNDWEDHLAVK          | 37 | 3496  | 0.91 | 0.13 | 14 |
| 7 C47E8.5  | HSQFIGYPIK             | 25 | 8915  | 0.91 | 0.17 | 18 |
| 1 C47E8.5  | DVVAASAFVERVK          | 49 | 3663  | 0.92 | 0.11 | 12 |
| 22 C47E8.5 | SLSNDWEDHLAVK          | 69 | 5291  | 0.92 | 0.17 | 19 |
| 22 C47E8.5 | LGIHEDSTNRK            | 14 | 22082 | 0.92 | 0.06 | 7  |
| 10 C47E8.5 | LSDFLRYSTSAGDEPTSLK    | 19 | 2927  | 0.92 | 0.19 | 21 |
| 10 C47E8.5 | TLTIMDTGIGMTK          | 53 | 1738  | 0.92 | 0.11 | 12 |
| 1 C47E8.5  | TLTIMDTGIGMTK          | 79 | 1636  | 0.93 | 0.16 | 18 |
| 10 C47E8.5 | DVVAASAFVERVK          | 42 | 9215  | 0.93 | 0.05 | 5  |
| 10 C47E8.5 | ENQTQIYYITGESK         | 91 | 4813  | 0.93 | 0.09 | 10 |
| 10 C47E8.5 | SLSNDWEDHLAVK          | 60 | 3131  | 0.93 | 0.13 | 14 |
| 10 C47E8.5 | DVVAASAFVERVK          | 64 | 3923  | 0.93 | 0.12 | 13 |
| 22 C47E8.5 | TKPIWTRNPDDISNEEYAEFYK | 28 | 2979  | 0.94 | 0.18 | 19 |
| 10 C47E8.5 | LVSVTK                 | 26 | 585   | 0.94 | 0.05 | 6  |
| 10 C47E8.5 | SLSNDWEDHLAVK          | 66 | 5116  | 0.94 | 0.17 | 18 |
| 22 C47E8.5 | LGIHEDSTNRK            | 17 | 12755 | 0.94 | 0.17 | 18 |
| 10 C47E8.5 | TLRDRVEVDK             | 14 | 3447  | 0.94 | 0.11 | 12 |
| 10 C47E8.5 | GVVDSEDLPLNISREMLQQSK  | 16 | 3537  | 0.94 | 0.20 | 21 |
| 7 C47E8.5  | FYEQFGK                | 22 | 6504  | 0.94 | 0.18 | 19 |
| 10 C47E8.5 | IVMHIK                 | 18 | 31707 | 0.95 | 0.04 | 4  |
| 10 C47E8.5 | IVMHIK                 | 29 | 3964  | 0.95 | 0.11 | 12 |
| 22 C47E8.5 | HSQFIGYPIK             | 24 | 16598 | 0.95 | 0.12 | 12 |
| 7 C47E8.5  | HSQFIGYPIK             | 28 | 2084  | 0.96 | 0.13 | 13 |
| 10 C47E8.5 | SLSNDWEDHLAVK          | 51 | 4231  | 0.96 | 0.12 | 12 |
| 1 C47E8.5  | SLSNDWEDHLAVK          | 56 | 1187  | 0.96 | 0.17 | 17 |
| 7 C47E8.5  | FYEQFGK                | 33 | 5165  | 0.97 | 0.16 | 16 |
| 22 C47E8.5 | IRYQALTEPSELDTGK       | 11 | 2795  | 0.97 | 0.15 | 16 |
| 10 C47E8.5 | CMELIDEVAEDK           | 59 | 2368  | 0.97 | 0.11 | 11 |
| 1 C47E8.5  | FYEQFGK                | 37 | 6300  | 0.98 | 0.11 | 12 |
| 10 C47E8.5 | IVMHIK                 | 31 | 9941  | 0.98 | 0.04 | 4  |
| 22 C47E8.5 | LSDFLRYSTSAGDEPTSLK    | 15 | 4315  | 0.98 | 0.08 | 8  |
| 10 C47E8.5 | AQALRDSSTMGYMAAK       | 11 | 6715  | 0.98 | 0.15 | 15 |
| 10 C47E8.5 | AQALRDSSTMGYMAAK       | 72 | 1820  | 0.99 | 0.10 | 11 |
| 7 C47E8.5  | IRYQALTEPSELDTGK       | 23 | 13063 | 1.00 | 0.21 | 21 |
| 7 C47E8.5  | EYVSRMK                | 19 | 2168  | 1.00 | 0.07 | 7  |
| 1 C47E8.5  | HSQFIGYPIK             | 14 | 2672  | 1.01 | 0.15 | 15 |
| 7 C47E8.5  | ADLVNNLGTIAK           | 30 | 2416  | 1.01 | 0.14 | 14 |
| 22 C47E8.5 | GVVDSEDLPLNISREMLQQSK  | 36 | 8277  | 1.01 | 0.10 | 10 |
| 22 C47E8.5 | LSDFLRYSTSAGDEPTSLK    | 25 | 2169  | 1.01 | 0.13 | 13 |
| 10 C47E8.5 | FYEQFGK                | 27 | 4466  | 1.01 | 0.12 | 12 |
| 7 C47E8.5  | IRYQALTEPSELDTGK       | 49 | 5024  | 1.02 | 0.12 | 12 |
| 7 C47E8.5  | IRYQALTEPSELDTGK       | 27 | 8927  | 1.02 | 0.17 | 17 |
| 7 C47E8.5  | EYVSRMK                | 14 | 2413  | 1.02 | 0.18 | 17 |

|            |                      |    |       |      |      |    |
|------------|----------------------|----|-------|------|------|----|
| 1 C47E8.5  | ADLVNNLGTIAK         | 41 | 993   | 1.02 | 0.21 | 20 |
| 10 C47E8.5 | GVVDESDLPNISREMLQQSK | 36 | 5310  | 1.03 | 0.15 | 14 |
| 10 C47E8.5 | LGIHEDSTNRK          | 11 | 18795 | 1.03 | 0.17 | 16 |
| 22 C47E8.5 | IRYQALTEPSELDTGK     | 53 | 5431  | 1.03 | 0.16 | 15 |
| 1 C47E8.5  | IRYQALTEPSELDTGK     | 29 | 2674  | 1.03 | 0.25 | 25 |
| 10 C47E8.5 | LSDFLRYSTSAGDEPTSLK  | 32 | 2426  | 1.03 | 0.11 | 11 |
| 1 C47E8.5  | HSQFIGYPIK           | 56 | 14437 | 1.03 | 0.20 | 19 |
| 7 C47E8.5  | DVVAASAFVERVK        | 48 | 2246  | 1.03 | 0.14 | 14 |
| 22 C47E8.5 | TLTIMDTGIGMTK        | 10 | 3928  | 1.03 | 0.65 | 63 |
| 1 C47E8.5  | ADLVNNLGTIAK         | 41 | 893   | 1.04 | 0.19 | 19 |
| 7 C47E8.5  | IRYQALTEPSELDTGK     | 60 | 5081  | 1.04 | 0.17 | 16 |
| 10 C47E8.5 | DVVAASAFVERVK        | 44 | 6687  | 1.05 | 0.13 | 13 |
| 1 C47E8.5  | SLSNDWEDHLAVK        | 97 | 6124  | 1.05 | 0.12 | 12 |
| 7 C47E8.5  | IRYQALTEPSELDTGK     | 56 | 3318  | 1.06 | 0.14 | 13 |
| 22 C47E8.5 | HLEINPDHAIMK         | 10 | 2989  | 1.06 | 0.31 | 29 |
| 1 C47E8.5  | SLSNDWEDHLAVK        | 19 | 821   | 1.06 | 0.22 | 21 |
| 22 C47E8.5 | HSQFIGYPIK           | 28 | 5721  | 1.07 | 0.10 | 10 |
| 10 C47E8.5 | IVMHIK               | 28 | 25863 | 1.07 | 0.07 | 6  |
| 7 C47E8.5  | DVVAASAFVERVK        | 57 | 2303  | 1.07 | 0.15 | 14 |
| 1 C47E8.5  | SLSNDWEDHLAVK        | 58 | 6954  | 1.08 | 0.17 | 16 |
| 22 C47E8.5 | IVMHIK               | 20 | 3565  | 1.08 | 0.18 | 17 |
| 10 C47E8.5 | SLSNDWEDHLAVK        | 60 | 2835  | 1.08 | 0.12 | 11 |
| 1 C47E8.5  | TLTIMDTGIGMTK        | 46 | 2260  | 1.08 | 0.18 | 17 |
| 10 C47E8.5 | GVVDESDLPNISREMLQQSK | 59 | 7496  | 1.08 | 0.14 | 13 |
| 22 C47E8.5 | LSDFLRYSTSAGDEPTSLK  | 15 | 1528  | 1.09 | 0.25 | 23 |
| 7 C47E8.5  | TLTIMDTGIGMTK        | 36 | 1719  | 1.09 | 0.18 | 16 |
| 10 C47E8.5 | IVMHIK               | 15 | 2762  | 1.10 | 0.19 | 17 |
| 22 C47E8.5 | IRYQALTEPSELDTGK     | 61 | 4670  | 1.11 | 0.13 | 12 |
| 22 C47E8.5 | ADLVNNLGTIAK         | 36 | 1220  | 1.11 | 0.19 | 17 |
| 10 C47E8.5 | SLSNDWEDHLAVK        | 59 | 5198  | 1.11 | 0.11 | 10 |
| 1 C47E8.5  | IRYQALTEPSELDTGK     | 38 | 844   | 1.12 | 0.18 | 16 |
| 1 C47E8.5  | SLSNDWEDHLAVK        | 49 | 3110  | 1.12 | 0.07 | 6  |
| 7 C47E8.5  | FYEQFGK              | 16 | 6625  | 1.12 | 0.05 | 4  |
| 10 C47E8.5 | FYEQFGK              | 25 | 3533  | 1.12 | 0.14 | 12 |
| 22 C47E8.5 | HSQFIGYPIK           | 52 | 14422 | 1.12 | 0.06 | 6  |
| 1 C47E8.5  | DVVAASAFVERVK        | 54 | 2590  | 1.12 | 0.07 | 6  |
| 1 C47E8.5  | IRYQALTEPSELDTGK     | 70 | 2467  | 1.12 | 0.29 | 26 |
| 1 C47E8.5  | GVVDESDLPNISREMLQQSK | 57 | 6153  | 1.12 | 0.19 | 17 |
| 1 C47E8.5  | IRYQALTEPSELDTGK     | 44 | 2054  | 1.12 | 0.26 | 23 |
| 22 C47E8.5 | HSQFIGYPIK           | 39 | 4287  | 1.13 | 0.13 | 11 |
| 10 C47E8.5 | SLSNDWEDHLAVK        | 72 | 4595  | 1.13 | 0.12 | 11 |
| 1 C47E8.5  | SLSNDWEDHLAVK        | 21 | 868   | 1.13 | 0.16 | 14 |
| 10 C47E8.5 | HSQFIGYPIK           | 26 | 1212  | 1.13 | 0.17 | 15 |
| 1 C47E8.5  | TLTIMDTGIGMTK        | 68 | 1424  | 1.13 | 0.27 | 24 |
| 7 C47E8.5  | IRYQALTEPSELDTGK     | 49 | 3620  | 1.13 | 0.11 | 9  |
| 7 C47E8.5  | SLSNDWEDHLAVK        | 62 | 2817  | 1.13 | 0.09 | 8  |
| 1 C47E8.5  | HSQFIGYPIK           | 10 | 1379  | 1.14 | 0.12 | 11 |
| 1 C47E8.5  | IRYQALTEPSELDTGK     | 54 | 3604  | 1.14 | 0.24 | 21 |
| 1 C47E8.5  | DVVAASAFVERVK        | 47 | 2614  | 1.14 | 0.15 | 13 |
| 10 C47E8.5 | TLTIMDTGIGMTK        | 71 | 2112  | 1.15 | 0.15 | 13 |
| 7 C47E8.5  | SLSNDWEDHLAVK        | 62 | 2613  | 1.15 | 0.12 | 10 |
| 1 C47E8.5  | HSQFIGYPIK           | 46 | 10795 | 1.16 | 0.05 | 5  |
| 22 C47E8.5 | FYEQFGK              | 32 | 3939  | 1.16 | 0.08 | 7  |
| 22 C47E8.5 | ADLVNNLGTIAK         | 19 | 1291  | 1.16 | 0.12 | 10 |
| 10 C47E8.5 | IRYQALTEPSELDTGK     | 12 | 1186  | 1.16 | 0.21 | 18 |
| 10 C47E8.5 | AQALRDSSTMGYMAAK     | 19 | 5476  | 1.16 | 0.21 | 18 |
| 10 C47E8.5 | HSQFIGYPIK           | 30 | 21022 | 1.16 | 0.11 | 9  |
| 7 C47E8.5  | DVVAASAFVERVK        | 49 | 2178  | 1.18 | 0.21 | 17 |
| 10 C47E8.5 | GVVDESDLPNISREMLQQSK | 20 | 7520  | 1.18 | 0.11 | 10 |
| 7 C47E8.5  | HSQFIGYPIK           | 62 | 25858 | 1.18 | 0.07 | 6  |
| 1 C47E8.5  | HLEINPDHAIMK         | 22 | 10643 | 1.19 | 0.32 | 27 |
| 22 C47E8.5 | HSQFIGYPIK           | 60 | 14504 | 1.19 | 0.08 | 7  |
| 10 C47E8.5 | HSQFIGYPIK           | 32 | 3300  | 1.20 | 0.09 | 7  |
| 10 C47E8.5 | SLSNDWEDHLAVK        | 63 | 4550  | 1.21 | 0.06 | 5  |
| 1 C47E8.5  | HSQFIGYPIK           | 19 | 1126  | 1.21 | 0.17 | 14 |
| 1 C47E8.5  | GVVDESDLPNISREMLQQSK | 53 | 4345  | 1.21 | 0.31 | 26 |
| 1 C47E8.5  | SLSNDWEDHLAVK        | 35 | 3562  | 1.21 | 0.10 | 8  |
| 1 C47E8.5  | GVVDESDLPNISREMLQQSK | 51 | 4369  | 1.21 | 0.14 | 11 |
| 7 C47E8.5  | HSQFIGYPIK           | 61 | 35344 | 1.22 | 0.09 | 7  |
| 22 C47E8.5 | TLTIMDTGIGMTK        | 79 | 3783  | 1.23 | 0.11 | 9  |
| 1 C47E8.5  | GVVDESDLPNISREMLQQSK | 39 | 5107  | 1.23 | 0.12 | 10 |
| 10 C47E8.5 | IVMHIK               | 26 | 11201 | 1.23 | 0.11 | 9  |
| 7 C47E8.5  | TLTIMDTGIGMTK        | 55 | 2390  | 1.23 | 0.16 | 13 |
| 22 C47E8.5 | FYEQFGK              | 14 | 3364  | 1.23 | 0.15 | 12 |
| 22 C47E8.5 | TLTIMDTGIGMTK        | 40 | 1379  | 1.24 | 0.13 | 11 |
| 7 C47E8.5  | FYEQFGK              | 15 | 3753  | 1.24 | 0.10 | 8  |
| 1 C47E8.5  | TLTIMDTGIGMTK        | 67 | 1588  | 1.24 | 0.17 | 14 |
| 22 C47E8.5 | HSQFIGYPIK           | 21 | 1091  | 1.25 | 0.16 | 13 |
| 7 C47E8.5  | FYEQFGK              | 33 | 5626  | 1.25 | 0.13 | 11 |
| 22 C47E8.5 | FYEQFGK              | 11 | 2087  | 1.26 | 0.15 | 12 |
| 22 C47E8.5 | TLTIMDTGIGMTK        | 45 | 2089  | 1.26 | 0.19 | 15 |
| 22 C47E8.5 | HSQFIGYPIK           | 25 | 6297  | 1.26 | 0.10 | 8  |
| 1 C47E8.5  | IRYQALTEPSELDTGK     | 45 | 2630  | 1.27 | 0.19 | 15 |
| 7 C47E8.5  | FYEQFGK              | 18 | 4558  | 1.27 | 0.17 | 13 |
| 7 C47E8.5  | FYEQFGK              | 15 | 2530  | 1.28 | 0.17 | 13 |
| 10 C47E8.5 | SLSNDWEDHLAVK        | 51 | 2693  | 1.28 | 0.10 | 8  |
| 10 C47E8.5 | AQALRDSSTMGYMAAK     | 19 | 817   | 1.29 | 0.10 | 8  |
| 7 C47E8.5  | HSQFIGYPIK           | 40 | 5160  | 1.29 | 0.13 | 10 |
| 7 C47E8.5  | SLSNDWEDHLAVK        | 59 | 2168  | 1.29 | 0.10 | 8  |
| 22 C47E8.5 | LSDFLRYSTSAGDEPTSLK  | 18 | 3323  | 1.30 | 0.18 | 14 |
| 7 C47E8.5  | HSQFIGYPIK           | 60 | 7719  | 1.30 | 0.11 | 9  |
| 1 C47E8.5  | GVVDESDLPNISREMLQQSK | 47 | 3252  | 1.31 | 0.27 | 21 |
| 22 C47E8.5 | IRYQALTEPSELDTGK     | 21 | 7460  | 1.32 | 0.13 | 10 |
| 22 C47E8.5 | IVMHIK               | 15 | 3529  | 1.32 | 0.13 | 10 |
| 7 C47E8.5  | FYEQFGK              | 34 | 2634  | 1.32 | 0.18 | 14 |
| 1 C47E8.5  | HLEINPDHAIMK         | 35 | 12195 | 1.32 | 0.13 | 10 |
| 10 C47E8.5 | SLSNDWEDHLAVK        | 41 | 6121  | 1.32 | 0.14 | 10 |
| 22 C47E8.5 | HSQFIGYPIK           | 13 | 1724  | 1.33 | 0.21 | 16 |
| 1 C47E8.5  | HSQFIGYPIK           | 18 | 2754  | 1.33 | 0.20 | 15 |
| 22 C47E8.5 | IRYQALTEPSELDTGK     | 76 | 6514  | 1.33 | 0.13 | 10 |
| 7 C47E8.5  | HSQFIGYPIK           | 37 | 2373  | 1.33 | 0.11 | 8  |

|            |                     |     |        |      |      |    |
|------------|---------------------|-----|--------|------|------|----|
| 7 C47E8.5  | HSQFIGYPIK          | 30  | 2011   | 1.33 | 0.12 | 9  |
| 10 C47E8.5 | TLTIMDTGIGMTK       | 15  | 1428   | 1.34 | 0.18 | 14 |
| 22 C47E8.5 | TLTIMDTGIGMTK       | 33  | 2445   | 1.34 | 0.07 | 6  |
| 10 C47E8.5 | SLSNDWEDHLAVK       | 47  | 3637   | 1.34 | 0.08 | 6  |
| 10 C47E8.5 | TLTIMDTGIGMTK       | 43  | 1741   | 1.35 | 0.25 | 19 |
| 10 C47E8.5 | HSQFIGYPIK          | 64  | 108303 | 1.36 | 0.08 | 6  |
| 10 C47E8.5 | LSDFLRYSTSAGDEPTSLK | 21  | 1324   | 1.36 | 0.22 | 16 |
| 22 C47E8.5 | IVMHIK              | 17  | 4396   | 1.37 | 0.08 | 6  |
| 10 C47E8.5 | SLSNDWEDHLAVK       | 64  | 4744   | 1.37 | 0.11 | 8  |
| 7 C47E8.5  | HSQFIGYPIK          | 58  | 9296   | 1.37 | 0.10 | 8  |
| 7 C47E8.5  | LGIHEDSTNRK         | 29  | 12829  | 1.38 | 0.36 | 26 |
| 1 C47E8.5  | GVVDESDLPNISRMLQQSK | 35  | 3887   | 1.38 | 0.16 | 12 |
| 1 C47E8.5  | TLTIMDTGIGMTK       | 75  | 1191   | 1.39 | 0.15 | 11 |
| 22 C47E8.5 | IRYQALTEPSELDTGK    | 33  | 3954   | 1.39 | 0.17 | 12 |
| 22 C47E8.5 | IVMHIK              | 12  | 7584   | 1.39 | 0.07 | 5  |
| 22 C47E8.5 | HSQFIGYPIK          | 61  | 7944   | 1.39 | 0.13 | 9  |
| 22 C47E8.5 | FYEQFGK             | 45  | 5785   | 1.39 | 0.09 | 6  |
| 22 C47E8.5 | HSQFIGYPIK          | 55  | 87925  | 1.40 | 0.09 | 7  |
| 22 C47E8.5 | HSQFIGYPIK          | 55  | 15316  | 1.41 | 0.06 | 4  |
| 22 C47E8.5 | HSQFIGYPIK          | 55  | 87572  | 1.41 | 0.12 | 8  |
| 1 C47E8.5  | HSQFIGYPIK          | 40  | 3063   | 1.41 | 0.18 | 13 |
| 1 C47E8.5  | HLEINPDHAIMK        | 11  | 9641   | 1.41 | 0.30 | 21 |
| 22 C47E8.5 | FYEQFGK             | 26  | 3410   | 1.42 | 0.13 | 9  |
| 22 C47E8.5 | HSQFIGYPIK          | 18  | 754    | 1.43 | 0.14 | 10 |
| 22 C47E8.5 | HSQFIGYPIK          | 47  | 10574  | 1.43 | 0.06 | 4  |
| 7 C47E8.5  | HSQFIGYPIK          | 34  | 21661  | 1.44 | 0.06 | 5  |
| 10 C47E8.5 | HSQFIGYPIK          | 64  | 107263 | 1.44 | 0.10 | 7  |
| 22 C47E8.5 | HSQFIGYPIK          | 44  | 2544   | 1.44 | 0.08 | 6  |
| 1 C47E8.5  | TLTIMDTGIGMTK       | 50  | 1040   | 1.45 | 0.28 | 19 |
| 7 C47E8.5  | SLSNDWEDHLAVK       | 30  | 1658   | 1.45 | 0.19 | 13 |
| 1 C47E8.5  | FYEQFGK             | 30  | 1654   | 1.46 | 0.11 | 7  |
| 22 C47E8.5 | IRYQALTEPSELDTGK    | 78  | 5643   | 1.46 | 0.18 | 12 |
| 1 C47E8.5  | IVMHIK              | 21  | 8572   | 1.47 | 0.17 | 11 |
| 10 C47E8.5 | HSQFIGYPIK          | 42  | 4133   | 1.47 | 0.14 | 10 |
| 10 C47E8.5 | HLEINPDHAIMK        | 23  | 12167  | 1.48 | 0.30 | 20 |
| 22 C47E8.5 | HSQFIGYPIK          | 14  | 13688  | 1.48 | 0.31 | 21 |
| 22 C47E8.5 | HSQFIGYPIK          | 59  | 18363  | 1.49 | 0.07 | 4  |
| 7 C47E8.5  | SLSNDWEDHLAVK       | 44  | 1097   | 1.49 | 0.14 | 9  |
| 1 C47E8.5  | HLEINPDHAIMK        | 15  | 13607  | 1.50 | 0.16 | 10 |
| 7 C47E8.5  | HSQFIGYPIK          | 38  | 5508   | 1.50 | 0.09 | 6  |
| 10 C47E8.5 | LSDFLRYSTSAGDEPTSLK | 13  | 2217   | 1.50 | 0.12 | 8  |
| 10 C47E8.5 | IVMHIK              | 11  | 3462   | 1.51 | 0.16 | 11 |
| 22 C47E8.5 | IVMHIK              | 30  | 6257   | 1.52 | 0.11 | 7  |
| 1 C47E8.5  | SLSNDWEDHLAVK       | 45  | 1020   | 1.52 | 0.16 | 11 |
| 10 C47E8.5 | SLSNDWEDHLAVK       | 79  | 9737   | 1.52 | 0.12 | 8  |
| 1 C47E8.5  | HSQFIGYPIK          | 18  | 1007   | 1.52 | 0.28 | 18 |
| 10 C47E8.5 | IVMHIK              | 26  | 4010   | 1.53 | 0.11 | 7  |
| 22 C47E8.5 | FYEQFGK             | 30  | 5402   | 1.53 | 0.12 | 8  |
| 22 C47E8.5 | FYEQFGK             | 18  | 3021   | 1.55 | 0.11 | 7  |
| 7 C47E8.5  | ADLVNNLGTIAK        | 31  | 925    | 1.55 | 0.10 | 7  |
| 22 C47E8.5 | IVMHIK              | 11  | 6992   | 1.55 | 0.11 | 7  |
| 22 C47E8.5 | FYEQFGK             | 30  | 2396   | 1.56 | 0.15 | 10 |
| 10 C47E8.5 | HSQFIGYPIK          | 22  | 3712   | 1.56 | 0.21 | 13 |
| 7 C47E8.5  | IRYQALTEPSELDTGK    | 85  | 4309   | 1.57 | 0.14 | 9  |
| 22 C47E8.5 | HLEINPDHAIMK        | 12  | 25909  | 1.57 | 0.22 | 14 |
| 1 C47E8.5  | IRYQALTEPSELDTGK    | 19  | 2311   | 1.57 | 0.13 | 8  |
| 10 C47E8.5 | HSQFIGYPIK          | 14  | 1434   | 1.58 | 0.16 | 10 |
| 7 C47E8.5  | ADLVNNLGTIAK        | 24  | 778    | 1.58 | 0.12 | 8  |
| 10 C47E8.5 | HLEINPDHAIMK        | 26  | 16709  | 1.59 | 0.18 | 11 |
| 10 C47E8.5 | FYEQFGK             | 27  | 6632   | 1.60 | 0.10 | 6  |
| 1 C47E8.5  | HSQFIGYPIK          | 25  | 6152   | 1.60 | 0.14 | 8  |
| 7 C47E8.5  | DVVAASAFVERVK       | 46  | 2286   | 1.61 | 0.11 | 7  |
| 10 C47E8.5 | LSDFLRYSTSAGDEPTSLK | 33  | 2471   | 1.61 | 0.10 | 6  |
| 1 C47E8.5  | HLEINPDHAIMK        | 30  | 5996   | 1.62 | 0.36 | 23 |
| 1 C47E8.5  | HSQFIGYPIK          | 49  | 7267   | 1.62 | 0.11 | 7  |
| 1 C47E8.5  | IVMHIK              | 21  | 10517  | 1.62 | 0.17 | 11 |
| 22 C47E8.5 | IVMHIK              | 22  | 6322   | 1.62 | 0.07 | 4  |
| 10 C47E8.5 | TLTIMDTGIGMTK       | 84  | 3164   | 1.63 | 0.11 | 6  |
| 1 C47E8.5  | HSQFIGYPIK          | 35  | 24377  | 1.63 | 0.07 | 5  |
| 7 C47E8.5  | HSQFIGYPIK          | 59  | 22842  | 1.63 | 0.10 | 6  |
| 10 C47E8.5 | HSQFIGYPIK          | 62  | 31208  | 1.63 | 0.09 | 5  |
| 22 C47E8.5 | HSQFIGYPIK          | 50  | 5087   | 1.63 | 0.06 | 4  |
| 22 C47E8.5 | HSQFIGYPIK          | 11  | 8530   | 1.64 | 0.07 | 4  |
| 22 C47E8.5 | FYEQFGK             | 16  | 5208   | 1.64 | 0.12 | 7  |
| 10 C47E8.5 | IVMHIK              | 13  | 3101   | 1.64 | 0.10 | 6  |
| 22 C47E8.5 | FYEQFGK             | 33  | 4895   | 1.64 | 0.10 | 6  |
| 22 C47E8.5 | HSQFIGYPIK          | 18  | 1391   | 1.65 | 0.11 | 7  |
| 10 C47E8.5 | TLTIMDTGIGMTK       | 104 | 5016   | 1.65 | 0.16 | 10 |
| 10 C47E8.5 | HLEINPDHAIMK        | 30  | 18619  | 1.65 | 0.10 | 6  |
| 1 C47E8.5  | IRYQALTEPSELDTGK    | 27  | 2843   | 1.66 | 0.14 | 9  |
| 10 C47E8.5 | TLTIMDTGIGMTK       | 74  | 2297   | 1.67 | 0.17 | 10 |
| 10 C47E8.5 | HSQFIGYPIK          | 39  | 6954   | 1.68 | 0.15 | 9  |
| 22 C47E8.5 | FYEQFGK             | 33  | 3117   | 1.68 | 0.17 | 10 |
| 1 C47E8.5  | IRYQALTEPSELDTGK    | 26  | 1164   | 1.69 | 0.26 | 16 |
| 22 C47E8.5 | ADLVNNLGTIAK        | 18  | 1038   | 1.70 | 0.20 | 12 |
| 10 C47E8.5 | FYEQFGK             | 18  | 6334   | 1.71 | 0.09 | 6  |
| 10 C47E8.5 | HLEINPDHAIMK        | 35  | 23804  | 1.71 | 0.13 | 8  |
| 22 C47E8.5 | IVMHIK              | 10  | 6689   | 1.72 | 0.06 | 3  |
| 10 C47E8.5 | HLEINPDHAIMK        | 58  | 3806   | 1.72 | 0.16 | 9  |
| 7 C47E8.5  | SLSNDWEDHLAVK       | 53  | 1031   | 1.72 | 0.24 | 14 |
| 7 C47E8.5  | IVMHIK              | 14  | 3404   | 1.73 | 0.21 | 12 |
| 7 C47E8.5  | DVVAASAFVERVK       | 28  | 1958   | 1.73 | 0.22 | 13 |
| 10 C47E8.5 | FYEQFGK             | 37  | 4888   | 1.74 | 0.07 | 4  |
| 22 C47E8.5 | HSQFIGYPIK          | 26  | 3421   | 1.74 | 0.25 | 15 |
| 1 C47E8.5  | HLEINPDHAIMK        | 33  | 15284  | 1.74 | 0.40 | 23 |
| 1 C47E8.5  | HSQFIGYPIK          | 42  | 2569   | 1.74 | 0.14 | 8  |
| 1 C47E8.5  | HLEINPDHAIMK        | 20  | 11356  | 1.74 | 0.26 | 15 |
| 10 C47E8.5 | FYEQFGK             | 33  | 4618   | 1.75 | 0.13 | 7  |
| 1 C47E8.5  | HSQFIGYPIK          | 50  | 4300   | 1.75 | 0.16 | 9  |
| 1 C47E8.5  | IVMHIK              | 26  | 5263   | 1.75 | 0.13 | 8  |
| 1 C47E8.5  | HSQFIGYPIK          | 47  | 11211  | 1.75 | 0.07 | 4  |

|            |                     |    |       |      |      |    |
|------------|---------------------|----|-------|------|------|----|
| 7 C47E8.5  | FYEQFGK             | 34 | 2817  | 1.76 | 0.20 | 11 |
| 10 C47E8.5 | HSQFIGYPIK          | 64 | 12329 | 1.76 | 0.10 | 6  |
| 22 C47E8.5 | HSQFIGYPIK          | 39 | 6062  | 1.76 | 0.12 | 7  |
| 22 C47E8.5 | LSDFLRYSTSAGDEPTSLK | 29 | 1951  | 1.76 | 0.10 | 6  |
| 7 C47E8.5  | SLSNDWEDHLAVK       | 66 | 1358  | 1.77 | 0.17 | 9  |
| 10 C47E8.5 | HLEINPDHAIMK        | 12 | 20405 | 1.77 | 0.15 | 9  |
| 1 C47E8.5  | HLEINPDHAIMK        | 27 | 3573  | 1.78 | 0.27 | 15 |
| 7 C47E8.5  | IVMHIK              | 17 | 2199  | 1.78 | 0.15 | 8  |
| 10 C47E8.5 | HSQFIGYPIK          | 10 | 2609  | 1.79 | 0.13 | 7  |
| 10 C47E8.5 | HSQFIGYPIK          | 57 | 27277 | 1.80 | 0.06 | 4  |
| 7 C47E8.5  | HSQFIGYPIK          | 37 | 5872  | 1.80 | 0.17 | 9  |
| 22 C47E8.5 | IVMHIK              | 10 | 2924  | 1.81 | 0.14 | 8  |
| 10 C47E8.5 | TLTIMDTGIGMTK       | 38 | 1798  | 1.81 | 0.20 | 11 |
| 10 C47E8.5 | IVMHIK              | 18 | 32177 | 1.82 | 0.07 | 4  |
| 7 C47E8.5  | IVMHIK              | 20 | 7983  | 1.82 | 0.18 | 10 |
| 10 C47E8.5 | FYEQFGK             | 17 | 4681  | 1.83 | 0.11 | 6  |
| 10 C47E8.5 | HSQFIGYPIK          | 57 | 27178 | 1.84 | 0.08 | 4  |
| 10 C47E8.5 | LGIHEDSTNRK         | 17 | 13574 | 1.84 | 0.39 | 21 |
| 1 C47E8.5  | FYEQFGK             | 30 | 2473  | 1.85 | 0.11 | 6  |
| 22 C47E8.5 | TLTIMDTGIGMTK       | 52 | 1569  | 1.86 | 0.17 | 9  |
| 10 C47E8.5 | IRYQALTEPSELDTGK    | 35 | 6976  | 1.86 | 0.15 | 8  |
| 7 C47E8.5  | IRYQALTEPSELDTGK    | 16 | 555   | 1.87 | 0.17 | 9  |
| 10 C47E8.5 | TLTIMDTGIGMTK       | 73 | 2593  | 1.87 | 0.15 | 8  |
| 10 C47E8.5 | TLTIMDTGIGMTK       | 62 | 2341  | 1.88 | 0.14 | 8  |
| 10 C47E8.5 | HSQFIGYPIK          | 63 | 10947 | 1.88 | 0.07 | 4  |
| 7 C47E8.5  | IVMHIK              | 12 | 6862  | 1.89 | 0.13 | 7  |
| 1 C47E8.5  | HSQFIGYPIK          | 35 | 2633  | 1.89 | 0.08 | 4  |
| 10 C47E8.5 | HSQFIGYPIK          | 41 | 3726  | 1.90 | 0.17 | 9  |
| 10 C47E8.5 | HSQFIGYPIK          | 49 | 7727  | 1.93 | 0.09 | 5  |
| 1 C47E8.5  | HSQFIGYPIK          | 60 | 4678  | 1.94 | 0.09 | 5  |
| 1 C47E8.5  | IVMHIK              | 23 | 9725  | 1.97 | 0.19 | 10 |
| 22 C47E8.5 | IVMHIK              | 13 | 6648  | 1.98 | 0.08 | 4  |
| 1 C47E8.5  | IVMHIK              | 22 | 9557  | 1.99 | 0.23 | 12 |
| 10 C47E8.5 | FYEQFGK             | 15 | 4151  | 1.99 | 0.08 | 4  |
| 22 C47E8.5 | IVMHIK              | 21 | 8659  | 2.00 | 0.10 | 5  |
| 1 C47E8.5  | TLTIMDTGIGMTK       | 53 | 1097  | 2.00 | 0.12 | 6  |
| 22 C47E8.5 | HLEINPDHAIMK        | 16 | 15377 | 2.01 | 0.09 | 4  |
| 10 C47E8.5 | ADLVNNLGTIK         | 11 | 988   | 2.01 | 0.06 | 3  |
| 22 C47E8.5 | HLEINPDHAIMK        | 22 | 37872 | 2.01 | 0.07 | 4  |
| 10 C47E8.5 | HLEINPDHAIMK        | 59 | 3321  | 2.01 | 0.10 | 5  |
| 10 C47E8.5 | FYEQFGK             | 20 | 3927  | 2.03 | 0.10 | 5  |
| 10 C47E8.5 | IVMHIK              | 18 | 38652 | 2.04 | 0.09 | 4  |
| 10 C47E8.5 | TLTIMDTGIGMTK       | 21 | 1763  | 2.05 | 0.09 | 5  |
| 22 C47E8.5 | HLEINPDHAIMK        | 31 | 44504 | 2.06 | 0.19 | 9  |
| 1 C47E8.5  | FYEQFGK             | 27 | 1831  | 2.07 | 0.17 | 8  |
| 10 C47E8.5 | FYEQFGK             | 21 | 3211  | 2.09 | 0.15 | 7  |
| 1 C47E8.5  | IVMHIK              | 27 | 5032  | 2.10 | 0.20 | 10 |
| 22 C47E8.5 | CMELIDEVAEDK        | 57 | 1824  | 2.10 | 0.28 | 13 |
| 1 C47E8.5  | ADLVNNLGTIK         | 13 | 638   | 2.11 | 0.27 | 13 |
| 22 C47E8.5 | HLEINPDHAIMK        | 21 | 51740 | 2.11 | 0.33 | 16 |
| 10 C47E8.5 | IRYQALTEPSELDTGK    | 56 | 4619  | 2.12 | 0.18 | 8  |
| 10 C47E8.5 | HSQFIGYPIK          | 60 | 25766 | 2.12 | 0.13 | 6  |
| 7 C47E8.5  | IVMHIK              | 10 | 1965  | 2.13 | 0.19 | 9  |
| 1 C47E8.5  | HSQFIGYPIK          | 48 | 3303  | 2.14 | 0.12 | 6  |
| 1 C47E8.5  | HLEINPDHAIMK        | 11 | 7569  | 2.14 | 0.19 | 9  |
| 1 C47E8.5  | HSQFIGYPIK          | 49 | 3038  | 2.15 | 0.15 | 7  |
| 1 C47E8.5  | FYEQFGK             | 13 | 1574  | 2.18 | 0.14 | 7  |
| 10 C47E8.5 | IRYQALTEPSELDTGK    | 44 | 3544  | 2.18 | 0.10 | 4  |
| 10 C47E8.5 | ADLVNNLGTIK         | 11 | 909   | 2.19 | 0.09 | 4  |
| 1 C47E8.5  | HLEINPDHAIMK        | 20 | 5745  | 2.20 | 0.19 | 9  |
| 1 C47E8.5  | IRYQALTEPSELDTGK    | 45 | 1591  | 2.21 | 0.20 | 9  |
| 22 C47E8.5 | HLEINPDHAIMK        | 12 | 6427  | 2.21 | 0.17 | 8  |
| 10 C47E8.5 | FYEQFGK             | 32 | 3160  | 2.24 | 0.12 | 5  |
| 10 C47E8.5 | HLEINPDHAIMK        | 19 | 7651  | 2.24 | 0.16 | 7  |
| 1 C47E8.5  | ADLVNNLGTIK         | 43 | 849   | 2.28 | 0.17 | 7  |
| 10 C47E8.5 | HSQFIGYPIK          | 58 | 22570 | 2.29 | 0.07 | 3  |
| 10 C47E8.5 | FYEQFGK             | 44 | 3672  | 2.33 | 0.11 | 5  |
| 22 C47E8.5 | HLEINPDHAIMK        | 13 | 42845 | 2.33 | 0.34 | 15 |
| 10 C47E8.5 | HLEINPDHAIMK        | 22 | 5826  | 2.36 | 0.14 | 6  |
| 1 C47E8.5  | FYEQFGK             | 12 | 1145  | 2.36 | 0.11 | 5  |
| 22 C47E8.5 | HSQFIGYPIK          | 15 | 1279  | 2.36 | 0.26 | 11 |
| 22 C47E8.5 | HLEINPDHAIMK        | 16 | 28840 | 2.36 | 0.19 | 8  |
| 7 C47E8.5  | FYEQFGK             | 27 | 4202  | 2.38 | 0.15 | 6  |
| 22 C47E8.5 | HLEINPDHAIMK        | 31 | 57125 | 2.41 | 0.17 | 7  |
| 10 C47E8.5 | IRYQALTEPSELDTGK    | 20 | 5319  | 2.41 | 0.19 | 8  |
| 1 C47E8.5  | ADLVNNLGTIK         | 63 | 1139  | 2.41 | 0.12 | 5  |
| 7 C47E8.5  | HSQFIGYPIK          | 11 | 1570  | 2.47 | 0.12 | 5  |
| 7 C47E8.5  | HSQFIGYPIK          | 13 | 912   | 2.47 | 0.11 | 4  |
| 1 C47E8.5  | HSQFIGYPIK          | 27 | 1140  | 2.49 | 0.25 | 10 |
| 7 C47E8.5  | HLEINPDHAIMK        | 12 | 2913  | 2.50 | 0.18 | 7  |
| 22 C47E8.5 | HLEINPDHAIMK        | 18 | 14245 | 2.50 | 0.11 | 4  |
| 10 C47E8.5 | IVMHIK              | 28 | 4657  | 2.55 | 0.10 | 4  |
| 1 C47E8.5  | HLEINPDHAIMK        | 30 | 4797  | 2.55 | 0.21 | 8  |
| 7 C47E8.5  | HSQFIGYPIK          | 35 | 5270  | 2.58 | 0.12 | 5  |
| 7 C47E8.5  | HSQFIGYPIK          | 35 | 4177  | 2.63 | 0.09 | 4  |
| 10 C47E8.5 | IVMHIK              | 26 | 4897  | 2.63 | 0.12 | 5  |
| 1 C47E8.5  | HLEINPDHAIMK        | 13 | 7446  | 2.64 | 0.14 | 5  |
| 7 C47E8.5  | DVVAASAFVERVK       | 34 | 2994  | 2.65 | 0.26 | 10 |
| 10 C47E8.5 | IRYQALTEPSELDTGK    | 48 | 5134  | 2.66 | 0.28 | 10 |
| 22 C47E8.5 | HLEINPDHAIMK        | 19 | 9201  | 2.67 | 0.18 | 7  |
| 22 C47E8.5 | HSQFIGYPIK          | 19 | 827   | 2.70 | 0.15 | 6  |
| 10 C47E8.5 | HLEINPDHAIMK        | 25 | 51504 | 2.70 | 0.25 | 9  |
| 22 C47E8.5 | HLEINPDHAIMK        | 17 | 14806 | 2.73 | 0.19 | 7  |
| 10 C47E8.5 | HLEINPDHAIMK        | 15 | 34317 | 2.74 | 0.20 | 7  |
| 7 C47E8.5  | HLEINPDHAIMK        | 12 | 2569  | 2.76 | 0.11 | 4  |
| 10 C47E8.5 | IRYQALTEPSELDTGK    | 64 | 5360  | 2.81 | 0.05 | 2  |
| 10 C47E8.5 | IVMHIK              | 23 | 4585  | 2.84 | 0.07 | 3  |
| 10 C47E8.5 | HLEINPDHAIMK        | 21 | 47463 | 2.88 | 0.17 | 6  |
| 7 C47E8.5  | HSQFIGYPIK          | 38 | 2010  | 2.93 | 0.13 | 4  |
| 7 C47E8.5  | IVMHIK              | 13 | 1171  | 2.95 | 0.14 | 5  |
| 10 C47E8.5 | HSQFIGYPIK          | 45 | 3237  | 2.99 | 0.09 | 3  |

|                    |                      |    |       |       |      |    |
|--------------------|----------------------|----|-------|-------|------|----|
| 10 C47E8.5         | HSQFIGYPIK           | 36 | 2213  | 3.01  | 0.07 | 2  |
| 7 C47E8.5          | HSQFIGYPIK           | 16 | 1054  | 3.16  | 0.13 | 4  |
| 10 C47E8.5         | HLEINPDHAIMK         | 34 | 9373  | 3.29  | 0.17 | 5  |
| 10 C47E8.5         | HLEINPDHAIMK         | 28 | 45788 | 3.31  | 0.15 | 5  |
| 7 C47E8.5          | HLEINPDHAIMK         | 15 | 4040  | 3.45  | 0.42 | 12 |
| 7 C47E8.5          | HLEINPDHAIMK         | 12 | 9746  | 3.47  | 0.20 | 6  |
| 22 C47E8.5         | HLEINPDHAIMK         | 19 | 13368 | 3.54  | 0.13 | 4  |
| 7 C47E8.5          | HLEINPDHAIMK         | 26 | 32102 | 3.61  | 0.11 | 3  |
| 7 C47E8.5          | FYEQFGK              | 15 | 2916  | 3.63  | 0.22 | 6  |
| 7 C47E8.5          | SLSNDWEDHLAVK        | 45 | 1466  | 3.67  | 0.35 | 9  |
| 10 C47E8.5         | HLEINPDHAIMK         | 12 | 7577  | 3.77  | 0.25 | 7  |
| 7 C47E8.5          | HLEINPDHAIMK         | 10 | 4937  | 3.79  | 0.10 | 3  |
| 1 C47E8.5          | CMELIDEVAEDK         | 47 | 1263  | 3.86  | 0.33 | 8  |
| 22 C47E8.5         | CMELIDEVAEDK         | 72 | 2216  | 4.05  | 0.41 | 10 |
| 7 C47E8.5          | HLEINPDHAIMK         | 12 | 6602  | 4.27  | 0.07 | 2  |
| 7 C47E8.5          | IVMHIK               | 14 | 1239  | 4.35  | 0.07 | 2  |
| 7 C47E8.5          | HSQFIGYPIK           | 24 | 1511  | 4.85  | 0.22 | 4  |
| 10 C47E8.5         | CMELIDEVAEDK         | 50 | 4610  | 4.87  | 0.34 | 7  |
| 7 C47E8.5          | SLSNDWEDHLAVK        | 38 | 2288  | 8.22  | 0.30 | 4  |
| 10 C47E8.5         | CMELIDEVAEDK         | 65 | 5580  | 8.78  | 0.27 | 3  |
| 10 C47E8.5         | CMELIDEVAEDK         | 63 | 1906  | 8.80  | 0.29 | 3  |
| 7 C47E8.5          | HSQFIGYPIK           | 55 | 4612  | 10.06 | 0.36 | 4  |
| 7 C47E8.5          | SLSNDWEDHLAVK        | 45 | 2467  | 14.62 | 0.43 | 3  |
| 7 C47E8.5          | FYEQFGK              | 25 | 2724  | 15.03 | 0.15 | 1  |
| 10 C49F5.1         | INAECHK              | 33 | 10992 | 0.43  | 0.11 | 26 |
| 10 C49F5.1         | INAECHK              | 35 | 12071 | 0.45  | 0.18 | 39 |
| 10 C49F5.1         | INAECHK              | 40 | 5190  | 0.56  | 0.28 | 51 |
| 10 C49F5.1         | ISPALLEK             | 23 | 10230 | 0.58  | 0.11 | 19 |
| 10 C49F5.1         | FLFTSESVSEGHDPK      | 30 | 1448  | 0.60  | 0.10 | 16 |
| 10 C49F5.1         | IGFTDSSIGFDHK        | 44 | 5842  | 0.65  | 0.07 | 11 |
| 10 C49F5.1         | ISPALLEK             | 16 | 4975  | 0.65  | 0.21 | 32 |
| 10 C49F5.1         | TAENGHFGHSEFPWEQPK   | 18 | 6872  | 0.68  | 0.07 | 10 |
| 10 C49F5.1         | IGFTDSSIGFDHK        | 54 | 5255  | 0.71  | 0.07 | 10 |
| 10 C49F5.1         | FLFTSESVSEGHDPK      | 75 | 6350  | 0.84  | 0.09 | 10 |
| 10 C49F5.1         | TAENGHFGHSEFPWEQPK   | 31 | 6070  | 0.90  | 0.10 | 11 |
| 10 C49F5.1         | TAENGHFGHSEFPWEQPK   | 29 | 9310  | 0.91  | 0.13 | 14 |
| 10 C49F5.1         | TAENGHFGHSEFPWEQPK   | 15 | 3790  | 0.91  | 0.19 | 20 |
| 10 C49F5.1         | FLFTSESVSEGHDPK      | 72 | 6497  | 0.94  | 0.15 | 16 |
| 10 C49F5.1         | TAENGHFGHSEFPWEQPK   | 24 | 4036  | 1.02  | 0.18 | 17 |
| 10 C49F5.1         | INAECHK              | 44 | 8254  | 1.02  | 0.17 | 16 |
| 10 C49F5.1         | INAECHK              | 30 | 11546 | 1.03  | 0.09 | 9  |
| 10 C49F5.1         | LRETILADVIK          | 16 | 1038  | 1.30  | 0.43 | 33 |
| 10 C49F5.1         | FLFTSESVSEGHDPK      | 48 | 1634  | 1.49  | 0.42 | 29 |
| 10 C49F5.1         | LRETILADVIK          | 20 | 2079  | 1.60  | 0.07 | 4  |
| 10 C49F5.1         | MCDQISDAVLDAHLK      | 55 | 10283 | 3.75  | 0.29 | 8  |
| 10 C49F5.1         | INAECHK              | 35 | 5125  | 4.21  | 0.23 | 6  |
| 10 C49F5.1         | INAECHK              | 25 | 5202  | 5.60  | 0.11 | 2  |
| 10 C49F5.1         | INAECHK              | 42 | 7003  | 6.09  | 0.18 | 3  |
| 10 C49F5.1         | IIVDTYGGWGAHGGGAFSGK | 66 | 2324  | 11.60 | 0.32 | 3  |
| 10 C49F5.1         | TAENGHFGHSEFPWEQPK   | 64 | 12506 | 12.25 | 0.09 | 1  |
| 10 C49F5.1         | TAENGHFGHSEFPWEQPK   | 46 | 13047 | 12.44 | 0.41 | 3  |
| 10 C49F5.1         | TAENGHFGHSEFPWEQPK   | 51 | 15556 | 15.31 | 0.38 | 2  |
| 10 C49F5.1         | IGFTDSSIGFDHK        | 54 | 7628  | 17.65 | 0.23 | 1  |
| 10 C49F5.1         | FLFTSESVSEGHDPK      | 74 | 5214  | 20.83 | 0.28 | 1  |
| 10 C49F5.1         | FLFTSESVSEGHDPK      | 75 | 9087  | 23.36 | 0.19 | 1  |
| 7 C49F5.1;C06E7.1b | IGFTDSSIGFDHK        | 59 | 3108  | 0.30  | 0.15 | 52 |
| 7 C49F5.1;C06E7.1b | INAECHK              | 17 | 2604  | 0.35  | 0.15 | 43 |
| 1 C49F5.1;C06E7.1b | INAECHK              | 33 | 2374  | 0.35  | 0.10 | 28 |
| 1 C49F5.1;C06E7.1b | INAECHK              | 42 | 3513  | 0.53  | 0.07 | 13 |
| 7 C49F5.1;C06E7.1b | TAENGHFGHSEFPWEQPK   | 30 | 4924  | 0.55  | 0.24 | 44 |
| 7 C49F5.1;C06E7.1b | FLFTSESVSEGHDPK      | 81 | 1539  | 0.55  | 0.12 | 22 |
| 7 C49F5.1;C06E7.1b | TAENGHFGHSEFPWEQPK   | 27 | 3830  | 0.59  | 0.22 | 37 |
| 7 C49F5.1;C06E7.1b | FLFTSESVSEGHDPK      | 53 | 3382  | 0.60  | 0.15 | 25 |
| 7 C49F5.1;C06E7.1b | INAECHK              | 33 | 2314  | 0.63  | 0.11 | 17 |
| 7 C49F5.1;C06E7.1b | FLFTSESVSEGHDPK      | 64 | 2245  | 0.64  | 0.14 | 22 |
| 7 C49F5.1;C06E7.1b | ISPALLEK             | 21 | 3928  | 0.65  | 0.31 | 48 |
| 7 C49F5.1;C06E7.1b | IGFTDSSIGFDHK        | 73 | 4938  | 0.65  | 0.12 | 19 |
| 7 C49F5.1;C06E7.1b | FLFTSESVSEGHDPK      | 79 | 1585  | 0.65  | 0.15 | 22 |
| 1 C49F5.1;C06E7.1b | INAECHK              | 44 | 7998  | 0.66  | 0.24 | 37 |
| 7 C49F5.1;C06E7.1b | INAECHK              | 37 | 4849  | 0.68  | 0.11 | 16 |
| 7 C49F5.1;C06E7.1b | LRETILADVIK          | 20 | 1155  | 0.68  | 0.20 | 30 |
| 1 C49F5.1;C06E7.1b | TAENGHFGHSEFPWEQPK   | 15 | 3474  | 0.69  | 0.26 | 38 |
| 7 C49F5.1;C06E7.1b | FLFTSESVSEGHDPK      | 26 | 743   | 0.70  | 0.25 | 35 |
| 7 C49F5.1;C06E7.1b | IGFTDSSIGFDHK        | 30 | 2259  | 0.71  | 0.06 | 9  |
| 7 C49F5.1;C06E7.1b | INAECHK              | 32 | 6152  | 0.72  | 0.24 | 33 |
| 1 C49F5.1;C06E7.1b | INAECHK              | 34 | 8160  | 0.73  | 0.10 | 14 |
| 1 C49F5.1;C06E7.1b | INAECHK              | 32 | 3662  | 0.75  | 0.14 | 18 |
| 7 C49F5.1;C06E7.1b | TAENGHFGHSEFPWEQPK   | 26 | 3525  | 0.76  | 0.20 | 26 |
| 7 C49F5.1;C06E7.1b | FLFTSESVSEGHDPK      | 12 | 2806  | 0.78  | 0.14 | 19 |
| 7 C49F5.1;C06E7.1b | IGFTDSSIGFDHK        | 30 | 1872  | 0.79  | 0.08 | 10 |
| 7 C49F5.1;C06E7.1b | INAECHK              | 37 | 2875  | 0.79  | 0.18 | 23 |
| 7 C49F5.1;C06E7.1b | INAECHK              | 40 | 3175  | 0.79  | 0.17 | 22 |
| 7 C49F5.1;C06E7.1b | FLFTSESVSEGHDPK      | 87 | 3362  | 0.81  | 0.05 | 6  |
| 7 C49F5.1;C06E7.1b | IGFTDSSIGFDHK        | 27 | 3524  | 0.83  | 0.21 | 26 |
| 7 C49F5.1;C06E7.1b | TAENGHFGHSEFPWEQPK   | 13 | 4903  | 0.85  | 0.24 | 28 |
| 7 C49F5.1;C06E7.1b | ISPALLEK             | 15 | 4546  | 0.86  | 0.12 | 14 |
| 7 C49F5.1;C06E7.1b | IGFTDSSIGFDHK        | 43 | 2819  | 0.88  | 0.14 | 16 |
| 1 C49F5.1;C06E7.1b | IGFTDSSIGFDHK        | 28 | 3180  | 0.89  | 0.17 | 19 |
| 7 C49F5.1;C06E7.1b | IGFTDSSIGFDHK        | 21 | 1638  | 0.90  | 0.09 | 10 |
| 7 C49F5.1;C06E7.1b | ISPALLEK             | 38 | 13787 | 0.91  | 0.05 | 6  |
| 1 C49F5.1;C06E7.1b | IGFTDSSIGFDHK        | 44 | 3074  | 0.92  | 0.12 | 13 |
| 7 C49F5.1;C06E7.1b | INAECHK              | 22 | 2935  | 0.92  | 0.36 | 39 |
| 7 C49F5.1;C06E7.1b | INAECHK              | 21 | 5920  | 0.93  | 0.16 | 17 |
| 7 C49F5.1;C06E7.1b | INAECHK              | 26 | 6301  | 0.93  | 0.18 | 20 |
| 7 C49F5.1;C06E7.1b | ISPALLEK             | 27 | 11853 | 1.00  | 0.12 | 12 |
| 7 C49F5.1;C06E7.1b | FLFTSESVSEGHDPK      | 60 | 2588  | 1.02  | 0.15 | 14 |
| 7 C49F5.1;C06E7.1b | TAENGHFGHSEFPWEQPK   | 53 | 11828 | 1.02  | 0.08 | 8  |
| 1 C49F5.1;C06E7.1b | TAENGHFGHSEFPWEQPK   | 20 | 4425  | 1.02  | 0.14 | 14 |
| 1 C49F5.1;C06E7.1b | FLFTSESVSEGHDPK      | 61 | 3515  | 1.11  | 0.12 | 10 |
| 7 C49F5.1;C06E7.1b | INAECHK              | 40 | 3653  | 1.12  | 0.14 | 12 |
| 7 C49F5.1;C06E7.1b | MCDQISDAVLDAHLK      | 52 | 1622  | 1.16  | 0.19 | 17 |

|                    |                         |     |        |      |      |    |
|--------------------|-------------------------|-----|--------|------|------|----|
| 7 C49F5.1;C06E7.1b | TAENGHFGHSEFPWEQPK      | 12  | 2528   | 1.17 | 0.08 | 7  |
| 7 C49F5.1;C06E7.1b | FLFTSESVSEGHDPK         | 83  | 4007   | 1.19 | 0.07 | 6  |
| 7 C49F5.1;C06E7.1b | FLFTSESVSEGHDPK         | 78  | 2702   | 1.23 | 0.09 | 7  |
| 1 C49F5.1;C06E7.1b | INAEHLK                 | 27  | 3019   | 1.24 | 0.10 | 8  |
| 7 C49F5.1;C06E7.1b | MCDQISDAVLDAHLK         | 89  | 1625   | 1.24 | 0.16 | 13 |
| 1 C49F5.1;C06E7.1b | LRETILADVIK             | 19  | 951    | 1.25 | 0.11 | 9  |
| 1 C49F5.1;C06E7.1b | FLFTSESVSEGHDPK         | 48  | 2751   | 1.30 | 0.17 | 13 |
| 7 C49F5.1;C06E7.1b | INAEHLK                 | 36  | 3690   | 1.32 | 0.09 | 7  |
| 7 C49F5.1;C06E7.1b | MCDQISDAVLDAHLK         | 67  | 2605   | 1.37 | 0.15 | 11 |
| 7 C49F5.1;C06E7.1b | VACETVTK                | 16  | 1008   | 1.38 | 0.47 | 34 |
| 7 C49F5.1;C06E7.1b | TAENGHFGHSEFPWEQPK      | 41  | 4257   | 1.38 | 0.13 | 9  |
| 7 C49F5.1;C06E7.1b | MCDQISDAVLDAHLK         | 74  | 2528   | 1.39 | 0.11 | 8  |
| 7 C49F5.1;C06E7.1b | TAENGHFGHSEFPWEQPK      | 41  | 5402   | 1.44 | 0.13 | 9  |
| 7 C49F5.1;C06E7.1b | FLFTSESVSEGHDPK         | 11  | 5822   | 1.61 | 0.09 | 5  |
| 1 C49F5.1;C06E7.1b | TAENGHFGHSEFPWEQPK      | 12  | 1453   | 1.66 | 0.16 | 9  |
| 7 C49F5.1;C06E7.1b | FLFTSESVSEGHDPK         | 83  | 3960   | 1.66 | 0.07 | 4  |
| 7 C49F5.1;C06E7.1b | INAEHLK                 | 45  | 2397   | 1.67 | 0.10 | 6  |
| 7 C49F5.1;C06E7.1b | INAEHLK                 | 31  | 2161   | 1.71 | 0.08 | 5  |
| 1 C49F5.1;C06E7.1b | LRETILADVIK             | 18  | 641    | 1.84 | 0.14 | 8  |
| 7 C49F5.1;C06E7.1b | INAEHLK                 | 18  | 2666   | 1.91 | 0.55 | 29 |
| 7 C49F5.1;C06E7.1b | FLFTSESVSEGHDPK         | 67  | 3211   | 1.93 | 0.08 | 4  |
| 7 C49F5.1;C06E7.1b | TAENGHFGHSEFPWEQPK      | 13  | 3242   | 2.45 | 0.16 | 6  |
| 22 C49F5.1;C56G3.2 | TCNVLVALEQQSPEIAAGVHVNK | 47  | 6809   | 0.40 | 0.29 | 72 |
| 22 C49F5.1;C56G3.2 | FLFTSESVSEGHDPK         | 12  | 5581   | 0.40 | 0.25 | 63 |
| 22 C49F5.1;C56G3.2 | TCNVLVALEQQSPEIAAGVHVNK | 41  | 8043   | 0.41 | 0.15 | 36 |
| 22 C49F5.1;C56G3.2 | IGFTDSSIGFDHK           | 66  | 7144   | 0.44 | 0.16 | 38 |
| 22 C49F5.1;C56G3.2 | TCNVLVALEQQSPEIAAGVHVNK | 52  | 7352   | 0.47 | 0.21 | 44 |
| 22 C49F5.1;C56G3.2 | INAEHLK                 | 38  | 14238  | 0.47 | 0.22 | 47 |
| 22 C49F5.1;C56G3.2 | IIVDTYGGWGAHGGGAFSGK    | 91  | 3867   | 0.49 | 0.22 | 45 |
| 22 C49F5.1;C56G3.2 | ISPALLEK                | 32  | 15616  | 0.51 | 0.09 | 18 |
| 22 C49F5.1;C56G3.2 | INAEHLK                 | 38  | 12245  | 0.51 | 0.05 | 10 |
| 22 C49F5.1;C56G3.2 | INAEHLK                 | 36  | 74243  | 0.52 | 0.19 | 36 |
| 22 C49F5.1;C56G3.2 | FLFTSESVSEGHDPK         | 50  | 38976  | 0.52 | 0.20 | 39 |
| 22 C49F5.1;C56G3.2 | FLFTSESVSEGHDPK         | 76  | 43041  | 0.56 | 0.05 | 8  |
| 22 C49F5.1;C56G3.2 | IIVDTYGGWGAHGGGAFSGK    | 78  | 3173   | 0.56 | 0.15 | 27 |
| 22 C49F5.1;C56G3.2 | IGFTDSSIGFDHK           | 51  | 5172   | 0.56 | 0.13 | 24 |
| 22 C49F5.1;C56G3.2 | FLFTSESVSEGHDPK         | 25  | 17057  | 0.58 | 0.20 | 35 |
| 22 C49F5.1;C56G3.2 | INAEHLK                 | 31  | 2333   | 0.59 | 0.28 | 48 |
| 22 C49F5.1;C56G3.2 | ISPALLEK                | 25  | 6040   | 0.60 | 0.12 | 20 |
| 22 C49F5.1;C56G3.2 | INAEHLK                 | 50  | 100198 | 0.60 | 0.11 | 18 |
| 22 C49F5.1;C56G3.2 | IGFTDSSIGFDHK           | 33  | 3797   | 0.62 | 0.13 | 21 |
| 22 C49F5.1;C56G3.2 | INAEHLK                 | 36  | 9971   | 0.62 | 0.09 | 15 |
| 22 C49F5.1;C56G3.2 | MCDQISDAVLDAHLK         | 108 | 9464   | 0.63 | 0.12 | 19 |
| 22 C49F5.1;C56G3.2 | TAENGHFGHSEFPWEQPK      | 47  | 63726  | 0.63 | 0.14 | 22 |
| 22 C49F5.1;C56G3.2 | ISPALLEK                | 25  | 31114  | 0.67 | 0.13 | 20 |
| 22 C49F5.1;C56G3.2 | MCDQISDAVLDAHLK         | 91  | 7063   | 0.70 | 0.09 | 13 |
| 22 C49F5.1;C56G3.2 | FLFTSESVSEGHDPK         | 47  | 4459   | 0.73 | 0.20 | 27 |
| 22 C49F5.1;C56G3.2 | TAENGHFGHSEFPWEQPK      | 34  | 69887  | 0.75 | 0.13 | 17 |
| 22 C49F5.1;C56G3.2 | TAENGHFGHSEFPWEQPK      | 10  | 6359   | 0.77 | 0.12 | 15 |
| 22 C49F5.1;C56G3.2 | LRETILADVIK             | 22  | 1031   | 0.82 | 0.10 | 12 |
| 22 C49F5.1;C56G3.2 | ISPALLEK                | 33  | 249720 | 0.83 | 0.12 | 15 |
| 22 C49F5.1;C56G3.2 | ISPALLEK                | 37  | 206702 | 0.86 | 0.08 | 10 |
| 22 C49F5.1;C56G3.2 | TAENGHFGHSEFPWEQPK      | 27  | 2685   | 0.87 | 0.25 | 29 |
| 22 C49F5.1;C56G3.2 | INAEHLK                 | 47  | 3703   | 0.89 | 0.22 | 25 |
| 22 C49F5.1;C56G3.2 | INAEHLK                 | 37  | 8266   | 0.90 | 0.32 | 36 |
| 22 C49F5.1;C56G3.2 | TAENGHFGHSEFPWEQPK      | 16  | 2801   | 0.93 | 0.16 | 18 |
| 22 C49F5.1;C56G3.2 | TAENGHFGHSEFPWEQPK      | 19  | 11670  | 0.93 | 0.08 | 8  |
| 22 C49F5.1;C56G3.2 | TAENGHFGHSEFPWEQPK      | 14  | 4536   | 0.93 | 0.15 | 16 |
| 22 C49F5.1;C56G3.2 | TAENGHFGHSEFPWEQPK      | 29  | 2420   | 0.94 | 0.15 | 16 |
| 22 C49F5.1;C56G3.2 | TAENGHFGHSEFPWEQPK      | 32  | 14181  | 0.95 | 0.12 | 12 |
| 22 C49F5.1;C56G3.2 | TAENGHFGHSEFPWEQPK      | 41  | 3745   | 0.97 | 0.21 | 22 |
| 22 C49F5.1;C56G3.2 | MCDQISDAVLDAHLK         | 80  | 8471   | 0.97 | 0.10 | 10 |
| 22 C49F5.1;C56G3.2 | MCDQISDAVLDAHLK         | 91  | 9822   | 0.99 | 0.13 | 13 |
| 22 C49F5.1;C56G3.2 | MCDQISDAVLDAHLK         | 11  | 5612   | 0.99 | 0.19 | 19 |
| 22 C49F5.1;C56G3.2 | TAENGHFGHSEFPWEQPK      | 10  | 7217   | 1.02 | 0.19 | 18 |
| 22 C49F5.1;C56G3.2 | TAENGHFGHSEFPWEQPK      | 19  | 3981   | 1.05 | 0.22 | 21 |
| 22 C49F5.1;C56G3.2 | VACETVTK                | 11  | 2399   | 1.08 | 0.20 | 19 |
| 22 C49F5.1;C56G3.2 | INAEHLK                 | 40  | 2446   | 1.09 | 0.24 | 22 |
| 22 C49F5.1;C56G3.2 | ISPALLEK                | 14  | 715    | 1.10 | 0.17 | 15 |
| 22 C49F5.1;C56G3.2 | TAENGHFGHSEFPWEQPK      | 16  | 5457   | 1.11 | 0.09 | 8  |
| 22 C49F5.1;C56G3.2 | INAEHLK                 | 36  | 3326   | 1.13 | 0.09 | 8  |
| 22 C49F5.1;C56G3.2 | FLFTSESVSEGHDPK         | 47  | 3339   | 1.15 | 0.14 | 12 |
| 22 C49F5.1;C56G3.2 | IGFTDSSIGFDHK           | 76  | 19107  | 1.18 | 0.10 | 9  |
| 22 C49F5.1;C56G3.2 | TAENGHFGHSEFPWEQPK      | 15  | 2614   | 1.21 | 0.19 | 16 |
| 22 C49F5.1;C56G3.2 | TAENGHFGHSEFPWEQPK      | 28  | 14936  | 1.22 | 0.09 | 7  |
| 22 C49F5.1;C56G3.2 | INAEHLK                 | 36  | 3150   | 1.31 | 0.26 | 20 |
| 22 C49F5.1;C56G3.2 | IGFTDSSIGFDHK           | 73  | 12317  | 1.35 | 0.07 | 5  |
| 22 C49F5.1;C56G3.2 | FLFTSESVSEGHDPK         | 11  | 3261   | 1.45 | 0.23 | 16 |
| 22 C49F5.1;C56G3.2 | LRETILADVIK             | 16  | 1859   | 1.46 | 0.15 | 10 |
| 22 C49F5.1;C56G3.2 | LRETILADVIK             | 15  | 1604   | 1.52 | 0.22 | 15 |
| 22 C49F5.1;C56G3.2 | FLFTSESVSEGHDPK         | 12  | 8059   | 1.54 | 0.10 | 7  |
| 22 C49F5.1;C56G3.2 | ISPALLEK                | 15  | 2740   | 1.54 | 0.11 | 7  |
| 22 C49F5.1;C56G3.2 | INAEHLK                 | 30  | 18505  | 1.67 | 0.12 | 7  |
| 22 C49F5.1;C56G3.2 | INAEHLK                 | 35  | 15389  | 1.75 | 0.20 | 12 |
| 22 C49F5.1;C56G3.2 | LRETILADVIK             | 15  | 1345   | 1.91 | 0.13 | 7  |
| 22 C49F5.1;C56G3.2 | FLFTSESVSEGHDPK         | 88  | 9585   | 2.27 | 0.10 | 5  |
| 22 C49F5.1;C56G3.2 | FLFTSESVSEGHDPK         | 79  | 8120   | 2.48 | 0.14 | 6  |
| 22 C49F5.1;C56G3.2 | VDRSAAYAARWVATSLVK      | 18  | 3919   | 2.89 | 0.18 | 6  |
| 22 C49F5.1;C56G3.2 | MCDQISDAVLDAHLK         | 53  | 6944   | 8.37 | 0.32 | 4  |
| 7 C49H3.11         | LGRLVK                  | 25  | 3513   | 0.40 | 0.16 | 39 |
| 1 C49H3.11         | EVATAIRGAIVAAK          | 17  | 1426   | 0.43 | 0.16 | 37 |
| 1 C49H3.11         | LGRLVK                  | 18  | 10550  | 0.43 | 0.08 | 19 |
| 22 C49H3.11        | LGRLVK                  | 16  | 6139   | 0.48 | 0.15 | 31 |
| 1 C49H3.11         | LGRLVK                  | 14  | 5567   | 0.49 | 0.16 | 34 |
| 10 C49H3.11        | IGLPHTVPCK              | 25  | 15482  | 0.51 | 0.17 | 34 |
| 22 C49H3.11        | ETEWTPVTK               | 13  | 8068   | 0.51 | 0.10 | 20 |
| 7 C49H3.11         | LGRLVK                  | 19  | 2653   | 0.52 | 0.13 | 25 |
| 10 C49H3.11        | LGRLVK                  | 19  | 61302  | 0.52 | 0.06 | 11 |
| 10 C49H3.11        | IGLPHTVPCK              | 27  | 20835  | 0.53 | 0.11 | 21 |
| 10 C49H3.11        | ITTLEEIYLNLSPIK         | 44  | 1115   | 0.57 | 0.18 | 32 |
| 22 C49H3.11        | LGRLVK                  | 19  | 45630  | 0.58 | 0.06 | 10 |

|                      |                   |    |       |      |      |    |
|----------------------|-------------------|----|-------|------|------|----|
| 1 C49H3.11           | LGRLVK            | 20 | 59003 | 0.60 | 0.06 | 9  |
| 1 C49H3.11           | AFVAIGDHAGHVGLGVK | 11 | 6796  | 0.60 | 0.18 | 30 |
| 10 C49H3.11          | EVATAIRGAIVAAK    | 38 | 2207  | 0.65 | 0.16 | 24 |
| 10 C49H3.11          | EVATAIRGAIVAAK    | 44 | 2122  | 0.65 | 0.11 | 17 |
| 10 C49H3.11          | AFVAIGDHAGHVGLGVK | 13 | 11598 | 0.70 | 0.38 | 55 |
| 1 C49H3.11           | IGLPHTVPCK        | 12 | 8437  | 0.72 | 0.12 | 17 |
| 1 C49H3.11           | EVATAIRGAIVAAK    | 59 | 7892  | 0.73 | 0.15 | 21 |
| 1 C49H3.11           | LLHMAGIEDCYTAAK   | 36 | 1705  | 0.74 | 0.14 | 19 |
| 1 C49H3.11           | LLHMAGIEDCYTAAK   | 51 | 2112  | 0.74 | 0.09 | 12 |
| 10 C49H3.11          | AFVAIGDHAGHVGLGVK | 13 | 7733  | 0.75 | 0.21 | 28 |
| 1 C49H3.11           | IGLPHTVPCK        | 15 | 5700  | 0.75 | 0.18 | 23 |
| 10 C49H3.11          | LLHMAGIEDCYTAAK   | 22 | 2786  | 0.75 | 0.09 | 11 |
| 10 C49H3.11          | EVATAIRGAIVAAK    | 40 | 1987  | 0.78 | 0.10 | 12 |
| 7 C49H3.11           | AFVAIGDHAGHVGLGVK | 15 | 8347  | 0.80 | 0.16 | 19 |
| 22 C49H3.11          | AFVAIGDHAGHVGLGVK | 25 | 15691 | 0.81 | 0.30 | 37 |
| 22 C49H3.11          | IGLPHTVPCK        | 19 | 21914 | 0.81 | 0.13 | 16 |
| 10 C49H3.11          | AFVAIGDHAGHVGLGVK | 65 | 2527  | 0.82 | 0.16 | 20 |
| 1 C49H3.11           | IGLPHTVPCK        | 13 | 8094  | 0.84 | 0.15 | 18 |
| 22 C49H3.11          | AFVAIGDHAGHVGLGVK | 14 | 8774  | 0.85 | 0.27 | 31 |
| 1 C49H3.11           | GSTATLGNFAK       | 64 | 38873 | 0.86 | 0.07 | 8  |
| 10 C49H3.11          | ITTLEEIYLNLSPIK   | 68 | 1123  | 0.88 | 0.13 | 14 |
| 10 C49H3.11          | LLHMAGIEDCYTAAK   | 23 | 3655  | 0.88 | 0.12 | 13 |
| 1 C49H3.11           | EVATAIRGAIVAAK    | 47 | 2199  | 0.89 | 0.21 | 23 |
| 22 C49H3.11          | AFVAIGDHAGHVGLGVK | 12 | 8395  | 0.90 | 0.12 | 13 |
| 22 C49H3.11          | EVATAIRGAIVAAK    | 46 | 3768  | 0.91 | 0.19 | 21 |
| 22 C49H3.11          | IGLPHTVPCK        | 29 | 9365  | 0.92 | 0.13 | 14 |
| 22 C49H3.11          | AFVAIGDHAGHVGLGVK | 20 | 12378 | 0.93 | 0.32 | 34 |
| 7 C49H3.11           | AFVAIGDHAGHVGLGVK | 20 | 8784  | 0.96 | 0.12 | 13 |
| 1 C49H3.11           | IGLPHTVPCK        | 14 | 12596 | 0.97 | 0.15 | 16 |
| 10 C49H3.11          | GSTATLGNFAK       | 59 | 29646 | 0.98 | 0.10 | 11 |
| 22 C49H3.11          | IGLPHTVPCK        | 20 | 6941  | 0.99 | 0.05 | 5  |
| 7 C49H3.11           | AFVAIGDHAGHVGLGVK | 15 | 8475  | 1.00 | 0.13 | 13 |
| 22 C49H3.11          | IGLPHTVPCK        | 20 | 15554 | 1.01 | 0.12 | 12 |
| 7 C49H3.11           | AFVAIGDHAGHVGLGVK | 28 | 11397 | 1.05 | 0.12 | 11 |
| 1 C49H3.11           | AFVAIGDHAGHVGLGVK | 19 | 11797 | 1.06 | 0.14 | 13 |
| 22 C49H3.11          | AFVAIGDHAGHVGLGVK | 22 | 15774 | 1.07 | 0.23 | 21 |
| 1 C49H3.11           | LLHMAGIEDCYTAAK   | 21 | 1291  | 1.09 | 0.14 | 13 |
| 7 C49H3.11           | IGLPHTVPCK        | 32 | 15636 | 1.12 | 0.12 | 11 |
| 1 C49H3.11           | EVATAIRGAIVAAK    | 22 | 2409  | 1.12 | 0.10 | 9  |
| 22 C49H3.11          | EVATAIRGAIVAAK    | 55 | 6412  | 1.12 | 0.17 | 15 |
| 22 C49H3.11          | EVATAIRGAIVAAK    | 25 | 1656  | 1.13 | 0.28 | 24 |
| 10 C49H3.11          | AFVAIGDHAGHVGLGVK | 97 | 2065  | 1.15 | 0.38 | 33 |
| 7 C49H3.11           | IGLPHTVPCK        | 27 | 11392 | 1.15 | 0.06 | 5  |
| 10 C49H3.11          | IGLPHTVPCK        | 16 | 12846 | 1.16 | 0.20 | 17 |
| 10 C49H3.11          | GSTATLGNFAK       | 74 | 35379 | 1.16 | 0.07 | 6  |
| 7 C49H3.11           | EVATAIRGAIVAAK    | 36 | 2243  | 1.16 | 0.23 | 19 |
| 10 C49H3.11          | EVATAIRGAIVAAK    | 14 | 1581  | 1.16 | 0.09 | 8  |
| 7 C49H3.11           | EVATAIRGAIVAAK    | 64 | 5269  | 1.19 | 0.14 | 12 |
| 10 C49H3.11          | EVATAIRGAIVAAK    | 35 | 1964  | 1.20 | 0.13 | 11 |
| 22 C49H3.11          | EVATAIRGAIVAAK    | 18 | 1734  | 1.23 | 0.29 | 23 |
| 1 C49H3.11           | EVATAIRGAIVAAK    | 50 | 3856  | 1.24 | 0.13 | 11 |
| 10 C49H3.11          | EVATAIRGAIVAAK    | 22 | 1716  | 1.26 | 0.21 | 17 |
| 7 C49H3.11           | EVATAIRGAIVAAK    | 63 | 3807  | 1.29 | 0.13 | 10 |
| 1 C49H3.11           | IGLPHTVPCK        | 12 | 10736 | 1.30 | 0.16 | 13 |
| 22 C49H3.11          | GSTATLGNFAK       | 17 | 3145  | 1.31 | 0.09 | 7  |
| 10 C49H3.11          | EVATAIRGAIVAAK    | 14 | 4031  | 1.45 | 0.11 | 8  |
| 7 C49H3.11           | IGLPHTVPCK        | 14 | 8718  | 1.48 | 0.16 | 11 |
| 7 C49H3.11           | EVATAIRGAIVAAK    | 47 | 5490  | 1.52 | 0.09 | 6  |
| 10 C49H3.11          | LGRLVK            | 11 | 4483  | 1.54 | 0.06 | 4  |
| 22 C49H3.11          | EVATAIRGAIVAAK    | 22 | 1806  | 1.54 | 0.13 | 9  |
| 22 C49H3.11          | GSTATLGNFAK       | 85 | 62644 | 1.57 | 0.05 | 3  |
| 22 C49H3.11          | GSTATLGNFAK       | 79 | 63515 | 1.58 | 0.04 | 3  |
| 1 C49H3.11           | GSTATLGNFAK       | 45 | 6489  | 1.59 | 0.06 | 4  |
| 22 C49H3.11          | EVATAIRGAIVAAK    | 31 | 2277  | 1.63 | 0.11 | 7  |
| 7 C49H3.11           | GSTATLGNFAK       | 25 | 2550  | 1.65 | 0.02 | 1  |
| 10 C49H3.11          | EVATAIRGAIVAAK    | 43 | 5942  | 1.68 | 0.21 | 12 |
| 1 C49H3.11           | LLHMAGIEDCYTAAK   | 14 | 1202  | 1.68 | 0.08 | 5  |
| 7 C49H3.11           | GSTATLGNFAK       | 42 | 12775 | 1.69 | 0.08 | 5  |
| 22 C49H3.11          | GSTATLGNFAK       | 17 | 2847  | 1.72 | 0.13 | 8  |
| 10 C49H3.11          | AFVAIGDHAGHVGLGVK | 16 | 24302 | 1.85 | 0.20 | 11 |
| 10 C49H3.11          | LGRLVK            | 10 | 756   | 1.91 | 0.29 | 15 |
| 10 C49H3.11          | GSTATLGNFAK       | 59 | 11712 | 2.06 | 0.09 | 4  |
| 10 C49H3.11          | LGRLVK            | 11 | 3453  | 2.14 | 0.07 | 3  |
| 22 C49H3.11          | GSTATLGNFAK       | 26 | 5168  | 2.53 | 0.06 | 2  |
| 22 C50B6.2           | ELEGAAAMLAK       | 53 | 3800  | 0.29 | 0.09 | 30 |
| 22 C50B6.2           | LEDRLANALTDVPK    | 31 | 1499  | 0.37 | 0.34 | 92 |
| 22 C50B6.2           | ELEGAAAMLAK       | 48 | 3826  | 0.40 | 0.15 | 37 |
| 22 C50B6.2           | AASLAAESTVDGEAIK  | 48 | 1426  | 0.43 | 0.20 | 47 |
| 22 C50B6.2           | ELEGAAAMLAK       | 46 | 3139  | 0.49 | 0.20 | 41 |
| 22 C50B6.2           | ELEGAAAMLAK       | 30 | 2905  | 0.49 | 0.28 | 56 |
| 1 C50B6.2            | ELEGAAAMLAK       | 46 | 1421  | 0.53 | 0.14 | 27 |
| 22 C50B6.2           | LEDRLANALTDVPK    | 29 | 1263  | 0.74 | 0.43 | 58 |
| 1 C50B6.2            | AASLAAESTVDGEAIK  | 38 | 743   | 0.96 | 0.21 | 22 |
| 10 C50B6.2           | AASLAAESTVDGEAIK  | 17 | 1173  | 1.02 | 0.11 | 11 |
| 22 C50B6.2           | AASLAAESTVDGEAIK  | 30 | 1506  | 1.03 | 0.31 | 30 |
| 10 C50B6.2           | AASLAAESTVDGEAIK  | 25 | 955   | 1.07 | 0.12 | 11 |
| 10 C50B6.2           | LEDRLANALTDVPK    | 12 | 1304  | 1.34 | 0.28 | 21 |
| 1 C50B6.2            | AASLAAESTVDGEAIK  | 42 | 797   | 1.36 | 0.14 | 10 |
| 10 C50B6.2           | ELEGAAAMLAK       | 46 | 2154  | 1.63 | 0.10 | 6  |
| 22 C50F2.6a;C50F2.6b | EIGSNFNK          | 29 | 5624  | 0.57 | 0.19 | 32 |
| 22 C50F2.6a;C50F2.6b | IIRPIK            | 15 | 8547  | 0.67 | 0.08 | 12 |
| 22 C50F2.6a;C50F2.6b | WTTDEGIVIEQTHK    | 89 | 5597  | 0.76 | 0.17 | 22 |
| 22 C50F2.6a;C50F2.6b | LNNNEVIK          | 50 | 8465  | 0.76 | 0.13 | 18 |
| 22 C50F2.6a;C50F2.6b | LNNNEVIK          | 33 | 6692  | 0.78 | 0.15 | 19 |
| 1 C50F2.6a;C50F2.6b  | SQDGDVLDQWYK      | 35 | 1627  | 0.79 | 0.28 | 35 |
| 7 C50F2.6a;C50F2.6b  | VVIPGNLGF GDK     | 10 | 1366  | 0.82 | 0.28 | 35 |
| 22 C50F2.6a;C50F2.6b | SQDGDVLDQWYK      | 63 | 3965  | 0.87 | 0.11 | 12 |
| 1 C50F2.6a;C50F2.6b  | SQDGDVLDQWYK      | 51 | 2620  | 0.90 | 0.22 | 24 |
| 1 C50F2.6a;C50F2.6b  | SQDGDVLDQWYK      | 48 | 1647  | 0.95 | 0.16 | 16 |
| 22 C50F2.6a;C50F2.6b | SQDGDVLDQWYK      | 87 | 3378  | 0.98 | 0.12 | 13 |
| 1 C50F2.6a;C50F2.6b  | WTTDEGIVIEQTHK    | 68 | 4126  | 0.98 | 0.10 | 10 |

|                                                                |                      |    |       |        |      |     |
|----------------------------------------------------------------|----------------------|----|-------|--------|------|-----|
| 1 C50F2.6a;C50F2.6b                                            | WTTDEGIVIEQTHK       | 72 | 4198  | 1.01   | 0.10 | 10  |
| 22 C50F2.6a;C50F2.6b                                           | KPYTFTLGK            | 38 | 37226 | 1.22   | 0.08 | 7   |
| 7 C50F2.6a;C50F2.6b                                            | WTTDEGIVIEQTHK       | 81 | 4189  | 1.22   | 0.17 | 14  |
| 7 C50F2.6a;C50F2.6b                                            | SQDGDVLDQWYK         | 35 | 2165  | 1.26   | 0.08 | 7   |
| 1 C50F2.6a;C50F2.6b                                            | SQDGDVLDQWYK         | 11 | 907   | 1.31   | 0.21 | 16  |
| 7 C50F2.6a;C50F2.6b                                            | SQDGDVLDQWYK         | 54 | 2675  | 1.41   | 0.09 | 7   |
| 22 C50F2.6a;C50F2.6b                                           | VVIPGNLGF GDK        | 16 | 1718  | 1.63   | 0.27 | 16  |
| 10 C50F2.6b;C50F2.6a                                           | SQDGDVLDQWYK         | 23 | 1278  | 0.75   | 0.24 | 32  |
| 10 C50F7.10                                                    | NFQLATATAAYQIEGAK    | 84 | 1763  | 0.86   | 0.10 | 11  |
| 10 C50F7.10                                                    | FISGHLEAVAK          | 12 | 928   | 1.05   | 0.17 | 16  |
| 22 C50F7.10                                                    | FISGHLEAVAK          | 34 | 3795  | 1.05   | 0.17 | 16  |
| 10 C50F7.10                                                    | NFQLATATAAYQIEGAK    | 83 | 1422  | 1.10   | 0.17 | 16  |
| 10 C50F7.10                                                    | FISGHLEAVAK          | 31 | 2833  | 1.14   | 0.05 | 4   |
| 10 C50F7.10                                                    | FISGHLEAVAK          | 64 | 2264  | 1.30   | 0.10 | 7   |
| 22 C50F7.4                                                     | LIGVAAQEIK           | 69 | 8996  | 0.24   | 0.14 | 59  |
| 22 C50F7.4                                                     | LIGVAAQEIK           | 87 | 11094 | 0.29   | 0.08 | 27  |
| 22 C50F7.4                                                     | LIGVAAQEIK           | 60 | 4131  | 0.41   | 0.17 | 42  |
| 7 C50F7.4                                                      | WMSFGDHEYVVK         | 34 | 921   | 0.42   | 0.18 | 43  |
| 22 C50F7.4                                                     | WMSFGDHEYVVK         | 57 | 5867  | 0.46   | 0.14 | 29  |
| 22 C50F7.4                                                     | LIGVAAQEIK           | 52 | 3419  | 0.50   | 0.17 | 34  |
| 22 C50F7.4                                                     | DAALEAIDEMIGK        | 45 | 1058  | 0.57   | 0.29 | 50  |
| 7 C50F7.4                                                      | ILTANNLDEAAAK        | 43 | 2370  | 0.60   | 0.16 | 26  |
| 7 C50F7.4                                                      | ILTANNLDEAAAK        | 44 | 2177  | 0.61   | 0.20 | 33  |
| 1 C50F7.4                                                      | LIGVAAQEIK           | 45 | 2070  | 0.64   | 0.07 | 12  |
| 7 C50F7.4                                                      | WMSFGDHEYVVK         | 22 | 939   | 0.65   | 0.15 | 23  |
| 7 C50F7.4                                                      | AQILAGGRGK           | 16 | 1413  | 0.65   | 0.16 | 25  |
| 1 C50F7.4                                                      | LIGVAAQEIK           | 48 | 2498  | 0.70   | 0.13 | 18  |
| 22 C50F7.4                                                     | LIGVAAQEIK           | 32 | 2905  | 0.71   | 0.16 | 23  |
| 22 C50F7.4                                                     | MNFDDSAAYRQK         | 46 | 4723  | 0.76   | 0.23 | 30  |
| 22 C50F7.4                                                     | LIGVAAQEIK           | 34 | 1335  | 0.79   | 0.21 | 27  |
| 22 C50F7.4                                                     | LIGVAAQEIK           | 25 | 1037  | 0.85   | 0.18 | 21  |
| 22 C50F7.4                                                     | VMIAEGVDIK           | 71 | 5236  | 0.88   | 0.10 | 11  |
| 22 C50F7.4                                                     | WMSFGDHEYVVK         | 52 | 4318  | 0.94   | 0.11 | 12  |
| 22 C50F7.4                                                     | QTTSEGVVRVDK         | 24 | 4708  | 0.95   | 0.21 | 22  |
| 22 C50F7.4                                                     | WMSFGDHEYVVK         | 30 | 2585  | 0.99   | 0.14 | 14  |
| 22 C50F7.4                                                     | DAALEAIDEMIGK        | 55 | 1236  | 1.02   | 0.13 | 13  |
| 22 C50F7.4                                                     | HGCSVQNFVVASNRK      | 12 | 11134 | 1.05   | 0.09 | 9   |
| 22 C50F7.4                                                     | IGLNVPMVVRLEGTNVDAAK | 10 | 1280  | 1.14   | 0.16 | 14  |
| 7 C50F7.4                                                      | TPERIFK              | 15 | 938   | 1.24   | 0.08 | 7   |
| 22 C50F7.4                                                     | LIGVAAQEIK           | 40 | 2346  | 1.28   | 0.14 | 11  |
| 22 C50F7.4                                                     | LIGVAAQEIK           | 41 | 5264  | 1.47   | 0.11 | 7   |
| 7 C50F7.4                                                      | AQILAGGRGK           | 10 | 2501  | 1.48   | 0.17 | 11  |
| 22 C50F7.4                                                     | LIGVAAQEIK           | 42 | 4189  | 1.66   | 0.11 | 7   |
| 1 C50F7.4                                                      | AQILAGGRGK           | 13 | 663   | 3.03   | 0.24 | 8   |
| 22 C51E3.9                                                     | DGGQIVLFSRPK         | 33 | 4385  | 0.52   | 0.19 | 37  |
| 22 C51E3.9                                                     | DGGQIVLFSRPK         | 36 | 4389  | 0.53   | 0.12 | 22  |
| 10 C51E3.9                                                     | DGGQIVLFSRPK         | 27 | 4365  | 0.59   | 0.12 | 21  |
| 22 C52A11.4a;C52A11.4d;C52A11.4f;C52A11.4c;C52A11.4e;C52A11.4b | GALPLGAVLDGDK        | 14 | 6092  | 0.49   | 1.00 | 203 |
| 7 C52A11.4a;C52A11.4d;C52A11.4f;C52A11.4c;C52A11.4e;C52A11.4b  | GALPLGAVLDGDK        | 10 | 8353  | 0.67   | 0.60 | 89  |
| 7 C52A11.4a;C52A11.4d;C52A11.4f;C52A11.4c;C52A11.4e;C52A11.4b  | GALPLGAVLDGDK        | 19 | 2414  | 1.35   | 0.57 | 42  |
| 1 C52A11.4a;C52A11.4d;C52A11.4f;C52A11.4c;C52A11.4e;C52A11.4b  | GALPLGAVLDGDK        | 15 | 1681  | 1.71   | 0.60 | 35  |
| 7 C52A11.4a;C52A11.4d;C52A11.4f;C52A11.4c;C52A11.4e;C52A11.4b  | GALPLGAVLDGDK        | 15 | 2862  | 2.27   | 0.55 | 24  |
| 7 C52A11.4a;C52A11.4d;C52A11.4f;C52A11.4c;C52A11.4e;C52A11.4b  | GALPLGAVLDGDK        | 13 | 12395 | 2.27   | 0.88 | 39  |
| 22 C52A11.4a;C52A11.4d;C52A11.4f;C52A11.4c;C52A11.4e;C52A11.4b | GALPLGAVLDGDK        | 19 | 26073 | 118.79 | 0.38 | 0   |
| 22 C52E4.1                                                     | HFGVSAYAVPK          | 55 | 4780  | 0.64   | 0.28 | 43  |
| 22 C52E4.1                                                     | HFGVSAYAVPK          | 64 | 3513  | 1.04   | 0.09 | 9   |
| 22 C52E4.1                                                     | HFGVSAYAVPK          | 28 | 2471  | 1.13   | 0.17 | 15  |
| 10 C52E4.1                                                     | HFGVSAYAVPK          | 54 | 3508  | 1.39   | 0.07 | 5   |
| 10 C52E4.1                                                     | HFGVSAYAVPK          | 32 | 2927  | 1.64   | 0.11 | 7   |
| 10 C52E4.1                                                     | HFGVSAYAVPK          | 45 | 6714  | 1.69   | 0.10 | 6   |
| 22 C52E4.1                                                     | HFGVSAYAVPK          | 55 | 4501  | 1.70   | 0.08 | 5   |
| 1 C52E4.1                                                      | HFGVSAYAVPK          | 28 | 1232  | 1.71   | 0.12 | 7   |
| 1 C52E4.1                                                      | HFGVSAYAVPK          | 20 | 1330  | 2.09   | 0.37 | 18  |
| 10 C52E4.1                                                     | HFGVSAYAVPK          | 55 | 11636 | 2.18   | 0.07 | 3   |
| 10 C52E4.4                                                     | YQIHLPLPAK           | 13 | 1824  | 0.78   | 0.08 | 10  |
| 22 C52E4.4                                                     | YQIHLPLPAK           | 19 | 1994  | 0.83   | 0.23 | 28  |
| 10 C52E4.4                                                     | NFQALDEGDI AVLK      | 41 | 1078  | 1.09   | 0.19 | 18  |
| 10 C52E4.4                                                     | NFQALDEGDI AVLK      | 42 | 1028  | 1.17   | 0.20 | 17  |
| 10 C52E4.4                                                     | YQIHLPLPAK           | 51 | 2654  | 1.69   | 0.15 | 9   |
| 10 C52E4.4                                                     | YQIHLPLPAK           | 16 | 1823  | 1.91   | 0.14 | 7   |
| 10 C52E4.4                                                     | YQIHLPLPAK           | 12 | 688   | 2.72   | 0.21 | 8   |
| 7 C53D5.6                                                      | LQSADN DIRK          | 21 | 1667  | 0.26   | 0.10 | 37  |
| 10 C53D5.6                                                     | TVGIRTSGLEEK         | 19 | 2738  | 0.33   | 0.37 | 112 |
| 22 C53D5.6                                                     | VMLPVFLPLVEK         | 20 | 1394  | 0.37   | 0.11 | 31  |
| 10 C53D5.6                                                     | VMLPVFLPLVEK         | 22 | 1268  | 0.43   | 0.06 | 13  |
| 22 C53D5.6                                                     | QRIVTILK             | 12 | 5205  | 0.44   | 0.15 | 34  |
| 22 C53D5.6                                                     | VMLPVFLPLVEK         | 25 | 1368  | 0.54   | 0.09 | 16  |
| 7 C53D5.6                                                      | VMLPVFLPLVEK         | 18 | 1506  | 0.59   | 0.15 | 25  |
| 7 C53D5.6                                                      | VMLPVFLPLVEK         | 32 | 1120  | 0.66   | 0.17 | 26  |
| 10 C53D5.6                                                     | IIGNVPLPAEAYGK       | 20 | 1881  | 0.83   | 0.21 | 25  |
| 10 C53D5.6                                                     | LQSADN DIRK          | 17 | 2147  | 0.84   | 0.09 | 11  |
| 1 C53D5.6                                                      | TVGIRTSGLEEK         | 11 | 1083  | 0.85   | 0.13 | 16  |
| 10 C53D5.6                                                     | LQSADN DIRK          | 20 | 2342  | 0.95   | 0.09 | 9   |
| 22 C53D5.6                                                     | VMLPVFLPLVEK         | 19 | 1693  | 0.96   | 0.12 | 12  |
| 10 C53D5.6                                                     | TVGIRTSGLEEK         | 29 | 3862  | 1.04   | 0.24 | 23  |
| 10 C53D5.6                                                     | TVGIRTSGLEEK         | 19 | 3834  | 1.10   | 0.14 | 12  |
| 10 C53D5.6                                                     | IIGNVPLPAEAYGK       | 17 | 2542  | 1.11   | 0.17 | 16  |
| 10 C53D5.6                                                     | VMLPVFLPLVEK         | 33 | 1185  | 1.14   | 0.26 | 23  |
| 22 C53D5.6                                                     | VMLPVFLPLVEK         | 26 | 1212  | 1.17   | 0.07 | 6   |
| 1 C53D5.6                                                      | LQSADN DIRK          | 18 | 1006  | 1.18   | 0.17 | 14  |
| 10 C53D5.6                                                     | VMLPVFLPLVEK         | 19 | 1343  | 1.20   | 0.13 | 11  |
| 10 C53D5.6                                                     | IIGNVPLPAEAYGK       | 18 | 2623  | 1.47   | 0.20 | 14  |
| 10 C53D5.6                                                     | QRIVTILK             | 24 | 3494  | 1.51   | 0.24 | 16  |
| 22 C53D5.6                                                     | QRIVTILK             | 15 | 545   | 1.61   | 0.40 | 25  |
| 22 C53D5.6                                                     | TVGIRTSGLEEK         | 17 | 2761  | 1.62   | 0.11 | 7   |
| 1 C53D5.6                                                      | QRIVTILK             | 11 | 2355  | 1.64   | 0.28 | 17  |
| 22 C53D5.6                                                     | TVGIRTSGLEEK         | 21 | 2079  | 1.92   | 0.21 | 11  |
| 10 C53D5.6                                                     | IIGNVPLPAEAYGK       | 18 | 1663  | 1.98   | 0.22 | 11  |
| 22 C53D5.6                                                     | QRIVTILK             | 13 | 11817 | 2.08   | 0.11 | 5   |
| 22 C53D5.6                                                     | QRIVTILK             | 11 | 7106  | 2.32   | 0.25 | 11  |
| 7 C53D5.6                                                      | TVGIRTSGLEEK         | 12 | 1345  | 3.30   | 0.16 | 5   |

|                      |                       |    |       |      |      |     |
|----------------------|-----------------------|----|-------|------|------|-----|
| 22 C53D5.6           | LQSADNDIRK            | 28 | 1569  | 5.17 | 0.18 | 3   |
| 1 C54D1.5            | QFVIDYRK              | 10 | 545   | 0.83 | 0.20 | 24  |
| 10 C54D1.5           | QFVIDYRK              | 15 | 1027  | 1.16 | 0.13 | 11  |
| 7 C54D1.5            | QFVIDYRK              | 15 | 1500  | 1.21 | 0.07 | 6   |
| 22 C54E4.2a;C54E4.2b | DVHAQESGADHTLK        | 30 | 1494  | 0.77 | 0.14 | 18  |
| 22 C55B7.4a          | RDGDHFLISGTK          | 15 | 9163  | 0.73 | 0.15 | 21  |
| 22 C55B7.4a          | RDGDHFLISGTK          | 27 | 10173 | 0.77 | 0.12 | 16  |
| 22 C55B7.4a          | WLGGVGFTK             | 33 | 2840  | 0.83 | 0.13 | 16  |
| 10 C55B7.4a;C55B7.4b | WLGGVGFTK             | 31 | 3089  | 1.60 | 0.10 | 6   |
| 10 C55B7.4a;C55B7.4b | WLGGVGFTK             | 32 | 2539  | 1.66 | 0.19 | 11  |
| 10 C55B7.4a;C55B7.4b | RDGDHFLISGTK          | 14 | 9987  | 1.93 | 0.08 | 4   |
| 10 C55B7.4a;C55B7.4b | RDGDHFLISGTK          | 20 | 5884  | 2.36 | 0.10 | 4   |
| 22 C55F2.1b          | SLAISVSDK             | 30 | 4299  | 0.83 | 0.13 | 15  |
| 22 C55F2.1b          | SLAISVSDK             | 43 | 3819  | 0.86 | 0.14 | 16  |
| 10 C55F2.1b          | SLAISVSDK             | 22 | 5216  | 0.89 | 0.09 | 11  |
| 10 C55F2.1b          | SLAISVSDK             | 11 | 1624  | 2.14 | 0.23 | 11  |
| 22 C55H1.2           | AAVILFLNK             | 18 | 17396 | 1.28 | 1.08 | 84  |
| 10 C56A3.5           | VLDQLLFVNK            | 13 | 680   | 0.60 | 0.31 | 52  |
| 10 C56A3.5           | TAIESVARTLK           | 19 | 1563  | 0.68 | 0.33 | 49  |
| 22 C56A3.5           | DVQLHQFATK            | 27 | 2447  | 0.71 | 0.24 | 33  |
| 10 C56A3.5           | TAIESVARTLK           | 35 | 1903  | 0.87 | 0.20 | 23  |
| 7 C56A3.5            | VLDQLLFVNK            | 18 | 544   | 1.29 | 0.20 | 15  |
| 22 C56A3.5           | VLDQLLFVNK            | 25 | 644   | 1.37 | 0.15 | 11  |
| 7 C56A3.5            | VLDQLLFVNK            | 15 | 376   | 1.45 | 0.20 | 14  |
| 22 C56C10.8          | DDGTVIHFNNPK          | 52 | 8462  | 0.07 | 0.32 | 461 |
| 22 C56C10.8          | DDGTVIHFNNPK          | 45 | 12111 | 0.09 | 0.20 | 227 |
| 22 C56C10.8          | DDGTVIHFNNPK          | 46 | 8461  | 0.15 | 0.42 | 276 |
| 22 C56C10.8          | DDGTVIHFNNPK          | 60 | 10215 | 0.15 | 0.21 | 138 |
| 22 C56C10.8          | LSVTNIPGIEEVNMIK      | 34 | 1895  | 0.19 | 0.51 | 273 |
| 10 C56C10.8          | DDGTVIHFNNPK          | 56 | 9229  | 0.24 | 0.15 | 62  |
| 10 C56C10.8          | DDGTVIHFNNPK          | 55 | 10736 | 0.38 | 0.27 | 73  |
| 7 C56C10.8           | DDGTVIHFNNPK          | 31 | 5254  | 0.62 | 0.09 | 14  |
| 7 C56C10.8           | VQTSVPANTFSVTGSADNK   | 52 | 1744  | 0.62 | 0.29 | 47  |
| 7 C56C10.8           | DDGTVIHFNNPK          | 32 | 4243  | 0.71 | 0.06 | 8   |
| 22 C56C10.8          | LSVTNIPGIEEVNMIK      | 24 | 1152  | 0.81 | 0.46 | 57  |
| 7 C56C10.8           | LQAQQEHVRIGGK         | 17 | 5362  | 1.27 | 0.34 | 27  |
| 10 C56C10.8          | LQAQQEHVRIGGK         | 21 | 11044 | 1.92 | 0.34 | 18  |
| 10 C56C10.8          | LQAQQEHVRIGGK         | 20 | 16982 | 2.83 | 0.42 | 15  |
| 7 CD4.6              | LAESMQLK              | 31 | 2469  | 0.48 | 0.10 | 21  |
| 7 CD4.6              | LAESMQLK              | 40 | 2561  | 0.60 | 0.34 | 56  |
| 22 CD4.6             | LAESMQLK              | 38 | 3702  | 0.64 | 0.08 | 12  |
| 22 CD4.6             | LAESMQLK              | 35 | 4059  | 0.66 | 0.24 | 36  |
| 10 CD4.6             | SETHAVIVALK           | 17 | 11611 | 0.86 | 0.12 | 14  |
| 22 CD4.6             | QGSATVGIK             | 24 | 3900  | 1.01 | 0.31 | 30  |
| 10 CD4.6             | LAESMQLK              | 23 | 2449  | 1.29 | 0.18 | 14  |
| 22 CD4.6             | SETHAVIVALK           | 39 | 9420  | 1.34 | 0.14 | 10  |
| 10 CD4.6             | QGSATVGIK             | 36 | 5366  | 1.45 | 0.24 | 17  |
| 22 CD4.6             | SETHAVIVALK           | 45 | 11010 | 1.50 | 0.09 | 6   |
| 22 CD4.6             | LAESMQLK              | 43 | 3176  | 1.67 | 0.06 | 3   |
| 22 CD4.6             | LAESMQLK              | 47 | 2379  | 1.76 | 0.11 | 6   |
| 7 CD4.6              | SETHAVIVALK           | 20 | 5968  | 1.82 | 0.10 | 6   |
| 22 CD4.6             | QGSATVGIK             | 11 | 2563  | 2.08 | 0.18 | 9   |
| 10 D1005.1           | VIAIIAEGVPENQTRK      | 27 | 844   | 0.28 | 0.07 | 26  |
| 7 D1005.1            | GVIKPDQLIK            | 31 | 1884  | 0.43 | 0.23 | 54  |
| 10 D1005.1           | VIAIIAEGVPENQTRK      | 23 | 1012  | 0.50 | 0.17 | 34  |
| 10 D1005.1           | LTILNRK               | 40 | 3809  | 0.53 | 0.24 | 46  |
| 10 D1005.1           | VIAIIAEGVPENQTRK      | 38 | 1945  | 0.53 | 0.18 | 34  |
| 10 D1005.1           | EILIPAYK              | 15 | 1549  | 0.60 | 0.17 | 28  |
| 10 D1005.1           | VIAIIAEGVPENQTRK      | 34 | 3826  | 0.60 | 0.15 | 25  |
| 10 D1005.1           | LTILNRK               | 41 | 4346  | 0.61 | 0.32 | 52  |
| 10 D1005.1           | VIAIIAEGVPENQTRK      | 23 | 4474  | 0.64 | 0.21 | 33  |
| 10 D1005.1           | EILIPAYK              | 28 | 2236  | 0.68 | 0.19 | 29  |
| 10 D1005.1           | AIIWGQQAK             | 13 | 7078  | 0.74 | 0.07 | 9   |
| 10 D1005.1           | AIIWGQQAK             | 12 | 7130  | 0.78 | 0.13 | 17  |
| 7 D1005.1            | VIAIIAEGVPENQTRK      | 47 | 5155  | 0.80 | 0.05 | 7   |
| 10 D1005.1           | EILIPAYK              | 44 | 4751  | 0.80 | 0.20 | 25  |
| 7 D1005.1            | LTILNRK               | 22 | 3016  | 0.80 | 0.52 | 64  |
| 10 D1005.1           | EILIPAYK              | 13 | 1245  | 0.85 | 0.10 | 12  |
| 7 D1005.1            | VIAIIAEGVPENQTRK      | 60 | 4976  | 0.85 | 0.16 | 19  |
| 10 D1005.1           | EILIPAYK              | 26 | 2515  | 0.87 | 0.09 | 10  |
| 10 D1005.1           | LTILNRK               | 22 | 1133  | 0.89 | 0.17 | 19  |
| 10 D1005.1           | VIAIIAEGVPENQTRK      | 41 | 1688  | 0.93 | 0.09 | 10  |
| 10 D1005.1           | LTILNRK               | 15 | 4734  | 0.95 | 0.22 | 23  |
| 10 D1005.1           | LTILNRK               | 12 | 3961  | 1.02 | 0.37 | 37  |
| 10 D1005.1           | EILIPAYK              | 28 | 4591  | 1.04 | 0.11 | 11  |
| 7 D1005.1            | VIAIIAEGVPENQTRK      | 50 | 4142  | 1.10 | 0.12 | 11  |
| 10 D1005.1           | EILIPAYK              | 25 | 2503  | 1.14 | 0.24 | 21  |
| 7 D1005.1            | VIAIIAEGVPENQTRK      | 67 | 3405  | 1.14 | 0.13 | 11  |
| 7 D1005.1            | LTILNRK               | 25 | 3427  | 1.15 | 0.56 | 49  |
| 10 D1005.1           | VIAIIAEGVPENQTRK      | 46 | 4769  | 1.17 | 0.08 | 7   |
| 10 D1005.1           | LTILNRK               | 22 | 1285  | 1.17 | 0.16 | 14  |
| 10 D1005.1           | VIAIIAEGVPENQTRK      | 66 | 4149  | 1.19 | 0.12 | 10  |
| 7 D1005.1            | GVIKPDQLIK            | 53 | 5049  | 1.20 | 0.18 | 15  |
| 10 D1005.1           | VIAIIAEGVPENQTRK      | 62 | 2652  | 1.23 | 0.18 | 14  |
| 10 D1005.1           | EILIPAYK              | 22 | 2232  | 1.25 | 0.09 | 7   |
| 7 D1005.1            | LTILNRK               | 18 | 1280  | 1.28 | 0.20 | 16  |
| 7 D1005.1            | EILIPAYK              | 14 | 2568  | 1.41 | 0.14 | 10  |
| 10 D1005.1           | VIAIIAEGVPENQTRK      | 54 | 4458  | 1.43 | 0.11 | 7   |
| 10 D1005.1           | VIAIIAEGVPENQTRK      | 15 | 1550  | 1.46 | 0.20 | 14  |
| 10 D1005.1           | VIAIIAEGVPENQTRK      | 53 | 2203  | 1.47 | 0.19 | 13  |
| 7 D1005.1            | EILIPAYK              | 21 | 3412  | 1.48 | 0.18 | 12  |
| 10 D1005.1           | NAALRASGALVPESFDDLGNK | 14 | 2559  | 1.53 | 0.12 | 8   |
| 10 D1005.1           | EILIPAYK              | 19 | 1733  | 1.56 | 0.29 | 19  |
| 7 D1005.1            | RVEILK                | 12 | 6081  | 1.59 | 0.08 | 5   |
| 10 D1005.1           | LTILNRK               | 23 | 4833  | 1.95 | 0.15 | 7   |
| 10 D1005.1           | EILIPAYK              | 17 | 1393  | 2.10 | 0.38 | 18  |
| 7 D1005.1            | LTILNRK               | 28 | 2814  | 2.13 | 0.23 | 11  |
| 10 D1005.1           | LTILNRK               | 25 | 817   | 2.14 | 0.33 | 15  |
| 10 D1005.1           | LTILNRK               | 39 | 5520  | 2.23 | 0.23 | 10  |
| 7 D1005.1            | LTILNRK               | 11 | 1200  | 2.57 | 0.07 | 3   |
| 7 D1005.1            | GVIKPDQLIK            | 14 | 1178  | 6.97 | 0.23 | 3   |

|            |                       |     |       |      |      |     |
|------------|-----------------------|-----|-------|------|------|-----|
| 1 D1007.12 | VQIFLSGK              | 12  | 430   | 0.67 | 0.10 | 14  |
| 1 D1007.12 | VQIFLSGK              | 16  | 427   | 0.71 | 0.10 | 14  |
| 22 D1025.3 | ENNILRTEYTEK          | 20  | 1765  | 0.15 | 0.84 | 565 |
| 7 D1053.1  | TVDLLSEEAk            | 37  | 1788  | 0.25 | 0.17 | 67  |
| 22 D1053.1 | EAGFGGQFAK            | 45  | 3426  | 0.73 | 0.18 | 24  |
| 10 D1054.2 | DGVVLATENVGSVLTDDQPK  | 91  | 1461  | 0.40 | 0.25 | 62  |
| 10 D1054.2 | DGVVLATENVGSVLTDDQPK  | 79  | 4754  | 0.41 | 0.14 | 35  |
| 10 D1054.2 | DGVVLATENVGSVLTDDQPK  | 125 | 1914  | 0.43 | 0.19 | 43  |
| 7 D1054.2  | LMQIEYALNAVK          | 44  | 850   | 0.46 | 0.20 | 45  |
| 22 D1054.2 | LMQIEYALNAVK          | 66  | 1338  | 0.47 | 0.22 | 47  |
| 22 D1054.2 | LMQIEYALNAVK          | 100 | 5120  | 0.54 | 0.10 | 18  |
| 10 D1054.2 | DGVVLATENVGSVLTDDQPK  | 89  | 3487  | 0.55 | 0.27 | 50  |
| 22 D1054.2 | LMQIEYALNAVK          | 92  | 5177  | 0.58 | 0.08 | 14  |
| 10 D1054.2 | LMQIEYALNAVK          | 52  | 1182  | 0.66 | 0.17 | 26  |
| 22 D1054.2 | DGVVLATENVGSVLTDDQPK  | 101 | 2539  | 0.67 | 0.21 | 31  |
| 7 D1054.2  | LMQIEYALNAVK          | 60  | 1064  | 0.76 | 0.13 | 17  |
| 1 D1054.2  | DGVVLATENVGSVLTDDQPK  | 48  | 1372  | 0.81 | 0.17 | 21  |
| 22 D1054.2 | DGVVLATENVGSVLTDDQPK  | 118 | 2772  | 0.91 | 0.15 | 17  |
| 1 D1054.2  | LMQIEYALNAVK          | 54  | 729   | 0.92 | 0.25 | 27  |
| 22 D1054.2 | DGVVLATENVGSVLTDDQPK  | 94  | 4839  | 1.02 | 0.17 | 17  |
| 7 D1054.2  | DGVVLATENVGSVLTDDQPK  | 50  | 2213  | 1.11 | 0.15 | 13  |
| 1 D1054.2  | DGVVLATENVGSVLTDDQPK  | 41  | 652   | 1.15 | 0.11 | 9   |
| 22 D1054.2 | DGVVLATENVGSVLTDDQPK  | 46  | 3179  | 1.21 | 0.11 | 9   |
| 7 D1054.2  | DGVVLATENVGSVLTDDQPK  | 26  | 1627  | 1.37 | 0.21 | 15  |
| 22 D1054.2 | NGQPSVGLRAK           | 11  | 6695  | 1.76 | 0.11 | 6   |
| 22 D1054.2 | LMQIEYALNAVK          | 73  | 1878  | 1.95 | 0.13 | 6   |
| 22 D1054.2 | LMQIEYALNAVK          | 69  | 2088  | 2.06 | 0.19 | 9   |
| 10 D1054.2 | DGVVLATENVGSVLTDDQPK  | 19  | 1128  | 2.22 | 0.28 | 13  |
| 10 D1054.2 | LMQIEYALNAVK          | 65  | 893   | 3.75 | 0.13 | 3   |
| 1 D1054.2  | LMQIEYALNAVK          | 38  | 551   | 4.12 | 0.16 | 4   |
| 7 D2013.9  | VYADDTQLTEHLK         | 32  | 1503  | 1.03 | 0.16 | 16  |
| 22 D2023.2 | TLAIQLLAEGK           | 51  | 1393  | 0.35 | 0.22 | 62  |
| 22 D2023.2 | TLAIQLLAEGK           | 49  | 1229  | 0.37 | 0.17 | 45  |
| 1 D2023.2  | AQAHILSIK             | 29  | 644   | 0.40 | 0.39 | 99  |
| 22 D2023.2 | TLAIQLLAEGK           | 61  | 1774  | 0.40 | 0.18 | 46  |
| 22 D2023.2 | YYLNLADQLVK           | 41  | 1130  | 0.51 | 0.17 | 34  |
| 10 D2023.2 | LLNYLGEVK             | 11  | 5335  | 0.59 | 0.25 | 42  |
| 22 D2023.2 | LLNYLGEVK             | 63  | 1862  | 0.85 | 0.21 | 24  |
| 22 D2023.2 | LLNYLGEVK             | 27  | 1184  | 0.86 | 0.29 | 33  |
| 22 D2023.2 | LLNYLGEVK             | 30  | 1325  | 0.91 | 0.24 | 27  |
| 22 D2023.2 | AQAHILSIK             | 39  | 4465  | 0.95 | 0.15 | 16  |
| 7 D2023.2  | TLAIQLLAEGK           | 48  | 1414  | 0.96 | 0.13 | 13  |
| 10 D2023.2 | LLNYLGEVK             | 42  | 1115  | 0.99 | 0.24 | 24  |
| 7 D2023.2  | TLAIQLLAEGK           | 83  | 1108  | 1.03 | 0.15 | 15  |
| 7 D2023.2  | TLAIQLLAEGK           | 82  | 1561  | 1.04 | 0.16 | 15  |
| 22 D2023.2 | AQAHILSIK             | 26  | 4776  | 1.07 | 0.19 | 18  |
| 10 D2023.2 | TLAIQLLAEGK           | 50  | 1232  | 1.16 | 0.20 | 17  |
| 1 D2023.2  | TLAIQLLAEGK           | 47  | 479   | 1.31 | 0.15 | 11  |
| 10 D2023.2 | LLNYLGEVK             | 29  | 903   | 1.39 | 0.13 | 9   |
| 7 D2023.2  | TLAIQLLAEGK           | 71  | 1192  | 1.43 | 0.13 | 9   |
| 7 D2023.2  | TLAIQLLAEGK           | 63  | 969   | 1.45 | 0.16 | 11  |
| 7 D2023.2  | TLAIQLLAEGK           | 42  | 1081  | 1.54 | 0.06 | 4   |
| 10 D2023.2 | AQAHILSIK             | 40  | 4504  | 1.61 | 0.13 | 8   |
| 10 D2023.2 | AQAHILSIK             | 37  | 3574  | 1.61 | 0.20 | 13  |
| 10 D2023.2 | VIASARNHPNAAAK        | 14  | 6754  | 1.76 | 0.13 | 7   |
| 10 D2023.2 | VIASARNHPNAAAK        | 20  | 7563  | 1.82 | 0.13 | 7   |
| 1 D2023.2  | AQAHILSIK             | 29  | 1848  | 2.25 | 0.11 | 5   |
| 1 D2023.2  | AQAHILSIK             | 26  | 2222  | 2.52 | 0.06 | 2   |
| 1 D2023.2  | TLAIQLLAEGK           | 42  | 1427  | 2.58 | 0.19 | 7   |
| 1 D2023.2  | TLAIQLLAEGK           | 57  | 1691  | 3.15 | 0.15 | 5   |
| 1 D2023.2  | LLNYLGEVK             | 20  | 572   | 3.60 | 0.28 | 8   |
| 10 D2023.5 | EHFIFYGK              | 27  | 7640  | 0.53 | 0.16 | 30  |
| 10 D2023.5 | EHFIFYGK              | 27  | 9488  | 0.61 | 0.08 | 13  |
| 22 D2023.5 | NLPSAELLVK            | 16  | 4259  | 0.71 | 0.11 | 16  |
| 22 D2023.5 | YVITFQLEAK            | 24  | 536   | 0.84 | 0.12 | 15  |
| 22 D2023.5 | NLPSAELLVK            | 16  | 3193  | 0.85 | 0.11 | 13  |
| 22 D2023.5 | NLPSAELLVK            | 19  | 7912  | 0.90 | 0.09 | 10  |
| 22 D2023.5 | YVITFQLEAK            | 39  | 1096  | 0.92 | 0.28 | 30  |
| 22 D2023.5 | NLPSAELLVK            | 19  | 8243  | 1.10 | 0.06 | 5   |
| 22 D2023.5 | GAFGGMLFASK           | 43  | 3590  | 1.26 | 0.09 | 7   |
| 10 D2023.5 | NLPSAELLVK            | 26  | 6184  | 1.33 | 0.13 | 10  |
| 22 D2023.5 | GAFGGMLFASK           | 69  | 4080  | 1.33 | 0.12 | 9   |
| 10 D2023.5 | GAFGGMLFASK           | 36  | 3135  | 1.60 | 0.12 | 8   |
| 10 D2023.5 | EHFIFYGK              | 10  | 3098  | 2.19 | 0.19 | 9   |
| 22 D2023.5 | EHFIFYGK              | 27  | 6872  | 2.25 | 0.09 | 4   |
| 22 D2045.6 | SAPAIVGLIK            | 17  | 2361  | 0.86 | 0.10 | 12  |
| 22 D2045.6 | SAPAIVGLIK            | 38  | 2206  | 1.02 | 0.09 | 9   |
| 7 D2045.6  | RAPPQAQLTK            | 11  | 868   | 1.36 | 0.15 | 11  |
| 10 D2045.6 | SAPAIVGLIK            | 27  | 1655  | 1.94 | 0.09 | 5   |
| 10 D2085.1 | ALLSTGFVVPK           | 15  | 680   | 0.75 | 0.16 | 21  |
| 10 D2085.1 | ALLSTGFVVPK           | 11  | 505   | 0.84 | 0.15 | 18  |
| 10 D2085.1 | ALLSTGFVVPK           | 24  | 551   | 0.93 | 0.24 | 25  |
| 22 D2085.1 | ALLSTGFVVPK           | 21  | 743   | 2.15 | 0.13 | 6   |
| 22 D2085.1 | ALLSTGFVVPK           | 13  | 500   | 3.18 | 0.29 | 9   |
| 22 D2096.8 | IEFHFATNPYFK          | 36  | 6449  | 0.40 | 0.11 | 28  |
| 22 D2096.8 | IEFHFATNPYFK          | 44  | 5878  | 0.44 | 0.13 | 30  |
| 10 D2096.8 | RVHELEIEFEGK          | 18  | 7926  | 0.85 | 0.08 | 10  |
| 22 D2096.8 | ADSFNFFFEPPK          | 42  | 4818  | 1.05 | 0.04 | 4   |
| 1 D2096.8  | RVHELEIEFEGK          | 18  | 11079 | 1.09 | 0.08 | 7   |
| 22 D2096.8 | ADSFNFFFEPPK          | 58  | 5082  | 1.10 | 0.07 | 6   |
| 10 D2096.8 | RVHELEIEFEGK          | 16  | 6572  | 1.11 | 0.17 | 15  |
| 22 D2096.8 | AIVAGEVEPTK           | 19  | 6730  | 1.13 | 0.18 | 16  |
| 22 D2096.8 | ADSFNFFFEPPK          | 16  | 774   | 1.17 | 0.09 | 8   |
| 10 D2096.8 | RVHELEIEFEGK          | 19  | 8463  | 1.17 | 0.15 | 13  |
| 22 D2096.8 | ADSFNFFFEPPK          | 13  | 799   | 1.30 | 0.17 | 13  |
| 22 D2096.8 | EQIDTPILEGLEGDQLAELYK | 23  | 1273  | 1.32 | 0.20 | 15  |
| 22 D2096.8 | RVHELEIEFEGK          | 41  | 4697  | 1.32 | 0.09 | 7   |
| 1 D2096.8  | RVHELEIEFEGK          | 32  | 8865  | 1.41 | 0.13 | 9   |
| 22 D2096.8 | EQIDTPILEGLEGDQLAELYK | 22  | 1378  | 1.57 | 0.22 | 14  |
| 22 D2096.8 | RVHELEIEFEGK          | 26  | 13487 | 1.63 | 0.15 | 9   |
| 7 D2096.8  | RVHELEIEFEGK          | 36  | 6823  | 1.69 | 0.10 | 6   |

|                      |                        |    |        |      |      |     |
|----------------------|------------------------|----|--------|------|------|-----|
| 22 D2096.8           | RVHELEIEFEGK           | 11 | 7350   | 1.77 | 0.09 | 5   |
| 1 D2096.8            | RVHELEIEFEGK           | 34 | 4834   | 2.87 | 0.13 | 4   |
| 1 D2096.8            | RVHELEIEFEGK           | 26 | 5049   | 3.04 | 0.09 | 3   |
| 22 E01A2.2a          | LREAHLENVQK            | 11 | 6156   | 1.01 | 0.14 | 14  |
| 22 E01A2.2a          | LREAHLENVQK            | 11 | 5265   | 1.14 | 0.11 | 10  |
| 1 E01A2.2a           | LREAHLENVQK            | 10 | 2362   | 1.39 | 0.18 | 13  |
| 10 E01G4.6           | ERALLVESEIK            | 11 | 1672   | 0.44 | 0.14 | 32  |
| 7 E01G4.6            | ERALLVESEIK            | 14 | 1444   | 0.45 | 0.32 | 71  |
| 1 E01G4.6            | SSSDVAVIENVK           | 14 | 677    | 0.99 | 0.17 | 17  |
| 10 E01G4.6           | ERALLVESEIK            | 13 | 2438   | 1.13 | 0.09 | 8   |
| 10 E01G4.6           | ERALLVESEIK            | 18 | 1319   | 1.16 | 0.17 | 14  |
| 10 E01G4.6           | QLLVIQRGVRK            | 13 | 7806   | 1.57 | 0.16 | 10  |
| 1 E01G4.6            | ERALLVESEIK            | 11 | 489    | 1.83 | 0.25 | 13  |
| 22 E01G4.6           | ERALLVESEIK            | 17 | 1256   | 3.53 | 0.11 | 3   |
| 22 E03G2.3           | HSADIEMILDHVK          | 26 | 1610   | 0.86 | 0.20 | 23  |
| 22 E03G2.3           | HSADIEMILDHVK          | 19 | 1397   | 0.91 | 0.21 | 24  |
| 22 E03G2.3           | HSADIEMILDHVK          | 23 | 1047   | 0.97 | 0.23 | 24  |
| 10 E03G2.3           | HSADIEMILDHVK          | 17 | 1952   | 1.43 | 0.15 | 10  |
| 22 E03G2.3           | HSADIEMILDHVK          | 12 | 1303   | 1.73 | 0.17 | 10  |
| 10 E03G2.3           | HSADIEMILDHVK          | 12 | 4517   | 1.84 | 0.20 | 11  |
| 22 E04A4.8           | MQIFATNHVIAK           | 66 | 4945   | 0.13 | 0.26 | 207 |
| 22 E04A4.8           | MQIFATNHVIAK           | 73 | 5421   | 0.14 | 0.14 | 105 |
| 7 E04A4.8            | MQIFATNHVIAK           | 21 | 2222   | 0.14 | 0.28 | 206 |
| 22 E04A4.8           | ALGETLNEYVVVGRK        | 81 | 5652   | 0.17 | 0.29 | 169 |
| 22 E04A4.8           | ANGEILSIK              | 49 | 4180   | 0.18 | 0.26 | 144 |
| 22 E04A4.8           | IRFPLPHRVTK            | 17 | 7480   | 0.20 | 0.50 | 256 |
| 22 E04A4.8           | ALGETLNEYVVVGRK        | 66 | 4626   | 0.20 | 0.52 | 258 |
| 22 E04A4.8           | MQIFATNHVIAK           | 42 | 4391   | 0.22 | 0.24 | 112 |
| 7 E04A4.8            | MQIFATNHVIAK           | 22 | 2656   | 0.28 | 0.15 | 54  |
| 10 E04A4.8           | IRFPLPHRVTK            | 16 | 20071  | 0.29 | 0.48 | 168 |
| 7 E04A4.8            | MQIFATNHVIAK           | 22 | 2723   | 0.32 | 0.32 | 100 |
| 22 E04A4.8           | MQIFATNHVIAK           | 45 | 4928   | 0.37 | 0.17 | 46  |
| 22 E04A4.8           | ANGEILSIK              | 38 | 3663   | 0.39 | 0.27 | 69  |
| 10 E04A4.8           | MQIFATNHVIAK           | 61 | 6138   | 0.40 | 0.15 | 37  |
| 10 E04A4.8           | MQIFATNHVIAK           | 56 | 7086   | 0.41 | 0.22 | 53  |
| 10 E04A4.8           | ALGETLNEYVVVGRK        | 64 | 3552   | 0.41 | 0.29 | 70  |
| 10 E04A4.8           | ANGEILSIK              | 49 | 2609   | 0.49 | 0.16 | 33  |
| 10 E04A4.8           | MQIFATNHVIAK           | 40 | 6140   | 0.68 | 0.24 | 35  |
| 1 E04A4.8            | MQIFATNHVIAK           | 58 | 2156   | 0.69 | 0.16 | 24  |
| 10 E04A4.8           | MQIFATNHVIAK           | 39 | 4993   | 0.79 | 0.17 | 22  |
| 10 E04A4.8           | IRFPLPHRVTK            | 13 | 29094  | 0.86 | 0.33 | 38  |
| 1 E04A4.8            | MQIFATNHVIAK           | 50 | 1888   | 0.99 | 0.11 | 11  |
| 10 E04A4.8           | ALGETLNEYVVVGRK        | 84 | 2682   | 1.14 | 0.42 | 37  |
| 22 E04A4.8           | EPVTPIWK               | 11 | 2297   | 1.54 | 0.23 | 15  |
| 1 E04A4.8            | MQIFATNHVIAK           | 32 | 4792   | 1.64 | 0.21 | 13  |
| 1 E04A4.8            | MQIFATNHVIAK           | 49 | 5107   | 1.80 | 0.15 | 8   |
| 1 E04F6.3            | AATVPDRAPDAVIEQK       | 16 | 6852   | 1.01 | 0.11 | 11  |
| 10 E04F6.5a          | VATIESLAK              | 46 | 863    | 1.17 | 0.13 | 11  |
| 10 E04F6.5a          | VATIESLAK              | 56 | 1297   | 1.18 | 0.21 | 18  |
| 10 E04F6.5a          | MLVEVNDVVK             | 37 | 787    | 2.31 | 0.20 | 9   |
| 10 E04F6.5a          | MLVEVNDVVK             | 11 | 545    | 3.15 | 0.15 | 5   |
| 22 E04F6.5a;E04F6.5b | VATIESLAK              | 70 | 1645   | 0.61 | 0.09 | 15  |
| 22 E04F6.5a;E04F6.5b | VATIESLAK              | 66 | 1631   | 0.64 | 0.12 | 18  |
| 10 F01F1.12a         | VTEQVLAFVYK            | 54 | 2511   | 0.26 | 0.09 | 35  |
| 1 F01F1.12a          | DELHQIALK              | 41 | 11421  | 0.30 | 0.10 | 34  |
| 10 F01F1.12a         | VTEQVLAFVYK            | 61 | 2716   | 0.34 | 0.10 | 30  |
| 1 F01F1.12a          | LDLGVVPLAGTIGEGTTQGLDK | 67 | 1169   | 0.35 | 0.15 | 42  |
| 1 F01F1.12a          | DELHQIALK              | 39 | 16803  | 0.36 | 0.08 | 23  |
| 1 F01F1.12a          | VTEQVLAFVYK            | 38 | 1120   | 0.40 | 0.12 | 31  |
| 10 F01F1.12a         | DELHQIALK              | 56 | 128142 | 0.40 | 0.06 | 15  |
| 10 F01F1.12a         | VTEQVLAFVYK            | 55 | 1478   | 0.41 | 0.16 | 40  |
| 10 F01F1.12a         | DELHQIALK              | 64 | 144486 | 0.44 | 0.08 | 19  |
| 10 F01F1.12a         | DELHQIALK              | 19 | 7386   | 0.45 | 0.14 | 31  |
| 1 F01F1.12a          | VTEQVLAFVYK            | 45 | 591    | 0.45 | 0.13 | 28  |
| 10 F01F1.12a         | LDLGVVPLAGTIGEGTTQGLDK | 83 | 2838   | 0.45 | 0.11 | 25  |
| 1 F01F1.12a          | VTEQVLAFVYK            | 46 | 779    | 0.46 | 0.17 | 38  |
| 1 F01F1.12a          | LDLGVVPLAGTIGEGTTQGLDK | 79 | 1453   | 0.46 | 0.14 | 32  |
| 10 F01F1.12a         | LAERAAAFK              | 42 | 56332  | 0.46 | 0.09 | 20  |
| 1 F01F1.12a          | LAERAAAFK              | 24 | 6441   | 0.47 | 0.14 | 31  |
| 10 F01F1.12a         | DELHQIALK              | 41 | 8020   | 0.47 | 0.15 | 31  |
| 10 F01F1.12a         | LDLGVVPLAGTIGEGTTQGLDK | 36 | 3060   | 0.48 | 0.10 | 22  |
| 10 F01F1.12a         | DELHQIALK              | 49 | 42907  | 0.50 | 0.09 | 18  |
| 10 F01F1.12a         | LDLGVVPLAGTIGEGTTQGLDK | 69 | 3017   | 0.50 | 0.15 | 30  |
| 10 F01F1.12a         | FTDLLIK                | 48 | 29634  | 0.51 | 0.09 | 17  |
| 10 F01F1.12a         | LDLGVVPLAGTIGEGTTQGLDK | 88 | 2354   | 0.52 | 0.11 | 21  |
| 10 F01F1.12a         | LDLGVVPLAGTIGEGTTQGLDK | 20 | 2137   | 0.54 | 0.18 | 34  |
| 10 F01F1.12a         | DELHQIALK              | 16 | 7450   | 0.54 | 0.06 | 12  |
| 10 F01F1.12a         | DELHQIALK              | 31 | 12853  | 0.55 | 0.10 | 18  |
| 1 F01F1.12a          | DELHQIALK              | 54 | 11606  | 0.57 | 0.07 | 13  |
| 10 F01F1.12a         | RLDAINLENNETNRQK       | 32 | 45619  | 0.57 | 0.17 | 30  |
| 10 F01F1.12a         | FTDLLIK                | 39 | 19918  | 0.57 | 0.12 | 22  |
| 1 F01F1.12a          | VTEQVLAFVYK            | 54 | 894    | 0.58 | 0.17 | 29  |
| 1 F01F1.12a          | DELHQIALK              | 34 | 6593   | 0.58 | 0.11 | 20  |
| 1 F01F1.12a          | LAERAAAFK              | 25 | 13471  | 0.58 | 0.06 | 11  |
| 10 F01F1.12a         | LAERAAAFK              | 12 | 2493   | 0.59 | 0.08 | 13  |
| 10 F01F1.12a         | DELHQIALK              | 30 | 11652  | 0.59 | 0.20 | 34  |
| 10 F01F1.12a         | DELHQIALK              | 37 | 14651  | 0.59 | 0.11 | 18  |
| 10 F01F1.12a         | LDLGVVPLAGTIGEGTTQGLDK | 27 | 2959   | 0.61 | 0.19 | 32  |
| 10 F01F1.12a         | GILAADESTGTIGK         | 65 | 21436  | 0.61 | 0.19 | 31  |
| 10 F01F1.12a         | DELHQIALK              | 64 | 51468  | 0.62 | 0.06 | 9   |
| 10 F01F1.12a         | VTEQVLAFVYK            | 42 | 2675   | 0.62 | 0.15 | 25  |
| 1 F01F1.12a          | LAERAAAFK              | 21 | 9490   | 0.62 | 0.09 | 14  |
| 1 F01F1.12a          | LAERAAAFK              | 13 | 1447   | 0.63 | 0.13 | 21  |
| 10 F01F1.12a         | DELHQIALK              | 45 | 6517   | 0.63 | 0.09 | 14  |
| 1 F01F1.12a          | DELHQIALK              | 59 | 17218  | 0.64 | 0.04 | 6   |
| 1 F01F1.12a          | DELHQIALK              | 17 | 6034   | 0.64 | 0.10 | 16  |
| 10 F01F1.12a         | VTEQVLAFVYK            | 56 | 1945   | 0.64 | 0.16 | 24  |
| 10 F01F1.12a         | YAGEDAAGAAAESLFVAK     | 71 | 1798   | 0.64 | 0.14 | 22  |
| 10 F01F1.12a         | DELHQIALK              | 30 | 10800  | 0.65 | 0.26 | 40  |
| 10 F01F1.12a         | VTEQVLAFVYK            | 35 | 1336   | 0.65 | 0.12 | 19  |
| 10 F01F1.12a         | VTEQVLAFVYK            | 41 | 1925   | 0.66 | 0.12 | 18  |

|              |                        |     |        |      |      |    |
|--------------|------------------------|-----|--------|------|------|----|
| 10 F01F1.12a | LDLGVVPLAGTIGEGTTQGLDK | 85  | 1680   | 0.67 | 0.18 | 26 |
| 10 F01F1.12a | GILAADESTGTIGK         | 22  | 995    | 0.67 | 0.21 | 31 |
| 10 F01F1.12a | LAERAAAFK              | 12  | 4124   | 0.68 | 0.17 | 25 |
| 1 F01F1.12a  | DELHQIALK              | 16  | 4193   | 0.68 | 0.19 | 28 |
| 1 F01F1.12a  | DELHQIALK              | 13  | 2182   | 0.68 | 0.19 | 27 |
| 10 F01F1.12a | LDLGVVPLAGTIGEGTTQGLDK | 88  | 2111   | 0.71 | 0.14 | 19 |
| 10 F01F1.12a | YAGEDAAGAAAESLFVAK     | 77  | 2405   | 0.71 | 0.15 | 21 |
| 10 F01F1.12a | LDLGVVPLAGTIGEGTTQGLDK | 51  | 1207   | 0.72 | 0.17 | 24 |
| 10 F01F1.12a | LDLGVVPLAGTIGEGTTQGLDK | 65  | 1890   | 0.73 | 0.15 | 20 |
| 10 F01F1.12a | RLDAINLENNETNRQK       | 57  | 46396  | 0.73 | 0.30 | 41 |
| 1 F01F1.12a  | LAERAAAFK              | 35  | 2865   | 0.73 | 0.11 | 14 |
| 10 F01F1.12a | LAERAAAFK              | 40  | 46256  | 0.74 | 0.20 | 27 |
| 10 F01F1.12a | LAERAAAFK              | 19  | 5837   | 0.76 | 0.15 | 20 |
| 10 F01F1.12a | QGIVPGIK               | 50  | 131705 | 0.76 | 0.05 | 6  |
| 1 F01F1.12a  | LDLGVVPLAGTIGEGTTQGLDK | 84  | 1401   | 0.77 | 0.16 | 21 |
| 1 F01F1.12a  | LAERAAAFK              | 25  | 799    | 0.77 | 0.31 | 40 |
| 1 F01F1.12a  | GILAADESTGTIGK         | 15  | 580    | 0.78 | 0.27 | 35 |
| 10 F01F1.12a | YAGEDAAGAAAESLFVAK     | 133 | 5230   | 0.78 | 0.09 | 12 |
| 10 F01F1.12a | DELHQIALK              | 30  | 6598   | 0.79 | 0.12 | 15 |
| 10 F01F1.12a | LAERAAAFK              | 11  | 3958   | 0.79 | 0.17 | 22 |
| 10 F01F1.12a | GILAADESTGTIGK         | 65  | 16267  | 0.79 | 0.14 | 18 |
| 10 F01F1.12a | DELHQIALK              | 31  | 3704   | 0.80 | 0.13 | 17 |
| 10 F01F1.12a | RLDAINLENNETNRQK       | 44  | 15546  | 0.80 | 0.17 | 21 |
| 10 F01F1.12a | QGIVPGIK               | 43  | 105003 | 0.82 | 0.14 | 17 |
| 1 F01F1.12a  | FTDLLIK                | 14  | 419    | 0.82 | 0.18 | 22 |
| 1 F01F1.12a  | LAERAAAFK              | 27  | 7538   | 0.82 | 0.10 | 12 |
| 10 F01F1.12a | VTEQVLAFVYK            | 74  | 2820   | 0.83 | 0.12 | 15 |
| 10 F01F1.12a | LAERAAAFK              | 15  | 9133   | 0.84 | 0.09 | 11 |
| 1 F01F1.12a  | GILAADESTGTIGK         | 24  | 955    | 0.84 | 0.10 | 12 |
| 10 F01F1.12a | VTEQVLAFVYK            | 59  | 2166   | 0.84 | 0.18 | 21 |
| 10 F01F1.12a | DELHQIALK              | 42  | 18438  | 0.84 | 0.06 | 7  |
| 10 F01F1.12a | QGIVPGIK               | 37  | 10305  | 0.85 | 0.04 | 5  |
| 1 F01F1.12a  | RLDAINLENNETNRQK       | 56  | 11138  | 0.85 | 0.11 | 12 |
| 1 F01F1.12a  | LDLGVVPLAGTIGEGTTQGLDK | 35  | 695    | 0.86 | 0.23 | 27 |
| 1 F01F1.12a  | LAERAAAFK              | 21  | 2941   | 0.86 | 0.09 | 11 |
| 10 F01F1.12a | YAGEDAAGAAAESLFVAK     | 86  | 3443   | 0.86 | 0.08 | 10 |
| 1 F01F1.12a  | VTEQVLAFVYK            | 20  | 417    | 0.87 | 0.11 | 13 |
| 1 F01F1.12a  | DELHQIALK              | 26  | 3971   | 0.87 | 0.10 | 11 |
| 1 F01F1.12a  | DELHQIALK              | 11  | 3491   | 0.87 | 0.18 | 20 |
| 1 F01F1.12a  | RLDAINLENNETNRQK       | 30  | 10906  | 0.87 | 0.13 | 16 |
| 10 F01F1.12a | GILAADESTGTIGK         | 69  | 4199   | 0.89 | 0.16 | 18 |
| 1 F01F1.12a  | LAERAAAFK              | 35  | 4422   | 0.89 | 0.09 | 10 |
| 1 F01F1.12a  | GILAADESTGTIGK         | 99  | 4184   | 0.90 | 0.12 | 13 |
| 1 F01F1.12a  | DELHQIALK              | 15  | 3045   | 0.90 | 0.10 | 11 |
| 10 F01F1.12a | DELHQIALK              | 35  | 10045  | 0.91 | 0.07 | 8  |
| 10 F01F1.12a | LAERAAAFK              | 17  | 6116   | 0.91 | 0.26 | 29 |
| 1 F01F1.12a  | QGIVPGIK               | 15  | 8214   | 0.92 | 0.06 | 7  |
| 10 F01F1.12a | QGIVPGIK               | 13  | 7287   | 0.92 | 0.12 | 13 |
| 1 F01F1.12a  | RLDAINLENNETNRQK       | 11  | 3045   | 0.92 | 0.15 | 16 |
| 10 F01F1.12a | LDLGVVPLAGTIGEGTTQGLDK | 28  | 2024   | 0.92 | 0.15 | 17 |
| 10 F01F1.12a | YAGEDAAGAAAESLFVAK     | 91  | 2086   | 0.93 | 0.15 | 17 |
| 10 F01F1.12a | LAERAAAFK              | 14  | 4757   | 0.94 | 0.08 | 9  |
| 10 F01F1.12a | RLDAINLENNETNRQK       | 12  | 15098  | 0.95 | 0.11 | 12 |
| 1 F01F1.12a  | YAGEDAAGAAAESLFVAK     | 92  | 1682   | 0.96 | 0.14 | 15 |
| 1 F01F1.12a  | YAGEDAAGAAAESLFVAK     | 76  | 1640   | 0.96 | 0.09 | 10 |
| 1 F01F1.12a  | GILAADESTGTIGK         | 100 | 5506   | 0.96 | 0.11 | 11 |
| 10 F01F1.12a | DELHQIALK              | 14  | 6817   | 0.96 | 0.10 | 11 |
| 1 F01F1.12a  | GILAADESTGTIGK         | 31  | 1225   | 0.96 | 0.11 | 12 |
| 1 F01F1.12a  | RLDAINLENNETNRQK       | 16  | 6416   | 0.97 | 0.11 | 11 |
| 10 F01F1.12a | QGIVPGIK               | 11  | 8447   | 0.97 | 0.10 | 10 |
| 1 F01F1.12a  | GILAADESTGTIGK         | 43  | 1406   | 0.98 | 0.21 | 21 |
| 1 F01F1.12a  | DELHQIALK              | 33  | 3820   | 0.99 | 0.12 | 12 |
| 1 F01F1.12a  | GILAADESTGTIGK         | 14  | 988    | 1.00 | 0.14 | 14 |
| 10 F01F1.12a | RLDAINLENNETNRQK       | 38  | 22796  | 1.01 | 0.14 | 14 |
| 1 F01F1.12a  | LAERAAAFK              | 19  | 6245   | 1.02 | 0.13 | 13 |
| 10 F01F1.12a | YAGEDAAGAAAESLFVAK     | 126 | 3359   | 1.03 | 0.15 | 14 |
| 10 F01F1.12a | LDLGVVPLAGTIGEGTTQGLDK | 58  | 1241   | 1.05 | 0.16 | 16 |
| 10 F01F1.12a | DELHQIALK              | 14  | 3225   | 1.05 | 0.17 | 16 |
| 10 F01F1.12a | RLDAINLENNETNRQK       | 42  | 14402  | 1.05 | 0.08 | 8  |
| 1 F01F1.12a  | DELHQIALK              | 26  | 3632   | 1.06 | 0.38 | 36 |
| 10 F01F1.12a | GILAADESTGTIGK         | 88  | 5472   | 1.06 | 0.13 | 12 |
| 10 F01F1.12a | YAGEDAAGAAAESLFVAK     | 104 | 4194   | 1.06 | 0.16 | 15 |
| 1 F01F1.12a  | LAERAAAFK              | 17  | 1455   | 1.07 | 0.06 | 6  |
| 10 F01F1.12a | DELHQIALK              | 23  | 5809   | 1.08 | 0.11 | 11 |
| 10 F01F1.12a | RLDAINLENNETNRQK       | 30  | 5567   | 1.08 | 0.10 | 9  |
| 1 F01F1.12a  | RLDAINLENNETNRQK       | 23  | 4395   | 1.08 | 0.10 | 10 |
| 1 F01F1.12a  | RLDAINLENNETNRQK       | 19  | 9098   | 1.09 | 0.12 | 11 |
| 10 F01F1.12a | LAERAAAFK              | 22  | 9947   | 1.09 | 0.13 | 12 |
| 1 F01F1.12a  | DELHQIALK              | 21  | 7969   | 1.10 | 0.05 | 5  |
| 1 F01F1.12a  | DELHQIALK              | 27  | 6093   | 1.12 | 0.05 | 5  |
| 1 F01F1.12a  | VTEQVLAFVYK            | 18  | 423    | 1.13 | 0.20 | 17 |
| 10 F01F1.12a | YAGEDAAGAAAESLFVAK     | 104 | 2642   | 1.14 | 0.15 | 13 |
| 1 F01F1.12a  | VTEQVLAFVYK            | 39  | 1054   | 1.14 | 0.12 | 11 |
| 1 F01F1.12a  | GILAADESTGTIGK         | 24  | 490    | 1.15 | 0.12 | 10 |
| 10 F01F1.12a | QGIVPGIK               | 17  | 13637  | 1.17 | 0.24 | 21 |
| 10 F01F1.12a | DELHQIALK              | 27  | 8757   | 1.17 | 0.10 | 9  |
| 10 F01F1.12a | VTEQVLAFVYK            | 51  | 827    | 1.17 | 0.19 | 16 |
| 10 F01F1.12a | LAERAAAFK              | 23  | 4730   | 1.18 | 0.40 | 34 |
| 1 F01F1.12a  | QGIVPGIK               | 18  | 9189   | 1.19 | 0.17 | 14 |
| 1 F01F1.12a  | LAERAAAFK              | 21  | 4630   | 1.19 | 0.11 | 9  |
| 1 F01F1.12a  | VTEQVLAFVYK            | 48  | 1206   | 1.20 | 0.07 | 6  |
| 10 F01F1.12a | RLDAINLENNETNRQK       | 35  | 11588  | 1.21 | 0.14 | 11 |
| 10 F01F1.12a | VTEQVLAFVYK            | 56  | 1620   | 1.22 | 0.13 | 11 |
| 10 F01F1.12a | RLDAINLENNETNRQK       | 14  | 4602   | 1.24 | 0.14 | 11 |
| 1 F01F1.12a  | VTEQVLAFVYK            | 66  | 1162   | 1.26 | 0.14 | 11 |
| 1 F01F1.12a  | RLDAINLENNETNRQK       | 19  | 6509   | 1.26 | 0.17 | 14 |
| 10 F01F1.12a | FTDLLIK                | 21  | 822    | 1.26 | 0.14 | 11 |
| 10 F01F1.12a | QGIVPGIK               | 34  | 11302  | 1.27 | 0.11 | 9  |
| 1 F01F1.12a  | YAGEDAAGAAAESLFVAK     | 95  | 1923   | 1.29 | 0.14 | 11 |
| 1 F01F1.12a  | YAGEDAAGAAAESLFVAK     | 117 | 3053   | 1.30 | 0.14 | 11 |
| 10 F01F1.12a | RLDAINLENNETNRQK       | 24  | 13478  | 1.30 | 0.17 | 13 |

|                        |                        |     |        |      |      |    |
|------------------------|------------------------|-----|--------|------|------|----|
| 1 F01F1.12a            | VTEQVLAFVYK            | 44  | 1251   | 1.30 | 0.08 | 6  |
| 1 F01F1.12a            | QGIVPGIK               | 21  | 10842  | 1.31 | 0.13 | 10 |
| 1 F01F1.12a            | QGIVPGIK               | 21  | 2119   | 1.34 | 0.16 | 12 |
| 10 F01F1.12a           | VTEQVLAFVYK            | 58  | 1319   | 1.34 | 0.11 | 8  |
| 10 F01F1.12a           | FTDLLIK                | 35  | 1010   | 1.34 | 0.14 | 10 |
| 1 F01F1.12a            | QGIVPGIK               | 13  | 7727   | 1.35 | 0.11 | 8  |
| 10 F01F1.12a           | LAERAAAFK              | 12  | 2139   | 1.36 | 0.09 | 7  |
| 10 F01F1.12a           | VTEQVLAFVYK            | 68  | 1748   | 1.36 | 0.09 | 6  |
| 1 F01F1.12a            | RLDAINLENNETNRQK       | 13  | 8794   | 1.38 | 0.27 | 19 |
| 1 F01F1.12a            | YAGEDAAGAAAESLFVAK     | 89  | 1898   | 1.39 | 0.21 | 15 |
| 10 F01F1.12a           | LAERAAAFK              | 15  | 4265   | 1.39 | 0.15 | 11 |
| 1 F01F1.12a            | GILAADESTGTIGK         | 66  | 1930   | 1.39 | 0.18 | 13 |
| 1 F01F1.12a            | RLDAINLENNETNRQK       | 20  | 4656   | 1.39 | 0.21 | 15 |
| 1 F01F1.12a            | GILAADESTGTIGK         | 22  | 1583   | 1.41 | 0.10 | 7  |
| 1 F01F1.12a            | QGIVPGIK               | 11  | 6740   | 1.42 | 0.08 | 6  |
| 10 F01F1.12a           | RLDAINLENNETNRQK       | 13  | 11229  | 1.43 | 0.22 | 15 |
| 1 F01F1.12a            | GILAADESTGTIGK         | 103 | 36503  | 1.46 | 0.07 | 5  |
| 10 F01F1.12a           | GILAADESTGTIGK         | 98  | 14641  | 1.48 | 0.10 | 6  |
| 1 F01F1.12a            | RLDAINLENNETNRQK       | 29  | 2755   | 1.48 | 0.18 | 12 |
| 1 F01F1.12a            | DELHQIALK              | 43  | 6161   | 1.48 | 0.16 | 11 |
| 10 F01F1.12a           | QGIVPGIK               | 28  | 11924  | 1.48 | 0.08 | 5  |
| 10 F01F1.12a           | LAERAAAFK              | 27  | 8474   | 1.50 | 0.18 | 12 |
| 1 F01F1.12a            | GILAADESTGTIGK         | 92  | 42654  | 1.56 | 0.08 | 5  |
| 10 F01F1.12a           | RLDAINLENNETNRQK       | 11  | 9793   | 1.57 | 0.05 | 3  |
| 1 F01F1.12a            | YAGEDAAGAAAESLFVAK     | 102 | 1704   | 1.58 | 0.16 | 10 |
| 10 F01F1.12a           | LAERAAAFK              | 19  | 5329   | 1.59 | 0.24 | 15 |
| 1 F01F1.12a            | DELHQIALK              | 34  | 3638   | 1.62 | 0.06 | 3  |
| 1 F01F1.12a            | RLDAINLENNETNRQK       | 40  | 10895  | 1.62 | 0.26 | 16 |
| 1 F01F1.12a            | QGIVPGIK               | 16  | 2396   | 1.66 | 0.22 | 13 |
| 1 F01F1.12a            | QGIVPGIK               | 16  | 3699   | 1.73 | 0.11 | 6  |
| 1 F01F1.12a            | GILAADESTGTIGK         | 56  | 1513   | 1.73 | 0.13 | 7  |
| 10 F01F1.12a           | LAERAAAFK              | 17  | 3680   | 1.75 | 0.38 | 22 |
| 1 F01F1.12a            | YAGEDAAGAAAESLFVAK     | 44  | 570    | 1.76 | 0.19 | 11 |
| 10 F01F1.12a           | RLDAINLENNETNRQK       | 22  | 8219   | 1.77 | 0.16 | 9  |
| 1 F01F1.12a            | YAGEDAAGAAAESLFVAK     | 82  | 991    | 1.81 | 0.19 | 11 |
| 10 F01F1.12a           | GILAADESTGTIGK         | 14  | 1117   | 1.81 | 0.17 | 10 |
| 10 F01F1.12a           | QGIVPGIK               | 32  | 9636   | 1.82 | 0.25 | 14 |
| 1 F01F1.12a            | GILAADESTGTIGK         | 26  | 1968   | 1.85 | 0.16 | 9  |
| 1 F01F1.12a            | RLDAINLENNETNRQK       | 43  | 8704   | 1.89 | 0.22 | 11 |
| 10 F01F1.12a           | GILAADESTGTIGK         | 99  | 6492   | 1.91 | 0.10 | 5  |
| 1 F01F1.12a            | GILAADESTGTIGK         | 72  | 2136   | 1.97 | 0.20 | 10 |
| 10 F01F1.12a           | GILAADESTGTIGK         | 61  | 2580   | 1.99 | 0.13 | 7  |
| 10 F01F1.12a           | QGIVPGIK               | 16  | 10141  | 1.99 | 0.19 | 10 |
| 10 F01F1.12a           | RLDAINLENNETNRQK       | 38  | 8299   | 2.01 | 0.21 | 11 |
| 1 F01F1.12a            | RLDAINLENNETNRQK       | 34  | 7424   | 2.04 | 0.11 | 5  |
| 10 F01F1.12a           | GILAADESTGTIGK         | 69  | 3227   | 2.33 | 0.12 | 5  |
| 1 F01F1.12a            | FTDLLIK                | 29  | 635    | 2.38 | 0.13 | 6  |
| 10 F01F1.12a           | RLDAINLENNETNRQK       | 45  | 7170   | 2.40 | 0.43 | 18 |
| 1 F01F1.12a            | GILAADESTGTIGK         | 63  | 1043   | 2.55 | 0.17 | 7  |
| 1 F01F1.12a            | GILAADESTGTIGK         | 55  | 1555   | 3.02 | 0.17 | 6  |
| 10 F01F1.12a           | FTDLLIK                | 11  | 514    | 3.11 | 0.19 | 6  |
| 1 F01F1.12a            | GILAADESTGTIGK         | 32  | 597    | 3.32 | 0.17 | 5  |
| 1 F01F1.12a            | GILAADESTGTIGK         | 37  | 384    | 4.07 | 0.15 | 4  |
| 22 F01F1.12a;F01F1.12b | VTEQVLAFVYK            | 60  | 2163   | 0.28 | 0.13 | 47 |
| 22 F01F1.12a;F01F1.12b | LDLGVVPLAGTIGEGTTQGLDK | 62  | 3317   | 0.30 | 0.06 | 20 |
| 22 F01F1.12a;F01F1.12b | VTEQVLAFVYK            | 64  | 2641   | 0.36 | 0.18 | 50 |
| 22 F01F1.12a;F01F1.12b | DELHQIALK              | 44  | 22599  | 0.38 | 0.13 | 34 |
| 22 F01F1.12a;F01F1.12b | LDLGVVPLAGTIGEGTTQGLDK | 61  | 2390   | 0.39 | 0.15 | 38 |
| 22 F01F1.12a;F01F1.12b | DELHQIALK              | 42  | 35255  | 0.39 | 0.07 | 19 |
| 22 F01F1.12a;F01F1.12b | DELHQIALK              | 43  | 13757  | 0.41 | 0.15 | 36 |
| 22 F01F1.12a;F01F1.12b | DELHQIALK              | 43  | 10930  | 0.42 | 0.17 | 40 |
| 22 F01F1.12a;F01F1.12b | VTEQVLAFVYK            | 47  | 1182   | 0.42 | 0.23 | 55 |
| 22 F01F1.12a;F01F1.12b | LDLGVVPLAGTIGEGTTQGLDK | 24  | 3436   | 0.42 | 0.28 | 66 |
| 7 F01F1.12a;F01F1.12b  | GILAADESTGTIGK         | 94  | 9493   | 0.44 | 0.11 | 25 |
| 22 F01F1.12a;F01F1.12b | VTEQVLAFVYK            | 64  | 1467   | 0.44 | 0.33 | 75 |
| 22 F01F1.12a;F01F1.12b | LDLGVVPLAGTIGEGTTQGLDK | 91  | 2380   | 0.45 | 0.19 | 43 |
| 7 F01F1.12a;F01F1.12b  | GILAADESTGTIGK         | 102 | 13062  | 0.45 | 0.08 | 17 |
| 22 F01F1.12a;F01F1.12b | DELHQIALK              | 53  | 36708  | 0.46 | 0.11 | 23 |
| 22 F01F1.12a;F01F1.12b | VTEQVLAFVYK            | 44  | 1297   | 0.46 | 0.11 | 23 |
| 22 F01F1.12a;F01F1.12b | VTEQVLAFVYK            | 66  | 1893   | 0.46 | 0.06 | 14 |
| 22 F01F1.12a;F01F1.12b | DELHQIALK              | 18  | 4799   | 0.46 | 0.19 | 40 |
| 22 F01F1.12a;F01F1.12b | DELHQIALK              | 48  | 15649  | 0.46 | 0.10 | 21 |
| 22 F01F1.12a;F01F1.12b | DELHQIALK              | 23  | 4559   | 0.47 | 0.18 | 37 |
| 22 F01F1.12a;F01F1.12b | YAGEDAAGAAAESLFVAK     | 64  | 869    | 0.47 | 0.19 | 40 |
| 22 F01F1.12a;F01F1.12b | LTFSYGRALQASVLK        | 62  | 1853   | 0.48 | 0.23 | 49 |
| 7 F01F1.12a;F01F1.12b  | FTDLLIK                | 36  | 2015   | 0.48 | 0.10 | 20 |
| 22 F01F1.12a;F01F1.12b | DELHQIALK              | 44  | 19370  | 0.48 | 0.10 | 21 |
| 22 F01F1.12a;F01F1.12b | LDLGVVPLAGTIGEGTTQGLDK | 22  | 2062   | 0.48 | 0.30 | 62 |
| 7 F01F1.12a;F01F1.12b  | RLDAINLENNETNRQK       | 23  | 6470   | 0.48 | 0.20 | 42 |
| 22 F01F1.12a;F01F1.12b | FTDLLIK                | 55  | 20778  | 0.49 | 0.12 | 25 |
| 22 F01F1.12a;F01F1.12b | DELHQIALK              | 53  | 172572 | 0.50 | 0.06 | 11 |
| 7 F01F1.12a;F01F1.12b  | YAGEDAAGAAAESLFVAK     | 92  | 1549   | 0.50 | 0.25 | 51 |
| 22 F01F1.12a;F01F1.12b | FTDLLIK                | 18  | 762    | 0.50 | 0.11 | 22 |
| 7 F01F1.12a;F01F1.12b  | DELHQIALK              | 48  | 26084  | 0.50 | 0.15 | 30 |
| 7 F01F1.12a;F01F1.12b  | RLDAINLENNETNRQK       | 19  | 10013  | 0.51 | 0.12 | 24 |
| 7 F01F1.12a;F01F1.12b  | DELHQIALK              | 61  | 18517  | 0.52 | 0.12 | 23 |
| 7 F01F1.12a;F01F1.12b  | DELHQIALK              | 43  | 11219  | 0.52 | 0.10 | 19 |
| 22 F01F1.12a;F01F1.12b | LDLGVVPLAGTIGEGTTQGLDK | 28  | 3233   | 0.52 | 0.10 | 20 |
| 22 F01F1.12a;F01F1.12b | QGIVPGIK               | 21  | 6192   | 0.53 | 0.15 | 29 |
| 22 F01F1.12a;F01F1.12b | LAERAAAFK              | 19  | 2253   | 0.53 | 0.14 | 26 |
| 22 F01F1.12a;F01F1.12b | LAERAAAFK              | 23  | 7011   | 0.53 | 0.30 | 57 |
| 7 F01F1.12a;F01F1.12b  | DELHQIALK              | 26  | 9580   | 0.53 | 0.08 | 14 |
| 22 F01F1.12a;F01F1.12b | DELHQIALK              | 62  | 194287 | 0.56 | 0.08 | 14 |
| 7 F01F1.12a;F01F1.12b  | LAERAAAFK              | 12  | 3067   | 0.58 | 0.08 | 13 |
| 7 F01F1.12a;F01F1.12b  | DELHQIALK              | 29  | 12122  | 0.59 | 0.06 | 10 |
| 22 F01F1.12a;F01F1.12b | VTEQVLAFVYK            | 53  | 826    | 0.59 | 0.08 | 14 |
| 22 F01F1.12a;F01F1.12b | VTEQVLAFVYK            | 45  | 2892   | 0.59 | 0.12 | 21 |
| 22 F01F1.12a;F01F1.12b | VTEQVLAFVYK            | 43  | 1738   | 0.59 | 0.13 | 22 |
| 22 F01F1.12a;F01F1.12b | DELHQIALK              | 40  | 18886  | 0.60 | 0.12 | 20 |
| 22 F01F1.12a;F01F1.12b | FTDLLIK                | 46  | 14967  | 0.60 | 0.14 | 23 |
| 22 F01F1.12a;F01F1.12b | LDLGVVPLAGTIGEGTTQGLDK | 18  | 2370   | 0.60 | 0.15 | 25 |

|                        |                        |     |        |      |      |    |
|------------------------|------------------------|-----|--------|------|------|----|
| 22 F01F1.12a;F01F1.12b | LAERAAAFK              | 26  | 70741  | 0.61 | 0.07 | 12 |
| 22 F01F1.12a;F01F1.12b | DELHQIALK              | 24  | 6697   | 0.61 | 0.08 | 13 |
| 22 F01F1.12a;F01F1.12b | VTEQVLAFVYK            | 52  | 2535   | 0.62 | 0.10 | 15 |
| 7 F01F1.12a;F01F1.12b  | DELHQIALK              | 10  | 1848   | 0.63 | 0.23 | 36 |
| 22 F01F1.12a;F01F1.12b | VTEQVLAFVYK            | 63  | 2869   | 0.63 | 0.10 | 17 |
| 7 F01F1.12a;F01F1.12b  | GILAADESTGTIGK         | 73  | 3188   | 0.63 | 0.14 | 22 |
| 22 F01F1.12a;F01F1.12b | YAGEDAAGAAAESLFVAK     | 96  | 3632   | 0.64 | 0.08 | 12 |
| 7 F01F1.12a;F01F1.12b  | RLDAINLENNETNRQK       | 33  | 5576   | 0.64 | 0.15 | 23 |
| 7 F01F1.12a;F01F1.12b  | DELHQIALK              | 45  | 25713  | 0.64 | 0.08 | 13 |
| 22 F01F1.12a;F01F1.12b | LAERAAAFK              | 28  | 57346  | 0.64 | 0.10 | 15 |
| 7 F01F1.12a;F01F1.12b  | YAGEDAAGAAAESLFVAK     | 96  | 1790   | 0.64 | 0.19 | 30 |
| 7 F01F1.12a;F01F1.12b  | DELHQIALK              | 32  | 4229   | 0.65 | 0.13 | 20 |
| 7 F01F1.12a;F01F1.12b  | FTDLLIK                | 33  | 1754   | 0.65 | 0.10 | 15 |
| 7 F01F1.12a;F01F1.12b  | DELHQIALK              | 44  | 59704  | 0.65 | 0.10 | 15 |
| 7 F01F1.12a;F01F1.12b  | LAERAAAFK              | 14  | 1529   | 0.66 | 0.20 | 31 |
| 7 F01F1.12a;F01F1.12b  | FTDLLIK                | 31  | 1156   | 0.67 | 0.15 | 22 |
| 7 F01F1.12a;F01F1.12b  | DELHQIALK              | 18  | 2506   | 0.67 | 0.14 | 21 |
| 22 F01F1.12a;F01F1.12b | YAGEDAAGAAAESLFVAK     | 135 | 8050   | 0.67 | 0.11 | 16 |
| 22 F01F1.12a;F01F1.12b | DELHQIALK              | 30  | 2544   | 0.67 | 0.33 | 49 |
| 22 F01F1.12a;F01F1.12b | DELHQIALK              | 27  | 7328   | 0.67 | 0.09 | 13 |
| 7 F01F1.12a;F01F1.12b  | FTDLLIK                | 11  | 571    | 0.67 | 0.16 | 24 |
| 7 F01F1.12a;F01F1.12b  | RLDAINLENNETNRQK       | 20  | 9343   | 0.68 | 0.22 | 33 |
| 22 F01F1.12a;F01F1.12b | DELHQIALK              | 22  | 7166   | 0.68 | 0.12 | 18 |
| 22 F01F1.12a;F01F1.12b | DELHQIALK              | 34  | 3535   | 0.69 | 0.26 | 37 |
| 7 F01F1.12a;F01F1.12b  | RLDAINLENNETNRQK       | 28  | 9826   | 0.69 | 0.30 | 44 |
| 7 F01F1.12a;F01F1.12b  | DELHQIALK              | 25  | 2945   | 0.69 | 0.13 | 19 |
| 7 F01F1.12a;F01F1.12b  | DELHQIALK              | 10  | 4030   | 0.69 | 0.08 | 12 |
| 22 F01F1.12a;F01F1.12b | DELHQIALK              | 25  | 9680   | 0.70 | 0.04 | 6  |
| 22 F01F1.12a;F01F1.12b | YAGEDAAGAAAESLFVAK     | 142 | 7009   | 0.70 | 0.10 | 14 |
| 22 F01F1.12a;F01F1.12b | DELHQIALK              | 19  | 4369   | 0.70 | 0.08 | 12 |
| 7 F01F1.12a;F01F1.12b  | LAERAAAFK              | 15  | 4569   | 0.70 | 0.10 | 15 |
| 7 F01F1.12a;F01F1.12b  | RLDAINLENNETNRQK       | 17  | 7358   | 0.70 | 0.11 | 15 |
| 7 F01F1.12a;F01F1.12b  | DELHQIALK              | 31  | 5589   | 0.71 | 0.08 | 11 |
| 7 F01F1.12a;F01F1.12b  | LAERAAAFK              | 16  | 4447   | 0.72 | 0.19 | 27 |
| 7 F01F1.12a;F01F1.12b  | LAERAAAFK              | 18  | 2243   | 0.72 | 0.10 | 14 |
| 7 F01F1.12a;F01F1.12b  | DELHQIALK              | 24  | 5242   | 0.73 | 0.04 | 6  |
| 22 F01F1.12a;F01F1.12b | LAERAAAFK              | 13  | 1696   | 0.74 | 0.16 | 22 |
| 7 F01F1.12a;F01F1.12b  | DELHQIALK              | 20  | 3312   | 0.74 | 0.19 | 26 |
| 22 F01F1.12a;F01F1.12b | VTEQVLAFVYK            | 49  | 3869   | 0.75 | 0.08 | 11 |
| 22 F01F1.12a;F01F1.12b | VTEQVLAFVYK            | 53  | 2885   | 0.75 | 0.09 | 12 |
| 7 F01F1.12a;F01F1.12b  | DELHQIALK              | 21  | 3472   | 0.75 | 0.32 | 42 |
| 7 F01F1.12a;F01F1.12b  | FTDLLIK                | 31  | 706    | 0.76 | 0.08 | 11 |
| 22 F01F1.12a;F01F1.12b | GILAADESTGTIGK         | 98  | 86951  | 0.76 | 0.12 | 15 |
| 7 F01F1.12a;F01F1.12b  | YAGEDAAGAAAESLFVAK     | 116 | 2535   | 0.77 | 0.17 | 22 |
| 22 F01F1.12a;F01F1.12b | FTDLLIK                | 16  | 762    | 0.77 | 0.18 | 24 |
| 7 F01F1.12a;F01F1.12b  | DELHQIALK              | 58  | 96092  | 0.78 | 0.09 | 12 |
| 22 F01F1.12a;F01F1.12b | GILAADESTGTIGK         | 84  | 69466  | 0.78 | 0.11 | 14 |
| 22 F01F1.12a;F01F1.12b | DELHQIALK              | 40  | 8199   | 0.78 | 0.06 | 7  |
| 7 F01F1.12a;F01F1.12b  | FTDLLIK                | 18  | 1499   | 0.78 | 0.07 | 8  |
| 22 F01F1.12a;F01F1.12b | LAERAAAFK              | 24  | 6052   | 0.78 | 0.07 | 9  |
| 22 F01F1.12a;F01F1.12b | YAGEDAAGAAAESLFVAK     | 81  | 2836   | 0.79 | 0.17 | 22 |
| 7 F01F1.12a;F01F1.12b  | LAERAAAFK              | 15  | 2870   | 0.79 | 0.23 | 29 |
| 7 F01F1.12a;F01F1.12b  | RLDAINLENNETNRQK       | 20  | 4464   | 0.79 | 0.25 | 32 |
| 22 F01F1.12a;F01F1.12b | DELHQIALK              | 25  | 1543   | 0.79 | 0.20 | 25 |
| 7 F01F1.12a;F01F1.12b  | LAERAAAFK              | 11  | 3963   | 0.79 | 0.11 | 14 |
| 22 F01F1.12a;F01F1.12b | RLDAINLENNETNRQK       | 34  | 13249  | 0.80 | 0.21 | 26 |
| 7 F01F1.12a;F01F1.12b  | RLDAINLENNETNRQK       | 31  | 11731  | 0.80 | 0.11 | 13 |
| 22 F01F1.12a;F01F1.12b | LAERAAAFK              | 21  | 4375   | 0.80 | 0.19 | 24 |
| 7 F01F1.12a;F01F1.12b  | DELHQIALK              | 20  | 1409   | 0.80 | 0.30 | 37 |
| 7 F01F1.12a;F01F1.12b  | VTEQVLAFVYK            | 69  | 2557   | 0.80 | 0.12 | 15 |
| 7 F01F1.12a;F01F1.12b  | FTDLLIK                | 52  | 2460   | 0.80 | 0.18 | 23 |
| 22 F01F1.12a;F01F1.12b | RLDAINLENNETNRQK       | 37  | 7493   | 0.81 | 0.23 | 29 |
| 7 F01F1.12a;F01F1.12b  | LAERAAAFK              | 11  | 2941   | 0.81 | 0.10 | 12 |
| 22 F01F1.12a;F01F1.12b | LAERAAAFK              | 16  | 1645   | 0.82 | 0.19 | 23 |
| 22 F01F1.12a;F01F1.12b | QGIVPGIK               | 27  | 4686   | 0.82 | 0.10 | 12 |
| 7 F01F1.12a;F01F1.12b  | QGIVPGIK               | 18  | 4413   | 0.83 | 0.15 | 18 |
| 7 F01F1.12a;F01F1.12b  | RLDAINLENNETNRQK       | 39  | 9390   | 0.84 | 0.08 | 9  |
| 22 F01F1.12a;F01F1.12b | GILAADESTGTIGK         | 61  | 4612   | 0.84 | 0.12 | 14 |
| 7 F01F1.12a;F01F1.12b  | RLDAINLENNETNRQK       | 33  | 10039  | 0.84 | 0.18 | 21 |
| 7 F01F1.12a;F01F1.12b  | DELHQIALK              | 16  | 1930   | 0.84 | 0.17 | 20 |
| 7 F01F1.12a;F01F1.12b  | DELHQIALK              | 12  | 1337   | 0.84 | 0.09 | 11 |
| 7 F01F1.12a;F01F1.12b  | LAERAAAFK              | 25  | 4074   | 0.85 | 0.08 | 9  |
| 22 F01F1.12a;F01F1.12b | LAERAAAFK              | 20  | 7463   | 0.86 | 0.12 | 14 |
| 7 F01F1.12a;F01F1.12b  | FTDLLIK                | 25  | 1614   | 0.86 | 0.13 | 16 |
| 7 F01F1.12a;F01F1.12b  | LDLGVVPLAGTIGEGTTQGLDK | 36  | 4109   | 0.86 | 0.27 | 31 |
| 7 F01F1.12a;F01F1.12b  | RLDAINLENNETNRQK       | 14  | 8510   | 0.87 | 0.26 | 30 |
| 7 F01F1.12a;F01F1.12b  | RLDAINLENNETNRQK       | 25  | 7691   | 0.87 | 0.11 | 13 |
| 22 F01F1.12a;F01F1.12b | DELHQIALK              | 34  | 4388   | 0.88 | 0.09 | 10 |
| 7 F01F1.12a;F01F1.12b  | YAGEDAAGAAAESLFVAK     | 114 | 3667   | 0.89 | 0.14 | 16 |
| 22 F01F1.12a;F01F1.12b | FTDLLIK                | 12  | 538    | 0.89 | 0.05 | 6  |
| 22 F01F1.12a;F01F1.12b | QGIVPGIK               | 22  | 13676  | 0.89 | 0.17 | 19 |
| 7 F01F1.12a;F01F1.12b  | DELHQIALK              | 15  | 6146   | 0.89 | 0.05 | 6  |
| 22 F01F1.12a;F01F1.12b | RLDAINLENNETNRQK       | 25  | 2264   | 0.91 | 0.21 | 23 |
| 7 F01F1.12a;F01F1.12b  | VTEQVLAFVYK            | 51  | 1665   | 0.92 | 0.13 | 14 |
| 22 F01F1.12a;F01F1.12b | LAERAAAFK              | 14  | 3148   | 0.93 | 0.11 | 12 |
| 22 F01F1.12a;F01F1.12b | RLDAINLENNETNRQK       | 31  | 26962  | 0.93 | 0.17 | 18 |
| 7 F01F1.12a;F01F1.12b  | LDLGVVPLAGTIGEGTTQGLDK | 22  | 2699   | 0.94 | 0.26 | 28 |
| 7 F01F1.12a;F01F1.12b  | LAERAAAFK              | 16  | 3469   | 0.94 | 0.08 | 9  |
| 22 F01F1.12a;F01F1.12b | LAERAAAFK              | 23  | 3800   | 0.94 | 0.09 | 10 |
| 22 F01F1.12a;F01F1.12b | QGIVPGIK               | 27  | 3598   | 0.95 | 0.22 | 23 |
| 22 F01F1.12a;F01F1.12b | RLDAINLENNETNRQK       | 13  | 7908   | 0.95 | 0.19 | 20 |
| 22 F01F1.12a;F01F1.12b | LAERAAAFK              | 23  | 2154   | 0.96 | 0.24 | 26 |
| 22 F01F1.12a;F01F1.12b | LAERAAAFK              | 17  | 4229   | 0.96 | 0.13 | 13 |
| 22 F01F1.12a;F01F1.12b | QGIVPGIK               | 45  | 139764 | 0.96 | 0.05 | 6  |
| 22 F01F1.12a;F01F1.12b | YAGEDAAGAAAESLFVAK     | 120 | 6094   | 0.97 | 0.12 | 13 |
| 22 F01F1.12a;F01F1.12b | RLDAINLENNETNRQK       | 15  | 16923  | 0.97 | 0.20 | 20 |
| 22 F01F1.12a;F01F1.12b | RLDAINLENNETNRQK       | 23  | 11125  | 0.98 | 0.11 | 12 |
| 22 F01F1.12a;F01F1.12b | YAGEDAAGAAAESLFVAK     | 134 | 8485   | 0.99 | 0.10 | 10 |
| 7 F01F1.12a;F01F1.12b  | GILAADESTGTIGK         | 21  | 631    | 1.01 | 0.16 | 15 |
| 22 F01F1.12a;F01F1.12b | QGIVPGIK               | 38  | 175267 | 1.02 | 0.06 | 6  |
| 7 F01F1.12a;F01F1.12b  | RLDAINLENNETNRQK       | 30  | 7432   | 1.02 | 0.11 | 10 |

|                        |                        |     |       |      |      |     |
|------------------------|------------------------|-----|-------|------|------|-----|
| 7 F01F1.12a;F01F1.12b  | LDLGVVPLAGTIGEGTTQGLDK | 78  | 2683  | 1.04 | 0.24 | 23  |
| 22 F01F1.12a;F01F1.12b | DELHQIALK              | 42  | 14206 | 1.04 | 0.10 | 9   |
| 22 F01F1.12a;F01F1.12b | DELHQIALK              | 24  | 6611  | 1.04 | 0.23 | 22  |
| 22 F01F1.12a;F01F1.12b | GILAADESTGTIGK         | 33  | 1100  | 1.06 | 0.18 | 17  |
| 7 F01F1.12a;F01F1.12b  | LAERAAAFK              | 13  | 4619  | 1.07 | 0.13 | 12  |
| 7 F01F1.12a;F01F1.12b  | RLDAINLENNETNRQK       | 33  | 5348  | 1.07 | 0.14 | 13  |
| 7 F01F1.12a;F01F1.12b  | VTEQVLAFVYK            | 53  | 1435  | 1.08 | 0.13 | 12  |
| 22 F01F1.12a;F01F1.12b | RLDAINLENNETNRQK       | 24  | 2616  | 1.09 | 0.11 | 10  |
| 22 F01F1.12a;F01F1.12b | DELHQIALK              | 19  | 9907  | 1.10 | 0.18 | 17  |
| 22 F01F1.12a;F01F1.12b | QGIVPGIK               | 32  | 6304  | 1.10 | 0.22 | 20  |
| 22 F01F1.12a;F01F1.12b | GILAADESTGTIGK         | 68  | 6694  | 1.12 | 0.15 | 13  |
| 7 F01F1.12a;F01F1.12b  | LDLGVVPLAGTIGEGTTQGLDK | 93  | 2364  | 1.13 | 0.10 | 9   |
| 7 F01F1.12a;F01F1.12b  | GILAADESTGTIGK         | 44  | 1354  | 1.14 | 0.13 | 12  |
| 22 F01F1.12a;F01F1.12b | YAGEDAAGAAAESLFVAK     | 16  | 1925  | 1.14 | 0.15 | 13  |
| 22 F01F1.12a;F01F1.12b | RLDAINLENNETNRQK       | 26  | 13275 | 1.14 | 0.17 | 15  |
| 7 F01F1.12a;F01F1.12b  | LAERAAAFK              | 11  | 2834  | 1.15 | 0.15 | 13  |
| 7 F01F1.12a;F01F1.12b  | LAERAAAFK              | 22  | 4610  | 1.16 | 0.13 | 12  |
| 7 F01F1.12a;F01F1.12b  | RLDAINLENNETNRQK       | 32  | 4623  | 1.18 | 0.09 | 8   |
| 22 F01F1.12a;F01F1.12b | YAGEDAAGAAAESLFVAK     | 121 | 4151  | 1.19 | 0.12 | 10  |
| 22 F01F1.12a;F01F1.12b | QGIVPGIK               | 34  | 14283 | 1.20 | 0.18 | 15  |
| 22 F01F1.12a;F01F1.12b | LAERAAAFK              | 23  | 4054  | 1.21 | 0.14 | 12  |
| 22 F01F1.12a;F01F1.12b | LDLGVVPLAGTIGEGTTQGLDK | 16  | 2570  | 1.21 | 0.13 | 11  |
| 7 F01F1.12a;F01F1.12b  | RLDAINLENNETNRQK       | 57  | 14579 | 1.22 | 0.19 | 16  |
| 7 F01F1.12a;F01F1.12b  | YAGEDAAGAAAESLFVAK     | 113 | 2867  | 1.23 | 0.12 | 10  |
| 22 F01F1.12a;F01F1.12b | LDLGVVPLAGTIGEGTTQGLDK | 39  | 4969  | 1.23 | 0.07 | 5   |
| 22 F01F1.12a;F01F1.12b | LDLGVVPLAGTIGEGTTQGLDK | 80  | 2832  | 1.23 | 0.13 | 10  |
| 22 F01F1.12a;F01F1.12b | VTEQVLAFVYK            | 58  | 2080  | 1.24 | 0.10 | 8   |
| 22 F01F1.12a;F01F1.12b | YAGEDAAGAAAESLFVAK     | 151 | 6184  | 1.25 | 0.10 | 8   |
| 7 F01F1.12a;F01F1.12b  | YAGEDAAGAAAESLFVAK     | 127 | 2559  | 1.26 | 0.15 | 12  |
| 22 F01F1.12a;F01F1.12b | LDLGVVPLAGTIGEGTTQGLDK | 83  | 3571  | 1.27 | 0.10 | 8   |
| 7 F01F1.12a;F01F1.12b  | QGIVPGIK               | 18  | 9554  | 1.29 | 0.26 | 20  |
| 22 F01F1.12a;F01F1.12b | RLDAINLENNETNRQK       | 26  | 6683  | 1.30 | 0.19 | 15  |
| 22 F01F1.12a;F01F1.12b | QGIVPGIK               | 15  | 3307  | 1.31 | 0.17 | 13  |
| 7 F01F1.12a;F01F1.12b  | VTEQVLAFVYK            | 16  | 518   | 1.34 | 0.07 | 5   |
| 22 F01F1.12a;F01F1.12b | GILAADESTGTIGK         | 46  | 1155  | 1.34 | 0.13 | 9   |
| 22 F01F1.12a;F01F1.12b | RLDAINLENNETNRQK       | 20  | 7646  | 1.40 | 0.20 | 14  |
| 7 F01F1.12a;F01F1.12b  | DELHQIALK              | 46  | 12501 | 1.41 | 0.10 | 7   |
| 22 F01F1.12a;F01F1.12b | VTEQVLAFVYK            | 50  | 1595  | 1.44 | 0.12 | 9   |
| 22 F01F1.12a;F01F1.12b | GILAADESTGTIGK         | 61  | 2604  | 1.50 | 0.13 | 9   |
| 7 F01F1.12a;F01F1.12b  | VTEQVLAFVYK            | 42  | 1281  | 1.51 | 0.12 | 8   |
| 7 F01F1.12a;F01F1.12b  | FTDLLIK                | 25  | 1183  | 1.52 | 0.16 | 10  |
| 7 F01F1.12a;F01F1.12b  | DELHQIALK              | 28  | 9577  | 1.53 | 0.07 | 4   |
| 22 F01F1.12a;F01F1.12b | RLDAINLENNETNRQK       | 25  | 5894  | 1.55 | 0.11 | 7   |
| 22 F01F1.12a;F01F1.12b | RLDAINLENNETNRQK       | 22  | 8389  | 1.56 | 0.18 | 11  |
| 7 F01F1.12a;F01F1.12b  | QGIVPGIK               | 34  | 9602  | 1.59 | 0.14 | 9   |
| 7 F01F1.12a;F01F1.12b  | GILAADESTGTIGK         | 38  | 1507  | 1.61 | 0.20 | 13  |
| 22 F01F1.12a;F01F1.12b | RLDAINLENNETNRQK       | 28  | 20318 | 1.66 | 0.14 | 9   |
| 7 F01F1.12a;F01F1.12b  | YAGEDAAGAAAESLFVAK     | 113 | 3498  | 1.67 | 0.14 | 9   |
| 22 F01F1.12a;F01F1.12b | QGIVPGIK               | 34  | 11735 | 1.67 | 0.14 | 9   |
| 7 F01F1.12a;F01F1.12b  | FTDLLIK                | 57  | 5080  | 1.68 | 0.08 | 5   |
| 22 F01F1.12a;F01F1.12b | FTDLLIK                | 31  | 852   | 1.68 | 0.12 | 7   |
| 7 F01F1.12a;F01F1.12b  | YAGEDAAGAAAESLFVAK     | 153 | 7598  | 1.71 | 0.12 | 7   |
| 22 F01F1.12a;F01F1.12b | GILAADESTGTIGK         | 24  | 665   | 1.75 | 0.19 | 11  |
| 22 F01F1.12a;F01F1.12b | QGIVPGIK               | 15  | 7308  | 1.80 | 0.18 | 10  |
| 22 F01F1.12a;F01F1.12b | RLDAINLENNETNRQK       | 18  | 12737 | 1.84 | 0.13 | 7   |
| 22 F01F1.12a;F01F1.12b | FTDLLIK                | 13  | 623   | 1.95 | 0.11 | 6   |
| 7 F01F1.12a;F01F1.12b  | GILAADESTGTIGK         | 31  | 1653  | 1.96 | 0.30 | 15  |
| 22 F01F1.12a;F01F1.12b | GILAADESTGTIGK         | 19  | 1487  | 1.99 | 0.20 | 10  |
| 22 F01F1.12a;F01F1.12b | GILAADESTGTIGK         | 27  | 975   | 2.03 | 0.15 | 7   |
| 7 F01F1.12a;F01F1.12b  | VTEQVLAFVYK            | 55  | 1277  | 2.13 | 0.13 | 6   |
| 22 F01F1.12a;F01F1.12b | GILAADESTGTIGK         | 55  | 3978  | 2.14 | 0.11 | 5   |
| 7 F01F1.12a;F01F1.12b  | RLDAINLENNETNRQK       | 13  | 11352 | 2.15 | 0.18 | 8   |
| 7 F01F1.12a;F01F1.12b  | VTEQVLAFVYK            | 55  | 1332  | 2.24 | 0.10 | 4   |
| 22 F01F1.12a;F01F1.12b | DELHQIALK              | 16  | 1312  | 2.33 | 0.39 | 17  |
| 7 F01F1.12a;F01F1.12b  | QGIVPGIK               | 14  | 5826  | 2.42 | 0.20 | 8   |
| 7 F01F1.12a;F01F1.12b  | RLDAINLENNETNRQK       | 23  | 2322  | 2.52 | 0.30 | 12  |
| 7 F01F1.12a;F01F1.12b  | LAERAAAFK              | 16  | 2153  | 3.14 | 0.04 | 1   |
| 22 F01F1.12a;F01F1.12b | FTDLLIK                | 20  | 756   | 3.19 | 0.10 | 3   |
| 7 F01F1.12a;F01F1.12b  | QGIVPGIK               | 17  | 2900  | 3.46 | 0.12 | 4   |
| 7 F01F1.12a;F01F1.12b  | GILAADESTGTIGK         | 26  | 1742  | 3.64 | 0.19 | 5   |
| 7 F01F1.12a;F01F1.12b  | QGIVPGIK               | 15  | 2621  | 4.43 | 0.21 | 5   |
| 7 F01F1.12a;F01F1.12b  | DELHQIALK              | 40  | 3695  | 4.74 | 0.12 | 3   |
| 7 F01F1.12a;F01F1.12b  | DELHQIALK              | 19  | 3595  | 5.08 | 0.14 | 3   |
| 7 F01F1.12a;F01F1.12b  | GILAADESTGTIGK         | 10  | 2127  | 5.82 | 0.23 | 4   |
| 7 F01F1.15             | LVVNTITGK              | 26  | 971   | 1.26 | 0.09 | 7   |
| 1 F01F1.15             | SVYVHNDATHLK           | 26  | 10285 | 1.50 | 0.30 | 20  |
| 22 F01F1.15            | SVYVHNDATHLK           | 15  | 18062 | 2.25 | 0.09 | 4   |
| 10 F01F1.15            | SVYVHNDATHLK           | 15  | 11406 | 2.42 | 0.19 | 8   |
| 7 F01F1.6              | ELGLTENNAGVFHGK        | 47  | 1936  | 0.18 | 0.39 | 218 |
| 22 F01F1.6             | VLERDGNFVLPTIVTGLK     | 11  | 653   | 0.29 | 0.35 | 121 |
| 7 F01F1.6              | VLERDGNFVLPTIVTGLK     | 23  | 1687  | 0.34 | 0.31 | 92  |
| 1 F01F1.6              | IVGQQVQARFGK           | 25  | 2473  | 0.40 | 0.15 | 38  |
| 22 F01F1.6             | ELGLTENNAGVFHGK        | 59  | 4257  | 0.42 | 0.11 | 25  |
| 10 F01F1.6             | HDSPVVLRETFAPILYVLK    | 15  | 1953  | 0.42 | 0.13 | 31  |
| 1 F01F1.6              | IVGQQVQARFGK           | 43  | 3112  | 0.44 | 0.15 | 35  |
| 10 F01F1.6             | ASVAEAVASGGK           | 58  | 6687  | 0.47 | 0.24 | 51  |
| 7 F01F1.6              | LRTQLQNLGK             | 15  | 1897  | 0.49 | 0.23 | 46  |
| 7 F01F1.6              | ASVAEAVASGGK           | 41  | 4001  | 0.49 | 0.13 | 26  |
| 7 F01F1.6              | ASVAEAVASGGK           | 41  | 4046  | 0.49 | 0.25 | 51  |
| 10 F01F1.6             | VLERDGNFVLPTIVTGLK     | 41  | 1170  | 0.50 | 0.31 | 62  |
| 1 F01F1.6              | VYDQVLERLK             | 22  | 1289  | 0.51 | 0.14 | 27  |
| 10 F01F1.6             | ASVAEAVASGGK           | 35  | 8199  | 0.52 | 0.12 | 23  |
| 7 F01F1.6              | RVNLVSFTGSSEIGK        | 23  | 653   | 0.53 | 0.16 | 31  |
| 10 F01F1.6             | VLERDGNFVLPTIVTGLK     | 13  | 818   | 0.54 | 0.11 | 21  |
| 10 F01F1.6             | ELGLTENNAGVFHGK        | 78  | 5823  | 0.55 | 0.10 | 18  |
| 22 F01F1.6             | VLERDGNFVLPTIVTGLK     | 21  | 2539  | 0.55 | 0.16 | 30  |
| 22 F01F1.6             | ELGLTENNAGVFHGK        | 61  | 7134  | 0.56 | 0.08 | 14  |
| 22 F01F1.6             | RVNLVSFTGSSEIGK        | 26  | 3173  | 0.57 | 0.22 | 38  |
| 1 F01F1.6              | ASVAEAVASGGK           | 58  | 3596  | 0.58 | 0.07 | 12  |
| 7 F01F1.6              | LRTQLQNLGK             | 17  | 1279  | 0.58 | 0.09 | 16  |
| 10 F01F1.6             | ASVAEAVASGGK           | 56  | 5425  | 0.59 | 0.27 | 46  |

|            |                     |    |      |      |      |    |
|------------|---------------------|----|------|------|------|----|
| 10 F01F1.6 | ASVAEAVASGGK        | 34 | 5220 | 0.60 | 0.37 | 61 |
| 22 F01F1.6 | VLERDGNFVLPTIVTGLK  | 23 | 2983 | 0.61 | 0.15 | 25 |
| 10 F01F1.6 | VYDQVLERLK          | 10 | 2143 | 0.61 | 0.12 | 20 |
| 7 F01F1.6  | RVNLVSFTGSSEIGK     | 25 | 500  | 0.61 | 0.12 | 19 |
| 22 F01F1.6 | RVNLVSFTGSSEIGK     | 59 | 1849 | 0.61 | 0.22 | 36 |
| 22 F01F1.6 | ELGLTENNAGVFH GK    | 85 | 7669 | 0.61 | 0.09 | 14 |
| 7 F01F1.6  | ASVAEAVASGGK        | 17 | 1412 | 0.63 | 0.03 | 5  |
| 22 F01F1.6 | ELGLTENNAGVFH GK    | 59 | 3359 | 0.64 | 0.22 | 35 |
| 10 F01F1.6 | HDSPVVLRETFAPILYVLK | 19 | 1980 | 0.65 | 0.16 | 24 |
| 22 F01F1.6 | ASVAEAVASGGK        | 27 | 3527 | 0.65 | 0.10 | 16 |
| 22 F01F1.6 | VYDQVLERLK          | 35 | 2732 | 0.66 | 0.25 | 38 |
| 1 F01F1.6  | IVGQQVQARFGK        | 31 | 3773 | 0.67 | 0.12 | 18 |
| 10 F01F1.6 | LRTQLQNLGK          | 16 | 711  | 0.67 | 0.11 | 16 |
| 7 F01F1.6  | RVNLVSFTGSSEIGK     | 41 | 1790 | 0.67 | 0.16 | 24 |
| 1 F01F1.6  | ELGLTENNAGVFH GK    | 90 | 5607 | 0.68 | 0.07 | 10 |
| 1 F01F1.6  | LVSLEM GK           | 16 | 1056 | 0.69 | 0.19 | 28 |
| 22 F01F1.6 | ASVAEAVASGGK        | 39 | 7940 | 0.69 | 0.23 | 34 |
| 7 F01F1.6  | ASVAEAVASGGK        | 19 | 1720 | 0.69 | 0.15 | 21 |
| 22 F01F1.6 | ELGLTENNAGVFH GK    | 79 | 6031 | 0.70 | 0.03 | 5  |
| 10 F01F1.6 | ELGLTENNAGVFH GK    | 83 | 5340 | 0.71 | 0.09 | 12 |
| 22 F01F1.6 | ELGLTENNAGVFH GK    | 44 | 2403 | 0.71 | 0.11 | 16 |
| 7 F01F1.6  | ASVAEAVASGGK        | 41 | 1543 | 0.72 | 0.48 | 67 |
| 7 F01F1.6  | IVGQQVQARFGK        | 30 | 3878 | 0.72 | 0.16 | 22 |
| 10 F01F1.6 | VYDQVLERLK          | 18 | 1341 | 0.73 | 0.22 | 31 |
| 22 F01F1.6 | LRTQLQNLGK          | 12 | 463  | 0.73 | 0.22 | 30 |
| 7 F01F1.6  | ASVAEAVASGGK        | 47 | 4505 | 0.73 | 0.12 | 16 |
| 22 F01F1.6 | ASVAEAVASGGK        | 32 | 6572 | 0.73 | 0.20 | 27 |
| 10 F01F1.6 | IVGQQVQARFGK        | 26 | 3418 | 0.74 | 0.09 | 12 |
| 22 F01F1.6 | ASVAEAVASGGK        | 50 | 4770 | 0.74 | 0.26 | 35 |
| 1 F01F1.6  | IVGQQVQARFGK        | 26 | 4174 | 0.74 | 0.14 | 20 |
| 22 F01F1.6 | VYDQVLERLK          | 12 | 2376 | 0.74 | 0.24 | 32 |
| 7 F01F1.6  | IVGQQVQARFGK        | 24 | 1579 | 0.74 | 0.28 | 38 |
| 10 F01F1.6 | LRTQLQNLGK          | 26 | 793  | 0.75 | 0.23 | 31 |
| 10 F01F1.6 | RVNLVSFTGSSEIGK     | 21 | 3663 | 0.75 | 0.24 | 32 |
| 22 F01F1.6 | VYDQVLERLK          | 13 | 1380 | 0.75 | 0.35 | 47 |
| 10 F01F1.6 | VLERDGNFVLPTIVTGLK  | 13 | 2244 | 0.76 | 0.07 | 9  |
| 10 F01F1.6 | ASVAEAVASGGK        | 39 | 5756 | 0.77 | 0.11 | 14 |
| 22 F01F1.6 | IVGQQVQARFGK        | 22 | 3995 | 0.78 | 0.09 | 12 |
| 22 F01F1.6 | IVGQQVQARFGK        | 35 | 3438 | 0.79 | 0.15 | 19 |
| 7 F01F1.6  | VYDQVLERLK          | 21 | 1882 | 0.79 | 0.27 | 34 |
| 10 F01F1.6 | VYDQVLERLK          | 12 | 2219 | 0.80 | 0.23 | 29 |
| 7 F01F1.6  | ASVAEAVASGGK        | 70 | 6777 | 0.81 | 0.24 | 30 |
| 10 F01F1.6 | VLERDGNFVLPTIVTGLK  | 13 | 1818 | 0.81 | 0.11 | 13 |
| 7 F01F1.6  | IVGQQVQARFGK        | 25 | 3231 | 0.81 | 0.17 | 21 |
| 10 F01F1.6 | ASVAEAVASGGK        | 34 | 5657 | 0.82 | 0.07 | 9  |
| 10 F01F1.6 | VYDQVLERLK          | 16 | 2232 | 0.83 | 0.17 | 20 |
| 10 F01F1.6 | RVNLVSFTGSSEIGK     | 23 | 4233 | 0.83 | 0.15 | 17 |
| 22 F01F1.6 | RVNLVSFTGSSEIGK     | 67 | 2915 | 0.84 | 0.15 | 18 |
| 22 F01F1.6 | ELGLTENNAGVFH GK    | 63 | 2775 | 0.84 | 0.15 | 18 |
| 22 F01F1.6 | RVNLVSFTGSSEIGK     | 86 | 3253 | 0.84 | 0.15 | 17 |
| 22 F01F1.6 | ELGLTENNAGVFH GK    | 97 | 7111 | 0.84 | 0.05 | 6  |
| 10 F01F1.6 | ASVAEAVASGGK        | 62 | 4553 | 0.85 | 0.18 | 22 |
| 1 F01F1.6  | VLERDGNFVLPTIVTGLK  | 17 | 972  | 0.85 | 0.26 | 30 |
| 10 F01F1.6 | ASVAEAVASGGK        | 35 | 4699 | 0.85 | 0.06 | 7  |
| 1 F01F1.6  | VLERDGNFVLPTIVTGLK  | 45 | 793  | 0.87 | 0.13 | 15 |
| 10 F01F1.6 | RVNLVSFTGSSEIGK     | 37 | 3050 | 0.87 | 0.11 | 13 |
| 1 F01F1.6  | ELGLTENNAGVFH GK    | 72 | 5249 | 0.88 | 0.14 | 16 |
| 1 F01F1.6  | ASVAEAVASGGK        | 45 | 3480 | 0.88 | 0.11 | 13 |
| 22 F01F1.6 | ELGLTENNAGVFH GK    | 54 | 6288 | 0.88 | 0.10 | 11 |
| 22 F01F1.6 | LRTQLQNLGK          | 39 | 5250 | 0.89 | 0.17 | 19 |
| 7 F01F1.6  | IVGQQVQARFGK        | 26 | 2515 | 0.89 | 0.04 | 5  |
| 1 F01F1.6  | ELGLTENNAGVFH GK    | 19 | 1299 | 0.89 | 0.15 | 17 |
| 10 F01F1.6 | ASVAEAVASGGK        | 29 | 5824 | 0.89 | 0.05 | 6  |
| 22 F01F1.6 | ASVAEAVASGGK        | 33 | 4120 | 0.90 | 0.18 | 20 |
| 10 F01F1.6 | RVNLVSFTGSSEIGK     | 43 | 3277 | 0.90 | 0.10 | 11 |
| 7 F01F1.6  | ASVAEAVASGGK        | 67 | 8012 | 0.90 | 0.20 | 22 |
| 1 F01F1.6  | RVNLVSFTGSSEIGK     | 47 | 2049 | 0.91 | 0.11 | 12 |
| 10 F01F1.6 | LRTQLQNLGK          | 24 | 2203 | 0.91 | 0.13 | 14 |
| 7 F01F1.6  | ELGLTENNAGVFH GK    | 61 | 5768 | 0.91 | 0.19 | 21 |
| 22 F01F1.6 | RVNLVSFTGSSEIGK     | 39 | 1942 | 0.93 | 0.08 | 8  |
| 1 F01F1.6  | ELGLTENNAGVFH GK    | 52 | 1262 | 0.94 | 0.11 | 12 |
| 22 F01F1.6 | RVNLVSFTGSSEIGK     | 56 | 1068 | 0.95 | 0.18 | 19 |
| 10 F01F1.6 | RVNLVSFTGSSEIGK     | 26 | 7277 | 0.95 | 0.19 | 20 |
| 7 F01F1.6  | RVNLVSFTGSSEIGK     | 32 | 1545 | 0.95 | 0.16 | 16 |
| 22 F01F1.6 | IVGQQVQARFGK        | 34 | 4376 | 0.96 | 0.10 | 11 |
| 22 F01F1.6 | ELGLTENNAGVFH GK    | 79 | 5307 | 0.96 | 0.13 | 14 |
| 1 F01F1.6  | ELGLTENNAGVFH GK    | 75 | 1716 | 0.96 | 0.15 | 16 |
| 1 F01F1.6  | LRTQLQNLGK          | 22 | 1439 | 0.96 | 0.31 | 32 |
| 10 F01F1.6 | ELGLTENNAGVFH GK    | 72 | 8345 | 0.97 | 0.11 | 12 |
| 10 F01F1.6 | IVGQQVQARFGK        | 20 | 6973 | 0.97 | 0.08 | 8  |
| 22 F01F1.6 | IVGQQVQARFGK        | 24 | 3735 | 0.98 | 0.08 | 8  |
| 10 F01F1.6 | ASVAEAVASGGK        | 31 | 5216 | 0.99 | 0.11 | 11 |
| 10 F01F1.6 | RVNLVSFTGSSEIGK     | 78 | 3455 | 1.00 | 0.11 | 11 |
| 22 F01F1.6 | ASVAEAVASGGK        | 26 | 3270 | 1.00 | 0.09 | 9  |
| 22 F01F1.6 | RVNLVSFTGSSEIGK     | 47 | 2029 | 1.01 | 0.18 | 18 |
| 10 F01F1.6 | RVNLVSFTGSSEIGK     | 54 | 3258 | 1.01 | 0.09 | 9  |
| 1 F01F1.6  | LVSLEM GK           | 16 | 1257 | 1.03 | 0.18 | 18 |
| 7 F01F1.6  | ASVAEAVASGGK        | 70 | 6879 | 1.03 | 0.17 | 17 |
| 22 F01F1.6 | ASVAEAVASGGK        | 52 | 8461 | 1.03 | 0.09 | 9  |
| 1 F01F1.6  | RVNLVSFTGSSEIGK     | 36 | 2065 | 1.04 | 0.17 | 17 |
| 7 F01F1.6  | ASVAEAVASGGK        | 40 | 1097 | 1.04 | 0.55 | 53 |
| 1 F01F1.6  | RVNLVSFTGSSEIGK     | 46 | 1246 | 1.04 | 0.15 | 14 |
| 1 F01F1.6  | RVNLVSFTGSSEIGK     | 17 | 800  | 1.05 | 0.17 | 16 |
| 7 F01F1.6  | ASVAEAVASGGK        | 48 | 5317 | 1.05 | 0.12 | 12 |
| 7 F01F1.6  | ASVAEAVASGGK        | 76 | 5799 | 1.07 | 0.30 | 28 |
| 10 F01F1.6 | ELGLTENNAGVFH GK    | 11 | 4947 | 1.07 | 0.14 | 13 |
| 1 F01F1.6  | ASVAEAVASGGK        | 64 | 4289 | 1.07 | 0.13 | 12 |
| 22 F01F1.6 | ASVAEAVASGGK        | 49 | 8787 | 1.07 | 0.13 | 12 |
| 10 F01F1.6 | VLERDGNFVLPTIVTGLK  | 15 | 1514 | 1.08 | 0.16 | 15 |
| 22 F01F1.6 | ASVAEAVASGGK        | 31 | 1918 | 1.09 | 0.18 | 16 |
| 7 F01F1.6  | RVNLVSFTGSSEIGK     | 52 | 2103 | 1.09 | 0.17 | 15 |

|                      |                        |     |       |      |      |    |
|----------------------|------------------------|-----|-------|------|------|----|
| 10 F01F1.6           | VLERDGNFVLPTIVTGLK     | 43  | 942   | 1.10 | 0.27 | 24 |
| 10 F01F1.6           | RVNLVSFTGSSEIGK        | 101 | 4375  | 1.10 | 0.09 | 9  |
| 10 F01F1.6           | VLERDGNFVLPTIVTGLK     | 12  | 1490  | 1.10 | 0.17 | 15 |
| 22 F01F1.6           | IVGQQVQARFGK           | 12  | 1021  | 1.11 | 0.09 | 8  |
| 22 F01F1.6           | RVNLVSFTGSSEIGK        | 49  | 800   | 1.12 | 0.16 | 14 |
| 1 F01F1.6            | IVGQQVQARFGK           | 37  | 2601  | 1.13 | 0.10 | 9  |
| 10 F01F1.6           | LRTQLQNLGK             | 63  | 5476  | 1.13 | 0.16 | 14 |
| 1 F01F1.6            | IVGQQVQARFGK           | 20  | 1817  | 1.16 | 0.19 | 17 |
| 22 F01F1.6           | RVNLVSFTGSSEIGK        | 89  | 2612  | 1.17 | 0.12 | 11 |
| 22 F01F1.6           | IVGQQVQARFGK           | 33  | 4380  | 1.17 | 0.09 | 8  |
| 10 F01F1.6           | ELGLTENNAGVFH GK       | 92  | 9951  | 1.17 | 0.08 | 7  |
| 1 F01F1.6            | ELGLTENNAGVFH GK       | 39  | 2654  | 1.18 | 0.13 | 11 |
| 1 F01F1.6            | LVSLEM GK              | 24  | 816   | 1.18 | 0.07 | 6  |
| 7 F01F1.6            | ELGLTENNAGVFH GK       | 58  | 3679  | 1.19 | 0.10 | 8  |
| 10 F01F1.6           | IVGQQVQARFGK           | 23  | 3915  | 1.20 | 0.11 | 9  |
| 1 F01F1.6            | ASVAEAVASG GK          | 22  | 1705  | 1.20 | 0.11 | 9  |
| 7 F01F1.6            | RVNLVSFTGSSEIGK        | 52  | 2199  | 1.21 | 0.22 | 18 |
| 22 F01F1.6           | RVNLVSFTGSSEIGK        | 58  | 2332  | 1.22 | 0.11 | 9  |
| 10 F01F1.6           | IVGQQVQARFGK           | 26  | 2745  | 1.22 | 0.16 | 13 |
| 10 F01F1.6           | ASVAEAVASG GK          | 86  | 11625 | 1.22 | 0.16 | 13 |
| 7 F01F1.6            | ASVAEAVASG GK          | 58  | 5034  | 1.23 | 0.12 | 10 |
| 1 F01F1.6            | RVNLVSFTGSSEIGK        | 17  | 757   | 1.23 | 0.16 | 13 |
| 1 F01F1.6            | LRTQLQNLGK             | 29  | 1684  | 1.24 | 0.22 | 18 |
| 22 F01F1.6           | IVGQQVQARFGK           | 32  | 3624  | 1.25 | 0.12 | 9  |
| 10 F01F1.6           | RVNLVSFTGSSEIGK        | 15  | 5145  | 1.26 | 0.13 | 10 |
| 10 F01F1.6           | VLERDGNFVLPTIVTGLK     | 14  | 1147  | 1.26 | 0.14 | 11 |
| 22 F01F1.6           | LRTQLQNLGK             | 28  | 1671  | 1.27 | 0.16 | 12 |
| 10 F01F1.6           | ASVAEAVASG GK          | 64  | 9240  | 1.28 | 0.14 | 11 |
| 7 F01F1.6            | ELGLTENNAGVFH GK       | 74  | 6705  | 1.29 | 0.14 | 11 |
| 7 F01F1.6            | RVNLVSFTGSSEIGK        | 34  | 3195  | 1.32 | 0.09 | 7  |
| 7 F01F1.6            | ELGLTENNAGVFH GK       | 66  | 4561  | 1.34 | 0.14 | 10 |
| 22 F01F1.6           | LRTQLQNLGK             | 43  | 3110  | 1.34 | 0.17 | 13 |
| 22 F01F1.6           | ASVAEAVASG GK          | 21  | 2790  | 1.35 | 0.23 | 17 |
| 7 F01F1.6            | ELGLTENNAGVFH GK       | 10  | 4959  | 1.38 | 0.28 | 21 |
| 1 F01F1.6            | LVSLEM GK              | 41  | 1124  | 1.40 | 0.20 | 15 |
| 1 F01F1.6            | IVGQQVQARFGK           | 26  | 2234  | 1.42 | 0.21 | 15 |
| 22 F01F1.6           | IVGQQVQARFGK           | 34  | 2513  | 1.44 | 0.26 | 18 |
| 1 F01F1.6            | ASVAEAVASG GK          | 67  | 3703  | 1.44 | 0.05 | 4  |
| 1 F01F1.6            | LRTQLQNLGK             | 26  | 1651  | 1.45 | 0.17 | 11 |
| 22 F01F1.6           | ASVAEAVASG GK          | 57  | 6275  | 1.46 | 0.07 | 5  |
| 22 F01F1.6           | VLERDGNFVLPTIVTGLK     | 14  | 1163  | 1.49 | 0.10 | 7  |
| 10 F01F1.6           | RVNLVSFTGSSEIGK        | 70  | 3180  | 1.50 | 0.09 | 6  |
| 1 F01F1.6            | ELGLTENNAGVFH GK       | 75  | 3399  | 1.50 | 0.11 | 7  |
| 1 F01F1.6            | ELGLTENNAGVFH GK       | 85  | 3009  | 1.52 | 0.08 | 5  |
| 22 F01F1.6           | IVGQQVQARFGK           | 21  | 2720  | 1.53 | 0.12 | 8  |
| 1 F01F1.6            | ASVAEAVASG GK          | 56  | 3949  | 1.57 | 0.18 | 11 |
| 1 F01F1.6            | LRTQLQNLGK             | 36  | 1079  | 1.58 | 0.34 | 21 |
| 1 F01F1.6            | ELGLTENNAGVFH GK       | 55  | 1148  | 1.58 | 0.09 | 5  |
| 10 F01F1.6           | ELGLTENNAGVFH GK       | 88  | 4381  | 1.58 | 0.09 | 5  |
| 7 F01F1.6            | ELGLTENNAGVFH GK       | 75  | 4662  | 1.65 | 0.07 | 4  |
| 10 F01F1.6           | LRTQLQNLGK             | 15  | 2319  | 1.72 | 0.09 | 5  |
| 1 F01F1.6            | ASVAEAVASG GK          | 70  | 3173  | 1.72 | 0.13 | 7  |
| 7 F01F1.6            | IVGQQVQARFGK           | 16  | 2414  | 1.98 | 0.20 | 10 |
| 1 F01F1.6            | ELGLTENNAGVFH GK       | 61  | 2606  | 2.02 | 0.09 | 5  |
| 7 F01F1.6            | LRTQLQNLGK             | 19  | 926   | 2.05 | 0.15 | 7  |
| 7 F01F1.6            | LRTQLQNLGK             | 34  | 1508  | 2.23 | 0.20 | 9  |
| 10 F01F1.6           | ELGLTENNAGVFH GK       | 75  | 3911  | 2.24 | 0.10 | 4  |
| 10 F01F1.6           | LRTQLQNLGK             | 10  | 2561  | 2.46 | 0.25 | 10 |
| 10 F01F1.6           | LRTQLQNLGK             | 33  | 2010  | 2.97 | 0.26 | 9  |
| 10 F01F1.6           | LRTQLQNLGK             | 36  | 1858  | 3.24 | 0.31 | 10 |
| 10 F01F1.6           | ASVAEAVASG GK          | 54  | 5906  | 3.43 | 0.17 | 5  |
| 10 F01F1.6           | IVGQQVQARFGK           | 28  | 3631  | 3.47 | 0.09 | 3  |
| 10 F01F1.6           | RVNLVSFTGSSEIGK        | 49  | 1622  | 3.53 | 0.16 | 5  |
| 10 F01F1.6           | RVNLVSFTGSSEIGK        | 62  | 1508  | 3.79 | 0.12 | 3  |
| 10 F01F1.6           | IVGQQVQARFGK           | 24  | 2121  | 4.53 | 0.11 | 2  |
| 22 F01F1.8a;F01F1.8b | DGNVLLHEMAIQHPTASMI AK | 17  | 3214  | 0.33 | 0.11 | 34 |
| 22 F01F1.8a;F01F1.8b | DAIHDGLRAVFNTIVDK      | 11  | 1546  | 0.41 | 0.10 | 23 |
| 10 F01F1.8a;F01F1.8b | TLELLEK                | 44  | 4255  | 0.51 | 0.15 | 29 |
| 10 F01F1.8a;F01F1.8b | TLELLEK                | 49  | 4024  | 0.54 | 0.17 | 31 |
| 7 F01F1.8a;F01F1.8b  | MLVSGAGDIK             | 27  | 2410  | 0.54 | 0.30 | 55 |
| 7 F01F1.8a;F01F1.8b  | MLVSGAGDIK             | 25  | 2029  | 0.56 | 0.04 | 7  |
| 1 F01F1.8a;F01F1.8b  | MLVSGAGDIK             | 25  | 5640  | 0.72 | 0.22 | 31 |
| 1 F01F1.8a;F01F1.8b  | TLAVNGGYDAQETLVK       | 49  | 750   | 0.74 | 0.15 | 21 |
| 1 F01F1.8a;F01F1.8b  | MLVSGAGDIK             | 26  | 5146  | 0.75 | 0.18 | 23 |
| 1 F01F1.8a;F01F1.8b  | MLVSGAGDIK             | 25  | 6572  | 0.77 | 0.34 | 44 |
| 7 F01F1.8a;F01F1.8b  | TLELLEK                | 21  | 2195  | 0.80 | 0.21 | 26 |
| 1 F01F1.8a;F01F1.8b  | MLVSGAGDIK             | 14  | 5988  | 0.83 | 0.14 | 16 |
| 22 F01F1.8a;F01F1.8b | TLAVNGGYDAQETLVK       | 51  | 1319  | 0.86 | 0.15 | 18 |
| 22 F01F1.8a;F01F1.8b | TLELLEK                | 45  | 4507  | 0.90 | 0.09 | 10 |
| 22 F01F1.8a;F01F1.8b | MLVSGAGDIK             | 26  | 3490  | 0.97 | 0.10 | 11 |
| 7 F01F1.8a;F01F1.8b  | TLAVNGGYDAQETLVK       | 90  | 3078  | 1.06 | 0.26 | 25 |
| 7 F01F1.8a;F01F1.8b  | TLAVNGGYDAQETLVK       | 95  | 5532  | 1.06 | 0.14 | 13 |
| 22 F01F1.8a;F01F1.8b | MLVSGAGDIK             | 47  | 4261  | 1.08 | 0.17 | 16 |
| 7 F01F1.8a;F01F1.8b  | MLVSGAGDIK             | 31  | 3941  | 1.09 | 0.11 | 10 |
| 10 F01F1.8a;F01F1.8b | SVTLLIK                | 39  | 961   | 1.14 | 0.12 | 11 |
| 22 F01F1.8a;F01F1.8b | HTITQIK                | 29  | 9476  | 1.26 | 0.08 | 7  |
| 1 F01F1.8a;F01F1.8b  | HTITQIK                | 12  | 2388  | 1.27 | 0.11 | 8  |
| 7 F01F1.8a;F01F1.8b  | MLVSGAGDIK             | 44  | 6838  | 1.29 | 0.04 | 3  |
| 22 F01F1.8a;F01F1.8b | MLVSGAGDIK             | 12  | 1922  | 1.31 | 0.25 | 19 |
| 22 F01F1.8a;F01F1.8b | GFVVINQK               | 16  | 5147  | 1.38 | 0.13 | 10 |
| 1 F01F1.8a;F01F1.8b  | HTITQIK                | 13  | 3196  | 1.40 | 0.12 | 9  |
| 10 F01F1.8a;F01F1.8b | SVTLLIK                | 10  | 837   | 1.43 | 0.19 | 13 |
| 1 F01F1.8a;F01F1.8b  | HTITQIK                | 17  | 2260  | 1.49 | 0.14 | 9  |
| 7 F01F1.8a;F01F1.8b  | MLVSGAGDIK             | 51  | 3546  | 1.53 | 0.11 | 7  |
| 7 F01F1.8a;F01F1.8b  | TEVNSGLFYK             | 16  | 3389  | 1.53 | 0.19 | 13 |
| 7 F01F1.8a;F01F1.8b  | MLVSGAGDIK             | 46  | 11044 | 1.59 | 0.15 | 9  |
| 10 F01F1.8a;F01F1.8b | HTITQIK                | 12  | 3875  | 1.61 | 0.12 | 8  |
| 22 F01F1.8a;F01F1.8b | MLVSGAGDIK             | 27  | 8668  | 1.64 | 0.32 | 19 |
| 7 F01F1.8a;F01F1.8b  | MLVSGAGDIK             | 55  | 12067 | 1.65 | 0.14 | 9  |
| 1 F01F1.8a;F01F1.8b  | HTITQIK                | 17  | 3291  | 1.65 | 0.18 | 11 |
| 7 F01F1.8a;F01F1.8b  | HTITQIK                | 15  | 1910  | 1.73 | 0.19 | 11 |

|                      |                             |     |       |      |      |     |
|----------------------|-----------------------------|-----|-------|------|------|-----|
| 22 F01F1.8a;F01F1.8b | MLVSGAGDIK                  | 55  | 7331  | 1.82 | 0.13 | 7   |
| 10 F01F1.8a;F01F1.8b | HTITQIK                     | 19  | 2778  | 1.82 | 0.14 | 8   |
| 22 F01F1.8a;F01F1.8b | MLVSGAGDIK                  | 11  | 8529  | 1.94 | 0.17 | 9   |
| 22 F01F1.8a;F01F1.8b | HTITQIK                     | 10  | 2879  | 1.95 | 0.10 | 5   |
| 10 F01F1.8a;F01F1.8b | SVTLLIK                     | 10  | 448   | 2.13 | 0.15 | 7   |
| 7 F01F1.8a;F01F1.8b  | HTITQIK                     | 14  | 4221  | 2.14 | 0.12 | 6   |
| 7 F01F1.8a;F01F1.8b  | MLVSGAGDIK                  | 44  | 7639  | 2.14 | 0.11 | 5   |
| 7 F01F1.8a;F01F1.8b  | HTITQIK                     | 13  | 1746  | 2.26 | 0.10 | 4   |
| 7 F01F1.8a;F01F1.8b  | HTITQIK                     | 33  | 7186  | 2.29 | 0.07 | 3   |
| 7 F01F1.8a;F01F1.8b  | HTITQIK                     | 12  | 1806  | 2.34 | 0.07 | 3   |
| 22 F01F1.8a;F01F1.8b | MLVSGAGDIK                  | 54  | 10306 | 2.42 | 0.09 | 4   |
| 22 F01F1.8a;F01F1.8b | MLVSGAGDIK                  | 21  | 7967  | 2.56 | 0.17 | 7   |
| 22 F01F1.8a;F01F1.8b | MLVSGAGDIK                  | 32  | 8659  | 2.97 | 0.12 | 4   |
| 10 F01F1.8a;F01F1.8b | HTITQIK                     | 19  | 5088  | 3.32 | 0.16 | 5   |
| 10 F01F1.8a;F01F1.8b | HTITQIK                     | 16  | 4034  | 4.23 | 0.18 | 4   |
| 10 F01F1.9           | AVTPFHATQEVK                | 34  | 10453 | 0.10 | 0.20 | 193 |
| 10 F01F1.9           | HEENHRPAFHGGVVVK            | 21  | 10227 | 0.16 | 0.27 | 168 |
| 10 F01F1.9           | SMLISADQAHATHPNYSAK         | 31  | 6751  | 0.19 | 0.22 | 111 |
| 10 F01F1.9           | AVTPFHATQEVK                | 33  | 9833  | 0.20 | 0.30 | 153 |
| 10 F01F1.9           | VNVNQRYATTSTTHAALK          | 52  | 15330 | 0.20 | 0.17 | 83  |
| 10 F01F1.9           | HEENHRPAFHGGVVVK            | 18  | 7079  | 0.23 | 0.15 | 68  |
| 10 F01F1.9           | AAQEFINYLNK                 | 40  | 1005  | 0.25 | 0.15 | 61  |
| 7 F01F1.9            | AVTPFHATQEVK                | 46  | 10084 | 0.25 | 0.13 | 54  |
| 7 F01F1.9            | AVTPFHATQEVK                | 38  | 9659  | 0.26 | 0.17 | 64  |
| 10 F01F1.9           | VNVNQRYATTSTTHAALK          | 44  | 13523 | 0.27 | 0.30 | 111 |
| 22 F01F1.9           | AAQEFINYLNK                 | 34  | 1022  | 0.29 | 0.21 | 74  |
| 10 F01F1.9           | SMLISADQAHATHPNYSAK         | 57  | 16427 | 0.31 | 0.40 | 130 |
| 7 F01F1.9            | AAQEFINYLNK                 | 45  | 2147  | 0.31 | 0.23 | 74  |
| 7 F01F1.9            | VNVNQRYATTSTTHAALK          | 47  | 11424 | 0.35 | 0.16 | 45  |
| 7 F01F1.9            | AVTPFHATQEVK                | 30  | 8410  | 0.37 | 0.25 | 68  |
| 22 F01F1.9           | AAQEFINYLNK                 | 29  | 1327  | 0.38 | 0.22 | 58  |
| 7 F01F1.9            | SMLISADQAHATHPNYSAK         | 50  | 13777 | 0.38 | 0.31 | 82  |
| 7 F01F1.9            | VNVNQRYATTSTTHAALK          | 67  | 2892  | 0.38 | 0.40 | 104 |
| 7 F01F1.9            | SMLISADQAHATHPNYSAK         | 24  | 11244 | 0.39 | 0.06 | 15  |
| 7 F01F1.9            | AAQEFINYLNK                 | 43  | 1789  | 0.42 | 0.21 | 50  |
| 7 F01F1.9            | VNVNQRYATTSTTHAALK          | 48  | 1853  | 0.44 | 0.35 | 80  |
| 7 F01F1.9            | VNVNQRYATTSTTHAALK          | 43  | 7352  | 0.63 | 0.19 | 30  |
| 1 F01F1.9            | VNVNQRYATTSTTHAALK          | 25  | 2265  | 0.64 | 0.13 | 20  |
| 7 F01F1.9            | VNVNQRYATTSTTHAALK          | 45  | 1104  | 0.81 | 0.22 | 27  |
| 1 F01F1.9            | AVTPFHATQEVK                | 29  | 9868  | 0.83 | 0.16 | 19  |
| 1 F01F1.9            | AAQEFINYLNK                 | 35  | 840   | 0.86 | 0.15 | 18  |
| 1 F01F1.9            | AVTPFHATQEVK                | 45  | 8596  | 0.91 | 0.10 | 11  |
| 7 F01F1.9            | AAQEFINYLNK                 | 42  | 1050  | 0.96 | 0.11 | 11  |
| 1 F01F1.9            | AAQEFINYLNK                 | 56  | 1182  | 1.21 | 0.11 | 9   |
| 22 F01F1.9           | AAQEFINYLNK                 | 33  | 1202  | 1.24 | 0.14 | 11  |
| 1 F01F1.9            | VNVNQRYATTSTTHAALK          | 42  | 8712  | 1.24 | 0.17 | 14  |
| 1 F01F1.9            | HEENHRPAFHGGVVVK            | 18  | 6939  | 1.27 | 0.14 | 11  |
| 22 F01F1.9           | AAQEFINYLNK                 | 45  | 1358  | 1.32 | 0.16 | 12  |
| 22 F01F1.9           | SMLISADQAHATHPNYSAK         | 65  | 25044 | 1.36 | 0.08 | 6   |
| 1 F01F1.9            | SMLISADQAHATHPNYSAK         | 46  | 20893 | 1.38 | 0.22 | 16  |
| 22 F01F1.9           | AVTPFHATQEVK                | 38  | 11161 | 1.39 | 0.08 | 6   |
| 7 F01F1.9            | VNVNQRYATTSTTHAALK          | 58  | 7062  | 1.39 | 0.13 | 9   |
| 1 F01F1.9            | VNVNQRYATTSTTHAALK          | 59  | 8493  | 1.41 | 0.19 | 13  |
| 7 F01F1.9            | VNVNQRYATTSTTHAALK          | 56  | 6837  | 1.42 | 0.11 | 8   |
| 1 F01F1.9            | HEENHRPAFHGGVVVK            | 23  | 4429  | 1.47 | 0.07 | 5   |
| 22 F01F1.9           | VNVNQRYATTSTTHAALK          | 55  | 11884 | 1.50 | 0.18 | 12  |
| 22 F01F1.9           | SMLISADQAHATHPNYSAK         | 71  | 26820 | 1.57 | 0.11 | 7   |
| 7 F01F1.9            | SMLISADQAHATHPNYSAK         | 13  | 12415 | 1.64 | 0.05 | 3   |
| 1 F01F1.9            | SMLISADQAHATHPNYSAK         | 53  | 13694 | 1.70 | 0.14 | 8   |
| 7 F01F1.9            | SMLISADQAHATHPNYSAK         | 44  | 10569 | 1.80 | 0.04 | 2   |
| 22 F01F1.9           | AVTPFHATQEVK                | 31  | 9042  | 1.80 | 0.11 | 6   |
| 7 F01F1.9            | VNVNQRYATTSTTHAALK          | 48  | 9265  | 1.80 | 0.16 | 9   |
| 7 F01F1.9            | AVTPFHATQEVK                | 48  | 10327 | 1.80 | 0.08 | 4   |
| 1 F01F1.9            | SMLISADQAHATHPNYSAK         | 41  | 16411 | 1.82 | 0.07 | 4   |
| 7 F01F1.9            | VNVNQRYATTSTTHAALK          | 70  | 9976  | 1.86 | 0.15 | 8   |
| 1 F01F1.9            | SMLISADQAHATHPNYSAK         | 56  | 10198 | 1.89 | 0.13 | 7   |
| 22 F01F1.9           | VNVNQRYATTSTTHAALK          | 47  | 7557  | 1.89 | 0.19 | 10  |
| 7 F01F1.9            | AVTPFHATQEVK                | 27  | 9082  | 1.96 | 0.10 | 5   |
| 22 F01F1.9           | HEENHRPAFHGGVVVK            | 16  | 6263  | 2.02 | 0.25 | 12  |
| 22 F01F1.9           | SMLISADQAHATHPNYSAK         | 63  | 15367 | 2.31 | 0.10 | 4   |
| 22 F01F1.9           | SMLISADQAHATHPNYSAK         | 41  | 15458 | 2.89 | 0.12 | 4   |
| 22 F01F1.9           | SMLISADQAHATHPNYSAK         | 27  | 8752  | 3.46 | 0.11 | 3   |
| 10 F01F1.9           | SMLISADQAHATHPNYSAK         | 25  | 7536  | 3.51 | 0.50 | 14  |
| 10 F01F1.9           | AAQEFINYLNK                 | 40  | 1142  | 3.81 | 0.12 | 3   |
| 10 F01F1.9           | AAQEFINYLNK                 | 25  | 798   | 6.25 | 0.09 | 1   |
| 10 F01F1.9           | VNVNQRYATTSTTHAALK          | 53  | 9320  | 6.78 | 0.26 | 4   |
| 10 F01F1.9           | VNVNQRYATTSTTHAALK          | 87  | 10907 | 7.27 | 0.35 | 5   |
| 10 F01F1.9           | SMLISADQAHATHPNYSAK         | 48  | 10442 | 7.86 | 0.62 | 8   |
| 10 F01F1.9           | HEENHRPAFHGGVVVK            | 32  | 10083 | 8.03 | 0.21 | 3   |
| 10 F01F1.9           | AVTPFHATQEVK                | 31  | 9827  | 8.87 | 0.20 | 2   |
| 10 F01F1.9           | AVTPFHATQEVK                | 29  | 9587  | 9.62 | 0.34 | 4   |
| 1 F01G10.1           | TIAEHALK                    | 15  | 614   | 0.28 | 0.25 | 87  |
| 22 F01G10.1          | EVPRSGPPDALVDMYGISARHIVAAVK | 39  | 10470 | 0.33 | 0.26 | 79  |
| 7 F01G10.1           | EVPRSGPPDALVDMYGISARHIVAAVK | 34  | 7816  | 0.37 | 0.13 | 36  |
| 10 F01G10.1          | IVLVGSGVTLYESLK             | 56  | 790   | 0.37 | 0.22 | 59  |
| 7 F01G10.1           | IVLVGSGVTLYESLK             | 108 | 1992  | 0.45 | 0.15 | 34  |
| 7 F01G10.1           | IVLVGSGVTLYESLK             | 66  | 945   | 0.51 | 0.18 | 36  |
| 7 F01G10.1           | LGDASPRVIGLDGDTK            | 30  | 3038  | 0.52 | 0.21 | 39  |
| 22 F01G10.1          | LGDASPRVIGLDGDTK            | 36  | 9347  | 0.53 | 0.18 | 35  |
| 22 F01G10.1          | LGDASPRVIGLDGDTK            | 28  | 6457  | 0.54 | 0.10 | 18  |
| 7 F01G10.1           | LGDASPRVIGLDGDTK            | 19  | 2738  | 0.55 | 0.16 | 29  |
| 10 F01G10.1          | EVPRSGPPDALVDMYGISARHIVAAVK | 12  | 5096  | 0.55 | 0.21 | 38  |
| 7 F01G10.1           | IVLVGSGVTLYESLK             | 77  | 1308  | 0.56 | 0.21 | 37  |
| 10 F01G10.1          | EVPRSGPPDALVDMYGISARHIVAAVK | 11  | 6855  | 0.58 | 0.16 | 27  |
| 22 F01G10.1          | GIEGIENEDNWHGKPVPEGTVNAIK   | 39  | 12128 | 0.61 | 0.19 | 31  |
| 10 F01G10.1          | EVPRSGPPDALVDMYGISARHIVAAVK | 22  | 9129  | 0.61 | 0.17 | 27  |
| 7 F01G10.1           | LGDASPRVIGLDGDTK            | 17  | 1699  | 0.62 | 0.23 | 37  |
| 22 F01G10.1          | SASADRFVLSK                 | 34  | 22086 | 0.62 | 0.07 | 11  |
| 7 F01G10.1           | SASADRFVLSK                 | 32  | 3122  | 0.62 | 0.09 | 14  |
| 22 F01G10.1          | LGDASPRVIGLDGDTK            | 19  | 6383  | 0.63 | 0.16 | 26  |
| 7 F01G10.1           | GKPTAIK                     | 17  | 3695  | 0.64 | 0.10 | 16  |

|             |                             |    |       |      |      |    |
|-------------|-----------------------------|----|-------|------|------|----|
| 22 F01G10.1 | SASADRFVLSK                 | 29 | 7319  | 0.65 | 0.32 | 49 |
| 22 F01G10.1 | TIAEHALK                    | 23 | 4657  | 0.65 | 0.15 | 23 |
| 10 F01G10.1 | TIAEHALK                    | 21 | 3092  | 0.68 | 0.14 | 20 |
| 10 F01G10.1 | LGDASPRVIGLDGDTK            | 29 | 8223  | 0.69 | 0.15 | 21 |
| 10 F01G10.1 | SASADRFVLSK                 | 12 | 2768  | 0.70 | 0.27 | 39 |
| 1 F01G10.1  | SASADRFVLSK                 | 18 | 3233  | 0.70 | 0.11 | 15 |
| 22 F01G10.1 | SGHPTSSTSAAEIMSTLFFSEMK     | 54 | 2086  | 0.70 | 0.08 | 11 |
| 22 F01G10.1 | SASADRFVLSK                 | 21 | 2606  | 0.70 | 0.09 | 13 |
| 7 F01G10.1  | TIAEHALK                    | 56 | 63120 | 0.70 | 0.09 | 13 |
| 7 F01G10.1  | TIAEHALK                    | 49 | 47292 | 0.71 | 0.16 | 23 |
| 22 F01G10.1 | TIAEHALK                    | 46 | 47707 | 0.72 | 0.10 | 13 |
| 22 F01G10.1 | EVPRSGPPDALVDMYGISARHIVAAVK | 32 | 5089  | 0.73 | 0.14 | 19 |
| 1 F01G10.1  | VATRAAYGTALAK               | 32 | 2604  | 0.74 | 0.19 | 25 |
| 7 F01G10.1  | LGDASPRVIGLDGDTK            | 20 | 5874  | 0.74 | 0.06 | 8  |
| 7 F01G10.1  | GKPTAIIAK                   | 13 | 3535  | 0.75 | 0.09 | 12 |
| 22 F01G10.1 | SASADRFVLSK                 | 37 | 16396 | 0.75 | 0.12 | 16 |
| 22 F01G10.1 | IVLVGSGVTLYESLK             | 90 | 1704  | 0.76 | 0.20 | 26 |
| 22 F01G10.1 | EGIHATVIDPFTIKPLDGK         | 17 | 5041  | 0.76 | 0.04 | 5  |
| 1 F01G10.1  | TIAEHALK                    | 58 | 96110 | 0.77 | 0.06 | 8  |
| 7 F01G10.1  | TIAEHALK                    | 31 | 4050  | 0.77 | 0.16 | 21 |
| 10 F01G10.1 | EVPRSGPPDALVDMYGISARHIVAAVK | 24 | 11441 | 0.77 | 0.22 | 28 |
| 22 F01G10.1 | TIAEHALK                    | 63 | 54860 | 0.78 | 0.11 | 14 |
| 22 F01G10.1 | LGDASPRVIGLDGDTK            | 29 | 6789  | 0.81 | 0.15 | 19 |
| 22 F01G10.1 | SASADRFVLSK                 | 43 | 4656  | 0.82 | 0.08 | 9  |
| 22 F01G10.1 | GKPTAIIAK                   | 23 | 3276  | 0.82 | 0.39 | 48 |
| 1 F01G10.1  | GKPTAIIAK                   | 24 | 757   | 0.83 | 0.42 | 51 |
| 10 F01G10.1 | SASADRFVLSK                 | 35 | 5487  | 0.83 | 0.12 | 15 |
| 22 F01G10.1 | TIAEHALK                    | 23 | 3523  | 0.83 | 0.15 | 19 |
| 22 F01G10.1 | TIAEHALK                    | 18 | 6146  | 0.83 | 0.08 | 10 |
| 1 F01G10.1  | VATRAAYGTALAK               | 15 | 833   | 0.84 | 0.07 | 8  |
| 22 F01G10.1 | IVLVGSGVTLYESLK             | 69 | 1973  | 0.84 | 0.16 | 19 |
| 10 F01G10.1 | SASADRFVLSK                 | 34 | 3809  | 0.85 | 0.17 | 20 |
| 7 F01G10.1  | TIAEHALK                    | 19 | 4621  | 0.85 | 0.11 | 13 |
| 10 F01G10.1 | VATRAAYGTALAK               | 57 | 5414  | 0.86 | 0.08 | 10 |
| 10 F01G10.1 | TIAEHALK                    | 44 | 16543 | 0.86 | 0.10 | 11 |
| 7 F01G10.1  | TIAEHALK                    | 10 | 2735  | 0.87 | 0.13 | 15 |
| 22 F01G10.1 | LGDASPRVIGLDGDTK            | 33 | 6803  | 0.87 | 0.24 | 28 |
| 7 F01G10.1  | LGDASPRVIGLDGDTK            | 18 | 5359  | 0.88 | 0.10 | 11 |
| 1 F01G10.1  | VATRAAYGTALAK               | 25 | 1445  | 0.89 | 0.14 | 16 |
| 22 F01G10.1 | SASADRFVLSK                 | 24 | 2334  | 0.89 | 0.19 | 21 |
| 7 F01G10.1  | TIAEHALK                    | 18 | 2340  | 0.89 | 0.18 | 20 |
| 22 F01G10.1 | GKPTAIIAK                   | 18 | 6652  | 0.90 | 0.26 | 29 |
| 22 F01G10.1 | GKPTAIIAK                   | 19 | 3311  | 0.91 | 0.10 | 11 |
| 22 F01G10.1 | LGDASPRVIGLDGDTK            | 10 | 5250  | 0.91 | 0.17 | 19 |
| 7 F01G10.1  | GIEGIENEDNWHGKPVPEGTVNAIK   | 33 | 2820  | 0.91 | 0.15 | 17 |
| 10 F01G10.1 | TIAEHALK                    | 46 | 32299 | 0.92 | 0.09 | 10 |
| 7 F01G10.1  | SASADRFVLSK                 | 13 | 2480  | 0.92 | 0.20 | 21 |
| 10 F01G10.1 | TIAEHALK                    | 41 | 7501  | 0.93 | 0.15 | 16 |
| 10 F01G10.1 | TIAEHALK                    | 43 | 29406 | 0.93 | 0.05 | 6  |
| 1 F01G10.1  | TIAEHALK                    | 15 | 4352  | 0.94 | 0.14 | 15 |
| 1 F01G10.1  | VATRAAYGTALAK               | 40 | 4283  | 0.94 | 0.18 | 19 |
| 22 F01G10.1 | EVPRSGPPDALVDMYGISARHIVAAVK | 32 | 4493  | 0.94 | 0.25 | 26 |
| 7 F01G10.1  | SASADRFVLSK                 | 14 | 1244  | 0.94 | 0.06 | 7  |
| 22 F01G10.1 | LGDASPRVIGLDGDTK            | 21 | 6697  | 0.94 | 0.37 | 39 |
| 22 F01G10.1 | GIEGIENEDNWHGKPVPEGTVNAIK   | 39 | 5684  | 0.95 | 0.27 | 28 |
| 22 F01G10.1 | SASADRFVLSK                 | 16 | 3276  | 0.95 | 0.13 | 14 |
| 22 F01G10.1 | TIAEHALK                    | 16 | 2113  | 0.95 | 0.17 | 17 |
| 10 F01G10.1 | TIAEHALK                    | 40 | 19908 | 0.97 | 0.06 | 6  |
| 22 F01G10.1 | SASADRFVLSK                 | 27 | 6579  | 0.97 | 0.11 | 11 |
| 22 F01G10.1 | SASADRFVLSK                 | 17 | 1934  | 0.98 | 0.09 | 9  |
| 22 F01G10.1 | SASADRFVLSK                 | 43 | 15657 | 0.98 | 0.07 | 7  |
| 22 F01G10.1 | VATRAAYGTALAK               | 37 | 3751  | 0.99 | 0.12 | 12 |
| 10 F01G10.1 | VATRAAYGTALAK               | 59 | 4253  | 0.99 | 0.12 | 12 |
| 10 F01G10.1 | VATRAAYGTALAK               | 23 | 4490  | 0.99 | 0.11 | 11 |
| 22 F01G10.1 | GIEGIENEDNWHGKPVPEGTVNAIK   | 28 | 10162 | 1.00 | 0.29 | 29 |
| 10 F01G10.1 | LGDASPRVIGLDGDTK            | 41 | 6904  | 1.00 | 0.10 | 10 |
| 10 F01G10.1 | LGDASPRVIGLDGDTK            | 22 | 5655  | 1.00 | 0.26 | 25 |
| 22 F01G10.1 | LGDASPRVIGLDGDTK            | 16 | 4904  | 1.02 | 0.29 | 29 |
| 10 F01G10.1 | LGDASPRVIGLDGDTK            | 26 | 7096  | 1.02 | 0.18 | 17 |
| 10 F01G10.1 | VATRAAYGTALAK               | 26 | 3719  | 1.03 | 0.17 | 16 |
| 1 F01G10.1  | VATRAAYGTALAK               | 55 | 1530  | 1.03 | 0.15 | 15 |
| 10 F01G10.1 | SGHPTSSTSAAEIMSTLFFSEMK     | 32 | 1595  | 1.04 | 0.16 | 16 |
| 7 F01G10.1  | SASADRFVLSK                 | 35 | 3603  | 1.05 | 0.31 | 30 |
| 22 F01G10.1 | SASADRFVLSK                 | 37 | 18136 | 1.05 | 0.10 | 9  |
| 10 F01G10.1 | GKPTAIIAK                   | 14 | 7265  | 1.05 | 0.15 | 15 |
| 22 F01G10.1 | SASADRFVLSK                 | 39 | 7923  | 1.05 | 0.16 | 16 |
| 22 F01G10.1 | SGHPTSSTSAAEIMSTLFFSEMK     | 53 | 1991  | 1.06 | 0.29 | 28 |
| 7 F01G10.1  | TIAEHALK                    | 53 | 11735 | 1.06 | 0.16 | 15 |
| 1 F01G10.1  | VATRAAYGTALAK               | 37 | 3582  | 1.07 | 0.15 | 14 |
| 22 F01G10.1 | EVPRSGPPDALVDMYGISARHIVAAVK | 33 | 5463  | 1.07 | 0.20 | 18 |
| 22 F01G10.1 | GKPTAIIAK                   | 14 | 4989  | 1.08 | 0.35 | 33 |
| 7 F01G10.1  | SASADRFVLSK                 | 11 | 2438  | 1.09 | 0.11 | 11 |
| 10 F01G10.1 | VATRAAYGTALAK               | 51 | 3107  | 1.10 | 0.15 | 14 |
| 7 F01G10.1  | IVLVGSGVTLYESLK             | 76 | 1006  | 1.12 | 0.13 | 11 |
| 7 F01G10.1  | TIAEHALK                    | 34 | 3292  | 1.12 | 0.12 | 10 |
| 22 F01G10.1 | GKPTAIIAK                   | 26 | 4679  | 1.14 | 0.09 | 8  |
| 7 F01G10.1  | SASADRFVLSK                 | 20 | 3673  | 1.14 | 0.08 | 7  |
| 22 F01G10.1 | SASADRFVLSK                 | 21 | 5869  | 1.14 | 0.13 | 11 |
| 7 F01G10.1  | SASADRFVLSK                 | 21 | 6530  | 1.14 | 0.14 | 12 |
| 22 F01G10.1 | GKPTAIIAK                   | 25 | 4137  | 1.15 | 0.37 | 33 |
| 10 F01G10.1 | SASADRFVLSK                 | 23 | 4026  | 1.16 | 0.13 | 11 |
| 10 F01G10.1 | GIEGIENEDNWHGKPVPEGTVNAIK   | 31 | 9197  | 1.17 | 0.14 | 12 |
| 22 F01G10.1 | TIAEHALK                    | 43 | 3049  | 1.17 | 0.13 | 11 |
| 22 F01G10.1 | EVPRSGPPDALVDMYGISARHIVAAVK | 43 | 5765  | 1.18 | 0.15 | 12 |
| 10 F01G10.1 | VATRAAYGTALAK               | 23 | 5085  | 1.18 | 0.16 | 13 |
| 1 F01G10.1  | SASADRFVLSK                 | 50 | 5882  | 1.18 | 0.16 | 14 |
| 22 F01G10.1 | TIAEHALK                    | 46 | 2438  | 1.18 | 0.09 | 7  |
| 1 F01G10.1  | VATRAAYGTALAK               | 47 | 3028  | 1.18 | 0.17 | 15 |
| 1 F01G10.1  | VATRAAYGTALAK               | 19 | 882   | 1.18 | 0.16 | 14 |
| 10 F01G10.1 | SASADRFVLSK                 | 38 | 16840 | 1.18 | 0.12 | 10 |
| 22 F01G10.1 | EVPRSGPPDALVDMYGISARHIVAAVK | 22 | 6476  | 1.19 | 0.16 | 13 |

|                        |                             |     |       |       |      |    |
|------------------------|-----------------------------|-----|-------|-------|------|----|
| 22 F01G10.1            | TIAEHALK                    | 25  | 3365  | 1.19  | 0.14 | 11 |
| 1 F01G10.1             | LGDASPRVIGLDGDTK            | 17  | 3743  | 1.20  | 0.05 | 4  |
| 1 F01G10.1             | SASADRFVLSK                 | 14  | 1814  | 1.20  | 0.19 | 16 |
| 1 F01G10.1             | VATRAAYGTALAK               | 12  | 1116  | 1.20  | 0.13 | 11 |
| 1 F01G10.1             | SASADRFVLSK                 | 12  | 5714  | 1.21  | 0.05 | 4  |
| 10 F01G10.1            | SASADRFVLSK                 | 15  | 2162  | 1.22  | 0.11 | 9  |
| 10 F01G10.1            | TIAEHALK                    | 31  | 4630  | 1.22  | 0.15 | 12 |
| 22 F01G10.1            | IVLVGSGVTLYESLK             | 84  | 1605  | 1.22  | 0.12 | 10 |
| 7 F01G10.1             | VATRAAYGTALAK               | 47  | 2502  | 1.22  | 0.11 | 9  |
| 10 F01G10.1            | SASADRFVLSK                 | 16  | 3048  | 1.25  | 0.19 | 15 |
| 10 F01G10.1            | SASADRFVLSK                 | 30  | 6666  | 1.26  | 0.09 | 7  |
| 22 F01G10.1            | SASADRFVLSK                 | 31  | 5737  | 1.26  | 0.09 | 8  |
| 22 F01G10.1            | TIAEHALK                    | 29  | 5836  | 1.26  | 0.13 | 11 |
| 10 F01G10.1            | EGIHATVIDPFTIKPLDGK         | 15  | 3302  | 1.26  | 0.18 | 14 |
| 1 F01G10.1             | GIEGIENEDNWHGKPVPEGTVNAIK   | 19  | 4838  | 1.28  | 0.16 | 13 |
| 7 F01G10.1             | TIAEHALK                    | 51  | 17510 | 1.29  | 0.12 | 10 |
| 1 F01G10.1             | GIEGIENEDNWHGKPVPEGTVNAIK   | 20  | 4523  | 1.29  | 0.20 | 15 |
| 22 F01G10.1            | SASADRFVLSK                 | 26  | 3506  | 1.30  | 0.13 | 10 |
| 10 F01G10.1            | TIAEHALK                    | 25  | 4862  | 1.30  | 0.11 | 9  |
| 1 F01G10.1             | SASADRFVLSK                 | 12  | 1772  | 1.33  | 0.18 | 13 |
| 22 F01G10.1            | SASADRFVLSK                 | 21  | 2357  | 1.33  | 0.09 | 7  |
| 22 F01G10.1            | EVPRSGPPDALVDMYGISARHIVAAVK | 18  | 4817  | 1.33  | 0.14 | 11 |
| 7 F01G10.1             | TIAEHALK                    | 10  | 1334  | 1.33  | 0.13 | 10 |
| 10 F01G10.1            | VATRAAYGTALAK               | 49  | 3257  | 1.34  | 0.12 | 9  |
| 10 F01G10.1            | GKPTAIIAK                   | 12  | 3998  | 1.34  | 0.19 | 15 |
| 1 F01G10.1             | SASADRFVLSK                 | 10  | 1723  | 1.34  | 0.11 | 8  |
| 10 F01G10.1            | TIAEHALK                    | 30  | 4650  | 1.34  | 0.15 | 11 |
| 22 F01G10.1            | IVLVGSGVTLYESLK             | 99  | 1863  | 1.34  | 0.16 | 12 |
| 10 F01G10.1            | SASADRFVLSK                 | 24  | 4879  | 1.34  | 0.08 | 6  |
| 10 F01G10.1            | SASADRFVLSK                 | 18  | 7364  | 1.36  | 0.09 | 7  |
| 7 F01G10.1             | VATRAAYGTALAK               | 39  | 1924  | 1.36  | 0.12 | 9  |
| 10 F01G10.1            | SASADRFVLSK                 | 35  | 13775 | 1.36  | 0.06 | 4  |
| 1 F01G10.1             | SASADRFVLSK                 | 37  | 2249  | 1.36  | 0.33 | 24 |
| 10 F01G10.1            | VATRAAYGTALAK               | 60  | 4512  | 1.36  | 0.11 | 8  |
| 10 F01G10.1            | SASADRFVLSK                 | 28  | 3222  | 1.36  | 0.17 | 13 |
| 7 F01G10.1             | VATRAAYGTALAK               | 26  | 2082  | 1.41  | 0.13 | 10 |
| 22 F01G10.1            | SASADRFVLSK                 | 25  | 2439  | 1.41  | 0.18 | 13 |
| 1 F01G10.1             | TIAEHALK                    | 26  | 3221  | 1.43  | 0.10 | 7  |
| 22 F01G10.1            | VATRAAYGTALAK               | 58  | 4816  | 1.43  | 0.14 | 10 |
| 1 F01G10.1             | VATRAAYGTALAK               | 27  | 1785  | 1.43  | 0.19 | 13 |
| 10 F01G10.1            | SASADRFVLSK                 | 24  | 5033  | 1.46  | 0.17 | 12 |
| 22 F01G10.1            | VATRAAYGTALAK               | 58  | 4588  | 1.49  | 0.12 | 8  |
| 22 F01G10.1            | SASADRFVLSK                 | 18  | 2440  | 1.51  | 0.19 | 12 |
| 10 F01G10.1            | VATRAAYGTALAK               | 51  | 2764  | 1.55  | 0.14 | 9  |
| 22 F01G10.1            | IVLVGSGVTLYESLK             | 71  | 1490  | 1.56  | 0.28 | 18 |
| 10 F01G10.1            | TIAEHALK                    | 20  | 2951  | 1.58  | 0.17 | 11 |
| 22 F01G10.1            | TIAEHALK                    | 26  | 2692  | 1.60  | 0.11 | 7  |
| 10 F01G10.1            | SASADRFVLSK                 | 15  | 6633  | 1.60  | 0.25 | 16 |
| 22 F01G10.1            | IVLVGSGVTLYESLK             | 68  | 1494  | 1.63  | 0.30 | 18 |
| 10 F01G10.1            | SASADRFVLSK                 | 11  | 2069  | 1.66  | 0.10 | 6  |
| 1 F01G10.1             | IVLVGSGVTLYESLK             | 92  | 1303  | 1.69  | 0.16 | 9  |
| 22 F01G10.1            | TIAEHALK                    | 38  | 16018 | 1.71  | 0.10 | 6  |
| 1 F01G10.1             | GKPTAIIAK                   | 22  | 2459  | 1.73  | 0.30 | 17 |
| 22 F01G10.1            | TIAEHALK                    | 22  | 10277 | 1.75  | 0.10 | 6  |
| 10 F01G10.1            | TIAEHALK                    | 47  | 26653 | 1.79  | 0.08 | 5  |
| 22 F01G10.1            | SASADRFVLSK                 | 27  | 4510  | 1.80  | 0.08 | 4  |
| 10 F01G10.1            | SASADRFVLSK                 | 27  | 7070  | 1.82  | 0.15 | 8  |
| 22 F01G10.1            | TIAEHALK                    | 41  | 12468 | 1.88  | 0.10 | 5  |
| 7 F01G10.1             | TIAEHALK                    | 11  | 4578  | 1.93  | 0.11 | 6  |
| 22 F01G10.1            | SASADRFVLSK                 | 17  | 7882  | 1.93  | 0.08 | 4  |
| 1 F01G10.1             | SASADRFVLSK                 | 21  | 3479  | 1.95  | 0.10 | 5  |
| 7 F01G10.1             | SASADRFVLSK                 | 39  | 5862  | 1.98  | 0.19 | 10 |
| 7 F01G10.1             | SASADRFVLSK                 | 13  | 6846  | 2.02  | 0.19 | 9  |
| 10 F01G10.1            | TIAEHALK                    | 15  | 1669  | 2.03  | 0.18 | 9  |
| 22 F01G10.1            | VATRAAYGTALAK               | 50  | 7301  | 2.04  | 0.08 | 4  |
| 1 F01G10.1             | VATRAAYGTALAK               | 32  | 2941  | 2.10  | 0.14 | 7  |
| 1 F01G10.1             | VATRAAYGTALAK               | 57  | 4803  | 2.14  | 0.13 | 6  |
| 22 F01G10.1            | GIEGIENEDNWHGKPVPEGTVNAIK   | 32  | 5679  | 2.17  | 0.21 | 9  |
| 22 F01G10.1            | SASADRFVLSK                 | 13  | 1585  | 2.18  | 0.11 | 5  |
| 7 F01G10.1             | TIAEHALK                    | 13  | 5022  | 2.20  | 0.12 | 6  |
| 10 F01G10.1            | TIAEHALK                    | 39  | 27483 | 2.21  | 0.13 | 6  |
| 10 F01G10.1            | TIAEHALK                    | 23  | 18360 | 2.36  | 0.08 | 3  |
| 10 F01G10.1            | SASADRFVLSK                 | 50  | 11365 | 2.42  | 0.09 | 4  |
| 1 F01G10.1             | IVLVGSGVTLYESLK             | 51  | 894   | 2.45  | 0.10 | 4  |
| 22 F01G10.1            | SASADRFVLSK                 | 19  | 5909  | 2.47  | 0.08 | 3  |
| 10 F01G10.1            | SASADRFVLSK                 | 27  | 7987  | 2.58  | 0.15 | 6  |
| 22 F01G10.1            | GKPTAIIAK                   | 26  | 8452  | 2.83  | 0.94 | 33 |
| 7 F01G10.1             | GKPTAIIAK                   | 17  | 2663  | 5.37  | 0.64 | 12 |
| 10 F01G10.1            | SASADRFVLSK                 | 28  | 3750  | 8.03  | 0.21 | 3  |
| 10 F01G10.1            | GKPTAIIAK                   | 23  | 11027 | 17.27 | 0.37 | 2  |
| 10 F01G10.1            | GKPTAIIAK                   | 25  | 9201  | 21.36 | 0.36 | 2  |
| 7 F01G10.1             | GKPTAIIAK                   | 23  | 3382  | 28.05 | 0.45 | 2  |
| 22 F01G12.5b;F01G12.5a | HSQTTTEVPRCEGQTK            | 21  | 2567  | 0.75  | 0.39 | 53 |
| 22 F01G12.5b;F01G12.5a | GDGGIPGAPGVSGPSGIPGLPGPK    | 11  | 6425  | 3.16  | 0.44 | 14 |
| 1 F01G4.2              | GLVALVTGGASGLGK             | 108 | 4175  | 0.38  | 0.13 | 34 |
| 1 F01G4.2              | GLVALVTGGASGLGK             | 112 | 3878  | 0.38  | 0.07 | 19 |
| 1 F01G4.2              | GLVALVTGGASGLGK             | 50  | 638   | 0.46  | 0.20 | 44 |
| 10 F01G4.2             | GLVALVTGGASGLGK             | 119 | 26262 | 0.59  | 0.07 | 12 |
| 10 F01G4.2             | GLVALVTGGASGLGK             | 125 | 20451 | 0.60  | 0.09 | 16 |
| 22 F01G4.2             | GLVALVTGGASGLGK             | 131 | 21702 | 0.63  | 0.06 | 10 |
| 7 F01G4.2              | AGAQVAILDLPQSK              | 53  | 5240  | 0.63  | 0.06 | 9  |
| 22 F01G4.2             | GLVALVTGGASGLGK             | 131 | 19427 | 0.66  | 0.06 | 9  |
| 10 F01G4.2             | AGAQVAILDLPQSK              | 44  | 4565  | 0.71  | 0.27 | 38 |
| 7 F01G4.2              | AGAQVAILDLPQSK              | 89  | 7572  | 0.78  | 0.12 | 15 |
| 10 F01G4.2             | AGAQVAILDLPQSK              | 56  | 4412  | 0.80  | 0.22 | 28 |
| 1 F01G4.2              | GLVALVTGGASGLGK             | 91  | 1847  | 0.83  | 0.10 | 12 |
| 10 F01G4.2             | LYSVQK                      | 10  | 3171  | 0.87  | 0.11 | 13 |
| 7 F01G4.2              | AGAQVAILDLPQSK              | 45  | 4551  | 0.88  | 0.11 | 12 |
| 22 F01G4.2             | AGAQVAILDLPQSK              | 25  | 2610  | 0.94  | 0.08 | 8  |
| 7 F01G4.2              | AGAQVAILDLPQSK              | 54  | 6182  | 1.06  | 0.07 | 7  |
| 1 F01G4.2              | AGAQVAILDLPQSK              | 37  | 1418  | 1.09  | 0.15 | 14 |

|                        |                     |     |       |      |      |    |
|------------------------|---------------------|-----|-------|------|------|----|
| 7 F01G4.2              | AGAQVAILDLPQSK      | 52  | 3829  | 1.13 | 0.10 | 9  |
| 10 F01G4.2             | GLVALVTGGASGLGK     | 103 | 3197  | 1.24 | 0.10 | 8  |
| 10 F01G4.2             | GLVALVTGGASGLGK     | 79  | 2166  | 1.26 | 0.13 | 10 |
| 22 F01G4.2             | GLVALVTGGASGLGK     | 70  | 2761  | 1.27 | 0.09 | 7  |
| 22 F01G4.2             | GLVALVTGGASGLGK     | 69  | 1601  | 1.46 | 0.18 | 12 |
| 1 F01G4.2              | AGAQVAILDLPQSK      | 34  | 1274  | 1.47 | 0.10 | 7  |
| 7 F01G4.2              | GLVALVTGGASGLGK     | 77  | 1673  | 1.57 | 0.17 | 11 |
| 7 F01G4.2              | GLVALVTGGASGLGK     | 83  | 1353  | 2.04 | 0.13 | 6  |
| 1 F01G4.6b             | AEGLTGFYK           | 17  | 849   | 0.51 | 0.08 | 16 |
| 7 F02A9.4a             | GTGTVFLGGPPLVK      | 13  | 1530  | 0.76 | 0.06 | 8  |
| 10 F02A9.4a            | GTGTVFLGGPPLVK      | 13  | 1827  | 1.18 | 0.13 | 11 |
| 1 F02A9.4a             | GTGTVFLGGPPLVK      | 14  | 928   | 1.39 | 0.10 | 7  |
| 1 F02A9.4a             | GTGTVFLGGPPLVK      | 32  | 743   | 1.44 | 0.07 | 5  |
| 1 F02A9.4a             | GTGTVFLGGPPLVK      | 29  | 908   | 1.47 | 0.12 | 8  |
| 1 F02A9.4a             | GTGTVFLGGPPLVK      | 24  | 740   | 1.59 | 0.09 | 6  |
| 1 F02A9.4a             | STLQWAPIK           | 17  | 698   | 1.68 | 0.12 | 7  |
| 1 F02E8.1              | YLQNAIQQLK          | 24  | 2039  | 0.74 | 0.09 | 12 |
| 10 F02E8.1             | YLQNAIQQLK          | 19  | 953   | 1.16 | 0.09 | 8  |
| 22 F02E8.1             | YLQNAIQQLK          | 29  | 1916  | 1.45 | 0.08 | 6  |
| 22 F02E8.1             | YLQNAIQQLK          | 42  | 1907  | 2.02 | 0.25 | 12 |
| 7 F02E8.1              | YLQNAIQQLK          | 29  | 1733  | 2.23 | 0.17 | 8  |
| 1 F02E9.9b;F02E9.9a    | IRALLEK             | 16  | 1791  | 0.28 | 0.14 | 51 |
| 10 F02E9.9b;F02E9.9a   | VIGSLESNELQLGFGDK   | 29  | 659   | 0.44 | 0.17 | 38 |
| 10 F02E9.9b;F02E9.9a   | MNFLDEHDEELMFK      | 35  | 798   | 0.49 | 0.17 | 35 |
| 10 F02E9.9b;F02E9.9a   | VVLEAGQGFBK         | 40  | 1675  | 0.54 | 0.13 | 24 |
| 22 F02E9.9b;F02E9.9a   | MNFLDEHDEELMFK      | 30  | 917   | 0.66 | 0.19 | 29 |
| 10 F02E9.9b;F02E9.9a   | SESVEQLK            | 15  | 2254  | 0.66 | 0.38 | 58 |
| 7 F02E9.9b;F02E9.9a    | YVEHFK              | 28  | 5736  | 0.66 | 0.14 | 22 |
| 22 F02E9.9b;F02E9.9a   | RLPWGTDYEK          | 45  | 6499  | 0.72 | 0.13 | 18 |
| 7 F02E9.9b;F02E9.9a    | YVEHFK              | 23  | 4646  | 0.75 | 0.18 | 23 |
| 10 F02E9.9b;F02E9.9a   | LDRNLDSVGRPAVNTFLAK | 13  | 2102  | 0.80 | 0.19 | 24 |
| 10 F02E9.9b;F02E9.9a   | IRALLEK             | 12  | 1549  | 0.81 | 0.06 | 8  |
| 1 F02E9.9b;F02E9.9a    | NLDGTFNFDTNK        | 36  | 896   | 0.90 | 0.19 | 21 |
| 7 F02E9.9b;F02E9.9a    | YVEHFK              | 15  | 4303  | 0.93 | 0.21 | 23 |
| 22 F02E9.9b;F02E9.9a   | VVLEAGQGFBK         | 11  | 940   | 0.95 | 0.16 | 17 |
| 7 F02E9.9b;F02E9.9a    | YVEHFK              | 15  | 5172  | 1.00 | 0.22 | 22 |
| 1 F02E9.9b;F02E9.9a    | NLDGTFNFDTNK        | 17  | 724   | 1.02 | 0.19 | 19 |
| 7 F02E9.9b;F02E9.9a    | NVSLGNVISAQPK       | 58  | 2885  | 1.03 | 0.12 | 12 |
| 1 F02E9.9b;F02E9.9a    | VVLEAGQGFBK         | 21  | 563   | 1.03 | 0.41 | 40 |
| 1 F02E9.9b;F02E9.9a    | RLPWGTDYEK          | 36  | 2414  | 1.05 | 0.10 | 10 |
| 10 F02E9.9b;F02E9.9a   | GEDGKPDHFK          | 15  | 10022 | 1.09 | 0.20 | 18 |
| 10 F02E9.9b;F02E9.9a   | NVSLGNVISAQPK       | 18  | 1456  | 1.09 | 0.13 | 12 |
| 22 F02E9.9b;F02E9.9a   | RLPWGTDYEK          | 56  | 6139  | 1.11 | 0.13 | 12 |
| 1 F02E9.9b;F02E9.9a    | NVSLGNVISAQPK       | 70  | 2975  | 1.12 | 0.07 | 6  |
| 10 F02E9.9b;F02E9.9a   | NLDGTFNFDTNK        | 47  | 2534  | 1.13 | 0.07 | 7  |
| 7 F02E9.9b;F02E9.9a    | NVSLGNVISAQPK       | 63  | 4606  | 1.13 | 0.07 | 6  |
| 22 F02E9.9b;F02E9.9a   | GEDGKPDHFK          | 16  | 14493 | 1.25 | 0.40 | 32 |
| 1 F02E9.9b;F02E9.9a    | YVEHFK              | 16  | 3423  | 1.25 | 0.20 | 16 |
| 10 F02E9.9b;F02E9.9a   | YSHYVAK             | 13  | 6652  | 1.28 | 0.10 | 8  |
| 1 F02E9.9b;F02E9.9a    | NVSLGNVISAQPK       | 96  | 2517  | 1.29 | 0.07 | 6  |
| 7 F02E9.9b;F02E9.9a    | RTHEWLDK            | 12  | 1597  | 1.31 | 0.13 | 10 |
| 7 F02E9.9b;F02E9.9a    | NVSLGNVISAQPK       | 60  | 1968  | 1.31 | 0.10 | 8  |
| 10 F02E9.9b;F02E9.9a   | YVEHFK              | 16  | 7880  | 1.34 | 0.11 | 8  |
| 10 F02E9.9b;F02E9.9a   | NLDGTFNFDTNK        | 33  | 1970  | 1.35 | 0.18 | 13 |
| 7 F02E9.9b;F02E9.9a    | YVEHFK              | 13  | 5623  | 1.36 | 0.22 | 16 |
| 7 F02E9.9b;F02E9.9a    | RLPWGTDYEK          | 32  | 1231  | 1.38 | 0.05 | 4  |
| 7 F02E9.9b;F02E9.9a    | NVSLGNVISAQPK       | 59  | 4638  | 1.40 | 0.12 | 8  |
| 10 F02E9.9b;F02E9.9a   | NLDGTFNFDTNK        | 30  | 2411  | 1.42 | 0.22 | 16 |
| 7 F02E9.9b;F02E9.9a    | YVEHFK              | 12  | 7759  | 1.42 | 0.16 | 11 |
| 7 F02E9.9b;F02E9.9a    | NVSLGNVISAQPK       | 49  | 1566  | 1.46 | 0.16 | 11 |
| 10 F02E9.9b;F02E9.9a   | VVLEAGQGFBK         | 58  | 3287  | 1.59 | 0.10 | 6  |
| 22 F02E9.9b;F02E9.9a   | FQTLVANAENILK       | 42  | 1370  | 1.60 | 0.10 | 6  |
| 1 F02E9.9b;F02E9.9a    | RLPWGTDYEK          | 49  | 2141  | 1.61 | 0.20 | 13 |
| 1 F02E9.9b;F02E9.9a    | VVLEAGQGFBK         | 27  | 1233  | 1.63 | 0.23 | 14 |
| 1 F02E9.9b;F02E9.9a    | VVLEAGQGFBK         | 53  | 1627  | 1.63 | 0.13 | 8  |
| 10 F02E9.9b;F02E9.9a   | RLPWGTDYEK          | 45  | 6388  | 1.68 | 0.11 | 6  |
| 22 F02E9.9b;F02E9.9a   | NVSLGNVISAQPK       | 58  | 9425  | 1.69 | 0.14 | 8  |
| 22 F02E9.9b;F02E9.9a   | NVSLGNVISAQPK       | 39  | 9954  | 1.71 | 0.13 | 8  |
| 7 F02E9.9b;F02E9.9a    | NVSLGNVISAQPK       | 53  | 2267  | 1.72 | 0.10 | 6  |
| 10 F02E9.9b;F02E9.9a   | RLPWGTDYEK          | 57  | 4908  | 1.76 | 0.05 | 3  |
| 10 F02E9.9b;F02E9.9a   | NVSLGNVISAQPK       | 47  | 3251  | 1.76 | 0.13 | 8  |
| 7 F02E9.9b;F02E9.9a    | VVLEAGQGFBK         | 46  | 1133  | 1.86 | 0.17 | 9  |
| 10 F02E9.9b;F02E9.9a   | VVLEAGQGFBK         | 58  | 3247  | 1.88 | 0.15 | 8  |
| 22 F02E9.9b;F02E9.9a   | VVLEAGQGFBK         | 40  | 2847  | 2.01 | 0.11 | 6  |
| 22 F02E9.9b;F02E9.9a   | VVLEAGQGFBK         | 40  | 2017  | 2.20 | 0.08 | 4  |
| 7 F02E9.9b;F02E9.9a    | VVLEAGQGFBK         | 21  | 1181  | 2.28 | 0.15 | 7  |
| 1 F02E9.9b;F02E9.9a    | GVTCTHSSNVTK        | 64  | 1840  | 2.41 | 0.13 | 5  |
| 7 F02E9.9b;F02E9.9a    | VVLEAGQGFBK         | 20  | 1262  | 2.60 | 0.19 | 7  |
| 7 F02E9.9b;F02E9.9a    | VVLEAGQGFBK         | 51  | 1489  | 2.91 | 0.14 | 5  |
| 22 F07A11.2a;F07A11.2b | SLNALQQVVARK        | 15  | 1052  | 0.54 | 0.15 | 28 |
| 22 F07A11.2a;F07A11.2b | SLNALQQVVARK        | 19  | 1256  | 0.59 | 0.17 | 29 |
| 10 F07A11.2a;F07A11.2b | VSVLSDFIK           | 13  | 294   | 0.61 | 0.16 | 27 |
| 1 F07A11.2a;F07A11.2b  | VSVLSDFIK           | 13  | 338   | 1.00 | 0.14 | 14 |
| 10 F07A11.2a;F07A11.2b | SLNALQQVVARK        | 28  | 1830  | 1.00 | 0.14 | 14 |
| 10 F07A11.2a;F07A11.2b | SLNALQQVVARK        | 25  | 1960  | 1.13 | 0.13 | 12 |
| 10 F07A11.2a;F07A11.2b | VSVLSDFIK           | 11  | 676   | 1.15 | 0.08 | 7  |
| 22 F07A11.2a;F07A11.2b | SLNALQQVVARK        | 36  | 1850  | 1.21 | 0.11 | 9  |
| 22 F07A11.2a;F07A11.2b | SLNALQQVVARK        | 23  | 2368  | 1.31 | 0.14 | 11 |
| 10 F07A11.2a;F07A11.2b | SLNALQQVVARK        | 22  | 1649  | 2.12 | 0.11 | 5  |
| 22 F07A11.2a;F07A11.2b | VSVLSDFIK           | 17  | 697   | 2.59 | 0.15 | 6  |
| 10 F07A11.2a;F07A11.2b | SLNALQQVVARK        | 22  | 1821  | 2.69 | 0.10 | 4  |
| 7 F07A11.2a;F07A11.2b  | SLNALQQVVARK        | 27  | 1473  | 2.72 | 0.24 | 9  |
| 10 F07A11.2a;F07A11.2b | SLNALQQVVARK        | 15  | 835   | 2.90 | 0.08 | 3  |
| 1 F07A11.5             | THTATATITVVK        | 35  | 701   | 0.43 | 0.15 | 34 |
| 10 F07A11.5            | GVDDVEHTAVIK        | 69  | 2802  | 0.66 | 0.18 | 28 |
| 7 F07A11.5             | GVDDVEHTAVIK        | 46  | 1066  | 0.84 | 0.15 | 18 |
| 22 F07A11.5            | MGPQHAIITLGGK       | 26  | 2223  | 1.10 | 0.12 | 11 |
| 22 F07A11.5            | MGPQHAIITLGGK       | 28  | 1313  | 1.22 | 0.23 | 19 |
| 7 F07A11.5             | THTATATITVVK        | 23  | 648   | 1.23 | 0.16 | 13 |
| 22 F07A11.5            | GVDDVEHTAVIK        | 44  | 1984  | 1.24 | 0.21 | 17 |
| 22 F07A11.5            | MGPQHAIITLGGK       | 24  | 2482  | 1.37 | 0.07 | 5  |

|                      |                              |     |       |       |      |     |
|----------------------|------------------------------|-----|-------|-------|------|-----|
| 1 F07A11.5           | MGPQHAIITLGGK                | 34  | 796   | 1.39  | 0.11 | 8   |
| 22 F07A11.5          | MGPQHAIITLGGK                | 13  | 1056  | 1.45  | 0.13 | 9   |
| 22 F07A11.5          | THTATATITVNK                 | 66  | 3282  | 1.56  | 0.15 | 9   |
| 22 F07A11.5          | THTATATITVNK                 | 68  | 3284  | 1.58  | 0.10 | 7   |
| 10 F07A11.5          | MGPQHAIITLGGK                | 17  | 3039  | 1.65  | 0.12 | 7   |
| 7 F07A11.5           | MGPQHAIITLGGK                | 36  | 1178  | 1.70  | 0.15 | 9   |
| 7 F07A11.5           | THTATATITVNK                 | 20  | 1768  | 1.73  | 0.24 | 14  |
| 22 F07A11.5          | GVDDVEHTAVIK                 | 63  | 2234  | 1.76  | 0.15 | 8   |
| 10 F07A11.5          | MGPQHAIITLGGK                | 24  | 2153  | 1.82  | 0.13 | 7   |
| 10 F07A11.5          | THTATATITVNK                 | 68  | 4532  | 1.94  | 0.07 | 4   |
| 10 F07A11.5          | THTATATITVNK                 | 62  | 4051  | 2.14  | 0.14 | 7   |
| 22 F07A5.7a;F07A5.7b | EVQQLVDEEHK                  | 71  | 2487  | 0.41  | 0.30 | 74  |
| 10 F07A5.7a;F07A5.7b | NFVMAQDADRLTEK               | 14  | 623   | 1.18  | 0.16 | 14  |
| 1 F07A5.7a;F07A5.7b  | VQLDNLQHVK                   | 30  | 933   | 1.35  | 0.13 | 10  |
| 7 F07A5.7a;F07A5.7b  | VQLDNLQHVK                   | 30  | 1579  | 1.70  | 0.15 | 9   |
| 7 F07A5.7a;F07A5.7b  | VQLDNLQHVK                   | 29  | 1804  | 1.89  | 0.17 | 9   |
| 10 F07A5.7a;F07A5.7b | VQLDNLQHVK                   | 27  | 2847  | 3.13  | 0.19 | 6   |
| 22 F07A5.7a;F07A5.7b | VQLDNLQHVK                   | 50  | 3413  | 13.28 | 0.26 | 2   |
| 22 F07A5.7a;F07A5.7b | VQLDNLQHVK                   | 43  | 2918  | 13.65 | 0.21 | 2   |
| 22 F07D10.1          | YDGIILPPKPK                  | 39  | 64656 | 0.55  | 0.17 | 31  |
| 22 F07D10.1          | YDGIILPPKPK                  | 36  | 25938 | 0.62  | 0.11 | 17  |
| 22 F07D10.1          | YDGIILPPKPK                  | 30  | 71137 | 0.67  | 0.09 | 14  |
| 22 F07D10.1          | YDGIILPPKPK                  | 39  | 29815 | 0.83  | 0.06 | 8   |
| 22 F07D10.1          | VLEQLTGQTPVFSK               | 78  | 19976 | 0.93  | 0.11 | 12  |
| 22 F07D10.1          | VLEQLTGQTPVFSK               | 94  | 21195 | 1.08  | 0.07 | 7   |
| 22 F07D10.1          | IAVHCTVRGPK                  | 39  | 3565  | 1.10  | 0.11 | 10  |
| 22 F07D10.1          | VLEQLTGQTPVFSK               | 35  | 1991  | 2.05  | 0.21 | 10  |
| 22 F07D10.1          | VLEQLTGQTPVFSK               | 46  | 2997  | 2.40  | 0.11 | 4   |
| 10 F08A8.2           | THIPLK                       | 27  | 7891  | 0.08  | 0.28 | 335 |
| 10 F08A8.2           | GVTVDIGPK                    | 26  | 5512  | 0.14  | 0.28 | 199 |
| 10 F08A8.2           | THIPLK                       | 28  | 8899  | 0.18  | 0.42 | 231 |
| 10 F08A8.2           | THIPLK                       | 24  | 9942  | 7.08  | 0.32 | 5   |
| 1 F08A8.3            | THIPLK                       | 11  | 2575  | 2.20  | 0.26 | 12  |
| 22 F08D12.1          | SILEDLVEVEQQRGNETAATK        | 24  | 1852  | 1.16  | 0.16 | 14  |
| 10 F08D12.1          | LPQALESLEK                   | 31  | 1935  | 2.67  | 0.23 | 9   |
| 1 F08F8.6            | QPSREIMLTPK                  | 15  | 41681 | 0.84  | 0.11 | 13  |
| 1 F08F8.6            | QPSREIMLTPK                  | 10  | 1611  | 1.08  | 0.11 | 10  |
| 22 F09B12.3          | LQFVAQGGPTWKG                | 70  | 2977  | 0.54  | 0.13 | 23  |
| 7 F09B12.3           | EITEISGFIGQAAK               | 73  | 3480  | 0.70  | 0.15 | 22  |
| 10 F09B12.3          | LQFVAQGGPTWKG                | 59  | 2056  | 0.73  | 0.19 | 27  |
| 22 F09B12.3          | FNTLVHK                      | 29  | 7821  | 0.77  | 0.18 | 23  |
| 7 F09B12.3           | FNTLVHK                      | 17  | 2070  | 0.81  | 0.13 | 16  |
| 22 F09B12.3          | LQFVAQGGPTWKG                | 46  | 2629  | 0.90  | 0.14 | 16  |
| 7 F09B12.3           | NGLFYVLEQMPGK                | 44  | 2086  | 0.90  | 0.10 | 11  |
| 22 F09B12.3          | EITEISGFIGQAAK               | 80  | 5657  | 1.06  | 0.06 | 6   |
| 22 F09B12.3          | EITEISGFIGQAAK               | 65  | 3245  | 1.13  | 0.12 | 11  |
| 7 F09B12.3           | NGLFYVLEQMPGK                | 35  | 1549  | 1.20  | 0.11 | 9   |
| 10 F09B12.3          | LQFVAQGGPTWKG                | 65  | 3004  | 1.21  | 0.17 | 14  |
| 22 F09B12.3          | NGLFYVLEQMPGK                | 51  | 2153  | 1.25  | 0.20 | 16  |
| 22 F09B12.3          | NGLFYVLEQMPGK                | 56  | 2563  | 1.27  | 0.17 | 13  |
| 7 F09B12.3           | VNHVGHPPDEWK                 | 16  | 10794 | 1.31  | 0.21 | 16  |
| 10 F09B12.3          | EITEISGFIGQAAK               | 75  | 3029  | 1.34  | 0.22 | 16  |
| 10 F09B12.3          | NGLFYVLEQMPGK                | 77  | 2239  | 1.39  | 0.10 | 7   |
| 7 F09B12.3           | FNTLVHK                      | 47  | 6270  | 1.42  | 0.16 | 11  |
| 22 F09B12.3          | FKPNQPLPK                    | 12  | 17672 | 1.46  | 0.46 | 31  |
| 1 F09B12.3           | TVLTYHLK                     | 18  | 1076  | 1.47  | 0.12 | 8   |
| 22 F09B12.3          | NGLFYVLEQMPGK                | 68  | 3186  | 1.55  | 0.17 | 11  |
| 10 F09B12.3          | NGLFYVLEQMPGK                | 77  | 2658  | 1.58  | 0.15 | 10  |
| 22 F09B12.3          | NGLFYVLEQMPGK                | 76  | 3261  | 1.84  | 0.12 | 6   |
| 10 F09B12.3          | NGLFYVLEQMPGK                | 56  | 2194  | 1.85  | 0.17 | 9   |
| 10 F09B12.3          | TVLTYHLK                     | 23  | 6599  | 1.85  | 0.15 | 8   |
| 10 F09B12.3          | NGLFYVLEQMPGK                | 64  | 2315  | 1.87  | 0.17 | 9   |
| 22 F09B12.3          | FNTLVHK                      | 35  | 8307  | 1.94  | 0.09 | 5   |
| 22 F09B12.3          | FNTLVHK                      | 29  | 3906  | 2.03  | 0.07 | 3   |
| 10 F09B12.3          | TVLTYHLK                     | 18  | 8257  | 2.09  | 0.07 | 3   |
| 10 F09B12.3          | EITEISGFIGQAAK               | 49  | 936   | 2.23  | 0.23 | 10  |
| 1 F09B12.3           | TVLTYHLK                     | 24  | 3308  | 4.27  | 0.26 | 6   |
| 10 F09E10.3          | NVRVNAVLPGFIK                | 28  | 1926  | 0.41  | 0.11 | 28  |
| 10 F09E10.3          | NVRVNAVLPGFIK                | 28  | 2711  | 0.59  | 0.14 | 24  |
| 22 F09E10.3          | NVRVNAVLPGFIK                | 27  | 2554  | 0.62  | 0.09 | 15  |
| 22 F09E10.3          | NVRVNAVLPGFIK                | 18  | 1746  | 0.67  | 0.14 | 20  |
| 10 F09E10.3          | HGARVVVADLDSGNAAATAK         | 105 | 24467 | 0.72  | 0.15 | 21  |
| 1 F09E10.3           | NVRVNAVLPGFIK                | 21  | 1155  | 0.77  | 0.05 | 6   |
| 10 F09E10.3          | HGARVVVADLDSGNAAATAK         | 77  | 22099 | 0.82  | 0.23 | 28  |
| 7 F09E10.3           | NVRVNAVLPGFIK                | 27  | 2035  | 1.13  | 0.11 | 10  |
| 22 F09E10.3          | MGNFGQTNYAATK                | 63  | 2553  | 1.17  | 0.18 | 15  |
| 10 F09E10.3          | HGARVVVADLDSGNAAATAK         | 74  | 10344 | 1.18  | 0.09 | 8   |
| 10 F09E10.3          | HGARVVVADLDSGNAAATAK         | 42  | 5414  | 1.22  | 0.17 | 14  |
| 22 F09E10.3          | MGNFGQTNYAATK                | 40  | 1665  | 1.32  | 0.10 | 7   |
| 7 F09E10.3           | NVRVNAVLPGFIK                | 12  | 1899  | 1.45  | 0.26 | 18  |
| 22 F09E10.3          | HGARVVVADLDSGNAAATAK         | 56  | 9119  | 1.61  | 0.26 | 16  |
| 22 F09E10.3          | NVRVNAVLPGFIK                | 27  | 3700  | 1.65  | 0.16 | 10  |
| 22 F09E10.3          | HGARVVVADLDSGNAAATAK         | 65  | 10064 | 1.69  | 0.13 | 8   |
| 10 F09E10.3          | NVRVNAVLPGFIK                | 24  | 2182  | 1.83  | 0.11 | 6   |
| 1 F09E10.3           | HGARVVVADLDSGNAAATAK         | 61  | 6587  | 1.89  | 0.17 | 9   |
| 1 F09E10.3           | HGARVVVADLDSGNAAATAK         | 68  | 6241  | 2.05  | 0.14 | 7   |
| 1 F09E10.3           | HGARVVVADLDSGNAAATAK         | 29  | 4320  | 2.05  | 0.18 | 9   |
| 22 F09E10.3          | NVRVNAVLPGFIK                | 35  | 2869  | 2.18  | 0.13 | 6   |
| 7 F09E10.3           | HGARVVVADLDSGNAAATAK         | 59  | 15920 | 2.75  | 0.13 | 5   |
| 22 F09E10.3          | HGARVVVADLDSGNAAATAK         | 87  | 9479  | 2.81  | 0.13 | 5   |
| 10 F09E10.3          | HGARVVVADLDSGNAAATAK         | 64  | 16966 | 3.39  | 0.15 | 5   |
| 10 F09E10.3          | HGARVVVADLDSGNAAATAK         | 55  | 15989 | 3.95  | 0.13 | 3   |
| 7 F09E10.3           | HGARVVVADLDSGNAAATAK         | 66  | 9153  | 4.22  | 0.13 | 3   |
| 22 F09E5.15a         | ESQEYFK                      | 32  | 5431  | 0.43  | 0.10 | 23  |
| 22 F09E5.15a         | ESQEYFK                      | 30  | 4512  | 0.54  | 0.09 | 17  |
| 22 F09E5.15a         | ESQEYFK                      | 20  | 2410  | 0.60  | 0.23 | 39  |
| 22 F09E5.15a         | HGGLGEMNIPVLADTNHQISRDTYGVLK | 27  | 26990 | 0.72  | 0.16 | 22  |
| 22 F09E5.15a         | HGGLGEMNIPVLADTNHQISRDTYGVLK | 37  | 34016 | 0.76  | 0.20 | 26  |
| 22 F09E5.15a         | HGGLGEMNIPVLADTNHQISRDTYGVLK | 21  | 10820 | 0.82  | 0.13 | 16  |
| 22 F09E5.15a         | HGGLGEMNIPVLADTNHQISRDTYGVLK | 34  | 14125 | 0.90  | 0.22 | 24  |
| 22 F09E5.15a         | TQAVVDGEFVDVSLSDYK           | 123 | 14110 | 0.98  | 0.08 | 8   |

|                        |                              |     |       |      |      |     |
|------------------------|------------------------------|-----|-------|------|------|-----|
| 22 F09E5.15a           | AFIGKPAPQFK                  | 41  | 20937 | 1.04 | 0.22 | 21  |
| 22 F09E5.15a           | TQAVVDGEFVDVSLSDYK           | 130 | 10714 | 1.23 | 0.13 | 10  |
| 22 F09E5.15a           | TQAVVDGEFVDVSLSDYK           | 28  | 1225  | 1.46 | 0.11 | 7   |
| 22 F09E5.15a           | HGGLGEMNIPVLADTNHQISRDTYGVLK | 24  | 69742 | 1.56 | 0.12 | 8   |
| 22 F09E5.15a           | HGGLGEMNIPVLADTNHQISRDTYGVLK | 15  | 4322  | 1.57 | 0.19 | 12  |
| 22 F09E5.15a           | TQAVVDGEFVDVSLSDYK           | 18  | 1765  | 1.74 | 0.21 | 12  |
| 22 F09E5.15a           | HGEVCPAGWTPGSDTIKPGVK        | 26  | 66526 | 2.01 | 0.15 | 7   |
| 22 F09E5.15a           | HGEVCPAGWTPGSDTIKPGVK        | 35  | 38589 | 2.04 | 0.13 | 6   |
| 22 F09E5.15a           | HGEVCPAGWTPGSDTIKPGVK        | 35  | 70714 | 2.12 | 0.26 | 12  |
| 22 F09E5.15a           | HGEVCPAGWTPGSDTIKPGVK        | 29  | 21714 | 2.29 | 0.13 | 5   |
| 22 F09E5.15a           | HGEVCPAGWTPGSDTIKPGVK        | 12  | 13754 | 2.57 | 0.10 | 4   |
| 22 F09E5.15a           | HGEVCPAGWTPGSDTIKPGVK        | 26  | 76564 | 3.21 | 0.13 | 4   |
| 10 F09E5.15b;F09E5.15a | HGEVCPAGWTPGSDTIKPGVK        | 57  | 10897 | 0.35 | 0.30 | 87  |
| 10 F09E5.15b;F09E5.15a | HGGLGEMNIPVLADTNHQISRDTYGVLK | 31  | 7395  | 0.36 | 0.37 | 103 |
| 7 F09E5.15b;F09E5.15a  | AFIGKPAPQFK                  | 29  | 7004  | 0.45 | 0.16 | 36  |
| 10 F09E5.15b;F09E5.15a | AFIGKPAPQFK                  | 42  | 12407 | 0.47 | 0.15 | 32  |
| 10 F09E5.15b;F09E5.15a | HGEVCPAGWTPGSDTIKPGVK        | 32  | 15598 | 0.56 | 0.34 | 61  |
| 10 F09E5.15b;F09E5.15a | HGGLGEMNIPVLADTNHQISRDTYGVLK | 47  | 9930  | 0.59 | 0.36 | 60  |
| 10 F09E5.15b;F09E5.15a | ESQEYFK                      | 37  | 4141  | 0.66 | 0.16 | 24  |
| 10 F09E5.15b;F09E5.15a | ESQEYFK                      | 35  | 3402  | 0.66 | 0.30 | 45  |
| 10 F09E5.15b;F09E5.15a | HGEVCPAGWTPGSDTIKPGVK        | 47  | 16650 | 0.72 | 0.29 | 40  |
| 1 F09E5.15b;F09E5.15a  | HGGLGEMNIPVLADTNHQISRDTYGVLK | 17  | 9914  | 0.87 | 0.24 | 27  |
| 1 F09E5.15b;F09E5.15a  | HGGLGEMNIPVLADTNHQISRDTYGVLK | 24  | 17038 | 0.88 | 0.16 | 18  |
| 10 F09E5.15b;F09E5.15a | HGGLGEMNIPVLADTNHQISRDTYGVLK | 44  | 46021 | 1.07 | 0.15 | 14  |
| 10 F09E5.15b;F09E5.15a | HGGLGEMNIPVLADTNHQISRDTYGVLK | 22  | 3771  | 1.21 | 0.20 | 17  |
| 1 F09E5.15b;F09E5.15a  | HGGLGEMNIPVLADTNHQISRDTYGVLK | 12  | 7302  | 1.33 | 0.11 | 9   |
| 7 F09E5.15b;F09E5.15a  | HGGLGEMNIPVLADTNHQISRDTYGVLK | 32  | 18246 | 1.36 | 0.11 | 8   |
| 7 F09E5.15b;F09E5.15a  | HGGLGEMNIPVLADTNHQISRDTYGVLK | 15  | 52034 | 1.44 | 0.16 | 11  |
| 7 F09E5.15b;F09E5.15a  | HGGLGEMNIPVLADTNHQISRDTYGVLK | 14  | 12974 | 1.61 | 0.11 | 7   |
| 10 F09E5.15b;F09E5.15a | HGEVCPAGWTPGSDTIKPGVK        | 18  | 9492  | 1.88 | 0.22 | 12  |
| 10 F09E5.15b;F09E5.15a | HGGLGEMNIPVLADTNHQISRDTYGVLK | 21  | 3906  | 1.88 | 0.15 | 8   |
| 1 F09E5.15b;F09E5.15a  | HGEVCPAGWTPGSDTIKPGVK        | 18  | 7783  | 2.91 | 0.20 | 7   |
| 7 F09E5.15b;F09E5.15a  | HGEVCPAGWTPGSDTIKPGVK        | 17  | 9742  | 3.41 | 0.27 | 8   |
| 10 F09E5.15b;F09E5.15a | HGEVCPAGWTPGSDTIKPGVK        | 11  | 5714  | 8.05 | 0.66 | 8   |
| 1 F09E5.15b;F09E5.15a  | AFIGKPAPQFK                  | 50  | 7096  | 8.05 | 0.63 | 8   |
| 10 F09E5.3             | TILATGELK                    | 48  | 5272  | 0.40 | 0.14 | 36  |
| 10 F09E5.3             | TILATGELK                    | 10  | 1912  | 0.53 | 0.15 | 28  |
| 1 F09E5.3              | TILATGELK                    | 24  | 1410  | 0.56 | 0.15 | 27  |
| 22 F09E5.3             | TILATGELK                    | 35  | 2054  | 0.61 | 0.11 | 17  |
| 22 F09E5.3             | LNSNITSVAGGFPSGQYHLK         | 61  | 4507  | 0.62 | 0.16 | 26  |
| 22 F09E5.3             | LNSNITSVAGGFPSGQYHLK         | 54  | 4090  | 0.62 | 0.14 | 22  |
| 22 F09E5.3             | TVDEALSYVALVK                | 60  | 1639  | 0.62 | 0.09 | 15  |
| 22 F09E5.3             | TVDEALSYVALVK                | 46  | 1251  | 0.69 | 0.15 | 22  |
| 1 F09E5.3              | TVDEALSYVALVK                | 42  | 877   | 0.72 | 0.14 | 20  |
| 22 F09E5.3             | TVDEALSYVALVK                | 61  | 1777  | 0.76 | 0.16 | 21  |
| 22 F09E5.3             | TVHDEV LACK                  | 42  | 1939  | 0.78 | 0.15 | 19  |
| 22 F09E5.3             | TVHDEV LACK                  | 36  | 2056  | 0.80 | 0.16 | 21  |
| 1 F09E5.3              | TILATGELK                    | 20  | 1179  | 0.81 | 0.17 | 21  |
| 22 F09E5.3             | LNSNITSVAGGFPSGQYHLK         | 29  | 2189  | 0.87 | 0.14 | 16  |
| 22 F09E5.3             | TVDEALSYVALVK                | 60  | 2006  | 0.87 | 0.17 | 20  |
| 22 F09E5.3             | TILATGELK                    | 19  | 1696  | 0.87 | 0.17 | 19  |
| 1 F09E5.3              | TVDEALSYVALVK                | 48  | 1102  | 0.91 | 0.16 | 18  |
| 1 F09E5.3              | TVDEALSYVALVK                | 48  | 871   | 1.00 | 0.23 | 23  |
| 10 F09E5.3             | VIQYIDLTTLN GDDTASK          | 34  | 1584  | 1.05 | 0.15 | 14  |
| 1 F09E5.3              | VIQYIDLTTLN GDDTASK          | 45  | 1065  | 1.10 | 0.19 | 17  |
| 10 F09E5.3             | RWHELTGK                     | 18  | 7709  | 1.15 | 0.05 | 4   |
| 22 F09E5.3             | RWHELTGK                     | 13  | 4327  | 1.20 | 0.07 | 6   |
| 22 F09E5.3             | TILATGELK                    | 16  | 2722  | 1.21 | 0.12 | 10  |
| 10 F09E5.3             | TILATGELK                    | 13  | 3224  | 1.34 | 0.10 | 7   |
| 10 F09E5.3             | TILATGELK                    | 27  | 3743  | 1.37 | 0.13 | 10  |
| 1 F09E5.3              | VIQYIDLTTLN GDDTASK          | 50  | 1432  | 1.37 | 0.22 | 16  |
| 10 F09E5.3             | RWHELTGK                     | 18  | 6589  | 1.40 | 0.10 | 7   |
| 22 F09E5.3             | TILATGELK                    | 16  | 3023  | 1.40 | 0.13 | 10  |
| 22 F09E5.3             | TILATGELK                    | 29  | 2347  | 1.41 | 0.09 | 7   |
| 1 F09E5.3              | TVDEALSYVALVK                | 38  | 1255  | 1.50 | 0.18 | 12  |
| 1 F09E5.3              | TILATGELK                    | 26  | 2463  | 1.70 | 0.16 | 9   |
| 10 F09E5.3             | VIQYIDLTTLN GDDTASK          | 62  | 1853  | 1.71 | 0.28 | 16  |
| 1 F09E5.3              | TILATGELK                    | 29  | 2989  | 1.78 | 0.08 | 5   |
| 22 F09E5.3             | TILATGELK                    | 24  | 3201  | 1.79 | 0.16 | 9   |
| 22 F09E5.3             | LNSNITSVAGGFPSGQYHLK         | 24  | 1740  | 1.87 | 0.18 | 9   |
| 22 F09E5.3             | TILATGELK                    | 32  | 2850  | 1.93 | 0.13 | 7   |
| 22 F09E5.3             | TILATGELK                    | 11  | 1776  | 2.04 | 0.14 | 7   |
| 1 F09E5.3              | RWHELTGK                     | 14  | 1424  | 2.32 | 0.21 | 9   |
| 7 F09E5.3;Y52B11A.1    | TILATGELK                    | 35  | 2112  | 0.63 | 0.16 | 24  |
| 7 F09E5.3;Y52B11A.1    | LNSNITSVAGGFPSGQYHLK         | 18  | 2291  | 0.69 | 0.16 | 24  |
| 7 F09E5.3;Y52B11A.1    | TVDEALSYVALVK                | 56  | 2239  | 0.69 | 0.07 | 10  |
| 7 F09E5.3;Y52B11A.1    | TVDEALSYVALVK                | 47  | 1662  | 0.78 | 0.16 | 20  |
| 7 F09E5.3;Y52B11A.1    | LNSNITSVAGGFPSGQYHLK         | 18  | 3028  | 0.86 | 0.21 | 25  |
| 7 F09E5.3;Y52B11A.1    | VIQYIDLTTLN GDDTASK          | 19  | 962   | 1.04 | 0.17 | 16  |
| 7 F09E5.3;Y52B11A.1    | TILATGELK                    | 38  | 3629  | 1.18 | 0.10 | 8   |
| 7 F09E5.3;Y52B11A.1    | VIQYIDLTTLN GDDTASK          | 67  | 1095  | 1.57 | 0.16 | 10  |
| 10 F09F7.4a            | NLAQIRDSFK                   | 11  | 1885  | 0.59 | 0.16 | 28  |
| 10 F09F7.4a            | SEILVDTHGSK                  | 47  | 3760  | 0.61 | 0.12 | 19  |
| 10 F09F7.4a            | NLAQIRDSFK                   | 18  | 1732  | 0.64 | 0.12 | 19  |
| 10 F09F7.4a            | SEILVDTHGSK                  | 41  | 4198  | 0.81 | 0.19 | 24  |
| 10 F09F7.4a            | VVTLNRPK                     | 16  | 6765  | 0.99 | 0.19 | 19  |
| 10 F09F7.4a            | VVTLNRPK                     | 34  | 7529  | 1.08 | 0.11 | 10  |
| 10 F09F7.4a            | NLAQIRDSFK                   | 11  | 1710  | 1.12 | 0.05 | 4   |
| 10 F09F7.4a            | SVEEILASLEK                  | 26  | 2151  | 1.18 | 0.12 | 10  |
| 22 F09F7.4a;F09F7.4b   | ELVNIK                       | 20  | 2284  | 0.44 | 0.15 | 34  |
| 22 F09F7.4a;F09F7.4b   | ELVNIK                       | 20  | 3183  | 0.59 | 0.11 | 19  |
| 7 F09F7.4a;F09F7.4b    | NLAQIRDSFK                   | 15  | 1585  | 0.87 | 0.30 | 35  |
| 1 F09F7.4a;F09F7.4b    | NLAQIRDSFK                   | 13  | 1638  | 1.04 | 0.22 | 21  |
| 1 F09F7.4a;F09F7.4b    | SVEEILASLEK                  | 56  | 1136  | 1.07 | 0.15 | 14  |
| 22 F09F7.4a;F09F7.4b   | VVTLNRPK                     | 17  | 7577  | 1.09 | 0.11 | 10  |
| 22 F09F7.4a;F09F7.4b   | VVTLNRPK                     | 35  | 10386 | 1.18 | 0.09 | 8   |
| 1 F09F7.4a;F09F7.4b    | SVEEILASLEK                  | 33  | 1117  | 1.23 | 0.11 | 9   |
| 7 F09F7.4a;F09F7.4b    | VTHRQITEGSK                  | 18  | 2753  | 1.25 | 0.16 | 13  |
| 22 F09F7.4a;F09F7.4b   | VVTLNRPK                     | 31  | 8302  | 1.33 | 0.11 | 8   |
| 22 F09F7.4a;F09F7.4b   | VVTLNRPK                     | 32  | 8605  | 1.38 | 0.12 | 8   |
| 22 F09F7.4a;F09F7.4b   | SEILVDTHGSK                  | 37  | 3212  | 1.49 | 0.15 | 10  |

|                      |                             |    |       |      |      |     |
|----------------------|-----------------------------|----|-------|------|------|-----|
| 22 F09F7.4a;F09F7.4b | SEILVDTHGSK                 | 17 | 3652  | 1.51 | 0.07 | 5   |
| 22 F09G2.9           | VIADSLK                     | 16 | 1849  | 0.83 | 0.11 | 13  |
| 22 F09G2.9           | VIADSLK                     | 19 | 2360  | 1.26 | 0.16 | 13  |
| 22 F09G2.9           | VIADSLK                     | 25 | 3259  | 1.27 | 0.11 | 8   |
| 22 F10B5.1           | HPFHVTRINK                  | 27 | 4277  | 2.79 | 0.35 | 12  |
| 10 F10B5.1           | IRIFDLGNK                   | 26 | 9960  | 8.70 | 0.41 | 5   |
| 22 F10C1.2a;F10C1.2b | LVADLDELRGK                 | 50 | 3351  | 0.89 | 0.18 | 20  |
| 22 F10C1.2a;F10C1.2b | LVADLDELRGK                 | 59 | 4499  | 1.09 | 0.34 | 31  |
| 22 F10C1.2a;F10C1.2b | YSESLSTARK                  | 24 | 4580  | 1.23 | 0.11 | 9   |
| 22 F10C1.2a;F10C1.2b | RVTADNSRIWEELQK             | 12 | 6158  | 1.55 | 0.30 | 19  |
| 7 F10D11.1           | EAIALQPALK                  | 30 | 5863  | 0.25 | 0.44 | 174 |
| 10 F10D11.1          | EAIALQPALK                  | 34 | 19326 | 0.27 | 0.18 | 65  |
| 10 F10D11.1          | DGGEPSAELLTAIK              | 32 | 3500  | 0.37 | 0.16 | 44  |
| 10 F10D11.1          | NVRPDYVNAIWK                | 15 | 6974  | 0.43 | 0.08 | 18  |
| 10 F10D11.1          | DGGEPSAELLTAIK              | 47 | 2903  | 0.44 | 0.19 | 42  |
| 7 F10D11.1           | NVSEFAK                     | 18 | 1770  | 0.45 | 0.14 | 30  |
| 10 F10D11.1          | FNGGGHINHSIFWTNLAK          | 36 | 4686  | 0.49 | 0.38 | 78  |
| 7 F10D11.1           | HHATYVNNLNQIEEK             | 11 | 5269  | 0.56 | 0.23 | 40  |
| 1 F10D11.1           | EAIALQPALK                  | 35 | 6891  | 0.58 | 0.15 | 26  |
| 22 F10D11.1          | EAIALQPALK                  | 37 | 3948  | 0.60 | 0.23 | 38  |
| 10 F10D11.1          | EAIALQPALK                  | 32 | 18750 | 0.64 | 0.12 | 19  |
| 10 F10D11.1          | DGGEPSAELLTAIK              | 37 | 2931  | 0.65 | 0.31 | 47  |
| 10 F10D11.1          | LHEAVSK                     | 28 | 11137 | 0.67 | 0.44 | 65  |
| 1 F10D11.1           | DGGEPSAELLTAIK              | 32 | 2318  | 0.69 | 0.11 | 15  |
| 22 F10D11.1          | FNGGGHINHSIFWTNLAK          | 22 | 7008  | 0.72 | 0.11 | 15  |
| 22 F10D11.1          | EAIALQPALK                  | 62 | 30801 | 0.77 | 0.19 | 25  |
| 22 F10D11.1          | FNGGGHINHSIFWTNLAK          | 17 | 3882  | 0.77 | 0.13 | 17  |
| 10 F10D11.1          | NVSEFAK                     | 25 | 2342  | 0.78 | 0.37 | 47  |
| 22 F10D11.1          | DGGEPSAELLTAIK              | 16 | 1728  | 0.81 | 0.06 | 7   |
| 22 F10D11.1          | EAIALQPALK                  | 57 | 25112 | 0.86 | 0.08 | 10  |
| 1 F10D11.1           | NVSEFAK                     | 16 | 5711  | 0.91 | 0.13 | 14  |
| 10 F10D11.1          | NVSEFAK                     | 21 | 5073  | 0.92 | 0.13 | 14  |
| 7 F10D11.1           | DGGEPSAELLTAIK              | 18 | 2910  | 1.00 | 0.12 | 12  |
| 1 F10D11.1           | NVSEFAK                     | 13 | 4503  | 1.05 | 0.09 | 9   |
| 7 F10D11.1           | EAIALQPALK                  | 22 | 3060  | 1.15 | 0.40 | 35  |
| 10 F10D11.1          | EAIALQPALK                  | 31 | 7790  | 1.23 | 0.36 | 29  |
| 10 F10D11.1          | NVSEFAK                     | 31 | 3731  | 1.37 | 0.15 | 11  |
| 22 F10D11.1          | NVRPDYVNAIWK                | 28 | 13122 | 1.44 | 0.06 | 4   |
| 22 F10D11.1          | NVRPDYVNAIWK                | 28 | 13263 | 1.52 | 0.10 | 6   |
| 1 F10D11.1           | NVSEFAK                     | 13 | 2518  | 1.54 | 0.24 | 16  |
| 22 F10D11.1          | FNGGGHINHSIFWTNLAK          | 23 | 2514  | 1.58 | 0.39 | 25  |
| 1 F10D11.1           | NVSEFAK                     | 20 | 2950  | 1.91 | 0.16 | 8   |
| 22 F10D11.1          | NVSEFAK                     | 11 | 4161  | 2.20 | 0.09 | 4   |
| 10 F10D11.1          | FNGGGHINHSIFWTNLAK          | 27 | 2634  | 2.24 | 0.36 | 16  |
| 7 F10D11.1           | NVSEFAK                     | 13 | 2711  | 2.32 | 0.07 | 3   |
| 10 F10D11.1          | EAIALQPALK                  | 21 | 6401  | 2.40 | 0.38 | 16  |
| 22 F10D11.1          | HHATYVNNLNQIEEK             | 25 | 23698 | 2.64 | 0.13 | 5   |
| 7 F10D11.1           | EAIALQPALK                  | 26 | 5413  | 2.66 | 0.27 | 10  |
| 7 F10D11.1           | EAIALQPALK                  | 25 | 3563  | 2.77 | 0.10 | 3   |
| 22 F10D11.1          | HHATYVNNLNQIEEK             | 32 | 19234 | 2.77 | 0.21 | 8   |
| 7 F10D11.1           | HHATYVNNLNQIEEK             | 22 | 5946  | 2.81 | 0.20 | 7   |
| 22 F10D11.1          | HHATYVNNLNQIEEK             | 32 | 19733 | 3.10 | 0.13 | 4   |
| 22 F10D11.1          | HHATYVNNLNQIEEK             | 34 | 10246 | 3.25 | 0.14 | 4   |
| 1 F10D11.1           | HHATYVNNLNQIEEK             | 29 | 17457 | 3.65 | 0.20 | 5   |
| 7 F10D11.1           | HHATYVNNLNQIEEK             | 41 | 14958 | 3.83 | 0.19 | 5   |
| 1 F10D11.1           | HHATYVNNLNQIEEK             | 42 | 7391  | 4.55 | 0.24 | 5   |
| 1 F10D11.1           | HHATYVNNLNQIEEK             | 38 | 5114  | 4.61 | 0.17 | 4   |
| 10 F10D11.1          | NVSEFAK                     | 19 | 4062  | 5.79 | 0.09 | 2   |
| 10 F10D11.1          | NVSEFAK                     | 23 | 4891  | 7.96 | 0.18 | 2   |
| 22 F10G7.2           | DTHRIQITGDLAK               | 30 | 6821  | 0.08 | 0.23 | 297 |
| 22 F10G7.2           | GARVGPGGVSTGAAEPFADEAAAFTRK | 90 | 3054  | 0.08 | 0.26 | 317 |
| 22 F10G7.2           | LLELQEQAK                   | 38 | 1528  | 0.17 | 0.55 | 318 |
| 22 F10G7.2           | GARVGPGGVSTGAAEPFADEAAAFTRK | 68 | 5369  | 0.18 | 0.45 | 257 |
| 22 F10G7.2           | LLELQEQAK                   | 34 | 1147  | 0.26 | 0.37 | 140 |
| 1 F10G7.2            | LLELQEQAK                   | 42 | 3194  | 0.30 | 0.15 | 51  |
| 1 F10G7.2            | LLELQEQAK                   | 47 | 3538  | 0.30 | 0.13 | 43  |
| 22 F10G7.2           | LLELQEQAK                   | 48 | 3813  | 0.30 | 0.18 | 60  |
| 10 F10G7.2           | LLELQEQAK                   | 24 | 2379  | 0.32 | 0.22 | 69  |
| 1 F10G7.2            | LLELQEQAK                   | 26 | 617   | 0.37 | 0.32 | 84  |
| 22 F10G7.2           | GARVGPGGVSTGAAEPFADEAAAFTRK | 40 | 1580  | 0.38 | 0.47 | 126 |
| 10 F10G7.2           | LLELQEQAK                   | 31 | 4308  | 0.40 | 0.10 | 25  |
| 10 F10G7.2           | LLELQEQAK                   | 26 | 900   | 0.43 | 0.17 | 39  |
| 22 F10G7.2           | IGDQNIAGLISRGLSK            | 38 | 1586  | 0.46 | 0.13 | 29  |
| 1 F10G7.2            | DTHRIQITGDLAK               | 20 | 2791  | 0.48 | 0.19 | 40  |
| 10 F10G7.2           | IGDQNIAGLISRGLSK            | 28 | 1703  | 0.49 | 0.13 | 26  |
| 10 F10G7.2           | IGDQNIAGLISRGLSK            | 27 | 1179  | 0.50 | 0.08 | 15  |
| 22 F10G7.2           | IGDQNIAGLISRGLSK            | 24 | 1020  | 0.52 | 0.41 | 80  |
| 10 F10G7.2           | IGDQNIAGLISRGLSK            | 13 | 837   | 0.57 | 0.15 | 27  |
| 10 F10G7.2           | LLELQEQAK                   | 21 | 788   | 0.58 | 0.13 | 23  |
| 1 F10G7.2            | DTHRIQITGDLAK               | 15 | 3035  | 0.58 | 0.13 | 23  |
| 10 F10G7.2           | IGDQNIAGLISRGLSK            | 35 | 1336  | 0.61 | 0.23 | 37  |
| 1 F10G7.2            | LLELQEQAK                   | 16 | 525   | 0.64 | 0.10 | 16  |
| 22 F10G7.2           | LLELQEQAK                   | 65 | 5014  | 0.65 | 0.15 | 22  |
| 10 F10G7.2           | IGDQNIAGLISRGLSK            | 15 | 607   | 0.67 | 0.26 | 39  |
| 10 F10G7.2           | IGDQNIAGLISRGLSK            | 10 | 871   | 0.70 | 0.20 | 28  |
| 10 F10G7.2           | LLELQEQAK                   | 29 | 2723  | 0.72 | 0.11 | 16  |
| 22 F10G7.2           | IGDQNIAGLISRGLSK            | 28 | 1674  | 0.74 | 0.17 | 23  |
| 22 F10G7.2           | GNIAESLLREGYAK              | 58 | 2870  | 0.87 | 0.12 | 14  |
| 10 F10G7.2           | LLELQEQAK                   | 11 | 2030  | 0.88 | 0.12 | 14  |
| 22 F10G7.2           | LLELQEQAK                   | 34 | 2603  | 0.88 | 0.11 | 12  |
| 22 F10G7.2           | LLELQEQAK                   | 56 | 5185  | 0.88 | 0.08 | 9   |
| 22 F10G7.2           | GARVGPGGVSTGAAEPFADEAAAFTRK | 57 | 4016  | 0.89 | 0.13 | 14  |
| 22 F10G7.2           | GARVGPGGVSTGAAEPFADEAAAFTRK | 50 | 4599  | 0.90 | 0.08 | 9   |
| 10 F10G7.2           | GNIAESLLREGYAK              | 42 | 2082  | 0.90 | 0.12 | 13  |
| 10 F10G7.2           | GARVGPGGVSTGAAEPFADEAAAFTRK | 53 | 3449  | 0.91 | 0.12 | 13  |
| 1 F10G7.2            | GNIAESLLREGYAK              | 17 | 519   | 0.94 | 0.23 | 24  |
| 10 F10G7.2           | LLELQEQAK                   | 55 | 3246  | 0.96 | 0.11 | 11  |
| 22 F10G7.2           | GNIAESLLREGYAK              | 38 | 2243  | 0.97 | 0.15 | 15  |
| 10 F10G7.2           | GARVGPGGVSTGAAEPFADEAAAFTRK | 37 | 2786  | 1.01 | 0.15 | 15  |
| 22 F10G7.2           | GNIAESLLREGYAK              | 45 | 2731  | 1.05 | 0.09 | 9   |
| 22 F10G7.2           | GNIAESLLREGYAK              | 60 | 2571  | 1.05 | 0.12 | 11  |

|            |                             |     |       |      |      |     |
|------------|-----------------------------|-----|-------|------|------|-----|
| 1 F10G7.2  | GNIAESLLREGYAK              | 23  | 420   | 1.09 | 0.17 | 15  |
| 22 F10G7.2 | LLELQEQAK                   | 41  | 2751  | 1.15 | 0.10 | 9   |
| 22 F10G7.2 | LLELQEQAK                   | 21  | 2052  | 1.17 | 0.09 | 8   |
| 10 F10G7.2 | DTHRIQEITGDLAK              | 19  | 7291  | 1.18 | 0.04 | 4   |
| 10 F10G7.2 | GARVGPGGVSTGAAEPFADEAAAFTRK | 52  | 3255  | 1.22 | 0.20 | 16  |
| 1 F10G7.2  | LLELQEQAK                   | 59  | 2460  | 1.24 | 0.17 | 14  |
| 10 F10G7.2 | GARVGPGGVSTGAAEPFADEAAAFTRK | 63  | 3053  | 1.28 | 0.19 | 15  |
| 10 F10G7.2 | DTHRIQEITGDLAK              | 21  | 4539  | 1.32 | 0.07 | 5   |
| 1 F10G7.2  | LLELQEQAK                   | 26  | 440   | 1.38 | 0.06 | 4   |
| 10 F10G7.2 | GNIAESLLREGYAK              | 36  | 1666  | 1.41 | 0.12 | 8   |
| 1 F10G7.2  | GARVGPGGVSTGAAEPFADEAAAFTRK | 34  | 1034  | 1.55 | 0.16 | 10  |
| 1 F10G7.2  | LLELQEQAK                   | 39  | 1594  | 1.64 | 0.12 | 7   |
| 10 F10G7.2 | GNIAESLLREGYAK              | 47  | 2182  | 1.66 | 0.16 | 10  |
| 10 F10G7.2 | GNIAESLLREGYAK              | 55  | 2003  | 1.77 | 0.14 | 8   |
| 10 F10G7.2 | SYQPTSSAYSGDRK              | 17  | 1777  | 1.85 | 0.12 | 6   |
| 22 F10G7.2 | DTHRIQEITGDLAK              | 20  | 4679  | 2.04 | 0.18 | 9   |
| 10 F10G7.2 | LLELQEQAK                   | 11  | 1104  | 2.47 | 0.16 | 7   |
| 10 F10G7.2 | LLELQEQAK                   | 20  | 536   | 2.67 | 0.22 | 8   |
| 22 F10G7.2 | DTHRIQEITGDLAK              | 22  | 6275  | 3.24 | 0.17 | 5   |
| 22 F10G7.2 | LLELQEQAK                   | 37  | 1944  | 3.37 | 0.22 | 7   |
| 22 F10G7.2 | GNIAESLLREGYAK              | 56  | 1952  | 4.32 | 0.26 | 6   |
| 22 F10G7.2 | GNIAESLLREGYAK              | 60  | 2005  | 5.86 | 0.07 | 1   |
| 22 F10G7.2 | GARVGPGGVSTGAAEPFADEAAAFTRK | 102 | 7230  | 6.79 | 0.39 | 6   |
| 22 F10G7.2 | GARVGPGGVSTGAAEPFADEAAAFTRK | 88  | 7372  | 6.79 | 0.19 | 3   |
| 7 F10G7.8  | VSHLILK                     | 32  | 1301  | 0.24 | 0.16 | 64  |
| 1 F10G7.8  | LIETLRTVTAGK                | 16  | 716   | 0.45 | 0.22 | 49  |
| 22 F10G7.8 | LIETLRTVTAGK                | 38  | 1686  | 0.61 | 0.13 | 22  |
| 10 F10G7.8 | LIETLRTVTAGK                | 30  | 1807  | 0.62 | 0.09 | 14  |
| 10 F10G7.8 | LIETLRTVTAGK                | 34  | 1692  | 0.66 | 0.09 | 14  |
| 22 F10G7.8 | LIETLRTVTAGK                | 11  | 738   | 0.66 | 0.20 | 31  |
| 7 F10G7.8  | DAVAAVESLNNIEK              | 76  | 3246  | 0.69 | 0.10 | 15  |
| 22 F10G7.8 | DAVAAVESLNNIEK              | 78  | 3072  | 0.70 | 0.21 | 30  |
| 10 F10G7.8 | LIETLRTVTAGK                | 24  | 1407  | 0.74 | 0.11 | 15  |
| 22 F10G7.8 | DAVAAVESLNNIEK              | 54  | 3070  | 0.78 | 0.25 | 32  |
| 1 F10G7.8  | DAVAAVESLNNIEK              | 63  | 1936  | 0.79 | 0.18 | 23  |
| 10 F10G7.8 | DAVAAVESLNNIEK              | 81  | 3218  | 0.79 | 0.12 | 15  |
| 1 F10G7.8  | VSHLILK                     | 28  | 4274  | 0.81 | 0.08 | 10  |
| 10 F10G7.8 | LIETLRTVTAGK                | 27  | 1233  | 0.81 | 0.12 | 15  |
| 1 F10G7.8  | LIETLRTVTAGK                | 44  | 655   | 0.82 | 0.13 | 16  |
| 22 F10G7.8 | VSHLILK                     | 37  | 16979 | 0.86 | 0.07 | 8   |
| 10 F10G7.8 | DAVAAVESLNNIEK              | 62  | 3137  | 0.95 | 0.13 | 14  |
| 22 F10G7.8 | VSHLILK                     | 41  | 5471  | 1.03 | 0.08 | 8   |
| 7 F10G7.8  | VSHLILK                     | 40  | 4575  | 1.03 | 0.12 | 11  |
| 1 F10G7.8  | VSHLILK                     | 47  | 4376  | 1.08 | 0.09 | 8   |
| 22 F10G7.8 | VSHLILK                     | 24  | 20578 | 1.09 | 0.06 | 5   |
| 1 F10G7.8  | VSHLILK                     | 21  | 2766  | 1.09 | 0.10 | 9   |
| 7 F10G7.8  | LIETLRTVTAGK                | 21  | 1125  | 1.10 | 0.18 | 16  |
| 10 F10G7.8 | VSHLILK                     | 44  | 24365 | 1.18 | 0.06 | 5   |
| 22 F10G7.8 | VSHLILK                     | 23  | 5892  | 1.19 | 0.09 | 8   |
| 7 F10G7.8  | LIETLRTVTAGK                | 12  | 1107  | 1.23 | 0.19 | 15  |
| 1 F10G7.8  | VSHLILK                     | 39  | 8194  | 1.24 | 0.08 | 6   |
| 1 F10G7.8  | VSHLILK                     | 25  | 2174  | 1.27 | 0.07 | 6   |
| 10 F10G7.8 | VSHLILK                     | 44  | 19703 | 1.35 | 0.09 | 7   |
| 1 F10G7.8  | VSHLILK                     | 37  | 9111  | 1.44 | 0.08 | 6   |
| 1 F10G7.8  | VSHLILK                     | 17  | 6460  | 1.45 | 0.10 | 7   |
| 7 F10G7.8  | VSHLILK                     | 10  | 2880  | 1.63 | 0.14 | 9   |
| 7 F10G7.8  | VSHLILK                     | 34  | 9834  | 1.68 | 0.06 | 4   |
| 7 F10G7.8  | VSHLILK                     | 51  | 6933  | 2.05 | 0.07 | 3   |
| 7 F10G7.8  | LLRRGTTSPDTGIFDK            | 10  | 5592  | 2.47 | 0.16 | 7   |
| 10 F10G7.8 | VSHLILK                     | 29  | 5928  | 2.98 | 0.08 | 3   |
| 10 F11C3.3 | QRPREEQAEPDGTDEAEK          | 16  | 836   | 0.14 | 0.20 | 146 |
| 10 F11C3.3 | ALEDSEK                     | 23  | 1831  | 0.16 | 0.40 | 256 |
| 10 F11C3.3 | QVEEAELANLNLQK              | 79  | 3534  | 0.19 | 0.31 | 162 |
| 10 F11C3.3 | QVEEAELANLNLQK              | 79  | 2985  | 0.22 | 0.16 | 72  |
| 10 F11C3.3 | INELQEALDAANSK              | 55  | 2136  | 0.22 | 0.15 | 68  |
| 10 F11C3.3 | INELQEALDAANSK              | 76  | 1686  | 0.27 | 0.16 | 58  |
| 10 F11C3.3 | VLRAQVEVSQIRSEIEK           | 31  | 7214  | 0.29 | 0.62 | 214 |
| 10 F11C3.3 | EELLVANEAAERARK             | 25  | 11231 | 0.32 | 0.38 | 121 |
| 10 F11C3.3 | IIDEWRK                     | 28  | 5548  | 0.32 | 0.14 | 45  |
| 10 F11C3.3 | RATLLQSEK                   | 36  | 7420  | 0.34 | 0.08 | 22  |
| 10 F11C3.3 | ARFEGEGLLK                  | 25  | 2180  | 0.35 | 0.07 | 19  |
| 10 F11C3.3 | IIDEWRK                     | 22  | 4584  | 0.35 | 0.13 | 37  |
| 10 F11C3.3 | GLEQQLK                     | 31  | 6196  | 0.35 | 0.38 | 108 |
| 10 F11C3.3 | TSLFTNLESTK                 | 21  | 830   | 0.36 | 0.20 | 56  |
| 10 F11C3.3 | ARFEGEGLLK                  | 24  | 3360  | 0.36 | 0.29 | 83  |
| 10 F11C3.3 | EIQVRLDEAEAAALK             | 50  | 2823  | 0.36 | 0.18 | 50  |
| 10 F11C3.3 | DLTDQLGEGGRSVHEMQK          | 25  | 5145  | 0.37 | 0.63 | 168 |
| 10 F11C3.3 | EIQVRLDEAEAAALK             | 49  | 2495  | 0.38 | 0.16 | 42  |
| 10 F11C3.3 | ADEQSRQLQDFTSLK             | 13  | 1827  | 0.38 | 0.15 | 39  |
| 7 F11C3.3  | TQLSDAEERLAK                | 31  | 2337  | 0.38 | 0.22 | 57  |
| 10 F11C3.3 | EELLVANEAAERARK             | 20  | 15411 | 0.39 | 0.27 | 70  |
| 10 F11C3.3 | TSLFTNLESTK                 | 24  | 929   | 0.41 | 0.18 | 44  |
| 10 F11C3.3 | ARFEGEGLLK                  | 13  | 1189  | 0.45 | 0.26 | 58  |
| 10 F11C3.3 | AGVLAHLEDIRDEK              | 13  | 3420  | 0.47 | 0.06 | 14  |
| 10 F11C3.3 | GLEQQLK                     | 32  | 4058  | 0.47 | 0.26 | 55  |
| 10 F11C3.3 | ESELHSVSSRLEDEQALVSK        | 21  | 2847  | 0.47 | 0.15 | 33  |
| 10 F11C3.3 | NEILRQLSK                   | 21  | 1703  | 0.51 | 0.20 | 40  |
| 10 F11C3.3 | DHQIRSLQDEMQQQDEAIAK        | 36  | 1962  | 0.52 | 0.18 | 34  |
| 10 F11C3.3 | AELLRIK                     | 23  | 1980  | 0.53 | 0.28 | 52  |
| 10 F11C3.3 | AGVLAHLEDIRDEK              | 11  | 2338  | 0.53 | 0.20 | 37  |
| 10 F11C3.3 | SDLQRELEELGEK               | 36  | 1873  | 0.54 | 0.11 | 20  |
| 10 F11C3.3 | SDLQRELEELGEK               | 24  | 1719  | 0.55 | 0.13 | 24  |
| 22 F11C3.3 | LDEQGGATAAQVEVNK            | 57  | 1429  | 0.55 | 0.06 | 11  |
| 22 F11C3.3 | QLTHQLEDAEERADQAENSLSK      | 18  | 4112  | 0.57 | 0.10 | 18  |
| 22 F11C3.3 | EELLVANEAAERARK             | 10  | 12175 | 0.57 | 0.16 | 29  |
| 22 F11C3.3 | TQLSDAEERLAK                | 27  | 2465  | 0.57 | 0.09 | 16  |
| 22 F11C3.3 | TQLSDAEERLAK                | 41  | 2767  | 0.59 | 0.13 | 21  |
| 10 F11C3.3 | QIQDLEMSLRK                 | 16  | 858   | 0.60 | 0.20 | 33  |
| 10 F11C3.3 | LVDQHLGK                    | 39  | 6327  | 0.62 | 0.14 | 23  |
| 10 F11C3.3 | TQLSDAEERLAK                | 19  | 2088  | 0.63 | 0.10 | 15  |
| 10 F11C3.3 | SDLQRELEELGEK               | 24  | 1880  | 0.64 | 0.11 | 18  |

|            |                         |    |      |      |      |    |
|------------|-------------------------|----|------|------|------|----|
| 10 F11C3.3 | SDLQRELEELGEK           | 12 | 1268 | 0.65 | 0.19 | 30 |
| 10 F11C3.3 | LVDQHLGK                | 56 | 7210 | 0.66 | 0.09 | 14 |
| 10 F11C3.3 | ATDLTLASK               | 41 | 2592 | 0.69 | 0.12 | 18 |
| 10 F11C3.3 | ATDLTLASK               | 56 | 2259 | 0.70 | 0.10 | 14 |
| 10 F11C3.3 | DHQIRSLQDEMQQQDEAIAK    | 28 | 1570 | 0.70 | 0.13 | 19 |
| 10 F11C3.3 | IIDEWRK                 | 13 | 1799 | 0.71 | 0.10 | 14 |
| 22 F11C3.3 | INELQEALDAANSK          | 62 | 2932 | 0.73 | 0.07 | 10 |
| 22 F11C3.3 | LVDQHLGK                | 25 | 5192 | 0.73 | 0.13 | 18 |
| 10 F11C3.3 | ARFEGEGLLK              | 33 | 1307 | 0.75 | 0.21 | 27 |
| 1 F11C3.3  | RATLLQSEK               | 23 | 1678 | 0.75 | 0.24 | 32 |
| 10 F11C3.3 | TQLSDAEERLAK            | 28 | 1804 | 0.76 | 0.08 | 11 |
| 10 F11C3.3 | NEILRQLSK               | 16 | 1388 | 0.77 | 0.07 | 10 |
| 10 F11C3.3 | TQLSDAEERLAK            | 17 | 3033 | 0.77 | 0.15 | 20 |
| 7 F11C3.3  | TSLFTNLESTK             | 31 | 1047 | 0.77 | 0.12 | 15 |
| 7 F11C3.3  | TSLFTNLESTK             | 41 | 1330 | 0.80 | 0.13 | 16 |
| 10 F11C3.3 | AELLRIK                 | 12 | 861  | 0.82 | 0.40 | 49 |
| 10 F11C3.3 | TQLSDAEERLAK            | 54 | 3298 | 0.82 | 0.11 | 14 |
| 10 F11C3.3 | LVDQHLGK                | 19 | 4799 | 0.83 | 0.16 | 19 |
| 22 F11C3.3 | ELLLDLPIK               | 13 | 1798 | 0.84 | 0.05 | 6  |
| 1 F11C3.3  | SDLQRELEELGEK           | 12 | 715  | 0.84 | 0.13 | 15 |
| 1 F11C3.3  | TSLFTNLESTK             | 25 | 633  | 0.85 | 0.23 | 28 |
| 1 F11C3.3  | TQLSDAEERLAK            | 10 | 1433 | 0.85 | 0.19 | 22 |
| 10 F11C3.3 | LVDQHLGK                | 42 | 2680 | 0.85 | 0.18 | 21 |
| 10 F11C3.3 | LVDQHLGK                | 58 | 5148 | 0.86 | 0.12 | 15 |
| 1 F11C3.3  | AELLRIK                 | 21 | 1910 | 0.86 | 0.13 | 15 |
| 1 F11C3.3  | NEILRQLSK               | 17 | 740  | 0.87 | 0.21 | 24 |
| 7 F11C3.3  | ARFEGEGLLK              | 10 | 1158 | 0.87 | 0.05 | 6  |
| 10 F11C3.3 | HTDAVAELTDQLDQLNK       | 38 | 1855 | 0.88 | 0.18 | 21 |
| 10 F11C3.3 | LVDQHLGK                | 49 | 3483 | 0.89 | 0.13 | 15 |
| 10 F11C3.3 | DHQIRSLQDEMQQQDEAIAK    | 25 | 967  | 0.89 | 0.20 | 23 |
| 10 F11C3.3 | TQLSDAEERLAK            | 42 | 2939 | 0.90 | 0.24 | 26 |
| 7 F11C3.3  | ARFEGEGLLK              | 21 | 1552 | 0.91 | 0.08 | 9  |
| 10 F11C3.3 | NHARALESMQASLETEAK      | 15 | 1688 | 0.92 | 0.08 | 9  |
| 10 F11C3.3 | HTDAVAELTDQLDQLNK       | 25 | 1477 | 0.93 | 0.27 | 29 |
| 22 F11C3.3 | IIDEWRK                 | 13 | 4082 | 0.94 | 0.06 | 6  |
| 22 F11C3.3 | QLTHQLEDAEERADQAENSLSK  | 31 | 4026 | 0.95 | 0.11 | 12 |
| 10 F11C3.3 | IIRLEIEK                | 16 | 3574 | 0.95 | 0.42 | 44 |
| 22 F11C3.3 | INELQEALDAANSK          | 48 | 1755 | 0.96 | 0.14 | 14 |
| 1 F11C3.3  | IIDEWRK                 | 12 | 800  | 0.97 | 0.15 | 16 |
| 10 F11C3.3 | NHARALESMQASLETEAK      | 49 | 3815 | 0.97 | 0.13 | 13 |
| 22 F11C3.3 | QVEEAEEELANLNLQK        | 65 | 1808 | 0.98 | 0.17 | 17 |
| 1 F11C3.3  | TSLFTNLESTK             | 15 | 670  | 0.99 | 0.14 | 14 |
| 7 F11C3.3  | LVDQHLGK                | 46 | 2789 | 0.99 | 0.11 | 11 |
| 22 F11C3.3 | DHQIRSLQDEMQQQDEAIAK    | 27 | 969  | 1.00 | 0.23 | 23 |
| 22 F11C3.3 | EIQVRLDEAEAAAALK        | 56 | 2257 | 1.01 | 0.12 | 12 |
| 10 F11C3.3 | ARFEGEGLLK              | 14 | 1234 | 1.02 | 0.05 | 4  |
| 1 F11C3.3  | SDLQRELEELGEK           | 20 | 1057 | 1.04 | 0.19 | 18 |
| 22 F11C3.3 | QVEEAEEELANLNLQK        | 60 | 2486 | 1.04 | 0.18 | 17 |
| 10 F11C3.3 | AGVLAHLEDIRDEK          | 12 | 1792 | 1.04 | 0.10 | 9  |
| 1 F11C3.3  | ARFEGEGLLK              | 28 | 2357 | 1.05 | 0.12 | 12 |
| 10 F11C3.3 | DLTDQLGEGGRSVHEMQK      | 24 | 6195 | 1.05 | 0.68 | 64 |
| 10 F11C3.3 | DHQIRSLQDEMQQQDEAIAK    | 20 | 813  | 1.06 | 0.24 | 23 |
| 10 F11C3.3 | NHARALESMQASLETEAK      | 35 | 3498 | 1.07 | 0.15 | 14 |
| 1 F11C3.3  | NHARALESMQASLETEAK      | 59 | 3118 | 1.07 | 0.16 | 15 |
| 22 F11C3.3 | LDEQQGATAAQVEVVK        | 86 | 1007 | 1.08 | 0.20 | 18 |
| 1 F11C3.3  | ARFEGEGLLK              | 14 | 591  | 1.08 | 0.29 | 27 |
| 22 F11C3.3 | QLSELNDQLADNEDRTADVQRAK | 17 | 2728 | 1.11 | 0.19 | 17 |
| 10 F11C3.3 | ARFEGEGLLK              | 22 | 995  | 1.12 | 0.20 | 17 |
| 10 F11C3.3 | LVDQHLGK                | 49 | 4606 | 1.15 | 0.11 | 10 |
| 22 F11C3.3 | IIDEWRK                 | 18 | 4802 | 1.16 | 0.08 | 7  |
| 1 F11C3.3  | RATLLQSEK               | 25 | 2631 | 1.16 | 0.23 | 20 |
| 22 F11C3.3 | RATLLQSEK               | 35 | 1186 | 1.17 | 0.13 | 12 |
| 22 F11C3.3 | TSLFTNLESTK             | 13 | 776  | 1.17 | 0.10 | 9  |
| 1 F11C3.3  | QFELQLTELQSK            | 40 | 861  | 1.17 | 0.24 | 20 |
| 22 F11C3.3 | SLSQEIK                 | 13 | 1119 | 1.18 | 0.13 | 11 |
| 22 F11C3.3 | EIQVRLDEAEAAAALK        | 72 | 1528 | 1.20 | 0.15 | 13 |
| 1 F11C3.3  | SDLQRELEELGEK           | 21 | 1172 | 1.20 | 0.11 | 9  |
| 1 F11C3.3  | IIDEWRK                 | 24 | 2288 | 1.21 | 0.09 | 8  |
| 1 F11C3.3  | IIDEWRK                 | 23 | 2270 | 1.23 | 0.11 | 9  |
| 22 F11C3.3 | ATDLTLASK               | 32 | 1126 | 1.24 | 0.16 | 13 |
| 1 F11C3.3  | IIDEWRK                 | 10 | 1060 | 1.24 | 0.11 | 9  |
| 22 F11C3.3 | ESELHSVSSRLEDEQALVSK    | 20 | 4082 | 1.26 | 0.16 | 13 |
| 10 F11C3.3 | TQLSDAEERLAK            | 14 | 2149 | 1.26 | 0.13 | 11 |
| 22 F11C3.3 | LVDQHLGK                | 37 | 2194 | 1.27 | 0.08 | 6  |
| 22 F11C3.3 | TQLSDAEERLAK            | 16 | 3272 | 1.27 | 0.08 | 7  |
| 10 F11C3.3 | EIQVRLDEAEAAAALK        | 37 | 1387 | 1.27 | 0.29 | 23 |
| 7 F11C3.3  | ARFEGEGLLK              | 20 | 2614 | 1.27 | 0.19 | 15 |
| 1 F11C3.3  | QFELQLTELQSK            | 45 | 689  | 1.28 | 0.19 | 15 |
| 7 F11C3.3  | ARFEGEGLLK              | 16 | 1079 | 1.31 | 0.24 | 18 |
| 22 F11C3.3 | DHQIRSLQDEMQQQDEAIAK    | 31 | 839  | 1.31 | 0.32 | 24 |
| 7 F11C3.3  | LVDQHLGK                | 46 | 2535 | 1.32 | 0.05 | 4  |
| 22 F11C3.3 | QLSELNDQLADNEDRTADVQRAK | 27 | 2078 | 1.33 | 0.27 | 20 |
| 22 F11C3.3 | QVEEAEEELANLNLQK        | 73 | 2346 | 1.33 | 0.16 | 12 |
| 22 F11C3.3 | SDLQRELEELGEK           | 32 | 2420 | 1.34 | 0.13 | 10 |
| 22 F11C3.3 | DHQIRSLQDEMQQQDEAIAK    | 42 | 1071 | 1.36 | 0.33 | 24 |
| 22 F11C3.3 | SDLQRELEELGEK           | 15 | 1941 | 1.36 | 0.11 | 8  |
| 1 F11C3.3  | NHARALESMQASLETEAK      | 51 | 4509 | 1.37 | 0.21 | 15 |
| 1 F11C3.3  | NHARALESMQASLETEAK      | 63 | 4771 | 1.40 | 0.13 | 10 |
| 1 F11C3.3  | NEILRQLSK               | 24 | 796  | 1.41 | 0.13 | 9  |
| 22 F11C3.3 | AELLRIK                 | 19 | 2233 | 1.41 | 0.08 | 6  |
| 22 F11C3.3 | ATDLTLASK               | 42 | 2227 | 1.41 | 0.12 | 9  |
| 10 F11C3.3 | TSLFTNLESTK             | 13 | 1208 | 1.43 | 0.19 | 13 |
| 7 F11C3.3  | ARFEGEGLLK              | 20 | 1729 | 1.44 | 0.19 | 13 |
| 1 F11C3.3  | TQLSDAEERLAK            | 37 | 1645 | 1.45 | 0.28 | 19 |
| 22 F11C3.3 | TSLFTNLESTK             | 31 | 1447 | 1.47 | 0.11 | 7  |
| 1 F11C3.3  | RATLLQSEK               | 10 | 1339 | 1.49 | 0.12 | 8  |
| 1 F11C3.3  | LVDQHLGK                | 45 | 3456 | 1.50 | 0.06 | 4  |
| 22 F11C3.3 | SLSQEIK                 | 17 | 739  | 1.50 | 0.16 | 11 |
| 10 F11C3.3 | RATLLQSEK               | 29 | 1640 | 1.51 | 0.08 | 5  |
| 7 F11C3.3  | TSLFTNLESTK             | 30 | 1211 | 1.51 | 0.15 | 10 |
| 1 F11C3.3  | RATLLQSEK               | 17 | 633  | 1.53 | 0.22 | 15 |

|             |                      |    |      |      |      |     |
|-------------|----------------------|----|------|------|------|-----|
| 22 F11C3.3  | SDLQRELEELGEK        | 43 | 2172 | 1.54 | 0.13 | 9   |
| 1 F11C3.3   | HTDAVAELTDQLDQLNK    | 23 | 1417 | 1.54 | 0.25 | 17  |
| 1 F11C3.3   | NHARALESMQASLETEAK   | 52 | 1826 | 1.57 | 0.10 | 6   |
| 22 F11C3.3  | ARFEGEGLLK           | 11 | 1123 | 1.58 | 0.29 | 18  |
| 7 F11C3.3   | LVDQHLGK             | 38 | 2167 | 1.61 | 0.18 | 11  |
| 10 F11C3.3  | TSLFTNLESTK          | 18 | 1074 | 1.63 | 0.13 | 8   |
| 7 F11C3.3   | TSLFTNLESTK          | 20 | 891  | 1.63 | 0.12 | 7   |
| 1 F11C3.3   | NFERLQDLIDK          | 12 | 1055 | 1.64 | 0.32 | 20  |
| 22 F11C3.3  | NEILRQLSK            | 13 | 2074 | 1.66 | 0.11 | 7   |
| 7 F11C3.3   | LVDQHLGK             | 35 | 1679 | 1.67 | 0.13 | 8   |
| 22 F11C3.3  | LVDQHLGK             | 55 | 2716 | 1.67 | 0.11 | 7   |
| 22 F11C3.3  | AGVLAHLEDIRDEK       | 12 | 4180 | 1.67 | 0.05 | 3   |
| 1 F11C3.3   | ARFEGEGLLK           | 29 | 582  | 1.69 | 0.12 | 7   |
| 10 F11C3.3  | RATLLQSEK            | 34 | 1904 | 1.73 | 0.20 | 12  |
| 22 F11C3.3  | LVDQHLGK             | 31 | 2932 | 1.75 | 0.13 | 7   |
| 1 F11C3.3   | ATDLTLASK            | 31 | 749  | 1.75 | 0.17 | 10  |
| 1 F11C3.3   | TQLSDAEERLAK         | 32 | 892  | 1.75 | 0.13 | 8   |
| 1 F11C3.3   | TQLSDAEERLAK         | 46 | 1533 | 1.78 | 0.15 | 8   |
| 22 F11C3.3  | TQLSDAEERLAK         | 37 | 1992 | 1.79 | 0.04 | 2   |
| 1 F11C3.3   | TQLSDAEERLAK         | 13 | 1291 | 1.79 | 0.29 | 16  |
| 1 F11C3.3   | LVDQHLGK             | 30 | 3139 | 1.80 | 0.13 | 7   |
| 22 F11C3.3  | RATLLQSEK            | 16 | 1403 | 1.82 | 0.16 | 9   |
| 22 F11C3.3  | TQLSDAEERLAK         | 50 | 2121 | 1.85 | 0.15 | 8   |
| 10 F11C3.3  | TSLFTNLESTK          | 46 | 1531 | 1.92 | 0.14 | 7   |
| 1 F11C3.3   | HTDAVAELTDQLDQLNK    | 41 | 1968 | 1.92 | 0.17 | 9   |
| 10 F11C3.3  | NFERLQDLIDK          | 11 | 3970 | 1.96 | 0.40 | 21  |
| 22 F11C3.3  | ARFEGEGLLK           | 32 | 4266 | 1.98 | 0.06 | 3   |
| 22 F11C3.3  | LVDQHLGK             | 22 | 4287 | 2.16 | 0.23 | 11  |
| 22 F11C3.3  | TSLFTNLESTK          | 23 | 1320 | 2.21 | 0.14 | 7   |
| 10 F11C3.3  | NEILRQLSK            | 16 | 422  | 2.23 | 0.36 | 16  |
| 22 F11C3.3  | ARFEGEGLLK           | 19 | 1067 | 2.25 | 0.25 | 11  |
| 22 F11C3.3  | SDLQRELEELGEK        | 20 | 861  | 2.25 | 0.23 | 10  |
| 7 F11C3.3   | ARFEGEGLLK           | 14 | 1241 | 2.27 | 0.35 | 15  |
| 1 F11C3.3   | TQLSDAEERLAK         | 31 | 992  | 2.28 | 0.19 | 8   |
| 10 F11C3.3  | TSLFTNLESTK          | 43 | 1435 | 2.28 | 0.21 | 9   |
| 7 F11C3.3   | TQLSDAEERLAK         | 38 | 1805 | 2.31 | 0.12 | 5   |
| 1 F11C3.3   | TSLFTNLESTK          | 21 | 1077 | 2.35 | 0.32 | 14  |
| 22 F11C3.3  | TQLSDAEERLAK         | 36 | 2204 | 2.38 | 0.30 | 13  |
| 22 F11C3.3  | HTDAVAELTDQLDQLNK    | 48 | 1851 | 2.39 | 0.13 | 5   |
| 22 F11C3.3  | HTDAVAELTDQLDQLNK    | 30 | 1195 | 2.44 | 0.23 | 9   |
| 7 F11C3.3   | RATLLQSEK            | 16 | 429  | 2.44 | 0.29 | 12  |
| 22 F11C3.3  | QIQDLEMSLRK          | 19 | 610  | 2.48 | 0.21 | 8   |
| 10 F11C3.3  | NEILRQLSK            | 21 | 2152 | 2.66 | 0.28 | 10  |
| 22 F11C3.3  | ARFEGEGLLK           | 13 | 1048 | 2.76 | 0.20 | 7   |
| 22 F11C3.3  | HTDAVAELTDQLDQLNK    | 23 | 1451 | 2.92 | 0.14 | 5   |
| 22 F11C3.3  | HTDAVAELTDQLDQLNK    | 27 | 1472 | 3.01 | 0.20 | 7   |
| 1 F11C3.3   | TSLFTNLESTK          | 15 | 872  | 3.05 | 0.12 | 4   |
| 1 F11C3.3   | DHQIRSLQDEMQQQDEAIAK | 18 | 498  | 3.22 | 0.08 | 2   |
| 22 F11C3.3  | TQLSDAEERLAK         | 33 | 2748 | 3.31 | 0.04 | 1   |
| 22 F11C3.3  | ARFEGEGLLK           | 33 | 1048 | 3.35 | 0.16 | 5   |
| 22 F11C3.3  | TSLFTNLESTK          | 21 | 980  | 3.40 | 0.33 | 10  |
| 10 F11C3.3  | NFERLQDLIDK          | 16 | 3953 | 3.66 | 0.24 | 7   |
| 7 F11C3.3   | TQLSDAEERLAK         | 36 | 1761 | 3.66 | 0.09 | 3   |
| 10 F11C3.3  | INELQEALDAANSK       | 40 | 1702 | 3.73 | 0.15 | 4   |
| 10 F11C3.3  | IIDEWRK              | 22 | 4957 | 3.77 | 0.11 | 3   |
| 10 F11C3.3  | RATLLQSEK            | 11 | 6791 | 3.79 | 0.26 | 7   |
| 10 F11C3.3  | ARFEGEGLLK           | 14 | 1796 | 4.15 | 0.40 | 10  |
| 10 F11C3.3  | INELQEALDAANSK       | 44 | 1646 | 6.42 | 0.27 | 4   |
| 22 F11C3.3  | TSLFTNLESTK          | 22 | 946  | 6.51 | 0.35 | 5   |
| 7 F11G11.2  | HYGFFANFLK           | 33 | 2433 | 0.24 | 0.11 | 48  |
| 7 F11G11.2  | HYGFFANFLK           | 33 | 2433 | 0.25 | 0.21 | 81  |
| 10 F11G11.2 | MGFAEGDLDALAK        | 62 | 2832 | 0.27 | 0.19 | 69  |
| 7 F11G11.2  | MGFAEGDLDALAK        | 45 | 1932 | 0.29 | 0.16 | 53  |
| 10 F11G11.2 | DVFLPGFK             | 16 | 5248 | 0.30 | 0.26 | 88  |
| 22 F11G11.2 | MGFAEGDLDALAK        | 30 | 1932 | 0.31 | 0.36 | 118 |
| 7 F11G11.2  | MGFAEGDLDALAK        | 39 | 2292 | 0.32 | 0.16 | 49  |
| 22 F11G11.2 | HYGFFANFLK           | 33 | 1348 | 0.33 | 0.12 | 35  |
| 22 F11G11.2 | DVFLPGFK             | 10 | 1309 | 0.35 | 0.38 | 110 |
| 10 F11G11.2 | DVFLPGFK             | 16 | 4507 | 0.36 | 0.35 | 98  |
| 7 F11G11.2  | DVFLPGFK             | 11 | 3714 | 0.37 | 0.07 | 18  |
| 22 F11G11.2 | MGFAEGDLDALAK        | 85 | 2320 | 0.38 | 0.19 | 51  |
| 10 F11G11.2 | DVFLPGFK             | 22 | 4348 | 0.39 | 0.16 | 40  |
| 10 F11G11.2 | MGFAEGDLDALAK        | 56 | 3283 | 0.39 | 0.13 | 32  |
| 7 F11G11.2  | MGFAEGDLDALAK        | 71 | 2330 | 0.42 | 0.19 | 45  |
| 10 F11G11.2 | MGFAEGDLDALAK        | 59 | 4033 | 0.43 | 0.28 | 64  |
| 10 F11G11.2 | MGFAEGDLDALAK        | 61 | 2592 | 0.45 | 0.36 | 81  |
| 22 F11G11.2 | HYGFFANFLK           | 35 | 1712 | 0.49 | 0.12 | 24  |
| 22 F11G11.2 | MGFAEGDLDALAK        | 52 | 3078 | 0.55 | 0.16 | 30  |
| 22 F11G11.2 | MGFAEGDLDALAK        | 22 | 1001 | 0.55 | 0.53 | 95  |
| 10 F11G11.2 | DVFLPGFK             | 18 | 3322 | 0.62 | 0.11 | 19  |
| 7 F11G11.2  | MGFAEGDLDALAK        | 94 | 2928 | 0.65 | 0.11 | 18  |
| 7 F11G11.2  | MGFAEGDLDALAK        | 47 | 1294 | 0.71 | 0.15 | 21  |
| 22 F11G11.2 | MGFAEGDLDALAK        | 37 | 1750 | 0.72 | 0.13 | 18  |
| 10 F11G11.2 | MGFAEGDLDALAK        | 41 | 2272 | 0.75 | 0.20 | 27  |
| 22 F11G11.2 | DYLNNEVRPYFMVK       | 15 | 3953 | 0.78 | 0.19 | 24  |
| 22 F11G11.2 | HYGFFANFLK           | 26 | 2849 | 0.80 | 0.09 | 11  |
| 22 F11G11.2 | DYLNNEVRPYFMVK       | 37 | 4209 | 0.84 | 0.17 | 21  |
| 1 F11G11.2  | HYGFFANFLK           | 23 | 844  | 0.90 | 0.17 | 18  |
| 10 F11G11.2 | MGFAEGDLDALAK        | 24 | 1593 | 0.94 | 0.18 | 20  |
| 10 F11G11.2 | MGFAEGDLDALAK        | 50 | 3383 | 0.94 | 0.19 | 21  |
| 1 F11G11.2  | HYGFFANFLK           | 16 | 717  | 1.07 | 0.21 | 20  |
| 1 F11G11.2  | MGFAEGDLDALAK        | 28 | 829  | 1.22 | 0.22 | 18  |
| 22 F11G11.2 | DYLNNEVRPYFMVK       | 24 | 4910 | 1.25 | 0.11 | 9   |
| 1 F11G11.2  | MGFAEGDLDALAK        | 62 | 4465 | 1.29 | 0.05 | 4   |
| 1 F11G11.2  | MGFAEGDLDALAK        | 52 | 1232 | 1.33 | 0.14 | 10  |
| 1 F11G11.2  | MGFAEGDLDALAK        | 63 | 4081 | 1.37 | 0.16 | 11  |
| 22 F11G11.2 | MGFAEGDLDALAK        | 42 | 1799 | 1.37 | 0.11 | 8   |
| 22 F11G11.2 | DVFLPGFK             | 13 | 3712 | 1.41 | 0.07 | 5   |
| 1 F11G11.2  | MGFAEGDLDALAK        | 90 | 1400 | 1.59 | 0.11 | 7   |
| 22 F11G11.2 | MGFAEGDLDALAK        | 29 | 2591 | 1.60 | 0.09 | 6   |
| 7 F11G11.2  | HYGFFANFLK           | 36 | 2244 | 1.83 | 0.13 | 7   |

|                                  |                  |     |        |      |      |     |
|----------------------------------|------------------|-----|--------|------|------|-----|
| 10 F11G11.2                      | MGFAEGDLDALAK    | 18  | 1857   | 1.97 | 0.16 | 8   |
| 7 F11G11.2                       | HYGFFANFLK       | 22  | 1140   | 2.08 | 0.15 | 7   |
| 10 F11G11.2                      | HYGFFANFLK       | 32  | 2058   | 2.17 | 0.09 | 4   |
| 10 F11G11.2                      | HYGFFANFLK       | 31  | 1572   | 2.21 | 0.13 | 6   |
| 1 F11G11.2                       | HYGFFANFLK       | 36  | 427    | 2.25 | 0.17 | 8   |
| 1 F11G11.2                       | MGFAEGDLDALAK    | 57  | 2124   | 2.36 | 0.11 | 5   |
| 1 F11G11.2                       | MGFAEGDLDALAK    | 69  | 2209   | 2.51 | 0.08 | 3   |
| 10 F11G11.2                      | DVFLPGFK         | 12  | 2418   | 2.53 | 0.06 | 3   |
| 7 F11G11.2                       | DVFLPGFK         | 20  | 844    | 2.58 | 0.05 | 2   |
| 7 F11G11.2                       | MGFAEGDLDALAK    | 58  | 4100   | 2.77 | 0.11 | 4   |
| 7 F11G11.2                       | MGFAEGDLDALAK    | 49  | 2708   | 3.07 | 0.18 | 6   |
| 10 F11G11.2                      | MGFAEGDLDALAK    | 55  | 2872   | 3.12 | 0.14 | 5   |
| 10 F11G11.2                      | MGFAEGDLDALAK    | 44  | 2429   | 3.15 | 0.12 | 4   |
| 10 F11G11.3                      | DQLRTDVFPAPFK    | 21  | 4074   | 0.58 | 0.13 | 22  |
| 22 F11G11.3                      | DQLRTDVFPAPFK    | 14  | 2860   | 0.93 | 0.07 | 8   |
| 22 F11G11.3                      | DQLRTDVFPAPFK    | 14  | 3686   | 1.08 | 0.28 | 25  |
| 22 F11H8.4a;F11H8.4b             | MSHSELK          | 25  | 2276   | 0.34 | 0.08 | 22  |
| 22 F11H8.4a;F11H8.4b             | MSHSELK          | 11  | 1733   | 0.49 | 0.11 | 23  |
| 22 F11H8.4a;F11H8.4b             | MSHSELK          | 16  | 1527   | 0.52 | 0.09 | 18  |
| 22 F11H8.4a;F11H8.4b             | MSHSELK          | 21  | 811    | 0.54 | 0.08 | 16  |
| 22 F11H8.4a;F11H8.4b             | MSHSELK          | 14  | 758    | 1.09 | 0.13 | 12  |
| 22 F11H8.4a;F11H8.4b             | MSHSELK          | 10  | 626    | 1.73 | 0.19 | 11  |
| 1 F11H8.4a;F11H8.4b;C46C11.3     | MSHSELK          | 19  | 897    | 0.42 | 0.20 | 47  |
| 7 F13B10.2a;F13B10.2c;F13B10.2d  | RDFLAEAEAK       | 34  | 1783   | 0.19 | 0.08 | 41  |
| 7 F13B10.2a;F13B10.2c;F13B10.2d  | NNGSTEFDLTQK     | 61  | 2029   | 0.34 | 0.14 | 42  |
| 7 F13B10.2a;F13B10.2c;F13B10.2d  | RDFLAEAEAK       | 33  | 2217   | 0.36 | 0.23 | 63  |
| 7 F13B10.2a;F13B10.2c;F13B10.2d  | NNGSTEFDLTQK     | 65  | 2421   | 0.39 | 0.11 | 27  |
| 7 F13B10.2a;F13B10.2c;F13B10.2d  | NNGSTEFDLTQK     | 90  | 2458   | 0.51 | 0.17 | 34  |
| 7 F13B10.2a;F13B10.2c;F13B10.2d  | VDWAREHLEK       | 17  | 3343   | 0.64 | 0.31 | 48  |
| 7 F13B10.2a;F13B10.2c;F13B10.2d  | NNGSTEFDLTQK     | 76  | 3837   | 0.65 | 0.13 | 19  |
| 7 F13B10.2a;F13B10.2c;F13B10.2d  | NNGSTEFDLTQK     | 90  | 3595   | 0.69 | 0.10 | 15  |
| 7 F13B10.2a;F13B10.2c;F13B10.2d  | NNGSTEFDLTQK     | 63  | 2348   | 0.70 | 0.17 | 25  |
| 7 F13B10.2a;F13B10.2c;F13B10.2d  | GFHHRTIINNKK     | 11  | 3748   | 0.84 | 0.09 | 10  |
| 7 F13B10.2a;F13B10.2c;F13B10.2d  | GFHHRTIINNKK     | 10  | 2244   | 0.88 | 0.15 | 17  |
| 7 F13B10.2a;F13B10.2c;F13B10.2d  | RAFMGK           | 10  | 1492   | 1.17 | 0.33 | 28  |
| 7 F13B10.2a;F13B10.2c;F13B10.2d  | RAFMGK           | 14  | 3032   | 1.98 | 0.16 | 8   |
| 7 F13B10.2a;F13B10.2c;F13B10.2d  | RAFMGK           | 14  | 2576   | 2.03 | 0.14 | 7   |
| 22 F13B10.2a;F13B10.2d;F13B10.2c | VDWAREHLEK       | 24  | 174861 | 0.23 | 0.16 | 70  |
| 22 F13B10.2a;F13B10.2d;F13B10.2c | RDFLAEAEAK       | 15  | 672    | 0.25 | 0.09 | 34  |
| 22 F13B10.2a;F13B10.2d;F13B10.2c | SKPIHLTAFLGYK    | 29  | 2709   | 0.26 | 0.20 | 78  |
| 10 F13B10.2a;F13B10.2d;F13B10.2c | RDFLAEAEAK       | 20  | 2729   | 0.31 | 0.16 | 53  |
| 10 F13B10.2a;F13B10.2d;F13B10.2c | SKPIHLTAFLGYK    | 27  | 6831   | 0.31 | 0.33 | 104 |
| 10 F13B10.2a;F13B10.2d;F13B10.2c | RDFLAEAEAK       | 32  | 2870   | 0.37 | 0.16 | 42  |
| 10 F13B10.2a;F13B10.2d;F13B10.2c | SKPIHLTAFLGYK    | 26  | 8119   | 0.41 | 0.26 | 63  |
| 22 F13B10.2a;F13B10.2d;F13B10.2c | RDFLAEAEAK       | 31  | 12294  | 0.43 | 0.07 | 17  |
| 22 F13B10.2a;F13B10.2d;F13B10.2c | RDFLAEAEAK       | 23  | 14664  | 0.45 | 0.14 | 30  |
| 22 F13B10.2a;F13B10.2d;F13B10.2c | VDWAREHLEK       | 29  | 131770 | 0.46 | 0.16 | 35  |
| 22 F13B10.2a;F13B10.2d;F13B10.2c | WIDTSSK          | 22  | 8842   | 0.52 | 0.09 | 17  |
| 22 F13B10.2a;F13B10.2d;F13B10.2c | NNGSTEFDLTQK     | 38  | 1403   | 0.53 | 0.18 | 34  |
| 22 F13B10.2a;F13B10.2d;F13B10.2c | NNGSTEFDLTQK     | 29  | 1215   | 0.57 | 0.22 | 39  |
| 22 F13B10.2a;F13B10.2d;F13B10.2c | SKPIHLTAFLGYK    | 29  | 25191  | 0.58 | 0.18 | 31  |
| 10 F13B10.2a;F13B10.2d;F13B10.2c | NNGSTEFDLTQK     | 36  | 1766   | 0.58 | 0.11 | 18  |
| 22 F13B10.2a;F13B10.2d;F13B10.2c | NNGSTEFDLTQK     | 111 | 35300  | 0.63 | 0.08 | 13  |
| 22 F13B10.2a;F13B10.2d;F13B10.2c | VDWAREHLEK       | 11  | 9314   | 0.65 | 0.14 | 21  |
| 22 F13B10.2a;F13B10.2d;F13B10.2c | NNGSTEFDLTQK     | 90  | 36762  | 0.68 | 0.10 | 14  |
| 22 F13B10.2a;F13B10.2d;F13B10.2c | AHLVEIQVNGGTIEQK | 114 | 10803  | 0.70 | 0.07 | 10  |
| 22 F13B10.2a;F13B10.2d;F13B10.2c | IYRIGK           | 15  | 3553   | 0.72 | 0.05 | 7   |
| 10 F13B10.2a;F13B10.2d;F13B10.2c | NNGSTEFDLTQK     | 50  | 3993   | 0.73 | 0.20 | 27  |
| 22 F13B10.2a;F13B10.2d;F13B10.2c | VDWAREHLEK       | 11  | 3425   | 0.79 | 0.19 | 24  |
| 22 F13B10.2a;F13B10.2d;F13B10.2c | AHLVEIQVNGGTIEQK | 119 | 11494  | 0.80 | 0.10 | 12  |
| 10 F13B10.2a;F13B10.2d;F13B10.2c | RDFLAEAEAK       | 48  | 6385   | 0.84 | 0.21 | 25  |
| 10 F13B10.2a;F13B10.2d;F13B10.2c | SKPIHLTAFLGYK    | 24  | 7861   | 0.85 | 0.11 | 13  |
| 22 F13B10.2a;F13B10.2d;F13B10.2c | RDFLAEAEAK       | 62  | 6908   | 0.86 | 0.09 | 10  |
| 22 F13B10.2a;F13B10.2d;F13B10.2c | RDFLAEAEAK       | 30  | 391    | 0.86 | 0.17 | 19  |
| 22 F13B10.2a;F13B10.2d;F13B10.2c | RDFLAEAEAK       | 35  | 2560   | 0.95 | 0.16 | 17  |
| 10 F13B10.2a;F13B10.2d;F13B10.2c | SKPIHLTAFLGYK    | 18  | 6205   | 0.96 | 0.11 | 12  |
| 22 F13B10.2a;F13B10.2d;F13B10.2c | LIEADFAK         | 17  | 1518   | 0.98 | 0.19 | 20  |
| 22 F13B10.2a;F13B10.2d;F13B10.2c | AGMTHIVRDVDKPGSK | 14  | 9017   | 0.99 | 0.39 | 40  |
| 22 F13B10.2a;F13B10.2d;F13B10.2c | VDWAREHLEK       | 21  | 10110  | 1.01 | 0.11 | 11  |
| 22 F13B10.2a;F13B10.2d;F13B10.2c | RLITLRK          | 11  | 51361  | 1.04 | 0.11 | 10  |
| 22 F13B10.2a;F13B10.2d;F13B10.2c | RAFMGK           | 16  | 8492   | 1.07 | 0.18 | 17  |
| 10 F13B10.2a;F13B10.2d;F13B10.2c | RDFLAEAEAK       | 13  | 1156   | 1.07 | 0.14 | 13  |
| 22 F13B10.2a;F13B10.2d;F13B10.2c | NNGSTEFDLTQK     | 63  | 5899   | 1.09 | 0.10 | 9   |
| 22 F13B10.2a;F13B10.2d;F13B10.2c | FSAPRHGHMGFTPK   | 18  | 19164  | 1.12 | 0.17 | 15  |
| 10 F13B10.2a;F13B10.2d;F13B10.2c | NNGSTEFDLTQK     | 67  | 3885   | 1.12 | 0.06 | 6   |
| 22 F13B10.2a;F13B10.2d;F13B10.2c | NNGSTEFDLTQK     | 33  | 2906   | 1.17 | 0.14 | 12  |
| 10 F13B10.2a;F13B10.2d;F13B10.2c | RDFLAEAEAK       | 13  | 7975   | 1.21 | 0.07 | 6   |
| 22 F13B10.2a;F13B10.2d;F13B10.2c | SLITQTK          | 37  | 10441  | 1.22 | 0.18 | 15  |
| 22 F13B10.2a;F13B10.2d;F13B10.2c | RDFLAEAEAK       | 40  | 18522  | 1.27 | 0.09 | 7   |
| 22 F13B10.2a;F13B10.2d;F13B10.2c | RAFMGK           | 16  | 6270   | 1.33 | 0.20 | 15  |
| 22 F13B10.2a;F13B10.2d;F13B10.2c | FSAPRHGHMGFTPK   | 20  | 14260  | 1.38 | 0.17 | 12  |
| 10 F13B10.2a;F13B10.2d;F13B10.2c | GFHHRTIINNKK     | 15  | 14948  | 1.41 | 0.33 | 23  |
| 22 F13B10.2a;F13B10.2d;F13B10.2c | GVTSRWHTK        | 24  | 2439   | 1.51 | 0.13 | 8   |
| 10 F13B10.2a;F13B10.2d;F13B10.2c | RDFLAEAEAK       | 15  | 8936   | 1.51 | 0.09 | 6   |
| 22 F13B10.2a;F13B10.2d;F13B10.2c | AHLVEIQVNGGTIEQK | 23  | 10189  | 1.66 | 0.10 | 6   |
| 22 F13B10.2a;F13B10.2d;F13B10.2c | RDFLAEAEAK       | 16  | 11961  | 1.69 | 0.23 | 13  |
| 22 F13B10.2a;F13B10.2d;F13B10.2c | GFHHRTIINNKK     | 21  | 1813   | 1.78 | 0.07 | 4   |
| 22 F13B10.2a;F13B10.2d;F13B10.2c | FSAPRHGHMGFTPK   | 32  | 22008  | 1.93 | 0.14 | 7   |
| 22 F13B10.2a;F13B10.2d;F13B10.2c | GFHHRTIINNKK     | 17  | 2199   | 1.93 | 0.08 | 4   |
| 22 F13B10.2a;F13B10.2d;F13B10.2c | IYRIGK           | 15  | 22071  | 1.99 | 0.12 | 6   |
| 22 F13B10.2a;F13B10.2d;F13B10.2c | FSAPRHGHMGFTPK   | 26  | 21813  | 2.04 | 0.11 | 5   |
| 10 F13B10.2a;F13B10.2d;F13B10.2c | GFHHRTIINNKK     | 17  | 14016  | 2.30 | 0.71 | 31  |
| 22 F13B10.2a;F13B10.2d;F13B10.2c | GFHHRTIINNKK     | 11  | 1748   | 2.32 | 0.07 | 3   |
| 10 F13B10.2a;F13B10.2d;F13B10.2c | GFHHRTIINNKK     | 13  | 20273  | 2.44 | 0.19 | 8   |
| 10 F13B10.2a;F13B10.2d;F13B10.2c | RLITLRK          | 12  | 43418  | 2.72 | 0.16 | 6   |
| 22 F13B10.2a;F13B10.2d;F13B10.2c | GFHHRTIINNKK     | 11  | 23878  | 2.86 | 0.11 | 4   |
| 10 F13B10.2a;F13B10.2d;F13B10.2c | RAFMGK           | 17  | 4443   | 3.84 | 0.07 | 2   |
| 10 F13B10.2a;F13B10.2d;F13B10.2c | IYRIGK           | 14  | 7779   | 3.89 | 0.10 | 3   |
| 10 F13B10.2a;F13B10.2d;F13B10.2c | FSAPRHGHMGFTPK   | 20  | 11100  | 4.32 | 0.18 | 4   |
| 10 F13B10.2a;F13B10.2d;F13B10.2c | FSAPRHGHMGFTPK   | 13  | 8283   | 4.75 | 0.16 | 3   |
| 10 F13B10.2a;F13B10.2d;F13B10.2c | IYRIGK           | 14  | 7440   | 4.96 | 0.05 | 1   |

|                                  |                   |     |       |      |      |     |
|----------------------------------|-------------------|-----|-------|------|------|-----|
| 10 F13B10.2a;F13B10.2d;F13B10.2c | GFHHRTIINNKK      | 14  | 867   | 5.03 | 0.15 | 3   |
| 10 F13B10.2a;F13B10.2d;F13B10.2c | FSAPRHGHMGFTPK    | 27  | 9210  | 5.65 | 0.16 | 3   |
| 10 F13B10.2a;F13B10.2d;F13B10.2c | AHLVEIQVNGGTIEQK  | 103 | 5790  | 6.63 | 0.08 | 1   |
| 10 F13B10.2a;F13B10.2d;F13B10.2c | RAFMGK            | 14  | 3388  | 7.98 | 0.11 | 1   |
| 10 F13B10.2a;F13B10.2d;F13B10.2c | AHLVEIQVNGGTIEQK  | 105 | 6756  | 8.71 | 0.12 | 1   |
| 10 F13B10.2a;F13B10.2d;F13B10.2c | FSAPRHGHMGFTPK    | 23  | 11298 | 8.72 | 0.22 | 2   |
| 10 F13D12.2                      | QQLTEAEVQK        | 51  | 4100  | 0.27 | 0.26 | 95  |
| 22 F13D12.2                      | VVDSAYEIIK        | 34  | 834   | 0.69 | 0.10 | 14  |
| 10 F13D12.2                      | EVFAEIAAPVENSCHK  | 46  | 6959  | 0.73 | 0.10 | 14  |
| 22 F13D12.2                      | EVFAEIAAPVENSCHK  | 59  | 6072  | 0.76 | 0.15 | 20  |
| 22 F13D12.2                      | QQLTEAEVQK        | 65  | 5071  | 0.77 | 0.15 | 19  |
| 10 F13D12.2                      | EVFAEIAAPVENSCHK  | 48  | 6663  | 0.83 | 0.12 | 15  |
| 1 F13D12.2                       | QQLTEAEVQK        | 21  | 648   | 0.84 | 0.13 | 15  |
| 10 F13D12.2                      | VVDSAYEIIK        | 41  | 2028  | 0.85 | 0.10 | 12  |
| 22 F13D12.2                      | EVFAEIAAPVENSCHK  | 33  | 6835  | 0.88 | 0.10 | 12  |
| 10 F13D12.2                      | EVFAEIAAPVENSCHK  | 17  | 5214  | 0.95 | 0.13 | 14  |
| 10 F13D12.2                      | VVDSAYEIIK        | 19  | 1297  | 0.96 | 0.12 | 13  |
| 22 F13D12.2                      | EVFAEIAAPVENSCHK  | 13  | 2588  | 0.97 | 0.08 | 8   |
| 22 F13D12.2                      | EVFAEIAAPVENSCHK  | 53  | 7619  | 0.98 | 0.10 | 10  |
| 10 F13D12.2                      | EVFAEIAAPVENSCHK  | 21  | 5607  | 1.01 | 0.14 | 14  |
| 22 F13D12.2                      | EVFAEIAAPVENSCHK  | 38  | 7773  | 1.01 | 0.08 | 8   |
| 22 F13D12.2                      | EVFAEIAAPVENSCHK  | 16  | 4519  | 1.04 | 0.18 | 17  |
| 22 F13D12.2                      | QQLTEAEVQK        | 71  | 6358  | 1.09 | 0.12 | 11  |
| 10 F13D12.2                      | VVDSAYEIIK        | 57  | 2569  | 1.10 | 0.10 | 9   |
| 22 F13D12.2                      | VVDSAYEIIK        | 12  | 613   | 1.16 | 0.17 | 15  |
| 10 F13D12.2                      | VVDSAYEIIK        | 47  | 1747  | 1.34 | 0.12 | 9   |
| 22 F13D12.2                      | VVDSAYEIIK        | 12  | 749   | 1.45 | 0.12 | 8   |
| 7 F13D12.2                       | VVDSAYEIIK        | 28  | 842   | 2.13 | 0.07 | 3   |
| 1 F13D12.4a;F13D12.4b            | NHGVIMADANK       | 34  | 1040  | 0.12 | 0.22 | 184 |
| 1 F13D12.4a;F13D12.4b            | NHGVIMADANK       | 40  | 541   | 0.25 | 0.30 | 120 |
| 10 F13D12.4a;F13D12.4b           | VNAGWKPDIDIGPLISK | 53  | 6224  | 0.28 | 0.24 | 87  |
| 1 F13D12.4a;F13D12.4b            | AISFVGDDAAGK      | 25  | 1852  | 0.30 | 0.35 | 116 |
| 22 F13D12.4a;F13D12.4b           | ARVLRILIESAK      | 15  | 3313  | 0.31 | 0.08 | 26  |
| 10 F13D12.4a;F13D12.4b           | LQALIK            | 21  | 632   | 0.39 | 0.16 | 41  |
| 10 F13D12.4a;F13D12.4b           | AISFVGDDAAGK      | 75  | 7896  | 0.39 | 0.21 | 53  |
| 10 F13D12.4a;F13D12.4b           | VNAGWKPDIDIGPLISK | 44  | 5939  | 0.40 | 0.27 | 68  |
| 1 F13D12.4a;F13D12.4b            | AISFVGDDAAGK      | 11  | 1506  | 0.40 | 0.20 | 49  |
| 10 F13D12.4a;F13D12.4b           | AISFVGDDAAGK      | 74  | 8767  | 0.42 | 0.25 | 59  |
| 1 F13D12.4a;F13D12.4b            | AISFVGDDAAGK      | 35  | 1376  | 0.43 | 0.19 | 44  |
| 1 F13D12.4a;F13D12.4b            | AISFVGDDAAGK      | 45  | 2214  | 0.43 | 0.20 | 46  |
| 10 F13D12.4a;F13D12.4b           | AISFVGDDAAGK      | 104 | 17332 | 0.45 | 0.21 | 46  |
| 1 F13D12.4a;F13D12.4b            | AISFVGDDAAGK      | 30  | 1675  | 0.47 | 0.13 | 28  |
| 10 F13D12.4a;F13D12.4b           | AISFVGDDAAGK      | 101 | 18700 | 0.47 | 0.18 | 39  |
| 7 F13D12.4a;F13D12.4b            | AISFVGDDAAGK      | 85  | 11208 | 0.51 | 0.27 | 53  |
| 22 F13D12.4a;F13D12.4b           | AISFVGDDAAGK      | 67  | 4388  | 0.52 | 0.19 | 36  |
| 22 F13D12.4a;F13D12.4b           | AISFVGDDAAGK      | 63  | 6365  | 0.53 | 0.23 | 44  |
| 22 F13D12.4a;F13D12.4b           | AISFVGDDAAGK      | 74  | 9705  | 0.53 | 0.20 | 37  |
| 22 F13D12.4a;F13D12.4b           | AISFVGDDAAGK      | 86  | 8619  | 0.55 | 0.21 | 39  |
| 7 F13D12.4a;F13D12.4b            | AISFVGDDAAGK      | 94  | 11373 | 0.56 | 0.23 | 42  |
| 22 F13D12.4a;F13D12.4b           | AISFVGDDAAGK      | 71  | 4340  | 0.57 | 0.27 | 47  |
| 1 F13D12.4a;F13D12.4b            | AISFVGDDAAGK      | 47  | 3350  | 0.58 | 0.22 | 39  |
| 22 F13D12.4a;F13D12.4b           | AISFVGDDAAGK      | 78  | 11632 | 0.58 | 0.22 | 38  |
| 22 F13D12.4a;F13D12.4b           | AISFVGDDAAGK      | 41  | 5067  | 0.60 | 0.30 | 50  |
| 22 F13D12.4a;F13D12.4b           | AISFVGDDAAGK      | 32  | 3502  | 0.62 | 0.57 | 93  |
| 22 F13D12.4a;F13D12.4b           | AISFVGDDAAGK      | 70  | 5298  | 0.62 | 0.32 | 51  |
| 22 F13D12.4a;F13D12.4b           | AISFVGDDAAGK      | 37  | 4741  | 0.62 | 0.11 | 18  |
| 7 F13D12.4a;F13D12.4b            | AISFVGDDAAGK      | 68  | 3696  | 0.63 | 0.22 | 36  |
| 1 F13D12.4a;F13D12.4b            | AISFVGDDAAGK      | 66  | 3845  | 0.63 | 0.23 | 36  |
| 10 F13D12.4a;F13D12.4b           | AISFVGDDAAGK      | 61  | 7240  | 0.63 | 0.21 | 34  |
| 7 F13D12.4a;F13D12.4b            | AISFVGDDAAGK      | 63  | 8851  | 0.64 | 0.25 | 39  |
| 22 F13D12.4a;F13D12.4b           | AISFVGDDAAGK      | 39  | 5969  | 0.64 | 0.19 | 29  |
| 7 F13D12.4a;F13D12.4b            | AISFVGDDAAGK      | 84  | 6305  | 0.65 | 0.29 | 44  |
| 7 F13D12.4a;F13D12.4b            | AISFVGDDAAGK      | 20  | 3524  | 0.66 | 0.10 | 15  |
| 1 F13D12.4a;F13D12.4b            | LAESITIEQK        | 31  | 1017  | 0.66 | 0.27 | 40  |
| 7 F13D12.4a;F13D12.4b            | AISFVGDDAAGK      | 55  | 3855  | 0.67 | 0.22 | 33  |
| 10 F13D12.4a;F13D12.4b           | AISFVGDDAAGK      | 71  | 4082  | 0.68 | 0.30 | 45  |
| 7 F13D12.4a;F13D12.4b            | AISFVGDDAAGK      | 87  | 13293 | 0.68 | 0.19 | 28  |
| 7 F13D12.4a;F13D12.4b            | AISFVGDDAAGK      | 67  | 10333 | 0.68 | 0.16 | 24  |
| 10 F13D12.4a;F13D12.4b           | AISFVGDDAAGK      | 72  | 9210  | 0.69 | 0.19 | 27  |
| 7 F13D12.4a;F13D12.4b            | NHGVIMADANK       | 26  | 1168  | 0.69 | 0.11 | 15  |
| 7 F13D12.4a;F13D12.4b            | AISFVGDDAAGK      | 48  | 5337  | 0.71 | 0.29 | 41  |
| 7 F13D12.4a;F13D12.4b            | LWIDGQAVESK       | 34  | 1262  | 0.71 | 0.25 | 35  |
| 1 F13D12.4a;F13D12.4b            | AISFVGDDAAGK      | 65  | 6296  | 0.72 | 0.21 | 29  |
| 1 F13D12.4a;F13D12.4b            | AISFVGDDAAGK      | 73  | 3916  | 0.73 | 0.17 | 23  |
| 22 F13D12.4a;F13D12.4b           | AISFVGDDAAGK      | 54  | 2636  | 0.74 | 0.26 | 35  |
| 10 F13D12.4a;F13D12.4b           | AISFVGDDAAGK      | 55  | 6039  | 0.76 | 0.21 | 27  |
| 7 F13D12.4a;F13D12.4b            | NHGVIMADANK       | 39  | 1369  | 0.76 | 0.20 | 27  |
| 10 F13D12.4a;F13D12.4b           | AISFVGDDAAGK      | 59  | 8792  | 0.77 | 0.12 | 16  |
| 7 F13D12.4a;F13D12.4b            | LWIDGQAVESK       | 20  | 1343  | 0.77 | 0.09 | 12  |
| 7 F13D12.4a;F13D12.4b            | AISFVGDDAAGK      | 42  | 4332  | 0.78 | 0.11 | 15  |
| 10 F13D12.4a;F13D12.4b           | AISFVGDDAAGK      | 55  | 5629  | 0.78 | 0.18 | 23  |
| 1 F13D12.4a;F13D12.4b            | LAESITIEQK        | 24  | 1127  | 0.78 | 0.11 | 14  |
| 7 F13D12.4a;F13D12.4b            | NHGVIMADANK       | 38  | 1702  | 0.79 | 0.10 | 13  |
| 22 F13D12.4a;F13D12.4b           | AISFVGDDAAGK      | 57  | 8372  | 0.79 | 0.25 | 31  |
| 22 F13D12.4a;F13D12.4b           | AISFVGDDAAGK      | 48  | 4217  | 0.81 | 0.35 | 44  |
| 7 F13D12.4a;F13D12.4b            | NHGVIMADANK       | 16  | 476   | 0.81 | 0.12 | 15  |
| 10 F13D12.4a;F13D12.4b           | AISFVGDDAAGK      | 35  | 13592 | 0.81 | 0.25 | 31  |
| 10 F13D12.4a;F13D12.4b           | AISFVGDDAAGK      | 50  | 4159  | 0.82 | 0.29 | 35  |
| 7 F13D12.4a;F13D12.4b            | AISFVGDDAAGK      | 62  | 13169 | 0.83 | 0.25 | 30  |
| 22 F13D12.4a;F13D12.4b           | AISFVGDDAAGK      | 57  | 10351 | 0.83 | 0.20 | 24  |
| 22 F13D12.4a;F13D12.4b           | LQALIK            | 20  | 926   | 0.84 | 0.19 | 22  |
| 10 F13D12.4a;F13D12.4b           | AISFVGDDAAGK      | 55  | 4045  | 0.84 | 0.29 | 35  |
| 7 F13D12.4a;F13D12.4b            | AISFVGDDAAGK      | 70  | 7602  | 0.86 | 0.22 | 25  |
| 10 F13D12.4a;F13D12.4b           | AISFVGDDAAGK      | 37  | 5693  | 0.86 | 0.31 | 36  |
| 1 F13D12.4a;F13D12.4b            | LAESITIEQK        | 44  | 1337  | 0.89 | 0.13 | 15  |
| 1 F13D12.4a;F13D12.4b            | AISFVGDDAAGK      | 34  | 1235  | 0.90 | 0.27 | 30  |
| 7 F13D12.4a;F13D12.4b            | AISFVGDDAAGK      | 90  | 10771 | 0.91 | 0.18 | 20  |
| 22 F13D12.4a;F13D12.4b           | LQALIK            | 21  | 805   | 0.92 | 0.16 | 18  |
| 10 F13D12.4a;F13D12.4b           | AISFVGDDAAGK      | 87  | 11660 | 0.93 | 0.18 | 19  |
| 7 F13D12.4a;F13D12.4b            | LWIDGQAVESK       | 33  | 1407  | 0.95 | 0.19 | 20  |
| 10 F13D12.4a;F13D12.4b           | LWIDGQAVESK       | 38  | 1583  | 0.97 | 0.11 | 11  |

|                        |              |     |       |      |      |    |
|------------------------|--------------|-----|-------|------|------|----|
| 22 F13D12.4a;F13D12.4b | AISFVGGDAAGK | 30  | 1935  | 0.98 | 0.29 | 29 |
| 22 F13D12.4a;F13D12.4b | AISFVGGDAAGK | 77  | 7649  | 0.98 | 0.22 | 22 |
| 10 F13D12.4a;F13D12.4b | AISFVGGDAAGK | 68  | 8166  | 0.98 | 0.19 | 20 |
| 1 F13D12.4a;F13D12.4b  | AISFVGGDAAGK | 63  | 3684  | 0.99 | 0.28 | 28 |
| 10 F13D12.4a;F13D12.4b | AISFVGGDAAGK | 73  | 6125  | 1.01 | 0.23 | 23 |
| 7 F13D12.4a;F13D12.4b  | AISFVGGDAAGK | 43  | 9131  | 1.01 | 0.28 | 28 |
| 7 F13D12.4a;F13D12.4b  | NHGVIMADANK  | 47  | 1911  | 1.01 | 0.13 | 13 |
| 22 F13D12.4a;F13D12.4b | AISFVGGDAAGK | 29  | 4417  | 1.03 | 0.27 | 26 |
| 7 F13D12.4a;F13D12.4b  | NHGVIMADANK  | 61  | 3739  | 1.03 | 0.12 | 11 |
| 10 F13D12.4a;F13D12.4b | AISFVGGDAAGK | 50  | 7025  | 1.03 | 0.24 | 23 |
| 22 F13D12.4a;F13D12.4b | AISFVGGDAAGK | 79  | 7580  | 1.05 | 0.18 | 17 |
| 7 F13D12.4a;F13D12.4b  | NHGVIMADANK  | 46  | 3148  | 1.07 | 0.10 | 10 |
| 10 F13D12.4a;F13D12.4b | AISFVGGDAAGK | 61  | 8929  | 1.07 | 0.19 | 18 |
| 1 F13D12.4a;F13D12.4b  | AISFVGGDAAGK | 58  | 3236  | 1.09 | 0.19 | 17 |
| 10 F13D12.4a;F13D12.4b | AISFVGGDAAGK | 81  | 5722  | 1.09 | 0.18 | 16 |
| 7 F13D12.4a;F13D12.4b  | NHGVIMADANK  | 43  | 2053  | 1.10 | 0.10 | 9  |
| 10 F13D12.4a;F13D12.4b | AISFVGGDAAGK | 52  | 11538 | 1.10 | 0.07 | 6  |
| 1 F13D12.4a;F13D12.4b  | LWIDGQAVESK  | 28  | 657   | 1.12 | 0.13 | 12 |
| 7 F13D12.4a;F13D12.4b  | AISFVGGDAAGK | 87  | 10240 | 1.15 | 0.23 | 20 |
| 7 F13D12.4a;F13D12.4b  | LWIDGQAVESK  | 43  | 950   | 1.16 | 0.14 | 12 |
| 22 F13D12.4a;F13D12.4b | AISFVGGDAAGK | 48  | 6979  | 1.16 | 0.18 | 15 |
| 22 F13D12.4a;F13D12.4b | AISFVGGDAAGK | 39  | 9429  | 1.16 | 0.27 | 23 |
| 1 F13D12.4a;F13D12.4b  | AISFVGGDAAGK | 47  | 3942  | 1.18 | 0.24 | 20 |
| 1 F13D12.4a;F13D12.4b  | AISFVGGDAAGK | 65  | 5490  | 1.20 | 0.16 | 13 |
| 10 F13D12.4a;F13D12.4b | AISFVGGDAAGK | 40  | 3706  | 1.20 | 0.13 | 10 |
| 7 F13D12.4a;F13D12.4b  | AISFVGGDAAGK | 76  | 13462 | 1.21 | 0.22 | 18 |
| 1 F13D12.4a;F13D12.4b  | AISFVGGDAAGK | 53  | 3779  | 1.22 | 0.21 | 17 |
| 10 F13D12.4a;F13D12.4b | AISFVGGDAAGK | 64  | 5554  | 1.23 | 0.22 | 18 |
| 22 F13D12.4a;F13D12.4b | NHGVIMADANK  | 71  | 7162  | 1.23 | 0.07 | 6  |
| 7 F13D12.4a;F13D12.4b  | AISFVGGDAAGK | 106 | 9530  | 1.25 | 0.21 | 17 |
| 10 F13D12.4a;F13D12.4b | AISFVGGDAAGK | 64  | 6814  | 1.27 | 0.20 | 16 |
| 10 F13D12.4a;F13D12.4b | AISFVGGDAAGK | 69  | 5578  | 1.30 | 0.28 | 22 |
| 22 F13D12.4a;F13D12.4b | AISFVGGDAAGK | 69  | 6028  | 1.33 | 0.10 | 8  |
| 10 F13D12.4a;F13D12.4b | NHGVIMADANK  | 85  | 10907 | 1.34 | 0.04 | 3  |
| 7 F13D12.4a;F13D12.4b  | NHGVIMADANK  | 18  | 867   | 1.34 | 0.06 | 4  |
| 10 F13D12.4a;F13D12.4b | NHGVIMADANK  | 47  | 3233  | 1.34 | 0.11 | 8  |
| 1 F13D12.4a;F13D12.4b  | LWIDGQAVESK  | 30  | 441   | 1.36 | 0.23 | 17 |
| 22 F13D12.4a;F13D12.4b | AISFVGGDAAGK | 67  | 4979  | 1.37 | 0.19 | 14 |
| 1 F13D12.4a;F13D12.4b  | AISFVGGDAAGK | 18  | 1248  | 1.45 | 0.19 | 13 |
| 7 F13D12.4a;F13D12.4b  | NHGVIMADANK  | 39  | 1546  | 1.45 | 0.11 | 8  |
| 7 F13D12.4a;F13D12.4b  | NHGVIMADANK  | 26  | 922   | 1.46 | 0.12 | 8  |
| 1 F13D12.4a;F13D12.4b  | AISFVGGDAAGK | 82  | 4214  | 1.48 | 0.19 | 13 |
| 10 F13D12.4a;F13D12.4b | NHGVIMADANK  | 70  | 8670  | 1.48 | 0.05 | 4  |
| 10 F13D12.4a;F13D12.4b | AISFVGGDAAGK | 37  | 3379  | 1.48 | 0.27 | 18 |
| 22 F13D12.4a;F13D12.4b | AISFVGGDAAGK | 70  | 7065  | 1.51 | 0.18 | 12 |
| 1 F13D12.4a;F13D12.4b  | AISFVGGDAAGK | 81  | 3467  | 1.51 | 0.16 | 11 |
| 22 F13D12.4a;F13D12.4b | NHGVIMADANK  | 73  | 10069 | 1.52 | 0.10 | 7  |
| 10 F13D12.4a;F13D12.4b | AISFVGGDAAGK | 57  | 4557  | 1.52 | 0.22 | 15 |
| 7 F13D12.4a;F13D12.4b  | AISFVGGDAAGK | 82  | 8498  | 1.54 | 0.18 | 12 |
| 7 F13D12.4a;F13D12.4b  | NHGVIMADANK  | 68  | 4245  | 1.54 | 0.05 | 3  |
| 1 F13D12.4a;F13D12.4b  | AISFVGGDAAGK | 48  | 2727  | 1.54 | 0.20 | 13 |
| 10 F13D12.4a;F13D12.4b | LQALIK       | 35  | 1267  | 1.55 | 0.10 | 6  |
| 22 F13D12.4a;F13D12.4b | NHGVIMADANK  | 40  | 1870  | 1.55 | 0.15 | 10 |
| 10 F13D12.4a;F13D12.4b | NHGVIMADANK  | 60  | 2576  | 1.56 | 0.10 | 6  |
| 22 F13D12.4a;F13D12.4b | NHGVIMADANK  | 87  | 10122 | 1.56 | 0.08 | 5  |
| 7 F13D12.4a;F13D12.4b  | AISFVGGDAAGK | 83  | 7911  | 1.57 | 0.16 | 10 |
| 10 F13D12.4a;F13D12.4b | NHGVIMADANK  | 81  | 14786 | 1.58 | 0.11 | 7  |
| 10 F13D12.4a;F13D12.4b | NHGVIMADANK  | 52  | 4503  | 1.60 | 0.08 | 5  |
| 22 F13D12.4a;F13D12.4b | LQALIK       | 24  | 1244  | 1.62 | 0.06 | 4  |
| 7 F13D12.4a;F13D12.4b  | NHGVIMADANK  | 60  | 4065  | 1.64 | 0.09 | 6  |
| 22 F13D12.4a;F13D12.4b | NHGVIMADANK  | 39  | 2331  | 1.66 | 0.19 | 11 |
| 22 F13D12.4a;F13D12.4b | LQALIK       | 23  | 931   | 1.67 | 0.15 | 9  |
| 22 F13D12.4a;F13D12.4b | NHGVIMADANK  | 41  | 2884  | 1.68 | 0.11 | 7  |
| 10 F13D12.4a;F13D12.4b | NHGVIMADANK  | 40  | 4596  | 1.69 | 0.09 | 5  |
| 7 F13D12.4a;F13D12.4b  | NHGVIMADANK  | 54  | 3057  | 1.73 | 0.05 | 3  |
| 7 F13D12.4a;F13D12.4b  | NHGVIMADANK  | 40  | 1671  | 1.74 | 0.08 | 4  |
| 1 F13D12.4a;F13D12.4b  | NHGVIMADANK  | 32  | 1607  | 1.76 | 0.12 | 7  |
| 10 F13D12.4a;F13D12.4b | LQALIK       | 19  | 1274  | 1.77 | 0.12 | 7  |
| 1 F13D12.4a;F13D12.4b  | NHGVIMADANK  | 17  | 487   | 1.79 | 0.24 | 13 |
| 10 F13D12.4a;F13D12.4b | NHGVIMADANK  | 64  | 9140  | 1.79 | 0.05 | 3  |
| 10 F13D12.4a;F13D12.4b | NHGVIMADANK  | 45  | 3498  | 1.80 | 0.05 | 3  |
| 10 F13D12.4a;F13D12.4b | LQALIK       | 28  | 1086  | 1.81 | 0.26 | 14 |
| 22 F13D12.4a;F13D12.4b | NHGVIMADANK  | 44  | 2618  | 1.86 | 0.08 | 4  |
| 10 F13D12.4a;F13D12.4b | AISFVGGDAAGK | 55  | 7159  | 1.90 | 0.27 | 14 |
| 10 F13D12.4a;F13D12.4b | AISFVGGDAAGK | 59  | 6402  | 1.93 | 0.11 | 5  |
| 10 F13D12.4a;F13D12.4b | LQALIK       | 21  | 885   | 1.94 | 0.14 | 7  |
| 10 F13D12.4a;F13D12.4b | NHGVIMADANK  | 51  | 3334  | 1.96 | 0.08 | 4  |
| 10 F13D12.4a;F13D12.4b | NHGVIMADANK  | 55  | 15683 | 1.98 | 0.06 | 3  |
| 10 F13D12.4a;F13D12.4b | NHGVIMADANK  | 79  | 13150 | 1.99 | 0.11 | 5  |
| 7 F13D12.4a;F13D12.4b  | NHGVIMADANK  | 31  | 1662  | 2.01 | 0.15 | 7  |
| 22 F13D12.4a;F13D12.4b | NHGVIMADANK  | 38  | 4511  | 2.03 | 0.05 | 2  |
| 7 F13D12.4a;F13D12.4b  | NHGVIMADANK  | 52  | 3617  | 2.15 | 0.12 | 6  |
| 7 F13D12.4a;F13D12.4b  | NHGVIMADANK  | 59  | 3094  | 2.23 | 0.13 | 6  |
| 7 F13D12.4a;F13D12.4b  | NHGVIMADANK  | 51  | 1146  | 2.28 | 0.10 | 4  |
| 22 F13D12.4a;F13D12.4b | LQALIK       | 37  | 1554  | 2.30 | 0.18 | 8  |
| 22 F13D12.4a;F13D12.4b | NHGVIMADANK  | 55  | 4934  | 2.36 | 0.09 | 4  |
| 22 F13D12.4a;F13D12.4b | LQALIK       | 41  | 1466  | 2.43 | 0.07 | 3  |
| 7 F13D12.4a;F13D12.4b  | NHGVIMADANK  | 45  | 5495  | 2.68 | 0.11 | 4  |
| 22 F13D12.4a;F13D12.4b | NHGVIMADANK  | 85  | 5024  | 2.71 | 0.07 | 2  |
| 7 F13D12.4a;F13D12.4b  | NHGVIMADANK  | 72  | 4569  | 2.76 | 0.09 | 3  |
| 10 F13D12.4a;F13D12.4b | NHGVIMADANK  | 59  | 9600  | 2.78 | 0.12 | 4  |
| 10 F13D12.4a;F13D12.4b | NHGVIMADANK  | 60  | 12605 | 2.80 | 0.06 | 2  |
| 1 F13D12.4a;F13D12.4b  | NHGVIMADANK  | 41  | 5581  | 2.83 | 0.08 | 3  |
| 7 F13D12.4a;F13D12.4b  | NHGVIMADANK  | 36  | 2169  | 2.87 | 0.11 | 4  |
| 22 F13D12.4a;F13D12.4b | NHGVIMADANK  | 66  | 4439  | 2.92 | 0.07 | 2  |
| 10 F13D12.4a;F13D12.4b | LQALIK       | 29  | 1651  | 3.27 | 0.15 | 4  |
| 10 F13D12.4a;F13D12.4b | LQALIK       | 24  | 1406  | 3.69 | 0.18 | 5  |
| 7 F13D12.6             | QYSGYYNVGTK  | 31  | 1538  | 0.80 | 0.23 | 29 |
| 7 F13D12.6             | QYSGYYNVGTK  | 30  | 1058  | 0.86 | 0.22 | 26 |
| 22 F13D12.6            | QYSGYYNVGTK  | 38  | 1225  | 1.57 | 0.13 | 8  |
| 22 F13E6.3             | AVMLLFK      | 22  | 1641  | 0.73 | 0.50 | 69 |

|                                        |                     |    |        |      |      |    |
|----------------------------------------|---------------------|----|--------|------|------|----|
| 10 F13E6.3                             | AVMLLFK             | 23 | 3666   | 1.70 | 0.45 | 26 |
| 10 F13G3.5a                            | LLIEGLSERFK         | 22 | 1430   | 0.44 | 0.05 | 11 |
| 22 F13G3.5a                            | AGTLVRTAFDSPESK     | 32 | 3624   | 0.44 | 0.31 | 71 |
| 10 F13G3.5a                            | AGTLVRTAFDSPESK     | 16 | 5377   | 0.52 | 0.41 | 80 |
| 10 F13G3.5a                            | AGTLVRTAFDSPESK     | 21 | 5048   | 0.56 | 0.10 | 18 |
| 10 F13G3.5a                            | AGTLVRTAFDSPESK     | 12 | 3915   | 0.67 | 0.14 | 21 |
| 22 F13G3.5a                            | LLIEGLSERFK         | 29 | 1283   | 0.67 | 0.16 | 24 |
| 22 F13G3.5a                            | AGTLVRTAFDSPESK     | 32 | 2668   | 0.72 | 0.33 | 45 |
| 10 F13G3.5a                            | LLIEGLSERFK         | 34 | 2582   | 0.72 | 0.08 | 11 |
| 22 F13G3.5a                            | LLIEGLSERFK         | 43 | 1981   | 0.73 | 0.21 | 29 |
| 10 F13G3.5a                            | AGTLVRTAFDSPESK     | 19 | 5218   | 0.74 | 0.12 | 16 |
| 22 F13G3.5a                            | AGTLVRTAFDSPESK     | 23 | 2465   | 0.76 | 0.18 | 23 |
| 10 F13G3.5a                            | LLIEGLSERFK         | 45 | 2412   | 0.80 | 0.20 | 25 |
| 22 F13G3.5a                            | LLIEGLSERFK         | 24 | 1249   | 0.93 | 0.04 | 4  |
| 22 F13G3.5a                            | LLIEGLSERFK         | 37 | 1637   | 0.98 | 0.13 | 13 |
| 10 F13G3.5a                            | LLIEGLSERFK         | 21 | 1769   | 1.04 | 0.07 | 6  |
| 10 F13G3.5a                            | GHRFIGEESVAGGAK     | 42 | 17653  | 1.24 | 0.20 | 16 |
| 10 F13G3.5a                            | LLIEGLSERFK         | 12 | 994    | 1.40 | 0.20 | 14 |
| 22 F13G3.5a                            | GHRFIGEESVAGGAK     | 18 | 2068   | 1.60 | 0.17 | 11 |
| 10 F13G3.5a                            | GHRFIGEESVAGGAK     | 39 | 16953  | 1.66 | 0.23 | 14 |
| 10 F13G3.5a                            | GHRFIGEESVAGGAK     | 48 | 16036  | 2.00 | 0.16 | 8  |
| 22 F13G3.5a                            | GHRFIGEESVAGGAK     | 45 | 5061   | 3.20 | 0.13 | 4  |
| 7 F13G3.5a;F13G3.5b                    | LLIEGLSERFK         | 23 | 2445   | 0.52 | 0.21 | 40 |
| 7 F13G3.5a;F13G3.5b                    | LLIEGLSERFK         | 15 | 1503   | 0.54 | 0.48 | 88 |
| 7 F13G3.5a;F13G3.5b                    | LLIEGLSERFK         | 22 | 1849   | 0.61 | 0.27 | 44 |
| 7 F13G3.5a;F13G3.5b                    | LLIEGLSERFK         | 22 | 1675   | 0.63 | 0.23 | 37 |
| 7 F13G3.5a;F13G3.5b                    | AGTLVRTAFDSPESK     | 24 | 3095   | 0.64 | 0.16 | 25 |
| 7 F13G3.5a;F13G3.5b                    | GHRFIGEESVAGGAK     | 41 | 5479   | 0.90 | 0.19 | 21 |
| 7 F13G3.5a;F13G3.5b                    | AGTLVRTAFDSPESK     | 15 | 2623   | 1.02 | 0.18 | 17 |
| 7 F13G3.5a;F13G3.5b                    | GHRFIGEESVAGGAK     | 25 | 7173   | 1.90 | 0.16 | 8  |
| 1 F13G3.5b                             | LLIEGLSERFK         | 12 | 743    | 0.65 | 0.12 | 18 |
| 1 F13G3.5b                             | LLIEGLSERFK         | 14 | 1230   | 1.55 | 0.21 | 13 |
| 7 F15G9.4d;F15G9.4a;F15G9.4b;F15G9.4c  | GARLDIPHLK          | 11 | 2467   | 0.32 | 0.19 | 59 |
| 10 F15G9.4d;F15G9.4a;F15G9.4b;F15G9.4c | SVQVLEGGQFK         | 44 | 1004   | 0.55 | 0.23 | 43 |
| 10 F15G9.4d;F15G9.4a;F15G9.4b;F15G9.4c | SVQVLEGGQFK         | 54 | 831    | 0.68 | 0.17 | 26 |
| 22 F15G9.4d;F15G9.4a;F15G9.4b;F15G9.4c | LHVFK               | 16 | 881    | 0.87 | 0.18 | 20 |
| 22 F15G9.4d;F15G9.4a;F15G9.4b;F15G9.4c | IIEVPGVVDVVK        | 30 | 1339   | 0.91 | 0.15 | 16 |
| 22 F15G9.4d;F15G9.4a;F15G9.4b;F15G9.4c | IIEVPGVVDVVK        | 26 | 1127   | 1.11 | 0.12 | 11 |
| 22 F15G9.4d;F15G9.4a;F15G9.4b;F15G9.4c | AVAGGEIILK          | 14 | 504    | 1.19 | 0.15 | 13 |
| 10 F15G9.4d;F15G9.4a;F15G9.4b;F15G9.4c | SVQVLEGGQFK         | 61 | 1033   | 1.19 | 0.18 | 15 |
| 10 F15G9.4d;F15G9.4a;F15G9.4b;F15G9.4c | GARLDIPHLK          | 13 | 1026   | 1.26 | 0.13 | 10 |
| 22 F15G9.4d;F15G9.4a;F15G9.4b;F15G9.4c | YHTGVYK             | 20 | 968    | 1.29 | 0.08 | 6  |
| 10 F15G9.4d;F15G9.4a;F15G9.4b;F15G9.4c | YHTGVYK             | 14 | 1256   | 1.38 | 0.20 | 14 |
| 22 F15G9.4d;F15G9.4a;F15G9.4b;F15G9.4c | YHTGVYK             | 12 | 1197   | 1.44 | 0.17 | 12 |
| 10 F17A9.4                             | IIEGLVASSIK         | 38 | 1288   | 0.84 | 0.19 | 22 |
| 22 F17A9.4                             | IIEGLVASSIK         | 39 | 1620   | 1.19 | 0.15 | 13 |
| 22 F17A9.4                             | IIEGLVASSIK         | 14 | 850    | 1.27 | 0.07 | 6  |
| 10 F17A9.4                             | IIEGLVASSIK         | 28 | 875    | 1.32 | 0.28 | 21 |
| 10 F17A9.4                             | IIEGLVASSIK         | 24 | 911    | 1.40 | 0.14 | 10 |
| 22 F17C11.9a;F17C11.9b;F17C11.9c       | DPFQDMPK            | 22 | 10932  | 0.24 | 0.16 | 68 |
| 22 F17C11.9a;F17C11.9b;F17C11.9c       | GTFVLDNFK           | 45 | 5389   | 0.27 | 0.13 | 47 |
| 22 F17C11.9a;F17C11.9b;F17C11.9c       | GTFVLDNFK           | 46 | 6960   | 0.30 | 0.10 | 33 |
| 22 F17C11.9a;F17C11.9b;F17C11.9c       | DPFQDMPK            | 15 | 8303   | 0.30 | 0.17 | 56 |
| 22 F17C11.9a;F17C11.9b;F17C11.9c       | GTFVLDNFK           | 70 | 156803 | 0.31 | 0.11 | 35 |
| 22 F17C11.9a;F17C11.9b;F17C11.9c       | GTFVLDNFK           | 65 | 151887 | 0.37 | 0.08 | 21 |
| 10 F17C11.9a;F17C11.9b;F17C11.9c       | NELNGQLQVLDRLVK     | 39 | 3149   | 0.38 | 0.06 | 16 |
| 10 F17C11.9a;F17C11.9b;F17C11.9c       | GTFVLDNFK           | 53 | 109757 | 0.41 | 0.06 | 15 |
| 10 F17C11.9a;F17C11.9b;F17C11.9c       | EVLGEVSLASSVAQFNQAK | 77 | 5576   | 0.43 | 0.10 | 24 |
| 10 F17C11.9a;F17C11.9b;F17C11.9c       | GTFVLDNFK           | 69 | 127082 | 0.44 | 0.07 | 15 |
| 22 F17C11.9a;F17C11.9b;F17C11.9c       | GTFVLDNFK           | 27 | 1728   | 0.46 | 0.22 | 48 |
| 22 F17C11.9a;F17C11.9b;F17C11.9c       | GTFVLDNFK           | 32 | 2800   | 0.46 | 0.14 | 30 |
| 22 F17C11.9a;F17C11.9b;F17C11.9c       | NELNGQLQVLDRLVK     | 44 | 1679   | 0.53 | 0.29 | 54 |
| 22 F17C11.9a;F17C11.9b;F17C11.9c       | GTFVLDNFK           | 43 | 5884   | 0.54 | 0.12 | 21 |
| 22 F17C11.9a;F17C11.9b;F17C11.9c       | GTFVLDNFK           | 56 | 4327   | 0.57 | 0.08 | 14 |
| 10 F17C11.9a;F17C11.9b;F17C11.9c       | GTFVLDNFK           | 11 | 1719   | 0.58 | 0.08 | 13 |
| 22 F17C11.9a;F17C11.9b;F17C11.9c       | NELNGQLQVLDRLVK     | 38 | 1449   | 0.59 | 0.16 | 27 |
| 10 F17C11.9a;F17C11.9b;F17C11.9c       | NELNGQLQVLDRLVK     | 49 | 2432   | 0.60 | 0.17 | 28 |
| 22 F17C11.9a;F17C11.9b;F17C11.9c       | GTFVLDNFK           | 32 | 2175   | 0.62 | 0.10 | 17 |
| 10 F17C11.9a;F17C11.9b;F17C11.9c       | GTFVLDNFK           | 47 | 3810   | 0.63 | 0.16 | 25 |
| 22 F17C11.9a;F17C11.9b;F17C11.9c       | NELNGQLQVLDRLVK     | 54 | 2634   | 0.70 | 0.27 | 39 |
| 10 F17C11.9a;F17C11.9b;F17C11.9c       | GTFVLDNFK           | 27 | 1869   | 0.70 | 0.08 | 11 |
| 10 F17C11.9a;F17C11.9b;F17C11.9c       | DPFQDMPK            | 19 | 14401  | 0.73 | 0.16 | 22 |
| 22 F17C11.9a;F17C11.9b;F17C11.9c       | GTFVLDNFK           | 31 | 2495   | 0.78 | 0.17 | 22 |
| 10 F17C11.9a;F17C11.9b;F17C11.9c       | EVLGEVSLASSVAQFNQAK | 65 | 4538   | 0.82 | 0.23 | 28 |
| 22 F17C11.9a;F17C11.9b;F17C11.9c       | NELNGQLQVLDRLVK     | 38 | 1858   | 0.83 | 0.15 | 18 |
| 10 F17C11.9a;F17C11.9b;F17C11.9c       | GTFVLDNFK           | 13 | 1330   | 0.84 | 0.15 | 18 |
| 22 F17C11.9a;F17C11.9b;F17C11.9c       | EVLGEVSLASSVAQFNQAK | 41 | 4419   | 0.87 | 0.11 | 13 |
| 22 F17C11.9a;F17C11.9b;F17C11.9c       | NELNGQLQVLDRLVK     | 12 | 8563   | 0.88 | 0.21 | 24 |
| 22 F17C11.9a;F17C11.9b;F17C11.9c       | NELNGQLQVLDRLVK     | 43 | 3549   | 0.91 | 0.16 | 17 |
| 22 F17C11.9a;F17C11.9b;F17C11.9c       | GTFVLDNFK           | 17 | 973    | 0.92 | 0.12 | 13 |
| 10 F17C11.9a;F17C11.9b;F17C11.9c       | NELNGQLQVLDRLVK     | 11 | 6160   | 1.01 | 0.61 | 61 |
| 22 F17C11.9a;F17C11.9b;F17C11.9c       | GTFVLDNFK           | 39 | 2419   | 1.02 | 0.13 | 13 |
| 22 F17C11.9a;F17C11.9b;F17C11.9c       | EVLGEVSLASSVAQFNQAK | 87 | 6308   | 1.03 | 0.12 | 11 |
| 22 F17C11.9a;F17C11.9b;F17C11.9c       | EVLGEVSLASSVAQFNQAK | 76 | 2702   | 1.04 | 0.10 | 10 |
| 10 F17C11.9a;F17C11.9b;F17C11.9c       | GTFVLDNFK           | 12 | 1169   | 1.06 | 0.06 | 6  |
| 22 F17C11.9a;F17C11.9b;F17C11.9c       | NELNGQLQVLDRLVK     | 71 | 8528   | 1.08 | 0.08 | 8  |
| 22 F17C11.9a;F17C11.9b;F17C11.9c       | EVLGEVSLASSVAQFNQAK | 29 | 4112   | 1.13 | 0.17 | 15 |
| 22 F17C11.9a;F17C11.9b;F17C11.9c       | GTFVLDNFK           | 11 | 1353   | 1.13 | 0.09 | 8  |
| 22 F17C11.9a;F17C11.9b;F17C11.9c       | GTFVLDNFK           | 34 | 6259   | 1.14 | 0.07 | 6  |
| 10 F17C11.9a;F17C11.9b;F17C11.9c       | GTFVLDNFK           | 25 | 1664   | 1.18 | 0.19 | 16 |
| 22 F17C11.9a;F17C11.9b;F17C11.9c       | EVLGEVSLASSVAQFNQAK | 39 | 4331   | 1.20 | 0.09 | 8  |
| 22 F17C11.9a;F17C11.9b;F17C11.9c       | EVLGEVSLASSVAQFNQAK | 97 | 4624   | 1.22 | 0.13 | 11 |
| 22 F17C11.9a;F17C11.9b;F17C11.9c       | EVLGEVSLASSVAQFNQAK | 21 | 1898   | 1.24 | 0.26 | 21 |
| 22 F17C11.9a;F17C11.9b;F17C11.9c       | EVLGEVSLASSVAQFNQAK | 14 | 1897   | 1.25 | 0.14 | 11 |
| 10 F17C11.9a;F17C11.9b;F17C11.9c       | GTFVLDNFK           | 43 | 3298   | 1.28 | 0.10 | 8  |
| 22 F17C11.9a;F17C11.9b;F17C11.9c       | EVLGEVSLASSVAQFNQAK | 11 | 2828   | 1.33 | 0.08 | 6  |
| 22 F17C11.9a;F17C11.9b;F17C11.9c       | GTFVLDNFK           | 26 | 4022   | 1.33 | 0.07 | 6  |
| 10 F17C11.9a;F17C11.9b;F17C11.9c       | GTFVLDNFK           | 13 | 1352   | 1.36 | 0.09 | 6  |
| 10 F17C11.9a;F17C11.9b;F17C11.9c       | GTFVLDNFK           | 13 | 715    | 1.41 | 0.18 | 13 |
| 22 F17C11.9a;F17C11.9b;F17C11.9c       | EVLGEVSLASSVAQFNQAK | 12 | 2395   | 1.47 | 0.13 | 9  |
| 10 F17C11.9a;F17C11.9b;F17C11.9c       | GTFVLDNFK           | 51 | 11295  | 1.67 | 0.05 | 3  |

|                                  |                     |     |        |      |      |    |
|----------------------------------|---------------------|-----|--------|------|------|----|
| 10 F17C11.9a;F17C11.9b;F17C11.9c | GTFVLDNFK           | 17  | 1681   | 1.74 | 0.15 | 9  |
| 22 F17C11.9a;F17C11.9b;F17C11.9c | EVLGEVSLASSVAQFNQAK | 15  | 3075   | 2.05 | 0.13 | 6  |
| 22 F17C11.9a;F17C11.9b;F17C11.9c | GTFVLDNFK           | 49  | 5747   | 2.44 | 0.08 | 3  |
| 22 F17C11.9a;F17C11.9b;F17C11.9c | GTFVLDNFK           | 46  | 4274   | 2.46 | 0.10 | 4  |
| 10 F17C11.9a;F17C11.9b;F17C11.9c | GTFVLDNFK           | 57  | 6487   | 2.49 | 0.09 | 4  |
| 10 F17C11.9a;F17C11.9b;F17C11.9c | GTFVLDNFK           | 45  | 4804   | 2.83 | 0.06 | 2  |
| 10 F17C11.9a;F17C11.9b;F17C11.9c | GTFVLDNFK           | 14  | 645    | 2.96 | 0.20 | 7  |
| 10 F17C11.9a;F17C11.9b;F17C11.9c | NELNGQLQVLDRLVLK    | 14  | 2370   | 5.85 | 0.49 | 8  |
| 10 F17C11.9a;F17C11.9b;F17C11.9c | GTFVLDNFK           | 60  | 4204   | 7.23 | 0.14 | 2  |
| 10 F17C11.9a;F17C11.9b;F17C11.9c | GTFVLDNFK           | 36  | 2478   | 7.94 | 0.08 | 1  |
| 7 F17C11.9a;F17C11.9c;F17C11.9b  | EVLGEVSLASSVAQFNQAK | 55  | 1524   | 0.27 | 0.21 | 76 |
| 7 F17C11.9a;F17C11.9c;F17C11.9b  | GTFVLDNFK           | 65  | 127236 | 0.40 | 0.08 | 20 |
| 7 F17C11.9a;F17C11.9c;F17C11.9b  | GTFVLDNFK           | 72  | 120032 | 0.41 | 0.06 | 13 |
| 7 F17C11.9a;F17C11.9c;F17C11.9b  | GTFVLDNFK           | 19  | 1039   | 0.45 | 0.11 | 25 |
| 7 F17C11.9a;F17C11.9c;F17C11.9b  | DPFQDMPK            | 14  | 3716   | 0.47 | 0.28 | 59 |
| 7 F17C11.9a;F17C11.9c;F17C11.9b  | GTFVLDNFK           | 62  | 3843   | 0.50 | 0.12 | 25 |
| 7 F17C11.9a;F17C11.9c;F17C11.9b  | GTFVLDNFK           | 18  | 1581   | 0.52 | 0.12 | 23 |
| 7 F17C11.9a;F17C11.9c;F17C11.9b  | GTFVLDNFK           | 56  | 4811   | 0.54 | 0.12 | 23 |
| 1 F17C11.9a;F17C11.9c;F17C11.9b  | GTFVLDNFK           | 71  | 5300   | 0.57 | 0.08 | 15 |
| 7 F17C11.9a;F17C11.9c;F17C11.9b  | EVLGEVSLASSVAQFNQAK | 18  | 1542   | 0.60 | 0.13 | 22 |
| 7 F17C11.9a;F17C11.9c;F17C11.9b  | GTFVLDNFK           | 22  | 2013   | 0.65 | 0.13 | 20 |
| 7 F17C11.9a;F17C11.9c;F17C11.9b  | GTFVLDNFK           | 29  | 1586   | 0.69 | 0.13 | 19 |
| 7 F17C11.9a;F17C11.9c;F17C11.9b  | GTFVLDNFK           | 26  | 1921   | 0.70 | 0.24 | 34 |
| 7 F17C11.9a;F17C11.9c;F17C11.9b  | GTFVLDNFK           | 15  | 591    | 0.71 | 0.18 | 26 |
| 1 F17C11.9a;F17C11.9c;F17C11.9b  | GTFVLDNFK           | 26  | 2007   | 0.72 | 0.15 | 21 |
| 1 F17C11.9a;F17C11.9c;F17C11.9b  | GTFVLDNFK           | 20  | 352    | 0.78 | 0.09 | 12 |
| 1 F17C11.9a;F17C11.9c;F17C11.9b  | GTFVLDNFK           | 10  | 417    | 0.81 | 0.09 | 11 |
| 7 F17C11.9a;F17C11.9c;F17C11.9b  | EVLGEVSLASSVAQFNQAK | 23  | 1624   | 0.82 | 0.15 | 19 |
| 1 F17C11.9a;F17C11.9c;F17C11.9b  | GTFVLDNFK           | 13  | 702    | 0.89 | 0.15 | 17 |
| 7 F17C11.9a;F17C11.9c;F17C11.9b  | NELNGQLQVLDRLVLK    | 17  | 691    | 0.92 | 0.07 | 7  |
| 1 F17C11.9a;F17C11.9c;F17C11.9b  | GTFVLDNFK           | 10  | 363    | 0.97 | 0.33 | 34 |
| 7 F17C11.9a;F17C11.9c;F17C11.9b  | GTFVLDNFK           | 13  | 775    | 0.97 | 0.19 | 19 |
| 7 F17C11.9a;F17C11.9c;F17C11.9b  | VLIAAK              | 39  | 1228   | 0.97 | 0.08 | 8  |
| 7 F17C11.9a;F17C11.9c;F17C11.9b  | GTFVLDNFK           | 19  | 1474   | 1.00 | 0.24 | 24 |
| 7 F17C11.9a;F17C11.9c;F17C11.9b  | VLIAAK              | 20  | 1782   | 1.04 | 0.09 | 9  |
| 7 F17C11.9a;F17C11.9c;F17C11.9b  | GTFVLDNFK           | 13  | 1070   | 1.06 | 0.19 | 18 |
| 7 F17C11.9a;F17C11.9c;F17C11.9b  | EVLGEVSLASSVAQFNQAK | 71  | 1099   | 1.07 | 0.18 | 17 |
| 1 F17C11.9a;F17C11.9c;F17C11.9b  | GTFVLDNFK           | 60  | 86439  | 1.27 | 0.05 | 4  |
| 1 F17C11.9a;F17C11.9c;F17C11.9b  | GTFVLDNFK           | 10  | 316    | 1.52 | 0.15 | 10 |
| 7 F17C11.9a;F17C11.9c;F17C11.9b  | GTFVLDNFK           | 46  | 8725   | 1.60 | 0.10 | 6  |
| 7 F17C11.9a;F17C11.9c;F17C11.9b  | GTFVLDNFK           | 20  | 4754   | 1.68 | 0.04 | 2  |
| 7 F17C11.9a;F17C11.9c;F17C11.9b  | GTFVLDNFK           | 21  | 1569   | 2.07 | 0.14 | 7  |
| 7 F17C11.9a;F17C11.9c;F17C11.9b  | GTFVLDNFK           | 17  | 1026   | 2.13 | 0.12 | 6  |
| 7 F17C11.9a;F17C11.9c;F17C11.9b  | GTFVLDNFK           | 43  | 4961   | 2.87 | 0.13 | 5  |
| 7 F17C11.9a;F17C11.9c;F17C11.9b  | GTFVLDNFK           | 13  | 3025   | 3.57 | 0.13 | 4  |
| 10 F17C8.9                       | LLIPAGALWGANDIQK    | 16  | 1185   | 0.69 | 0.15 | 21 |
| 22 F17C8.9                       | LLIPAGALWGANDIQK    | 22  | 483    | 0.92 | 0.36 | 39 |
| 10 F17C8.9                       | LLIPAGALWGANDIQK    | 10  | 698    | 0.98 | 0.16 | 16 |
| 22 F18C12.1                      | LSMEQLK             | 12  | 855    | 1.97 | 0.44 | 23 |
| 22 F18E2.2                       | RLALLEEEAK          | 18  | 1566   | 0.77 | 0.16 | 21 |
| 22 F20B6.2                       | AVVQVFEGTSGIDAK     | 55  | 1248   | 0.26 | 0.13 | 51 |
| 22 F20B6.2                       | AVVQVFEGTSGIDAK     | 72  | 1898   | 0.31 | 0.12 | 38 |
| 7 F20B6.2                        | AVVQVFEGTSGIDAK     | 90  | 6542   | 0.40 | 0.12 | 31 |
| 7 F20B6.2                        | RIPESTLEK           | 18  | 1798   | 0.44 | 0.16 | 37 |
| 7 F20B6.2                        | AVVQVFEGTSGIDAK     | 78  | 1175   | 0.48 | 0.17 | 36 |
| 10 F20B6.2                       | FPQFSEIVK           | 18  | 4839   | 0.48 | 0.13 | 26 |
| 10 F20B6.2                       | AVVQVFEGTSGIDAK     | 80  | 2236   | 0.50 | 0.10 | 19 |
| 7 F20B6.2                        | ITLPDGSK            | 13  | 1703   | 0.53 | 0.46 | 87 |
| 22 F20B6.2                       | AVVQVFEGTSGIDAK     | 79  | 1653   | 0.53 | 0.19 | 37 |
| 22 F20B6.2                       | AVVQVFEGTSGIDAK     | 31  | 546    | 0.53 | 0.15 | 28 |
| 10 F20B6.2                       | RIPESTLEK           | 27  | 54172  | 0.54 | 0.08 | 14 |
| 10 F20B6.2                       | AVVQVFEGTSGIDAK     | 124 | 4599   | 0.55 | 0.15 | 27 |
| 10 F20B6.2                       | AVVQVFEGTSGIDAK     | 85  | 646    | 0.55 | 0.09 | 17 |
| 22 F20B6.2                       | AVVQVFEGTSGIDAK     | 79  | 1205   | 0.56 | 0.19 | 34 |
| 22 F20B6.2                       | AVVQVFEGTSGIDAK     | 69  | 1599   | 0.58 | 0.27 | 47 |
| 10 F20B6.2                       | AVVQVFEGTSGIDAK     | 46  | 484    | 0.58 | 0.09 | 15 |
| 7 F20B6.2                        | AVVQVFEGTSGIDAK     | 48  | 451    | 0.59 | 0.27 | 45 |
| 7 F20B6.2                        | ITLPDGSK            | 29  | 8308   | 0.60 | 0.41 | 69 |
| 22 F20B6.2                       | AVVQVFEGTSGIDAK     | 15  | 1893   | 0.63 | 0.08 | 13 |
| 10 F20B6.2                       | AVVQVFEGTSGIDAK     | 42  | 442    | 0.64 | 0.15 | 23 |
| 7 F20B6.2                        | AVVQVFEGTSGIDAK     | 65  | 2133   | 0.65 | 0.20 | 30 |
| 10 F20B6.2                       | FPQFSEIVK           | 11  | 5828   | 0.71 | 0.22 | 31 |
| 7 F20B6.2                        | AVVQVFEGTSGIDAK     | 51  | 713    | 0.73 | 0.15 | 20 |
| 10 F20B6.2                       | AVVQVFEGTSGIDAK     | 75  | 803    | 0.73 | 0.18 | 24 |
| 10 F20B6.2                       | RIPESTLEK           | 25  | 2428   | 0.74 | 0.10 | 14 |
| 7 F20B6.2                        | FPQFSEIVK           | 26  | 11078  | 0.74 | 0.09 | 13 |
| 10 F20B6.2                       | AVVQVFEGTSGIDAK     | 52  | 440    | 0.75 | 0.20 | 27 |
| 7 F20B6.2                        | RIPESTLEK           | 15  | 1968   | 0.76 | 0.20 | 26 |
| 7 F20B6.2                        | AVVQVFEGTSGIDAK     | 70  | 1023   | 0.77 | 0.12 | 16 |
| 10 F20B6.2                       | RIPESTLEK           | 21  | 6063   | 0.78 | 0.11 | 14 |
| 10 F20B6.2                       | AVVQVFEGTSGIDAK     | 20  | 598    | 0.78 | 0.12 | 15 |
| 7 F20B6.2                        | AVVQVFEGTSGIDAK     | 85  | 1187   | 0.79 | 0.19 | 24 |
| 7 F20B6.2                        | AVVQVFEGTSGIDAK     | 40  | 740    | 0.83 | 0.26 | 32 |
| 7 F20B6.2                        | RIPESTLEK           | 30  | 45099  | 0.83 | 0.06 | 8  |
| 10 F20B6.2                       | RSGQVLEISK          | 47  | 19018  | 0.84 | 0.05 | 5  |
| 1 F20B6.2                        | RSGQVLEISK          | 55  | 21682  | 0.84 | 0.16 | 19 |
| 22 F20B6.2                       | RIPESTLEK           | 31  | 2457   | 0.85 | 0.28 | 32 |
| 10 F20B6.2                       | RSGQVLEISK          | 40  | 20968  | 0.86 | 0.12 | 14 |
| 7 F20B6.2                        | AVVQVFEGTSGIDAK     | 58  | 1497   | 0.87 | 0.08 | 9  |
| 1 F20B6.2                        | RSGQVLEISK          | 44  | 22696  | 0.87 | 0.10 | 12 |
| 10 F20B6.2                       | RSGQVLEISK          | 21  | 3098   | 0.88 | 0.16 | 18 |
| 10 F20B6.2                       | RIPESTLEK           | 11  | 5165   | 0.90 | 0.17 | 19 |
| 10 F20B6.2                       | AVVQVFEGTSGIDAK     | 55  | 1007   | 0.90 | 0.28 | 31 |
| 7 F20B6.2                        | AVVQVFEGTSGIDAK     | 15  | 390    | 0.91 | 0.25 | 28 |
| 7 F20B6.2                        | AVVQVFEGTSGIDAK     | 59  | 1279   | 0.91 | 0.16 | 18 |
| 7 F20B6.2                        | RSGQVLEISK          | 29  | 2483   | 0.92 | 0.05 | 5  |
| 22 F20B6.2                       | AVVQVFEGTSGIDAK     | 48  | 546    | 0.93 | 0.39 | 42 |
| 10 F20B6.2                       | AVVQVFEGTSGIDAK     | 57  | 635    | 0.93 | 0.14 | 15 |
| 22 F20B6.2                       | RSGQVLEISK          | 42  | 18399  | 0.94 | 0.14 | 15 |
| 7 F20B6.2                        | AVVQVFEGTSGIDAK     | 39  | 990    | 0.95 | 0.25 | 26 |
| 7 F20B6.2                        | RSGQVLEISK          | 49  | 18846  | 0.95 | 0.08 | 8  |

|             |                           |     |       |      |      |     |
|-------------|---------------------------|-----|-------|------|------|-----|
| 7 F20B6.2   | RIPESTLEK                 | 13  | 2066  | 0.96 | 0.30 | 32  |
| 7 F20B6.2   | RIPESTLEK                 | 16  | 2152  | 0.96 | 0.11 | 12  |
| 7 F20B6.2   | RSGQVLEISK                | 21  | 1687  | 0.96 | 0.08 | 8   |
| 22 F20B6.2  | RSGQVLEISK                | 21  | 11190 | 0.96 | 0.20 | 21  |
| 7 F20B6.2   | RSGQVLEISK                | 30  | 3288  | 0.96 | 0.09 | 10  |
| 7 F20B6.2   | RIPESTLEK                 | 27  | 2930  | 0.96 | 0.07 | 7   |
| 22 F20B6.2  | RIPESTLEK                 | 15  | 6147  | 0.98 | 0.13 | 13  |
| 22 F20B6.2  | RSGQVLEISK                | 45  | 13306 | 0.99 | 0.06 | 6   |
| 7 F20B6.2   | RIPESTLEK                 | 13  | 2074  | 0.99 | 0.09 | 9   |
| 22 F20B6.2  | AVVQVFEGTSGIDAK           | 68  | 1071  | 1.02 | 0.14 | 13  |
| 1 F20B6.2   | RIPESTLEK                 | 16  | 3073  | 1.03 | 0.36 | 35  |
| 22 F20B6.2  | RIPESTLEK                 | 18  | 4696  | 1.03 | 0.18 | 18  |
| 7 F20B6.2   | RSGQVLEISK                | 18  | 3256  | 1.04 | 0.17 | 16  |
| 7 F20B6.2   | RSGQVLEISK                | 32  | 16674 | 1.08 | 0.08 | 7   |
| 10 F20B6.2  | RIPESTLEK                 | 11  | 4107  | 1.10 | 0.10 | 9   |
| 1 F20B6.2   | AVVQVFEGTSGIDAK           | 18  | 225   | 1.10 | 0.26 | 23  |
| 22 F20B6.2  | AVVQVFEGTSGIDAK           | 20  | 525   | 1.11 | 0.23 | 20  |
| 7 F20B6.2   | AVVQVFEGTSGIDAK           | 28  | 608   | 1.14 | 0.17 | 15  |
| 1 F20B6.2   | RIPESTLEK                 | 25  | 2191  | 1.15 | 0.28 | 25  |
| 1 F20B6.2   | RIPESTLEK                 | 23  | 3774  | 1.16 | 0.11 | 10  |
| 7 F20B6.2   | RIPESTLEK                 | 29  | 2711  | 1.16 | 0.15 | 13  |
| 10 F20B6.2  | AVVQVFEGTSGIDAK           | 13  | 546   | 1.16 | 0.21 | 18  |
| 7 F20B6.2   | RIPESTLEK                 | 19  | 3391  | 1.18 | 0.11 | 9   |
| 22 F20B6.2  | RSGQVLEISK                | 26  | 14424 | 1.20 | 0.09 | 7   |
| 1 F20B6.2   | AVVQVFEGTSGIDAK           | 27  | 300   | 1.21 | 0.18 | 15  |
| 7 F20B6.2   | RIPESTLEK                 | 27  | 2667  | 1.22 | 0.17 | 14  |
| 7 F20B6.2   | AVVQVFEGTSGIDAK           | 65  | 704   | 1.22 | 0.32 | 26  |
| 7 F20B6.2   | RSGQVLEISK                | 20  | 2718  | 1.22 | 0.15 | 12  |
| 10 F20B6.2  | AVVQVFEGTSGIDAK           | 15  | 345   | 1.23 | 0.12 | 10  |
| 1 F20B6.2   | AVVQVFEGTSGIDAK           | 29  | 418   | 1.28 | 0.04 | 3   |
| 10 F20B6.2  | RSGQVLEISK                | 17  | 2496  | 1.32 | 0.09 | 7   |
| 22 F20B6.2  | AVVQVFEGTSGIDAK           | 63  | 1034  | 1.32 | 0.20 | 15  |
| 1 F20B6.2   | AVVQVFEGTSGIDAK           | 76  | 1545  | 1.34 | 0.14 | 10  |
| 22 F20B6.2  | AVVQVFEGTSGIDAK           | 21  | 438   | 1.34 | 0.02 | 2   |
| 10 F20B6.2  | AVVQVFEGTSGIDAK           | 28  | 348   | 1.35 | 0.19 | 14  |
| 1 F20B6.2   | RSGQVLEISK                | 47  | 7574  | 1.35 | 0.09 | 6   |
| 22 F20B6.2  | AVVQVFEGTSGIDAK           | 28  | 611   | 1.36 | 0.22 | 16  |
| 1 F20B6.2   | RIPESTLEK                 | 30  | 8777  | 1.38 | 0.16 | 11  |
| 10 F20B6.2  | AVVQVFEGTSGIDAK           | 30  | 542   | 1.39 | 0.33 | 23  |
| 1 F20B6.2   | RSGQVLEISK                | 29  | 4797  | 1.42 | 0.10 | 7   |
| 1 F20B6.2   | RIPESTLEK                 | 13  | 3782  | 1.48 | 0.10 | 7   |
| 10 F20B6.2  | RIPESTLEK                 | 10  | 2951  | 1.50 | 0.09 | 6   |
| 1 F20B6.2   | RIPESTLEK                 | 18  | 2572  | 1.52 | 0.05 | 3   |
| 7 F20B6.2   | AVVQVFEGTSGIDAK           | 77  | 1898  | 1.53 | 0.19 | 13  |
| 10 F20B6.2  | RIPESTLEK                 | 18  | 6033  | 1.53 | 0.08 | 5   |
| 10 F20B6.2  | FPQFSEIVK                 | 11  | 18669 | 1.55 | 0.15 | 9   |
| 7 F20B6.2   | RIPESTLEK                 | 25  | 3242  | 1.57 | 0.15 | 10  |
| 1 F20B6.2   | AVVQVFEGTSGIDAK           | 37  | 477   | 1.60 | 0.21 | 13  |
| 1 F20B6.2   | RIPESTLEK                 | 26  | 6037  | 1.61 | 0.19 | 12  |
| 1 F20B6.2   | AVVQVFEGTSGIDAK           | 58  | 325   | 1.65 | 0.28 | 17  |
| 10 F20B6.2  | RSGQVLEISK                | 41  | 16657 | 1.66 | 0.06 | 4   |
| 1 F20B6.2   | RSGQVLEISK                | 17  | 7303  | 1.69 | 0.07 | 4   |
| 22 F20B6.2  | RSGQVLEISK                | 41  | 13500 | 1.70 | 0.09 | 5   |
| 7 F20B6.2   | RSGQVLEISK                | 29  | 20249 | 1.72 | 0.10 | 6   |
| 10 F20B6.2  | RSGQVLEISK                | 41  | 11435 | 1.73 | 0.06 | 3   |
| 22 F20B6.2  | RIPESTLEK                 | 14  | 6468  | 1.74 | 0.13 | 7   |
| 22 F20B6.2  | AVVQVFEGTSGIDAK           | 83  | 1255  | 1.75 | 0.14 | 8   |
| 22 F20B6.2  | RSGQVLEISK                | 39  | 8192  | 1.75 | 0.11 | 7   |
| 1 F20B6.2   | RIPESTLEK                 | 28  | 4043  | 1.79 | 0.07 | 4   |
| 1 F20B6.2   | RSGQVLEISK                | 13  | 1523  | 1.84 | 0.21 | 11  |
| 7 F20B6.2   | RSGQVLEISK                | 44  | 27166 | 1.86 | 0.19 | 10  |
| 22 F20B6.2  | FPQFSEIVK                 | 12  | 4274  | 1.88 | 0.13 | 7   |
| 1 F20B6.2   | RSGQVLEISK                | 19  | 6676  | 1.91 | 0.06 | 3   |
| 10 F20B6.2  | AVVQVFEGTSGIDAK           | 62  | 1250  | 1.98 | 0.15 | 8   |
| 22 F20B6.2  | AVVQVFEGTSGIDAK           | 40  | 982   | 2.05 | 0.23 | 11  |
| 22 F20B6.2  | AVVQVFEGTSGIDAK           | 82  | 2563  | 2.06 | 0.16 | 8   |
| 1 F20B6.2   | AVVQVFEGTSGIDAK           | 73  | 553   | 2.21 | 0.14 | 6   |
| 22 F20B6.2  | AVVQVFEGTSGIDAK           | 71  | 902   | 2.31 | 0.18 | 8   |
| 22 F20B6.2  | RIPESTLEK                 | 24  | 9376  | 2.47 | 0.10 | 4   |
| 1 F20B6.2   | AVVQVFEGTSGIDAK           | 73  | 821   | 4.28 | 0.25 | 6   |
| 10 F20G2.2  | SLITGANRGIGLGLLK          | 74  | 1713  | 0.36 | 0.17 | 46  |
| 22 F20G2.2  | NGGDGYSINRAAIVNISSTAASVEK | 52  | 2622  | 0.52 | 0.14 | 28  |
| 10 F20G2.2  | SLITGANRGIGLGLLK          | 62  | 1018  | 0.54 | 0.12 | 22  |
| 10 F20G2.2  | NGGDGYSINRAAIVNISSTAASVEK | 70  | 2968  | 0.64 | 0.12 | 18  |
| 10 F20G2.2  | NGGDGYSINRAAIVNISSTAASVEK | 66  | 4034  | 0.74 | 0.12 | 16  |
| 22 F20G2.2  | NGGDGYSINRAAIVNISSTAASVEK | 32  | 2328  | 0.75 | 0.06 | 8   |
| 22 F20G2.2  | SLITGANRGIGLGLLK          | 42  | 1172  | 0.94 | 0.20 | 21  |
| 22 F20G2.2  | SLITGANRGIGLGLLK          | 40  | 6333  | 1.31 | 0.19 | 14  |
| 22 F20G2.2  | SLITGANRGIGLGLLK          | 36  | 5501  | 1.33 | 0.23 | 17  |
| 22 F20G2.2  | SLITGANRGIGLGLLK          | 69  | 2036  | 1.37 | 0.15 | 11  |
| 22 F20G2.2  | SLITGANRGIGLGLLK          | 83  | 2593  | 1.47 | 0.12 | 8   |
| 10 F20G4.3  | ALVLSNELSEK               | 40  | 546   | 0.75 | 0.15 | 20  |
| 10 F20G4.3  | SADETLNSNLLK              | 13  | 383   | 0.81 | 0.18 | 23  |
| 1 F20G4.3   | VQREHYLLEDLSLK            | 14  | 708   | 0.82 | 0.23 | 28  |
| 10 F20G4.3  | VQREHYLLEDLSLK            | 11  | 1726  | 0.97 | 0.08 | 9   |
| 22 F20G4.3  | ALVLSNELSEK               | 32  | 826   | 1.05 | 0.15 | 14  |
| 10 F20G4.3  | SLLAEARK                  | 18  | 1661  | 1.06 | 0.04 | 4   |
| 1 F20G4.3   | SLLAEARK                  | 15  | 1087  | 1.06 | 0.09 | 9   |
| 10 F20G4.3  | SLLAEARK                  | 18  | 2055  | 1.08 | 0.07 | 7   |
| 10 F20G4.3  | VQREHYLLEDLSLK            | 10  | 1526  | 1.08 | 0.10 | 9   |
| 10 F20G4.3  | ALVLSNELSEK               | 16  | 640   | 1.09 | 0.15 | 14  |
| 22 F20G4.3  | SLLAEARK                  | 14  | 1315  | 1.15 | 0.15 | 13  |
| 22 F20G4.3  | TVLHSQLK                  | 16  | 1798  | 1.35 | 0.10 | 7   |
| 22 F20G4.3  | VQREHYLLEDLSLK            | 14  | 1702  | 1.47 | 0.05 | 4   |
| 1 F20G4.3   | TVLHSQLK                  | 23  | 1105  | 1.65 | 0.09 | 5   |
| 10 F20G4.3  | TVLHSQLK                  | 17  | 3804  | 1.66 | 0.10 | 6   |
| 7 F20G4.3   | TVLHSQLK                  | 22  | 2622  | 1.84 | 0.13 | 7   |
| 7 F20G4.3   | TVLHSQLK                  | 11  | 1068  | 2.28 | 0.24 | 10  |
| 10 F20H11.3 | VALLGAAGGIGQPLGLLK        | 111 | 2939  | 0.14 | 0.19 | 135 |
| 22 F20H11.3 | VALLGAAGGIGQPLGLLK        | 48  | 1384  | 0.23 | 0.13 | 55  |
| 22 F20H11.3 | VALLGAAGGIGQPLGLLK        | 113 | 2705  | 0.24 | 0.39 | 165 |

|             |                                 |     |       |      |      |    |
|-------------|---------------------------------|-----|-------|------|------|----|
| 10 F20H11.3 | VALLGAAGGIGQPLGLLLK             | 85  | 2386  | 0.29 | 0.18 | 64 |
| 7 F20H11.3  | VALLGAAGGIGQPLGLLLK             | 111 | 2612  | 0.30 | 0.27 | 92 |
| 22 F20H11.3 | ALIAIITNPVNSTVPIASEVLK          | 45  | 2886  | 0.30 | 0.15 | 50 |
| 1 F20H11.3  | VALLGAAGGIGQPLGLLLK             | 70  | 1346  | 0.32 | 0.10 | 30 |
| 1 F20H11.3  | VALLGAAGGIGQPLGLLLK             | 51  | 1088  | 0.35 | 0.21 | 61 |
| 1 F20H11.3  | FSEEEISK                        | 21  | 1731  | 0.38 | 0.15 | 40 |
| 22 F20H11.3 | ALIAIITNPVNSTVPIASEVLK          | 35  | 3249  | 0.38 | 0.13 | 33 |
| 1 F20H11.3  | LTPRIQDAGTEVVNAK                | 11  | 817   | 0.38 | 0.20 | 53 |
| 22 F20H11.3 | QDPLVAHLALYDVVNTPGVAADLSHIDSNAK | 78  | 3887  | 0.39 | 0.20 | 52 |
| 22 F20H11.3 | LTPRIQDAGTEVVNAK                | 31  | 15078 | 0.40 | 0.29 | 74 |
| 22 F20H11.3 | VALLGAAGGIGQPLGLLLK             | 82  | 3216  | 0.40 | 0.19 | 47 |
| 7 F20H11.3  | FSEEEISK                        | 30  | 1412  | 0.41 | 0.22 | 55 |
| 22 F20H11.3 | FSEEEISK                        | 27  | 2118  | 0.41 | 0.23 | 55 |
| 22 F20H11.3 | ALIAIITNPVNSTVPIASEVLK          | 46  | 2386  | 0.42 | 0.17 | 41 |
| 1 F20H11.3  | FSEEEISK                        | 24  | 798   | 0.44 | 0.23 | 53 |
| 7 F20H11.3  | LIDASVPELNK                     | 13  | 1405  | 0.44 | 0.25 | 56 |
| 1 F20H11.3  | LTPRIQDAGTEVVNAK                | 13  | 2338  | 0.46 | 0.34 | 74 |
| 22 F20H11.3 | RVFGVTTLDVVRSQAFVSELK           | 23  | 4141  | 0.48 | 0.25 | 51 |
| 10 F20H11.3 | LTPRIQDAGTEVVNAK                | 19  | 5609  | 0.49 | 0.21 | 42 |
| 1 F20H11.3  | LIDASVPELNK                     | 10  | 1351  | 0.49 | 0.13 | 26 |
| 22 F20H11.3 | RVFGVTTLDVVRSQAFVSELK           | 11  | 7517  | 0.49 | 0.28 | 58 |
| 22 F20H11.3 | VALLGAAGGIGQPLGLLLK             | 51  | 2175  | 0.50 | 0.34 | 67 |
| 22 F20H11.3 | FSEEEISK                        | 29  | 2332  | 0.51 | 0.16 | 31 |
| 22 F20H11.3 | ALIAIITNPVNSTVPIASEVLK          | 35  | 3257  | 0.51 | 0.17 | 34 |
| 1 F20H11.3  | FSEEEISK                        | 15  | 1240  | 0.51 | 0.28 | 54 |
| 7 F20H11.3  | FSEEEISK                        | 17  | 1093  | 0.51 | 0.33 | 65 |
| 22 F20H11.3 | LTPRIQDAGTEVVNAK                | 13  | 4515  | 0.53 | 0.27 | 52 |
| 1 F20H11.3  | GVEYFSTPVELGPNNGVEK             | 41  | 1941  | 0.54 | 0.15 | 27 |
| 7 F20H11.3  | FSEEEISK                        | 22  | 833   | 0.54 | 0.28 | 51 |
| 22 F20H11.3 | FSEEEISK                        | 37  | 1841  | 0.55 | 0.53 | 97 |
| 1 F20H11.3  | LIDASVPELNK                     | 36  | 2216  | 0.55 | 0.13 | 23 |
| 7 F20H11.3  | LTPRIQDAGTEVVNAK                | 33  | 2628  | 0.55 | 0.31 | 56 |
| 22 F20H11.3 | LTPRIQDAGTEVVNAK                | 16  | 13578 | 0.56 | 0.23 | 41 |
| 22 F20H11.3 | VALLGAAGGIGQPLGLLLK             | 65  | 2547  | 0.56 | 0.12 | 22 |
| 1 F20H11.3  | LTPRIQDAGTEVVNAK                | 11  | 893   | 0.57 | 0.24 | 43 |
| 7 F20H11.3  | FSEEEISK                        | 14  | 1120  | 0.57 | 0.16 | 28 |
| 22 F20H11.3 | LIDASVPELNK                     | 49  | 4262  | 0.60 | 0.17 | 29 |
| 22 F20H11.3 | QDPLVAHLALYDVVNTPGVAADLSHIDSNAK | 97  | 3783  | 0.60 | 0.34 | 56 |
| 10 F20H11.3 | LTPRIQDAGTEVVNAK                | 23  | 891   | 0.61 | 0.18 | 30 |
| 1 F20H11.3  | LTPRIQDAGTEVVNAK                | 18  | 6201  | 0.61 | 0.16 | 26 |
| 22 F20H11.3 | LTPRIQDAGTEVVNAK                | 21  | 38934 | 0.64 | 0.15 | 23 |
| 1 F20H11.3  | LTPRIQDAGTEVVNAK                | 21  | 1335  | 0.65 | 0.11 | 17 |
| 22 F20H11.3 | LTPRIQDAGTEVVNAK                | 33  | 1312  | 0.65 | 0.09 | 13 |
| 22 F20H11.3 | VALLGAAGGIGQPLGLLLK             | 57  | 2509  | 0.65 | 0.18 | 28 |
| 10 F20H11.3 | LTPRIQDAGTEVVNAK                | 28  | 43327 | 0.66 | 0.08 | 12 |
| 7 F20H11.3  | LTPRIQDAGTEVVNAK                | 10  | 24063 | 0.66 | 0.15 | 23 |
| 7 F20H11.3  | LIDASVPELNK                     | 13  | 1164  | 0.66 | 0.15 | 23 |
| 10 F20H11.3 | RVFGVTTLDVVRSQAFVSELK           | 16  | 5682  | 0.67 | 0.27 | 40 |
| 7 F20H11.3  | LTPRIQDAGTEVVNAK                | 38  | 2740  | 0.67 | 0.20 | 30 |
| 10 F20H11.3 | LTPRIQDAGTEVVNAK                | 34  | 50738 | 0.67 | 0.19 | 28 |
| 10 F20H11.3 | VALLGAAGGIGQPLGLLLK             | 18  | 1379  | 0.69 | 0.16 | 24 |
| 22 F20H11.3 | VALLGAAGGIGQPLGLLLK             | 54  | 2144  | 0.71 | 0.17 | 24 |
| 22 F20H11.3 | VALLGAAGGIGQPLGLLLK             | 122 | 3209  | 0.71 | 0.16 | 22 |
| 22 F20H11.3 | GVEYFSTPVELGPNNGVEK             | 59  | 2846  | 0.71 | 0.08 | 11 |
| 22 F20H11.3 | LTPRIQDAGTEVVNAK                | 26  | 4287  | 0.72 | 0.07 | 10 |
| 22 F20H11.3 | QDPLVAHLALYDVVNTPGVAADLSHIDSNAK | 18  | 2060  | 0.73 | 0.16 | 22 |
| 7 F20H11.3  | LTPRIQDAGTEVVNAK                | 27  | 996   | 0.75 | 0.09 | 12 |
| 22 F20H11.3 | LTPRIQDAGTEVVNAK                | 22  | 1373  | 0.75 | 0.15 | 20 |
| 7 F20H11.3  | FSEEEISK                        | 34  | 1974  | 0.76 | 0.19 | 26 |
| 7 F20H11.3  | LTPRIQDAGTEVVNAK                | 11  | 12822 | 0.76 | 0.08 | 11 |
| 22 F20H11.3 | LTPRIQDAGTEVVNAK                | 39  | 4019  | 0.77 | 0.16 | 21 |
| 10 F20H11.3 | LTPRIQDAGTEVVNAK                | 22  | 1736  | 0.78 | 0.08 | 10 |
| 22 F20H11.3 | LIDASVPELNK                     | 49  | 3939  | 0.79 | 0.14 | 18 |
| 7 F20H11.3  | LIDASVPELNK                     | 20  | 2864  | 0.79 | 0.22 | 28 |
| 10 F20H11.3 | NVQCAYVASDAVK                   | 69  | 6344  | 0.79 | 0.08 | 10 |
| 10 F20H11.3 | LTPRIQDAGTEVVNAK                | 30  | 2305  | 0.81 | 0.31 | 39 |
| 22 F20H11.3 | VALLGAAGGIGQPLGLLLK             | 85  | 2450  | 0.81 | 0.17 | 21 |
| 10 F20H11.3 | LTPRIQDAGTEVVNAK                | 40  | 27123 | 0.82 | 0.12 | 14 |
| 7 F20H11.3  | GVEYFSTPVELGPNNGVEK             | 64  | 2400  | 0.82 | 0.10 | 13 |
| 10 F20H11.3 | LTPRIQDAGTEVVNAK                | 40  | 5506  | 0.82 | 0.11 | 14 |
| 1 F20H11.3  | LTPRIQDAGTEVVNAK                | 20  | 1160  | 0.83 | 0.16 | 19 |
| 7 F20H11.3  | GVEYFSTPVELGPNNGVEK             | 12  | 1620  | 0.83 | 0.11 | 13 |
| 22 F20H11.3 | LTPRIQDAGTEVVNAK                | 34  | 1487  | 0.83 | 0.14 | 16 |
| 7 F20H11.3  | FSEEEISK                        | 24  | 1305  | 0.83 | 0.46 | 56 |
| 10 F20H11.3 | LTPRIQDAGTEVVNAK                | 29  | 2793  | 0.86 | 0.14 | 16 |
| 10 F20H11.3 | LTPRIQDAGTEVVNAK                | 33  | 3920  | 0.87 | 0.12 | 14 |
| 10 F20H11.3 | VALLGAAGGIGQPLGLLLK             | 74  | 3330  | 0.87 | 0.13 | 15 |
| 10 F20H11.3 | LTPRIQDAGTEVVNAK                | 31  | 3946  | 0.87 | 0.13 | 15 |
| 1 F20H11.3  | LTPRIQDAGTEVVNAK                | 14  | 2117  | 0.88 | 0.30 | 34 |
| 10 F20H11.3 | NVQCAYVASDAVK                   | 67  | 5041  | 0.88 | 0.10 | 12 |
| 22 F20H11.3 | VALLGAAGGIGQPLGLLLK             | 33  | 1849  | 0.89 | 0.06 | 6  |
| 7 F20H11.3  | LTPRIQDAGTEVVNAK                | 27  | 895   | 0.91 | 0.26 | 29 |
| 22 F20H11.3 | LTPRIQDAGTEVVNAK                | 37  | 1252  | 0.91 | 0.12 | 13 |
| 22 F20H11.3 | QDPLVAHLALYDVVNTPGVAADLSHIDSNAK | 20  | 1130  | 0.92 | 0.15 | 16 |
| 7 F20H11.3  | LTPRIQDAGTEVVNAK                | 22  | 2676  | 0.92 | 0.12 | 13 |
| 7 F20H11.3  | GVEYFSTPVELGPNNGVEK             | 65  | 2262  | 0.93 | 0.10 | 11 |
| 22 F20H11.3 | LTPRIQDAGTEVVNAK                | 35  | 2177  | 0.95 | 0.18 | 19 |
| 7 F20H11.3  | GVEYFSTPVELGPNNGVEK             | 19  | 2015  | 0.96 | 0.09 | 9  |
| 22 F20H11.3 | RVFGVTTLDVVRSQAFVSELK           | 26  | 4869  | 0.97 | 0.16 | 17 |
| 1 F20H11.3  | LTPRIQDAGTEVVNAK                | 17  | 2604  | 0.98 | 0.17 | 17 |
| 1 F20H11.3  | GVEYFSTPVELGPNNGVEK             | 63  | 1597  | 0.99 | 0.14 | 14 |
| 10 F20H11.3 | LTPRIQDAGTEVVNAK                | 32  | 18324 | 1.00 | 0.17 | 17 |
| 22 F20H11.3 | FSEEEISK                        | 30  | 1628  | 1.00 | 0.39 | 39 |
| 10 F20H11.3 | VALLGAAGGIGQPLGLLLK             | 118 | 3457  | 1.01 | 0.16 | 16 |
| 7 F20H11.3  | LTPRIQDAGTEVVNAK                | 31  | 2822  | 1.01 | 0.13 | 13 |
| 22 F20H11.3 | RVFGVTTLDVVRSQAFVSELK           | 11  | 15725 | 1.04 | 0.09 | 8  |
| 10 F20H11.3 | RVFGVTTLDVVRSQAFVSELK           | 11  | 6889  | 1.07 | 0.07 | 7  |
| 7 F20H11.3  | NVQCAYVASDAVK                   | 70  | 3362  | 1.07 | 0.13 | 12 |
| 22 F20H11.3 | LTPRIQDAGTEVVNAK                | 22  | 45188 | 1.09 | 0.25 | 23 |
| 1 F20H11.3  | LTPRIQDAGTEVVNAK                | 15  | 1199  | 1.09 | 0.14 | 13 |
| 22 F20H11.3 | GVEYFSTPVELGPNNGVEK             | 65  | 3201  | 1.10 | 0.18 | 16 |

|             |                           |     |       |       |      |     |
|-------------|---------------------------|-----|-------|-------|------|-----|
| 10 F20H11.3 | NVQCAYVASDAVK             | 38  | 2669  | 1.10  | 0.14 | 13  |
| 22 F20H11.3 | NVQCAYVASDAVK             | 87  | 5582  | 1.10  | 0.12 | 11  |
| 22 F20H11.3 | GVEYFSTPVELGPNNGVEK       | 94  | 3417  | 1.11  | 0.15 | 14  |
| 22 F20H11.3 | NVQCAYVASDAVK             | 79  | 6045  | 1.12  | 0.09 | 8   |
| 22 F20H11.3 | LTPRIQDAGTEVVNAK          | 44  | 10625 | 1.12  | 0.14 | 12  |
| 7 F20H11.3  | NVQCAYVASDAVK             | 42  | 2906  | 1.14  | 0.10 | 9   |
| 1 F20H11.3  | LTPRIQDAGTEVVNAK          | 18  | 645   | 1.15  | 0.19 | 16  |
| 22 F20H11.3 | LTPRIQDAGTEVVNAK          | 18  | 4157  | 1.18  | 0.07 | 6   |
| 10 F20H11.3 | LTPRIQDAGTEVVNAK          | 31  | 2284  | 1.21  | 0.52 | 43  |
| 22 F20H11.3 | GVEYFSTPVELGPNNGVEK       | 69  | 2971  | 1.22  | 0.19 | 16  |
| 10 F20H11.3 | GVEYFSTPVELGPNNGVEK       | 86  | 6138  | 1.24  | 0.12 | 10  |
| 7 F20H11.3  | NVQCAYVASDAVK             | 48  | 2034  | 1.27  | 0.16 | 13  |
| 1 F20H11.3  | GVEYFSTPVELGPNNGVEK       | 49  | 770   | 1.28  | 0.15 | 11  |
| 22 F20H11.3 | RVFGVTTLDVVRSQAFVSELK     | 12  | 2217  | 1.35  | 0.24 | 18  |
| 7 F20H11.3  | NVQCAYVASDAVK             | 78  | 3325  | 1.36  | 0.10 | 7   |
| 22 F20H11.3 | LIDASVPELNK               | 17  | 1532  | 1.36  | 0.16 | 12  |
| 1 F20H11.3  | LIDASVPELNK               | 21  | 1289  | 1.37  | 0.11 | 8   |
| 10 F20H11.3 | NVQCAYVASDAVK             | 31  | 2323  | 1.38  | 0.15 | 11  |
| 22 F20H11.3 | LTPRIQDAGTEVVNAK          | 13  | 4523  | 1.40  | 0.28 | 20  |
| 10 F20H11.3 | GVEYFSTPVELGPNNGVEK       | 52  | 2111  | 1.43  | 0.18 | 12  |
| 1 F20H11.3  | NVQCAYVASDAVK             | 25  | 1154  | 1.44  | 0.20 | 14  |
| 10 F20H11.3 | GVEYFSTPVELGPNNGVEK       | 75  | 4501  | 1.45  | 0.12 | 8   |
| 1 F20H11.3  | LTPRIQDAGTEVVNAK          | 43  | 3230  | 1.53  | 0.20 | 13  |
| 1 F20H11.3  | NVQCAYVASDAVK             | 56  | 1060  | 1.61  | 0.14 | 9   |
| 22 F20H11.3 | LIDASVPELNK               | 10  | 1132  | 1.64  | 0.14 | 8   |
| 22 F20H11.3 | NVQCAYVASDAVK             | 42  | 1868  | 1.69  | 0.09 | 6   |
| 22 F20H11.3 | NVQCAYVASDAVK             | 48  | 2521  | 1.86  | 0.16 | 9   |
| 1 F20H11.3  | NVQCAYVASDAVK             | 22  | 1773  | 1.97  | 0.26 | 13  |
| 22 F20H11.3 | VALLGAAGGIGQPLGLLLK       | 37  | 941   | 2.24  | 0.08 | 4   |
| 1 F20H11.3  | LTPRIQDAGTEVVNAK          | 16  | 561   | 2.40  | 0.19 | 8   |
| 22 F20H11.3 | VALLGAAGGIGQPLGLLLK       | 102 | 2397  | 2.63  | 0.11 | 4   |
| 22 F20H11.3 | VALLGAAGGIGQPLGLLLK       | 61  | 2315  | 3.06  | 0.26 | 8   |
| 1 F20H11.3  | VALLGAAGGIGQPLGLLLK       | 97  | 3301  | 24.91 | 0.58 | 2   |
| 7 F21D5.1   | LYRDVPPNVQIK              | 23  | 2014  | 0.87  | 0.20 | 22  |
| 10 F21D5.1  | VPVIDRSIFK                | 12  | 3261  | 1.14  | 0.06 | 5   |
| 10 F21D5.1  | LGIEPIIVPTGVK             | 13  | 1269  | 1.24  | 0.16 | 13  |
| 10 F21F8.3  | YQVISDTGTSFLGGPK          | 104 | 1376  | 0.39  | 0.14 | 36  |
| 10 F21F8.3  | YQVISDTGTSFLGGPK          | 95  | 1784  | 0.42  | 0.10 | 24  |
| 10 F21F8.3  | YQVISDTGTSFLGGPK          | 85  | 1427  | 0.45  | 0.19 | 42  |
| 7 F21F8.3   | GYLGEDTVAFGAVTEK          | 98  | 3093  | 0.48  | 0.20 | 40  |
| 22 F21F8.3  | YQVISDTGTSFLGGPK          | 79  | 2155  | 0.49  | 0.19 | 39  |
| 22 F21F8.3  | YQVISDTGTSFLGGPK          | 82  | 2836  | 0.52  | 0.16 | 31  |
| 7 F21F8.3   | YQVISDTGTSFLGGPK          | 83  | 1184  | 0.53  | 0.22 | 42  |
| 10 F21F8.3  | YQVISDTGTSFLGGPK          | 55  | 636   | 0.55  | 0.17 | 31  |
| 22 F21F8.3  | GYLGEDTVAFGAVTEK          | 98  | 5409  | 0.58  | 0.07 | 12  |
| 7 F21F8.3   | YQVISDTGTSFLGGPK          | 103 | 1786  | 0.72  | 0.17 | 24  |
| 10 F21F8.3  | YQVISDTGTSFLGGPK          | 96  | 1767  | 0.80  | 0.21 | 27  |
| 10 F21F8.3  | GYLGEDTVAFGAVTEK          | 90  | 3589  | 0.84  | 0.11 | 14  |
| 10 F21F8.3  | YQVISDTGTSFLGGPK          | 89  | 1848  | 0.85  | 0.16 | 18  |
| 10 F21F8.3  | GYLGEDTVAFGAVTEK          | 78  | 3837  | 0.91  | 0.06 | 7   |
| 22 F21F8.3  | YQVISDTGTSFLGGPK          | 47  | 650   | 0.94  | 0.12 | 12  |
| 1 F21F8.3   | GYLGEDTVAFGAVTEK          | 53  | 1447  | 0.96  | 0.13 | 13  |
| 22 F21F8.3  | GYLGEDTVAFGAVTEK          | 69  | 2130  | 0.98  | 0.25 | 26  |
| 1 F21F8.3   | GYLGEDTVAFGAVTEK          | 76  | 1157  | 1.02  | 0.18 | 18  |
| 1 F21F8.3   | GYLGEDTVAFGAVTEK          | 68  | 1200  | 1.03  | 0.20 | 19  |
| 7 F21F8.3   | GYLGEDTVAFGAVTEK          | 74  | 1920  | 1.04  | 0.05 | 5   |
| 1 F21F8.3   | GYLGEDTVAFGAVTEK          | 85  | 2068  | 1.06  | 0.10 | 9   |
| 7 F21F8.3   | GYLGEDTVAFGAVTEK          | 52  | 1466  | 1.09  | 0.13 | 12  |
| 1 F21F8.3   | GYLGEDTVAFGAVTEK          | 78  | 1251  | 1.10  | 0.14 | 13  |
| 7 F21F8.3   | GYLGEDTVAFGAVTEK          | 76  | 1630  | 1.13  | 0.23 | 20  |
| 22 F21F8.3  | GYLGEDTVAFGAVTEK          | 100 | 2627  | 1.15  | 0.12 | 11  |
| 10 F21F8.3  | YQVISDTGTSFLGGPK          | 97  | 3219  | 1.39  | 0.11 | 8   |
| 7 F21F8.3   | GYLGEDTVAFGAVTEK          | 81  | 3435  | 1.42  | 0.10 | 7   |
| 7 F21F8.3   | GYLGEDTVAFGAVTEK          | 52  | 1758  | 1.42  | 0.16 | 11  |
| 22 F21F8.3  | GYLGEDTVAFGAVTEK          | 127 | 7152  | 1.49  | 0.08 | 5   |
| 1 F21F8.3   | YQVISDTGTSFLGGPK          | 87  | 1144  | 1.55  | 0.20 | 13  |
| 7 F21F8.3   | GYLGEDTVAFGAVTEK          | 53  | 2907  | 1.59  | 0.20 | 13  |
| 22 F21F8.3  | GYLGEDTVAFGAVTEK          | 101 | 5164  | 1.60  | 0.13 | 8   |
| 10 F21F8.3  | GYLGEDTVAFGAVTEK          | 115 | 5630  | 1.77  | 0.14 | 8   |
| 10 F21F8.3  | YQVISDTGTSFLGGPK          | 107 | 1661  | 2.17  | 0.15 | 7   |
| 22 F21F8.3  | YQVISDTGTSFLGGPK          | 69  | 1584  | 2.23  | 0.11 | 5   |
| 1 F21F8.3   | GYLGEDTVAFGAVTEK          | 100 | 5714  | 2.54  | 0.18 | 7   |
| 22 F21F8.3  | YQVISDTGTSFLGGPK          | 107 | 2512  | 2.57  | 0.16 | 6   |
| 1 F21F8.3   | GYLGEDTVAFGAVTEK          | 75  | 2420  | 2.80  | 0.16 | 6   |
| 1 F21F8.3   | GYLGEDTVAFGAVTEK          | 36  | 242   | 5.21  | 0.17 | 3   |
| 7 F21F8.7   | GDSQLSVPTTTFGIASK         | 58  | 4314  | 0.19  | 0.26 | 139 |
| 7 F21F8.7   | GDSQLSVPTTTFGIASK         | 46  | 4446  | 0.37  | 0.33 | 88  |
| 7 F21F8.7   | GDSQLSVPTTTFGIASK         | 45  | 3355  | 0.37  | 0.45 | 121 |
| 1 F21F8.7   | GDSQLSVPTTTFGIASK         | 17  | 1008  | 0.42  | 0.20 | 47  |
| 10 F21F8.7  | GDSQLSVPTTTFGIASK         | 65  | 3594  | 0.44  | 0.07 | 16  |
| 10 F21F8.7  | GDSQLSVPTTTFGIASK         | 36  | 2479  | 0.59  | 0.19 | 33  |
| 22 F21F8.7  | GDSQLSVPTTTFGIASK         | 53  | 2949  | 0.63  | 0.27 | 42  |
| 7 F21F8.7   | RMGFAPSLQK                | 15  | 4215  | 0.64  | 0.31 | 49  |
| 1 F21F8.7   | GDSQLSVPTTTFGIASK         | 17  | 896   | 0.64  | 0.19 | 30  |
| 22 F21F8.7  | GDSQLSVPTTTFGIASK         | 25  | 1704  | 0.64  | 0.10 | 16  |
| 1 F21F8.7   | GDSQLSVPTTTFGIASK         | 25  | 1696  | 0.67  | 0.16 | 24  |
| 10 F21F8.7  | GDSQLSVPTTTFGIASK         | 17  | 2495  | 0.67  | 0.16 | 24  |
| 10 F21F8.7  | GDSQLSVPTTTFGIASK         | 19  | 1958  | 0.68  | 0.13 | 18  |
| 10 F21F8.7  | GDSQLSVPTTTFGIASK         | 20  | 1624  | 0.69  | 0.29 | 42  |
| 1 F21F8.7   | GDSQLSVPTTTFGIASK         | 30  | 2822  | 0.72  | 0.13 | 18  |
| 22 F21F8.7  | GDSQLSVPTTTFGIASK         | 39  | 3588  | 0.74  | 0.17 | 23  |
| 10 F21F8.7  | GDSQLSVPTTTFGIASK         | 17  | 1973  | 0.80  | 0.15 | 19  |
| 10 F21F8.7  | GDSQLSVPTTTFGIASK         | 32  | 3932  | 0.81  | 0.14 | 18  |
| 10 F21F8.7  | GDSQLSVPTTTFGIASK         | 26  | 5219  | 0.82  | 0.23 | 28  |
| 7 F21F8.7   | GDSQLSVPTTTFGIASK         | 35  | 2049  | 0.84  | 0.12 | 15  |
| 7 F21F8.7   | GDSQLSVPTTTFGIASK         | 37  | 2903  | 0.88  | 0.36 | 41  |
| 22 F21F8.7  | GDSQLSVPTTTFGIASK         | 22  | 3562  | 0.89  | 0.12 | 13  |
| 7 F21F8.7   | GDSQLSVPTTTFGIASK         | 23  | 6482  | 0.92  | 0.14 | 15  |
| 22 F21F8.7  | GDSQLSVPTTTFGIASK         | 60  | 5104  | 0.94  | 0.22 | 23  |
| 7 F21F8.7   | TVDVISDTGTSFLGGPQSVVDGLAK | 57  | 2559  | 0.95  | 0.16 | 17  |
| 1 F21F8.7   | GDSQLSVPTTTFGIASK         | 20  | 1634  | 1.03  | 0.14 | 14  |

|             |                           |    |       |      |      |    |
|-------------|---------------------------|----|-------|------|------|----|
| 10 F21F8.7  | GDSQLSVPTTTFGIASK         | 12 | 1407  | 1.04 | 0.26 | 25 |
| 22 F21F8.7  | GDSQLSVPTTTFGIASK         | 23 | 5247  | 1.04 | 0.04 | 4  |
| 7 F21F8.7   | GDSQLSVPTTTFGIASK         | 40 | 3700  | 1.12 | 0.11 | 10 |
| 7 F21F8.7   | GDSQLSVPTTTFGIASK         | 36 | 1554  | 1.15 | 0.11 | 9  |
| 7 F21F8.7   | GDSQLSVPTTTFGIASK         | 11 | 4919  | 1.16 | 0.12 | 11 |
| 7 F21F8.7   | TVDVISDTGTSFLGGPQSVVDGLAK | 43 | 2290  | 1.19 | 0.20 | 17 |
| 22 F21F8.7  | GDSQLSVPTTTFGIASK         | 18 | 1483  | 1.19 | 0.09 | 8  |
| 7 F21F8.7   | GDSQLSVPTTTFGIASK         | 27 | 7605  | 1.20 | 0.13 | 11 |
| 7 F21F8.7   | GDSQLSVPTTTFGIASK         | 41 | 2872  | 1.21 | 0.12 | 10 |
| 22 F21F8.7  | GDSQLSVPTTTFGIASK         | 13 | 2064  | 1.22 | 0.13 | 11 |
| 7 F21F8.7   | GDSQLSVPTTTFGIASK         | 21 | 2579  | 1.23 | 0.14 | 12 |
| 22 F21F8.7  | GDSQLSVPTTTFGIASK         | 30 | 5946  | 1.26 | 0.23 | 18 |
| 10 F21F8.7  | GDSQLSVPTTTFGIASK         | 42 | 2726  | 1.58 | 0.11 | 7  |
| 22 F21F8.7  | GDSQLSVPTTTFGIASK         | 32 | 1404  | 1.82 | 0.22 | 12 |
| 10 F21F8.7  | RMGFAPSLQK                | 20 | 4339  | 2.15 | 0.13 | 6  |
| 22 F21F8.7  | GDSQLSVPTTTFGIASK         | 20 | 1826  | 2.27 | 0.13 | 6  |
| 10 F21F8.7  | GDSQLSVPTTTFGIASK         | 39 | 4100  | 2.28 | 0.15 | 6  |
| 22 F21F8.7  | GDSQLSVPTTTFGIASK         | 42 | 3681  | 2.45 | 0.15 | 6  |
| 10 F21F8.7  | GDSQLSVPTTTFGIASK         | 44 | 2374  | 2.73 | 0.17 | 6  |
| 22 F21F8.7  | RMGFAPSLQK                | 17 | 4847  | 3.01 | 0.14 | 5  |
| 10 F21F8.7  | GDSQLSVPTTTFGIASK         | 36 | 2452  | 4.07 | 0.15 | 4  |
| 22 F21F8.7  | RMGFAPSLQK                | 10 | 1041  | 4.09 | 0.09 | 2  |
| 10 F21F8.7  | RMGFAPSLQK                | 13 | 1930  | 4.99 | 0.09 | 2  |
| 22 F21H12.6 | LLVWLSADDTK               | 59 | 906   | 0.44 | 0.12 | 26 |
| 22 F21H12.6 | ELPLLHVHK                 | 23 | 3076  | 0.54 | 0.16 | 30 |
| 22 F21H12.6 | TIVPTSGSFLAGTFSALK        | 48 | 1089  | 0.59 | 0.30 | 51 |
| 10 F21H12.6 | ELPLLHVHK                 | 16 | 2290  | 0.59 | 0.20 | 34 |
| 22 F21H12.6 | ELPLLHVHK                 | 36 | 7273  | 0.69 | 0.07 | 10 |
| 10 F21H12.6 | ELPLLHVHK                 | 22 | 2523  | 0.72 | 0.22 | 31 |
| 10 F21H12.6 | WLALTGGSEDQRK             | 16 | 2140  | 0.80 | 0.06 | 7  |
| 10 F21H12.6 | DGVIEGISGRK               | 18 | 6080  | 0.82 | 0.19 | 23 |
| 22 F21H12.6 | ELPLLHVHK                 | 14 | 2747  | 0.87 | 0.19 | 22 |
| 22 F21H12.6 | ELPLLHVHK                 | 52 | 6820  | 0.90 | 0.15 | 16 |
| 22 F21H12.6 | VAVDQYTSRLVGK             | 48 | 3654  | 0.99 | 0.19 | 19 |
| 10 F21H12.6 | WLALTGGSEDQRK             | 30 | 2262  | 1.03 | 0.17 | 17 |
| 22 F21H12.6 | LVDQTPENVQK               | 17 | 1467  | 1.10 | 0.36 | 33 |
| 10 F21H12.6 | DGVIEGISGRK               | 18 | 4883  | 1.43 | 0.44 | 31 |
| 1 F22B5.9   | LRQPDALSHAVHIGNPK         | 10 | 6345  | 0.38 | 0.22 | 58 |
| 7 F22B5.9   | LRQPDALSHAVHIGNPK         | 22 | 5611  | 0.45 | 0.21 | 46 |
| 10 F22B5.9  | LRQPDALSHAVHIGNPK         | 23 | 5520  | 0.57 | 0.40 | 70 |
| 10 F22B5.9  | LFELQDVIVK                | 11 | 796   | 0.59 | 0.22 | 37 |
| 22 F22B5.9  | LPESNTVAVAFPINK           | 13 | 1212  | 0.63 | 0.07 | 11 |
| 10 F22B5.9  | LRQPDALSHAVHIGNPK         | 12 | 11781 | 0.67 | 0.18 | 27 |
| 10 F22B5.9  | LFELQDVIVK                | 38 | 2022  | 0.87 | 0.08 | 9  |
| 10 F22B5.9  | LFELQDVIVK                | 45 | 1821  | 0.99 | 0.09 | 9  |
| 22 F22B5.9  | LPESNTVAVAFPINK           | 13 | 693   | 1.08 | 0.12 | 11 |
| 7 F22B5.9   | LRQPDALSHAVHIGNPK         | 20 | 6876  | 1.22 | 0.17 | 14 |
| 10 F22B5.9  | LFELQDVIVK                | 29 | 1626  | 1.25 | 0.15 | 12 |
| 7 F22B5.9   | LRQPDALSHAVHIGNPK         | 16 | 16147 | 1.37 | 0.36 | 26 |
| 10 F22B5.9  | TLSSNRDMPLPK              | 34 | 2648  | 1.39 | 0.20 | 14 |
| 10 F22B5.9  | LRQPDALSHAVHIGNPK         | 10 | 14051 | 1.57 | 0.26 | 17 |
| 22 F22B5.9  | LFELQDVIVK                | 35 | 1232  | 1.58 | 0.12 | 8  |
| 22 F22B5.9  | LFELQDVIVK                | 17 | 723   | 2.15 | 0.13 | 6  |
| 10 F22B5.9  | TLEFQVARTSLLPGLLK         | 20 | 879   | 3.91 | 0.08 | 2  |
| 7 F22D6.3a  | SLIEFVNPGYK               | 20 | 976   | 0.37 | 0.15 | 40 |
| 22 F22D6.3a | SLIEFVNPGYK               | 39 | 2643  | 0.53 | 0.15 | 29 |
| 7 F22D6.3a  | SLIEFVNPGYK               | 35 | 2252  | 0.58 | 0.20 | 35 |
| 7 F22D6.3a  | SLIEFVNPGYK               | 36 | 1968  | 0.67 | 0.09 | 14 |
| 7 F22D6.3a  | EAIEWLQK                  | 26 | 1832  | 0.67 | 0.13 | 19 |
| 1 F22D6.3a  | SLIEFVNPGYK               | 38 | 3104  | 0.69 | 0.10 | 14 |
| 1 F22D6.3a  | SLIEFVNPGYK               | 16 | 1109  | 0.72 | 0.17 | 24 |
| 1 F22D6.3a  | SLIEFVNPGYK               | 18 | 1346  | 0.80 | 0.35 | 44 |
| 10 F22D6.3a | SLIEFVNPGYK               | 50 | 2697  | 0.80 | 0.15 | 18 |
| 7 F22D6.3a  | SLIEFVNPGYK               | 18 | 1065  | 0.89 | 0.08 | 8  |
| 10 F22D6.3a | EAIEWLQK                  | 37 | 2749  | 1.00 | 0.12 | 12 |
| 7 F22D6.3a  | SLIEFVNPGYK               | 12 | 1125  | 1.01 | 0.15 | 15 |
| 22 F22D6.3a | SLIEFVNPGYK               | 43 | 3592  | 1.05 | 0.09 | 8  |
| 1 F22D6.3a  | SLIEFVNPGYK               | 30 | 1442  | 1.06 | 0.13 | 12 |
| 22 F22D6.3a | SLIEFVNPGYK               | 39 | 2715  | 1.18 | 0.18 | 15 |
| 7 F22D6.3a  | EAIEWLQK                  | 12 | 583   | 1.20 | 0.18 | 15 |
| 10 F22D6.3a | SLIEFVNPGYK               | 61 | 4663  | 1.22 | 0.19 | 16 |
| 10 F22D6.3a | SLIEFVNPGYK               | 48 | 3309  | 1.24 | 0.08 | 6  |
| 10 F22G12.4 | TPLHLAAIAK                | 21 | 1556  | 1.88 | 0.14 | 8  |
| 1 F23B12.5  | ISINDFIK                  | 19 | 606   | 0.40 | 0.17 | 41 |
| 10 F23B12.5 | ISINDFIK                  | 62 | 5881  | 0.44 | 0.14 | 31 |
| 7 F23B12.5  | ISINDFIK                  | 37 | 1735  | 0.45 | 0.31 | 70 |
| 1 F23B12.5  | ISINDFIK                  | 14 | 609   | 0.50 | 0.17 | 33 |
| 10 F23B12.5 | SAPIPHSSSGRVSASPF         | 12 | 4794  | 0.74 | 0.08 | 10 |
| 1 F23B12.5  | ISINDFIK                  | 10 | 584   | 0.77 | 0.15 | 19 |
| 22 F23B12.5 | SAPIPHSSSGRVSASPF         | 15 | 9199  | 0.89 | 0.12 | 13 |
| 10 F23B12.5 | ISINDFIK                  | 33 | 2852  | 0.95 | 0.12 | 13 |
| 22 F23B12.5 | SAPIPHSSSGRVSASPF         | 17 | 44877 | 0.99 | 0.09 | 9  |
| 10 F23B12.5 | LNGLLAK                   | 40 | 2224  | 1.00 | 0.10 | 10 |
| 22 F23B12.5 | LNGLLAK                   | 28 | 2056  | 1.02 | 0.14 | 14 |
| 10 F23B12.5 | ISINDFIK                  | 18 | 888   | 1.06 | 0.30 | 29 |
| 10 F23B12.5 | LNGLLAK                   | 15 | 1746  | 1.23 | 0.11 | 9  |
| 10 F23B12.5 | LNGLLAK                   | 46 | 2089  | 1.38 | 0.14 | 10 |
| 10 F23B12.5 | SAPIPHSSSGRVSASPF         | 11 | 69991 | 1.55 | 0.25 | 16 |
| 10 F23B12.5 | SAPIPHSSSGRVSASPF         | 14 | 8947  | 1.56 | 0.11 | 7  |
| 1 F23B12.5  | SAPIPHSSSGRVSASPF         | 11 | 27850 | 1.63 | 0.11 | 7  |
| 10 F23B12.5 | SAPIPHSSSGRVSASPF         | 13 | 9934  | 1.90 | 0.23 | 12 |
| 1 F23B12.5  | GATSTTTQAVSGQDYTDIPLSNMRK | 24 | 2250  | 1.94 | 0.17 | 9  |
| 7 F23C8.5   | LATEVVAFSLGGPK            | 41 | 972   | 0.27 | 0.20 | 76 |
| 22 F23C8.5  | FDAVFLGK                  | 34 | 3590  | 0.28 | 0.14 | 50 |
| 22 F23C8.5  | AVHVQVTDAAEAGK            | 49 | 7567  | 0.29 | 0.18 | 60 |
| 1 F23C8.5   | LESFHVAK                  | 39 | 12701 | 0.37 | 0.12 | 32 |
| 7 F23C8.5   | LATEVVAFSLGGPK            | 66 | 2155  | 0.38 | 0.18 | 48 |
| 1 F23C8.5   | FDAVFLGK                  | 29 | 2049  | 0.38 | 0.23 | 61 |
| 10 F23C8.5  | LESFHVAK                  | 41 | 14601 | 0.38 | 0.16 | 42 |
| 10 F23C8.5  | LESFHVAK                  | 41 | 25067 | 0.39 | 0.09 | 24 |
| 1 F23C8.5   | LESFHVAK                  | 40 | 13284 | 0.41 | 0.12 | 30 |

|            |                |     |       |      |      |     |
|------------|----------------|-----|-------|------|------|-----|
| 7 F23C8.5  | SAEVLRTALAK    | 21  | 1025  | 0.43 | 0.13 | 30  |
| 22 F23C8.5 | FDAVFLGK       | 38  | 2621  | 0.44 | 0.12 | 28  |
| 22 F23C8.5 | LESFHVAK       | 42  | 28955 | 0.45 | 0.14 | 32  |
| 22 F23C8.5 | VTREIDGGLDTIK  | 27  | 1759  | 0.45 | 0.58 | 129 |
| 7 F23C8.5  | VTREIDGGLDTIK  | 29  | 3700  | 0.45 | 0.20 | 44  |
| 10 F23C8.5 | LESFHVAK       | 45  | 6716  | 0.46 | 0.13 | 28  |
| 22 F23C8.5 | VEDAGAGHMK     | 50  | 5484  | 0.46 | 0.13 | 28  |
| 7 F23C8.5  | RVVDYAVK       | 34  | 8085  | 0.47 | 0.14 | 30  |
| 7 F23C8.5  | VTREIDGGLDTIK  | 20  | 3818  | 0.48 | 0.18 | 38  |
| 7 F23C8.5  | RVVDYAVK       | 25  | 12061 | 0.48 | 0.09 | 19  |
| 22 F23C8.5 | VTREIDGGLDTIK  | 12  | 2435  | 0.48 | 0.20 | 40  |
| 10 F23C8.5 | LESFHVAK       | 43  | 22537 | 0.50 | 0.19 | 38  |
| 10 F23C8.5 | FDAVFLGK       | 30  | 1607  | 0.50 | 0.14 | 29  |
| 1 F23C8.5  | VTREIDGGLDTIK  | 22  | 1077  | 0.52 | 0.02 | 4   |
| 10 F23C8.5 | LATEVVAFSLGGPK | 62  | 1758  | 0.52 | 0.11 | 22  |
| 7 F23C8.5  | LESFHVAK       | 30  | 2142  | 0.52 | 0.13 | 25  |
| 10 F23C8.5 | AVHVQVTDAEAGK  | 84  | 15217 | 0.52 | 0.07 | 13  |
| 22 F23C8.5 | LESFHVAK       | 41  | 1250  | 0.52 | 0.24 | 46  |
| 1 F23C8.5  | LESFHVAK       | 43  | 2858  | 0.55 | 0.09 | 17  |
| 22 F23C8.5 | VEDAGAGHMK     | 50  | 6513  | 0.55 | 0.21 | 37  |
| 1 F23C8.5  | FDAVFLGK       | 45  | 2493  | 0.56 | 0.19 | 34  |
| 22 F23C8.5 | LESFHVAK       | 43  | 29916 | 0.56 | 0.16 | 29  |
| 10 F23C8.5 | LESFHVAK       | 37  | 14043 | 0.56 | 0.20 | 36  |
| 10 F23C8.5 | FDAVFLGK       | 19  | 1504  | 0.56 | 0.12 | 21  |
| 22 F23C8.5 | AVHVQVTDAEAGK  | 49  | 5135  | 0.58 | 0.25 | 43  |
| 22 F23C8.5 | SAEVLRTALAK    | 15  | 2415  | 0.58 | 0.30 | 51  |
| 1 F23C8.5  | FDAVFLGK       | 46  | 1347  | 0.58 | 0.21 | 36  |
| 10 F23C8.5 | AVHVQVTDAEAGK  | 69  | 12124 | 0.60 | 0.43 | 72  |
| 10 F23C8.5 | LATEVVAFSLGGPK | 54  | 1375  | 0.61 | 0.22 | 37  |
| 7 F23C8.5  | LATEVVAFSLGGPK | 73  | 1441  | 0.61 | 0.19 | 30  |
| 1 F23C8.5  | LESFHVAK       | 50  | 3373  | 0.61 | 0.08 | 13  |
| 10 F23C8.5 | FDAVFLGK       | 29  | 1894  | 0.66 | 0.15 | 23  |
| 10 F23C8.5 | LATEVVAFSLGGPK | 94  | 5064  | 0.68 | 0.13 | 20  |
| 10 F23C8.5 | AVHVQVTDAEAGK  | 73  | 29251 | 0.71 | 0.30 | 42  |
| 10 F23C8.5 | AVHVQVTDAEAGK  | 43  | 18435 | 0.71 | 0.11 | 16  |
| 1 F23C8.5  | AVHVQVTDAEAGK  | 54  | 11217 | 0.71 | 0.09 | 12  |
| 10 F23C8.5 | SAEVLRTALAK    | 18  | 3387  | 0.72 | 0.16 | 22  |
| 1 F23C8.5  | SAEVLRTALAK    | 24  | 1017  | 0.72 | 0.17 | 23  |
| 22 F23C8.5 | RVVDYAVK       | 43  | 6888  | 0.74 | 0.11 | 14  |
| 22 F23C8.5 | FDAVFLGK       | 12  | 922   | 0.77 | 0.25 | 33  |
| 7 F23C8.5  | LESFHVAK       | 19  | 1135  | 0.77 | 0.10 | 13  |
| 10 F23C8.5 | RVVDYAVK       | 16  | 8414  | 0.77 | 0.12 | 15  |
| 22 F23C8.5 | LESFHVAK       | 52  | 2575  | 0.78 | 0.17 | 22  |
| 7 F23C8.5  | LATEVVAFSLGGPK | 83  | 1707  | 0.78 | 0.22 | 28  |
| 7 F23C8.5  | FDAVFLGK       | 21  | 3274  | 0.78 | 0.35 | 45  |
| 10 F23C8.5 | SAEVLRTALAK    | 25  | 4580  | 0.81 | 0.07 | 8   |
| 1 F23C8.5  | AVHVQVTDAEAGK  | 62  | 11958 | 0.82 | 0.27 | 33  |
| 22 F23C8.5 | LATEVVAFSLGGPK | 84  | 3328  | 0.82 | 0.12 | 15  |
| 1 F23C8.5  | LATEVVAFSLGGPK | 61  | 1016  | 0.82 | 0.19 | 23  |
| 22 F23C8.5 | LATEVVAFSLGGPK | 74  | 2615  | 0.82 | 0.05 | 6   |
| 10 F23C8.5 | LATEVVAFSLGGPK | 76  | 2570  | 0.83 | 0.08 | 9   |
| 7 F23C8.5  | SAEVLRTALAK    | 17  | 2553  | 0.83 | 0.12 | 15  |
| 1 F23C8.5  | LATEVVAFSLGGPK | 70  | 790   | 0.83 | 0.12 | 14  |
| 22 F23C8.5 | FDAVFLGK       | 18  | 1124  | 0.84 | 0.24 | 28  |
| 22 F23C8.5 | VTREIDGGLDTIK  | 26  | 5807  | 0.84 | 0.15 | 17  |
| 1 F23C8.5  | LESFHVAK       | 44  | 2091  | 0.85 | 0.16 | 20  |
| 10 F23C8.5 | LATEVVAFSLGGPK | 100 | 4014  | 0.85 | 0.07 | 9   |
| 22 F23C8.5 | LATEVVAFSLGGPK | 86  | 2162  | 0.87 | 0.12 | 14  |
| 7 F23C8.5  | VTREIDGGLDTIK  | 51  | 5380  | 0.88 | 0.08 | 10  |
| 22 F23C8.5 | AVHVQVTDAEAGK  | 56  | 18755 | 0.89 | 0.34 | 38  |
| 22 F23C8.5 | RVVDYAVK       | 40  | 5511  | 0.91 | 0.09 | 10  |
| 22 F23C8.5 | SAEVLRTALAK    | 31  | 5009  | 0.91 | 0.17 | 18  |
| 22 F23C8.5 | VTREIDGGLDTIK  | 42  | 4888  | 0.93 | 0.09 | 10  |
| 10 F23C8.5 | VTREIDGGLDTIK  | 39  | 7484  | 0.93 | 0.14 | 15  |
| 10 F23C8.5 | LATEVVAFSLGGPK | 94  | 4589  | 0.94 | 0.07 | 8   |
| 22 F23C8.5 | LESFHVAK       | 38  | 2014  | 0.95 | 0.21 | 23  |
| 1 F23C8.5  | FDAVFLGK       | 42  | 1496  | 0.96 | 0.27 | 28  |
| 1 F23C8.5  | FDAVFLGK       | 42  | 887   | 0.97 | 0.18 | 19  |
| 10 F23C8.5 | VTREIDGGLDTIK  | 16  | 11064 | 0.97 | 0.16 | 17  |
| 22 F23C8.5 | SAEVLRTALAK    | 24  | 1251  | 0.99 | 0.20 | 20  |
| 7 F23C8.5  | VTREIDGGLDTIK  | 35  | 4579  | 0.99 | 0.11 | 11  |
| 1 F23C8.5  | LATEVVAFSLGGPK | 74  | 1774  | 1.06 | 0.14 | 13  |
| 22 F23C8.5 | RVVDYAVK       | 34  | 12009 | 1.08 | 0.13 | 12  |
| 22 F23C8.5 | LATEVVAFSLGGPK | 53  | 1518  | 1.09 | 0.15 | 14  |
| 22 F23C8.5 | SAEVLRTALAK    | 40  | 2144  | 1.10 | 0.12 | 11  |
| 10 F23C8.5 | VTREIDGGLDTIK  | 14  | 5287  | 1.15 | 0.09 | 8   |
| 10 F23C8.5 | FDAVFLGK       | 12  | 1137  | 1.16 | 0.28 | 25  |
| 1 F23C8.5  | VTREIDGGLDTIK  | 16  | 4746  | 1.16 | 0.13 | 11  |
| 1 F23C8.5  | VTREIDGGLDTIK  | 20  | 5474  | 1.16 | 0.12 | 10  |
| 10 F23C8.5 | RVVDYAVK       | 41  | 19774 | 1.17 | 0.19 | 16  |
| 10 F23C8.5 | LESFHVAK       | 55  | 8619  | 1.17 | 0.09 | 8   |
| 1 F23C8.5  | LATEVVAFSLGGPK | 97  | 1923  | 1.18 | 0.25 | 21  |
| 10 F23C8.5 | VTREIDGGLDTIK  | 43  | 13178 | 1.19 | 0.09 | 7   |
| 1 F23C8.5  | VTREIDGGLDTIK  | 15  | 3017  | 1.19 | 0.13 | 11  |
| 10 F23C8.5 | LESFHVAK       | 46  | 4766  | 1.22 | 0.08 | 7   |
| 22 F23C8.5 | RVVDYAVK       | 39  | 21613 | 1.22 | 0.09 | 8   |
| 22 F23C8.5 | AVHVQVTDAEAGK  | 59  | 12349 | 1.23 | 0.40 | 32  |
| 22 F23C8.5 | LESFHVAK       | 52  | 3863  | 1.27 | 0.10 | 8   |
| 7 F23C8.5  | SAEVLRTALAK    | 19  | 1863  | 1.30 | 0.13 | 10  |
| 1 F23C8.5  | FDAVFLGK       | 38  | 1787  | 1.31 | 0.22 | 17  |
| 1 F23C8.5  | RVVDYAVK       | 41  | 7201  | 1.31 | 0.10 | 8   |
| 1 F23C8.5  | LATEVVAFSLGGPK | 93  | 1916  | 1.32 | 0.12 | 9   |
| 22 F23C8.5 | RVVDYAVK       | 44  | 9823  | 1.33 | 0.21 | 15  |
| 22 F23C8.5 | SAEVLRTALAK    | 32  | 3723  | 1.33 | 0.15 | 11  |
| 10 F23C8.5 | VTREIDGGLDTIK  | 26  | 7476  | 1.37 | 0.09 | 6   |
| 22 F23C8.5 | FDAVFLGK       | 50  | 3736  | 1.37 | 0.16 | 11  |
| 22 F23C8.5 | RVVDYAVK       | 43  | 15033 | 1.38 | 0.08 | 6   |
| 1 F23C8.5  | LESFHVAK       | 49  | 1759  | 1.41 | 0.20 | 14  |
| 10 F23C8.5 | RVVDYAVK       | 37  | 45352 | 1.41 | 0.20 | 14  |
| 1 F23C8.5  | RVVDYAVK       | 30  | 27604 | 1.42 | 0.19 | 14  |
| 7 F23C8.5  | AVHVQVTDAEAGK  | 46  | 6183  | 1.42 | 0.42 | 29  |

|                      |                    |     |       |      |      |    |
|----------------------|--------------------|-----|-------|------|------|----|
| 1 F23C8.5            | LESFHVAK           | 34  | 4175  | 1.43 | 0.05 | 3  |
| 7 F23C8.5            | LESFHVAK           | 52  | 2726  | 1.44 | 0.12 | 8  |
| 10 F23C8.5           | LESFHVAK           | 48  | 5445  | 1.45 | 0.11 | 8  |
| 1 F23C8.5            | VTREIDGGDLTIK      | 53  | 6789  | 1.45 | 0.13 | 9  |
| 22 F23C8.5           | LESFHVAK           | 64  | 5927  | 1.50 | 0.13 | 9  |
| 7 F23C8.5            | AVHVQVTDAEAGK      | 49  | 5385  | 1.50 | 0.22 | 14 |
| 7 F23C8.5            | LESFHVAK           | 40  | 2438  | 1.50 | 0.08 | 5  |
| 1 F23C8.5            | SAEVLRTALAK        | 11  | 732   | 1.51 | 0.13 | 8  |
| 1 F23C8.5            | RVVDYAVK           | 21  | 4992  | 1.53 | 0.14 | 9  |
| 1 F23C8.5            | FDAVFLGK           | 45  | 1378  | 1.54 | 0.16 | 10 |
| 1 F23C8.5            | LESFHVAK           | 49  | 4071  | 1.55 | 0.07 | 5  |
| 1 F23C8.5            | VTREIDGGDLTIK      | 40  | 4834  | 1.55 | 0.13 | 8  |
| 7 F23C8.5            | SAEVLRTALAK        | 25  | 2280  | 1.55 | 0.12 | 8  |
| 10 F23C8.5           | LESFHVAK           | 46  | 10281 | 1.58 | 0.07 | 5  |
| 10 F23C8.5           | SAEVLRTALAK        | 34  | 4884  | 1.59 | 0.14 | 9  |
| 22 F23C8.5           | LESFHVAK           | 18  | 2755  | 1.61 | 0.05 | 3  |
| 1 F23C8.5            | RVVDYAVK           | 28  | 20652 | 1.61 | 0.33 | 20 |
| 22 F23C8.5           | FDAVFLGK           | 52  | 2269  | 1.64 | 0.13 | 8  |
| 10 F23C8.5           | RVVDYAVK           | 40  | 35387 | 1.65 | 0.11 | 7  |
| 22 F23C8.5           | SAEVLRTALAK        | 10  | 927   | 1.69 | 0.21 | 12 |
| 10 F23C8.5           | LESFHVAK           | 50  | 4405  | 1.69 | 0.09 | 5  |
| 7 F23C8.5            | RVVDYAVK           | 41  | 13266 | 1.71 | 0.15 | 9  |
| 10 F23C8.5           | SAEVLRTALAK        | 25  | 3831  | 1.73 | 0.12 | 7  |
| 1 F23C8.5            | FDAVFLGK           | 15  | 1222  | 1.75 | 0.14 | 8  |
| 7 F23C8.5            | AVHVQVTDAEAGK      | 53  | 6281  | 1.77 | 0.15 | 8  |
| 7 F23C8.5            | SAEVLRTALAK        | 14  | 2218  | 1.77 | 0.10 | 6  |
| 1 F23C8.5            | VTREIDGGDLTIK      | 17  | 1926  | 1.77 | 0.07 | 4  |
| 10 F23C8.5           | RVVDYAVK           | 39  | 15977 | 1.79 | 0.13 | 7  |
| 10 F23C8.5           | SAEVLRTALAK        | 16  | 6309  | 1.80 | 0.18 | 10 |
| 1 F23C8.5            | SAEVLRTALAK        | 15  | 2314  | 1.85 | 0.13 | 7  |
| 1 F23C8.5            | SAEVLRTALAK        | 15  | 1255  | 1.87 | 0.10 | 5  |
| 10 F23C8.5           | LESFHVAK           | 55  | 7019  | 1.90 | 0.09 | 5  |
| 22 F23C8.5           | SAEVLRTALAK        | 38  | 1123  | 1.91 | 0.17 | 9  |
| 10 F23C8.5           | RVVDYAVK           | 34  | 14863 | 1.92 | 0.15 | 8  |
| 1 F23C8.5            | LATEVVAFSLGGPK     | 101 | 1477  | 1.92 | 0.12 | 6  |
| 22 F23C8.5           | VTREIDGGDLTIK      | 65  | 7197  | 1.95 | 0.07 | 3  |
| 7 F23C8.5            | SAEVLRTALAK        | 14  | 2150  | 1.97 | 0.19 | 9  |
| 1 F23C8.5            | RVVDYAVK           | 23  | 7447  | 1.98 | 0.30 | 15 |
| 10 F23C8.5           | SAEVLRTALAK        | 25  | 3723  | 2.02 | 0.15 | 8  |
| 7 F23C8.5            | AVHVQVTDAEAGK      | 49  | 5804  | 2.03 | 0.35 | 17 |
| 1 F23C8.5            | RVVDYAVK           | 27  | 5751  | 2.11 | 0.26 | 13 |
| 22 F23C8.5           | VTREIDGGDLTIK      | 32  | 3984  | 2.13 | 0.09 | 4  |
| 10 F23C8.5           | SAEVLRTALAK        | 47  | 5631  | 2.19 | 0.13 | 6  |
| 1 F23C8.5            | SAEVLRTALAK        | 34  | 1513  | 2.28 | 0.26 | 11 |
| 22 F23C8.5           | LESFHVAK           | 62  | 4420  | 2.28 | 0.08 | 4  |
| 7 F23C8.5            | LATEVVAFSLGGPK     | 74  | 1858  | 2.29 | 0.13 | 6  |
| 10 F23C8.5           | SAEVLRTALAK        | 18  | 3200  | 2.34 | 0.13 | 6  |
| 1 F23C8.5            | SAEVLRTALAK        | 10  | 1458  | 2.64 | 0.11 | 4  |
| 7 F23C8.5            | LESFHVAK           | 44  | 3689  | 2.65 | 0.09 | 4  |
| 7 F23C8.5            | LATEVVAFSLGGPK     | 74  | 2149  | 2.65 | 0.13 | 5  |
| 7 F23C8.5            | VTREIDGGDLTIK      | 33  | 5384  | 2.90 | 0.11 | 4  |
| 7 F23C8.5            | LESFHVAK           | 55  | 5547  | 2.90 | 0.11 | 4  |
| 22 F23C8.5           | RVVDYAVK           | 31  | 7966  | 3.09 | 0.11 | 4  |
| 7 F23C8.5            | VTREIDGGDLTIK      | 29  | 6387  | 3.12 | 0.05 | 2  |
| 22 F23C8.5           | RVVDYAVK           | 38  | 11052 | 3.20 | 0.11 | 4  |
| 22 F23C8.5           | SAEVLRTALAK        | 28  | 3544  | 3.23 | 0.13 | 4  |
| 7 F23C8.5            | RVVDYAVK           | 37  | 6534  | 3.35 | 0.05 | 2  |
| 7 F23C8.5            | RVVDYAVK           | 30  | 8376  | 3.71 | 0.09 | 2  |
| 7 F23C8.5            | SAEVLRTALAK        | 16  | 1292  | 4.15 | 0.04 | 1  |
| 7 F23C8.5            | SAEVLRTALAK        | 15  | 1153  | 4.78 | 0.12 | 2  |
| 22 F23C8.5           | SAEVLRTALAK        | 18  | 1878  | 5.03 | 0.08 | 2  |
| 22 F23F1.8b          | SLQSVGQIVGEVLK     | 101 | 1771  | 0.86 | 0.30 | 34 |
| 22 F23F1.8b          | SLQSVGQIVGEVLK     | 107 | 2197  | 0.90 | 0.08 | 9  |
| 22 F23F1.8b          | RVGITPPK           | 42  | 6636  | 1.06 | 0.15 | 14 |
| 22 F23F1.8b          | RVGITPPK           | 35  | 7636  | 1.21 | 0.18 | 15 |
| 7 F23F1.8b;F23F1.8a  | RVGITPPK           | 20  | 696   | 0.90 | 0.06 | 7  |
| 22 F23H11.3          | AGQTHLGLPVFGSVAEAK | 19  | 2731  | 1.12 | 0.16 | 14 |
| 22 F23H11.3          | VIVQGFTGRQGTfHsk   | 24  | 4838  | 1.34 | 0.17 | 13 |
| 22 F23H11.3          | VIVQGFTGRQGTfHsk   | 13  | 3606  | 1.59 | 0.20 | 13 |
| 22 F25B4.1           | AEQLVERLLASQAGSVK  | 22  | 1441  | 0.38 | 0.32 | 84 |
| 22 F25B4.1           | NIAIAYVDK          | 12  | 1858  | 1.75 | 0.19 | 11 |
| 22 F25B4.1           | RRRETLDfPGAeHIVK   | 10  | 11059 | 1.81 | 0.18 | 10 |
| 22 F25B4.1           | MPFVPTNYFTGK       | 17  | 2587  | 2.78 | 0.06 | 2  |
| 10 F25B4.1           | NIAIAYVDK          | 49  | 4181  | 2.85 | 0.12 | 4  |
| 10 F25B4.1           | RRRETLDfPGAeHIVK   | 13  | 9490  | 2.94 | 0.22 | 7  |
| 10 F25B4.1           | MPFVPTNYFTGK       | 16  | 2247  | 5.42 | 0.08 | 2  |
| 10 F25B4.1           | MPFVPTNYFTGK       | 18  | 2204  | 7.04 | 0.22 | 3  |
| 1 F25D1.1a;F25D1.1b  | GFLSFDEISK         | 12  | 1250  | 1.66 | 0.48 | 29 |
| 22 F25D1.1a;F25D1.1b | GFLSFDEISK         | 25  | 1489  | 1.69 | 0.23 | 13 |
| 7 F25D1.1a;F25D1.1b  | GFLSFDEISK         | 33  | 1351  | 1.82 | 0.18 | 10 |
| 7 F25D1.1a;F25D1.1b  | GFLSFDEISK         | 30  | 812   | 1.98 | 0.11 | 5  |
| 22 F25D1.1a;F25D1.1b | GFLSFDEISK         | 35  | 1568  | 2.11 | 0.19 | 9  |
| 22 F25D7.4a;F25D7.4b | LLSVAPPLFNPK       | 11  | 1920  | 0.74 | 0.25 | 33 |
| 10 F25D7.4b          | YPaHIYQSAAK        | 10  | 4387  | 0.98 | 0.07 | 7  |
| 10 F25D7.4b          | SLPFLNAPTVK        | 10  | 2596  | 0.98 | 0.14 | 14 |
| 22 F25G6.9           | SLLGIADVGK         | 28  | 692   | 0.52 | 0.20 | 39 |
| 10 F25G6.9           | SLLGIADVGK         | 28  | 698   | 0.90 | 0.13 | 15 |
| 10 F25G6.9           | SLLGIADVGK         | 12  | 376   | 1.05 | 0.19 | 18 |
| 22 F25G6.9           | SLLGIADVGK         | 14  | 749   | 1.07 | 0.16 | 15 |
| 22 F25G6.9           | SLLGIADVGK         | 13  | 763   | 1.18 | 0.15 | 13 |
| 10 F25G6.9           | SLLGIADVGK         | 14  | 486   | 1.29 | 0.20 | 15 |
| 10 F25H2.10          | LVELFEeYPK         | 30  | 1161  | 0.82 | 0.17 | 20 |
| 1 F25H2.10           | LVELFEeYPK         | 21  | 442   | 0.90 | 0.15 | 17 |
| 1 F25H2.10           | LVELFEeYPK         | 24  | 521   | 0.97 | 0.10 | 10 |
| 10 F25H2.10          | TSFFQALQIPtK       | 51  | 3276  | 1.05 | 0.08 | 8  |
| 10 F25H2.10          | TSFFQALQIPtK       | 24  | 2377  | 1.29 | 0.09 | 7  |
| 10 F25H2.10          | LVELFEeYPK         | 40  | 1047  | 1.43 | 0.16 | 11 |
| 10 F25H2.10          | TSFFQALQIPtK       | 23  | 1696  | 1.45 | 0.11 | 8  |
| 10 F25H2.10          | IARGTIEILNDVHLIK   | 23  | 2163  | 1.47 | 0.16 | 11 |
| 1 F25H2.10           | TSFFQALQIPtK       | 39  | 849   | 1.57 | 0.09 | 6  |
| 22 F25H2.10          | LVELFEeYPK         | 43  | 733   | 2.75 | 0.10 | 3  |

|             |                                      |     |        |      |      |     |
|-------------|--------------------------------------|-----|--------|------|------|-----|
| 22 F25H2.10 | LVELFEEYPK                           | 32  | 908    | 2.97 | 0.11 | 4   |
| 22 F25H2.10 | TSFFQALQIPTK                         | 23  | 1638   | 3.57 | 0.09 | 3   |
| 22 F25H2.10 | TSFFQALQIPTK                         | 31  | 2162   | 3.58 | 0.16 | 4   |
| 7 F25H2.11  | DIFTDDELSSDSFPMK                     | 37  | 728    | 0.34 | 0.12 | 36  |
| 10 F25H2.11 | LVEMNCYEDASMFK                       | 73  | 3192   | 0.36 | 0.17 | 46  |
| 10 F25H2.11 | LVEMNCYEDASMFK                       | 91  | 3333   | 0.37 | 0.18 | 50  |
| 10 F25H2.11 | EGEIVLAGSNPSAEEGAEDDGSEHVERGIDIVLNHK | 27  | 8386   | 0.40 | 0.49 | 122 |
| 10 F25H2.11 | LVDDLVEYFK                           | 66  | 18475  | 0.47 | 0.07 | 15  |
| 10 F25H2.11 | LVDDLVEYFK                           | 66  | 15724  | 0.52 | 0.13 | 26  |
| 10 F25H2.11 | LVEMNCYEDASMFK                       | 90  | 3405   | 0.55 | 0.18 | 32  |
| 7 F25H2.11  | NVIDHMEK                             | 22  | 8854   | 0.62 | 0.09 | 15  |
| 22 F25H2.11 | EGEIVLAGSNPSAEEGAEDDGSEHVERGIDIVLNHK | 30  | 31466  | 0.62 | 0.07 | 11  |
| 10 F25H2.11 | IQGWVVSLAK                           | 68  | 1524   | 0.62 | 0.15 | 24  |
| 10 F25H2.11 | DIFTDDELSSDSFPMK                     | 58  | 3281   | 0.63 | 0.14 | 22  |
| 10 F25H2.11 | DIFTDDELSSDSFPMK                     | 64  | 2475   | 0.68 | 0.10 | 14  |
| 22 F25H2.11 | DIFTDDELSSDSFPMK                     | 40  | 963    | 0.68 | 0.19 | 27  |
| 10 F25H2.11 | NVIDHMEK                             | 28  | 10663  | 0.70 | 0.21 | 30  |
| 22 F25H2.11 | IQGWVVSLAK                           | 81  | 2085   | 0.70 | 0.10 | 14  |
| 7 F25H2.11  | LVDDLVEYFK                           | 67  | 4761   | 0.71 | 0.12 | 17  |
| 10 F25H2.11 | DIFTDDELSSDSFPMK                     | 79  | 9890   | 0.71 | 0.06 | 8   |
| 10 F25H2.11 | DIFTDDELSSDSFPMK                     | 104 | 9003   | 0.71 | 0.14 | 20  |
| 7 F25H2.11  | DIFTDDELSSDSFPMK                     | 67  | 2085   | 0.71 | 0.10 | 14  |
| 22 F25H2.11 | DIFTDDELSSDSFPMK                     | 61  | 1415   | 0.71 | 0.10 | 14  |
| 7 F25H2.11  | DIFTDDELSSDSFPMK                     | 85  | 3567   | 0.72 | 0.13 | 18  |
| 22 F25H2.11 | IQGWVVSLAK                           | 82  | 1633   | 0.73 | 0.19 | 26  |
| 10 F25H2.11 | DIFTDDELSSDSFPMK                     | 52  | 1491   | 0.73 | 0.21 | 29  |
| 7 F25H2.11  | LVDDLVEYFK                           | 70  | 4083   | 0.73 | 0.10 | 14  |
| 10 F25H2.11 | NVIDHMEK                             | 28  | 8060   | 0.76 | 0.15 | 20  |
| 22 F25H2.11 | LVDDLVEYFK                           | 89  | 103856 | 0.76 | 0.05 | 7   |
| 7 F25H2.11  | NVIDHMEK                             | 21  | 5415   | 0.79 | 0.16 | 20  |
| 22 F25H2.11 | LVDDLVEYFK                           | 83  | 102314 | 0.81 | 0.05 | 6   |
| 10 F25H2.11 | IQGWVVSLAK                           | 66  | 1400   | 0.81 | 0.18 | 22  |
| 22 F25H2.11 | LVDDLVEYFK                           | 55  | 2570   | 0.82 | 0.08 | 10  |
| 22 F25H2.11 | LVEMNCYEDASMFK                       | 82  | 2873   | 0.83 | 0.12 | 15  |
| 22 F25H2.11 | EGEIVLAGSNPSAEEGAEDDGSEHVERGIDIVLNHK | 25  | 25026  | 0.83 | 0.17 | 21  |
| 1 F25H2.11  | LVDDLVEYFK                           | 45  | 1601   | 0.84 | 0.13 | 16  |
| 10 F25H2.11 | NVIDHMEK                             | 23  | 43416  | 0.84 | 0.09 | 11  |
| 22 F25H2.11 | DIFTDDELSSDSFPMK                     | 84  | 20257  | 0.87 | 0.12 | 14  |
| 7 F25H2.11  | NVIDHMEK                             | 27  | 8128   | 0.87 | 0.14 | 16  |
| 22 F25H2.11 | EGEIVLAGSNPSAEEGAEDDGSEHVERGIDIVLNHK | 24  | 42222  | 0.90 | 0.29 | 33  |
| 10 F25H2.11 | NVIDHMEK                             | 26  | 40023  | 0.90 | 0.24 | 26  |
| 22 F25H2.11 | LVDDLVEYFK                           | 55  | 2873   | 0.91 | 0.15 | 16  |
| 22 F25H2.11 | NVIDHMEK                             | 17  | 63996  | 0.92 | 0.18 | 19  |
| 22 F25H2.11 | LVEMNCYEDASMFK                       | 73  | 2398   | 0.93 | 0.17 | 18  |
| 1 F25H2.11  | DIFTDDELSSDSFPMK                     | 65  | 1737   | 0.93 | 0.11 | 12  |
| 22 F25H2.11 | LVEMNCYEDASMFK                       | 78  | 3292   | 0.94 | 0.10 | 11  |
| 1 F25H2.11  | LVDDLVEYFK                           | 33  | 1620   | 0.94 | 0.13 | 14  |
| 7 F25H2.11  | DIFTDDELSSDSFPMK                     | 64  | 2209   | 0.94 | 0.06 | 7   |
| 7 F25H2.11  | NVIDHMEK                             | 27  | 7389   | 0.94 | 0.07 | 7   |
| 22 F25H2.11 | DIFTDDELSSDSFPMK                     | 90  | 22221  | 0.94 | 0.08 | 8   |
| 22 F25H2.11 | NVIDHMEK                             | 36  | 67015  | 0.94 | 0.17 | 18  |
| 7 F25H2.11  | LVEMNCYEDASMFK                       | 88  | 2151   | 0.99 | 0.12 | 12  |
| 7 F25H2.11  | DIFTDDELSSDSFPMK                     | 69  | 4023   | 1.04 | 0.10 | 9   |
| 1 F25H2.11  | DIFTDDELSSDSFPMK                     | 26  | 334    | 1.04 | 0.10 | 10  |
| 10 F25H2.11 | LVDDLVEYFK                           | 52  | 1933   | 1.07 | 0.11 | 11  |
| 10 F25H2.11 | LVDDLVEYFK                           | 51  | 2499   | 1.07 | 0.17 | 16  |
| 10 F25H2.11 | DIFTDDELSSDSFPMK                     | 58  | 4830   | 1.10 | 0.18 | 16  |
| 1 F25H2.11  | DIFTDDELSSDSFPMK                     | 86  | 1236   | 1.13 | 0.16 | 14  |
| 1 F25H2.11  | DIFTDDELSSDSFPMK                     | 66  | 2833   | 1.13 | 0.16 | 14  |
| 22 F25H2.11 | DIFTDDELSSDSFPMK                     | 91  | 5014   | 1.18 | 0.11 | 9   |
| 1 F25H2.11  | DIFTDDELSSDSFPMK                     | 53  | 3335   | 1.20 | 0.07 | 6   |
| 10 F25H2.11 | DIFTDDELSSDSFPMK                     | 99  | 7150   | 1.21 | 0.09 | 7   |
| 1 F25H2.11  | MLIYK                                | 17  | 1121   | 1.21 | 0.24 | 20  |
| 22 F25H2.11 | DIFTDDELSSDSFPMK                     | 54  | 4488   | 1.29 | 0.14 | 10  |
| 7 F25H2.11  | LVDDLVEYFK                           | 24  | 788    | 1.30 | 0.23 | 17  |
| 1 F25H2.11  | NVIDHMEK                             | 23  | 20582  | 1.31 | 0.07 | 5   |
| 22 F25H2.11 | LVDDLVEYFK                           | 43  | 2118   | 1.33 | 0.08 | 6   |
| 1 F25H2.11  | NVIDHMEK                             | 25  | 17396  | 1.35 | 0.10 | 8   |
| 22 F25H2.11 | DIFTDDELSSDSFPMK                     | 95  | 6803   | 1.35 | 0.13 | 10  |
| 7 F25H2.11  | LVDDLVEYFK                           | 63  | 2389   | 1.38 | 0.13 | 10  |
| 22 F25H2.11 | LVEMNCYEDASMFK                       | 87  | 3314   | 1.42 | 0.16 | 11  |
| 22 F25H2.11 | DIFTDDELSSDSFPMK                     | 70  | 3027   | 1.42 | 0.12 | 8   |
| 1 F25H2.11  | DIFTDDELSSDSFPMK                     | 63  | 1114   | 1.46 | 0.13 | 9   |
| 1 F25H2.11  | DIFTDDELSSDSFPMK                     | 46  | 1524   | 1.49 | 0.13 | 9   |
| 7 F25H2.11  | LVEMNCYEDASMFK                       | 83  | 2010   | 1.50 | 0.10 | 7   |
| 22 F25H2.11 | LVDDLVEYFK                           | 29  | 1387   | 1.57 | 0.16 | 10  |
| 10 F25H2.11 | DIFTDDELSSDSFPMK                     | 73  | 2999   | 1.62 | 0.13 | 8   |
| 22 F25H2.11 | LVEMNCYEDASMFK                       | 66  | 2482   | 1.67 | 0.18 | 11  |
| 10 F25H2.11 | DIFTDDELSSDSFPMK                     | 76  | 2969   | 1.78 | 0.07 | 4   |
| 1 F25H2.11  | LVDDLVEYFK                           | 32  | 905    | 1.83 | 0.14 | 8   |
| 22 F25H2.11 | MLIYK                                | 13  | 976    | 3.01 | 0.17 | 5   |
| 10 F25H2.11 | MLIYK                                | 12  | 820    | 3.30 | 0.06 | 2   |
| 22 F25H2.11 | LVEMNCYEDASMFK                       | 12  | 1675   | 9.10 | 0.36 | 4   |
| 7 F25H2.9   | SIGAASDGAEQNLK                       | 77  | 3104   | 0.34 | 0.15 | 45  |
| 7 F25H2.9   | EQYHDALTIK                           | 21  | 3944   | 0.36 | 0.14 | 38  |
| 7 F25H2.9   | SIGAASDGAEQNLK                       | 60  | 2170   | 0.39 | 0.12 | 30  |
| 7 F25H2.9   | EQYHDALTIK                           | 29  | 3194   | 0.45 | 0.17 | 37  |
| 22 F25H2.9  | LGSTSIGIK                            | 72  | 7592   | 0.47 | 0.09 | 19  |
| 10 F25H2.9  | EQYHDALTIK                           | 29  | 23965  | 0.50 | 0.20 | 40  |
| 1 F25H2.9   | EQYHDALTIK                           | 48  | 18327  | 0.53 | 0.15 | 28  |
| 10 F25H2.9  | ASMSRPFGVAMLFAGVDQEGAK               | 13  | 2133   | 0.53 | 0.10 | 19  |
| 10 F25H2.9  | SIGAASDGAEQNLK                       | 40  | 1469   | 0.58 | 0.20 | 34  |
| 22 F25H2.9  | EQYHDALTIK                           | 20  | 1384   | 0.58 | 0.14 | 24  |
| 1 F25H2.9   | EQYHDALTIK                           | 54  | 16422  | 0.60 | 0.10 | 16  |
| 10 F25H2.9  | EQYHDALTIK                           | 28  | 22225  | 0.63 | 0.11 | 18  |
| 1 F25H2.9   | LGSTSIGIK                            | 12  | 1049   | 0.65 | 0.13 | 21  |
| 22 F25H2.9  | EQYHDALTIK                           | 49  | 23368  | 0.66 | 0.11 | 17  |
| 1 F25H2.9   | TSEGVLLAAEK                          | 39  | 4175   | 0.67 | 0.15 | 23  |
| 10 F25H2.9  | ASMSRPFGVAMLFAGVDQEGAK               | 46  | 4542   | 0.67 | 0.15 | 22  |
| 22 F25H2.9  | SIGAASDGAEQNLK                       | 32  | 2670   | 0.72 | 0.08 | 11  |
| 22 F25H2.9  | EQYHDALTIK                           | 38  | 4809   | 0.74 | 0.15 | 20  |

|                                       |                         |     |       |      |      |    |
|---------------------------------------|-------------------------|-----|-------|------|------|----|
| 22 F25H2.9                            | EQYHDALTIK              | 34  | 4182  | 0.81 | 0.14 | 17 |
| 22 F25H2.9                            | EQYHDALTIK              | 56  | 32170 | 0.83 | 0.08 | 9  |
| 7 F25H2.9                             | LMVNDAIEK               | 26  | 2071  | 0.83 | 0.14 | 17 |
| 1 F25H2.9                             | LMVNDAIEK               | 26  | 1804  | 0.84 | 0.12 | 14 |
| 1 F25H2.9                             | LMVNDAIEK               | 23  | 1793  | 0.87 | 0.10 | 12 |
| 1 F25H2.9                             | LFHLDPSGTFIDCK          | 18  | 1082  | 0.88 | 0.09 | 10 |
| 10 F25H2.9                            | LMVNDAIEK               | 12  | 3795  | 0.89 | 0.07 | 8  |
| 10 F25H2.9                            | EQYHDALTIK              | 55  | 6279  | 0.89 | 0.10 | 11 |
| 22 F25H2.9                            | ASMSRPPFGVAMLFAGVDQEGAK | 58  | 8149  | 0.91 | 0.17 | 19 |
| 1 F25H2.9                             | LFHLDPSGTFIDCK          | 21  | 1053  | 0.93 | 0.11 | 12 |
| 22 F25H2.9                            | LMVNDAIEK               | 27  | 3669  | 0.93 | 0.11 | 11 |
| 10 F25H2.9                            | LMVNDAIEK               | 42  | 3809  | 0.94 | 0.15 | 16 |
| 1 F25H2.9                             | TSEGVLLAAEK             | 10  | 2819  | 0.97 | 0.11 | 12 |
| 7 F25H2.9                             | MALAILK                 | 14  | 1703  | 0.98 | 0.18 | 19 |
| 1 F25H2.9                             | ASMSRPPFGVAMLFAGVDQEGAK | 11  | 2600  | 1.00 | 0.12 | 12 |
| 22 F25H2.9                            | ASMSRPPFGVAMLFAGVDQEGAK | 57  | 7466  | 1.01 | 0.10 | 10 |
| 1 F25H2.9                             | MALAILK                 | 23  | 2662  | 1.03 | 0.11 | 10 |
| 1 F25H2.9                             | ASMSRPPFGVAMLFAGVDQEGAK | 35  | 2865  | 1.04 | 0.16 | 15 |
| 1 F25H2.9                             | LMVNDAIEK               | 13  | 7235  | 1.07 | 0.34 | 32 |
| 1 F25H2.9                             | EQYHDALTIK              | 25  | 9979  | 1.08 | 0.09 | 8  |
| 10 F25H2.9                            | SIGAASDGAEQNLK          | 99  | 14020 | 1.09 | 0.13 | 12 |
| 10 F25H2.9                            | EQYHDALTIK              | 55  | 4693  | 1.10 | 0.11 | 10 |
| 10 F25H2.9                            | EQYHDALTIK              | 45  | 9860  | 1.18 | 0.09 | 8  |
| 10 F25H2.9                            | SIGAASDGAEQNLK          | 77  | 8798  | 1.19 | 0.07 | 6  |
| 22 F25H2.9                            | LMVNDAIEK               | 23  | 3164  | 1.20 | 0.19 | 16 |
| 7 F25H2.9                             | LMVNDAIEK               | 25  | 1814  | 1.23 | 0.12 | 10 |
| 10 F25H2.9                            | EQYHDALTIK              | 37  | 6735  | 1.29 | 0.08 | 6  |
| 1 F25H2.9                             | SIGAASDGAEQNLK          | 92  | 10391 | 1.31 | 0.09 | 7  |
| 22 F25H2.9                            | LMVNDAIEK               | 24  | 5073  | 1.32 | 0.23 | 18 |
| 1 F25H2.9                             | ASMSRPPFGVAMLFAGVDQEGAK | 55  | 2748  | 1.35 | 0.13 | 9  |
| 1 F25H2.9                             | EQYHDALTIK              | 54  | 5580  | 1.36 | 0.19 | 14 |
| 7 F25H2.9                             | EQYHDALTIK              | 29  | 3773  | 1.37 | 0.13 | 9  |
| 7 F25H2.9                             | SIGAASDGAEQNLK          | 79  | 5079  | 1.40 | 0.11 | 8  |
| 7 F25H2.9                             | ASMSRPPFGVAMLFAGVDQEGAK | 27  | 3739  | 1.41 | 0.15 | 11 |
| 22 F25H2.9                            | MALAILK                 | 49  | 1411  | 1.44 | 0.09 | 6  |
| 7 F25H2.9                             | SIGAASDGAEQNLK          | 101 | 6112  | 1.44 | 0.14 | 9  |
| 1 F25H2.9                             | ASMSRPPFGVAMLFAGVDQEGAK | 43  | 2674  | 1.46 | 0.17 | 12 |
| 1 F25H2.9                             | EQYHDALTIK              | 37  | 2325  | 1.51 | 0.15 | 10 |
| 22 F25H2.9                            | EQYHDALTIK              | 31  | 7633  | 1.53 | 0.11 | 7  |
| 22 F25H2.9                            | MALAILK                 | 37  | 4621  | 1.53 | 0.15 | 10 |
| 1 F25H2.9                             | EQYHDALTIK              | 33  | 1871  | 1.60 | 0.19 | 12 |
| 1 F25H2.9                             | SIGAASDGAEQNLK          | 108 | 7272  | 1.64 | 0.10 | 6  |
| 7 F25H2.9                             | EQYHDALTIK              | 18  | 2489  | 1.66 | 0.16 | 10 |
| 10 F25H2.9                            | MALAILK                 | 51  | 2629  | 1.70 | 0.10 | 6  |
| 22 F25H2.9                            | EQYHDALTIK              | 34  | 4639  | 1.70 | 0.12 | 7  |
| 22 F25H2.9                            | SIGAASDGAEQNLK          | 91  | 8667  | 1.75 | 0.11 | 6  |
| 22 F25H2.9                            | SIGAASDGAEQNLK          | 112 | 6505  | 1.80 | 0.09 | 5  |
| 10 F25H2.9                            | MALAILK                 | 11  | 2210  | 1.92 | 0.29 | 15 |
| 1 F25H2.9                             | MALAILK                 | 40  | 1669  | 1.97 | 0.13 | 7  |
| 22 F25H2.9                            | LNSANVEVVVIKPTVDAK      | 49  | 2304  | 2.15 | 0.47 | 22 |
| 1 F25H2.9                             | MALAILK                 | 35  | 1654  | 2.40 | 0.13 | 6  |
| 10 F25H2.9                            | MALAILK                 | 11  | 620   | 2.58 | 0.13 | 5  |
| 22 F25H2.9                            | MALAILK                 | 17  | 705   | 3.23 | 0.27 | 8  |
| 7 F25H5.3b;F25H5.3a;F25H5.3c;F25H5.3d | VFLAQK                  | 19  | 1641  | 0.64 | 0.30 | 47 |
| 7 F25H5.3b;F25H5.3a;F25H5.3c;F25H5.3d | GVNLPGTIVDLPAVSEK       | 21  | 747   | 0.77 | 0.20 | 25 |
| 7 F25H5.3b;F25H5.3a;F25H5.3c;F25H5.3d | VFLAQK                  | 11  | 1262  | 0.88 | 0.20 | 22 |
| 7 F25H5.3b;F25H5.3a;F25H5.3c;F25H5.3d | VFLAQK                  | 21  | 1471  | 0.88 | 0.08 | 9  |
| 7 F25H5.3b;F25H5.3a;F25H5.3c;F25H5.3d | GVNLPGTIVDLPAVSEK       | 28  | 1166  | 0.90 | 0.08 | 9  |
| 7 F25H5.3b;F25H5.3a;F25H5.3c;F25H5.3d | VFLAQK                  | 18  | 2291  | 0.92 | 0.17 | 18 |
| 7 F25H5.3b;F25H5.3a;F25H5.3c;F25H5.3d | VFLAQK                  | 20  | 1898  | 0.94 | 0.19 | 20 |
| 7 F25H5.3b;F25H5.3a;F25H5.3c;F25H5.3d | VFLAQK                  | 13  | 1370  | 0.97 | 0.16 | 16 |
| 7 F25H5.3b;F25H5.3a;F25H5.3c;F25H5.3d | VFLAQK                  | 11  | 1695  | 1.02 | 0.26 | 26 |
| 7 F25H5.3b;F25H5.3a;F25H5.3c;F25H5.3d | GVNLPGTIVDLPAVSEK       | 67  | 4616  | 1.02 | 0.12 | 12 |
| 7 F25H5.3b;F25H5.3a;F25H5.3c;F25H5.3d | VFLAQK                  | 23  | 1729  | 1.03 | 0.13 | 12 |
| 7 F25H5.3b;F25H5.3a;F25H5.3c;F25H5.3d | GVNLPGTIVDLPAVSEK       | 42  | 3652  | 1.06 | 0.14 | 13 |
| 7 F25H5.3b;F25H5.3a;F25H5.3c;F25H5.3d | VFLAQK                  | 13  | 1058  | 1.12 | 0.22 | 20 |
| 7 F25H5.3b;F25H5.3a;F25H5.3c;F25H5.3d | VFLAQK                  | 13  | 2604  | 2.61 | 0.08 | 3  |
| 7 F25H5.3b;F25H5.3a;F25H5.3c;F25H5.3d | VFLAQK                  | 34  | 2041  | 2.80 | 0.21 | 7  |
| 10 F25H5.3b;F25H5.3c                  | VFLAQK                  | 22  | 1274  | 0.51 | 0.21 | 41 |
| 10 F25H5.3b;F25H5.3c                  | VFLAQK                  | 13  | 949   | 0.60 | 0.13 | 21 |
| 22 F25H5.3b;F25H5.3c                  | VFLAQK                  | 16  | 1500  | 0.60 | 0.13 | 22 |
| 10 F25H5.3b;F25H5.3c                  | GEYPPVDALK              | 22  | 3996  | 0.61 | 0.16 | 26 |
| 10 F25H5.3b;F25H5.3c                  | VFLAQK                  | 30  | 2083  | 0.66 | 0.07 | 10 |
| 10 F25H5.3b;F25H5.3c                  | GEYPPVDALK              | 13  | 11231 | 0.66 | 0.15 | 22 |
| 22 F25H5.3b;F25H5.3c                  | VFLAQK                  | 12  | 1312  | 0.68 | 0.15 | 23 |
| 22 F25H5.3b;F25H5.3c                  | VFLAQK                  | 18  | 1293  | 0.71 | 0.36 | 50 |
| 10 F25H5.3b;F25H5.3c                  | VFLAQK                  | 28  | 2072  | 0.83 | 0.15 | 18 |
| 10 F25H5.3b;F25H5.3c                  | GVNLPGTIVDLPAVSEK       | 33  | 2053  | 0.87 | 0.13 | 15 |
| 10 F25H5.3b;F25H5.3c                  | VFLAQK                  | 27  | 2118  | 0.88 | 0.19 | 22 |
| 22 F25H5.3b;F25H5.3c                  | VFLAQK                  | 33  | 6620  | 0.88 | 0.06 | 6  |
| 22 F25H5.3b;F25H5.3c                  | RVIGIALDTK              | 10  | 6507  | 0.93 | 0.44 | 48 |
| 22 F25H5.3b;F25H5.3c                  | GVNLPGTIVDLPAVSEK       | 61  | 6039  | 0.93 | 0.10 | 11 |
| 10 F25H5.3b;F25H5.3c                  | VFLAQK                  | 31  | 966   | 0.94 | 0.09 | 9  |
| 22 F25H5.3b;F25H5.3c                  | VFLAQK                  | 32  | 1162  | 0.97 | 0.17 | 18 |
| 22 F25H5.3b;F25H5.3c                  | VFLAQK                  | 11  | 1109  | 0.98 | 0.08 | 8  |
| 10 F25H5.3b;F25H5.3c                  | GVNLPGTIVDLPAVSEK       | 42  | 2044  | 1.01 | 0.14 | 14 |
| 10 F25H5.3b;F25H5.3c                  | VFLAQK                  | 17  | 3110  | 1.05 | 0.15 | 14 |
| 22 F25H5.3b;F25H5.3c                  | GVNLPGTIVDLPAVSEK       | 59  | 3868  | 1.19 | 0.12 | 10 |
| 10 F25H5.3b;F25H5.3c                  | GVNLPGTIVDLPAVSEK       | 58  | 6050  | 1.20 | 0.09 | 8  |
| 22 F25H5.3b;F25H5.3c                  | VFLAQK                  | 25  | 2020  | 1.27 | 0.13 | 10 |
| 22 F25H5.3b;F25H5.3c                  | VFLAQK                  | 27  | 1357  | 1.39 | 0.20 | 15 |
| 10 F25H5.3b;F25H5.3c                  | VFLAQK                  | 26  | 1987  | 1.45 | 0.09 | 6  |
| 22 F25H5.3b;F25H5.3c                  | VFLAQK                  | 19  | 2358  | 1.49 | 0.11 | 8  |
| 22 F25H5.3b;F25H5.3c                  | VFLAQK                  | 45  | 2049  | 1.57 | 0.05 | 3  |
| 10 F25H5.3b;F25H5.3c                  | VFLAQK                  | 36  | 1808  | 1.57 | 0.02 | 1  |
| 10 F25H5.3b;F25H5.3c                  | GVNLPGTIVDLPAVSEK       | 40  | 1276  | 1.63 | 0.16 | 10 |
| 22 F25H5.3b;F25H5.3c                  | RVIGIALDTK              | 10  | 13662 | 2.02 | 0.26 | 13 |
| 10 F25H5.3b;F25H5.3c                  | VFLAQK                  | 41  | 2665  | 2.05 | 0.06 | 3  |
| 10 F25H5.3b;F25H5.3c                  | VFLAQK                  | 28  | 2595  | 2.98 | 0.15 | 5  |
| 1 F25H5.3e;F25H5.3c                   | GVNLPGTIVDLPAVSEK       | 30  | 1142  | 1.13 | 0.12 | 11 |
| 1 F25H5.3e;F25H5.3c                   | GVNLPGTIVDLPAVSEK       | 57  | 2531  | 1.36 | 0.17 | 13 |

|                     |                      |    |        |      |      |     |
|---------------------|----------------------|----|--------|------|------|-----|
| 1 F25H5.3e;F25H5.3c | VFLAQK               | 30 | 3206   | 1.78 | 0.18 | 10  |
| 1 F25H5.3e;F25H5.3c | VFLAQK               | 14 | 899    | 1.80 | 0.46 | 26  |
| 7 F25H5.4           | DLEGKPLMK            | 16 | 2449   | 0.27 | 0.06 | 22  |
| 22 F25H5.4          | FSVSPVVRVAVEAK       | 28 | 2483   | 0.27 | 0.12 | 44  |
| 7 F25H5.4           | DEQERCITIK           | 38 | 5862   | 0.29 | 0.15 | 50  |
| 1 F25H5.4           | QFAEMYAGK            | 20 | 2635   | 0.30 | 0.14 | 47  |
| 10 F25H5.4          | DLEFVK               | 40 | 10998  | 0.30 | 0.14 | 48  |
| 22 F25H5.4          | YEYDVTEARK           | 47 | 4746   | 0.31 | 0.07 | 22  |
| 7 F25H5.4           | YEYDVTEARK           | 42 | 3627   | 0.32 | 0.13 | 42  |
| 7 F25H5.4           | DEQERCITIK           | 38 | 3583   | 0.32 | 0.14 | 43  |
| 10 F25H5.4          | YEYDVTEARK           | 33 | 12904  | 0.32 | 0.14 | 45  |
| 22 F25H5.4          | FSVSPVVRVAVEAK       | 24 | 2014   | 0.33 | 0.39 | 116 |
| 7 F25H5.4           | YEYDVTEARK           | 40 | 5957   | 0.33 | 0.18 | 55  |
| 10 F25H5.4          | FGVQVDK              | 50 | 55316  | 0.34 | 0.09 | 25  |
| 10 F25H5.4          | FGVQVDK              | 41 | 40881  | 0.34 | 0.10 | 29  |
| 22 F25H5.4          | YEYDVTEARK           | 37 | 4148   | 0.34 | 0.11 | 33  |
| 22 F25H5.4          | YEYDVTEARK           | 41 | 3333   | 0.36 | 0.11 | 30  |
| 22 F25H5.4          | FSVSPVVRVAVEAK       | 26 | 2479   | 0.37 | 0.21 | 55  |
| 10 F25H5.4          | YEYDVTEARK           | 43 | 11393  | 0.38 | 0.08 | 20  |
| 10 F25H5.4          | DLEEDHACIPLK         | 45 | 10505  | 0.38 | 0.17 | 46  |
| 1 F25H5.4           | QFAEMYAGK            | 37 | 4045   | 0.39 | 0.15 | 38  |
| 7 F25H5.4           | DLEGKPLMK            | 13 | 4062   | 0.40 | 0.24 | 60  |
| 7 F25H5.4           | FGVQVDK              | 28 | 22714  | 0.40 | 0.22 | 54  |
| 1 F25H5.4           | YEYDVTEARK           | 24 | 3943   | 0.42 | 0.14 | 33  |
| 22 F25H5.4          | DLEGKPLMK            | 12 | 41624  | 0.42 | 0.45 | 107 |
| 1 F25H5.4           | QFAEMYAGK            | 32 | 3518   | 0.43 | 0.11 | 25  |
| 22 F25H5.4          | GVQYLNEIK            | 62 | 21408  | 0.44 | 0.08 | 18  |
| 1 F25H5.4           | RNIRNMSVIAHVDHGK     | 20 | 19028  | 0.45 | 0.19 | 42  |
| 10 F25H5.4          | DLEEDHACIPLK         | 46 | 9885   | 0.45 | 0.14 | 31  |
| 1 F25H5.4           | RNIRNMSVIAHVDHGK     | 21 | 60151  | 0.46 | 0.18 | 39  |
| 7 F25H5.4           | YEYDVTEARK           | 24 | 2918   | 0.47 | 0.14 | 30  |
| 22 F25H5.4          | EGVPALDNYLDK         | 10 | 1494   | 0.47 | 0.29 | 61  |
| 22 F25H5.4          | DLEFVK               | 49 | 29014  | 0.47 | 0.03 | 7   |
| 1 F25H5.4           | RNIRNMSVIAHVDHGK     | 46 | 55993  | 0.47 | 0.19 | 40  |
| 22 F25H5.4          | VNFTVDEIRALMDRK      | 15 | 2707   | 0.48 | 0.11 | 22  |
| 1 F25H5.4           | YEYDVTEARK           | 24 | 2910   | 0.49 | 0.11 | 22  |
| 22 F25H5.4          | RNIRNMSVIAHVDHGK     | 35 | 53335  | 0.49 | 0.17 | 35  |
| 7 F25H5.4           | YEYDVTEARK           | 30 | 2547   | 0.50 | 0.12 | 24  |
| 10 F25H5.4          | YEYDVTEARK           | 29 | 9280   | 0.50 | 0.09 | 18  |
| 22 F25H5.4          | FGVQVDK              | 50 | 70135  | 0.50 | 0.07 | 14  |
| 22 F25H5.4          | GVQYLNEIK            | 71 | 27116  | 0.51 | 0.06 | 11  |
| 7 F25H5.4           | FGVQVDK              | 30 | 29809  | 0.51 | 0.23 | 45  |
| 1 F25H5.4           | AGIAGSK              | 12 | 2557   | 0.52 | 0.16 | 31  |
| 10 F25H5.4          | YRMEMLYEGPHDDEAAVAIK | 25 | 7572   | 0.52 | 0.17 | 32  |
| 22 F25H5.4          | YRMEMLYEGPHDDEAAVAIK | 22 | 5052   | 0.52 | 0.13 | 25  |
| 22 F25H5.4          | YRMEMLYEGPHDDEAAVAIK | 27 | 4502   | 0.52 | 0.14 | 26  |
| 7 F25H5.4           | STLTDSLVS            | 77 | 41847  | 0.52 | 0.09 | 17  |
| 22 F25H5.4          | AGETRFDTTRK          | 20 | 180174 | 0.52 | 0.15 | 28  |
| 10 F25H5.4          | YEYDVTEARK           | 39 | 9068   | 0.53 | 0.18 | 33  |
| 22 F25H5.4          | GVQYLNEIK            | 30 | 2342   | 0.54 | 0.14 | 26  |
| 22 F25H5.4          | STLTDSLVS            | 88 | 87477  | 0.54 | 0.07 | 13  |
| 10 F25H5.4          | FSVSPVVRVAVEAK       | 11 | 1124   | 0.54 | 0.13 | 23  |
| 7 F25H5.4           | DEQERCITIK           | 33 | 4210   | 0.54 | 0.23 | 42  |
| 10 F25H5.4          | GVQYLNEIK            | 17 | 4426   | 0.55 | 0.09 | 17  |
| 22 F25H5.4          | DLEFVK               | 49 | 18522  | 0.56 | 0.04 | 8   |
| 22 F25H5.4          | GVQYLNEIK            | 44 | 3447   | 0.56 | 0.18 | 32  |
| 10 F25H5.4          | QFAEMYAGK            | 72 | 31101  | 0.57 | 0.17 | 29  |
| 1 F25H5.4           | GVQYLNEIK            | 49 | 5693   | 0.57 | 0.08 | 14  |
| 22 F25H5.4          | STLTDSLVS            | 72 | 77899  | 0.58 | 0.12 | 22  |
| 7 F25H5.4           | QFAEMYAGK            | 54 | 15526  | 0.58 | 0.13 | 22  |
| 22 F25H5.4          | STLTDSLVS            | 49 | 9974   | 0.58 | 0.17 | 30  |
| 10 F25H5.4          | ARIQGPNYVPGK         | 12 | 17585  | 0.59 | 0.22 | 37  |
| 1 F25H5.4           | DLEEDHACIPLK         | 68 | 11665  | 0.59 | 0.13 | 23  |
| 10 F25H5.4          | EGVPALDNYLDK         | 10 | 16159  | 0.59 | 0.13 | 22  |
| 22 F25H5.4          | FGVQVDK              | 57 | 92092  | 0.61 | 0.09 | 15  |
| 1 F25H5.4           | ARIQGPNYVPGK         | 12 | 22957  | 0.61 | 0.28 | 46  |
| 7 F25H5.4           | STLTDSLVS            | 85 | 62493  | 0.61 | 0.06 | 9   |
| 10 F25H5.4          | STLTDSLVS            | 58 | 17077  | 0.61 | 0.09 | 14  |
| 22 F25H5.4          | STLTDSLVS            | 49 | 9903   | 0.61 | 0.22 | 36  |
| 22 F25H5.4          | DLEEDHACIPLK         | 54 | 9045   | 0.61 | 0.18 | 29  |
| 7 F25H5.4           | QFAEMYAGK            | 58 | 12170  | 0.62 | 0.16 | 25  |
| 22 F25H5.4          | DLEEDHACIPLK         | 46 | 8844   | 0.62 | 0.24 | 38  |
| 22 F25H5.4          | YRMEMLYEGPHDDEAAVAIK | 27 | 1476   | 0.64 | 0.29 | 45  |
| 22 F25H5.4          | YEYDVTEARK           | 29 | 8068   | 0.64 | 0.07 | 11  |
| 1 F25H5.4           | DLEEDHACIPLK         | 69 | 11916  | 0.64 | 0.12 | 19  |
| 22 F25H5.4          | STLTDSLVS            | 24 | 1619   | 0.65 | 0.16 | 25  |
| 7 F25H5.4           | QFAEMYAGK            | 76 | 14942  | 0.65 | 0.19 | 30  |
| 7 F25H5.4           | QFAEMYAGK            | 44 | 9742   | 0.65 | 0.19 | 29  |
| 1 F25H5.4           | RNIRNMSVIAHVDHGK     | 15 | 30220  | 0.65 | 0.16 | 24  |
| 7 F25H5.4           | FGVQVDK              | 52 | 24519  | 0.66 | 0.09 | 13  |
| 10 F25H5.4          | GVQYLNEIK            | 63 | 33050  | 0.66 | 0.04 | 6   |
| 10 F25H5.4          | QFAEMYAGK            | 93 | 25352  | 0.66 | 0.30 | 45  |
| 1 F25H5.4           | QFAEMYAGK            | 33 | 3726   | 0.66 | 0.15 | 23  |
| 1 F25H5.4           | YEYDVTEARK           | 22 | 3263   | 0.67 | 0.12 | 18  |
| 10 F25H5.4          | STLTDSLVS            | 76 | 24721  | 0.67 | 0.11 | 16  |
| 1 F25H5.4           | ARIQGPNYVPGK         | 14 | 19249  | 0.67 | 0.31 | 46  |
| 7 F25H5.4           | NLWGDFFDLK           | 15 | 6743   | 0.67 | 0.12 | 19  |
| 1 F25H5.4           | AGIAGSK              | 11 | 1937   | 0.67 | 0.17 | 26  |
| 1 F25H5.4           | YRMEMLYEGPHDDEAAVAIK | 13 | 866    | 0.67 | 0.30 | 44  |
| 10 F25H5.4          | YRMEMLYEGPHDDEAAVAIK | 16 | 6059   | 0.68 | 0.08 | 12  |
| 22 F25H5.4          | YEYDVTEARK           | 45 | 6686   | 0.68 | 0.07 | 11  |
| 7 F25H5.4           | FGVQVDK              | 53 | 26432  | 0.68 | 0.11 | 17  |
| 22 F25H5.4          | DEQERCITIK           | 32 | 15292  | 0.69 | 0.11 | 17  |
| 1 F25H5.4           | GVQYLNEIK            | 59 | 3806   | 0.69 | 0.09 | 13  |
| 10 F25H5.4          | YRMEMLYEGPHDDEAAVAIK | 30 | 7380   | 0.69 | 0.10 | 14  |
| 10 F25H5.4          | QFAEMYAGK            | 40 | 15865  | 0.70 | 0.07 | 11  |
| 10 F25H5.4          | YRMEMLYEGPHDDEAAVAIK | 22 | 10298  | 0.71 | 0.09 | 12  |
| 22 F25H5.4          | RNIRNMSVIAHVDHGK     | 31 | 237904 | 0.71 | 0.14 | 20  |
| 1 F25H5.4           | STLTDSLVS            | 68 | 27876  | 0.72 | 0.07 | 10  |
| 10 F25H5.4          | YRMEMLYEGPHDDEAAVAIK | 21 | 6326   | 0.72 | 0.15 | 20  |
| 22 F25H5.4          | STLTDSLVS            | 15 | 1411   | 0.72 | 0.19 | 26  |

|            |                      |    |        |      |      |    |
|------------|----------------------|----|--------|------|------|----|
| 22 F25H5.4 | RNIRNMSVIAHVDHGK     | 11 | 34343  | 0.73 | 0.17 | 24 |
| 7 F25H5.4  | GVQYLNEIK            | 38 | 2332   | 0.73 | 0.08 | 11 |
| 10 F25H5.4 | RNIRNMSVIAHVDHGK     | 30 | 105635 | 0.73 | 0.11 | 15 |
| 22 F25H5.4 | STLTDSLVS            | 27 | 2173   | 0.73 | 0.28 | 39 |
| 7 F25H5.4  | DLEEDHACIPLK         | 46 | 4090   | 0.73 | 0.12 | 17 |
| 10 F25H5.4 | DLEGKPLMK            | 29 | 24908  | 0.73 | 0.20 | 27 |
| 22 F25H5.4 | AGETRFTDTRK          | 21 | 9328   | 0.74 | 0.54 | 74 |
| 22 F25H5.4 | QFAEMYAGK            | 44 | 7419   | 0.74 | 0.17 | 23 |
| 1 F25H5.4  | QFAEMYAGK            | 50 | 2497   | 0.74 | 0.15 | 20 |
| 22 F25H5.4 | QFAEMYAGK            | 77 | 39540  | 0.74 | 0.10 | 14 |
| 10 F25H5.4 | NLWGDRFFDLK          | 18 | 13351  | 0.75 | 0.17 | 23 |
| 1 F25H5.4  | YEYDVTEARK           | 23 | 4051   | 0.75 | 0.10 | 14 |
| 22 F25H5.4 | YEYDVTEARK           | 30 | 3380   | 0.75 | 0.16 | 22 |
| 10 F25H5.4 | YEYDVTEARK           | 29 | 2932   | 0.75 | 0.11 | 15 |
| 22 F25H5.4 | DLEEDHACIPLK         | 49 | 3020   | 0.75 | 0.14 | 18 |
| 10 F25H5.4 | FSVSPVVRVAVEAK       | 17 | 8289   | 0.76 | 0.07 | 9  |
| 1 F25H5.4  | ARIQGPNYVPGK         | 28 | 2420   | 0.76 | 0.14 | 18 |
| 1 F25H5.4  | RNIRNMSVIAHVDHGK     | 16 | 69951  | 0.76 | 0.17 | 23 |
| 7 F25H5.4  | GVQYLNEIK            | 34 | 2767   | 0.77 | 0.10 | 13 |
| 22 F25H5.4 | QFAEMYAGK            | 82 | 48113  | 0.77 | 0.21 | 27 |
| 10 F25H5.4 | RNIRNMSVIAHVDHGK     | 25 | 75039  | 0.77 | 0.08 | 10 |
| 22 F25H5.4 | STLTDSLVS            | 55 | 3418   | 0.78 | 0.14 | 18 |
| 10 F25H5.4 | AGETRFTDTRK          | 14 | 8036   | 0.78 | 0.72 | 93 |
| 7 F25H5.4  | STLTDSLVS            | 19 | 1273   | 0.79 | 0.13 | 17 |
| 10 F25H5.4 | YRMEMLYEGPHDDEAAVAIK | 11 | 5025   | 0.79 | 0.18 | 23 |
| 7 F25H5.4  | DLEEDHACIPLK         | 15 | 2422   | 0.79 | 0.14 | 18 |
| 7 F25H5.4  | YEYDVTEARK           | 34 | 9717   | 0.79 | 0.10 | 13 |
| 1 F25H5.4  | QFAEMYAGK            | 61 | 4805   | 0.79 | 0.12 | 15 |
| 10 F25H5.4 | QFAEMYAGK            | 38 | 18448  | 0.80 | 0.07 | 9  |
| 7 F25H5.4  | YEYDVTEARK           | 44 | 15381  | 0.80 | 0.12 | 15 |
| 7 F25H5.4  | GVQYLNEIK            | 42 | 3150   | 0.80 | 0.13 | 17 |
| 7 F25H5.4  | AGETRFTDTRK          | 16 | 27254  | 0.81 | 0.30 | 37 |
| 10 F25H5.4 | YRMEMLYEGPHDDEAAVAIK | 10 | 4655   | 0.81 | 0.26 | 32 |
| 10 F25H5.4 | DLEEDHACIPLK         | 34 | 3041   | 0.81 | 0.15 | 19 |
| 1 F25H5.4  | STLTDSLVS            | 83 | 29945  | 0.81 | 0.07 | 9  |
| 10 F25H5.4 | GVQYLNEIK            | 61 | 36242  | 0.81 | 0.07 | 8  |
| 7 F25H5.4  | RNIRNMSVIAHVDHGK     | 12 | 8867   | 0.82 | 0.14 | 17 |
| 7 F25H5.4  | DLEEDHACIPLK         | 67 | 7347   | 0.82 | 0.11 | 13 |
| 22 F25H5.4 | QFAEMYAGK            | 46 | 30754  | 0.82 | 0.11 | 14 |
| 7 F25H5.4  | DLEEDHACIPLK         | 63 | 8302   | 0.82 | 0.15 | 19 |
| 22 F25H5.4 | ARIQGPNYVPGK         | 25 | 6132   | 0.82 | 0.09 | 11 |
| 10 F25H5.4 | RNIRNMSVIAHVDHGK     | 27 | 45820  | 0.82 | 0.14 | 17 |
| 7 F25H5.4  | YRMEMLYEGPHDDEAAVAIK | 45 | 4169   | 0.82 | 0.10 | 13 |
| 22 F25H5.4 | RNIRNMSVIAHVDHGK     | 14 | 184097 | 0.83 | 0.10 | 12 |
| 22 F25H5.4 | VNFTVDEIRALMDRK      | 10 | 2663   | 0.83 | 0.12 | 15 |
| 1 F25H5.4  | YEYDVTEARK           | 38 | 6996   | 0.83 | 0.09 | 11 |
| 10 F25H5.4 | STLTDSLVS            | 82 | 110742 | 0.84 | 0.09 | 10 |
| 10 F25H5.4 | STLTDSLVS            | 46 | 2872   | 0.85 | 0.12 | 14 |
| 22 F25H5.4 | YEYDVTEARK           | 37 | 15995  | 0.85 | 0.08 | 9  |
| 22 F25H5.4 | STLTDSLVS            | 44 | 5475   | 0.86 | 0.12 | 14 |
| 1 F25H5.4  | YEYDVTEARK           | 49 | 9737   | 0.86 | 0.09 | 10 |
| 10 F25H5.4 | STLTDSLVS            | 86 | 108363 | 0.86 | 0.09 | 10 |
| 7 F25H5.4  | DLEEDHACIPLK         | 36 | 3066   | 0.86 | 0.14 | 16 |
| 7 F25H5.4  | GVQYLNEIK            | 39 | 2347   | 0.86 | 0.15 | 18 |
| 10 F25H5.4 | GVQYLNEIK            | 10 | 1186   | 0.86 | 0.08 | 10 |
| 10 F25H5.4 | NLWGDRFFDLK          | 20 | 11528  | 0.86 | 0.25 | 29 |
| 10 F25H5.4 | YRMEMLYEGPHDDEAAVAIK | 14 | 5361   | 0.86 | 0.11 | 13 |
| 1 F25H5.4  | ARIQGPNYVPGK         | 13 | 10427  | 0.87 | 0.25 | 29 |
| 10 F25H5.4 | RNIRNMSVIAHVDHGK     | 16 | 55464  | 0.87 | 0.18 | 21 |
| 10 F25H5.4 | YRMEMLYEGPHDDEAAVAIK | 29 | 5779   | 0.87 | 0.11 | 13 |
| 7 F25H5.4  | STLTDSLVS            | 41 | 2136   | 0.88 | 0.13 | 15 |
| 7 F25H5.4  | VFMRK                | 15 | 14235  | 0.88 | 0.05 | 5  |
| 10 F25H5.4 | VNFTVDEIRALMDRK      | 13 | 4903   | 0.88 | 0.05 | 6  |
| 10 F25H5.4 | YEYDVTEARK           | 42 | 15956  | 0.88 | 0.13 | 15 |
| 22 F25H5.4 | ARIQGPNYVPGK         | 39 | 9134   | 0.88 | 0.23 | 26 |
| 22 F25H5.4 | STLTDSLVS            | 45 | 4969   | 0.88 | 0.13 | 14 |
| 22 F25H5.4 | STLTDSLVS            | 78 | 112137 | 0.88 | 0.10 | 11 |
| 7 F25H5.4  | YEYDVTEARK           | 26 | 4625   | 0.89 | 0.11 | 13 |
| 22 F25H5.4 | ARIQGPNYVPGK         | 37 | 6035   | 0.89 | 0.12 | 14 |
| 10 F25H5.4 | YRMEMLYEGPHDDEAAVAIK | 26 | 3599   | 0.89 | 0.22 | 25 |
| 10 F25H5.4 | AGETRFTDTRK          | 12 | 7258   | 0.90 | 0.08 | 9  |
| 7 F25H5.4  | DLEGKPLMK            | 24 | 15939  | 0.91 | 0.11 | 13 |
| 7 F25H5.4  | QFAEMYAGK            | 37 | 17550  | 0.91 | 0.08 | 9  |
| 7 F25H5.4  | RNIRNMSVIAHVDHGK     | 11 | 31426  | 0.92 | 0.08 | 9  |
| 1 F25H5.4  | RNIRNMSVIAHVDHGK     | 28 | 21531  | 0.92 | 0.12 | 13 |
| 7 F25H5.4  | VFMRK                | 15 | 21550  | 0.92 | 0.08 | 9  |
| 22 F25H5.4 | QFAEMYAGK            | 36 | 804    | 0.93 | 0.16 | 18 |
| 22 F25H5.4 | YRMEMLYEGPHDDEAAVAIK | 23 | 3044   | 0.93 | 0.26 | 28 |
| 22 F25H5.4 | EGVPALDNYLDK         | 11 | 10844  | 0.94 | 0.32 | 35 |
| 7 F25H5.4  | DLEEDHACIPLK         | 29 | 3377   | 0.94 | 0.18 | 19 |
| 10 F25H5.4 | FSVSPVVRVAVEAK       | 11 | 3023   | 0.94 | 0.10 | 11 |
| 7 F25H5.4  | RNIRNMSVIAHVDHGK     | 48 | 6961   | 0.94 | 0.23 | 25 |
| 22 F25H5.4 | DLEEDHACIPLK         | 23 | 2932   | 0.94 | 0.18 | 19 |
| 22 F25H5.4 | RNIRNMSVIAHVDHGK     | 21 | 426170 | 0.94 | 0.15 | 15 |
| 22 F25H5.4 | YEYDVTEARK           | 56 | 10798  | 0.94 | 0.09 | 9  |
| 7 F25H5.4  | RNIRNMSVIAHVDHGK     | 13 | 66929  | 0.95 | 0.06 | 6  |
| 1 F25H5.4  | ARIQGPNYVPGK         | 37 | 7897   | 0.95 | 0.11 | 11 |
| 22 F25H5.4 | GVQYLNEIK            | 47 | 10505  | 0.95 | 0.05 | 5  |
| 1 F25H5.4  | DLEGKPLMK            | 12 | 10912  | 0.95 | 0.37 | 39 |
| 10 F25H5.4 | TAALVEK              | 53 | 11195  | 0.96 | 0.16 | 17 |
| 10 F25H5.4 | ARIQGPNYVPGK         | 24 | 14323  | 0.96 | 0.12 | 12 |
| 7 F25H5.4  | YRMEMLYEGPHDDEAAVAIK | 24 | 2954   | 0.96 | 0.28 | 29 |
| 22 F25H5.4 | YEYDVTEARK           | 30 | 2717   | 0.96 | 0.11 | 11 |
| 22 F25H5.4 | YRMEMLYEGPHDDEAAVAIK | 45 | 6331   | 0.96 | 0.15 | 15 |
| 1 F25H5.4  | RNIRNMSVIAHVDHGK     | 11 | 53788  | 0.96 | 0.10 | 11 |
| 10 F25H5.4 | ARIQGPNYVPGK         | 36 | 5282   | 0.97 | 0.15 | 15 |
| 1 F25H5.4  | YEYDVTEARK           | 15 | 3283   | 0.97 | 0.11 | 11 |
| 7 F25H5.4  | ARIQGPNYVPGK         | 13 | 8603   | 0.97 | 0.32 | 33 |
| 22 F25H5.4 | RNIRNMSVIAHVDHGK     | 11 | 261536 | 0.97 | 0.09 | 9  |
| 22 F25H5.4 | YEYDVTEARK           | 38 | 6639   | 0.97 | 0.07 | 7  |
| 22 F25H5.4 | RNIRNMSVIAHVDHGK     | 15 | 384717 | 0.98 | 0.12 | 12 |

|            |                      |    |        |      |      |    |
|------------|----------------------|----|--------|------|------|----|
| 22 F25H5.4 | VFMRK                | 15 | 54442  | 0.98 | 0.02 | 2  |
| 10 F25H5.4 | AGETRFTDTRK          | 19 | 50471  | 0.98 | 0.22 | 22 |
| 22 F25H5.4 | YEYDVTEARK           | 61 | 5708   | 0.98 | 0.12 | 12 |
| 10 F25H5.4 | QFAEMYAGK            | 23 | 2884   | 0.98 | 0.15 | 15 |
| 1 F25H5.4  | RNIRNMSVIAHVDHGK     | 11 | 8159   | 0.98 | 0.13 | 13 |
| 10 F25H5.4 | YEYDVTEARK           | 30 | 3743   | 0.98 | 0.16 | 16 |
| 1 F25H5.4  | DLEEDHACIPLK         | 21 | 1181   | 0.99 | 0.12 | 12 |
| 10 F25H5.4 | YEYDVTEARK           | 48 | 7968   | 0.99 | 0.07 | 7  |
| 22 F25H5.4 | ARIQGPNYVPGK         | 49 | 12077  | 0.99 | 0.11 | 11 |
| 10 F25H5.4 | GVQYLNEIK            | 46 | 3367   | 0.99 | 0.14 | 14 |
| 22 F25H5.4 | VFMRK                | 18 | 59348  | 1.00 | 0.09 | 9  |
| 7 F25H5.4  | YEYDVTEARK           | 27 | 4921   | 1.00 | 0.11 | 11 |
| 10 F25H5.4 | YEYDVTEARK           | 27 | 8347   | 1.01 | 0.10 | 10 |
| 10 F25H5.4 | FSVSPVVRVAVEAK       | 19 | 2630   | 1.01 | 0.11 | 11 |
| 7 F25H5.4  | RNIRNMSVIAHVDHGK     | 10 | 47576  | 1.01 | 0.09 | 9  |
| 10 F25H5.4 | YRMEMLYEGPHDDEAAVAIK | 12 | 2532   | 1.02 | 0.11 | 11 |
| 7 F25H5.4  | YRMEMLYEGPHDDEAAVAIK | 43 | 3371   | 1.02 | 0.12 | 12 |
| 10 F25H5.4 | STLTDSLVS            | 19 | 1180   | 1.02 | 0.11 | 11 |
| 22 F25H5.4 | STLTDSLVS            | 75 | 103644 | 1.03 | 0.10 | 9  |
| 1 F25H5.4  | RNIRNMSVIAHVDHGK     | 12 | 121535 | 1.03 | 0.08 | 8  |
| 1 F25H5.4  | ARIQGPNYVPGK         | 29 | 3697   | 1.04 | 0.11 | 10 |
| 7 F25H5.4  | RNIRNMSVIAHVDHGK     | 26 | 9290   | 1.04 | 0.28 | 27 |
| 22 F25H5.4 | GVQYLNEIK            | 62 | 3627   | 1.04 | 0.10 | 10 |
| 22 F25H5.4 | ARIQGPNYVPGK         | 25 | 4037   | 1.04 | 0.14 | 14 |
| 1 F25H5.4  | STLTDSLVS            | 17 | 1806   | 1.06 | 0.11 | 11 |
| 10 F25H5.4 | RNIRNMSVIAHVDHGK     | 23 | 219789 | 1.06 | 0.14 | 13 |
| 10 F25H5.4 | YEYDVTEARK           | 39 | 5632   | 1.06 | 0.14 | 13 |
| 10 F25H5.4 | FSVSPVVRVAVEAK       | 12 | 9277   | 1.07 | 0.19 | 18 |
| 10 F25H5.4 | YEYDVTEARK           | 47 | 7151   | 1.07 | 0.08 | 7  |
| 7 F25H5.4  | RNIRNMSVIAHVDHGK     | 15 | 35230  | 1.07 | 0.09 | 9  |
| 10 F25H5.4 | AGIAGSK              | 19 | 30790  | 1.08 | 0.31 | 29 |
| 22 F25H5.4 | GRFYAFGRVFSGK        | 14 | 2869   | 1.08 | 0.09 | 9  |
| 1 F25H5.4  | ARIQGPNYVPGK         | 46 | 11479  | 1.08 | 0.11 | 11 |
| 22 F25H5.4 | QFAEMYAGK            | 52 | 31325  | 1.08 | 0.10 | 9  |
| 7 F25H5.4  | QFAEMYAGK            | 51 | 14717  | 1.08 | 0.12 | 11 |
| 10 F25H5.4 | FGVQVDK              | 36 | 14263  | 1.08 | 0.12 | 11 |
| 1 F25H5.4  | YEYDVTEARK           | 19 | 2344   | 1.08 | 0.10 | 9  |
| 10 F25H5.4 | YEYDVTEARK           | 34 | 7389   | 1.08 | 0.13 | 12 |
| 22 F25H5.4 | GVQYLNEIK            | 56 | 12006  | 1.09 | 0.06 | 6  |
| 7 F25H5.4  | VNFTVDEIRALMDRK      | 11 | 14252  | 1.09 | 0.23 | 21 |
| 10 F25H5.4 | ARIQGPNYVPGK         | 10 | 21479  | 1.09 | 0.13 | 12 |
| 10 F25H5.4 | STLTDSLVS            | 33 | 2980   | 1.10 | 0.09 | 8  |
| 10 F25H5.4 | VNFTVDEIRALMDRK      | 11 | 4345   | 1.12 | 0.19 | 17 |
| 22 F25H5.4 | STLTDSLVS            | 12 | 4358   | 1.12 | 0.11 | 10 |
| 22 F25H5.4 | GVQYLNEIK            | 25 | 2120   | 1.12 | 0.10 | 9  |
| 7 F25H5.4  | YRMEMLYEGPHDDEAAVAIK | 32 | 2466   | 1.13 | 0.20 | 17 |
| 10 F25H5.4 | RNIRNMSVIAHVDHGK     | 24 | 303207 | 1.13 | 0.09 | 8  |
| 7 F25H5.4  | ARIQGPNYVPGK         | 16 | 8061   | 1.13 | 0.13 | 11 |
| 22 F25H5.4 | GRFYAFGRVFSGK        | 14 | 3870   | 1.14 | 0.11 | 9  |
| 10 F25H5.4 | QFAEMYAGK            | 49 | 9160   | 1.14 | 0.21 | 19 |
| 10 F25H5.4 | RNIRNMSVIAHVDHGK     | 13 | 28605  | 1.14 | 0.20 | 17 |
| 22 F25H5.4 | ARIQGPNYVPGK         | 41 | 12597  | 1.14 | 0.05 | 4  |
| 7 F25H5.4  | RNIRNMSVIAHVDHGK     | 17 | 26401  | 1.14 | 0.16 | 14 |
| 10 F25H5.4 | GVQYLNEIK            | 20 | 3241   | 1.15 | 0.13 | 12 |
| 22 F25H5.4 | ARIQGPNYVPGK         | 20 | 6561   | 1.15 | 0.18 | 16 |
| 22 F25H5.4 | ARIQGPNYVPGK         | 53 | 4581   | 1.16 | 0.10 | 9  |
| 7 F25H5.4  | ARIQGPNYVPGK         | 23 | 5877   | 1.16 | 0.11 | 10 |
| 10 F25H5.4 | VFMRK                | 16 | 47502  | 1.16 | 0.02 | 2  |
| 7 F25H5.4  | YRMEMLYEGPHDDEAAVAIK | 33 | 3449   | 1.17 | 0.17 | 15 |
| 22 F25H5.4 | RNIRNMSVIAHVDHGK     | 30 | 57141  | 1.17 | 0.08 | 7  |
| 1 F25H5.4  | YRMEMLYEGPHDDEAAVAIK | 28 | 5643   | 1.18 | 0.13 | 11 |
| 7 F25H5.4  | FSVSPVVRVAVEAK       | 18 | 2502   | 1.19 | 0.20 | 17 |
| 22 F25H5.4 | YRMEMLYEGPHDDEAAVAIK | 36 | 4881   | 1.20 | 0.19 | 16 |
| 10 F25H5.4 | ARIQGPNYVPGK         | 42 | 5226   | 1.20 | 0.13 | 11 |
| 10 F25H5.4 | FGVQVDK              | 28 | 8394   | 1.20 | 0.13 | 10 |
| 10 F25H5.4 | STLTDSLVS            | 39 | 3475   | 1.20 | 0.09 | 8  |
| 1 F25H5.4  | DAHNMVMK             | 11 | 9931   | 1.21 | 0.19 | 15 |
| 1 F25H5.4  | YRMEMLYEGPHDDEAAVAIK | 35 | 8923   | 1.21 | 0.22 | 18 |
| 7 F25H5.4  | FSVSPVVRVAVEAK       | 40 | 2647   | 1.22 | 0.14 | 12 |
| 22 F25H5.4 | RNIRNMSVIAHVDHGK     | 20 | 351013 | 1.22 | 0.08 | 6  |
| 10 F25H5.4 | TAALVEK              | 22 | 5870   | 1.23 | 0.10 | 8  |
| 1 F25H5.4  | YRMEMLYEGPHDDEAAVAIK | 16 | 2943   | 1.23 | 0.18 | 15 |
| 7 F25H5.4  | AGIAGSK              | 25 | 7749   | 1.23 | 0.18 | 14 |
| 7 F25H5.4  | ARIQGPNYVPGK         | 25 | 16239  | 1.23 | 0.03 | 3  |
| 22 F25H5.4 | GVQYLNEIK            | 53 | 3451   | 1.23 | 0.13 | 10 |
| 22 F25H5.4 | GVQYLNEIK            | 40 | 6968   | 1.23 | 0.08 | 6  |
| 22 F25H5.4 | YRMEMLYEGPHDDEAAVAIK | 13 | 3657   | 1.24 | 0.13 | 11 |
| 1 F25H5.4  | YRMEMLYEGPHDDEAAVAIK | 13 | 8099   | 1.24 | 0.10 | 8  |
| 22 F25H5.4 | FSVSPVVRVAVEAK       | 24 | 4149   | 1.24 | 0.60 | 49 |
| 7 F25H5.4  | QFAEMYAGK            | 59 | 6369   | 1.25 | 0.07 | 6  |
| 1 F25H5.4  | RNIRNMSVIAHVDHGK     | 14 | 10740  | 1.25 | 0.11 | 9  |
| 7 F25H5.4  | VNFTVDEIRALMDRK      | 12 | 9531   | 1.26 | 0.23 | 18 |
| 7 F25H5.4  | QFAEMYAGK            | 40 | 1963   | 1.27 | 0.09 | 7  |
| 10 F25H5.4 | QFAEMYAGK            | 32 | 2829   | 1.28 | 0.20 | 16 |
| 22 F25H5.4 | FGVQVDK              | 32 | 15329  | 1.28 | 0.08 | 6  |
| 22 F25H5.4 | GVQYLNEIK            | 35 | 4912   | 1.28 | 0.09 | 7  |
| 10 F25H5.4 | RNIRNMSVIAHVDHGK     | 20 | 294628 | 1.29 | 0.12 | 10 |
| 10 F25H5.4 | YRMEMLYEGPHDDEAAVAIK | 18 | 4341   | 1.29 | 0.18 | 14 |
| 1 F25H5.4  | YEYDVTEARK           | 19 | 2769   | 1.29 | 0.20 | 15 |
| 22 F25H5.4 | STLTDSLVS            | 17 | 1258   | 1.30 | 0.17 | 13 |
| 22 F25H5.4 | FGVQVDK              | 30 | 16153  | 1.31 | 0.07 | 5  |
| 22 F25H5.4 | RNIRNMSVIAHVDHGK     | 10 | 16752  | 1.33 | 0.13 | 10 |
| 22 F25H5.4 | QFAEMYAGK            | 64 | 21597  | 1.33 | 0.04 | 3  |
| 10 F25H5.4 | GVQYLNEIK            | 61 | 13811  | 1.34 | 0.07 | 5  |
| 22 F25H5.4 | GVQYLNEIK            | 67 | 19827  | 1.34 | 0.09 | 7  |
| 22 F25H5.4 | YRMEMLYEGPHDDEAAVAIK | 47 | 4604   | 1.34 | 0.16 | 12 |
| 10 F25H5.4 | QFAEMYAGK            | 65 | 14385  | 1.34 | 0.19 | 14 |
| 10 F25H5.4 | RNIRNMSVIAHVDHGK     | 12 | 2915   | 1.35 | 0.32 | 23 |
| 22 F25H5.4 | STLTDSLVS            | 49 | 4553   | 1.36 | 0.12 | 9  |
| 7 F25H5.4  | YEYDVTEARK           | 42 | 7588   | 1.36 | 0.08 | 6  |
| 1 F25H5.4  | GRFYAFGRVFSGK        | 11 | 2701   | 1.37 | 0.12 | 8  |

|            |                      |    |        |      |      |    |
|------------|----------------------|----|--------|------|------|----|
| 22 F25H5.4 | DLEGKPLMK            | 13 | 21313  | 1.39 | 0.12 | 9  |
| 7 F25H5.4  | YEYDVTEARK           | 45 | 4866   | 1.39 | 0.09 | 6  |
| 10 F25H5.4 | ARIQGPNYVPGK         | 39 | 8647   | 1.40 | 0.06 | 5  |
| 22 F25H5.4 | YRMEMLYEGPHDDEAAVAIK | 37 | 2361   | 1.40 | 0.19 | 14 |
| 22 F25H5.4 | YRMEMLYEGPHDDEAAVAIK | 23 | 3814   | 1.40 | 0.18 | 13 |
| 22 F25H5.4 | QFAEMYAGK            | 70 | 17514  | 1.41 | 0.14 | 10 |
| 10 F25H5.4 | GVQYLNEIK            | 57 | 13712  | 1.42 | 0.06 | 4  |
| 22 F25H5.4 | GRFYAFGRVFSGK        | 14 | 3540   | 1.42 | 0.13 | 9  |
| 22 F25H5.4 | STLTDSLVS            | 13 | 1296   | 1.42 | 0.19 | 13 |
| 10 F25H5.4 | RNIRNMSVIAHVDHGK     | 32 | 12122  | 1.43 | 0.30 | 21 |
| 7 F25H5.4  | YRMEMLYEGPHDDEAAVAIK | 17 | 5266   | 1.44 | 0.12 | 8  |
| 10 F25H5.4 | QFAEMYAGK            | 71 | 10145  | 1.44 | 0.11 | 8  |
| 10 F25H5.4 | RNIRNMSVIAHVDHGK     | 23 | 419123 | 1.44 | 0.13 | 9  |
| 1 F25H5.4  | GVQYLNEIK            | 27 | 3178   | 1.45 | 0.13 | 9  |
| 22 F25H5.4 | YRMEMLYEGPHDDEAAVAIK | 12 | 2357   | 1.45 | 0.25 | 17 |
| 7 F25H5.4  | RNIRNMSVIAHVDHGK     | 12 | 10247  | 1.45 | 0.13 | 9  |
| 10 F25H5.4 | RNIRNMSVIAHVDHGK     | 29 | 436268 | 1.46 | 0.08 | 6  |
| 22 F25H5.4 | GVQYLNEIK            | 66 | 21523  | 1.46 | 0.04 | 3  |
| 7 F25H5.4  | GGTITTYK             | 23 | 1929   | 1.46 | 0.29 | 20 |
| 10 F25H5.4 | RNIRNMSVIAHVDHGK     | 39 | 8352   | 1.47 | 0.16 | 11 |
| 10 F25H5.4 | STLTDSLVS            | 63 | 5075   | 1.47 | 0.13 | 9  |
| 1 F25H5.4  | ARIQGPNYVPGK         | 20 | 2972   | 1.47 | 0.08 | 6  |
| 10 F25H5.4 | YRMEMLYEGPHDDEAAVAIK | 22 | 6588   | 1.47 | 0.23 | 16 |
| 22 F25H5.4 | VFMRK                | 14 | 986    | 1.48 | 0.13 | 9  |
| 7 F25H5.4  | GVQYLNEIK            | 15 | 1686   | 1.49 | 0.11 | 7  |
| 10 F25H5.4 | GVQYLNEIK            | 50 | 9888   | 1.50 | 0.05 | 3  |
| 7 F25H5.4  | ARIQGPNYVPGK         | 16 | 12504  | 1.51 | 0.23 | 15 |
| 1 F25H5.4  | STLTDSLVS            | 25 | 1584   | 1.53 | 0.09 | 6  |
| 10 F25H5.4 | GVQYLNEIK            | 56 | 10738  | 1.54 | 0.07 | 5  |
| 1 F25H5.4  | YRMEMLYEGPHDDEAAVAIK | 36 | 6145   | 1.54 | 0.10 | 7  |
| 1 F25H5.4  | RNIRNMSVIAHVDHGK     | 12 | 17471  | 1.54 | 0.06 | 4  |
| 10 F25H5.4 | YRMEMLYEGPHDDEAAVAIK | 44 | 6909   | 1.54 | 0.15 | 10 |
| 1 F25H5.4  | YRMEMLYEGPHDDEAAVAIK | 12 | 3899   | 1.55 | 0.13 | 8  |
| 10 F25H5.4 | DLEGKPLMK            | 22 | 15379  | 1.55 | 0.18 | 12 |
| 22 F25H5.4 | GVQYLNEIK            | 33 | 2662   | 1.55 | 0.13 | 9  |
| 10 F25H5.4 | ARIQGPNYVPGK         | 48 | 12330  | 1.55 | 0.11 | 7  |
| 22 F25H5.4 | RNIRNMSVIAHVDHGK     | 29 | 42682  | 1.55 | 0.11 | 7  |
| 10 F25H5.4 | STLTDSLVS            | 13 | 3181   | 1.55 | 0.33 | 21 |
| 1 F25H5.4  | ARIQGPNYVPGK         | 27 | 2665   | 1.57 | 0.19 | 12 |
| 22 F25H5.4 | RNIRNMSVIAHVDHGK     | 24 | 22565  | 1.59 | 0.24 | 15 |
| 1 F25H5.4  | FSVSPVVRVAVEAK       | 15 | 3204   | 1.59 | 0.18 | 11 |
| 22 F25H5.4 | VNFTVDEIRALMDRK      | 10 | 20146  | 1.61 | 0.23 | 14 |
| 7 F25H5.4  | STLTDSLVS            | 16 | 3217   | 1.61 | 0.19 | 12 |
| 10 F25H5.4 | YRMEMLYEGPHDDEAAVAIK | 19 | 4071   | 1.61 | 0.14 | 8  |
| 10 F25H5.4 | QFAEMYAGK            | 46 | 7611   | 1.62 | 0.14 | 8  |
| 10 F25H5.4 | RNIRNMSVIAHVDHGK     | 29 | 37240  | 1.63 | 0.09 | 6  |
| 22 F25H5.4 | RNIRNMSVIAHVDHGK     | 11 | 28863  | 1.64 | 0.18 | 11 |
| 10 F25H5.4 | ARIQGPNYVPGK         | 36 | 7236   | 1.66 | 0.14 | 8  |
| 10 F25H5.4 | RNIRNMSVIAHVDHGK     | 26 | 430747 | 1.67 | 0.09 | 5  |
| 10 F25H5.4 | STLTDSLVS            | 53 | 5312   | 1.68 | 0.07 | 4  |
| 10 F25H5.4 | GVQYLNEIK            | 61 | 14852  | 1.69 | 0.06 | 4  |
| 10 F25H5.4 | GVQYLNEIK            | 77 | 15884  | 1.69 | 0.08 | 5  |
| 22 F25H5.4 | QFAEMYAGK            | 43 | 14220  | 1.70 | 0.15 | 9  |
| 22 F25H5.4 | QFAEMYAGK            | 73 | 12464  | 1.70 | 0.13 | 8  |
| 7 F25H5.4  | YRMEMLYEGPHDDEAAVAIK | 36 | 4435   | 1.71 | 0.18 | 10 |
| 22 F25H5.4 | RNIRNMSVIAHVDHGK     | 19 | 28792  | 1.73 | 0.15 | 9  |
| 1 F25H5.4  | RNIRNMSVIAHVDHGK     | 10 | 21269  | 1.75 | 0.13 | 7  |
| 22 F25H5.4 | GVQYLNEIK            | 33 | 3694   | 1.76 | 0.11 | 6  |
| 1 F25H5.4  | GVQYLNEIK            | 39 | 2386   | 1.76 | 0.08 | 4  |
| 22 F25H5.4 | YRMEMLYEGPHDDEAAVAIK | 19 | 7022   | 1.80 | 0.15 | 8  |
| 10 F25H5.4 | ARIQGPNYVPGK         | 35 | 12885  | 1.81 | 0.17 | 9  |
| 1 F25H5.4  | AGIAGSK              | 19 | 2047   | 1.82 | 0.17 | 9  |
| 1 F25H5.4  | YRMEMLYEGPHDDEAAVAIK | 13 | 3774   | 1.82 | 0.19 | 10 |
| 10 F25H5.4 | GVQYLNEIK            | 17 | 1942   | 1.82 | 0.12 | 7  |
| 7 F25H5.4  | YRMEMLYEGPHDDEAAVAIK | 21 | 3870   | 1.84 | 0.08 | 4  |
| 1 F25H5.4  | GVQYLNEIK            | 48 | 4447   | 1.84 | 0.07 | 4  |
| 22 F25H5.4 | GVQYLNEIK            | 52 | 5900   | 1.84 | 0.10 | 6  |
| 22 F25H5.4 | RNIRNMSVIAHVDHGK     | 12 | 29511  | 1.86 | 0.20 | 11 |
| 10 F25H5.4 | YRMEMLYEGPHDDEAAVAIK | 18 | 4760   | 1.88 | 0.14 | 7  |
| 1 F25H5.4  | YRMEMLYEGPHDDEAAVAIK | 36 | 4001   | 1.89 | 0.14 | 7  |
| 1 F25H5.4  | YRMEMLYEGPHDDEAAVAIK | 10 | 1615   | 1.89 | 0.05 | 2  |
| 22 F25H5.4 | ARIQGPNYVPGK         | 27 | 5553   | 1.90 | 0.09 | 5  |
| 22 F25H5.4 | ARIQGPNYVPGK         | 37 | 4453   | 1.92 | 0.16 | 8  |
| 10 F25H5.4 | GRFYAFGRVFSGK        | 11 | 4071   | 1.93 | 0.23 | 12 |
| 1 F25H5.4  | STLTDSLVS            | 52 | 1307   | 1.94 | 0.32 | 17 |
| 10 F25H5.4 | VNFTVDEIRALMDRK      | 10 | 10264  | 1.94 | 0.14 | 7  |
| 1 F25H5.4  | GVQYLNEIK            | 26 | 2356   | 1.95 | 0.13 | 7  |
| 1 F25H5.4  | RNIRNMSVIAHVDHGK     | 12 | 40847  | 1.95 | 0.14 | 7  |
| 1 F25H5.4  | GVQYLNEIK            | 51 | 3986   | 1.95 | 0.10 | 5  |
| 7 F25H5.4  | GGTITTYK             | 11 | 1419   | 1.96 | 0.45 | 23 |
| 10 F25H5.4 | STLTDSLVS            | 12 | 833    | 1.97 | 0.11 | 5  |
| 1 F25H5.4  | TAALVEK              | 39 | 5519   | 2.04 | 0.08 | 4  |
| 10 F25H5.4 | GVQYLNEIK            | 58 | 15464  | 2.05 | 0.09 | 4  |
| 10 F25H5.4 | GRFYAFGRVFSGK        | 14 | 7630   | 2.12 | 0.12 | 6  |
| 7 F25H5.4  | STLTDSLVS            | 29 | 2355   | 2.14 | 0.18 | 8  |
| 22 F25H5.4 | TAALVEK              | 58 | 15778  | 2.14 | 0.06 | 3  |
| 22 F25H5.4 | GVQYLNEIK            | 35 | 3283   | 2.15 | 0.08 | 4  |
| 10 F25H5.4 | RNIRNMSVIAHVDHGK     | 11 | 5596   | 2.17 | 0.10 | 5  |
| 1 F25H5.4  | RNIRNMSVIAHVDHGK     | 28 | 11710  | 2.23 | 0.17 | 8  |
| 22 F25H5.4 | STLTDSLVS            | 14 | 1135   | 2.24 | 0.15 | 7  |
| 10 F25H5.4 | STLTDSLVS            | 22 | 1751   | 2.27 | 0.14 | 6  |
| 10 F25H5.4 | ARIQGPNYVPGK         | 31 | 8788   | 2.29 | 0.14 | 6  |
| 7 F25H5.4  | STLTDSLVS            | 38 | 2889   | 2.30 | 0.06 | 3  |
| 1 F25H5.4  | GVQYLNEIK            | 24 | 2660   | 2.30 | 0.08 | 4  |
| 7 F25H5.4  | RNIRNMSVIAHVDHGK     | 11 | 3656   | 2.32 | 0.20 | 9  |
| 10 F25H5.4 | GVQYLNEIK            | 43 | 4324   | 2.33 | 0.10 | 4  |
| 10 F25H5.4 | GVQYLNEIK            | 51 | 8366   | 2.35 | 0.13 | 6  |
| 22 F25H5.4 | NPADLPK              | 13 | 6287   | 2.41 | 0.32 | 13 |
| 10 F25H5.4 | VNFTVDEIRALMDRK      | 14 | 12467  | 2.41 | 0.14 | 6  |
| 1 F25H5.4  | GGTITTYK             | 11 | 4072   | 2.42 | 0.07 | 3  |
| 10 F25H5.4 | STLTDSLVS            | 55 | 2339   | 2.51 | 0.22 | 9  |

|             |                                |    |       |      |      |     |
|-------------|--------------------------------|----|-------|------|------|-----|
| 1 F25H5.4   | TAALVEK                        | 38 | 4682  | 2.53 | 0.11 | 4   |
| 10 F25H5.4  | GVQYLNEIK                      | 22 | 4122  | 2.55 | 0.11 | 4   |
| 10 F25H5.4  | GVQYLNEIK                      | 27 | 2710  | 2.69 | 0.11 | 4   |
| 7 F25H5.4   | ARIQGPNYVPGK                   | 14 | 2550  | 2.70 | 0.16 | 6   |
| 22 F25H5.4  | STLTDSLVS                      | 22 | 1443  | 2.75 | 0.15 | 5   |
| 10 F25H5.4  | ARIQGPNYVPGK                   | 39 | 13709 | 2.77 | 0.10 | 3   |
| 1 F25H5.4   | STLTDSLVS                      | 64 | 4688  | 2.77 | 0.15 | 5   |
| 22 F25H5.4  | GVQYLNEIK                      | 20 | 3137  | 2.79 | 0.13 | 5   |
| 10 F25H5.4  | RNIRNMSVIAHVDHGK               | 18 | 32700 | 2.82 | 0.20 | 7   |
| 22 F25H5.4  | TAALVEK                        | 53 | 10680 | 2.92 | 0.11 | 4   |
| 10 F25H5.4  | GVQYLNEIK                      | 23 | 3574  | 2.94 | 0.05 | 2   |
| 10 F25H5.4  | ARIQGPNYVPGK                   | 43 | 16138 | 2.97 | 0.15 | 5   |
| 1 F25H5.4   | STLTDSLVS                      | 57 | 3961  | 3.03 | 0.11 | 4   |
| 10 F25H5.4  | RNIRNMSVIAHVDHGK               | 10 | 64307 | 3.08 | 0.13 | 4   |
| 7 F25H5.4   | GVQYLNEIK                      | 48 | 5656  | 3.14 | 0.09 | 3   |
| 1 F25H5.4   | GVQYLNEIK                      | 31 | 4013  | 3.14 | 0.10 | 3   |
| 1 F25H5.4   | GVQYLNEIK                      | 33 | 3089  | 3.17 | 0.21 | 7   |
| 10 F25H5.4  | STLTDSLVS                      | 35 | 1312  | 3.23 | 0.20 | 6   |
| 10 F25H5.4  | RNIRNMSVIAHVDHGK               | 12 | 15906 | 3.23 | 0.19 | 6   |
| 10 F25H5.4  | RNIRNMSVIAHVDHGK               | 12 | 22870 | 3.35 | 0.13 | 4   |
| 10 F25H5.4  | STLTDSLVS                      | 46 | 3885  | 3.46 | 0.10 | 3   |
| 10 F25H5.4  | GVQYLNEIK                      | 34 | 6320  | 3.56 | 0.16 | 5   |
| 10 F25H5.4  | HNRLHCTAQMPDGLADDIEGGTVNARDEFK | 11 | 2858  | 3.66 | 0.13 | 4   |
| 10 F25H5.4  | GVQYLNEIK                      | 18 | 1503  | 3.81 | 0.15 | 4   |
| 10 F25H5.4  | STLTDSLVS                      | 64 | 4233  | 3.81 | 0.09 | 2   |
| 7 F25H5.4   | GVQYLNEIK                      | 46 | 4720  | 3.93 | 0.12 | 3   |
| 10 F25H5.4  | GVQYLNEIK                      | 20 | 1867  | 3.95 | 0.26 | 7   |
| 10 F25H5.4  | GVQYLNEIK                      | 22 | 1607  | 5.30 | 0.19 | 4   |
| 1 F25H5.4   | DLEGKPLMK                      | 17 | 8694  | 6.07 | 0.27 | 4   |
| 10 F25H5.4  | GVQYLNEIK                      | 18 | 1506  | 6.19 | 0.18 | 3   |
| 10 F25H5.4  | STLTDSLVS                      | 25 | 1628  | 6.49 | 0.22 | 3   |
| 10 F25H5.4  | STLTDSLVS                      | 13 | 3049  | 9.39 | 0.54 | 6   |
| 7 F26D10.3  | VISAEGAKPK                     | 68 | 19158 | 0.16 | 0.36 | 219 |
| 7 F26D10.3  | LLSDFSGK                       | 53 | 1620  | 0.17 | 0.59 | 349 |
| 22 F26D10.3 | VISAEGAKPK                     | 43 | 12533 | 0.24 | 0.52 | 214 |
| 1 F26D10.3  | RNTTIPTK                       | 17 | 252   | 0.25 | 0.11 | 45  |
| 1 F26D10.3  | RNTTIPTK                       | 15 | 326   | 0.27 | 0.22 | 82  |
| 22 F26D10.3 | IFTPEEISSMVLLK                 | 29 | 1450  | 0.27 | 0.28 | 103 |
| 7 F26D10.3  | DDIERMVNEAEK                   | 23 | 3247  | 0.27 | 0.20 | 72  |
| 7 F26D10.3  | ETAEAFLGTTVK                   | 65 | 4064  | 0.30 | 0.25 | 82  |
| 7 F26D10.3  | IFTPEEISSMVLLK                 | 58 | 1359  | 0.30 | 0.21 | 70  |
| 22 F26D10.3 | LLSDFSGK                       | 39 | 862   | 0.31 | 0.20 | 65  |
| 7 F26D10.3  | VISAEGAKPK                     | 49 | 4109  | 0.32 | 0.42 | 131 |
| 22 F26D10.3 | LLSDFSGK                       | 45 | 1206  | 0.32 | 0.23 | 72  |
| 7 F26D10.3  | IFTPEEISSMVLLK                 | 55 | 2057  | 0.32 | 0.17 | 53  |
| 7 F26D10.3  | LLSDFSGK                       | 69 | 5295  | 0.34 | 0.07 | 22  |
| 22 F26D10.3 | DDIERMVNEAEK                   | 34 | 3583  | 0.35 | 0.11 | 31  |
| 7 F26D10.3  | VISAEGAKPK                     | 54 | 5103  | 0.36 | 0.19 | 53  |
| 7 F26D10.3  | ETAEAFLGTTVK                   | 49 | 3274  | 0.36 | 0.20 | 55  |
| 22 F26D10.3 | IFTPEEISSMVLLK                 | 50 | 1056  | 0.37 | 0.07 | 19  |
| 1 F26D10.3  | LLSDFSGK                       | 14 | 300   | 0.37 | 0.21 | 58  |
| 7 F26D10.3  | LLSDFSGK                       | 41 | 521   | 0.37 | 0.08 | 22  |
| 1 F26D10.3  | ETAEAFLGTTVK                   | 59 | 1841  | 0.38 | 0.17 | 44  |
| 1 F26D10.3  | ETAEAFLGTTVK                   | 36 | 1555  | 0.39 | 0.15 | 39  |
| 7 F26D10.3  | LLSDFSGK                       | 36 | 1355  | 0.39 | 0.16 | 40  |
| 22 F26D10.3 | FDDPAVQSDMK                    | 22 | 5307  | 0.39 | 0.23 | 59  |
| 7 F26D10.3  | LLSDFSGK                       | 67 | 2338  | 0.40 | 0.12 | 30  |
| 22 F26D10.3 | DDIERMVNEAEK                   | 27 | 3073  | 0.40 | 0.12 | 31  |
| 7 F26D10.3  | LLSDFSGK                       | 41 | 761   | 0.41 | 0.16 | 38  |
| 22 F26D10.3 | IFTPEEISSMVLLK                 | 23 | 707   | 0.41 | 0.16 | 38  |
| 22 F26D10.3 | NGLESYAFNLK                    | 23 | 1017  | 0.41 | 0.19 | 46  |
| 22 F26D10.3 | DDIERMVNEAEK                   | 45 | 2501  | 0.42 | 0.23 | 55  |
| 7 F26D10.3  | VISAEGAKPK                     | 20 | 2682  | 0.42 | 0.29 | 68  |
| 7 F26D10.3  | IFTPEEISSMVLLK                 | 66 | 3501  | 0.42 | 0.15 | 37  |
| 7 F26D10.3  | DDIERMVNEAEK                   | 27 | 2598  | 0.43 | 0.29 | 68  |
| 22 F26D10.3 | SQVHDIVLVGGSTRIPK              | 28 | 6923  | 0.43 | 0.26 | 61  |
| 7 F26D10.3  | NGLESYAFNLK                    | 63 | 2953  | 0.43 | 0.14 | 32  |
| 7 F26D10.3  | DDIERMVNEAEK                   | 22 | 3804  | 0.43 | 0.32 | 73  |
| 22 F26D10.3 | ETAEAFLGTTVK                   | 22 | 1832  | 0.44 | 0.15 | 35  |
| 22 F26D10.3 | IFTPEEISSMVLLK                 | 54 | 1158  | 0.44 | 0.26 | 59  |
| 7 F26D10.3  | LLSDFSGK                       | 67 | 3645  | 0.44 | 0.09 | 21  |
| 7 F26D10.3  | NGLESYAFNLK                    | 48 | 1705  | 0.44 | 0.14 | 31  |
| 7 F26D10.3  | DAVVTVPAYFNDSQRQATK            | 19 | 1520  | 0.45 | 0.22 | 49  |
| 22 F26D10.3 | IFTPEEISSMVLLK                 | 81 | 3551  | 0.45 | 0.17 | 38  |
| 22 F26D10.3 | LLSDFSGK                       | 39 | 1577  | 0.45 | 0.18 | 39  |
| 7 F26D10.3  | NGLESYAFNLK                    | 64 | 3509  | 0.45 | 0.16 | 36  |
| 7 F26D10.3  | IFTPEEISSMVLLK                 | 69 | 1262  | 0.45 | 0.19 | 43  |
| 1 F26D10.3  | DDIERMVNEAEK                   | 16 | 3618  | 0.45 | 0.19 | 42  |
| 1 F26D10.3  | LLSDFSGK                       | 50 | 1283  | 0.45 | 0.08 | 18  |
| 22 F26D10.3 | LLSDFSGK                       | 32 | 1145  | 0.46 | 0.18 | 39  |
| 7 F26D10.3  | LLSDFSGK                       | 20 | 1249  | 0.46 | 0.10 | 22  |
| 1 F26D10.3  | DDIERMVNEAEK                   | 15 | 2708  | 0.47 | 0.15 | 31  |
| 7 F26D10.3  | NGLESYAFNLK                    | 22 | 1157  | 0.47 | 0.10 | 20  |
| 22 F26D10.3 | LLSDFSGK                       | 47 | 1256  | 0.48 | 0.30 | 63  |
| 22 F26D10.3 | IFTPEEISSMVLLK                 | 71 | 3400  | 0.49 | 0.26 | 54  |
| 7 F26D10.3  | VISAEGAKPK                     | 47 | 10364 | 0.49 | 0.21 | 43  |
| 7 F26D10.3  | IFTPEEISSMVLLK                 | 79 | 3025  | 0.49 | 0.09 | 18  |
| 22 F26D10.3 | NQVAMNPHNTVFDAK                | 58 | 4864  | 0.49 | 0.10 | 20  |
| 7 F26D10.3  | DDIERMVNEAEK                   | 27 | 4960  | 0.50 | 0.16 | 32  |
| 1 F26D10.3  | LLSDFSGK                       | 64 | 1316  | 0.50 | 0.20 | 40  |
| 22 F26D10.3 | DAVVTVPAYFNDSQRQATK            | 41 | 4387  | 0.51 | 0.16 | 32  |
| 1 F26D10.3  | LLSDFSGK                       | 34 | 911   | 0.51 | 0.18 | 35  |
| 7 F26D10.3  | SQVHDIVLVGGSTRIPK              | 29 | 43573 | 0.51 | 0.25 | 49  |
| 1 F26D10.3  | DDIERMVNEAEK                   | 31 | 3655  | 0.51 | 0.14 | 26  |
| 22 F26D10.3 | LLSDFSGK                       | 44 | 1779  | 0.52 | 0.20 | 39  |
| 1 F26D10.3  | DAVVTVPAYFNDSQRQATK            | 13 | 1644  | 0.52 | 0.15 | 29  |
| 1 F26D10.3  | DDIERMVNEAEK                   | 15 | 2689  | 0.52 | 0.09 | 18  |
| 1 F26D10.3  | DLEGLANPIISK                   | 18 | 918   | 0.53 | 0.30 | 57  |
| 22 F26D10.3 | ETAEAFLGTTVK                   | 51 | 8296  | 0.53 | 0.24 | 44  |
| 22 F26D10.3 | NQVAMNPHNTVFDAK                | 78 | 7746  | 0.53 | 0.13 | 25  |
| 7 F26D10.3  | NGLESYAFNLK                    | 18 | 1198  | 0.54 | 0.12 | 23  |

|             |                         |     |       |      |      |     |
|-------------|-------------------------|-----|-------|------|------|-----|
| 22 F26D10.3 | IFTPEEISSMVLLK          | 40  | 1196  | 0.54 | 0.23 | 42  |
| 22 F26D10.3 | DDIERMVNEAEK            | 33  | 9435  | 0.54 | 0.09 | 17  |
| 22 F26D10.3 | DDIERMVNEAEK            | 38  | 5503  | 0.54 | 0.09 | 16  |
| 22 F26D10.3 | IFTPEEISSMVLLK          | 20  | 829   | 0.54 | 0.24 | 44  |
| 7 F26D10.3  | ETAEAFLGTTVK            | 64  | 2472  | 0.55 | 0.20 | 37  |
| 22 F26D10.3 | SQVHDIVLVGGSTRIPK       | 18  | 5960  | 0.55 | 0.26 | 47  |
| 7 F26D10.3  | IFTPEEISSMVLLK          | 67  | 2608  | 0.55 | 0.12 | 22  |
| 7 F26D10.3  | IFTPEEISSMVLLK          | 53  | 2008  | 0.55 | 0.14 | 25  |
| 22 F26D10.3 | DLEGLANPIISK            | 77  | 14391 | 0.55 | 0.13 | 24  |
| 22 F26D10.3 | ETAEAFLGTTVK            | 39  | 2525  | 0.55 | 0.10 | 18  |
| 7 F26D10.3  | LLSDFSGK                | 26  | 653   | 0.55 | 0.10 | 17  |
| 7 F26D10.3  | IFTPEEISSMVLLK          | 35  | 1284  | 0.55 | 0.06 | 12  |
| 7 F26D10.3  | NGLESYAFNLK             | 72  | 10567 | 0.56 | 0.07 | 12  |
| 7 F26D10.3  | NGLESYAFNLK             | 44  | 2370  | 0.56 | 0.22 | 39  |
| 22 F26D10.3 | LLSDFSGK                | 27  | 1001  | 0.56 | 0.21 | 37  |
| 22 F26D10.3 | IFTPEEISSMVLLK          | 80  | 3030  | 0.57 | 0.16 | 29  |
| 7 F26D10.3  | VISAEGAKPK              | 41  | 5530  | 0.57 | 0.27 | 47  |
| 1 F26D10.3  | DDIERMVNEAEK            | 20  | 3238  | 0.58 | 0.19 | 34  |
| 7 F26D10.3  | VISAEGAKPK              | 42  | 2296  | 0.58 | 0.34 | 58  |
| 7 F26D10.3  | NGLESYAFNLK             | 60  | 8543  | 0.59 | 0.08 | 13  |
| 7 F26D10.3  | SQVHDIVLVGGSTRIPK       | 27  | 12014 | 0.59 | 0.18 | 31  |
| 1 F26D10.3  | DAVVTVPAYFNDSQRQATK     | 12  | 1817  | 0.59 | 0.15 | 26  |
| 7 F26D10.3  | DLEGLANPIISK            | 16  | 1088  | 0.59 | 0.19 | 32  |
| 22 F26D10.3 | LLSDFSGK                | 26  | 688   | 0.59 | 0.10 | 16  |
| 22 F26D10.3 | LLSDFSGK                | 19  | 528   | 0.59 | 0.14 | 24  |
| 1 F26D10.3  | DLEGLANPIISK            | 26  | 1321  | 0.59 | 0.12 | 20  |
| 1 F26D10.3  | DAVVTVPAYFNDSQRQATK     | 12  | 3194  | 0.59 | 0.05 | 8   |
| 22 F26D10.3 | LLSDFSGK                | 37  | 1221  | 0.59 | 0.25 | 42  |
| 22 F26D10.3 | DDIERMVNEAEK            | 21  | 3225  | 0.59 | 0.20 | 34  |
| 22 F26D10.3 | LLSDFSGK                | 39  | 1444  | 0.60 | 0.19 | 32  |
| 22 F26D10.3 | DLEGLANPIISK            | 70  | 13391 | 0.60 | 0.20 | 34  |
| 22 F26D10.3 | DAVVTVPAYFNDSQRQATK     | 16  | 8884  | 0.60 | 0.21 | 35  |
| 7 F26D10.3  | LLSDFSGK                | 10  | 972   | 0.60 | 0.06 | 10  |
| 22 F26D10.3 | SQVHDIVLVGGSTRIPK       | 17  | 5494  | 0.61 | 0.17 | 28  |
| 1 F26D10.3  | LLSDFSGK                | 27  | 384   | 0.62 | 0.15 | 24  |
| 7 F26D10.3  | SQVHDIVLVGGSTRIPK       | 22  | 7889  | 0.62 | 0.15 | 24  |
| 22 F26D10.3 | DDIERMVNEAEK            | 33  | 5590  | 0.62 | 0.18 | 28  |
| 22 F26D10.3 | DDIERMVNEAEK            | 40  | 6662  | 0.62 | 0.18 | 30  |
| 22 F26D10.3 | NGLESYAFNLK             | 27  | 2811  | 0.62 | 0.13 | 21  |
| 22 F26D10.3 | NGLESYAFNLK             | 93  | 7519  | 0.62 | 0.16 | 26  |
| 7 F26D10.3  | DLEGLANPIISK            | 39  | 1596  | 0.62 | 0.17 | 27  |
| 7 F26D10.3  | ETAEAFLGTTVK            | 18  | 942   | 0.62 | 0.24 | 38  |
| 22 F26D10.3 | IFTPEEISSMVLLK          | 82  | 1500  | 0.63 | 0.12 | 19  |
| 7 F26D10.3  | ETAEAFLGTTVK            | 53  | 3242  | 0.63 | 0.14 | 23  |
| 22 F26D10.3 | WLDSNQTAEK              | 53  | 14914 | 0.63 | 0.16 | 25  |
| 1 F26D10.3  | LLSDFSGK                | 26  | 600   | 0.63 | 0.11 | 18  |
| 7 F26D10.3  | LLSDFSGK                | 29  | 717   | 0.63 | 0.13 | 21  |
| 1 F26D10.3  | NGLESYAFNLK             | 83  | 3323  | 0.63 | 0.17 | 27  |
| 22 F26D10.3 | SQVHDIVLVGGSTRIPK       | 24  | 10143 | 0.63 | 0.26 | 41  |
| 22 F26D10.3 | ETAEAFLGTTVK            | 101 | 26716 | 0.63 | 0.06 | 10  |
| 1 F26D10.3  | DAVVTVPAYFNDSQRQATK     | 12  | 7024  | 0.63 | 0.17 | 28  |
| 7 F26D10.3  | SQVHDIVLVGGSTRIPK       | 24  | 10533 | 0.63 | 0.15 | 24  |
| 22 F26D10.3 | WLDSNQTAEK              | 53  | 20059 | 0.64 | 0.13 | 21  |
| 22 F26D10.3 | DDIERMVNEAEK            | 24  | 4144  | 0.64 | 0.20 | 31  |
| 1 F26D10.3  | DDIERMVNEAEK            | 19  | 2905  | 0.64 | 0.22 | 34  |
| 1 F26D10.3  | DLEGLANPIISK            | 29  | 1011  | 0.64 | 0.16 | 25  |
| 7 F26D10.3  | LLSDFSGK                | 36  | 622   | 0.64 | 0.14 | 21  |
| 7 F26D10.3  | LLSDFSGK                | 77  | 3840  | 0.64 | 0.24 | 38  |
| 1 F26D10.3  | NGLESYAFNLK             | 18  | 768   | 0.65 | 0.19 | 30  |
| 22 F26D10.3 | SINPDEAVAYGAAVQAAILSGDK | 34  | 2416  | 0.65 | 0.08 | 12  |
| 22 F26D10.3 | VISAEGAKPK              | 45  | 22352 | 0.65 | 0.67 | 103 |
| 22 F26D10.3 | NGLESYAFNLK             | 55  | 4701  | 0.65 | 0.19 | 29  |
| 22 F26D10.3 | IFTPEEISSMVLLK          | 52  | 2288  | 0.65 | 0.09 | 14  |
| 22 F26D10.3 | RNTTIPTK                | 17  | 1260  | 0.66 | 0.19 | 29  |
| 1 F26D10.3  | NQVAMNPHNTVFDK          | 37  | 1378  | 0.66 | 0.17 | 25  |
| 7 F26D10.3  | NGLESYAFNLK             | 36  | 1265  | 0.66 | 0.14 | 21  |
| 1 F26D10.3  | DAVVTVPAYFNDSQRQATK     | 11  | 14502 | 0.66 | 0.12 | 19  |
| 22 F26D10.3 | ETAEAFLGTTVK            | 89  | 41589 | 0.66 | 0.10 | 16  |
| 22 F26D10.3 | DAVVTVPAYFNDSQRQATK     | 32  | 7959  | 0.66 | 0.16 | 23  |
| 7 F26D10.3  | NQVAMNPHNTVFDK          | 71  | 2975  | 0.67 | 0.10 | 15  |
| 7 F26D10.3  | SQVHDIVLVGGSTRIPK       | 38  | 46508 | 0.67 | 0.15 | 22  |
| 7 F26D10.3  | DLEGLANPIISK            | 15  | 636   | 0.67 | 0.09 | 14  |
| 7 F26D10.3  | SQVHDIVLVGGSTRIPK       | 27  | 4642  | 0.67 | 0.19 | 28  |
| 7 F26D10.3  | SQVHDIVLVGGSTRIPK       | 17  | 3831  | 0.68 | 0.14 | 21  |
| 7 F26D10.3  | VISAEGAKPK              | 37  | 2608  | 0.68 | 0.60 | 89  |
| 22 F26D10.3 | DDIERMVNEAEK            | 23  | 4143  | 0.68 | 0.29 | 42  |
| 1 F26D10.3  | SQVHDIVLVGGSTRIPK       | 28  | 31516 | 0.68 | 0.14 | 20  |
| 22 F26D10.3 | NGLESYAFNLK             | 59  | 7633  | 0.69 | 0.19 | 28  |
| 1 F26D10.3  | LLSDFSGK                | 37  | 431   | 0.69 | 0.36 | 52  |
| 22 F26D10.3 | DDIERMVNEAEK            | 37  | 3679  | 0.69 | 0.24 | 35  |
| 22 F26D10.3 | LLSDFSGK                | 43  | 1564  | 0.69 | 0.09 | 13  |
| 22 F26D10.3 | IFTPEEISSMVLLK          | 28  | 797   | 0.69 | 0.09 | 13  |
| 1 F26D10.3  | NGLESYAFNLK             | 96  | 7825  | 0.70 | 0.12 | 17  |
| 22 F26D10.3 | NGLESYAFNLK             | 77  | 3273  | 0.70 | 0.10 | 14  |
| 22 F26D10.3 | IFTPEEISSMVLLK          | 86  | 4788  | 0.70 | 0.16 | 23  |
| 22 F26D10.3 | IFTPEEISSMVLLK          | 92  | 30641 | 0.70 | 0.13 | 18  |
| 7 F26D10.3  | NQVAMNPHNTVFDK          | 17  | 7515  | 0.70 | 0.15 | 21  |
| 22 F26D10.3 | ETAEAFLGTTVK            | 25  | 5397  | 0.71 | 0.18 | 25  |
| 1 F26D10.3  | DAVVTVPAYFNDSQRQATK     | 37  | 2062  | 0.71 | 0.29 | 42  |
| 1 F26D10.3  | LLSDFSGK                | 19  | 464   | 0.71 | 0.12 | 17  |
| 7 F26D10.3  | LLSDFSGK                | 12  | 1017  | 0.71 | 0.06 | 9   |
| 1 F26D10.3  | NQVAMNPHNTVFDK          | 60  | 1641  | 0.71 | 0.20 | 29  |
| 1 F26D10.3  | ETAEAFLGTTVK            | 67  | 3005  | 0.71 | 0.07 | 9   |
| 7 F26D10.3  | VISAEGAKPK              | 45  | 2917  | 0.71 | 0.16 | 22  |
| 7 F26D10.3  | LLSDFSGK                | 15  | 625   | 0.72 | 0.19 | 26  |
| 22 F26D10.3 | DAVVTVPAYFNDSQRQATK     | 32  | 7366  | 0.72 | 0.11 | 15  |
| 22 F26D10.3 | LLSDFSGK                | 45  | 874   | 0.73 | 0.20 | 27  |
| 22 F26D10.3 | FDDPAVQSDMK             | 14  | 1575  | 0.73 | 0.08 | 11  |
| 22 F26D10.3 | DDIERMVNEAEK            | 16  | 3071  | 0.73 | 0.23 | 31  |
| 22 F26D10.3 | VISAEGAKPK              | 30  | 14454 | 0.73 | 0.48 | 66  |
| 22 F26D10.3 | NGLESYAFNLK             | 46  | 1604  | 0.73 | 0.15 | 20  |

|             |                              |    |       |      |      |    |
|-------------|------------------------------|----|-------|------|------|----|
| 7 F26D10.3  | IFTPEEISSMVLLK               | 30 | 1164  | 0.73 | 0.10 | 14 |
| 7 F26D10.3  | NQVAMNPHNTVFDAK              | 49 | 2337  | 0.74 | 0.18 | 24 |
| 1 F26D10.3  | ETAEAFLGTTVK                 | 47 | 2786  | 0.74 | 0.13 | 17 |
| 22 F26D10.3 | SQVHDIVLVGGSTRIPK            | 10 | 1912  | 0.74 | 0.19 | 26 |
| 7 F26D10.3  | SQVHDIVLVGGSTRIPK            | 27 | 31055 | 0.74 | 0.15 | 21 |
| 22 F26D10.3 | VQVEYK                       | 11 | 2125  | 0.74 | 0.41 | 56 |
| 1 F26D10.3  | DDIERMVNEAEK                 | 13 | 3441  | 0.74 | 0.17 | 23 |
| 7 F26D10.3  | LLSDFSGK                     | 54 | 2074  | 0.74 | 0.15 | 21 |
| 7 F26D10.3  | LLSDFSGK                     | 39 | 1114  | 0.74 | 0.10 | 13 |
| 1 F26D10.3  | SQVHDIVLVGGSTRIPK            | 15 | 1977  | 0.75 | 0.27 | 36 |
| 22 F26D10.3 | SQVHDIVLVGGSTRIPK            | 23 | 3361  | 0.75 | 0.16 | 21 |
| 7 F26D10.3  | IFTPEEISSMVLLK               | 45 | 1194  | 0.75 | 0.18 | 24 |
| 22 F26D10.3 | NGLESYAFNLK                  | 42 | 1648  | 0.75 | 0.18 | 24 |
| 1 F26D10.3  | NGLESYAFNLK                  | 79 | 2920  | 0.75 | 0.13 | 17 |
| 22 F26D10.3 | IFTPEEISSMVLLK               | 46 | 1486  | 0.75 | 0.12 | 16 |
| 22 F26D10.3 | LLSDFSGK                     | 61 | 1780  | 0.76 | 0.10 | 13 |
| 22 F26D10.3 | NQVAMNPHNTVFDAK              | 98 | 31908 | 0.76 | 0.19 | 25 |
| 7 F26D10.3  | LLSDFSGK                     | 43 | 1426  | 0.77 | 0.17 | 22 |
| 1 F26D10.3  | LLSDFSGK                     | 33 | 499   | 0.77 | 0.22 | 28 |
| 7 F26D10.3  | SQVHDIVLVGGSTRIPK            | 18 | 5815  | 0.77 | 0.06 | 8  |
| 22 F26D10.3 | IFTPEEISSMVLLK               | 90 | 35344 | 0.77 | 0.10 | 13 |
| 22 F26D10.3 | LLSDFSGK                     | 31 | 1075  | 0.77 | 0.15 | 20 |
| 22 F26D10.3 | NQVAMNPHNTVFDAK              | 93 | 25253 | 0.77 | 0.09 | 11 |
| 1 F26D10.3  | NQVAMNPHNTVFDAK              | 58 | 2272  | 0.78 | 0.12 | 15 |
| 1 F26D10.3  | NGLESYAFNLK                  | 88 | 2505  | 0.78 | 0.13 | 17 |
| 22 F26D10.3 | DDIERMVNEAEK                 | 14 | 3174  | 0.78 | 0.21 | 27 |
| 1 F26D10.3  | NQVAMNPHNTVFDAK              | 62 | 5378  | 0.78 | 0.08 | 10 |
| 22 F26D10.3 | LLSDFSGK                     | 40 | 1186  | 0.78 | 0.23 | 30 |
| 1 F26D10.3  | ETAEAFLGTTVK                 | 67 | 3198  | 0.78 | 0.15 | 19 |
| 22 F26D10.3 | SINPDEAVAYGAAVQAAILSGDK      | 25 | 2122  | 0.79 | 0.18 | 23 |
| 1 F26D10.3  | ETAEAFLGTTVK                 | 46 | 2916  | 0.79 | 0.16 | 21 |
| 22 F26D10.3 | LLSDFSGK                     | 45 | 1186  | 0.79 | 0.13 | 16 |
| 22 F26D10.3 | LLSDFSGK                     | 44 | 1518  | 0.79 | 0.11 | 14 |
| 22 F26D10.3 | LLSDFSGK                     | 93 | 43595 | 0.80 | 0.04 | 5  |
| 22 F26D10.3 | LLSDFSGK                     | 32 | 965   | 0.80 | 0.14 | 18 |
| 7 F26D10.3  | LLSDFSGK                     | 42 | 1405  | 0.80 | 0.08 | 10 |
| 1 F26D10.3  | WLDSNQTAEK                   | 42 | 1898  | 0.80 | 0.21 | 26 |
| 1 F26D10.3  | LLSDFSGK                     | 13 | 327   | 0.80 | 0.27 | 34 |
| 1 F26D10.3  | DAVVTVPAYFNDSQRQATK          | 29 | 3907  | 0.80 | 0.09 | 11 |
| 22 F26D10.3 | ETAEAFLGTTVK                 | 52 | 2596  | 0.80 | 0.19 | 24 |
| 22 F26D10.3 | LLSDFSGK                     | 96 | 50543 | 0.80 | 0.10 | 12 |
| 22 F26D10.3 | VISAEGAKPK                   | 48 | 12858 | 0.81 | 0.67 | 83 |
| 7 F26D10.3  | NQVAMNPHNTVFDAK              | 60 | 3195  | 0.81 | 0.18 | 22 |
| 7 F26D10.3  | SQVHDIVLVGGSTRIPK            | 11 | 5975  | 0.82 | 0.10 | 13 |
| 22 F26D10.3 | IFTPEEISSMVLLK               | 54 | 1297  | 0.82 | 0.08 | 10 |
| 1 F26D10.3  | DAVVTVPAYFNDSQRQATK          | 14 | 2519  | 0.82 | 0.14 | 17 |
| 1 F26D10.3  | LLSDFSGK                     | 87 | 3966  | 0.82 | 0.08 | 10 |
| 22 F26D10.3 | NQVAMNPHNTVFDAK              | 17 | 12433 | 0.82 | 0.24 | 29 |
| 22 F26D10.3 | LLSDFSGK                     | 96 | 12318 | 0.82 | 0.09 | 11 |
| 1 F26D10.3  | VISAEGAKPK                   | 27 | 8664  | 0.82 | 0.49 | 59 |
| 1 F26D10.3  | LLSDFSGK                     | 87 | 4831  | 0.82 | 0.14 | 17 |
| 7 F26D10.3  | NQVAMNPHNTVFDAK              | 51 | 3053  | 0.82 | 0.12 | 15 |
| 1 F26D10.3  | NGLESYAFNLK                  | 93 | 6549  | 0.83 | 0.11 | 13 |
| 1 F26D10.3  | DLEGLANPIISK                 | 70 | 2259  | 0.83 | 0.15 | 18 |
| 1 F26D10.3  | IFTPEEISSMVLLK               | 34 | 583   | 0.83 | 0.05 | 6  |
| 7 F26D10.3  | NGLESYAFNLK                  | 78 | 2444  | 0.83 | 0.10 | 12 |
| 22 F26D10.3 | IFTPEEISSMVLLK               | 34 | 602   | 0.83 | 0.21 | 25 |
| 1 F26D10.3  | DLEGLANPIISK                 | 50 | 3164  | 0.83 | 0.09 | 11 |
| 1 F26D10.3  | DLEGLANPIISK                 | 40 | 982   | 0.83 | 0.13 | 16 |
| 7 F26D10.3  | NQVAMNPHNTVFDAK              | 82 | 4061  | 0.84 | 0.07 | 9  |
| 7 F26D10.3  | VISAEGAKPK                   | 32 | 18528 | 0.84 | 0.43 | 51 |
| 7 F26D10.3  | LLSDFSGK                     | 13 | 1549  | 0.84 | 0.31 | 38 |
| 1 F26D10.3  | ETAEAFLGTTVK                 | 20 | 1571  | 0.84 | 0.19 | 23 |
| 22 F26D10.3 | IFTPEEISSMVLLK               | 85 | 8274  | 0.84 | 0.12 | 15 |
| 22 F26D10.3 | TAQTFTTYSDNQPGVLIQVYEGERAMTK | 40 | 8716  | 0.84 | 0.05 | 6  |
| 7 F26D10.3  | SQVHDIVLVGGSTRIPK            | 11 | 6507  | 0.84 | 0.14 | 17 |
| 1 F26D10.3  | NGLESYAFNLK                  | 56 | 2967  | 0.84 | 0.11 | 14 |
| 1 F26D10.3  | SQVHDIVLVGGSTRIPK            | 14 | 6706  | 0.84 | 0.13 | 16 |
| 1 F26D10.3  | DDIERMVNEAEK                 | 24 | 2434  | 0.84 | 0.09 | 11 |
| 22 F26D10.3 | IFTPEEISSMVLLK               | 31 | 707   | 0.84 | 0.16 | 18 |
| 1 F26D10.3  | DAVVTVPAYFNDSQRQATK          | 38 | 3804  | 0.84 | 0.15 | 17 |
| 7 F26D10.3  | IFTPEEISSMVLLK               | 33 | 1513  | 0.85 | 0.20 | 23 |
| 1 F26D10.3  | SQVHDIVLVGGSTRIPK            | 58 | 32595 | 0.85 | 0.13 | 15 |
| 22 F26D10.3 | DLEGLANPIISK                 | 68 | 42519 | 0.85 | 0.08 | 10 |
| 7 F26D10.3  | NQVAMNPHNTVFDAK              | 73 | 3359  | 0.85 | 0.14 | 16 |
| 22 F26D10.3 | VQVEYK                       | 12 | 2079  | 0.85 | 0.28 | 33 |
| 1 F26D10.3  | WLDSNQTAEK                   | 37 | 2102  | 0.85 | 0.19 | 23 |
| 1 F26D10.3  | NQVAMNPHNTVFDAK              | 67 | 8349  | 0.85 | 0.20 | 24 |
| 7 F26D10.3  | VISAEGAKPK                   | 40 | 9747  | 0.85 | 0.13 | 16 |
| 22 F26D10.3 | SQVHDIVLVGGSTRIPK            | 13 | 4660  | 0.86 | 0.12 | 14 |
| 22 F26D10.3 | NQVAMNPHNTVFDAK              | 65 | 5785  | 0.86 | 0.16 | 19 |
| 7 F26D10.3  | SQVHDIVLVGGSTRIPK            | 24 | 12704 | 0.86 | 0.12 | 14 |
| 1 F26D10.3  | SQVHDIVLVGGSTRIPK            | 16 | 5819  | 0.87 | 0.16 | 18 |
| 22 F26D10.3 | IFTPEEISSMVLLK               | 51 | 1293  | 0.87 | 0.17 | 20 |
| 7 F26D10.3  | NQVAMNPHNTVFDAK              | 70 | 3329  | 0.87 | 0.11 | 13 |
| 7 F26D10.3  | NQVAMNPHNTVFDAK              | 11 | 10374 | 0.88 | 0.23 | 27 |
| 22 F26D10.3 | SQVHDIVLVGGSTRIPK            | 11 | 24387 | 0.88 | 0.13 | 15 |
| 1 F26D10.3  | SQVHDIVLVGGSTRIPK            | 43 | 2099  | 0.88 | 0.12 | 13 |
| 1 F26D10.3  | SQVHDIVLVGGSTRIPK            | 28 | 9777  | 0.88 | 0.08 | 9  |
| 1 F26D10.3  | NGLESYAFNLK                  | 75 | 2058  | 0.88 | 0.14 | 16 |
| 1 F26D10.3  | RNTTIPTK                     | 12 | 855   | 0.89 | 0.18 | 21 |
| 7 F26D10.3  | NQVAMNPHNTVFDAK              | 79 | 4669  | 0.89 | 0.10 | 12 |
| 22 F26D10.3 | RNTTIPTK                     | 14 | 6874  | 0.89 | 0.08 | 9  |
| 22 F26D10.3 | RNTTIPTK                     | 28 | 1849  | 0.89 | 0.09 | 10 |
| 7 F26D10.3  | VISAEGAKPK                   | 42 | 1924  | 0.90 | 0.37 | 41 |
| 22 F26D10.3 | RNTTIPTK                     | 26 | 2556  | 0.90 | 0.05 | 6  |
| 22 F26D10.3 | LLSDFSGK                     | 82 | 13596 | 0.91 | 0.09 | 10 |
| 7 F26D10.3  | ETAEAFLGTTVK                 | 31 | 2238  | 0.91 | 0.16 | 17 |
| 7 F26D10.3  | SQVHDIVLVGGSTRIPK            | 11 | 3963  | 0.91 | 0.15 | 16 |
| 7 F26D10.3  | SQVHDIVLVGGSTRIPK            | 11 | 7451  | 0.91 | 0.08 | 9  |
| 22 F26D10.3 | IFTPEEISSMVLLK               | 47 | 1794  | 0.91 | 0.22 | 24 |

|             |                         |     |        |      |      |    |
|-------------|-------------------------|-----|--------|------|------|----|
| 1 F26D10.3  | NGLESYAFNLK             | 39  | 1134   | 0.91 | 0.15 | 16 |
| 22 F26D10.3 | VISAEGAKPK              | 41  | 33219  | 0.91 | 0.08 | 8  |
| 7 F26D10.3  | VISAEGAKPK              | 40  | 5252   | 0.91 | 0.15 | 17 |
| 22 F26D10.3 | SQVHDIVLVGGSTRIPK       | 23  | 6869   | 0.91 | 0.23 | 25 |
| 1 F26D10.3  | NQVAMNPHNTVFDAK         | 32  | 1729   | 0.92 | 0.17 | 18 |
| 22 F26D10.3 | IFTPEEISSMVLK           | 34  | 574    | 0.92 | 0.11 | 12 |
| 1 F26D10.3  | SQVHDIVLVGGSTRIPK       | 26  | 15256  | 0.92 | 0.08 | 8  |
| 22 F26D10.3 | DAVVTVPAYFNDSQRQATK     | 13  | 46378  | 0.92 | 0.06 | 7  |
| 22 F26D10.3 | LLSDFSGK                | 15  | 685    | 0.92 | 0.22 | 24 |
| 1 F26D10.3  | ETAEAFLGTTVK            | 45  | 1926   | 0.92 | 0.11 | 12 |
| 22 F26D10.3 | DLEGLANPIISK            | 73  | 50953  | 0.92 | 0.09 | 10 |
| 22 F26D10.3 | SQVHDIVLVGGSTRIPK       | 36  | 144353 | 0.92 | 0.10 | 10 |
| 1 F26D10.3  | DLEGLANPIISK            | 18  | 682    | 0.92 | 0.09 | 9  |
| 22 F26D10.3 | SINPDEAVAYGAAVQAAILSGDK | 27  | 2652   | 0.92 | 0.19 | 20 |
| 1 F26D10.3  | DAVVTVPAYFNDSQRQATK     | 20  | 1501   | 0.93 | 0.17 | 18 |
| 1 F26D10.3  | NGLESYAFNLK             | 67  | 4435   | 0.93 | 0.09 | 9  |
| 1 F26D10.3  | SQVHDIVLVGGSTRIPK       | 18  | 7509   | 0.93 | 0.11 | 11 |
| 22 F26D10.3 | NGLESYAFNLK             | 13  | 1204   | 0.93 | 0.22 | 23 |
| 1 F26D10.3  | SQVHDIVLVGGSTRIPK       | 21  | 3659   | 0.93 | 0.25 | 26 |
| 1 F26D10.3  | DAVVTVPAYFNDSQRQATK     | 19  | 4340   | 0.93 | 0.26 | 27 |
| 22 F26D10.3 | DAVVTVPAYFNDSQRQATK     | 12  | 48914  | 0.94 | 0.18 | 19 |
| 7 F26D10.3  | NQVAMNPHNTVFDAK         | 28  | 8124   | 0.94 | 0.13 | 13 |
| 1 F26D10.3  | DLEGLANPIISK            | 23  | 1190   | 0.94 | 0.11 | 11 |
| 7 F26D10.3  | LLSDFSGK                | 23  | 760    | 0.94 | 0.17 | 18 |
| 22 F26D10.3 | SQVHDIVLVGGSTRIPK       | 17  | 3265   | 0.94 | 0.24 | 25 |
| 22 F26D10.3 | SQVHDIVLVGGSTRIPK       | 15  | 15125  | 0.94 | 0.19 | 20 |
| 1 F26D10.3  | DAVVTVPAYFNDSQRQATK     | 23  | 1895   | 0.95 | 0.14 | 15 |
| 7 F26D10.3  | SQVHDIVLVGGSTRIPK       | 18  | 4414   | 0.95 | 0.14 | 15 |
| 22 F26D10.3 | SQVHDIVLVGGSTRIPK       | 22  | 4472   | 0.95 | 0.23 | 24 |
| 1 F26D10.3  | NQVAMNPHNTVFDAK         | 50  | 3071   | 0.95 | 0.23 | 24 |
| 22 F26D10.3 | DAVVTVPAYFNDSQRQATK     | 38  | 2344   | 0.95 | 0.20 | 21 |
| 1 F26D10.3  | IFTPEEISSMVLK           | 52  | 1476   | 0.96 | 0.21 | 22 |
| 22 F26D10.3 | SINPDEAVAYGAAVQAAILSGDK | 65  | 4221   | 0.96 | 0.12 | 13 |
| 7 F26D10.3  | RNTTIPTK                | 28  | 2158   | 0.96 | 0.07 | 7  |
| 1 F26D10.3  | RNTTIPTK                | 14  | 1246   | 0.97 | 0.12 | 13 |
| 7 F26D10.3  | NGLESYAFNLK             | 43  | 2120   | 0.97 | 0.10 | 10 |
| 22 F26D10.3 | SQVHDIVLVGGSTRIPK       | 15  | 27228  | 0.97 | 0.13 | 14 |
| 22 F26D10.3 | SINPDEAVAYGAAVQAAILSGDK | 34  | 1690   | 0.97 | 0.16 | 16 |
| 22 F26D10.3 | NGLESYAFNLK             | 18  | 2541   | 0.97 | 0.15 | 16 |
| 7 F26D10.3  | SQVHDIVLVGGSTRIPK       | 13  | 5801   | 0.97 | 0.18 | 18 |
| 22 F26D10.3 | LLSDFSGK                | 62  | 1345   | 0.98 | 0.12 | 13 |
| 1 F26D10.3  | IFTPEEISSMVLK           | 55  | 1753   | 0.98 | 0.17 | 17 |
| 22 F26D10.3 | SINPDEAVAYGAAVQAAILSGDK | 119 | 4391   | 0.98 | 0.13 | 14 |
| 7 F26D10.3  | DLEGLANPIISK            | 34  | 1354   | 0.98 | 0.19 | 20 |
| 1 F26D10.3  | DLEGLANPIISK            | 64  | 2270   | 0.98 | 0.14 | 14 |
| 7 F26D10.3  | NGLESYAFNLK             | 22  | 776    | 0.99 | 0.16 | 16 |
| 1 F26D10.3  | SQVHDIVLVGGSTRIPK       | 18  | 5001   | 0.99 | 0.10 | 10 |
| 1 F26D10.3  | SQVHDIVLVGGSTRIPK       | 32  | 10991  | 0.99 | 0.14 | 15 |
| 22 F26D10.3 | IFTPEEISSMVLK           | 53  | 1495   | 0.99 | 0.14 | 14 |
| 1 F26D10.3  | IFTPEEISSMVLK           | 30  | 841    | 0.99 | 0.23 | 23 |
| 1 F26D10.3  | NGLESYAFNLK             | 36  | 1013   | 0.99 | 0.12 | 12 |
| 1 F26D10.3  | LLSDFSGK                | 14  | 698    | 0.99 | 0.21 | 21 |
| 1 F26D10.3  | LLSDFSGK                | 31  | 481    | 1.00 | 0.14 | 14 |
| 7 F26D10.3  | SQVHDIVLVGGSTRIPK       | 25  | 30800  | 1.00 | 0.09 | 9  |
| 7 F26D10.3  | NGLESYAFNLK             | 62  | 2969   | 1.00 | 0.12 | 12 |
| 7 F26D10.3  | IFTPEEISSMVLK           | 23  | 1331   | 1.00 | 0.14 | 14 |
| 1 F26D10.3  | IFTPEEISSMVLK           | 34  | 683    | 1.00 | 0.14 | 14 |
| 7 F26D10.3  | RNTTIPTK                | 20  | 1608   | 1.00 | 0.07 | 7  |
| 1 F26D10.3  | SQVHDIVLVGGSTRIPK       | 14  | 8056   | 1.00 | 0.11 | 11 |
| 22 F26D10.3 | SINPDEAVAYGAAVQAAILSGDK | 105 | 5073   | 1.01 | 0.13 | 13 |
| 7 F26D10.3  | SQVHDIVLVGGSTRIPK       | 14  | 19134  | 1.01 | 0.08 | 8  |
| 7 F26D10.3  | SQVHDIVLVGGSTRIPK       | 11  | 7802   | 1.01 | 0.18 | 18 |
| 22 F26D10.3 | NQVAMNPHNTVFDAK         | 71  | 5813   | 1.01 | 0.10 | 10 |
| 7 F26D10.3  | NQVAMNPHNTVFDAK         | 19  | 5397   | 1.01 | 0.11 | 11 |
| 1 F26D10.3  | DLEGLANPIISK            | 18  | 583    | 1.01 | 0.25 | 25 |
| 7 F26D10.3  | RNTTIPTK                | 27  | 2055   | 1.01 | 0.09 | 9  |
| 7 F26D10.3  | NQVAMNPHNTVFDAK         | 76  | 3615   | 1.01 | 0.15 | 15 |
| 22 F26D10.3 | LLSDFSGK                | 29  | 819    | 1.01 | 0.15 | 15 |
| 1 F26D10.3  | ETAEAFLGTTVK            | 34  | 3453   | 1.02 | 0.11 | 10 |
| 7 F26D10.3  | IFTPEEISSMVLK           | 34  | 514    | 1.02 | 0.06 | 6  |
| 1 F26D10.3  | IFTPEEISSMVLK           | 49  | 1715   | 1.02 | 0.16 | 15 |
| 22 F26D10.3 | SQVHDIVLVGGSTRIPK       | 33  | 11223  | 1.02 | 0.17 | 17 |
| 1 F26D10.3  | NQVAMNPHNTVFDAK         | 19  | 9039   | 1.02 | 0.24 | 23 |
| 1 F26D10.3  | LLSDFSGK                | 14  | 370    | 1.02 | 0.18 | 18 |
| 1 F26D10.3  | SQVHDIVLVGGSTRIPK       | 18  | 14925  | 1.02 | 0.18 | 18 |
| 22 F26D10.3 | HWPFK                   | 11  | 7483   | 1.03 | 0.09 | 8  |
| 1 F26D10.3  | DLEGLANPIISK            | 34  | 887    | 1.03 | 0.20 | 20 |
| 22 F26D10.3 | SINPDEAVAYGAAVQAAILSGDK | 103 | 2695   | 1.03 | 0.14 | 13 |
| 7 F26D10.3  | RNTTIPTK                | 21  | 1802   | 1.03 | 0.09 | 9  |
| 1 F26D10.3  | SQVHDIVLVGGSTRIPK       | 16  | 3488   | 1.04 | 0.10 | 10 |
| 1 F26D10.3  | SQVHDIVLVGGSTRIPK       | 24  | 9033   | 1.04 | 0.13 | 12 |
| 22 F26D10.3 | SQVHDIVLVGGSTRIPK       | 21  | 11473  | 1.04 | 0.19 | 18 |
| 7 F26D10.3  | IFTPEEISSMVLK           | 58  | 736    | 1.04 | 0.15 | 15 |
| 1 F26D10.3  | IFTPEEISSMVLK           | 69  | 1351   | 1.04 | 0.14 | 14 |
| 1 F26D10.3  | LLSDFSGK                | 26  | 275    | 1.04 | 0.17 | 16 |
| 22 F26D10.3 | SQVHDIVLVGGSTRIPK       | 15  | 31041  | 1.05 | 0.14 | 13 |
| 7 F26D10.3  | VISAEGAKPK              | 51  | 3472   | 1.05 | 0.13 | 13 |
| 1 F26D10.3  | SQVHDIVLVGGSTRIPK       | 15  | 5184   | 1.05 | 0.17 | 16 |
| 22 F26D10.3 | SINPDEAVAYGAAVQAAILSGDK | 124 | 2840   | 1.05 | 0.13 | 13 |
| 7 F26D10.3  | IFTPEEISSMVLK           | 21  | 962    | 1.06 | 0.20 | 19 |
| 1 F26D10.3  | SQVHDIVLVGGSTRIPK       | 33  | 7116   | 1.06 | 0.20 | 19 |
| 1 F26D10.3  | LLSDFSGK                | 16  | 309    | 1.06 | 0.22 | 21 |
| 22 F26D10.3 | NQVAMNPHNTVFDAK         | 80  | 6098   | 1.06 | 0.24 | 22 |
| 22 F26D10.3 | RNTTIPTK                | 11  | 3350   | 1.06 | 0.04 | 3  |
| 1 F26D10.3  | DLEGLANPIISK            | 33  | 687    | 1.07 | 0.18 | 16 |
| 1 F26D10.3  | SQVHDIVLVGGSTRIPK       | 19  | 8784   | 1.07 | 0.17 | 16 |
| 7 F26D10.3  | IFTPEEISSMVLK           | 25  | 707    | 1.07 | 0.11 | 10 |
| 1 F26D10.3  | ETAEAFLGTTVK            | 61  | 3070   | 1.07 | 0.10 | 9  |
| 1 F26D10.3  | NQVAMNPHNTVFDAK         | 59  | 7444   | 1.07 | 0.12 | 11 |
| 1 F26D10.3  | NQVAMNPHNTVFDAK         | 68  | 7015   | 1.08 | 0.08 | 8  |
| 22 F26D10.3 | NGLESYAFNLK             | 51  | 2446   | 1.08 | 0.10 | 10 |

|             |                              |    |        |      |      |    |
|-------------|------------------------------|----|--------|------|------|----|
| 22 F26D10.3 | ETAEAFLGTTVK                 | 37 | 2175   | 1.08 | 0.10 | 9  |
| 7 F26D10.3  | NQVAMNPHNTVFDAK              | 88 | 4757   | 1.08 | 0.19 | 18 |
| 1 F26D10.3  | NQVAMNPHNTVFDAK              | 83 | 5830   | 1.08 | 0.08 | 7  |
| 22 F26D10.3 | NQVAMNPHNTVFDAK              | 93 | 11943  | 1.08 | 0.16 | 15 |
| 22 F26D10.3 | TAQTFTTYSDNQPGVLIQVYEGERAMTK | 59 | 7502   | 1.09 | 0.13 | 12 |
| 22 F26D10.3 | VQVEYK                       | 10 | 13867  | 1.09 | 0.29 | 26 |
| 1 F26D10.3  | SQVHDIVLVGGSTRIPK            | 42 | 2541   | 1.09 | 0.21 | 19 |
| 22 F26D10.3 | NQVAMNPHNTVFDAK              | 16 | 7378   | 1.09 | 0.18 | 16 |
| 7 F26D10.3  | LLSDFSGK                     | 20 | 796    | 1.09 | 0.18 | 17 |
| 22 F26D10.3 | LLSDFSGK                     | 30 | 1160   | 1.09 | 0.11 | 10 |
| 22 F26D10.3 | SQVHDIVLVGGSTRIPK            | 15 | 3329   | 1.09 | 0.10 | 9  |
| 1 F26D10.3  | NGLESYAFNLK                  | 90 | 2713   | 1.10 | 0.08 | 7  |
| 7 F26D10.3  | ETAEAFLGTTVK                 | 47 | 3330   | 1.10 | 0.10 | 9  |
| 22 F26D10.3 | SQVHDIVLVGGSTRIPK            | 19 | 10820  | 1.10 | 0.10 | 9  |
| 7 F26D10.3  | SQVHDIVLVGGSTRIPK            | 11 | 5539   | 1.10 | 0.05 | 4  |
| 1 F26D10.3  | SQVHDIVLVGGSTRIPK            | 12 | 2507   | 1.10 | 0.18 | 16 |
| 1 F26D10.3  | NGLESYAFNLK                  | 76 | 2885   | 1.10 | 0.19 | 17 |
| 1 F26D10.3  | RNTTIPTK                     | 26 | 1735   | 1.10 | 0.20 | 18 |
| 7 F26D10.3  | NQVAMNPHNTVFDAK              | 76 | 3184   | 1.10 | 0.17 | 16 |
| 7 F26D10.3  | NQVAMNPHNTVFDAK              | 76 | 4324   | 1.10 | 0.10 | 9  |
| 22 F26D10.3 | LLSDFSGK                     | 24 | 530    | 1.10 | 0.23 | 21 |
| 1 F26D10.3  | SQVHDIVLVGGSTRIPK            | 15 | 8157   | 1.11 | 0.15 | 14 |
| 22 F26D10.3 | RNTTIPTK                     | 12 | 592    | 1.12 | 0.17 | 16 |
| 1 F26D10.3  | ETAEAFLGTTVK                 | 47 | 2380   | 1.12 | 0.12 | 10 |
| 22 F26D10.3 | NQVAMNPHNTVFDAK              | 71 | 3643   | 1.12 | 0.13 | 11 |
| 7 F26D10.3  | IFTPEEISSMVLLK               | 53 | 1272   | 1.12 | 0.22 | 19 |
| 22 F26D10.3 | SINPDEAVAYGAAVQAAILSGDK      | 27 | 1871   | 1.12 | 0.14 | 13 |
| 22 F26D10.3 | RNTTIPTK                     | 17 | 1654   | 1.12 | 0.11 | 10 |
| 22 F26D10.3 | NQVAMNPHNTVFDAK              | 88 | 8980   | 1.13 | 0.12 | 11 |
| 22 F26D10.3 | SQVHDIVLVGGSTRIPK            | 23 | 5862   | 1.13 | 0.20 | 18 |
| 7 F26D10.3  | NQVAMNPHNTVFDAK              | 54 | 2667   | 1.13 | 0.16 | 14 |
| 22 F26D10.3 | HWPFK                        | 10 | 86196  | 1.14 | 0.05 | 5  |
| 7 F26D10.3  | LLSDFSGK                     | 42 | 1015   | 1.14 | 0.13 | 12 |
| 1 F26D10.3  | DLEGLANPIISK                 | 22 | 501    | 1.14 | 0.17 | 14 |
| 1 F26D10.3  | DLEGLANPIISK                 | 13 | 919    | 1.14 | 0.11 | 9  |
| 7 F26D10.3  | NQVAMNPHNTVFDAK              | 58 | 3032   | 1.15 | 0.15 | 13 |
| 1 F26D10.3  | DLEGLANPIISK                 | 62 | 2117   | 1.16 | 0.17 | 14 |
| 22 F26D10.3 | NGLESYAFNLK                  | 77 | 29615  | 1.16 | 0.07 | 6  |
| 7 F26D10.3  | SQVHDIVLVGGSTRIPK            | 18 | 4788   | 1.17 | 0.10 | 8  |
| 7 F26D10.3  | RNTTIPTK                     | 36 | 1927   | 1.17 | 0.07 | 6  |
| 7 F26D10.3  | RNTTIPTK                     | 30 | 3068   | 1.17 | 0.09 | 8  |
| 1 F26D10.3  | DLEGLANPIISK                 | 10 | 672    | 1.17 | 0.13 | 11 |
| 22 F26D10.3 | SQVHDIVLVGGSTRIPK            | 91 | 7604   | 1.17 | 0.11 | 9  |
| 1 F26D10.3  | NGLESYAFNLK                  | 55 | 1677   | 1.18 | 0.13 | 11 |
| 22 F26D10.3 | NQVAMNPHNTVFDAK              | 21 | 16461  | 1.18 | 0.10 | 8  |
| 7 F26D10.3  | NQVAMNPHNTVFDAK              | 58 | 5676   | 1.18 | 0.12 | 10 |
| 22 F26D10.3 | NQVAMNPHNTVFDAK              | 80 | 5231   | 1.18 | 0.10 | 9  |
| 7 F26D10.3  | RNTTIPTK                     | 10 | 509    | 1.18 | 0.12 | 10 |
| 7 F26D10.3  | NQVAMNPHNTVFDAK              | 81 | 2931   | 1.19 | 0.14 | 12 |
| 22 F26D10.3 | HWPFK                        | 13 | 75599  | 1.19 | 0.03 | 2  |
| 22 F26D10.3 | DAVVTVPAYFNDSQRQATK          | 12 | 3497   | 1.19 | 0.13 | 11 |
| 22 F26D10.3 | LLSDFSGK                     | 25 | 745    | 1.19 | 0.24 | 20 |
| 7 F26D10.3  | RNTTIPTK                     | 15 | 1223   | 1.19 | 0.10 | 8  |
| 22 F26D10.3 | LLSDFSGK                     | 35 | 821    | 1.20 | 0.20 | 16 |
| 22 F26D10.3 | NGLESYAFNLK                  | 16 | 929    | 1.20 | 0.16 | 13 |
| 1 F26D10.3  | IFTPEEISSMVLLK               | 16 | 560    | 1.20 | 0.12 | 10 |
| 22 F26D10.3 | RNTTIPTK                     | 11 | 2398   | 1.20 | 0.12 | 10 |
| 22 F26D10.3 | NGLESYAFNLK                  | 24 | 597    | 1.21 | 0.17 | 14 |
| 22 F26D10.3 | ETAEAFLGTTVK                 | 38 | 2406   | 1.21 | 0.13 | 11 |
| 22 F26D10.3 | NGLESYAFNLK                  | 68 | 18124  | 1.22 | 0.09 | 7  |
| 7 F26D10.3  | NQVAMNPHNTVFDAK              | 61 | 3875   | 1.22 | 0.24 | 20 |
| 22 F26D10.3 | DAVVTVPAYFNDSQRQATK          | 51 | 4580   | 1.22 | 0.16 | 13 |
| 22 F26D10.3 | RNTTIPTK                     | 27 | 2589   | 1.23 | 0.12 | 10 |
| 7 F26D10.3  | NQVAMNPHNTVFDAK              | 76 | 4017   | 1.23 | 0.10 | 8  |
| 7 F26D10.3  | IFTPEEISSMVLLK               | 52 | 810    | 1.23 | 0.16 | 13 |
| 1 F26D10.3  | SQVHDIVLVGGSTRIPK            | 28 | 5048   | 1.24 | 0.20 | 16 |
| 7 F26D10.3  | SQVHDIVLVGGSTRIPK            | 23 | 4687   | 1.24 | 0.19 | 15 |
| 22 F26D10.3 | IFTPEEISSMVLLK               | 31 | 581    | 1.24 | 0.18 | 14 |
| 22 F26D10.3 | NQVAMNPHNTVFDAK              | 84 | 7507   | 1.24 | 0.13 | 10 |
| 7 F26D10.3  | LLSDFSGK                     | 29 | 837    | 1.25 | 0.21 | 17 |
| 22 F26D10.3 | SQVHDIVLVGGSTRIPK            | 36 | 140193 | 1.25 | 0.19 | 15 |
| 22 F26D10.3 | SQVHDIVLVGGSTRIPK            | 77 | 10071  | 1.25 | 0.15 | 12 |
| 1 F26D10.3  | LLSDFSGK                     | 12 | 605    | 1.25 | 0.12 | 10 |
| 1 F26D10.3  | NGLESYAFNLK                  | 46 | 1613   | 1.26 | 0.11 | 9  |
| 22 F26D10.3 | RNTTIPTK                     | 20 | 1244   | 1.27 | 0.08 | 6  |
| 7 F26D10.3  | LLSDFSGK                     | 14 | 953    | 1.27 | 0.28 | 22 |
| 22 F26D10.3 | IFTPEEISSMVLLK               | 43 | 1093   | 1.28 | 0.11 | 9  |
| 7 F26D10.3  | SQVHDIVLVGGSTRIPK            | 15 | 4783   | 1.28 | 0.23 | 18 |
| 22 F26D10.3 | NQVAMNPHNTVFDAK              | 88 | 4703   | 1.29 | 0.12 | 9  |
| 7 F26D10.3  | LLSDFSGK                     | 24 | 844    | 1.29 | 0.10 | 8  |
| 1 F26D10.3  | WLDSNQTAEK                   | 24 | 1488   | 1.29 | 0.15 | 12 |
| 7 F26D10.3  | DLEGLANPIISK                 | 12 | 1016   | 1.29 | 0.16 | 12 |
| 22 F26D10.3 | SINPDEAVAYGAAVQAAILSGDK      | 27 | 841    | 1.30 | 0.25 | 19 |
| 22 F26D10.3 | SINPDEAVAYGAAVQAAILSGDK      | 38 | 3948   | 1.30 | 0.14 | 11 |
| 7 F26D10.3  | VISAEGAKPK                   | 38 | 22913  | 1.30 | 0.24 | 18 |
| 7 F26D10.3  | RNTTIPTK                     | 18 | 2889   | 1.31 | 0.09 | 7  |
| 1 F26D10.3  | SQVHDIVLVGGSTRIPK            | 16 | 4877   | 1.31 | 0.09 | 7  |
| 22 F26D10.3 | NQVAMNPHNTVFDAK              | 70 | 4783   | 1.31 | 0.09 | 7  |
| 1 F26D10.3  | SQVHDIVLVGGSTRIPK            | 72 | 2468   | 1.31 | 0.16 | 12 |
| 1 F26D10.3  | DAVVTVPAYFNDSQRQATK          | 17 | 4175   | 1.31 | 0.08 | 6  |
| 22 F26D10.3 | SQVHDIVLVGGSTRIPK            | 15 | 19209  | 1.32 | 0.16 | 12 |
| 22 F26D10.3 | SQVHDIVLVGGSTRIPK            | 13 | 6673   | 1.32 | 0.15 | 11 |
| 22 F26D10.3 | IFTPEEISSMVLLK               | 50 | 1388   | 1.32 | 0.18 | 14 |
| 7 F26D10.3  | RNTTIPTK                     | 29 | 4738   | 1.33 | 0.06 | 4  |
| 1 F26D10.3  | SQVHDIVLVGGSTRIPK            | 17 | 3608   | 1.33 | 0.14 | 11 |
| 7 F26D10.3  | RNTTIPTK                     | 20 | 1528   | 1.33 | 0.09 | 7  |
| 1 F26D10.3  | WLDSNQTAEK                   | 29 | 979    | 1.33 | 0.09 | 7  |
| 7 F26D10.3  | RNTTIPTK                     | 32 | 6522   | 1.34 | 0.12 | 9  |
| 22 F26D10.3 | NQVAMNPHNTVFDAK              | 74 | 9757   | 1.34 | 0.10 | 7  |
| 1 F26D10.3  | SQVHDIVLVGGSTRIPK            | 22 | 11797  | 1.34 | 0.22 | 16 |
| 1 F26D10.3  | IFTPEEISSMVLLK               | 43 | 1097   | 1.34 | 0.08 | 6  |

|                     |                   |     |        |       |      |     |
|---------------------|-------------------|-----|--------|-------|------|-----|
| 22 F26D10.3         | SQVHDIVLVGGSTRIPK | 19  | 21382  | 1.35  | 0.15 | 11  |
| 1 F26D10.3          | IFTPEEISSMVLLK    | 66  | 1038   | 1.37  | 0.21 | 15  |
| 1 F26D10.3          | NQVAMNPHNTVFDAK   | 82  | 4635   | 1.38  | 0.12 | 9   |
| 7 F26D10.3          | SQVHDIVLVGGSTRIPK | 11  | 7229   | 1.39  | 0.19 | 14  |
| 1 F26D10.3          | DLEGLANPIISK      | 35  | 874    | 1.39  | 0.20 | 14  |
| 7 F26D10.3          | NQVAMNPHNTVFDAK   | 65  | 2624   | 1.40  | 0.17 | 12  |
| 7 F26D10.3          | SQVHDIVLVGGSTRIPK | 25  | 7043   | 1.40  | 0.18 | 13  |
| 22 F26D10.3         | HWPFK             | 13  | 273532 | 1.40  | 0.03 | 2   |
| 7 F26D10.3          | NQVAMNPHNTVFDAK   | 58  | 4614   | 1.41  | 0.10 | 7   |
| 22 F26D10.3         | IFTPEEISSMVLLK    | 20  | 884    | 1.41  | 0.18 | 13  |
| 22 F26D10.3         | SQVHDIVLVGGSTRIPK | 14  | 4399   | 1.41  | 0.22 | 15  |
| 1 F26D10.3          | IFTPEEISSMVLLK    | 33  | 733    | 1.41  | 0.09 | 6   |
| 1 F26D10.3          | ETAEAFLGTTVK      | 47  | 3962   | 1.42  | 0.09 | 7   |
| 22 F26D10.3         | IFTPEEISSMVLLK    | 21  | 1312   | 1.42  | 0.11 | 8   |
| 1 F26D10.3          | NGLESYAFNLK       | 36  | 1056   | 1.43  | 0.11 | 8   |
| 7 F26D10.3          | NQVAMNPHNTVFDAK   | 92  | 6823   | 1.43  | 0.12 | 8   |
| 7 F26D10.3          | RNTTIPTK          | 27  | 536    | 1.44  | 0.02 | 2   |
| 22 F26D10.3         | NQVAMNPHNTVFDAK   | 69  | 16318  | 1.44  | 0.09 | 6   |
| 1 F26D10.3          | NGLESYAFNLK       | 40  | 940    | 1.45  | 0.16 | 11  |
| 1 F26D10.3          | NQVAMNPHNTVFDAK   | 86  | 4441   | 1.45  | 0.08 | 6   |
| 7 F26D10.3          | NQVAMNPHNTVFDAK   | 36  | 1614   | 1.46  | 0.13 | 9   |
| 1 F26D10.3          | DLEGLANPIISK      | 50  | 1529   | 1.47  | 0.17 | 11  |
| 22 F26D10.3         | NQVAMNPHNTVFDAK   | 13  | 47431  | 1.49  | 0.17 | 12  |
| 7 F26D10.3          | IFTPEEISSMVLLK    | 51  | 1899   | 1.49  | 0.33 | 22  |
| 22 F26D10.3         | NQVAMNPHNTVFDAK   | 88  | 7336   | 1.50  | 0.09 | 6   |
| 22 F26D10.3         | HWPFK             | 19  | 365157 | 1.50  | 0.04 | 3   |
| 1 F26D10.3          | IFTPEEISSMVLLK    | 38  | 1019   | 1.50  | 0.18 | 12  |
| 1 F26D10.3          | NQVAMNPHNTVFDAK   | 68  | 3552   | 1.50  | 0.13 | 9   |
| 22 F26D10.3         | VISAEGAKPK        | 40  | 22149  | 1.51  | 0.23 | 15  |
| 22 F26D10.3         | SQVHDIVLVGGSTRIPK | 15  | 12111  | 1.51  | 0.16 | 10  |
| 1 F26D10.3          | RNTTIPTK          | 22  | 1157   | 1.51  | 0.14 | 9   |
| 22 F26D10.3         | HWPFK             | 11  | 274601 | 1.53  | 0.07 | 4   |
| 1 F26D10.3          | HWPFK             | 17  | 103796 | 1.53  | 0.11 | 7   |
| 1 F26D10.3          | NGLESYAFNLK       | 62  | 1415   | 1.54  | 0.23 | 15  |
| 7 F26D10.3          | RNTTIPTK          | 16  | 1038   | 1.54  | 0.08 | 5   |
| 1 F26D10.3          | IFTPEEISSMVLLK    | 43  | 1333   | 1.54  | 0.12 | 8   |
| 22 F26D10.3         | NQVAMNPHNTVFDAK   | 101 | 5550   | 1.55  | 0.17 | 11  |
| 1 F26D10.3          | LLSDFSGK          | 17  | 566    | 1.55  | 0.17 | 11  |
| 7 F26D10.3          | RNTTIPTK          | 18  | 934    | 1.56  | 0.11 | 7   |
| 1 F26D10.3          | RNTTIPTK          | 16  | 1159   | 1.57  | 0.08 | 5   |
| 1 F26D10.3          | VISAEGAKPK        | 60  | 6291   | 1.57  | 0.26 | 16  |
| 22 F26D10.3         | NQVAMNPHNTVFDAK   | 91  | 12600  | 1.59  | 0.13 | 8   |
| 7 F26D10.3          | RNTTIPTK          | 19  | 1222   | 1.59  | 0.04 | 3   |
| 22 F26D10.3         | RNTTIPTK          | 25  | 5258   | 1.60  | 0.07 | 5   |
| 22 F26D10.3         | RNTTIPTK          | 18  | 4229   | 1.60  | 0.07 | 5   |
| 1 F26D10.3          | NQVAMNPHNTVFDAK   | 55  | 3015   | 1.61  | 0.20 | 12  |
| 7 F26D10.3          | HWPFK             | 14  | 46489  | 1.62  | 0.10 | 6   |
| 1 F26D10.3          | NQVAMNPHNTVFDAK   | 24  | 4725   | 1.62  | 0.25 | 15  |
| 22 F26D10.3         | NQVAMNPHNTVFDAK   | 70  | 5586   | 1.63  | 0.14 | 9   |
| 1 F26D10.3          | NQVAMNPHNTVFDAK   | 58  | 1983   | 1.65  | 0.17 | 11  |
| 7 F26D10.3          | RNTTIPTK          | 23  | 1440   | 1.65  | 0.08 | 5   |
| 7 F26D10.3          | WLDSNQTAEK        | 60  | 1707   | 1.65  | 0.23 | 14  |
| 1 F26D10.3          | HWPFK             | 19  | 113081 | 1.66  | 0.06 | 4   |
| 1 F26D10.3          | IFTPEEISSMVLLK    | 64  | 1494   | 1.66  | 0.11 | 7   |
| 22 F26D10.3         | SQVHDIVLVGGSTRIPK | 15  | 8269   | 1.67  | 0.10 | 6   |
| 1 F26D10.3          | DLEGLANPIISK      | 11  | 823    | 1.67  | 0.13 | 8   |
| 1 F26D10.3          | NQVAMNPHNTVFDAK   | 73  | 5412   | 1.68  | 0.13 | 7   |
| 7 F26D10.3          | SQVHDIVLVGGSTRIPK | 19  | 7130   | 1.68  | 0.23 | 14  |
| 1 F26D10.3          | NGLESYAFNLK       | 46  | 1604   | 1.69  | 0.19 | 11  |
| 1 F26D10.3          | DLEGLANPIISK      | 27  | 413    | 1.70  | 0.03 | 2   |
| 7 F26D10.3          | RNTTIPTK          | 13  | 1202   | 1.74  | 0.14 | 8   |
| 1 F26D10.3          | ETAEAFLGTTVK      | 65  | 2879   | 1.74  | 0.27 | 16  |
| 7 F26D10.3          | RNTTIPTK          | 33  | 964    | 1.78  | 0.12 | 7   |
| 22 F26D10.3         | LLSDFSGK          | 43  | 1182   | 1.82  | 0.13 | 7   |
| 22 F26D10.3         | LLSDFSGK          | 38  | 1059   | 1.84  | 0.12 | 7   |
| 7 F26D10.3          | RNTTIPTK          | 20  | 771    | 1.86  | 0.12 | 7   |
| 22 F26D10.3         | NGLESYAFNLK       | 19  | 588    | 1.86  | 0.15 | 8   |
| 22 F26D10.3         | SQVHDIVLVGGSTRIPK | 16  | 2221   | 1.89  | 0.21 | 11  |
| 1 F26D10.3          | RNTTIPTK          | 16  | 952    | 1.90  | 0.15 | 8   |
| 22 F26D10.3         | SQVHDIVLVGGSTRIPK | 13  | 8571   | 1.93  | 0.15 | 8   |
| 22 F26D10.3         | LLSDFSGK          | 46  | 1192   | 1.96  | 0.13 | 7   |
| 22 F26D10.3         | NQVAMNPHNTVFDAK   | 13  | 7522   | 1.96  | 0.20 | 10  |
| 22 F26D10.3         | LLSDFSGK          | 16  | 573    | 2.01  | 0.19 | 10  |
| 7 F26D10.3          | RNTTIPTK          | 11  | 1685   | 2.03  | 0.09 | 4   |
| 22 F26D10.3         | LLSDFSGK          | 43  | 875    | 2.04  | 0.23 | 11  |
| 7 F26D10.3          | LLSDFSGK          | 15  | 897    | 2.09  | 0.29 | 14  |
| 1 F26D10.3          | NQVAMNPHNTVFDAK   | 52  | 2290   | 2.16  | 0.17 | 8   |
| 22 F26D10.3         | SQVHDIVLVGGSTRIPK | 18  | 6518   | 2.21  | 0.14 | 7   |
| 1 F26D10.3          | NQVAMNPHNTVFDAK   | 74  | 4118   | 2.21  | 0.23 | 10  |
| 22 F26D10.3         | LLSDFSGK          | 32  | 1073   | 2.24  | 0.11 | 5   |
| 7 F26D10.3          | RNTTIPTK          | 12  | 1423   | 2.27  | 0.06 | 3   |
| 7 F26D10.3          | RNTTIPTK          | 36  | 1473   | 2.37  | 0.10 | 4   |
| 7 F26D10.3          | RNTTIPTK          | 13  | 1803   | 2.43  | 0.08 | 3   |
| 22 F26D10.3         | LLSDFSGK          | 44  | 1334   | 2.44  | 0.13 | 5   |
| 7 F26D10.3          | RNTTIPTK          | 15  | 855    | 2.50  | 0.07 | 3   |
| 7 F26D10.3          | LLSDFSGK          | 42  | 856    | 2.52  | 0.12 | 5   |
| 22 F26D10.3         | NQVAMNPHNTVFDAK   | 12  | 24857  | 2.76  | 0.06 | 2   |
| 22 F26D10.3         | NQVAMNPHNTVFDAK   | 94  | 15777  | 2.78  | 0.17 | 6   |
| 7 F26D10.3          | LLSDFSGK          | 48  | 1134   | 2.97  | 0.14 | 5   |
| 7 F26D10.3          | LLSDFSGK          | 13  | 1180   | 2.98  | 0.45 | 15  |
| 1 F26D10.3          | VISAEGAKPK        | 50  | 8587   | 3.22  | 0.42 | 13  |
| 22 F26D10.3         | NQVAMNPHNTVFDAK   | 81  | 10700  | 3.39  | 0.12 | 3   |
| 7 F26D10.3          | LLSDFSGK          | 39  | 1607   | 4.14  | 0.27 | 7   |
| 22 F26D10.3         | VISAEGAKPK        | 55  | 16393  | 8.00  | 0.19 | 2   |
| 7 F26D10.3          | VISAEGAKPK        | 56  | 5351   | 17.92 | 0.26 | 1   |
| 10 F26D10.3;F11D5.6 | EEFEHQQK          | 47  | 6200   | 0.05  | 0.25 | 464 |
| 10 F26D10.3;F11D5.6 | EEFEHQQK          | 52  | 5814   | 0.06  | 0.15 | 237 |
| 10 F26D10.3;F11D5.6 | NQVAMNPHNTVFDAK   | 74  | 5485   | 0.08  | 0.17 | 201 |
| 10 F26D10.3;F11D5.6 | NGLESYAFNLK       | 80  | 4574   | 0.10  | 0.25 | 256 |
| 10 F26D10.3;F11D5.6 | NQVAMNPHNTVFDAK   | 73  | 5028   | 0.11  | 0.16 | 143 |
| 10 F26D10.3;F11D5.6 | NGLESYAFNLK       | 75  | 4231   | 0.12  | 0.18 | 152 |

|                     |                         |     |        |      |      |     |
|---------------------|-------------------------|-----|--------|------|------|-----|
| 10 F26D10.3;F11D5.6 | NQVAMNPHNTVFDK          | 67  | 4697   | 0.12 | 0.41 | 351 |
| 10 F26D10.3;F11D5.6 | DDIERMVNEAEK            | 24  | 3472   | 0.13 | 0.39 | 298 |
| 10 F26D10.3;F11D5.6 | NQVAMNPHNTVFDK          | 54  | 2381   | 0.16 | 0.31 | 188 |
| 10 F26D10.3;F11D5.6 | SQVHDIVLVGGSTRIPK       | 28  | 7203   | 0.19 | 0.15 | 80  |
| 10 F26D10.3;F11D5.6 | ETAEAFLGTTVK            | 64  | 2169   | 0.23 | 0.29 | 126 |
| 10 F26D10.3;F11D5.6 | SQVHDIVLVGGSTRIPK       | 31  | 7546   | 0.24 | 0.30 | 126 |
| 10 F26D10.3;F11D5.6 | SINPDEAVAYGAAVQAAILSGDK | 29  | 1705   | 0.25 | 0.20 | 80  |
| 10 F26D10.3;F11D5.6 | DLEGLANPIISK            | 43  | 1170   | 0.26 | 0.12 | 46  |
| 10 F26D10.3;F11D5.6 | IFTPEEISSMVLLK          | 46  | 1832   | 0.27 | 0.12 | 45  |
| 10 F26D10.3;F11D5.6 | LLSDFSGK                | 67  | 2036   | 0.28 | 0.30 | 108 |
| 10 F26D10.3;F11D5.6 | LLSDFSGK                | 62  | 2253   | 0.29 | 0.10 | 36  |
| 10 F26D10.3;F11D5.6 | DDIERMVNEAEK            | 30  | 4575   | 0.29 | 0.13 | 46  |
| 10 F26D10.3;F11D5.6 | ETAEAFLGTTVK            | 54  | 2750   | 0.32 | 0.24 | 73  |
| 10 F26D10.3;F11D5.6 | DDIERMVNEAEK            | 18  | 4487   | 0.33 | 0.33 | 99  |
| 10 F26D10.3;F11D5.6 | DDIERMVNEAEK            | 22  | 5973   | 0.35 | 0.26 | 75  |
| 10 F26D10.3;F11D5.6 | SQVHDIVLVGGSTRIPK       | 43  | 11461  | 0.38 | 0.29 | 75  |
| 10 F26D10.3;F11D5.6 | ETAEAFLGTTVK            | 14  | 1362   | 0.40 | 0.15 | 38  |
| 10 F26D10.3;F11D5.6 | IFTPEEISSMVLLK          | 40  | 1308   | 0.42 | 0.17 | 42  |
| 10 F26D10.3;F11D5.6 | DDIERMVNEAEK            | 14  | 3718   | 0.42 | 0.12 | 28  |
| 10 F26D10.3;F11D5.6 | DDIERMVNEAEK            | 40  | 10480  | 0.42 | 0.11 | 27  |
| 10 F26D10.3;F11D5.6 | DDIERMVNEAEK            | 33  | 6184   | 0.43 | 0.11 | 24  |
| 10 F26D10.3;F11D5.6 | LLSDFSGK                | 31  | 1075   | 0.46 | 0.14 | 31  |
| 10 F26D10.3;F11D5.6 | DDIERMVNEAEK            | 27  | 5440   | 0.48 | 0.17 | 36  |
| 10 F26D10.3;F11D5.6 | DDIERMVNEAEK            | 25  | 16321  | 0.48 | 0.10 | 22  |
| 10 F26D10.3;F11D5.6 | SINPDEAVAYGAAVQAAILSGDK | 24  | 914    | 0.51 | 0.22 | 44  |
| 10 F26D10.3;F11D5.6 | DDIERMVNEAEK            | 25  | 6124   | 0.51 | 0.11 | 22  |
| 10 F26D10.3;F11D5.6 | DDIERMVNEAEK            | 32  | 4434   | 0.51 | 0.28 | 55  |
| 10 F26D10.3;F11D5.6 | NQVAMNPHNTVFDK          | 63  | 2121   | 0.52 | 0.18 | 36  |
| 10 F26D10.3;F11D5.6 | ETAEAFLGTTVK            | 23  | 2152   | 0.52 | 0.22 | 42  |
| 10 F26D10.3;F11D5.6 | IFTPEEISSMVLLK          | 34  | 1867   | 0.54 | 0.15 | 27  |
| 10 F26D10.3;F11D5.6 | LLSDFSGK                | 47  | 1384   | 0.54 | 0.15 | 28  |
| 10 F26D10.3;F11D5.6 | DDIERMVNEAEK            | 48  | 16923  | 0.54 | 0.16 | 30  |
| 10 F26D10.3;F11D5.6 | LLSDFSGK                | 22  | 894    | 0.55 | 0.12 | 23  |
| 10 F26D10.3;F11D5.6 | DLEGLANPIISK            | 18  | 1028   | 0.55 | 0.30 | 55  |
| 10 F26D10.3;F11D5.6 | LLSDFSGK                | 67  | 2326   | 0.57 | 0.14 | 24  |
| 10 F26D10.3;F11D5.6 | IFTPEEISSMVLLK          | 60  | 2340   | 0.58 | 0.08 | 13  |
| 10 F26D10.3;F11D5.6 | DLEGLANPIISK            | 17  | 825    | 0.58 | 0.23 | 39  |
| 10 F26D10.3;F11D5.6 | IFTPEEISSMVLLK          | 46  | 1223   | 0.59 | 0.20 | 34  |
| 10 F26D10.3;F11D5.6 | LLSDFSGK                | 41  | 1489   | 0.62 | 0.20 | 32  |
| 10 F26D10.3;F11D5.6 | IFTPEEISSMVLLK          | 52  | 1420   | 0.63 | 0.15 | 24  |
| 10 F26D10.3;F11D5.6 | IFTPEEISSMVLLK          | 48  | 1534   | 0.64 | 0.11 | 18  |
| 10 F26D10.3;F11D5.6 | LLSDFSGK                | 35  | 930    | 0.65 | 0.13 | 20  |
| 10 F26D10.3;F11D5.6 | SQVHDIVLVGGSTRIPK       | 21  | 5840   | 0.65 | 0.09 | 13  |
| 10 F26D10.3;F11D5.6 | DLEGLANPIISK            | 12  | 762    | 0.66 | 0.25 | 37  |
| 10 F26D10.3;F11D5.6 | IFTPEEISSMVLLK          | 101 | 14238  | 0.67 | 0.08 | 12  |
| 10 F26D10.3;F11D5.6 | NGLESYAFNLK             | 40  | 1570   | 0.68 | 0.07 | 11  |
| 10 F26D10.3;F11D5.6 | SQVHDIVLVGGSTRIPK       | 20  | 40442  | 0.68 | 0.18 | 27  |
| 10 F26D10.3;F11D5.6 | LLSDFSGK                | 45  | 1219   | 0.70 | 0.18 | 26  |
| 10 F26D10.3;F11D5.6 | LLSDFSGK                | 35  | 1132   | 0.71 | 0.31 | 44  |
| 10 F26D10.3;F11D5.6 | DDIERMVNEAEK            | 42  | 11150  | 0.71 | 0.07 | 10  |
| 10 F26D10.3;F11D5.6 | NGLESYAFNLK             | 28  | 1011   | 0.73 | 0.13 | 18  |
| 10 F26D10.3;F11D5.6 | VISAEGAKPK              | 30  | 23315  | 0.73 | 0.39 | 54  |
| 10 F26D10.3;F11D5.6 | NGLESYAFNLK             | 45  | 4591   | 0.73 | 0.24 | 33  |
| 10 F26D10.3;F11D5.6 | VISAEGAKPK              | 28  | 15561  | 0.73 | 0.33 | 45  |
| 10 F26D10.3;F11D5.6 | ETAEAFLGTTVK            | 52  | 3546   | 0.74 | 0.26 | 35  |
| 10 F26D10.3;F11D5.6 | SQVHDIVLVGGSTRIPK       | 28  | 42410  | 0.74 | 0.14 | 19  |
| 10 F26D10.3;F11D5.6 | DLEGLANPIISK            | 28  | 1222   | 0.75 | 0.16 | 21  |
| 10 F26D10.3;F11D5.6 | NGLESYAFNLK             | 56  | 2309   | 0.75 | 0.14 | 18  |
| 10 F26D10.3;F11D5.6 | LLSDFSGK                | 79  | 2656   | 0.75 | 0.12 | 16  |
| 10 F26D10.3;F11D5.6 | NGLESYAFNLK             | 89  | 10064  | 0.76 | 0.13 | 17  |
| 10 F26D10.3;F11D5.6 | NGLESYAFNLK             | 16  | 1021   | 0.76 | 0.18 | 24  |
| 10 F26D10.3;F11D5.6 | NGLESYAFNLK             | 32  | 1185   | 0.76 | 0.20 | 26  |
| 10 F26D10.3;F11D5.6 | IFTPEEISSMVLLK          | 113 | 20531  | 0.77 | 0.09 | 12  |
| 10 F26D10.3;F11D5.6 | IFTPEEISSMVLLK          | 46  | 1405   | 0.77 | 0.34 | 44  |
| 10 F26D10.3;F11D5.6 | ETAEAFLGTTVK            | 34  | 2794   | 0.80 | 0.12 | 15  |
| 10 F26D10.3;F11D5.6 | DDIERMVNEAEK            | 25  | 4016   | 0.80 | 0.22 | 27  |
| 10 F26D10.3;F11D5.6 | ETAEAFLGTTVK            | 35  | 4766   | 0.82 | 0.12 | 15  |
| 10 F26D10.3;F11D5.6 | DAVVTVPAYFNDSQRQATK     | 14  | 44079  | 0.82 | 0.08 | 9   |
| 10 F26D10.3;F11D5.6 | NGLESYAFNLK             | 53  | 2630   | 0.82 | 0.17 | 21  |
| 10 F26D10.3;F11D5.6 | NGLESYAFNLK             | 78  | 11436  | 0.83 | 0.12 | 14  |
| 10 F26D10.3;F11D5.6 | SINPDEAVAYGAAVQAAILSGDK | 22  | 2115   | 0.83 | 0.10 | 12  |
| 10 F26D10.3;F11D5.6 | ETAEAFLGTTVK            | 46  | 3949   | 0.83 | 0.21 | 26  |
| 10 F26D10.3;F11D5.6 | LLSDFSGK                | 23  | 843    | 0.83 | 0.07 | 9   |
| 10 F26D10.3;F11D5.6 | WLDSNQTAEK              | 22  | 3302   | 0.87 | 0.06 | 7   |
| 10 F26D10.3;F11D5.6 | SQVHDIVLVGGSTRIPK       | 12  | 9798   | 0.87 | 0.17 | 19  |
| 10 F26D10.3;F11D5.6 | LLSDFSGK                | 30  | 814    | 0.88 | 0.11 | 13  |
| 10 F26D10.3;F11D5.6 | SQVHDIVLVGGSTRIPK       | 35  | 192353 | 0.88 | 0.16 | 18  |
| 10 F26D10.3;F11D5.6 | SQVHDIVLVGGSTRIPK       | 22  | 7922   | 0.88 | 0.07 | 8   |
| 10 F26D10.3;F11D5.6 | DDIERMVNEAEK            | 17  | 2482   | 0.90 | 0.14 | 16  |
| 10 F26D10.3;F11D5.6 | IFTPEEISSMVLLK          | 54  | 1378   | 0.91 | 0.25 | 28  |
| 10 F26D10.3;F11D5.6 | LLSDFSGK                | 28  | 811    | 0.91 | 0.15 | 17  |
| 10 F26D10.3;F11D5.6 | DLEGLANPIISK            | 84  | 44404  | 0.92 | 0.12 | 12  |
| 10 F26D10.3;F11D5.6 | LLSDFSGK                | 43  | 1037   | 0.93 | 0.18 | 20  |
| 10 F26D10.3;F11D5.6 | ETAEAFLGTTVK            | 13  | 1404   | 0.93 | 0.08 | 9   |
| 10 F26D10.3;F11D5.6 | IFTPEEISSMVLLK          | 15  | 654    | 0.94 | 0.13 | 14  |
| 10 F26D10.3;F11D5.6 | LLSDFSGK                | 51  | 1730   | 0.95 | 0.15 | 16  |
| 10 F26D10.3;F11D5.6 | DDIERMVNEAEK            | 22  | 2462   | 0.95 | 0.21 | 22  |
| 10 F26D10.3;F11D5.6 | IFTPEEISSMVLLK          | 58  | 1353   | 0.96 | 0.15 | 15  |
| 10 F26D10.3;F11D5.6 | IFTPEEISSMVLLK          | 42  | 865    | 0.97 | 0.23 | 24  |
| 10 F26D10.3;F11D5.6 | DAVVTVPAYFNDSQRQATK     | 14  | 6133   | 0.97 | 0.12 | 13  |
| 10 F26D10.3;F11D5.6 | SQVHDIVLVGGSTRIPK       | 23  | 14755  | 0.97 | 0.19 | 19  |
| 10 F26D10.3;F11D5.6 | ETAEAFLGTTVK            | 86  | 82030  | 0.98 | 0.09 | 9   |
| 10 F26D10.3;F11D5.6 | NGLESYAFNLK             | 53  | 2323   | 0.98 | 0.27 | 28  |
| 10 F26D10.3;F11D5.6 | ETAEAFLGTTVK            | 96  | 91082  | 0.99 | 0.06 | 6   |
| 10 F26D10.3;F11D5.6 | NGLESYAFNLK             | 62  | 2546   | 0.99 | 0.17 | 17  |
| 10 F26D10.3;F11D5.6 | IFTPEEISSMVLLK          | 83  | 2427   | 1.01 | 0.15 | 15  |
| 10 F26D10.3;F11D5.6 | DDIERMVNEAEK            | 11  | 2208   | 1.01 | 0.22 | 22  |
| 10 F26D10.3;F11D5.6 | LLSDFSGK                | 24  | 1030   | 1.02 | 0.14 | 13  |
| 10 F26D10.3;F11D5.6 | SINPDEAVAYGAAVQAAILSGDK | 13  | 1205   | 1.03 | 0.14 | 14  |
| 10 F26D10.3;F11D5.6 | NGLESYAFNLK             | 51  | 1878   | 1.03 | 0.18 | 17  |
| 10 F26D10.3;F11D5.6 | SQVHDIVLVGGSTRIPK       | 26  | 13793  | 1.03 | 0.18 | 18  |

|                     |                     |     |        |      |      |    |
|---------------------|---------------------|-----|--------|------|------|----|
| 10 F26D10.3;F11D5.6 | SQVHDIVLVGGSTRIPK   | 52  | 240733 | 1.03 | 0.13 | 13 |
| 10 F26D10.3;F11D5.6 | SQVHDIVLVGGSTRIPK   | 31  | 11231  | 1.04 | 0.30 | 29 |
| 10 F26D10.3;F11D5.6 | NQVAMNPHNTVFDAK     | 85  | 5790   | 1.04 | 0.17 | 17 |
| 10 F26D10.3;F11D5.6 | SQVHDIVLVGGSTRIPK   | 70  | 9916   | 1.05 | 0.08 | 8  |
| 10 F26D10.3;F11D5.6 | SQVHDIVLVGGSTRIPK   | 26  | 14903  | 1.07 | 0.20 | 19 |
| 10 F26D10.3;F11D5.6 | ETAEAFLGTTVK        | 19  | 1519   | 1.07 | 0.10 | 10 |
| 10 F26D10.3;F11D5.6 | NGLESYAFNLK         | 96  | 33604  | 1.08 | 0.07 | 7  |
| 10 F26D10.3;F11D5.6 | LLSDFSGK            | 68  | 1585   | 1.08 | 0.17 | 16 |
| 10 F26D10.3;F11D5.6 | SQVHDIVLVGGSTRIPK   | 10  | 11541  | 1.08 | 0.12 | 11 |
| 10 F26D10.3;F11D5.6 | SQVHDIVLVGGSTRIPK   | 26  | 8657   | 1.09 | 0.16 | 15 |
| 10 F26D10.3;F11D5.6 | IFTPEISSMVLLK       | 28  | 525    | 1.09 | 0.21 | 19 |
| 10 F26D10.3;F11D5.6 | RNTTIPTK            | 25  | 1578   | 1.10 | 0.08 | 7  |
| 10 F26D10.3;F11D5.6 | SQVHDIVLVGGSTRIPK   | 29  | 7478   | 1.11 | 0.21 | 19 |
| 10 F26D10.3;F11D5.6 | SQVHDIVLVGGSTRIPK   | 13  | 11060  | 1.11 | 0.07 | 7  |
| 10 F26D10.3;F11D5.6 | DLEGLANPIISK        | 15  | 711    | 1.11 | 0.17 | 15 |
| 10 F26D10.3;F11D5.6 | DLEGLANPIISK        | 77  | 37333  | 1.12 | 0.14 | 12 |
| 10 F26D10.3;F11D5.6 | RNTTIPTK            | 20  | 1991   | 1.12 | 0.14 | 13 |
| 10 F26D10.3;F11D5.6 | NGLESYAFNLK         | 53  | 1896   | 1.13 | 0.10 | 9  |
| 10 F26D10.3;F11D5.6 | IFTPEISSMVLLK       | 16  | 613    | 1.13 | 0.09 | 8  |
| 10 F26D10.3;F11D5.6 | DDIERMVNEAEK        | 31  | 3668   | 1.13 | 0.31 | 28 |
| 10 F26D10.3;F11D5.6 | LLSDFSGK            | 41  | 1103   | 1.13 | 0.22 | 19 |
| 10 F26D10.3;F11D5.6 | LLSDFSGK            | 62  | 2275   | 1.14 | 0.08 | 7  |
| 10 F26D10.3;F11D5.6 | RNTTIPTK            | 25  | 2611   | 1.16 | 0.14 | 12 |
| 10 F26D10.3;F11D5.6 | SQVHDIVLVGGSTRIPK   | 12  | 4479   | 1.17 | 0.12 | 10 |
| 10 F26D10.3;F11D5.6 | LLSDFSGK            | 17  | 379    | 1.17 | 0.14 | 12 |
| 10 F26D10.3;F11D5.6 | DAVVTVPAYFNDSQLQATK | 24  | 3811   | 1.18 | 0.09 | 7  |
| 10 F26D10.3;F11D5.6 | RNTTIPTK            | 15  | 2616   | 1.19 | 0.10 | 8  |
| 10 F26D10.3;F11D5.6 | DLEGLANPIISK        | 29  | 1006   | 1.20 | 0.27 | 22 |
| 10 F26D10.3;F11D5.6 | SQVHDIVLVGGSTRIPK   | 13  | 7498   | 1.21 | 0.20 | 16 |
| 10 F26D10.3;F11D5.6 | ETAEAFLGTTVK        | 18  | 5073   | 1.22 | 0.12 | 10 |
| 10 F26D10.3;F11D5.6 | SQVHDIVLVGGSTRIPK   | 94  | 10716  | 1.23 | 0.07 | 5  |
| 10 F26D10.3;F11D5.6 | RNTTIPTK            | 15  | 6929   | 1.24 | 0.18 | 15 |
| 10 F26D10.3;F11D5.6 | IFTPEISSMVLLK       | 49  | 1328   | 1.28 | 0.16 | 13 |
| 10 F26D10.3;F11D5.6 | NGLESYAFNLK         | 101 | 23063  | 1.28 | 0.06 | 5  |
| 10 F26D10.3;F11D5.6 | LLSDFSGK            | 18  | 727    | 1.29 | 0.24 | 19 |
| 10 F26D10.3;F11D5.6 | RNTTIPTK            | 13  | 1334   | 1.30 | 0.17 | 13 |
| 10 F26D10.3;F11D5.6 | LLSDFSGK            | 27  | 1076   | 1.30 | 0.17 | 13 |
| 10 F26D10.3;F11D5.6 | LLSDFSGK            | 12  | 782    | 1.31 | 0.17 | 13 |
| 10 F26D10.3;F11D5.6 | SQVHDIVLVGGSTRIPK   | 15  | 9056   | 1.31 | 0.14 | 11 |
| 10 F26D10.3;F11D5.6 | LLSDFSGK            | 91  | 38123  | 1.31 | 0.07 | 5  |
| 10 F26D10.3;F11D5.6 | NQVAMNPHNTVFDAK     | 70  | 16136  | 1.32 | 0.11 | 9  |
| 10 F26D10.3;F11D5.6 | LLSDFSGK            | 99  | 41883  | 1.36 | 0.07 | 5  |
| 10 F26D10.3;F11D5.6 | NGLESYAFNLK         | 12  | 1209   | 1.37 | 0.20 | 15 |
| 10 F26D10.3;F11D5.6 | DAVVTVPAYFNDSQLQATK | 19  | 4886   | 1.37 | 0.11 | 8  |
| 10 F26D10.3;F11D5.6 | SQVHDIVLVGGSTRIPK   | 15  | 3779   | 1.37 | 0.16 | 12 |
| 10 F26D10.3;F11D5.6 | SQVHDIVLVGGSTRIPK   | 20  | 10455  | 1.40 | 0.09 | 6  |
| 10 F26D10.3;F11D5.6 | VISAEGAKPK          | 32  | 12175  | 1.40 | 0.40 | 28 |
| 10 F26D10.3;F11D5.6 | NGLESYAFNLK         | 39  | 1291   | 1.41 | 0.11 | 8  |
| 10 F26D10.3;F11D5.6 | NQVAMNPHNTVFDAK     | 62  | 13381  | 1.42 | 0.08 | 6  |
| 10 F26D10.3;F11D5.6 | SQVHDIVLVGGSTRIPK   | 19  | 6776   | 1.44 | 0.09 | 6  |
| 10 F26D10.3;F11D5.6 | IFTPEISSMVLLK       | 51  | 1586   | 1.46 | 0.13 | 9  |
| 10 F26D10.3;F11D5.6 | NGLESYAFNLK         | 11  | 888    | 1.47 | 0.11 | 8  |
| 10 F26D10.3;F11D5.6 | RNTTIPTK            | 11  | 1664   | 1.47 | 0.07 | 4  |
| 10 F26D10.3;F11D5.6 | LLSDFSGK            | 47  | 1233   | 1.52 | 0.17 | 11 |
| 10 F26D10.3;F11D5.6 | SQVHDIVLVGGSTRIPK   | 15  | 13810  | 1.54 | 0.19 | 12 |
| 10 F26D10.3;F11D5.6 | LLSDFSGK            | 52  | 1479   | 1.55 | 0.21 | 14 |
| 10 F26D10.3;F11D5.6 | ETAEAFLGTTVK        | 13  | 1292   | 1.55 | 0.17 | 11 |
| 10 F26D10.3;F11D5.6 | SQVHDIVLVGGSTRIPK   | 19  | 12220  | 1.57 | 0.10 | 6  |
| 10 F26D10.3;F11D5.6 | SQVHDIVLVGGSTRIPK   | 17  | 8759   | 1.60 | 0.21 | 13 |
| 10 F26D10.3;F11D5.6 | LLSDFSGK            | 11  | 846    | 1.62 | 0.18 | 11 |
| 10 F26D10.3;F11D5.6 | NGLESYAFNLK         | 76  | 16027  | 1.64 | 0.08 | 5  |
| 10 F26D10.3;F11D5.6 | NGLESYAFNLK         | 57  | 9150   | 1.64 | 0.14 | 8  |
| 10 F26D10.3;F11D5.6 | NQVAMNPHNTVFDAK     | 27  | 19603  | 1.65 | 0.22 | 13 |
| 10 F26D10.3;F11D5.6 | LLSDFSGK            | 51  | 1009   | 1.72 | 0.14 | 8  |
| 10 F26D10.3;F11D5.6 | SQVHDIVLVGGSTRIPK   | 16  | 10563  | 1.77 | 0.05 | 3  |
| 10 F26D10.3;F11D5.6 | NQVAMNPHNTVFDAK     | 87  | 9643   | 1.80 | 0.17 | 10 |
| 10 F26D10.3;F11D5.6 | IFTPEISSMVLLK       | 45  | 1075   | 1.82 | 0.14 | 8  |
| 10 F26D10.3;F11D5.6 | LLSDFSGK            | 77  | 5740   | 1.83 | 0.07 | 4  |
| 10 F26D10.3;F11D5.6 | NQVAMNPHNTVFDAK     | 94  | 9058   | 1.84 | 0.12 | 7  |
| 10 F26D10.3;F11D5.6 | NQVAMNPHNTVFDAK     | 74  | 5057   | 1.85 | 0.11 | 6  |
| 10 F26D10.3;F11D5.6 | IFTPEISSMVLLK       | 41  | 1108   | 1.91 | 0.18 | 9  |
| 10 F26D10.3;F11D5.6 | HWPFK               | 15  | 92321  | 1.92 | 0.03 | 2  |
| 10 F26D10.3;F11D5.6 | NQVAMNPHNTVFDAK     | 74  | 8414   | 1.97 | 0.08 | 4  |
| 10 F26D10.3;F11D5.6 | LLSDFSGK            | 21  | 314    | 1.97 | 0.13 | 7  |
| 10 F26D10.3;F11D5.6 | NGLESYAFNLK         | 19  | 652    | 2.03 | 0.17 | 8  |
| 10 F26D10.3;F11D5.6 | NQVAMNPHNTVFDAK     | 97  | 66333  | 2.06 | 0.10 | 5  |
| 10 F26D10.3;F11D5.6 | NQVAMNPHNTVFDAK     | 13  | 15618  | 2.06 | 0.08 | 4  |
| 10 F26D10.3;F11D5.6 | LLSDFSGK            | 78  | 4992   | 2.08 | 0.10 | 5  |
| 10 F26D10.3;F11D5.6 | IFTPEISSMVLLK       | 31  | 446    | 2.13 | 0.12 | 5  |
| 10 F26D10.3;F11D5.6 | LLSDFSGK            | 38  | 1298   | 2.15 | 0.12 | 6  |
| 10 F26D10.3;F11D5.6 | RNTTIPTK            | 27  | 6377   | 2.15 | 0.11 | 5  |
| 10 F26D10.3;F11D5.6 | IFTPEISSMVLLK       | 46  | 1687   | 2.17 | 0.20 | 9  |
| 10 F26D10.3;F11D5.6 | NQVAMNPHNTVFDAK     | 99  | 72512  | 2.23 | 0.11 | 5  |
| 10 F26D10.3;F11D5.6 | LLSDFSGK            | 33  | 1094   | 2.24 | 0.16 | 7  |
| 10 F26D10.3;F11D5.6 | NQVAMNPHNTVFDAK     | 23  | 8108   | 2.26 | 0.24 | 11 |
| 10 F26D10.3;F11D5.6 | IFTPEISSMVLLK       | 51  | 1830   | 2.29 | 0.15 | 6  |
| 10 F26D10.3;F11D5.6 | SQVHDIVLVGGSTRIPK   | 17  | 10354  | 2.32 | 0.28 | 12 |
| 10 F26D10.3;F11D5.6 | RNTTIPTK            | 21  | 3407   | 2.37 | 0.15 | 6  |
| 10 F26D10.3;F11D5.6 | NQVAMNPHNTVFDAK     | 40  | 2424   | 2.45 | 0.21 | 8  |
| 10 F26D10.3;F11D5.6 | ETAEAFLGTTVK        | 11  | 3744   | 2.49 | 0.06 | 3  |
| 10 F26D10.3;F11D5.6 | NQVAMNPHNTVFDAK     | 30  | 18232  | 2.82 | 0.23 | 8  |
| 10 F26D10.3;F11D5.6 | LLSDFSGK            | 26  | 598    | 3.00 | 0.16 | 5  |
| 10 F26D10.3;F11D5.6 | IFTPEISSMVLLK       | 38  | 924    | 3.10 | 0.24 | 8  |
| 10 F26D10.3;F11D5.6 | NQVAMNPHNTVFDAK     | 76  | 3285   | 3.20 | 0.14 | 4  |
| 10 F26D10.3;F11D5.6 | LLSDFSGK            | 25  | 951    | 3.28 | 0.21 | 6  |
| 10 F26D10.3;F11D5.6 | NQVAMNPHNTVFDAK     | 13  | 21469  | 3.30 | 0.13 | 4  |
| 10 F26D10.3;F11D5.6 | IFTPEISSMVLLK       | 22  | 999    | 3.43 | 0.11 | 3  |
| 10 F26D10.3;F11D5.6 | NQVAMNPHNTVFDAK     | 70  | 11355  | 3.44 | 0.15 | 4  |
| 10 F26D10.3;F11D5.6 | NQVAMNPHNTVFDAK     | 84  | 9185   | 3.50 | 0.10 | 3  |
| 10 F26D10.3;F11D5.6 | NQVAMNPHNTVFDAK     | 15  | 23023  | 3.72 | 0.41 | 11 |
| 10 F26D10.3;F11D5.6 | NQVAMNPHNTVFDAK     | 58  | 13314  | 3.78 | 0.09 | 2  |

|                             |                              |     |       |       |      |     |
|-----------------------------|------------------------------|-----|-------|-------|------|-----|
| 10 F26D10.3;F11D5.6         | NQVAMNPHNTVFDAK              | 84  | 5694  | 3.84  | 0.15 | 4   |
| 10 F26D10.3;F11D5.6         | NQVAMNPHNTVFDAK              | 82  | 7815  | 4.19  | 0.17 | 4   |
| 10 F26D10.3;F11D5.6         | SINPDEAVAYGAAVQAAILSGDK      | 35  | 3270  | 4.44  | 0.46 | 10  |
| 10 F26D10.3;F11D5.6         | IFTPEISSMVLK                 | 57  | 1733  | 4.86  | 0.14 | 3   |
| 10 F26D10.3;F11D5.6         | NQVAMNPHNTVFDAK              | 69  | 5889  | 5.46  | 0.10 | 2   |
| 10 F26D10.3;F11D5.6         | SINPDEAVAYGAAVQAAILSGDK      | 64  | 2455  | 5.49  | 0.17 | 3   |
| 10 F26D10.3;F11D5.6         | NQVAMNPHNTVFDAK              | 74  | 6734  | 5.60  | 0.17 | 3   |
| 10 F26D10.3;F11D5.6         | SINPDEAVAYGAAVQAAILSGDK      | 106 | 3572  | 5.66  | 0.24 | 4   |
| 10 F26D10.3;F11D5.6         | LLSDFSGK                     | 22  | 758   | 6.35  | 0.26 | 4   |
| 10 F26D10.3;F11D5.6         | SINPDEAVAYGAAVQAAILSGDK      | 31  | 2736  | 7.99  | 0.32 | 4   |
| 10 F26D10.3;F11D5.6         | VISAEGAKPK                   | 54  | 13115 | 14.65 | 0.29 | 2   |
| 10 F26D10.3;F11D5.6         | DAGAIAGLNVLRIINEPTAAAIAYGLDK | 88  | 5646  | 26.98 | 0.36 | 1   |
| 10 F26E4.8;C47B2.3;Y19D2B.1 | EDAANNYARGHYTVGK             | 27  | 9963  | 0.25  | 0.24 | 95  |
| 7 F26E4.8;C47B2.3;Y19D2B.1  | EDAANNYARGHYTVGK             | 18  | 6133  | 0.41  | 0.39 | 95  |
| 1 F26E4.8;C47B2.3;Y19D2B.1  | DVNTAIAAIK                   | 55  | 1699  | 0.53  | 0.09 | 18  |
| 10 F26E4.8;C47B2.3;Y19D2B.1 | VGINYQPPTVVPGGDLAK           | 15  | 1918  | 0.53  | 0.13 | 24  |
| 7 F26E4.8;C47B2.3;Y19D2B.1  | EDAANNYARGHYTVGK             | 33  | 8807  | 0.54  | 0.21 | 38  |
| 1 F26E4.8;C47B2.3;Y19D2B.1  | DVNTAIAAIK                   | 63  | 8672  | 0.57  | 0.07 | 13  |
| 10 F26E4.8;C47B2.3;Y19D2B.1 | EDAANNYARGHYTVGK             | 23  | 21224 | 0.61  | 0.27 | 44  |
| 10 F26E4.8;C47B2.3;Y19D2B.1 | DVNTAIAAIK                   | 74  | 21279 | 0.62  | 0.06 | 10  |
| 1 F26E4.8;C47B2.3;Y19D2B.1  | DVNTAIAAIK                   | 55  | 2732  | 0.63  | 0.09 | 14  |
| 7 F26E4.8;C47B2.3;Y19D2B.1  | EDAANNYARGHYTVGK             | 21  | 13720 | 0.66  | 0.15 | 23  |
| 10 F26E4.8;C47B2.3;Y19D2B.1 | VGINYQPPTVVPGGDLAK           | 23  | 2945  | 0.72  | 0.07 | 9   |
| 10 F26E4.8;C47B2.3;Y19D2B.1 | LFHPEQMITGK                  | 12  | 29333 | 0.73  | 0.16 | 22  |
| 10 F26E4.8;C47B2.3;Y19D2B.1 | VGINYQPPTVVPGGDLAK           | 41  | 3488  | 0.73  | 0.16 | 22  |
| 7 F26E4.8;C47B2.3;Y19D2B.1  | EDAANNYARGHYTVGK             | 15  | 8696  | 0.75  | 0.24 | 31  |
| 10 F26E4.8;C47B2.3;Y19D2B.1 | VGINYQPPTVVPGGDLAK           | 35  | 3354  | 0.77  | 0.15 | 19  |
| 7 F26E4.8;C47B2.3;Y19D2B.1  | DVNTAIAAIK                   | 22  | 2389  | 0.78  | 0.19 | 24  |
| 10 F26E4.8;C47B2.3;Y19D2B.1 | VGINYQPPTVVPGGDLAK           | 40  | 4271  | 0.78  | 0.09 | 12  |
| 7 F26E4.8;C47B2.3;Y19D2B.1  | DVNTAIAAIK                   | 18  | 2335  | 0.81  | 0.11 | 14  |
| 10 F26E4.8;C47B2.3;Y19D2B.1 | VGINYQPPTVVPGGDLAK           | 33  | 7667  | 0.85  | 0.23 | 27  |
| 10 F26E4.8;C47B2.3;Y19D2B.1 | LFHPEQMITGK                  | 29  | 32941 | 0.87  | 0.18 | 21  |
| 1 F26E4.8;C47B2.3;Y19D2B.1  | LFHPEQMITGK                  | 16  | 7187  | 0.92  | 0.15 | 16  |
| 10 F26E4.8;C47B2.3;Y19D2B.1 | VGINYQPPTVVPGGDLAK           | 26  | 6026  | 0.95  | 0.12 | 12  |
| 10 F26E4.8;C47B2.3;Y19D2B.1 | DVNTAIAAIK                   | 60  | 2091  | 1.00  | 0.13 | 13  |
| 1 F26E4.8;C47B2.3;Y19D2B.1  | VGINYQPPTVVPGGDLAK           | 14  | 3157  | 1.04  | 0.06 | 6   |
| 7 F26E4.8;C47B2.3;Y19D2B.1  | VGINYQPPTVVPGGDLAK           | 39  | 5966  | 1.05  | 0.11 | 11  |
| 7 F26E4.8;C47B2.3;Y19D2B.1  | EDAANNYARGHYTVGK             | 12  | 11468 | 1.05  | 0.19 | 18  |
| 10 F26E4.8;C47B2.3;Y19D2B.1 | VGINYQPPTVVPGGDLAK           | 22  | 3593  | 1.06  | 0.22 | 21  |
| 10 F26E4.8;C47B2.3;Y19D2B.1 | VGINYQPPTVVPGGDLAK           | 25  | 8398  | 1.08  | 0.19 | 18  |
| 10 F26E4.8;C47B2.3;Y19D2B.1 | DVNTAIAAIK                   | 42  | 4979  | 1.11  | 0.10 | 9   |
| 1 F26E4.8;C47B2.3;Y19D2B.1  | LFHPEQMITGK                  | 25  | 6926  | 1.11  | 0.28 | 25  |
| 10 F26E4.8;C47B2.3;Y19D2B.1 | EDAANNYARGHYTVGK             | 20  | 15715 | 1.19  | 0.16 | 13  |
| 10 F26E4.8;C47B2.3;Y19D2B.1 | VGINYQPPTVVPGGDLAK           | 33  | 4448  | 1.19  | 0.11 | 9   |
| 7 F26E4.8;C47B2.3;Y19D2B.1  | VGINYQPPTVVPGGDLAK           | 46  | 9475  | 1.20  | 0.10 | 9   |
| 10 F26E4.8;C47B2.3;Y19D2B.1 | EDAANNYARGHYTVGK             | 27  | 12039 | 1.24  | 0.15 | 12  |
| 10 F26E4.8;C47B2.3;Y19D2B.1 | VGINYQPPTVVPGGDLAK           | 26  | 12512 | 1.25  | 0.19 | 15  |
| 1 F26E4.8;C47B2.3;Y19D2B.1  | VGINYQPPTVVPGGDLAK           | 11  | 1834  | 1.29  | 0.13 | 10  |
| 10 F26E4.8;C47B2.3;Y19D2B.1 | LFHPEQMITGK                  | 14  | 19916 | 1.29  | 0.09 | 7   |
| 7 F26E4.8;C47B2.3;Y19D2B.1  | VGINYQPPTVVPGGDLAK           | 13  | 2317  | 1.31  | 0.14 | 10  |
| 1 F26E4.8;C47B2.3;Y19D2B.1  | VGINYQPPTVVPGGDLAK           | 31  | 6140  | 1.37  | 0.13 | 10  |
| 1 F26E4.8;C47B2.3;Y19D2B.1  | VGINYQPPTVVPGGDLAK           | 35  | 2529  | 1.37  | 0.17 | 13  |
| 10 F26E4.8;C47B2.3;Y19D2B.1 | LFHPEQMITGK                  | 10  | 5430  | 1.42  | 0.11 | 8   |
| 1 F26E4.8;C47B2.3;Y19D2B.1  | VGINYQPPTVVPGGDLAK           | 45  | 6028  | 1.42  | 0.13 | 9   |
| 1 F26E4.8;C47B2.3;Y19D2B.1  | VGINYQPPTVVPGGDLAK           | 13  | 3189  | 1.51  | 0.28 | 19  |
| 1 F26E4.8;C47B2.3;Y19D2B.1  | VGINYQPPTVVPGGDLAK           | 22  | 2917  | 1.56  | 0.15 | 9   |
| 7 F26E4.8;C47B2.3;Y19D2B.1  | VGINYQPPTVVPGGDLAK           | 12  | 2428  | 1.61  | 0.09 | 6   |
| 10 F26E4.8;C47B2.3;Y19D2B.1 | EDAANNYARGHYTVGK             | 23  | 37745 | 1.62  | 0.15 | 9   |
| 1 F26E4.8;C47B2.3;Y19D2B.1  | VGINYQPPTVVPGGDLAK           | 34  | 3738  | 1.63  | 0.11 | 7   |
| 1 F26E4.8;C47B2.3;Y19D2B.1  | EDAANNYARGHYTVGK             | 29  | 11524 | 1.65  | 0.27 | 16  |
| 10 F26E4.8;C47B2.3;Y19D2B.1 | EDAANNYARGHYTVGK             | 18  | 27858 | 1.66  | 0.16 | 9   |
| 1 F26E4.8;C47B2.3;Y19D2B.1  | VGINYQPPTVVPGGDLAK           | 23  | 3113  | 1.74  | 0.13 | 7   |
| 1 F26E4.8;C47B2.3;Y19D2B.1  | LFHPEQMITGK                  | 17  | 5488  | 1.75  | 0.37 | 21  |
| 7 F26E4.8;C47B2.3;Y19D2B.1  | DVNTAIAAIK                   | 70  | 5673  | 1.80  | 0.10 | 5   |
| 1 F26E4.8;C47B2.3;Y19D2B.1  | EDAANNYARGHYTVGK             | 27  | 16293 | 1.82  | 0.23 | 13  |
| 7 F26E4.8;C47B2.3;Y19D2B.1  | EDAANNYARGHYTVGK             | 15  | 17483 | 1.82  | 0.22 | 12  |
| 1 F26E4.8;C47B2.3;Y19D2B.1  | DVNTAIAAIK                   | 74  | 5580  | 1.97  | 0.06 | 3   |
| 7 F26E4.8;C47B2.3;Y19D2B.1  | DVNTAIAAIK                   | 47  | 3445  | 1.99  | 0.10 | 5   |
| 7 F26E4.8;C47B2.3;Y19D2B.1  | EDAANNYARGHYTVGK             | 16  | 8079  | 2.15  | 0.25 | 11  |
| 1 F26E4.8;C47B2.3;Y19D2B.1  | LFHPEQMITGK                  | 17  | 4662  | 2.22  | 0.10 | 5   |
| 1 F26E4.8;C47B2.3;Y19D2B.1  | LFHPEQMITGK                  | 12  | 4094  | 2.25  | 0.29 | 13  |
| 7 F26E4.8;C47B2.3;Y19D2B.1  | DVNTAIAAIK                   | 47  | 3609  | 2.34  | 0.13 | 5   |
| 1 F26E4.8;C47B2.3;Y19D2B.1  | EDAANNYARGHYTVGK             | 25  | 12665 | 2.40  | 0.31 | 13  |
| 1 F26E4.8;C47B2.3;Y19D2B.1  | LFHPEQMITGK                  | 14  | 4637  | 2.66  | 0.12 | 4   |
| 1 F26E4.8;C47B2.3;Y19D2B.1  | LFHPEQMITGK                  | 12  | 3159  | 2.78  | 0.12 | 4   |
| 10 F26E4.8;C47B2.3;Y19D2B.1 | LFHPEQMITGK                  | 12  | 7070  | 3.90  | 0.20 | 5   |
| 10 F26E4.8;C47B2.3;Y19D2B.1 | VGINYQPPTVVPGGDLAK           | 39  | 6157  | 4.10  | 0.16 | 4   |
| 10 F26E4.8;C47B2.3;Y19D2B.1 | DVNTAIAAIK                   | 57  | 5400  | 4.42  | 0.27 | 6   |
| 10 F26E4.8;C47B2.3;Y19D2B.1 | EDAANNYARGHYTVGK             | 41  | 17043 | 5.40  | 0.26 | 5   |
| 10 F26E4.8;C47B2.3;Y19D2B.1 | EDAANNYARGHYTVGK             | 33  | 17543 | 8.98  | 0.31 | 3   |
| 10 F26E4.8;C47B2.3;Y19D2B.1 | LFHPEQMITGK                  | 16  | 7930  | 9.20  | 0.11 | 1   |
| 10 F26E4.8;C47B2.3;Y19D2B.1 | LFHPEQMITGK                  | 19  | 4971  | 9.85  | 0.09 | 1   |
| 22 F26E4.8;Y19D2B.1         | EDAANNYARGHYTVGK             | 27  | 30718 | 0.32  | 0.22 | 69  |
| 22 F26E4.8;Y19D2B.1         | LFHPEQMITGK                  | 22  | 3820  | 0.32  | 0.33 | 104 |
| 22 F26E4.8;Y19D2B.1         | EDAANNYARGHYTVGK             | 24  | 22029 | 0.40  | 0.32 | 80  |
| 22 F26E4.8;Y19D2B.1         | VGINYQPPTVVPGGDLAK           | 20  | 4633  | 0.55  | 0.07 | 12  |
| 22 F26E4.8;Y19D2B.1         | LFHPEQMITGK                  | 19  | 7870  | 0.59  | 0.17 | 29  |
| 22 F26E4.8;Y19D2B.1         | LFHPEQMITGK                  | 19  | 2804  | 0.60  | 0.49 | 81  |
| 22 F26E4.8;Y19D2B.1         | DVNTAIAAIK                   | 66  | 13335 | 0.66  | 0.04 | 6   |
| 22 F26E4.8;Y19D2B.1         | FDLMYAK                      | 13  | 571   | 0.66  | 0.28 | 42  |
| 22 F26E4.8;Y19D2B.1         | FDLMYAK                      | 12  | 562   | 0.66  | 0.08 | 13  |
| 22 F26E4.8;Y19D2B.1         | VGINYQPPTVVPGGDLAK           | 14  | 2337  | 0.67  | 0.06 | 9   |
| 22 F26E4.8;Y19D2B.1         | VGINYQPPTVVPGGDLAK           | 28  | 4730  | 0.73  | 0.17 | 24  |
| 22 F26E4.8;Y19D2B.1         | VGINYQPPTVVPGGDLAK           | 32  | 2537  | 0.74  | 0.14 | 18  |
| 22 F26E4.8;Y19D2B.1         | EDAANNYARGHYTVGK             | 15  | 3509  | 0.75  | 0.27 | 36  |
| 22 F26E4.8;Y19D2B.1         | VGINYQPPTVVPGGDLAK           | 34  | 4470  | 0.79  | 0.10 | 12  |
| 22 F26E4.8;Y19D2B.1         | LFHPEQMITGK                  | 13  | 11382 | 0.81  | 0.13 | 16  |
| 22 F26E4.8;Y19D2B.1         | DVNTAIAAIK                   | 56  | 5643  | 0.99  | 0.11 | 11  |
| 22 F26E4.8;Y19D2B.1         | EDAANNYARGHYTVGK             | 22  | 8258  | 1.00  | 0.21 | 21  |
| 22 F26E4.8;Y19D2B.1         | DVNTAIAAIK                   | 39  | 5205  | 1.02  | 0.10 | 10  |
| 22 F26E4.8;Y19D2B.1         | AYHEALSVNDITNSCFEPANQMVK     | 33  | 2792  | 1.07  | 0.15 | 14  |

|                                  |                    |     |       |      |      |     |
|----------------------------------|--------------------|-----|-------|------|------|-----|
| 22 F26E4.8;Y19D2B.1              | VGINYQPPTVVPGGDLAK | 34  | 17459 | 1.11 | 0.15 | 14  |
| 22 F26E4.8;Y19D2B.1              | VGINYQPPTVVPGGDLAK | 53  | 10175 | 1.23 | 0.10 | 8   |
| 22 F26E4.8;Y19D2B.1              | VGINYQPPTVVPGGDLAK | 49  | 12078 | 1.28 | 0.07 | 6   |
| 22 F26E4.8;Y19D2B.1              | VGINYQPPTVVPGGDLAK | 11  | 3309  | 1.37 | 0.16 | 11  |
| 22 F26E4.8;Y19D2B.1              | EDAANNYARGHYTVGK   | 14  | 16644 | 1.39 | 0.15 | 11  |
| 22 F26E4.8;Y19D2B.1              | VGINYQPPTVVPGGDLAK | 19  | 3564  | 1.42 | 0.20 | 14  |
| 22 F26E4.8;Y19D2B.1              | EDAANNYARGHYTVGK   | 14  | 8151  | 1.46 | 0.11 | 7   |
| 22 F26E4.8;Y19D2B.1              | EDAANNYARGHYTVGK   | 27  | 14895 | 1.46 | 0.16 | 11  |
| 22 F26E4.8;Y19D2B.1              | EDAANNYARGHYTVGK   | 17  | 23421 | 1.49 | 0.13 | 9   |
| 22 F26E4.8;Y19D2B.1              | LFHPEQMITGK        | 21  | 6775  | 1.54 | 0.26 | 17  |
| 22 F26E4.8;Y19D2B.1              | EDAANNYARGHYTVGK   | 24  | 7620  | 1.68 | 0.22 | 13  |
| 22 F26E4.8;Y19D2B.1              | EDAANNYARGHYTVGK   | 29  | 13540 | 1.87 | 0.11 | 6   |
| 22 F26F4.10a;F26F4.10b;F26F4.10c | SDGGFTYDTSDLAALK   | 80  | 1957  | 0.84 | 0.12 | 14  |
| 22 F26F4.10a;F26F4.10b;F26F4.10c | SDGGFTYDTSDLAALK   | 70  | 2206  | 0.86 | 0.20 | 23  |
| 22 F26F4.10a;F26F4.10b;F26F4.10c | RAYEYVVK           | 38  | 5018  | 0.95 | 0.09 | 9   |
| 22 F26F4.10a;F26F4.10b;F26F4.10c | LQSHDGDIVK         | 41  | 6346  | 0.97 | 0.08 | 8   |
| 22 F26F4.10a;F26F4.10b;F26F4.10c | LQSHDGDIVK         | 20  | 6687  | 1.02 | 0.12 | 12  |
| 22 F26F4.10a;F26F4.10b;F26F4.10c | YIASTPTLPLDHPGEFK  | 42  | 1961  | 1.05 | 0.17 | 16  |
| 22 F26F4.10a;F26F4.10b;F26F4.10c | RAYEYVVK           | 21  | 2517  | 1.15 | 0.12 | 11  |
| 10 F26F4.10a;F26F4.10c           | LQSHDGDIVK         | 44  | 7595  | 0.48 | 0.12 | 25  |
| 10 F26F4.10a;F26F4.10c           | LQSHDGDIVK         | 58  | 8079  | 0.50 | 0.12 | 25  |
| 10 F26F4.10a;F26F4.10c           | YIASTPTLPLDHPGEFK  | 76  | 2550  | 0.66 | 0.09 | 14  |
| 10 F26F4.10a;F26F4.10c           | SDGGFTYDTSDLAALK   | 52  | 1889  | 0.69 | 0.19 | 28  |
| 10 F26F4.10a;F26F4.10c           | SDGGFTYDTSDLAALK   | 59  | 1966  | 0.71 | 0.14 | 20  |
| 10 F26F4.10a;F26F4.10c           | YIASTPTLPLDHPGEFK  | 53  | 2555  | 0.73 | 0.11 | 15  |
| 1 F26F4.10a;F26F4.10c            | RAYEYVVK           | 13  | 2019  | 1.08 | 0.12 | 11  |
| 10 F26F4.10a;F26F4.10c           | RAYEYVVK           | 13  | 1977  | 1.08 | 0.12 | 11  |
| 10 F26F4.10a;F26F4.10c           | RAYEYVVK           | 17  | 2172  | 1.10 | 0.09 | 8   |
| 22 F26H11.4                      | GLLRNVAK           | 10  | 4289  | 0.58 | 0.72 | 125 |
| 22 F26H9.5                       | QQAITPSVFSYK       | 28  | 2687  | 0.56 | 0.15 | 28  |
| 22 F26H9.5                       | DHGVVFVFGGAQK      | 36  | 6127  | 0.59 | 0.16 | 27  |
| 22 F26H9.5                       | LPEEVLLK           | 35  | 15535 | 0.64 | 0.08 | 12  |
| 22 F26H9.5                       | QQAITPSVFSYK       | 13  | 1071  | 0.65 | 0.15 | 23  |
| 1 F26H9.5                        | DHGVVFVFGGAQK      | 14  | 8135  | 0.66 | 0.11 | 17  |
| 22 F26H9.5                       | DHGVVFVFGGAQK      | 34  | 5232  | 0.69 | 0.20 | 29  |
| 1 F26H9.5                        | DHGVVFVFGGAQK      | 16  | 1356  | 0.71 | 0.23 | 33  |
| 7 F26H9.5                        | DHGVVFVFGGAQK      | 35  | 5003  | 0.71 | 0.16 | 23  |
| 22 F26H9.5                       | LPEEVLLK           | 46  | 16503 | 0.71 | 0.11 | 15  |
| 22 F26H9.5                       | GGLQAIYELNLQK      | 54  | 3597  | 0.76 | 0.26 | 34  |
| 22 F26H9.5                       | GGLQAIYELNLQK      | 45  | 2608  | 0.78 | 0.25 | 32  |
| 1 F26H9.5                        | DHGVVFVFGGAQK      | 19  | 5108  | 0.84 | 0.16 | 19  |
| 7 F26H9.5                        | DHGVVFVFGGAQK      | 25  | 5180  | 0.85 | 0.16 | 18  |
| 7 F26H9.5                        | QQAITPSVFSYK       | 27  | 2446  | 0.85 | 0.13 | 15  |
| 22 F26H9.5                       | DHGVVFVFGGAQK      | 35  | 3897  | 0.91 | 0.06 | 7   |
| 1 F26H9.5                        | DHGVVFVFGGAQK      | 15  | 1311  | 0.92 | 0.12 | 13  |
| 22 F26H9.5                       | GGLQAIYELNLQK      | 60  | 4960  | 1.00 | 0.22 | 22  |
| 1 F26H9.5                        | LPEEVLLK           | 32  | 7679  | 1.02 | 0.04 | 4   |
| 10 F26H9.5                       | GDHEHADYIVTGAWSSK  | 18  | 3672  | 1.03 | 0.25 | 24  |
| 1 F26H9.5                        | DHGVVFVFGGAQK      | 43  | 11471 | 1.04 | 0.11 | 10  |
| 22 F26H9.5                       | DHGVVFVFGGAQK      | 43  | 33322 | 1.07 | 0.15 | 14  |
| 22 F26H9.5                       | DHGVVFVFGGAQK      | 17  | 3915  | 1.08 | 0.17 | 16  |
| 7 F26H9.5                        | QQAITPSVFSYK       | 11  | 5715  | 1.14 | 0.14 | 12  |
| 22 F26H9.5                       | DHGVVFVFGGAQK      | 39  | 43047 | 1.16 | 0.13 | 11  |
| 22 F26H9.5                       | GDHEHADYIVTGAWSSK  | 15  | 7347  | 1.18 | 0.12 | 10  |
| 10 F26H9.5                       | LPEEVLLK           | 16  | 8659  | 1.20 | 0.09 | 8   |
| 10 F26H9.5                       | DHGVVFVFGGAQK      | 30  | 16950 | 1.21 | 0.22 | 18  |
| 10 F26H9.5                       | DHGVVFVFGGAQK      | 14  | 4179  | 1.21 | 0.13 | 11  |
| 7 F26H9.5                        | QQAITPSVFSYK       | 28  | 10206 | 1.26 | 0.03 | 2   |
| 22 F26H9.5                       | GSIERNMISLK        | 47  | 8283  | 1.29 | 0.07 | 5   |
| 1 F26H9.5                        | DHGVVFVFGGAQK      | 29  | 7658  | 1.32 | 0.15 | 11  |
| 7 F26H9.5                        | GGLQAIYELNLQK      | 48  | 2413  | 1.34 | 0.29 | 21  |
| 22 F26H9.5                       | GSIERNMISLK        | 37  | 6990  | 1.35 | 0.09 | 6   |
| 22 F26H9.5                       | DHGVVFVFGGAQK      | 17  | 5913  | 1.39 | 0.25 | 18  |
| 7 F26H9.5                        | DHGVVFVFGGAQK      | 41  | 12076 | 1.40 | 0.10 | 7   |
| 10 F26H9.5                       | GGLQAIYELNLQK      | 33  | 1623  | 1.42 | 0.33 | 23  |
| 10 F26H9.5                       | QQAITPSVFSYK       | 39  | 6853  | 1.49 | 0.20 | 13  |
| 10 F26H9.5                       | LPEEVLLK           | 15  | 5945  | 1.52 | 0.16 | 11  |
| 7 F26H9.5                        | LPEEVLLK           | 17  | 7932  | 1.53 | 0.11 | 7   |
| 22 F26H9.5                       | QQAITPSVFSYK       | 17  | 8766  | 1.54 | 0.08 | 5   |
| 7 F26H9.5                        | GSIERNMISLK        | 18  | 3496  | 1.61 | 0.09 | 6   |
| 10 F26H9.5                       | GSIERNMISLK        | 33  | 5190  | 1.75 | 0.21 | 12  |
| 10 F26H9.5                       | GSIERNMISLK        | 23  | 5064  | 1.76 | 0.11 | 6   |
| 7 F26H9.5                        | DHGVVFVFGGAQK      | 25  | 6631  | 1.78 | 0.15 | 8   |
| 22 F26H9.5                       | LPEEVLLK           | 10  | 10376 | 1.82 | 0.13 | 7   |
| 7 F26H9.5                        | GSIERNMISLK        | 11  | 2806  | 1.87 | 0.13 | 7   |
| 22 F26H9.5                       | GGLQAIYELNLQK      | 49  | 3445  | 2.38 | 0.36 | 15  |
| 10 F26H9.6                       | LVLLGESAVGK        | 74  | 3648  | 0.63 | 0.30 | 47  |
| 1 F26H9.6                        | TSMNVNDIFMAIAK     | 20  | 416   | 1.04 | 0.23 | 22  |
| 22 F26H9.6                       | LVLLGESAVGK        | 49  | 3088  | 1.63 | 0.13 | 8   |
| 1 F27C1.6                        | HRGQNQK            | 11  | 2323  | 0.30 | 0.59 | 196 |
| 10 F27C1.7b                      | FQEFVLDPTLK        | 34  | 1686  | 0.90 | 0.32 | 36  |
| 22 F27C1.7b;F27C1.7a             | FQEFVLDPTLK        | 10  | 1490  | 2.12 | 0.10 | 5   |
| 22 F27C1.7b;F27C1.7a             | FQEFVLDPTLK        | 14  | 2155  | 2.21 | 0.19 | 9   |
| 1 F27D4.1                        | RVLVAQDEK          | 19  | 2103  | 0.13 | 0.06 | 46  |
| 1 F27D4.1                        | VVVSGBRGLK         | 17  | 1949  | 0.14 | 0.33 | 243 |
| 10 F27D4.1                       | RVLVAQDEK          | 16  | 8398  | 0.19 | 0.03 | 16  |
| 10 F27D4.1                       | EGGSGAVENAPSADIK   | 67  | 9911  | 0.21 | 0.19 | 88  |
| 22 F27D4.1                       | LGNEVSVLVTGANATK   | 83  | 3049  | 0.23 | 0.27 | 118 |
| 10 F27D4.1                       | RVLVAQDEK          | 13  | 6683  | 0.24 | 0.20 | 85  |
| 10 F27D4.1                       | LIYDLADK           | 15  | 518   | 0.25 | 0.20 | 83  |
| 10 F27D4.1                       | LAPITLNAITAASK     | 112 | 4478  | 0.25 | 0.16 | 65  |
| 7 F27D4.1                        | LGNEVSVLVTGANATK   | 64  | 2639  | 0.26 | 0.15 | 57  |
| 7 F27D4.1                        | VVVSGBRGLK         | 38  | 11907 | 0.27 | 0.30 | 111 |
| 7 F27D4.1                        | VVVSGBRGLK         | 30  | 14741 | 0.27 | 0.12 | 44  |
| 22 F27D4.1                       | LGNEVSVLVTGANATK   | 72  | 3256  | 0.28 | 0.19 | 69  |
| 1 F27D4.1                        | EGGSGAVENAPSADIK   | 93  | 3818  | 0.28 | 0.50 | 179 |
| 22 F27D4.1                       | LIYDLADK           | 43  | 1845  | 0.29 | 0.20 | 69  |
| 10 F27D4.1                       | LIYDLADK           | 30  | 1750  | 0.30 | 0.08 | 29  |
| 1 F27D4.1                        | LAPITLNAITAASK     | 39  | 865   | 0.30 | 0.29 | 96  |
| 10 F27D4.1                       | DPDAPIFQVADIGLK    | 66  | 3234  | 0.30 | 0.13 | 43  |
| 7 F27D4.1                        | LGNEVSVLVTGANATK   | 61  | 2653  | 0.31 | 0.12 | 41  |

|            |                              |     |       |      |      |    |
|------------|------------------------------|-----|-------|------|------|----|
| 22 F27D4.1 | LGNEVSVLVTGANATK             | 77  | 1587  | 0.33 | 0.16 | 49 |
| 10 F27D4.1 | LGNEVSVLVTGANATK             | 52  | 781   | 0.33 | 0.15 | 45 |
| 1 F27D4.1  | LGNEVSVLVTGANATK             | 28  | 419   | 0.33 | 0.20 | 62 |
| 1 F27D4.1  | VVVS GGRGLK                  | 39  | 1950  | 0.33 | 0.18 | 54 |
| 10 F27D4.1 | LGNEVSVLVTGANATK             | 80  | 1987  | 0.34 | 0.19 | 56 |
| 22 F27D4.1 | EGGSGAVENAPSADIK             | 82  | 11178 | 0.35 | 0.30 | 86 |
| 7 F27D4.1  | NNLPERVAPVILASQK             | 38  | 1212  | 0.36 | 0.06 | 17 |
| 1 F27D4.1  | VVVS GGRGLK                  | 43  | 2642  | 0.36 | 0.18 | 50 |
| 10 F27D4.1 | DPDAPIFQVADIGLK              | 71  | 1898  | 0.37 | 0.06 | 15 |
| 10 F27D4.1 | LIYDLADK                     | 51  | 2353  | 0.38 | 0.12 | 32 |
| 22 F27D4.1 | LGNEVSVLVTGANATK             | 77  | 1943  | 0.38 | 0.22 | 59 |
| 10 F27D4.1 | LGNEVSVLVTGANATK             | 85  | 2298  | 0.39 | 0.14 | 36 |
| 22 F27D4.1 | LIYDLADK                     | 41  | 1609  | 0.40 | 0.32 | 81 |
| 10 F27D4.1 | LLTFRGTSFEPAK                | 11  | 2565  | 0.42 | 0.03 | 7  |
| 7 F27D4.1  | SERPDLATAK                   | 19  | 3145  | 0.42 | 0.17 | 41 |
| 10 F27D4.1 | VVVS GGRGLK                  | 50  | 6173  | 0.43 | 0.10 | 23 |
| 1 F27D4.1  | VVVS GGRGLK                  | 22  | 6881  | 0.43 | 0.28 | 65 |
| 10 F27D4.1 | LGNEVSVLVTGANATK             | 55  | 3159  | 0.45 | 0.18 | 40 |
| 10 F27D4.1 | LLTFRGTSFEPAK                | 17  | 2424  | 0.45 | 0.28 | 63 |
| 22 F27D4.1 | LAPITLNAITAASK               | 46  | 1294  | 0.45 | 0.08 | 19 |
| 22 F27D4.1 | RVLVAQDEK                    | 23  | 8614  | 0.45 | 0.11 | 24 |
| 1 F27D4.1  | VVVS GGRGLK                  | 22  | 5674  | 0.46 | 0.09 | 19 |
| 22 F27D4.1 | EGGSGAVENAPSADIK             | 97  | 15550 | 0.46 | 0.24 | 52 |
| 1 F27D4.1  | LGNEVSVLVTGANATK             | 26  | 453   | 0.48 | 0.12 | 26 |
| 22 F27D4.1 | LAPITLNAITAASK               | 47  | 1794  | 0.49 | 0.19 | 40 |
| 10 F27D4.1 | LGNEVSVLVTGANATK             | 43  | 1984  | 0.49 | 0.14 | 28 |
| 22 F27D4.1 | EGGSGAVENAPSADIK             | 95  | 16082 | 0.49 | 0.29 | 58 |
| 22 F27D4.1 | VVVS GGRGLK                  | 23  | 6721  | 0.50 | 0.22 | 44 |
| 7 F27D4.1  | LIYDLADK                     | 33  | 1657  | 0.50 | 0.29 | 58 |
| 22 F27D4.1 | VVVS GGRGLK                  | 25  | 5205  | 0.51 | 0.15 | 30 |
| 10 F27D4.1 | LLTFRGTSFEPAK                | 14  | 2942  | 0.51 | 0.29 | 58 |
| 10 F27D4.1 | LAPITLNAITAASK               | 25  | 1175  | 0.51 | 0.20 | 40 |
| 22 F27D4.1 | LIYDLADK                     | 30  | 1021  | 0.51 | 0.27 | 53 |
| 1 F27D4.1  | EGGSGAVENAPSADIK             | 46  | 2944  | 0.52 | 0.29 | 56 |
| 10 F27D4.1 | VVVS GGRGLK                  | 19  | 8874  | 0.52 | 0.12 | 22 |
| 22 F27D4.1 | LLTFRGTSFEPAK                | 28  | 3401  | 0.53 | 0.09 | 17 |
| 22 F27D4.1 | LAPITLNAITAASK               | 38  | 1574  | 0.53 | 0.20 | 37 |
| 10 F27D4.1 | VVVS GGRGLK                  | 45  | 4460  | 0.54 | 0.21 | 39 |
| 7 F27D4.1  | NNLPERVAPVILASQK             | 25  | 2377  | 0.54 | 0.21 | 39 |
| 22 F27D4.1 | SERPDLATAK                   | 27  | 3681  | 0.54 | 0.07 | 13 |
| 7 F27D4.1  | LLTFRGTSFEPAK                | 25  | 2064  | 0.55 | 0.20 | 37 |
| 22 F27D4.1 | TDLSEFLGQELSK                | 43  | 1135  | 0.55 | 0.14 | 26 |
| 7 F27D4.1  | LIYDLADK                     | 35  | 2459  | 0.55 | 0.17 | 30 |
| 10 F27D4.1 | LIYDLADK                     | 18  | 1565  | 0.55 | 0.15 | 28 |
| 10 F27D4.1 | VVVS GGRGLK                  | 31  | 8650  | 0.56 | 0.17 | 30 |
| 22 F27D4.1 | EGGSGAVENAPSADIK             | 76  | 5139  | 0.56 | 0.25 | 45 |
| 22 F27D4.1 | LIYDLADK                     | 22  | 1229  | 0.56 | 0.11 | 19 |
| 10 F27D4.1 | TDLSEFLGQELSK                | 35  | 2814  | 0.56 | 0.15 | 27 |
| 1 F27D4.1  | NNLPERVAPVILASQK             | 32  | 1299  | 0.56 | 0.14 | 25 |
| 10 F27D4.1 | EGGSGAVENAPSADIK             | 62  | 11497 | 0.58 | 0.57 | 98 |
| 7 F27D4.1  | EGGSGAVENAPSADIK             | 86  | 12101 | 0.59 | 0.06 | 9  |
| 10 F27D4.1 | LGNEVSVLVTGANATK             | 44  | 924   | 0.59 | 0.06 | 10 |
| 10 F27D4.1 | LIYDLADK                     | 23  | 1421  | 0.59 | 0.35 | 59 |
| 10 F27D4.1 | DPDAPIFQVADIGLK              | 60  | 1659  | 0.60 | 0.17 | 28 |
| 10 F27D4.1 | DPDAPIFQVADIGLK              | 73  | 2955  | 0.61 | 0.14 | 23 |
| 1 F27D4.1  | LGNEVSVLVTGANATK             | 37  | 806   | 0.61 | 0.17 | 28 |
| 7 F27D4.1  | LIYDLADK                     | 26  | 1977  | 0.61 | 0.26 | 43 |
| 10 F27D4.1 | LIYDLADK                     | 18  | 1347  | 0.62 | 0.13 | 21 |
| 7 F27D4.1  | SERPDLATAK                   | 11  | 1583  | 0.65 | 0.10 | 16 |
| 22 F27D4.1 | LLTFRGTSFEPAK                | 25  | 1666  | 0.66 | 0.24 | 36 |
| 10 F27D4.1 | LIYDLADK                     | 27  | 1617  | 0.66 | 0.06 | 8  |
| 7 F27D4.1  | VVVS GGRGLK                  | 29  | 4841  | 0.66 | 0.11 | 17 |
| 10 F27D4.1 | SERPDLATAK                   | 18  | 8978  | 0.66 | 0.13 | 20 |
| 10 F27D4.1 | LGNEVSVLVTGANATK             | 60  | 1634  | 0.66 | 0.17 | 26 |
| 7 F27D4.1  | LIYDLADK                     | 24  | 1820  | 0.67 | 0.18 | 28 |
| 22 F27D4.1 | LGNEVSVLVTGANATK             | 70  | 1480  | 0.67 | 0.20 | 30 |
| 10 F27D4.1 | LLTFRGTSFEPAK                | 13  | 1743  | 0.67 | 0.30 | 45 |
| 10 F27D4.1 | LAPITLNAITAASK               | 85  | 2087  | 0.67 | 0.11 | 16 |
| 7 F27D4.1  | VVVS GGRGLK                  | 29  | 2786  | 0.68 | 0.10 | 14 |
| 22 F27D4.1 | TDLSEFLGQELSK                | 40  | 820   | 0.69 | 0.23 | 34 |
| 1 F27D4.1  | LAPITLNAITAASK               | 43  | 754   | 0.69 | 0.21 | 31 |
| 10 F27D4.1 | TDLSEFLGQELSK                | 35  | 2215  | 0.70 | 0.12 | 16 |
| 1 F27D4.1  | LIYDLADK                     | 28  | 872   | 0.70 | 0.21 | 30 |
| 1 F27D4.1  | LAPITLNAITAASK               | 30  | 748   | 0.71 | 0.20 | 28 |
| 10 F27D4.1 | VVVS GGRGLK                  | 27  | 5718  | 0.71 | 0.14 | 20 |
| 22 F27D4.1 | EGGSGAVENAPSADIK             | 82  | 5967  | 0.72 | 0.14 | 19 |
| 7 F27D4.1  | EGGSGAVENAPSADIK             | 87  | 6512  | 0.72 | 0.15 | 21 |
| 1 F27D4.1  | EGGSGAVENAPSADIK             | 15  | 2378  | 0.73 | 0.29 | 40 |
| 1 F27D4.1  | NNLPERVAPVILASQK             | 24  | 2868  | 0.73 | 0.12 | 17 |
| 22 F27D4.1 | LGNEVSVLVTGANATK             | 53  | 920   | 0.74 | 0.25 | 34 |
| 1 F27D4.1  | NNLPERVAPVILASQK             | 34  | 1509  | 0.74 | 0.14 | 19 |
| 22 F27D4.1 | EGGSGAVENAPSADIK             | 92  | 11015 | 0.74 | 0.12 | 16 |
| 1 F27D4.1  | TDLSEFLGQELSK                | 23  | 762   | 0.74 | 0.15 | 20 |
| 10 F27D4.1 | LLTFRGTSFEPAK                | 28  | 3126  | 0.75 | 0.17 | 23 |
| 22 F27D4.1 | VVVS GGRGLK                  | 39  | 7135  | 0.75 | 0.12 | 16 |
| 22 F27D4.1 | LGNEVSVLVTGANATK             | 31  | 935   | 0.76 | 0.17 | 23 |
| 10 F27D4.1 | LAPITLNAITAASK               | 81  | 1683  | 0.77 | 0.16 | 20 |
| 22 F27D4.1 | VVVS GGRGLK                  | 23  | 2749  | 0.77 | 0.19 | 24 |
| 22 F27D4.1 | LLTFRGTSFEPAK                | 16  | 2142  | 0.78 | 0.05 | 6  |
| 22 F27D4.1 | LGAGVGASRAAVDAGYVPNDMQVGQTGK | 33  | 3934  | 0.78 | 0.11 | 13 |
| 7 F27D4.1  | LGAGVGASRAAVDAGYVPNDMQVGQTGK | 28  | 3591  | 0.79 | 0.11 | 14 |
| 22 F27D4.1 | LLTFRGTSFEPAK                | 22  | 3320  | 0.79 | 0.10 | 13 |
| 22 F27D4.1 | LGNEVSVLVTGANATK             | 73  | 2080  | 0.81 | 0.13 | 16 |
| 10 F27D4.1 | LLTFRGTSFEPAK                | 17  | 2644  | 0.82 | 0.08 | 10 |
| 22 F27D4.1 | LLTFRGTSFEPAK                | 30  | 3041  | 0.83 | 0.04 | 5  |
| 22 F27D4.1 | LGAGVGASRAAVDAGYVPNDMQVGQTGK | 32  | 6184  | 0.83 | 0.13 | 16 |
| 22 F27D4.1 | VVVS GGRGLK                  | 22  | 1577  | 0.84 | 0.12 | 15 |
| 22 F27D4.1 | LAPITLNAITAASK               | 51  | 1811  | 0.84 | 0.13 | 15 |
| 10 F27D4.1 | VVVS GGRGLK                  | 22  | 5811  | 0.84 | 0.10 | 12 |
| 22 F27D4.1 | EGGSGAVENAPSADIK             | 107 | 8365  | 0.85 | 0.26 | 31 |
| 10 F27D4.1 | LAPITLNAITAASK               | 51  | 1398  | 0.85 | 0.14 | 16 |

|            |                              |    |       |      |      |    |
|------------|------------------------------|----|-------|------|------|----|
| 22 F27D4.1 | LLTFRGTSFEPAK                | 26 | 1217  | 0.86 | 0.16 | 18 |
| 7 F27D4.1  | LGAGVGASRAAVDAGYVPNDMQVGQTGK | 27 | 3855  | 0.86 | 0.17 | 19 |
| 22 F27D4.1 | LAPITLNAITAASK               | 46 | 1919  | 0.87 | 0.18 | 21 |
| 10 F27D4.1 | LAPITLNAITAASK               | 49 | 1580  | 0.87 | 0.07 | 8  |
| 1 F27D4.1  | NNLPERVAPVILASQK             | 37 | 5071  | 0.88 | 0.14 | 15 |
| 10 F27D4.1 | VVVSGBRGLK                   | 12 | 4403  | 0.89 | 0.11 | 13 |
| 22 F27D4.1 | LGAGVGASRAAVDAGYVPNDMQVGQTGK | 23 | 6111  | 0.91 | 0.18 | 19 |
| 10 F27D4.1 | RVLVAQDEK                    | 10 | 10198 | 0.92 | 0.15 | 17 |
| 22 F27D4.1 | VVVSGBRGLK                   | 29 | 7321  | 0.92 | 0.11 | 12 |
| 10 F27D4.1 | LAPITLNAITAASK               | 59 | 1903  | 0.93 | 0.13 | 14 |
| 22 F27D4.1 | TDLSEFLGQELSK                | 37 | 1278  | 0.93 | 0.24 | 26 |
| 1 F27D4.1  | LAPITLNAITAASK               | 20 | 758   | 0.94 | 0.13 | 14 |
| 10 F27D4.1 | LIYDLADK                     | 47 | 3009  | 0.94 | 0.09 | 10 |
| 1 F27D4.1  | VVVSGBRGLK                   | 42 | 7526  | 0.94 | 0.11 | 11 |
| 10 F27D4.1 | LAPITLNAITAASK               | 67 | 2392  | 0.94 | 0.16 | 17 |
| 22 F27D4.1 | LAPITLNAITAASK               | 51 | 1717  | 0.95 | 0.12 | 12 |
| 22 F27D4.1 | LGNEVSVLVTGANATK             | 75 | 1928  | 0.95 | 0.14 | 14 |
| 10 F27D4.1 | LLTFRGTSFEPAK                | 42 | 4922  | 0.95 | 0.03 | 3  |
| 1 F27D4.1  | LAPITLNAITAASK               | 72 | 1215  | 0.96 | 0.24 | 25 |
| 22 F27D4.1 | VVVSGBRGLK                   | 41 | 5658  | 0.96 | 0.19 | 20 |
| 22 F27D4.1 | LLTFRGTSFEPAK                | 16 | 1479  | 0.96 | 0.25 | 26 |
| 1 F27D4.1  | LAPITLNAITAASK               | 36 | 638   | 0.96 | 0.24 | 25 |
| 22 F27D4.1 | LGAGVGASRAAVDAGYVPNDMQVGQTGK | 21 | 3595  | 0.97 | 0.08 | 8  |
| 22 F27D4.1 | LLTFRGTSFEPAK                | 12 | 1844  | 0.98 | 0.35 | 35 |
| 22 F27D4.1 | LIYDLADK                     | 27 | 993   | 0.98 | 0.18 | 18 |
| 10 F27D4.1 | LGAGVGASRAAVDAGYVPNDMQVGQTGK | 28 | 5645  | 0.98 | 0.15 | 15 |
| 10 F27D4.1 | LAPITLNAITAASK               | 65 | 1826  | 0.98 | 0.12 | 12 |
| 1 F27D4.1  | LAPITLNAITAASK               | 49 | 1318  | 0.99 | 0.20 | 20 |
| 1 F27D4.1  | TDLSEFLGQELSK                | 22 | 791   | 0.99 | 0.25 | 25 |
| 1 F27D4.1  | LGNEVSVLVTGANATK             | 58 | 1287  | 1.00 | 0.21 | 21 |
| 1 F27D4.1  | VVVSGBRGLK                   | 27 | 1500  | 1.00 | 0.11 | 11 |
| 7 F27D4.1  | LGNEVSVLVTGANATK             | 84 | 3816  | 1.01 | 0.12 | 12 |
| 10 F27D4.1 | NNLPERVAPVILASQK             | 30 | 5872  | 1.01 | 0.13 | 13 |
| 22 F27D4.1 | LIYDLADK                     | 26 | 1019  | 1.02 | 0.15 | 15 |
| 22 F27D4.1 | LLTFRGTSFEPAK                | 28 | 2567  | 1.02 | 0.08 | 8  |
| 7 F27D4.1  | LGAGVGASRAAVDAGYVPNDMQVGQTGK | 40 | 8786  | 1.03 | 0.10 | 10 |
| 22 F27D4.1 | DPDAPIFQVADIGLK              | 54 | 1547  | 1.04 | 0.19 | 18 |
| 7 F27D4.1  | LGNEVSVLVTGANATK             | 80 | 2216  | 1.06 | 0.06 | 5  |
| 22 F27D4.1 | LGNEVSVLVTGANATK             | 86 | 2132  | 1.06 | 0.16 | 16 |
| 22 F27D4.1 | NNLPERVAPVILASQK             | 42 | 1267  | 1.07 | 0.23 | 21 |
| 22 F27D4.1 | LLTFRGTSFEPAK                | 30 | 1744  | 1.07 | 0.20 | 19 |
| 1 F27D4.1  | TDLSEFLGQELSK                | 10 | 758   | 1.08 | 0.11 | 10 |
| 7 F27D4.1  | LGNEVSVLVTGANATK             | 81 | 2534  | 1.09 | 0.11 | 10 |
| 10 F27D4.1 | LIYDLADK                     | 48 | 2500  | 1.10 | 0.17 | 16 |
| 7 F27D4.1  | LLTFRGTSFEPAK                | 12 | 3130  | 1.11 | 0.14 | 13 |
| 1 F27D4.1  | TDLSEFLGQELSK                | 31 | 985   | 1.11 | 0.16 | 15 |
| 22 F27D4.1 | DPDAPIFQVADIGLK              | 44 | 1479  | 1.12 | 0.12 | 11 |
| 22 F27D4.1 | DPDAPIFQVADIGLK              | 38 | 1922  | 1.12 | 0.22 | 19 |
| 22 F27D4.1 | LLTFRGTSFEPAK                | 24 | 2156  | 1.13 | 0.24 | 22 |
| 1 F27D4.1  | LGNEVSVLVTGANATK             | 55 | 712   | 1.14 | 0.05 | 4  |
| 1 F27D4.1  | LLTFRGTSFEPAK                | 20 | 2134  | 1.14 | 0.07 | 6  |
| 22 F27D4.1 | LIYDLADK                     | 18 | 1544  | 1.15 | 0.15 | 13 |
| 1 F27D4.1  | LGAGVGASRAAVDAGYVPNDMQVGQTGK | 34 | 4439  | 1.16 | 0.12 | 11 |
| 1 F27D4.1  | EGGSGAVENAPSADIK             | 23 | 2119  | 1.17 | 0.22 | 19 |
| 10 F27D4.1 | LAPITLNAITAASK               | 50 | 1735  | 1.18 | 0.12 | 10 |
| 10 F27D4.1 | NNLPERVAPVILASQK             | 31 | 2309  | 1.18 | 0.08 | 7  |
| 1 F27D4.1  | VVVSGBRGLK                   | 24 | 5514  | 1.19 | 0.07 | 6  |
| 7 F27D4.1  | LGNEVSVLVTGANATK             | 72 | 1799  | 1.19 | 0.14 | 12 |
| 10 F27D4.1 | LLTFRGTSFEPAK                | 12 | 1782  | 1.20 | 0.08 | 7  |
| 1 F27D4.1  | LLTFRGTSFEPAK                | 12 | 2606  | 1.21 | 0.05 | 4  |
| 22 F27D4.1 | VVVSGBRGLK                   | 17 | 4976  | 1.22 | 0.10 | 8  |
| 22 F27D4.1 | DPDAPIFQVADIGLK              | 63 | 1942  | 1.22 | 0.25 | 21 |
| 10 F27D4.1 | VVVSGBRGLK                   | 33 | 12521 | 1.24 | 0.10 | 8  |
| 7 F27D4.1  | LIYDLADK                     | 23 | 1409  | 1.24 | 0.17 | 14 |
| 7 F27D4.1  | LIYDLADK                     | 26 | 970   | 1.26 | 0.18 | 15 |
| 1 F27D4.1  | SERPDLATAK                   | 11 | 3217  | 1.27 | 0.15 | 12 |
| 10 F27D4.1 | VVVSGBRGLK                   | 26 | 8907  | 1.28 | 0.09 | 7  |
| 22 F27D4.1 | LGAGVGASRAAVDAGYVPNDMQVGQTGK | 27 | 4156  | 1.30 | 0.09 | 7  |
| 7 F27D4.1  | LLTFRGTSFEPAK                | 11 | 2314  | 1.30 | 0.16 | 12 |
| 1 F27D4.1  | LIYDLADK                     | 15 | 415   | 1.31 | 0.14 | 11 |
| 10 F27D4.1 | VVVSGBRGLK                   | 41 | 9462  | 1.31 | 0.10 | 8  |
| 10 F27D4.1 | LLTFRGTSFEPAK                | 11 | 2366  | 1.32 | 0.16 | 12 |
| 7 F27D4.1  | SERPDLATAK                   | 12 | 2450  | 1.33 | 0.05 | 4  |
| 22 F27D4.1 | LAPITLNAITAASK               | 85 | 2774  | 1.33 | 0.15 | 11 |
| 22 F27D4.1 | LLTFRGTSFEPAK                | 16 | 3440  | 1.34 | 0.11 | 9  |
| 1 F27D4.1  | LLTFRGTSFEPAK                | 14 | 2458  | 1.36 | 0.13 | 10 |
| 7 F27D4.1  | LGAGVGASRAAVDAGYVPNDMQVGQTGK | 21 | 6057  | 1.36 | 0.14 | 10 |
| 22 F27D4.1 | LLTFRGTSFEPAK                | 18 | 1990  | 1.37 | 0.09 | 7  |
| 22 F27D4.1 | LLTFRGTSFEPAK                | 15 | 1894  | 1.37 | 0.36 | 26 |
| 10 F27D4.1 | LGNEVSVLVTGANATK             | 42 | 989   | 1.38 | 0.18 | 13 |
| 7 F27D4.1  | LAPITLNAITAASK               | 87 | 6749  | 1.43 | 0.13 | 9  |
| 7 F27D4.1  | LAPITLNAITAASK               | 90 | 6368  | 1.44 | 0.14 | 10 |
| 10 F27D4.1 | VVVSGBRGLK                   | 37 | 8221  | 1.49 | 0.18 | 12 |
| 7 F27D4.1  | NNLPERVAPVILASQK             | 32 | 1354  | 1.52 | 0.21 | 14 |
| 22 F27D4.1 | LLTFRGTSFEPAK                | 14 | 2887  | 1.52 | 0.17 | 11 |
| 7 F27D4.1  | NNLPERVAPVILASQK             | 20 | 2072  | 1.52 | 0.21 | 14 |
| 7 F27D4.1  | LLTFRGTSFEPAK                | 17 | 1641  | 1.52 | 0.46 | 30 |
| 7 F27D4.1  | LIYDLADK                     | 39 | 2255  | 1.54 | 0.07 | 5  |
| 7 F27D4.1  | LLTFRGTSFEPAK                | 26 | 4833  | 1.56 | 0.20 | 13 |
| 10 F27D4.1 | DPDAPIFQVADIGLK              | 20 | 872   | 1.57 | 0.42 | 27 |
| 7 F27D4.1  | LLTFRGTSFEPAK                | 21 | 4422  | 1.58 | 0.17 | 11 |
| 22 F27D4.1 | DPDAPIFQVADIGLK              | 41 | 1737  | 1.59 | 0.17 | 11 |
| 1 F27D4.1  | LGNEVSVLVTGANATK             | 79 | 2311  | 1.59 | 0.16 | 10 |
| 22 F27D4.1 | VVVSGBRGLK                   | 29 | 5133  | 1.60 | 0.09 | 6  |
| 22 F27D4.1 | NNLPERVAPVILASQK             | 30 | 1118  | 1.63 | 0.19 | 11 |
| 10 F27D4.1 | LLTFRGTSFEPAK                | 20 | 4693  | 1.64 | 0.10 | 6  |
| 1 F27D4.1  | LAPITLNAITAASK               | 76 | 1309  | 1.66 | 0.22 | 13 |
| 1 F27D4.1  | LGAGVGASRAAVDAGYVPNDMQVGQTGK | 28 | 4352  | 1.67 | 0.19 | 11 |
| 1 F27D4.1  | VVVSGBRGLK                   | 48 | 3711  | 1.67 | 0.15 | 9  |
| 7 F27D4.1  | NNLPERVAPVILASQK             | 27 | 814   | 1.69 | 0.17 | 10 |
| 22 F27D4.1 | LAPITLNAITAASK               | 68 | 1636  | 1.71 | 0.21 | 12 |

|            |                    |    |       |      |      |    |
|------------|--------------------|----|-------|------|------|----|
| 7 F27D4.1  | VVVS GGRGLK        | 55 | 8895  | 1.74 | 0.18 | 10 |
| 7 F27D4.1  | LIYDLADK           | 35 | 1950  | 1.75 | 0.13 | 8  |
| 22 F27D4.1 | DPDAPIFQVADIGLK    | 44 | 1504  | 1.77 | 0.10 | 6  |
| 7 F27D4.1  | LLTFRGTSFEPAK      | 17 | 1549  | 1.77 | 0.30 | 17 |
| 7 F27D4.1  | LIYDLADK           | 17 | 1366  | 1.77 | 0.16 | 9  |
| 22 F27D4.1 | VVVS GGRGLK        | 21 | 3415  | 1.78 | 0.05 | 3  |
| 10 F27D4.1 | TDLSEFLGQELSK      | 36 | 1885  | 1.78 | 0.16 | 9  |
| 1 F27D4.1  | LGNEVSVLVTGANATK   | 86 | 3035  | 1.80 | 0.07 | 4  |
| 10 F27D4.1 | LIYDLADK           | 27 | 1891  | 1.84 | 0.08 | 4  |
| 1 F27D4.1  | VVVS GGRGLK        | 35 | 2598  | 1.88 | 0.16 | 8  |
| 7 F27D4.1  | LLTFRGTSFEPAK      | 13 | 1804  | 1.89 | 0.09 | 5  |
| 7 F27D4.1  | VVVS GGRGLK        | 47 | 4857  | 1.91 | 0.14 | 7  |
| 10 F27D4.1 | LLTFRGTSFEPAK      | 27 | 4522  | 1.95 | 0.10 | 5  |
| 10 F27D4.1 | LIYDLADK           | 36 | 1393  | 1.97 | 0.17 | 8  |
| 1 F27D4.1  | LAPITLNAITAASK     | 44 | 879   | 2.02 | 0.16 | 8  |
| 7 F27D4.1  | VVVS GGRGLK        | 41 | 6975  | 2.04 | 0.18 | 9  |
| 22 F27D4.1 | VVVS GGRGLK        | 45 | 4142  | 2.13 | 0.16 | 7  |
| 22 F27D4.1 | VVVS GGRGLK        | 42 | 4293  | 2.14 | 0.12 | 5  |
| 7 F27D4.1  | LLTFRGTSFEPAK      | 16 | 1615  | 2.21 | 0.11 | 5  |
| 10 F27D4.1 | TDLSEFLGQELSK      | 59 | 1954  | 2.23 | 0.11 | 5  |
| 7 F27D4.1  | VVVS GGRGLK        | 43 | 3692  | 2.33 | 0.15 | 7  |
| 10 F27D4.1 | VVVS GGRGLK        | 52 | 10926 | 2.34 | 0.20 | 9  |
| 10 F27D4.1 | DPDAPIFQVADIGLK    | 64 | 2775  | 2.38 | 0.14 | 6  |
| 22 F27D4.1 | VVVS GGRGLK        | 47 | 4562  | 2.49 | 0.10 | 4  |
| 10 F27D4.1 | LGNEVSVLVTGANATK   | 60 | 1076  | 2.58 | 0.24 | 9  |
| 7 F27D4.1  | LIYDLADK           | 25 | 1694  | 2.81 | 0.13 | 5  |
| 1 F27D4.1  | LAPITLNAITAASK     | 84 | 2154  | 3.12 | 0.22 | 7  |
| 10 F27D4.1 | VVVS GGRGLK        | 27 | 8948  | 3.40 | 0.19 | 5  |
| 10 F27D4.1 | LAPITLNAITAASK     | 67 | 2082  | 3.89 | 0.19 | 5  |
| 1 F27D4.1  | LAPITLNAITAASK     | 67 | 1828  | 4.00 | 0.15 | 4  |
| 10 F27D4.5 | LVVPRGPVQAK        | 20 | 6836  | 0.54 | 0.42 | 76 |
| 10 F27D4.5 | LVVPRGPVQAK        | 16 | 3317  | 1.00 | 0.17 | 17 |
| 1 F27D9.5  | VSRDIGYPVMIK       | 14 | 1656  | 0.23 | 0.08 | 34 |
| 10 F27D9.5 | VDLSTVVLSPMPGAIK   | 16 | 717   | 0.27 | 0.11 | 39 |
| 10 F27D9.5 | MGEQAVQLAK         | 42 | 9581  | 0.29 | 0.05 | 17 |
| 10 F27D9.5 | MGEQAVQLAK         | 45 | 10123 | 0.30 | 0.09 | 32 |
| 10 F27D9.5 | LARANQFLNQNK       | 15 | 2778  | 0.30 | 0.21 | 70 |
| 1 F27D9.5  | RAGEITVLYK         | 16 | 1410  | 0.31 | 0.14 | 46 |
| 7 F27D9.5  | EQDVVIAFASALNARK   | 43 | 1524  | 0.32 | 0.17 | 53 |
| 10 F27D9.5 | YLPEVYPEGFQGTSLSPK | 52 | 3009  | 0.33 | 0.15 | 46 |
| 10 F27D9.5 | VDLSTVVLSPMPGAIK   | 18 | 1638  | 0.35 | 0.12 | 33 |
| 22 F27D9.5 | VSRDIGYPVMIK       | 22 | 3087  | 0.35 | 0.31 | 86 |
| 1 F27D9.5  | RAGEITVLYK         | 12 | 1143  | 0.36 | 0.20 | 57 |
| 10 F27D9.5 | LARANQFLNQNK       | 30 | 2167  | 0.37 | 0.12 | 34 |
| 10 F27D9.5 | VDLSTVVLSPMPGAIK   | 37 | 2871  | 0.37 | 0.14 | 39 |
| 1 F27D9.5  | FVSSLPVK           | 13 | 1066  | 0.39 | 0.16 | 42 |
| 10 F27D9.5 | EQDVVIAFASALNARK   | 58 | 2305  | 0.39 | 0.21 | 54 |
| 10 F27D9.5 | VDLSTVVLSPMPGAIK   | 15 | 1173  | 0.42 | 0.07 | 17 |
| 1 F27D9.5  | FVSSLPVK           | 10 | 808   | 0.43 | 0.18 | 41 |
| 10 F27D9.5 | EQDVVIAFASALNARK   | 70 | 2764  | 0.44 | 0.15 | 33 |
| 22 F27D9.5 | MGEQAVQLAK         | 34 | 4521  | 0.44 | 0.11 | 24 |
| 10 F27D9.5 | VDLSTVVLSPMPGAIK   | 11 | 1105  | 0.44 | 0.19 | 42 |
| 10 F27D9.5 | RAGEITVLYK         | 23 | 11138 | 0.44 | 0.07 | 16 |
| 22 F27D9.5 | EQDVVIAFASALNARK   | 49 | 1445  | 0.45 | 0.19 | 41 |
| 10 F27D9.5 | YLQYMK             | 16 | 4530  | 0.47 | 0.08 | 16 |
| 10 F27D9.5 | EQDVVIAFASALNARK   | 35 | 1481  | 0.48 | 0.18 | 38 |
| 10 F27D9.5 | YLPEVYPEGFQGTSLSPK | 35 | 2646  | 0.49 | 0.14 | 29 |
| 10 F27D9.5 | AQVRIGGK           | 10 | 3921  | 0.50 | 0.26 | 51 |
| 7 F27D9.5  | EQDVVIAFASALNARK   | 43 | 1198  | 0.50 | 0.13 | 27 |
| 22 F27D9.5 | LARANQFLNQNK       | 21 | 1333  | 0.51 | 0.21 | 41 |
| 10 F27D9.5 | RAGEITVLYK         | 17 | 11017 | 0.51 | 0.17 | 33 |
| 10 F27D9.5 | MGEQAVQLAK         | 23 | 6537  | 0.54 | 0.18 | 33 |
| 22 F27D9.5 | RAGEITVLYK         | 39 | 1609  | 0.55 | 0.10 | 18 |
| 7 F27D9.5  | EQDVVIAFASALNARK   | 66 | 3846  | 0.56 | 0.08 | 14 |
| 22 F27D9.5 | MGEQAVQLAK         | 28 | 6062  | 0.56 | 0.11 | 20 |
| 7 F27D9.5  | VDLSTVVLSPMPGAIK   | 36 | 2605  | 0.56 | 0.12 | 21 |
| 10 F27D9.5 | LARANQFLNQNK       | 23 | 1960  | 0.57 | 0.19 | 33 |
| 7 F27D9.5  | FVSSLPVK           | 16 | 3905  | 0.57 | 0.10 | 17 |
| 22 F27D9.5 | VSRDIGYPVMIK       | 24 | 2989  | 0.59 | 0.30 | 51 |
| 22 F27D9.5 | MGEQAVQLAK         | 20 | 3846  | 0.59 | 0.09 | 15 |
| 22 F27D9.5 | FVSSLPVK           | 22 | 1068  | 0.60 | 0.24 | 40 |
| 22 F27D9.5 | VDLSTVVLSPMPGAIK   | 16 | 1732  | 0.61 | 0.13 | 22 |
| 10 F27D9.5 | AQVRIGGK           | 17 | 3466  | 0.61 | 0.15 | 25 |
| 22 F27D9.5 | MGEQAVQLAK         | 25 | 4628  | 0.62 | 0.25 | 41 |
| 22 F27D9.5 | FVSSLPVK           | 21 | 825   | 0.64 | 0.20 | 31 |
| 7 F27D9.5  | EQDVVIAFASALNARK   | 43 | 1402  | 0.64 | 0.13 | 20 |
| 7 F27D9.5  | YLPEVYPEGFQGTSLSPK | 42 | 3895  | 0.65 | 0.27 | 42 |
| 10 F27D9.5 | YLQYMK             | 17 | 1157  | 0.65 | 0.19 | 30 |
| 22 F27D9.5 | FVSSLPVK           | 22 | 1005  | 0.65 | 0.23 | 35 |
| 22 F27D9.5 | LARANQFLNQNK       | 14 | 1443  | 0.65 | 0.18 | 28 |
| 7 F27D9.5  | QEAASSFGDDRMLVEK   | 33 | 4423  | 0.66 | 0.44 | 67 |
| 22 F27D9.5 | VSRDIGYPVMIK       | 30 | 3247  | 0.66 | 0.05 | 8  |
| 7 F27D9.5  | YLPEVYPEGFQGTSLSPK | 13 | 1415  | 0.67 | 0.39 | 58 |
| 10 F27D9.5 | YLPEVYPEGFQGTSLSPK | 12 | 2374  | 0.67 | 0.19 | 28 |
| 10 F27D9.5 | LARANQFLNQNK       | 32 | 1873  | 0.68 | 0.05 | 7  |
| 10 F27D9.5 | VSRDIGYPVMIK       | 36 | 4140  | 0.68 | 0.07 | 11 |
| 10 F27D9.5 | EQDVVIAFASALNARK   | 54 | 2344  | 0.68 | 0.22 | 32 |
| 22 F27D9.5 | EQDVVIAFASALNARK   | 41 | 1419  | 0.68 | 0.13 | 19 |
| 22 F27D9.5 | QEAASSFGDDRMLVEK   | 48 | 1875  | 0.69 | 0.10 | 15 |
| 10 F27D9.5 | LARANQFLNQNK       | 10 | 1845  | 0.71 | 0.11 | 16 |
| 7 F27D9.5  | RAGEITVLYK         | 29 | 2032  | 0.71 | 0.11 | 15 |
| 7 F27D9.5  | YLPEVYPEGFQGTSLSPK | 48 | 3690  | 0.72 | 0.30 | 41 |
| 7 F27D9.5  | RAGEITVLYK         | 14 | 1083  | 0.72 | 0.12 | 17 |
| 22 F27D9.5 | YLPEVYPEGFQGTSLSPK | 12 | 3013  | 0.73 | 0.20 | 28 |
| 22 F27D9.5 | EQDVVIAFASALNARK   | 48 | 1686  | 0.73 | 0.16 | 22 |
| 10 F27D9.5 | EQDVVIAFASALNARK   | 40 | 1417  | 0.73 | 0.07 | 10 |
| 7 F27D9.5  | VSRDIGYPVMIK       | 22 | 2432  | 0.73 | 0.11 | 14 |
| 1 F27D9.5  | MGEQAVQLAK         | 28 | 4460  | 0.74 | 0.15 | 20 |
| 22 F27D9.5 | YLPEVYPEGFQGTSLSPK | 17 | 3699  | 0.74 | 0.11 | 15 |
| 7 F27D9.5  | GMRVAWNDK          | 11 | 2304  | 0.75 | 0.27 | 37 |
| 7 F27D9.5  | FVSSLPVK           | 17 | 2236  | 0.75 | 0.12 | 16 |

|            |                    |    |       |      |      |    |
|------------|--------------------|----|-------|------|------|----|
| 10 F27D9.5 | YLPEVYPEGFQGTSLSPK | 10 | 1292  | 0.75 | 0.13 | 17 |
| 10 F27D9.5 | VSRDIGYPVMIK       | 28 | 2926  | 0.75 | 0.08 | 10 |
| 10 F27D9.5 | EQDVVIAFASALNARK   | 51 | 1879  | 0.76 | 0.21 | 28 |
| 1 F27D9.5  | VSRDIGYPVMIK       | 21 | 1121  | 0.76 | 0.10 | 14 |
| 10 F27D9.5 | LARANQFLNQNK       | 16 | 1681  | 0.76 | 0.16 | 22 |
| 7 F27D9.5  | LARANQFLNQNK       | 33 | 4602  | 0.76 | 0.05 | 7  |
| 7 F27D9.5  | VSRDIGYPVMIK       | 18 | 5687  | 0.76 | 0.18 | 24 |
| 1 F27D9.5  | MGEQAVQLAK         | 20 | 5766  | 0.77 | 0.14 | 18 |
| 7 F27D9.5  | VSRDIGYPVMIK       | 19 | 3209  | 0.77 | 0.20 | 26 |
| 10 F27D9.5 | RAGEITVLYK         | 18 | 3731  | 0.78 | 0.08 | 11 |
| 22 F27D9.5 | GMRVAWNDK          | 14 | 4559  | 0.78 | 0.18 | 23 |
| 10 F27D9.5 | MGEQAVQLAK         | 19 | 6691  | 0.79 | 0.23 | 29 |
| 22 F27D9.5 | YLPEVYPEGFQGTSLSPK | 50 | 3118  | 0.79 | 0.08 | 11 |
| 22 F27D9.5 | LARANQFLNQNK       | 20 | 1674  | 0.80 | 0.10 | 12 |
| 22 F27D9.5 | LARANQFLNQNK       | 19 | 2637  | 0.80 | 0.10 | 13 |
| 10 F27D9.5 | RAGEITVLYK         | 17 | 5658  | 0.81 | 0.11 | 14 |
| 22 F27D9.5 | YLPEVYPEGFQGTSLSPK | 60 | 2492  | 0.81 | 0.12 | 14 |
| 10 F27D9.5 | EQDVVIAFASALNARK   | 23 | 1715  | 0.82 | 0.22 | 27 |
| 1 F27D9.5  | EQDVVIAFASALNARK   | 28 | 1278  | 0.82 | 0.18 | 22 |
| 7 F27D9.5  | VSRDIGYPVMIK       | 24 | 1419  | 0.82 | 0.11 | 14 |
| 7 F27D9.5  | LARANQFLNQNK       | 12 | 1104  | 0.83 | 0.15 | 18 |
| 7 F27D9.5  | RAGEITVLYK         | 49 | 2594  | 0.83 | 0.09 | 10 |
| 22 F27D9.5 | VSRDIGYPVMIK       | 52 | 2796  | 0.83 | 0.09 | 11 |
| 10 F27D9.5 | GMRVAWNDK          | 12 | 6030  | 0.84 | 0.05 | 6  |
| 22 F27D9.5 | EQDVVIAFASALNARK   | 58 | 3062  | 0.84 | 0.15 | 17 |
| 22 F27D9.5 | RAGEITVLYK         | 26 | 2179  | 0.85 | 0.12 | 14 |
| 7 F27D9.5  | VDLSTVVLSPMPGAIK   | 24 | 2459  | 0.85 | 0.17 | 20 |
| 7 F27D9.5  | RAGEITVLYK         | 18 | 960   | 0.86 | 0.14 | 16 |
| 22 F27D9.5 | RAGEITVLYK         | 23 | 2072  | 0.88 | 0.15 | 17 |
| 22 F27D9.5 | GMRVAWNDK          | 10 | 4691  | 0.88 | 0.12 | 14 |
| 22 F27D9.5 | GMRVAWNDK          | 14 | 1895  | 0.88 | 0.10 | 11 |
| 1 F27D9.5  | VSRDIGYPVMIK       | 25 | 2600  | 0.89 | 0.07 | 7  |
| 1 F27D9.5  | VSRDIGYPVMIK       | 12 | 7955  | 0.91 | 0.19 | 20 |
| 7 F27D9.5  | MGEQAVQLAK         | 13 | 3550  | 0.91 | 0.29 | 31 |
| 7 F27D9.5  | MGEQAVQLAK         | 40 | 7967  | 0.92 | 0.08 | 9  |
| 22 F27D9.5 | RAGEITVLYK         | 27 | 1463  | 0.93 | 0.10 | 10 |
| 1 F27D9.5  | VSRDIGYPVMIK       | 21 | 1664  | 0.94 | 0.11 | 12 |
| 7 F27D9.5  | RAGEITVLYK         | 38 | 7916  | 0.95 | 0.18 | 19 |
| 1 F27D9.5  | TVAVHSDVDSNSLHVK   | 15 | 1881  | 0.97 | 0.14 | 15 |
| 22 F27D9.5 | RAGEITVLYK         | 38 | 1652  | 0.98 | 0.11 | 11 |
| 1 F27D9.5  | RAGEITVLYK         | 19 | 1792  | 0.99 | 0.14 | 14 |
| 10 F27D9.5 | EQDVVIAFASALNARK   | 71 | 2911  | 0.99 | 0.14 | 14 |
| 7 F27D9.5  | MGEQAVQLAK         | 30 | 4995  | 0.99 | 0.22 | 22 |
| 22 F27D9.5 | EQDVVIAFASALNARK   | 19 | 1221  | 1.00 | 0.14 | 14 |
| 22 F27D9.5 | FVSSLPVK           | 22 | 973   | 1.02 | 0.22 | 22 |
| 7 F27D9.5  | MGEQAVQLAK         | 32 | 9543  | 1.02 | 0.10 | 10 |
| 10 F27D9.5 | RAGEITVLYK         | 13 | 4618  | 1.02 | 0.11 | 11 |
| 22 F27D9.5 | VDLSTVVLSPMPGAIK   | 43 | 2033  | 1.03 | 0.08 | 8  |
| 22 F27D9.5 | VSRDIGYPVMIK       | 17 | 968   | 1.03 | 0.18 | 18 |
| 7 F27D9.5  | VSRDIGYPVMIK       | 18 | 4064  | 1.05 | 0.15 | 14 |
| 10 F27D9.5 | RAGEITVLYK         | 11 | 4361  | 1.05 | 0.11 | 10 |
| 22 F27D9.5 | GMRVAWNDK          | 11 | 3140  | 1.06 | 0.25 | 24 |
| 22 F27D9.5 | FVSSLPVK           | 17 | 514   | 1.07 | 0.11 | 10 |
| 7 F27D9.5  | LARANQFLNQNK       | 36 | 1063  | 1.07 | 0.22 | 20 |
| 1 F27D9.5  | FVSSLPVK           | 18 | 776   | 1.08 | 0.25 | 24 |
| 1 F27D9.5  | RAGEITVLYK         | 15 | 783   | 1.09 | 0.10 | 9  |
| 10 F27D9.5 | RAGEITVLYK         | 36 | 4679  | 1.10 | 0.11 | 10 |
| 22 F27D9.5 | GMRVAWNDK          | 12 | 2396  | 1.11 | 0.19 | 17 |
| 10 F27D9.5 | VSRDIGYPVMIK       | 12 | 6799  | 1.12 | 0.11 | 9  |
| 22 F27D9.5 | LARANQFLNQNK       | 35 | 2565  | 1.12 | 0.10 | 9  |
| 10 F27D9.5 | VSRDIGYPVMIK       | 24 | 4993  | 1.13 | 0.12 | 11 |
| 1 F27D9.5  | VSRDIGYPVMIK       | 14 | 1281  | 1.13 | 0.15 | 13 |
| 7 F27D9.5  | RAGEITVLYK         | 46 | 9811  | 1.14 | 0.21 | 18 |
| 10 F27D9.5 | RAGEITVLYK         | 18 | 2669  | 1.15 | 0.11 | 10 |
| 1 F27D9.5  | RAGEITVLYK         | 34 | 2329  | 1.15 | 0.10 | 9  |
| 10 F27D9.5 | LARANQFLNQNK       | 12 | 1100  | 1.15 | 0.06 | 5  |
| 22 F27D9.5 | RAGEITVLYK         | 16 | 2863  | 1.16 | 0.12 | 11 |
| 10 F27D9.5 | RAGEITVLYK         | 10 | 2657  | 1.16 | 0.09 | 8  |
| 10 F27D9.5 | VSRDIGYPVMIK       | 16 | 12703 | 1.16 | 0.08 | 7  |
| 1 F27D9.5  | RAGEITVLYK         | 26 | 1763  | 1.17 | 0.10 | 8  |
| 7 F27D9.5  | YLQYMK             | 11 | 2294  | 1.17 | 0.23 | 19 |
| 22 F27D9.5 | LARANQFLNQNK       | 17 | 2345  | 1.18 | 0.16 | 14 |
| 22 F27D9.5 | MGEQAVQLAK         | 36 | 10552 | 1.19 | 0.09 | 7  |
| 22 F27D9.5 | MGEQAVQLAK         | 38 | 8150  | 1.19 | 0.03 | 2  |
| 22 F27D9.5 | LARANQFLNQNK       | 31 | 2464  | 1.20 | 0.14 | 12 |
| 22 F27D9.5 | QEAASSFGDDRMLVEK   | 26 | 4202  | 1.20 | 0.21 | 18 |
| 7 F27D9.5  | RAGEITVLYK         | 29 | 1794  | 1.22 | 0.10 | 8  |
| 1 F27D9.5  | VSRDIGYPVMIK       | 15 | 6533  | 1.23 | 0.70 | 57 |
| 22 F27D9.5 | VSRDIGYPVMIK       | 14 | 2785  | 1.23 | 0.14 | 11 |
| 7 F27D9.5  | LARANQFLNQNK       | 51 | 4226  | 1.24 | 0.09 | 7  |
| 1 F27D9.5  | RAGEITVLYK         | 38 | 1759  | 1.24 | 0.12 | 10 |
| 10 F27D9.5 | RAGEITVLYK         | 37 | 4569  | 1.24 | 0.15 | 12 |
| 1 F27D9.5  | FVSSLPVK           | 14 | 419   | 1.24 | 0.23 | 18 |
| 7 F27D9.5  | RFRTGDITTK         | 16 | 5773  | 1.25 | 0.12 | 10 |
| 1 F27D9.5  | RFRTGDITTK         | 18 | 7383  | 1.27 | 0.13 | 10 |
| 7 F27D9.5  | RFRTGDITTK         | 15 | 2755  | 1.29 | 0.11 | 9  |
| 1 F27D9.5  | VSRDIGYPVMIK       | 29 | 2194  | 1.33 | 0.21 | 16 |
| 10 F27D9.5 | RAGEITVLYK         | 31 | 3329  | 1.35 | 0.08 | 6  |
| 7 F27D9.5  | VSRDIGYPVMIK       | 16 | 2417  | 1.38 | 0.13 | 9  |
| 22 F27D9.5 | QEAASSFGDDRMLVEK   | 27 | 6556  | 1.39 | 0.17 | 13 |
| 22 F27D9.5 | RAGEITVLYK         | 21 | 5203  | 1.39 | 0.08 | 5  |
| 10 F27D9.5 | VSRDIGYPVMIK       | 30 | 7606  | 1.40 | 0.17 | 12 |
| 22 F27D9.5 | RAGEITVLYK         | 20 | 3122  | 1.41 | 0.14 | 10 |
| 7 F27D9.5  | RAGEITVLYK         | 53 | 3089  | 1.41 | 0.06 | 4  |
| 7 F27D9.5  | RAGEITVLYK         | 24 | 1861  | 1.46 | 0.07 | 5  |
| 22 F27D9.5 | RAGEITVLYK         | 23 | 6930  | 1.47 | 0.05 | 3  |
| 7 F27D9.5  | YLPEVYPEGFQGTSLSPK | 15 | 2205  | 1.48 | 0.22 | 15 |
| 1 F27D9.5  | QAREGYRLSK         | 11 | 6458  | 1.48 | 0.08 | 5  |
| 10 F27D9.5 | RAGEITVLYK         | 43 | 3786  | 1.48 | 0.12 | 8  |
| 22 F27D9.5 | TVAVHSDVDSNSLHVK   | 41 | 7851  | 1.49 | 0.08 | 5  |
| 22 F27D9.5 | EQDVVIAFASALNARK   | 51 | 1780  | 1.50 | 0.14 | 9  |

|             |                         |    |       |      |      |    |
|-------------|-------------------------|----|-------|------|------|----|
| 22 F27D9.5  | RFRTGDITTK              | 17 | 89241 | 1.50 | 0.24 | 16 |
| 7 F27D9.5   | RAGEITVLYK              | 23 | 1522  | 1.50 | 0.10 | 7  |
| 22 F27D9.5  | RFRTGDITTK              | 22 | 88187 | 1.50 | 0.23 | 15 |
| 7 F27D9.5   | GMRVAWNDK               | 10 | 3089  | 1.51 | 0.16 | 10 |
| 1 F27D9.5   | QRSTHVASFSK             | 16 | 5232  | 1.51 | 0.12 | 8  |
| 7 F27D9.5   | RAGEITVLYK              | 49 | 4878  | 1.53 | 0.15 | 10 |
| 22 F27D9.5  | LARANQFLNQNK            | 42 | 2560  | 1.53 | 0.11 | 7  |
| 22 F27D9.5  | VSRDIGYPVMIK            | 26 | 11545 | 1.57 | 0.20 | 12 |
| 1 F27D9.5   | FVSSLPVK                | 20 | 853   | 1.57 | 0.11 | 7  |
| 10 F27D9.5  | VSRDIGYPVMIK            | 10 | 3723  | 1.58 | 0.14 | 9  |
| 7 F27D9.5   | QRSTHVASFSK             | 11 | 5400  | 1.59 | 0.25 | 16 |
| 22 F27D9.5  | RAGEITVLYK              | 12 | 1670  | 1.59 | 0.07 | 5  |
| 10 F27D9.5  | RFRTGDITTK              | 18 | 4096  | 1.64 | 0.09 | 6  |
| 1 F27D9.5   | RFRTGDITTK              | 17 | 10750 | 1.65 | 0.14 | 8  |
| 10 F27D9.5  | VSRDIGYPVMIK            | 11 | 3777  | 1.65 | 0.23 | 14 |
| 10 F27D9.5  | FVSSLPVK                | 11 | 397   | 1.68 | 0.19 | 11 |
| 10 F27D9.5  | VSRDIGYPVMIK            | 13 | 4313  | 1.68 | 0.16 | 9  |
| 22 F27D9.5  | QRSTHVASFSK             | 16 | 11745 | 1.70 | 0.13 | 8  |
| 1 F27D9.5   | RFRTGDITTK              | 18 | 8854  | 1.74 | 0.14 | 8  |
| 22 F27D9.5  | FVSSLPVK                | 16 | 645   | 1.75 | 0.08 | 5  |
| 22 F27D9.5  | TVAVHSDVDSNSLHVK        | 33 | 5705  | 1.78 | 0.19 | 10 |
| 1 F27D9.5   | QRSTHVASFSK             | 11 | 5529  | 1.79 | 0.10 | 6  |
| 7 F27D9.5   | QRSTHVASFSK             | 12 | 2097  | 1.79 | 0.13 | 7  |
| 22 F27D9.5  | LARANQFLNQNK            | 21 | 2004  | 1.80 | 0.14 | 8  |
| 10 F27D9.5  | GMRVAWNDK               | 10 | 5010  | 1.80 | 0.27 | 15 |
| 22 F27D9.5  | RFRTGDITTK              | 12 | 4625  | 1.81 | 0.08 | 5  |
| 7 F27D9.5   | FVSSLPVK                | 32 | 759   | 1.83 | 0.09 | 5  |
| 1 F27D9.5   | LARANQFLNQNK            | 37 | 1324  | 1.84 | 0.08 | 5  |
| 22 F27D9.5  | RFRTGDITTK              | 13 | 6177  | 1.85 | 0.13 | 7  |
| 1 F27D9.5   | RAGEITVLYK              | 32 | 743   | 1.86 | 0.11 | 6  |
| 1 F27D9.5   | RAGEITVLYK              | 41 | 3712  | 1.86 | 0.08 | 4  |
| 1 F27D9.5   | RAGEITVLYK              | 31 | 3339  | 1.87 | 0.14 | 7  |
| 1 F27D9.5   | QRSTHVASFSK             | 13 | 3610  | 1.87 | 0.27 | 14 |
| 1 F27D9.5   | YLQYMK                  | 16 | 2145  | 1.91 | 0.10 | 5  |
| 10 F27D9.5  | RAGEITVLYK              | 24 | 4658  | 1.91 | 0.10 | 5  |
| 1 F27D9.5   | LARANQFLNQNK            | 38 | 1287  | 1.91 | 0.13 | 7  |
| 10 F27D9.5  | RAGEITVLYK              | 13 | 5245  | 1.92 | 0.12 | 6  |
| 22 F27D9.5  | RAGEITVLYK              | 25 | 4489  | 2.09 | 0.09 | 4  |
| 10 F27D9.5  | QRSTHVASFSK             | 11 | 5913  | 2.10 | 0.13 | 6  |
| 10 F27D9.5  | RFRTGDITTK              | 15 | 8089  | 2.16 | 0.27 | 13 |
| 1 F27D9.5   | VSRDIGYPVMIK            | 17 | 3211  | 2.20 | 0.08 | 3  |
| 22 F27D9.5  | RAGEITVLYK              | 21 | 2794  | 2.22 | 0.06 | 3  |
| 22 F27D9.5  | QRSTHVASFSK             | 14 | 3974  | 2.23 | 0.15 | 7  |
| 1 F27D9.5   | GMRVAWNDK               | 19 | 4790  | 2.23 | 0.03 | 1  |
| 22 F27D9.5  | QRSTHVASFSK             | 13 | 5727  | 2.25 | 0.24 | 11 |
| 1 F27D9.5   | QRSTHVASFSK             | 12 | 3456  | 2.36 | 0.18 | 8  |
| 7 F27D9.5   | AQVRIGGK                | 11 | 1697  | 2.40 | 0.16 | 7  |
| 10 F27D9.5  | QRSTHVASFSK             | 20 | 31711 | 2.44 | 0.21 | 8  |
| 1 F27D9.5   | QRSTHVASFSK             | 12 | 18439 | 2.51 | 0.35 | 14 |
| 10 F27D9.5  | QRSTHVASFSK             | 11 | 12504 | 2.53 | 0.06 | 3  |
| 10 F27D9.5  | RAGEITVLYK              | 42 | 2931  | 2.57 | 0.10 | 4  |
| 1 F27D9.5   | QRSTHVASFSK             | 11 | 4395  | 2.68 | 0.21 | 8  |
| 10 F27D9.5  | RAGEITVLYK              | 19 | 2964  | 2.76 | 0.07 | 3  |
| 10 F27D9.5  | QRSTHVASFSK             | 12 | 23500 | 2.78 | 0.06 | 2  |
| 1 F27D9.5   | QRSTHVASFSK             | 10 | 3838  | 2.78 | 0.18 | 7  |
| 22 F27D9.5  | QRSTHVASFSK             | 14 | 32413 | 2.86 | 0.32 | 11 |
| 10 F27D9.5  | TVAVHSDVDSNSLHVK        | 42 | 7148  | 3.01 | 0.10 | 3  |
| 10 F27D9.5  | TVAVHSDVDSNSLHVK        | 57 | 7684  | 3.40 | 0.25 | 7  |
| 10 F28A10.6 | QGELPMDVLRK             | 25 | 2210  | 1.57 | 0.13 | 8  |
| 10 F28A10.6 | SLADFQYNQFK             | 17 | 2402  | 1.80 | 0.13 | 7  |
| 22 F28A12.4 | YASGDAYGTLGIDTVK        | 76 | 5436  | 0.68 | 0.11 | 17 |
| 22 F28A12.4 | YASGDAYGTLGIDTVK        | 47 | 2009  | 0.91 | 0.13 | 14 |
| 22 F28A12.4 | ASSTYIATNRPWQIK         | 36 | 1715  | 0.96 | 0.13 | 13 |
| 10 F28H1.3  | YAYTFTGEGSDAVYK         | 56 | 1797  | 0.55 | 0.18 | 32 |
| 10 F28H1.3  | YAYTFTGEGSDAVYK         | 55 | 1980  | 0.59 | 0.13 | 23 |
| 10 F28H1.3  | LDAAVELAQK              | 13 | 607   | 0.73 | 0.14 | 20 |
| 10 F28H1.3  | GLSVDNTAFEEARRK         | 13 | 15372 | 0.82 | 0.15 | 19 |
| 10 F28H1.3  | YAYTFTGEGSDAVYK         | 29 | 631   | 1.00 | 0.27 | 27 |
| 10 F28H1.3  | YAYTFTGEGSDAVYK         | 38 | 685   | 1.09 | 0.19 | 17 |
| 1 F28H1.3   | ELAAVAEQPTVLVHVFAANANSK | 22 | 943   | 1.32 | 0.23 | 17 |
| 10 F28H1.3  | GLSVDNTAFEEARRK         | 12 | 6485  | 1.34 | 0.27 | 20 |
| 10 F28H1.3  | GLSVDNTAFEEARRK         | 10 | 8450  | 1.46 | 0.26 | 18 |
| 10 F28H1.3  | GLSVDNTAFEEARRK         | 20 | 13635 | 1.62 | 0.28 | 17 |
| 10 F28H1.3  | GLSVDNTAFEEARRK         | 11 | 8539  | 1.81 | 0.54 | 30 |
| 22 F28H1.3  | GLSVDNTAFEEARRK         | 15 | 8498  | 2.09 | 0.61 | 29 |
| 1 F28H7.3   | YFGDAFTK                | 13 | 876   | 0.54 | 0.26 | 48 |
| 10 F28H7.3  | YFGDAFTK                | 20 | 2351  | 0.65 | 0.15 | 22 |
| 10 F28H7.3  | YFGDAFTK                | 18 | 2991  | 0.71 | 0.10 | 14 |
| 22 F28H7.3  | LVTYGEPRGTGNK           | 26 | 4152  | 0.96 | 0.11 | 11 |
| 22 F28H7.3  | YFGDAFTK                | 36 | 3425  | 0.96 | 0.16 | 16 |
| 22 F28H7.3  | YFGDAFTK                | 32 | 3156  | 1.00 | 0.22 | 22 |
| 22 F29C12.4 | ANWLLLEPIMK             | 18 | 1177  | 0.52 | 0.13 | 26 |
| 10 F29C12.4 | ANWLLLEPIMK             | 13 | 1276  | 0.56 | 0.17 | 30 |
| 10 F29C12.4 | LNHNAALIHLPIGK          | 34 | 15761 | 0.60 | 0.20 | 33 |
| 1 F29C12.4  | GLDAIVAEGPLIK           | 43 | 851   | 0.62 | 0.11 | 18 |
| 22 F29C12.4 | LNHNAALIHLPIGK          | 45 | 15364 | 0.71 | 0.17 | 24 |
| 10 F29C12.4 | GLDAIVAEGPLIK           | 12 | 729   | 0.73 | 0.17 | 23 |
| 22 F29C12.4 | LNHNAALIHLPIGK          | 35 | 15619 | 0.79 | 0.28 | 35 |
| 7 F29C12.4  | RAFVPVLSGSALK           | 12 | 1244  | 0.83 | 0.21 | 26 |
| 10 F29C12.4 | GVQTMINSVVK             | 38 | 1227  | 0.87 | 0.14 | 16 |
| 10 F29C12.4 | ANWLLLEPIMK             | 21 | 1443  | 0.87 | 0.11 | 13 |
| 22 F29C12.4 | ANWLLLEPIMK             | 18 | 1594  | 0.90 | 0.16 | 18 |
| 22 F29C12.4 | GVQTMINSVVK             | 52 | 1640  | 0.95 | 0.13 | 14 |
| 22 F29C12.4 | GVQTMINSVVK             | 42 | 1986  | 0.97 | 0.06 | 6  |
| 10 F29C12.4 | GVQTMINSVVK             | 57 | 1841  | 0.98 | 0.16 | 16 |
| 7 F29C12.4  | RAFVPVLSGSALK           | 32 | 1280  | 0.98 | 0.10 | 10 |
| 1 F29C12.4  | GLDAIVAEGPLIK           | 25 | 722   | 1.07 | 0.11 | 10 |
| 10 F29C12.4 | RAFVPVLSGSALK           | 27 | 2327  | 1.10 | 0.17 | 15 |
| 22 F29C12.4 | GVQTMINSVVK             | 55 | 1881  | 1.11 | 0.26 | 24 |
| 10 F29C12.4 | GLDAIVAEGPLIK           | 24 | 1125  | 1.12 | 0.09 | 8  |
| 22 F29C12.4 | GLDAIVAEGPLIK           | 43 | 1276  | 1.13 | 0.10 | 9  |

|                   |                        |    |       |      |      |     |
|-------------------|------------------------|----|-------|------|------|-----|
| 22 F29C12.4       | GLDAIVAEGPLIK          | 32 | 1545  | 1.14 | 0.07 | 6   |
| 10 F29C12.4       | RAFVPVLSGSALK          | 18 | 1719  | 1.17 | 0.13 | 11  |
| 22 F29C12.4       | RAFVPVLSGSALK          | 37 | 2548  | 1.18 | 0.13 | 11  |
| 22 F29C12.4       | GLDAIVAEGPLIK          | 50 | 2413  | 1.20 | 0.10 | 8   |
| 1 F29C12.4        | RAFVPVLSGSALK          | 25 | 1215  | 1.24 | 0.13 | 10  |
| 22 F29C12.4       | NLFPALK                | 22 | 1123  | 1.26 | 0.09 | 7   |
| 7 F29C12.4        | GLDAIVAEGPLIK          | 44 | 1678  | 1.34 | 0.13 | 10  |
| 10 F29C12.4       | GLDAIVAEGPLIK          | 34 | 1936  | 1.36 | 0.11 | 8   |
| 7 F29C12.4        | GLDAIVAEGPLIK          | 37 | 1332  | 1.36 | 0.09 | 7   |
| 1 F29C12.4        | RAFVPVLSGSALK          | 52 | 1278  | 1.38 | 0.15 | 11  |
| 10 F29C12.4       | GLDAIVAEGPLIK          | 25 | 1247  | 1.39 | 0.12 | 8   |
| 10 F29C12.4       | GLDAIVAEGPLIK          | 32 | 1753  | 1.41 | 0.05 | 4   |
| 1 F29C12.4        | GLDAIVAEGPLIK          | 19 | 1047  | 1.47 | 0.15 | 10  |
| 22 F29C12.4       | RAFVPVLSGSALK          | 29 | 2080  | 1.48 | 0.14 | 9   |
| 7 F29C12.4        | RAFVPVLSGSALK          | 46 | 1071  | 1.66 | 0.15 | 9   |
| 1 F29C12.4        | GLDAIVAEGPLIK          | 53 | 1440  | 1.76 | 0.12 | 7   |
| 7 F29F11.1        | NTGDTRESSAIHVIK        | 39 | 4201  | 0.45 | 0.16 | 35  |
| 7 F29F11.1        | NTGDTRESSAIHVIK        | 28 | 4080  | 0.48 | 0.23 | 48  |
| 22 F29F11.1       | NTGDTRESSAIHVIK        | 47 | 10190 | 0.79 | 0.14 | 18  |
| 22 F29F11.1       | NTGDTRESSAIHVIK        | 43 | 12088 | 0.86 | 0.05 | 6   |
| 7 F29F11.1        | NTGDTRESSAIHVIK        | 39 | 4593  | 1.31 | 0.12 | 9   |
| 10 F29F11.1       | NTGDTRESSAIHVIK        | 43 | 12275 | 1.34 | 0.10 | 8   |
| 10 F29F11.1       | NTGDTRESSAIHVIK        | 43 | 6238  | 1.64 | 0.17 | 10  |
| 10 F29G9.5        | EVNLEEFITAK            | 55 | 853   | 0.67 | 0.18 | 26  |
| 10 F29G9.5        | EVNLEEFITAK            | 62 | 857   | 0.76 | 0.21 | 27  |
| 10 F31C3.1        | TPWLDGRHVVF GK         | 23 | 13032 | 3.81 | 0.19 | 5   |
| 10 F31D4.3        | RAEEVLEYEK             | 58 | 3319  | 0.24 | 0.21 | 85  |
| 10 F31D4.3        | RAEEVLEYEK             | 59 | 3109  | 0.27 | 0.31 | 115 |
| 22 F31D4.3        | ATALLTMNEVRDAMK        | 53 | 2085  | 0.28 | 0.16 | 59  |
| 7 F31D4.3         | VHYVGTLENGTK           | 22 | 3382  | 0.31 | 0.17 | 53  |
| 7 F31D4.3         | RAEEVLEYEK             | 50 | 2806  | 0.33 | 0.19 | 58  |
| 7 F31D4.3         | RAEEVLEYEK             | 63 | 2711  | 0.42 | 0.16 | 38  |
| 1 F31D4.3         | RAEEVLEYEK             | 36 | 2407  | 0.45 | 0.09 | 20  |
| 22 F31D4.3        | ATALLTMNEVRDAMK        | 15 | 760   | 0.45 | 0.20 | 45  |
| 1 F31D4.3         | RAEEVLEYEK             | 43 | 1875  | 0.49 | 0.19 | 39  |
| 7 F31D4.3         | VHYVGTLENGTK           | 32 | 3183  | 0.57 | 0.14 | 24  |
| 22 F31D4.3        | ATALLTMNEVRDAMK        | 54 | 1940  | 0.58 | 0.39 | 68  |
| 7 F31D4.3         | RAEEVLEYEK             | 42 | 1126  | 0.59 | 0.16 | 27  |
| 22 F31D4.3        | ATALLTMNEVRDAMK        | 19 | 657   | 0.67 | 0.21 | 31  |
| 22 F31D4.3        | RAEEVLEYEK             | 78 | 7179  | 0.71 | 0.14 | 20  |
| 22 F31D4.3        | RAEEVLEYEK             | 80 | 7039  | 0.74 | 0.14 | 19  |
| 22 F31D4.3        | DRGTMYLQK              | 14 | 2424  | 0.82 | 0.23 | 28  |
| 7 F31D4.3         | VHYVGTLENGTK           | 40 | 3586  | 0.82 | 0.16 | 19  |
| 22 F31D4.3        | VHYVGTLENGTK           | 27 | 6064  | 0.90 | 0.09 | 10  |
| 22 F31D4.3        | VHYVGTLENGTK           | 23 | 5612  | 1.01 | 0.04 | 4   |
| 22 F31D4.3        | GWDLGVATMTK            | 11 | 744   | 1.15 | 0.28 | 25  |
| 22 F31D4.3        | GEVAEFTIRSDYGYGDAGSPPK | 14 | 1744  | 1.24 | 0.22 | 18  |
| 22 F31D4.3        | GEVAEFTIRSDYGYGDAGSPPK | 24 | 1138  | 1.34 | 0.15 | 11  |
| 22 F31D4.3        | VHYVGTLENGTK           | 60 | 13750 | 1.67 | 0.08 | 5   |
| 22 F31D4.3        | VHYVGTLENGTK           | 56 | 11557 | 1.84 | 0.07 | 4   |
| 1 F32B5.1;W10C8.5 | IIEDYHGFSPK            | 68 | 15060 | 0.34 | 0.13 | 39  |
| 1 F32B5.1;W10C8.5 | IIEDYHGFSPK            | 81 | 16320 | 0.38 | 0.14 | 37  |
| 1 F32B5.1;W10C8.5 | QLIADHFLFK             | 58 | 3502  | 0.47 | 0.05 | 10  |
| 1 F32B5.1;W10C8.5 | QLIADHFLFK             | 57 | 2980  | 0.50 | 0.15 | 30  |
| 1 F32B5.1;W10C8.5 | YYPLDGMGK              | 11 | 2318  | 0.57 | 0.06 | 10  |
| 1 F32B5.1;W10C8.5 | EFPPLPDK               | 18 | 2785  | 0.61 | 0.10 | 16  |
| 1 F32B5.1;W10C8.5 | QLIADHFLFK             | 15 | 1298  | 0.61 | 0.10 | 16  |
| 1 F32B5.1;W10C8.5 | YYPLDGMGK              | 14 | 2581  | 0.62 | 0.15 | 25  |
| 1 F32B5.1;W10C8.5 | IIEDYHGFSPK            | 24 | 1547  | 0.68 | 0.15 | 22  |
| 1 F32B5.1;W10C8.5 | EFPPLPDK               | 10 | 3030  | 0.70 | 0.14 | 20  |
| 1 F32B5.1;W10C8.5 | ARLGLSEYQAVK           | 70 | 21619 | 0.71 | 0.11 | 16  |
| 1 F32B5.1;W10C8.5 | ARLGLSEYQAVK           | 66 | 21595 | 0.75 | 0.16 | 22  |
| 1 F32B5.1;W10C8.5 | QLIADHFLFK             | 11 | 1384  | 0.82 | 0.17 | 21  |
| 1 F32B5.1;W10C8.5 | IIEDYHGFSPK            | 13 | 883   | 0.83 | 0.10 | 12  |
| 1 F32B5.1;W10C8.5 | QLIADHFLFK             | 37 | 809   | 0.90 | 0.12 | 13  |
| 1 F32B5.1;W10C8.5 | QLIADHFLFK             | 18 | 567   | 0.90 | 0.06 | 7   |
| 1 F32B5.1;W10C8.5 | QLIADHFLFK             | 18 | 728   | 0.91 | 0.13 | 15  |
| 1 F32B5.1;W10C8.5 | ARLGLSEYQAVK           | 12 | 2574  | 0.96 | 0.16 | 17  |
| 1 F32B5.1;W10C8.5 | QLIADHFLFK             | 10 | 555   | 0.97 | 0.15 | 15  |
| 1 F32B5.1;W10C8.5 | QLIADHFLFK             | 19 | 862   | 1.02 | 0.14 | 14  |
| 1 F32B5.1;W10C8.5 | YYPLDGMGK              | 22 | 3943  | 1.11 | 0.07 | 6   |
| 1 F32B5.1;W10C8.5 | ARLGLSEYQAVK           | 24 | 2675  | 1.13 | 0.07 | 6   |
| 1 F32B5.1;W10C8.5 | QLIADHFLFK             | 30 | 977   | 1.16 | 0.15 | 13  |
| 1 F32B5.1;W10C8.5 | QLIADHFLFK             | 54 | 2043  | 1.18 | 0.12 | 10  |
| 1 F32B5.1;W10C8.5 | QLIADHFLFK             | 23 | 938   | 1.23 | 0.19 | 15  |
| 1 F32B5.1;W10C8.5 | QLIADHFLFK             | 44 | 1078  | 1.32 | 0.15 | 11  |
| 1 F32B5.1;W10C8.5 | QLIADHFLFK             | 50 | 2123  | 1.32 | 0.10 | 7   |
| 1 F32B5.1;W10C8.5 | QLIADHFLFK             | 37 | 1377  | 1.40 | 0.08 | 6   |
| 1 F32B5.1;W10C8.5 | IIEDYHGFSPK            | 69 | 4800  | 1.43 | 0.09 | 6   |
| 1 F32B5.1;W10C8.5 | IIEDYHGFSPK            | 62 | 3767  | 1.55 | 0.09 | 6   |
| 1 F32B5.1;W10C8.5 | ARLGLSEYQAVK           | 38 | 4027  | 2.11 | 0.19 | 9   |
| 1 F32B5.1;W10C8.5 | GRGIFHNNDK             | 12 | 8365  | 2.38 | 0.07 | 3   |
| 1 F32B5.1;W10C8.5 | ARLGLSEYQAVK           | 29 | 6360  | 2.45 | 0.16 | 7   |
| 22 F32B5.8        | AFETYAGGIYK            | 40 | 2018  | 0.44 | 0.14 | 32  |
| 22 F32B5.8        | VSEYGTVHGYEK           | 39 | 2672  | 0.61 | 0.15 | 25  |
| 10 F32B5.8        | VSEYGTVHGYEK           | 40 | 6932  | 0.67 | 0.12 | 18  |
| 22 F32B5.8        | VSEYGTVHGYEK           | 43 | 3108  | 0.70 | 0.15 | 22  |
| 1 F32B5.8         | AFETYAGGIYK            | 28 | 1487  | 0.72 | 0.17 | 23  |
| 1 F32B5.8         | AFETYAGGIYK            | 20 | 1813  | 0.75 | 0.16 | 22  |
| 7 F32B5.8         | VSEYGTVHGYEK           | 76 | 4248  | 0.77 | 0.22 | 28  |
| 1 F32B5.8         | VSEYGTVHGYEK           | 56 | 8691  | 0.81 | 0.13 | 16  |
| 10 F32B5.8        | VSEYGTVHGYEK           | 78 | 14060 | 0.90 | 0.13 | 14  |
| 10 F32B5.8        | VSEYGTVHGYEK           | 75 | 11913 | 1.14 | 0.15 | 13  |
| 22 F32B5.8        | AFETYAGGIYK            | 15 | 699   | 1.16 | 0.29 | 25  |
| 22 F32B5.8        | VSEYGTVHGYEK           | 77 | 10213 | 1.37 | 0.23 | 17  |
| 22 F32B5.8        | VSEYGTVHGYEK           | 66 | 8360  | 1.43 | 0.10 | 7   |
| 10 F32B6.2        | VVVWQGDRAVAAAK         | 31 | 1644  | 0.61 | 0.20 | 32  |
| 22 F32B6.2        | VVVWQGDRAVAAAK         | 41 | 1487  | 0.87 | 0.25 | 28  |
| 10 F32B6.2        | VVVWQGDRAVAAAK         | 38 | 2389  | 0.96 | 0.20 | 21  |
| 22 F32B6.2        | VVVWQGDRAVAAAK         | 41 | 1665  | 1.02 | 0.16 | 16  |
| 22 F32B6.2        | VVVWQGDRAVAAAK         | 42 | 2299  | 1.21 | 0.08 | 6   |

|            |                     |    |       |      |      |    |
|------------|---------------------|----|-------|------|------|----|
| 22 F32B6.2 | VVVWGGQDRAVAAAK     | 41 | 2111  | 1.22 | 0.22 | 18 |
| 10 F32B6.2 | VVVWGGQDRAVAAAK     | 54 | 2599  | 1.27 | 0.16 | 13 |
| 10 F32B6.2 | VVVWGGQDRAVAAAK     | 37 | 2530  | 1.34 | 0.13 | 10 |
| 7 F32B6.2  | VVVWGGQDRAVAAAK     | 17 | 883   | 1.51 | 0.31 | 21 |
| 1 F32D1.5  | IFTTIHK             | 22 | 526   | 0.51 | 0.16 | 31 |
| 22 F32D1.5 | IFTTIHK             | 36 | 8650  | 0.94 | 0.06 | 6  |
| 22 F32D1.5 | IFTTIHK             | 24 | 12393 | 1.06 | 0.06 | 6  |
| 7 F32D1.5  | IFTTIHK             | 41 | 6758  | 1.12 | 0.08 | 7  |
| 1 F32D1.5  | IFTTIHK             | 30 | 7732  | 1.16 | 0.05 | 4  |
| 1 F32D1.5  | IFTTIHK             | 23 | 9938  | 1.16 | 0.07 | 6  |
| 7 F32D1.5  | HYSVDEWK            | 17 | 4521  | 1.32 | 0.14 | 11 |
| 1 F32D1.5  | IFTTIHK             | 31 | 3353  | 1.40 | 0.08 | 6  |
| 22 F32D1.5 | HYSVDEWK            | 18 | 1769  | 1.42 | 0.23 | 16 |
| 10 F32D1.5 | HYSVDEWK            | 18 | 5607  | 1.72 | 0.05 | 3  |
| 10 F32D1.5 | HYSVDEWK            | 18 | 6712  | 1.76 | 0.13 | 7  |
| 22 F32D1.5 | HYSVDEWK            | 12 | 5152  | 1.89 | 0.10 | 5  |
| 10 F32D1.5 | HYSVDEWK            | 18 | 4055  | 2.01 | 0.09 | 4  |
| 10 F32D1.5 | IFTTIHK             | 23 | 8465  | 2.32 | 0.13 | 5  |
| 10 F32D1.5 | IFTTIHK             | 14 | 2560  | 2.61 | 0.10 | 4  |
| 10 F32D1.5 | HYSVDEWK            | 13 | 2766  | 2.96 | 0.14 | 5  |
| 1 F32D1.5  | HYSVDEWK            | 20 | 4997  | 2.96 | 0.18 | 6  |
| 1 F32D1.5  | HYSVDEWK            | 19 | 4199  | 3.45 | 0.15 | 4  |
| 7 F32H2.5  | AADHIAPPITPHPFTK    | 14 | 3175  | 0.28 | 0.13 | 47 |
| 22 F32H2.5 | QALERDHDIVLSMK      | 20 | 2227  | 0.36 | 0.16 | 45 |
| 22 F32H2.5 | AQRLYATVVHAK        | 25 | 600   | 0.42 | 0.12 | 29 |
| 22 F32H2.5 | QALERDHDIVLSMK      | 12 | 1865  | 0.50 | 0.20 | 40 |
| 10 F32H2.5 | EIARLLEQGIK         | 20 | 805   | 0.54 | 0.19 | 35 |
| 10 F32H2.5 | EIARLLEQGIK         | 16 | 1727  | 0.56 | 0.17 | 29 |
| 1 F32H2.5  | NLDYVLLDK           | 16 | 386   | 0.59 | 0.22 | 37 |
| 22 F32H2.5 | EIARLLEQGIK         | 22 | 1629  | 0.61 | 0.11 | 18 |
| 22 F32H2.5 | AADHIAPPITPHPFTK    | 20 | 5492  | 0.64 | 0.23 | 37 |
| 10 F32H2.5 | EIARLLEQGIK         | 20 | 1342  | 0.64 | 0.19 | 29 |
| 10 F32H2.5 | EFNWIEPLQK          | 13 | 996   | 0.65 | 0.20 | 30 |
| 10 F32H2.5 | EIARLLEQGIK         | 17 | 873   | 0.67 | 0.27 | 40 |
| 22 F32H2.5 | AADHIAPPITPHPFTK    | 27 | 6318  | 0.70 | 0.07 | 10 |
| 1 F32H2.5  | NLDYVLLDK           | 18 | 524   | 0.70 | 0.22 | 31 |
| 22 F32H2.5 | QALERDHDIVLSMK      | 12 | 2571  | 0.71 | 0.24 | 34 |
| 10 F32H2.5 | NLDYVLLDK           | 39 | 1391  | 0.76 | 0.20 | 27 |
| 22 F32H2.5 | QALERDHDIVLSMK      | 17 | 4490  | 0.76 | 0.12 | 16 |
| 10 F32H2.5 | EIARLLEQGIK         | 30 | 1525  | 0.77 | 0.07 | 10 |
| 10 F32H2.5 | HLEHVVEK            | 13 | 5171  | 0.80 | 0.10 | 13 |
| 22 F32H2.5 | EIARLLEQGIK         | 30 | 1505  | 0.80 | 0.28 | 35 |
| 1 F32H2.5  | QALERDHDIVLSMK      | 10 | 1555  | 0.83 | 0.22 | 27 |
| 10 F32H2.5 | EIARLLEQGIK         | 23 | 1100  | 0.84 | 0.16 | 19 |
| 10 F32H2.5 | NLDYVLLDK           | 35 | 2363  | 0.86 | 0.18 | 21 |
| 10 F32H2.5 | TIWLVSNK            | 28 | 896   | 0.86 | 0.18 | 21 |
| 22 F32H2.5 | NLDYVLLDK           | 12 | 986   | 0.87 | 0.12 | 13 |
| 10 F32H2.5 | NLDYVLLDK           | 13 | 1177  | 0.87 | 0.06 | 7  |
| 10 F32H2.5 | AADHIAPPITPHPFTK    | 24 | 6428  | 0.90 | 0.10 | 11 |
| 7 F32H2.5  | HLEHVVEK            | 11 | 2740  | 0.91 | 0.21 | 23 |
| 10 F32H2.5 | NLDYVLLDK           | 15 | 375   | 0.94 | 0.22 | 23 |
| 1 F32H2.5  | AADHIAPPITPHPFTK    | 11 | 1900  | 0.94 | 0.09 | 10 |
| 10 F32H2.5 | AADHIAPPITPHPFTK    | 22 | 8157  | 0.94 | 0.10 | 11 |
| 22 F32H2.5 | EIARLLEQGIK         | 28 | 1079  | 0.98 | 0.24 | 25 |
| 10 F32H2.5 | AQRLYATVVHAK        | 48 | 3378  | 0.98 | 0.11 | 11 |
| 7 F32H2.5  | QQLYTGFSSK          | 18 | 2337  | 0.99 | 0.14 | 14 |
| 22 F32H2.5 | AQRLYATVVHAK        | 21 | 4051  | 1.01 | 0.11 | 11 |
| 22 F32H2.5 | NLDYVLLDK           | 19 | 1234  | 1.01 | 0.19 | 18 |
| 10 F32H2.5 | TIWLVSNK            | 13 | 1856  | 1.02 | 0.09 | 9  |
| 7 F32H2.5  | NLDYVLLDK           | 40 | 2081  | 1.03 | 0.09 | 9  |
| 10 F32H2.5 | HLEHVVEK            | 15 | 1636  | 1.04 | 0.16 | 15 |
| 10 F32H2.5 | TIWLVSNK            | 33 | 1275  | 1.06 | 0.15 | 15 |
| 7 F32H2.5  | NLDYVLLDK           | 29 | 1939  | 1.12 | 0.14 | 12 |
| 22 F32H2.5 | EIARLLEQGIK         | 15 | 2015  | 1.13 | 0.10 | 8  |
| 22 F32H2.5 | AQRLYATVVHAK        | 11 | 1471  | 1.13 | 0.13 | 12 |
| 10 F32H2.5 | RTDSLIGSVK          | 28 | 969   | 1.13 | 0.15 | 13 |
| 10 F32H2.5 | TIWLVSNK            | 31 | 799   | 1.13 | 0.14 | 13 |
| 22 F32H2.5 | EIARLLEQGIK         | 27 | 1704  | 1.14 | 0.20 | 17 |
| 10 F32H2.5 | AQRLYATVVHAK        | 37 | 2146  | 1.20 | 0.13 | 11 |
| 10 F32H2.5 | AQRLYATVVHAK        | 18 | 1205  | 1.22 | 0.21 | 17 |
| 7 F32H2.5  | HLEHVVEK            | 17 | 3128  | 1.23 | 0.17 | 14 |
| 1 F32H2.5  | HLEHVVEK            | 14 | 2398  | 1.23 | 0.14 | 11 |
| 10 F32H2.5 | NLDYVLLDK           | 17 | 476   | 1.24 | 0.16 | 13 |
| 22 F32H2.5 | QALERDHDIVLSMK      | 11 | 3439  | 1.28 | 0.07 | 6  |
| 22 F32H2.5 | AQRLYATVVHAK        | 32 | 3478  | 1.32 | 0.13 | 10 |
| 10 F32H2.5 | QQLYTGFSSK          | 40 | 2328  | 1.34 | 0.13 | 9  |
| 22 F32H2.5 | EIARLLEQGIK         | 22 | 1264  | 1.35 | 0.38 | 28 |
| 10 F32H2.5 | AQRLYATVVHAK        | 15 | 1037  | 1.43 | 0.21 | 14 |
| 10 F32H2.5 | TIWLVSNK            | 37 | 734   | 1.50 | 0.21 | 14 |
| 10 F32H2.5 | NLDYVLLDK           | 19 | 628   | 1.52 | 0.10 | 7  |
| 10 F32H2.5 | NLDYVLLDK           | 30 | 986   | 1.60 | 0.08 | 5  |
| 10 F32H2.5 | AQRLYATVVHAK        | 21 | 2642  | 1.63 | 0.18 | 11 |
| 1 F32H2.5  | MRVDVNDLDPQDIIVK    | 19 | 1041  | 1.65 | 0.03 | 2  |
| 22 F32H2.5 | HLEHVVEK            | 17 | 7490  | 1.73 | 0.07 | 4  |
| 10 F32H2.5 | HLEHVVEK            | 19 | 2307  | 1.75 | 0.09 | 5  |
| 10 F32H2.5 | NLDYVLLDK           | 31 | 983   | 1.80 | 0.20 | 11 |
| 22 F32H2.5 | QQLYTGFSSK          | 17 | 1890  | 1.87 | 0.15 | 8  |
| 10 F32H2.5 | HLEHVVEK            | 14 | 2240  | 1.93 | 0.18 | 9  |
| 10 F32H2.5 | AQRLYATVVHAK        | 14 | 1366  | 1.94 | 0.22 | 12 |
| 22 F32H2.5 | HLEHVVEK            | 16 | 2851  | 2.05 | 0.31 | 15 |
| 22 F32H2.5 | HLEHVVEK            | 22 | 7372  | 2.06 | 0.07 | 3  |
| 10 F32H2.5 | HLEHVVEK            | 21 | 3230  | 2.09 | 0.14 | 6  |
| 10 F32H2.5 | HLEHVVEK            | 18 | 2316  | 2.44 | 0.07 | 3  |
| 22 F32H2.5 | HLEHVVEK            | 13 | 2108  | 2.71 | 0.16 | 6  |
| 22 F32H2.5 | HLEHVVEK            | 30 | 2395  | 3.11 | 0.19 | 6  |
| 1 F32H2.5  | AQRLYATVVHAK        | 14 | 724   | 3.32 | 0.38 | 11 |
| 1 F33A8.3  | GLEAASVTGPDGGPVQGSK | 19 | 1850  | 1.47 | 0.08 | 5  |
| 22 F33A8.3 | GLEAASVTGPDGGPVQGSK | 22 | 5826  | 1.52 | 0.06 | 4  |
| 22 F33A8.3 | GLEAASVTGPDGGPVQGSK | 11 | 6487  | 1.54 | 0.15 | 10 |
| 1 F33A8.3  | GLEAASVTGPDGGPVQGSK | 22 | 2945  | 1.62 | 0.15 | 9  |
| 1 F33H2.3  | MFEMIPSLK           | 17 | 886   | 0.66 | 0.12 | 18 |

|                                       |                              |    |       |      |      |     |
|---------------------------------------|------------------------------|----|-------|------|------|-----|
| 1 F33H2.3                             | MFEMIPSLK                    | 23 | 1488  | 0.92 | 0.10 | 11  |
| 1 F33H2.3                             | MFEMIPSLK                    | 22 | 1076  | 1.26 | 0.17 | 14  |
| 1 F33H2.3                             | MFEMIPSLK                    | 10 | 767   | 1.31 | 0.19 | 14  |
| 1 F33H2.3                             | MFEMIPSLK                    | 16 | 1394  | 1.34 | 0.15 | 11  |
| 1 F33H2.3                             | MFEMIPSLK                    | 11 | 932   | 2.10 | 0.23 | 11  |
| 10 F35A5.1                            | RRTIISDALPQSK                | 12 | 22967 | 3.68 | 0.66 | 18  |
| 1 F35C5.6                             | RLVVVYASAYK                  | 35 | 890   | 0.44 | 0.16 | 36  |
| 10 F35C5.6                            | RLVVVYASAYK                  | 36 | 955   | 0.50 | 0.11 | 22  |
| 7 F35C5.6                             | RLVVVYASAYK                  | 50 | 3712  | 0.62 | 0.11 | 19  |
| 10 F35C5.6                            | GEGELDPIPVADRLK              | 22 | 6960  | 0.64 | 0.16 | 25  |
| 7 F35C5.6                             | RLVVVYASAYK                  | 57 | 5104  | 0.67 | 0.18 | 27  |
| 22 F35C5.6                            | RLVVVYASAYK                  | 64 | 4159  | 0.74 | 0.11 | 14  |
| 1 F35C5.6                             | GIGAAENVLQSGRTNGVRSNYK       | 11 | 1982  | 0.74 | 0.31 | 41  |
| 22 F35C5.6                            | GEGELDPIPVADRLK              | 40 | 7762  | 0.76 | 0.08 | 10  |
| 7 F35C5.6                             | GEGELDPIPVADRLK              | 37 | 5168  | 0.85 | 0.20 | 23  |
| 7 F35C5.6                             | GIGAAENVLQSGRTNGVRSNYK       | 15 | 8132  | 0.91 | 0.08 | 9   |
| 22 F35C5.6                            | RLVVVYASAYK                  | 56 | 2872  | 0.92 | 0.10 | 11  |
| 7 F35C5.6                             | NGFLAAEYDGQK                 | 42 | 2870  | 0.92 | 0.13 | 14  |
| 7 F35C5.6                             | GIGAAENVLQSGRTNGVRSNYK       | 25 | 3480  | 0.96 | 0.09 | 10  |
| 10 F35C5.6                            | RLVVVYASAYK                  | 36 | 1802  | 0.99 | 0.08 | 8   |
| 22 F35C5.6                            | RLVVVYASAYK                  | 69 | 3288  | 1.01 | 0.15 | 15  |
| 10 F35C5.6                            | GIGAAENVLQSGRTNGVRSNYK       | 15 | 10810 | 1.01 | 0.21 | 20  |
| 10 F35C5.6                            | GEGELDPIPVADRLK              | 12 | 5566  | 1.04 | 0.18 | 17  |
| 7 F35C5.6                             | GEGELDPIPVADRLK              | 32 | 5383  | 1.06 | 0.21 | 20  |
| 7 F35C5.6                             | WNPSYPK                      | 12 | 520   | 1.10 | 0.18 | 16  |
| 7 F35C5.6                             | GIGAAENVLQSGRTNGVRSNYK       | 12 | 6220  | 1.12 | 0.12 | 11  |
| 7 F35C5.6                             | GEGELDPIPVADRLK              | 50 | 5855  | 1.12 | 0.12 | 11  |
| 7 F35C5.6                             | GEGELDPIPVADRLK              | 27 | 3375  | 1.12 | 0.16 | 14  |
| 10 F35C5.6                            | GIGAAENVLQSGRTNGVRSNYK       | 11 | 6413  | 1.17 | 0.12 | 10  |
| 22 F35C5.6                            | GEGELDPIPVADRLK              | 12 | 3751  | 1.20 | 0.08 | 7   |
| 10 F35C5.6                            | RLVVVYASAYK                  | 45 | 1815  | 1.30 | 0.13 | 10  |
| 22 F35C5.6                            | WNPSYPK                      | 13 | 689   | 2.45 | 0.18 | 7   |
| 22 F35D11.4                           | FDVPSEVLDALK                 | 14 | 1550  | 0.73 | 0.13 | 18  |
| 22 F35D11.4                           | QHDIFYESPNGRLK               | 24 | 9602  | 1.41 | 0.14 | 10  |
| 22 F35D11.4                           | QHDIFYESPNGRLK               | 17 | 6514  | 1.49 | 0.22 | 14  |
| 10 F35D11.4                           | QHDIFYESPNGRLK               | 24 | 7653  | 1.79 | 0.19 | 10  |
| 1 F35D11.4                            | QHDIFYESPNGRLK               | 12 | 6160  | 1.92 | 0.27 | 14  |
| 10 F35E8.8                            | DYYAEARPYLAVK                | 21 | 2264  | 0.67 | 0.20 | 30  |
| 22 F35G12.10                          | FLQNAIQQLK                   | 16 | 980   | 1.96 | 0.23 | 12  |
| 22 F35G12.12                          | QNAEALYELGIVK                | 39 | 1065  | 0.63 | 0.07 | 12  |
| 22 F35G12.2                           | RIHTADIGGTSK                 | 23 | 14982 | 0.84 | 0.16 | 19  |
| 22 F35G12.2                           | RIHTADIGGTSK                 | 17 | 11165 | 1.15 | 0.11 | 10  |
| 10 F35G12.2                           | RIHTADIGGTSK                 | 15 | 8018  | 2.32 | 0.21 | 9   |
| 1 F35G2.2                             | EGLAENTPIFDK                 | 34 | 1430  | 0.65 | 0.14 | 21  |
| 22 F35G2.2                            | QMEQAGAILTTSEATILGLVGGS DHPK | 43 | 2970  | 0.81 | 0.22 | 27  |
| 22 F35G2.2                            | LILTSAPDTGLVPLSK             | 16 | 1093  | 0.90 | 0.21 | 23  |
| 10 F35G2.2                            | LILTSAPDTGLVPLSK             | 38 | 1042  | 1.21 | 0.31 | 26  |
| 1 F35G2.2                             | GLGHTVPTLK                   | 32 | 27297 | 1.57 | 0.19 | 12  |
| 1 F35G2.2                             | GLGHTVPTLK                   | 53 | 5963  | 1.64 | 0.15 | 9   |
| 22 F35G2.2                            | GLGHTVPTLK                   | 66 | 12536 | 1.94 | 0.12 | 6   |
| 22 F35G2.2                            | GLGHTVPTLK                   | 59 | 15817 | 1.98 | 0.18 | 9   |
| 1 F35G2.2                             | GLGHTVPTLK                   | 28 | 4791  | 2.30 | 0.23 | 10  |
| 1 F35G2.2                             | GLGHTVPTLK                   | 21 | 3381  | 2.49 | 0.28 | 11  |
| 10 F35G2.4                            | TGELEHATYRISK                | 12 | 7915  | 0.65 | 0.29 | 44  |
| 10 F35G2.4                            | NVIHDSEIEVIK                 | 32 | 7031  | 0.71 | 0.21 | 29  |
| 10 F35G2.4                            | NVIHDSEIEVIK                 | 41 | 7123  | 0.75 | 0.14 | 19  |
| 22 F35G2.4                            | NVIHDSEIEVIK                 | 37 | 6739  | 1.67 | 0.18 | 11  |
| 22 F35G2.4                            | NVIHDSEIEVIK                 | 48 | 7174  | 1.79 | 0.16 | 9   |
| 7 F36D4.3a;F36D4.3b;F36D4.3e;F36D4.3f | EAALWRDKPK                   | 13 | 3374  | 1.54 | 0.43 | 28  |
| 22 F36H1.6                            | SIYHPSILPK                   | 45 | 3323  | 0.24 | 0.39 | 162 |
| 22 F36H1.6                            | VPGAWAVLNGEK                 | 28 | 1642  | 0.24 | 0.47 | 196 |
| 10 F36H1.6                            | FVGSSDGRTFK                  | 24 | 2020  | 0.63 | 0.14 | 22  |
| 10 F36H1.6                            | SPLIIFADADLEK                | 58 | 1125  | 0.64 | 0.17 | 26  |
| 10 F36H1.6                            | TDVAAPFGGFK                  | 13 | 1845  | 0.77 | 0.05 | 6   |
| 10 F36H1.6                            | FVGSSDGRTFK                  | 14 | 2192  | 0.79 | 0.09 | 12  |
| 10 F36H1.6                            | FVGSSDGRTFK                  | 24 | 2374  | 0.83 | 0.11 | 13  |
| 10 F36H1.6                            | FVGSSDGRTFK                  | 20 | 2635  | 0.84 | 0.07 | 8   |
| 10 F36H1.6                            | SPLIIFADADLEK                | 67 | 1128  | 0.93 | 0.15 | 17  |
| 10 F36H1.6                            | SPLIIFADADLEK                | 63 | 1088  | 1.01 | 0.12 | 12  |
| 10 F36H1.6                            | TDVAAPFGGFK                  | 10 | 1421  | 1.12 | 0.09 | 8   |
| 1 F36H1.6                             | SPLIIFADADLEK                | 63 | 933   | 1.12 | 0.11 | 10  |
| 22 F36H1.6                            | VPGAWAVLNGEK                 | 13 | 2051  | 1.18 | 0.20 | 17  |
| 22 F36H1.6                            | VPGAWAVLNGEK                 | 27 | 1914  | 1.21 | 0.14 | 12  |
| 22 F36H1.6                            | SPLIIFADADLEK                | 62 | 1413  | 1.22 | 0.16 | 13  |
| 10 F36H1.6                            | SPLIIFADADLEK                | 57 | 1116  | 1.23 | 0.18 | 15  |
| 22 F36H1.6                            | SPLIIFADADLEK                | 44 | 1082  | 1.24 | 0.12 | 9   |
| 10 F36H1.6                            | SPLIIFADADLEK                | 51 | 1007  | 1.25 | 0.24 | 19  |
| 22 F36H1.6                            | SPLIIFADADLEK                | 54 | 1501  | 1.27 | 0.14 | 11  |
| 22 F36H1.6                            | SIHDDFVK                     | 11 | 3707  | 1.32 | 0.13 | 10  |
| 10 F36H1.6                            | TDVAAPFGGFK                  | 21 | 1579  | 1.32 | 0.14 | 11  |
| 10 F36H1.6                            | VPGAWAVLNGEK                 | 12 | 1326  | 1.33 | 0.31 | 24  |
| 10 F36H1.6                            | FVGSSDGRTFK                  | 32 | 2765  | 1.45 | 0.14 | 10  |
| 22 F36H1.6                            | FVGSSDGRTFK                  | 11 | 3015  | 1.46 | 0.11 | 8   |
| 10 F36H1.6                            | FPHDQFIDGK                   | 18 | 3951  | 1.48 | 0.15 | 10  |
| 10 F36H1.6                            | TIPISNARPNK                  | 34 | 2037  | 1.55 | 0.11 | 7   |
| 10 F36H1.6                            | VPGAWAVLNGEK                 | 11 | 1725  | 1.60 | 0.35 | 22  |
| 10 F36H1.6                            | FPHDQFIDGK                   | 16 | 7457  | 1.61 | 0.28 | 18  |
| 10 F36H1.6                            | SIYHPSILPK                   | 50 | 4598  | 1.62 | 0.19 | 12  |
| 10 F36H1.6                            | SIYHPSILPK                   | 37 | 4600  | 1.81 | 0.16 | 9   |
| 10 F36H1.6                            | FVGSSDGRTFK                  | 25 | 2457  | 1.81 | 0.15 | 8   |
| 10 F36H1.6                            | VPGAWAVLNGEK                 | 13 | 1132  | 1.90 | 0.20 | 10  |
| 1 F36H1.6                             | SPLIIFADADLEK                | 46 | 625   | 1.90 | 0.12 | 7   |
| 10 F36H1.6                            | VPGAWAVLNGEK                 | 12 | 1757  | 1.95 | 0.18 | 9   |
| 22 F36H1.6                            | VPGAWAVLNGEK                 | 26 | 1937  | 3.30 | 0.58 | 17  |
| 22 F37B1.1                            | EVFAPARDTFFK                 | 14 | 1773  | 0.57 | 0.20 | 35  |
| 22 F37B1.1                            | EVFAPARDTFFK                 | 16 | 2300  | 0.70 | 0.13 | 19  |
| 10 F37B1.1                            | EVFAPARDTFFK                 | 12 | 3275  | 1.10 | 0.17 | 15  |
| 10 F37B12.2                           | VAINVPIFK                    | 21 | 1019  | 0.60 | 0.19 | 31  |
| 22 F37B12.2                           | VAINVPIFK                    | 15 | 842   | 0.93 | 0.18 | 19  |
| 7 F37C4.5a                            | VADSRVAVQK                   | 29 | 4554  | 0.44 | 0.12 | 27  |
| 7 F37C4.5a                            | VADSRVAVQK                   | 39 | 4458  | 0.49 | 0.16 | 32  |

|             |                              |    |        |      |      |    |
|-------------|------------------------------|----|--------|------|------|----|
| 10 F37C4.5a | RIEGLDNLITEVAK               | 28 | 6876   | 0.52 | 0.22 | 42 |
| 10 F37C4.5a | VADSRVAVQK                   | 45 | 10097  | 0.53 | 0.06 | 11 |
| 22 F37C4.5a | RIEGLDNLITEVAK               | 38 | 2159   | 0.54 | 0.16 | 30 |
| 10 F37C4.5a | RIEGLDNLITEVAK               | 55 | 1918   | 0.59 | 0.19 | 31 |
| 10 F37C4.5a | VADSRVAVQK                   | 34 | 5911   | 0.62 | 0.15 | 24 |
| 10 F37C4.5a | RIEGLDNLITEVAK               | 36 | 774    | 0.63 | 0.13 | 21 |
| 22 F37C4.5a | RTFQVELAHGYNEVK              | 25 | 23753  | 0.67 | 0.16 | 24 |
| 22 F37C4.5a | RTFQVELAHGYNEVK              | 35 | 32733  | 0.69 | 0.08 | 12 |
| 7 F37C4.5a  | RIEGLDNLITEVAK               | 88 | 2356   | 0.69 | 0.14 | 21 |
| 22 F37C4.5a | VADSRVAVQK                   | 50 | 29392  | 0.71 | 0.10 | 15 |
| 10 F37C4.5a | NQEGAEFVIPERVLAIK            | 20 | 3449   | 0.71 | 0.11 | 15 |
| 10 F37C4.5a | TVPLVLSTARPAHGVK             | 65 | 2997   | 0.72 | 0.24 | 33 |
| 22 F37C4.5a | RIEGLDNLITEVAK               | 31 | 1974   | 0.73 | 0.27 | 37 |
| 7 F37C4.5a  | RIEGLDNLITEVAK               | 70 | 1684   | 0.73 | 0.27 | 37 |
| 22 F37C4.5a | TVPLVLSTARPAHGVK             | 44 | 110523 | 0.73 | 0.18 | 24 |
| 10 F37C4.5a | NQEGAEFVIPERVLAIK            | 24 | 8677   | 0.74 | 0.15 | 20 |
| 7 F37C4.5a  | RIEGLDNLITEVAK               | 63 | 2706   | 0.74 | 0.09 | 13 |
| 22 F37C4.5a | RTFQVELAHGYNEVK              | 13 | 2553   | 0.75 | 0.12 | 16 |
| 10 F37C4.5a | TVPLVLSTARPAHGVK             | 67 | 3522   | 0.76 | 0.20 | 26 |
| 22 F37C4.5a | RTFQVELAHGYNEVK              | 12 | 2098   | 0.76 | 0.24 | 32 |
| 22 F37C4.5a | YTTEHPQAEQIRYEEK             | 15 | 10615  | 0.77 | 0.30 | 39 |
| 7 F37C4.5a  | NQEGAEFVIPERVLAIK            | 49 | 1152   | 0.77 | 0.16 | 21 |
| 7 F37C4.5a  | SSNIASEFSIGRPATIDDRTDEYK     | 20 | 5428   | 0.77 | 0.31 | 40 |
| 10 F37C4.5a | NQEGAEFVIPERVLAIK            | 26 | 2231   | 0.77 | 0.16 | 20 |
| 10 F37C4.5a | RIEGLDNLITEVAK               | 80 | 2760   | 0.78 | 0.12 | 16 |
| 10 F37C4.5a | VHLNTPEAVEVDEASVEPTVGAAITPEK | 61 | 7687   | 0.78 | 0.15 | 20 |
| 7 F37C4.5a  | RTFQVELAHGYNEVK              | 17 | 18753  | 0.78 | 0.14 | 18 |
| 10 F37C4.5a | VHLNTPEAVEVDEASVEPTVGAAITPEK | 63 | 4804   | 0.78 | 0.16 | 20 |
| 22 F37C4.5a | TVPLVLSTARPAHGVK             | 52 | 3970   | 0.80 | 0.16 | 20 |
| 10 F37C4.5a | NQEGAEFVIPERVLAIK            | 26 | 1176   | 0.80 | 0.13 | 16 |
| 22 F37C4.5a | VADSRVAVQK                   | 34 | 21066  | 0.81 | 0.27 | 33 |
| 10 F37C4.5a | RIEGLDNLITEVAK               | 60 | 2854   | 0.81 | 0.08 | 10 |
| 10 F37C4.5a | VADSRVAVQK                   | 53 | 6976   | 0.83 | 0.21 | 25 |
| 7 F37C4.5a  | RTFQVELAHGYNEVK              | 16 | 14844  | 0.83 | 0.15 | 18 |
| 10 F37C4.5a | VADSRVAVQK                   | 25 | 3571   | 0.84 | 0.21 | 25 |
| 22 F37C4.5a | RIEGLDNLITEVAK               | 49 | 1485   | 0.86 | 0.14 | 16 |
| 7 F37C4.5a  | RIEGLDNLITEVAK               | 85 | 3134   | 0.87 | 0.13 | 15 |
| 7 F37C4.5a  | SSNIASEFSIGRPATIDDRTDEYK     | 13 | 2794   | 0.88 | 0.13 | 15 |
| 7 F37C4.5a  | NQEGAEFVIPERVLAIK            | 55 | 6864   | 0.89 | 0.12 | 13 |
| 10 F37C4.5a | YTTEHPQAEQIRYEEK             | 16 | 20233  | 0.91 | 0.15 | 17 |
| 22 F37C4.5a | VADSRVAVQK                   | 32 | 4442   | 0.92 | 0.16 | 17 |
| 22 F37C4.5a | RIEGLDNLITEVAK               | 32 | 1318   | 0.92 | 0.25 | 28 |
| 10 F37C4.5a | NQEGAEFVIPERVLAIK            | 39 | 1339   | 0.92 | 0.14 | 15 |
| 22 F37C4.5a | NQEGAEFVIPERVLAIK            | 29 | 12328  | 0.92 | 0.10 | 11 |
| 22 F37C4.5a | VADSRVAVQK                   | 27 | 5023   | 0.93 | 0.16 | 18 |
| 22 F37C4.5a | RIEGLDNLITEVAK               | 37 | 1386   | 0.93 | 0.14 | 15 |
| 7 F37C4.5a  | NQEGAEFVIPERVLAIK            | 51 | 6561   | 0.93 | 0.13 | 14 |
| 7 F37C4.5a  | VADSRVAVQK                   | 33 | 4093   | 0.95 | 0.17 | 18 |
| 22 F37C4.5a | NQEGAEFVIPERVLAIK            | 66 | 4541   | 0.96 | 0.15 | 16 |
| 10 F37C4.5a | RIEGLDNLITEVAK               | 54 | 1448   | 0.96 | 0.12 | 12 |
| 10 F37C4.5a | NQEGAEFVIPERVLAIK            | 34 | 1263   | 0.97 | 0.16 | 16 |
| 22 F37C4.5a | VADSRVAVQK                   | 22 | 6342   | 0.98 | 0.32 | 33 |
| 22 F37C4.5a | SSNIASEFSIGRPATIDDRTDEYK     | 18 | 6773   | 0.98 | 0.18 | 18 |
| 22 F37C4.5a | NQEGAEFVIPERVLAIK            | 31 | 7015   | 0.98 | 0.06 | 6  |
| 10 F37C4.5a | VADSRVAVQK                   | 73 | 19865  | 0.98 | 0.10 | 10 |
| 7 F37C4.5a  | RIEGLDNLITEVAK               | 27 | 727    | 0.99 | 0.14 | 14 |
| 22 F37C4.5a | NQEGAEFVIPERVLAIK            | 27 | 2809   | 1.00 | 0.15 | 15 |
| 7 F37C4.5a  | RIEGLDNLITEVAK               | 23 | 4089   | 1.02 | 0.16 | 15 |
| 22 F37C4.5a | NQEGAEFVIPERVLAIK            | 29 | 3076   | 1.03 | 0.20 | 19 |
| 10 F37C4.5a | TVPLVLSTARPAHGVK             | 54 | 3765   | 1.04 | 0.16 | 15 |
| 7 F37C4.5a  | RIEGLDNLITEVAK               | 31 | 5716   | 1.06 | 0.13 | 12 |
| 7 F37C4.5a  | VADSRVAVQK                   | 17 | 3513   | 1.07 | 0.20 | 19 |
| 22 F37C4.5a | NQEGAEFVIPERVLAIK            | 60 | 5778   | 1.08 | 0.12 | 11 |
| 22 F37C4.5a | TVPLVLSTARPAHGVK             | 32 | 68025  | 1.08 | 0.21 | 19 |
| 10 F37C4.5a | RIEGLDNLITEVAK               | 62 | 1721   | 1.08 | 0.11 | 10 |
| 7 F37C4.5a  | VADSRVAVQK                   | 42 | 7531   | 1.09 | 0.17 | 16 |
| 22 F37C4.5a | RIEGLDNLITEVAK               | 44 | 1724   | 1.09 | 0.30 | 27 |
| 10 F37C4.5a | RIEGLDNLITEVAK               | 91 | 3489   | 1.11 | 0.11 | 10 |
| 10 F37C4.5a | RIEGLDNLITEVAK               | 96 | 4922   | 1.11 | 0.21 | 19 |
| 22 F37C4.5a | TVPLVLSTARPAHGVK             | 69 | 3685   | 1.12 | 0.14 | 12 |
| 22 F37C4.5a | TVPLVLSTARPAHGVK             | 67 | 4266   | 1.13 | 0.15 | 14 |
| 7 F37C4.5a  | TVPLVLSTARPAHGVK             | 13 | 16310  | 1.14 | 0.13 | 12 |
| 10 F37C4.5a | SSNIASEFSIGRPATIDDRTDEYK     | 12 | 9718   | 1.15 | 0.15 | 13 |
| 7 F37C4.5a  | VHLNTPEAVEVDEASVEPTVGAAITPEK | 54 | 5701   | 1.16 | 0.09 | 7  |
| 7 F37C4.5a  | SSNIASEFSIGRPATIDDRTDEYK     | 20 | 3704   | 1.18 | 0.32 | 27 |
| 7 F37C4.5a  | RIEGLDNLITEVAK               | 49 | 2301   | 1.22 | 0.13 | 11 |
| 22 F37C4.5a | SSNIASEFSIGRPATIDDRTDEYK     | 18 | 4999   | 1.25 | 0.32 | 25 |
| 7 F37C4.5a  | VADSRVAVQK                   | 23 | 3437   | 1.26 | 0.04 | 4  |
| 7 F37C4.5a  | RIEGLDNLITEVAK               | 78 | 3072   | 1.26 | 0.10 | 8  |
| 10 F37C4.5a | NQEGAEFVIPERVLAIK            | 39 | 1329   | 1.27 | 0.26 | 20 |
| 10 F37C4.5a | VADSRVAVQK                   | 59 | 12206  | 1.28 | 0.08 | 6  |
| 7 F37C4.5a  | TVPLVLSTARPAHGVK             | 11 | 13117  | 1.28 | 0.24 | 18 |
| 7 F37C4.5a  | VHLNTPEAVEVDEASVEPTVGAAITPEK | 93 | 5178   | 1.35 | 0.12 | 9  |
| 22 F37C4.5a | RTFQVELAHGYNEVK              | 10 | 2978   | 1.36 | 0.16 | 11 |
| 7 F37C4.5a  | YTTEHPQAEQIRYEEK             | 24 | 7791   | 1.39 | 0.21 | 15 |
| 22 F37C4.5a | RTFQVELAHGYNEVK              | 15 | 2873   | 1.39 | 0.26 | 18 |
| 22 F37C4.5a | VADSRVAVQK                   | 42 | 18823  | 1.41 | 0.11 | 8  |
| 22 F37C4.5a | RIEGLDNLITEVAK               | 45 | 1188   | 1.43 | 0.16 | 11 |
| 7 F37C4.5a  | VRQYSGEDWK                   | 11 | 5998   | 1.44 | 0.06 | 4  |
| 7 F37C4.5a  | RIEGLDNLITEVAK               | 42 | 1193   | 1.45 | 0.21 | 14 |
| 22 F37C4.5a | VADSRVAVQK                   | 76 | 26798  | 1.46 | 0.11 | 7  |
| 10 F37C4.5a | TVPLVLSTARPAHGVK             | 16 | 16212  | 1.49 | 0.06 | 4  |
| 7 F37C4.5a  | YTTEHPQAEQIRYEEK             | 11 | 5955   | 1.57 | 0.18 | 11 |
| 7 F37C4.5a  | RTFQVELAHGYNEVK              | 14 | 4479   | 1.61 | 0.08 | 5  |
| 22 F37C4.5a | RIEGLDNLITEVAK               | 84 | 6444   | 1.64 | 0.07 | 4  |
| 22 F37C4.5a | VADSRVAVQK                   | 11 | 3884   | 1.94 | 0.21 | 11 |
| 22 F37C4.5a | VADSRVAVQK                   | 44 | 4711   | 2.18 | 0.19 | 9  |
| 10 F37C4.5a | VADSRVAVQK                   | 27 | 6994   | 3.18 | 0.30 | 9  |
| 10 F37C4.5a | NQEGAEFVIPERVLAIK            | 26 | 2395   | 3.52 | 0.16 | 5  |
| 10 F37C4.5a | RTFQVELAHGYNEVK              | 29 | 7976   | 4.17 | 0.18 | 4  |
| 10 F37C4.5a | RIEGLDNLITEVAK               | 71 | 1955   | 4.23 | 0.24 | 6  |

|                      |                              |    |       |      |      |     |
|----------------------|------------------------------|----|-------|------|------|-----|
| 10 F37C4.5a          | RTFQVELAHGYNEVK              | 20 | 4709  | 4.46 | 0.15 | 3   |
| 10 F37C4.5a          | NQEGAEFVIPERVLAIK            | 19 | 2476  | 5.00 | 0.21 | 4   |
| 10 F37C4.5a          | VADSRVAVQK                   | 37 | 7128  | 5.04 | 0.05 | 1   |
| 10 F37C4.5a          | NQEGAEFVIPERVLAIK            | 49 | 2220  | 5.16 | 0.29 | 6   |
| 10 F37C4.5a          | RIEGLDNLITEVAK               | 79 | 2505  | 5.55 | 0.20 | 4   |
| 1 F37C4.5a;F37C4.5b  | VADSRVAVQK                   | 16 | 1163  | 0.21 | 0.23 | 110 |
| 1 F37C4.5a;F37C4.5b  | RIEGLDNLITEVAK               | 87 | 1214  | 0.39 | 0.11 | 29  |
| 1 F37C4.5a;F37C4.5b  | RIEGLDNLITEVAK               | 29 | 618   | 0.41 | 0.15 | 38  |
| 1 F37C4.5a;F37C4.5b  | RIEGLDNLITEVAK               | 26 | 469   | 0.51 | 0.27 | 52  |
| 1 F37C4.5a;F37C4.5b  | RIEGLDNLITEVAK               | 38 | 915   | 0.51 | 0.18 | 34  |
| 1 F37C4.5a;F37C4.5b  | NQEGAEFVIPERVLAIK            | 16 | 547   | 0.54 | 0.15 | 27  |
| 1 F37C4.5a;F37C4.5b  | NQEGAEFVIPERVLAIK            | 20 | 1173  | 0.74 | 0.18 | 25  |
| 1 F37C4.5a;F37C4.5b  | SSNIASEFSIGRPATIDDRTDEYK     | 11 | 4070  | 0.79 | 0.12 | 15  |
| 1 F37C4.5a;F37C4.5b  | NQEGAEFVIPERVLAIK            | 21 | 1543  | 0.82 | 0.12 | 15  |
| 1 F37C4.5a;F37C4.5b  | RIEGLDNLITEVAK               | 47 | 1626  | 0.88 | 0.19 | 21  |
| 1 F37C4.5a;F37C4.5b  | RIEGLDNLITEVAK               | 52 | 1381  | 0.90 | 0.08 | 9   |
| 1 F37C4.5a;F37C4.5b  | VHLNTPEAVEVDEASVEPTVGAAITPEK | 42 | 6169  | 0.93 | 0.11 | 12  |
| 1 F37C4.5a;F37C4.5b  | NQEGAEFVIPERVLAIK            | 31 | 1981  | 1.01 | 0.15 | 15  |
| 1 F37C4.5a;F37C4.5b  | VHLNTPEAVEVDEASVEPTVGAAITPEK | 74 | 6176  | 1.01 | 0.14 | 14  |
| 1 F37C4.5a;F37C4.5b  | VHLNTPEAVEVDEASVEPTVGAAITPEK | 58 | 5206  | 1.14 | 0.09 | 8   |
| 1 F37C4.5a;F37C4.5b  | VHLNTPEAVEVDEASVEPTVGAAITPEK | 58 | 4888  | 1.29 | 0.16 | 12  |
| 1 F37C4.5a;F37C4.5b  | VNIGQFTLDTK                  | 30 | 1458  | 1.58 | 0.21 | 13  |
| 1 F37C4.5a;F37C4.5b  | NQEGAEFVIPERVLAIK            | 21 | 1212  | 1.63 | 0.07 | 4   |
| 22 F37E3.1           | IIAALPQDFVK                  | 12 | 1028  | 1.23 | 0.16 | 13  |
| 10 F37E3.1           | IIAALPQDFVK                  | 19 | 913   | 2.04 | 0.18 | 9   |
| 10 F37E3.1           | RRRGAPLIEDVEK                | 15 | 5578  | 2.78 | 0.12 | 4   |
| 22 F37H8.5           | AAAATANVWPEQHK               | 71 | 8668  | 0.45 | 0.20 | 44  |
| 1 F37H8.5            | AAAATANVWPEQHK               | 29 | 7748  | 0.59 | 0.13 | 21  |
| 22 F37H8.5           | AAAATANVWPEQHK               | 20 | 3323  | 0.86 | 0.28 | 32  |
| 7 F37H8.5            | AAAATANVWPEQHK               | 87 | 5641  | 0.88 | 0.05 | 6   |
| 22 F37H8.5           | AAAATANVWPEQHK               | 28 | 9207  | 0.91 | 0.25 | 27  |
| 22 F37H8.5           | AAAATANVWPEQHK               | 73 | 6112  | 0.95 | 0.11 | 11  |
| 1 F37H8.5            | LGADLQNK                     | 19 | 2175  | 0.97 | 0.12 | 12  |
| 10 F37H8.5           | AAAATANVWPEQHK               | 87 | 14969 | 0.99 | 0.15 | 15  |
| 10 F37H8.5           | AAAATANVWPEQHK               | 16 | 8028  | 1.00 | 0.19 | 19  |
| 1 F37H8.5            | AAAATANVWPEQHK               | 75 | 6734  | 1.07 | 0.09 | 8   |
| 10 F37H8.5           | AAAATANVWPEQHK               | 66 | 11256 | 1.14 | 0.13 | 11  |
| 7 F37H8.5            | QLYPIVFK                     | 15 | 4503  | 1.16 | 0.10 | 9   |
| 22 F37H8.5           | AAAATANVWPEQHK               | 17 | 4248  | 1.18 | 0.19 | 16  |
| 1 F37H8.5            | QLYPIVFK                     | 16 | 4596  | 1.19 | 0.07 | 6   |
| 1 F37H8.5            | AAAATANVWPEQHK               | 79 | 6694  | 1.26 | 0.12 | 9   |
| 1 F37H8.5            | QLYPIVFK                     | 40 | 4794  | 1.27 | 0.05 | 4   |
| 22 F37H8.5           | QLYPIVFK                     | 16 | 4359  | 1.42 | 0.06 | 5   |
| 10 F37H8.5           | QLYPIVFK                     | 10 | 5499  | 1.59 | 0.13 | 8   |
| 22 F37H8.5           | QLYPIVFK                     | 16 | 3976  | 1.86 | 0.28 | 15  |
| 10 F37H8.5           | QLYPIVFK                     | 15 | 8328  | 2.01 | 0.07 | 4   |
| 10 F38A1.8           | DPAGLAAAAIK                  | 12 | 1438  | 2.14 | 0.13 | 6   |
| 7 F38B2.4a           | AAGVPIFFIVGGPGSGK            | 73 | 1593  | 0.70 | 0.11 | 16  |
| 10 F38B2.4a          | AAGVPIFFIVGGPGSGK            | 74 | 1980  | 0.70 | 0.19 | 28  |
| 7 F38B2.4a           | YGLTHLSSGDLLRDEVK            | 20 | 7994  | 0.78 | 0.09 | 12  |
| 7 F38B2.4a           | AAGVPIFFIVGGPGSGK            | 72 | 1589  | 0.78 | 0.14 | 18  |
| 10 F38B2.4a          | AAGVPIFFIVGGPGSGK            | 70 | 2396  | 0.80 | 0.17 | 21  |
| 1 F38B2.4a           | AAGVPIFFIVGGPGSGK            | 35 | 554   | 0.91 | 0.13 | 15  |
| 22 F38B2.4a          | YGLTHLSSGDLLRDEVK            | 16 | 3927  | 0.96 | 0.14 | 14  |
| 1 F38B2.4a           | NINLAPLK                     | 14 | 2119  | 0.99 | 0.20 | 21  |
| 22 F38B2.4a          | AAGVPIFFIVGGPGSGK            | 53 | 2096  | 0.99 | 0.14 | 14  |
| 22 F38B2.4a          | GFLIDGYPREVAQQGQFSEIQEAK     | 82 | 6721  | 1.03 | 0.15 | 14  |
| 22 F38B2.4a          | YGLTHLSSGDLLRDEVK            | 18 | 6531  | 1.04 | 0.14 | 13  |
| 22 F38B2.4a          | AAGVPIFFIVGGPGSGK            | 41 | 1039  | 1.27 | 0.19 | 15  |
| 1 F38B2.4a           | YGLTHLSSGDLLRDEVK            | 15 | 5083  | 1.34 | 0.07 | 6   |
| 1 F38B2.4a           | AAGVPIFFIVGGPGSGK            | 55 | 729   | 2.33 | 0.33 | 14  |
| 1 F38B2.4a           | GFLIDGYPREVAQQGQFSEIQEAK     | 21 | 560   | 2.70 | 0.23 | 8   |
| 22 F38E11.3          | LFEYASEHK                    | 11 | 1453  | 1.00 | 0.21 | 21  |
| 22 F38H4.8b;F38H4.8a | SFSAGHELK                    | 23 | 1974  | 0.74 | 0.09 | 12  |
| 22 F38H4.8b;F38H4.8a | RPADFEHTNDLVEEVK             | 15 | 1875  | 0.81 | 0.11 | 13  |
| 22 F38H4.8b;F38H4.8a | SFSAGHELK                    | 35 | 2180  | 0.95 | 0.08 | 9   |
| 22 F38H4.8b;F38H4.8a | RPADFEHTNDLVEEVK             | 18 | 2007  | 1.05 | 0.23 | 22  |
| 10 F39C12.1          | LVEYLDQNYK                   | 14 | 2312  | 0.28 | 0.55 | 194 |
| 22 F39C12.1          | FETTRK                       | 11 | 791   | 3.94 | 0.15 | 4   |
| 1 F39C12.1;ZC53.2    | FETTRK                       | 10 | 484   | 1.53 | 0.19 | 12  |
| 1 F39C12.1;ZC53.2    | FETTRK                       | 12 | 525   | 1.94 | 0.13 | 7   |
| 1 F39H11.5           | RFDQDIGPK                    | 60 | 12299 | 0.80 | 0.06 | 8   |
| 7 F39H11.5           | ETSTPFIGVITQK                | 21 | 2163  | 0.80 | 0.12 | 15  |
| 7 F39H11.5           | ETSTPFIGVITQK                | 13 | 1390  | 1.02 | 0.18 | 18  |
| 7 F39H11.5           | ETSTPFIGVITQK                | 14 | 1856  | 1.06 | 0.21 | 20  |
| 10 F40A3.3a;F40A3.3b | HEVIPDVLASNPPSK              | 25 | 7680  | 0.49 | 0.79 | 161 |
| 10 F40A3.3a;F40A3.3b | FNSGV EANLGNVLTPTQVK         | 58 | 2011  | 1.26 | 0.15 | 12  |
| 22 F40A3.3b;F40A3.3a | HEVIPDVLASNPPSK              | 17 | 5456  | 0.19 | 0.26 | 135 |
| 7 F40A3.3b;F40A3.3a  | GDTLSEYIGAGPPPK              | 67 | 4589  | 0.83 | 0.08 | 10  |
| 7 F40A3.3b;F40A3.3a  | HEVIPDVLASNPPSK              | 22 | 11021 | 0.98 | 0.12 | 12  |
| 7 F40A3.3b;F40A3.3a  | GDTLSEYIGAGPPPK              | 86 | 5170  | 0.99 | 0.11 | 11  |
| 10 F40F4.6           | TSNNDAGHNLIQVEGVTNSGYK       | 43 | 2476  | 0.62 | 0.11 | 17  |
| 10 F40F4.6           | SPIYVITDATPNDSA EK           | 56 | 1517  | 0.70 | 0.18 | 26  |
| 10 F40F4.6           | TSNNDAGHNLIQVEGVTNSGYK       | 14 | 2044  | 0.81 | 0.16 | 20  |
| 10 F40F4.6           | SPIYVITDATPNDSA EK           | 51 | 2198  | 0.96 | 0.17 | 18  |
| 22 F40F4.6           | TSNNDAGHNLIQVEGVTNSGYK       | 31 | 2417  | 1.00 | 0.12 | 12  |
| 22 F40F4.6           | TSNNDAGHNLIQVEGVTNSGYK       | 43 | 3441  | 1.22 | 0.17 | 14  |
| 22 F40F8.10          | LDYVLGLK                     | 49 | 3289  | 0.29 | 0.16 | 57  |
| 10 F40F8.10          | LDYVLGLK                     | 48 | 3020  | 0.32 | 0.13 | 40  |
| 10 F40F8.10          | LDYVLGLK                     | 40 | 2056  | 0.43 | 0.17 | 41  |
| 1 F40F8.10           | LDYVLGLK                     | 10 | 206   | 0.44 | 0.20 | 45  |
| 10 F40F8.10          | LIGTFGLK                     | 47 | 4118  | 0.45 | 0.51 | 112 |
| 1 F40F8.10           | LIGTFGLK                     | 80 | 5095  | 0.52 | 0.12 | 23  |
| 22 F40F8.10          | LDYVLGLK                     | 39 | 2604  | 0.54 | 0.13 | 23  |
| 10 F40F8.10          | SIHHARILIK                   | 26 | 3889  | 0.55 | 0.38 | 69  |
| 10 F40F8.10          | AARELLTLEDK                  | 39 | 16420 | 0.55 | 0.12 | 22  |
| 10 F40F8.10          | LIGTFGLK                     | 45 | 5613  | 0.61 | 0.11 | 19  |
| 1 F40F8.10           | AARELLTLEDK                  | 36 | 6357  | 0.62 | 0.09 | 14  |
| 1 F40F8.10           | AARELLTLEDK                  | 54 | 5231  | 0.62 | 0.10 | 16  |
| 1 F40F8.10           | LIGTFGLK                     | 61 | 7859  | 0.63 | 0.08 | 12  |
| 1 F40F8.10           | LDYVLGLK                     | 20 | 287   | 0.67 | 0.10 | 14  |

|                      |                     |    |        |       |      |     |
|----------------------|---------------------|----|--------|-------|------|-----|
| 10 F40F8.10          | IGVLDETK            | 21 | 1440   | 0.69  | 0.68 | 99  |
| 22 F40F8.10          | AARELLTLEDK         | 50 | 43254  | 0.71  | 0.07 | 9   |
| 7 F40F8.10           | LDYVLGLK            | 11 | 627    | 0.71  | 0.18 | 26  |
| 10 F40F8.10          | AARELLTLEDK         | 43 | 21042  | 0.77  | 0.10 | 14  |
| 22 F40F8.10          | AARELLTLEDK         | 58 | 57500  | 0.83  | 0.14 | 17  |
| 22 F40F8.10          | LIGTFGLK            | 69 | 96043  | 0.88  | 0.11 | 13  |
| 22 F40F8.10          | HIDFSLQSPYGGGRPGRVK | 20 | 13151  | 0.94  | 0.16 | 17  |
| 22 F40F8.10          | LIGTFGLK            | 60 | 79964  | 0.95  | 0.09 | 10  |
| 1 F40F8.10           | AARELLTLEDK         | 25 | 3662   | 0.99  | 0.10 | 11  |
| 22 F40F8.10          | RLFEGNALLRRLVK      | 25 | 7545   | 1.00  | 0.28 | 28  |
| 7 F40F8.10           | AARELLTLEDK         | 17 | 4136   | 1.03  | 0.18 | 17  |
| 22 F40F8.10          | HIDFSLQSPYGGGRPGRVK | 15 | 8363   | 1.03  | 0.12 | 11  |
| 10 F40F8.10          | AARELLTLEDK         | 39 | 7632   | 1.04  | 0.16 | 15  |
| 22 F40F8.10          | HIDFSLQSPYGGGRPGRVK | 21 | 68848  | 1.07  | 0.12 | 11  |
| 22 F40F8.10          | HIDFSLQSPYGGGRPGRVK | 31 | 119450 | 1.08  | 0.19 | 18  |
| 7 F40F8.10           | AARELLTLEDK         | 39 | 5106   | 1.08  | 0.09 | 8   |
| 1 F40F8.10           | AARELLTLEDK         | 38 | 2482   | 1.10  | 0.14 | 13  |
| 22 F40F8.10          | ERLDQELK            | 22 | 10638  | 1.14  | 0.04 | 4   |
| 22 F40F8.10          | RLFEGNALLRRLVK      | 20 | 3776   | 1.14  | 0.47 | 41  |
| 7 F40F8.10           | HIDFSLQSPYGGGRPGRVK | 15 | 8437   | 1.21  | 0.12 | 10  |
| 22 F40F8.10          | RLFEGNALLRRLVK      | 11 | 6360   | 1.22  | 0.25 | 21  |
| 22 F40F8.10          | SIHHARILIK          | 24 | 9273   | 1.29  | 0.03 | 2   |
| 22 F40F8.10          | SIHHARILIK          | 21 | 9738   | 1.29  | 0.10 | 7   |
| 22 F40F8.10          | HIDFSLQSPYGGGRPGRVK | 20 | 6426   | 1.29  | 0.20 | 16  |
| 10 F40F8.10          | HIDFSLQSPYGGGRPGRVK | 26 | 22880  | 1.31  | 0.12 | 9   |
| 22 F40F8.10          | HIDFSLQSPYGGGRPGRVK | 15 | 16904  | 1.33  | 0.14 | 11  |
| 10 F40F8.10          | HIDFSLQSPYGGGRPGRVK | 24 | 15782  | 1.35  | 0.24 | 18  |
| 10 F40F8.10          | LIGTFGLK            | 27 | 7925   | 1.41  | 0.23 | 16  |
| 22 F40F8.10          | LIGTFGLK            | 28 | 1219   | 1.46  | 0.19 | 13  |
| 10 F40F8.10          | LIGTFGLK            | 31 | 10483  | 1.47  | 0.20 | 14  |
| 22 F40F8.10          | SIHHARILIK          | 14 | 7600   | 1.49  | 0.09 | 6   |
| 1 F40F8.10           | HIDFSLQSPYGGGRPGRVK | 20 | 10039  | 1.51  | 0.14 | 9   |
| 7 F40F8.10           | AARELLTLEDK         | 38 | 6108   | 1.53  | 0.11 | 7   |
| 1 F40F8.10           | HIDFSLQSPYGGGRPGRVK | 10 | 5049   | 1.55  | 0.25 | 16  |
| 1 F40F8.10           | ERLDQELK            | 20 | 7659   | 1.58  | 0.17 | 11  |
| 10 F40F8.10          | IGVLDETK            | 14 | 1022   | 1.58  | 0.40 | 25  |
| 1 F40F8.10           | HIDFSLQSPYGGGRPGRVK | 16 | 7863   | 1.59  | 0.17 | 11  |
| 10 F40F8.10          | ERLDQELK            | 17 | 9672   | 1.61  | 0.09 | 5   |
| 10 F40F8.10          | LDYVLGLK            | 37 | 2080   | 1.66  | 0.13 | 8   |
| 10 F40F8.10          | LDYVLGLK            | 57 | 2408   | 1.67  | 0.08 | 5   |
| 10 F40F8.10          | HIDFSLQSPYGGGRPGRVK | 26 | 73682  | 1.68  | 0.28 | 17  |
| 22 F40F8.10          | LDYVLGLK            | 61 | 3216   | 1.72  | 0.08 | 5   |
| 10 F40F8.10          | HIDFSLQSPYGGGRPGRVK | 22 | 29011  | 1.76  | 0.17 | 10  |
| 7 F40F8.10           | LDYVLGLK            | 13 | 632    | 1.78  | 0.14 | 8   |
| 22 F40F8.10          | SIHHARILIK          | 13 | 4975   | 1.88  | 0.13 | 7   |
| 10 F40F8.10          | SIHHARILIK          | 11 | 26901  | 1.94  | 0.23 | 12  |
| 22 F40F8.10          | HIDFSLQSPYGGGRPGRVK | 39 | 20869  | 1.95  | 0.14 | 7   |
| 22 F40F8.10          | HIDFSLQSPYGGGRPGRVK | 29 | 10058  | 1.97  | 0.16 | 8   |
| 10 F40F8.10          | REVWRVK             | 13 | 9056   | 2.00  | 0.14 | 7   |
| 1 F40F8.10           | REVWRVK             | 11 | 2300   | 2.21  | 0.08 | 4   |
| 10 F40F8.10          | HIDFSLQSPYGGGRPGRVK | 19 | 21718  | 2.52  | 0.21 | 8   |
| 22 F40F8.10          | HIDFSLQSPYGGGRPGRVK | 11 | 17556  | 2.57  | 0.12 | 5   |
| 7 F40F8.10           | HIDFSLQSPYGGGRPGRVK | 12 | 13852  | 2.64  | 0.12 | 5   |
| 1 F40F8.10           | HIDFSLQSPYGGGRPGRVK | 16 | 14087  | 2.75  | 0.17 | 6   |
| 22 F40F8.10          | LDYVLGLK            | 23 | 1433   | 2.93  | 0.20 | 7   |
| 10 F40F8.10          | SIHHARILIK          | 18 | 21203  | 3.39  | 0.51 | 15  |
| 22 F40F8.10          | LIGTFGLK            | 23 | 2195   | 3.60  | 0.30 | 8   |
| 22 F40F9.6a;F40F9.6b | DTFNVQVK            | 40 | 2326   | 0.08  | 0.13 | 160 |
| 22 F40F9.6a;F40F9.6b | DTFNVQVK            | 45 | 2618   | 0.08  | 0.19 | 222 |
| 22 F40F9.6a;F40F9.6b | MVTIVDPHIK          | 42 | 6530   | 0.11  | 0.67 | 624 |
| 22 F40F9.6a;F40F9.6b | DTFNVQVK            | 33 | 1666   | 0.13  | 0.20 | 159 |
| 10 F40F9.6a;F40F9.6b | VEEFRTK             | 21 | 2251   | 0.34  | 0.29 | 84  |
| 10 F40F9.6a;F40F9.6b | VEEFRTK             | 13 | 1423   | 0.34  | 0.26 | 76  |
| 1 F40F9.6a;F40F9.6b  | DTFNVQVK            | 30 | 479    | 0.43  | 0.20 | 46  |
| 10 F40F9.6a;F40F9.6b | EYPEGFWEEFK         | 11 | 1420   | 0.45  | 0.10 | 21  |
| 22 F40F9.6a;F40F9.6b | VEEFRTK             | 17 | 2652   | 0.52  | 0.54 | 104 |
| 10 F40F9.6a;F40F9.6b | NSAMLEGEHLDGK       | 41 | 2333   | 0.55  | 0.16 | 28  |
| 22 F40F9.6a;F40F9.6b | VEEFRTK             | 16 | 2257   | 0.56  | 0.40 | 71  |
| 10 F40F9.6a;F40F9.6b | EYPEGFWEEFK         | 15 | 1447   | 0.58  | 0.17 | 29  |
| 10 F40F9.6a;F40F9.6b | NSAMLEGEHLDGK       | 61 | 2524   | 0.62  | 0.18 | 30  |
| 10 F40F9.6a;F40F9.6b | QWMVGSILARPVVEK     | 14 | 2373   | 0.63  | 0.15 | 24  |
| 10 F40F9.6a;F40F9.6b | QWMVGSILARPVVEK     | 43 | 4882   | 0.64  | 0.14 | 21  |
| 10 F40F9.6a;F40F9.6b | DTFNVQVK            | 50 | 3096   | 0.64  | 0.15 | 23  |
| 10 F40F9.6a;F40F9.6b | DTFNVQVK            | 60 | 2807   | 0.74  | 0.11 | 15  |
| 10 F40F9.6a;F40F9.6b | NSAMLEGEHLDGK       | 69 | 4402   | 0.75  | 0.14 | 19  |
| 10 F40F9.6a;F40F9.6b | YFTWDK              | 11 | 1730   | 0.77  | 0.11 | 15  |
| 10 F40F9.6a;F40F9.6b | QWMVGSILARPVVEK     | 25 | 2557   | 0.82  | 0.14 | 17  |
| 10 F40F9.6a;F40F9.6b | NSAMLEGEHLDGK       | 53 | 2724   | 0.92  | 0.13 | 15  |
| 10 F40F9.6a;F40F9.6b | MVTIVDPHIK          | 41 | 4952   | 0.96  | 0.14 | 15  |
| 10 F40F9.6a;F40F9.6b | MVTIVDPHIK          | 30 | 3623   | 1.10  | 0.13 | 12  |
| 7 F40F9.6a;F40F9.6b  | MVTIVDPHIK          | 24 | 6739   | 1.65  | 0.17 | 10  |
| 10 F40F9.6a;F40F9.6b | MVTIVDPHIK          | 19 | 3262   | 1.67  | 0.14 | 8   |
| 1 F40F9.6a;F40F9.6b  | QWMVGSILARPVVEK     | 20 | 1591   | 1.77  | 0.16 | 9   |
| 10 F40F9.6a;F40F9.6b | MVTIVDPHIK          | 29 | 3836   | 1.95  | 0.22 | 11  |
| 1 F40F9.6a;F40F9.6b  | MVTIVDPHIK          | 35 | 1625   | 2.02  | 0.12 | 6   |
| 7 F40F9.6a;F40F9.6b  | MVTIVDPHIK          | 22 | 6583   | 2.13  | 0.10 | 5   |
| 10 F40F9.6a;F40F9.6b | MVTIVDPHIK          | 14 | 986    | 2.22  | 0.06 | 3   |
| 1 F40F9.6a;F40F9.6b  | MVTIVDPHIK          | 47 | 1176   | 2.42  | 0.13 | 6   |
| 10 F40F9.6a;F40F9.6b | MVTIVDPHIK          | 42 | 4774   | 2.47  | 0.24 | 10  |
| 22 F40F9.6a;F40F9.6b | NWIERVVVRGVESSPK    | 13 | 1528   | 2.57  | 0.12 | 5   |
| 1 F40F9.6a;F40F9.6b  | MVTIVDPHIK          | 28 | 1434   | 2.78  | 0.20 | 7   |
| 22 F40F9.6a;F40F9.6b | MVTIVDPHIK          | 24 | 3885   | 2.99  | 0.84 | 28  |
| 22 F40F9.6a;F40F9.6b | VLVIRKPEALLTSSFK    | 23 | 3498   | 3.42  | 0.17 | 5   |
| 22 F40F9.6a;F40F9.6b | DTFNVQVK            | 31 | 1199   | 4.69  | 0.30 | 6   |
| 1 F40F9.6a;F40F9.6b  | MVTIVDPHIK          | 30 | 911    | 5.13  | 0.15 | 3   |
| 7 F40F9.6a;F40F9.6b  | MVTIVDPHIK          | 35 | 2117   | 7.49  | 0.30 | 4   |
| 22 F40F9.6a;F40F9.6b | NSAMLEGEHLDGK       | 45 | 1799   | 8.05  | 0.31 | 4   |
| 22 F40F9.6a;F40F9.6b | MVTIVDPHIK          | 29 | 3193   | 10.24 | 0.22 | 2   |
| 22 F40F9.6a;F40F9.6b | NSAMLEGEHLDGK       | 60 | 3079   | 23.54 | 0.31 | 1   |
| 1 F40G9.3            | NAGYQALVDK          | 73 | 2288   | 1.36  | 0.16 | 12  |
| 22 F41C3.3           | RVIVLDDLPRNHITK     | 15 | 1107   | 1.56  | 0.18 | 12  |

|             |                      |    |       |      |      |     |
|-------------|----------------------|----|-------|------|------|-----|
| 10 F41C3.5  | DLPGLDFEPNFK         | 15 | 3016  | 0.61 | 0.16 | 27  |
| 7 F41C3.5   | GMALGNGYVNEK         | 26 | 1335  | 0.81 | 0.11 | 13  |
| 10 F41C3.5  | DLPGLDFEPNFK         | 16 | 1782  | 0.94 | 0.13 | 14  |
| 7 F41C3.5   | GMALGNGYVNEK         | 27 | 1719  | 0.96 | 0.15 | 16  |
| 7 F41C3.5   | DLPGLDFEPNFK         | 12 | 1822  | 1.09 | 0.28 | 26  |
| 7 F41C3.5   | DLPGLDFEPNFK         | 20 | 3591  | 1.14 | 0.07 | 6   |
| 7 F41C3.5   | DLPGLDFEPNFK         | 14 | 2007  | 1.14 | 0.11 | 10  |
| 1 F41C3.5   | DLPGLDFEPNFK         | 11 | 2272  | 1.18 | 0.20 | 17  |
| 10 F41C3.5  | TLRENEYSWNK          | 30 | 5229  | 1.37 | 0.08 | 6   |
| 10 F41C3.5  | GMALGNGYVNEK         | 43 | 7069  | 1.37 | 0.10 | 7   |
| 22 F41C3.5  | TLRENEYSWNK          | 21 | 2521  | 1.45 | 0.09 | 6   |
| 7 F41C3.5   | GMALGNGYVNEK         | 40 | 2316  | 1.47 | 0.11 | 8   |
| 22 F41C3.5  | TLRENEYSWNK          | 20 | 4054  | 1.53 | 0.24 | 15  |
| 22 F41C3.5  | GMALGNGYVNEK         | 27 | 3511  | 1.55 | 0.12 | 8   |
| 1 F41C3.5   | GMALGNGYVNEK         | 52 | 5801  | 1.57 | 0.13 | 9   |
| 1 F41C3.5   | GMALGNGYVNEK         | 45 | 2132  | 1.75 | 0.15 | 8   |
| 7 F41C3.5   | GMALGNGYVNEK         | 11 | 1380  | 1.75 | 0.11 | 6   |
| 7 F41C3.5   | GMALGNGYVNEK         | 43 | 4042  | 1.96 | 0.16 | 8   |
| 22 F41C3.5  | GMALGNGYVNEK         | 12 | 1426  | 2.37 | 0.12 | 5   |
| 22 F42A10.1 | APARASSLLYGLGFTPDEQK | 17 | 1989  | 0.63 | 0.20 | 31  |
| 22 F42A10.1 | APARASSLLYGLGFTPDEQK | 19 | 2401  | 0.89 | 0.15 | 17  |
| 1 F42C5.8   | FELGRPAANTK          | 35 | 2352  | 0.35 | 0.10 | 29  |
| 10 F42C5.8  | FELGRPAANTK          | 36 | 4155  | 0.46 | 0.14 | 30  |
| 1 F42C5.8   | LSEEDNAILNK          | 37 | 2403  | 0.48 | 0.17 | 37  |
| 7 F42C5.8   | ELDFYL RK            | 19 | 14971 | 0.52 | 0.21 | 39  |
| 1 F42C5.8   | TGATQPVPHK           | 58 | 4481  | 0.56 | 0.20 | 35  |
| 1 F42C5.8   | LSEEDNAILNK          | 22 | 1637  | 0.57 | 0.13 | 23  |
| 7 F42C5.8   | TGATQPVPHK           | 26 | 1396  | 0.59 | 0.14 | 24  |
| 1 F42C5.8   | ELDFYL RK            | 19 | 3066  | 0.62 | 0.11 | 18  |
| 1 F42C5.8   | ELDFYL RK            | 17 | 17380 | 0.64 | 0.11 | 17  |
| 1 F42C5.8   | TGATQPVPHK           | 23 | 3355  | 0.68 | 0.14 | 20  |
| 1 F42C5.8   | ELDFYL RK            | 18 | 15699 | 0.71 | 0.09 | 12  |
| 10 F42C5.8  | ELDFYL RK            | 24 | 12762 | 0.73 | 0.12 | 16  |
| 1 F42C5.8   | ELDFYL RK            | 18 | 7302  | 0.76 | 0.10 | 12  |
| 10 F42C5.8  | ELDFYL RK            | 14 | 4386  | 0.81 | 0.26 | 32  |
| 7 F42C5.8   | ELDFYL RK            | 10 | 2415  | 0.82 | 0.06 | 7   |
| 10 F42C5.8  | ELDFYL RK            | 26 | 5045  | 0.98 | 0.24 | 25  |
| 10 F42C5.8  | ELDFYL RK            | 13 | 3037  | 1.07 | 0.37 | 34  |
| 7 F42C5.8   | LSEEDNAILNK          | 12 | 1159  | 1.10 | 0.12 | 11  |
| 10 F42C5.8  | FELGRPAANTK          | 20 | 3635  | 1.53 | 0.11 | 7   |
| 10 F42C5.8  | TGATQPVPHK           | 41 | 13085 | 1.53 | 0.14 | 9   |
| 10 F42C5.8  | TGATQPVPHK           | 41 | 6445  | 1.58 | 0.08 | 5   |
| 10 F42C5.8  | LSEEDNAILNK          | 10 | 1661  | 1.65 | 0.15 | 9   |
| 10 F42C5.8  | ELDFYL RK            | 12 | 3658  | 1.91 | 0.07 | 4   |
| 10 F42C5.8  | ELDFYL RK            | 10 | 5750  | 1.99 | 0.15 | 7   |
| 10 F42C5.8  | ELDFYL RK            | 16 | 4661  | 2.02 | 0.07 | 3   |
| 10 F42C5.8  | TGATQPVPHK           | 27 | 2385  | 2.18 | 0.11 | 5   |
| 10 F42C5.8  | GISRDSWHK            | 12 | 16223 | 2.60 | 0.14 | 5   |
| 7 F42C5.8   | FELGRPAANTK          | 15 | 2289  | 2.60 | 0.14 | 5   |
| 10 F42C5.8  | GISRDSWHK            | 23 | 13367 | 2.66 | 0.15 | 6   |
| 22 F42C5.8  | GISRDSWHK            | 29 | 11408 | 2.75 | 0.13 | 5   |
| 22 F42C5.8  | ELDFYL RK            | 13 | 5819  | 3.14 | 0.08 | 3   |
| 10 F42C5.8  | GISRDSWHK            | 23 | 4203  | 3.84 | 0.13 | 3   |
| 7 F42C5.8   | TGATQPVPHK           | 34 | 2072  | 3.88 | 0.23 | 6   |
| 7 F42C5.8   | TGATQPVPHK           | 34 | 2712  | 4.75 | 0.05 | 1   |
| 10 F42G9.1a | SLLSAFLAK            | 22 | 721   | 1.82 | 0.20 | 11  |
| 7 F43E2.5   | FYQAEDYH QK          | 44 | 3700  | 0.13 | 0.21 | 153 |
| 7 F43E2.5   | FYQAEDYH QK          | 43 | 3971  | 0.15 | 0.25 | 169 |
| 7 F43E2.5   | GVVVTRVG YAGGK       | 54 | 4230  | 0.34 | 0.22 | 63  |
| 10 F43E2.5  | FYQAEDYH QK          | 27 | 9768  | 0.36 | 0.06 | 15  |
| 7 F43E2.5   | GVVVTRVG YAGGK       | 50 | 5075  | 0.44 | 0.19 | 42  |
| 7 F43E2.5   | GVVVTRVG YAGGK       | 40 | 1299  | 0.45 | 0.31 | 69  |
| 22 F43E2.5  | FYQAEDYH QK          | 42 | 4063  | 0.50 | 0.14 | 29  |
| 10 F43E2.5  | FYQAEDYH QK          | 38 | 7558  | 0.55 | 0.27 | 48  |
| 7 F43E2.5   | GVVVTRVG YAGGK       | 48 | 1737  | 0.55 | 0.35 | 64  |
| 22 F43E2.5  | FYQAEDYH QK          | 45 | 4730  | 0.57 | 0.14 | 24  |
| 22 F43E2.5  | LTNFFWK              | 16 | 373   | 0.74 | 0.15 | 21  |
| 1 F43E2.5   | DHTEITEITFDPK        | 19 | 2430  | 0.76 | 0.22 | 29  |
| 1 F43E2.5   | DHTEITEITFDPK        | 28 | 2174  | 0.77 | 0.16 | 20  |
| 22 F43E2.5  | HGDIETYIEPLDK        | 38 | 4124  | 0.84 | 0.10 | 12  |
| 22 F43E2.5  | FYQAEDYH QK          | 37 | 9516  | 0.89 | 0.18 | 20  |
| 22 F43E2.5  | FYQAEDYH QK          | 30 | 7559  | 0.97 | 0.11 | 12  |
| 22 F43E2.5  | DHTEITEITFDPK        | 30 | 2939  | 0.97 | 0.14 | 14  |
| 1 F43E2.5   | FYQAEDYH QK          | 10 | 5034  | 0.98 | 0.16 | 16  |
| 22 F43E2.5  | DHTEITEITFDPK        | 28 | 3080  | 0.99 | 0.18 | 19  |
| 10 F43E2.5  | FYQAEDYH QK          | 62 | 7203  | 1.05 | 0.14 | 13  |
| 10 F43E2.5  | GVVVTRVG YAGGK       | 75 | 6750  | 1.07 | 0.15 | 14  |
| 22 F43E2.5  | DHTEITEITFDPK        | 22 | 2339  | 1.12 | 0.20 | 18  |
| 1 F43E2.5   | DHTEITEITFDPK        | 32 | 1577  | 1.13 | 0.17 | 15  |
| 1 F43E2.5   | FYQAEDYH QK          | 18 | 4885  | 1.18 | 0.17 | 15  |
| 10 F43E2.5  | DHTEITEITFDPK        | 57 | 3396  | 1.19 | 0.14 | 12  |
| 10 F43E2.5  | FYQAEDYH QK          | 62 | 8856  | 1.24 | 0.16 | 13  |
| 22 F43E2.5  | FYQAEDYH QK          | 75 | 5427  | 1.42 | 0.10 | 7   |
| 10 F43E2.5  | DHTEITEITFDPK        | 47 | 3459  | 1.48 | 0.14 | 9   |
| 22 F43E2.5  | FYQAEDYH QK          | 44 | 4421  | 1.52 | 0.15 | 10  |
| 10 F43E2.5  | GVVVTRVG YAGGK       | 53 | 2677  | 1.55 | 0.18 | 12  |
| 1 F43E2.5   | GVVVTRVG YAGGK       | 59 | 3459  | 1.68 | 0.08 | 5   |
| 22 F43E2.5  | GVVVTRVG YAGGK       | 66 | 7810  | 1.77 | 0.11 | 6   |
| 1 F43E2.5   | DHTEITEITFDPK        | 13 | 671   | 1.79 | 0.10 | 5   |
| 10 F43E2.5  | HGDIETYIEPLDK        | 93 | 7765  | 1.81 | 0.07 | 4   |
| 1 F43E2.5   | HGDIETYIEPLDK        | 37 | 1073  | 1.82 | 0.13 | 7   |
| 1 F43E2.5   | GVVVTRVG YAGGK       | 64 | 3080  | 1.86 | 0.09 | 5   |
| 10 F43E2.5  | HGDIETYIEPLDK        | 95 | 6961  | 2.04 | 0.08 | 4   |
| 10 F43E2.5  | FYQAEDYH QK          | 55 | 7138  | 2.12 | 0.20 | 10  |
| 10 F43E2.5  | FYQAEDYH QK          | 23 | 5048  | 2.19 | 0.19 | 9   |
| 10 F43E2.5  | HGDIETYIEPLDK        | 90 | 6463  | 2.33 | 0.08 | 3   |
| 10 F43E2.5  | HGDIETYIEPLDK        | 70 | 5584  | 2.35 | 0.07 | 3   |
| 10 F43E2.5  | HGDIETYIEPLDK        | 76 | 6512  | 2.52 | 0.10 | 4   |
| 22 F43E2.5  | GVVVTRVG YAGGK       | 67 | 4943  | 2.69 | 0.11 | 4   |
| 22 F43E2.5  | GVVVTRVG YAGGK       | 55 | 6152  | 2.73 | 0.22 | 8   |
| 10 F43E2.5  | GVVVTRVG YAGGK       | 66 | 9176  | 2.74 | 0.24 | 9   |

|            |                      |    |       |       |      |    |
|------------|----------------------|----|-------|-------|------|----|
| 10 F43E2.5 | HGDIETYIEPLDK        | 66 | 3926  | 2.82  | 0.12 | 4  |
| 22 F43E2.5 | GVVVTRVGYAGGK        | 62 | 6221  | 3.19  | 0.15 | 5  |
| 10 F43E2.5 | GVVVTRVGYAGGK        | 40 | 4402  | 6.10  | 0.30 | 5  |
| 7 F43E2.5  | GVVVTRVGYAGGK        | 72 | 4779  | 9.01  | 0.15 | 2  |
| 7 F43E2.5  | GVVVTRVGYAGGK        | 68 | 5034  | 11.53 | 0.06 | 1  |
| 1 F43E2.8  | SNKPNVEVK            | 13 | 895   | 0.41  | 0.24 | 57 |
| 1 F43E2.8  | ELESVVQPIVSK         | 21 | 1633  | 0.44  | 0.20 | 45 |
| 1 F43E2.8  | ELESVVQPIVSK         | 32 | 1380  | 0.50  | 0.19 | 38 |
| 1 F43E2.8  | VESRNELEAYAYQMK      | 18 | 1479  | 0.52  | 0.12 | 24 |
| 1 F43E2.8  | VESRNELEAYAYQMK      | 22 | 1830  | 0.56  | 0.24 | 42 |
| 22 F43E2.8 | QFTPEEVSAMVLTk       | 30 | 504   | 0.62  | 0.04 | 6  |
| 10 F43E2.8 | ELESVVQPIVSK         | 15 | 1367  | 0.64  | 0.09 | 13 |
| 22 F43E2.8 | QIAESYLGHEVK         | 39 | 8368  | 0.65  | 0.14 | 21 |
| 1 F43E2.8  | VESRNELEAYAYQMK      | 14 | 2058  | 0.65  | 0.12 | 19 |
| 1 F43E2.8  | NAVVTVPAYFNDAQK      | 19 | 1153  | 0.69  | 0.16 | 23 |
| 1 F43E2.8  | ELESVVQPIVSK         | 40 | 1333  | 0.69  | 0.10 | 14 |
| 22 F43E2.8 | QFTPEEVSAMVLTk       | 51 | 880   | 0.71  | 0.14 | 19 |
| 1 F43E2.8  | QIAESYLGHEVK         | 26 | 1436  | 0.74  | 0.12 | 17 |
| 1 F43E2.8  | VESRNELEAYAYQMK      | 14 | 1659  | 0.76  | 0.34 | 45 |
| 10 F43E2.8 | QFTPEEVSAMVLTk       | 56 | 833   | 0.84  | 0.25 | 29 |
| 10 F43E2.8 | QIAESYLGHEVK         | 59 | 5459  | 0.85  | 0.14 | 17 |
| 7 F43E2.8  | QIAESYLGHEVK         | 47 | 3524  | 0.93  | 0.11 | 11 |
| 7 F43E2.8  | QIAESYLGHEVK         | 30 | 3025  | 0.93  | 0.16 | 17 |
| 22 F43E2.8 | QIAESYLGHEVK         | 61 | 11955 | 0.94  | 0.08 | 8  |
| 22 F43E2.8 | NAVVTVPAYFNDAQK      | 31 | 3274  | 0.94  | 0.22 | 24 |
| 1 F43E2.8  | QIAESYLGHEVK         | 32 | 1369  | 0.96  | 0.16 | 17 |
| 10 F43E2.8 | NAVVTVPAYFNDAQK      | 19 | 1596  | 0.96  | 0.13 | 14 |
| 22 F43E2.8 | NAVVTVPAYFNDAQK      | 13 | 2303  | 0.97  | 0.26 | 27 |
| 1 F43E2.8  | NAVVTVPAYFNDAQK      | 23 | 1060  | 0.98  | 0.20 | 20 |
| 7 F43E2.8  | QIAESYLGHEVK         | 48 | 3617  | 1.00  | 0.09 | 9  |
| 10 F43E2.8 | NAVVTVPAYFNDAQK      | 17 | 1576  | 1.01  | 0.12 | 12 |
| 1 F43E2.8  | QIAESYLGHEVK         | 46 | 2550  | 1.03  | 0.14 | 14 |
| 7 F43E2.8  | QIAESYLGHEVK         | 43 | 1930  | 1.05  | 0.17 | 16 |
| 1 F43E2.8  | QFTPEEVSAMVLTk       | 14 | 304   | 1.21  | 0.11 | 9  |
| 10 F43E2.8 | QFTPEEVSAMVLTk       | 39 | 616   | 1.24  | 0.16 | 13 |
| 1 F43E2.8  | QIAESYLGHEVK         | 58 | 1639  | 1.27  | 0.13 | 10 |
| 22 F43E2.8 | QIAESYLGHEVK         | 44 | 9767  | 1.40  | 0.11 | 8  |
| 10 F43E2.8 | QIAESYLGHEVK         | 72 | 12418 | 1.40  | 0.10 | 7  |
| 10 F43E2.8 | QIAESYLGHEVK         | 21 | 7810  | 1.79  | 0.12 | 7  |
| 10 F43E2.8 | QIAESYLGHEVK         | 40 | 6392  | 1.91  | 0.11 | 6  |
| 10 F43G9.1 | AVFDAIADGRAK         | 30 | 1897  | 0.34  | 0.24 | 71 |
| 7 F43G9.1  | AVFDAIADGRAK         | 22 | 1392  | 0.38  | 0.17 | 45 |
| 22 F43G9.1 | AVFDAIADGRAK         | 35 | 2315  | 0.38  | 0.19 | 51 |
| 1 F43G9.1  | GAAVFESVHGTAPDIAGQDK | 12 | 1766  | 0.44  | 0.09 | 21 |
| 7 F43G9.1  | AVFDAIADGRAK         | 49 | 3607  | 0.48  | 0.19 | 40 |
| 7 F43G9.1  | AVFDAIADGRAK         | 53 | 3317  | 0.51  | 0.11 | 21 |
| 1 F43G9.1  | AVFDAIADGRAK         | 10 | 816   | 0.52  | 0.17 | 32 |
| 10 F43G9.1 | AVFDAIADGRAK         | 51 | 13824 | 0.54  | 0.13 | 25 |
| 7 F43G9.1  | AVFDAIADGRAK         | 30 | 1750  | 0.55  | 0.24 | 44 |
| 7 F43G9.1  | AVFDAIADGRAK         | 34 | 3553  | 0.59  | 0.20 | 35 |
| 1 F43G9.1  | AVFDAIADGRAK         | 19 | 1740  | 0.60  | 0.29 | 47 |
| 10 F43G9.1 | AVFDAIADGRAK         | 38 | 3308  | 0.63  | 0.13 | 20 |
| 10 F43G9.1 | AVFDAIADGRAK         | 27 | 2859  | 0.66  | 0.10 | 15 |
| 1 F43G9.1  | AVFDAIADGRAK         | 33 | 1983  | 0.69  | 0.13 | 19 |
| 10 F43G9.1 | AVFDAIADGRAK         | 38 | 12889 | 0.69  | 0.18 | 27 |
| 7 F43G9.1  | AVFDAIADGRAK         | 44 | 1913  | 0.69  | 0.12 | 18 |
| 7 F43G9.1  | AVFDAIADGRAK         | 29 | 2278  | 0.71  | 0.23 | 32 |
| 10 F43G9.1 | AVFDAIADGRAK         | 26 | 3267  | 0.73  | 0.13 | 17 |
| 1 F43G9.1  | GAAVFESVHGTAPDIAGQDK | 26 | 3552  | 0.75  | 0.18 | 25 |
| 7 F43G9.1  | AVFDAIADGRAK         | 34 | 7140  | 0.78  | 0.13 | 17 |
| 7 F43G9.1  | GAAVFESVHGTAPDIAGQDK | 60 | 1143  | 0.78  | 0.16 | 20 |
| 22 F43G9.1 | GAAVFESVHGTAPDIAGQDK | 31 | 12615 | 0.81  | 0.17 | 20 |
| 22 F43G9.1 | AVFDAIADGRAK         | 38 | 3128  | 0.85  | 0.12 | 15 |
| 1 F43G9.1  | AVFDAIADGRAK         | 11 | 1166  | 0.88  | 0.16 | 18 |
| 22 F43G9.1 | GAAVFESVHGTAPDIAGQDK | 22 | 3346  | 0.92  | 0.17 | 18 |
| 22 F43G9.1 | AVFDAIADGRAK         | 43 | 3137  | 0.92  | 0.15 | 17 |
| 1 F43G9.1  | AVFDAIADGRAK         | 38 | 3578  | 0.93  | 0.11 | 12 |
| 1 F43G9.1  | GAAVFESVHGTAPDIAGQDK | 13 | 2613  | 0.95  | 0.13 | 14 |
| 22 F43G9.1 | VVTAVHK              | 32 | 4215  | 0.96  | 0.13 | 14 |
| 1 F43G9.1  | AVFDAIADGRAK         | 42 | 3168  | 1.03  | 0.12 | 12 |
| 22 F43G9.1 | AVFDAIADGRAK         | 40 | 2857  | 1.03  | 0.23 | 23 |
| 10 F43G9.1 | AVFDAIADGRAK         | 29 | 5739  | 1.17  | 0.11 | 10 |
| 10 F43G9.1 | GAAVFESVHGTAPDIAGQDK | 38 | 14451 | 1.19  | 0.08 | 7  |
| 7 F43G9.1  | AVFDAIADGRAK         | 29 | 9909  | 1.22  | 0.16 | 13 |
| 10 F43G9.1 | GAAVFESVHGTAPDIAGQDK | 29 | 16057 | 1.23  | 0.06 | 5  |
| 22 F43G9.1 | GHRSLNLAVRK          | 15 | 3805  | 1.26  | 0.14 | 11 |
| 10 F43G9.1 | GAAVFESVHGTAPDIAGQDK | 39 | 14234 | 1.39  | 0.10 | 7  |
| 22 F43G9.1 | VVTAVHK              | 32 | 4718  | 1.51  | 0.16 | 11 |
| 10 F43G9.1 | GAAVFESVHGTAPDIAGQDK | 35 | 4947  | 1.60  | 0.09 | 6  |
| 7 F43G9.1  | GHRSLNLAVRK          | 12 | 4022  | 1.72  | 0.17 | 10 |
| 10 F43G9.1 | GHRSLNLAVRK          | 31 | 9270  | 4.68  | 0.36 | 8  |
| 22 F43G9.5 | LLLVQLPSK            | 37 | 2144  | 0.87  | 0.11 | 13 |
| 22 F43G9.5 | LLLVQLPSK            | 29 | 1627  | 1.10  | 0.18 | 17 |
| 10 F43G9.5 | LLLVQLPSK            | 49 | 1949  | 1.61  | 0.10 | 6  |
| 10 F43G9.5 | LLLVQLPSK            | 15 | 1477  | 1.96  | 0.12 | 6  |
| 7 F44C4.3  | NYNVAYTADK           | 22 | 2481  | 0.63  | 0.13 | 21 |
| 10 F44C4.3 | NYNVAYTADK           | 25 | 2201  | 0.68  | 0.20 | 29 |
| 7 F44C4.3  | NYNVAYTADK           | 12 | 2246  | 0.72  | 0.24 | 33 |
| 1 F44C4.3  | HFGSTAYAVGK          | 15 | 379   | 0.74  | 0.13 | 18 |
| 22 F44C4.3 | DITIEQVK             | 13 | 2428  | 0.76  | 0.15 | 20 |
| 10 F44C4.3 | TQEAITeYVNSK         | 42 | 3210  | 0.88  | 0.11 | 13 |
| 7 F44C4.3  | HFGSTAYAVGK          | 30 | 7345  | 0.91  | 0.07 | 8  |
| 1 F44C4.3  | HFGSTAYAVGK          | 68 | 38003 | 0.91  | 0.07 | 8  |
| 7 F44C4.3  | HFGSTAYAVGK          | 55 | 12016 | 0.93  | 0.10 | 11 |
| 10 F44C4.3 | TQEAITeYVNSK         | 50 | 3171  | 0.95  | 0.21 | 22 |
| 22 F44C4.3 | HFGSTAYAVGK          | 76 | 68488 | 1.09  | 0.07 | 6  |
| 22 F44C4.3 | HFGSTAYAVGK          | 71 | 69133 | 1.17  | 0.08 | 7  |
| 1 F44C4.3  | NYNVAYTADK           | 34 | 2449  | 1.21  | 0.18 | 14 |
| 22 F44C4.3 | HFGSTAYAVGK          | 12 | 2286  | 1.23  | 0.09 | 7  |
| 7 F44C4.3  | HFGSTAYAVGK          | 22 | 2323  | 1.24  | 0.11 | 9  |
| 7 F44C4.3  | HFGSTAYAVGK          | 45 | 10053 | 1.25  | 0.11 | 9  |

|                                        |                |    |       |      |      |     |
|----------------------------------------|----------------|----|-------|------|------|-----|
| 10 F44C4.3                             | HFGSTAYAVGK    | 70 | 51979 | 1.29 | 0.04 | 3   |
| 10 F44C4.3                             | HFGSTAYAVGK    | 57 | 9893  | 1.32 | 0.10 | 7   |
| 10 F44C4.3                             | HFGSTAYAVGK    | 45 | 5062  | 1.33 | 0.12 | 9   |
| 10 F44C4.3                             | NYNVAYTADK     | 83 | 10284 | 1.34 | 0.11 | 8   |
| 22 F44C4.3                             | HFGSTAYAVGK    | 17 | 2017  | 1.36 | 0.07 | 5   |
| 7 F44C4.3                              | HFGSTAYAVGK    | 30 | 8280  | 1.39 | 0.08 | 6   |
| 10 F44C4.3                             | HFGSTAYAVGK    | 18 | 5170  | 1.41 | 0.12 | 9   |
| 10 F44C4.3                             | HFGSTAYAVGK    | 69 | 11978 | 1.46 | 0.10 | 7   |
| 10 F44C4.3                             | NYNVAYTADK     | 85 | 14436 | 1.51 | 0.07 | 5   |
| 7 F44C4.3                              | HFGSTAYAVGK    | 48 | 2717  | 1.54 | 0.11 | 7   |
| 1 F44C4.3                              | HFGSTAYAVGK    | 38 | 2474  | 1.55 | 0.08 | 5   |
| 7 F44C4.3                              | HFGSTAYAVGK    | 40 | 2953  | 1.63 | 0.11 | 7   |
| 10 F44C4.3                             | HFGSTAYAVGK    | 15 | 2763  | 1.73 | 0.13 | 8   |
| 10 F44C4.3                             | HFGSTAYAVGK    | 21 | 3946  | 1.74 | 0.08 | 5   |
| 22 F44C4.3                             | NYNVAYTADK     | 33 | 2758  | 1.79 | 0.11 | 6   |
| 1 F44C4.3                              | HFGSTAYAVGK    | 54 | 3432  | 1.82 | 0.10 | 6   |
| 7 F44C4.3                              | NYNVAYTADK     | 61 | 5326  | 1.84 | 0.11 | 6   |
| 7 F44C4.3                              | NYNVAYTADK     | 74 | 9024  | 1.85 | 0.10 | 6   |
| 7 F44C4.3                              | HFGSTAYAVGK    | 43 | 11509 | 2.08 | 0.06 | 3   |
| 7 F44C4.3                              | HFGSTAYAVGK    | 36 | 11832 | 2.12 | 0.14 | 6   |
| 22 F44C4.3                             | HFGSTAYAVGK    | 54 | 9040  | 2.13 | 0.08 | 4   |
| 1 F44C4.3                              | HFGSTAYAVGK    | 57 | 15998 | 2.15 | 0.07 | 3   |
| 7 F44C4.3                              | HFGSTAYAVGK    | 48 | 9039  | 2.17 | 0.08 | 4   |
| 7 F44C4.3                              | HFGSTAYAVGK    | 53 | 4464  | 2.31 | 0.10 | 5   |
| 1 F44C4.3                              | HFGSTAYAVGK    | 50 | 8743  | 2.40 | 0.08 | 3   |
| 1 F44C4.3                              | HFGSTAYAVGK    | 47 | 5033  | 2.43 | 0.13 | 5   |
| 22 F44C4.3                             | HFGSTAYAVGK    | 47 | 5442  | 2.50 | 0.07 | 3   |
| 7 F44C4.3                              | HFGSTAYAVGK    | 62 | 6308  | 2.69 | 0.06 | 2   |
| 1 F44C4.3                              | HFGSTAYAVGK    | 44 | 3995  | 2.90 | 0.03 | 1   |
| 22 F44C4.3                             | HFGSTAYAVGK    | 63 | 14349 | 2.94 | 0.06 | 2   |
| 22 F44C4.3                             | HFGSTAYAVGK    | 41 | 6989  | 2.98 | 0.11 | 4   |
| 10 F44C4.3                             | HFGSTAYAVGK    | 41 | 5255  | 3.25 | 0.09 | 3   |
| 10 F44C4.3                             | HFGSTAYAVGK    | 33 | 5202  | 3.28 | 0.09 | 3   |
| 10 F44C4.3                             | HFGSTAYAVGK    | 59 | 8528  | 3.35 | 0.19 | 6   |
| 10 F44C4.3                             | HFGSTAYAVGK    | 69 | 20899 | 3.40 | 0.10 | 3   |
| 10 F44C4.3                             | HFGSTAYAVGK    | 42 | 14717 | 3.59 | 0.09 | 2   |
| 7 F44C4.3                              | HFGSTAYAVGK    | 32 | 2263  | 5.25 | 0.28 | 5   |
| 1 F44C4.3                              | HFGSTAYAVGK    | 44 | 5912  | 6.20 | 0.22 | 4   |
| 7 F44C4.3                              | HFGSTAYAVGK    | 41 | 4078  | 7.23 | 0.09 | 1   |
| 22 F44E7.4a;F44E7.4b;F44E7.4c;F44E7.4d | VWEEFPYGPDQLAK | 45 | 1399  | 0.08 | 0.18 | 219 |
| 10 F44E7.4a;F44E7.4b;F44E7.4c;F44E7.4d | HLANRMTNFK     | 13 | 2859  | 0.13 | 0.31 | 234 |
| 10 F44E7.4a;F44E7.4b;F44E7.4c;F44E7.4d | GIEPRDALLQFHK  | 34 | 3643  | 0.15 | 0.10 | 66  |
| 10 F44E7.4a;F44E7.4b;F44E7.4c;F44E7.4d | GIEPRDALLQFHK  | 15 | 2011  | 0.20 | 0.31 | 153 |
| 10 F44E7.4a;F44E7.4b;F44E7.4c;F44E7.4d | HLANRMTNFK     | 13 | 3375  | 0.21 | 0.29 | 139 |
| 10 F44E7.4a;F44E7.4b;F44E7.4c;F44E7.4d | RHDLIVK        | 20 | 1331  | 0.24 | 0.13 | 55  |
| 22 F44E7.4a;F44E7.4b;F44E7.4c;F44E7.4d | GIEPRDALLQFHK  | 32 | 2831  | 0.25 | 0.13 | 53  |
| 22 F44E7.4a;F44E7.4b;F44E7.4c;F44E7.4d | RIDVVPIK       | 31 | 4075  | 0.28 | 0.14 | 51  |
| 10 F44E7.4a;F44E7.4b;F44E7.4c;F44E7.4d | TSHHALHLEK     | 18 | 3123  | 0.30 | 0.12 | 42  |
| 22 F44E7.4a;F44E7.4b;F44E7.4c;F44E7.4d | TSHHALHLEK     | 22 | 3771  | 0.31 | 0.17 | 54  |
| 22 F44E7.4a;F44E7.4b;F44E7.4c;F44E7.4d | GIEPRDALLQFHK  | 18 | 2323  | 0.35 | 0.22 | 63  |
| 10 F44E7.4a;F44E7.4b;F44E7.4c;F44E7.4d | RHDLIVK        | 16 | 864   | 0.38 | 0.15 | 39  |
| 10 F44E7.4a;F44E7.4b;F44E7.4c;F44E7.4d | VWEEFPYGPDQLAK | 23 | 1202  | 0.39 | 0.11 | 29  |
| 22 F44E7.4a;F44E7.4b;F44E7.4c;F44E7.4d | TSHHALHLEK     | 24 | 4918  | 0.42 | 0.17 | 40  |
| 22 F44E7.4a;F44E7.4b;F44E7.4c;F44E7.4d | RHDLIVK        | 48 | 3099  | 0.42 | 0.05 | 11  |
| 10 F44E7.4a;F44E7.4b;F44E7.4c;F44E7.4d | VWEEFPYGPDQLAK | 24 | 1353  | 0.43 | 0.12 | 29  |
| 10 F44E7.4a;F44E7.4b;F44E7.4c;F44E7.4d | LAVFVHGK       | 19 | 10433 | 0.54 | 0.45 | 83  |
| 10 F44E7.4a;F44E7.4b;F44E7.4c;F44E7.4d | TRFDVLFESLK    | 28 | 722   | 0.59 | 0.13 | 22  |
| 10 F44E7.4a;F44E7.4b;F44E7.4c;F44E7.4d | QWVHDELAELSAVK | 57 | 880   | 0.60 | 0.15 | 24  |
| 22 F44E7.4a;F44E7.4b;F44E7.4c;F44E7.4d | RHDLIVK        | 33 | 1471  | 0.62 | 0.19 | 30  |
| 1 F44E7.4a;F44E7.4b;F44E7.4c;F44E7.4d  | LAVFVHGK       | 15 | 2199  | 0.63 | 0.29 | 46  |
| 10 F44E7.4a;F44E7.4b;F44E7.4c;F44E7.4d | LAVFVHGK       | 27 | 16491 | 0.63 | 0.33 | 52  |
| 10 F44E7.4a;F44E7.4b;F44E7.4c;F44E7.4d | TRFDVLFESLK    | 35 | 775   | 0.63 | 0.19 | 31  |
| 1 F44E7.4a;F44E7.4b;F44E7.4c;F44E7.4d  | RHDLIVK        | 15 | 1001  | 0.65 | 0.13 | 19  |
| 22 F44E7.4a;F44E7.4b;F44E7.4c;F44E7.4d | GIEPRDALLQFHK  | 16 | 4943  | 0.67 | 0.13 | 19  |
| 22 F44E7.4a;F44E7.4b;F44E7.4c;F44E7.4d | VWEEFPYGPDQLAK | 24 | 1885  | 0.72 | 0.08 | 11  |
| 10 F44E7.4a;F44E7.4b;F44E7.4c;F44E7.4d | ELMDVLK        | 12 | 827   | 0.72 | 0.13 | 19  |
| 22 F44E7.4a;F44E7.4b;F44E7.4c;F44E7.4d | GIEPRDALLQFHK  | 39 | 3812  | 0.77 | 0.16 | 21  |
| 22 F44E7.4a;F44E7.4b;F44E7.4c;F44E7.4d | VWEEFPYGPDQLAK | 22 | 1164  | 0.77 | 0.10 | 13  |
| 22 F44E7.4a;F44E7.4b;F44E7.4c;F44E7.4d | GIEPRDALLQFHK  | 18 | 4127  | 0.80 | 0.13 | 17  |
| 10 F44E7.4a;F44E7.4b;F44E7.4c;F44E7.4d | TRFDVLFESLK    | 24 | 690   | 0.80 | 0.14 | 18  |
| 10 F44E7.4a;F44E7.4b;F44E7.4c;F44E7.4d | TRFDVLFESLK    | 31 | 784   | 0.81 | 0.17 | 21  |
| 10 F44E7.4a;F44E7.4b;F44E7.4c;F44E7.4d | LAVFVHGK       | 32 | 16880 | 0.84 | 0.19 | 23  |
| 10 F44E7.4a;F44E7.4b;F44E7.4c;F44E7.4d | GIEPRDALLQFHK  | 13 | 4004  | 0.87 | 0.18 | 20  |
| 10 F44E7.4a;F44E7.4b;F44E7.4c;F44E7.4d | RIDVVPIK       | 47 | 12060 | 0.91 | 0.11 | 13  |
| 1 F44E7.4a;F44E7.4b;F44E7.4c;F44E7.4d  | GIEPRDALLQFHK  | 19 | 1226  | 0.93 | 0.14 | 16  |
| 1 F44E7.4a;F44E7.4b;F44E7.4c;F44E7.4d  | GIEPRDALLQFHK  | 10 | 1169  | 0.94 | 0.18 | 19  |
| 10 F44E7.4a;F44E7.4b;F44E7.4c;F44E7.4d | RIDVVPIK       | 37 | 9523  | 0.97 | 0.12 | 12  |
| 10 F44E7.4a;F44E7.4b;F44E7.4c;F44E7.4d | GIEPRDALLQFHK  | 22 | 5777  | 0.97 | 0.11 | 11  |
| 1 F44E7.4a;F44E7.4b;F44E7.4c;F44E7.4d  | GIEPRDALLQFHK  | 30 | 1730  | 0.97 | 0.14 | 15  |
| 1 F44E7.4a;F44E7.4b;F44E7.4c;F44E7.4d  | GIEPRDALLQFHK  | 20 | 2190  | 0.98 | 0.13 | 14  |
| 10 F44E7.4a;F44E7.4b;F44E7.4c;F44E7.4d | GIEPRDALLQFHK  | 23 | 5360  | 1.01 | 0.17 | 17  |
| 22 F44E7.4a;F44E7.4b;F44E7.4c;F44E7.4d | LAVFVHGK       | 17 | 802   | 1.02 | 0.16 | 16  |
| 1 F44E7.4a;F44E7.4b;F44E7.4c;F44E7.4d  | GIEPRDALLQFHK  | 13 | 1201  | 1.02 | 0.08 | 8   |
| 22 F44E7.4a;F44E7.4b;F44E7.4c;F44E7.4d | LAVFVHGK       | 21 | 3875  | 1.04 | 0.26 | 25  |
| 22 F44E7.4a;F44E7.4b;F44E7.4c;F44E7.4d | TRFDVLFESLK    | 29 | 1040  | 1.12 | 0.12 | 11  |
| 1 F44E7.4a;F44E7.4b;F44E7.4c;F44E7.4d  | GIEPRDALLQFHK  | 18 | 1460  | 1.13 | 0.24 | 21  |
| 10 F44E7.4a;F44E7.4b;F44E7.4c;F44E7.4d | GIEPRDALLQFHK  | 16 | 5908  | 1.14 | 0.13 | 12  |
| 22 F44E7.4a;F44E7.4b;F44E7.4c;F44E7.4d | LAVFVHGK       | 25 | 926   | 1.14 | 0.15 | 13  |
| 1 F44E7.4a;F44E7.4b;F44E7.4c;F44E7.4d  | TSHHALHLEK     | 15 | 4611  | 1.16 | 0.27 | 23  |
| 1 F44E7.4a;F44E7.4b;F44E7.4c;F44E7.4d  | LAVFVHGK       | 24 | 901   | 1.21 | 0.27 | 23  |
| 1 F44E7.4a;F44E7.4b;F44E7.4c;F44E7.4d  | GIEPRDALLQFHK  | 27 | 2164  | 1.24 | 0.08 | 7   |
| 22 F44E7.4a;F44E7.4b;F44E7.4c;F44E7.4d | TRFDVLFESLK    | 27 | 888   | 1.24 | 0.08 | 6   |
| 10 F44E7.4a;F44E7.4b;F44E7.4c;F44E7.4d | LAVFVHGK       | 18 | 17217 | 1.25 | 0.19 | 15  |
| 1 F44E7.4a;F44E7.4b;F44E7.4c;F44E7.4d  | RHDLIVK        | 21 | 1572  | 1.27 | 0.29 | 23  |
| 22 F44E7.4a;F44E7.4b;F44E7.4c;F44E7.4d | LAVFVHGK       | 17 | 3386  | 1.38 | 0.21 | 16  |
| 10 F44E7.4a;F44E7.4b;F44E7.4c;F44E7.4d | VWEEFPYGPDQLAK | 22 | 575   | 1.40 | 0.07 | 5   |
| 1 F44E7.4a;F44E7.4b;F44E7.4c;F44E7.4d  | LAVFVHGK       | 11 | 1039  | 1.45 | 0.14 | 9   |
| 10 F44E7.4a;F44E7.4b;F44E7.4c;F44E7.4d | RIDVVPIK       | 33 | 6710  | 1.48 | 0.10 | 7   |
| 1 F44E7.4a;F44E7.4b;F44E7.4c;F44E7.4d  | RHDLIVK        | 40 | 3256  | 1.50 | 0.16 | 11  |
| 10 F44E7.4a;F44E7.4b;F44E7.4c;F44E7.4d | RHDLIVK        | 12 | 2473  | 1.54 | 0.16 | 10  |
| 1 F44E7.4a;F44E7.4b;F44E7.4c;F44E7.4d  | RHDLIVK        | 47 | 3835  | 1.60 | 0.10 | 6   |

|                                        |                |    |       |       |      |     |
|----------------------------------------|----------------|----|-------|-------|------|-----|
| 1 F44E7.4a;F44E7.4b;F44E7.4c;F44E7.4d  | LAVFVHGK       | 24 | 1159  | 1.67  | 0.11 | 7   |
| 1 F44E7.4a;F44E7.4b;F44E7.4c;F44E7.4d  | LAVFVHGK       | 33 | 3301  | 1.68  | 0.18 | 10  |
| 10 F44E7.4a;F44E7.4b;F44E7.4c;F44E7.4d | LAVFVHGK       | 45 | 8906  | 1.68  | 0.08 | 5   |
| 22 F44E7.4a;F44E7.4b;F44E7.4c;F44E7.4d | TSHHALHLPK     | 10 | 8609  | 1.69  | 0.11 | 7   |
| 22 F44E7.4a;F44E7.4b;F44E7.4c;F44E7.4d | LAVFVHGK       | 13 | 675   | 1.72  | 0.08 | 5   |
| 22 F44E7.4a;F44E7.4b;F44E7.4c;F44E7.4d | LAVFVHGK       | 18 | 1066  | 1.73  | 0.17 | 10  |
| 1 F44E7.4a;F44E7.4b;F44E7.4c;F44E7.4d  | TSHHALHLPK     | 11 | 3732  | 1.77  | 0.11 | 6   |
| 22 F44E7.4a;F44E7.4b;F44E7.4c;F44E7.4d | RIDVVPIK       | 49 | 11671 | 1.78  | 0.09 | 5   |
| 1 F44E7.4a;F44E7.4b;F44E7.4c;F44E7.4d  | RHDLVK         | 14 | 1947  | 1.79  | 0.14 | 8   |
| 10 F44E7.4a;F44E7.4b;F44E7.4c;F44E7.4d | RIDVVPIK       | 16 | 4228  | 1.81  | 0.06 | 3   |
| 10 F44E7.4a;F44E7.4b;F44E7.4c;F44E7.4d | LAVFVHGK       | 42 | 1635  | 1.81  | 0.09 | 5   |
| 22 F44E7.4a;F44E7.4b;F44E7.4c;F44E7.4d | LAVFVHGK       | 14 | 1219  | 1.82  | 0.09 | 5   |
| 1 F44E7.4a;F44E7.4b;F44E7.4c;F44E7.4d  | LAVFVHGK       | 21 | 1429  | 1.83  | 0.19 | 10  |
| 10 F44E7.4a;F44E7.4b;F44E7.4c;F44E7.4d | TSHHALHLPK     | 17 | 8110  | 1.87  | 0.14 | 8   |
| 22 F44E7.4a;F44E7.4b;F44E7.4c;F44E7.4d | TSHHALHLPK     | 24 | 7486  | 1.88  | 0.10 | 5   |
| 1 F44E7.4a;F44E7.4b;F44E7.4c;F44E7.4d  | RHDLVK         | 40 | 2872  | 1.90  | 0.09 | 5   |
| 22 F44E7.4a;F44E7.4b;F44E7.4c;F44E7.4d | TSHHALHLPK     | 16 | 7630  | 1.93  | 0.13 | 7   |
| 22 F44E7.4a;F44E7.4b;F44E7.4c;F44E7.4d | RIDVVPIK       | 12 | 6580  | 2.02  | 0.11 | 6   |
| 22 F44E7.4a;F44E7.4b;F44E7.4c;F44E7.4d | RIDVVPIK       | 42 | 9978  | 2.13  | 0.11 | 5   |
| 10 F44E7.4a;F44E7.4b;F44E7.4c;F44E7.4d | LAVFVHGK       | 55 | 10963 | 2.20  | 0.08 | 3   |
| 22 F44E7.4a;F44E7.4b;F44E7.4c;F44E7.4d | RIDVVPIK       | 29 | 7813  | 2.21  | 0.11 | 5   |
| 22 F44E7.4a;F44E7.4b;F44E7.4c;F44E7.4d | RHDLVK         | 22 | 2133  | 2.31  | 0.17 | 7   |
| 22 F44E7.4a;F44E7.4b;F44E7.4c;F44E7.4d | TSHHALHLPK     | 25 | 4891  | 2.51  | 0.10 | 4   |
| 22 F44E7.4a;F44E7.4b;F44E7.4c;F44E7.4d | TSHHALHLPK     | 11 | 5537  | 2.53  | 0.09 | 4   |
| 1 F44E7.4a;F44E7.4b;F44E7.4c;F44E7.4d  | RHDLVK         | 28 | 1163  | 2.63  | 0.15 | 6   |
| 22 F44E7.4a;F44E7.4b;F44E7.4c;F44E7.4d | VWEEFPYGPDLAK  | 40 | 1358  | 2.65  | 0.17 | 6   |
| 10 F44E7.4a;F44E7.4b;F44E7.4c;F44E7.4d | TSHHALHLPK     | 20 | 17522 | 2.67  | 0.13 | 5   |
| 1 F44E7.4a;F44E7.4b;F44E7.4c;F44E7.4d  | LAVFVHGK       | 20 | 1367  | 2.71  | 0.18 | 7   |
| 1 F44E7.4a;F44E7.4b;F44E7.4c;F44E7.4d  | RHDLVK         | 34 | 2271  | 2.77  | 0.10 | 4   |
| 1 F44E7.4a;F44E7.4b;F44E7.4c;F44E7.4d  | LAVFVHGK       | 20 | 1320  | 2.77  | 0.06 | 2   |
| 1 F44E7.4a;F44E7.4b;F44E7.4c;F44E7.4d  | LAVFVHGK       | 23 | 3186  | 2.90  | 0.16 | 6   |
| 1 F44E7.4a;F44E7.4b;F44E7.4c;F44E7.4d  | RHDLVK         | 41 | 4838  | 2.95  | 0.06 | 2   |
| 10 F44E7.4a;F44E7.4b;F44E7.4c;F44E7.4d | GIEPRDALLQFHK  | 25 | 2631  | 2.97  | 0.15 | 5   |
| 22 F44E7.4a;F44E7.4b;F44E7.4c;F44E7.4d | VWEEFPYGPDLAK  | 27 | 1364  | 3.08  | 0.32 | 10  |
| 22 F44E7.4a;F44E7.4b;F44E7.4c;F44E7.4d | TRFDVLFESLK    | 11 | 474   | 3.18  | 0.36 | 11  |
| 1 F44E7.4a;F44E7.4b;F44E7.4c;F44E7.4d  | RHDLVK         | 27 | 2235  | 3.25  | 0.12 | 4   |
| 10 F44E7.4a;F44E7.4b;F44E7.4c;F44E7.4d | TSHHALHLPK     | 22 | 4348  | 3.25  | 0.12 | 4   |
| 22 F44E7.4a;F44E7.4b;F44E7.4c;F44E7.4d | RHDLVK         | 14 | 1321  | 3.71  | 0.16 | 4   |
| 10 F44E7.4a;F44E7.4b;F44E7.4c;F44E7.4d | TSHHALHLPK     | 29 | 5579  | 3.96  | 0.04 | 1   |
| 22 F44E7.4a;F44E7.4b;F44E7.4c;F44E7.4d | RIDVVPIK       | 43 | 12171 | 4.01  | 0.09 | 2   |
| 10 F44E7.4a;F44E7.4b;F44E7.4c;F44E7.4d | HLANRMTNFK     | 21 | 12021 | 4.57  | 0.10 | 2   |
| 22 F44E7.4a;F44E7.4b;F44E7.4c;F44E7.4d | RHDLVK         | 31 | 1921  | 4.62  | 0.23 | 5   |
| 22 F44E7.4a;F44E7.4b;F44E7.4c;F44E7.4d | RIDVVPIK       | 38 | 9790  | 5.00  | 0.11 | 2   |
| 10 F44E7.4a;F44E7.4b;F44E7.4c;F44E7.4d | RIDVVPIK       | 49 | 13379 | 5.17  | 0.11 | 2   |
| 10 F44E7.4a;F44E7.4b;F44E7.4c;F44E7.4d | HLANRMTNFK     | 19 | 12831 | 5.22  | 0.17 | 3   |
| 10 F44E7.4a;F44E7.4b;F44E7.4c;F44E7.4d | RIDVVPIK       | 40 | 9494  | 5.84  | 0.14 | 2   |
| 22 F44E7.4a;F44E7.4b;F44E7.4c;F44E7.4d | LAVFVHGK       | 41 | 4528  | 7.80  | 0.07 | 1   |
| 22 F44E7.4a;F44E7.4b;F44E7.4c;F44E7.4d | LAVFVHGK       | 37 | 7164  | 7.93  | 0.27 | 3   |
| 10 F44E7.4a;F44E7.4b;F44E7.4c;F44E7.4d | LAVFVHGK       | 45 | 2234  | 8.89  | 0.21 | 2   |
| 10 F44E7.4a;F44E7.4b;F44E7.4c;F44E7.4d | LAVFVHGK       | 45 | 3085  | 10.08 | 0.28 | 3   |
| 10 F44E7.4a;F44E7.4b;F44E7.4c;F44E7.4d | RHDLVK         | 36 | 3492  | 15.83 | 0.17 | 1   |
| 7 F44E7.4a;F44E7.4b;F44E7.4d           | GIEPRDALLQFHK  | 21 | 2118  | 0.39  | 0.15 | 39  |
| 7 F44E7.4a;F44E7.4b;F44E7.4d           | LAVFVHGK       | 22 | 1168  | 0.49  | 0.15 | 31  |
| 7 F44E7.4a;F44E7.4b;F44E7.4d           | GIEPRDALLQFHK  | 14 | 1350  | 0.50  | 0.13 | 26  |
| 7 F44E7.4a;F44E7.4b;F44E7.4d           | GIEPRDALLQFHK  | 23 | 1599  | 0.52  | 0.21 | 40  |
| 7 F44E7.4a;F44E7.4b;F44E7.4d           | GIEPRDALLQFHK  | 23 | 4878  | 0.70  | 0.18 | 25  |
| 7 F44E7.4a;F44E7.4b;F44E7.4d           | GIEPRDALLQFHK  | 14 | 3355  | 0.88  | 0.09 | 10  |
| 7 F44E7.4a;F44E7.4b;F44E7.4d           | LAVFVHGK       | 17 | 1533  | 0.96  | 0.16 | 17  |
| 7 F44E7.4a;F44E7.4b;F44E7.4d           | GIEPRDALLQFHK  | 12 | 3495  | 0.97  | 0.14 | 14  |
| 7 F44E7.4a;F44E7.4b;F44E7.4d           | GIEPRDALLQFHK  | 11 | 3897  | 1.09  | 0.15 | 14  |
| 7 F44E7.4a;F44E7.4b;F44E7.4d           | GIEPRDALLQFHK  | 24 | 2245  | 1.15  | 0.15 | 13  |
| 7 F44E7.4a;F44E7.4b;F44E7.4d           | GIEPRDALLQFHK  | 11 | 2494  | 1.16  | 0.12 | 11  |
| 7 F44E7.4a;F44E7.4b;F44E7.4d           | GIEPRDALLQFHK  | 19 | 4802  | 1.20  | 0.17 | 14  |
| 7 F44E7.4a;F44E7.4b;F44E7.4d           | LAVFVHGK       | 21 | 2120  | 1.23  | 0.14 | 11  |
| 7 F44E7.4a;F44E7.4b;F44E7.4d           | LAVFVHGK       | 22 | 1351  | 1.41  | 0.08 | 6   |
| 7 F44E7.4a;F44E7.4b;F44E7.4d           | GIEPRDALLQFHK  | 11 | 2871  | 1.61  | 0.11 | 7   |
| 7 F44E7.4a;F44E7.4b;F44E7.4d           | LAVFVHGK       | 19 | 1594  | 1.63  | 0.09 | 6   |
| 7 F44E7.4a;F44E7.4b;F44E7.4d           | RHDLVK         | 13 | 1477  | 1.77  | 0.11 | 6   |
| 7 F44E7.4a;F44E7.4b;F44E7.4d           | LAVFVHGK       | 13 | 1632  | 1.80  | 0.13 | 7   |
| 7 F44E7.4a;F44E7.4b;F44E7.4d           | LAVFVHGK       | 12 | 773   | 2.18  | 0.19 | 9   |
| 7 F44E7.4a;F44E7.4b;F44E7.4d           | RHDLVK         | 13 | 1385  | 2.18  | 0.15 | 7   |
| 7 F44E7.4a;F44E7.4b;F44E7.4d           | LAVFVHGK       | 18 | 940   | 2.20  | 0.15 | 7   |
| 7 F44E7.4a;F44E7.4b;F44E7.4d           | RHDLVK         | 12 | 633   | 2.45  | 0.12 | 5   |
| 7 F44E7.4a;F44E7.4b;F44E7.4d           | RHDLVK         | 11 | 640   | 2.61  | 0.06 | 2   |
| 7 F44E7.4a;F44E7.4b;F44E7.4d           | RHDLVK         | 30 | 1706  | 2.70  | 0.08 | 3   |
| 1 F44F4.11                             | DVNTAITAIK     | 50 | 2208  | 1.33  | 0.14 | 10  |
| 10 F44F4.11                            | DVNTAITAIK     | 28 | 2537  | 2.39  | 0.24 | 10  |
| 10 F44F4.11                            | DVNTAITAIK     | 28 | 2379  | 3.76  | 0.08 | 2   |
| 10 F44G3.2                             | DTQNQLIADHFLFK | 53 | 4169  | 0.30  | 0.27 | 88  |
| 10 F44G3.2                             | DTQNQLIADHFLFK | 56 | 4490  | 0.37  | 0.23 | 62  |
| 10 F44G3.2                             | IIEDYHGLGPDQK  | 44 | 4636  | 0.39  | 0.45 | 117 |
| 10 F44G3.2                             | AFSEFSDEELK    | 14 | 795   | 0.39  | 0.23 | 60  |
| 10 F44G3.2                             | IIEDYHGLGPDQK  | 57 | 4885  | 0.43  | 0.12 | 27  |
| 22 F44G3.2                             | DTQNQLIADHFLFK | 63 | 6463  | 0.90  | 0.11 | 12  |
| 22 F44G3.2                             | DTQNQLIADHFLFK | 70 | 8269  | 0.96  | 0.12 | 12  |
| 1 F44G3.2                              | DTQNQLIADHFLFK | 24 | 769   | 0.98  | 0.12 | 12  |
| 7 F44G3.2                              | DTQNQLIADHFLFK | 59 | 2573  | 0.99  | 0.10 | 10  |
| 22 F44G3.2                             | DTQNQLIADHFLFK | 62 | 8711  | 1.04  | 0.11 | 10  |
| 22 F44G3.2                             | IIEDYHGLGPDQK  | 40 | 6010  | 1.39  | 0.10 | 7   |
| 22 F44G3.2                             | QHEDVDPVTIK    | 23 | 9213  | 1.56  | 0.04 | 3   |
| 10 F44G3.2                             | AFSEFSDEELK    | 33 | 1167  | 2.02  | 0.31 | 16  |
| 10 F45D11.14;F45D11.15;F45D11.16       | LFAEYDALHEK    | 31 | 3727  | 0.19  | 0.09 | 47  |
| 10 F45D11.14;F45D11.15;F45D11.16       | SQLLESLSQK     | 34 | 9910  | 0.25  | 0.21 | 84  |
| 10 F45D11.14;F45D11.15;F45D11.16       | LFAEYDALHEK    | 38 | 5357  | 0.27  | 0.10 | 35  |
| 10 F45D11.14;F45D11.15;F45D11.16       | EFVQWAVASYAK   | 48 | 2027  | 0.29  | 0.19 | 64  |
| 22 F45D11.14;F45D11.15;F45D11.16       | DFYNNYAHK      | 14 | 2863  | 0.30  | 0.18 | 61  |
| 10 F45D11.14;F45D11.15;F45D11.16       | DFYNNYAHK      | 17 | 6076  | 0.34  | 0.17 | 49  |
| 10 F45D11.14;F45D11.15;F45D11.16       | EFVQWAVASYAK   | 55 | 1600  | 0.36  | 0.15 | 42  |
| 10 F45D11.14;F45D11.15;F45D11.16       | SQLLESLSQK     | 33 | 11321 | 0.37  | 0.15 | 41  |
| 10 F45D11.14;F45D11.15;F45D11.16       | YVERIQEGSFDK   | 49 | 6906  | 0.48  | 0.08 | 18  |
| 10 F45D11.14;F45D11.15;F45D11.16       | SQLLESLSQK     | 47 | 9539  | 0.50  | 0.19 | 39  |

|                                                               |                  |    |       |      |      |      |
|---------------------------------------------------------------|------------------|----|-------|------|------|------|
| 10 F45D11.14;F45D11.15;F45D11.16                              | SQLESLSQK        | 18 | 7017  | 0.56 | 0.10 | 18   |
| 10 F45D11.14;F45D11.15;F45D11.16                              | YVERIQEGGSFDK    | 48 | 6633  | 0.57 | 0.05 | 8    |
| 22 F45D11.14;F45D11.15;F45D11.16                              | DFYNNYAHK        | 11 | 4253  | 0.65 | 0.42 | 65   |
| 22 F45D11.14;F45D11.15;F45D11.16                              | EFVQWAVASYAK     | 57 | 1456  | 0.71 | 0.08 | 11   |
| 10 F45D11.14;F45D11.15;F45D11.16                              | DFYNNYAHK        | 14 | 11507 | 0.76 | 0.08 | 10   |
| 10 F45D11.14;F45D11.15;F45D11.16                              | LFAEYDALHEK      | 48 | 10222 | 0.79 | 0.12 | 15   |
| 22 F45D11.14;F45D11.15;F45D11.16                              | LFAEYDALHEK      | 27 | 1132  | 0.84 | 0.11 | 13   |
| 22 F45D11.14;F45D11.15;F45D11.16                              | MVVQFDELK        | 42 | 2800  | 0.86 | 0.10 | 12   |
| 10 F45D11.14;F45D11.15;F45D11.16                              | LFAEYDALHEK      | 45 | 7335  | 0.93 | 0.09 | 10   |
| 22 F45D11.14;F45D11.15;F45D11.16                              | MVVQFDELK        | 35 | 1897  | 1.01 | 0.13 | 13   |
| 22 F45D11.14;F45D11.15;F45D11.16                              | YVERIQEGGSFDK    | 29 | 3920  | 1.01 | 0.10 | 10   |
| 22 F45D11.14;F45D11.15;F45D11.16                              | LFAEYDALHEK      | 22 | 1328  | 1.04 | 0.19 | 19   |
| 1 F45D11.14;F45D11.15;F45D11.16                               | DFYNNYAHK        | 17 | 4628  | 1.11 | 0.16 | 14   |
| 7 F45D11.14;F45D11.15;F45D11.16                               | LFAEYDALHEK      | 51 | 5319  | 1.12 | 0.12 | 11   |
| 10 F45D11.14;F45D11.15;F45D11.16                              | MVVQFDELK        | 40 | 4632  | 1.15 | 0.13 | 11   |
| 22 F45D11.14;F45D11.15;F45D11.16                              | SQLESLSQK        | 41 | 7297  | 1.15 | 0.14 | 13   |
| 10 F45D11.14;F45D11.15;F45D11.16                              | MVVQFDELK        | 53 | 3038  | 1.16 | 0.12 | 11   |
| 22 F45D11.14;F45D11.15;F45D11.16                              | LES DVTNPLK      | 13 | 2497  | 1.29 | 0.30 | 23   |
| 7 F45D11.14;F45D11.15;F45D11.16                               | DFYNNYAHK        | 17 | 3843  | 1.32 | 0.13 | 10   |
| 7 F45D11.14;F45D11.15;F45D11.16                               | MVVQFDELK        | 36 | 1518  | 1.33 | 0.13 | 10   |
| 7 F45D11.14;F45D11.15;F45D11.16                               | VSMAGDELTSK      | 23 | 1918  | 1.34 | 0.13 | 10   |
| 7 F45D11.14;F45D11.15;F45D11.16                               | LES DVTNPLK      | 37 | 7211  | 1.36 | 0.12 | 9    |
| 22 F45D11.14;F45D11.15;F45D11.16                              | EFVQWAVASYAK     | 48 | 2577  | 1.36 | 0.13 | 10   |
| 22 F45D11.14;F45D11.15;F45D11.16                              | YVERIQEGGSFDK    | 56 | 7917  | 1.39 | 0.09 | 6    |
| 7 F45D11.14;F45D11.15;F45D11.16                               | MVVQFDELK        | 23 | 1276  | 1.41 | 0.14 | 10   |
| 7 F45D11.14;F45D11.15;F45D11.16                               | DFYNNYAHK        | 21 | 3780  | 1.41 | 0.14 | 10   |
| 22 F45D11.14;F45D11.15;F45D11.16                              | EFVQWAVASYAK     | 49 | 1878  | 1.44 | 0.07 | 5    |
| 7 F45D11.14;F45D11.15;F45D11.16                               | VSMAGDELTSK      | 16 | 1632  | 1.44 | 0.10 | 7    |
| 7 F45D11.14;F45D11.15;F45D11.16                               | LFAEYDALHEK      | 31 | 7864  | 1.45 | 0.11 | 7    |
| 10 F45D11.14;F45D11.15;F45D11.16                              | MVVQFDELK        | 51 | 4322  | 1.46 | 0.13 | 9    |
| 7 F45D11.14;F45D11.15;F45D11.16                               | MVVQFDELK        | 43 | 1945  | 1.47 | 0.29 | 20   |
| 22 F45D11.14;F45D11.15;F45D11.16                              | YVERIQEGGSFDK    | 46 | 6782  | 1.47 | 0.10 | 7    |
| 22 F45D11.14;F45D11.15;F45D11.16                              | DFYNNYAHK        | 15 | 14595 | 1.50 | 0.21 | 14   |
| 7 F45D11.14;F45D11.15;F45D11.16                               | SQLESLSQK        | 44 | 4362  | 1.51 | 0.11 | 7    |
| 1 F45D11.14;F45D11.15;F45D11.16                               | MVVQFDELK        | 31 | 1430  | 1.55 | 0.07 | 5    |
| 10 F45D11.14;F45D11.15;F45D11.16                              | MVVQFDELK        | 40 | 4010  | 1.57 | 0.09 | 5    |
| 7 F45D11.14;F45D11.15;F45D11.16                               | MVVQFDELK        | 29 | 1664  | 1.59 | 0.13 | 8    |
| 1 F45D11.14;F45D11.15;F45D11.16                               | MVVQFDELK        | 20 | 1343  | 1.59 | 0.15 | 10   |
| 22 F45D11.14;F45D11.15;F45D11.16                              | DFYNNYAHK        | 13 | 10085 | 1.61 | 0.22 | 14   |
| 1 F45D11.14;F45D11.15;F45D11.16                               | MVVQFDELK        | 30 | 1471  | 1.63 | 0.17 | 11   |
| 1 F45D11.14;F45D11.15;F45D11.16                               | MVVQFDELK        | 44 | 1258  | 1.67 | 0.14 | 8    |
| 7 F45D11.14;F45D11.15;F45D11.16                               | LFAEYDALHEK      | 18 | 6663  | 1.80 | 0.12 | 7    |
| 7 F45D11.14;F45D11.15;F45D11.16                               | YVERIQEGGSFDK    | 16 | 3512  | 1.81 | 0.14 | 8    |
| 1 F45D11.14;F45D11.15;F45D11.16                               | DFYNNYAHK        | 17 | 9972  | 1.89 | 0.18 | 10   |
| 1 F45D11.14;F45D11.15;F45D11.16                               | DFYNNYAHK        | 16 | 5544  | 1.96 | 0.24 | 12   |
| 1 F45D11.14;F45D11.15;F45D11.16                               | SQLESLSQK        | 31 | 5681  | 1.97 | 0.12 | 6    |
| 22 F45D11.14;F45D11.15;F45D11.16                              | MVVQFDELK        | 48 | 3673  | 1.97 | 0.11 | 5    |
| 1 F45D11.14;F45D11.15;F45D11.16                               | MVVQFDELK        | 46 | 2641  | 2.03 | 0.18 | 9    |
| 1 F45D11.14;F45D11.15;F45D11.16                               | MVVQFDELK        | 22 | 1609  | 2.22 | 0.10 | 4    |
| 22 F45D11.14;F45D11.15;F45D11.16                              | LFAEYDALHEK      | 41 | 9900  | 2.26 | 0.05 | 2    |
| 7 F45D11.14;F45D11.15;F45D11.16                               | DFYNNYAHK        | 10 | 4506  | 2.29 | 0.15 | 7    |
| 7 F45D11.14;F45D11.15;F45D11.16                               | YVERIQEGGSFDK    | 47 | 4106  | 2.44 | 0.12 | 5    |
| 7 F45D11.14;F45D11.15;F45D11.16                               | MVVQFDELK        | 29 | 3153  | 2.44 | 0.15 | 6    |
| 22 F45D11.14;F45D11.15;F45D11.16                              | LFAEYDALHEK      | 40 | 8107  | 2.45 | 0.10 | 4    |
| 22 F45D11.14;F45D11.15;F45D11.16                              | SQLESLSQK        | 29 | 8994  | 2.69 | 0.15 | 6    |
| 22 F45D11.14;F45D11.15;F45D11.16                              | HYLNDRPYWPK      | 12 | 36385 | 2.69 | 0.18 | 7    |
| 22 F45D11.14;F45D11.15;F45D11.16                              | SQLESLSQK        | 41 | 8434  | 2.74 | 0.11 | 4    |
| 1 F45D11.14;F45D11.15;F45D11.16                               | HYLNDRPYWPK      | 16 | 13884 | 2.74 | 0.47 | 17   |
| 7 F45D11.14;F45D11.15;F45D11.16                               | LFAEYDALHEK      | 44 | 5539  | 2.75 | 0.17 | 6    |
| 1 F45D11.14;F45D11.15;F45D11.16                               | LFAEYDALHEK      | 41 | 3576  | 2.84 | 0.08 | 3    |
| 7 F45D11.14;F45D11.15;F45D11.16                               | MVVQFDELK        | 23 | 3709  | 2.88 | 0.14 | 5    |
| 7 F45D11.14;F45D11.15;F45D11.16                               | MVVQFDELK        | 46 | 6948  | 2.99 | 0.13 | 4    |
| 7 F45D11.14;F45D11.15;F45D11.16                               | MVVQFDELK        | 61 | 9252  | 3.10 | 0.08 | 3    |
| 1 F45D11.14;F45D11.15;F45D11.16                               | LFAEYDALHEK      | 38 | 4563  | 3.11 | 0.10 | 3    |
| 7 F45D11.14;F45D11.15;F45D11.16                               | DFYNNYAHK        | 34 | 6073  | 3.28 | 0.15 | 4    |
| 7 F45E10.1a;F45E10.1c;F45E10.1g;F45E10.1h;F45E10.1b;F45E10.1f | RSSGCNSIK        | 14 | 1148  | 0.97 | 0.21 | 21   |
| 22 F45E4.2                                                    | MLALIDEPSTGEHAPK | 42 | 2062  | 0.31 | 0.29 | 93   |
| 22 F45E4.2                                                    | VLTEYLAK         | 46 | 2438  | 0.33 | 0.23 | 70   |
| 1 F45E4.2                                                     | ELDNIIANQGK      | 28 | 1126  | 0.53 | 0.13 | 25   |
| 22 F45E4.2                                                    | SFLFHSGK         | 40 | 10949 | 0.56 | 0.27 | 49   |
| 1 F45E4.2                                                     | ELDNIIANQGK      | 38 | 1239  | 0.57 | 0.19 | 33   |
| 7 F45E4.2                                                     | VLTEYLAK         | 52 | 2904  | 0.61 | 0.11 | 18   |
| 7 F45E4.2                                                     | RAEDSLATHQLTVQYK | 19 | 3204  | 0.72 | 0.21 | 29   |
| 1 F45E4.2                                                     | MLALIDEPSTGEHAPK | 50 | 1276  | 0.83 | 0.20 | 24   |
| 1 F45E4.2                                                     | MLALIDEPSTGEHAPK | 32 | 470   | 0.86 | 0.20 | 23   |
| 10 F45E4.2                                                    | RAEDSLATHQLTVQYK | 13 | 6830  | 0.97 | 0.09 | 10   |
| 22 F45E4.2                                                    | NDRGEFVRISEIK    | 17 | 14888 | 0.98 | 0.33 | 33   |
| 10 F45E4.2                                                    | RAEDSLATHQLTVQYK | 11 | 8168  | 1.07 | 0.10 | 9    |
| 10 F45E4.2                                                    | MLALIDEPSTGEHAPK | 15 | 6847  | 1.09 | 0.16 | 15   |
| 10 F45E4.2                                                    | SFLFHSGK         | 12 | 17250 | 1.41 | 0.16 | 11   |
| 1 F45E4.2                                                     | MLALIDEPSTGEHAPK | 58 | 2018  | 1.47 | 0.17 | 11   |
| 1 F45E4.2                                                     | MLALIDEPSTGEHAPK | 40 | 1785  | 1.48 | 0.11 | 7    |
| 22 F45E4.2                                                    | SRIILSIVAAK      | 15 | 700   | 1.50 | 0.26 | 18   |
| 1 F45E4.2                                                     | SFLFHSGK         | 15 | 12530 | 1.53 | 0.13 | 9    |
| 1 F45E4.2                                                     | SFLFHSGK         | 27 | 10633 | 1.57 | 0.11 | 7    |
| 10 F45E4.2                                                    | MLALIDEPSTGEHAPK | 10 | 5949  | 1.64 | 0.26 | 16   |
| 10 F45E4.2                                                    | MLALIDEPSTGEHAPK | 46 | 3621  | 1.72 | 0.11 | 6    |
| 1 F45E4.2                                                     | MLALIDEPSTGEHAPK | 59 | 1878  | 1.83 | 0.22 | 12   |
| 1 F45E4.2                                                     | MLALIDEPSTGEHAPK | 36 | 1952  | 1.84 | 0.11 | 6    |
| 10 F45E4.2                                                    | SFLFHSGK         | 29 | 19398 | 1.87 | 0.12 | 6    |
| 22 F45E4.2                                                    | SRIILSIVAAK      | 12 | 619   | 2.05 | 0.32 | 16   |
| 10 F45E4.2                                                    | SRIILSIVAAK      | 11 | 903   | 3.08 | 0.21 | 7    |
| 22 F45E4.2                                                    | VLTEYLAK         | 31 | 1540  | 3.40 | 0.14 | 4    |
| 22 F45E4.2                                                    | RAEDSLATHQLTVQYK | 29 | 4201  | 3.51 | 0.12 | 3    |
| 22 F45E4.2                                                    | RAEDSLATHQLTVQYK | 22 | 4883  | 3.82 | 0.14 | 4    |
| 22 F45E4.2                                                    | SRIILSIVAAK      | 24 | 909   | 4.18 | 0.11 | 3    |
| 22 F45H10.1                                                   | LVLGDGLNPK       | 38 | 3013  | 0.88 | 0.10 | 11   |
| 22 F45H10.1                                                   | LVLGDGLNPK       | 32 | 2756  | 0.90 | 0.14 | 15   |
| 22 F45H10.1                                                   | IHDQYISK         | 16 | 4339  | 1.49 | 0.13 | 9    |
| 22 F46A9.5                                                    | RTDDIGSWDVEFLK   | 44 | 2256  | 0.18 | 0.39 | 214  |
| 10 F46E10.10a                                                 | ELEEEERDDALK     | 35 | 19486 | 0.04 | 0.39 | 1044 |

|               |                          |     |       |      |      |      |
|---------------|--------------------------|-----|-------|------|------|------|
| 10 F46E10.10a | ELEEEERDDALK             | 36  | 20838 | 0.04 | 0.51 | 1133 |
| 10 F46E10.10a | ELEEEERDDALK             | 54  | 8193  | 0.05 | 0.12 | 252  |
| 7 F46E10.10a  | ELEEEERDDALK             | 40  | 7066  | 0.06 | 0.36 | 614  |
| 10 F46E10.10a | ELEEEERDDALK             | 29  | 9573  | 0.07 | 0.45 | 672  |
| 7 F46E10.10a  | ELEEEERDDALK             | 31  | 6943  | 0.07 | 0.31 | 439  |
| 7 F46E10.10a  | ALAEYAKPTTK              | 42  | 12582 | 0.23 | 0.24 | 104  |
| 7 F46E10.10a  | ALAEYAKPTTK              | 31  | 3113  | 0.27 | 0.40 | 145  |
| 7 F46E10.10a  | ALAEYAKPTTK              | 36  | 6366  | 0.31 | 0.39 | 126  |
| 7 F46E10.10a  | ALAEYAKPTTK              | 30  | 6490  | 0.31 | 0.19 | 62   |
| 7 F46E10.10a  | ALAEYAKPTTK              | 47  | 9546  | 0.32 | 0.32 | 102  |
| 7 F46E10.10a  | ALAEYAKPTTK              | 35  | 5280  | 0.33 | 0.30 | 91   |
| 7 F46E10.10a  | ALAEYAKPTTK              | 43  | 6244  | 0.33 | 0.34 | 101  |
| 10 F46E10.10a | ALAEYAKPTTK              | 31  | 11520 | 0.34 | 0.24 | 72   |
| 10 F46E10.10a | DLLAANVK                 | 58  | 44961 | 0.38 | 0.08 | 20   |
| 10 F46E10.10a | DLLAANVK                 | 25  | 3844  | 0.40 | 0.13 | 33   |
| 7 F46E10.10a  | DLLAANVK                 | 12  | 2914  | 0.40 | 0.17 | 43   |
| 10 F46E10.10a | IVQGLSFDDFAK             | 84  | 16456 | 0.42 | 0.12 | 28   |
| 10 F46E10.10a | IVQGLSFDDFAK             | 76  | 13723 | 0.43 | 0.07 | 16   |
| 10 F46E10.10a | ALAEYAKPTTK              | 49  | 10538 | 0.44 | 0.18 | 40   |
| 10 F46E10.10a | IVQGLSFDDFAK             | 59  | 3071  | 0.47 | 0.14 | 29   |
| 10 F46E10.10a | VIVVGNPANTNAFIAAK        | 74  | 1519  | 0.47 | 0.15 | 32   |
| 10 F46E10.10a | VIVVGNPANTNAFIAAK        | 91  | 1760  | 0.47 | 0.20 | 42   |
| 10 F46E10.10a | VIVVGNPANTNAFIAAK        | 97  | 3074  | 0.47 | 0.15 | 31   |
| 10 F46E10.10a | IVQGLSFDDFAK             | 62  | 1570  | 0.47 | 0.13 | 26   |
| 10 F46E10.10a | VIVVGNPANTNAFIAAK        | 123 | 7166  | 0.49 | 0.12 | 24   |
| 7 F46E10.10a  | ALAEYAKPTTK              | 30  | 6037  | 0.50 | 0.31 | 62   |
| 7 F46E10.10a  | VIVVGNPANTNAFIAAK        | 91  | 2099  | 0.52 | 0.17 | 32   |
| 7 F46E10.10a  | IVQGLSFDDFAK             | 52  | 3950  | 0.53 | 0.10 | 18   |
| 10 F46E10.10a | TGTTIGNVK                | 49  | 21654 | 0.53 | 0.10 | 20   |
| 10 F46E10.10a | ALAEYAKPTTK              | 28  | 11032 | 0.53 | 0.32 | 59   |
| 10 F46E10.10a | VIVVGNPANTNAFIAAK        | 122 | 5721  | 0.54 | 0.16 | 30   |
| 10 F46E10.10a | ALAEYAKPTTK              | 38  | 9619  | 0.54 | 0.29 | 54   |
| 10 F46E10.10a | VIVVGNPANTNAFIAAK        | 109 | 2244  | 0.55 | 0.31 | 57   |
| 7 F46E10.10a  | VIVVGNPANTNAFIAAK        | 116 | 4142  | 0.55 | 0.21 | 38   |
| 10 F46E10.10a | TGTTIGNVK                | 59  | 17612 | 0.55 | 0.20 | 36   |
| 10 F46E10.10a | IVQGLSFDDFAK             | 79  | 7472  | 0.56 | 0.11 | 20   |
| 10 F46E10.10a | IVQGLSFDDFAK             | 62  | 5119  | 0.56 | 0.17 | 30   |
| 10 F46E10.10a | RGGVIEK                  | 43  | 18614 | 0.57 | 0.12 | 22   |
| 7 F46E10.10a  | IVQGLSFDDFAK             | 60  | 2516  | 0.57 | 0.15 | 27   |
| 7 F46E10.10a  | DLLAANVK                 | 61  | 11518 | 0.59 | 0.16 | 27   |
| 10 F46E10.10a | VIVVGNPANTNAFIAAK        | 66  | 1143  | 0.59 | 0.12 | 20   |
| 10 F46E10.10a | RGGVIEK                  | 38  | 10936 | 0.60 | 0.10 | 17   |
| 10 F46E10.10a | RGGVIEK                  | 35  | 15128 | 0.60 | 0.07 | 12   |
| 7 F46E10.10a  | IVQGLSFDDFAK             | 46  | 3295  | 0.64 | 0.11 | 17   |
| 7 F46E10.10a  | ALAEYAKPTTK              | 24  | 2937  | 0.67 | 0.63 | 94   |
| 10 F46E10.10a | RGGVIEK                  | 38  | 25372 | 0.68 | 0.05 | 8    |
| 7 F46E10.10a  | VIVVGNPANTNAFIAAK        | 91  | 1737  | 0.69 | 0.17 | 24   |
| 7 F46E10.10a  | VIVVGNPANTNAFIAAK        | 78  | 2012  | 0.70 | 0.20 | 29   |
| 10 F46E10.10a | LSSAMSAK                 | 15  | 2154  | 0.71 | 0.15 | 21   |
| 10 F46E10.10a | LSSAMSAK                 | 18  | 4104  | 0.71 | 0.18 | 25   |
| 10 F46E10.10a | ALAEYAKPTTK              | 47  | 7229  | 0.72 | 0.33 | 46   |
| 10 F46E10.10a | VIVVGNPANTNAFIAAK        | 55  | 1680  | 0.72 | 0.08 | 12   |
| 10 F46E10.10a | IVQGLSFDDFAK             | 16  | 1882  | 0.72 | 0.22 | 30   |
| 10 F46E10.10a | VIVVGNPANTNAFIAAK        | 103 | 1684  | 0.72 | 0.10 | 14   |
| 10 F46E10.10a | VIVVGNPANTNAFIAAK        | 86  | 1397  | 0.73 | 0.18 | 24   |
| 10 F46E10.10a | VIVVGNPANTNAFIAAK        | 69  | 1345  | 0.76 | 0.29 | 39   |
| 7 F46E10.10a  | IVQGLSFDDFAK             | 54  | 1675  | 0.76 | 0.14 | 19   |
| 10 F46E10.10a | NVIIWGNHSGTQFPDVTHATV NK | 34  | 2312  | 0.77 | 0.14 | 18   |
| 7 F46E10.10a  | RGGVIEK                  | 35  | 6326  | 0.78 | 0.12 | 16   |
| 10 F46E10.10a | VIVVGNPANTNAFIAAK        | 119 | 3257  | 0.78 | 0.12 | 16   |
| 10 F46E10.10a | IVQGLSFDDFAK             | 44  | 1499  | 0.81 | 0.18 | 22   |
| 10 F46E10.10a | DLLAANVK                 | 38  | 10805 | 0.81 | 0.13 | 16   |
| 10 F46E10.10a | VIVVGNPANTNAFIAAK        | 48  | 9380  | 0.83 | 0.41 | 50   |
| 7 F46E10.10a  | TGTTIGNVK                | 52  | 15398 | 0.84 | 0.07 | 8    |
| 10 F46E10.10a | VIVVGNPANTNAFIAAK        | 46  | 11123 | 0.85 | 0.20 | 23   |
| 10 F46E10.10a | IVQGLSFDDFAK             | 35  | 1532  | 0.85 | 0.07 | 8    |
| 7 F46E10.10a  | TGTTIGNVK                | 52  | 14018 | 0.86 | 0.10 | 11   |
| 10 F46E10.10a | IVQGLSFDDFAK             | 22  | 1614  | 0.86 | 0.06 | 7    |
| 10 F46E10.10a | VIVVGNPANTNAFIAAK        | 55  | 1900  | 0.93 | 0.15 | 16   |
| 7 F46E10.10a  | RGGVIEK                  | 19  | 8272  | 0.93 | 0.08 | 9    |
| 7 F46E10.10a  | RGGVIEK                  | 16  | 5099  | 0.93 | 0.06 | 6    |
| 7 F46E10.10a  | RGGVIEK                  | 37  | 5335  | 0.98 | 0.20 | 20   |
| 10 F46E10.10a | VIVVGNPANTNAFIAAK        | 45  | 7010  | 0.99 | 0.14 | 14   |
| 10 F46E10.10a | VIVVGNPANTNAFIAAK        | 38  | 7449  | 1.03 | 0.41 | 40   |
| 10 F46E10.10a | DLLAANVK                 | 35  | 17186 | 1.03 | 0.16 | 15   |
| 10 F46E10.10a | TGTTIGNVK                | 32  | 2598  | 1.05 | 0.11 | 11   |
| 10 F46E10.10a | RGGVIEK                  | 29  | 3824  | 1.12 | 0.11 | 10   |
| 10 F46E10.10a | DLLAANVK                 | 47  | 13907 | 1.13 | 0.09 | 8    |
| 10 F46E10.10a | VIVVGNPANTNAFIAAK        | 81  | 2634  | 1.14 | 0.09 | 8    |
| 7 F46E10.10a  | VIVVGNPANTNAFIAAK        | 37  | 5476  | 1.15 | 0.14 | 12   |
| 10 F46E10.10a | RGGVIEK                  | 21  | 4833  | 1.17 | 0.10 | 9    |
| 7 F46E10.10a  | TGTTIGNVK                | 30  | 3596  | 1.17 | 0.13 | 11   |
| 7 F46E10.10a  | DLLAANVK                 | 28  | 2608  | 1.20 | 0.11 | 9    |
| 10 F46E10.10a | RGGVIEK                  | 22  | 5088  | 1.21 | 0.13 | 11   |
| 7 F46E10.10a  | VIVVGNPANTNAFIAAK        | 34  | 11588 | 1.23 | 0.11 | 9    |
| 7 F46E10.10a  | NVIIWGNHSGTQFPDVTHATV NK | 55  | 5972  | 1.24 | 0.15 | 12   |
| 7 F46E10.10a  | DLLAANVK                 | 25  | 6122  | 1.25 | 0.05 | 4    |
| 7 F46E10.10a  | DLLAANVK                 | 29  | 5546  | 1.30 | 0.07 | 6    |
| 10 F46E10.10a | VIVVGNPANTNAFIAAK        | 50  | 1755  | 1.30 | 0.18 | 14   |
| 10 F46E10.10a | TGTTIGNVK                | 44  | 7803  | 1.32 | 0.13 | 10   |
| 10 F46E10.10a | VIVVGNPANTNAFIAAK        | 104 | 5500  | 1.32 | 0.12 | 9    |
| 10 F46E10.10a | DLLAANVK                 | 13  | 5457  | 1.34 | 0.10 | 8    |
| 10 F46E10.10a | VIVVGNPANTNAFIAAK        | 49  | 6481  | 1.34 | 0.12 | 9    |
| 7 F46E10.10a  | VIVVGNPANTNAFIAAK        | 92  | 2516  | 1.36 | 0.13 | 9    |
| 10 F46E10.10a | RGGVIEK                  | 25  | 5302  | 1.38 | 0.11 | 8    |
| 7 F46E10.10a  | VIVVGNPANTNAFIAAK        | 48  | 9361  | 1.40 | 0.20 | 14   |
| 7 F46E10.10a  | VIVVGNPANTNAFIAAK        | 39  | 15957 | 1.40 | 0.13 | 9    |
| 7 F46E10.10a  | VIVVGNPANTNAFIAAK        | 58  | 9909  | 1.43 | 0.18 | 13   |
| 10 F46E10.10a | NVIIWGNHSGTQFPDVTHATV NK | 76  | 13716 | 1.43 | 0.16 | 11   |
| 7 F46E10.10a  | VIVVGNPANTNAFIAAK        | 100 | 5383  | 1.43 | 0.08 | 6    |
| 7 F46E10.10a  | VIVVGNPANTNAFIAAK        | 36  | 4617  | 1.45 | 0.13 | 9    |

|                          |                              |     |       |      |      |     |
|--------------------------|------------------------------|-----|-------|------|------|-----|
| 10 F46E10.10a            | TGTTIGNVK                    | 37  | 9516  | 1.46 | 0.18 | 12  |
| 7 F46E10.10a             | VIVVGNPANTNAFIAAK            | 73  | 2616  | 1.48 | 0.15 | 10  |
| 10 F46E10.10a            | NVIIWGNHSGTQFPDVTHATVNK      | 59  | 4458  | 1.50 | 0.20 | 13  |
| 7 F46E10.10a             | IVQGLSFDDFAK                 | 77  | 5741  | 1.50 | 0.11 | 7   |
| 10 F46E10.10a            | NVIIWGNHSGTQFPDVTHATVNK      | 30  | 3101  | 1.51 | 0.25 | 16  |
| 7 F46E10.10a             | VIVVGNPANTNAFIAAK            | 129 | 6942  | 1.51 | 0.12 | 8   |
| 7 F46E10.10a             | RGGVIIK                      | 28  | 4075  | 1.54 | 0.08 | 5   |
| 7 F46E10.10a             | IVQGLSFDDFAK                 | 69  | 4052  | 1.55 | 0.09 | 6   |
| 7 F46E10.10a             | RGGVIIK                      | 19  | 4335  | 1.55 | 0.04 | 2   |
| 7 F46E10.10a             | DLLAANVK                     | 20  | 3385  | 1.55 | 0.12 | 7   |
| 7 F46E10.10a             | IVQGLSFDDFAK                 | 42  | 1350  | 1.56 | 0.17 | 11  |
| 10 F46E10.10a            | VIVVGNPANTNAFIAAK            | 60  | 2667  | 1.57 | 0.16 | 10  |
| 7 F46E10.10a             | NVIIWGNHSGTQFPDVTHATVNK      | 19  | 2638  | 1.58 | 0.13 | 9   |
| 10 F46E10.10a            | VIVVGNPANTNAFIAAK            | 23  | 4708  | 1.59 | 0.45 | 28  |
| 7 F46E10.10a             | NVIIWGNHSGTQFPDVTHATVNK      | 65  | 9998  | 1.60 | 0.16 | 10  |
| 7 F46E10.10a             | VIVVGNPANTNAFIAAK            | 122 | 11585 | 1.63 | 0.12 | 7   |
| 7 F46E10.10a             | NVIIWGNHSGTQFPDVTHATVNK      | 72  | 6736  | 1.67 | 0.18 | 11  |
| 10 F46E10.10a            | VIVVGNPANTNAFIAAK            | 100 | 2015  | 1.67 | 0.16 | 10  |
| 10 F46E10.10a            | VIVVGNPANTNAFIAAK            | 122 | 2538  | 1.68 | 0.17 | 10  |
| 10 F46E10.10a            | VIVVGNPANTNAFIAAK            | 93  | 2813  | 1.71 | 0.16 | 9   |
| 10 F46E10.10a            | NVIIWGNHSGTQFPDVTHATVNK      | 57  | 5501  | 1.72 | 0.14 | 8   |
| 10 F46E10.10a            | DLLAANVK                     | 44  | 6388  | 1.73 | 0.07 | 4   |
| 10 F46E10.10a            | VIVVGNPANTNAFIAAK            | 109 | 2204  | 1.74 | 0.11 | 6   |
| 7 F46E10.10a             | IVQGLSFDDFAK                 | 79  | 4410  | 1.88 | 0.14 | 7   |
| 10 F46E10.10a            | VIVVGNPANTNAFIAAK            | 68  | 2149  | 1.96 | 0.15 | 8   |
| 7 F46E10.10a             | TGTTIGNVK                    | 45  | 2319  | 1.97 | 0.18 | 9   |
| 7 F46E10.10a             | NVIIWGNHSGTQFPDVTHATVNK      | 66  | 10596 | 2.07 | 0.13 | 6   |
| 7 F46E10.10a             | VIVVGNPANTNAFIAAK            | 135 | 3670  | 2.25 | 0.15 | 7   |
| 10 F46E10.10a            | VIVVGNPANTNAFIAAK            | 60  | 1488  | 2.42 | 0.20 | 8   |
| 7 F46E10.10a             | LSSAMSAK                     | 12  | 857   | 2.54 | 0.10 | 4   |
| 22 F46E10.10a;F46E10.10b | ELEERDDALK                   | 36  | 12469 | 0.13 | 0.07 | 54  |
| 22 F46E10.10a;F46E10.10b | ELEERDDALK                   | 36  | 14434 | 0.14 | 0.25 | 183 |
| 1 F46E10.10a;F46E10.10b  | RGGVIIK                      | 22  | 2493  | 0.15 | 0.05 | 34  |
| 1 F46E10.10a;F46E10.10b  | RGGVIIK                      | 35  | 2162  | 0.17 | 0.21 | 122 |
| 1 F46E10.10a;F46E10.10b  | DLLAANVK                     | 41  | 3336  | 0.19 | 0.26 | 141 |
| 1 F46E10.10a;F46E10.10b  | RGGVIIK                      | 15  | 1236  | 0.26 | 0.21 | 81  |
| 22 F46E10.10a;F46E10.10b | IVQGLSFDDFAK                 | 71  | 2221  | 0.27 | 0.13 | 48  |
| 1 F46E10.10a;F46E10.10b  | LSSAMSAK                     | 33  | 1258  | 0.28 | 0.36 | 127 |
| 1 F46E10.10a;F46E10.10b  | ALAEYAKPTTK                  | 41  | 2606  | 0.30 | 0.21 | 72  |
| 1 F46E10.10a;F46E10.10b  | TGTTIGNVK                    | 38  | 1094  | 0.31 | 0.36 | 115 |
| 1 F46E10.10a;F46E10.10b  | TGTTIGNVK                    | 22  | 856   | 0.37 | 0.32 | 86  |
| 1 F46E10.10a;F46E10.10b  | LSSAMSAK                     | 32  | 982   | 0.37 | 0.28 | 75  |
| 22 F46E10.10a;F46E10.10b | IVQGLSFDDFAK                 | 59  | 6489  | 0.39 | 0.15 | 38  |
| 22 F46E10.10a;F46E10.10b | DLLAANVK                     | 36  | 7977  | 0.42 | 0.08 | 19  |
| 22 F46E10.10a;F46E10.10b | IVQGLSFDDFAK                 | 46  | 4050  | 0.46 | 0.22 | 47  |
| 22 F46E10.10a;F46E10.10b | VIVVGNPANTNAFIAAK            | 85  | 2064  | 0.48 | 0.19 | 40  |
| 22 F46E10.10a;F46E10.10b | VIVVGNPANTNAFIAAK            | 92  | 3873  | 0.49 | 0.21 | 44  |
| 22 F46E10.10a;F46E10.10b | IVQGLSFDDFAK                 | 24  | 736   | 0.49 | 0.19 | 38  |
| 22 F46E10.10a;F46E10.10b | IVQGLSFDDFAK                 | 77  | 4788  | 0.49 | 0.15 | 31  |
| 22 F46E10.10a;F46E10.10b | VIVVGNPANTNAFIAAK            | 90  | 1773  | 0.54 | 0.19 | 35  |
| 22 F46E10.10a;F46E10.10b | VIVVGNPANTNAFIAAK            | 87  | 2732  | 0.55 | 0.18 | 33  |
| 22 F46E10.10a;F46E10.10b | VIVVGNPANTNAFIAAK            | 97  | 1769  | 0.56 | 0.30 | 55  |
| 22 F46E10.10a;F46E10.10b | IVQGLSFDDFAK                 | 34  | 1483  | 0.56 | 0.18 | 31  |
| 22 F46E10.10a;F46E10.10b | ALAEYAKPTTK                  | 37  | 10176 | 0.64 | 0.13 | 20  |
| 22 F46E10.10a;F46E10.10b | ALAEYAKPTTK                  | 38  | 13370 | 0.66 | 0.36 | 54  |
| 22 F46E10.10a;F46E10.10b | VIVVGNPANTNAFIAAK            | 70  | 751   | 0.71 | 0.09 | 13  |
| 22 F46E10.10a;F46E10.10b | VIVVGNPANTNAFIAAK            | 75  | 3447  | 0.71 | 0.11 | 16  |
| 22 F46E10.10a;F46E10.10b | IVQGLSFDDFAK                 | 32  | 1188  | 0.71 | 0.11 | 15  |
| 22 F46E10.10a;F46E10.10b | NVIIWGNHSGTQFPDVTHATVNK      | 44  | 7752  | 0.72 | 0.16 | 22  |
| 22 F46E10.10a;F46E10.10b | ALAEYAKPTTK                  | 29  | 10659 | 0.73 | 0.23 | 31  |
| 22 F46E10.10a;F46E10.10b | DLLAANVK                     | 30  | 13605 | 0.76 | 0.12 | 15  |
| 22 F46E10.10a;F46E10.10b | NGTETDAYAAVGDNAFLQGPFIA TVQK | 42  | 3155  | 0.77 | 0.11 | 15  |
| 22 F46E10.10a;F46E10.10b | DLLAANVK                     | 28  | 1210  | 0.77 | 0.23 | 30  |
| 22 F46E10.10a;F46E10.10b | DLLAANVK                     | 50  | 39817 | 0.78 | 0.09 | 11  |
| 22 F46E10.10a;F46E10.10b | DLLAANVK                     | 46  | 5156  | 0.78 | 0.11 | 15  |
| 1 F46E10.10a;F46E10.10b  | IVQGLSFDDFAK                 | 15  | 633   | 0.80 | 0.31 | 39  |
| 1 F46E10.10a;F46E10.10b  | VIVVGNPANTNAFIAAK            | 66  | 880   | 0.81 | 0.18 | 22  |
| 22 F46E10.10a;F46E10.10b | NVIIWGNHSGTQFPDVTHATVNK      | 51  | 4666  | 0.82 | 0.23 | 28  |
| 1 F46E10.10a;F46E10.10b  | VIVVGNPANTNAFIAAK            | 84  | 1496  | 0.85 | 0.12 | 14  |
| 1 F46E10.10a;F46E10.10b  | LSSAMSAK                     | 57  | 1950  | 0.86 | 0.27 | 31  |
| 1 F46E10.10a;F46E10.10b  | IVQGLSFDDFAK                 | 75  | 5991  | 0.89 | 0.10 | 11  |
| 22 F46E10.10a;F46E10.10b | NGTETDAYAAVGDNAFLQGPFIA TVQK | 69  | 4054  | 0.89 | 0.23 | 25  |
| 22 F46E10.10a;F46E10.10b | VIVVGNPANTNAFIAAK            | 50  | 867   | 0.91 | 0.17 | 19  |
| 22 F46E10.10a;F46E10.10b | VIVVGNPANTNAFIAAK            | 139 | 3933  | 0.95 | 0.19 | 20  |
| 22 F46E10.10a;F46E10.10b | NGTETDAYAAVGDNAFLQGPFIA TVQK | 57  | 3175  | 0.95 | 0.13 | 14  |
| 22 F46E10.10a;F46E10.10b | VIVVGNPANTNAFIAAK            | 30  | 5600  | 0.96 | 0.20 | 21  |
| 1 F46E10.10a;F46E10.10b  | VIVVGNPANTNAFIAAK            | 95  | 931   | 0.96 | 0.20 | 21  |
| 1 F46E10.10a;F46E10.10b  | VIVVGNPANTNAFIAAK            | 65  | 636   | 0.96 | 0.15 | 16  |
| 22 F46E10.10a;F46E10.10b | TGTTIGNVK                    | 16  | 9186  | 0.97 | 0.20 | 21  |
| 1 F46E10.10a;F46E10.10b  | DLLAANVK                     | 43  | 14864 | 0.98 | 0.07 | 7   |
| 1 F46E10.10a;F46E10.10b  | LSSAMSAK                     | 50  | 793   | 0.99 | 0.56 | 56  |
| 1 F46E10.10a;F46E10.10b  | DLLAANVK                     | 37  | 11129 | 1.01 | 0.07 | 7   |
| 1 F46E10.10a;F46E10.10b  | VIVVGNPANTNAFIAAK            | 39  | 581   | 1.03 | 0.14 | 13  |
| 1 F46E10.10a;F46E10.10b  | IVQGLSFDDFAK                 | 76  | 5670  | 1.04 | 0.13 | 12  |
| 22 F46E10.10a;F46E10.10b | VIVVGNPANTNAFIAAK            | 105 | 3351  | 1.08 | 0.20 | 18  |
| 22 F46E10.10a;F46E10.10b | RGGVIIK                      | 38  | 70574 | 1.10 | 0.08 | 7   |
| 22 F46E10.10a;F46E10.10b | LSSAMSAK                     | 15  | 1602  | 1.10 | 0.18 | 16  |
| 22 F46E10.10a;F46E10.10b | NGTETDAYAAVGDNAFLQGPFIA TVQK | 59  | 2786  | 1.10 | 0.22 | 20  |
| 1 F46E10.10a;F46E10.10b  | VIVVGNPANTNAFIAAK            | 50  | 663   | 1.17 | 0.10 | 9   |
| 22 F46E10.10a;F46E10.10b | NVIIWGNHSGTQFPDVTHATVNK      | 69  | 31910 | 1.17 | 0.24 | 20  |
| 22 F46E10.10a;F46E10.10b | NVIIWGNHSGTQFPDVTHATVNK      | 53  | 27836 | 1.18 | 0.17 | 15  |
| 22 F46E10.10a;F46E10.10b | RGGVIIK                      | 39  | 71062 | 1.19 | 0.05 | 4   |
| 1 F46E10.10a;F46E10.10b  | VIVVGNPANTNAFIAAK            | 43  | 613   | 1.24 | 0.25 | 20  |
| 1 F46E10.10a;F46E10.10b  | DLLAANVK                     | 31  | 11217 | 1.26 | 0.07 | 6   |
| 1 F46E10.10a;F46E10.10b  | DLLAANVK                     | 31  | 5640  | 1.33 | 0.09 | 7   |
| 22 F46E10.10a;F46E10.10b | RGGVIIK                      | 39  | 4629  | 1.37 | 0.11 | 8   |
| 1 F46E10.10a;F46E10.10b  | VIVVGNPANTNAFIAAK            | 81  | 1445  | 1.38 | 0.20 | 14  |
| 22 F46E10.10a;F46E10.10b | VIVVGNPANTNAFIAAK            | 19  | 6156  | 1.39 | 0.12 | 9   |
| 22 F46E10.10a;F46E10.10b | RGGVIIK                      | 38  | 5281  | 1.40 | 0.09 | 7   |
| 1 F46E10.10a;F46E10.10b  | VIVVGNPANTNAFIAAK            | 67  | 1333  | 1.40 | 0.24 | 17  |
| 22 F46E10.10a;F46E10.10b | VIVVGNPANTNAFIAAK            | 57  | 10219 | 1.45 | 0.18 | 12  |

|                          |                           |     |        |      |      |     |
|--------------------------|---------------------------|-----|--------|------|------|-----|
| 22 F46E10.10a;F46E10.10b | TGTTIGNVK                 | 23  | 10417  | 1.46 | 0.19 | 13  |
| 1 F46E10.10a;F46E10.10b  | DLLAANVK                  | 47  | 9480   | 1.52 | 0.09 | 6   |
| 22 F46E10.10a;F46E10.10b | VIVVGNPANTNAFIAAK         | 74  | 4076   | 1.56 | 0.14 | 9   |
| 22 F46E10.10a;F46E10.10b | VIVVGNPANTNAFIAAK         | 107 | 8057   | 1.60 | 0.13 | 8   |
| 22 F46E10.10a;F46E10.10b | NVIIWGNHSGTQFPDVTTHATV NK | 67  | 21327  | 1.62 | 0.12 | 7   |
| 22 F46E10.10a;F46E10.10b | NVIIWGNHSGTQFPDVTTHATV NK | 47  | 10470  | 1.66 | 0.11 | 7   |
| 22 F46E10.10a;F46E10.10b | VIVVGNPANTNAFIAAK         | 23  | 9055   | 1.67 | 0.07 | 4   |
| 1 F46E10.10a;F46E10.10b  | VIVVGNPANTNAFIAAK         | 127 | 3125   | 1.72 | 0.16 | 10  |
| 22 F46E10.10a;F46E10.10b | VIVVGNPANTNAFIAAK         | 108 | 4628   | 1.75 | 0.13 | 7   |
| 1 F46E10.10a;F46E10.10b  | DLLAANVK                  | 24  | 5537   | 1.78 | 0.13 | 7   |
| 22 F46E10.10a;F46E10.10b | VIVVGNPANTNAFIAAK         | 37  | 7805   | 1.80 | 0.14 | 8   |
| 22 F46E10.10a;F46E10.10b | VIVVGNPANTNAFIAAK         | 29  | 5150   | 1.80 | 0.27 | 15  |
| 22 F46E10.10a;F46E10.10b | RGGVIEK                   | 34  | 8191   | 1.81 | 0.10 | 5   |
| 22 F46E10.10a;F46E10.10b | IVQGLSFDDFAK              | 47  | 2493   | 1.85 | 0.11 | 6   |
| 1 F46E10.10a;F46E10.10b  | VIVVGNPANTNAFIAAK         | 94  | 2615   | 1.92 | 0.16 | 8   |
| 1 F46E10.10a;F46E10.10b  | VIVVGNPANTNAFIAAK         | 59  | 1340   | 2.09 | 0.18 | 9   |
| 22 F46E10.10a;F46E10.10b | VIVVGNPANTNAFIAAK         | 88  | 3620   | 2.09 | 0.11 | 5   |
| 1 F46E10.10a;F46E10.10b  | VIVVGNPANTNAFIAAK         | 78  | 1455   | 2.17 | 0.17 | 8   |
| 22 F46E10.10a;F46E10.10b | RGGVIEK                   | 15  | 4581   | 2.31 | 0.07 | 3   |
| 22 F46E10.10a;F46E10.10b | TGTTIGNVK                 | 25  | 1489   | 2.52 | 0.22 | 9   |
| 1 F46E10.10a;F46E10.10b  | ALAEYAKPTTK               | 42  | 5859   | 4.40 | 0.52 | 12  |
| 1 F46F11.2               | IITEEAGLSK                | 25  | 920    | 0.57 | 0.14 | 24  |
| 1 F46F11.2               | TAITTLQ GK                | 12  | 1913   | 0.59 | 0.12 | 21  |
| 1 F46F11.2               | TAITTLQ GK                | 45  | 6080   | 0.68 | 0.19 | 28  |
| 1 F46F11.2               | IITEEAGLSK                | 44  | 887    | 0.71 | 0.19 | 27  |
| 10 F46F11.2              | DIFVHQT AIAK              | 36  | 21246  | 0.76 | 0.14 | 19  |
| 1 F46F11.2               | TAITTLQ GK                | 33  | 5412   | 0.97 | 0.13 | 13  |
| 10 F46F11.2              | DIFVHQT AIAK              | 40  | 16999  | 0.99 | 0.10 | 10  |
| 10 F46F11.2              | DIFVHQT AIAK              | 31  | 10289  | 1.01 | 0.11 | 11  |
| 10 F46F11.2              | DIFVHQT AIAK              | 21  | 9738   | 1.05 | 0.15 | 14  |
| 7 F46F11.2               | DIFVHQT AIAK              | 39  | 9583   | 1.18 | 0.08 | 7   |
| 22 F46F11.2              | DIFVHQT AIAK              | 27  | 11245  | 1.20 | 0.13 | 11  |
| 7 F46F11.2               | IITEEAGLSK                | 16  | 1712   | 1.22 | 0.18 | 15  |
| 22 F46F11.2              | DIFVHQT AIAK              | 17  | 5380   | 1.23 | 0.09 | 7   |
| 1 F46F11.2               | DIFVHQT AIAK              | 19  | 7147   | 1.27 | 0.11 | 8   |
| 22 F46F11.2              | DIFVHQT AIAK              | 18  | 5720   | 1.31 | 0.12 | 9   |
| 7 F46F11.2               | DIFVHQT AIAK              | 20  | 11322  | 1.33 | 0.14 | 11  |
| 1 F46F11.2               | TAITTLQ GK                | 26  | 4846   | 1.35 | 0.08 | 6   |
| 22 F46F11.2              | IITEEAGLSK                | 56  | 5406   | 1.41 | 0.09 | 6   |
| 1 F46F11.2               | DIFVHQT AIAK              | 15  | 5273   | 1.45 | 0.08 | 6   |
| 7 F46F11.2               | DIFVHQT AIAK              | 13  | 4102   | 1.45 | 0.12 | 9   |
| 10 F46F11.2              | DIFVHQT AIAK              | 38  | 8374   | 1.47 | 0.12 | 8   |
| 22 F46F11.2              | DIFVHQT AIAK              | 33  | 8796   | 1.50 | 0.10 | 7   |
| 1 F46F11.2               | TAITTLQ GK                | 40  | 3207   | 1.66 | 0.10 | 6   |
| 1 F46F11.2               | DIFVHQT AIAK              | 42  | 7915   | 1.67 | 0.12 | 7   |
| 10 F46F11.2              | TAITTLQ GK                | 39  | 5555   | 1.76 | 0.13 | 7   |
| 10 F46F11.2              | DIFVHQT AIAK              | 32  | 3270   | 1.78 | 0.10 | 5   |
| 1 F46F11.2               | TAITTLQ GK                | 49  | 4860   | 1.86 | 0.11 | 6   |
| 1 F46F11.2               | IITEEAGLSK                | 54  | 2764   | 2.06 | 0.12 | 6   |
| 10 F46F11.2              | TAITTLQ GK                | 18  | 3783   | 2.40 | 0.08 | 3   |
| 7 F46F11.2               | DIFVHQT AIAK              | 17  | 6247   | 3.01 | 0.13 | 4   |
| 10 F46F11.2              | DIFVHQT AIAK              | 11  | 5306   | 6.26 | 0.09 | 1   |
| 10 F46H5.3b              | EVVDQLK                   | 51  | 184267 | 0.04 | 0.06 | 136 |
| 10 F46H5.3b              | EVVDQLK                   | 53  | 232845 | 0.07 | 0.21 | 317 |
| 7 F46H5.3b               | EVVDQLK                   | 42  | 93603  | 0.07 | 0.12 | 162 |
| 7 F46H5.3b               | EVVDQLK                   | 43  | 216239 | 0.08 | 0.16 | 200 |
| 10 F46H5.3b              | EIQDQLIK                  | 54  | 214868 | 0.14 | 0.14 | 97  |
| 10 F46H5.3b              | EIQDQLIK                  | 50  | 288708 | 0.16 | 0.14 | 83  |
| 10 F46H5.3b              | QPNTDLGEGK                | 65  | 77976  | 0.20 | 0.42 | 207 |
| 10 F46H5.3b              | EVVDQLK                   | 24  | 11632  | 0.22 | 0.39 | 179 |
| 7 F46H5.3b               | EIQDQLIK                  | 31  | 18216  | 0.23 | 0.11 | 50  |
| 22 F46H5.3b              | IEEGYAK                   | 17  | 5603   | 0.24 | 0.16 | 66  |
| 7 F46H5.3b               | QPNTDLGEGK                | 17  | 12929  | 0.26 | 0.37 | 143 |
| 22 F46H5.3b              | IEEGYAK                   | 18  | 16978  | 0.26 | 0.09 | 33  |
| 10 F46H5.3b              | EVVDQLK                   | 34  | 23979  | 0.27 | 0.35 | 127 |
| 22 F46H5.3b              | EIQDQLIK                  | 22  | 2557   | 0.30 | 0.18 | 62  |
| 10 F46H5.3b              | AIFDNITDP ELAGK           | 95  | 70062  | 0.30 | 0.10 | 32  |
| 22 F46H5.3b              | LQAAPECHSLLK              | 37  | 35204  | 0.31 | 0.15 | 47  |
| 10 F46H5.3b              | YFPLDGMTK                 | 33  | 35395  | 0.31 | 0.08 | 27  |
| 7 F46H5.3b               | EIQDQLIK                  | 23  | 9140   | 0.31 | 0.15 | 47  |
| 7 F46H5.3b               | EIQDQLIK                  | 62  | 199768 | 0.31 | 0.07 | 24  |
| 7 F46H5.3b               | EIQDQLIK                  | 44  | 225932 | 0.32 | 0.09 | 27  |
| 10 F46H5.3b              | QPNTDLGEGK                | 44  | 16768  | 0.32 | 0.27 | 83  |
| 10 F46H5.3b              | ARLGLTEFEAVK              | 62  | 197889 | 0.33 | 0.16 | 49  |
| 10 F46H5.3b              | YFPLDGMTK                 | 62  | 172617 | 0.33 | 0.09 | 26  |
| 7 F46H5.3b               | AIFDNITDP ELAGK           | 78  | 2922   | 0.34 | 0.15 | 46  |
| 1 F46H5.3b               | QMYDGIAHLIALEK            | 39  | 818    | 0.34 | 0.13 | 37  |
| 22 F46H5.3b              | AIFDNITDP ELAGK           | 45  | 1960   | 0.35 | 0.18 | 52  |
| 10 F46H5.3b              | ARLGLTEFEAVK              | 44  | 13742  | 0.35 | 0.13 | 37  |
| 10 F46H5.3b              | QMYDGIAHLIALEK            | 98  | 4709   | 0.36 | 0.17 | 47  |
| 7 F46H5.3b               | EIQDQLIK                  | 26  | 1690   | 0.36 | 0.21 | 58  |
| 10 F46H5.3b              | LQAAPECHSLLK              | 49  | 8904   | 0.36 | 0.25 | 68  |
| 10 F46H5.3b              | EIQDQLIK                  | 14  | 4159   | 0.36 | 0.16 | 43  |
| 22 F46H5.3b              | LQAAPECHSLLK              | 36  | 50928  | 0.37 | 0.17 | 46  |
| 7 F46H5.3b               | AIFDNITDP ELAGK           | 35  | 2649   | 0.37 | 0.18 | 48  |
| 22 F46H5.3b              | EVVDQLK                   | 31  | 11684  | 0.37 | 0.16 | 42  |
| 10 F46H5.3b              | LQAAPECHSLLK              | 35  | 4689   | 0.37 | 0.18 | 49  |
| 10 F46H5.3b              | EIQDQLIK                  | 33  | 16397  | 0.37 | 0.14 | 37  |
| 10 F46H5.3b              | YFPLDGMTK                 | 27  | 19698  | 0.38 | 0.19 | 50  |
| 10 F46H5.3b              | AIFDNITDP ELAGK           | 120 | 96365  | 0.38 | 0.23 | 59  |
| 7 F46H5.3b               | EIQDQLIK                  | 16  | 1717   | 0.39 | 0.17 | 44  |
| 7 F46H5.3b               | QPNTDLGEGK                | 25  | 9281   | 0.39 | 0.21 | 53  |
| 1 F46H5.3b               | EIQDQLIK                  | 15  | 856    | 0.39 | 0.12 | 31  |
| 7 F46H5.3b               | EIQDQLIK                  | 24  | 7651   | 0.40 | 0.21 | 54  |
| 10 F46H5.3b              | ARLGLTEFEAVK              | 60  | 242069 | 0.40 | 0.13 | 33  |
| 10 F46H5.3b              | EIQDQLIK                  | 16  | 3979   | 0.40 | 0.18 | 44  |
| 10 F46H5.3b              | QMYDGIAHLIALEK            | 74  | 3280   | 0.40 | 0.18 | 46  |
| 10 F46H5.3b              | AIFDNITDP ELAGK           | 41  | 4559   | 0.40 | 0.07 | 17  |
| 7 F46H5.3b               | ARLGLTEFEAVK              | 56  | 2355   | 0.41 | 0.24 | 58  |
| 10 F46H5.3b              | EIQDQLIK                  | 24  | 6582   | 0.41 | 0.28 | 70  |
| 10 F46H5.3b              | DHFLFK                    | 23  | 2335   | 0.41 | 0.38 | 94  |

|             |                         |     |        |      |      |     |
|-------------|-------------------------|-----|--------|------|------|-----|
| 22 F46H5.3b | AIFDNITDPELAGK          | 56  | 4106   | 0.41 | 0.15 | 38  |
| 10 F46H5.3b | AIFDNITDPELAGK          | 81  | 2452   | 0.41 | 0.15 | 36  |
| 10 F46H5.3b | EVVDQLK                 | 40  | 20548  | 0.42 | 0.78 | 185 |
| 10 F46H5.3b | QMYDGIAHLIALEK          | 33  | 2748   | 0.42 | 0.29 | 68  |
| 10 F46H5.3b | ARLGLTEFEAVK            | 41  | 7011   | 0.42 | 0.18 | 42  |
| 22 F46H5.3b | EVVDQLK                 | 43  | 21206  | 0.42 | 0.16 | 38  |
| 7 F46H5.3b  | LQIRGIHGEHSESEGGVYDISNK | 22  | 15655  | 0.42 | 0.14 | 34  |
| 7 F46H5.3b  | ISAKPDFK                | 11  | 9040   | 0.43 | 0.21 | 49  |
| 10 F46H5.3b | LQIRGIHGEHSESEGGVYDISNK | 27  | 318725 | 0.43 | 0.09 | 22  |
| 7 F46H5.3b  | EIQDQLIK                | 14  | 2451   | 0.43 | 0.14 | 32  |
| 7 F46H5.3b  | ARLGLTEFEAVK            | 40  | 2881   | 0.43 | 0.08 | 18  |
| 22 F46H5.3b | AIFDNITDPELAGK          | 101 | 56865  | 0.43 | 0.11 | 25  |
| 10 F46H5.3b | YFPLDGMTK               | 26  | 8306   | 0.43 | 0.11 | 25  |
| 22 F46H5.3b | DHFLFK                  | 16  | 31412  | 0.44 | 0.16 | 36  |
| 7 F46H5.3b  | ARLGLTEFEAVK            | 22  | 4926   | 0.44 | 0.12 | 27  |
| 7 F46H5.3b  | AIFDNITDPELAGK          | 57  | 3126   | 0.44 | 0.18 | 40  |
| 22 F46H5.3b | EVVDQLK                 | 62  | 326934 | 0.44 | 0.07 | 16  |
| 10 F46H5.3b | ARLGLTEFEAVK            | 48  | 10087  | 0.45 | 0.15 | 34  |
| 22 F46H5.3b | LQIRGIHGEHSESEGGVYDISNK | 10  | 3672   | 0.45 | 0.24 | 54  |
| 10 F46H5.3b | DHFLFK                  | 25  | 9431   | 0.45 | 0.12 | 27  |
| 10 F46H5.3b | ARLGLTEFEAVK            | 27  | 1665   | 0.45 | 0.20 | 44  |
| 10 F46H5.3b | EIQDQLIK                | 12  | 3696   | 0.45 | 0.12 | 27  |
| 1 F46H5.3b  | DHFLFK                  | 43  | 28841  | 0.45 | 0.15 | 34  |
| 22 F46H5.3b | LQIRGIHGEHSESEGGVYDISNK | 11  | 2389   | 0.46 | 0.17 | 36  |
| 10 F46H5.3b | AIFDNITDPELAGK          | 25  | 3015   | 0.46 | 0.23 | 49  |
| 10 F46H5.3b | DHFLFK                  | 17  | 5798   | 0.46 | 0.21 | 45  |
| 22 F46H5.3b | EIQDQLIK                | 31  | 2622   | 0.47 | 0.15 | 32  |
| 7 F46H5.3b  | LQAAPECHSLLK            | 36  | 16208  | 0.47 | 0.18 | 39  |
| 10 F46H5.3b | IEEGYAK                 | 17  | 9274   | 0.47 | 0.50 | 106 |
| 10 F46H5.3b | DHFLFK                  | 26  | 663120 | 0.47 | 0.13 | 27  |
| 22 F46H5.3b | AIFDNITDPELAGK          | 107 | 72313  | 0.47 | 0.07 | 15  |
| 10 F46H5.3b | LQIRGIHGEHSESEGGVYDISNK | 49  | 12526  | 0.48 | 0.33 | 70  |
| 10 F46H5.3b | DHFLFK                  | 16  | 1406   | 0.48 | 0.18 | 37  |
| 10 F46H5.3b | EIQDQLIK                | 21  | 12761  | 0.48 | 0.15 | 32  |
| 22 F46H5.3b | LQIRGIHGEHSESEGGVYDISNK | 14  | 7319   | 0.48 | 0.05 | 10  |
| 22 F46H5.3b | EVVDQLK                 | 63  | 328416 | 0.48 | 0.03 | 6   |
| 1 F46H5.3b  | EIQDQLIK                | 24  | 3003   | 0.48 | 0.10 | 20  |
| 22 F46H5.3b | DHFLFK                  | 16  | 34576  | 0.49 | 0.04 | 9   |
| 1 F46H5.3b  | EIQDQLIK                | 23  | 2078   | 0.49 | 0.10 | 20  |
| 1 F46H5.3b  | AIFDNITDPELAGK          | 33  | 642    | 0.49 | 0.14 | 28  |
| 7 F46H5.3b  | DHFLFK                  | 43  | 19263  | 0.49 | 0.06 | 12  |
| 10 F46H5.3b | DHFLFK                  | 28  | 4317   | 0.49 | 0.25 | 51  |
| 7 F46H5.3b  | EIQDQLIK                | 13  | 1944   | 0.49 | 0.15 | 30  |
| 10 F46H5.3b | DHFLFK                  | 24  | 2280   | 0.49 | 0.23 | 47  |
| 10 F46H5.3b | DHFLFK                  | 29  | 5239   | 0.49 | 0.14 | 28  |
| 7 F46H5.3b  | LQAAPECHSLLK            | 30  | 29093  | 0.49 | 0.12 | 24  |
| 7 F46H5.3b  | YFPLDGMTK               | 11  | 4989   | 0.50 | 0.13 | 25  |
| 10 F46H5.3b | DHFLFK                  | 25  | 2869   | 0.50 | 0.12 | 25  |
| 7 F46H5.3b  | DHFLFK                  | 31  | 15772  | 0.50 | 0.16 | 33  |
| 10 F46H5.3b | AIFDNITDPELAGK          | 85  | 3829   | 0.50 | 0.19 | 38  |
| 7 F46H5.3b  | LQIRGIHGEHSESEGGVYDISNK | 53  | 7316   | 0.50 | 0.17 | 33  |
| 22 F46H5.3b | YFPLDGMTK               | 24  | 28602  | 0.50 | 0.09 | 19  |
| 7 F46H5.3b  | LQIRGIHGEHSESEGGVYDISNK | 18  | 5491   | 0.51 | 0.13 | 24  |
| 1 F46H5.3b  | EIQDQLIK                | 14  | 1080   | 0.51 | 0.11 | 22  |
| 1 F46H5.3b  | LQIRGIHGEHSESEGGVYDISNK | 55  | 15363  | 0.51 | 0.19 | 36  |
| 1 F46H5.3b  | TSALVDLDPEGK            | 34  | 3053   | 0.51 | 0.18 | 35  |
| 22 F46H5.3b | AIFDNITDPELAGK          | 54  | 4832   | 0.52 | 0.21 | 40  |
| 7 F46H5.3b  | TSALVDLDPEGK            | 28  | 1495   | 0.52 | 0.15 | 29  |
| 10 F46H5.3b | DHFLFK                  | 30  | 12982  | 0.52 | 0.06 | 12  |
| 1 F46H5.3b  | ARLGLTEFEAVK            | 16  | 557    | 0.52 | 0.22 | 44  |
| 7 F46H5.3b  | DHFLFK                  | 31  | 35541  | 0.52 | 0.07 | 13  |
| 22 F46H5.3b | DHFLFK                  | 29  | 7732   | 0.52 | 0.11 | 21  |
| 10 F46H5.3b | TSALVDLDPEGK            | 57  | 227802 | 0.52 | 0.12 | 24  |
| 1 F46H5.3b  | AIFDNITDPELAGK          | 20  | 936    | 0.53 | 0.18 | 33  |
| 7 F46H5.3b  | TSALVDLDPEGK            | 39  | 15247  | 0.53 | 0.18 | 34  |
| 1 F46H5.3b  | DHFLFK                  | 24  | 39014  | 0.53 | 0.04 | 7   |
| 1 F46H5.3b  | AIFDNITDPELAGK          | 19  | 971    | 0.53 | 0.18 | 35  |
| 10 F46H5.3b | DHFLFK                  | 26  | 2485   | 0.53 | 0.27 | 51  |
| 7 F46H5.3b  | EIQDQLIK                | 18  | 8098   | 0.53 | 0.11 | 20  |
| 10 F46H5.3b | AIFDNITDPELAGK          | 64  | 2259   | 0.53 | 0.14 | 27  |
| 10 F46H5.3b | TSALVDLDPEGK            | 63  | 184726 | 0.53 | 0.07 | 12  |
| 1 F46H5.3b  | YFPLDGMTK               | 20  | 11150  | 0.54 | 0.02 | 3   |
| 7 F46H5.3b  | LQIRGIHGEHSESEGGVYDISNK | 23  | 33802  | 0.54 | 0.11 | 20  |
| 1 F46H5.3b  | QMYDGIAHLIALEK          | 44  | 935    | 0.54 | 0.09 | 17  |
| 22 F46H5.3b | YFPLDGMTK               | 29  | 23336  | 0.54 | 0.07 | 13  |
| 7 F46H5.3b  | QMYDGIAHLIALEK          | 117 | 6438   | 0.54 | 0.15 | 29  |
| 10 F46H5.3b | DHFLFK                  | 29  | 7164   | 0.54 | 0.04 | 7   |
| 10 F46H5.3b | DHFLFK                  | 14  | 4911   | 0.54 | 0.25 | 45  |
| 22 F46H5.3b | ARLGLTEFEAVK            | 75  | 242932 | 0.54 | 0.07 | 13  |
| 1 F46H5.3b  | ARLGLTEFEAVK            | 74  | 35637  | 0.55 | 0.12 | 21  |
| 10 F46H5.3b | ARLGLTEFEAVK            | 43  | 3465   | 0.55 | 0.17 | 32  |
| 1 F46H5.3b  | DHFLFK                  | 36  | 19805  | 0.55 | 0.09 | 16  |
| 22 F46H5.3b | AIFDNITDPELAGK          | 49  | 3453   | 0.55 | 0.13 | 24  |
| 7 F46H5.3b  | AIFDNITDPELAGK          | 26  | 2088   | 0.55 | 0.10 | 18  |
| 7 F46H5.3b  | AIFDNITDPELAGK          | 36  | 2033   | 0.55 | 0.11 | 20  |
| 22 F46H5.3b | ARLGLTEFEAVK            | 28  | 1249   | 0.56 | 0.16 | 29  |
| 22 F46H5.3b | AIFDNITDPELAGK          | 63  | 4170   | 0.56 | 0.13 | 23  |
| 22 F46H5.3b | EIQDQLIK                | 73  | 395587 | 0.56 | 0.08 | 14  |
| 1 F46H5.3b  | AIFDNITDPELAGK          | 65  | 2151   | 0.56 | 0.19 | 34  |
| 1 F46H5.3b  | LQIRGIHGEHSESEGGVYDISNK | 12  | 89776  | 0.56 | 0.04 | 7   |
| 22 F46H5.3b | AIFDNITDPELAGK          | 85  | 5282   | 0.56 | 0.12 | 22  |
| 10 F46H5.3b | DHFLFK                  | 24  | 2759   | 0.56 | 0.24 | 42  |
| 10 F46H5.3b | LQIRGIHGEHSESEGGVYDISNK | 68  | 14286  | 0.56 | 0.31 | 55  |
| 10 F46H5.3b | LQIRGIHGEHSESEGGVYDISNK | 70  | 13424  | 0.56 | 0.20 | 36  |
| 10 F46H5.3b | LQIRGIHGEHSESEGGVYDISNK | 62  | 19168  | 0.56 | 0.26 | 46  |
| 7 F46H5.3b  | AIFDNITDPELAGK          | 68  | 7037   | 0.57 | 0.09 | 15  |
| 7 F46H5.3b  | DHFLFK                  | 36  | 16476  | 0.57 | 0.08 | 14  |
| 1 F46H5.3b  | QMYDGIAHLIALEK          | 72  | 1698   | 0.57 | 0.14 | 25  |
| 7 F46H5.3b  | EIQDQLIK                | 18  | 8159   | 0.57 | 0.07 | 12  |
| 10 F46H5.3b | DHFLFK                  | 31  | 663338 | 0.58 | 0.11 | 18  |
| 10 F46H5.3b | DHFLFK                  | 24  | 6848   | 0.58 | 0.20 | 35  |

|             |                         |     |        |      |      |    |
|-------------|-------------------------|-----|--------|------|------|----|
| 10 F46H5.3b | DHFLFK                  | 14  | 2236   | 0.58 | 0.18 | 31 |
| 1 F46H5.3b  | QMYDGIAHLIALEK          | 30  | 661    | 0.58 | 0.19 | 33 |
| 7 F46H5.3b  | ARLGLTEFEAVK            | 63  | 38033  | 0.58 | 0.07 | 13 |
| 1 F46H5.3b  | LQAAPECHSLLK            | 48  | 28378  | 0.58 | 0.20 | 34 |
| 10 F46H5.3b | AIFDNITDPELAGK          | 59  | 2484   | 0.58 | 0.10 | 18 |
| 7 F46H5.3b  | YFPLDGMTK               | 43  | 185066 | 0.58 | 0.06 | 10 |
| 7 F46H5.3b  | AIFDNITDPELAGK          | 112 | 101698 | 0.58 | 0.15 | 25 |
| 10 F46H5.3b | DHFLFK                  | 21  | 2409   | 0.58 | 0.09 | 16 |
| 22 F46H5.3b | YFPLDGMTK               | 19  | 22124  | 0.58 | 0.05 | 9  |
| 7 F46H5.3b  | AIFDNITDPELAGK          | 47  | 2165   | 0.58 | 0.08 | 13 |
| 10 F46H5.3b | DHFLFK                  | 24  | 2265   | 0.59 | 0.11 | 18 |
| 10 F46H5.3b | LQIRGIHGEHSESEGGVYDISNK | 56  | 18036  | 0.59 | 0.21 | 35 |
| 22 F46H5.3b | ARLGLTEFEAVK            | 63  | 14049  | 0.59 | 0.08 | 14 |
| 1 F46H5.3b  | LQIRGIHGEHSESEGGVYDISNK | 10  | 8537   | 0.59 | 0.15 | 25 |
| 7 F46H5.3b  | ARLGLTEFEAVK            | 29  | 1934   | 0.59 | 0.23 | 39 |
| 7 F46H5.3b  | AIFDNITDPELAGK          | 105 | 167643 | 0.60 | 0.14 | 23 |
| 10 F46H5.3b | YFPLDGMTK               | 34  | 18316  | 0.60 | 0.17 | 29 |
| 22 F46H5.3b | LQIRGIHGEHSESEGGVYDISNK | 20  | 13960  | 0.60 | 0.08 | 13 |
| 10 F46H5.3b | DHFLFK                  | 17  | 1463   | 0.60 | 0.11 | 19 |
| 10 F46H5.3b | DHFLFK                  | 22  | 8797   | 0.60 | 0.18 | 31 |
| 7 F46H5.3b  | TSALVDLDPEGK            | 28  | 2170   | 0.60 | 0.21 | 35 |
| 1 F46H5.3b  | LQAAPECHSLLK            | 49  | 35082  | 0.60 | 0.12 | 20 |
| 22 F46H5.3b | ARLGLTEFEAVK            | 17  | 812    | 0.60 | 0.17 | 29 |
| 7 F46H5.3b  | DHFLFK                  | 47  | 564346 | 0.60 | 0.11 | 18 |
| 22 F46H5.3b | QMYDGIAHLIALEK          | 64  | 1255   | 0.60 | 0.21 | 35 |
| 7 F46H5.3b  | ARLGLTEFEAVK            | 36  | 6507   | 0.60 | 0.28 | 47 |
| 1 F46H5.3b  | AIFDNITDPELAGK          | 65  | 1736   | 0.61 | 0.19 | 32 |
| 10 F46H5.3b | ARLGLTEFEAVK            | 41  | 2659   | 0.61 | 0.15 | 25 |
| 7 F46H5.3b  | LQIRGIHGEHSESEGGVYDISNK | 26  | 780668 | 0.61 | 0.08 | 13 |
| 1 F46H5.3b  | ARLGLTEFEAVK            | 74  | 29247  | 0.61 | 0.08 | 12 |
| 1 F46H5.3b  | LQIRGIHGEHSESEGGVYDISNK | 26  | 1123   | 0.61 | 0.23 | 37 |
| 22 F46H5.3b | LQIRGIHGEHSESEGGVYDISNK | 58  | 43012  | 0.61 | 0.13 | 21 |
| 22 F46H5.3b | AIFDNITDPELAGK          | 62  | 6661   | 0.61 | 0.14 | 22 |
| 10 F46H5.3b | LQIRGIHGEHSESEGGVYDISNK | 14  | 6191   | 0.61 | 0.08 | 12 |
| 22 F46H5.3b | ARLGLTEFEAVK            | 72  | 255696 | 0.61 | 0.12 | 19 |
| 1 F46H5.3b  | DHFLFK                  | 13  | 1164   | 0.61 | 0.10 | 17 |
| 10 F46H5.3b | DHFLFK                  | 26  | 2789   | 0.62 | 0.14 | 23 |
| 7 F46H5.3b  | QMYDGIAHLIALEK          | 110 | 3209   | 0.62 | 0.21 | 33 |
| 7 F46H5.3b  | DHFLFK                  | 40  | 626470 | 0.62 | 0.11 | 18 |
| 1 F46H5.3b  | DHFLFK                  | 41  | 351357 | 0.62 | 0.04 | 7  |
| 22 F46H5.3b | AIFDNITDPELAGK          | 59  | 2491   | 0.62 | 0.14 | 22 |
| 10 F46H5.3b | LQIRGIHGEHSESEGGVYDISNK | 22  | 50236  | 0.62 | 0.07 | 11 |
| 7 F46H5.3b  | AIFDNITDPELAGK          | 25  | 2600   | 0.62 | 0.21 | 34 |
| 22 F46H5.3b | EIQDQLIK                | 16  | 3344   | 0.62 | 0.13 | 20 |
| 1 F46H5.3b  | TSALVDLDPEGK            | 31  | 1362   | 0.62 | 0.07 | 10 |
| 1 F46H5.3b  | DHFLFK                  | 14  | 7739   | 0.62 | 0.09 | 14 |
| 22 F46H5.3b | LQIRGIHGEHSESEGGVYDISNK | 37  | 27809  | 0.62 | 0.07 | 11 |
| 7 F46H5.3b  | ARLGLTEFEAVK            | 56  | 28175  | 0.63 | 0.11 | 18 |
| 10 F46H5.3b | YFPLDGMTK               | 42  | 48945  | 0.63 | 0.18 | 29 |
| 1 F46H5.3b  | AIFDNITDPELAGK          | 64  | 2178   | 0.63 | 0.15 | 24 |
| 22 F46H5.3b | EIQDQLIK                | 16  | 8987   | 0.63 | 0.10 | 15 |
| 22 F46H5.3b | ARLGLTEFEAVK            | 68  | 17431  | 0.63 | 0.14 | 23 |
| 22 F46H5.3b | ARLGLTEFEAVK            | 54  | 10459  | 0.63 | 0.10 | 16 |
| 1 F46H5.3b  | DHFLFK                  | 21  | 4131   | 0.63 | 0.17 | 26 |
| 1 F46H5.3b  | LQIRGIHGEHSESEGGVYDISNK | 21  | 3405   | 0.63 | 0.08 | 12 |
| 22 F46H5.3b | LQIRGIHGEHSESEGGVYDISNK | 14  | 9519   | 0.63 | 0.22 | 35 |
| 7 F46H5.3b  | LQIRGIHGEHSESEGGVYDISNK | 12  | 4502   | 0.64 | 0.06 | 10 |
| 1 F46H5.3b  | AIFDNITDPELAGK          | 22  | 1611   | 0.64 | 0.15 | 24 |
| 10 F46H5.3b | DHFLFK                  | 20  | 2430   | 0.64 | 0.20 | 32 |
| 10 F46H5.3b | DHFLFK                  | 19  | 49184  | 0.64 | 0.06 | 10 |
| 10 F46H5.3b | DHFLFK                  | 26  | 1559   | 0.64 | 0.18 | 28 |
| 10 F46H5.3b | ARLGLTEFEAVK            | 25  | 918    | 0.64 | 0.14 | 22 |
| 10 F46H5.3b | ARLGLTEFEAVK            | 30  | 1470   | 0.64 | 0.15 | 23 |
| 10 F46H5.3b | LQIRGIHGEHSESEGGVYDISNK | 54  | 38953  | 0.64 | 0.23 | 36 |
| 10 F46H5.3b | ARLGLTEFEAVK            | 26  | 4455   | 0.65 | 0.18 | 28 |
| 1 F46H5.3b  | AIFDNITDPELAGK          | 24  | 1622   | 0.65 | 0.13 | 20 |
| 1 F46H5.3b  | TSALVDLDPEGK            | 38  | 3448   | 0.65 | 0.10 | 15 |
| 7 F46H5.3b  | ARLGLTEFEAVK            | 20  | 1022   | 0.65 | 0.14 | 21 |
| 7 F46H5.3b  | DHFLFK                  | 20  | 3287   | 0.65 | 0.12 | 19 |
| 22 F46H5.3b | YFPLDGMTK               | 19  | 4163   | 0.65 | 0.06 | 10 |
| 22 F46H5.3b | AIFDNITDPELAGK          | 64  | 6701   | 0.65 | 0.13 | 20 |
| 22 F46H5.3b | ARLGLTEFEAVK            | 31  | 1485   | 0.65 | 0.22 | 34 |
| 7 F46H5.3b  | EIQDQLIK                | 23  | 13326  | 0.66 | 0.09 | 14 |
| 10 F46H5.3b | DHFLFK                  | 14  | 1911   | 0.66 | 0.07 | 10 |
| 7 F46H5.3b  | ARLGLTEFEAVK            | 22  | 4115   | 0.66 | 0.13 | 19 |
| 1 F46H5.3b  | LQIRGIHGEHSESEGGVYDISNK | 15  | 4455   | 0.67 | 0.14 | 21 |
| 7 F46H5.3b  | AIFDNITDPELAGK          | 69  | 3355   | 0.67 | 0.14 | 20 |
| 10 F46H5.3b | ARLGLTEFEAVK            | 11  | 872    | 0.67 | 0.16 | 25 |
| 10 F46H5.3b | DHFLFK                  | 18  | 46836  | 0.67 | 0.20 | 30 |
| 1 F46H5.3b  | ARLGLTEFEAVK            | 14  | 704    | 0.67 | 0.11 | 17 |
| 7 F46H5.3b  | QMYDGIAHLIALEK          | 110 | 4466   | 0.67 | 0.10 | 14 |
| 22 F46H5.3b | EIQDQLIK                | 20  | 6261   | 0.67 | 0.14 | 20 |
| 7 F46H5.3b  | YFPLDGMTK               | 41  | 146458 | 0.67 | 0.07 | 10 |
| 10 F46H5.3b | ARLGLTEFEAVK            | 31  | 1203   | 0.67 | 0.09 | 13 |
| 10 F46H5.3b | QMYDGIAHLIALEK          | 38  | 1441   | 0.68 | 0.22 | 32 |
| 10 F46H5.3b | LQIRGIHGEHSESEGGVYDISNK | 64  | 33773  | 0.68 | 0.22 | 32 |
| 22 F46H5.3b | EIQDQLIK                | 24  | 9009   | 0.68 | 0.15 | 22 |
| 22 F46H5.3b | DHFLFK                  | 13  | 2824   | 0.68 | 0.26 | 39 |
| 22 F46H5.3b | ARLGLTEFEAVK            | 25  | 1044   | 0.68 | 0.14 | 21 |
| 1 F46H5.3b  | ARLGLTEFEAVK            | 41  | 4277   | 0.68 | 0.12 | 18 |
| 7 F46H5.3b  | EIQDQLIK                | 13  | 2077   | 0.68 | 0.17 | 25 |
| 22 F46H5.3b | LQIRGIHGEHSESEGGVYDISNK | 19  | 13258  | 0.68 | 0.10 | 15 |
| 1 F46H5.3b  | LQIRGIHGEHSESEGGVYDISNK | 12  | 11840  | 0.68 | 0.07 | 10 |
| 22 F46H5.3b | QPNTDLGEGK              | 46  | 93827  | 0.68 | 0.14 | 20 |
| 7 F46H5.3b  | LQIRGIHGEHSESEGGVYDISNK | 14  | 14751  | 0.69 | 0.13 | 19 |
| 22 F46H5.3b | AIFDNITDPELAGK          | 18  | 1120   | 0.69 | 0.11 | 17 |
| 10 F46H5.3b | DHFLFK                  | 20  | 4517   | 0.69 | 0.17 | 25 |
| 7 F46H5.3b  | AIFDNITDPELAGK          | 63  | 3581   | 0.69 | 0.14 | 20 |
| 1 F46H5.3b  | DHFLFK                  | 15  | 1396   | 0.70 | 0.12 | 17 |
| 22 F46H5.3b | DHFLFK                  | 24  | 2492   | 0.70 | 0.10 | 14 |
| 10 F46H5.3b | AIFDNITDPELAGK          | 41  | 3116   | 0.70 | 0.12 | 17 |

|             |                         |     |        |      |      |    |
|-------------|-------------------------|-----|--------|------|------|----|
| 7 F46H5.3b  | AIFDNITDPELAGK          | 54  | 2961   | 0.70 | 0.08 | 12 |
| 22 F46H5.3b | LQIRGIHGEHSESEGGVYDISNK | 18  | 17623  | 0.70 | 0.07 | 9  |
| 10 F46H5.3b | DHFLFK                  | 30  | 4952   | 0.71 | 0.22 | 31 |
| 22 F46H5.3b | DHFLFK                  | 23  | 2279   | 0.71 | 0.05 | 7  |
| 10 F46H5.3b | LQIRGIHGEHSESEGGVYDISNK | 25  | 39357  | 0.71 | 0.19 | 26 |
| 7 F46H5.3b  | AIFDNITDPELAGK          | 87  | 4484   | 0.71 | 0.13 | 19 |
| 10 F46H5.3b | DHFLFK                  | 13  | 1873   | 0.71 | 0.16 | 23 |
| 7 F46H5.3b  | ARLGLTEFEAVK            | 61  | 9975   | 0.71 | 0.09 | 12 |
| 22 F46H5.3b | QMYDGIAHLIALEK          | 37  | 1047   | 0.72 | 0.13 | 18 |
| 10 F46H5.3b | DHFLFK                  | 20  | 4077   | 0.72 | 0.19 | 27 |
| 7 F46H5.3b  | DHFLFK                  | 22  | 1926   | 0.72 | 0.11 | 15 |
| 1 F46H5.3b  | DHFLFK                  | 21  | 1480   | 0.72 | 0.11 | 15 |
| 10 F46H5.3b | QPNTDLGEGK              | 15  | 4846   | 0.72 | 0.67 | 94 |
| 10 F46H5.3b | LQIRGIHGEHSESEGGVYDISNK | 14  | 13984  | 0.72 | 0.19 | 27 |
| 10 F46H5.3b | DHFLFK                  | 13  | 3108   | 0.72 | 0.07 | 10 |
| 7 F46H5.3b  | AIFDNITDPELAGK          | 64  | 2530   | 0.72 | 0.14 | 19 |
| 7 F46H5.3b  | AIFDNITDPELAGK          | 52  | 1690   | 0.72 | 0.12 | 16 |
| 1 F46H5.3b  | AIFDNITDPELAGK          | 37  | 1847   | 0.72 | 0.12 | 17 |
| 22 F46H5.3b | ARLGLTEFEAVK            | 13  | 489    | 0.73 | 0.18 | 25 |
| 10 F46H5.3b | QMYDGIAHLIALEK          | 51  | 2067   | 0.73 | 0.10 | 13 |
| 10 F46H5.3b | AIFDNITDPELAGK          | 53  | 3793   | 0.73 | 0.17 | 23 |
| 22 F46H5.3b | YFPLDGMTK               | 11  | 5471   | 0.73 | 0.11 | 15 |
| 10 F46H5.3b | LQIRGIHGEHSESEGGVYDISNK | 15  | 3544   | 0.73 | 0.39 | 53 |
| 7 F46H5.3b  | QMYDGIAHLIALEK          | 80  | 3678   | 0.73 | 0.17 | 24 |
| 22 F46H5.3b | EIQDQLIK                | 22  | 5360   | 0.73 | 0.10 | 14 |
| 10 F46H5.3b | DHFLFK                  | 16  | 2262   | 0.73 | 0.23 | 31 |
| 7 F46H5.3b  | EIQDQLIK                | 14  | 5297   | 0.73 | 0.09 | 13 |
| 1 F46H5.3b  | DHFLFK                  | 12  | 1675   | 0.73 | 0.02 | 3  |
| 1 F46H5.3b  | DHFLFK                  | 32  | 1547   | 0.73 | 0.08 | 11 |
| 1 F46H5.3b  | QMYDGIAHLIALEK          | 26  | 604    | 0.73 | 0.19 | 26 |
| 7 F46H5.3b  | LQIRGIHGEHSESEGGVYDISNK | 28  | 354824 | 0.74 | 0.18 | 24 |
| 10 F46H5.3b | LQAAPECHSLLK            | 11  | 1305   | 0.74 | 0.34 | 46 |
| 22 F46H5.3b | DHFLFK                  | 15  | 2320   | 0.74 | 0.07 | 10 |
| 7 F46H5.3b  | ARLGLTEFEAVK            | 10  | 2722   | 0.74 | 0.30 | 41 |
| 22 F46H5.3b | ARLGLTEFEAVK            | 51  | 10281  | 0.74 | 0.13 | 18 |
| 10 F46H5.3b | LQIRGIHGEHSESEGGVYDISNK | 76  | 38259  | 0.74 | 0.21 | 28 |
| 10 F46H5.3b | DHFLFK                  | 24  | 2548   | 0.74 | 0.12 | 16 |
| 7 F46H5.3b  | AIFDNITDPELAGK          | 82  | 3714   | 0.75 | 0.12 | 17 |
| 1 F46H5.3b  | DHFLFK                  | 26  | 1825   | 0.75 | 0.17 | 23 |
| 10 F46H5.3b | YFPLDGMTK               | 21  | 6264   | 0.75 | 0.06 | 8  |
| 22 F46H5.3b | DHFLFK                  | 15  | 1460   | 0.75 | 0.19 | 25 |
| 1 F46H5.3b  | YFPLDGMTK               | 13  | 1938   | 0.75 | 0.18 | 24 |
| 7 F46H5.3b  | EIQDQLIK                | 27  | 1632   | 0.75 | 0.33 | 44 |
| 7 F46H5.3b  | AIFDNITDPELAGK          | 80  | 5715   | 0.75 | 0.14 | 19 |
| 1 F46H5.3b  | ARLGLTEFEAVK            | 17  | 461    | 0.75 | 0.20 | 27 |
| 22 F46H5.3b | QPNTDLGEGK              | 25  | 56112  | 0.76 | 0.18 | 24 |
| 22 F46H5.3b | EIQDQLIK                | 22  | 4535   | 0.76 | 0.11 | 14 |
| 7 F46H5.3b  | ARLGLTEFEAVK            | 53  | 8854   | 0.76 | 0.09 | 12 |
| 1 F46H5.3b  | LQIRGIHGEHSESEGGVYDISNK | 45  | 16661  | 0.76 | 0.13 | 17 |
| 22 F46H5.3b | DHFLFK                  | 11  | 2529   | 0.76 | 0.36 | 48 |
| 7 F46H5.3b  | AIFDNITDPELAGK          | 65  | 4236   | 0.76 | 0.12 | 15 |
| 10 F46H5.3b | LQIRGIHGEHSESEGGVYDISNK | 51  | 37243  | 0.76 | 0.24 | 32 |
| 22 F46H5.3b | DHFLFK                  | 23  | 27321  | 0.76 | 0.10 | 13 |
| 1 F46H5.3b  | YFPLDGMTK               | 67  | 43232  | 0.76 | 0.10 | 14 |
| 10 F46H5.3b | LQIRGIHGEHSESEGGVYDISNK | 28  | 14180  | 0.77 | 0.23 | 30 |
| 22 F46H5.3b | AIFDNITDPELAGK          | 62  | 4009   | 0.77 | 0.14 | 18 |
| 7 F46H5.3b  | LQIRGIHGEHSESEGGVYDISNK | 16  | 103506 | 0.77 | 0.10 | 13 |
| 10 F46H5.3b | DHFLFK                  | 17  | 2499   | 0.77 | 0.22 | 29 |
| 7 F46H5.3b  | ARLGLTEFEAVK            | 33  | 1643   | 0.77 | 0.11 | 14 |
| 1 F46H5.3b  | AIFDNITDPELAGK          | 43  | 1027   | 0.77 | 0.14 | 18 |
| 22 F46H5.3b | AIFDNITDPELAGK          | 44  | 3980   | 0.77 | 0.09 | 12 |
| 22 F46H5.3b | DHFLFK                  | 11  | 1167   | 0.78 | 0.20 | 26 |
| 22 F46H5.3b | ARLGLTEFEAVK            | 43  | 3758   | 0.78 | 0.09 | 11 |
| 1 F46H5.3b  | ARLGLTEFEAVK            | 11  | 944    | 0.78 | 0.15 | 19 |
| 10 F46H5.3b | EVVDQLK                 | 26  | 8125   | 0.78 | 0.45 | 58 |
| 22 F46H5.3b | ARLGLTEFEAVK            | 30  | 3111   | 0.78 | 0.10 | 13 |
| 1 F46H5.3b  | AIFDNITDPELAGK          | 114 | 84004  | 0.78 | 0.10 | 13 |
| 7 F46H5.3b  | LQIRGIHGEHSESEGGVYDISNK | 68  | 34794  | 0.78 | 0.11 | 14 |
| 7 F46H5.3b  | ARLGLTEFEAVK            | 29  | 1974   | 0.78 | 0.13 | 16 |
| 1 F46H5.3b  | QMYDGIAHLIALEK          | 21  | 796    | 0.78 | 0.13 | 17 |
| 7 F46H5.3b  | ARLGLTEFEAVK            | 81  | 414608 | 0.79 | 0.08 | 10 |
| 7 F46H5.3b  | LQIRGIHGEHSESEGGVYDISNK | 15  | 5626   | 0.79 | 0.21 | 26 |
| 10 F46H5.3b | DHFLFK                  | 15  | 4865   | 0.79 | 0.08 | 10 |
| 10 F46H5.3b | ARLGLTEFEAVK            | 31  | 3693   | 0.79 | 0.10 | 12 |
| 7 F46H5.3b  | LQIRGIHGEHSESEGGVYDISNK | 14  | 8826   | 0.80 | 0.08 | 10 |
| 1 F46H5.3b  | AIFDNITDPELAGK          | 47  | 1339   | 0.80 | 0.11 | 14 |
| 7 F46H5.3b  | ARLGLTEFEAVK            | 13  | 835    | 0.80 | 0.14 | 18 |
| 7 F46H5.3b  | LQIRGIHGEHSESEGGVYDISNK | 45  | 13742  | 0.80 | 0.07 | 8  |
| 10 F46H5.3b | YFPLDGMTK               | 41  | 56685  | 0.80 | 0.17 | 21 |
| 22 F46H5.3b | LQIRGIHGEHSESEGGVYDISNK | 18  | 5232   | 0.80 | 0.19 | 24 |
| 7 F46H5.3b  | TSALVDLDPEGK            | 61  | 267693 | 0.80 | 0.09 | 11 |
| 10 F46H5.3b | QMYDGIAHLIALEK          | 54  | 2129   | 0.81 | 0.10 | 13 |
| 7 F46H5.3b  | AIFDNITDPELAGK          | 64  | 3635   | 0.81 | 0.11 | 14 |
| 10 F46H5.3b | DHFLFK                  | 15  | 1638   | 0.81 | 0.12 | 15 |
| 7 F46H5.3b  | ARLGLTEFEAVK            | 21  | 2111   | 0.81 | 0.10 | 12 |
| 7 F46H5.3b  | QMYDGIAHLIALEK          | 69  | 1690   | 0.81 | 0.15 | 18 |
| 7 F46H5.3b  | AIFDNITDPELAGK          | 44  | 2044   | 0.81 | 0.11 | 14 |
| 10 F46H5.3b | DHFLFK                  | 25  | 1844   | 0.81 | 0.33 | 41 |
| 1 F46H5.3b  | QMYDGIAHLIALEK          | 54  | 937    | 0.81 | 0.29 | 36 |
| 22 F46H5.3b | YFPLDGMTK               | 43  | 134354 | 0.81 | 0.13 | 16 |
| 1 F46H5.3b  | QMYDGIAHLIALEK          | 17  | 1593   | 0.82 | 0.10 | 12 |
| 7 F46H5.3b  | LQIRGIHGEHSESEGGVYDISNK | 11  | 11562  | 0.82 | 0.23 | 28 |
| 10 F46H5.3b | QMYDGIAHLIALEK          | 35  | 1474   | 0.82 | 0.19 | 24 |
| 7 F46H5.3b  | DHFLFK                  | 14  | 29875  | 0.82 | 0.09 | 11 |
| 10 F46H5.3b | DHFLFK                  | 14  | 1357   | 0.82 | 0.19 | 23 |
| 7 F46H5.3b  | AIFDNITDPELAGK          | 66  | 2984   | 0.82 | 0.10 | 12 |
| 10 F46H5.3b | QMYDGIAHLIALEK          | 23  | 1771   | 0.82 | 0.13 | 15 |
| 22 F46H5.3b | ARLGLTEFEAVK            | 37  | 4781   | 0.82 | 0.14 | 17 |
| 10 F46H5.3b | DHFLFK                  | 14  | 1338   | 0.82 | 0.26 | 32 |
| 7 F46H5.3b  | ARLGLTEFEAVK            | 48  | 1173   | 0.82 | 0.17 | 21 |
| 7 F46H5.3b  | DHFLFK                  | 21  | 5887   | 0.82 | 0.02 | 3  |

|             |                         |     |        |      |      |    |
|-------------|-------------------------|-----|--------|------|------|----|
| 22 F46H5.3b | LQIRGIHGEHSESEGGVYDISNK | 55  | 21108  | 0.82 | 0.14 | 17 |
| 10 F46H5.3b | YFPLDGMTK               | 28  | 6102   | 0.82 | 0.14 | 17 |
| 10 F46H5.3b | DHFLFK                  | 18  | 1713   | 0.83 | 0.22 | 26 |
| 1 F46H5.3b  | AIFDNITDPELAGK          | 108 | 76131  | 0.83 | 0.07 | 9  |
| 1 F46H5.3b  | DHFLFK                  | 35  | 5682   | 0.83 | 0.18 | 21 |
| 7 F46H5.3b  | DHFLFK                  | 15  | 20001  | 0.83 | 0.05 | 6  |
| 1 F46H5.3b  | DHFLFK                  | 10  | 2614   | 0.83 | 0.17 | 21 |
| 22 F46H5.3b | QMYDGIAHLIALEK          | 43  | 2764   | 0.83 | 0.19 | 23 |
| 1 F46H5.3b  | LQIRGIHGEHSESEGGVYDISNK | 10  | 4553   | 0.83 | 0.08 | 10 |
| 1 F46H5.3b  | LQIRGIHGEHSESEGGVYDISNK | 47  | 11434  | 0.83 | 0.12 | 15 |
| 22 F46H5.3b | DHFLFK                  | 29  | 12355  | 0.83 | 0.06 | 8  |
| 1 F46H5.3b  | DHFLFK                  | 14  | 1446   | 0.83 | 0.09 | 10 |
| 10 F46H5.3b | LQIRGIHGEHSESEGGVYDISNK | 13  | 11903  | 0.83 | 0.10 | 12 |
| 22 F46H5.3b | EIQDQLIK                | 14  | 2907   | 0.83 | 0.15 | 19 |
| 10 F46H5.3b | DHFLFK                  | 22  | 1327   | 0.83 | 0.28 | 33 |
| 22 F46H5.3b | DHFLFK                  | 12  | 2441   | 0.83 | 0.17 | 21 |
| 22 F46H5.3b | AIFDNITDPELAGK          | 63  | 2573   | 0.83 | 0.08 | 10 |
| 22 F46H5.3b | DHFLFK                  | 11  | 650    | 0.83 | 0.11 | 13 |
| 22 F46H5.3b | ARLGLTEFEAVK            | 21  | 918    | 0.83 | 0.07 | 8  |
| 10 F46H5.3b | DHFLFK                  | 27  | 1275   | 0.83 | 0.14 | 16 |
| 10 F46H5.3b | QMYDGIAHLIALEK          | 93  | 89003  | 0.83 | 0.13 | 16 |
| 1 F46H5.3b  | LQIRGIHGEHSESEGGVYDISNK | 11  | 18297  | 0.83 | 0.07 | 8  |
| 10 F46H5.3b | LQIRGIHGEHSESEGGVYDISNK | 61  | 14901  | 0.83 | 0.35 | 42 |
| 1 F46H5.3b  | QMYDGIAHLIALEK          | 30  | 749    | 0.83 | 0.19 | 23 |
| 10 F46H5.3b | QMYDGIAHLIALEK          | 64  | 1986   | 0.83 | 0.13 | 15 |
| 7 F46H5.3b  | ARLGLTEFEAVK            | 30  | 4795   | 0.83 | 0.18 | 21 |
| 1 F46H5.3b  | DHFLFK                  | 28  | 2491   | 0.84 | 0.14 | 17 |
| 22 F46H5.3b | DHFLFK                  | 30  | 11751  | 0.84 | 0.08 | 9  |
| 10 F46H5.3b | EIQDQLIK                | 19  | 5272   | 0.84 | 0.15 | 18 |
| 10 F46H5.3b | DHFLFK                  | 18  | 1316   | 0.84 | 0.24 | 28 |
| 22 F46H5.3b | ARLGLTEFEAVK            | 39  | 3301   | 0.84 | 0.13 | 16 |
| 22 F46H5.3b | LQIRGIHGEHSESEGGVYDISNK | 62  | 19327  | 0.84 | 0.15 | 17 |
| 7 F46H5.3b  | ARLGLTEFEAVK            | 51  | 8543   | 0.84 | 0.14 | 16 |
| 7 F46H5.3b  | DHFLFK                  | 20  | 4290   | 0.84 | 0.09 | 10 |
| 1 F46H5.3b  | AIFDNITDPELAGK          | 23  | 740    | 0.84 | 0.14 | 17 |
| 22 F46H5.3b | DHFLFK                  | 13  | 1174   | 0.84 | 0.20 | 24 |
| 7 F46H5.3b  | DHFLFK                  | 25  | 22136  | 0.84 | 0.11 | 13 |
| 22 F46H5.3b | DHFLFK                  | 14  | 2207   | 0.84 | 0.05 | 6  |
| 7 F46H5.3b  | QMYDGIAHLIALEK          | 11  | 4081   | 0.84 | 0.31 | 37 |
| 1 F46H5.3b  | LQIRGIHGEHSESEGGVYDISNK | 57  | 13808  | 0.85 | 0.14 | 16 |
| 1 F46H5.3b  | YFPLDGMTK               | 46  | 44347  | 0.85 | 0.11 | 13 |
| 1 F46H5.3b  | DHFLFK                  | 17  | 4398   | 0.85 | 0.14 | 16 |
| 7 F46H5.3b  | LQIRGIHGEHSESEGGVYDISNK | 13  | 8521   | 0.85 | 0.29 | 34 |
| 1 F46H5.3b  | QMYDGIAHLIALEK          | 85  | 17442  | 0.85 | 0.08 | 10 |
| 10 F46H5.3b | QMYDGIAHLIALEK          | 72  | 75865  | 0.85 | 0.15 | 18 |
| 22 F46H5.3b | DHFLFK                  | 17  | 29932  | 0.85 | 0.09 | 11 |
| 22 F46H5.3b | DHFLFK                  | 23  | 1787   | 0.86 | 0.11 | 12 |
| 1 F46H5.3b  | LQIRGIHGEHSESEGGVYDISNK | 46  | 7822   | 0.86 | 0.07 | 9  |
| 1 F46H5.3b  | QMYDGIAHLIALEK          | 66  | 1961   | 0.86 | 0.18 | 21 |
| 7 F46H5.3b  | DHFLFK                  | 19  | 3680   | 0.86 | 0.09 | 10 |
| 22 F46H5.3b | ARLGLTEFEAVK            | 26  | 1740   | 0.86 | 0.12 | 14 |
| 7 F46H5.3b  | DHFLFK                  | 23  | 16758  | 0.86 | 0.04 | 4  |
| 1 F46H5.3b  | AIFDNITDPELAGK          | 66  | 3686   | 0.86 | 0.13 | 15 |
| 7 F46H5.3b  | QMYDGIAHLIALEK          | 43  | 1861   | 0.86 | 0.16 | 19 |
| 10 F46H5.3b | QMYDGIAHLIALEK          | 51  | 3920   | 0.86 | 0.16 | 19 |
| 7 F46H5.3b  | QPNTDLGEGK              | 28  | 14046  | 0.86 | 0.46 | 54 |
| 7 F46H5.3b  | DHFLFK                  | 21  | 3066   | 0.86 | 0.09 | 10 |
| 1 F46H5.3b  | DHFLFK                  | 15  | 1144   | 0.86 | 0.12 | 14 |
| 1 F46H5.3b  | ARLGLTEFEAVK            | 11  | 306    | 0.86 | 0.16 | 19 |
| 7 F46H5.3b  | ARLGLTEFEAVK            | 75  | 287622 | 0.86 | 0.11 | 13 |
| 1 F46H5.3b  | QMYDGIAHLIALEK          | 35  | 664    | 0.87 | 0.18 | 21 |
| 7 F46H5.3b  | ARLGLTEFEAVK            | 13  | 1057   | 0.87 | 0.22 | 25 |
| 1 F46H5.3b  | QMYDGIAHLIALEK          | 53  | 1509   | 0.87 | 0.31 | 36 |
| 22 F46H5.3b | ARLGLTEFEAVK            | 24  | 1616   | 0.87 | 0.13 | 15 |
| 10 F46H5.3b | DHFLFK                  | 21  | 2216   | 0.87 | 0.16 | 19 |
| 10 F46H5.3b | DHFLFK                  | 16  | 1259   | 0.87 | 0.16 | 18 |
| 1 F46H5.3b  | DHFLFK                  | 12  | 2906   | 0.87 | 0.08 | 9  |
| 22 F46H5.3b | ARLGLTEFEAVK            | 43  | 3597   | 0.87 | 0.11 | 12 |
| 7 F46H5.3b  | EIQDQLIK                | 15  | 5111   | 0.87 | 0.10 | 11 |
| 10 F46H5.3b | QMYDGIAHLIALEK          | 62  | 1076   | 0.88 | 0.16 | 18 |
| 10 F46H5.3b | QMYDGIAHLIALEK          | 55  | 2736   | 0.88 | 0.14 | 16 |
| 22 F46H5.3b | DHFLFK                  | 23  | 7041   | 0.88 | 0.09 | 11 |
| 7 F46H5.3b  | DHFLFK                  | 13  | 2813   | 0.88 | 0.05 | 6  |
| 22 F46H5.3b | ARLGLTEFEAVK            | 25  | 3194   | 0.88 | 0.09 | 10 |
| 7 F46H5.3b  | DHFLFK                  | 20  | 3112   | 0.88 | 0.14 | 16 |
| 10 F46H5.3b | DHFLFK                  | 20  | 2421   | 0.88 | 0.16 | 18 |
| 22 F46H5.3b | DHFLFK                  | 14  | 1592   | 0.89 | 0.09 | 10 |
| 1 F46H5.3b  | DHFLFK                  | 11  | 1220   | 0.89 | 0.14 | 16 |
| 22 F46H5.3b | YFPLDGMTK               | 53  | 165611 | 0.89 | 0.03 | 4  |
| 7 F46H5.3b  | ARLGLTEFEAVK            | 26  | 1341   | 0.89 | 0.13 | 15 |
| 22 F46H5.3b | LQIRGIHGEHSESEGGVYDISNK | 11  | 3852   | 0.89 | 0.21 | 23 |
| 22 F46H5.3b | DHFLFK                  | 13  | 1846   | 0.89 | 0.05 | 5  |
| 10 F46H5.3b | AIFDNITDPELAGK          | 40  | 4366   | 0.89 | 0.17 | 19 |
| 1 F46H5.3b  | EIQDQLIK                | 55  | 33079  | 0.89 | 0.07 | 8  |
| 1 F46H5.3b  | QMYDGIAHLIALEK          | 14  | 1381   | 0.90 | 0.08 | 9  |
| 10 F46H5.3b | QMYDGIAHLIALEK          | 65  | 2426   | 0.90 | 0.15 | 17 |
| 10 F46H5.3b | EIQDQLIK                | 15  | 6124   | 0.90 | 0.13 | 14 |
| 7 F46H5.3b  | AIFDNITDPELAGK          | 33  | 2347   | 0.90 | 0.15 | 17 |
| 22 F46H5.3b | LQIRGIHGEHSESEGGVYDISNK | 16  | 17547  | 0.90 | 0.16 | 18 |
| 22 F46H5.3b | DHFLFK                  | 22  | 2693   | 0.90 | 0.09 | 10 |
| 1 F46H5.3b  | QMYDGIAHLIALEK          | 85  | 21162  | 0.90 | 0.14 | 15 |
| 1 F46H5.3b  | ARLGLTEFEAVK            | 15  | 491    | 0.90 | 0.21 | 23 |
| 1 F46H5.3b  | AIFDNITDPELAGK          | 46  | 1814   | 0.90 | 0.12 | 14 |
| 1 F46H5.3b  | AIFDNITDPELAGK          | 54  | 3012   | 0.91 | 0.16 | 17 |
| 7 F46H5.3b  | DHFLFK                  | 10  | 940    | 0.91 | 0.09 | 10 |
| 10 F46H5.3b | QMYDGIAHLIALEK          | 52  | 1903   | 0.91 | 0.16 | 17 |
| 22 F46H5.3b | LQIRGIHGEHSESEGGVYDISNK | 11  | 3275   | 0.91 | 0.29 | 32 |
| 7 F46H5.3b  | DHFLFK                  | 44  | 11224  | 0.91 | 0.07 | 7  |
| 22 F46H5.3b | QMYDGIAHLIALEK          | 45  | 2232   | 0.92 | 0.19 | 21 |
| 22 F46H5.3b | DHFLFK                  | 14  | 2543   | 0.92 | 0.08 | 9  |
| 10 F46H5.3b | QMYDGIAHLIALEK          | 35  | 18474  | 0.92 | 0.16 | 17 |

|             |                         |    |        |      |      |    |
|-------------|-------------------------|----|--------|------|------|----|
| 1 F46H5.3b  | ARLGLTEFEAVK            | 11 | 347    | 0.92 | 0.12 | 13 |
| 22 F46H5.3b | QMYDGIAHLIALEK          | 41 | 1750   | 0.92 | 0.23 | 25 |
| 7 F46H5.3b  | DHFLFK                  | 16 | 1277   | 0.92 | 0.14 | 15 |
| 1 F46H5.3b  | ARLGLTEFEAVK            | 12 | 657    | 0.92 | 0.17 | 18 |
| 10 F46H5.3b | AIFDNITDPELAGK          | 83 | 6844   | 0.92 | 0.14 | 15 |
| 1 F46H5.3b  | AIFDNITDPELAGK          | 60 | 2253   | 0.92 | 0.25 | 27 |
| 10 F46H5.3b | ARLGLTEFEAVK            | 42 | 1551   | 0.92 | 0.20 | 22 |
| 1 F46H5.3b  | QMYDGIAHLIALEK          | 29 | 1231   | 0.93 | 0.09 | 10 |
| 10 F46H5.3b | YFPLDGMTK               | 15 | 1381   | 0.93 | 0.21 | 23 |
| 7 F46H5.3b  | AIFDNITDPELAGK          | 90 | 4316   | 0.93 | 0.12 | 12 |
| 7 F46H5.3b  | EIQDQLIK                | 24 | 6307   | 0.93 | 0.15 | 16 |
| 7 F46H5.3b  | QMYDGIAHLIALEK          | 15 | 1597   | 0.93 | 0.09 | 10 |
| 10 F46H5.3b | ARLGLTEFEAVK            | 30 | 823    | 0.93 | 0.09 | 10 |
| 22 F46H5.3b | DHFLFK                  | 11 | 2139   | 0.93 | 0.13 | 14 |
| 1 F46H5.3b  | DHFLFK                  | 12 | 1526   | 0.94 | 0.10 | 11 |
| 7 F46H5.3b  | ARLGLTEFEAVK            | 20 | 1269   | 0.94 | 0.10 | 11 |
| 7 F46H5.3b  | ARLGLTEFEAVK            | 24 | 1752   | 0.94 | 0.11 | 12 |
| 10 F46H5.3b | LQIRGIHGEHSESEGGVYDISNK | 11 | 6012   | 0.94 | 0.14 | 15 |
| 22 F46H5.3b | DHFLFK                  | 23 | 3875   | 0.94 | 0.17 | 19 |
| 1 F46H5.3b  | DHFLFK                  | 20 | 7075   | 0.94 | 0.20 | 21 |
| 7 F46H5.3b  | DHFLFK                  | 15 | 4348   | 0.94 | 0.06 | 6  |
| 7 F46H5.3b  | AIFDNITDPELAGK          | 76 | 3048   | 0.94 | 0.08 | 9  |
| 22 F46H5.3b | LQIRGIHGEHSESEGGVYDISNK | 29 | 598275 | 0.94 | 0.08 | 9  |
| 1 F46H5.3b  | QMYDGIAHLIALEK          | 50 | 912    | 0.95 | 0.15 | 16 |
| 1 F46H5.3b  | YFPLDGMTK               | 64 | 88859  | 0.95 | 0.11 | 12 |
| 22 F46H5.3b | DHFLFK                  | 11 | 713    | 0.95 | 0.11 | 12 |
| 22 F46H5.3b | YFPLDGMTK               | 13 | 6339   | 0.95 | 0.18 | 19 |
| 22 F46H5.3b | DHFLFK                  | 22 | 1223   | 0.95 | 0.14 | 15 |
| 10 F46H5.3b | QMYDGIAHLIALEK          | 64 | 2891   | 0.95 | 0.13 | 13 |
| 7 F46H5.3b  | DHFLFK                  | 12 | 4712   | 0.95 | 0.07 | 7  |
| 7 F46H5.3b  | ARLGLTEFEAVK            | 12 | 650    | 0.95 | 0.26 | 27 |
| 22 F46H5.3b | DHFLFK                  | 18 | 4969   | 0.95 | 0.08 | 9  |
| 1 F46H5.3b  | EIQDQLIK                | 67 | 33153  | 0.95 | 0.05 | 5  |
| 1 F46H5.3b  | TSALVDLDPEGK            | 60 | 113225 | 0.95 | 0.08 | 9  |
| 22 F46H5.3b | DHFLFK                  | 14 | 1426   | 0.96 | 0.07 | 7  |
| 22 F46H5.3b | YFPLDGMTK               | 21 | 5487   | 0.96 | 0.12 | 13 |
| 1 F46H5.3b  | DHFLFK                  | 14 | 3109   | 0.96 | 0.09 | 9  |
| 10 F46H5.3b | ARLGLTEFEAVK            | 25 | 2171   | 0.96 | 0.10 | 10 |
| 22 F46H5.3b | DHFLFK                  | 16 | 3072   | 0.96 | 0.06 | 6  |
| 1 F46H5.3b  | DHFLFK                  | 15 | 1359   | 0.96 | 0.11 | 12 |
| 1 F46H5.3b  | DHFLFK                  | 10 | 1337   | 0.96 | 0.05 | 6  |
| 7 F46H5.3b  | QMYDGIAHLIALEK          | 19 | 2952   | 0.97 | 0.41 | 42 |
| 1 F46H5.3b  | DHFLFK                  | 21 | 2492   | 0.97 | 0.10 | 10 |
| 7 F46H5.3b  | ARLGLTEFEAVK            | 16 | 3808   | 0.97 | 0.16 | 17 |
| 7 F46H5.3b  | DHFLFK                  | 10 | 2234   | 0.97 | 0.14 | 15 |
| 22 F46H5.3b | DHFLFK                  | 31 | 14974  | 0.97 | 0.08 | 8  |
| 1 F46H5.3b  | ARLGLTEFEAVK            | 31 | 1045   | 0.97 | 0.19 | 19 |
| 10 F46H5.3b | AIFDNITDPELAGK          | 54 | 3563   | 0.97 | 0.14 | 14 |
| 22 F46H5.3b | DHFLFK                  | 16 | 6603   | 0.98 | 0.08 | 8  |
| 10 F46H5.3b | ARLGLTEFEAVK            | 27 | 1530   | 0.98 | 0.28 | 29 |
| 10 F46H5.3b | YFPLDGMTK               | 11 | 6276   | 0.98 | 0.19 | 19 |
| 1 F46H5.3b  | ARLGLTEFEAVK            | 51 | 2137   | 0.98 | 0.11 | 11 |
| 22 F46H5.3b | DHFLFK                  | 16 | 2065   | 0.98 | 0.08 | 8  |
| 7 F46H5.3b  | AIFDNITDPELAGK          | 47 | 2065   | 0.98 | 0.10 | 10 |
| 1 F46H5.3b  | ARLGLTEFEAVK            | 15 | 671    | 0.98 | 0.14 | 14 |
| 1 F46H5.3b  | ARLGLTEFEAVK            | 68 | 182201 | 0.98 | 0.09 | 9  |
| 22 F46H5.3b | QMYDGIAHLIALEK          | 46 | 1540   | 0.98 | 0.11 | 11 |
| 1 F46H5.3b  | AIFDNITDPELAGK          | 21 | 606    | 0.99 | 0.03 | 3  |
| 7 F46H5.3b  | DHFLFK                  | 36 | 12493  | 0.99 | 0.08 | 8  |
| 10 F46H5.3b | ARLGLTEFEAVK            | 21 | 1026   | 0.99 | 0.26 | 26 |
| 22 F46H5.3b | QPNTDLGEGK              | 15 | 15418  | 0.99 | 0.06 | 6  |
| 22 F46H5.3b | AIFDNITDPELAGK          | 33 | 3603   | 0.99 | 0.13 | 13 |
| 22 F46H5.3b | YFPLDGMTK               | 50 | 149456 | 0.99 | 0.12 | 12 |
| 1 F46H5.3b  | ARLGLTEFEAVK            | 40 | 1759   | 1.00 | 0.18 | 18 |
| 22 F46H5.3b | DHFLFK                  | 17 | 1627   | 1.00 | 0.12 | 12 |
| 22 F46H5.3b | DHFLFK                  | 14 | 1214   | 1.00 | 0.10 | 10 |
| 7 F46H5.3b  | DHFLFK                  | 39 | 3381   | 1.00 | 0.11 | 11 |
| 22 F46H5.3b | YFPLDGMTK               | 19 | 5723   | 1.00 | 0.08 | 8  |
| 10 F46H5.3b | QMYDGIAHLIALEK          | 58 | 3926   | 1.00 | 0.11 | 11 |
| 22 F46H5.3b | DHFLFK                  | 16 | 2324   | 1.00 | 0.28 | 28 |
| 7 F46H5.3b  | QMYDGIAHLIALEK          | 27 | 1195   | 1.01 | 0.24 | 24 |
| 1 F46H5.3b  | DHFLFK                  | 11 | 1641   | 1.01 | 0.07 | 7  |
| 1 F46H5.3b  | LQIRGIHGEHSESEGGVYDISNK | 19 | 3101   | 1.01 | 0.10 | 10 |
| 22 F46H5.3b | AIFDNITDPELAGK          | 46 | 1716   | 1.01 | 0.18 | 18 |
| 7 F46H5.3b  | QMYDGIAHLIALEK          | 20 | 7810   | 1.01 | 0.07 | 7  |
| 7 F46H5.3b  | DHFLFK                  | 19 | 3523   | 1.01 | 0.09 | 9  |
| 1 F46H5.3b  | DHFLFK                  | 39 | 403285 | 1.01 | 0.11 | 11 |
| 7 F46H5.3b  | QMYDGIAHLIALEK          | 13 | 2362   | 1.01 | 0.05 | 5  |
| 1 F46H5.3b  | LQIRGIHGEHSESEGGVYDISNK | 46 | 4983   | 1.01 | 0.12 | 12 |
| 10 F46H5.3b | LQIRGIHGEHSESEGGVYDISNK | 15 | 6917   | 1.01 | 0.17 | 17 |
| 22 F46H5.3b | AIFDNITDPELAGK          | 43 | 3994   | 1.02 | 0.23 | 22 |
| 7 F46H5.3b  | DHFLFK                  | 12 | 3470   | 1.02 | 0.11 | 11 |
| 1 F46H5.3b  | YFPLDGMTK               | 60 | 74158  | 1.02 | 0.09 | 9  |
| 10 F46H5.3b | DHFLFK                  | 25 | 694    | 1.02 | 0.22 | 22 |
| 7 F46H5.3b  | DHFLFK                  | 22 | 3356   | 1.02 | 0.10 | 10 |
| 7 F46H5.3b  | DHFLFK                  | 23 | 3607   | 1.03 | 0.10 | 9  |
| 1 F46H5.3b  | QMYDGIAHLIALEK          | 58 | 2054   | 1.03 | 0.15 | 15 |
| 10 F46H5.3b | ARLGLTEFEAVK            | 45 | 2934   | 1.03 | 0.09 | 9  |
| 22 F46H5.3b | QMYDGIAHLIALEK          | 48 | 1740   | 1.03 | 0.17 | 17 |
| 10 F46H5.3b | DHFLFK                  | 22 | 1165   | 1.03 | 0.19 | 19 |
| 1 F46H5.3b  | AIFDNITDPELAGK          | 12 | 868    | 1.03 | 0.13 | 12 |
| 7 F46H5.3b  | TSALVDLDPEGK            | 62 | 227936 | 1.03 | 0.10 | 10 |
| 1 F46H5.3b  | QMYDGIAHLIALEK          | 49 | 1036   | 1.04 | 0.18 | 17 |
| 1 F46H5.3b  | QMYDGIAHLIALEK          | 40 | 1394   | 1.04 | 0.07 | 7  |
| 22 F46H5.3b | TSALVDLDPEGK            | 68 | 264963 | 1.04 | 0.08 | 7  |
| 1 F46H5.3b  | ARLGLTEFEAVK            | 14 | 911    | 1.05 | 0.13 | 12 |
| 22 F46H5.3b | QMYDGIAHLIALEK          | 98 | 148410 | 1.05 | 0.08 | 8  |
| 1 F46H5.3b  | QMYDGIAHLIALEK          | 43 | 1875   | 1.05 | 0.15 | 14 |
| 7 F46H5.3b  | QMYDGIAHLIALEK          | 16 | 12780  | 1.05 | 0.25 | 23 |
| 1 F46H5.3b  | QMYDGIAHLIALEK          | 14 | 3395   | 1.05 | 0.13 | 12 |
| 22 F46H5.3b | DHFLFK                  | 16 | 747    | 1.05 | 0.19 | 18 |

|             |                         |     |         |      |      |    |
|-------------|-------------------------|-----|---------|------|------|----|
| 10 F46H5.3b | QMYDGIAHLIALEK          | 82  | 4353    | 1.06 | 0.19 | 18 |
| 22 F46H5.3b | LQIRGIHGEHSESEGGVYDISNK | 13  | 1305    | 1.06 | 0.25 | 24 |
| 1 F46H5.3b  | QMYDGIAHLIALEK          | 31  | 5705    | 1.06 | 0.14 | 13 |
| 22 F46H5.3b | QMYDGIAHLIALEK          | 37  | 2234    | 1.06 | 0.13 | 12 |
| 22 F46H5.3b | ARLGLTEFEAVK            | 36  | 3579    | 1.06 | 0.09 | 9  |
| 7 F46H5.3b  | DHFLFK                  | 24  | 4017    | 1.06 | 0.10 | 9  |
| 1 F46H5.3b  | DHFLFK                  | 11  | 1397    | 1.07 | 0.10 | 10 |
| 10 F46H5.3b | DHFLFK                  | 31  | 3182    | 1.07 | 0.33 | 31 |
| 10 F46H5.3b | QMYDGIAHLIALEK          | 10  | 2270    | 1.07 | 0.08 | 7  |
| 22 F46H5.3b | LQIRGIHGEHSESEGGVYDISNK | 72  | 11614   | 1.07 | 0.13 | 12 |
| 10 F46H5.3b | DHFLFK                  | 23  | 3145    | 1.07 | 0.16 | 15 |
| 22 F46H5.3b | LQIRGIHGEHSESEGGVYDISNK | 15  | 79610   | 1.07 | 0.18 | 17 |
| 22 F46H5.3b | DHFLFK                  | 11  | 1399    | 1.07 | 0.09 | 8  |
| 7 F46H5.3b  | QMYDGIAHLIALEK          | 89  | 5203    | 1.07 | 0.12 | 11 |
| 22 F46H5.3b | DHFLFK                  | 13  | 1232    | 1.08 | 0.17 | 16 |
| 22 F46H5.3b | QMYDGIAHLIALEK          | 40  | 3061    | 1.08 | 0.13 | 12 |
| 1 F46H5.3b  | ARLGLTEFEAVK            | 19  | 1063    | 1.08 | 0.10 | 9  |
| 22 F46H5.3b | QMYDGIAHLIALEK          | 78  | 1816    | 1.08 | 0.14 | 13 |
| 22 F46H5.3b | DHFLFK                  | 14  | 4827    | 1.08 | 0.08 | 8  |
| 1 F46H5.3b  | TSALVDLDPEGK            | 58  | 119811  | 1.08 | 0.15 | 14 |
| 22 F46H5.3b | DHFLFK                  | 25  | 2782    | 1.08 | 0.05 | 4  |
| 7 F46H5.3b  | QMYDGIAHLIALEK          | 90  | 96155   | 1.09 | 0.12 | 11 |
| 22 F46H5.3b | QMYDGIAHLIALEK          | 75  | 2666    | 1.09 | 0.13 | 12 |
| 1 F46H5.3b  | LQAAPECHSLLK            | 19  | 3328    | 1.09 | 0.28 | 26 |
| 22 F46H5.3b | DHFLFK                  | 17  | 1842    | 1.09 | 0.02 | 2  |
| 7 F46H5.3b  | ARLGLTEFEAVK            | 56  | 1619    | 1.09 | 0.11 | 10 |
| 10 F46H5.3b | YFPLDGMTK               | 31  | 4760    | 1.10 | 0.13 | 12 |
| 22 F46H5.3b | QMYDGIAHLIALEK          | 88  | 2908    | 1.10 | 0.11 | 10 |
| 7 F46H5.3b  | QMYDGIAHLIALEK          | 43  | 2559    | 1.10 | 0.11 | 10 |
| 7 F46H5.3b  | DHFLFK                  | 14  | 3303    | 1.10 | 0.10 | 9  |
| 22 F46H5.3b | QPNTDLGEGK              | 13  | 19377   | 1.11 | 0.06 | 6  |
| 22 F46H5.3b | DHFLFK                  | 16  | 15293   | 1.11 | 0.04 | 4  |
| 10 F46H5.3b | QMYDGIAHLIALEK          | 60  | 2484    | 1.11 | 0.12 | 11 |
| 1 F46H5.3b  | ARLGLTEFEAVK            | 71  | 189152  | 1.11 | 0.11 | 10 |
| 22 F46H5.3b | DHFLFK                  | 11  | 4981    | 1.11 | 0.10 | 9  |
| 1 F46H5.3b  | AIFDNITDPELAGK          | 53  | 1570    | 1.11 | 0.19 | 17 |
| 7 F46H5.3b  | QMYDGIAHLIALEK          | 51  | 2932    | 1.11 | 0.14 | 12 |
| 22 F46H5.3b | DHFLFK                  | 20  | 1296    | 1.12 | 0.09 | 8  |
| 22 F46H5.3b | DHFLFK                  | 36  | 3721    | 1.12 | 0.13 | 12 |
| 7 F46H5.3b  | QMYDGIAHLIALEK          | 102 | 68805   | 1.12 | 0.12 | 11 |
| 7 F46H5.3b  | DHFLFK                  | 24  | 3327    | 1.12 | 0.12 | 11 |
| 10 F46H5.3b | AIFDNITDPELAGK          | 40  | 1634    | 1.12 | 0.10 | 9  |
| 22 F46H5.3b | DHFLFK                  | 33  | 2031    | 1.12 | 0.13 | 12 |
| 22 F46H5.3b | YFPLDGMTK               | 61  | 223692  | 1.13 | 0.14 | 12 |
| 7 F46H5.3b  | QMYDGIAHLIALEK          | 29  | 1727    | 1.13 | 0.10 | 9  |
| 22 F46H5.3b | ARLGLTEFEAVK            | 50  | 3818    | 1.13 | 0.14 | 12 |
| 22 F46H5.3b | DHFLFK                  | 17  | 5654    | 1.13 | 0.10 | 9  |
| 22 F46H5.3b | DHFLFK                  | 12  | 1752    | 1.13 | 0.08 | 7  |
| 1 F46H5.3b  | QMYDGIAHLIALEK          | 73  | 4732    | 1.14 | 0.10 | 8  |
| 7 F46H5.3b  | AIFDNITDPELAGK          | 10  | 1988    | 1.14 | 0.16 | 14 |
| 1 F46H5.3b  | LQAAPECHSLLK            | 29  | 4052    | 1.14 | 0.08 | 7  |
| 22 F46H5.3b | DHFLFK                  | 15  | 2992    | 1.14 | 0.12 | 11 |
| 22 F46H5.3b | QMYDGIAHLIALEK          | 64  | 2773    | 1.15 | 0.15 | 13 |
| 1 F46H5.3b  | QMYDGIAHLIALEK          | 37  | 1437    | 1.15 | 0.18 | 16 |
| 22 F46H5.3b | QMYDGIAHLIALEK          | 55  | 37021   | 1.16 | 0.13 | 11 |
| 7 F46H5.3b  | YFPLDGMTK               | 40  | 41194   | 1.16 | 0.13 | 12 |
| 10 F46H5.3b | QMYDGIAHLIALEK          | 84  | 7802    | 1.16 | 0.19 | 17 |
| 22 F46H5.3b | LQIRGIHGEHSESEGGVYDISNK | 18  | 384376  | 1.16 | 0.06 | 5  |
| 22 F46H5.3b | QMYDGIAHLIALEK          | 87  | 160664  | 1.16 | 0.10 | 9  |
| 7 F46H5.3b  | QMYDGIAHLIALEK          | 64  | 9525    | 1.16 | 0.14 | 12 |
| 7 F46H5.3b  | YFPLDGMTK               | 39  | 89159   | 1.17 | 0.09 | 8  |
| 22 F46H5.3b | DHFLFK                  | 11  | 1447    | 1.17 | 0.14 | 12 |
| 22 F46H5.3b | EVVDQLK                 | 25  | 22840   | 1.17 | 0.29 | 25 |
| 10 F46H5.3b | QMYDGIAHLIALEK          | 26  | 8863    | 1.17 | 0.17 | 15 |
| 22 F46H5.3b | DHFLFK                  | 27  | 3298    | 1.17 | 0.14 | 12 |
| 1 F46H5.3b  | DHFLFK                  | 11  | 1574    | 1.18 | 0.15 | 12 |
| 7 F46H5.3b  | ARLGLTEFEAVK            | 15  | 725     | 1.18 | 0.15 | 13 |
| 7 F46H5.3b  | DHFLFK                  | 36  | 2325    | 1.18 | 0.17 | 14 |
| 7 F46H5.3b  | QMYDGIAHLIALEK          | 81  | 5139    | 1.18 | 0.21 | 18 |
| 1 F46H5.3b  | QMYDGIAHLIALEK          | 52  | 1677    | 1.18 | 0.24 | 21 |
| 1 F46H5.3b  | ARLGLTEFEAVK            | 11  | 1012    | 1.18 | 0.12 | 10 |
| 22 F46H5.3b | QMYDGIAHLIALEK          | 68  | 2827    | 1.18 | 0.15 | 13 |
| 1 F46H5.3b  | EIQDQLIK                | 14  | 1188    | 1.19 | 0.10 | 9  |
| 22 F46H5.3b | LQIRGIHGEHSESEGGVYDISNK | 50  | 21495   | 1.19 | 0.09 | 7  |
| 22 F46H5.3b | DHFLFK                  | 11  | 670     | 1.19 | 0.13 | 11 |
| 1 F46H5.3b  | YFPLDGMTK               | 14  | 1702    | 1.19 | 0.13 | 11 |
| 1 F46H5.3b  | DHFLFK                  | 25  | 4841    | 1.19 | 0.10 | 9  |
| 10 F46H5.3b | DHFLFK                  | 15  | 2269    | 1.19 | 0.14 | 12 |
| 7 F46H5.3b  | DHFLFK                  | 15  | 3065    | 1.20 | 0.17 | 14 |
| 10 F46H5.3b | AIFDNITDPELAGK          | 75  | 3908    | 1.20 | 0.16 | 13 |
| 7 F46H5.3b  | QMYDGIAHLIALEK          | 11  | 2274    | 1.20 | 0.18 | 15 |
| 22 F46H5.3b | QMYDGIAHLIALEK          | 41  | 38473   | 1.20 | 0.21 | 18 |
| 7 F46H5.3b  | ARLGLTEFEAVK            | 36  | 5501    | 1.20 | 0.17 | 14 |
| 22 F46H5.3b | YFPLDGMTK               | 15  | 3734    | 1.20 | 0.16 | 13 |
| 22 F46H5.3b | DHFLFK                  | 12  | 1401    | 1.20 | 0.12 | 10 |
| 22 F46H5.3b | TSALVDLDPEGK            | 60  | 252068  | 1.21 | 0.10 | 8  |
| 7 F46H5.3b  | DHFLFK                  | 45  | 725711  | 1.22 | 0.04 | 3  |
| 10 F46H5.3b | ARLGLTEFEAVK            | 22  | 1847    | 1.22 | 0.08 | 7  |
| 22 F46H5.3b | DHFLFK                  | 10  | 1340    | 1.22 | 0.12 | 10 |
| 22 F46H5.3b | YFPLDGMTK               | 11  | 3879    | 1.23 | 0.20 | 16 |
| 22 F46H5.3b | DHFLFK                  | 15  | 847     | 1.23 | 0.10 | 8  |
| 7 F46H5.3b  | QMYDGIAHLIALEK          | 50  | 3045    | 1.23 | 0.09 | 7  |
| 22 F46H5.3b | DHFLFK                  | 36  | 16940   | 1.23 | 0.04 | 3  |
| 10 F46H5.3b | AIFDNITDPELAGK          | 43  | 3216    | 1.23 | 0.16 | 13 |
| 22 F46H5.3b | ARLGLTEFEAVK            | 47  | 2941    | 1.23 | 0.07 | 6  |
| 1 F46H5.3b  | DHFLFK                  | 20  | 2811    | 1.24 | 0.09 | 7  |
| 7 F46H5.3b  | QMYDGIAHLIALEK          | 68  | 3222    | 1.24 | 0.20 | 16 |
| 10 F46H5.3b | DHFLFK                  | 14  | 609     | 1.24 | 0.11 | 9  |
| 7 F46H5.3b  | YFPLDGMTK               | 23  | 10543   | 1.24 | 0.18 | 15 |
| 7 F46H5.3b  | ARLGLTEFEAVK            | 29  | 1997    | 1.25 | 0.20 | 16 |
| 22 F46H5.3b | DHFLFK                  | 54  | 1095610 | 1.25 | 0.08 | 6  |

|             |                         |    |         |      |      |    |
|-------------|-------------------------|----|---------|------|------|----|
| 22 F46H5.3b | QMYDGIAHLIALEK          | 87 | 6049    | 1.26 | 0.09 | 7  |
| 7 F46H5.3b  | QMYDGIAHLIALEK          | 18 | 6511    | 1.26 | 0.07 | 6  |
| 10 F46H5.3b | QMYDGIAHLIALEK          | 38 | 20303   | 1.26 | 0.16 | 13 |
| 10 F46H5.3b | YFPLDGMTK               | 14 | 4415    | 1.27 | 0.12 | 9  |
| 22 F46H5.3b | AIFDNITDPELAGK          | 86 | 11919   | 1.27 | 0.10 | 8  |
| 1 F46H5.3b  | YFPLDGMTK               | 11 | 3854    | 1.28 | 0.19 | 14 |
| 1 F46H5.3b  | AIFDNITDPELAGK          | 49 | 1182    | 1.29 | 0.23 | 18 |
| 1 F46H5.3b  | TSALVDLDPEGK            | 31 | 1394    | 1.29 | 0.29 | 23 |
| 7 F46H5.3b  | ARLGLTEFEAVK            | 14 | 2323    | 1.29 | 0.11 | 9  |
| 22 F46H5.3b | DHFLFK                  | 15 | 683     | 1.29 | 0.12 | 10 |
| 7 F46H5.3b  | YFPLDGMTK               | 14 | 2239    | 1.29 | 0.14 | 11 |
| 7 F46H5.3b  | QMYDGIAHLIALEK          | 72 | 3595    | 1.29 | 0.09 | 7  |
| 22 F46H5.3b | QMYDGIAHLIALEK          | 15 | 8021    | 1.30 | 0.10 | 8  |
| 10 F46H5.3b | AIFDNITDPELAGK          | 51 | 1375    | 1.30 | 0.25 | 19 |
| 22 F46H5.3b | QMYDGIAHLIALEK          | 33 | 7522    | 1.31 | 0.10 | 8  |
| 22 F46H5.3b | ARLGLTEFEAVK            | 51 | 2507    | 1.31 | 0.09 | 7  |
| 22 F46H5.3b | DHFLFK                  | 13 | 6897    | 1.32 | 0.03 | 3  |
| 22 F46H5.3b | EIQDQLIK                | 11 | 8219    | 1.32 | 0.16 | 12 |
| 22 F46H5.3b | QMYDGIAHLIALEK          | 75 | 2553    | 1.33 | 0.11 | 8  |
| 10 F46H5.3b | AIFDNITDPELAGK          | 88 | 4562    | 1.33 | 0.16 | 12 |
| 7 F46H5.3b  | ARLGLTEFEAVK            | 48 | 1948    | 1.34 | 0.08 | 6  |
| 22 F46H5.3b | EIQDQLIK                | 19 | 13409   | 1.34 | 0.07 | 5  |
| 7 F46H5.3b  | ARLGLTEFEAVK            | 23 | 1208    | 1.34 | 0.19 | 14 |
| 7 F46H5.3b  | DHFLFK                  | 39 | 550166  | 1.34 | 0.08 | 6  |
| 1 F46H5.3b  | ARLGLTEFEAVK            | 10 | 223     | 1.35 | 0.23 | 17 |
| 22 F46H5.3b | DHFLFK                  | 26 | 10423   | 1.35 | 0.08 | 6  |
| 22 F46H5.3b | DHFLFK                  | 41 | 1230350 | 1.36 | 0.05 | 4  |
| 1 F46H5.3b  | AIFDNITDPELAGK          | 81 | 3112    | 1.36 | 0.12 | 9  |
| 1 F46H5.3b  | QMYDGIAHLIALEK          | 37 | 2060    | 1.36 | 0.13 | 10 |
| 10 F46H5.3b | EIQDQLIK                | 11 | 3760    | 1.36 | 0.07 | 5  |
| 7 F46H5.3b  | DHFLFK                  | 28 | 6071    | 1.36 | 0.11 | 8  |
| 10 F46H5.3b | QMYDGIAHLIALEK          | 32 | 4767    | 1.36 | 0.05 | 4  |
| 22 F46H5.3b | DHFLFK                  | 24 | 2462    | 1.37 | 0.17 | 12 |
| 1 F46H5.3b  | AIFDNITDPELAGK          | 34 | 1545    | 1.37 | 0.16 | 12 |
| 22 F46H5.3b | QMYDGIAHLIALEK          | 79 | 8151    | 1.37 | 0.09 | 6  |
| 7 F46H5.3b  | ARLGLTEFEAVK            | 30 | 1671    | 1.37 | 0.15 | 11 |
| 10 F46H5.3b | QMYDGIAHLIALEK          | 53 | 2883    | 1.38 | 0.10 | 8  |
| 22 F46H5.3b | QMYDGIAHLIALEK          | 64 | 2705    | 1.38 | 0.12 | 9  |
| 1 F46H5.3b  | ARLGLTEFEAVK            | 11 | 878     | 1.39 | 0.08 | 6  |
| 1 F46H5.3b  | QMYDGIAHLIALEK          | 28 | 1427    | 1.40 | 0.29 | 21 |
| 7 F46H5.3b  | QMYDGIAHLIALEK          | 81 | 6218    | 1.40 | 0.12 | 8  |
| 7 F46H5.3b  | QMYDGIAHLIALEK          | 58 | 3130    | 1.41 | 0.14 | 10 |
| 22 F46H5.3b | QMYDGIAHLIALEK          | 71 | 3963    | 1.42 | 0.13 | 9  |
| 10 F46H5.3b | DHFLFK                  | 34 | 18836   | 1.42 | 0.05 | 3  |
| 7 F46H5.3b  | DHFLFK                  | 13 | 8675    | 1.43 | 0.03 | 2  |
| 7 F46H5.3b  | ARLGLTEFEAVK            | 30 | 1019    | 1.44 | 0.14 | 9  |
| 7 F46H5.3b  | QMYDGIAHLIALEK          | 18 | 6557    | 1.47 | 0.09 | 6  |
| 10 F46H5.3b | QMYDGIAHLIALEK          | 42 | 1427    | 1.47 | 0.11 | 7  |
| 22 F46H5.3b | QMYDGIAHLIALEK          | 36 | 1155    | 1.48 | 0.24 | 16 |
| 7 F46H5.3b  | ARLGLTEFEAVK            | 31 | 3196    | 1.48 | 0.10 | 7  |
| 1 F46H5.3b  | DHFLFK                  | 25 | 4519    | 1.50 | 0.08 | 6  |
| 22 F46H5.3b | YFPLDGMTK               | 13 | 7506    | 1.50 | 0.14 | 9  |
| 10 F46H5.3b | QMYDGIAHLIALEK          | 69 | 2016    | 1.51 | 0.15 | 10 |
| 22 F46H5.3b | EVVDQLK                 | 10 | 10096   | 1.51 | 0.29 | 19 |
| 7 F46H5.3b  | ARLGLTEFEAVK            | 34 | 2519    | 1.51 | 0.12 | 8  |
| 7 F46H5.3b  | ARLGLTEFEAVK            | 18 | 874     | 1.51 | 0.13 | 9  |
| 10 F46H5.3b | DHFLFK                  | 34 | 22349   | 1.51 | 0.07 | 5  |
| 7 F46H5.3b  | ARLGLTEFEAVK            | 23 | 2458    | 1.52 | 0.16 | 11 |
| 10 F46H5.3b | DHFLFK                  | 48 | 13437   | 1.52 | 0.09 | 6  |
| 22 F46H5.3b | ARLGLTEFEAVK            | 14 | 2416    | 1.52 | 0.23 | 15 |
| 1 F46H5.3b  | DHFLFK                  | 27 | 3298    | 1.53 | 0.06 | 4  |
| 22 F46H5.3b | QMYDGIAHLIALEK          | 23 | 2787    | 1.53 | 0.36 | 23 |
| 22 F46H5.3b | ARLGLTEFEAVK            | 49 | 2267    | 1.55 | 0.12 | 8  |
| 22 F46H5.3b | TSALVDLDPEGK            | 22 | 1528    | 1.56 | 0.23 | 15 |
| 7 F46H5.3b  | AIFDNITDPELAGK          | 94 | 6677    | 1.56 | 0.10 | 7  |
| 7 F46H5.3b  | QMYDGIAHLIALEK          | 48 | 2232    | 1.56 | 0.11 | 7  |
| 1 F46H5.3b  | EIQDQLIK                | 16 | 5718    | 1.57 | 0.06 | 4  |
| 22 F46H5.3b | DHFLFK                  | 13 | 6821    | 1.57 | 0.07 | 4  |
| 7 F46H5.3b  | ARLGLTEFEAVK            | 18 | 1085    | 1.57 | 0.20 | 13 |
| 22 F46H5.3b | DHFLFK                  | 12 | 2684    | 1.57 | 0.16 | 10 |
| 22 F46H5.3b | LQIRGIHGEHSESEGGVYDISNK | 16 | 23715   | 1.57 | 0.10 | 7  |
| 22 F46H5.3b | AIFDNITDPELAGK          | 48 | 4534    | 1.58 | 0.09 | 6  |
| 10 F46H5.3b | ARLGLTEFEAVK            | 27 | 4521    | 1.58 | 0.09 | 6  |
| 1 F46H5.3b  | ARLGLTEFEAVK            | 41 | 1393    | 1.59 | 0.15 | 9  |
| 7 F46H5.3b  | QMYDGIAHLIALEK          | 50 | 2737    | 1.60 | 0.12 | 8  |
| 7 F46H5.3b  | AIFDNITDPELAGK          | 80 | 5149    | 1.62 | 0.10 | 6  |
| 10 F46H5.3b | LQAAPECHSLLK            | 46 | 18489   | 1.63 | 0.14 | 9  |
| 1 F46H5.3b  | EIQDQLIK                | 10 | 3764    | 1.63 | 0.18 | 11 |
| 10 F46H5.3b | LQAAPECHSLLK            | 47 | 13585   | 1.64 | 0.18 | 11 |
| 10 F46H5.3b | DHFLFK                  | 30 | 12002   | 1.64 | 0.06 | 3  |
| 7 F46H5.3b  | LQAAPECHSLLK            | 16 | 6189    | 1.66 | 0.17 | 11 |
| 10 F46H5.3b | QMYDGIAHLIALEK          | 50 | 2249    | 1.66 | 0.09 | 6  |
| 22 F46H5.3b | QMYDGIAHLIALEK          | 71 | 4869    | 1.69 | 0.16 | 9  |
| 1 F46H5.3b  | ARLGLTEFEAVK            | 38 | 1012    | 1.70 | 0.23 | 13 |
| 7 F46H5.3b  | ARLGLTEFEAVK            | 61 | 10182   | 1.71 | 0.10 | 6  |
| 1 F46H5.3b  | DHFLFK                  | 40 | 7584    | 1.71 | 0.07 | 4  |
| 10 F46H5.3b | ARLGLTEFEAVK            | 27 | 1642    | 1.73 | 0.19 | 11 |
| 22 F46H5.3b | ARLGLTEFEAVK            | 43 | 2299    | 1.74 | 0.11 | 6  |
| 22 F46H5.3b | QMYDGIAHLIALEK          | 13 | 1545    | 1.75 | 0.18 | 11 |
| 1 F46H5.3b  | DHFLFK                  | 37 | 5336    | 1.75 | 0.09 | 5  |
| 10 F46H5.3b | TSALVDLDPEGK            | 13 | 1316    | 1.78 | 0.05 | 3  |
| 1 F46H5.3b  | ARLGLTEFEAVK            | 25 | 1138    | 1.79 | 0.19 | 10 |
| 22 F46H5.3b | DHFLFK                  | 24 | 6134    | 1.82 | 0.05 | 3  |
| 22 F46H5.3b | ARLGLTEFEAVK            | 16 | 753     | 1.83 | 0.17 | 10 |
| 1 F46H5.3b  | TSALVDLDPEGK            | 26 | 2376    | 1.83 | 0.19 | 10 |
| 10 F46H5.3b | ARLGLTEFEAVK            | 48 | 3339    | 1.83 | 0.07 | 4  |
| 10 F46H5.3b | ARLGLTEFEAVK            | 56 | 5514    | 1.84 | 0.09 | 5  |
| 10 F46H5.3b | DHFLFK                  | 39 | 14622   | 1.85 | 0.08 | 4  |
| 22 F46H5.3b | ARLGLTEFEAVK            | 45 | 8269    | 1.86 | 0.08 | 4  |
| 7 F46H5.3b  | GRGIFHNNQK              | 35 | 174156  | 1.86 | 0.11 | 6  |
| 1 F46H5.3b  | ARLGLTEFEAVK            | 40 | 2690    | 1.87 | 0.10 | 5  |

|             |                         |    |        |      |      |     |
|-------------|-------------------------|----|--------|------|------|-----|
| 7 F46H5.3b  | QMYDGIAHLIALEK          | 10 | 2825   | 1.87 | 0.44 | 23  |
| 22 F46H5.3b | QMYDGIAHLIALEK          | 11 | 4792   | 1.88 | 0.10 | 5   |
| 22 F46H5.3b | ARLGLTEFEAVK            | 30 | 3320   | 1.90 | 0.07 | 4   |
| 1 F46H5.3b  | GRGIFHNNQK              | 28 | 7685   | 1.93 | 0.06 | 3   |
| 1 F46H5.3b  | TSALVDLDPEGK            | 14 | 1008   | 1.94 | 0.09 | 5   |
| 10 F46H5.3b | ARLGLTEFEAVK            | 57 | 3147   | 1.96 | 0.15 | 8   |
| 22 F46H5.3b | ARLGLTEFEAVK            | 29 | 3085   | 1.98 | 0.12 | 6   |
| 10 F46H5.3b | ARLGLTEFEAVK            | 18 | 2426   | 2.01 | 0.09 | 5   |
| 10 F46H5.3b | DHFLFK                  | 49 | 15154  | 2.02 | 0.06 | 3   |
| 1 F46H5.3b  | TSALVDLDPEGK            | 22 | 1747   | 2.04 | 0.21 | 10  |
| 10 F46H5.3b | GRGIFHNNQK              | 12 | 11984  | 2.04 | 0.05 | 2   |
| 7 F46H5.3b  | GRGIFHNNQK              | 16 | 237409 | 2.06 | 0.12 | 6   |
| 1 F46H5.3b  | ARLGLTEFEAVK            | 52 | 2665   | 2.09 | 0.13 | 6   |
| 1 F46H5.3b  | ARLGLTEFEAVK            | 38 | 1604   | 2.10 | 0.19 | 9   |
| 10 F46H5.3b | ARLGLTEFEAVK            | 30 | 2182   | 2.16 | 0.12 | 6   |
| 7 F46H5.3b  | GRGIFHNNQK              | 16 | 1044   | 2.18 | 0.09 | 4   |
| 7 F46H5.3b  | LQAAPECHSLLK            | 64 | 27365  | 2.25 | 0.11 | 5   |
| 7 F46H5.3b  | LQAAPECHSLLK            | 20 | 6021   | 2.26 | 0.20 | 9   |
| 7 F46H5.3b  | DHFLFK                  | 12 | 4959   | 2.28 | 0.07 | 3   |
| 7 F46H5.3b  | DHFLFK                  | 23 | 2845   | 2.28 | 0.08 | 4   |
| 10 F46H5.3b | DHFLFK                  | 46 | 21090  | 2.34 | 0.11 | 4   |
| 10 F46H5.3b | DHFLFK                  | 41 | 17305  | 2.38 | 0.07 | 3   |
| 22 F46H5.3b | LQAAPECHSLLK            | 68 | 25391  | 2.38 | 0.08 | 3   |
| 1 F46H5.3b  | TSALVDLDPEGK            | 26 | 1735   | 2.45 | 0.16 | 7   |
| 7 F46H5.3b  | LQAAPECHSLLK            | 60 | 31712  | 2.46 | 0.19 | 8   |
| 1 F46H5.3b  | ARLGLTEFEAVK            | 37 | 1568   | 2.50 | 0.09 | 4   |
| 10 F46H5.3b | QMYDGIAHLIALEK          | 71 | 2446   | 2.52 | 0.15 | 6   |
| 1 F46H5.3b  | QMYDGIAHLIALEK          | 36 | 992    | 2.53 | 0.27 | 10  |
| 7 F46H5.3b  | YFPLDGMTK               | 14 | 3817   | 2.65 | 0.11 | 4   |
| 10 F46H5.3b | LQIRGIHGEHSESEGGVYDISNK | 19 | 10810  | 2.68 | 0.08 | 3   |
| 1 F46H5.3b  | ARLGLTEFEAVK            | 27 | 1483   | 2.77 | 0.12 | 4   |
| 22 F46H5.3b | LQAAPECHSLLK            | 32 | 16670  | 2.78 | 0.12 | 4   |
| 7 F46H5.3b  | ARLGLTEFEAVK            | 48 | 3142   | 2.91 | 0.27 | 9   |
| 7 F46H5.3b  | TSALVDLDPEGK            | 12 | 2745   | 2.95 | 0.15 | 5   |
| 22 F46H5.3b | ARLGLTEFEAVK            | 36 | 4838   | 2.95 | 0.17 | 6   |
| 1 F46H5.3b  | LQAAPECHSLLK            | 46 | 27286  | 2.97 | 0.10 | 3   |
| 7 F46H5.3b  | DHFLFK                  | 42 | 16614  | 2.98 | 0.10 | 3   |
| 7 F46H5.3b  | ARLGLTEFEAVK            | 39 | 7289   | 3.00 | 0.11 | 4   |
| 7 F46H5.3b  | ARLGLTEFEAVK            | 50 | 3228   | 3.00 | 0.12 | 4   |
| 22 F46H5.3b | TSALVDLDPEGK            | 28 | 8323   | 3.01 | 0.10 | 3   |
| 10 F46H5.3b | QMYDGIAHLIALEK          | 45 | 1803   | 3.11 | 0.23 | 7   |
| 1 F46H5.3b  | LQAAPECHSLLK            | 53 | 16993  | 3.31 | 0.16 | 5   |
| 7 F46H5.3b  | GRGIFHNNQK              | 19 | 1552   | 3.45 | 0.16 | 5   |
| 10 F46H5.3b | LQIRGIHGEHSESEGGVYDISNK | 16 | 6752   | 3.50 | 0.10 | 3   |
| 22 F46H5.3b | ARLGLTEFEAVK            | 47 | 7141   | 3.51 | 0.11 | 3   |
| 1 F46H5.3b  | ARLGLTEFEAVK            | 48 | 2174   | 3.59 | 0.15 | 4   |
| 10 F46H5.3b | QMYDGIAHLIALEK          | 13 | 2224   | 3.69 | 0.28 | 8   |
| 7 F46H5.3b  | QMYDGIAHLIALEK          | 57 | 3376   | 3.97 | 0.23 | 6   |
| 10 F46H5.3b | ARLGLTEFEAVK            | 41 | 3284   | 4.24 | 0.22 | 5   |
| 7 F46H5.3b  | LQIRGIHGEHSESEGGVYDISNK | 11 | 12607  | 4.29 | 0.25 | 6   |
| 1 F46H5.3b  | TSALVDLDPEGK            | 28 | 3270   | 4.36 | 0.20 | 5   |
| 7 F46H5.3b  | DHFLFK                  | 24 | 4268   | 4.38 | 0.22 | 5   |
| 7 F46H5.3b  | LQIRGIHGEHSESEGGVYDISNK | 28 | 10639  | 4.57 | 0.06 | 1   |
| 7 F46H5.3b  | LQIRGIHGEHSESEGGVYDISNK | 14 | 4042   | 4.62 | 0.14 | 3   |
| 10 F46H5.3b | DHFLFK                  | 35 | 4351   | 4.64 | 0.08 | 2   |
| 7 F46H5.3b  | GRGIFHNNQK              | 27 | 2698   | 4.81 | 0.08 | 2   |
| 22 F46H5.3b | TSALVDLDPEGK            | 22 | 7438   | 5.14 | 0.22 | 4   |
| 10 F46H5.3b | ARLGLTEFEAVK            | 46 | 2281   | 5.42 | 0.21 | 4   |
| 7 F46H5.3b  | GRGIFHNNQK              | 20 | 74499  | 5.47 | 0.16 | 3   |
| 7 F46H5.3b  | LQIRGIHGEHSESEGGVYDISNK | 18 | 5799   | 5.81 | 0.10 | 2   |
| 7 F46H5.3b  | GRGIFHNNQK              | 28 | 41635  | 6.60 | 0.15 | 2   |
| 7 F46H5.3b  | LQIRGIHGEHSESEGGVYDISNK | 28 | 6273   | 6.65 | 0.16 | 2   |
| 7 F46H5.3b  | QMYDGIAHLIALEK          | 67 | 3233   | 6.87 | 0.17 | 2   |
| 7 F46H5.3b  | QMYDGIAHLIALEK          | 65 | 2306   | 6.97 | 0.21 | 3   |
| 7 F46H5.3b  | LQIRGIHGEHSESEGGVYDISNK | 26 | 11650  | 7.00 | 0.20 | 3   |
| 22 F47B10.1 | ELAHEIAVK               | 13 | 1433   | 1.85 | 0.27 | 15  |
| 1 F47G6.4   | SQLSSLLDK               | 17 | 4310   | 0.75 | 0.13 | 18  |
| 1 F48E3.3   | FIDIVNK                 | 25 | 866    | 0.87 | 0.12 | 13  |
| 22 F48E3.3  | HGFEFVQK                | 16 | 1645   | 1.02 | 0.15 | 15  |
| 7 F48E3.3   | VLSTSSVDLLK             | 16 | 834    | 1.05 | 0.13 | 13  |
| 22 F48E3.3  | HGFEFVQK                | 14 | 2009   | 1.11 | 0.15 | 13  |
| 10 F48E3.3  | HSELPLK                 | 13 | 1766   | 1.40 | 0.08 | 6   |
| 7 F48E3.3   | HGFEFVQK                | 12 | 3803   | 1.45 | 0.28 | 19  |
| 10 F48E3.3  | HSELPLK                 | 14 | 2205   | 1.68 | 0.10 | 6   |
| 7 F48E3.3   | HGFEFVQK                | 11 | 1603   | 1.68 | 0.20 | 12  |
| 1 F48E3.3   | HGFEFVQK                | 27 | 1953   | 1.82 | 0.05 | 3   |
| 1 F48E3.3   | HGFEFVQK                | 18 | 1980   | 2.61 | 0.29 | 11  |
| 22 F48E3.3  | HGFEFVQK                | 12 | 4977   | 2.98 | 0.31 | 10  |
| 10 F48E8.3  | FLAAEAIRGK              | 35 | 6756   | 0.22 | 0.23 | 105 |
| 10 F48E8.3  | FLAAEAIRGK              | 47 | 6747   | 0.28 | 0.35 | 125 |
| 1 F48E8.3   | FLAAEAIRGK              | 55 | 5038   | 0.51 | 0.06 | 12  |
| 7 F48E8.3   | FLAAEAIRGK              | 16 | 2004   | 0.60 | 0.17 | 28  |
| 22 F48E8.3  | VSGIEIVTSASGEK          | 35 | 1428   | 0.62 | 0.28 | 46  |
| 10 F48E8.3  | VSGIEIVTSASGEK          | 46 | 1619   | 0.63 | 0.07 | 11  |
| 7 F48E8.3   | FLAAEAIRGK              | 27 | 1822   | 0.65 | 0.12 | 18  |
| 10 F48E8.3  | FLAAEAIRGK              | 27 | 4378   | 0.65 | 0.58 | 88  |
| 7 F48E8.3   | FLAAEAIRGK              | 37 | 5390   | 0.66 | 0.13 | 20  |
| 7 F48E8.3   | FLAAEAIRGK              | 21 | 4482   | 0.66 | 0.11 | 17  |
| 22 F48E8.3  | VSGIEIVTSASGEK          | 19 | 1499   | 0.68 | 0.16 | 23  |
| 22 F48E8.3  | MVGILRENGK              | 33 | 2358   | 0.85 | 0.12 | 15  |
| 1 F48E8.3   | FLAAEAIRGK              | 44 | 6654   | 0.87 | 0.10 | 11  |
| 7 F48E8.3   | FLAAEAIRGK              | 14 | 4861   | 0.88 | 0.08 | 10  |
| 7 F48E8.3   | FLAAEAIRGK              | 30 | 7056   | 0.89 | 0.10 | 11  |
| 7 F48E8.3   | MVGILRENGK              | 22 | 1453   | 0.89 | 0.20 | 22  |
| 1 F48E8.3   | FLAAEAIRGK              | 56 | 6411   | 0.89 | 0.12 | 13  |
| 10 F48E8.3  | VSGIEIVTSASGEK          | 27 | 1387   | 0.96 | 0.17 | 18  |
| 1 F48E8.3   | MVGILRENGK              | 46 | 1817   | 1.02 | 0.18 | 17  |
| 10 F48E8.3  | VSGIEIVTSASGEK          | 16 | 803    | 1.03 | 0.17 | 17  |
| 1 F48E8.3   | FLAAEAIRGK              | 40 | 4388   | 1.08 | 0.11 | 10  |
| 22 F48E8.3  | FLAAEAIRGK              | 39 | 7294   | 1.19 | 0.10 | 8   |
| 7 F48E8.3   | FLAAEAIRGK              | 18 | 1278   | 1.23 | 0.13 | 10  |

|             |                    |    |       |      |      |     |
|-------------|--------------------|----|-------|------|------|-----|
| 1 F48E8.3   | FLAAEAIRGK         | 35 | 3866  | 1.29 | 0.13 | 10  |
| 10 F48E8.3  | FLAAEAIRGK         | 46 | 8123  | 1.30 | 0.10 | 8   |
| 22 F48E8.3  | FLAAEAIRGK         | 31 | 5361  | 1.49 | 0.13 | 9   |
| 10 F48E8.3  | FLAAEAIRGK         | 45 | 6085  | 1.62 | 0.09 | 5   |
| 7 F48E8.3   | FLAAEAIRGK         | 27 | 1391  | 1.77 | 0.14 | 8   |
| 10 F48E8.5  | NLTPSTLTSEVKP LLEK | 28 | 2545  | 0.34 | 0.58 | 168 |
| 10 F48E8.5  | SELAGVIMGLAP LIGK  | 37 | 878   | 0.35 | 0.23 | 66  |
| 1 F48E8.5   | ELVTDGNQLVK        | 16 | 1457  | 0.40 | 0.28 | 71  |
| 10 F48E8.5  | DSDFDVRYFSEEAK     | 22 | 8307  | 0.41 | 0.10 | 24  |
| 10 F48E8.5  | DLVEDDVPNVRFNAAK   | 33 | 8047  | 0.42 | 0.10 | 24  |
| 10 F48E8.5  | DSDFDVRYFSEEAK     | 18 | 7274  | 0.46 | 0.21 | 45  |
| 10 F48E8.5  | DSDFDVRYFSEEAK     | 22 | 8532  | 0.50 | 0.24 | 48  |
| 10 F48E8.5  | DSDFDVRYFSEEAK     | 16 | 7538  | 0.54 | 0.20 | 37  |
| 22 F48E8.5  | SELAGVIMGLAP LIGK  | 33 | 1143  | 0.58 | 0.07 | 12  |
| 22 F48E8.5  | DSDFDVRYFSEEAK     | 17 | 6647  | 0.59 | 0.17 | 29  |
| 22 F48E8.5  | SELAGVIMGLAP LIGK  | 23 | 1070  | 0.62 | 0.10 | 16  |
| 22 F48E8.5  | DSDFDVRYFSEEAK     | 20 | 7289  | 0.68 | 0.23 | 34  |
| 10 F48E8.5  | DLVEDDVPNVRFNAAK   | 33 | 6225  | 0.73 | 0.13 | 18  |
| 22 F48E8.5  | SELAGVIMGLAP LIGK  | 13 | 1353  | 0.86 | 0.14 | 16  |
| 22 F48E8.5  | FGGQWASTNIVPK      | 11 | 1358  | 0.89 | 0.09 | 10  |
| 10 F48E8.5  | NLTPSTLTSEVKP LLEK | 38 | 2828  | 1.20 | 0.37 | 31  |
| 22 F48E8.6  | TARDLDDALHAK       | 20 | 2698  | 0.22 | 0.52 | 233 |
| 1 F48E8.6   | TARDLDDALHAK       | 10 | 1011  | 0.72 | 0.18 | 25  |
| 10 F48E8.6  | DFERFLYTAK         | 12 | 1330  | 0.72 | 0.10 | 14  |
| 10 F48E8.6  | GVL RINPK          | 13 | 1445  | 2.29 | 0.19 | 8   |
| 22 F49C12.8 | DGDILLNRIQK        | 11 | 8828  | 0.56 | 0.15 | 26  |
| 22 F49C12.8 | DGDILLNRIQK        | 17 | 6520  | 0.59 | 0.23 | 38  |
| 7 F49C12.8  | IVVDATQLAAMK       | 61 | 1408  | 0.59 | 0.18 | 30  |
| 22 F49C12.8 | IVVDATQLAAMK       | 21 | 933   | 0.74 | 0.15 | 21  |
| 7 F49C12.8  | IVVDATQLAAMK       | 37 | 1838  | 0.79 | 0.12 | 15  |
| 7 F49C12.8  | IVVDATQLAAMK       | 59 | 2466  | 0.84 | 0.10 | 11  |
| 22 F49C12.8 | IVVDATQLAAMK       | 37 | 1012  | 0.87 | 0.18 | 21  |
| 7 F49C12.8  | IVVDATQLAAMK       | 54 | 2346  | 1.14 | 0.07 | 6   |
| 22 F49C12.8 | IVVDATQLAAMK       | 24 | 1125  | 1.48 | 0.15 | 10  |
| 22 F49C12.8 | IVVDATQLAAMK       | 16 | 1293  | 1.72 | 0.24 | 14  |
| 22 F49E8.3a | LNILTIK            | 42 | 1995  | 0.10 | 0.36 | 344 |
| 10 F49E8.3a | FTQMFNDFLEK        | 36 | 1452  | 0.41 | 0.27 | 66  |
| 10 F49E8.3a | FVGELNDK           | 47 | 2560  | 0.58 | 0.24 | 41  |
| 10 F49E8.3a | FTQMFNDFLEK        | 40 | 1000  | 0.59 | 0.17 | 29  |
| 10 F49E8.3a | FTQMFNDFLEK        | 43 | 1319  | 0.62 | 0.25 | 40  |
| 22 F49E8.3a | LNILTIK            | 31 | 1210  | 0.64 | 0.12 | 19  |
| 10 F49E8.3a | LNILTIK            | 19 | 1491  | 0.65 | 0.10 | 15  |
| 10 F49E8.3a | FTQMFNDFLEK        | 27 | 698   | 0.66 | 0.18 | 27  |
| 10 F49E8.3a | FVGELNDK           | 61 | 3252  | 0.66 | 0.08 | 12  |
| 22 F49E8.3a | AVTFATSPK          | 20 | 1505  | 0.68 | 0.25 | 37  |
| 1 F49E8.3a  | LNILTIK            | 27 | 1002  | 0.68 | 0.15 | 21  |
| 22 F49E8.3a | GLRLYLK            | 12 | 835   | 0.68 | 0.29 | 43  |
| 22 F49E8.3a | LNILTIK            | 18 | 1635  | 0.70 | 0.06 | 9   |
| 10 F49E8.3a | FTQMFNDFLEK        | 29 | 840   | 0.71 | 0.18 | 25  |
| 22 F49E8.3a | AVTFATSPK          | 13 | 1929  | 0.77 | 0.13 | 17  |
| 10 F49E8.3a | LNILTIK            | 31 | 1815  | 0.77 | 0.13 | 17  |
| 1 F49E8.3a  | GLRLYLK            | 16 | 367   | 0.78 | 0.19 | 24  |
| 1 F49E8.3a  | GLRLYLK            | 13 | 1003  | 0.80 | 0.15 | 19  |
| 10 F49E8.3a | AVTFATSPK          | 24 | 4755  | 0.81 | 0.06 | 8   |
| 22 F49E8.3a | FTQMFNDFLEK        | 41 | 1323  | 0.84 | 0.16 | 19  |
| 22 F49E8.3a | LNILTIK            | 12 | 834   | 0.84 | 0.07 | 9   |
| 22 F49E8.3a | FTQMFNDFLEK        | 18 | 1039  | 0.87 | 0.19 | 22  |
| 10 F49E8.3a | GLRLYLK            | 25 | 1695  | 0.89 | 0.05 | 6   |
| 10 F49E8.3a | GLRLYLK            | 10 | 2058  | 0.91 | 0.05 | 5   |
| 22 F49E8.3a | AVTFATSPK          | 23 | 4628  | 1.00 | 0.04 | 4   |
| 1 F49E8.3a  | LNILTIK            | 20 | 642   | 1.05 | 0.10 | 9   |
| 10 F49E8.3a | LNILTIK            | 13 | 1166  | 1.06 | 0.13 | 12  |
| 1 F49E8.3a  | VQLDFK             | 13 | 620   | 1.07 | 0.20 | 19  |
| 22 F49E8.3a | LNILTIK            | 33 | 1346  | 1.09 | 0.20 | 18  |
| 10 F49E8.3a | AVTFATSPK          | 30 | 2373  | 1.15 | 0.06 | 5   |
| 10 F49E8.3a | LNILTIK            | 23 | 1129  | 1.16 | 0.11 | 10  |
| 22 F49E8.3a | LNILTIK            | 31 | 1596  | 1.24 | 0.08 | 6   |
| 10 F49E8.3a | VQLDFK             | 13 | 1275  | 1.25 | 0.16 | 13  |
| 22 F49E8.3a | GLRLYLK            | 11 | 3495  | 1.27 | 0.03 | 2   |
| 10 F49E8.3a | LNILTIK            | 24 | 1249  | 1.29 | 0.11 | 9   |
| 22 F49E8.3a | LNILTIK            | 11 | 1365  | 1.33 | 0.16 | 12  |
| 22 F49E8.3a | GLRLYLK            | 26 | 5570  | 1.33 | 0.09 | 7   |
| 22 F49E8.3a | FTQMFNDFLEK        | 29 | 1217  | 1.40 | 0.17 | 12  |
| 22 F49E8.3a | GLRLYLK            | 16 | 2423  | 1.41 | 0.16 | 11  |
| 10 F49E8.3a | AVTFATSPK          | 33 | 4165  | 1.45 | 0.06 | 4   |
| 10 F49E8.3a | GLRLYLK            | 11 | 2787  | 1.45 | 0.08 | 6   |
| 10 F49E8.3a | AVTFATSPK          | 35 | 4663  | 1.49 | 0.03 | 2   |
| 10 F49E8.3a | VQLDFK             | 18 | 1112  | 1.51 | 0.21 | 14  |
| 10 F49E8.3a | LNILTIK            | 20 | 1501  | 1.51 | 0.09 | 6   |
| 1 F49E8.3a  | GLRLYLK            | 21 | 1164  | 1.59 | 0.17 | 11  |
| 10 F49E8.3a | LNILTIK            | 14 | 727   | 1.62 | 0.15 | 9   |
| 22 F49E8.3a | GLRLYLK            | 16 | 2330  | 1.64 | 0.13 | 8   |
| 22 F49E8.3a | GLRLYLK            | 13 | 2194  | 1.77 | 0.06 | 4   |
| 10 F49E8.3a | GLRLYLK            | 18 | 7517  | 1.81 | 0.18 | 10  |
| 10 F49E8.3a | LNILTIK            | 23 | 1324  | 2.49 | 0.15 | 6   |
| 10 F49E8.3a | GLRLYLK            | 17 | 7486  | 2.56 | 0.19 | 8   |
| 10 F49E8.3a | LNILTIK            | 35 | 1282  | 3.36 | 0.14 | 4   |
| 10 F49E8.3a | GLRLYLK            | 15 | 1358  | 3.75 | 0.26 | 7   |
| 10 F52B10.1 | NVHELEK            | 32 | 2123  | 0.11 | 0.19 | 169 |
| 10 F52B10.1 | NVHELEK            | 19 | 1703  | 0.21 | 0.32 | 153 |
| 22 F52B10.1 | LLAELEDSK          | 11 | 383   | 0.30 | 0.22 | 75  |
| 10 F52B10.1 | LLAELEDSK          | 12 | 549   | 0.56 | 0.23 | 41  |
| 7 F52B10.1  | NLRDVEHLQK         | 12 | 1864  | 0.61 | 0.34 | 56  |
| 7 F52B10.1  | NLRDVEHLQK         | 13 | 3217  | 0.78 | 0.11 | 14  |
| 7 F52B10.1  | LLAELEDSK          | 20 | 564   | 0.79 | 0.26 | 33  |
| 10 F52B10.1 | NLRDVEHLQK         | 28 | 11574 | 0.81 | 0.06 | 7   |
| 10 F52B10.1 | GMFRTVSQ LHK       | 14 | 1512  | 0.81 | 0.32 | 39  |
| 22 F52B10.1 | RAIEQIQHTMEGK      | 17 | 873   | 1.02 | 0.13 | 13  |
| 10 F52B10.1 | NLRDVEHLQK         | 30 | 8301  | 1.03 | 0.13 | 13  |
| 22 F52B10.1 | LLAELEDSK          | 31 | 954   | 1.08 | 0.14 | 13  |
| 22 F52B10.1 | NLRDVEHLQK         | 18 | 4454  | 1.10 | 0.08 | 7   |

|                        |                     |     |       |       |      |     |
|------------------------|---------------------|-----|-------|-------|------|-----|
| 10 F52B10.1            | RAIEQIQHTMEGK       | 12  | 1490  | 1.14  | 0.19 | 17  |
| 10 F52B10.1            | GMFRTVSQ LHK        | 13  | 1239  | 1.23  | 0.14 | 11  |
| 22 F52B10.1            | NLRDVEHLQK          | 16  | 3869  | 1.25  | 0.08 | 6   |
| 22 F52B10.1            | NVHELEK             | 27  | 1718  | 1.29  | 0.14 | 11  |
| 1 F52B10.1             | GMFRTVSQ LHK        | 22  | 863   | 1.39  | 0.02 | 2   |
| 22 F52B10.1            | LLAELEDSK           | 19  | 711   | 1.82  | 0.08 | 4   |
| 10 F52B10.1            | GMFRTVSQ LHK        | 20  | 2178  | 1.97  | 0.11 | 5   |
| 22 F52B10.1            | LLAELEDSK           | 27  | 286   | 4.00  | 0.08 | 2   |
| 7 F52B11.2b;F52B11.2a  | HVENVLK             | 12  | 2891  | 0.30  | 0.33 | 110 |
| 22 F52B11.2b;F52B11.2a | ITEQLADHDK          | 29  | 1459  | 0.75  | 0.06 | 8   |
| 22 F52B11.2b;F52B11.2a | RVPLAIVGGSDFK       | 21  | 4042  | 0.87  | 0.09 | 10  |
| 22 F52B11.2b;F52B11.2a | ITEQLADHDK          | 20  | 1066  | 0.87  | 0.13 | 15  |
| 22 F52D1.1             | RYQPLEALVDREPAQQK   | 20  | 4264  | 0.05  | 0.28 | 584 |
| 22 F52D1.1             | ETLHFEAFK           | 24  | 2523  | 0.08  | 0.40 | 481 |
| 22 F52D1.1             | ELSIYLP GK          | 19  | 1662  | 0.11  | 0.11 | 104 |
| 22 F52D1.1             | DAFGKPEDMIK         | 30  | 2726  | 0.11  | 0.60 | 541 |
| 1 F52D1.1              | EVHDGFVK            | 32  | 1720  | 0.13  | 0.15 | 122 |
| 7 F52D1.1              | EVHDGFVK            | 31  | 2383  | 0.14  | 0.15 | 107 |
| 22 F52D1.1             | REHDYLHTITNK        | 14  | 2880  | 0.20  | 0.43 | 213 |
| 1 F52D1.1              | ETLHFEAFK           | 18  | 424   | 0.21  | 0.23 | 108 |
| 22 F52D1.1             | IVSSINAK            | 26  | 1403  | 0.26  | 0.27 | 105 |
| 22 F52D1.1             | ETLHFEAFK           | 23  | 1775  | 0.31  | 0.46 | 148 |
| 22 F52D1.1             | RQVWYDWETHK         | 44  | 2454  | 0.31  | 0.43 | 138 |
| 10 F52D1.1             | EVHDGFVK            | 14  | 4268  | 0.32  | 0.18 | 56  |
| 7 F52D1.1              | ELSIYLP GK          | 16  | 1987  | 0.32  | 0.25 | 76  |
| 22 F52D1.1             | ELSIYLP GK          | 29  | 1169  | 0.34  | 0.45 | 132 |
| 10 F52D1.1             | EVHDGFVK            | 21  | 4363  | 0.42  | 0.12 | 28  |
| 7 F52D1.1              | ETLHFEAFK           | 18  | 1582  | 0.43  | 0.10 | 24  |
| 10 F52D1.1             | VLLSDREK            | 15  | 2758  | 0.44  | 0.23 | 52  |
| 22 F52D1.1             | VLLSDREK            | 24  | 2318  | 0.47  | 0.45 | 97  |
| 1 F52D1.1              | IVSSINAK            | 15  | 1009  | 0.47  | 0.20 | 43  |
| 1 F52D1.1              | LVTIVDPHIK          | 24  | 632   | 0.48  | 0.27 | 56  |
| 7 F52D1.1              | ELSIYLP GK          | 25  | 1901  | 0.50  | 0.22 | 45  |
| 1 F52D1.1              | DSTVRVVIDENDGALRK   | 12  | 714   | 0.51  | 0.20 | 39  |
| 7 F52D1.1              | ETLHFEAFK           | 27  | 1996  | 0.51  | 0.13 | 25  |
| 7 F52D1.1              | RYQPLEALVDREPAQQK   | 13  | 3598  | 0.52  | 0.21 | 41  |
| 7 F52D1.1              | RHRAVTSPTGYEVVGDSVK | 18  | 3737  | 0.52  | 0.11 | 22  |
| 7 F52D1.1              | LVTIVDPHIK          | 15  | 1516  | 0.53  | 0.10 | 20  |
| 10 F52D1.1             | GFWEETFK            | 13  | 862   | 0.55  | 0.18 | 32  |
| 1 F52D1.1              | AYFTFDK             | 13  | 591   | 0.56  | 0.09 | 15  |
| 1 F52D1.1              | ETLHFEAFK           | 22  | 944   | 0.59  | 0.20 | 34  |
| 10 F52D1.1             | ADWAHLK             | 21  | 2497  | 0.62  | 0.26 | 42  |
| 1 F52D1.1              | ETLHFEAFK           | 15  | 786   | 0.70  | 0.17 | 24  |
| 10 F52D1.1             | AYFTFDK             | 11  | 711   | 0.72  | 0.20 | 27  |
| 1 F52D1.1              | IVSSINAK            | 10  | 669   | 0.74  | 0.23 | 31  |
| 10 F52D1.1             | ADWAHLK             | 20  | 3210  | 0.76  | 0.24 | 32  |
| 1 F52D1.1              | RYQPLEALVDREPAQQK   | 18  | 1998  | 0.92  | 0.09 | 9   |
| 1 F52D1.1              | AYFTFDK             | 16  | 680   | 0.96  | 0.09 | 9   |
| 10 F52D1.1             | ETLHFEAFK           | 45  | 5970  | 1.01  | 0.10 | 10  |
| 1 F52D1.1              | ELSIYLP GK          | 13  | 620   | 1.06  | 0.13 | 12  |
| 10 F52D1.1             | RQVWYDWETHK         | 24  | 3822  | 1.12  | 0.13 | 11  |
| 10 F52D1.1             | ETLHFEAFK           | 34  | 5669  | 1.15  | 0.04 | 4   |
| 1 F52D1.1              | VLLSDREK            | 19  | 508   | 1.16  | 0.34 | 29  |
| 10 F52D1.1             | RQVWYDWETHK         | 17  | 3558  | 1.17  | 0.17 | 14  |
| 22 F52D1.1             | VLLSDREK            | 31  | 1922  | 1.19  | 0.49 | 41  |
| 10 F52D1.1             | RQVWYDWETHK         | 20  | 3517  | 1.20  | 0.08 | 7   |
| 1 F52D1.1              | RYQPLEALVDREPAQQK   | 13  | 1763  | 1.24  | 0.13 | 10  |
| 10 F52D1.1             | IVSSINAK            | 31  | 2053  | 1.29  | 0.10 | 8   |
| 10 F52D1.1             | IVSSINAK            | 39  | 2484  | 1.39  | 0.25 | 18  |
| 10 F52D1.1             | ELSIYLP GK          | 15  | 830   | 1.41  | 0.08 | 6   |
| 10 F52D1.1             | LVTIVDPHIK          | 19  | 1674  | 1.58  | 0.07 | 4   |
| 10 F52D1.1             | RYQPLEALVDREPAQQK   | 15  | 4542  | 1.59  | 0.11 | 7   |
| 10 F52D1.1             | RQVWYDWETHK         | 19  | 3012  | 1.63  | 0.11 | 6   |
| 10 F52D1.1             | RHRAVTSPTGYEVVGDSVK | 11  | 10854 | 1.75  | 0.24 | 14  |
| 10 F52D1.1             | LVTIVDPHIK          | 21  | 2230  | 1.99  | 0.18 | 9   |
| 22 F52D1.1             | IVSSINAK            | 11  | 716   | 2.00  | 0.29 | 14  |
| 22 F52D1.1             | RHRAVTSPTGYEVVGDSVK | 20  | 2446  | 2.12  | 0.53 | 25  |
| 22 F52D1.1             | GFWEETFK            | 21  | 1129  | 2.48  | 0.31 | 13  |
| 22 F52D1.1             | RQVWYDWETHK         | 15  | 2147  | 3.53  | 0.16 | 5   |
| 22 F52D1.1             | GFWEETFK            | 14  | 765   | 3.65  | 0.41 | 11  |
| 22 F52D1.1             | REHDYLHTITNK        | 16  | 2756  | 3.82  | 0.23 | 6   |
| 22 F52D1.1             | IVSSINAK            | 17  | 1287  | 4.67  | 0.27 | 6   |
| 22 F52D1.1             | ADWAHLK             | 24  | 2440  | 5.12  | 0.04 | 1   |
| 22 F52D1.1             | RQVWYDWETHK         | 24  | 2715  | 5.79  | 0.26 | 4   |
| 22 F52D1.1             | EVHDGFVK            | 21  | 4224  | 6.47  | 0.30 | 5   |
| 22 F52D1.1             | ELSIYLP GK          | 28  | 3420  | 11.44 | 0.19 | 2   |
| 22 F52D1.1             | RHRAVTSPTGYEVVGDSVK | 16  | 12171 | 11.57 | 0.20 | 2   |
| 22 F52D1.1             | ELSIYLP GK          | 30  | 2235  | 11.84 | 0.24 | 2   |
| 22 F52D10.3a;F52D10.3b | EELVNR AK           | 32  | 11214 | 0.35  | 0.21 | 59  |
| 22 F52D10.3a;F52D10.3b | LAEQAERYDDMAASMK    | 48  | 7638  | 0.49  | 0.28 | 57  |
| 22 F52D10.3a;F52D10.3b | LAEQAERYDDMAASMK    | 44  | 6602  | 0.58  | 0.25 | 44  |
| 10 F52D10.3a;F52D10.3b | LAEQAERYDDMAASMK    | 26  | 5415  | 0.65  | 0.16 | 25  |
| 10 F52D10.3a;F52D10.3b | FLIPK               | 18  | 3866  | 0.67  | 0.09 | 14  |
| 10 F52D10.3a;F52D10.3b | LAEQAERYDDMAASMK    | 36  | 5085  | 0.68  | 0.21 | 30  |
| 22 F52D10.3a;F52D10.3b | FLIPK               | 22  | 1593  | 0.72  | 0.17 | 23  |
| 10 F52D10.3a;F52D10.3b | EELVNR AK           | 23  | 30442 | 0.76  | 0.09 | 12  |
| 10 F52D10.3a;F52D10.3b | QAFDDAIAELDTLNEDSYK | 106 | 2225  | 0.77  | 0.11 | 14  |
| 22 F52D10.3a;F52D10.3b | LAEQAERYDDMAASMK    | 33  | 1909  | 0.77  | 0.09 | 12  |
| 22 F52D10.3a;F52D10.3b | LAEQAERYDDMAASMK    | 12  | 1389  | 0.79  | 0.23 | 29  |
| 22 F52D10.3a;F52D10.3b | LAEQAERYDDMAASMK    | 37  | 3012  | 0.79  | 0.22 | 27  |
| 10 F52D10.3a;F52D10.3b | QAFDDAIAELDTLNEDSYK | 82  | 2497  | 0.80  | 0.17 | 21  |
| 10 F52D10.3a;F52D10.3b | EELVNR AK           | 27  | 34558 | 0.81  | 0.11 | 14  |
| 10 F52D10.3a;F52D10.3b | VFYLK               | 11  | 2450  | 0.82  | 0.15 | 18  |
| 1 F52D10.3a;F52D10.3b  | LAEQAERYDDMAASMK    | 30  | 2270  | 0.83  | 0.11 | 14  |
| 10 F52D10.3a;F52D10.3b | FLIPK               | 12  | 2068  | 0.83  | 0.14 | 17  |
| 22 F52D10.3a;F52D10.3b | FLIPK               | 24  | 64222 | 0.84  | 0.04 | 5   |
| 10 F52D10.3a;F52D10.3b | FLIPK               | 38  | 81903 | 0.89  | 0.03 | 4   |
| 1 F52D10.3a;F52D10.3b  | LAEQAERYDDMAASMK    | 13  | 2362  | 0.90  | 0.18 | 20  |
| 22 F52D10.3a;F52D10.3b | LAEQAERYDDMAASMK    | 25  | 2136  | 0.92  | 0.24 | 26  |
| 10 F52D10.3a;F52D10.3b | LAEQAERYDDMAASMK    | 48  | 14804 | 0.93  | 0.09 | 10  |
| 22 F52D10.3a;F52D10.3b | FLIPK               | 24  | 60025 | 0.94  | 0.06 | 6   |

|                        |                        |     |       |      |      |     |
|------------------------|------------------------|-----|-------|------|------|-----|
| 1 F52D10.3a;F52D10.3b  | FLIPK                  | 38  | 49898 | 0.96 | 0.03 | 3   |
| 1 F52D10.3a;F52D10.3b  | SQQSYQEAFDIAK          | 91  | 54397 | 0.98 | 0.07 | 7   |
| 1 F52D10.3a;F52D10.3b  | FLIPK                  | 33  | 44773 | 1.00 | 0.06 | 6   |
| 22 F52D10.3a;F52D10.3b | LAEQAERYDDMAASMK       | 46  | 2729  | 1.02 | 0.12 | 12  |
| 10 F52D10.3a;F52D10.3b | SQQSYQEAFDIAK          | 41  | 6538  | 1.02 | 0.11 | 11  |
| 10 F52D10.3a;F52D10.3b | FLIPK                  | 38  | 75352 | 1.03 | 0.06 | 5   |
| 22 F52D10.3a;F52D10.3b | FLIPK                  | 23  | 53322 | 1.05 | 0.06 | 5   |
| 1 F52D10.3a;F52D10.3b  | EELVNRK                | 28  | 10269 | 1.06 | 0.07 | 7   |
| 22 F52D10.3a;F52D10.3b | SQQSYQEAFDIAK          | 102 | 44582 | 1.08 | 0.09 | 8   |
| 10 F52D10.3a;F52D10.3b | FLIPK                  | 18  | 81340 | 1.08 | 0.02 | 2   |
| 10 F52D10.3a;F52D10.3b | SQQSYQEAFDIAK          | 115 | 15805 | 1.09 | 0.10 | 10  |
| 22 F52D10.3a;F52D10.3b | SQQSYQEAFDIAK          | 90  | 36454 | 1.14 | 0.06 | 5   |
| 1 F52D10.3a;F52D10.3b  | FLIPK                  | 38  | 35573 | 1.16 | 0.03 | 3   |
| 22 F52D10.3a;F52D10.3b | FLIPK                  | 23  | 48362 | 1.18 | 0.03 | 3   |
| 10 F52D10.3a;F52D10.3b | SQQSYQEAFDIAK          | 94  | 22629 | 1.18 | 0.09 | 7   |
| 1 F52D10.3a;F52D10.3b  | SQQSYQEAFDIAK          | 109 | 61293 | 1.18 | 0.04 | 4   |
| 10 F52D10.3a;F52D10.3b | FLIPK                  | 37  | 69802 | 1.19 | 0.05 | 4   |
| 10 F52D10.3a;F52D10.3b | SQQSYQEAFDIAK          | 11  | 5151  | 1.20 | 0.13 | 11  |
| 10 F52D10.3a;F52D10.3b | LAEQAERYDDMAASMK       | 45  | 10916 | 1.21 | 0.16 | 13  |
| 1 F52D10.3a;F52D10.3b  | LAEQAERYDDMAASMK       | 11  | 4428  | 1.22 | 0.11 | 9   |
| 10 F52D10.3a;F52D10.3b | FLIPK                  | 32  | 70669 | 1.23 | 0.07 | 6   |
| 1 F52D10.3a;F52D10.3b  | GDYYRYLAEVASGDDRNSVVEK | 14  | 4210  | 1.26 | 0.24 | 19  |
| 22 F52D10.3a;F52D10.3b | EELVNRK                | 30  | 12861 | 1.30 | 0.07 | 5   |
| 10 F52D10.3a;F52D10.3b | FLIPK                  | 14  | 57794 | 1.30 | 0.04 | 3   |
| 10 F52D10.3a;F52D10.3b | GDYYRYLAEVASGDDRNSVVEK | 12  | 24554 | 1.31 | 0.19 | 14  |
| 1 F52D10.3a;F52D10.3b  | FLIPK                  | 12  | 25424 | 1.39 | 0.08 | 6   |
| 22 F52D10.3a;F52D10.3b | SQQSYQEAFDIAK          | 16  | 3915  | 1.45 | 0.10 | 7   |
| 10 F52D10.3a;F52D10.3b | FLIPK                  | 10  | 39859 | 1.46 | 0.06 | 4   |
| 7 F52D10.3a;F52D10.3b  | FLIPK                  | 38  | 27639 | 1.47 | 0.07 | 5   |
| 1 F52D10.3a;F52D10.3b  | FLIPK                  | 11  | 21256 | 1.48 | 0.05 | 3   |
| 22 F52D10.3a;F52D10.3b | SQQSYQEAFDIAK          | 20  | 3620  | 1.50 | 0.21 | 14  |
| 7 F52D10.3a;F52D10.3b  | LAEQAERYDDMAASMK       | 18  | 5705  | 1.52 | 0.17 | 11  |
| 7 F52D10.3a;F52D10.3b  | SQQSYQEAFDIAK          | 11  | 2768  | 1.53 | 0.17 | 11  |
| 7 F52D10.3a;F52D10.3b  | SQQSYQEAFDIAK          | 97  | 8812  | 1.53 | 0.11 | 7   |
| 1 F52D10.3a;F52D10.3b  | SQQSYQEAFDIAK          | 50  | 2502  | 1.54 | 0.12 | 8   |
| 22 F52D10.3a;F52D10.3b | LAEQAERYDDMAASMK       | 11  | 2828  | 1.54 | 0.23 | 15  |
| 7 F52D10.3a;F52D10.3b  | FLIPK                  | 37  | 19945 | 1.56 | 0.12 | 7   |
| 7 F52D10.3a;F52D10.3b  | FLIPK                  | 35  | 20099 | 1.58 | 0.05 | 3   |
| 10 F52D10.3a;F52D10.3b | GDYYRYLAEVASGDDRNSVVEK | 12  | 19630 | 1.62 | 0.13 | 8   |
| 10 F52D10.3a;F52D10.3b | FLIPK                  | 13  | 52159 | 1.62 | 0.05 | 3   |
| 22 F52D10.3a;F52D10.3b | FLIPK                  | 10  | 28366 | 1.62 | 0.08 | 5   |
| 22 F52D10.3a;F52D10.3b | SQQSYQEAFDIAK          | 26  | 3402  | 1.63 | 0.20 | 13  |
| 7 F52D10.3a;F52D10.3b  | FLIPK                  | 11  | 13198 | 1.64 | 0.03 | 2   |
| 7 F52D10.3a;F52D10.3b  | EELVNRK                | 19  | 6381  | 1.64 | 0.08 | 5   |
| 1 F52D10.3a;F52D10.3b  | SQQSYQEAFDIAK          | 64  | 4720  | 1.66 | 0.16 | 10  |
| 7 F52D10.3a;F52D10.3b  | SQQSYQEAFDIAK          | 100 | 7118  | 1.67 | 0.12 | 7   |
| 7 F52D10.3a;F52D10.3b  | FLIPK                  | 20  | 8526  | 1.70 | 0.10 | 6   |
| 10 F52D10.3a;F52D10.3b | SQQSYQEAFDIAK          | 56  | 4071  | 1.77 | 0.11 | 6   |
| 10 F52D10.3a;F52D10.3b | SQQSYQEAFDIAK          | 96  | 8206  | 1.77 | 0.10 | 6   |
| 7 F52D10.3a;F52D10.3b  | GDYYRYLAEVASGDDRNSVVEK | 13  | 3494  | 1.78 | 0.15 | 9   |
| 7 F52D10.3a;F52D10.3b  | FLIPK                  | 14  | 12200 | 1.81 | 0.10 | 6   |
| 7 F52D10.3a;F52D10.3b  | SQQSYQEAFDIAK          | 11  | 2614  | 1.85 | 0.15 | 8   |
| 22 F52D10.3a;F52D10.3b | SQQSYQEAFDIAK          | 54  | 2952  | 1.87 | 0.09 | 5   |
| 22 F52D10.3a;F52D10.3b | SQQSYQEAFDIAK          | 90  | 4990  | 1.89 | 0.15 | 8   |
| 22 F52D10.3a;F52D10.3b | GDYYRYLAEVASGDDRNSVVEK | 23  | 7432  | 1.92 | 0.15 | 8   |
| 22 F52D10.3a;F52D10.3b | EELVNRK                | 24  | 8883  | 1.96 | 0.12 | 6   |
| 1 F52D10.3a;F52D10.3b  | FLIPK                  | 10  | 12358 | 2.02 | 0.09 | 4   |
| 22 F52D10.3a;F52D10.3b | GDYYRYLAEVASGDDRNSVVEK | 30  | 11418 | 2.05 | 0.14 | 7   |
| 7 F52D10.3a;F52D10.3b  | EELVNRK                | 12  | 3340  | 2.24 | 0.07 | 3   |
| 10 F52D10.3a;F52D10.3b | ELRDIQCQVNLNLLDK       | 37  | 2778  | 6.01 | 0.09 | 1   |
| 22 F52E4.1a;F52E4.1b   | ITIITRK                | 35  | 16036 | 0.22 | 0.13 | 62  |
| 22 F52E4.1a;F52E4.1b   | AFGGAYDVMSSK           | 30  | 1170  | 0.31 | 0.17 | 55  |
| 22 F52E4.1a;F52E4.1b   | ITIITRK                | 33  | 14245 | 0.32 | 0.41 | 130 |
| 22 F52E4.1a;F52E4.1b   | DVVHALVDEGDFEIMPDYAK   | 33  | 2071  | 0.32 | 0.31 | 98  |
| 7 F52E4.1a;F52E4.1b    | ITIITRK                | 28  | 12826 | 0.38 | 0.06 | 15  |
| 22 F52E4.1a;F52E4.1b   | DVVHALVDEGDFEIMPDYAK   | 28  | 2297  | 0.40 | 0.15 | 38  |
| 22 F52E4.1a;F52E4.1b   | AVTNEEVTQEELGGAK       | 107 | 6220  | 0.46 | 0.15 | 31  |
| 22 F52E4.1a;F52E4.1b   | ITIITRK                | 37  | 4850  | 0.47 | 0.13 | 27  |
| 22 F52E4.1a;F52E4.1b   | ITIITRK                | 40  | 4296  | 0.52 | 0.31 | 60  |
| 22 F52E4.1a;F52E4.1b   | GAVSILFRNDK            | 31  | 1395  | 0.54 | 0.45 | 84  |
| 22 F52E4.1a;F52E4.1b   | LLYAFAEATVPK           | 34  | 864   | 0.56 | 0.25 | 45  |
| 7 F52E4.1a;F52E4.1b    | LLYAFAEATVPK           | 41  | 1162  | 0.63 | 0.20 | 31  |
| 7 F52E4.1a;F52E4.1b    | LLYAFAEATVPK           | 25  | 1472  | 0.71 | 0.12 | 17  |
| 7 F52E4.1a;F52E4.1b    | FAAGCLDINSSVK          | 30  | 1664  | 0.87 | 0.14 | 17  |
| 7 F52E4.1a;F52E4.1b    | AFGGAYDVMSSK           | 35  | 6141  | 0.88 | 0.08 | 9   |
| 7 F52E4.1a;F52E4.1b    | DVVHALVDEGDFEIMPDYAK   | 32  | 2080  | 0.91 | 0.04 | 5   |
| 7 F52E4.1a;F52E4.1b    | DVVHALVDEGDFEIMPDYAK   | 30  | 2346  | 0.94 | 0.10 | 11  |
| 22 F52E4.1a;F52E4.1b   | LLYAFAEATVPK           | 15  | 704   | 0.98 | 0.14 | 14  |
| 7 F52E4.1a;F52E4.1b    | LLYAFAEATVPK           | 17  | 1217  | 0.99 | 0.16 | 16  |
| 7 F52E4.1a;F52E4.1b    | FAAGCLDINSSVK          | 30  | 1423  | 1.03 | 0.15 | 15  |
| 7 F52E4.1a;F52E4.1b    | GAVSILFRNDK            | 14  | 6395  | 1.13 | 0.09 | 8   |
| 7 F52E4.1a;F52E4.1b    | LLYAFAEATVPK           | 36  | 1048  | 1.16 | 0.25 | 22  |
| 7 F52E4.1a;F52E4.1b    | AFGGAYDVMSSK           | 12  | 2911  | 1.18 | 0.16 | 13  |
| 7 F52E4.1a;F52E4.1b    | AFGGAYDVMSSK           | 12  | 1128  | 1.18 | 0.07 | 6   |
| 22 F52E4.1a;F52E4.1b   | GAVSILFRNDK            | 24  | 2049  | 1.21 | 0.14 | 12  |
| 7 F52E4.1a;F52E4.1b    | ITIITRK                | 33  | 2339  | 1.44 | 0.11 | 8   |
| 7 F52E4.1a;F52E4.1b    | ITIITRK                | 15  | 5428  | 1.55 | 0.12 | 8   |
| 7 F52E4.1a;F52E4.1b    | GAVSILFRNDK            | 15  | 1634  | 1.55 | 0.11 | 7   |
| 22 F52E4.1a;F52E4.1b   | ITIITRK                | 13  | 14398 | 1.60 | 0.11 | 7   |
| 22 F52E4.1a;F52E4.1b   | ITIITRK                | 19  | 13909 | 1.89 | 0.08 | 4   |
| 22 F52E4.1a;F52E4.1b   | GAVSILFRNDK            | 19  | 1237  | 2.16 | 0.07 | 3   |
| 7 F52E4.1a;F52E4.1b    | ITIITRK                | 22  | 6985  | 2.20 | 0.11 | 5   |
| 7 F52E4.1a;F52E4.1b    | GAVSILFRNDK            | 13  | 2372  | 2.31 | 0.16 | 7   |
| 7 F52E4.1a;F52E4.1b    | GAVSILFRNDK            | 12  | 2933  | 2.42 | 0.24 | 10  |
| 22 F52E4.1a;F52E4.1b   | LLYAFAEATVPK           | 18  | 796   | 2.46 | 0.08 | 3   |
| 7 F52E4.1a;F52E4.1b    | ITIITRK                | 17  | 5828  | 3.67 | 0.06 | 2   |
| 7 F52E4.1a;F52E4.1b    | ITIITRK                | 18  | 4628  | 4.21 | 0.08 | 2   |
| 10 F52E4.1b;F52E4.1a   | AVTNEEVTQEELGGAK       | 91  | 4785  | 0.15 | 0.31 | 201 |
| 10 F52E4.1b;F52E4.1a   | ITIITRK                | 29  | 3719  | 0.46 | 0.37 | 80  |
| 10 F52E4.1b;F52E4.1a   | ITIITRK                | 28  | 3930  | 0.48 | 0.42 | 87  |
| 1 F52E4.1b;F52E4.1a    | ITIITRK                | 39  | 7298  | 0.60 | 0.07 | 11  |

|                      |                        |     |       |      |      |    |
|----------------------|------------------------|-----|-------|------|------|----|
| 1 F52E4.1b;F52E4.1a  | ITIITRK                | 40  | 5386  | 0.61 | 0.11 | 17 |
| 10 F52E4.1b;F52E4.1a | ITIITRK                | 24  | 5206  | 0.65 | 0.31 | 48 |
| 10 F52E4.1b;F52E4.1a | ITIITRK                | 19  | 2281  | 0.85 | 0.17 | 20 |
| 10 F52E4.1b;F52E4.1a | ITIITRK                | 48  | 8125  | 0.89 | 0.07 | 8  |
| 10 F52E4.1b;F52E4.1a | ITIITRK                | 41  | 7064  | 1.01 | 0.14 | 14 |
| 10 F52E4.1b;F52E4.1a | ITIITRK                | 33  | 15205 | 1.03 | 0.09 | 8  |
| 10 F52E4.1b;F52E4.1a | LLYAF AEATVPK          | 39  | 1004  | 1.04 | 0.19 | 19 |
| 1 F52E4.1b;F52E4.1a  | AFGGAYDVMSSK           | 33  | 3610  | 1.10 | 0.14 | 13 |
| 10 F52E4.1b;F52E4.1a | AFGGAYDVMSSK           | 22  | 2536  | 1.16 | 0.16 | 14 |
| 10 F52E4.1b;F52E4.1a | ITIITRK                | 31  | 11043 | 1.18 | 0.15 | 12 |
| 10 F52E4.1b;F52E4.1a | GAVSILFRNDK            | 13  | 1738  | 1.21 | 0.15 | 12 |
| 1 F52E4.1b;F52E4.1a  | ITIITRK                | 19  | 1190  | 1.28 | 0.59 | 46 |
| 10 F52E4.1b;F52E4.1a | AFGGAYDVMSSK           | 31  | 3108  | 1.44 | 0.25 | 18 |
| 10 F52E4.1b;F52E4.1a | ITIITRK                | 28  | 15503 | 1.73 | 0.16 | 9  |
| 1 F52E4.1b;F52E4.1a  | ITIITRK                | 26  | 7464  | 1.83 | 0.11 | 6  |
| 1 F52E4.1b;F52E4.1a  | GAVSILFRNDK            | 28  | 1225  | 1.91 | 0.43 | 22 |
| 10 F52E4.1b;F52E4.1a | GAVSILFRNDK            | 25  | 1897  | 1.93 | 0.09 | 4  |
| 1 F52E4.1b;F52E4.1a  | GAVSILFRNDK            | 20  | 1318  | 2.06 | 0.04 | 2  |
| 1 F52E4.1b;F52E4.1a  | ITIITRK                | 35  | 7489  | 2.17 | 0.08 | 4  |
| 10 F52E4.1b;F52E4.1a | GAVSILFRNDK            | 19  | 2515  | 2.30 | 0.16 | 7  |
| 10 F52E4.1b;F52E4.1a | ITIITRK                | 15  | 14648 | 2.61 | 0.07 | 3  |
| 1 F52E4.1b;F52E4.1a  | ITIITRK                | 28  | 13897 | 2.83 | 0.23 | 8  |
| 1 F52E4.1b;F52E4.1a  | ITIITRK                | 32  | 10555 | 3.84 | 0.14 | 4  |
| 10 F52H3.7a          | FQIFVDQK               | 10  | 1372  | 0.65 | 0.27 | 42 |
| 10 F52H3.7a          | LVFN TFSK              | 16  | 1191  | 0.66 | 0.23 | 35 |
| 10 F52H3.7a          | TLTVFGIPEK             | 26  | 3597  | 0.76 | 0.12 | 15 |
| 10 F52H3.7a          | FQIFVDQK               | 40  | 2427  | 0.89 | 0.17 | 19 |
| 22 F52H3.7a          | LVEPFEPGQTLIVK         | 14  | 808   | 1.05 | 0.29 | 28 |
| 10 F52H3.7a          | TLTVFGIPEK             | 28  | 3814  | 1.31 | 0.06 | 5  |
| 10 F52H3.7a          | FQIFVDQK               | 38  | 2128  | 1.31 | 0.08 | 6  |
| 22 F52H3.7a          | TLTVFGIPEK             | 10  | 1312  | 1.31 | 0.19 | 14 |
| 10 F52H3.7a          | RFHINLLK               | 16  | 1237  | 1.66 | 0.08 | 5  |
| 22 F52H3.7a          | TLTVFGIPEK             | 20  | 1249  | 1.78 | 0.16 | 9  |
| 1 F52H3.7a;F52H3.7b  | FQIFVDQK               | 17  | 883   | 0.85 | 0.14 | 17 |
| 1 F52H3.7a;F52H3.7b  | TLTVFGIPEK             | 20  | 1168  | 1.05 | 0.16 | 15 |
| 1 F52H3.7a;F52H3.7b  | TLTVFGIPEK             | 12  | 1844  | 1.09 | 0.07 | 6  |
| 1 F53A2.4            | IPIAAGFAIK             | 11  | 894   | 1.15 | 0.11 | 10 |
| 7 F53A2.4            | IPIAAGFAIK             | 14  | 1517  | 1.32 | 0.14 | 11 |
| 7 F53A2.6a           | LSLHSSDAPVAEK          | 19  | 3499  | 0.88 | 0.09 | 10 |
| 22 F53A2.7           | GLSATDLGVVASQAALK      | 121 | 7802  | 0.20 | 0.16 | 81 |
| 22 F53A2.7           | GLSATDLGVVASQAALK      | 127 | 6933  | 0.32 | 0.25 | 78 |
| 10 F53A2.7           | VTRQEAD EFALRSQTLWK    | 20  | 7288  | 0.50 | 0.11 | 22 |
| 7 F53A2.7            | NEIVGITIK              | 18  | 2066  | 0.58 | 0.12 | 20 |
| 22 F53A2.7           | NEIVGITIK              | 36  | 2894  | 0.59 | 0.23 | 39 |
| 22 F53A2.7           | NEIVGITIK              | 29  | 3753  | 0.59 | 0.30 | 51 |
| 10 F53A2.7           | VTRQEAD EFALRSQTLWK    | 12  | 5872  | 0.60 | 0.12 | 20 |
| 10 F53A2.7           | NEIVGITIK              | 17  | 1544  | 0.63 | 0.08 | 13 |
| 22 F53A2.7           | NEIVGITIK              | 38  | 3160  | 0.66 | 0.11 | 16 |
| 1 F53A2.7            | NEIVGITIK              | 31  | 1088  | 0.69 | 0.15 | 21 |
| 10 F53A2.7           | NEIVGITIK              | 30  | 3205  | 0.71 | 0.24 | 34 |
| 22 F53A2.7           | NEIVGITIK              | 25  | 828   | 0.72 | 0.06 | 8  |
| 1 F53A2.7            | GLSATDLGVVASQAALK      | 118 | 3551  | 0.74 | 0.13 | 17 |
| 22 F53A2.7           | NEIVGITIK              | 28  | 2770  | 0.76 | 0.07 | 9  |
| 10 F53A2.7           | GEESFEIDEHPRATT AESLAK | 22  | 8730  | 0.78 | 0.14 | 18 |
| 1 F53A2.7            | GLSATDLGVVASQAALK      | 91  | 1485  | 0.80 | 0.11 | 13 |
| 22 F53A2.7           | GEESFEIDEHPRATT AESLAK | 21  | 16484 | 0.80 | 0.13 | 16 |
| 22 F53A2.7           | NEIVGITIK              | 44  | 5893  | 0.80 | 0.12 | 15 |
| 7 F53A2.7            | NEIVGITIK              | 45  | 3523  | 0.80 | 0.10 | 13 |
| 1 F53A2.7            | NEIVGITIK              | 12  | 804   | 0.81 | 0.13 | 17 |
| 22 F53A2.7           | GEESFEIDEHPRATT AESLAK | 12  | 11335 | 0.85 | 0.12 | 14 |
| 7 F53A2.7            | NEIVGITIK              | 36  | 3166  | 0.87 | 0.10 | 11 |
| 22 F53A2.7           | NEIVGITIK              | 35  | 3287  | 0.89 | 0.09 | 11 |
| 22 F53A2.7           | GLSATDLGVVASQAALK      | 91  | 11001 | 0.91 | 0.07 | 8  |
| 1 F53A2.7            | GLSATDLGVVASQAALK      | 99  | 4251  | 0.91 | 0.07 | 7  |
| 1 F53A2.7            | RTAFGTFGGK             | 29  | 2002  | 0.93 | 0.16 | 18 |
| 22 F53A2.7           | NEIVGITIK              | 32  | 6166  | 0.93 | 0.08 | 8  |
| 1 F53A2.7            | NEIVGITIK              | 30  | 2255  | 0.94 | 0.12 | 13 |
| 10 F53A2.7           | NEIVGITIK              | 15  | 3415  | 0.96 | 0.07 | 7  |
| 10 F53A2.7           | NEIVGITIK              | 18  | 2815  | 0.96 | 0.08 | 8  |
| 7 F53A2.7            | NEIVGITIK              | 26  | 2306  | 0.98 | 0.22 | 23 |
| 22 F53A2.7           | NEIVGITIK              | 28  | 2888  | 0.99 | 0.13 | 13 |
| 22 F53A2.7           | GLSATDLGVVASQAALK      | 93  | 7347  | 1.00 | 0.07 | 7  |
| 22 F53A2.7           | RTAFGTFGGK             | 20  | 10344 | 1.01 | 0.20 | 20 |
| 10 F53A2.7           | GLSATDLGVVASQAALK      | 122 | 13651 | 1.03 | 0.09 | 9  |
| 10 F53A2.7           | GLSATDLGVVASQAALK      | 125 | 10547 | 1.08 | 0.07 | 6  |
| 7 F53A2.7            | NEIVGITIK              | 36  | 3371  | 1.09 | 0.06 | 6  |
| 22 F53A2.7           | GEESFEIDEHPRATT AESLAK | 18  | 13122 | 1.10 | 0.09 | 9  |
| 7 F53A2.7            | GLSATDLGVVASQAALK      | 62  | 3511  | 1.16 | 0.13 | 11 |
| 1 F53A2.7            | NEIVGITIK              | 14  | 1991  | 1.17 | 0.09 | 7  |
| 10 F53A2.7           | NEIVGITIK              | 52  | 3897  | 1.20 | 0.13 | 11 |
| 10 F53A2.7           | GEESFEIDEHPRATT AESLAK | 26  | 9776  | 1.20 | 0.12 | 10 |
| 1 F53A2.7            | RTAFGTFGGK             | 29  | 1874  | 1.21 | 0.15 | 12 |
| 22 F53A2.7           | GEESFEIDEHPRATT AESLAK | 19  | 20967 | 1.22 | 0.17 | 14 |
| 7 F53A2.7            | GLSATDLGVVASQAALK      | 131 | 4397  | 1.25 | 0.14 | 11 |
| 7 F53A2.7            | RTAFGTFGGK             | 35  | 2924  | 1.25 | 0.25 | 20 |
| 1 F53A2.7            | NEIVGITIK              | 14  | 893   | 1.26 | 0.15 | 12 |
| 7 F53A2.7            | NEIVGITIK              | 21  | 2182  | 1.28 | 0.13 | 10 |
| 1 F53A2.7            | GLSATDLGVVASQAALK      | 124 | 3795  | 1.29 | 0.14 | 11 |
| 7 F53A2.7            | NEIVGITIK              | 28  | 4287  | 1.34 | 0.12 | 9  |
| 22 F53A2.7           | GLSATDLGVVASQAALK      | 87  | 2753  | 1.35 | 0.13 | 10 |
| 22 F53A2.7           | RTAFGTFGGK             | 43  | 10704 | 1.38 | 0.26 | 19 |
| 22 F53A2.7           | VTRQEAD EFALRSQTLWK    | 16  | 6385  | 1.38 | 0.19 | 14 |
| 7 F53A2.7            | GLSATDLGVVASQAALK      | 126 | 7003  | 1.39 | 0.09 | 7  |
| 7 F53A2.7            | NEIVGITIK              | 21  | 1805  | 1.40 | 0.11 | 8  |
| 7 F53A2.7            | GLSATDLGVVASQAALK      | 128 | 5231  | 1.46 | 0.08 | 5  |
| 22 F53A2.7           | NEIVGITIK              | 34  | 4605  | 1.46 | 0.12 | 8  |
| 7 F53A2.7            | GLSATDLGVVASQAALK      | 113 | 5411  | 1.47 | 0.07 | 5  |
| 7 F53A2.7            | RTAFGTFGGK             | 24  | 5695  | 1.49 | 0.33 | 22 |
| 1 F53A2.7            | RTAFGTFGGK             | 37  | 2352  | 1.53 | 0.18 | 12 |
| 7 F53A2.7            | RTAFGTFGGK             | 45  | 8316  | 1.53 | 0.16 | 11 |
| 10 F53A2.7           | NEIVGITIK              | 31  | 4153  | 1.56 | 0.16 | 10 |

|              |                         |     |        |      |      |     |
|--------------|-------------------------|-----|--------|------|------|-----|
| 7 F53A2.7    | RTAFGTFGGK              | 47  | 4488   | 1.61 | 0.08 | 5   |
| 1 F53A2.7    | NEIVGITIK               | 11  | 1029   | 1.65 | 0.10 | 6   |
| 10 F53A2.7   | RTAFGTFGGK              | 31  | 3320   | 1.71 | 0.20 | 12  |
| 22 F53A2.7   | NEIVGITIK               | 21  | 4813   | 1.75 | 0.13 | 7   |
| 22 F53A2.7   | RTAFGTFGGK              | 10  | 14498  | 2.00 | 0.13 | 7   |
| 10 F53A2.7   | GLSATDLGVVASQAALK       | 118 | 5256   | 2.02 | 0.12 | 6   |
| 22 F53A2.7   | GLSATDLGVVASQAALK       | 104 | 14947  | 2.06 | 0.12 | 6   |
| 10 F53A2.7   | GLSATDLGVVASQAALK       | 118 | 7196   | 2.08 | 0.07 | 4   |
| 1 F53A2.7    | GLSATDLGVVASQAALK       | 132 | 3164   | 2.10 | 0.13 | 6   |
| 10 F53A2.7   | RTAFGTFGGK              | 37  | 2919   | 2.24 | 0.39 | 18  |
| 22 F53A2.7   | GLSATDLGVVASQAALK       | 107 | 4904   | 2.33 | 0.17 | 7   |
| 1 F53A2.7    | RTAFGTFGGK              | 12  | 2329   | 2.37 | 0.09 | 4   |
| 1 F53C11.3   | VALVTGGGTGLGK           | 18  | 674    | 0.29 | 0.11 | 40  |
| 1 F53F1.2    | VRSIGVSNYEIVHLEELK      | 13  | 3501   | 0.81 | 0.19 | 23  |
| 7 F53F1.2    | IAYEVLEEAK              | 23  | 742    | 0.81 | 0.16 | 19  |
| 1 F53F1.2    | LIEDPVVVELAK            | 33  | 1317   | 0.84 | 0.19 | 22  |
| 10 F53F1.2   | LIEDPVVVELAK            | 51  | 2075   | 0.89 | 0.10 | 12  |
| 1 F53F1.2    | LIEDPVVVELAK            | 36  | 874    | 0.91 | 0.10 | 11  |
| 7 F53F1.2    | IAYEVLEEAK              | 40  | 1210   | 0.95 | 0.22 | 24  |
| 10 F53F1.2   | IAYEVLEEAK              | 56  | 3814   | 0.98 | 0.13 | 14  |
| 10 F53F1.2   | LIEDPVVVELAK            | 51  | 2361   | 1.04 | 0.09 | 8   |
| 10 F53F1.2   | VRSIGVSNYEIVHLEELK      | 30  | 6940   | 1.05 | 0.14 | 14  |
| 1 F53F1.2    | IAYEVLEEAK              | 72  | 3697   | 1.12 | 0.15 | 13  |
| 1 F53F1.2    | VRSIGVSNYEIVHLEELK      | 28  | 2920   | 1.18 | 0.12 | 10  |
| 1 F53F1.2    | IAYEVLEEAK              | 68  | 3416   | 1.32 | 0.13 | 10  |
| 10 F53F1.3   | TTVLLSWATSQK            | 22  | 1089   | 0.54 | 0.22 | 41  |
| 10 F53F1.3   | TTVLLSWATSQK            | 24  | 1149   | 0.54 | 0.21 | 38  |
| 22 F53F1.3   | LVDESLLK                | 44  | 820    | 0.57 | 0.29 | 51  |
| 10 F53F1.3   | EIGDALEILLPK            | 32  | 2483   | 0.61 | 0.29 | 47  |
| 1 F53F1.3    | REDIFITTK               | 20  | 2257   | 0.68 | 0.08 | 12  |
| 10 F53F1.3   | EIGDALEILLPK            | 22  | 1728   | 0.70 | 0.29 | 42  |
| 10 F53F1.3   | LVDESLLK                | 30  | 1256   | 0.76 | 0.15 | 19  |
| 22 F53F1.3   | LVDESLLK                | 23  | 694    | 0.76 | 0.20 | 26  |
| 7 F53F1.3    | REDIFITTK               | 25  | 2543   | 0.80 | 0.19 | 24  |
| 10 F53F1.3   | LVDESLLK                | 27  | 981    | 0.80 | 0.19 | 24  |
| 10 F53F1.3   | STNPERLAQNLK            | 19  | 2641   | 0.86 | 0.15 | 18  |
| 10 F53F1.3   | REDIFITTK               | 11  | 4723   | 0.92 | 0.15 | 16  |
| 1 F53F1.3    | STNPERLAQNLK            | 24  | 2050   | 0.93 | 0.16 | 17  |
| 22 F53F1.3   | REDIFITTK               | 26  | 4168   | 1.20 | 0.07 | 6   |
| 22 F53F1.3   | STNPERLAQNLK            | 14  | 1396   | 1.92 | 0.20 | 10  |
| 7 F53F10.4   | TAANVEEAFIDTAK          | 29  | 1484   | 1.13 | 0.16 | 14  |
| 22 F53F10.4  | IQEGVFDINNEANGIK        | 48  | 1294   | 1.14 | 0.17 | 15  |
| 10 F53G12.1  | VVLIGDSGVGK             | 55  | 5127   | 0.54 | 0.12 | 23  |
| 22 F53G12.1  | STIGVEFATRSISVEGK       | 43  | 2513   | 0.67 | 0.24 | 36  |
| 22 F53G12.1  | VVLIGDSGVGK             | 38  | 5695   | 0.68 | 0.16 | 23  |
| 10 F53G12.1  | VVLIGDSGVGK             | 39  | 3559   | 0.82 | 0.18 | 22  |
| 22 F53G12.1  | VVLIGDSGVGK             | 32  | 2853   | 1.00 | 0.12 | 12  |
| 10 F53G12.1  | VVLIGDSGVGK             | 33  | 1855   | 1.62 | 0.12 | 8   |
| 22 F53G12.1  | VVLIGDSGVGK             | 60  | 5221   | 2.55 | 0.21 | 8   |
| 22 F53G12.10 | EATNFLWPFK              | 60  | 9093   | 0.31 | 0.17 | 54  |
| 22 F53G12.10 | TIHDLLYK                | 26  | 8886   | 0.34 | 0.15 | 44  |
| 22 F53G12.10 | GDFYVPAEHK              | 43  | 23992  | 0.35 | 0.42 | 120 |
| 1 F53G12.10  | GDFYVPAEHK              | 24  | 4014   | 0.35 | 0.09 | 24  |
| 22 F53G12.10 | GDFYVPAEHK              | 43  | 37293  | 0.36 | 0.20 | 54  |
| 7 F53G12.10  | EATNFLWPFK              | 31  | 2445   | 0.37 | 0.07 | 19  |
| 7 F53G12.10  | EGLRLK                  | 20  | 10106  | 0.37 | 0.15 | 39  |
| 7 F53G12.10  | TIHDLLYK                | 39  | 32449  | 0.38 | 0.08 | 20  |
| 22 F53G12.10 | TIHDLLYK                | 36  | 201409 | 0.39 | 0.16 | 40  |
| 22 F53G12.10 | EATNFLWPFK              | 55  | 9527   | 0.40 | 0.07 | 17  |
| 22 F53G12.10 | VDGNRVPITDNTIVEQSLGK    | 71  | 7794   | 0.42 | 0.12 | 28  |
| 22 F53G12.10 | TIHDLLYK                | 35  | 227003 | 0.42 | 0.12 | 30  |
| 22 F53G12.10 | EGLRLK                  | 21  | 32036  | 0.43 | 0.09 | 21  |
| 7 F53G12.10  | TIHDLLYK                | 41  | 27367  | 0.45 | 0.12 | 27  |
| 7 F53G12.10  | GDFYVPAEHK              | 22  | 3799   | 0.48 | 0.07 | 15  |
| 10 F53G12.10 | EATNFLWPFK              | 22  | 1508   | 0.48 | 0.16 | 34  |
| 1 F53G12.10  | TIHDLLYK                | 36  | 128270 | 0.49 | 0.05 | 10  |
| 22 F53G12.10 | TNHFVEGGDFGNREDQINNLLRK | 24  | 10720  | 0.49 | 0.34 | 69  |
| 22 F53G12.10 | YVQEYRNAQK              | 30  | 2483   | 0.51 | 0.12 | 25  |
| 1 F53G12.10  | TIHDLLYK                | 17  | 2226   | 0.51 | 0.11 | 21  |
| 10 F53G12.10 | EATNFLWPFK              | 10  | 782    | 0.51 | 0.10 | 20  |
| 1 F53G12.10  | TIHDLLYK                | 49  | 113675 | 0.53 | 0.13 | 25  |
| 7 F53G12.10  | TNHFVEGGDFGNREDQINNLLRK | 15  | 2208   | 0.53 | 0.16 | 30  |
| 22 F53G12.10 | TNHFVEGGDFGNREDQINNLLRK | 30  | 8846   | 0.53 | 0.14 | 26  |
| 1 F53G12.10  | EGLRLK                  | 19  | 11936  | 0.55 | 0.25 | 47  |
| 1 F53G12.10  | VDGNRVPITDNTIVEQSLGK    | 36  | 4877   | 0.55 | 0.12 | 22  |
| 1 F53G12.10  | GDFYVPAEHK              | 16  | 3480   | 0.56 | 0.11 | 19  |
| 1 F53G12.10  | TIHDLLYK                | 21  | 2574   | 0.58 | 0.13 | 23  |
| 1 F53G12.10  | EATNFLWPFK              | 19  | 564    | 0.58 | 0.13 | 22  |
| 1 F53G12.10  | YVQEYRNAQK              | 13  | 1563   | 0.58 | 0.13 | 22  |
| 1 F53G12.10  | TIHDLLYK                | 16  | 3266   | 0.59 | 0.13 | 22  |
| 22 F53G12.10 | TNHFVEGGDFGNREDQINNLLRK | 18  | 6095   | 0.59 | 0.07 | 11  |
| 1 F53G12.10  | YVQEYRNAQK              | 19  | 1718   | 0.60 | 0.12 | 20  |
| 1 F53G12.10  | VDGNRVPITDNTIVEQSLGK    | 48  | 6194   | 0.60 | 0.10 | 16  |
| 1 F53G12.10  | EATNFLWPFK              | 17  | 899    | 0.61 | 0.09 | 16  |
| 10 F53G12.10 | GDFYVPAEHK              | 46  | 40824  | 0.61 | 0.08 | 14  |
| 22 F53G12.10 | EATNFLWPFK              | 33  | 1140   | 0.62 | 0.09 | 15  |
| 22 F53G12.10 | VDGNRVPITDNTIVEQSLGK    | 58  | 6867   | 0.64 | 0.21 | 33  |
| 10 F53G12.10 | EATNFLWPFK              | 17  | 1467   | 0.65 | 0.24 | 37  |
| 10 F53G12.10 | EATNFLWPFK              | 81  | 35389  | 0.65 | 0.09 | 13  |
| 10 F53G12.10 | VDGNRVPITDNTIVEQSLGK    | 56  | 4973   | 0.65 | 0.09 | 14  |
| 10 F53G12.10 | GDFYVPAEHK              | 45  | 53679  | 0.66 | 0.08 | 12  |
| 22 F53G12.10 | TNHFVEGGDFGNREDQINNLLRK | 26  | 13552  | 0.67 | 0.16 | 24  |
| 1 F53G12.10  | VDGNRVPITDNTIVEQSLGK    | 49  | 6437   | 0.68 | 0.11 | 16  |
| 22 F53G12.10 | EATNFLWPFK              | 20  | 1762   | 0.69 | 0.10 | 14  |
| 1 F53G12.10  | EATNFLWPFK              | 73  | 9148   | 0.70 | 0.19 | 27  |
| 1 F53G12.10  | VDGNRVPITDNTIVEQSLGK    | 12  | 1504   | 0.71 | 0.16 | 22  |
| 1 F53G12.10  | VDGNRVPITDNTIVEQSLGK    | 23  | 3250   | 0.72 | 0.11 | 15  |
| 10 F53G12.10 | EATNFLWPFK              | 74  | 37144  | 0.73 | 0.18 | 24  |
| 1 F53G12.10  | EATNFLWPFK              | 80  | 9722   | 0.75 | 0.09 | 12  |
| 7 F53G12.10  | GDFYVPAEHK              | 26  | 16874  | 0.75 | 0.22 | 29  |
| 22 F53G12.10 | YVQEYRNAQK              | 22  | 2297   | 0.76 | 0.17 | 23  |

|              |                         |    |        |       |      |    |
|--------------|-------------------------|----|--------|-------|------|----|
| 22 F53G12.10 | YVQEYRNAQK              | 36 | 3143   | 0.76  | 0.15 | 19 |
| 1 F53G12.10  | TIHDLLYK                | 12 | 2127   | 0.77  | 0.17 | 22 |
| 10 F53G12.10 | VDGNRVPITDNTIVEQSLGK    | 59 | 7335   | 0.78  | 0.12 | 15 |
| 7 F53G12.10  | EATNFLWPFK              | 30 | 1814   | 0.78  | 0.16 | 20 |
| 22 F53G12.10 | VDGNRVPITDNTIVEQSLGK    | 50 | 2337   | 0.78  | 0.26 | 33 |
| 22 F53G12.10 | TIHDLLYK                | 31 | 8887   | 0.79  | 0.09 | 11 |
| 7 F53G12.10  | GDFYVPAEHK              | 25 | 14904  | 0.80  | 0.04 | 5  |
| 22 F53G12.10 | EATNFLWPFK              | 23 | 1510   | 0.80  | 0.15 | 19 |
| 7 F53G12.10  | VDGNRVPITDNTIVEQSLGK    | 53 | 13656  | 0.82  | 0.20 | 24 |
| 10 F53G12.10 | EATNFLWPFK              | 16 | 961    | 0.82  | 0.21 | 26 |
| 10 F53G12.10 | YVQEYRNAQK              | 36 | 3284   | 0.83  | 0.15 | 19 |
| 1 F53G12.10  | YVQEYRNAQK              | 31 | 1916   | 0.84  | 0.21 | 25 |
| 10 F53G12.10 | TNHFVEGGDFGNREDQINNLLRK | 19 | 15150  | 0.85  | 0.07 | 8  |
| 7 F53G12.10  | EATNFLWPFK              | 16 | 1363   | 0.86  | 0.11 | 12 |
| 10 F53G12.10 | YVQEYRNAQK              | 39 | 2939   | 0.89  | 0.17 | 19 |
| 10 F53G12.10 | TIHDLLYK                | 51 | 337542 | 0.92  | 0.03 | 3  |
| 22 F53G12.10 | YVQEYRNAQK              | 30 | 7617   | 0.93  | 0.12 | 13 |
| 1 F53G12.10  | TNHFVEGGDFGNREDQINNLLRK | 11 | 5079   | 0.94  | 0.07 | 8  |
| 10 F53G12.10 | TIHDLLYK                | 38 | 316751 | 0.96  | 0.05 | 5  |
| 22 F53G12.10 | TIHDLLYK                | 15 | 6358   | 0.96  | 0.06 | 7  |
| 10 F53G12.10 | EATNFLWPFK              | 40 | 2042   | 0.97  | 0.16 | 17 |
| 1 F53G12.10  | YVQEYRNAQK              | 35 | 10174  | 0.98  | 0.07 | 7  |
| 1 F53G12.10  | YVQEYRNAQK              | 27 | 6290   | 0.98  | 0.12 | 12 |
| 1 F53G12.10  | TNHFVEGGDFGNREDQINNLLRK | 13 | 4811   | 1.00  | 0.23 | 23 |
| 1 F53G12.10  | LNNPTGGWTK              | 19 | 5793   | 1.00  | 0.11 | 11 |
| 22 F53G12.10 | YVQEYRNAQK              | 32 | 2376   | 1.00  | 0.19 | 19 |
| 22 F53G12.10 | GDFYVPAEHK              | 34 | 21137  | 1.04  | 0.05 | 5  |
| 22 F53G12.10 | GDFYVPAEHK              | 15 | 16985  | 1.04  | 0.33 | 31 |
| 1 F53G12.10  | YVQEYRNAQK              | 27 | 1129   | 1.05  | 0.16 | 16 |
| 1 F53G12.10  | GDFYVPAEHK              | 11 | 15544  | 1.05  | 0.11 | 11 |
| 22 F53G12.10 | VDGNRVPITDNTIVEQSLGK    | 60 | 6108   | 1.06  | 0.15 | 14 |
| 7 F53G12.10  | EATNFLWPFK              | 22 | 1358   | 1.08  | 0.16 | 15 |
| 22 F53G12.10 | TIHDLLYK                | 31 | 9884   | 1.11  | 0.12 | 11 |
| 1 F53G12.10  | GDFYVPAEHK              | 12 | 10882  | 1.11  | 0.08 | 7  |
| 10 F53G12.10 | VDGNRVPITDNTIVEQSLGK    | 40 | 12878  | 1.12  | 0.22 | 19 |
| 22 F53G12.10 | YVQEYRNAQK              | 34 | 7772   | 1.13  | 0.13 | 11 |
| 22 F53G12.10 | TIHDLLYK                | 35 | 8573   | 1.15  | 0.15 | 13 |
| 10 F53G12.10 | TIHDLLYK                | 23 | 8633   | 1.19  | 0.09 | 8  |
| 10 F53G12.10 | VDGNRVPITDNTIVEQSLGK    | 30 | 3901   | 1.22  | 0.11 | 9  |
| 22 F53G12.10 | TNHFVEGGDFGNREDQINNLLRK | 21 | 44151  | 1.23  | 0.57 | 46 |
| 22 F53G12.10 | EGLRLK                  | 13 | 5900   | 1.25  | 0.39 | 31 |
| 22 F53G12.10 | GDFYVPAEHK              | 21 | 5923   | 1.28  | 0.03 | 3  |
| 22 F53G12.10 | GDFYVPAEHK              | 18 | 7215   | 1.32  | 0.01 | 1  |
| 10 F53G12.10 | TNHFVEGGDFGNREDQINNLLRK | 26 | 17319  | 1.33  | 0.17 | 12 |
| 10 F53G12.10 | YVQEYRNAQK              | 35 | 11778  | 1.41  | 0.12 | 9  |
| 10 F53G12.10 | TIHDLLYK                | 11 | 8647   | 1.41  | 0.14 | 10 |
| 10 F53G12.10 | GDFYVPAEHK              | 18 | 12732  | 1.50  | 0.10 | 6  |
| 10 F53G12.10 | LNNPTGGWTK              | 30 | 10336  | 1.64  | 0.04 | 2  |
| 10 F53G12.10 | GDFYVPAEHK              | 16 | 12136  | 1.70  | 0.11 | 7  |
| 10 F53G12.10 | YVQEYRNAQK              | 29 | 8520   | 1.74  | 0.11 | 6  |
| 22 F53G12.10 | ALQILRLRQINNGVFK        | 17 | 2281   | 1.76  | 0.38 | 22 |
| 10 F53G12.10 | GDFYVPAEHK              | 22 | 17567  | 1.82  | 0.12 | 7  |
| 10 F53G12.10 | TIHDLLYK                | 20 | 2874   | 1.85  | 0.20 | 11 |
| 10 F53G12.10 | GDFYVPAEHK              | 24 | 25176  | 2.01  | 0.07 | 3  |
| 10 F53G12.10 | TIHDLLYK                | 20 | 15298  | 2.32  | 0.11 | 5  |
| 7 F53G12.10  | VDGNRVPITDNTIVEQSLGK    | 49 | 3430   | 3.11  | 0.15 | 5  |
| 22 F53G12.10 | VDGNRVPITDNTIVEQSLGK    | 36 | 5478   | 3.15  | 0.18 | 6  |
| 22 F53G12.10 | VDGNRVPITDNTIVEQSLGK    | 24 | 4428   | 3.50  | 0.17 | 5  |
| 7 F53G12.10  | YVQEYRNAQK              | 28 | 1649   | 3.77  | 0.51 | 14 |
| 22 F53G12.10 | EATNFLWPFK              | 25 | 2246   | 4.16  | 0.12 | 3  |
| 7 F53G12.10  | EATNFLWPFK              | 19 | 698    | 4.43  | 0.27 | 6  |
| 22 F53G12.10 | EATNFLWPFK              | 18 | 1274   | 4.86  | 0.17 | 3  |
| 7 F53G12.10  | YVQEYRNAQK              | 48 | 2176   | 5.03  | 0.23 | 5  |
| 7 F53G12.10  | EGLRLK                  | 13 | 2078   | 6.39  | 0.10 | 2  |
| 22 F53G12.10 | YVQEYRNAQK              | 27 | 3090   | 6.46  | 0.13 | 2  |
| 22 F53G12.10 | TIHDLLYK                | 15 | 12186  | 6.91  | 0.19 | 3  |
| 22 F53G12.10 | YVQEYRNAQK              | 41 | 3433   | 7.80  | 0.07 | 1  |
| 22 F53G12.10 | GDFYVPAEHK              | 36 | 18513  | 8.96  | 0.08 | 1  |
| 22 F53G12.10 | GDFYVPAEHK              | 27 | 16894  | 10.97 | 0.13 | 1  |
| 7 F53G12.10  | GDFYVPAEHK              | 35 | 10352  | 16.00 | 0.22 | 1  |
| 1 F54A3.3    | GISDLAQHFLLK            | 16 | 604    | 0.35  | 0.22 | 62 |
| 10 F54A3.3   | GISDLAQHFLLK            | 79 | 3427   | 0.48  | 0.06 | 13 |
| 22 F54A3.3   | GISDLAQHFLLK            | 62 | 2606   | 0.51  | 0.26 | 50 |
| 22 F54A3.3   | IPGGRIEDSQVVK           | 13 | 4064   | 0.53  | 0.10 | 20 |
| 10 F54A3.3   | IPGGRIEDSQVVK           | 27 | 8561   | 0.55  | 0.17 | 31 |
| 7 F54A3.3    | LKPDLVFTEK              | 21 | 4980   | 0.56  | 0.16 | 28 |
| 7 F54A3.3    | GISDLAQHFLLK            | 35 | 1539   | 0.57  | 0.10 | 18 |
| 7 F54A3.3    | GISDLAQHFLLK            | 50 | 2927   | 0.58  | 0.17 | 29 |
| 10 F54A3.3   | GISDLAQHFLLK            | 45 | 1966   | 0.59  | 0.28 | 48 |
| 1 F54A3.3    | GISDLAQHFLLK            | 36 | 782    | 0.59  | 0.18 | 30 |
| 22 F54A3.3   | LKPDLVFTEK              | 19 | 5031   | 0.61  | 0.12 | 20 |
| 7 F54A3.3    | GISDLAQHFLLK            | 53 | 2671   | 0.63  | 0.17 | 27 |
| 22 F54A3.3   | GISDLAQHFLLK            | 72 | 3089   | 0.66  | 0.14 | 21 |
| 10 F54A3.3   | GISDLAQHFLLK            | 37 | 1598   | 0.67  | 0.14 | 22 |
| 10 F54A3.3   | IPGGRIEDSQVVK           | 12 | 7892   | 0.68  | 0.18 | 26 |
| 22 F54A3.3   | GISDLAQHFLLK            | 81 | 4531   | 0.68  | 0.09 | 14 |
| 22 F54A3.3   | GISDLAQHFLLK            | 63 | 2268   | 0.70  | 0.13 | 19 |
| 22 F54A3.3   | GISDLAQHFLLK            | 51 | 2599   | 0.71  | 0.12 | 16 |
| 22 F54A3.3   | GISDLAQHFLLK            | 87 | 4431   | 0.72  | 0.15 | 21 |
| 7 F54A3.3    | GISDLAQHFLLK            | 54 | 1790   | 0.72  | 0.12 | 16 |
| 7 F54A3.3    | GISDLAQHFLLK            | 57 | 2685   | 0.77  | 0.17 | 22 |
| 7 F54A3.3    | GISDLAQHFLLK            | 49 | 2789   | 0.77  | 0.15 | 20 |
| 10 F54A3.3   | IPGGRIEDSQVVK           | 15 | 3530   | 0.77  | 0.17 | 22 |
| 1 F54A3.3    | AQLFEVVK                | 26 | 618    | 0.81  | 0.09 | 11 |
| 22 F54A3.3   | GISDLAQHFLLK            | 55 | 1301   | 0.83  | 0.19 | 23 |
| 7 F54A3.3    | IPGGRIEDSQVVK           | 16 | 4368   | 0.86  | 0.30 | 35 |
| 7 F54A3.3    | THPTLIK                 | 11 | 4785   | 0.87  | 0.20 | 23 |
| 10 F54A3.3   | GISDLAQHFLLK            | 64 | 1832   | 0.88  | 0.22 | 24 |
| 1 F54A3.3    | GISDLAQHFLLK            | 55 | 1482   | 0.89  | 0.14 | 15 |
| 7 F54A3.3    | GISDLAQHFLLK            | 85 | 3052   | 0.94  | 0.15 | 16 |
| 22 F54A3.3   | THPTLIK                 | 12 | 12679  | 0.94  | 0.09 | 10 |

|            |                        |     |       |      |      |     |
|------------|------------------------|-----|-------|------|------|-----|
| 7 F54A3.3  | GISDLAQHFLLK           | 58  | 1866  | 0.94 | 0.11 | 11  |
| 22 F54A3.3 | GISDLAQHFLLK           | 32  | 1195  | 0.97 | 0.13 | 13  |
| 22 F54A3.3 | GISDLAQHFLLK           | 94  | 3759  | 1.01 | 0.16 | 16  |
| 22 F54A3.3 | IPGGRIEDSQVVK          | 23  | 7661  | 1.08 | 0.12 | 11  |
| 10 F54A3.3 | THPTLIK                | 13  | 8103  | 1.09 | 0.19 | 18  |
| 22 F54A3.3 | GISDLAQHFLLK           | 50  | 2342  | 1.12 | 0.14 | 13  |
| 7 F54A3.3  | THPTLIK                | 21  | 17050 | 1.13 | 0.09 | 8   |
| 1 F54A3.3  | THPTLIK                | 14  | 5233  | 1.16 | 0.16 | 14  |
| 1 F54A3.3  | THPTLIK                | 20  | 22398 | 1.20 | 0.23 | 19  |
| 1 F54A3.3  | AQLFEVVK               | 27  | 612   | 1.28 | 0.18 | 14  |
| 22 F54A3.3 | THPTLIK                | 16  | 8187  | 1.31 | 0.09 | 7   |
| 22 F54A3.3 | IPGGRIEDSQVVK          | 11  | 7708  | 1.34 | 0.13 | 9   |
| 7 F54A3.3  | IPGGRIEDSQVVK          | 12  | 6069  | 1.35 | 0.11 | 8   |
| 22 F54A3.3 | GISDLAQHFLLK           | 45  | 2008  | 1.35 | 0.15 | 11  |
| 7 F54A3.3  | THPTLIK                | 15  | 11978 | 1.35 | 0.06 | 4   |
| 1 F54A3.3  | IPGGRIEDSQVVK          | 11  | 4241  | 1.35 | 0.23 | 17  |
| 10 F54A3.3 | THPTLIK                | 12  | 21555 | 1.44 | 0.20 | 14  |
| 7 F54A3.3  | THPTLIK                | 33  | 6514  | 1.48 | 0.09 | 6   |
| 10 F54A3.3 | GISDLAQHFLLK           | 37  | 1625  | 1.52 | 0.20 | 13  |
| 22 F54A3.3 | THPTLIK                | 16  | 8015  | 1.54 | 0.11 | 7   |
| 10 F54A3.3 | GISDLAQHFLLK           | 52  | 1594  | 1.57 | 0.16 | 11  |
| 7 F54A3.3  | THPTLIK                | 18  | 6786  | 1.58 | 0.09 | 6   |
| 1 F54A3.3  | THPTLIK                | 17  | 19468 | 1.62 | 0.09 | 6   |
| 22 F54A3.3 | THPTLIK                | 16  | 29112 | 1.74 | 0.05 | 3   |
| 10 F54A3.3 | GISDLAQHFLLK           | 59  | 1401  | 1.79 | 0.15 | 8   |
| 10 F54A3.3 | GISDLAQHFLLK           | 51  | 2147  | 1.80 | 0.11 | 6   |
| 22 F54A3.3 | THPTLIK                | 15  | 10590 | 1.83 | 0.17 | 9   |
| 1 F54A3.3  | THPTLIK                | 12  | 7321  | 1.83 | 0.24 | 13  |
| 10 F54A3.3 | GISDLAQHFLLK           | 59  | 2984  | 1.84 | 0.14 | 8   |
| 1 F54A3.3  | AQLFEVVK               | 29  | 356   | 1.88 | 0.18 | 10  |
| 7 F54A3.3  | IPGGRIEDSQVVK          | 13  | 5760  | 1.90 | 0.07 | 4   |
| 1 F54A3.3  | THPTLIK                | 10  | 2124  | 1.90 | 0.39 | 21  |
| 7 F54A3.3  | GISDLAQHFLLK           | 39  | 1514  | 1.94 | 0.24 | 12  |
| 1 F54A3.3  | IPGGRIEDSQVVK          | 17  | 3709  | 1.99 | 0.09 | 4   |
| 1 F54A3.3  | AQLFEVVK               | 36  | 1511  | 2.13 | 0.14 | 7   |
| 10 F54A3.3 | THPTLIK                | 17  | 6710  | 2.13 | 0.08 | 4   |
| 7 F54A3.3  | GISDLAQHFLLK           | 40  | 2428  | 2.14 | 0.15 | 7   |
| 10 F54A3.3 | AQLFEVVK               | 76  | 5284  | 2.27 | 0.08 | 3   |
| 22 F54A3.3 | THPTLIK                | 12  | 18558 | 2.30 | 0.17 | 7   |
| 22 F54A3.3 | AQLFEVVK               | 30  | 2580  | 2.41 | 0.07 | 3   |
| 7 F54A3.3  | GISDLAQHFLLK           | 42  | 2413  | 2.44 | 0.13 | 5   |
| 7 F54A3.3  | THPTLIK                | 12  | 21135 | 2.84 | 0.14 | 5   |
| 7 F54A3.3  | GISDLAQHFLLK           | 38  | 2128  | 3.09 | 0.11 | 4   |
| 10 F54A3.3 | THPTLIK                | 13  | 5392  | 3.27 | 0.24 | 7   |
| 10 F54A3.3 | THPTLIK                | 23  | 42470 | 3.61 | 0.13 | 4   |
| 10 F54A3.3 | THPTLIK                | 13  | 11123 | 3.71 | 0.12 | 3   |
| 10 F54A3.3 | GISDLAQHFLLK           | 52  | 2713  | 3.83 | 0.15 | 4   |
| 10 F54A3.3 | THPTLIK                | 25  | 39319 | 3.85 | 0.08 | 2   |
| 7 F54A3.3  | AQLFEVVK               | 19  | 708   | 4.45 | 0.33 | 8   |
| 10 F54A3.3 | GISDLAQHFLLK           | 44  | 2773  | 4.56 | 0.12 | 3   |
| 7 F54C1.7  | EGNGVISRPTLK           | 21  | 3165  | 0.54 | 0.15 | 27  |
| 10 F54C1.7 | FFDAFDRGK              | 45  | 5657  | 0.56 | 0.36 | 63  |
| 10 F54C1.7 | FFDAFDRGK              | 31  | 4664  | 0.75 | 0.16 | 21  |
| 7 F54C1.7  | FFDAFDRGK              | 25  | 3402  | 0.95 | 0.15 | 15  |
| 1 F54C9.5  | VHSAIRADASPAK          | 25  | 954   | 0.25 | 0.13 | 53  |
| 22 F54C9.5 | FLAAGLNADNLVATYQK      | 68  | 1459  | 0.32 | 0.33 | 104 |
| 10 F54C9.5 | ALLLQK                 | 22  | 1335  | 0.34 | 0.14 | 43  |
| 10 F54C9.5 | DVVAQLAYSK             | 58  | 3813  | 0.34 | 0.08 | 23  |
| 10 F54C9.5 | ALLLQK                 | 25  | 1277  | 0.35 | 0.16 | 46  |
| 22 F54C9.5 | FLAAGLNADNLVATYQK      | 59  | 2100  | 0.36 | 0.32 | 89  |
| 1 F54C9.5  | VHSAIRADASPAK          | 27  | 747   | 0.38 | 0.15 | 40  |
| 22 F54C9.5 | ALLLQK                 | 49  | 7745  | 0.39 | 0.03 | 7   |
| 1 F54C9.5  | AVLDIGLARTTTGSK        | 35  | 17055 | 0.40 | 0.06 | 16  |
| 10 F54C9.5 | DVVAQLAYSK             | 52  | 2727  | 0.42 | 0.09 | 21  |
| 22 F54C9.5 | ALLLQK                 | 49  | 7166  | 0.43 | 0.05 | 12  |
| 22 F54C9.5 | FLAAGLNADNLVATYQK      | 100 | 4196  | 0.45 | 0.11 | 24  |
| 1 F54C9.5  | ALLLQK                 | 10  | 412   | 0.45 | 0.23 | 51  |
| 1 F54C9.5  | ALLLQK                 | 10  | 377   | 0.46 | 0.20 | 43  |
| 22 F54C9.5 | ALLLQK                 | 49  | 14082 | 0.46 | 0.05 | 12  |
| 10 F54C9.5 | AVLDIGLARTTTGSK        | 44  | 4746  | 0.46 | 0.08 | 17  |
| 10 F54C9.5 | TIGLDSTYK              | 12  | 9589  | 0.47 | 0.12 | 26  |
| 7 F54C9.5  | AVLDIGLARTTTGSK        | 50  | 6636  | 0.48 | 0.08 | 16  |
| 10 F54C9.5 | AVLDIGLARTTTGSK        | 43  | 6939  | 0.50 | 0.10 | 21  |
| 22 F54C9.5 | ALLLQK                 | 49  | 11652 | 0.51 | 0.08 | 16  |
| 1 F54C9.5  | ALLLQK                 | 44  | 7649  | 0.51 | 0.07 | 13  |
| 10 F54C9.5 | ALLLQK                 | 23  | 1409  | 0.51 | 0.22 | 44  |
| 1 F54C9.5  | ALLLQK                 | 17  | 721   | 0.52 | 0.07 | 14  |
| 10 F54C9.5 | TIGLDSTYK              | 40  | 13279 | 0.53 | 0.09 | 16  |
| 1 F54C9.5  | ALLLQK                 | 67  | 32849 | 0.56 | 0.03 | 6   |
| 10 F54C9.5 | ALLLQK                 | 56  | 45526 | 0.56 | 0.09 | 17  |
| 10 F54C9.5 | ALLLQK                 | 52  | 34769 | 0.57 | 0.06 | 11  |
| 1 F54C9.5  | ALLLQK                 | 66  | 27237 | 0.57 | 0.03 | 5   |
| 1 F54C9.5  | ALLLQK                 | 59  | 8371  | 0.58 | 0.03 | 6   |
| 10 F54C9.5 | DVVAQLAYSK             | 54  | 6256  | 0.59 | 0.13 | 23  |
| 10 F54C9.5 | ALLLQK                 | 58  | 31139 | 0.59 | 0.02 | 3   |
| 22 F54C9.5 | FLAAGLNADNLVATYQK      | 76  | 11117 | 0.59 | 0.23 | 40  |
| 10 F54C9.5 | ALLLQK                 | 62  | 35021 | 0.60 | 0.06 | 9   |
| 10 F54C9.5 | ALLLQK                 | 40  | 1254  | 0.60 | 0.13 | 22  |
| 22 F54C9.5 | FLAAGLNADNLVATYQK      | 108 | 5064  | 0.60 | 0.16 | 27  |
| 7 F54C9.5  | ALLLQK                 | 47  | 26835 | 0.61 | 0.01 | 2   |
| 1 F54C9.5  | ALLLQK                 | 21  | 560   | 0.62 | 0.04 | 7   |
| 10 F54C9.5 | ALLLQK                 | 22  | 1097  | 0.62 | 0.12 | 19  |
| 1 F54C9.5  | ALLLQK                 | 14  | 547   | 0.63 | 0.34 | 54  |
| 7 F54C9.5  | ALLLQK                 | 37  | 15157 | 0.65 | 0.05 | 8   |
| 1 F54C9.5  | GHEELTGEDYNVEEEGDRAPFK | 18  | 2108  | 0.65 | 0.14 | 22  |
| 10 F54C9.5 | ALLLQK                 | 29  | 1434  | 0.66 | 0.07 | 10  |
| 1 F54C9.5  | GHEELTGEDYNVEEEGDRAPFK | 35  | 3782  | 0.67 | 0.08 | 13  |
| 1 F54C9.5  | ALLLQK                 | 12  | 414   | 0.67 | 0.23 | 35  |
| 1 F54C9.5  | FLAAGLNADNLVATYQK      | 25  | 1111  | 0.67 | 0.09 | 13  |
| 1 F54C9.5  | HVADYMTYK              | 13  | 5099  | 0.68 | 0.06 | 9   |
| 1 F54C9.5  | AVLDIGLARTTTGSK        | 24  | 2470  | 0.68 | 0.21 | 30  |

|            |                           |     |        |      |      |    |
|------------|---------------------------|-----|--------|------|------|----|
| 10 F54C9.5 | DVVAQLAYSK                | 42  | 2986   | 0.68 | 0.17 | 25 |
| 22 F54C9.5 | FLAAGLNADNLVATYQK         | 39  | 3047   | 0.69 | 0.23 | 33 |
| 22 F54C9.5 | FLAAGLNADNLVATYQK         | 110 | 11485  | 0.69 | 0.12 | 17 |
| 1 F54C9.5  | HVADYMTYLK                | 14  | 890    | 0.70 | 0.12 | 17 |
| 10 F54C9.5 | FLAAGLNADNLVATYQK         | 94  | 1758   | 0.71 | 0.14 | 20 |
| 1 F54C9.5  | HVADYMTYLK                | 24  | 5252   | 0.73 | 0.10 | 13 |
| 1 F54C9.5  | GHEELTGEDYNVEEEGDRAPFK    | 43  | 6328   | 0.78 | 0.10 | 12 |
| 22 F54C9.5 | FLAAGLNADNLVATYQK         | 79  | 3156   | 0.80 | 0.18 | 23 |
| 22 F54C9.5 | HVADYMTYLK                | 16  | 3265   | 0.82 | 0.11 | 14 |
| 1 F54C9.5  | GHEELTGEDYNVEEEGDRAPFK    | 60  | 22101  | 0.83 | 0.23 | 28 |
| 7 F54C9.5  | GHEELTGEDYNVEEEGDRAPFK    | 56  | 26698  | 0.83 | 0.09 | 11 |
| 10 F54C9.5 | AVLDIGLARTTTGSK           | 76  | 27347  | 0.84 | 0.20 | 24 |
| 1 F54C9.5  | GHEELTGEDYNVEEEGDRAPFK    | 22  | 9292   | 0.85 | 0.10 | 12 |
| 22 F54C9.5 | TIGLDSTYK                 | 51  | 11783  | 0.87 | 0.29 | 33 |
| 7 F54C9.5  | GHEELTGEDYNVEEEGDRAPFK    | 23  | 15776  | 0.88 | 0.11 | 12 |
| 22 F54C9.5 | DVVAQLAYSK                | 37  | 1161   | 0.89 | 0.20 | 23 |
| 7 F54C9.5  | GHEELTGEDYNVEEEGDRAPFK    | 53  | 30998  | 0.89 | 0.14 | 16 |
| 22 F54C9.5 | FLAAGLNADNLVATYQK         | 46  | 2526   | 0.91 | 0.18 | 19 |
| 10 F54C9.5 | AVLDIGLARTTTGSK           | 12  | 4274   | 0.91 | 0.17 | 18 |
| 22 F54C9.5 | AVLDIGLARTTTGSK           | 25  | 4750   | 0.91 | 0.18 | 19 |
| 22 F54C9.5 | AVLDIGLARTTTGSK           | 72  | 22411  | 0.91 | 0.07 | 8  |
| 22 F54C9.5 | EYNAEAHRDRILGK            | 24  | 12257  | 0.93 | 0.25 | 26 |
| 10 F54C9.5 | FLAAGLNADNLVATYQK         | 106 | 3853   | 0.93 | 0.13 | 14 |
| 22 F54C9.5 | GHEELTGEDYNVEEEGDRAPFK    | 45  | 21498  | 0.94 | 0.11 | 12 |
| 22 F54C9.5 | DVVAQLAYSK                | 49  | 2007   | 0.94 | 0.12 | 13 |
| 10 F54C9.5 | FLAAGLNADNLVATYQK         | 88  | 2065   | 0.94 | 0.19 | 20 |
| 22 F54C9.5 | GVADGGINVPHSESRRFFGFDQESK | 13  | 24753  | 0.95 | 0.21 | 22 |
| 22 F54C9.5 | GHEELTGEDYNVEEEGDRAPFK    | 66  | 67364  | 0.95 | 0.12 | 13 |
| 10 F54C9.5 | GHEELTGEDYNVEEEGDRAPFK    | 49  | 42557  | 0.96 | 0.13 | 14 |
| 22 F54C9.5 | TIGLDSTYK                 | 38  | 11459  | 0.96 | 0.09 | 9  |
| 1 F54C9.5  | GHEELTGEDYNVEEEGDRAPFK    | 50  | 16489  | 0.96 | 0.11 | 12 |
| 22 F54C9.5 | AVLDIGLARTTTGSK           | 21  | 2032   | 0.98 | 0.19 | 20 |
| 22 F54C9.5 | IEGDVVVASAYSHELPRYGLK     | 20  | 2208   | 0.98 | 0.29 | 29 |
| 22 F54C9.5 | ALLQLK                    | 20  | 1055   | 0.99 | 0.12 | 12 |
| 1 F54C9.5  | ALLQLK                    | 36  | 1136   | 1.00 | 0.17 | 17 |
| 1 F54C9.5  | HVADYMTYLK                | 57  | 19075  | 1.01 | 0.08 | 8  |
| 7 F54C9.5  | ALLQLK                    | 31  | 7263   | 1.01 | 0.13 | 13 |
| 22 F54C9.5 | AVLDIGLARTTTGSK           | 48  | 24252  | 1.01 | 0.10 | 10 |
| 1 F54C9.5  | AVLDIGLARTTTGSK           | 24  | 4773   | 1.01 | 0.15 | 15 |
| 22 F54C9.5 | FLAAGLNADNLVATYQK         | 17  | 872    | 1.01 | 0.21 | 21 |
| 1 F54C9.5  | GVADGGINVPHSESRRFFGFDQESK | 24  | 14516  | 1.01 | 0.12 | 12 |
| 7 F54C9.5  | GHEELTGEDYNVEEEGDRAPFK    | 30  | 5871   | 1.01 | 0.07 | 7  |
| 10 F54C9.5 | GHEELTGEDYNVEEEGDRAPFK    | 58  | 19557  | 1.01 | 0.15 | 15 |
| 10 F54C9.5 | ALLQLK                    | 24  | 1065   | 1.02 | 0.09 | 9  |
| 10 F54C9.5 | ALLQLK                    | 22  | 954    | 1.02 | 0.11 | 11 |
| 10 F54C9.5 | ALLQLK                    | 17  | 829    | 1.02 | 0.13 | 13 |
| 1 F54C9.5  | GVADGGINVPHSESRRFFGFDQESK | 19  | 3965   | 1.02 | 0.10 | 10 |
| 7 F54C9.5  | EYNAEAHRDRILGK            | 13  | 6330   | 1.03 | 0.17 | 17 |
| 10 F54C9.5 | GVADGGINVPHSESRRFFGFDQESK | 21  | 4777   | 1.03 | 0.14 | 14 |
| 10 F54C9.5 | GHEELTGEDYNVEEEGDRAPFK    | 20  | 7914   | 1.03 | 0.22 | 21 |
| 10 F54C9.5 | FLAAGLNADNLVATYQK         | 86  | 1991   | 1.03 | 0.13 | 13 |
| 22 F54C9.5 | AVLDIGLARTTTGSK           | 41  | 4235   | 1.03 | 0.16 | 15 |
| 7 F54C9.5  | GHEELTGEDYNVEEEGDRAPFK    | 12  | 4502   | 1.04 | 0.22 | 21 |
| 7 F54C9.5  | GVADGGINVPHSESRRFFGFDQESK | 21  | 6057   | 1.04 | 0.15 | 15 |
| 22 F54C9.5 | ALLQLK                    | 35  | 1040   | 1.05 | 0.12 | 11 |
| 22 F54C9.5 | ALLQLK                    | 32  | 2005   | 1.05 | 0.09 | 9  |
| 10 F54C9.5 | GHEELTGEDYNVEEEGDRAPFK    | 54  | 45797  | 1.05 | 0.09 | 9  |
| 22 F54C9.5 | GHEELTGEDYNVEEEGDRAPFK    | 42  | 12286  | 1.06 | 0.17 | 16 |
| 1 F54C9.5  | GVADGGINVPHSESRRFFGFDQESK | 16  | 16385  | 1.06 | 0.13 | 13 |
| 10 F54C9.5 | AVLDIGLARTTTGSK           | 37  | 37346  | 1.07 | 0.18 | 17 |
| 7 F54C9.5  | GHEELTGEDYNVEEEGDRAPFK    | 41  | 17631  | 1.08 | 0.12 | 11 |
| 22 F54C9.5 | AVLDIGLARTTTGSK           | 63  | 3723   | 1.08 | 0.04 | 4  |
| 1 F54C9.5  | VHSAIRADASPAK             | 22  | 149616 | 1.09 | 0.13 | 12 |
| 10 F54C9.5 | GHEELTGEDYNVEEEGDRAPFK    | 31  | 27518  | 1.09 | 0.11 | 10 |
| 22 F54C9.5 | AVLDIGLARTTTGSK           | 15  | 1894   | 1.11 | 0.16 | 14 |
| 7 F54C9.5  | GVADGGINVPHSESRRFFGFDQESK | 13  | 6005   | 1.11 | 0.11 | 10 |
| 1 F54C9.5  | FLAAGLNADNLVATYQK         | 96  | 1520   | 1.12 | 0.16 | 14 |
| 1 F54C9.5  | HVADYMTYLK                | 61  | 11836  | 1.12 | 0.08 | 7  |
| 22 F54C9.5 | VHSAIRADASPAK             | 10  | 45401  | 1.12 | 0.18 | 16 |
| 22 F54C9.5 | GHEELTGEDYNVEEEGDRAPFK    | 36  | 60245  | 1.12 | 0.17 | 15 |
| 10 F54C9.5 | AVLDIGLARTTTGSK           | 65  | 8666   | 1.13 | 0.15 | 14 |
| 22 F54C9.5 | AVLDIGLARTTTGSK           | 14  | 1991   | 1.14 | 0.19 | 17 |
| 22 F54C9.5 | GHEELTGEDYNVEEEGDRAPFK    | 39  | 12998  | 1.14 | 0.14 | 12 |
| 22 F54C9.5 | GHEELTGEDYNVEEEGDRAPFK    | 40  | 4740   | 1.14 | 0.17 | 15 |
| 7 F54C9.5  | GHEELTGEDYNVEEEGDRAPFK    | 26  | 13664  | 1.15 | 0.08 | 7  |
| 10 F54C9.5 | HVADYMTYLK                | 12  | 833    | 1.15 | 0.10 | 8  |
| 22 F54C9.5 | ALLQLK                    | 35  | 1281   | 1.17 | 0.13 | 11 |
| 1 F54C9.5  | AVLDIGLARTTTGSK           | 13  | 1324   | 1.17 | 0.12 | 10 |
| 10 F54C9.5 | AVLDIGLARTTTGSK           | 26  | 3690   | 1.18 | 0.13 | 11 |
| 22 F54C9.5 | FLAAGLNADNLVATYQK         | 102 | 7945   | 1.18 | 0.11 | 9  |
| 1 F54C9.5  | FLAAGLNADNLVATYQK         | 64  | 808    | 1.18 | 0.19 | 16 |
| 7 F54C9.5  | RLTYDERK                  | 11  | 750    | 1.19 | 0.18 | 15 |
| 10 F54C9.5 | GHEELTGEDYNVEEEGDRAPFK    | 64  | 63009  | 1.20 | 0.16 | 13 |
| 7 F54C9.5  | ALLQLK                    | 29  | 13858  | 1.20 | 0.06 | 5  |
| 7 F54C9.5  | VHSAIRADASPAK             | 16  | 28514  | 1.20 | 0.19 | 16 |
| 10 F54C9.5 | HVADYMTYLK                | 52  | 19687  | 1.21 | 0.11 | 9  |
| 10 F54C9.5 | GHEELTGEDYNVEEEGDRAPFK    | 55  | 63613  | 1.21 | 0.10 | 8  |
| 1 F54C9.5  | GVADGGINVPHSESRRFFGFDQESK | 12  | 1708   | 1.21 | 0.15 | 12 |
| 1 F54C9.5  | FLAAGLNADNLVATYQK         | 18  | 640    | 1.22 | 0.36 | 30 |
| 7 F54C9.5  | FLAAGLNADNLVATYQK         | 83  | 1280   | 1.22 | 0.07 | 6  |
| 22 F54C9.5 | ALLQLK                    | 25  | 933    | 1.22 | 0.31 | 25 |
| 10 F54C9.5 | AVLDIGLARTTTGSK           | 62  | 16607  | 1.24 | 0.10 | 8  |
| 22 F54C9.5 | VHSAIRADASPAK             | 13  | 63055  | 1.26 | 0.15 | 12 |
| 22 F54C9.5 | AVLDIGLARTTTGSK           | 17  | 2710   | 1.27 | 0.25 | 20 |
| 22 F54C9.5 | GHEELTGEDYNVEEEGDRAPFK    | 51  | 19703  | 1.27 | 0.10 | 8  |
| 1 F54C9.5  | HVADYMTYLK                | 15  | 1797   | 1.27 | 0.13 | 10 |
| 10 F54C9.5 | EYNAEAHRDRILGK            | 17  | 10302  | 1.27 | 0.12 | 9  |
| 1 F54C9.5  | ALLQLK                    | 17  | 784    | 1.27 | 0.07 | 6  |
| 1 F54C9.5  | GVADGGINVPHSESRRFFGFDQESK | 22  | 2155   | 1.28 | 0.14 | 11 |
| 22 F54C9.5 | HVADYMTYLK                | 19  | 1313   | 1.28 | 0.05 | 4  |
| 22 F54C9.5 | GHEELTGEDYNVEEEGDRAPFK    | 41  | 24004  | 1.29 | 0.14 | 11 |

|            |                         |     |        |      |      |    |
|------------|-------------------------|-----|--------|------|------|----|
| 22 F54C9.5 | DVVAQLAYSK              | 49  | 4480   | 1.29 | 0.13 | 10 |
| 1 F54C9.5  | GHEELTGEDYNVEEEGDRAPFK  | 12  | 2543   | 1.29 | 0.20 | 15 |
| 22 F54C9.5 | DVVAQLAYSK              | 68  | 4521   | 1.29 | 0.10 | 7  |
| 1 F54C9.5  | FLAAGLNADNLVATYQK       | 59  | 734    | 1.30 | 0.20 | 16 |
| 22 F54C9.5 | IEGDVVVASAYSHELPRYGLK   | 11  | 4892   | 1.30 | 0.08 | 6  |
| 22 F54C9.5 | ALLQLK                  | 25  | 1799   | 1.31 | 0.07 | 5  |
| 1 F54C9.5  | VHSAIRADASPAAK          | 14  | 4578   | 1.31 | 0.23 | 18 |
| 10 F54C9.5 | FLAAGLNADNLVATYQK       | 20  | 1026   | 1.31 | 0.17 | 13 |
| 10 F54C9.5 | FLAAGLNADNLVATYQK       | 19  | 1430   | 1.31 | 0.09 | 7  |
| 1 F54C9.5  | GHEELTGEDYNVEEEGDRAPFK  | 55  | 13973  | 1.31 | 0.15 | 11 |
| 22 F54C9.5 | FLAAGLNADNLVATYQK       | 49  | 2899   | 1.31 | 0.12 | 9  |
| 10 F54C9.5 | GHEELTGEDYNVEEEGDRAPFK  | 63  | 21575  | 1.32 | 0.09 | 7  |
| 10 F54C9.5 | DVVAQLAYSK              | 18  | 2663   | 1.33 | 0.09 | 7  |
| 1 F54C9.5  | FLAAGLNADNLVATYQK       | 68  | 1939   | 1.33 | 0.18 | 13 |
| 7 F54C9.5  | GHEELTGEDYNVEEEGDRAPFK  | 32  | 3887   | 1.33 | 0.14 | 10 |
| 1 F54C9.5  | FLAAGLNADNLVATYQK       | 82  | 2156   | 1.33 | 0.17 | 13 |
| 10 F54C9.5 | VHSAIRADASPAAK          | 22  | 97117  | 1.33 | 0.15 | 12 |
| 7 F54C9.5  | IFAVMK                  | 11  | 4483   | 1.34 | 0.13 | 10 |
| 10 F54C9.5 | GVADGGINVPSESRRFFGDQESK | 26  | 19451  | 1.34 | 0.21 | 16 |
| 10 F54C9.5 | DVVAQLAYSK              | 14  | 1615   | 1.34 | 0.13 | 10 |
| 7 F54C9.5  | AVLDIGLARTTTGSK         | 29  | 4790   | 1.34 | 0.06 | 5  |
| 1 F54C9.5  | GHEELTGEDYNVEEEGDRAPFK  | 69  | 25452  | 1.35 | 0.08 | 6  |
| 10 F54C9.5 | GHEELTGEDYNVEEEGDRAPFK  | 54  | 15303  | 1.35 | 0.14 | 10 |
| 1 F54C9.5  | FLAAGLNADNLVATYQK       | 61  | 676    | 1.36 | 0.22 | 16 |
| 22 F54C9.5 | HVADYMTYLK              | 15  | 13916  | 1.36 | 0.12 | 9  |
| 1 F54C9.5  | HVADYMTYLK              | 16  | 1821   | 1.37 | 0.10 | 7  |
| 10 F54C9.5 | HVADYMTYLK              | 25  | 5529   | 1.37 | 0.10 | 7  |
| 22 F54C9.5 | AVLDIGLARTTTGSK         | 58  | 9325   | 1.37 | 0.13 | 9  |
| 7 F54C9.5  | HVADYMTYLK              | 25  | 2377   | 1.38 | 0.27 | 20 |
| 22 F54C9.5 | ALLQLK                  | 56  | 1788   | 1.38 | 0.11 | 8  |
| 22 F54C9.5 | FLAAGLNADNLVATYQK       | 101 | 5262   | 1.39 | 0.13 | 10 |
| 1 F54C9.5  | GVADGGINVPSESRRFFGDQESK | 16  | 4508   | 1.39 | 0.19 | 14 |
| 22 F54C9.5 | AVLDIGLARTTTGSK         | 39  | 2578   | 1.40 | 0.27 | 20 |
| 22 F54C9.5 | HVADYMTYLK              | 14  | 16888  | 1.40 | 0.06 | 4  |
| 7 F54C9.5  | RLTYDERK                | 22  | 1822   | 1.41 | 0.10 | 7  |
| 1 F54C9.5  | VHSAIRADASPAAK          | 53  | 6787   | 1.42 | 0.22 | 16 |
| 1 F54C9.5  | HVADYMTYLK              | 19  | 3429   | 1.43 | 0.09 | 6  |
| 7 F54C9.5  | FLAAGLNADNLVATYQK       | 77  | 2012   | 1.44 | 0.17 | 12 |
| 22 F54C9.5 | HVADYMTYLK              | 17  | 1646   | 1.44 | 0.12 | 9  |
| 1 F54C9.5  | VHSAIRADASPAAK          | 22  | 204718 | 1.45 | 0.10 | 7  |
| 10 F54C9.5 | HVADYMTYLK              | 50  | 39649  | 1.45 | 0.04 | 3  |
| 22 F54C9.5 | GHEELTGEDYNVEEEGDRAPFK  | 30  | 11472  | 1.45 | 0.16 | 11 |
| 1 F54C9.5  | HVADYMTYLK              | 62  | 5020   | 1.46 | 0.09 | 6  |
| 7 F54C9.5  | HVADYMTYLK              | 27  | 2249   | 1.46 | 0.08 | 5  |
| 22 F54C9.5 | ALLQLK                  | 40  | 1289   | 1.47 | 0.11 | 8  |
| 22 F54C9.5 | GHEELTGEDYNVEEEGDRAPFK  | 49  | 15195  | 1.47 | 0.11 | 7  |
| 10 F54C9.5 | HVADYMTYLK              | 62  | 20657  | 1.47 | 0.07 | 5  |
| 22 F54C9.5 | ALLQLK                  | 45  | 1745   | 1.48 | 0.19 | 13 |
| 7 F54C9.5  | AVLDIGLARTTTGSK         | 55  | 6202   | 1.48 | 0.08 | 5  |
| 22 F54C9.5 | GVADGGINVPSESRRFFGDQESK | 14  | 12169  | 1.50 | 0.12 | 8  |
| 7 F54C9.5  | TIGLDSTYK               | 65  | 14398  | 1.50 | 0.07 | 5  |
| 22 F54C9.5 | HVADYMTYLK              | 22  | 2494   | 1.50 | 0.11 | 7  |
| 22 F54C9.5 | RLTVQDK                 | 27  | 3259   | 1.51 | 0.11 | 7  |
| 10 F54C9.5 | ALLQLK                  | 13  | 797    | 1.51 | 0.06 | 4  |
| 22 F54C9.5 | GVADGGINVPSESRRFFGDQESK | 16  | 5491   | 1.52 | 0.16 | 11 |
| 10 F54C9.5 | AVLDIGLARTTTGSK         | 28  | 5831   | 1.53 | 0.13 | 8  |
| 7 F54C9.5  | TIGLDSTYK               | 39  | 5258   | 1.54 | 0.10 | 7  |
| 7 F54C9.5  | RLTYDERK                | 15  | 1107   | 1.55 | 0.16 | 10 |
| 10 F54C9.5 | HVADYMTYLK              | 36  | 7501   | 1.55 | 0.23 | 15 |
| 7 F54C9.5  | VHSAIRADASPAAK          | 15  | 33731  | 1.56 | 0.24 | 15 |
| 22 F54C9.5 | HVADYMTYLK              | 21  | 2042   | 1.56 | 0.13 | 9  |
| 7 F54C9.5  | GHEELTGEDYNVEEEGDRAPFK  | 53  | 17735  | 1.56 | 0.14 | 9  |
| 10 F54C9.5 | AVLDIGLARTTTGSK         | 29  | 9131   | 1.57 | 0.14 | 9  |
| 10 F54C9.5 | GHEELTGEDYNVEEEGDRAPFK  | 49  | 13086  | 1.57 | 0.20 | 13 |
| 10 F54C9.5 | GVADGGINVPSESRRFFGDQESK | 16  | 8558   | 1.58 | 0.15 | 9  |
| 10 F54C9.5 | GHEELTGEDYNVEEEGDRAPFK  | 50  | 15073  | 1.60 | 0.10 | 6  |
| 7 F54C9.5  | FLAAGLNADNLVATYQK       | 13  | 1228   | 1.60 | 0.26 | 16 |
| 10 F54C9.5 | FLAAGLNADNLVATYQK       | 82  | 1203   | 1.61 | 0.22 | 14 |
| 10 F54C9.5 | HVADYMTYLK              | 37  | 33284  | 1.61 | 0.07 | 5  |
| 10 F54C9.5 | IFAVMK                  | 12  | 2140   | 1.62 | 0.14 | 9  |
| 1 F54C9.5  | FLAAGLNADNLVATYQK       | 25  | 441    | 1.62 | 0.42 | 26 |
| 1 F54C9.5  | HVADYMTYLK              | 43  | 3982   | 1.63 | 0.07 | 4  |
| 1 F54C9.5  | ALLQLK                  | 69  | 3902   | 1.63 | 0.07 | 5  |
| 1 F54C9.5  | AVLDIGLARTTTGSK         | 40  | 7989   | 1.64 | 0.18 | 11 |
| 10 F54C9.5 | GHEELTGEDYNVEEEGDRAPFK  | 39  | 20482  | 1.66 | 0.10 | 6  |
| 10 F54C9.5 | VHSAIRADASPAAK          | 18  | 78047  | 1.66 | 0.06 | 4  |
| 22 F54C9.5 | AVLDIGLARTTTGSK         | 16  | 2256   | 1.68 | 0.21 | 13 |
| 1 F54C9.5  | HVADYMTYLK              | 21  | 2086   | 1.68 | 0.31 | 18 |
| 22 F54C9.5 | VHSAIRADASPAAK          | 36  | 10344  | 1.69 | 0.06 | 3  |
| 10 F54C9.5 | HVADYMTYLK              | 38  | 4825   | 1.72 | 0.08 | 5  |
| 7 F54C9.5  | RLTYDERK                | 22  | 18834  | 1.73 | 0.10 | 6  |
| 22 F54C9.5 | HVADYMTYLK              | 11  | 2486   | 1.73 | 0.11 | 6  |
| 22 F54C9.5 | RLTYDERK                | 25  | 1300   | 1.74 | 0.21 | 12 |
| 10 F54C9.5 | GHEELTGEDYNVEEEGDRAPFK  | 46  | 7944   | 1.75 | 0.08 | 4  |
| 10 F54C9.5 | FLAAGLNADNLVATYQK       | 26  | 1640   | 1.76 | 0.17 | 10 |
| 1 F54C9.5  | HVADYMTYLK              | 21  | 2780   | 1.76 | 0.13 | 8  |
| 1 F54C9.5  | FLAAGLNADNLVATYQK       | 57  | 501    | 1.76 | 0.11 | 6  |
| 22 F54C9.5 | EYNAEAHRDRILGK          | 13  | 4073   | 1.77 | 0.18 | 10 |
| 10 F54C9.5 | HVADYMTYLK              | 43  | 12772  | 1.78 | 0.11 | 6  |
| 10 F54C9.5 | ALLQLK                  | 58  | 13039  | 1.78 | 0.05 | 3  |
| 7 F54C9.5  | GHEELTGEDYNVEEEGDRAPFK  | 59  | 14586  | 1.79 | 0.16 | 9  |
| 1 F54C9.5  | HVADYMTYLK              | 29  | 3099   | 1.79 | 0.12 | 7  |
| 1 F54C9.5  | HVADYMTYLK              | 21  | 2442   | 1.80 | 0.24 | 13 |
| 22 F54C9.5 | ALLQLK                  | 53  | 14823  | 1.83 | 0.05 | 3  |
| 7 F54C9.5  | AVLDIGLARTTTGSK         | 11  | 2064   | 1.84 | 0.13 | 7  |
| 7 F54C9.5  | HVADYMTYLK              | 39  | 17248  | 1.84 | 0.11 | 6  |
| 10 F54C9.5 | IFAVMK                  | 16  | 928    | 1.85 | 0.32 | 17 |
| 10 F54C9.5 | EYNAEAHRDRILGK          | 13  | 7653   | 1.86 | 0.25 | 14 |
| 10 F54C9.5 | ALLQLK                  | 57  | 8484   | 1.87 | 0.05 | 3  |
| 22 F54C9.5 | ALLQLK                  | 19  | 1281   | 1.87 | 0.13 | 7  |
| 7 F54C9.5  | FLAAGLNADNLVATYQK       | 38  | 1434   | 1.88 | 0.20 | 11 |

|            |                           |     |        |      |      |    |
|------------|---------------------------|-----|--------|------|------|----|
| 1 F54C9.5  | HVADYMTYLK                | 31  | 3020   | 1.89 | 0.12 | 6  |
| 7 F54C9.5  | VHSAIRADASPAAK            | 12  | 22905  | 1.89 | 0.06 | 3  |
| 10 F54C9.5 | GVADGGINVPHSESRRFFGFDQESK | 14  | 7716   | 1.89 | 0.10 | 5  |
| 1 F54C9.5  | FLAAGLNADNLVATYQK         | 56  | 478    | 1.89 | 0.16 | 8  |
| 7 F54C9.5  | HVADYMTYLK                | 27  | 2216   | 1.89 | 0.13 | 7  |
| 10 F54C9.5 | FLAAGLNADNLVATYQK         | 93  | 2283   | 1.90 | 0.10 | 5  |
| 10 F54C9.5 | FLAAGLNADNLVATYQK         | 44  | 2223   | 1.91 | 0.08 | 4  |
| 10 F54C9.5 | FLAAGLNADNLVATYQK         | 76  | 1954   | 1.91 | 0.11 | 6  |
| 22 F54C9.5 | VHSAIRADASPAAK            | 22  | 95456  | 1.92 | 0.13 | 7  |
| 10 F54C9.5 | GHEELTGEDYNVEEEGDRAPFK    | 49  | 2514   | 1.93 | 0.13 | 7  |
| 22 F54C9.5 | IFAVMK                    | 15  | 1665   | 1.93 | 0.23 | 12 |
| 10 F54C9.5 | ALLQLK                    | 50  | 12706  | 1.93 | 0.04 | 2  |
| 22 F54C9.5 | ALLQLK                    | 43  | 6831   | 1.94 | 0.16 | 8  |
| 10 F54C9.5 | ALLQLK                    | 36  | 1335   | 1.94 | 0.10 | 5  |
| 22 F54C9.5 | FLAAGLNADNLVATYQK         | 16  | 1961   | 1.94 | 0.14 | 7  |
| 7 F54C9.5  | HVADYMTYLK                | 42  | 14331  | 1.95 | 0.12 | 6  |
| 10 F54C9.5 | AVLDIGLARTTTGSK           | 38  | 6374   | 1.96 | 0.07 | 4  |
| 10 F54C9.5 | VHSAIRADASPAAK            | 17  | 154686 | 1.96 | 0.10 | 5  |
| 22 F54C9.5 | HVADYMTYLK                | 51  | 3003   | 1.97 | 0.05 | 2  |
| 10 F54C9.5 | HVADYMTYLK                | 34  | 3876   | 1.99 | 0.08 | 4  |
| 7 F54C9.5  | RLTYDERK                  | 16  | 16232  | 2.02 | 0.16 | 8  |
| 10 F54C9.5 | VHSAIRADASPAAK            | 33  | 6404   | 2.02 | 0.10 | 5  |
| 7 F54C9.5  | AVLDIGLARTTTGSK           | 32  | 6205   | 2.04 | 0.17 | 8  |
| 22 F54C9.5 | VHSAIRADASPAAK            | 23  | 133863 | 2.05 | 0.11 | 5  |
| 7 F54C9.5  | VHSAIRADASPAAK            | 46  | 3768   | 2.07 | 0.14 | 7  |
| 10 F54C9.5 | VHSAIRADASPAAK            | 43  | 7206   | 2.07 | 0.16 | 8  |
| 1 F54C9.5  | VHSAIRADASPAAK            | 51  | 9024   | 2.12 | 0.26 | 12 |
| 7 F54C9.5  | ALLQLK                    | 51  | 2639   | 2.13 | 0.07 | 3  |
| 7 F54C9.5  | ALLQLK                    | 46  | 3313   | 2.14 | 0.11 | 5  |
| 22 F54C9.5 | ALLQLK                    | 46  | 5395   | 2.14 | 0.04 | 2  |
| 22 F54C9.5 | AVLDIGLARTTTGSK           | 17  | 2268   | 2.15 | 0.20 | 9  |
| 7 F54C9.5  | GVADGGINVPHSESRRFFGFDQESK | 15  | 5613   | 2.15 | 0.12 | 6  |
| 1 F54C9.5  | HVADYMTYLK                | 54  | 42601  | 2.16 | 0.11 | 5  |
| 7 F54C9.5  | VHSAIRADASPAAK            | 45  | 3136   | 2.17 | 0.14 | 6  |
| 10 F54C9.5 | ALLQLK                    | 31  | 1688   | 2.17 | 0.08 | 4  |
| 10 F54C9.5 | ALLQLK                    | 56  | 8638   | 2.18 | 0.04 | 2  |
| 22 F54C9.5 | AVLDIGLARTTTGSK           | 41  | 6036   | 2.19 | 0.07 | 3  |
| 22 F54C9.5 | VHSAIRADASPAAK            | 48  | 7113   | 2.23 | 0.09 | 4  |
| 22 F54C9.5 | ALLQLK                    | 48  | 13328  | 2.23 | 0.04 | 2  |
| 10 F54C9.5 | GVADGGINVPHSESRRFFGFDQESK | 24  | 11187  | 2.23 | 0.17 | 8  |
| 1 F54C9.5  | FLAAGLNADNLVATYQK         | 52  | 2330   | 2.27 | 0.10 | 4  |
| 1 F54C9.5  | ALLQLK                    | 31  | 1366   | 2.28 | 0.22 | 10 |
| 22 F54C9.5 | AVLDIGLARTTTGSK           | 58  | 8171   | 2.31 | 0.14 | 6  |
| 7 F54C9.5  | HVADYMTYLK                | 54  | 26539  | 2.32 | 0.05 | 2  |
| 1 F54C9.5  | HVADYMTYLK                | 54  | 44566  | 2.33 | 0.04 | 2  |
| 22 F54C9.5 | IFAVMK                    | 16  | 2881   | 2.37 | 0.11 | 5  |
| 10 F54C9.5 | VHSAIRADASPAAK            | 44  | 10237  | 2.40 | 0.11 | 4  |
| 22 F54C9.5 | HVADYMTYLK                | 42  | 3171   | 2.43 | 0.14 | 6  |
| 22 F54C9.5 | IFAVMK                    | 28  | 1997   | 2.44 | 0.15 | 6  |
| 22 F54C9.5 | HVADYMTYLK                | 65  | 49423  | 2.45 | 0.08 | 3  |
| 10 F54C9.5 | VHSAIRADASPAAK            | 41  | 11193  | 2.46 | 0.08 | 3  |
| 10 F54C9.5 | IFAVMK                    | 11  | 1907   | 2.47 | 0.22 | 9  |
| 10 F54C9.5 | HVADYMTYLK                | 15  | 8677   | 2.47 | 0.17 | 7  |
| 7 F54C9.5  | HVADYMTYLK                | 53  | 21984  | 2.48 | 0.04 | 1  |
| 7 F54C9.5  | FLAAGLNADNLVATYQK         | 86  | 1251   | 2.51 | 0.21 | 8  |
| 1 F54C9.5  | ALLQLK                    | 35  | 2440   | 2.51 | 0.14 | 5  |
| 1 F54C9.5  | IFAVMK                    | 13  | 2124   | 2.53 | 0.17 | 7  |
| 10 F54C9.5 | VHSAIRADASPAAK            | 16  | 29197  | 2.56 | 0.11 | 4  |
| 10 F54C9.5 | IFAVMK                    | 13  | 1227   | 2.58 | 0.09 | 4  |
| 1 F54C9.5  | FLAAGLNADNLVATYQK         | 44  | 2476   | 2.67 | 0.22 | 8  |
| 7 F54C9.5  | HVADYMTYLK                | 35  | 2477   | 2.69 | 0.13 | 5  |
| 22 F54C9.5 | HVADYMTYLK                | 45  | 10482  | 2.71 | 0.07 | 3  |
| 7 F54C9.5  | FLAAGLNADNLVATYQK         | 107 | 1920   | 2.74 | 0.15 | 6  |
| 1 F54C9.5  | HVADYMTYLK                | 13  | 1311   | 2.76 | 0.20 | 7  |
| 22 F54C9.5 | VHSAIRADASPAAK            | 11  | 4678   | 2.77 | 0.13 | 5  |
| 22 F54C9.5 | HVADYMTYLK                | 63  | 40971  | 2.77 | 0.09 | 3  |
| 1 F54C9.5  | HVADYMTYLK                | 32  | 3674   | 2.78 | 0.15 | 5  |
| 10 F54C9.5 | VHSAIRADASPAAK            | 11  | 8383   | 2.78 | 0.16 | 6  |
| 22 F54C9.5 | HVADYMTYLK                | 41  | 3152   | 2.79 | 0.13 | 5  |
| 10 F54C9.5 | HVADYMTYLK                | 28  | 1689   | 2.95 | 0.11 | 4  |
| 10 F54C9.5 | IFAVMK                    | 16  | 3313   | 3.00 | 0.22 | 7  |
| 7 F54C9.5  | VHSAIRADASPAAK            | 38  | 1744   | 3.02 | 0.15 | 5  |
| 10 F54C9.5 | ALLQLK                    | 59  | 5023   | 3.11 | 0.06 | 2  |
| 10 F54C9.5 | HVADYMTYLK                | 40  | 9351   | 3.16 | 0.07 | 2  |
| 22 F54C9.5 | HVADYMTYLK                | 48  | 6591   | 3.19 | 0.08 | 3  |
| 10 F54C9.5 | GHEELTGEDYNVEEEGDRAPFK    | 33  | 3102   | 3.25 | 0.16 | 5  |
| 22 F54C9.5 | VHSAIRADASPAAK            | 46  | 5503   | 3.36 | 0.12 | 4  |
| 7 F54C9.5  | HVADYMTYLK                | 32  | 5104   | 3.37 | 0.09 | 3  |
| 22 F54C9.5 | VHSAIRADASPAAK            | 28  | 5893   | 3.38 | 0.15 | 4  |
| 7 F54C9.5  | VHSAIRADASPAAK            | 50  | 3046   | 3.40 | 0.10 | 3  |
| 22 F54C9.5 | HVADYMTYLK                | 39  | 5127   | 3.41 | 0.09 | 3  |
| 10 F54C9.5 | HVADYMTYLK                | 52  | 12548  | 3.42 | 0.19 | 6  |
| 10 F54C9.5 | ALLQLK                    | 52  | 4025   | 3.43 | 0.07 | 2  |
| 7 F54C9.5  | ALLQLK                    | 47  | 3424   | 3.51 | 0.09 | 3  |
| 10 F54C9.5 | HVADYMTYLK                | 78  | 27579  | 3.52 | 0.09 | 3  |
| 10 F54C9.5 | HVADYMTYLK                | 32  | 9568   | 3.52 | 0.05 | 2  |
| 22 F54C9.5 | VHSAIRADASPAAK            | 13  | 23108  | 3.60 | 0.24 | 7  |
| 10 F54C9.5 | HVADYMTYLK                | 14  | 902    | 3.64 | 0.27 | 7  |
| 1 F54C9.5  | HVADYMTYLK                | 18  | 1718   | 3.84 | 0.08 | 2  |
| 1 F54C9.5  | VHSAIRADASPAAK            | 15  | 16730  | 3.84 | 0.18 | 5  |
| 10 F54C9.5 | HVADYMTYLK                | 32  | 16529  | 3.88 | 0.10 | 2  |
| 7 F54C9.5  | HVADYMTYLK                | 19  | 2269   | 3.92 | 0.10 | 2  |
| 7 F54C9.5  | HVADYMTYLK                | 31  | 2310   | 3.92 | 0.17 | 4  |
| 7 F54C9.5  | FLAAGLNADNLVATYQK         | 24  | 1253   | 3.97 | 0.23 | 6  |
| 10 F54C9.5 | IFAVMK                    | 23  | 3730   | 4.09 | 0.17 | 4  |
| 7 F54C9.5  | ALLQLK                    | 40  | 2051   | 4.27 | 0.15 | 3  |
| 10 F54C9.5 | HVADYMTYLK                | 19  | 6360   | 4.86 | 0.10 | 2  |
| 1 F54C9.5  | ALLQLK                    | 26  | 984    | 4.89 | 0.27 | 6  |
| 1 F54C9.5  | FLAAGLNADNLVATYQK         | 53  | 753    | 4.93 | 0.18 | 4  |
| 1 F54C9.5  | FLAAGLNADNLVATYQK         | 86  | 1726   | 4.94 | 0.12 | 2  |
| 7 F54C9.5  | HVADYMTYLK                | 52  | 3585   | 5.30 | 0.08 | 2  |

|             |                      |    |       |       |      |     |
|-------------|----------------------|----|-------|-------|------|-----|
| 7 F54C9.5   | HVADYMTYLK           | 30 | 3075  | 5.71  | 0.10 | 2   |
| 22 F54C9.5  | ALLQLK               | 18 | 1064  | 7.50  | 0.31 | 4   |
| 22 F54C9.5  | ALLQLK               | 29 | 2808  | 9.36  | 0.14 | 2   |
| 22 F54C9.5  | ALLQLK               | 30 | 1771  | 9.51  | 0.21 | 2   |
| 22 F54C9.5  | HVADYMTYLK           | 30 | 3877  | 14.45 | 0.08 | 1   |
| 22 F54C9.5  | HVADYMTYLK           | 28 | 4397  | 20.96 | 0.72 | 3   |
| 1 F54D11.1  | TYVAQRAYFLK          | 22 | 918   | 0.23  | 0.48 | 205 |
| 22 F54D11.1 | EIADIANK             | 47 | 38845 | 0.29  | 0.09 | 29  |
| 10 F54D11.1 | VLITMYGK             | 32 | 1541  | 0.30  | 0.13 | 44  |
| 7 F54D11.1  | TGFVNVQTENMTPRFK     | 28 | 561   | 0.32  | 0.14 | 45  |
| 10 F54D11.1 | VLITMYGK             | 32 | 1636  | 0.34  | 0.21 | 63  |
| 22 F54D11.1 | EIADIANK             | 61 | 48970 | 0.34  | 0.16 | 47  |
| 10 F54D11.1 | VLITMYGK             | 34 | 2748  | 0.35  | 0.14 | 40  |
| 10 F54D11.1 | TYVAQRAYFLK          | 21 | 2288  | 0.35  | 0.18 | 51  |
| 7 F54D11.1  | LFSRIYK              | 13 | 489   | 0.43  | 0.53 | 122 |
| 7 F54D11.1  | VLITMYGK             | 38 | 5863  | 0.45  | 0.09 | 20  |
| 22 F54D11.1 | LFSRIYK              | 14 | 894   | 0.45  | 0.22 | 49  |
| 10 F54D11.1 | LFSRIYK              | 12 | 1498  | 0.47  | 0.23 | 49  |
| 22 F54D11.1 | EIADIANK             | 29 | 22876 | 0.48  | 0.11 | 24  |
| 22 F54D11.1 | EIADIANK             | 27 | 27697 | 0.49  | 0.15 | 31  |
| 22 F54D11.1 | LFSRIYK              | 28 | 53783 | 0.50  | 0.14 | 28  |
| 10 F54D11.1 | VLITMYGK             | 13 | 643   | 0.53  | 0.15 | 28  |
| 22 F54D11.1 | VLITMYGK             | 33 | 1079  | 0.53  | 0.21 | 39  |
| 7 F54D11.1  | LFSRIYK              | 12 | 803   | 0.54  | 0.06 | 12  |
| 7 F54D11.1  | VLITMYGK             | 27 | 3442  | 0.54  | 0.22 | 40  |
| 7 F54D11.1  | LFSRIYK              | 17 | 1743  | 0.54  | 0.11 | 20  |
| 22 F54D11.1 | VLITMYGK             | 31 | 1037  | 0.54  | 0.30 | 55  |
| 22 F54D11.1 | LFSRIYK              | 14 | 1064  | 0.54  | 0.20 | 37  |
| 10 F54D11.1 | LFSRIYK              | 11 | 1191  | 0.55  | 0.09 | 16  |
| 7 F54D11.1  | VLITMYGK             | 25 | 2558  | 0.55  | 0.13 | 24  |
| 22 F54D11.1 | VLITMYGK             | 53 | 10227 | 0.56  | 0.08 | 15  |
| 22 F54D11.1 | TGFVNVQTENMTPRFK     | 65 | 6345  | 0.56  | 0.41 | 72  |
| 7 F54D11.1  | TGFVNVQTENMTPRFK     | 39 | 2550  | 0.58  | 0.17 | 30  |
| 22 F54D11.1 | EILLEERGHLEQNEAEFMSK | 41 | 7356  | 0.59  | 0.21 | 36  |
| 22 F54D11.1 | TGFVNVQTENMTPRFK     | 64 | 5754  | 0.61  | 0.26 | 43  |
| 22 F54D11.1 | TYVAQRAYFLK          | 15 | 880   | 0.61  | 0.28 | 45  |
| 22 F54D11.1 | LFSRIYK              | 24 | 57345 | 0.62  | 0.09 | 15  |
| 22 F54D11.1 | TGFVNVQTENMTPRFK     | 66 | 3383  | 0.63  | 0.09 | 14  |
| 22 F54D11.1 | VTEGRSVSNVQVVSPCQK   | 74 | 25002 | 0.66  | 0.15 | 24  |
| 7 F54D11.1  | VTEGRSVSNVQVVSPCQK   | 29 | 2359  | 0.66  | 0.14 | 21  |
| 7 F54D11.1  | TGFVNVQTENMTPRFK     | 38 | 3817  | 0.68  | 0.09 | 14  |
| 22 F54D11.1 | VTEGRSVSNVQVVSPCQK   | 50 | 21771 | 0.70  | 0.21 | 29  |
| 22 F54D11.1 | TGFVNVQTENMTPRFK     | 36 | 8950  | 0.74  | 0.13 | 18  |
| 10 F54D11.1 | VLITMYGK             | 30 | 941   | 0.74  | 0.09 | 12  |
| 22 F54D11.1 | VLITMYGK             | 67 | 28290 | 0.74  | 0.06 | 9   |
| 22 F54D11.1 | NATNATAIGGTVIREDLK   | 32 | 3547  | 0.74  | 0.14 | 18  |
| 7 F54D11.1  | LFSRIYK              | 23 | 828   | 0.74  | 0.18 | 24  |
| 7 F54D11.1  | TYVAQRAYFLK          | 21 | 3559  | 0.76  | 0.11 | 15  |
| 22 F54D11.1 | TGFVNVQTENMTPRFK     | 81 | 4998  | 0.76  | 0.20 | 27  |
| 22 F54D11.1 | TYVAQRAYFLK          | 18 | 1537  | 0.76  | 0.21 | 27  |
| 22 F54D11.1 | VTEGRSVSNVQVVSPCQK   | 62 | 14206 | 0.77  | 0.15 | 19  |
| 7 F54D11.1  | VTEGRSVSNVQVVSPCQK   | 48 | 8243  | 0.78  | 0.16 | 20  |
| 10 F54D11.1 | TYVAQRAYFLK          | 13 | 1082  | 0.80  | 0.07 | 9   |
| 7 F54D11.1  | VLITMYGK             | 44 | 3280  | 0.82  | 0.22 | 27  |
| 22 F54D11.1 | LFSRIYK              | 13 | 1011  | 0.82  | 0.16 | 20  |
| 7 F54D11.1  | VLITMYGK             | 34 | 3760  | 0.83  | 0.14 | 17  |
| 7 F54D11.1  | TYVAQRAYFLK          | 12 | 1271  | 0.84  | 0.13 | 15  |
| 22 F54D11.1 | VLITMYGK             | 75 | 32308 | 0.84  | 0.04 | 5   |
| 22 F54D11.1 | NATNATAIGGTVIREDLK   | 69 | 2526  | 0.86  | 0.31 | 36  |
| 7 F54D11.1  | VLITMYGK             | 20 | 846   | 0.93  | 0.45 | 48  |
| 7 F54D11.1  | TYVAQRAYFLK          | 12 | 1879  | 0.95  | 0.17 | 18  |
| 22 F54D11.1 | LFSRIYK              | 12 | 1741  | 0.96  | 0.15 | 15  |
| 7 F54D11.1  | VTEGRSVSNVQVVSPCQK   | 32 | 5273  | 1.01  | 0.13 | 13  |
| 22 F54D11.1 | VLITMYGK             | 40 | 1741  | 1.01  | 0.23 | 22  |
| 22 F54D11.1 | NATNATAIGGTVIREDLK   | 58 | 4221  | 1.02  | 0.15 | 15  |
| 22 F54D11.1 | VTEGRSVSNVQVVSPCQK   | 18 | 4117  | 1.05  | 0.22 | 21  |
| 10 F54D11.1 | LFSRIYK              | 14 | 3277  | 1.08  | 0.08 | 8   |
| 10 F54D11.1 | VFAPTTDATITFRDFLDK   | 45 | 4288  | 1.09  | 0.39 | 36  |
| 22 F54D11.1 | DNHNWNFFLAQKPPFK     | 15 | 2481  | 1.13  | 0.06 | 6   |
| 22 F54D11.1 | TYVAQRAYFLK          | 21 | 1241  | 1.17  | 0.16 | 14  |
| 7 F54D11.1  | TYVAQRAYFLK          | 22 | 1259  | 1.19  | 0.25 | 21  |
| 22 F54D11.1 | EILLEERGHLEQNEAEFMSK | 25 | 9142  | 1.22  | 0.08 | 7   |
| 22 F54D11.1 | DNHNWNFFLAQKPPFK     | 19 | 2907  | 1.28  | 0.13 | 10  |
| 22 F54D11.1 | TYVAQRAYFLK          | 14 | 1190  | 1.31  | 0.13 | 10  |
| 7 F54D11.1  | VLITMYGK             | 27 | 4012  | 1.32  | 0.08 | 6   |
| 22 F54D11.1 | EILLEERGHLEQNEAEFMSK | 48 | 14249 | 1.33  | 0.19 | 15  |
| 22 F54D11.1 | TGFVNVQTENMTPRFK     | 32 | 19324 | 1.37  | 0.13 | 9   |
| 7 F54D11.1  | VLITMYGK             | 11 | 771   | 1.43  | 0.22 | 16  |
| 7 F54D11.1  | VLITMYGK             | 37 | 2628  | 1.45  | 0.08 | 6   |
| 7 F54D11.1  | VLITMYGK             | 13 | 1290  | 1.50  | 0.09 | 6   |
| 10 F54D11.1 | TYVAQRAYFLK          | 12 | 1074  | 1.54  | 0.38 | 24  |
| 22 F54D11.1 | NATNATAIGGTVIREDLK   | 59 | 2656  | 1.64  | 0.29 | 18  |
| 22 F54D11.1 | LFSRIYK              | 16 | 892   | 1.65  | 0.18 | 11  |
| 22 F54D11.1 | VFAPTTDATITFRDFLDK   | 18 | 1209  | 1.78  | 0.18 | 10  |
| 22 F54D11.1 | TYVAQRAYFLK          | 12 | 3634  | 1.93  | 0.13 | 7   |
| 22 F54D11.1 | EILLEERGHLEQNEAEFMSK | 31 | 8985  | 1.94  | 0.16 | 8   |
| 10 F54D11.1 | VLITMYGK             | 24 | 3746  | 1.97  | 0.18 | 9   |
| 22 F54D11.1 | EILLEERGHLEQNEAEFMSK | 20 | 5864  | 2.05  | 0.10 | 5   |
| 7 F54D11.1  | VLITMYGK             | 30 | 1308  | 2.13  | 0.24 | 11  |
| 10 F54D11.1 | VLITMYGK             | 19 | 2539  | 2.27  | 0.12 | 5   |
| 22 F54D11.1 | VLITMYGK             | 44 | 2568  | 2.33  | 0.13 | 6   |
| 10 F54D11.1 | EILLEERGHLEQNEAEFMSK | 29 | 6908  | 2.48  | 0.09 | 4   |
| 10 F54D11.1 | EILLEERGHLEQNEAEFMSK | 32 | 5687  | 2.73  | 0.15 | 5   |
| 22 F54D11.1 | VLITMYGK             | 36 | 5224  | 3.11  | 0.14 | 5   |
| 22 F54D11.1 | VLITMYGK             | 36 | 4487  | 3.15  | 0.09 | 3   |
| 10 F54D11.1 | VTEGRSVSNVQVVSPCQK   | 43 | 6171  | 3.69  | 0.14 | 4   |
| 10 F54D11.1 | VLITMYGK             | 26 | 4512  | 4.25  | 0.14 | 3   |
| 10 F54D11.1 | TGFVNVQTENMTPRFK     | 15 | 2648  | 4.77  | 0.16 | 3   |
| 10 F54D11.1 | VLITMYGK             | 22 | 3224  | 5.76  | 0.17 | 3   |
| 10 F54D11.1 | TYVAQRAYFLK          | 38 | 7119  | 5.88  | 0.22 | 4   |
| 10 F54D11.1 | EILLEERGHLEQNEAEFMSK | 31 | 8742  | 6.70  | 0.15 | 2   |

|                      |                      |     |       |       |      |    |
|----------------------|----------------------|-----|-------|-------|------|----|
| 10 F54D11.1          | VLITMYGK             | 32  | 2492  | 11.01 | 0.28 | 3  |
| 10 F54D11.1          | EILLEERGHLEQNEAEFMSK | 42  | 9104  | 11.86 | 0.17 | 1  |
| 22 F54D5.12          | NLIIDGVLAGSSAEATK    | 37  | 623   | 1.07  | 0.24 | 22 |
| 10 F54D5.12          | GPGSVVLYPK           | 18  | 3982  | 1.08  | 0.16 | 15 |
| 10 F54D5.12          | GPGSVVLYPK           | 13  | 3849  | 1.24  | 0.08 | 7  |
| 22 F54D5.7           | YIPDLASGK            | 35  | 8908  | 0.51  | 0.48 | 94 |
| 22 F54D5.7           | YIPDLASGK            | 14  | 3373  | 0.52  | 0.41 | 80 |
| 22 F54D5.7           | VQSEQISIHK           | 33  | 1895  | 0.61  | 0.13 | 21 |
| 22 F54D5.7           | VQSEQISIHK           | 18  | 1480  | 1.08  | 0.18 | 17 |
| 7 F54D5.7            | YIPDLASGK            | 16  | 6430  | 1.12  | 0.11 | 10 |
| 7 F54D5.7            | VQSEQISIHK           | 22  | 1059  | 1.58  | 0.40 | 25 |
| 1 F54D5.7            | YIPDLASGK            | 12  | 1831  | 2.15  | 0.15 | 7  |
| 1 F54D5.7            | YIPDLASGK            | 11  | 2413  | 2.40  | 0.08 | 4  |
| 1 F54D5.7            | VQSEQISIHK           | 18  | 1779  | 2.41  | 0.20 | 8  |
| 10 F54D8.3a;F54D8.3b | VLAQVAEGDK           | 74  | 8972  | 0.26  | 0.18 | 71 |
| 10 F54D8.3a;F54D8.3b | VLAQVAEGDK           | 64  | 8492  | 0.28  | 0.22 | 78 |
| 10 F54D8.3a;F54D8.3b | AVIGDPFDLK           | 21  | 5968  | 0.29  | 0.07 | 23 |
| 10 F54D8.3a;F54D8.3b | AVIGDPFDLK           | 20  | 7242  | 0.38  | 0.20 | 52 |
| 7 F54D8.3a;F54D8.3b  | VLAQVAEGDK           | 41  | 3786  | 0.47  | 0.18 | 38 |
| 22 F54D8.3a;F54D8.3b | IYDDFVARSK           | 18  | 8606  | 0.47  | 0.13 | 28 |
| 10 F54D8.3a;F54D8.3b | VAFTGSTEVGRVLMK      | 60  | 2160  | 0.47  | 0.21 | 46 |
| 1 F54D8.3a;F54D8.3b  | VAEQTPLSALHVAALTK    | 11  | 366   | 0.48  | 0.12 | 25 |
| 22 F54D8.3a;F54D8.3b | QSGIGRELGEYGLEAYTEVK | 30  | 3886  | 0.50  | 0.11 | 21 |
| 7 F54D8.3a;F54D8.3b  | VAEQTPLSALHVAALTK    | 74  | 3074  | 0.52  | 0.22 | 43 |
| 10 F54D8.3a;F54D8.3b | VAFTGSTEVGRVLMK      | 65  | 2390  | 0.52  | 0.25 | 47 |
| 22 F54D8.3a;F54D8.3b | QSGIGRELGEYGLEAYTEVK | 34  | 3670  | 0.53  | 0.19 | 36 |
| 10 F54D8.3a;F54D8.3b | TDVNIAVK             | 29  | 7568  | 0.53  | 0.27 | 51 |
| 22 F54D8.3a;F54D8.3b | VAEQTPLSALHVAALTK    | 79  | 5024  | 0.53  | 0.14 | 27 |
| 10 F54D8.3a;F54D8.3b | VAEQTPLSALHVAALTK    | 102 | 4131  | 0.55  | 0.13 | 23 |
| 10 F54D8.3a;F54D8.3b | AVIGDPFDLK           | 22  | 2672  | 0.56  | 0.08 | 15 |
| 10 F54D8.3a;F54D8.3b | VAEQTPLSALHVAALTK    | 83  | 5605  | 0.57  | 0.17 | 30 |
| 1 F54D8.3a;F54D8.3b  | VLAQVAEGDK           | 34  | 1549  | 0.57  | 0.11 | 20 |
| 22 F54D8.3a;F54D8.3b | TDVNIAVK             | 25  | 5873  | 0.61  | 0.18 | 29 |
| 7 F54D8.3a;F54D8.3b  | VLAQVAEGDK           | 36  | 3531  | 0.61  | 0.16 | 26 |
| 22 F54D8.3a;F54D8.3b | VLAQVAEGDK           | 30  | 1911  | 0.61  | 0.15 | 24 |
| 10 F54D8.3a;F54D8.3b | VAEQTPLSALHVAALTK    | 84  | 5162  | 0.63  | 0.21 | 34 |
| 22 F54D8.3a;F54D8.3b | TLRYYAGWADK          | 25  | 2622  | 0.64  | 0.12 | 19 |
| 7 F54D8.3a;F54D8.3b  | VAEQTPLSALHVAALTK    | 63  | 4853  | 0.64  | 0.21 | 32 |
| 22 F54D8.3a;F54D8.3b | VAEQTPLSALHVAALTK    | 50  | 3086  | 0.66  | 0.16 | 24 |
| 1 F54D8.3a;F54D8.3b  | VAEQTPLSALHVAALTK    | 16  | 1104  | 0.67  | 0.24 | 36 |
| 10 F54D8.3a;F54D8.3b | VAEQTPLSALHVAALTK    | 45  | 4093  | 0.67  | 0.10 | 15 |
| 10 F54D8.3a;F54D8.3b | VAEQTPLSALHVAALTK    | 57  | 3542  | 0.68  | 0.15 | 22 |
| 1 F54D8.3a;F54D8.3b  | AVIGDPFDLK           | 15  | 1519  | 0.68  | 0.09 | 14 |
| 22 F54D8.3a;F54D8.3b | IYDDFVARSK           | 24  | 4338  | 0.68  | 0.19 | 28 |
| 7 F54D8.3a;F54D8.3b  | VAEQTPLSALHVAALTK    | 56  | 1697  | 0.69  | 0.20 | 28 |
| 22 F54D8.3a;F54D8.3b | AVIGDPFDLK           | 11  | 7226  | 0.69  | 0.05 | 8  |
| 22 F54D8.3a;F54D8.3b | TLRYYAGWADK          | 12  | 2540  | 0.70  | 0.17 | 24 |
| 1 F54D8.3a;F54D8.3b  | IYDDFVARSK           | 23  | 2064  | 0.71  | 0.12 | 17 |
| 22 F54D8.3a;F54D8.3b | VLAQVAEGDK           | 48  | 2676  | 0.73  | 0.12 | 16 |
| 22 F54D8.3a;F54D8.3b | AVIGDPFDLK           | 16  | 5771  | 0.73  | 0.31 | 43 |
| 10 F54D8.3a;F54D8.3b | IYDDFVARSK           | 34  | 2643  | 0.74  | 0.18 | 24 |
| 10 F54D8.3a;F54D8.3b | IYDDFVARSK           | 37  | 3694  | 0.75  | 0.10 | 13 |
| 7 F54D8.3a;F54D8.3b  | VAEQTPLSALHVAALTK    | 57  | 2996  | 0.75  | 0.21 | 27 |
| 22 F54D8.3a;F54D8.3b | VLAQVAEGDK           | 50  | 3158  | 0.75  | 0.11 | 15 |
| 22 F54D8.3a;F54D8.3b | IYDDFVARSK           | 19  | 3405  | 0.75  | 0.18 | 24 |
| 1 F54D8.3a;F54D8.3b  | VAEQTPLSALHVAALTK    | 36  | 1302  | 0.76  | 0.17 | 23 |
| 22 F54D8.3a;F54D8.3b | IYDDFVARSK           | 20  | 3002  | 0.76  | 0.19 | 25 |
| 1 F54D8.3a;F54D8.3b  | VAEQTPLSALHVAALTK    | 46  | 1480  | 0.77  | 0.21 | 27 |
| 22 F54D8.3a;F54D8.3b | LGPALAMGNTVVMK       | 55  | 1315  | 0.77  | 0.14 | 18 |
| 10 F54D8.3a;F54D8.3b | TLRYYAGWADK          | 31  | 2110  | 0.78  | 0.25 | 32 |
| 22 F54D8.3a;F54D8.3b | VAFTGSTEVGRVLMK      | 47  | 1778  | 0.78  | 0.19 | 24 |
| 7 F54D8.3a;F54D8.3b  | VAEQTPLSALHVAALTK    | 63  | 3310  | 0.78  | 0.27 | 35 |
| 10 F54D8.3a;F54D8.3b | VAEQTPLSALHVAALTK    | 68  | 3988  | 0.79  | 0.15 | 19 |
| 7 F54D8.3a;F54D8.3b  | VAEQTPLSALHVAALTK    | 50  | 1597  | 0.79  | 0.12 | 15 |
| 22 F54D8.3a;F54D8.3b | TLRYYAGWADK          | 23  | 2313  | 0.79  | 0.20 | 26 |
| 10 F54D8.3a;F54D8.3b | HGDQGHFVKPTIFANVK    | 17  | 33355 | 0.80  | 0.31 | 39 |
| 7 F54D8.3a;F54D8.3b  | IYDDFVARSK           | 13  | 2490  | 0.81  | 0.12 | 14 |
| 1 F54D8.3a;F54D8.3b  | VAEQTPLSALHVAALTK    | 33  | 1512  | 0.81  | 0.14 | 17 |
| 10 F54D8.3a;F54D8.3b | VAEQTPLSALHVAALTK    | 49  | 1553  | 0.81  | 0.10 | 12 |
| 10 F54D8.3a;F54D8.3b | VAFTGSTEVGRVLMK      | 21  | 3342  | 0.83  | 0.26 | 32 |
| 22 F54D8.3a;F54D8.3b | LGPALAMGNTVVMK       | 33  | 1048  | 0.84  | 0.27 | 32 |
| 1 F54D8.3a;F54D8.3b  | VLAQVAEGDK           | 35  | 1235  | 0.84  | 0.08 | 10 |
| 22 F54D8.3a;F54D8.3b | VAFTGSTEVGRVLMK      | 65  | 3974  | 0.84  | 0.07 | 9  |
| 1 F54D8.3a;F54D8.3b  | IYDDFVARSK           | 13  | 2123  | 0.84  | 0.12 | 14 |
| 10 F54D8.3a;F54D8.3b | VAEQTPLSALHVAALTK    | 65  | 4426  | 0.85  | 0.10 | 12 |
| 1 F54D8.3a;F54D8.3b  | VAEQTPLSALHVAALTK    | 45  | 1461  | 0.87  | 0.17 | 20 |
| 22 F54D8.3a;F54D8.3b | VAEQTPLSALHVAALTK    | 86  | 4954  | 0.87  | 0.20 | 23 |
| 1 F54D8.3a;F54D8.3b  | AVIGDPFDLK           | 18  | 1447  | 0.88  | 0.25 | 28 |
| 22 F54D8.3a;F54D8.3b | IYDDFVARSK           | 34  | 4190  | 0.89  | 0.21 | 24 |
| 22 F54D8.3a;F54D8.3b | IYDDFVARSK           | 23  | 2141  | 0.90  | 0.14 | 15 |
| 22 F54D8.3a;F54D8.3b | VAEQTPLSALHVAALTK    | 86  | 7069  | 0.91  | 0.15 | 17 |
| 10 F54D8.3a;F54D8.3b | VLAQVAEGDK           | 24  | 1878  | 0.91  | 0.13 | 14 |
| 10 F54D8.3a;F54D8.3b | IYDDFVARSK           | 20  | 1932  | 0.92  | 0.23 | 25 |
| 1 F54D8.3a;F54D8.3b  | AVIGDPFDLK           | 11  | 1831  | 0.92  | 0.11 | 12 |
| 10 F54D8.3a;F54D8.3b | VLAQVAEGDK           | 50  | 2054  | 0.92  | 0.14 | 15 |
| 22 F54D8.3a;F54D8.3b | VAEQTPLSALHVAALTK    | 65  | 6020  | 0.93  | 0.16 | 17 |
| 7 F54D8.3a;F54D8.3b  | IYDDFVARSK           | 18  | 1913  | 0.94  | 0.15 | 16 |
| 10 F54D8.3a;F54D8.3b | IYDDFVARSK           | 28  | 3255  | 0.94  | 0.21 | 22 |
| 1 F54D8.3a;F54D8.3b  | IYDDFVARSK           | 11  | 2801  | 0.94  | 0.10 | 11 |
| 1 F54D8.3a;F54D8.3b  | IYDDFVARSK           | 15  | 2127  | 0.94  | 0.23 | 25 |
| 1 F54D8.3a;F54D8.3b  | VLAQVAEGDK           | 35  | 855   | 0.95  | 0.11 | 12 |
| 7 F54D8.3a;F54D8.3b  | IYDDFVARSK           | 29  | 3020  | 0.95  | 0.17 | 17 |
| 1 F54D8.3a;F54D8.3b  | VAEQTPLSALHVAALTK    | 46  | 2740  | 0.96  | 0.18 | 19 |
| 10 F54D8.3a;F54D8.3b | TLRYYAGWADK          | 30  | 1640  | 0.96  | 0.11 | 11 |
| 10 F54D8.3a;F54D8.3b | AVIGDPFDLK           | 12  | 3877  | 0.96  | 0.30 | 31 |
| 10 F54D8.3a;F54D8.3b | VLAQVAEGDK           | 29  | 2265  | 0.97  | 0.12 | 12 |
| 22 F54D8.3a;F54D8.3b | VAEQTPLSALHVAALTK    | 76  | 4264  | 0.97  | 0.12 | 12 |
| 22 F54D8.3a;F54D8.3b | VAFTGSTEVGRVLMK      | 62  | 3554  | 0.97  | 0.13 | 14 |
| 10 F54D8.3a;F54D8.3b | VAEQTPLSALHVAALTK    | 48  | 2017  | 0.97  | 0.14 | 14 |
| 7 F54D8.3a;F54D8.3b  | IYDDFVARSK           | 19  | 1513  | 0.98  | 0.12 | 12 |
| 7 F54D8.3a;F54D8.3b  | TLRYYAGWADK          | 25  | 3168  | 0.98  | 0.25 | 25 |

|                        |                         |     |       |      |      |    |
|------------------------|-------------------------|-----|-------|------|------|----|
| 22 F54D8.3a;F54D8.3b   | IYDDFVARSK              | 23  | 1726  | 0.98 | 0.20 | 21 |
| 7 F54D8.3a;F54D8.3b    | TLRYYAGWADK             | 19  | 2606  | 0.98 | 0.18 | 18 |
| 10 F54D8.3a;F54D8.3b   | VAEQTPLSALHVAALTK       | 67  | 5685  | 1.01 | 0.12 | 12 |
| 1 F54D8.3a;F54D8.3b    | VAEQTPLSALHVAALTK       | 47  | 1909  | 1.03 | 0.17 | 17 |
| 7 F54D8.3a;F54D8.3b    | AVIGDPFDLK              | 23  | 5728  | 1.06 | 0.16 | 15 |
| 1 F54D8.3a;F54D8.3b    | VAEQTPLSALHVAALTK       | 23  | 1622  | 1.07 | 0.17 | 16 |
| 22 F54D8.3a;F54D8.3b   | IYDDFVARSK              | 28  | 2393  | 1.09 | 0.20 | 18 |
| 22 F54D8.3a;F54D8.3b   | VLAQVAEGDK              | 53  | 3082  | 1.10 | 0.10 | 9  |
| 7 F54D8.3a;F54D8.3b    | VAEQTPLSALHVAALTK       | 29  | 3128  | 1.15 | 0.21 | 18 |
| 7 F54D8.3a;F54D8.3b    | AVIGDPFDLK              | 28  | 5976  | 1.16 | 0.03 | 2  |
| 1 F54D8.3a;F54D8.3b    | VAEQTPLSALHVAALTK       | 58  | 2339  | 1.16 | 0.12 | 11 |
| 7 F54D8.3a;F54D8.3b    | VAEQTPLSALHVAALTK       | 50  | 3338  | 1.17 | 0.13 | 11 |
| 1 F54D8.3a;F54D8.3b    | IYDDFVARSK              | 16  | 1662  | 1.20 | 0.13 | 11 |
| 22 F54D8.3a;F54D8.3b   | IYDDFVARSK              | 16  | 1476  | 1.20 | 0.14 | 12 |
| 7 F54D8.3a;F54D8.3b    | VAEQTPLSALHVAALTK       | 53  | 3264  | 1.23 | 0.08 | 7  |
| 22 F54D8.3a;F54D8.3b   | VAEQTPLSALHVAALTK       | 55  | 2998  | 1.23 | 0.15 | 12 |
| 22 F54D8.3a;F54D8.3b   | VLAQVAEGDK              | 46  | 10472 | 1.24 | 0.09 | 7  |
| 22 F54D8.3a;F54D8.3b   | TLRYYAGWADK             | 40  | 2569  | 1.32 | 0.10 | 8  |
| 10 F54D8.3a;F54D8.3b   | HGDQGHFVKPTIFANVK       | 25  | 29953 | 1.33 | 0.33 | 25 |
| 10 F54D8.3a;F54D8.3b   | IYDDFVARSK              | 14  | 1951  | 1.35 | 0.15 | 11 |
| 22 F54D8.3a;F54D8.3b   | VLAQVAEGDK              | 59  | 7155  | 1.36 | 0.05 | 4  |
| 1 F54D8.3a;F54D8.3b    | VAEQTPLSALHVAALTK       | 57  | 2896  | 1.38 | 0.18 | 13 |
| 7 F54D8.3a;F54D8.3b    | IYDDFVARSK              | 21  | 2966  | 1.38 | 0.10 | 7  |
| 7 F54D8.3a;F54D8.3b    | IYDDFVARSK              | 13  | 2555  | 1.46 | 0.23 | 16 |
| 22 F54D8.3a;F54D8.3b   | TLRYYAGWADK             | 14  | 2161  | 1.51 | 0.17 | 11 |
| 7 F54D8.3a;F54D8.3b    | VAFTGSTEVGRLVMK         | 12  | 464   | 1.60 | 0.26 | 16 |
| 22 F54D8.3a;F54D8.3b   | TLRYYAGWADK             | 32  | 2459  | 1.62 | 0.12 | 7  |
| 1 F54D8.3a;F54D8.3b    | IYDDFVARSK              | 42  | 1986  | 1.67 | 0.14 | 8  |
| 7 F54D8.3a;F54D8.3b    | VAEQTPLSALHVAALTK       | 13  | 1852  | 1.79 | 0.12 | 7  |
| 1 F54D8.3a;F54D8.3b    | VAEQTPLSALHVAALTK       | 47  | 1677  | 1.84 | 0.11 | 6  |
| 10 F54D8.3a;F54D8.3b   | IYDDFVARSK              | 21  | 2237  | 1.87 | 0.12 | 7  |
| 1 F54D8.3a;F54D8.3b    | VAEQTPLSALHVAALTK       | 59  | 1980  | 1.98 | 0.14 | 7  |
| 10 F54D8.3a;F54D8.3b   | VLAQVAEGDK              | 54  | 3207  | 2.14 | 0.11 | 5  |
| 10 F54D8.3a;F54D8.3b   | VLAQVAEGDK              | 36  | 1955  | 2.61 | 0.09 | 4  |
| 10 F54D8.3a;F54D8.3b   | VAEQTPLSALHVAALTK       | 54  | 3084  | 2.79 | 0.10 | 4  |
| 10 F54D8.3a;F54D8.3b   | IYDDFVARSK              | 33  | 2539  | 2.94 | 0.25 | 9  |
| 10 F54D8.3a;F54D8.3b   | IYDDFVARSK              | 27  | 2019  | 2.95 | 0.09 | 3  |
| 10 F54D8.3a;F54D8.3b   | VAEQTPLSALHVAALTK       | 41  | 2116  | 3.28 | 0.13 | 4  |
| 7 F54E4.1              | DAVQTLCSK               | 12  | 5110  | 0.54 | 0.08 | 14 |
| 1 F54F3.4              | NVDEAIEYLK              | 33  | 633   | 0.67 | 0.19 | 29 |
| 22 F54F3.4             | VAGIAGHIASTDDQK         | 43  | 2474  | 0.87 | 0.14 | 16 |
| 22 F54F3.4             | LVDFTLQK                | 21  | 740   | 1.08 | 0.17 | 16 |
| 7 F54H12.1a;F54H12.1b  | TIFTITPGSEQVRATIERDGLSK | 11  | 7265  | 0.30 | 0.14 | 47 |
| 7 F54H12.1a;F54H12.1b  | VADILTVK                | 35  | 958   | 0.32 | 0.27 | 84 |
| 10 F54H12.1a;F54H12.1b | VADILTVK                | 26  | 795   | 0.34 | 0.19 | 55 |
| 10 F54H12.1a;F54H12.1b | EVFNFLATAGSK            | 82  | 1021  | 0.37 | 0.22 | 59 |
| 7 F54H12.1a;F54H12.1b  | EVFNFLATAGSK            | 67  | 1072  | 0.37 | 0.22 | 60 |
| 1 F54H12.1a;F54H12.1b  | VADILTVK                | 53  | 1571  | 0.41 | 0.10 | 25 |
| 1 F54H12.1a;F54H12.1b  | VADILTVK                | 27  | 672   | 0.41 | 0.14 | 35 |
| 22 F54H12.1a;F54H12.1b | VADILTVK                | 64  | 4692  | 0.42 | 0.13 | 30 |
| 1 F54H12.1a;F54H12.1b  | LQAPTGLDLPPK            | 24  | 712   | 0.42 | 0.18 | 42 |
| 10 F54H12.1a;F54H12.1b | VADILTVK                | 64  | 3273  | 0.43 | 0.12 | 28 |
| 22 F54H12.1a;F54H12.1b | VADILTVK                | 80  | 4335  | 0.44 | 0.11 | 26 |
| 22 F54H12.1a;F54H12.1b | ILYGHLDQPK              | 25  | 4778  | 0.44 | 0.09 | 21 |
| 10 F54H12.1a;F54H12.1b | TIFTITPGSEQVRATIERDGLSK | 12  | 3322  | 0.45 | 0.20 | 44 |
| 1 F54H12.1a;F54H12.1b  | LQAPTGLDLPPK            | 54  | 2664  | 0.46 | 0.15 | 33 |
| 1 F54H12.1a;F54H12.1b  | VADILTVK                | 50  | 1691  | 0.46 | 0.08 | 17 |
| 1 F54H12.1a;F54H12.1b  | LQAPTGLDLPPK            | 50  | 2176  | 0.46 | 0.11 | 24 |
| 22 F54H12.1a;F54H12.1b | EVFNFLATAGSK            | 70  | 1125  | 0.46 | 0.25 | 54 |
| 22 F54H12.1a;F54H12.1b | VADILTVK                | 26  | 499   | 0.46 | 0.11 | 24 |
| 10 F54H12.1a;F54H12.1b | VADILTVK                | 23  | 804   | 0.47 | 0.15 | 32 |
| 1 F54H12.1a;F54H12.1b  | LQAPTGLDLPPK            | 43  | 1933  | 0.47 | 0.10 | 22 |
| 7 F54H12.1a;F54H12.1b  | YLEATGRK                | 11  | 1208  | 0.47 | 0.18 | 38 |
| 7 F54H12.1a;F54H12.1b  | YLEATGRK                | 19  | 3307  | 0.48 | 0.13 | 28 |
| 10 F54H12.1a;F54H12.1b | VADILTVK                | 59  | 5131  | 0.49 | 0.09 | 18 |
| 1 F54H12.1a;F54H12.1b  | LQAPTGLDLPPK            | 33  | 1699  | 0.49 | 0.11 | 23 |
| 1 F54H12.1a;F54H12.1b  | LQAPTGLDLPPK            | 50  | 1790  | 0.49 | 0.12 | 24 |
| 22 F54H12.1a;F54H12.1b | VADILTVK                | 45  | 1034  | 0.50 | 0.17 | 34 |
| 1 F54H12.1a;F54H12.1b  | LQAPTGLDLPPK            | 36  | 2223  | 0.50 | 0.09 | 19 |
| 1 F54H12.1a;F54H12.1b  | LQAPTGLDLPPK            | 43  | 2047  | 0.51 | 0.21 | 40 |
| 10 F54H12.1a;F54H12.1b | VADILTVK                | 76  | 5984  | 0.53 | 0.10 | 18 |
| 7 F54H12.1a;F54H12.1b  | VADILTVK                | 21  | 741   | 0.54 | 0.10 | 19 |
| 10 F54H12.1a;F54H12.1b | LQAPTGLDLPPK            | 16  | 1293  | 0.54 | 0.40 | 74 |
| 7 F54H12.1a;F54H12.1b  | VADILTVK                | 25  | 892   | 0.55 | 0.15 | 27 |
| 1 F54H12.1a;F54H12.1b  | LQAPTGLDLPPK            | 40  | 1778  | 0.55 | 0.16 | 29 |
| 7 F54H12.1a;F54H12.1b  | GGAQDLARAK              | 27  | 1807  | 0.56 | 0.21 | 38 |
| 22 F54H12.1a;F54H12.1b | ILYGHLDQPK              | 22  | 19818 | 0.56 | 0.16 | 28 |
| 1 F54H12.1a;F54H12.1b  | LQAPTGLDLPPK            | 55  | 2270  | 0.56 | 0.19 | 34 |
| 7 F54H12.1a;F54H12.1b  | TIFTITPGSEQVRATIERDGLSK | 12  | 5094  | 0.57 | 0.19 | 33 |
| 1 F54H12.1a;F54H12.1b  | VADILTVK                | 36  | 591   | 0.57 | 0.13 | 23 |
| 22 F54H12.1a;F54H12.1b | EVFNFLATAGSK            | 108 | 1502  | 0.57 | 0.17 | 29 |
| 22 F54H12.1a;F54H12.1b | QGMMLPTFANPADYDK        | 39  | 1955  | 0.57 | 0.11 | 20 |
| 10 F54H12.1a;F54H12.1b | VADILTVK                | 62  | 2931  | 0.58 | 0.15 | 27 |
| 1 F54H12.1a;F54H12.1b  | LQAPTGLDLPPK            | 19  | 2155  | 0.58 | 0.21 | 36 |
| 10 F54H12.1a;F54H12.1b | YLEATGRK                | 30  | 14440 | 0.58 | 0.10 | 17 |
| 10 F54H12.1a;F54H12.1b | NQVTGEYGAVPATARK        | 13  | 7263  | 0.58 | 0.22 | 37 |
| 22 F54H12.1a;F54H12.1b | ILYGHLDQPK              | 73  | 44109 | 0.59 | 0.06 | 10 |
| 7 F54H12.1a;F54H12.1b  | EVFNFLATAGSK            | 56  | 1293  | 0.59 | 0.22 | 38 |
| 10 F54H12.1a;F54H12.1b | YLEATGRK                | 22  | 12101 | 0.59 | 0.18 | 30 |
| 1 F54H12.1a;F54H12.1b  | EVFNFLATAGSK            | 14  | 283   | 0.59 | 0.21 | 36 |
| 10 F54H12.1a;F54H12.1b | RPLTLSEK                | 14  | 3817  | 0.59 | 0.12 | 21 |
| 22 F54H12.1a;F54H12.1b | NQVTGEYGAVPATARK        | 65  | 10267 | 0.60 | 0.16 | 27 |
| 1 F54H12.1a;F54H12.1b  | LQAPTGLDLPPK            | 47  | 2821  | 0.60 | 0.24 | 39 |
| 7 F54H12.1a;F54H12.1b  | NQVTGEYGAVPATARK        | 48  | 1518  | 0.60 | 0.23 | 39 |
| 1 F54H12.1a;F54H12.1b  | GGAQDLARAK              | 11  | 2203  | 0.61 | 0.20 | 32 |
| 10 F54H12.1a;F54H12.1b | YLEATGRK                | 29  | 3622  | 0.61 | 0.08 | 13 |
| 22 F54H12.1a;F54H12.1b | ILYGHLDQPK              | 62  | 34772 | 0.61 | 0.14 | 23 |
| 22 F54H12.1a;F54H12.1b | TAVPSTIHCDHLIEAQK       | 22  | 22545 | 0.63 | 0.06 | 9  |
| 10 F54H12.1a;F54H12.1b | VADILTVK                | 42  | 1097  | 0.63 | 0.13 | 20 |
| 22 F54H12.1a;F54H12.1b | VADILTVK                | 44  | 1175  | 0.64 | 0.17 | 27 |
| 22 F54H12.1a;F54H12.1b | VADILTVK                | 41  | 857   | 0.64 | 0.05 | 8  |

|                        |                         |    |       |      |      |    |
|------------------------|-------------------------|----|-------|------|------|----|
| 22 F54H12.1a;F54H12.1b | YLEATGRK                | 27 | 3488  | 0.64 | 0.11 | 17 |
| 7 F54H12.1a;F54H12.1b  | GGAQDLARAK              | 39 | 2580  | 0.64 | 0.07 | 11 |
| 7 F54H12.1a;F54H12.1b  | GGAQDLARAK              | 24 | 2094  | 0.65 | 0.12 | 18 |
| 22 F54H12.1a;F54H12.1b | ILYGHLDQPK              | 45 | 21089 | 0.65 | 0.08 | 12 |
| 10 F54H12.1a;F54H12.1b | QGMLPLTFANPADYDK        | 57 | 1277  | 0.66 | 0.12 | 19 |
| 1 F54H12.1a;F54H12.1b  | LQAPTGLDLPPK            | 29 | 2190  | 0.66 | 0.18 | 27 |
| 10 F54H12.1a;F54H12.1b | YLEATGRK                | 27 | 3430  | 0.66 | 0.13 | 20 |
| 10 F54H12.1a;F54H12.1b | SFARIHETNLK             | 13 | 18431 | 0.66 | 0.14 | 21 |
| 10 F54H12.1a;F54H12.1b | VADILTVK                | 52 | 2040  | 0.67 | 0.11 | 17 |
| 22 F54H12.1a;F54H12.1b | VADILTVK                | 48 | 1380  | 0.68 | 0.09 | 13 |
| 10 F54H12.1a;F54H12.1b | EVFNFLATAGSK            | 71 | 812   | 0.68 | 0.23 | 34 |
| 22 F54H12.1a;F54H12.1b | VADILTVK                | 17 | 618   | 0.69 | 0.22 | 32 |
| 22 F54H12.1a;F54H12.1b | EVFNFLATAGSK            | 79 | 2233  | 0.69 | 0.14 | 20 |
| 10 F54H12.1a;F54H12.1b | ILYGHLDQPK              | 24 | 6704  | 0.69 | 0.19 | 28 |
| 7 F54H12.1a;F54H12.1b  | GGAQDLARAK              | 32 | 3110  | 0.70 | 0.23 | 34 |
| 22 F54H12.1a;F54H12.1b | ILYGHLDQPK              | 22 | 20874 | 0.70 | 0.12 | 17 |
| 1 F54H12.1a;F54H12.1b  | LQAPTGLDLPPK            | 18 | 869   | 0.70 | 0.25 | 36 |
| 10 F54H12.1a;F54H12.1b | EVFNFLATAGSK            | 74 | 1110  | 0.70 | 0.07 | 9  |
| 22 F54H12.1a;F54H12.1b | EVFNFLATAGSK            | 83 | 1104  | 0.70 | 0.19 | 27 |
| 10 F54H12.1a;F54H12.1b | EVFNFLATAGSK            | 63 | 2370  | 0.71 | 0.12 | 17 |
| 10 F54H12.1a;F54H12.1b | YLEATGRK                | 17 | 2226  | 0.71 | 0.10 | 14 |
| 1 F54H12.1a;F54H12.1b  | LQAPTGLDLPPK            | 14 | 1011  | 0.71 | 0.30 | 42 |
| 22 F54H12.1a;F54H12.1b | TIFTITPGSEQVRATIERDGLSK | 13 | 12554 | 0.71 | 0.07 | 10 |
| 22 F54H12.1a;F54H12.1b | VADILTVK                | 48 | 1733  | 0.72 | 0.09 | 12 |
| 1 F54H12.1a;F54H12.1b  | LQAPTGLDLPPK            | 11 | 808   | 0.72 | 0.12 | 16 |
| 10 F54H12.1a;F54H12.1b | GGAQDLARAK              | 36 | 2636  | 0.72 | 0.18 | 25 |
| 22 F54H12.1a;F54H12.1b | YLEATGRK                | 26 | 2965  | 0.72 | 0.07 | 10 |
| 22 F54H12.1a;F54H12.1b | YLEATGRK                | 20 | 9229  | 0.72 | 0.08 | 12 |
| 7 F54H12.1a;F54H12.1b  | YLEATGRK                | 30 | 7962  | 0.73 | 0.10 | 14 |
| 1 F54H12.1a;F54H12.1b  | EVFNFLATAGSK            | 43 | 437   | 0.73 | 0.21 | 29 |
| 22 F54H12.1a;F54H12.1b | YLEATGRK                | 15 | 4108  | 0.73 | 0.19 | 25 |
| 7 F54H12.1a;F54H12.1b  | EVFNFLATAGSK            | 57 | 1235  | 0.74 | 0.16 | 22 |
| 1 F54H12.1a;F54H12.1b  | LQAPTGLDLPPK            | 32 | 1421  | 0.74 | 0.24 | 33 |
| 10 F54H12.1a;F54H12.1b | EVFNFLATAGSK            | 96 | 1979  | 0.74 | 0.15 | 20 |
| 10 F54H12.1a;F54H12.1b | ILYGHLDQPK              | 48 | 4060  | 0.74 | 0.15 | 21 |
| 10 F54H12.1a;F54H12.1b | VADILTVK                | 48 | 2212  | 0.74 | 0.15 | 20 |
| 1 F54H12.1a;F54H12.1b  | YLEATGRK                | 27 | 2685  | 0.75 | 0.12 | 16 |
| 1 F54H12.1a;F54H12.1b  | EVFNFLATAGSK            | 49 | 437   | 0.75 | 0.16 | 21 |
| 1 F54H12.1a;F54H12.1b  | LQAPTGLDLPPK            | 21 | 1252  | 0.75 | 0.22 | 29 |
| 10 F54H12.1a;F54H12.1b | VADILTVK                | 37 | 970   | 0.75 | 0.06 | 8  |
| 10 F54H12.1a;F54H12.1b | QGMLPLTFANPADYDK        | 47 | 2499  | 0.75 | 0.17 | 23 |
| 22 F54H12.1a;F54H12.1b | QGMLPLTFANPADYDK        | 53 | 1463  | 0.76 | 0.21 | 28 |
| 10 F54H12.1a;F54H12.1b | GGAQDLARAK              | 55 | 9754  | 0.76 | 0.07 | 9  |
| 10 F54H12.1a;F54H12.1b | EVFNFLATAGSK            | 52 | 1978  | 0.77 | 0.08 | 10 |
| 10 F54H12.1a;F54H12.1b | LQAPTGLDLPPK            | 15 | 1245  | 0.77 | 0.07 | 9  |
| 10 F54H12.1a;F54H12.1b | QGMLPLTFANPADYDK        | 72 | 1635  | 0.77 | 0.13 | 17 |
| 1 F54H12.1a;F54H12.1b  | YLEATGRK                | 12 | 1451  | 0.77 | 0.24 | 31 |
| 10 F54H12.1a;F54H12.1b | YLEATGRK                | 12 | 6751  | 0.78 | 0.08 | 10 |
| 22 F54H12.1a;F54H12.1b | ILYGHLDQPK              | 33 | 3513  | 0.78 | 0.13 | 17 |
| 7 F54H12.1a;F54H12.1b  | VADILTVK                | 29 | 2157  | 0.78 | 0.09 | 11 |
| 10 F54H12.1a;F54H12.1b | VADILTVK                | 13 | 505   | 0.79 | 0.13 | 16 |
| 22 F54H12.1a;F54H12.1b | NQVTGEYGAVPATARK        | 50 | 3053  | 0.79 | 0.16 | 20 |
| 7 F54H12.1a;F54H12.1b  | EVFNFLATAGSK            | 84 | 1264  | 0.79 | 0.25 | 32 |
| 10 F54H12.1a;F54H12.1b | VADILTVK                | 28 | 633   | 0.80 | 0.12 | 15 |
| 10 F54H12.1a;F54H12.1b | EVFNFLATAGSK            | 69 | 755   | 0.80 | 0.25 | 32 |
| 22 F54H12.1a;F54H12.1b | EVFNFLATAGSK            | 75 | 1520  | 0.80 | 0.16 | 20 |
| 10 F54H12.1a;F54H12.1b | VADILTVK                | 59 | 1189  | 0.80 | 0.16 | 20 |
| 7 F54H12.1a;F54H12.1b  | VADILTVK                | 20 | 872   | 0.81 | 0.12 | 15 |
| 22 F54H12.1a;F54H12.1b | LQAPTGLDLPPK            | 12 | 1294  | 0.82 | 0.15 | 18 |
| 10 F54H12.1a;F54H12.1b | GGAQDLARAK              | 18 | 2778  | 0.83 | 0.15 | 18 |
| 7 F54H12.1a;F54H12.1b  | YLEATGRK                | 22 | 8300  | 0.83 | 0.11 | 14 |
| 1 F54H12.1a;F54H12.1b  | GGAQDLARAK              | 28 | 2601  | 0.83 | 0.14 | 17 |
| 1 F54H12.1a;F54H12.1b  | GGAQDLARAK              | 45 | 3689  | 0.83 | 0.11 | 14 |
| 22 F54H12.1a;F54H12.1b | YLEATGRK                | 20 | 8853  | 0.84 | 0.13 | 15 |
| 22 F54H12.1a;F54H12.1b | EVFNFLATAGSK            | 84 | 1143  | 0.84 | 0.13 | 16 |
| 1 F54H12.1a;F54H12.1b  | YLEATGRK                | 18 | 4357  | 0.84 | 0.18 | 21 |
| 1 F54H12.1a;F54H12.1b  | VADILTVK                | 10 | 538   | 0.84 | 0.25 | 30 |
| 22 F54H12.1a;F54H12.1b | YLEATGRK                | 17 | 5084  | 0.84 | 0.15 | 18 |
| 1 F54H12.1a;F54H12.1b  | SFARIHETNLK             | 22 | 22483 | 0.85 | 0.27 | 32 |
| 1 F54H12.1a;F54H12.1b  | EVFNFLATAGSK            | 49 | 516   | 0.85 | 0.39 | 46 |
| 7 F54H12.1a;F54H12.1b  | NQVTGEYGAVPATARK        | 30 | 4987  | 0.85 | 0.18 | 22 |
| 22 F54H12.1a;F54H12.1b | NQVTGEYGAVPATARK        | 53 | 3979  | 0.86 | 0.21 | 25 |
| 10 F54H12.1a;F54H12.1b | VADILTVK                | 53 | 1142  | 0.86 | 0.06 | 7  |
| 7 F54H12.1a;F54H12.1b  | YLEATGRK                | 10 | 1971  | 0.86 | 0.20 | 23 |
| 10 F54H12.1a;F54H12.1b | LQAPTGLDLPPK            | 27 | 1598  | 0.87 | 0.27 | 31 |
| 10 F54H12.1a;F54H12.1b | VADILTVK                | 70 | 2095  | 0.87 | 0.14 | 16 |
| 22 F54H12.1a;F54H12.1b | VADILTVK                | 12 | 551   | 0.87 | 0.07 | 8  |
| 22 F54H12.1a;F54H12.1b | GGAQDLARAK              | 22 | 6940  | 0.87 | 0.14 | 16 |
| 1 F54H12.1a;F54H12.1b  | VADILTVK                | 41 | 1928  | 0.87 | 0.10 | 12 |
| 10 F54H12.1a;F54H12.1b | LQAPTGLDLPPK            | 11 | 1494  | 0.87 | 0.08 | 10 |
| 1 F54H12.1a;F54H12.1b  | YLEATGRK                | 20 | 5004  | 0.87 | 0.16 | 18 |
| 22 F54H12.1a;F54H12.1b | GGAQDLARAK              | 17 | 5937  | 0.88 | 0.09 | 10 |
| 10 F54H12.1a;F54H12.1b | EVFNFLATAGSK            | 68 | 1008  | 0.88 | 0.13 | 15 |
| 1 F54H12.1a;F54H12.1b  | NQVTGEYGAVPATARK        | 35 | 4075  | 0.89 | 0.25 | 29 |
| 1 F54H12.1a;F54H12.1b  | VADILTVK                | 30 | 741   | 0.89 | 0.21 | 23 |
| 1 F54H12.1a;F54H12.1b  | GGAQDLARAK              | 22 | 4806  | 0.89 | 0.08 | 9  |
| 10 F54H12.1a;F54H12.1b | VADILTVK                | 77 | 2679  | 0.90 | 0.05 | 6  |
| 10 F54H12.1a;F54H12.1b | ILYGHLDQPK              | 62 | 35055 | 0.90 | 0.13 | 14 |
| 1 F54H12.1a;F54H12.1b  | RPLTlseK                | 14 | 3381  | 0.90 | 0.22 | 24 |
| 7 F54H12.1a;F54H12.1b  | GGAQDLARAK              | 25 | 2812  | 0.91 | 0.17 | 19 |
| 7 F54H12.1a;F54H12.1b  | GGAQDLARAK              | 23 | 2589  | 0.91 | 0.10 | 11 |
| 10 F54H12.1a;F54H12.1b | NQVTGEYGAVPATARK        | 62 | 8924  | 0.91 | 0.14 | 15 |
| 22 F54H12.1a;F54H12.1b | VADILTVK                | 44 | 1132  | 0.91 | 0.17 | 19 |
| 1 F54H12.1a;F54H12.1b  | TAVPSTHCDHIEAQK         | 15 | 5999  | 0.91 | 0.23 | 25 |
| 10 F54H12.1a;F54H12.1b | NQVTGEYGAVPATARK        | 77 | 7290  | 0.91 | 0.17 | 18 |
| 10 F54H12.1a;F54H12.1b | YLEATGRK                | 13 | 4136  | 0.92 | 0.09 | 10 |
| 1 F54H12.1a;F54H12.1b  | GGAQDLARAK              | 24 | 5432  | 0.92 | 0.07 | 8  |
| 1 F54H12.1a;F54H12.1b  | VADILTVK                | 30 | 515   | 0.93 | 0.23 | 24 |
| 1 F54H12.1a;F54H12.1b  | VADILTVK                | 42 | 1458  | 0.93 | 0.16 | 17 |
| 10 F54H12.1a;F54H12.1b | EVFNFLATAGSK            | 79 | 1339  | 0.93 | 0.14 | 15 |
| 1 F54H12.1a;F54H12.1b  | VADILTVK                | 18 | 722   | 0.93 | 0.20 | 21 |

|                        |                         |    |       |      |      |    |
|------------------------|-------------------------|----|-------|------|------|----|
| 7 F54H12.1a;F54H12.1b  | NQVTGEYGAVPATARK        | 39 | 4096  | 0.94 | 0.17 | 18 |
| 1 F54H12.1a;F54H12.1b  | NQVTGEYGAVPATARK        | 64 | 6679  | 0.94 | 0.21 | 23 |
| 1 F54H12.1a;F54H12.1b  | GGAQDLARAK              | 29 | 2273  | 0.94 | 0.10 | 11 |
| 1 F54H12.1a;F54H12.1b  | GGAQDLARAK              | 28 | 3799  | 0.94 | 0.12 | 13 |
| 22 F54H12.1a;F54H12.1b | EVFNFLATAGSK            | 57 | 1074  | 0.94 | 0.13 | 14 |
| 10 F54H12.1a;F54H12.1b | NQVTGEYGAVPATARK        | 49 | 7910  | 0.94 | 0.19 | 21 |
| 7 F54H12.1a;F54H12.1b  | LQAPTGLDLPPK            | 15 | 1238  | 0.94 | 0.23 | 25 |
| 10 F54H12.1a;F54H12.1b | SFARIHETNLK             | 14 | 18296 | 0.94 | 0.13 | 13 |
| 22 F54H12.1a;F54H12.1b | YLEATGRK                | 13 | 9788  | 0.95 | 0.06 | 7  |
| 22 F54H12.1a;F54H12.1b | YLEATGRK                | 11 | 9776  | 0.95 | 0.05 | 6  |
| 22 F54H12.1a;F54H12.1b | YLEATGRK                | 16 | 5149  | 0.95 | 0.13 | 14 |
| 1 F54H12.1a;F54H12.1b  | LQAPTGLDLPPK            | 16 | 1295  | 0.95 | 0.14 | 15 |
| 10 F54H12.1a;F54H12.1b | GGAQDLARAK              | 24 | 4640  | 0.95 | 0.10 | 10 |
| 22 F54H12.1a;F54H12.1b | ILYGHLDQPK              | 32 | 3792  | 0.95 | 0.16 | 16 |
| 1 F54H12.1a;F54H12.1b  | NQVTGEYGAVPATARK        | 36 | 5824  | 0.96 | 0.29 | 30 |
| 22 F54H12.1a;F54H12.1b | EVFNFLATAGSK            | 79 | 997   | 0.96 | 0.10 | 11 |
| 22 F54H12.1a;F54H12.1b | EVFNFLATAGSK            | 78 | 3260  | 0.96 | 0.09 | 9  |
| 1 F54H12.1a;F54H12.1b  | TAVPSTIHCDHLIEAQK       | 13 | 5659  | 0.96 | 0.36 | 38 |
| 10 F54H12.1a;F54H12.1b | EVFNFLATAGSK            | 61 | 1212  | 0.96 | 0.15 | 16 |
| 10 F54H12.1a;F54H12.1b | GGAQDLARAK              | 33 | 4325  | 0.97 | 0.14 | 15 |
| 7 F54H12.1a;F54H12.1b  | NQVTGEYGAVPATARK        | 58 | 6800  | 0.97 | 0.12 | 13 |
| 1 F54H12.1a;F54H12.1b  | LQAPTGLDLPPK            | 23 | 1062  | 0.97 | 0.24 | 25 |
| 1 F54H12.1a;F54H12.1b  | RPLTLSEK                | 34 | 4753  | 0.97 | 0.05 | 6  |
| 22 F54H12.1a;F54H12.1b | TIFTITPGSEQVRATIERDGLSK | 16 | 6782  | 0.98 | 0.18 | 19 |
| 22 F54H12.1a;F54H12.1b | ILYGHLDQPK              | 34 | 2729  | 0.98 | 0.10 | 11 |
| 10 F54H12.1a;F54H12.1b | QGMLPLTFANPADYDK        | 60 | 3304  | 0.98 | 0.10 | 10 |
| 7 F54H12.1a;F54H12.1b  | NQVTGEYGAVPATARK        | 17 | 10261 | 1.00 | 0.09 | 9  |
| 10 F54H12.1a;F54H12.1b | YLEATGRK                | 18 | 3240  | 1.00 | 0.09 | 9  |
| 10 F54H12.1a;F54H12.1b | GGAQDLARAK              | 29 | 6605  | 1.01 | 0.11 | 11 |
| 1 F54H12.1a;F54H12.1b  | VADILTVK                | 37 | 1822  | 1.01 | 0.14 | 14 |
| 7 F54H12.1a;F54H12.1b  | EVFNFLATAGSK            | 68 | 867   | 1.01 | 0.19 | 19 |
| 10 F54H12.1a;F54H12.1b | GGAQDLARAK              | 23 | 9057  | 1.02 | 0.19 | 19 |
| 1 F54H12.1a;F54H12.1b  | NQVTGEYGAVPATARK        | 62 | 7235  | 1.02 | 0.20 | 20 |
| 22 F54H12.1a;F54H12.1b | TAVPSTIHCDHLIEAQK       | 10 | 10112 | 1.02 | 0.27 | 27 |
| 1 F54H12.1a;F54H12.1b  | YLEATGRK                | 27 | 3965  | 1.02 | 0.11 | 11 |
| 10 F54H12.1a;F54H12.1b | NQVTGEYGAVPATARK        | 45 | 7158  | 1.03 | 0.09 | 9  |
| 1 F54H12.1a;F54H12.1b  | YLEATGRK                | 25 | 3447  | 1.03 | 0.09 | 8  |
| 7 F54H12.1a;F54H12.1b  | LQAPTGLDLPPK            | 20 | 1051  | 1.03 | 0.22 | 21 |
| 22 F54H12.1a;F54H12.1b | NQVTGEYGAVPATARK        | 27 | 8258  | 1.04 | 0.19 | 19 |
| 1 F54H12.1a;F54H12.1b  | ILYGHLDQPK              | 23 | 2778  | 1.04 | 0.10 | 10 |
| 22 F54H12.1a;F54H12.1b | GGAQDLARAK              | 38 | 5868  | 1.05 | 0.20 | 19 |
| 7 F54H12.1a;F54H12.1b  | VADILTVK                | 14 | 506   | 1.05 | 0.12 | 11 |
| 7 F54H12.1a;F54H12.1b  | NQVTGEYGAVPATARK        | 79 | 6502  | 1.05 | 0.17 | 16 |
| 22 F54H12.1a;F54H12.1b | ILYGHLDQPK              | 35 | 12153 | 1.06 | 0.09 | 8  |
| 1 F54H12.1a;F54H12.1b  | NQVTGEYGAVPATARK        | 45 | 5081  | 1.06 | 0.33 | 31 |
| 22 F54H12.1a;F54H12.1b | EVFNFLATAGSK            | 76 | 2594  | 1.07 | 0.13 | 12 |
| 10 F54H12.1a;F54H12.1b | ILYGHLDQPK              | 64 | 44422 | 1.07 | 0.10 | 9  |
| 22 F54H12.1a;F54H12.1b | VADILTVK                | 56 | 1228  | 1.08 | 0.18 | 17 |
| 22 F54H12.1a;F54H12.1b | EVFNFLATAGSK            | 52 | 679   | 1.08 | 0.12 | 12 |
| 7 F54H12.1a;F54H12.1b  | VADILTVK                | 44 | 1594  | 1.09 | 0.13 | 12 |
| 1 F54H12.1a;F54H12.1b  | EVFNFLATAGSK            | 87 | 871   | 1.09 | 0.17 | 16 |
| 1 F54H12.1a;F54H12.1b  | TAVPSTIHCDHLIEAQK       | 12 | 18652 | 1.09 | 0.25 | 23 |
| 7 F54H12.1a;F54H12.1b  | EVFNFLATAGSK            | 85 | 1317  | 1.09 | 0.22 | 20 |
| 22 F54H12.1a;F54H12.1b | SFARIHETNLK             | 13 | 17491 | 1.09 | 0.10 | 9  |
| 1 F54H12.1a;F54H12.1b  | NQVTGEYGAVPATARK        | 49 | 2977  | 1.09 | 0.22 | 20 |
| 1 F54H12.1a;F54H12.1b  | YLEATGRK                | 16 | 2236  | 1.10 | 0.14 | 13 |
| 10 F54H12.1a;F54H12.1b | GGAQDLARAK              | 27 | 7516  | 1.10 | 0.15 | 14 |
| 7 F54H12.1a;F54H12.1b  | GGAQDLARAK              | 25 | 3378  | 1.11 | 0.12 | 11 |
| 22 F54H12.1a;F54H12.1b | CTTDHISAAGPWLK          | 10 | 2676  | 1.12 | 0.11 | 10 |
| 22 F54H12.1a;F54H12.1b | EVFNFLATAGSK            | 42 | 1527  | 1.12 | 0.13 | 11 |
| 22 F54H12.1a;F54H12.1b | GGAQDLARAK              | 16 | 6047  | 1.12 | 0.12 | 11 |
| 1 F54H12.1a;F54H12.1b  | YLEATGRK                | 28 | 3248  | 1.12 | 0.13 | 12 |
| 7 F54H12.1a;F54H12.1b  | SFARIHETNLK             | 10 | 11542 | 1.13 | 0.19 | 17 |
| 1 F54H12.1a;F54H12.1b  | EVFNFLATAGSK            | 72 | 947   | 1.13 | 0.14 | 12 |
| 22 F54H12.1a;F54H12.1b | GGAQDLARAK              | 30 | 3457  | 1.13 | 0.04 | 4  |
| 22 F54H12.1a;F54H12.1b | EVFNFLATAGSK            | 38 | 668   | 1.14 | 0.20 | 18 |
| 22 F54H12.1a;F54H12.1b | VADILTVK                | 26 | 696   | 1.14 | 0.12 | 11 |
| 22 F54H12.1a;F54H12.1b | GGAQDLARAK              | 32 | 6575  | 1.14 | 0.18 | 16 |
| 7 F54H12.1a;F54H12.1b  | VADILTVK                | 18 | 889   | 1.14 | 0.13 | 11 |
| 22 F54H12.1a;F54H12.1b | EVFNFLATAGSK            | 46 | 657   | 1.15 | 0.12 | 10 |
| 1 F54H12.1a;F54H12.1b  | VADILTVK                | 19 | 568   | 1.16 | 0.23 | 20 |
| 7 F54H12.1a;F54H12.1b  | NQVTGEYGAVPATARK        | 52 | 4053  | 1.16 | 0.19 | 17 |
| 22 F54H12.1a;F54H12.1b | GGAQDLARAK              | 13 | 7992  | 1.16 | 0.14 | 12 |
| 22 F54H12.1a;F54H12.1b | NQVTGEYGAVPATARK        | 38 | 2321  | 1.17 | 0.20 | 18 |
| 7 F54H12.1a;F54H12.1b  | NQVTGEYGAVPATARK        | 23 | 812   | 1.17 | 0.12 | 10 |
| 1 F54H12.1a;F54H12.1b  | VADILTVK                | 45 | 1006  | 1.17 | 0.12 | 10 |
| 10 F54H12.1a;F54H12.1b | ILYGHLDQPK              | 31 | 2945  | 1.17 | 0.25 | 22 |
| 1 F54H12.1a;F54H12.1b  | ILYGHLDQPK              | 32 | 4172  | 1.19 | 0.17 | 15 |
| 22 F54H12.1a;F54H12.1b | GGAQDLARAK              | 26 | 6013  | 1.19 | 0.18 | 15 |
| 1 F54H12.1a;F54H12.1b  | LQAPTGLDLPPK            | 25 | 2021  | 1.19 | 0.22 | 19 |
| 22 F54H12.1a;F54H12.1b | VADILTVK                | 44 | 1132  | 1.19 | 0.10 | 8  |
| 7 F54H12.1a;F54H12.1b  | YLEATGRK                | 29 | 8238  | 1.19 | 0.11 | 10 |
| 1 F54H12.1a;F54H12.1b  | ILYGHLDQPK              | 37 | 5499  | 1.19 | 0.14 | 11 |
| 22 F54H12.1a;F54H12.1b | EVFNFLATAGSK            | 32 | 1363  | 1.19 | 0.12 | 10 |
| 1 F54H12.1a;F54H12.1b  | EVFNFLATAGSK            | 64 | 492   | 1.20 | 0.12 | 10 |
| 7 F54H12.1a;F54H12.1b  | VADILTVK                | 38 | 1001  | 1.20 | 0.09 | 8  |
| 10 F54H12.1a;F54H12.1b | NQVTGEYGAVPATARK        | 12 | 3650  | 1.20 | 0.17 | 14 |
| 1 F54H12.1a;F54H12.1b  | EVFNFLATAGSK            | 60 | 569   | 1.21 | 0.22 | 18 |
| 10 F54H12.1a;F54H12.1b | GGAQDLARAK              | 16 | 6159  | 1.21 | 0.10 | 8  |
| 22 F54H12.1a;F54H12.1b | LNGWTS AK               | 20 | 381   | 1.22 | 0.21 | 17 |
| 22 F54H12.1a;F54H12.1b | YLEATGRK                | 12 | 6087  | 1.22 | 0.09 | 7  |
| 7 F54H12.1a;F54H12.1b  | NQVTGEYGAVPATARK        | 58 | 5987  | 1.22 | 0.18 | 15 |
| 22 F54H12.1a;F54H12.1b | NQVTGEYGAVPATARK        | 12 | 18050 | 1.22 | 0.23 | 19 |
| 10 F54H12.1a;F54H12.1b | SFARIHETNLK             | 14 | 77875 | 1.23 | 0.16 | 13 |
| 22 F54H12.1a;F54H12.1b | GGAQDLARAK              | 23 | 3089  | 1.23 | 0.17 | 13 |
| 1 F54H12.1a;F54H12.1b  | LQAPTGLDLPPK            | 39 | 1609  | 1.23 | 0.10 | 8  |
| 22 F54H12.1a;F54H12.1b | NQVTGEYGAVPATARK        | 15 | 11984 | 1.24 | 0.16 | 13 |
| 1 F54H12.1a;F54H12.1b  | TAVPSTIHCDHLIEAQK       | 18 | 5815  | 1.24 | 0.46 | 37 |
| 10 F54H12.1a;F54H12.1b | YLEATGRK                | 17 | 9418  | 1.25 | 0.10 | 8  |
| 22 F54H12.1a;F54H12.1b | GGAQDLARAK              | 17 | 2962  | 1.25 | 0.16 | 13 |
| 22 F54H12.1a;F54H12.1b | TIFTITPGSEQVRATIERDGLSK | 11 | 6591  | 1.26 | 0.08 | 7  |

|                        |                   |    |        |      |      |    |
|------------------------|-------------------|----|--------|------|------|----|
| 1 F54H12.1a;F54H12.1b  | ILYGHLDQPK        | 50 | 16126  | 1.26 | 0.11 | 9  |
| 7 F54H12.1a;F54H12.1b  | GGAQDLARAK        | 22 | 1781   | 1.27 | 0.12 | 9  |
| 22 F54H12.1a;F54H12.1b | YLEATGRK          | 12 | 1182   | 1.27 | 0.26 | 20 |
| 10 F54H12.1a;F54H12.1b | VADILTVK          | 35 | 965    | 1.28 | 0.12 | 9  |
| 1 F54H12.1a;F54H12.1b  | SFARIHETNLK       | 11 | 24987  | 1.28 | 0.22 | 18 |
| 1 F54H12.1a;F54H12.1b  | NQVTGEYGAVPATARK  | 52 | 7263   | 1.28 | 0.24 | 19 |
| 7 F54H12.1a;F54H12.1b  | NQVTGEYGAVPATARK  | 76 | 6163   | 1.28 | 0.18 | 14 |
| 1 F54H12.1a;F54H12.1b  | LQAPTGLDLPPK      | 13 | 794    | 1.28 | 0.18 | 14 |
| 7 F54H12.1a;F54H12.1b  | GGAQDLARAK        | 18 | 2012   | 1.29 | 0.08 | 6  |
| 10 F54H12.1a;F54H12.1b | ILYGHLDQPK        | 14 | 2704   | 1.30 | 0.12 | 9  |
| 7 F54H12.1a;F54H12.1b  | VADILTVK          | 46 | 1813   | 1.30 | 0.25 | 20 |
| 10 F54H12.1a;F54H12.1b | SFARIHETNLK       | 34 | 6409   | 1.30 | 0.15 | 11 |
| 22 F54H12.1a;F54H12.1b | RPLTLSEK          | 13 | 11483  | 1.30 | 0.09 | 7  |
| 7 F54H12.1a;F54H12.1b  | YLEATGRK          | 13 | 1527   | 1.30 | 0.16 | 12 |
| 1 F54H12.1a;F54H12.1b  | ILYGHLDQPK        | 33 | 13381  | 1.30 | 0.07 | 5  |
| 7 F54H12.1a;F54H12.1b  | LQAPTGLDLPPK      | 20 | 1151   | 1.31 | 0.18 | 14 |
| 7 F54H12.1a;F54H12.1b  | YLEATGRK          | 27 | 5503   | 1.31 | 0.13 | 10 |
| 22 F54H12.1a;F54H12.1b | GGAQDLARAK        | 27 | 5850   | 1.31 | 0.21 | 16 |
| 7 F54H12.1a;F54H12.1b  | VADILTVK          | 37 | 1114   | 1.32 | 0.09 | 7  |
| 22 F54H12.1a;F54H12.1b | GGAQDLARAK        | 48 | 12927  | 1.33 | 0.11 | 8  |
| 22 F54H12.1a;F54H12.1b | VADILTVK          | 14 | 600    | 1.33 | 0.13 | 10 |
| 1 F54H12.1a;F54H12.1b  | VADILTVK          | 40 | 641    | 1.34 | 0.08 | 6  |
| 22 F54H12.1a;F54H12.1b | RPLTLSEK          | 11 | 10683  | 1.35 | 0.14 | 10 |
| 10 F54H12.1a;F54H12.1b | SFARIHETNLK       | 16 | 108035 | 1.35 | 0.08 | 6  |
| 22 F54H12.1a;F54H12.1b | GGAQDLARAK        | 26 | 8685   | 1.36 | 0.05 | 4  |
| 10 F54H12.1a;F54H12.1b | CTTDHISAAGPWLK    | 64 | 3770   | 1.37 | 0.15 | 11 |
| 7 F54H12.1a;F54H12.1b  | GGAQDLARAK        | 18 | 3129   | 1.37 | 0.13 | 10 |
| 1 F54H12.1a;F54H12.1b  | ILYGHLDQPK        | 52 | 3713   | 1.38 | 0.10 | 7  |
| 7 F54H12.1a;F54H12.1b  | NQVTGEYGAVPATARK  | 11 | 10558  | 1.38 | 0.21 | 15 |
| 22 F54H12.1a;F54H12.1b | VADILTVK          | 30 | 1129   | 1.38 | 0.08 | 5  |
| 1 F54H12.1a;F54H12.1b  | YLEATGRK          | 15 | 2708   | 1.39 | 0.05 | 4  |
| 7 F54H12.1a;F54H12.1b  | GGAQDLARAK        | 31 | 1447   | 1.39 | 0.15 | 11 |
| 10 F54H12.1a;F54H12.1b | NQVTGEYGAVPATARK  | 69 | 11995  | 1.39 | 0.12 | 9  |
| 10 F54H12.1a;F54H12.1b | SYLPYEK           | 12 | 1920   | 1.39 | 0.09 | 6  |
| 10 F54H12.1a;F54H12.1b | RPLTLSEK          | 24 | 10220  | 1.40 | 0.07 | 5  |
| 10 F54H12.1a;F54H12.1b | VADILTVK          | 60 | 1871   | 1.41 | 0.22 | 15 |
| 22 F54H12.1a;F54H12.1b | ILYGHLDQPK        | 39 | 3932   | 1.42 | 0.13 | 9  |
| 7 F54H12.1a;F54H12.1b  | RPLTLSEK          | 15 | 2674   | 1.42 | 0.03 | 2  |
| 7 F54H12.1a;F54H12.1b  | GGAQDLARAK        | 23 | 1125   | 1.42 | 0.11 | 8  |
| 7 F54H12.1a;F54H12.1b  | NQVTGEYGAVPATARK  | 42 | 6377   | 1.43 | 0.18 | 13 |
| 7 F54H12.1a;F54H12.1b  | YLEATGRK          | 14 | 4404   | 1.43 | 0.14 | 10 |
| 22 F54H12.1a;F54H12.1b | VADILTVK          | 31 | 1558   | 1.43 | 0.12 | 8  |
| 1 F54H12.1a;F54H12.1b  | ILYGHLDQPK        | 25 | 2041   | 1.45 | 0.10 | 7  |
| 7 F54H12.1a;F54H12.1b  | VADILTVK          | 22 | 833    | 1.45 | 0.15 | 10 |
| 22 F54H12.1a;F54H12.1b | SFARIHETNLK       | 14 | 29567  | 1.45 | 0.06 | 4  |
| 1 F54H12.1a;F54H12.1b  | SFARIHETNLK       | 24 | 1587   | 1.45 | 0.30 | 21 |
| 7 F54H12.1a;F54H12.1b  | NQVTGEYGAVPATARK  | 47 | 4026   | 1.46 | 0.11 | 8  |
| 7 F54H12.1a;F54H12.1b  | NQVTGEYGAVPATARK  | 70 | 4818   | 1.46 | 0.19 | 13 |
| 7 F54H12.1a;F54H12.1b  | GGAQDLARAK        | 23 | 1872   | 1.48 | 0.08 | 6  |
| 7 F54H12.1a;F54H12.1b  | LQAPTGLDLPPK      | 40 | 1776   | 1.49 | 0.25 | 17 |
| 22 F54H12.1a;F54H12.1b | SYLPYEK           | 27 | 2017   | 1.50 | 0.15 | 10 |
| 22 F54H12.1a;F54H12.1b | VADILTVK          | 39 | 1718   | 1.51 | 0.08 | 5  |
| 1 F54H12.1a;F54H12.1b  | ILYGHLDQPK        | 63 | 4028   | 1.51 | 0.17 | 11 |
| 10 F54H12.1a;F54H12.1b | SFARIHETNLK       | 56 | 6913   | 1.52 | 0.10 | 7  |
| 22 F54H12.1a;F54H12.1b | SYLPYEK           | 10 | 1170   | 1.52 | 0.20 | 13 |
| 22 F54H12.1a;F54H12.1b | TAVPSTIHCDHLIEAQK | 12 | 22394  | 1.55 | 0.12 | 8  |
| 10 F54H12.1a;F54H12.1b | YLEATGRK          | 16 | 10854  | 1.55 | 0.10 | 7  |
| 7 F54H12.1a;F54H12.1b  | GGAQDLARAK        | 14 | 1943   | 1.55 | 0.11 | 7  |
| 1 F54H12.1a;F54H12.1b  | NQVTGEYGAVPATARK  | 64 | 6665   | 1.55 | 0.14 | 9  |
| 22 F54H12.1a;F54H12.1b | VADILTVK          | 69 | 1753   | 1.56 | 0.13 | 8  |
| 10 F54H12.1a;F54H12.1b | RPLTLSEK          | 18 | 11134  | 1.60 | 0.08 | 5  |
| 10 F54H12.1a;F54H12.1b | ILYGHLDQPK        | 47 | 13905  | 1.61 | 0.14 | 8  |
| 1 F54H12.1a;F54H12.1b  | SFARIHETNLK       | 16 | 11195  | 1.61 | 0.12 | 8  |
| 1 F54H12.1a;F54H12.1b  | SFARIHETNLK       | 12 | 1014   | 1.62 | 0.09 | 6  |
| 1 F54H12.1a;F54H12.1b  | LQAPTGLDLPPK      | 41 | 1484   | 1.62 | 0.12 | 7  |
| 7 F54H12.1a;F54H12.1b  | EVFNFLATAGSK      | 54 | 627    | 1.63 | 0.18 | 11 |
| 10 F54H12.1a;F54H12.1b | NQVTGEYGAVPATARK  | 61 | 9704   | 1.64 | 0.10 | 6  |
| 22 F54H12.1a;F54H12.1b | NQVTGEYGAVPATARK  | 48 | 7831   | 1.65 | 0.20 | 12 |
| 22 F54H12.1a;F54H12.1b | ILYGHLDQPK        | 28 | 5603   | 1.66 | 0.12 | 7  |
| 1 F54H12.1a;F54H12.1b  | ILYGHLDQPK        | 67 | 4874   | 1.66 | 0.12 | 7  |
| 22 F54H12.1a;F54H12.1b | NQVTGEYGAVPATARK  | 42 | 6351   | 1.66 | 0.08 | 5  |
| 10 F54H12.1a;F54H12.1b | VADILTVK          | 23 | 1322   | 1.66 | 0.22 | 13 |
| 22 F54H12.1a;F54H12.1b | SFARIHETNLK       | 11 | 28507  | 1.66 | 0.17 | 10 |
| 1 F54H12.1a;F54H12.1b  | RPLTLSEK          | 16 | 2596   | 1.66 | 0.18 | 11 |
| 10 F54H12.1a;F54H12.1b | ILYGHLDQPK        | 40 | 9046   | 1.68 | 0.13 | 8  |
| 10 F54H12.1a;F54H12.1b | VADILTVK          | 22 | 988    | 1.70 | 0.12 | 7  |
| 22 F54H12.1a;F54H12.1b | SFARIHETNLK       | 12 | 79113  | 1.71 | 0.16 | 9  |
| 22 F54H12.1a;F54H12.1b | YLEATGRK          | 10 | 4456   | 1.71 | 0.05 | 3  |
| 10 F54H12.1a;F54H12.1b | SFARIHETNLK       | 10 | 17407  | 1.71 | 0.23 | 13 |
| 22 F54H12.1a;F54H12.1b | VADILTVK          | 24 | 1156   | 1.72 | 0.19 | 11 |
| 7 F54H12.1a;F54H12.1b  | SFARIHETNLK       | 13 | 13278  | 1.72 | 0.20 | 12 |
| 1 F54H12.1a;F54H12.1b  | GGAQDLARAK        | 27 | 2003   | 1.72 | 0.20 | 12 |
| 7 F54H12.1a;F54H12.1b  | YLEATGRK          | 15 | 5144   | 1.73 | 0.05 | 3  |
| 1 F54H12.1a;F54H12.1b  | GGAQDLARAK        | 33 | 2636   | 1.73 | 0.10 | 6  |
| 1 F54H12.1a;F54H12.1b  | SFARIHETNLK       | 16 | 26570  | 1.75 | 0.19 | 11 |
| 22 F54H12.1a;F54H12.1b | NQVTGEYGAVPATARK  | 11 | 23471  | 1.75 | 0.10 | 6  |
| 22 F54H12.1a;F54H12.1b | NQVTGEYGAVPATARK  | 62 | 17144  | 1.75 | 0.26 | 15 |
| 22 F54H12.1a;F54H12.1b | YLEATGRK          | 27 | 7519   | 1.76 | 0.07 | 4  |
| 1 F54H12.1a;F54H12.1b  | RPLTLSEK          | 12 | 4821   | 1.77 | 0.11 | 6  |
| 7 F54H12.1a;F54H12.1b  | YLEATGRK          | 12 | 6782   | 1.77 | 0.15 | 9  |
| 22 F54H12.1a;F54H12.1b | SFARIHETNLK       | 41 | 5632   | 1.79 | 0.12 | 7  |
| 10 F54H12.1a;F54H12.1b | TAVPSTIHCDHLIEAQK | 15 | 13018  | 1.79 | 0.27 | 15 |
| 22 F54H12.1a;F54H12.1b | SFARIHETNLK       | 41 | 5953   | 1.79 | 0.08 | 4  |
| 10 F54H12.1a;F54H12.1b | TAVPSTIHCDHLIEAQK | 16 | 11553  | 1.80 | 0.04 | 2  |
| 7 F54H12.1a;F54H12.1b  | NQVTGEYGAVPATARK  | 49 | 3883   | 1.81 | 0.16 | 9  |
| 10 F54H12.1a;F54H12.1b | NQVTGEYGAVPATARK  | 13 | 21698  | 1.83 | 0.18 | 10 |
| 1 F54H12.1a;F54H12.1b  | RPLTLSEK          | 22 | 3841   | 1.89 | 0.18 | 10 |
| 22 F54H12.1a;F54H12.1b | SFARIHETNLK       | 13 | 98244  | 1.89 | 0.16 | 9  |
| 1 F54H12.1a;F54H12.1b  | SFARIHETNLK       | 17 | 7945   | 1.93 | 0.19 | 10 |
| 1 F54H12.1a;F54H12.1b  | ILYGHLDQPK        | 22 | 1600   | 1.94 | 0.08 | 4  |
| 22 F54H12.1a;F54H12.1b | ILYGHLDQPK        | 29 | 11174  | 1.95 | 0.08 | 4  |

|                        |                            |    |       |      |      |     |
|------------------------|----------------------------|----|-------|------|------|-----|
| 1 F54H12.1a;F54H12.1b  | ILYGHLDQPK                 | 18 | 2017  | 1.95 | 0.19 | 10  |
| 7 F54H12.1a;F54H12.1b  | NQVTGEYGAVPATARK           | 47 | 5123  | 1.96 | 0.12 | 6   |
| 1 F54H12.1a;F54H12.1b  | ILYGHLDQPK                 | 26 | 2863  | 1.97 | 0.15 | 7   |
| 10 F54H12.1a;F54H12.1b | CTTDHISAAGPWLK             | 58 | 3096  | 1.98 | 0.09 | 4   |
| 10 F54H12.1a;F54H12.1b | VADILTVK                   | 27 | 936   | 2.01 | 0.06 | 3   |
| 22 F54H12.1a;F54H12.1b | NQVTGEYGAVPATARK           | 47 | 13686 | 2.02 | 0.17 | 8   |
| 22 F54H12.1a;F54H12.1b | YRGHLDNISNNLFLTAINADNGEMNK | 10 | 2002  | 2.05 | 0.07 | 3   |
| 22 F54H12.1a;F54H12.1b | VADILTVK                   | 58 | 1251  | 2.07 | 0.12 | 6   |
| 10 F54H12.1a;F54H12.1b | EVFNFLATAGSK               | 13 | 288   | 2.08 | 0.22 | 11  |
| 1 F54H12.1a;F54H12.1b  | RPLTLSEK                   | 14 | 7148  | 2.11 | 0.12 | 5   |
| 7 F54H12.1a;F54H12.1b  | VADILTVK                   | 46 | 1700  | 2.14 | 0.07 | 3   |
| 7 F54H12.1a;F54H12.1b  | RPLTLSEK                   | 18 | 1896  | 2.14 | 0.18 | 8   |
| 7 F54H12.1a;F54H12.1b  | NQVTGEYGAVPATARK           | 23 | 7260  | 2.19 | 0.30 | 14  |
| 10 F54H12.1a;F54H12.1b | VADILTVK                   | 59 | 2093  | 2.21 | 0.14 | 6   |
| 10 F54H12.1a;F54H12.1b | VADILTVK                   | 62 | 1490  | 2.23 | 0.12 | 5   |
| 10 F54H12.1a;F54H12.1b | VADILTVK                   | 60 | 2058  | 2.28 | 0.21 | 9   |
| 7 F54H12.1a;F54H12.1b  | LQAPTGLDLPPK               | 41 | 1172  | 2.30 | 0.53 | 23  |
| 7 F54H12.1a;F54H12.1b  | AGSALNRMK                  | 12 | 1322  | 2.31 | 0.24 | 10  |
| 7 F54H12.1a;F54H12.1b  | LQAPTGLDLPPK               | 36 | 1520  | 2.35 | 0.49 | 21  |
| 7 F54H12.1a;F54H12.1b  | VADILTVK                   | 40 | 1384  | 2.36 | 0.07 | 3   |
| 7 F54H12.1a;F54H12.1b  | RPLTLSEK                   | 14 | 1575  | 2.39 | 0.14 | 6   |
| 7 F54H12.1a;F54H12.1b  | VADILTVK                   | 37 | 1239  | 2.39 | 0.05 | 2   |
| 10 F54H12.1a;F54H12.1b | ILYGHLDQPK                 | 43 | 9741  | 2.44 | 0.14 | 6   |
| 10 F54H12.1a;F54H12.1b | NQVTGEYGAVPATARK           | 58 | 14053 | 2.51 | 0.22 | 9   |
| 7 F54H12.1a;F54H12.1b  | VADILTVK                   | 43 | 1746  | 2.53 | 0.12 | 5   |
| 10 F54H12.1a;F54H12.1b | CTTDHISAAGPWLK             | 27 | 8694  | 2.59 | 0.15 | 6   |
| 10 F54H12.1a;F54H12.1b | NQVTGEYGAVPATARK           | 64 | 10511 | 2.66 | 0.25 | 9   |
| 7 F54H12.1a;F54H12.1b  | RPLTLSEK                   | 15 | 3498  | 2.71 | 0.23 | 9   |
| 10 F54H12.1a;F54H12.1b | RPLTLSEK                   | 16 | 7060  | 2.72 | 0.16 | 6   |
| 22 F54H12.1a;F54H12.1b | ILYGHLDQPK                 | 26 | 3523  | 2.75 | 0.11 | 4   |
| 10 F54H12.1a;F54H12.1b | ILYGHLDQPK                 | 23 | 5059  | 2.85 | 0.07 | 2   |
| 1 F54H12.1a;F54H12.1b  | RPLTLSEK                   | 19 | 2740  | 2.87 | 0.27 | 9   |
| 22 F54H12.1a;F54H12.1b | RPLTLSEK                   | 16 | 11777 | 2.89 | 0.11 | 4   |
| 10 F54H12.1a;F54H12.1b | SFARIHETNLK                | 20 | 65684 | 3.01 | 0.34 | 11  |
| 10 F54H12.1a;F54H12.1b | SFARIHETNLK                | 13 | 54716 | 3.08 | 0.25 | 8   |
| 10 F54H12.1a;F54H12.1b | RPLTLSEK                   | 20 | 9240  | 3.11 | 0.13 | 4   |
| 22 F54H12.1a;F54H12.1b | CTTDHISAAGPWLK             | 15 | 6705  | 3.13 | 0.19 | 6   |
| 7 F54H12.1a;F54H12.1b  | TAVPSTIHCDHLIEAQK          | 19 | 6544  | 3.13 | 0.25 | 8   |
| 7 F54H12.1a;F54H12.1b  | RPLTLSEK                   | 14 | 2708  | 3.36 | 0.12 | 4   |
| 7 F54H12.1a;F54H12.1b  | RPLTLSEK                   | 14 | 2712  | 3.47 | 0.11 | 3   |
| 7 F54H12.1a;F54H12.1b  | RPLTLSEK                   | 13 | 2017  | 3.88 | 0.19 | 5   |
| 7 F54H12.1a;F54H12.1b  | RPLTLSEK                   | 20 | 2730  | 3.91 | 0.06 | 1   |
| 1 F54H12.1a;F54H12.1b  | CTTDHISAAGPWLK             | 14 | 3467  | 4.34 | 0.47 | 11  |
| 22 F54H12.1a;F54H12.1b | CTTDHISAAGPWLK             | 23 | 18872 | 5.40 | 0.40 | 7   |
| 7 F54H12.6             | IVEERLAAYAEK               | 36 | 6916  | 0.38 | 0.29 | 77  |
| 7 F54H12.6             | IVEERLAAYAEK               | 32 | 5970  | 0.44 | 0.39 | 89  |
| 22 F54H12.6            | IVEERLAAYAEK               | 37 | 11124 | 0.50 | 0.18 | 37  |
| 10 F54H12.6            | IVEERLAAYAEK               | 21 | 2457  | 0.54 | 0.16 | 30  |
| 22 F54H12.6            | IVEERLAAYAEK               | 48 | 13353 | 0.55 | 0.20 | 36  |
| 10 F54H12.6            | IVEERLAAYAEK               | 31 | 3398  | 0.57 | 0.29 | 51  |
| 10 F54H12.6            | IVEERLAAYAEK               | 34 | 25945 | 0.58 | 0.16 | 28  |
| 10 F54H12.6            | IVEERLAAYAEK               | 24 | 3438  | 0.61 | 0.20 | 33  |
| 10 F54H12.6            | IVEERLAAYAEK               | 33 | 3699  | 0.61 | 0.11 | 17  |
| 10 F54H12.6            | IVEERLAAYAEK               | 61 | 34223 | 0.65 | 0.05 | 8   |
| 10 F54H12.6            | IVEERLAAYAEK               | 37 | 7014  | 0.81 | 0.16 | 20  |
| 1 F54H12.6             | IVEERLAAYAEK               | 12 | 1093  | 0.86 | 0.26 | 30  |
| 1 F54H12.6             | IVEERLAAYAEK               | 40 | 9402  | 0.93 | 0.09 | 10  |
| 22 F54H12.6            | IVEERLAAYAEK               | 28 | 5643  | 1.03 | 0.12 | 12  |
| 1 F54H12.6             | IVEERLAAYAEK               | 13 | 672   | 1.04 | 0.06 | 6   |
| 22 F54H12.6            | IVEERLAAYAEK               | 25 | 8007  | 1.14 | 0.15 | 13  |
| 10 F54H12.6            | IVEERLAAYAEK               | 41 | 11994 | 1.21 | 0.15 | 13  |
| 1 F54H12.6             | IVEERLAAYAEK               | 28 | 6038  | 1.22 | 0.15 | 13  |
| 10 F54H12.6            | IVEERLAAYAEK               | 32 | 20101 | 1.36 | 0.18 | 13  |
| 10 F54H12.6            | IVEERLAAYAEK               | 17 | 14824 | 1.45 | 0.13 | 9   |
| 7 F54H12.6             | IVEERLAAYAEK               | 29 | 5039  | 1.72 | 0.28 | 16  |
| 7 F54H12.6             | IVEERLAAYAEK               | 19 | 2887  | 1.88 | 0.17 | 9   |
| 22 F54H12.6            | IVEERLAAYAEK               | 35 | 5806  | 1.99 | 0.09 | 5   |
| 22 F54H12.6            | IVEERLAAYAEK               | 40 | 8802  | 2.11 | 0.13 | 6   |
| 22 F55B11.1            | AVTTVEGIGSVAK              | 48 | 1374  | 0.21 | 0.23 | 112 |
| 22 F55B11.1            | ESTGAILAVPASLAAK           | 25 | 1663  | 0.23 | 0.28 | 121 |
| 22 F55B11.1            | ALGLLSDELK                 | 15 | 599   | 0.29 | 0.28 | 96  |
| 22 F55B11.1            | ESTGAILAVPASLAAK           | 24 | 2036  | 0.30 | 0.22 | 72  |
| 10 F55B11.1            | AVIVPLLEENEHFAAYK          | 25 | 841   | 0.31 | 0.39 | 127 |
| 22 F55B11.1            | LALTTMEK                   | 20 | 602   | 0.34 | 0.33 | 98  |
| 10 F55B11.1            | LALTTMEK                   | 32 | 628   | 0.34 | 0.15 | 45  |
| 10 F55B11.1            | AVIVPLLEENEHFAAYK          | 25 | 1041  | 0.35 | 0.15 | 43  |
| 22 F55B11.1            | HFVIHSSLNDNEQVIK           | 25 | 2783  | 0.35 | 0.21 | 61  |
| 22 F55B11.1            | FFLGYRK                    | 25 | 823   | 0.39 | 0.11 | 28  |
| 7 F55B11.1             | ESTGAILAVPASLAAK           | 44 | 2120  | 0.40 | 0.14 | 36  |
| 22 F55B11.1            | HFVIHSSLNDNEQVIK           | 22 | 1953  | 0.40 | 0.09 | 23  |
| 10 F55B11.1            | ESTGAILAVPASLAAK           | 43 | 2746  | 0.41 | 0.14 | 35  |
| 7 F55B11.1             | FFLGYRK                    | 20 | 1296  | 0.43 | 0.17 | 39  |
| 22 F55B11.1            | RIGGGFGGK                  | 17 | 1024  | 0.45 | 0.18 | 40  |
| 22 F55B11.1            | FFLGYRK                    | 18 | 740   | 0.48 | 0.11 | 22  |
| 10 F55B11.1            | ESTGAILAVPASLAAK           | 43 | 3251  | 0.48 | 0.10 | 20  |
| 10 F55B11.1            | AVTTVEGIGSVAK              | 14 | 1472  | 0.51 | 0.14 | 28  |
| 10 F55B11.1            | ESTGAILAVPASLAAK           | 32 | 3263  | 0.51 | 0.19 | 38  |
| 10 F55B11.1            | ESTGAILAVPASLAAK           | 32 | 1639  | 0.51 | 0.08 | 16  |
| 10 F55B11.1            | ESTGAILAVPASLAAK           | 34 | 1774  | 0.53 | 0.08 | 15  |
| 10 F55B11.1            | AVTTVEGIGSVAK              | 68 | 2562  | 0.53 | 0.08 | 15  |
| 22 F55B11.1            | ALGLLSDELK                 | 19 | 763   | 0.54 | 0.10 | 18  |
| 7 F55B11.1             | LALTTMEK                   | 31 | 952   | 0.55 | 0.23 | 42  |
| 10 F55B11.1            | QALEAESFVK                 | 51 | 708   | 0.56 | 0.16 | 29  |
| 7 F55B11.1             | ESTGAILAVPASLAAK           | 13 | 2664  | 0.57 | 0.11 | 20  |
| 7 F55B11.1             | AVTTVEGIGSVAK              | 67 | 1360  | 0.57 | 0.22 | 38  |
| 22 F55B11.1            | ANQPAHDPLGRPIK             | 10 | 2956  | 0.57 | 0.46 | 80  |
| 10 F55B11.1            | ESTGAILAVPASLAAK           | 15 | 1857  | 0.58 | 0.15 | 26  |
| 7 F55B11.1             | FFLGYRK                    | 18 | 1418  | 0.59 | 0.09 | 15  |
| 7 F55B11.1             | FFLGYRK                    | 28 | 2227  | 0.59 | 0.09 | 15  |
| 7 F55B11.1             | NSDYDNRLEEVK               | 11 | 1066  | 0.59 | 0.24 | 40  |
| 10 F55B11.1            | AVTTVEGIGSVAK              | 66 | 1464  | 0.60 | 0.11 | 18  |

|             |                   |     |       |       |      |     |
|-------------|-------------------|-----|-------|-------|------|-----|
| 10 F55B11.1 | QALEAESFVK        | 102 | 2163  | 0.60  | 0.14 | 24  |
| 1 F55B11.1  | AVTTVEGIGSVAK     | 55  | 1698  | 0.60  | 0.20 | 33  |
| 10 F55B11.1 | RIGGGFGGK         | 12  | 2692  | 0.61  | 0.11 | 19  |
| 7 F55B11.1  | AVTTVEGIGSVAK     | 51  | 1346  | 0.62  | 0.17 | 27  |
| 7 F55B11.1  | ANQPAHDPLGRPIK    | 11  | 2216  | 0.66  | 0.17 | 26  |
| 22 F55B11.1 | RIGGGFGGK         | 15  | 1132  | 0.67  | 0.32 | 48  |
| 22 F55B11.1 | HFVIHSSLNDNEQVIK  | 25  | 1565  | 0.68  | 0.18 | 27  |
| 7 F55B11.1  | FFLGYRK           | 20  | 2234  | 0.69  | 0.08 | 12  |
| 7 F55B11.1  | FFLGYRK           | 32  | 1797  | 0.69  | 0.12 | 18  |
| 7 F55B11.1  | TVIQQDEIIK        | 10  | 1016  | 0.70  | 0.15 | 22  |
| 7 F55B11.1  | FFLGYRK           | 20  | 1555  | 0.71  | 0.19 | 27  |
| 10 F55B11.1 | ALGLLSDELK        | 15  | 726   | 0.74  | 0.14 | 19  |
| 1 F55B11.1  | AVTTVEGIGSVAK     | 58  | 2012  | 0.76  | 0.17 | 23  |
| 7 F55B11.1  | LALTTMEK          | 11  | 805   | 0.77  | 0.09 | 12  |
| 7 F55B11.1  | RIGGGFGGK         | 19  | 1154  | 0.77  | 0.15 | 20  |
| 10 F55B11.1 | QALEAESFVK        | 78  | 1578  | 0.79  | 0.12 | 16  |
| 1 F55B11.1  | AVIVPLLEENEHFAAYK | 40  | 974   | 0.81  | 0.18 | 22  |
| 1 F55B11.1  | ESTGAILAVPASLAAK  | 28  | 1823  | 0.84  | 0.05 | 6   |
| 10 F55B11.1 | HFVIHSSLNDNEQVIK  | 11  | 1496  | 0.85  | 0.26 | 30  |
| 1 F55B11.1  | LALTTMEK          | 42  | 851   | 0.85  | 0.10 | 11  |
| 10 F55B11.1 | HFVIHSSLNDNEQVIK  | 41  | 4273  | 0.85  | 0.19 | 22  |
| 1 F55B11.1  | AVTTVEGIGSVAK     | 44  | 1578  | 0.86  | 0.20 | 24  |
| 1 F55B11.1  | ESTGAILAVPASLAAK  | 12  | 1464  | 0.90  | 0.10 | 11  |
| 7 F55B11.1  | FFLGYRK           | 23  | 1234  | 0.90  | 0.14 | 15  |
| 1 F55B11.1  | ESTGAILAVPASLAAK  | 29  | 1531  | 0.92  | 0.12 | 13  |
| 7 F55B11.1  | QALEAESFVK        | 55  | 1291  | 0.98  | 0.14 | 14  |
| 1 F55B11.1  | QALEAESFVK        | 63  | 1115  | 1.00  | 0.11 | 11  |
| 10 F55B11.1 | QALEAESFVK        | 79  | 771   | 1.04  | 0.09 | 9   |
| 1 F55B11.1  | TVIQQDEIIK        | 13  | 882   | 1.05  | 0.12 | 11  |
| 1 F55B11.1  | AVTTVEGIGSVAK     | 45  | 1644  | 1.07  | 0.14 | 13  |
| 1 F55B11.1  | AVTTVEGIGSVAK     | 46  | 1780  | 1.09  | 0.11 | 11  |
| 10 F55B11.1 | HFVIHSSLNDNEQVIK  | 11  | 1640  | 1.10  | 0.28 | 25  |
| 22 F55B11.1 | LALTTMEK          | 16  | 746   | 1.10  | 0.25 | 23  |
| 10 F55B11.1 | FFLGYRK           | 15  | 1247  | 1.18  | 0.12 | 11  |
| 1 F55B11.1  | AVTTVEGIGSVAK     | 52  | 1626  | 1.20  | 0.24 | 20  |
| 10 F55B11.1 | FFLGYRK           | 27  | 1446  | 1.22  | 0.10 | 9   |
| 10 F55B11.1 | FFLGYRK           | 18  | 1723  | 1.34  | 0.15 | 11  |
| 1 F55B11.1  | QALEAESFVK        | 74  | 1096  | 1.41  | 0.14 | 10  |
| 10 F55B11.1 | FFLGYRK           | 16  | 1482  | 1.41  | 0.10 | 7   |
| 22 F55B11.1 | AVTTVEGIGSVAK     | 37  | 1322  | 1.76  | 0.28 | 16  |
| 1 F55B11.1  | HFVIHSSLNDNEQVIK  | 29  | 1451  | 1.86  | 0.26 | 14  |
| 1 F55B11.1  | FFLGYRK           | 15  | 511   | 1.89  | 0.07 | 4   |
| 1 F55B11.1  | AVIVPLLEENEHFAAYK | 20  | 563   | 2.00  | 0.21 | 10  |
| 22 F55B11.1 | HFVIHSSLNDNEQVIK  | 45  | 1901  | 2.00  | 0.27 | 14  |
| 22 F55B11.1 | ALGLLSDELK        | 22  | 719   | 2.83  | 0.14 | 5   |
| 22 F55B11.1 | HFVIHSSLNDNEQVIK  | 33  | 2487  | 3.71  | 0.43 | 12  |
| 22 F55B11.1 | LALTTMEK          | 29  | 1528  | 4.56  | 0.26 | 6   |
| 22 F55B11.1 | LALTTMEK          | 31  | 1200  | 5.43  | 0.54 | 10  |
| 22 F55B11.1 | HFVIHSSLNDNEQVIK  | 43  | 4047  | 5.48  | 0.51 | 9   |
| 22 F55B11.1 | ALGLLSDELK        | 27  | 791   | 5.50  | 0.16 | 3   |
| 22 F55B11.1 | AVTTVEGIGSVAK     | 38  | 1580  | 5.70  | 0.55 | 10  |
| 22 F55B11.1 | QALEAESFVK        | 80  | 2169  | 7.35  | 0.44 | 6   |
| 22 F55B11.1 | QALEAESFVK        | 79  | 1516  | 7.57  | 0.46 | 6   |
| 22 F55B11.1 | ALGLLSDELK        | 50  | 1560  | 8.84  | 0.26 | 3   |
| 22 F55B11.1 | RIGGGFGGK         | 23  | 3963  | 9.16  | 0.45 | 5   |
| 22 F55B11.1 | ESTGAILAVPASLAAK  | 23  | 3160  | 10.38 | 0.18 | 2   |
| 22 F55B11.1 | ESTGAILAVPASLAAK  | 34  | 3243  | 10.63 | 0.16 | 2   |
| 22 F55B11.1 | RIGGGFGGK         | 24  | 2918  | 12.92 | 0.14 | 1   |
| 22 F55B11.2 | LNSISTLYNIGLMNK   | 48  | 1946  | 0.57  | 0.24 | 42  |
| 22 F55B11.2 | LNSISTLYNIGLMNK   | 58  | 1811  | 0.72  | 0.25 | 34  |
| 1 F55C5.5   | APEGTTLFGASHPK    | 13  | 1361  | 0.55  | 0.18 | 32  |
| 10 F55C5.5  | APEGTTLFGASHPK    | 41  | 4157  | 0.64  | 0.14 | 22  |
| 7 F55C5.5   | APEGTTLFGASHPK    | 43  | 5052  | 0.72  | 0.19 | 26  |
| 10 F55C5.5  | APEGTTLFGASHPK    | 54  | 7335  | 0.94  | 0.08 | 9   |
| 10 F55C5.5  | APEGTTLFGASHPK    | 33  | 3539  | 1.05  | 0.21 | 20  |
| 22 F55C5.5  | DLLSNISNSVLAK     | 40  | 456   | 1.14  | 0.13 | 12  |
| 10 F55C5.5  | DLLSNISNSVLAK     | 46  | 558   | 1.28  | 0.19 | 15  |
| 22 F55C5.5  | APEGTTLFGASHPK    | 68  | 5262  | 1.45  | 0.14 | 10  |
| 22 F55C5.5  | APEGTTLFGASHPK    | 38  | 4574  | 1.58  | 0.13 | 8   |
| 1 F55C5.5   | APEGTTLFGASHPK    | 76  | 7717  | 1.68  | 0.12 | 7   |
| 1 F55C5.5   | APEGTTLFGASHPK    | 56  | 6338  | 2.35  | 0.15 | 6   |
| 1 F55C5.8   | AVLHATNLEK        | 17  | 2262  | 0.63  | 0.18 | 28  |
| 22 F55C5.8  | AYLEFLK           | 11  | 617   | 0.93  | 0.16 | 17  |
| 10 F55C5.8  | AVLHATNLEK        | 17  | 7546  | 1.61  | 0.14 | 8   |
| 10 F55D10.1 | HIVLFTDVK         | 23  | 1130  | 0.80  | 0.30 | 37  |
| 7 F55D10.1  | HIVLFTDVK         | 42  | 2507  | 1.06  | 0.13 | 13  |
| 10 F55D10.1 | HIVLFTDVK         | 14  | 974   | 1.09  | 0.21 | 19  |
| 7 F55D10.1  | HIVLFTDVK         | 51  | 2132  | 1.11  | 0.12 | 11  |
| 22 F55D10.1 | GVSEVEVVINDFMK    | 17  | 920   | 1.73  | 0.10 | 6   |
| 22 F55F10.1 | RIPANLLK          | 17  | 911   | 1.29  | 0.16 | 13  |
| 7 F55H2.2   | EAAFSLAEAK        | 60  | 2287  | 0.31  | 0.31 | 101 |
| 7 F55H2.2   | EAAFSLAEAK        | 60  | 5628  | 0.36  | 0.16 | 45  |
| 1 F55H2.2   | EAAFSLAEAK        | 63  | 2370  | 0.49  | 0.11 | 22  |
| 7 F55H2.2   | EAAFSLAEAK        | 55  | 7608  | 0.55  | 0.24 | 44  |
| 22 F55H2.2  | VLMGEVMK          | 20  | 1153  | 0.55  | 0.12 | 21  |
| 22 F55H2.2  | VLMGEVMK          | 29  | 2592  | 0.60  | 0.17 | 29  |
| 1 F55H2.2   | EAAFSLAEAK        | 36  | 2131  | 0.65  | 0.20 | 31  |
| 7 F55H2.2   | GGANIARLK         | 28  | 4328  | 0.84  | 0.12 | 15  |
| 10 F55H2.2  | EAAFSLAEAK        | 46  | 3424  | 0.91  | 0.19 | 21  |
| 22 F55H2.2  | VLMGEVMK          | 19  | 1151  | 0.97  | 0.18 | 19  |
| 22 F55H2.2  | VLMGEVMK          | 25  | 1394  | 1.00  | 0.33 | 33  |
| 7 F55H2.2   | GGANIARLK         | 44  | 3982  | 1.05  | 0.14 | 14  |
| 22 F55H2.2  | VLMGEVMK          | 39  | 1307  | 1.09  | 0.19 | 17  |
| 22 F55H2.2  | EAAFSLAEAK        | 32  | 849   | 1.13  | 0.15 | 13  |
| 22 F55H2.2  | VLMGEVMK          | 20  | 1192  | 1.27  | 0.18 | 14  |
| 22 F55H2.2  | EAAFSLAEAK        | 86  | 3063  | 1.30  | 0.17 | 13  |
| 22 F55H2.2  | VLMGEVMK          | 41  | 1350  | 1.31  | 0.17 | 13  |
| 10 F55H2.2  | GGANIARLK         | 36  | 11853 | 1.35  | 0.09 | 7   |
| 10 F55H2.2  | GGANIARLK         | 43  | 11398 | 1.39  | 0.17 | 12  |
| 22 F55H2.2  | GGANIARLK         | 22  | 3348  | 1.79  | 0.13 | 7   |
| 22 F55H2.2  | GGANIARLK         | 26  | 3877  | 1.80  | 0.06 | 4   |

|                                  |                  |     |       |      |      |     |
|----------------------------------|------------------|-----|-------|------|------|-----|
| 22 F55H2.6                       | ERSLAHLLVPQPK    | 42  | 3063  | 0.16 | 0.23 | 140 |
| 22 F55H2.6                       | YHELLEDAAHK      | 42  | 2659  | 0.30 | 0.20 | 66  |
| 22 F55H2.6                       | YHELLEDAAHK      | 24  | 2157  | 0.32 | 0.20 | 64  |
| 10 F55H2.6                       | ERSLAHLLVPQPK    | 19  | 7133  | 0.59 | 0.15 | 25  |
| 7 F55H2.6                        | FTELHDIQK        | 40  | 2954  | 0.59 | 0.12 | 21  |
| 10 F55H2.6                       | VYPQILK          | 14  | 1246  | 0.63 | 0.13 | 20  |
| 10 F55H2.6                       | ERSLAHLLVPQPK    | 20  | 5864  | 0.70 | 0.14 | 20  |
| 7 F55H2.6                        | ERSLAHLLVPQPK    | 11  | 4394  | 0.79 | 0.24 | 31  |
| 7 F55H2.6                        | ERSLAHLLVPQPK    | 25  | 5122  | 0.79 | 0.14 | 18  |
| 7 F55H2.6                        | FTELHDIQK        | 34  | 3598  | 0.81 | 0.15 | 19  |
| 10 F55H2.6                       | VYPQILK          | 10  | 1180  | 0.83 | 0.07 | 8   |
| 1 F55H2.6                        | ERSLAHLLVPQPK    | 21  | 5115  | 0.85 | 0.11 | 12  |
| 22 F55H2.6                       | FTELHDIQK        | 34  | 5298  | 0.86 | 0.12 | 14  |
| 1 F55H2.6                        | YHELLEDAAHK      | 17  | 1191  | 0.88 | 0.16 | 19  |
| 10 F55H2.6                       | ERSLAHLLVPQPK    | 12  | 2452  | 0.93 | 0.10 | 10  |
| 10 F55H2.6                       | YHELLEDAAHK      | 18  | 5996  | 0.96 | 0.13 | 13  |
| 22 F55H2.6                       | FTELHDIQK        | 43  | 3483  | 0.98 | 0.14 | 15  |
| 1 F55H2.6                        | ERSLAHLLVPQPK    | 24  | 1721  | 1.00 | 0.12 | 12  |
| 10 F55H2.6                       | YHELLEDAAHK      | 38  | 4503  | 1.02 | 0.08 | 8   |
| 10 F55H2.6                       | YHELLEDAAHK      | 25  | 6898  | 1.10 | 0.14 | 13  |
| 22 F55H2.6                       | ERSLAHLLVPQPK    | 11  | 4156  | 1.12 | 0.10 | 9   |
| 1 F55H2.6                        | ERSLAHLLVPQPK    | 36  | 5288  | 1.13 | 0.14 | 12  |
| 22 F55H2.6                       | YHELLEDAAHK      | 19  | 4411  | 1.13 | 0.13 | 11  |
| 10 F55H2.6                       | YHELLEDAAHK      | 29  | 1434  | 1.15 | 0.26 | 23  |
| 22 F55H2.6                       | YHELLEDAAHK      | 12  | 4077  | 1.15 | 0.08 | 7   |
| 22 F55H2.6                       | ERSLAHLLVPQPK    | 22  | 6152  | 1.16 | 0.17 | 14  |
| 22 F55H2.6                       | ERSLAHLLVPQPK    | 29  | 8069  | 1.17 | 0.09 | 8   |
| 7 F55H2.6                        | YHELLEDAAHK      | 30  | 2250  | 1.26 | 0.10 | 8   |
| 22 F55H2.6                       | YHELLEDAAHK      | 30  | 3976  | 1.27 | 0.10 | 8   |
| 22 F55H2.6                       | ERSLAHLLVPQPK    | 23  | 4728  | 1.28 | 0.16 | 13  |
| 7 F55H2.6                        | YHELLEDAAHK      | 24  | 3492  | 1.29 | 0.15 | 11  |
| 1 F55H2.6                        | MLPHTVISEK       | 11  | 785   | 1.31 | 0.18 | 13  |
| 10 F55H2.6                       | ERSLAHLLVPQPK    | 23  | 4839  | 1.34 | 0.10 | 8   |
| 22 F55H2.6                       | ERSLAHLLVPQPK    | 17  | 5133  | 1.36 | 0.21 | 15  |
| 7 F55H2.6                        | YHELLEDAAHK      | 29  | 1781  | 1.44 | 0.27 | 19  |
| 22 F55H2.6                       | YHELLEDAAHK      | 23  | 6407  | 1.48 | 0.10 | 7   |
| 1 F55H2.6                        | ERSLAHLLVPQPK    | 23  | 4714  | 1.49 | 0.22 | 15  |
| 10 F55H2.6                       | ERSLAHLLVPQPK    | 10  | 5421  | 1.53 | 0.08 | 5   |
| 22 F55H2.6                       | YHELLEDAAHK      | 33  | 3652  | 1.55 | 0.12 | 8   |
| 10 F55H2.6                       | ERSLAHLLVPQPK    | 14  | 5522  | 1.55 | 0.13 | 8   |
| 7 F55H2.6                        | YHELLEDAAHK      | 41  | 3093  | 1.56 | 0.12 | 7   |
| 10 F55H2.6                       | ERSLAHLLVPQPK    | 15  | 5502  | 1.57 | 0.13 | 8   |
| 22 F55H2.6                       | ERSLAHLLVPQPK    | 21  | 4413  | 1.57 | 0.12 | 8   |
| 10 F55H2.6                       | YHELLEDAAHK      | 29  | 6561  | 1.68 | 0.11 | 7   |
| 10 F55H2.6                       | VYPQILK          | 11  | 1102  | 1.75 | 0.14 | 8   |
| 1 F55H2.6                        | ERSLAHLLVPQPK    | 13  | 2520  | 1.94 | 0.17 | 9   |
| 1 F55H2.6                        | MLPHTVISEK       | 11  | 1534  | 2.03 | 0.14 | 7   |
| 22 F55H2.6                       | YHELLEDAAHK      | 17  | 6152  | 2.08 | 0.18 | 9   |
| 1 F55H2.6                        | ERSLAHLLVPQPK    | 26  | 2469  | 2.54 | 0.19 | 7   |
| 10 F55H2.6                       | YHELLEDAAHK      | 34  | 3276  | 2.66 | 0.14 | 5   |
| 22 F55H2.6                       | YHELLEDAAHK      | 34  | 2522  | 2.76 | 0.30 | 11  |
| 22 F55H2.6                       | YHELLEDAAHK      | 27  | 2522  | 3.04 | 0.41 | 13  |
| 22 F55H2.6                       | ERSLAHLLVPQPK    | 30  | 4462  | 4.18 | 0.41 | 10  |
| 22 F55H2.6                       | ERSLAHLLVPQPK    | 33  | 5825  | 4.62 | 0.15 | 3   |
| 22 F55H2.6                       | ERSLAHLLVPQPK    | 22  | 5543  | 5.56 | 0.50 | 9   |
| 10 F56B3.5                       | IIPRGPIAVK       | 17  | 8867  | 0.61 | 0.10 | 17  |
| 22 F56B3.5                       | ELIYTAEVINGADAAK | 124 | 3125  | 0.64 | 0.11 | 18  |
| 10 F56B3.5                       | ELIYTAEVINGADAAK | 95  | 3794  | 0.64 | 0.11 | 17  |
| 10 F56B3.5                       | IIPRGPIAVK       | 16  | 6705  | 0.64 | 0.12 | 18  |
| 1 F56B3.5                        | IIPRGPIAVK       | 19  | 2915  | 0.67 | 0.09 | 13  |
| 7 F56B3.5                        | LGVVNHVVEANPIEK  | 35  | 3071  | 0.68 | 0.18 | 26  |
| 22 F56B3.5                       | IIPRGPIAVK       | 25  | 4493  | 0.70 | 0.14 | 20  |
| 10 F56B3.5                       | ELIYTAEVINGADAAK | 92  | 3589  | 0.73 | 0.13 | 18  |
| 22 F56B3.5                       | LGVVNHVVEANPIEK  | 30  | 4332  | 0.86 | 0.18 | 21  |
| 1 F56B3.5                        | ELIYTAEVINGADAAK | 56  | 1421  | 0.88 | 0.08 | 9   |
| 1 F56B3.5                        | LGVVNHVVEANPIEK  | 49  | 1916  | 0.89 | 0.26 | 29  |
| 1 F56B3.5                        | ELIYTAEVINGADAAK | 56  | 1437  | 0.89 | 0.17 | 18  |
| 10 F56B3.5                       | LGVVNHVVEANPIEK  | 44  | 7881  | 0.92 | 0.20 | 22  |
| 10 F56B3.5                       | LGVVNHVVEANPIEK  | 41  | 6211  | 0.93 | 0.14 | 15  |
| 1 F56B3.5                        | LGVVNHVVEANPIEK  | 31  | 1774  | 0.94 | 0.16 | 17  |
| 7 F56B3.5                        | TRVVILNSK        | 12  | 1031  | 0.95 | 0.21 | 22  |
| 1 F56B3.5                        | IIPRGPIAVK       | 11  | 1946  | 0.98 | 0.10 | 10  |
| 22 F56B3.5                       | ELIYTAEVINGADAAK | 84  | 1746  | 1.01 | 0.09 | 9   |
| 22 F56B3.5                       | IIPRGPIAVK       | 12  | 2491  | 1.04 | 0.09 | 9   |
| 7 F56B3.5                        | TRVVILNSK        | 20  | 1098  | 1.06 | 0.14 | 13  |
| 22 F56B3.5                       | IIPRGPIAVK       | 14  | 3491  | 1.12 | 0.27 | 24  |
| 7 F56B3.5                        | IIPRGPIAVK       | 11  | 2204  | 1.23 | 0.19 | 16  |
| 10 F56B3.5                       | IIPRGPIAVK       | 12  | 2670  | 1.25 | 0.03 | 2   |
| 22 F56B3.5                       | ELIYTAEVINGADAAK | 97  | 2247  | 1.27 | 0.16 | 12  |
| 1 F56B3.5                        | LGVVNHVVEANPIEK  | 26  | 1700  | 1.40 | 0.13 | 9   |
| 22 F56B3.5                       | TRVVILNSK        | 21  | 2170  | 1.89 | 0.09 | 5   |
| 22 F56B3.5                       | TRVVILNSK        | 16  | 1732  | 2.14 | 0.10 | 5   |
| 1 F56B3.5                        | TRVVILNSK        | 14  | 2099  | 2.44 | 0.33 | 13  |
| 1 F56B3.5                        | TRVVILNSK        | 14  | 2306  | 2.75 | 0.13 | 5   |
| 22 F56D12.1a;F56D12.1b;F56D12.1d | TGYFIEPTLITVTDPK | 55  | 1054  | 0.44 | 0.07 | 17  |
| 22 F56D12.1a;F56D12.1b;F56D12.1d | VAENLDNYVTFPK    | 39  | 1301  | 0.76 | 0.16 | 21  |
| 22 F56D12.1a;F56D12.1b;F56D12.1d | TGADGANVVLGGK    | 12  | 1349  | 0.77 | 0.12 | 16  |
| 22 F56D12.1a;F56D12.1b;F56D12.1d | VAENLDNYVTFPK    | 17  | 1461  | 0.86 | 0.10 | 11  |
| 22 F56D12.1a;F56D12.1b;F56D12.1d | ERQDLEAALAFYSK   | 16  | 3080  | 0.89 | 0.13 | 15  |
| 22 F56D12.1a;F56D12.1b;F56D12.1d | TNEPILEYRK       | 14  | 3014  | 0.95 | 0.20 | 21  |
| 22 F56D12.1a;F56D12.1b;F56D12.1d | QVIPSDHRSTLAK    | 10  | 11735 | 0.98 | 0.07 | 7   |
| 22 F56D12.1a;F56D12.1b;F56D12.1d | VAENLDNYVTFPK    | 28  | 1897  | 1.04 | 0.06 | 6   |
| 22 F56D12.1a;F56D12.1b;F56D12.1d | QVIPSDHRSTLAK    | 17  | 14171 | 1.21 | 0.30 | 25  |
| 7 F56D12.1a;F56D12.1b;F56D12.1d  | QVIPSDHRSTLAK    | 10  | 4574  | 1.25 | 0.19 | 15  |
| 22 F56D12.1a;F56D12.1b;F56D12.1d | QVIPSDHRSTLAK    | 17  | 10265 | 1.26 | 0.37 | 29  |
| 22 F56D12.1a;F56D12.1b;F56D12.1d | NITEVPLRIGDK     | 16  | 751   | 1.28 | 0.17 | 13  |
| 22 F56D12.1a;F56D12.1b;F56D12.1d | NITEVPLRIGDK     | 11  | 507   | 1.33 | 0.24 | 18  |
| 7 F56D12.1a;F56D12.1b;F56D12.1d  | QVIPSDHRSTLAK    | 11  | 12745 | 1.35 | 0.08 | 6   |
| 22 F56D12.1a;F56D12.1b;F56D12.1d | NITEVPLRIGDK     | 12  | 946   | 1.48 | 0.11 | 7   |
| 22 F56D12.1a;F56D12.1b;F56D12.1d | TGADGANVVLGGK    | 23  | 1312  | 1.57 | 0.20 | 12  |
| 7 F56D12.1a;F56D12.1b;F56D12.1d  | QVIPSDHRSTLAK    | 12  | 14521 | 1.60 | 0.25 | 16  |

|                                            |                            |     |       |      |      |     |
|--------------------------------------------|----------------------------|-----|-------|------|------|-----|
| 10 F56D12.1b;F56D12.1a;F56D12.1d;F56D12.1c | VAENLDNYVTFPK              | 19  | 788   | 0.50 | 0.12 | 23  |
| 10 F56D12.1b;F56D12.1a;F56D12.1d;F56D12.1c | VAENLDNYVTFPK              | 32  | 1482  | 0.60 | 0.19 | 31  |
| 10 F56D12.1b;F56D12.1a;F56D12.1d;F56D12.1c | VAENLDNYVTFPK              | 11  | 1059  | 0.61 | 0.16 | 27  |
| 10 F56D12.1b;F56D12.1a;F56D12.1d;F56D12.1c | TGYFIEPTLITVTDPK           | 36  | 961   | 0.66 | 0.12 | 18  |
| 10 F56D12.1b;F56D12.1a;F56D12.1d;F56D12.1c | QVIPSDHRSTLAK              | 12  | 24344 | 0.70 | 0.20 | 29  |
| 10 F56D12.1b;F56D12.1a;F56D12.1d;F56D12.1c | VAENLDNYVTFPK              | 37  | 2222  | 0.74 | 0.11 | 15  |
| 10 F56D12.1b;F56D12.1a;F56D12.1d;F56D12.1c | TGYFIEPTLITVTDPK           | 54  | 1383  | 0.80 | 0.14 | 18  |
| 10 F56D12.1b;F56D12.1a;F56D12.1d;F56D12.1c | VAENLDNYVTFPK              | 14  | 940   | 0.83 | 0.21 | 25  |
| 10 F56D12.1b;F56D12.1a;F56D12.1d;F56D12.1c | ERQDLEAALAFYSK             | 27  | 4518  | 0.88 | 0.11 | 13  |
| 10 F56D12.1b;F56D12.1a;F56D12.1d;F56D12.1c | VAENLDNYVTFPK              | 20  | 1622  | 0.91 | 0.12 | 13  |
| 10 F56D12.1b;F56D12.1a;F56D12.1d;F56D12.1c | VAENLDNYVTFPK              | 26  | 1270  | 0.93 | 0.16 | 17  |
| 10 F56D12.1b;F56D12.1a;F56D12.1d;F56D12.1c | QVIPSDHRSTLAK              | 13  | 25189 | 0.93 | 0.06 | 6   |
| 10 F56D12.1b;F56D12.1a;F56D12.1d;F56D12.1c | TGADGANVVVLGGK             | 21  | 1446  | 0.99 | 0.10 | 11  |
| 10 F56D12.1b;F56D12.1a;F56D12.1d;F56D12.1c | QVIPSDHRSTLAK              | 14  | 12699 | 1.05 | 0.09 | 9   |
| 10 F56D12.1b;F56D12.1a;F56D12.1d;F56D12.1c | ERQDLEAALAFYSK             | 20  | 3188  | 1.08 | 0.10 | 10  |
| 10 F56D12.1b;F56D12.1a;F56D12.1d;F56D12.1c | VAENLDNYVTFPK              | 36  | 1475  | 1.09 | 0.20 | 18  |
| 10 F56D12.1b;F56D12.1a;F56D12.1d;F56D12.1c | TNEPILEYRK                 | 13  | 3622  | 1.31 | 0.19 | 15  |
| 1 F56D12.1b;F56D12.1c                      | VAENLDNYVTFPK              | 28  | 557   | 0.79 | 0.22 | 28  |
| 1 F56D12.1b;F56D12.1c                      | QVIPSDHRSTLAK              | 12  | 8275  | 0.87 | 0.13 | 15  |
| 1 F56D12.1b;F56D12.1c                      | QVIPSDHRSTLAK              | 11  | 7979  | 1.14 | 0.12 | 10  |
| 1 F56D12.1b;F56D12.1c                      | VAENLDNYVTFPK              | 13  | 507   | 1.22 | 0.11 | 9   |
| 1 F56D12.1b;F56D12.1c                      | QVIPSDHRSTLAK              | 16  | 7288  | 1.80 | 0.10 | 6   |
| 1 F56D12.1b;F56D12.1c                      | DATPYGLTGAVFSQDK           | 33  | 504   | 2.11 | 0.07 | 3   |
| 22 F56D12.5a                               | EVIPDREEDEVVVIHK           | 36  | 11241 | 0.51 | 0.13 | 24  |
| 1 F56D12.5a                                | TAEELAYEAELAVLAK           | 88  | 994   | 0.52 | 0.16 | 31  |
| 10 F56D12.5a                               | DELAGETENIAPEGAESTEPEVPREK | 46  | 2770  | 0.57 | 0.18 | 31  |
| 22 F56D12.5a                               | EVIPDREEDEVVVIHK           | 43  | 14097 | 0.60 | 0.10 | 17  |
| 10 F56D12.5a                               | TAEELAYEAELAVLAK           | 103 | 1384  | 0.63 | 0.20 | 32  |
| 22 F56D12.5a                               | TAEELAYEAELAVLAK           | 97  | 2262  | 0.65 | 0.17 | 27  |
| 1 F56D12.5a                                | TAEELAYEAELAVLAK           | 75  | 583   | 0.65 | 0.22 | 33  |
| 22 F56D12.5a                               | EVIPDREEDEVVVIHK           | 84  | 18076 | 0.70 | 0.14 | 20  |
| 22 F56D12.5a                               | EVIPDREEDEVVVIHK           | 69  | 10533 | 0.71 | 0.13 | 18  |
| 1 F56D12.5a                                | TAEELAYEAELAVLAK           | 76  | 773   | 0.75 | 0.23 | 30  |
| 1 F56D12.5a                                | EVIPDREEDEVVVIHK           | 39  | 7906  | 0.79 | 0.10 | 13  |
| 22 F56D12.5a                               | TAEELAYEAELAVLAK           | 72  | 1803  | 0.84 | 0.11 | 14  |
| 1 F56D12.5a                                | EVIPDREEDEVVVIHK           | 37  | 6121  | 0.85 | 0.11 | 13  |
| 22 F56D12.5a                               | TAEELAYEAELAVLAK           | 67  | 858   | 0.96 | 0.18 | 18  |
| 22 F56D12.5a                               | EVIPDREEDEVVVIHK           | 49  | 16880 | 1.01 | 0.11 | 11  |
| 10 F56D12.5a                               | EVIPDREEDEVVVIHK           | 51  | 10740 | 1.06 | 0.24 | 23  |
| 22 F56D12.5a                               | EVIPDREEDEVVVIHK           | 50  | 11945 | 1.15 | 0.08 | 7   |
| 1 F56D12.5a                                | EVIPDREEDEVVVIHK           | 44  | 4626  | 1.18 | 0.16 | 14  |
| 10 F56D12.5a                               | EVIPDREEDEVVVIHK           | 28  | 3249  | 1.61 | 0.10 | 6   |
| 10 F56D12.5a                               | EVIPDREEDEVVVIHK           | 34  | 5718  | 1.92 | 0.19 | 10  |
| 10 F56D12.5a                               | TAEELAYEAELAVLAK           | 59  | 1942  | 4.25 | 0.10 | 2   |
| 10 F56D12.5a                               | TAEELAYEAELAVLAK           | 71  | 1609  | 6.29 | 0.14 | 2   |
| 7 F56D12.5a;F56D12.5b                      | EVIPDREEDEVVVIHK           | 30  | 10649 | 0.70 | 0.17 | 25  |
| 7 F56D12.5a;F56D12.5b                      | TAEELAYEAELAVLAK           | 62  | 1129  | 0.80 | 0.16 | 20  |
| 7 F56D12.5a;F56D12.5b                      | TAEELAYEAELAVLAK           | 112 | 1510  | 0.81 | 0.17 | 21  |
| 7 F56D12.5a;F56D12.5b                      | EVIPDREEDEVVVIHK           | 22  | 19022 | 1.40 | 0.13 | 9   |
| 22 F56D2.1                                 | VVDILADVLRNSK              | 24  | 943   | 0.34 | 0.27 | 81  |
| 22 F56D2.1                                 | DVLASAPQAEVTTLK            | 40  | 2631  | 0.68 | 0.15 | 23  |
| 22 F56D2.1                                 | VVDILADVLRNSK              | 21  | 890   | 0.70 | 0.21 | 30  |
| 22 F56D2.1                                 | YFGDLSNEYPRK               | 37  | 3896  | 0.74 | 0.09 | 12  |
| 22 F56D2.1                                 | YFGDLSNEYPRK               | 59  | 7158  | 0.84 | 0.07 | 8   |
| 10 F56D2.1                                 | VVDILADVLRNSK              | 18  | 1275  | 0.93 | 0.14 | 15  |
| 22 F56D2.1                                 | DVLASAPQAEVTTLK            | 26  | 2809  | 0.94 | 0.09 | 10  |
| 22 F56D2.1                                 | YFGDLSNEYPRK               | 38  | 8238  | 1.02 | 0.13 | 13  |
| 10 F56D2.1                                 | VVDILADVLRNSK              | 26  | 1485  | 1.02 | 0.15 | 14  |
| 7 F56D2.1                                  | DVLASAPQAEVTTLK            | 51  | 1986  | 1.13 | 0.12 | 11  |
| 7 F56D2.1                                  | RASAALESELNAIGAK           | 29  | 2853  | 1.32 | 0.16 | 12  |
| 22 F56D2.1                                 | HLASAATEEEVAMAK            | 118 | 4460  | 1.33 | 0.14 | 11  |
| 22 F56D2.1                                 | VVDILADVLRNSK              | 38  | 1859  | 1.35 | 0.15 | 11  |
| 22 F56D2.1                                 | SVAHEWK                    | 15  | 6992  | 1.37 | 0.09 | 6   |
| 22 F56D2.1                                 | SVAHEWK                    | 22  | 6459  | 1.41 | 0.09 | 6   |
| 22 F56D2.1                                 | RASAALESELNAIGAK           | 75  | 11148 | 1.51 | 0.17 | 11  |
| 22 F56D2.1                                 | RASAALESELNAIGAK           | 51  | 7061  | 1.55 | 0.11 | 7   |
| 7 F56D2.1                                  | DVLASAPQAEVTTLK            | 15  | 596   | 1.86 | 0.15 | 8   |
| 10 F56D2.1                                 | YFGDLSNEYPRK               | 19  | 1755  | 1.87 | 0.24 | 13  |
| 22 F56D5.2                                 | GSMERSQRSLK                | 16  | 1717  | 1.49 | 0.36 | 24  |
| 10 F56D5.9                                 | IEELFK                     | 18  | 2064  | 0.46 | 0.05 | 11  |
| 10 F56D5.9                                 | IEELFK                     | 14  | 1850  | 0.51 | 0.09 | 17  |
| 10 F56F3.5                                 | LIAEDVQGK                  | 33  | 7179  | 0.11 | 0.26 | 235 |
| 10 F56F3.5                                 | LIAEDVQGK                  | 31  | 5864  | 0.32 | 0.27 | 82  |
| 10 F56F3.5                                 | EWYDIK                     | 20  | 5024  | 0.43 | 0.07 | 17  |
| 7 F56F3.5                                  | LIAEDVQGK                  | 34  | 2458  | 0.43 | 0.14 | 33  |
| 22 F56F3.5                                 | WHTLIEANTAVK               | 46  | 2574  | 0.45 | 0.09 | 21  |
| 22 F56F3.5                                 | EWYDIK                     | 21  | 3377  | 0.46 | 0.12 | 27  |
| 22 F56F3.5                                 | EWYDIK                     | 15  | 2447  | 0.46 | 0.24 | 51  |
| 22 F56F3.5                                 | WHTLIEANTAVK               | 39  | 3427  | 0.47 | 0.21 | 45  |
| 22 F56F3.5                                 | VDLGRHLHDLHGDSITVGADGEK    | 35  | 6428  | 0.48 | 0.13 | 27  |
| 22 F56F3.5                                 | LIAEDVQGK                  | 40  | 3980  | 0.49 | 0.15 | 31  |
| 1 F56F3.5                                  | LIAEDVQGK                  | 60  | 3334  | 0.51 | 0.09 | 18  |
| 22 F56F3.5                                 | LIAEDVQGK                  | 36  | 3604  | 0.52 | 0.18 | 34  |
| 1 F56F3.5                                  | LYPLQEVYIRK                | 19  | 1250  | 0.52 | 0.06 | 12  |
| 10 F56F3.5                                 | LYPLQEVYIRK                | 36  | 4739  | 0.52 | 0.18 | 34  |
| 1 F56F3.5                                  | AVDPFSRK                   | 34  | 12622 | 0.53 | 0.36 | 68  |
| 1 F56F3.5                                  | LIAEDVQGK                  | 59  | 3897  | 0.53 | 0.13 | 25  |
| 22 F56F3.5                                 | VDLGRHLHDLHGDSITVGADGEK    | 38  | 7432  | 0.54 | 0.22 | 40  |
| 1 F56F3.5                                  | AVDPFSRK                   | 21  | 11640 | 0.55 | 0.14 | 26  |
| 10 F56F3.5                                 | LIAEDVQGK                  | 16  | 3120  | 0.55 | 0.27 | 49  |
| 1 F56F3.5                                  | APNMFNTRQVGK               | 25  | 5148  | 0.57 | 0.12 | 21  |
| 10 F56F3.5                                 | LYPLQEVYIRK                | 24  | 3780  | 0.58 | 0.16 | 27  |
| 10 F56F3.5                                 | APNMFNTRQVGK               | 38  | 22699 | 0.59 | 0.12 | 21  |
| 1 F56F3.5                                  | VDLGRHLHDLHGDSITVGADGEK    | 30  | 23383 | 0.59 | 0.10 | 16  |
| 10 F56F3.5                                 | AVDPFSRK                   | 23  | 73137 | 0.60 | 0.11 | 18  |
| 22 F56F3.5                                 | NVLTNFHAMSMTHDK            | 13  | 6170  | 0.61 | 0.15 | 25  |
| 1 F56F3.5                                  | APNMFNTRQVGK               | 42  | 7906  | 0.61 | 0.24 | 39  |
| 1 F56F3.5                                  | AVDPFSRK                   | 25  | 55511 | 0.61 | 0.08 | 13  |
| 10 F56F3.5                                 | VDLGRHLHDLHGDSITVGADGEK    | 16  | 8803  | 0.62 | 0.22 | 35  |
| 22 F56F3.5                                 | NVLTNFHAMSMTHDK            | 16  | 10119 | 0.62 | 0.05 | 8   |
| 22 F56F3.5                                 | LYPLQEVYIRK                | 26  | 3853  | 0.63 | 0.05 | 8   |

|            |                         |    |       |      |      |    |
|------------|-------------------------|----|-------|------|------|----|
| 1 F56F3.5  | TLINRTQGTK              | 16 | 933   | 0.64 | 0.09 | 14 |
| 1 F56F3.5  | AVDPFSRK                | 20 | 34847 | 0.64 | 0.04 | 7  |
| 7 F56F3.5  | LYPLQEVYIRK             | 28 | 5841  | 0.66 | 0.23 | 35 |
| 10 F56F3.5 | LIAEDVQGK               | 19 | 2126  | 0.67 | 0.17 | 25 |
| 22 F56F3.5 | LIAEDVQGK               | 32 | 2391  | 0.67 | 0.26 | 38 |
| 1 F56F3.5  | VDLGRHLHDLHGDSITVGADGEK | 16 | 26676 | 0.68 | 0.12 | 18 |
| 1 F56F3.5  | APNMFNTRQVGK            | 20 | 5576  | 0.68 | 0.14 | 21 |
| 1 F56F3.5  | LYPLQEVYIRK             | 10 | 2084  | 0.69 | 0.14 | 20 |
| 10 F56F3.5 | VDLGRHLHDLHGDSITVGADGEK | 16 | 62777 | 0.70 | 0.09 | 13 |
| 7 F56F3.5  | LIAEDVQGK               | 55 | 2659  | 0.70 | 0.14 | 21 |
| 7 F56F3.5  | LYPLQEVYIRK             | 10 | 3309  | 0.70 | 0.12 | 18 |
| 22 F56F3.5 | LYPLQEVYIRK             | 28 | 6426  | 0.71 | 0.11 | 16 |
| 1 F56F3.5  | TLINRTQGTK              | 12 | 1341  | 0.72 | 0.20 | 28 |
| 1 F56F3.5  | LYPLQEVYIRK             | 20 | 1770  | 0.72 | 0.07 | 9  |
| 22 F56F3.5 | EWYDIK                  | 14 | 1556  | 0.75 | 0.15 | 21 |
| 10 F56F3.5 | VDLGRHLHDLHGDSITVGADGEK | 29 | 13292 | 0.76 | 0.07 | 10 |
| 7 F56F3.5  | LYPLQEVYIRK             | 10 | 4074  | 0.79 | 0.35 | 44 |
| 1 F56F3.5  | GRVFEVSLGDLNNSEADFRK    | 22 | 2540  | 0.80 | 0.13 | 16 |
| 22 F56F3.5 | VDLGRHLHDLHGDSITVGADGEK | 12 | 16972 | 0.81 | 0.14 | 17 |
| 22 F56F3.5 | LYPLQEVYIRK             | 35 | 2762  | 0.81 | 0.34 | 42 |
| 22 F56F3.5 | WHTLIEANTAVK            | 36 | 2746  | 0.82 | 0.16 | 20 |
| 10 F56F3.5 | GRVFEVSLGDLNNSEADFRK    | 34 | 6094  | 0.82 | 0.13 | 16 |
| 1 F56F3.5  | TLINRTQGTK              | 25 | 1290  | 0.82 | 0.18 | 22 |
| 1 F56F3.5  | TLINRTQGTK              | 20 | 620   | 0.82 | 0.11 | 13 |
| 10 F56F3.5 | GRVFEVSLGDLNNSEADFRK    | 32 | 3400  | 0.83 | 0.14 | 17 |
| 10 F56F3.5 | GRVFEVSLGDLNNSEADFRK    | 60 | 9882  | 0.84 | 0.09 | 10 |
| 22 F56F3.5 | GRVFEVSLGDLNNSEADFRK    | 16 | 4337  | 0.84 | 0.21 | 25 |
| 10 F56F3.5 | APNMFNTRQVGK            | 46 | 29860 | 0.85 | 0.07 | 8  |
| 7 F56F3.5  | APNMFNTRQVGK            | 10 | 2462  | 0.86 | 0.15 | 18 |
| 10 F56F3.5 | GRVFEVSLGDLNNSEADFRK    | 43 | 5947  | 0.87 | 0.13 | 15 |
| 1 F56F3.5  | VDLGRHLHDLHGDSITVGADGEK | 11 | 19128 | 0.89 | 0.17 | 19 |
| 10 F56F3.5 | VDLGRHLHDLHGDSITVGADGEK | 10 | 64343 | 0.89 | 0.21 | 23 |
| 22 F56F3.5 | LYPLQEVYIRK             | 36 | 4090  | 0.89 | 0.11 | 12 |
| 7 F56F3.5  | LIAEDVQGK               | 41 | 1962  | 0.91 | 0.11 | 12 |
| 22 F56F3.5 | WHTLIEANTAVK            | 26 | 2287  | 0.92 | 0.10 | 11 |
| 10 F56F3.5 | GRVFEVSLGDLNNSEADFRK    | 47 | 15607 | 0.93 | 0.13 | 14 |
| 10 F56F3.5 | IRSEMIGCIEK             | 17 | 2327  | 0.93 | 0.16 | 17 |
| 10 F56F3.5 | LYPLQEVYIRK             | 31 | 6020  | 0.97 | 0.08 | 8  |
| 10 F56F3.5 | LYPLQEVYIRK             | 20 | 2270  | 0.97 | 0.15 | 16 |
| 10 F56F3.5 | GRVFEVSLGDLNNSEADFRK    | 18 | 7321  | 0.97 | 0.10 | 10 |
| 22 F56F3.5 | AVDPFSRK                | 33 | 86107 | 0.99 | 0.14 | 14 |
| 7 F56F3.5  | LYPLQEVYIRK             | 30 | 3311  | 1.01 | 0.14 | 13 |
| 22 F56F3.5 | GRVFEVSLGDLNNSEADFRK    | 40 | 9517  | 1.01 | 0.15 | 15 |
| 1 F56F3.5  | TLINRTQGTK              | 22 | 2014  | 1.02 | 0.08 | 8  |
| 1 F56F3.5  | GRVFEVSLGDLNNSEADFRK    | 22 | 2062  | 1.04 | 0.13 | 13 |
| 10 F56F3.5 | LYPLQEVYIRK             | 14 | 3085  | 1.06 | 0.25 | 24 |
| 10 F56F3.5 | GRVFEVSLGDLNNSEADFRK    | 47 | 8336  | 1.07 | 0.11 | 10 |
| 10 F56F3.5 | APNMFNTRQVGK            | 13 | 2950  | 1.08 | 0.13 | 12 |
| 10 F56F3.5 | AVDPFSRK                | 24 | 27797 | 1.09 | 0.13 | 12 |
| 10 F56F3.5 | LYPLQEVYIRK             | 10 | 4842  | 1.10 | 0.10 | 9  |
| 1 F56F3.5  | AVDPFSRK                | 16 | 2750  | 1.11 | 0.14 | 12 |
| 1 F56F3.5  | TLINRTQGTK              | 11 | 1032  | 1.12 | 0.18 | 16 |
| 10 F56F3.5 | WHTLIEANTAVK            | 32 | 1478  | 1.14 | 0.12 | 11 |
| 7 F56F3.5  | NVLTNFHAMSMTHDK         | 10 | 6813  | 1.14 | 0.18 | 16 |
| 7 F56F3.5  | APNMFNTRQVGK            | 20 | 2911  | 1.15 | 0.15 | 13 |
| 7 F56F3.5  | AVDPFSRK                | 41 | 49194 | 1.15 | 0.04 | 3  |
| 7 F56F3.5  | GRVFEVSLGDLNNSEADFRK    | 14 | 8002  | 1.16 | 0.09 | 8  |
| 22 F56F3.5 | LYPLQEVYIRK             | 18 | 2266  | 1.18 | 0.10 | 8  |
| 10 F56F3.5 | TLINRTQGTK              | 33 | 27879 | 1.20 | 0.11 | 10 |
| 7 F56F3.5  | TLINRTQGTK              | 17 | 8095  | 1.21 | 0.07 | 6  |
| 22 F56F3.5 | LYPLQEVYIRK             | 29 | 6407  | 1.23 | 0.07 | 6  |
| 7 F56F3.5  | LYPLQEVYIRK             | 13 | 5019  | 1.23 | 0.10 | 8  |
| 10 F56F3.5 | APNMFNTRQVGK            | 39 | 17172 | 1.24 | 0.17 | 13 |
| 10 F56F3.5 | TLINRTQGTK              | 33 | 33299 | 1.24 | 0.10 | 8  |
| 10 F56F3.5 | LYPLQEVYIRK             | 13 | 4790  | 1.25 | 0.18 | 15 |
| 7 F56F3.5  | LYPLQEVYIRK             | 41 | 4362  | 1.29 | 0.12 | 10 |
| 1 F56F3.5  | NVLTNFHAMSMTHDK         | 11 | 5288  | 1.32 | 0.04 | 3  |
| 22 F56F3.5 | WHTLIEANTAVK            | 14 | 1380  | 1.34 | 0.24 | 18 |
| 22 F56F3.5 | APNMFNTRQVGK            | 33 | 3876  | 1.34 | 0.18 | 13 |
| 22 F56F3.5 | GRVFEVSLGDLNNSEADFRK    | 39 | 7432  | 1.34 | 0.12 | 9  |
| 22 F56F3.5 | APNMFNTRQVGK            | 15 | 1411  | 1.35 | 0.14 | 10 |
| 7 F56F3.5  | AVDPFSRK                | 13 | 3895  | 1.36 | 0.07 | 5  |
| 10 F56F3.5 | APNMFNTRQVGK            | 40 | 5402  | 1.36 | 0.16 | 12 |
| 22 F56F3.5 | LYPLQEVYIRK             | 29 | 4706  | 1.36 | 0.09 | 7  |
| 1 F56F3.5  | TLINRTQGTK              | 25 | 1917  | 1.38 | 0.09 | 7  |
| 22 F56F3.5 | GRVFEVSLGDLNNSEADFRK    | 43 | 9603  | 1.38 | 0.18 | 13 |
| 22 F56F3.5 | TLINRTQGTK              | 18 | 1379  | 1.39 | 0.13 | 10 |
| 10 F56F3.5 | AVDPFSRK                | 20 | 9897  | 1.39 | 0.05 | 3  |
| 1 F56F3.5  | LYPLQEVYIRK             | 19 | 3957  | 1.39 | 0.11 | 8  |
| 22 F56F3.5 | TLINRTQGTK              | 11 | 8898  | 1.39 | 0.10 | 7  |
| 7 F56F3.5  | TLINRTQGTK              | 29 | 5635  | 1.40 | 0.09 | 7  |
| 10 F56F3.5 | APNMFNTRQVGK            | 11 | 1378  | 1.41 | 0.07 | 5  |
| 22 F56F3.5 | TLINRTQGTK              | 23 | 1768  | 1.42 | 0.05 | 4  |
| 1 F56F3.5  | TLINRTQGTK              | 25 | 1000  | 1.42 | 0.09 | 6  |
| 22 F56F3.5 | APNMFNTRQVGK            | 32 | 2569  | 1.43 | 0.19 | 13 |
| 10 F56F3.5 | WHTLIEANTAVK            | 31 | 1709  | 1.43 | 0.07 | 5  |
| 10 F56F3.5 | AVDPFSRK                | 22 | 18991 | 1.43 | 0.13 | 9  |
| 10 F56F3.5 | NVLTNFHAMSMTHDK         | 25 | 26592 | 1.44 | 0.14 | 9  |
| 1 F56F3.5  | WHTLIEANTAVK            | 21 | 1707  | 1.45 | 0.26 | 18 |
| 10 F56F3.5 | LYPLQEVYIRK             | 31 | 15282 | 1.45 | 0.18 | 13 |
| 22 F56F3.5 | APNMFNTRQVGK            | 16 | 1968  | 1.50 | 0.19 | 13 |
| 22 F56F3.5 | APNMFNTRQVGK            | 11 | 985   | 1.51 | 0.22 | 15 |
| 10 F56F3.5 | LYPLQEVYIRK             | 15 | 9358  | 1.52 | 0.17 | 11 |
| 10 F56F3.5 | TLINRTQGTK              | 21 | 1632  | 1.52 | 0.05 | 3  |
| 7 F56F3.5  | LYPLQEVYIRK             | 25 | 6167  | 1.53 | 0.14 | 9  |
| 10 F56F3.5 | WHTLIEANTAVK            | 41 | 5112  | 1.55 | 0.11 | 7  |
| 22 F56F3.5 | GRVFEVSLGDLNNSEADFRK    | 27 | 6240  | 1.58 | 0.17 | 11 |
| 10 F56F3.5 | APNMFNTRQVGK            | 18 | 4263  | 1.59 | 0.07 | 5  |
| 10 F56F3.5 | APNMFNTRQVGK            | 30 | 4028  | 1.62 | 0.15 | 9  |
| 7 F56F3.5  | LYPLQEVYIRK             | 35 | 2729  | 1.64 | 0.14 | 9  |
| 10 F56F3.5 | NVLTNFHAMSMTHDK         | 29 | 11814 | 1.65 | 0.13 | 8  |

|                        |                      |    |       |       |      |     |
|------------------------|----------------------|----|-------|-------|------|-----|
| 10 F56F3.5             | IRSEMIGCIEK          | 10 | 4060  | 1.65  | 0.32 | 19  |
| 1 F56F3.5              | GRVFEVSLGDLNNSEADFRK | 45 | 13669 | 1.66  | 0.15 | 9   |
| 7 F56F3.5              | GRVFEVSLGDLNNSEADFRK | 49 | 4534  | 1.66  | 0.13 | 8   |
| 22 F56F3.5             | NVLTNFHAMSMTHDK      | 14 | 7083  | 1.66  | 0.20 | 12  |
| 22 F56F3.5             | TLINRTQGTK           | 12 | 547   | 1.67  | 0.09 | 5   |
| 22 F56F3.5             | AVDPFSRK             | 17 | 7674  | 1.76  | 0.12 | 7   |
| 22 F56F3.5             | APNMFNTRQVGK         | 21 | 2893  | 1.79  | 0.15 | 8   |
| 22 F56F3.5             | TLINRTQGTK           | 25 | 2610  | 1.80  | 0.05 | 3   |
| 10 F56F3.5             | TLINRTQGTK           | 40 | 2744  | 1.83  | 0.07 | 4   |
| 22 F56F3.5             | TLINRTQGTK           | 11 | 1314  | 1.85  | 0.15 | 8   |
| 10 F56F3.5             | NVLTNFHAMSMTHDK      | 14 | 16467 | 1.86  | 0.04 | 2   |
| 7 F56F3.5              | TLINRTQGTK           | 14 | 649   | 1.86  | 0.16 | 9   |
| 10 F56F3.5             | GRVFEVSLGDLNNSEADFRK | 36 | 5130  | 1.88  | 0.10 | 6   |
| 10 F56F3.5             | WHTLIEANTAVK         | 54 | 2488  | 1.88  | 0.06 | 3   |
| 1 F56F3.5              | TLINRTQGTK           | 33 | 1763  | 1.89  | 0.08 | 4   |
| 10 F56F3.5             | TLINRTQGTK           | 24 | 2598  | 1.90  | 0.16 | 9   |
| 1 F56F3.5              | GRVFEVSLGDLNNSEADFRK | 36 | 9129  | 1.95  | 0.12 | 6   |
| 7 F56F3.5              | GRVFEVSLGDLNNSEADFRK | 10 | 3483  | 1.95  | 0.16 | 8   |
| 10 F56F3.5             | TLINRTQGTK           | 27 | 3778  | 2.01  | 0.09 | 4   |
| 10 F56F3.5             | APNMFNTRQVGK         | 24 | 12064 | 2.33  | 0.14 | 6   |
| 10 F56F3.5             | TLINRTQGTK           | 22 | 2794  | 2.42  | 0.39 | 16  |
| 10 F56F3.5             | NVLTNFHAMSMTHDK      | 16 | 7661  | 2.59  | 0.10 | 4   |
| 22 F56F3.5             | GRVFEVSLGDLNNSEADFRK | 31 | 3733  | 2.61  | 0.12 | 5   |
| 10 F56F3.5             | GRVFEVSLGDLNNSEADFRK | 41 | 3193  | 2.70  | 0.18 | 7   |
| 7 F56F3.5              | TLINRTQGTK           | 14 | 539   | 2.75  | 0.15 | 5   |
| 22 F56F3.5             | APNMFNTRQVGK         | 23 | 3544  | 2.78  | 0.19 | 7   |
| 22 F56F3.5             | TLINRTQGTK           | 36 | 954   | 3.06  | 0.13 | 4   |
| 7 F56F3.5              | APNMFNTRQVGK         | 38 | 5640  | 3.07  | 0.13 | 4   |
| 10 F56F3.5             | GRVFEVSLGDLNNSEADFRK | 29 | 10395 | 3.30  | 0.24 | 7   |
| 22 F56F3.5             | IRSEMIGCIEK          | 11 | 887   | 3.67  | 0.20 | 6   |
| 22 F56F3.5             | GRVFEVSLGDLNNSEADFRK | 11 | 2088  | 3.88  | 0.18 | 5   |
| 7 F56F3.5              | APNMFNTRQVGK         | 35 | 3866  | 4.18  | 0.20 | 5   |
| 22 F56H1.4             | LVRDAFALAK           | 16 | 1859  | 0.62  | 0.14 | 23  |
| 1 F56H1.4              | DSYLILEK             | 22 | 722   | 0.80  | 0.12 | 15  |
| 1 F56H1.4              | LPAEYDSRVK           | 13 | 2479  | 0.90  | 0.04 | 4   |
| 7 F56H1.4              | LVRDAFALAK           | 10 | 1458  | 0.93  | 0.10 | 10  |
| 1 F56H1.4              | DRFVNLGIHPPK         | 12 | 1337  | 1.27  | 0.10 | 8   |
| 22 F56H1.4             | DRFVNLGIHPPK         | 13 | 2723  | 1.40  | 0.31 | 22  |
| 7 F56H1.4              | LVRDAFALAK           | 13 | 1586  | 1.43  | 0.09 | 7   |
| 10 F56H1.4             | LVRDAFALAK           | 14 | 1075  | 1.63  | 0.15 | 9   |
| 7 F56H1.4              | DRFVNLGIHPPK         | 11 | 1373  | 1.78  | 0.10 | 6   |
| 1 F57B10.11            | FLQGADDVSLSTLNFK     | 26 | 289   | 0.89  | 0.42 | 47  |
| 10 F57B10.3b;F57B10.3a | NVLAEWLAEQK          | 31 | 929   | 0.57  | 0.13 | 23  |
| 10 F57B10.3b;F57B10.3a | NVLAEWLAEQK          | 51 | 1867  | 0.58  | 0.16 | 28  |
| 10 F57B10.3b;F57B10.3a | AEFPFK               | 21 | 3228  | 0.63  | 0.34 | 54  |
| 10 F57B10.3b;F57B10.3a | NVLAEWLAEQK          | 31 | 1205  | 0.71  | 0.14 | 20  |
| 1 F57B10.3b;F57B10.3a  | NVLAEWLAEQK          | 62 | 1161  | 0.79  | 0.16 | 20  |
| 22 F57B10.3b;F57B10.3a | NVLAEWLAEQK          | 24 | 885   | 0.82  | 0.34 | 42  |
| 22 F57B10.3b;F57B10.3a | NVLAEWLAEQK          | 36 | 923   | 0.87  | 0.15 | 17  |
| 7 F57B10.3b;F57B10.3a  | NVLAEWLAEQK          | 48 | 1795  | 0.88  | 0.07 | 8   |
| 22 F57B10.3b;F57B10.3a | NVLAEWLAEQK          | 22 | 523   | 0.98  | 0.14 | 14  |
| 22 F57B10.3b;F57B10.3a | NVLAEWLAEQK          | 37 | 984   | 0.99  | 0.21 | 21  |
| 7 F57B10.3b;F57B10.3a  | NVLAEWLAEQK          | 52 | 1422  | 1.11  | 0.14 | 12  |
| 22 F57B10.3b;F57B10.3a | AEFPFK               | 12 | 1080  | 1.29  | 0.34 | 26  |
| 22 F57B10.3b;F57B10.3a | NVLAEWLAEQK          | 27 | 757   | 1.45  | 0.18 | 12  |
| 10 F57B10.3b;F57B10.3a | HGYSLMVTADHGNAEK     | 28 | 9260  | 1.61  | 0.06 | 3   |
| 10 F57B10.3b;F57B10.3a | HGYSLMVTADHGNAEK     | 33 | 10830 | 1.62  | 0.17 | 10  |
| 22 F57B10.3b;F57B10.3a | HGYSLMVTADHGNAEK     | 28 | 6453  | 1.74  | 0.11 | 6   |
| 22 F57B10.3b;F57B10.3a | HGYSLMVTADHGNAEK     | 23 | 5095  | 1.82  | 0.11 | 6   |
| 10 F57B10.3b;F57B10.3a | HGYSLMVTADHGNAEK     | 36 | 7252  | 1.87  | 0.05 | 3   |
| 10 F57B10.3b;F57B10.3a | HGYSLMVTADHGNAEK     | 22 | 7172  | 1.89  | 0.09 | 5   |
| 7 F57B10.3b;F57B10.3a  | HGYSLMVTADHGNAEK     | 10 | 3511  | 3.46  | 0.35 | 10  |
| 1 F57B9.10a;F57B9.10b  | LSQMILDQK            | 16 | 345   | 0.44  | 0.10 | 24  |
| 22 F57B9.10a;F57B9.10b | LSQMILDQK            | 49 | 6842  | 0.49  | 0.14 | 29  |
| 22 F57B9.10a;F57B9.10b | LSQMILDQK            | 46 | 6647  | 0.59  | 0.11 | 19  |
| 22 F57B9.10a;F57B9.10b | VMLDLPDEVNSLLSAK     | 46 | 1344  | 0.63  | 0.22 | 36  |
| 22 F57B9.10a;F57B9.10b | LSQMILDQK            | 36 | 1942  | 0.96  | 0.15 | 16  |
| 10 F57B9.6a;F57B9.6b   | DVIAQAQSGTGK         | 39 | 4713  | 0.17  | 0.66 | 386 |
| 10 F57B9.6a;F57B9.6b   | GVAINFVTENDARQLK     | 34 | 6443  | 0.43  | 0.36 | 84  |
| 22 F57B9.6a;F57B9.6b   | DVIAQAQSGTGK         | 70 | 8427  | 0.59  | 0.17 | 29  |
| 10 F57B9.6a;F57B9.6b   | DVIAQAQSGTGK         | 29 | 3897  | 0.78  | 0.56 | 72  |
| 7 F57B9.6a;F57B9.6b    | RAIVPCTTGK           | 13 | 1174  | 0.88  | 0.34 | 38  |
| 22 F57B9.6a;F57B9.6b   | GVAINFVTENDARQLK     | 38 | 5516  | 1.06  | 0.14 | 13  |
| 10 F57B9.6a;F57B9.6b   | DVIAQAQSGTGK         | 67 | 4666  | 1.12  | 0.08 | 7   |
| 10 F57B9.6a;F57B9.6b   | DVIAQAQSGTGK         | 24 | 4526  | 1.14  | 0.40 | 36  |
| 10 F57B9.6a;F57B9.6b   | DVIAQAQSGTGK         | 67 | 5449  | 1.15  | 0.12 | 11  |
| 10 F57B9.6a;F57B9.6b   | GVAINFVTENDARQLK     | 36 | 11904 | 1.21  | 0.16 | 13  |
| 10 F57B9.6a;F57B9.6b   | GVAINFVTENDARQLK     | 25 | 12066 | 1.28  | 0.13 | 10  |
| 10 F57B9.6a;F57B9.6b   | GVAINFVTENDARQLK     | 36 | 2449  | 1.36  | 0.08 | 6   |
| 22 F57B9.6a;F57B9.6b   | GVAINFVTENDARQLK     | 24 | 2138  | 1.39  | 0.19 | 14  |
| 7 F57B9.6a;F57B9.6b    | GVAINFVTENDARQLK     | 52 | 2681  | 1.50  | 0.19 | 13  |
| 7 F57B9.6a;F57B9.6b    | GVAINFVTENDARQLK     | 55 | 3542  | 1.61  | 0.14 | 9   |
| 22 F57F5.1             | GYVTGGSYQDK          | 19 | 5444  | 1.59  | 0.12 | 8   |
| 1 F58B3.5a             | QFDGVHLK             | 23 | 3549  | 0.40  | 0.12 | 29  |
| 1 F58B3.5a             | QFDGVHLK             | 26 | 6067  | 0.79  | 0.20 | 25  |
| 7 F58B3.5a;F58B3.5b    | QFDGVHLK             | 27 | 6061  | 0.65  | 0.18 | 28  |
| 22 F58B4.5             | WVGASENEELPEK        | 25 | 1644  | 0.55  | 0.31 | 57  |
| 22 F58B4.5             | MIGLLEDVITTHESNIK    | 69 | 1586  | 0.78  | 0.12 | 15  |
| 22 F58B4.5             | SIERMNVLLK           | 11 | 1061  | 0.79  | 0.22 | 27  |
| 22 F58B4.5             | MIGLLEDVITTHESNIK    | 78 | 1558  | 0.97  | 0.16 | 17  |
| 22 F58B4.5             | MIGLLEDVITTHESNIK    | 17 | 1614  | 1.06  | 0.19 | 18  |
| 22 F58B4.5             | MIGLLEDVITTHESNIK    | 15 | 1325  | 1.11  | 0.14 | 13  |
| 10 F58B4.5             | MIGLLEDVITTHESNIK    | 78 | 1902  | 18.56 | 0.35 | 2   |
| 1 F58D5.1a;F58D5.1b    | FIFTEIK              | 10 | 420   | 1.01  | 0.11 | 11  |
| 1 F58D5.1a;F58D5.1b    | VLYIRNIK             | 17 | 674   | 1.27  | 0.15 | 11  |
| 22 F58G1.1             | RLTLENVINK           | 11 | 570   | 2.62  | 0.05 | 2   |
| 1 F58G1.4              | TNGPIDVTPFVQK        | 30 | 2411  | 0.64  | 0.15 | 24  |
| 22 F58G1.4             | EPIDIGALPIQLGGDWK    | 39 | 1311  | 0.70  | 0.07 | 10  |
| 1 F58G1.4              | TNGPIDVTPFVQK        | 48 | 4219  | 0.76  | 0.09 | 12  |
| 1 F58G1.4              | TNGPIDVTPFVQK        | 44 | 3018  | 0.84  | 0.14 | 17  |
| 22 F58G1.4             | TLAGVQLGNKG          | 75 | 12290 | 0.87  | 0.09 | 10  |

|             |                           |     |       |      |      |     |
|-------------|---------------------------|-----|-------|------|------|-----|
| 22 F58G1.4  | TLAGVQLGNGK               | 86  | 14840 | 0.88 | 0.06 | 6   |
| 10 F58G1.4  | TNGPIDVTPFVQK             | 41  | 3736  | 0.93 | 0.08 | 8   |
| 7 F58G1.4   | TNGPIDVTPFVQK             | 25  | 3583  | 0.96 | 0.13 | 14  |
| 7 F58G1.4   | VGARIVQNGK                | 24  | 4599  | 0.99 | 0.15 | 15  |
| 10 F58G1.4  | TNGPIDVTPFVQK             | 24  | 5650  | 1.03 | 0.09 | 9   |
| 7 F58G1.4   | TNGPIDVTPFVQK             | 32  | 3323  | 1.07 | 0.14 | 13  |
| 22 F58G1.4  | TNGPIDVTPFVQK             | 37  | 5395  | 1.10 | 0.11 | 10  |
| 22 F58G1.4  | TNGPIDVTPFVQK             | 29  | 3109  | 1.13 | 0.10 | 8   |
| 1 F58G1.4   | VGARIVQNGK                | 22  | 4733  | 1.20 | 0.11 | 9   |
| 10 F58G1.4  | TWLNIIYSEEGK              | 64  | 2470  | 1.26 | 0.13 | 10  |
| 7 F58G1.4   | VGARIVQNGK                | 20  | 4417  | 1.27 | 0.08 | 7   |
| 7 F58G1.4   | TLAGVQLGNGK               | 63  | 18838 | 1.28 | 0.08 | 6   |
| 10 F58G1.4  | TLAGVQLGNGK               | 86  | 33724 | 1.30 | 0.08 | 7   |
| 22 F58G1.4  | TWLNIIYSEEGK              | 45  | 1916  | 1.30 | 0.16 | 12  |
| 1 F58G1.4   | VGARIVQNGK                | 23  | 5135  | 1.34 | 0.09 | 7   |
| 7 F58G1.4   | TLAGVQLGNGK               | 68  | 13794 | 1.35 | 0.04 | 3   |
| 22 F58G1.4  | TWLNIIYSEEGK              | 50  | 1440  | 1.41 | 0.06 | 5   |
| 10 F58G1.4  | TWLNIIYSEEGK              | 46  | 1795  | 1.43 | 0.11 | 8   |
| 1 F58G1.4   | TLAGVQLGNGK               | 18  | 3218  | 1.44 | 0.21 | 14  |
| 1 F58G1.4   | TWLNIIYSEEGK              | 54  | 950   | 1.59 | 0.21 | 13  |
| 10 F58G1.4  | VGARIVQNGK                | 13  | 4318  | 1.72 | 0.13 | 7   |
| 10 F58G1.4  | VGARIVQNGK                | 16  | 5606  | 1.75 | 0.20 | 11  |
| 1 F58G1.4   | TLAGVQLGNGK               | 15  | 4064  | 1.91 | 0.22 | 11  |
| 1 F58G1.4   | TWLNIIYSEEGK              | 18  | 658   | 2.06 | 0.20 | 10  |
| 22 F58G1.4  | TLAGVQLGNGK               | 44  | 10804 | 2.06 | 0.08 | 4   |
| 7 F58G1.4   | GKPQFRLPGHFK              | 10  | 5546  | 2.07 | 0.10 | 5   |
| 22 F58G1.4  | TLAGVQLGNGK               | 34  | 6385  | 2.11 | 0.06 | 3   |
| 22 F58H1.3a | LLFANSIEGDMTK             | 55  | 1149  | 0.70 | 0.13 | 18  |
| 10 F58H1.3a | GHVYPDVLPLVK              | 24  | 10554 | 1.27 | 0.08 | 6   |
| 22 F58H1.3a | GHVYPDVLPLVK              | 26  | 6883  | 1.31 | 0.22 | 17  |
| 1 F58H1.3a  | GHVYPDVLPLVK              | 11  | 4953  | 1.48 | 0.09 | 6   |
| 10 F58H1.3a | GHVYPDVLPLVK              | 16  | 8572  | 1.61 | 0.14 | 9   |
| 10 F59A2.3  | TLVAYATHYEHSQYVGLLDK      | 14  | 1397  | 0.37 | 0.12 | 32  |
| 1 F59A2.3   | DAEVRCLK                  | 17  | 20255 | 0.43 | 0.18 | 40  |
| 1 F59A2.3   | TLVAYATHYEHSQYVGLLDK      | 14  | 1212  | 0.44 | 0.29 | 66  |
| 22 F59A2.3  | TLVAYATHYEHSQYVGLLDK      | 16  | 2704  | 0.50 | 0.17 | 34  |
| 7 F59A2.3   | TLVAYATHYEHSQYVGLLDK      | 47  | 6433  | 0.51 | 0.18 | 35  |
| 1 F59A2.3   | NGNEDVPSEVYASSGK          | 55  | 3036  | 0.58 | 0.09 | 16  |
| 22 F59A2.3  | TLVAYATHYEHSQYVGLLDK      | 38  | 7704  | 0.60 | 0.17 | 28  |
| 1 F59A2.3   | TLVAYATHYEHSQYVGLLDK      | 26  | 1704  | 0.61 | 0.23 | 37  |
| 22 F59A2.3  | TLVAYATHYEHSQYVGLLDK      | 29  | 2447  | 0.62 | 0.24 | 40  |
| 7 F59A2.3   | TLVAYATHYEHSQYVGLLDK      | 18  | 7331  | 0.62 | 0.14 | 23  |
| 22 F59A2.3  | NGNEDVPSEVYASSGK          | 38  | 4655  | 0.64 | 0.14 | 21  |
| 1 F59A2.3   | NGNEDVPSEVYASSGK          | 47  | 2959  | 0.66 | 0.05 | 7   |
| 10 F59A2.3  | TLVAYATHYEHSQYVGLLDK      | 35  | 3576  | 0.66 | 0.20 | 30  |
| 22 F59A2.3  | NGNEDVPSEVYASSGK          | 63  | 5623  | 0.67 | 0.24 | 35  |
| 22 F59A2.3  | TLVAYATHYEHSQYVGLLDK      | 28  | 5721  | 0.68 | 0.21 | 31  |
| 10 F59A2.3  | NGNEDVPSEVYASSGK          | 47  | 6083  | 0.73 | 0.11 | 15  |
| 10 F59A2.3  | TLVAYATHYEHSQYVGLLDK      | 36  | 2998  | 0.75 | 0.23 | 31  |
| 1 F59A2.3   | NGNEDVPSEVYASSGK          | 18  | 3283  | 0.78 | 0.13 | 16  |
| 10 F59A2.3  | NGNEDVPSEVYASSGK          | 64  | 9338  | 0.83 | 0.18 | 22  |
| 7 F59B8.2   | FPLYLSTK                  | 17  | 2270  | 0.34 | 0.37 | 109 |
| 22 F59B8.2  | LAENLAK                   | 26  | 14310 | 0.43 | 0.07 | 16  |
| 22 F59B8.2  | FPLYLSTK                  | 48  | 5179  | 0.43 | 0.30 | 68  |
| 22 F59B8.2  | FPLYLSTK                  | 50  | 6199  | 0.45 | 0.48 | 108 |
| 22 F59B8.2  | FPLYLSTK                  | 79  | 8176  | 0.47 | 0.20 | 43  |
| 22 F59B8.2  | DIFAEIYPEYAEFK            | 25  | 1954  | 0.48 | 0.08 | 17  |
| 22 F59B8.2  | LAENLAK                   | 22  | 8299  | 0.48 | 0.12 | 25  |
| 22 F59B8.2  | GPGVSLSMYNTDDSIIRDFAHASFK | 34  | 10388 | 0.48 | 0.19 | 38  |
| 22 F59B8.2  | DIFAEIYPEYAEFK            | 48  | 2070  | 0.50 | 0.16 | 32  |
| 1 F59B8.2   | FPLYLSTK                  | 23  | 1406  | 0.50 | 0.13 | 25  |
| 7 F59B8.2   | FPLYLSTK                  | 17  | 1848  | 0.52 | 0.18 | 35  |
| 7 F59B8.2   | FPLYLSTK                  | 13  | 1682  | 0.57 | 0.09 | 15  |
| 7 F59B8.2   | FPLYLSTK                  | 18  | 1740  | 0.58 | 0.08 | 13  |
| 22 F59B8.2  | FPLYLSTK                  | 64  | 9194  | 0.60 | 0.12 | 19  |
| 10 F59B8.2  | GGNASAVTRTDYLNTEFLDK      | 47  | 4136  | 0.60 | 0.12 | 20  |
| 22 F59B8.2  | GPGVSLSMYNTDDSIIRDFAHASFK | 28  | 7783  | 0.64 | 0.39 | 60  |
| 10 F59B8.2  | FPLYLSTK                  | 63  | 3219  | 0.65 | 0.13 | 21  |
| 7 F59B8.2   | FPLYLSTK                  | 16  | 1636  | 0.68 | 0.37 | 54  |
| 22 F59B8.2  | GGNASAVTRTDYLNTEFLDK      | 55  | 4371  | 0.68 | 0.12 | 17  |
| 10 F59B8.2  | FPLYLSTK                  | 46  | 3024  | 0.71 | 0.16 | 22  |
| 10 F59B8.2  | GGNASAVTRTDYLNTEFLDK      | 45  | 3087  | 0.74 | 0.13 | 17  |
| 22 F59B8.2  | GGNASAVTRTDYLNTEFLDK      | 56  | 5985  | 0.78 | 0.22 | 28  |
| 10 F59B8.2  | AAGIWYEHRLIDDMVAQAMK      | 13  | 1469  | 0.79 | 0.18 | 22  |
| 22 F59B8.2  | FPLYLSTK                  | 14  | 1089  | 0.79 | 0.46 | 58  |
| 7 F59B8.2   | SDGGFVWACK                | 14  | 1147  | 0.80 | 0.13 | 16  |
| 10 F59B8.2  | GGNASAVTRTDYLNTEFLDK      | 35  | 3190  | 0.81 | 0.14 | 17  |
| 10 F59B8.2  | GGNASAVTRTDYLNTEFLDK      | 34  | 2092  | 0.81 | 0.11 | 14  |
| 22 F59B8.2  | FPLYLSTK                  | 79  | 35423 | 0.85 | 0.09 | 10  |
| 7 F59B8.2   | FPLYLSTK                  | 34  | 2573  | 0.85 | 0.15 | 17  |
| 10 F59B8.2  | FPLYLSTK                  | 13  | 1018  | 0.88 | 0.25 | 28  |
| 22 F59B8.2  | LAENLAK                   | 19  | 3564  | 0.89 | 0.24 | 27  |
| 7 F59B8.2   | SDGGFVWACK                | 18  | 1392  | 0.89 | 0.15 | 17  |
| 10 F59B8.2  | FPLYLSTK                  | 64  | 9585  | 0.91 | 0.11 | 12  |
| 10 F59B8.2  | FPLYLSTK                  | 64  | 14859 | 0.93 | 0.12 | 13  |
| 10 F59B8.2  | FPLYLSTK                  | 61  | 10453 | 0.94 | 0.08 | 9   |
| 22 F59B8.2  | AAGIWYEHRLIDDMVAQAMK      | 24  | 2926  | 0.96 | 0.24 | 25  |
| 10 F59B8.2  | FPLYLSTK                  | 67  | 14219 | 0.97 | 0.10 | 10  |
| 22 F59B8.2  | AAGIWYEHRLIDDMVAQAMK      | 19  | 4060  | 1.00 | 0.14 | 14  |
| 1 F59B8.2   | DIFAEIYPEYAEFK            | 10  | 756   | 1.01 | 0.11 | 11  |
| 22 F59B8.2  | FPLYLSTK                  | 63  | 34881 | 1.08 | 0.13 | 12  |
| 1 F59B8.2   | FPLYLSTK                  | 24  | 913   | 1.14 | 0.22 | 19  |
| 22 F59B8.2  | ATDFVVPGAGK               | 11  | 10435 | 1.17 | 0.19 | 16  |
| 22 F59B8.2  | ATDFVVPGAGK               | 15  | 10730 | 1.18 | 0.17 | 15  |
| 7 F59B8.2   | FPLYLSTK                  | 35  | 3628  | 1.23 | 0.09 | 7   |
| 22 F59B8.2  | FVSADGTQTIQETVDFK         | 110 | 2454  | 1.26 | 0.18 | 15  |
| 7 F59B8.2   | FPLYLSTK                  | 35  | 4995  | 1.26 | 0.12 | 9   |
| 22 F59B8.2  | DIFAEIYPEYAEFK            | 41  | 2534  | 1.26 | 0.12 | 10  |
| 7 F59B8.2   | FPLYLSTK                  | 34  | 1711  | 1.31 | 0.15 | 11  |
| 22 F59B8.2  | GGNASAVTRTDYLNTEFLDK      | 51  | 5167  | 1.34 | 0.12 | 9   |
| 22 F59B8.2  | DIFAEIYPEYAEFK            | 62  | 3024  | 1.36 | 0.13 | 10  |

|                        |                           |    |       |       |      |     |
|------------------------|---------------------------|----|-------|-------|------|-----|
| 22 F59B8.2             | GGNASAVTRTDYLNTEFLDK      | 85 | 3815  | 1.37  | 0.20 | 15  |
| 22 F59B8.2             | FVSADGTQTIQETVDFDK        | 38 | 3352  | 1.38  | 0.13 | 9   |
| 22 F59B8.2             | FPLYLSTK                  | 21 | 1180  | 1.39  | 0.17 | 12  |
| 22 F59B8.2             | GGNASAVTRTDYLNTEFLDK      | 38 | 1451  | 1.39  | 0.18 | 13  |
| 22 F59B8.2             | FVSADGTQTIQETVDFDK        | 20 | 2492  | 1.40  | 0.14 | 10  |
| 22 F59B8.2             | FVSADGTQTIQETVDFDK        | 98 | 2267  | 1.43  | 0.12 | 9   |
| 22 F59B8.2             | GPGVSLSMYNTDDSIIRDFAHASFK | 44 | 14875 | 1.47  | 0.13 | 9   |
| 22 F59B8.2             | GGNASAVTRTDYLNTEFLDK      | 19 | 1334  | 1.49  | 0.14 | 10  |
| 22 F59B8.2             | GPGVSLSMYNTDDSIIRDFAHASFK | 46 | 26093 | 1.57  | 0.13 | 8   |
| 22 F59B8.2             | AAGIWYEHRLIDDMVAQAMK      | 17 | 4705  | 1.73  | 0.20 | 11  |
| 22 F59B8.2             | YALQRK                    | 14 | 4812  | 1.88  | 0.05 | 3   |
| 22 F59B8.2             | FPLYLSTK                  | 31 | 2782  | 1.90  | 0.13 | 7   |
| 7 F59B8.2              | FPLYLSTK                  | 29 | 3144  | 2.26  | 0.16 | 7   |
| 1 F59B8.2              | GPGVSLSMYNTDDSIIRDFAHASFK | 18 | 5422  | 2.29  | 0.15 | 6   |
| 10 F59B8.2             | CATITPDEARVEEFK           | 15 | 7145  | 2.87  | 0.60 | 21  |
| 10 F59B8.2             | FPLYLSTK                  | 40 | 1876  | 3.01  | 0.12 | 4   |
| 22 F59B8.2             | FPLYLSTK                  | 34 | 2485  | 3.70  | 0.16 | 4   |
| 22 F59B8.2             | FPLYLSTK                  | 32 | 1686  | 5.17  | 0.08 | 1   |
| 22 F59B8.2             | CATITPDEARVEEFK           | 14 | 3936  | 12.49 | 0.22 | 2   |
| 10 F59D8.1             | SLEQRELSDELK              | 18 | 5890  | 0.44  | 0.17 | 38  |
| 22 F59D8.1             | LIEQFYQQGDQAEVNPFK        | 27 | 1743  | 0.47  | 0.19 | 41  |
| 22 F59D8.1             | SLEQRELSDELK              | 26 | 1259  | 0.49  | 0.16 | 32  |
| 10 F59D8.1             | SLEQRELSDELK              | 26 | 4636  | 0.50  | 0.09 | 18  |
| 22 F59D8.1             | SLEQRELSDELK              | 14 | 1512  | 0.51  | 0.13 | 26  |
| 22 F59D8.1             | SLEQRELSDELK              | 16 | 2022  | 0.57  | 0.27 | 48  |
| 22 F59D8.1             | SLEQRELSDELK              | 19 | 1620  | 0.58  | 0.24 | 41  |
| 22 F59D8.1             | LIEQFYQQGDQAEVNPFK        | 28 | 1708  | 0.66  | 0.11 | 16  |
| 1 F59D8.1              | SLEQRELSDELK              | 19 | 2394  | 0.67  | 0.08 | 12  |
| 10 F59D8.1             | LIEQFYQQGDQAEVNPFK        | 24 | 1522  | 0.70  | 0.14 | 21  |
| 22 F59D8.1             | SLEQRELSDELK              | 21 | 3357  | 0.71  | 0.09 | 12  |
| 1 F59D8.1              | SLEQRELSDELK              | 13 | 528   | 0.73  | 0.21 | 28  |
| 10 F59D8.1             | SLEQRELSDELK              | 12 | 4265  | 0.75  | 0.15 | 20  |
| 22 F59D8.1             | LQSEVHSIYTLNVNGQEVVK      | 44 | 2588  | 0.75  | 0.09 | 13  |
| 22 F59D8.1             | SLEQRELSDELK              | 25 | 5172  | 0.78  | 0.16 | 20  |
| 10 F59D8.1             | SLEQRELSDELK              | 13 | 3289  | 0.78  | 0.09 | 12  |
| 10 F59D8.1             | SLEQRELSDELK              | 16 | 3322  | 0.79  | 0.06 | 8   |
| 10 F59D8.1             | SLEQRELSDELK              | 24 | 3870  | 0.86  | 0.18 | 21  |
| 22 F59D8.1             | SLEQRELSDELK              | 16 | 2786  | 0.90  | 0.15 | 17  |
| 22 F59D8.1             | SLEQRELSDELK              | 17 | 3885  | 0.98  | 0.18 | 18  |
| 22 F59D8.1             | EAREQTVADLVDFPVSFVESVK    | 23 | 2568  | 1.07  | 0.11 | 10  |
| 10 F59D8.1             | SLEQRELSDELK              | 31 | 2776  | 1.12  | 0.05 | 5   |
| 10 F59D8.1             | SLEQRELSDELK              | 15 | 3163  | 1.12  | 0.09 | 8   |
| 10 F59D8.1             | LIEQFYQQGDQAEVNPFK        | 37 | 1374  | 1.15  | 0.22 | 19  |
| 22 F59D8.1             | LQSEVHSIYTLNVNGQEVVK      | 43 | 2361  | 1.17  | 0.13 | 11  |
| 22 F59D8.1             | EAREQTVADLVDFPVSFVESVK    | 30 | 1945  | 1.26  | 0.14 | 11  |
| 10 F59D8.1             | SLEQRELSDELK              | 29 | 3216  | 1.34  | 0.09 | 7   |
| 10 F59D8.1             | SLEQRELSDELK              | 17 | 2760  | 1.35  | 0.12 | 9   |
| 10 F59D8.1             | SLEQRELSDELK              | 29 | 2584  | 1.41  | 0.12 | 9   |
| 1 F59D8.1              | SLEQRELSDELK              | 16 | 852   | 1.68  | 0.21 | 12  |
| 22 F59D8.2             | IESLEQRELSDELK            | 40 | 2395  | 0.32  | 0.43 | 136 |
| 22 F59D8.2             | LIEQFYK                   | 25 | 2127  | 0.33  | 0.17 | 51  |
| 22 F59D8.2             | LIEQFYK                   | 27 | 2146  | 0.33  | 0.11 | 34  |
| 22 F59D8.2             | LIEQFYK                   | 21 | 2390  | 0.33  | 0.25 | 76  |
| 22 F59D8.2             | LIEQFYK                   | 28 | 2474  | 0.34  | 0.09 | 28  |
| 10 F59D8.2             | IESLEQRELSDELK            | 24 | 1817  | 0.38  | 0.40 | 104 |
| 1 F59D8.2              | IESLEQRELSDELK            | 11 | 810   | 0.41  | 0.06 | 15  |
| 7 F59D8.2              | IESLEQRELSDELK            | 30 | 2118  | 0.42  | 0.41 | 100 |
| 22 F59D8.2             | IESLEQRELSDELK            | 31 | 1561  | 0.42  | 0.48 | 116 |
| 22 F59D8.2             | IESLEQRELSDELK            | 31 | 1927  | 0.45  | 0.39 | 87  |
| 22 F59D8.2             | IESLEQRELSDELK            | 26 | 1423  | 0.45  | 0.07 | 16  |
| 22 F59D8.2             | IESLEQRELSDELK            | 31 | 1389  | 0.46  | 0.48 | 103 |
| 1 F59D8.2              | IESLEQRELSDELK            | 25 | 928   | 0.47  | 0.27 | 57  |
| 10 F59D8.2             | LIEQFYK                   | 26 | 2507  | 0.51  | 0.13 | 25  |
| 22 F59D8.2             | LIEQFYK                   | 21 | 2165  | 0.55  | 0.28 | 52  |
| 10 F59D8.2             | LIEQFYK                   | 34 | 2392  | 0.56  | 0.15 | 27  |
| 22 F59D8.2             | IESLEQRELSDELK            | 24 | 1354  | 0.57  | 0.24 | 41  |
| 22 F59D8.2             | IESLEQRELSDELK            | 24 | 1684  | 0.58  | 0.25 | 42  |
| 22 F59D8.2             | IESLEQRELSDELK            | 21 | 1790  | 0.67  | 0.34 | 50  |
| 22 F59D8.2             | LIEQFYK                   | 21 | 2516  | 0.67  | 0.12 | 17  |
| 10 F59D8.2             | IESLEQRELSDELK            | 11 | 2815  | 0.77  | 0.16 | 20  |
| 22 F59D8.2             | LIEQFYK                   | 22 | 1497  | 0.78  | 0.16 | 20  |
| 22 F59D8.2             | IESLEQRELSDELK            | 23 | 1241  | 0.79  | 0.55 | 70  |
| 10 F59D8.2             | IESLEQRELSDELK            | 24 | 1169  | 0.79  | 0.10 | 12  |
| 22 F59D8.2             | IESLEQRELSDELK            | 19 | 1771  | 0.82  | 0.19 | 23  |
| 22 F59D8.2             | LIEQFYK                   | 22 | 3029  | 0.84  | 0.17 | 20  |
| 22 F59D8.2             | LIEQFYK                   | 15 | 2970  | 0.89  | 0.09 | 10  |
| 10 F59D8.2             | LIEQFYK                   | 30 | 3768  | 0.93  | 0.11 | 12  |
| 10 F59D8.2             | IESLEQRELSDELK            | 17 | 1581  | 1.10  | 0.16 | 15  |
| 10 F59D8.2             | LIEQFYK                   | 40 | 2706  | 1.13  | 0.10 | 9   |
| 10 F59D8.2             | LIEQFYK                   | 29 | 3460  | 1.13  | 0.12 | 10  |
| 10 F59D8.2             | LIEQFYK                   | 34 | 2171  | 1.22  | 0.14 | 12  |
| 10 F59D8.2             | LIEQFYK                   | 30 | 1787  | 1.22  | 0.09 | 7   |
| 10 F59D8.2             | LIEQFYK                   | 40 | 2775  | 1.24  | 0.07 | 6   |
| 10 F59D8.2             | IESLEQRELSDELK            | 15 | 608   | 1.30  | 0.21 | 16  |
| 10 F59D8.2             | IESLEQRELSDELK            | 25 | 801   | 1.46  | 0.05 | 4   |
| 10 F59D8.2             | IESLEQRELSDELK            | 13 | 768   | 1.55  | 0.20 | 13  |
| 10 F59D8.2             | LIEQFYK                   | 21 | 2278  | 1.85  | 0.15 | 8   |
| 10 F59D8.2             | LIEQFYK                   | 36 | 3050  | 2.06  | 0.14 | 7   |
| 22 F59D8.2             | LIEQFYK                   | 26 | 2362  | 2.51  | 0.14 | 5   |
| 22 F59D8.2             | LIEQFYK                   | 19 | 1982  | 2.85  | 0.06 | 2   |
| 10 F59D8.2             | TMEGDCEVAYTIVQEGGK        | 32 | 1818  | 4.70  | 0.43 | 9   |
| 22 H06H21.8b;H06H21.8a | VFAVEHIPGLK               | 31 | 3207  | 1.27  | 0.08 | 6   |
| 22 H06H21.8b;H06H21.8a | ELIDRALGIVEDIEALK         | 12 | 2624  | 2.13  | 0.37 | 17  |
| 22 H06H21.8b;H06H21.8a | ELIDRALGIVEDIEALK         | 15 | 2949  | 3.35  | 0.58 | 17  |
| 1 H06H21.9             | RKPTTTPK                  | 10 | 542   | 1.06  | 0.32 | 30  |
| 7 H06O01.1             | TVAEFEK                   | 37 | 1661  | 0.21  | 0.26 | 127 |
| 10 H06O01.1            | DFVSFISK                  | 13 | 1870  | 0.22  | 0.24 | 111 |
| 10 H06O01.1            | DSDKPIVAILTNEGK           | 31 | 10162 | 0.24  | 0.47 | 198 |
| 10 H06O01.1            | DFVSFISK                  | 28 | 2180  | 0.24  | 0.23 | 95  |
| 7 H06O01.1             | DFVSFISK                  | 34 | 3832  | 0.32  | 0.39 | 123 |
| 10 H06O01.1            | YEELAEK                   | 19 | 865   | 0.33  | 0.10 | 32  |

|             |                        |    |       |      |      |     |
|-------------|------------------------|----|-------|------|------|-----|
| 10 H06O01.1 | IFRNGVPAQDYDGPRDADGIVK | 16 | 7057  | 0.34 | 0.13 | 38  |
| 22 H06O01.1 | AGYSDDVVVFVPK          | 48 | 1734  | 0.38 | 0.23 | 59  |
| 7 H06O01.1  | IFRNGVPAQDYDGPRDADGIVK | 12 | 7803  | 0.39 | 0.09 | 23  |
| 7 H06O01.1  | AGYSDDVVVFVPK          | 31 | 2785  | 0.40 | 0.17 | 41  |
| 7 H06O01.1  | IFRNGVPAQDYDGPRDADGIVK | 11 | 9580  | 0.41 | 0.08 | 21  |
| 22 H06O01.1 | AGYSDDVVVFVPK          | 26 | 1478  | 0.43 | 0.18 | 42  |
| 7 H06O01.1  | AGYSDDVVVFVPK          | 41 | 2217  | 0.43 | 0.15 | 34  |
| 10 H06O01.1 | ELIMDADK               | 19 | 2025  | 0.43 | 0.23 | 54  |
| 22 H06O01.1 | DFVSFISK               | 35 | 1684  | 0.44 | 0.16 | 36  |
| 10 H06O01.1 | DFVSFISK               | 30 | 1865  | 0.45 | 0.12 | 28  |
| 22 H06O01.1 | IFRNGVPAQDYDGPRDADGIVK | 20 | 3397  | 0.46 | 0.55 | 121 |
| 1 H06O01.1  | SNPIPYNGGREVK          | 14 | 375   | 0.47 | 0.14 | 31  |
| 22 H06O01.1 | AGYSDDVVVFVPK          | 12 | 2568  | 0.47 | 0.20 | 42  |
| 1 H06O01.1  | AGYSDDVVVFVPK          | 25 | 633   | 0.50 | 0.23 | 46  |
| 7 H06O01.1  | DFVSFISK               | 28 | 6088  | 0.50 | 0.09 | 18  |
| 7 H06O01.1  | AGYSDDVVVFVPK          | 26 | 1293  | 0.50 | 0.18 | 37  |
| 22 H06O01.1 | IAPEYERAAPK            | 33 | 19059 | 0.51 | 0.08 | 15  |
| 7 H06O01.1  | AGYSDDVVVFVPK          | 38 | 4696  | 0.51 | 0.07 | 14  |
| 7 H06O01.1  | AGYSDDVVVFVPK          | 25 | 1562  | 0.53 | 0.09 | 18  |
| 22 H06O01.1 | DFVSFISK               | 36 | 3189  | 0.53 | 0.18 | 35  |
| 7 H06O01.1  | DFVSFISK               | 36 | 4943  | 0.53 | 0.17 | 31  |
| 1 H06O01.1  | AGYSDDVVVFVPK          | 33 | 1486  | 0.53 | 0.13 | 24  |
| 22 H06O01.1 | DFVSFISK               | 24 | 3634  | 0.53 | 0.10 | 18  |
| 7 H06O01.1  | AGYSDDVVVFVPK          | 39 | 1514  | 0.53 | 0.13 | 23  |
| 10 H06O01.1 | DFVSFISK               | 36 | 2516  | 0.53 | 0.23 | 43  |
| 1 H06O01.1  | DFVSFISK               | 29 | 1255  | 0.54 | 0.24 | 45  |
| 1 H06O01.1  | IFRNGVPAQDYDGPRDADGIVK | 12 | 4730  | 0.54 | 0.12 | 23  |
| 22 H06O01.1 | DFVSFISK               | 24 | 4921  | 0.55 | 0.11 | 21  |
| 22 H06O01.1 | EEFSSEIETNGLGERK       | 32 | 1784  | 0.55 | 0.15 | 26  |
| 1 H06O01.1  | AGYSDDVVVFVPK          | 43 | 2631  | 0.56 | 0.07 | 13  |
| 10 H06O01.1 | IAPEYERAAPK            | 39 | 8781  | 0.56 | 0.13 | 23  |
| 22 H06O01.1 | DFVSFISK               | 35 | 2132  | 0.57 | 0.19 | 34  |
| 1 H06O01.1  | IAPEYERAAPK            | 25 | 2708  | 0.57 | 0.12 | 22  |
| 7 H06O01.1  | DFVSFISK               | 30 | 3828  | 0.58 | 0.12 | 20  |
| 10 H06O01.1 | DFVSFISK               | 46 | 4546  | 0.59 | 0.18 | 31  |
| 7 H06O01.1  | DFVSFISK               | 39 | 5565  | 0.59 | 0.13 | 23  |
| 7 H06O01.1  | DFVSFISK               | 39 | 3324  | 0.59 | 0.11 | 19  |
| 10 H06O01.1 | DFVSFISK               | 25 | 3517  | 0.59 | 0.08 | 14  |
| 1 H06O01.1  | LASNDPPVALVK           | 10 | 601   | 0.59 | 0.38 | 65  |
| 7 H06O01.1  | SNPIPYNGGREVK          | 14 | 1218  | 0.60 | 0.23 | 38  |
| 7 H06O01.1  | SNPIPYNGGREVK          | 18 | 1018  | 0.60 | 0.23 | 39  |
| 22 H06O01.1 | IFRNGVPAQDYDGPRDADGIVK | 13 | 32166 | 0.60 | 0.06 | 10  |
| 10 H06O01.1 | IAPEYERAAPK            | 51 | 6752  | 0.60 | 0.09 | 15  |
| 10 H06O01.1 | AGYSDDVVVFVPK          | 12 | 1199  | 0.60 | 0.04 | 7   |
| 1 H06O01.1  | AGYSDDVVVFVPK          | 73 | 4296  | 0.61 | 0.13 | 22  |
| 10 H06O01.1 | DFVSFISK               | 17 | 2647  | 0.61 | 0.10 | 17  |
| 22 H06O01.1 | SNPIPYNGGREVK          | 38 | 4207  | 0.61 | 0.15 | 24  |
| 10 H06O01.1 | AGYSDDVVVFVPK          | 30 | 1958  | 0.62 | 0.18 | 30  |
| 7 H06O01.1  | DFVSFISK               | 21 | 3523  | 0.63 | 0.17 | 28  |
| 1 H06O01.1  | VADTERDRFSFAHTSNK      | 12 | 3808  | 0.63 | 0.13 | 20  |
| 10 H06O01.1 | AGYSDDVVVFVPK          | 34 | 1691  | 0.64 | 0.13 | 20  |
| 22 H06O01.1 | IAPEYERAAPK            | 25 | 7956  | 0.64 | 0.17 | 27  |
| 1 H06O01.1  | AGYSDDVVVFVPK          | 23 | 1415  | 0.64 | 0.10 | 15  |
| 22 H06O01.1 | DFVSFISK               | 32 | 3976  | 0.64 | 0.11 | 16  |
| 22 H06O01.1 | AGYSDDVVVFVPK          | 16 | 1673  | 0.64 | 0.16 | 26  |
| 1 H06O01.1  | SNPIPYNGGREVK          | 18 | 3533  | 0.65 | 0.10 | 15  |
| 7 H06O01.1  | IAPEYERAAPK            | 47 | 12589 | 0.65 | 0.13 | 20  |
| 10 H06O01.1 | DFVSFISK               | 15 | 1738  | 0.65 | 0.08 | 12  |
| 10 H06O01.1 | AGYSDDVVVFVPK          | 20 | 1410  | 0.66 | 0.18 | 27  |
| 10 H06O01.1 | AGYSDDVVVFVPK          | 12 | 1533  | 0.66 | 0.13 | 19  |
| 22 H06O01.1 | DSDKPIVAILTNEGK        | 45 | 14386 | 0.66 | 0.47 | 70  |
| 10 H06O01.1 | IAPEYERAAPK            | 22 | 4337  | 0.67 | 0.21 | 32  |
| 10 H06O01.1 | DFVSFISK               | 26 | 4946  | 0.70 | 0.10 | 15  |
| 1 H06O01.1  | AGYSDDVVVFVPK          | 32 | 1968  | 0.71 | 0.12 | 16  |
| 10 H06O01.1 | DFVSFISK               | 29 | 4091  | 0.71 | 0.15 | 21  |
| 10 H06O01.1 | IFRNGVPAQDYDGPRDADGIVK | 14 | 5949  | 0.71 | 0.45 | 64  |
| 7 H06O01.1  | DFVSFISK               | 27 | 2080  | 0.72 | 0.23 | 32  |
| 7 H06O01.1  | DFVSFISK               | 35 | 2489  | 0.74 | 0.14 | 19  |
| 22 H06O01.1 | DFVSFISK               | 20 | 2161  | 0.74 | 0.13 | 18  |
| 22 H06O01.1 | AGYSDDVVVFVPK          | 33 | 2556  | 0.75 | 0.15 | 20  |
| 7 H06O01.1  | IFRNGVPAQDYDGPRDADGIVK | 20 | 14903 | 0.75 | 0.10 | 13  |
| 22 H06O01.1 | AGYSDDVVVFVPK          | 13 | 914   | 0.76 | 0.37 | 49  |
| 10 H06O01.1 | AGYSDDVVVFVPK          | 33 | 4345  | 0.76 | 0.11 | 15  |
| 7 H06O01.1  | DFVSFISK               | 15 | 2522  | 0.76 | 0.10 | 13  |
| 22 H06O01.1 | DFVSFISK               | 23 | 2219  | 0.76 | 0.12 | 16  |
| 1 H06O01.1  | IAPEYERAAPK            | 58 | 8397  | 0.76 | 0.06 | 8   |
| 22 H06O01.1 | IAPEYERAAPK            | 38 | 7510  | 0.76 | 0.09 | 12  |
| 22 H06O01.1 | SNPIPYNGGREVK          | 36 | 6932  | 0.76 | 0.05 | 6   |
| 1 H06O01.1  | IFRNGVPAQDYDGPRDADGIVK | 25 | 9248  | 0.77 | 0.08 | 10  |
| 10 H06O01.1 | ELIMDADK               | 10 | 1375  | 0.77 | 0.46 | 60  |
| 10 H06O01.1 | VQFAVSNK               | 39 | 4143  | 0.77 | 0.22 | 29  |
| 1 H06O01.1  | SNPIPYNGGREVK          | 33 | 7779  | 0.77 | 0.19 | 24  |
| 1 H06O01.1  | IAPEYERAAPK            | 16 | 2463  | 0.78 | 0.12 | 16  |
| 22 H06O01.1 | IAPEYERAAPK            | 32 | 3761  | 0.79 | 0.16 | 20  |
| 10 H06O01.1 | IAPEYERAAPK            | 37 | 4927  | 0.79 | 0.06 | 8   |
| 10 H06O01.1 | AGYSDDVVVFVPK          | 14 | 2729  | 0.79 | 0.08 | 10  |
| 22 H06O01.1 | EEFSSEIETNGLGERK       | 31 | 1140  | 0.79 | 0.15 | 19  |
| 1 H06O01.1  | VQFAVSNK               | 11 | 1006  | 0.82 | 0.18 | 22  |
| 22 H06O01.1 | IAPEYERAAPK            | 33 | 3030  | 0.82 | 0.20 | 24  |
| 7 H06O01.1  | AGYSDDVVVFVPK          | 31 | 3425  | 0.83 | 0.09 | 10  |
| 10 H06O01.1 | DSDKPIVAILTNEGK        | 31 | 14427 | 0.83 | 0.25 | 31  |
| 1 H06O01.1  | AGYSDDVVVFVPK          | 74 | 2475  | 0.84 | 0.09 | 11  |
| 1 H06O01.1  | IAPEYERAAPK            | 53 | 12062 | 0.85 | 0.10 | 11  |
| 22 H06O01.1 | SNPIPYNGGREVK          | 30 | 10437 | 0.88 | 0.13 | 15  |
| 10 H06O01.1 | FMRGQSGPSSK            | 12 | 1199  | 0.89 | 0.19 | 21  |
| 1 H06O01.1  | AGYSDDVVVFVPK          | 26 | 626   | 0.90 | 0.09 | 10  |
| 22 H06O01.1 | IFRNGVPAQDYDGPRDADGIVK | 10 | 2439  | 0.91 | 0.35 | 38  |
| 10 H06O01.1 | SNPIPYNGGREVK          | 39 | 7774  | 0.91 | 0.07 | 8   |
| 1 H06O01.1  | IFRNGVPAQDYDGPRDADGIVK | 11 | 9180  | 0.91 | 0.15 | 16  |
| 7 H06O01.1  | AGYSDDVVVFVPK          | 13 | 1195  | 0.92 | 0.16 | 17  |
| 1 H06O01.1  | AGYSDDVVVFVPK          | 56 | 2187  | 0.92 | 0.07 | 8   |

|                        |                        |    |       |      |      |     |
|------------------------|------------------------|----|-------|------|------|-----|
| 22 H06O01.1            | DFVSFISK               | 27 | 1987  | 0.92 | 0.10 | 10  |
| 10 H06O01.1            | DFVSFISK               | 25 | 3291  | 0.92 | 0.08 | 9   |
| 7 H06O01.1             | FMRGQSGPSSK            | 16 | 1978  | 0.92 | 0.13 | 14  |
| 10 H06O01.1            | AGYSDDVVVFVPK          | 42 | 1678  | 0.96 | 0.17 | 17  |
| 22 H06O01.1            | FMRGQSGPSSK            | 16 | 5288  | 0.96 | 0.19 | 20  |
| 7 H06O01.1             | DFVSFISK               | 20 | 2906  | 0.97 | 0.10 | 11  |
| 1 H06O01.1             | FMRGQSGPSSK            | 45 | 3686  | 0.98 | 0.13 | 13  |
| 10 H06O01.1            | AGYSDDVVVFVPK          | 17 | 1493  | 0.98 | 0.19 | 20  |
| 1 H06O01.1             | SNPIPYNGGREVK          | 20 | 6316  | 0.99 | 0.06 | 6   |
| 1 H06O01.1             | IFRNGVPAQDYDGPRDADGIVK | 13 | 6461  | 1.00 | 0.06 | 6   |
| 22 H06O01.1            | IAPEYERAAPK            | 62 | 24372 | 1.02 | 0.17 | 17  |
| 10 H06O01.1            | IFRNGVPAQDYDGPRDADGIVK | 19 | 20863 | 1.02 | 0.10 | 10  |
| 7 H06O01.1             | IAPEYERAAPK            | 25 | 2591  | 1.10 | 0.18 | 17  |
| 22 H06O01.1            | IAPEYERAAPK            | 32 | 15026 | 1.10 | 0.09 | 8   |
| 22 H06O01.1            | FMRGQSGPSSK            | 26 | 5003  | 1.11 | 0.11 | 9   |
| 7 H06O01.1             | DFVSFISK               | 23 | 3679  | 1.13 | 0.17 | 15  |
| 7 H06O01.1             | DFVSFISK               | 23 | 1641  | 1.14 | 0.57 | 50  |
| 1 H06O01.1             | FMRGQSGPSSK            | 45 | 2967  | 1.28 | 0.09 | 7   |
| 1 H06O01.1             | FMRGQSGPSSK            | 21 | 2131  | 1.29 | 0.13 | 10  |
| 7 H06O01.1             | SNPIPYNGGREVK          | 18 | 3813  | 1.30 | 0.10 | 8   |
| 10 H06O01.1            | IAPEYERAAPK            | 40 | 18159 | 1.31 | 0.16 | 12  |
| 10 H06O01.1            | DFVSFISK               | 27 | 4168  | 1.33 | 0.10 | 7   |
| 7 H06O01.1             | IAPEYERAAPK            | 56 | 7477  | 1.37 | 0.14 | 10  |
| 7 H06O01.1             | FMRGQSGPSSK            | 13 | 424   | 1.41 | 0.13 | 9   |
| 10 H06O01.1            | IAPEYERAAPK            | 48 | 17088 | 1.41 | 0.11 | 8   |
| 7 H06O01.1             | IAPEYERAAPK            | 42 | 4756  | 1.45 | 0.11 | 7   |
| 22 H06O01.1            | IFRNGVPAQDYDGPRDADGIVK | 11 | 6936  | 1.45 | 0.21 | 14  |
| 22 H06O01.1            | SNPIPYNGGREVK          | 22 | 12165 | 1.47 | 0.08 | 6   |
| 10 H06O01.1            | DFVSFISK               | 17 | 3104  | 1.49 | 0.12 | 8   |
| 7 H06O01.1             | VQFAVSNK               | 19 | 7426  | 1.53 | 0.13 | 9   |
| 22 H06O01.1            | FMRGQSGPSSK            | 18 | 3763  | 1.56 | 0.12 | 8   |
| 22 H06O01.1            | SNPIPYNGGREVK          | 34 | 8829  | 1.60 | 0.11 | 7   |
| 22 H06O01.1            | DFVSFISK               | 20 | 2661  | 1.75 | 0.16 | 9   |
| 10 H06O01.1            | FMRGQSGPSSK            | 16 | 4161  | 1.76 | 0.07 | 4   |
| 1 H06O01.1             | IAPEYERAAPK            | 34 | 5393  | 1.78 | 0.16 | 9   |
| 10 H06O01.1            | FMRGQSGPSSK            | 27 | 4944  | 1.80 | 0.08 | 5   |
| 22 H06O01.1            | DFVSFISK               | 44 | 4188  | 1.85 | 0.12 | 7   |
| 22 H06O01.1            | DFVSFISK               | 13 | 1240  | 1.87 | 0.18 | 10  |
| 1 H06O01.1             | IAPEYERAAPK            | 28 | 3404  | 2.02 | 0.06 | 3   |
| 22 H06O01.1            | FMRGQSGPSSK            | 20 | 3707  | 2.02 | 0.15 | 8   |
| 10 H06O01.1            | FMRGQSGPSSK            | 31 | 3446  | 2.05 | 0.09 | 4   |
| 7 H06O01.1             | VQFAVSNK               | 23 | 7658  | 2.11 | 0.05 | 2   |
| 7 H06O01.1             | FMRGQSGPSSK            | 13 | 1747  | 2.59 | 0.14 | 6   |
| 22 H06O01.1            | IAPEYERAAPK            | 44 | 5746  | 2.70 | 0.14 | 5   |
| 22 H06O01.3            | HLIQIK                 | 24 | 7099  | 2.02 | 0.39 | 19  |
| 10 H06O01.3            | HLIQIK                 | 13 | 2238  | 4.61 | 0.25 | 5   |
| 7 H13N06.3a;H13N06.3b  | SVTNEILETGHK           | 49 | 1876  | 0.94 | 0.06 | 6   |
| 10 H14A12.2a           | ERDTFGELEVPADK         | 29 | 6164  | 0.08 | 0.63 | 804 |
| 10 H14A12.2a           | ERDTFGELEVPADK         | 20 | 4512  | 0.09 | 0.13 | 145 |
| 10 H14A12.2a           | IGGPEERMPIPIVIAFGILK   | 19 | 4514  | 0.13 | 0.27 | 214 |
| 10 H14A12.2a           | IGGPEERMPIPIVIAFGILK   | 12 | 4020  | 0.22 | 0.20 | 91  |
| 10 H14A12.2a           | YYGAQTARSQMNFK         | 51 | 1831  | 0.28 | 0.11 | 39  |
| 10 H14A12.2a           | YYGAQTARSQMNFK         | 59 | 2318  | 0.34 | 0.21 | 62  |
| 10 H14A12.2a           | AAALVNTEFGLDK          | 72 | 2350  | 0.35 | 0.18 | 51  |
| 10 H14A12.2a           | VAATVSELTGLPFVTAPNK    | 46 | 1041  | 0.36 | 0.20 | 56  |
| 10 H14A12.2a           | AAALVNTEFGLDK          | 26 | 971   | 0.38 | 0.18 | 49  |
| 10 H14A12.2a           | VAATVSELTGLPFVTAPNK    | 28 | 1617  | 0.46 | 0.23 | 50  |
| 10 H14A12.2a           | LADAIQAADEVVDGK        | 49 | 609   | 0.47 | 0.17 | 36  |
| 10 H14A12.2a           | VAATVSELTGLPFVTAPNK    | 37 | 1773  | 0.53 | 0.14 | 26  |
| 10 H14A12.2a           | ERDTFGELEVPADK         | 52 | 6073  | 0.57 | 0.10 | 18  |
| 10 H14A12.2a           | ERDTFGELEVPADK         | 48 | 5704  | 0.60 | 0.10 | 16  |
| 10 H14A12.2a           | LADAIQAADEVVDGK        | 44 | 829   | 0.63 | 0.16 | 25  |
| 10 H14A12.2a           | LADAIQAADEVVDGK        | 60 | 784   | 0.69 | 0.25 | 37  |
| 10 H14A12.2a           | ERDTFGELEVPADK         | 21 | 1659  | 0.73 | 0.33 | 45  |
| 10 H14A12.2a           | AAALVNTEFGLDK          | 60 | 1833  | 0.77 | 0.12 | 16  |
| 10 H14A12.2a           | AAALVNTEFGLDK          | 60 | 1789  | 0.78 | 0.16 | 20  |
| 10 H14A12.2a           | AAALVNTEFGLDK          | 11 | 888   | 0.79 | 0.23 | 29  |
| 10 H14A12.2a           | VAATVSELTGLPFVTAPNK    | 31 | 1432  | 0.82 | 0.19 | 24  |
| 10 H14A12.2a           | ERDTFGELEVPADK         | 11 | 4902  | 0.88 | 0.11 | 12  |
| 10 H14A12.2a           | VAATVSELTGLPFVTAPNK    | 23 | 1245  | 0.89 | 0.16 | 18  |
| 10 H14A12.2a           | ERDTFGELEVPADK         | 10 | 5527  | 0.92 | 0.21 | 23  |
| 10 H14A12.2a           | YYGAQTARSQMNFK         | 44 | 2553  | 0.96 | 0.16 | 17  |
| 10 H14A12.2a           | AAALVNTEFGLDK          | 66 | 2203  | 0.96 | 0.14 | 14  |
| 10 H14A12.2a           | NGTTLVQEAVK            | 77 | 7048  | 0.97 | 0.11 | 11  |
| 10 H14A12.2a           | YYGAQTARSQMNFK         | 11 | 891   | 0.99 | 0.12 | 12  |
| 10 H14A12.2a           | NGTTLVQEAVK            | 53 | 4736  | 1.04 | 0.22 | 21  |
| 10 H14A12.2a           | ERDTFGELEVPADK         | 10 | 4572  | 1.07 | 0.16 | 15  |
| 10 H14A12.2a           | LADAIQAADEVVDGK        | 46 | 457   | 1.13 | 0.20 | 17  |
| 10 H14A12.2a           | AAALVNTEFGLDK          | 27 | 1520  | 1.26 | 0.12 | 10  |
| 10 H14A12.2a           | AAALVNTEFGLDK          | 62 | 2147  | 1.29 | 0.11 | 9   |
| 10 H14A12.2a           | ERDTFGELEVPADK         | 39 | 4780  | 1.35 | 0.11 | 8   |
| 10 H14A12.2a           | ERDTFGELEVPADK         | 61 | 5673  | 1.43 | 0.08 | 5   |
| 10 H14A12.2a           | LRTALHNK               | 14 | 5574  | 1.46 | 0.18 | 12  |
| 10 H14A12.2a           | AAALVNTEFGLDK          | 75 | 2292  | 1.62 | 0.16 | 10  |
| 10 H14A12.2a           | YYGAQTARSQMNFK         | 30 | 1796  | 1.64 | 0.21 | 13  |
| 10 H14A12.2a           | AAALVNTEFGLDK          | 67 | 2147  | 1.67 | 0.15 | 9   |
| 10 H14A12.2a           | AAALVNTEFGLDK          | 30 | 1531  | 1.72 | 0.24 | 14  |
| 10 H14A12.2a           | YYGAQTARSQMNFK         | 40 | 2610  | 1.82 | 0.08 | 4   |
| 10 H14A12.2a           | LRTALHNK               | 16 | 2190  | 3.60 | 0.13 | 4   |
| 10 H14A12.2a           | LRTALHNK               | 14 | 1978  | 3.73 | 0.41 | 11  |
| 10 H14A12.2a           | LRTALHNK               | 38 | 24881 | 7.25 | 0.12 | 2   |
| 1 H14A12.2a;H14A12.2b  | AAALVNTEFGLDK          | 27 | 616   | 0.27 | 0.18 | 66  |
| 22 H14A12.2a;H14A12.2b | IGGPEERMPIPIVIAFGILK   | 18 | 2792  | 0.37 | 0.19 | 52  |
| 22 H14A12.2a;H14A12.2b | AAALVNTEFGLDK          | 48 | 1922  | 0.40 | 0.18 | 46  |
| 1 H14A12.2a;H14A12.2b  | ERDTFGELEVPADK         | 30 | 1867  | 0.42 | 0.24 | 56  |
| 1 H14A12.2a;H14A12.2b  | NGTTLVQEAVK            | 16 | 1639  | 0.43 | 0.12 | 27  |
| 22 H14A12.2a;H14A12.2b | YYGAQTARSQMNFK         | 37 | 1427  | 0.46 | 0.05 | 11  |
| 22 H14A12.2a;H14A12.2b | AAALVNTEFGLDK          | 47 | 1313  | 0.46 | 0.15 | 33  |
| 1 H14A12.2a;H14A12.2b  | AAALVNTEFGLDK          | 48 | 773   | 0.47 | 0.26 | 55  |
| 1 H14A12.2a;H14A12.2b  | NGTTLVQEAVK            | 31 | 2137  | 0.49 | 0.23 | 46  |
| 7 H14A12.2a;H14A12.2b  | AAALVNTEFGLDK          | 45 | 1272  | 0.50 | 0.24 | 48  |

|    |                                         |                     |    |       |      |      |    |
|----|-----------------------------------------|---------------------|----|-------|------|------|----|
| 22 | H14A12.2a;H14A12.2b                     | AAALVNTEFGLDK       | 49 | 1635  | 0.51 | 0.21 | 42 |
| 1  | H14A12.2a;H14A12.2b                     | ERDTFGELEVPADK      | 60 | 2889  | 0.52 | 0.12 | 23 |
| 22 | H14A12.2a;H14A12.2b                     | ERDTFGELEVPADK      | 40 | 3419  | 0.52 | 0.27 | 51 |
| 1  | H14A12.2a;H14A12.2b                     | ERDTFGELEVPADK      | 11 | 3670  | 0.53 | 0.10 | 19 |
| 22 | H14A12.2a;H14A12.2b                     | ERDTFGELEVPADK      | 35 | 4200  | 0.54 | 0.09 | 16 |
| 7  | H14A12.2a;H14A12.2b                     | AAALVNTEFGLDK       | 51 | 1204  | 0.55 | 0.15 | 28 |
| 7  | H14A12.2a;H14A12.2b                     | AAALVNTEFGLDK       | 33 | 910   | 0.56 | 0.10 | 17 |
| 22 | H14A12.2a;H14A12.2b                     | NGTTLVQEAVK         | 16 | 1995  | 0.57 | 0.17 | 31 |
| 1  | H14A12.2a;H14A12.2b                     | ERDTFGELEVPADK      | 24 | 1725  | 0.57 | 0.07 | 13 |
| 7  | H14A12.2a;H14A12.2b                     | ERDTFGELEVPADK      | 18 | 1479  | 0.57 | 0.25 | 44 |
| 22 | H14A12.2a;H14A12.2b                     | ERDTFGELEVPADK      | 17 | 1536  | 0.61 | 0.45 | 74 |
| 7  | H14A12.2a;H14A12.2b                     | YGAQTARSQMNFK       | 15 | 790   | 0.62 | 0.15 | 25 |
| 1  | H14A12.2a;H14A12.2b                     | ERDTFGELEVPADK      | 15 | 3063  | 0.63 | 0.17 | 27 |
| 1  | H14A12.2a;H14A12.2b                     | AAALVNTEFGLDK       | 41 | 864   | 0.65 | 0.07 | 11 |
| 22 | H14A12.2a;H14A12.2b                     | AAALVNTEFGLDK       | 61 | 2579  | 0.70 | 0.11 | 15 |
| 1  | H14A12.2a;H14A12.2b                     | YGAQTARSQMNFK       | 14 | 1207  | 0.71 | 0.12 | 18 |
| 22 | H14A12.2a;H14A12.2b                     | YGAQTARSQMNFK       | 52 | 3044  | 0.73 | 0.12 | 16 |
| 22 | H14A12.2a;H14A12.2b                     | AAALVNTEFGLDK       | 68 | 2200  | 0.74 | 0.13 | 18 |
| 7  | H14A12.2a;H14A12.2b                     | AAALVNTEFGLDK       | 15 | 837   | 0.75 | 0.24 | 32 |
| 7  | H14A12.2a;H14A12.2b                     | YGAQTARSQMNFK       | 36 | 3846  | 0.77 | 0.28 | 36 |
| 22 | H14A12.2a;H14A12.2b                     | AAALVNTEFGLDK       | 68 | 2083  | 0.79 | 0.13 | 17 |
| 1  | H14A12.2a;H14A12.2b                     | ERDTFGELEVPADK      | 59 | 3278  | 0.79 | 0.15 | 19 |
| 22 | H14A12.2a;H14A12.2b                     | NGTTLVQEAVK         | 60 | 7614  | 0.86 | 0.10 | 11 |
| 1  | H14A12.2a;H14A12.2b                     | AAALVNTEFGLDK       | 46 | 946   | 0.87 | 0.12 | 14 |
| 1  | H14A12.2a;H14A12.2b                     | YGAQTARSQMNFK       | 17 | 1113  | 0.88 | 0.27 | 30 |
| 1  | H14A12.2a;H14A12.2b                     | AAALVNTEFGLDK       | 33 | 555   | 0.91 | 0.15 | 16 |
| 7  | H14A12.2a;H14A12.2b                     | AAALVNTEFGLDK       | 59 | 2309  | 0.94 | 0.12 | 13 |
| 1  | H14A12.2a;H14A12.2b                     | AAALVNTEFGLDK       | 42 | 761   | 0.97 | 0.12 | 13 |
| 22 | H14A12.2a;H14A12.2b                     | YGAQTARSQMNFK       | 20 | 2798  | 0.99 | 0.25 | 26 |
| 22 | H14A12.2a;H14A12.2b                     | YGAQTARSQMNFK       | 52 | 3184  | 0.99 | 0.12 | 12 |
| 22 | H14A12.2a;H14A12.2b                     | ERDTFGELEVPADK      | 49 | 5580  | 0.99 | 0.22 | 22 |
| 22 | H14A12.2a;H14A12.2b                     | ERDTFGELEVPADK      | 66 | 5043  | 1.01 | 0.13 | 13 |
| 1  | H14A12.2a;H14A12.2b                     | YGAQTARSQMNFK       | 50 | 1947  | 1.03 | 0.20 | 19 |
| 1  | H14A12.2a;H14A12.2b                     | AAALVNTEFGLDK       | 33 | 656   | 1.04 | 0.17 | 16 |
| 7  | H14A12.2a;H14A12.2b                     | AAALVNTEFGLDK       | 39 | 1099  | 1.06 | 0.23 | 22 |
| 1  | H14A12.2a;H14A12.2b                     | AAALVNTEFGLDK       | 28 | 719   | 1.06 | 0.22 | 20 |
| 7  | H14A12.2a;H14A12.2b                     | ERDTFGELEVPADK      | 62 | 3498  | 1.09 | 0.09 | 8  |
| 7  | H14A12.2a;H14A12.2b                     | ERDTFGELEVPADK      | 49 | 4100  | 1.14 | 0.23 | 20 |
| 1  | H14A12.2a;H14A12.2b                     | ERDTFGELEVPADK      | 58 | 4160  | 1.16 | 0.22 | 19 |
| 22 | H14A12.2a;H14A12.2b                     | AAALVNTEFGLDK       | 52 | 1262  | 1.17 | 0.11 | 10 |
| 7  | H14A12.2a;H14A12.2b                     | LRTALHNK            | 10 | 7321  | 1.24 | 0.35 | 29 |
| 1  | H14A12.2a;H14A12.2b                     | ERDTFGELEVPADK      | 17 | 607   | 1.25 | 0.13 | 11 |
| 22 | H14A12.2a;H14A12.2b                     | YGAQTARSQMNFK       | 44 | 2512  | 1.25 | 0.09 | 7  |
| 22 | H14A12.2a;H14A12.2b                     | YGAQTARSQMNFK       | 39 | 1162  | 1.25 | 0.15 | 12 |
| 1  | H14A12.2a;H14A12.2b                     | AAALVNTEFGLDK       | 34 | 562   | 1.26 | 0.19 | 15 |
| 7  | H14A12.2a;H14A12.2b                     | ERDTFGELEVPADK      | 11 | 3862  | 1.29 | 0.19 | 15 |
| 1  | H14A12.2a;H14A12.2b                     | YGAQTARSQMNFK       | 47 | 1699  | 1.39 | 0.13 | 9  |
| 1  | H14A12.2a;H14A12.2b                     | AAALVNTEFGLDK       | 58 | 1595  | 1.44 | 0.15 | 10 |
| 7  | H14A12.2a;H14A12.2b                     | AAALVNTEFGLDK       | 46 | 1697  | 1.45 | 0.12 | 8  |
| 7  | H14A12.2a;H14A12.2b                     | YGAQTARSQMNFK       | 11 | 459   | 1.49 | 0.22 | 15 |
| 22 | H14A12.2a;H14A12.2b                     | AAALVNTEFGLDK       | 53 | 1947  | 1.54 | 0.14 | 9  |
| 7  | H14A12.2a;H14A12.2b                     | YGAQTARSQMNFK       | 13 | 364   | 1.66 | 0.15 | 9  |
| 22 | H14A12.2a;H14A12.2b                     | AAALVNTEFGLDK       | 51 | 1838  | 1.68 | 0.09 | 5  |
| 1  | H14A12.2a;H14A12.2b                     | AAALVNTEFGLDK       | 60 | 1053  | 1.69 | 0.19 | 11 |
| 1  | H14A12.2a;H14A12.2b                     | LRTALHNK            | 13 | 10158 | 1.81 | 0.26 | 14 |
| 7  | H14A12.2a;H14A12.2b                     | LRTALHNK            | 10 | 7138  | 2.01 | 0.37 | 19 |
| 7  | H14A12.2a;H14A12.2b                     | YGAQTARSQMNFK       | 55 | 1058  | 2.22 | 0.20 | 9  |
| 7  | H14A12.2a;H14A12.2b                     | AAALVNTEFGLDK       | 21 | 701   | 2.28 | 0.14 | 6  |
| 7  | H14A12.2a;H14A12.2b                     | YGAQTARSQMNFK       | 21 | 824   | 2.69 | 0.11 | 4  |
| 22 | H14A12.2a;H14A12.2b                     | AAALVNTEFGLDK       | 11 | 790   | 2.90 | 0.06 | 2  |
| 22 | H14E04.2a;H14E04.2b;H14E04.2c;H14E04.2d | GHLVVLTPK           | 27 | 3656  | 1.57 | 0.14 | 9  |
| 1  | H15N14.2a;H15N14.2b                     | ILDEGSLLAATVK       | 50 | 984   | 1.01 | 0.11 | 11 |
| 1  | H15N14.2a;H15N14.2b                     | ILDEGSLLAATVK       | 31 | 759   | 1.38 | 0.16 | 11 |
| 10 | H19M22.2b;H19M22.2a;H19M22.2d;H19M22.2c | LPTTSITVSK          | 11 | 3558  | 0.47 | 0.12 | 26 |
| 10 | H19N07.1                                | LTPFLRK             | 11 | 2294  | 0.18 | 0.14 | 80 |
| 1  | H19N07.1                                | LTPFLRK             | 11 | 1298  | 0.35 | 0.18 | 52 |
| 10 | H19N07.1                                | LTPFLRK             | 12 | 1261  | 0.41 | 0.08 | 19 |
| 1  | H19N07.1                                | LTPFLRK             | 23 | 1716  | 0.49 | 0.31 | 65 |
| 10 | H19N07.1                                | EHINMVFVGHVDAGK     | 20 | 2851  | 0.81 | 0.19 | 23 |
| 10 | H19N07.1                                | TVEVGRAYFETEK       | 40 | 3232  | 0.82 | 0.15 | 18 |
| 10 | H19N07.1                                | HLVILVNK            | 13 | 4517  | 0.87 | 0.12 | 14 |
| 10 | H19N07.1                                | HLVILVNK            | 46 | 6147  | 0.89 | 0.07 | 8  |
| 10 | H19N07.1                                | GDTLVVMPNK          | 13 | 2142  | 0.99 | 0.12 | 12 |
| 10 | H19N07.1                                | RHFTILDAPGHK        | 17 | 8676  | 1.03 | 0.17 | 16 |
| 10 | H19N07.1                                | HLVILVNK            | 13 | 3830  | 1.17 | 0.09 | 8  |
| 22 | H19N07.1                                | HLVILVNK            | 20 | 3211  | 1.21 | 0.12 | 10 |
| 1  | H19N07.1                                | GDTLVVMPNK          | 12 | 801   | 1.33 | 0.16 | 12 |
| 10 | H19N07.1                                | LTPFLRK             | 14 | 1128  | 1.34 | 0.36 | 27 |
| 10 | H19N07.1                                | RHFTILDAPGHK        | 13 | 17114 | 1.34 | 0.19 | 14 |
| 10 | H19N07.1                                | HLVILVNK            | 15 | 2947  | 1.35 | 0.05 | 4  |
| 10 | H19N07.1                                | RHFTILDAPGHK        | 15 | 10865 | 1.47 | 0.19 | 13 |
| 1  | H19N07.1                                | RHFTILDAPGHK        | 25 | 1739  | 1.48 | 0.24 | 17 |
| 10 | H19N07.1                                | RHFTILDAPGHK        | 11 | 12330 | 1.63 | 0.22 | 13 |
| 1  | H19N07.1                                | RHFTILDAPGHK        | 23 | 9687  | 1.71 | 0.20 | 12 |
| 22 | H19N07.1                                | HLVILVNK            | 22 | 5737  | 1.81 | 0.04 | 2  |
| 22 | H19N07.1                                | RHFTILDAPGHK        | 15 | 11473 | 1.91 | 0.17 | 9  |
| 22 | H19N07.1                                | HLVILVNK            | 24 | 6653  | 1.91 | 0.13 | 7  |
| 10 | H19N07.1                                | HLVILVNK            | 26 | 5720  | 2.05 | 0.12 | 6  |
| 10 | H19N07.1                                | HLVILVNK            | 14 | 3871  | 2.11 | 0.06 | 3  |
| 1  | H19N07.1                                | LTPFLRK             | 18 | 1522  | 2.36 | 0.40 | 17 |
| 1  | H19N07.1                                | HLVILVNK            | 47 | 5601  | 3.54 | 0.09 | 3  |
| 1  | H19N07.1                                | HLVILVNK            | 43 | 4067  | 3.54 | 0.11 | 3  |
| 1  | H19N07.1                                | LTPFLRK             | 12 | 1687  | 4.27 | 0.59 | 14 |
| 10 | H19N07.1                                | HLVILVNK            | 34 | 3970  | 4.85 | 0.18 | 4  |
| 10 | H19N07.1                                | HLVILVNK            | 30 | 5383  | 4.88 | 0.12 | 2  |
| 10 | H19N07.1                                | HLVILVNK            | 40 | 7013  | 5.78 | 0.14 | 2  |
| 10 | H19N07.2a;H19N07.2b;H19N07.2c           | RYYPFVEGGSGK        | 32 | 1486  | 1.36 | 0.10 | 7  |
| 10 | H19N07.2a;H19N07.2b;H19N07.2c           | RYYPFVEGGSGK        | 30 | 1343  | 1.39 | 0.16 | 12 |
| 22 | H19N07.2c;H19N07.2a;H19N07.2b           | RYYPFVEGGSGK        | 17 | 598   | 2.17 | 0.12 | 5  |
| 22 | H22K11.1                                | NQGLACATSEPGITFVAAK | 25 | 1106  | 0.95 | 0.43 | 45 |
| 1  | H22K11.1                                | NQGLACATSEPGITFVAAK | 22 | 1421  | 0.99 | 0.19 | 19 |

|                                 |                      |    |       |      |      |     |
|---------------------------------|----------------------|----|-------|------|------|-----|
| 1 H22K11.1                      | NQGLACATSEPGITFVAAK  | 15 | 1286  | 1.00 | 0.14 | 14  |
| 1 H22K11.1                      | RVGFATSRTGK          | 26 | 2026  | 1.01 | 0.16 | 16  |
| 22 H22K11.1                     | NQGLACATSEPGITFVAAK  | 18 | 2814  | 1.97 | 0.11 | 5   |
| 22 H22K11.1                     | RVGFATSRTGK          | 18 | 12521 | 2.37 | 0.21 | 9   |
| 10 H27M09.2                     | AELLARYK             | 36 | 14442 | 0.65 | 0.25 | 38  |
| 7 H28G03.6                      | MEELDYLK             | 16 | 1772  | 1.41 | 0.21 | 15  |
| 7 H28O16.1a;H28O16.1c;H28O16.1b | TAIAIDTIINQK         | 64 | 2354  | 0.84 | 0.04 | 5   |
| 7 H28O16.1a;H28O16.1c;H28O16.1b | HALIIFDDLSK          | 14 | 632   | 0.91 | 0.12 | 13  |
| 7 H28O16.1a;H28O16.1c;H28O16.1b | TAIAIDTIINQK         | 68 | 2291  | 0.99 | 0.11 | 11  |
| 7 H28O16.1a;H28O16.1c;H28O16.1b | VIREGDIVK            | 15 | 2666  | 1.16 | 0.23 | 19  |
| 7 H28O16.1a;H28O16.1c;H28O16.1b | RSTVAQIVK            | 17 | 5506  | 1.22 | 0.27 | 22  |
| 7 H28O16.1a;H28O16.1c;H28O16.1b | TAIAIDTIINQK         | 52 | 2433  | 1.37 | 0.16 | 12  |
| 7 H28O16.1a;H28O16.1c;H28O16.1b | TAIAIDTIINQK         | 68 | 1593  | 1.48 | 0.10 | 7   |
| 7 H28O16.1a;H28O16.1c;H28O16.1b | TAIAIDTIINQK         | 48 | 1506  | 1.60 | 0.10 | 7   |
| 7 H28O16.1a;H28O16.1c;H28O16.1b | TAIAIDTIINQK         | 15 | 1427  | 1.72 | 0.10 | 6   |
| 7 H28O16.1a;H28O16.1c;H28O16.1b | TAIAIDTIINQK         | 71 | 2198  | 1.73 | 0.12 | 7   |
| 7 H28O16.1a;H28O16.1c;H28O16.1b | HALIIFDDLSK          | 78 | 3978  | 1.86 | 0.14 | 7   |
| 7 H28O16.1a;H28O16.1c;H28O16.1b | HALIIFDDLSK          | 63 | 4184  | 1.91 | 0.11 | 6   |
| 7 H28O16.1a;H28O16.1c;H28O16.1b | HALIIFDDLSK          | 37 | 2106  | 2.10 | 0.12 | 6   |
| 7 H28O16.1a;H28O16.1c;H28O16.1b | HALIIFDDLSK          | 99 | 5422  | 2.16 | 0.11 | 5   |
| 7 H28O16.1a;H28O16.1c;H28O16.1b | HALIIFDDLSK          | 55 | 3480  | 2.25 | 0.11 | 5   |
| 7 H28O16.1a;H28O16.1c;H28O16.1b | HALIIFDDLSK          | 43 | 2855  | 2.74 | 0.12 | 4   |
| 7 H28O16.1a;H28O16.1c;H28O16.1b | HALIIFDDLSK          | 65 | 3048  | 2.77 | 0.13 | 5   |
| 7 H28O16.1a;H28O16.1c;H28O16.1b | HALIIFDDLSK          | 24 | 1181  | 2.98 | 0.18 | 6   |
| 7 H28O16.1a;H28O16.1c;H28O16.1b | HALIIFDDLSK          | 49 | 2269  | 3.03 | 0.15 | 5   |
| 7 H28O16.1a;H28O16.1c;H28O16.1b | HALIIFDDLSK          | 27 | 1039  | 3.08 | 0.13 | 4   |
| 7 H28O16.1a;H28O16.1c;H28O16.1b | HALIIFDDLSK          | 52 | 2456  | 3.21 | 0.06 | 2   |
| 7 H28O16.1a;H28O16.1c;H28O16.1b | HALIIFDDLSK          | 31 | 1122  | 4.42 | 0.06 | 1   |
| 22 H28O16.1d                    | TAIAIDTIINQK         | 78 | 3054  | 0.18 | 0.32 | 177 |
| 22 H28O16.1d                    | EFLAHLRSSQQALLK      | 14 | 3110  | 0.25 | 0.18 | 72  |
| 22 H28O16.1d                    | EFLAHLRSSQQALLK      | 21 | 15530 | 0.26 | 0.15 | 57  |
| 22 H28O16.1d                    | TAIAIDTIINQK         | 57 | 2442  | 0.26 | 0.21 | 78  |
| 22 H28O16.1d                    | VLSIGDGIARVYGLK      | 54 | 2463  | 0.30 | 0.11 | 37  |
| 22 H28O16.1d                    | ILEERILGTETGINLEETGK | 57 | 4026  | 0.31 | 0.20 | 66  |
| 22 H28O16.1d                    | TIREEGQISQQTDAQLK    | 16 | 4566  | 0.38 | 0.14 | 37  |
| 22 H28O16.1d                    | VLSIGDGIARVYGLK      | 32 | 2133  | 0.43 | 0.23 | 53  |
| 22 H28O16.1d                    | ILEERILGTETGINLEETGK | 54 | 3808  | 0.44 | 0.23 | 53  |
| 22 H28O16.1d                    | VIREGDIVK            | 12 | 9519  | 0.46 | 0.17 | 37  |
| 10 H28O16.1d                    | EFLAHLRSSQQALLK      | 13 | 3835  | 0.51 | 0.12 | 23  |
| 22 H28O16.1d                    | HALIIFDDLSK          | 66 | 3227  | 0.58 | 0.15 | 25  |
| 22 H28O16.1d                    | HALIIFDDLSK          | 76 | 4409  | 0.65 | 0.13 | 19  |
| 22 H28O16.1d                    | TAIAIDTIINQK         | 13 | 563   | 0.70 | 0.35 | 51  |
| 10 H28O16.1d                    | EFLAHLRSSQQALLK      | 12 | 4032  | 0.74 | 0.37 | 50  |
| 10 H28O16.1d                    | TAIAIDTIINQK         | 84 | 3947  | 0.76 | 0.10 | 13  |
| 10 H28O16.1d                    | TAIAIDTIINQK         | 63 | 2193  | 0.80 | 0.12 | 15  |
| 22 H28O16.1d                    | TAIAIDTIINQK         | 82 | 2953  | 0.82 | 0.14 | 17  |
| 22 H28O16.1d                    | TAIAIDTIINQK         | 56 | 1862  | 0.88 | 0.13 | 15  |
| 22 H28O16.1d                    | TAIAIDTIINQK         | 64 | 1973  | 0.90 | 0.12 | 13  |
| 10 H28O16.1d                    | VLSIGDGIARVYGLK      | 32 | 2985  | 0.95 | 0.22 | 23  |
| 22 H28O16.1d                    | TAIAIDTIINQK         | 37 | 1208  | 0.96 | 0.20 | 21  |
| 22 H28O16.1d                    | TAIAIDTIINQK         | 68 | 2642  | 0.99 | 0.24 | 24  |
| 10 H28O16.1d                    | RSTVAQIVK            | 43 | 11755 | 1.00 | 0.27 | 27  |
| 10 H28O16.1d                    | TAIAIDTIINQK         | 72 | 2491  | 1.06 | 0.10 | 10  |
| 22 H28O16.1d                    | VLSIGDGIARVYGLK      | 16 | 1028  | 1.08 | 0.14 | 13  |
| 22 H28O16.1d                    | ILEERILGTETGINLEETGK | 23 | 2901  | 1.13 | 0.21 | 19  |
| 22 H28O16.1d                    | HALIIFDDLSK          | 70 | 3780  | 1.15 | 0.06 | 5   |
| 10 H28O16.1d                    | VLSIGDGIARVYGLK      | 14 | 906   | 1.15 | 0.09 | 8   |
| 10 H28O16.1d                    | EFLAHLRSSQQALLK      | 16 | 7755  | 1.16 | 0.20 | 17  |
| 10 H28O16.1d                    | TAIAIDTIINQK         | 31 | 1760  | 1.17 | 0.09 | 8   |
| 10 H28O16.1d                    | TAIAIDTIINQK         | 32 | 2457  | 1.17 | 0.12 | 10  |
| 10 H28O16.1d                    | ILEERILGTETGINLEETGK | 36 | 2810  | 1.18 | 0.17 | 14  |
| 22 H28O16.1d                    | HALIIFDDLSK          | 58 | 3311  | 1.20 | 0.13 | 11  |
| 10 H28O16.1d                    | EFLAHLRSSQQALLK      | 12 | 5559  | 1.23 | 0.07 | 6   |
| 22 H28O16.1d                    | TAIAIDTIINQK         | 56 | 2607  | 1.25 | 0.08 | 6   |
| 22 H28O16.1d                    | HALIIFDDLSK          | 77 | 2915  | 1.30 | 0.16 | 12  |
| 10 H28O16.1d                    | VIREGDIVK            | 11 | 6088  | 1.33 | 0.22 | 16  |
| 22 H28O16.1d                    | HALIIFDDLSK          | 53 | 2910  | 1.35 | 0.16 | 12  |
| 22 H28O16.1d                    | RSTVAQIVK            | 33 | 4617  | 1.38 | 0.27 | 20  |
| 10 H28O16.1d                    | VLSIGDGIARVYGLK      | 11 | 3030  | 1.40 | 0.15 | 10  |
| 22 H28O16.1d                    | VIREGDIVK            | 13 | 3882  | 1.45 | 0.15 | 10  |
| 10 H28O16.1d                    | HALIIFDDLSK          | 72 | 3941  | 1.47 | 0.10 | 7   |
| 22 H28O16.1d                    | HALIIFDDLSK          | 32 | 1380  | 1.48 | 0.08 | 6   |
| 22 H28O16.1d                    | HALIIFDDLSK          | 33 | 1926  | 1.49 | 0.07 | 5   |
| 10 H28O16.1d                    | HALIIFDDLSK          | 71 | 3582  | 1.50 | 0.08 | 5   |
| 10 H28O16.1d                    | HALIIFDDLSK          | 26 | 1126  | 1.51 | 0.13 | 9   |
| 22 H28O16.1d                    | TAIAIDTIINQK         | 58 | 2386  | 1.51 | 0.08 | 6   |
| 22 H28O16.1d                    | HALIIFDDLSK          | 19 | 815   | 1.54 | 0.27 | 17  |
| 10 H28O16.1d                    | TAIAIDTIINQK         | 79 | 2257  | 1.62 | 0.12 | 7   |
| 10 H28O16.1d                    | HALIIFDDLSK          | 86 | 5681  | 1.64 | 0.13 | 8   |
| 22 H28O16.1d                    | HALIIFDDLSK          | 38 | 2398  | 1.65 | 0.08 | 5   |
| 22 H28O16.1d                    | EFLAHLRSSQQALLK      | 10 | 8500  | 1.67 | 0.14 | 8   |
| 22 H28O16.1d                    | HALIIFDDLSK          | 45 | 2574  | 1.70 | 0.12 | 7   |
| 10 H28O16.1d                    | TAIAIDTIINQK         | 57 | 2936  | 1.71 | 0.10 | 6   |
| 22 H28O16.1d                    | RSTVAQIVK            | 33 | 11878 | 1.76 | 0.13 | 8   |
| 22 H28O16.1d                    | HALIIFDDLSK          | 73 | 4144  | 1.79 | 0.12 | 7   |
| 10 H28O16.1d                    | HALIIFDDLSK          | 42 | 3924  | 1.81 | 0.11 | 6   |
| 22 H28O16.1d                    | RSTVAQIVK            | 41 | 8642  | 1.82 | 0.14 | 7   |
| 22 H28O16.1d                    | HALIIFDDLSK          | 68 | 5251  | 1.85 | 0.12 | 6   |
| 10 H28O16.1d                    | HALIIFDDLSK          | 62 | 4353  | 1.85 | 0.08 | 4   |
| 22 H28O16.1d                    | RSTVAQIVK            | 36 | 11727 | 1.87 | 0.11 | 6   |
| 10 H28O16.1d                    | HALIIFDDLSK          | 70 | 4774  | 1.90 | 0.12 | 6   |
| 22 H28O16.1d                    | HALIIFDDLSK          | 21 | 1991  | 1.95 | 0.09 | 5   |
| 10 H28O16.1d                    | HALIIFDDLSK          | 17 | 1255  | 1.99 | 0.17 | 8   |
| 10 H28O16.1d                    | HALIIFDDLSK          | 70 | 3996  | 2.09 | 0.14 | 6   |
| 22 H28O16.1d                    | HALIIFDDLSK          | 65 | 3394  | 2.15 | 0.08 | 4   |
| 10 H28O16.1d                    | HALIIFDDLSK          | 50 | 2711  | 2.17 | 0.08 | 4   |
| 10 H28O16.1d                    | HALIIFDDLSK          | 67 | 4965  | 2.19 | 0.11 | 5   |
| 10 H28O16.1d                    | HALIIFDDLSK          | 20 | 2209  | 2.24 | 0.12 | 5   |
| 10 H28O16.1d                    | HALIIFDDLSK          | 31 | 4482  | 2.38 | 0.04 | 2   |
| 10 H28O16.1d                    | HALIIFDDLSK          | 74 | 2782  | 2.40 | 0.17 | 7   |
| 10 H28O16.1d                    | HALIIFDDLSK          | 48 | 2376  | 2.49 | 0.16 | 6   |

|                                  |                       |    |       |       |      |     |
|----------------------------------|-----------------------|----|-------|-------|------|-----|
| 22 H28O16.1d                     | RSTVAQIVK             | 35 | 10529 | 2.80  | 0.09 | 3   |
| 10 H28O16.1d                     | HALIIFDDLSK           | 68 | 3582  | 2.92  | 0.08 | 3   |
| 22 H28O16.1d                     | HALIIFDDLSK           | 47 | 4082  | 3.20  | 0.05 | 2   |
| 22 H28O16.1d                     | HALIIFDDLSK           | 73 | 3298  | 3.28  | 0.17 | 5   |
| 10 H28O16.1d                     | HALIIFDDLSK           | 71 | 2805  | 3.31  | 0.18 | 5   |
| 10 H28O16.1d                     | HALIIFDDLSK           | 67 | 2240  | 3.43  | 0.16 | 5   |
| 22 H28O16.1d                     | HALIIFDDLSK           | 60 | 3287  | 3.56  | 0.17 | 5   |
| 22 H28O16.1d                     | HALIIFDDLSK           | 76 | 3555  | 4.06  | 0.10 | 3   |
| 10 H28O16.1d                     | HALIIFDDLSK           | 45 | 2569  | 17.34 | 0.48 | 3   |
| 10 H28O16.1d                     | HALIIFDDLSK           | 69 | 3213  | 23.57 | 0.46 | 2   |
| 1 H28O16.1d;H28O16.1a            | TAIAIDTIINQK          | 79 | 1789  | 0.47  | 0.14 | 30  |
| 1 H28O16.1d;H28O16.1a            | TAIAIDTIINQK          | 37 | 676   | 0.47  | 0.08 | 16  |
| 1 H28O16.1d;H28O16.1a            | VIREGDIVK             | 13 | 2511  | 0.59  | 0.11 | 18  |
| 1 H28O16.1d;H28O16.1a            | HALIIFDDLSK           | 58 | 2078  | 0.61  | 0.12 | 20  |
| 1 H28O16.1d;H28O16.1a            | TAIAIDTIINQK          | 35 | 880   | 0.69  | 0.13 | 19  |
| 1 H28O16.1d;H28O16.1a            | HALIIFDDLSK           | 55 | 1821  | 0.69  | 0.10 | 15  |
| 1 H28O16.1d;H28O16.1a            | HALIIFDDLSK           | 70 | 2440  | 0.70  | 0.11 | 15  |
| 1 H28O16.1d;H28O16.1a            | HALIIFDDLSK           | 63 | 2923  | 0.75  | 0.10 | 13  |
| 1 H28O16.1d;H28O16.1a            | TAIAIDTIINQK          | 20 | 701   | 0.78  | 0.18 | 24  |
| 1 H28O16.1d;H28O16.1a            | HALIIFDDLSK           | 73 | 2400  | 0.78  | 0.10 | 13  |
| 1 H28O16.1d;H28O16.1a            | TAIAIDTIINQK          | 42 | 686   | 0.83  | 0.15 | 18  |
| 1 H28O16.1d;H28O16.1a            | HALIIFDDLSK           | 55 | 1893  | 0.84  | 0.17 | 20  |
| 1 H28O16.1d;H28O16.1a            | HALIIFDDLSK           | 47 | 1079  | 0.87  | 0.09 | 11  |
| 1 H28O16.1d;H28O16.1a            | TAIAIDTIINQK          | 46 | 2028  | 0.92  | 0.25 | 28  |
| 1 H28O16.1d;H28O16.1a            | HALIIFDDLSK           | 35 | 1231  | 0.95  | 0.13 | 14  |
| 1 H28O16.1d;H28O16.1a            | HALIIFDDLSK           | 72 | 3131  | 0.95  | 0.21 | 22  |
| 1 H28O16.1d;H28O16.1a            | HALIIFDDLSK           | 69 | 2839  | 1.21  | 0.10 | 8   |
| 1 H28O16.1d;H28O16.1a            | HALIIFDDLSK           | 65 | 4219  | 1.33  | 0.13 | 10  |
| 1 H28O16.1d;H28O16.1a            | HALIIFDDLSK           | 41 | 2900  | 1.35  | 0.15 | 11  |
| 1 H28O16.1d;H28O16.1a            | HALIIFDDLSK           | 61 | 3135  | 1.38  | 0.09 | 7   |
| 1 H28O16.1d;H28O16.1a            | HALIIFDDLSK           | 44 | 2147  | 1.89  | 0.11 | 6   |
| 1 H28O16.1d;H28O16.1a            | HALIIFDDLSK           | 44 | 1905  | 2.18  | 0.16 | 8   |
| 22 H34C03.2                      | LPEILHLK              | 10 | 624   | 0.50  | 0.18 | 37  |
| 10 H34C03.2                      | LPEILHLK              | 20 | 828   | 1.53  | 0.36 | 23  |
| 10 H34C03.2                      | LPEILHLK              | 11 | 917   | 1.80  | 0.23 | 13  |
| 22 H34C03.2                      | HFFINPK               | 15 | 4030  | 2.04  | 0.16 | 8   |
| 22 JC8.3a                        | HNGDLTVDTIHK          | 55 | 8460  | 0.10  | 0.22 | 227 |
| 22 JC8.3a                        | HNGDLTVDTIHK          | 55 | 6307  | 0.11  | 0.36 | 320 |
| 1 JC8.3a                         | LTIQNRVAK             | 28 | 2959  | 0.16  | 0.10 | 63  |
| 7 JC8.3a                         | HNGDLTVDTIHK          | 56 | 6091  | 0.17  | 0.21 | 125 |
| 10 JC8.3a                        | HNGDLTVDTIHK          | 80 | 9915  | 0.18  | 0.46 | 264 |
| 7 JC8.3a                         | HNGDLTVDTIHK          | 31 | 5358  | 0.23  | 0.22 | 95  |
| 7 JC8.3a                         | IDVVP5AASLIVK         | 25 | 2451  | 0.23  | 0.22 | 94  |
| 10 JC8.3a                        | LTIQNRVAK             | 26 | 3666  | 0.33  | 0.32 | 99  |
| 22 K01C8.10                      | IGLIQFQISPPK          | 12 | 1069  | 0.56  | 0.19 | 33  |
| 22 K01C8.10                      | VTGVQNP5HAVSILLRGSNK  | 12 | 4147  | 0.61  | 0.27 | 44  |
| 10 K01C8.10                      | VTGVQNP5HAVSILLRGSNK  | 15 | 4985  | 0.73  | 0.41 | 55  |
| 22 K01C8.10                      | GIHPTTISESFQ5AAAAEAK  | 44 | 4388  | 0.96  | 0.13 | 14  |
| 22 K01C8.10                      | IGLIQFQISPPK          | 29 | 1284  | 0.97  | 0.09 | 9   |
| 1 K01C8.10                       | GIHPTTISESFQ5AAAAEAK  | 41 | 4137  | 1.10  | 0.12 | 10  |
| 10 K01C8.10                      | GIHPTTISESFQ5AAAAEAK  | 62 | 6172  | 1.28  | 0.13 | 10  |
| 7 K01C8.10                       | GIHPTTISESFQ5AAAAEAK  | 41 | 2489  | 1.35  | 0.11 | 8   |
| 22 K01C8.10                      | GIHPTTISESFQ5AAAAEAK  | 45 | 3100  | 1.42  | 0.14 | 10  |
| 1 K01C8.10                       | GIHPTTISESFQ5AAAAEAK  | 51 | 4095  | 1.48  | 0.15 | 10  |
| 10 K01C8.10                      | GIHPTTISESFQ5AAAAEAK  | 50 | 4105  | 1.52  | 0.11 | 7   |
| 10 K01C8.10                      | VTGVQNP5HAVSILLRGSNK  | 11 | 3271  | 3.63  | 0.26 | 7   |
| 10 K01G5.4                       | LVLVGDGGTGK           | 75 | 10769 | 0.60  | 0.15 | 26  |
| 10 K01G5.4                       | LVLVGDGGTGK           | 75 | 16989 | 0.62  | 0.14 | 23  |
| 1 K01G5.4                        | LVLVGDGGTGK           | 40 | 1403  | 0.78  | 0.30 | 38  |
| 1 K01G5.4                        | LVLVGDGGTGK           | 49 | 1847  | 0.83  | 0.16 | 19  |
| 22 K01G5.4                       | LVLVGDGGTGK           | 87 | 17776 | 0.87  | 0.14 | 16  |
| 22 K01G5.4                       | LVLVGDGGTGK           | 80 | 16434 | 0.94  | 0.18 | 19  |
| 10 K01G5.4                       | RHLTGEFEK             | 11 | 3707  | 0.98  | 0.12 | 12  |
| 10 K01G5.4                       | LVLVGDGGTGK           | 21 | 1720  | 1.01  | 0.18 | 17  |
| 10 K01G5.4                       | LVLVGDGGTGK           | 19 | 1848  | 1.49  | 0.31 | 21  |
| 7 K01G5.4                        | LVLVGDGGTGK           | 65 | 3407  | 1.64  | 0.13 | 8   |
| 1 K01G5.4                        | RHLTGEFEK             | 11 | 2910  | 1.77  | 0.04 | 2   |
| 1 K01G5.4                        | NLQYYDISAK            | 21 | 1268  | 2.04  | 0.20 | 10  |
| 10 K01G5.4                       | LVLVGDGGTGK           | 25 | 2389  | 2.16  | 0.13 | 6   |
| 10 K01G5.4                       | RHLTGEFEK             | 14 | 3146  | 2.29  | 0.24 | 10  |
| 7 K01G5.4                        | RHLTGEFEK             | 20 | 5906  | 2.67  | 0.14 | 5   |
| 22 K01G5.4                       | RHLTGEFEK             | 19 | 3758  | 3.51  | 0.12 | 4   |
| 22 K01G5.4                       | RHLTGEFEK             | 14 | 6549  | 3.74  | 0.06 | 2   |
| 22 K01G5.4                       | RHLTGEFEK             | 29 | 19783 | 5.09  | 0.10 | 2   |
| 22 K01G5.4                       | RHLTGEFEK             | 16 | 4750  | 6.79  | 0.10 | 1   |
| 22 K01G5.7                       | GAQAYRALTVAELTQQMFDAK | 47 | 3962  | 0.43  | 0.06 | 14  |
| 22 K01G5.7                       | GAQAYRALTVAELTQQMFDAK | 42 | 3995  | 0.59  | 0.15 | 25  |
| 22 K01G5.7                       | GAQAYRALTVAELTQQMFDAK | 45 | 3412  | 0.65  | 0.11 | 17  |
| 22 K01G5.7                       | GAQAYRALTVAELTQQMFDAK | 56 | 4385  | 0.67  | 0.21 | 32  |
| 22 K01G5.7                       | GAQAYRALTVAELTQQMFDAK | 63 | 4275  | 0.67  | 0.16 | 24  |
| 22 K01G5.7                       | GAQAYRALTVAELTQQMFDAK | 30 | 2944  | 0.71  | 0.22 | 31  |
| 22 K01G5.7                       | GAQAYRALTVAELTQQMFDAK | 30 | 1736  | 0.99  | 0.12 | 12  |
| 10 K01G5.7                       | GAQAYRALTVAELTQQMFDAK | 36 | 2058  | 1.05  | 0.08 | 8   |
| 22 K01G5.7                       | GAQAYRALTVAELTQQMFDAK | 49 | 3295  | 1.06  | 0.18 | 17  |
| 10 K01G5.7                       | GAQAYRALTVAELTQQMFDAK | 39 | 3063  | 1.31  | 0.12 | 9   |
| 10 K01G5.7                       | GAQAYRALTVAELTQQMFDAK | 27 | 3577  | 1.47  | 0.09 | 6   |
| 22 K01G5.7                       | GAQAYRALTVAELTQQMFDAK | 39 | 2735  | 1.49  | 0.11 | 7   |
| 7 K01G5.7                        | GAQAYRALTVAELTQQMFDAK | 29 | 2270  | 1.53  | 0.16 | 10  |
| 10 K01G5.7                       | GAQAYRALTVAELTQQMFDAK | 38 | 2893  | 1.57  | 0.09 | 6   |
| 7 K01G5.7                        | GAQAYRALTVAELTQQMFDAK | 56 | 3813  | 1.68  | 0.11 | 7   |
| 10 K01G5.7                       | GAQAYRALTVAELTQQMFDAK | 38 | 3966  | 1.69  | 0.09 | 6   |
| 10 K01G5.7                       | GAQAYRALTVAELTQQMFDAK | 36 | 3971  | 1.84  | 0.16 | 9   |
| 10 K01G5.7                       | GAQAYRALTVAELTQQMFDAK | 35 | 4049  | 1.95  | 0.04 | 2   |
| 7 K01G5.7                        | GAQAYRALTVAELTQQMFDAK | 44 | 2551  | 2.94  | 0.21 | 7   |
| 7 K01G5.7                        | GAQAYRALTVAELTQQMFDAK | 26 | 2079  | 3.23  | 0.21 | 6   |
| 7 K01G5.7                        | GAQAYRALTVAELTQQMFDAK | 67 | 2954  | 3.65  | 0.42 | 12  |
| 1 K01G5.7                        | GAQAYRALTVAELTQQMFDAK | 40 | 2236  | 3.70  | 0.21 | 6   |
| 22 K02A4.1                       | VLHYASELFEGMK         | 32 | 1199  | 0.37  | 0.16 | 43  |
| 22 K02D10.1a;K02D10.1b;K02D10.1c | GYEDVDSSISLHGK        | 63 | 6788  | 0.54  | 0.15 | 28  |
| 22 K02D10.1a;K02D10.1b;K02D10.1c | GYEDVDSSISLHGK        | 87 | 8534  | 0.64  | 0.12 | 18  |
| 7 K02D10.1a;K02D10.1b;K02D10.1c  | GYEDVDSSISLHGK        | 61 | 12878 | 0.88  | 0.07 | 8   |

|                                  |                          |     |       |      |      |     |
|----------------------------------|--------------------------|-----|-------|------|------|-----|
| 1 K02D10.1a;K02D10.1b;K02D10.1c  | GYEDVDSSISLHGK           | 50  | 2703  | 0.89 | 0.18 | 20  |
| 7 K02D10.1a;K02D10.1b;K02D10.1c  | GYEDVDSSISLHGK           | 76  | 15018 | 0.95 | 0.13 | 14  |
| 22 K02D10.1a;K02D10.1b;K02D10.1c | GYEDVDSSISLHGK           | 77  | 9931  | 0.99 | 0.08 | 8   |
| 10 K02D10.1a;K02D10.1b;K02D10.1c | GYEDVDSSISLHGK           | 65  | 11935 | 1.02 | 0.08 | 8   |
| 10 K02D10.1a;K02D10.1b;K02D10.1c | GYEDVDSSISLHGK           | 86  | 15346 | 1.05 | 0.11 | 10  |
| 22 K02D10.1a;K02D10.1b;K02D10.1c | GYEDVDSSISLHGK           | 70  | 6438  | 1.14 | 0.15 | 13  |
| 1 K02D10.1a;K02D10.1b;K02D10.1c  | GYEDVDSSISLHGK           | 76  | 10698 | 1.20 | 0.09 | 7   |
| 1 K02D10.1a;K02D10.1b;K02D10.1c  | GYEDVDSSISLHGK           | 75  | 13119 | 1.25 | 0.11 | 9   |
| 10 K02D10.1a;K02D10.1b;K02D10.1c | QGWISRLLK                | 19  | 1496  | 1.36 | 0.07 | 5   |
| 22 K02D7.4                       | NLYETQLTHK               | 55  | 3026  | 0.05 | 0.08 | 185 |
| 22 K02D7.4                       | NLYETQLTHK               | 49  | 2993  | 0.07 | 0.16 | 230 |
| 22 K02D7.4                       | VANTIATVLNK              | 38  | 962   | 0.38 | 0.36 | 94  |
| 10 K02D7.4                       | AALNVILAASK              | 66  | 1300  | 0.41 | 0.20 | 48  |
| 22 K02D7.4                       | AALNVILAASK              | 59  | 1093  | 0.42 | 0.19 | 44  |
| 22 K02D7.4                       | AALNVILAASK              | 27  | 865   | 0.50 | 0.12 | 24  |
| 10 K02D7.4                       | VANTIATVLNK              | 38  | 779   | 0.57 | 0.15 | 27  |
| 22 K02D7.4                       | LYEHVK                   | 23  | 4085  | 0.61 | 0.46 | 76  |
| 1 K02D7.4                        | VANTIATVLNK              | 41  | 932   | 0.64 | 0.17 | 26  |
| 10 K02D7.4                       | AALNVILAASK              | 58  | 1216  | 0.71 | 0.13 | 18  |
| 1 K02D7.4                        | VANTIATVLNK              | 27  | 668   | 0.74 | 0.12 | 16  |
| 1 K02D7.4                        | AALNVILAASK              | 23  | 324   | 0.76 | 0.16 | 21  |
| 22 K02D7.4                       | VANTIATVLNK              | 59  | 2130  | 0.79 | 0.10 | 13  |
| 7 K02D7.4                        | VANTIATVLNK              | 47  | 2324  | 0.79 | 0.17 | 22  |
| 10 K02D7.4                       | AALNVILAASK              | 64  | 1307  | 0.80 | 0.13 | 16  |
| 10 K02D7.4                       | AALNVILAASK              | 75  | 1348  | 0.80 | 0.12 | 16  |
| 22 K02D7.4                       | LYEHVK                   | 30  | 3831  | 0.82 | 0.49 | 59  |
| 10 K02D7.4                       | VANTIATVLNK              | 23  | 567   | 0.83 | 0.29 | 35  |
| 22 K02D7.4                       | AALNVILAASK              | 69  | 1226  | 0.83 | 0.10 | 12  |
| 7 K02D7.4                        | HSLLYSQAQEARLAK          | 15  | 5775  | 0.88 | 0.23 | 26  |
| 22 K02D7.4                       | VANTIATVLNK              | 63  | 2069  | 0.89 | 0.06 | 7   |
| 1 K02D7.4                        | AALNVILAASK              | 25  | 423   | 0.90 | 0.19 | 21  |
| 22 K02D7.4                       | AALNVILAASK              | 76  | 1363  | 0.91 | 0.14 | 16  |
| 22 K02D7.4                       | VANTIATVLNK              | 33  | 1086  | 0.91 | 0.12 | 13  |
| 1 K02D7.4                        | CAEQAFGAVRVGGK           | 20  | 454   | 0.98 | 0.13 | 13  |
| 10 K02D7.4                       | VANTIATVLNK              | 68  | 1142  | 0.98 | 0.15 | 16  |
| 7 K02D7.4                        | VANTIATVLNK              | 41  | 2828  | 0.98 | 0.17 | 17  |
| 10 K02D7.4                       | NLYETQLTHK               | 44  | 2922  | 0.99 | 0.10 | 10  |
| 1 K02D7.4                        | VANTIATVLNK              | 13  | 410   | 1.00 | 0.09 | 9   |
| 10 K02D7.4                       | VANTIATVLNK              | 17  | 795   | 1.00 | 0.12 | 12  |
| 10 K02D7.4                       | AALNVILAASK              | 84  | 1060  | 1.03 | 0.14 | 13  |
| 22 K02D7.4                       | VANTIATVLNK              | 57  | 1849  | 1.04 | 0.17 | 16  |
| 7 K02D7.4                        | AALNVILAASK              | 61  | 2542  | 1.04 | 0.13 | 13  |
| 22 K02D7.4                       | AALNVILAASK              | 54  | 1228  | 1.08 | 0.11 | 10  |
| 7 K02D7.4                        | AALNVILAASK              | 55  | 1931  | 1.10 | 0.18 | 16  |
| 1 K02D7.4                        | TVVQDQIGK                | 14  | 575   | 1.12 | 0.23 | 21  |
| 10 K02D7.4                       | AALNVILAASK              | 56  | 890   | 1.14 | 0.08 | 7   |
| 10 K02D7.4                       | NLYETQLTHK               | 29  | 2218  | 1.19 | 0.10 | 9   |
| 22 K02D7.4                       | NLYETQLTHK               | 25  | 2910  | 1.22 | 0.14 | 12  |
| 10 K02D7.4                       | NLYETQLTHK               | 38  | 4475  | 1.26 | 0.14 | 11  |
| 1 K02D7.4                        | WHYLYK                   | 11  | 1275  | 1.27 | 0.19 | 15  |
| 10 K02D7.4                       | VANTIATVLNK              | 41  | 1202  | 1.28 | 0.15 | 12  |
| 22 K02D7.4                       | AALNVILAASK              | 76  | 1571  | 1.34 | 0.11 | 8   |
| 1 K02D7.4                        | NLYETQLTHK               | 19  | 1009  | 1.34 | 0.15 | 11  |
| 1 K02D7.4                        | AALNVILAASK              | 23  | 551   | 1.37 | 0.11 | 8   |
| 1 K02D7.4                        | AALNVILAASK              | 36  | 456   | 1.49 | 0.20 | 13  |
| 1 K02D7.4                        | CAEQAFGAVRVGGK           | 19  | 463   | 1.60 | 0.24 | 15  |
| 22 K02D7.4                       | VANTIATVLNK              | 63  | 1351  | 1.61 | 0.24 | 15  |
| 22 K02D7.4                       | WHYLYK                   | 11  | 630   | 1.68 | 0.15 | 9   |
| 22 K02D7.4                       | NLYETQLTHK               | 33  | 4815  | 1.69 | 0.20 | 12  |
| 22 K02D7.4                       | VANTIATVLNK              | 59  | 1774  | 1.72 | 0.16 | 9   |
| 1 K02D7.4                        | NLYETQLTHK               | 15  | 810   | 1.80 | 0.18 | 10  |
| 10 K02D7.4                       | CAEQAFGAVRVGGK           | 40  | 1272  | 1.85 | 0.16 | 8   |
| 10 K02D7.4                       | CAEQAFGAVRVGGK           | 60  | 2000  | 1.86 | 0.13 | 7   |
| 22 K02D7.4                       | NLYETQLTHK               | 36  | 4169  | 1.99 | 0.23 | 11  |
| 10 K02D7.4                       | CAEQAFGAVRVGGK           | 24  | 1407  | 2.02 | 0.13 | 6   |
| 10 K02D7.4                       | NLYETQLTHK               | 42  | 3293  | 2.11 | 0.12 | 6   |
| 22 K02D7.4                       | NLYETQLTHK               | 22  | 3913  | 2.14 | 0.14 | 7   |
| 10 K02D7.4                       | NLYETQLTHK               | 47  | 3604  | 2.16 | 0.12 | 6   |
| 22 K02D7.4                       | NLYETQLTHK               | 40  | 4041  | 2.72 | 0.13 | 5   |
| 10 K02D7.4                       | CAEQAFGAVRVGGK           | 28  | 1045  | 2.76 | 0.26 | 9   |
| 22 K02D7.4                       | AALNVILAASK              | 55  | 1109  | 3.20 | 0.25 | 8   |
| 22 K02D7.4                       | AALNVILAASK              | 64  | 1009  | 8.28 | 0.36 | 4   |
| 1 K02F2.1a;K02F2.1b              | TRLLYEHVNEEK             | 12  | 1791  | 1.62 | 0.15 | 9   |
| 1 K02F2.2                        | ANIIVTTTGCK              | 21  | 1003  | 0.14 | 0.15 | 107 |
| 1 K02F2.2                        | LADFGRK                  | 22  | 21394 | 0.14 | 0.24 | 173 |
| 1 K02F2.2                        | LADFGRK                  | 23  | 19938 | 0.14 | 0.24 | 171 |
| 7 K02F2.2                        | VAVVAGYGDVGK             | 63  | 2267  | 0.15 | 0.23 | 150 |
| 7 K02F2.2                        | LADFGRK                  | 20  | 1710  | 0.18 | 0.25 | 143 |
| 10 K02F2.2                       | VAVVAGYGDVGK             | 91  | 8294  | 0.18 | 0.17 | 97  |
| 7 K02F2.2                        | RATDVMLAGK               | 43  | 39231 | 0.19 | 0.18 | 93  |
| 10 K02F2.2                       | TLDEEVAYLHLAQLGVK        | 101 | 8623  | 0.19 | 0.18 | 94  |
| 10 K02F2.2                       | TLDEEVAYLHLAQLGVK        | 99  | 7422  | 0.19 | 0.18 | 93  |
| 10 K02F2.2                       | FGTPQEQYK                | 29  | 12518 | 0.19 | 0.09 | 44  |
| 10 K02F2.2                       | TLDEEVAYLHLAQLGVK        | 37  | 2644  | 0.19 | 0.21 | 108 |
| 10 K02F2.2                       | VAVVAGYGDVGK             | 101 | 8836  | 0.20 | 0.14 | 73  |
| 22 K02F2.2                       | LADFGRK                  | 35  | 10957 | 0.20 | 0.25 | 124 |
| 10 K02F2.2                       | LGLYVLPK                 | 45  | 6203  | 0.21 | 0.23 | 109 |
| 10 K02F2.2                       | YPQYLAGIRGLSEETTTGVHNLAK | 41  | 10172 | 0.21 | 0.22 | 106 |
| 10 K02F2.2                       | FGTPQEQYK                | 36  | 12693 | 0.21 | 0.22 | 101 |
| 22 K02F2.2                       | LGLYVLPK                 | 45  | 5645  | 0.22 | 0.11 | 52  |
| 22 K02F2.2                       | LGLYVLPK                 | 60  | 9742  | 0.23 | 0.32 | 139 |
| 10 K02F2.2                       | FGTPQEQYK                | 24  | 15929 | 0.23 | 0.15 | 66  |
| 1 K02F2.2                        | LGLYVLPK                 | 32  | 3474  | 0.24 | 0.05 | 23  |
| 1 K02F2.2                        | RATDVMLAGK               | 25  | 2227  | 0.24 | 0.12 | 51  |
| 1 K02F2.2                        | LGLYVLPK                 | 36  | 3265  | 0.25 | 0.09 | 36  |
| 7 K02F2.2                        | LADFGRK                  | 24  | 6603  | 0.25 | 0.17 | 67  |
| 22 K02F2.2                       | FGTPQEQYK                | 17  | 4171  | 0.26 | 0.45 | 173 |
| 10 K02F2.2                       | EIILAENEMPLMAMRSK        | 14  | 1577  | 0.26 | 0.21 | 81  |
| 22 K02F2.2                       | FDNLYGIRESLPDGIK         | 47  | 3201  | 0.26 | 0.27 | 104 |
| 10 K02F2.2                       | FGTPQEQYK                | 17  | 11037 | 0.26 | 0.26 | 98  |
| 10 K02F2.2                       | LADFGRK                  | 26  | 86862 | 0.26 | 0.13 | 48  |

|            |                          |     |       |      |      |     |
|------------|--------------------------|-----|-------|------|------|-----|
| 10 K02F2.2 | LGLYVLPK                 | 38  | 1864  | 0.27 | 0.20 | 74  |
| 22 K02F2.2 | FDNLYGIRESLPDGIK         | 36  | 2146  | 0.27 | 0.23 | 84  |
| 10 K02F2.2 | EIILAENEMPGLMAMRSK       | 17  | 5533  | 0.28 | 0.20 | 73  |
| 7 K02F2.2  | RATDVMLAGK               | 21  | 1368  | 0.28 | 0.30 | 106 |
| 1 K02F2.2  | VAVVAGYGDVGK             | 42  | 1433  | 0.28 | 0.30 | 106 |
| 10 K02F2.2 | FDNLYGIRESLPDGIK         | 30  | 2431  | 0.29 | 0.13 | 47  |
| 22 K02F2.2 | FDNLYGIRESLPDGIK         | 31  | 2203  | 0.29 | 0.13 | 45  |
| 7 K02F2.2  | VAVVAGYGDVGK             | 102 | 14327 | 0.29 | 0.08 | 26  |
| 7 K02F2.2  | VAVVAGYGDVGK             | 73  | 8349  | 0.29 | 0.19 | 64  |
| 10 K02F2.2 | YGPSQPLK                 | 20  | 37536 | 0.29 | 0.06 | 20  |
| 1 K02F2.2  | VAVVAGYGDVGK             | 99  | 7761  | 0.29 | 0.11 | 37  |
| 7 K02F2.2  | RATDVMLAGK               | 51  | 32643 | 0.29 | 0.35 | 118 |
| 10 K02F2.2 | FDNLYGIRESLPDGIK         | 42  | 3731  | 0.30 | 0.17 | 56  |
| 10 K02F2.2 | YPQYLAGIRGLSEETTTGVHNLAK | 30  | 2057  | 0.30 | 0.16 | 53  |
| 22 K02F2.2 | VAVVAGYGDVGK             | 126 | 13495 | 0.30 | 0.13 | 42  |
| 10 K02F2.2 | FGTPQEYK                 | 23  | 9846  | 0.30 | 0.17 | 54  |
| 22 K02F2.2 | VAVVAGYGDVGK             | 104 | 9818  | 0.31 | 0.21 | 69  |
| 22 K02F2.2 | LGLYVLPK                 | 54  | 3541  | 0.31 | 0.13 | 42  |
| 7 K02F2.2  | VAVVAGYGDVGK             | 94  | 13072 | 0.31 | 0.20 | 66  |
| 7 K02F2.2  | RATDVMLAGK               | 14  | 1230  | 0.31 | 0.05 | 17  |
| 10 K02F2.2 | TLDEEVAYLHLAQLGVK        | 33  | 2306  | 0.32 | 0.13 | 42  |
| 10 K02F2.2 | YGPSQPLK                 | 19  | 40003 | 0.32 | 0.11 | 34  |
| 22 K02F2.2 | TLDEEVAYLHLAQLGVK        | 87  | 5674  | 0.32 | 0.21 | 67  |
| 22 K02F2.2 | TLDEEVAYLHLAQLGVK        | 37  | 2359  | 0.33 | 0.18 | 56  |
| 7 K02F2.2  | LADFGRK                  | 25  | 10034 | 0.33 | 0.15 | 46  |
| 7 K02F2.2  | VAVVAGYGDVGK             | 98  | 12267 | 0.33 | 0.16 | 49  |
| 22 K02F2.2 | TLDEEVAYLHLAQLGVK        | 16  | 1243  | 0.34 | 0.14 | 41  |
| 10 K02F2.2 | YPQYLAGIRGLSEETTTGVHNLAK | 60  | 15530 | 0.34 | 0.30 | 89  |
| 10 K02F2.2 | FDNLYGIRESLPDGIK         | 22  | 981   | 0.34 | 0.29 | 85  |
| 1 K02F2.2  | LADFGRK                  | 13  | 2729  | 0.34 | 0.20 | 59  |
| 10 K02F2.2 | LADFGRK                  | 29  | 88102 | 0.34 | 0.16 | 47  |
| 10 K02F2.2 | LADFGRK                  | 20  | 1922  | 0.35 | 0.27 | 79  |
| 22 K02F2.2 | TLDEEVAYLHLAQLGVK        | 65  | 2445  | 0.35 | 0.14 | 39  |
| 7 K02F2.2  | FGTPQEYK                 | 19  | 2839  | 0.36 | 0.26 | 74  |
| 1 K02F2.2  | VAVVAGYGDVGK             | 104 | 6551  | 0.37 | 0.07 | 19  |
| 22 K02F2.2 | TLDEEVAYLHLAQLGVK        | 61  | 7749  | 0.37 | 0.11 | 30  |
| 10 K02F2.2 | YPQYLAGIRGLSEETTTGVHNLAK | 37  | 1707  | 0.38 | 0.24 | 63  |
| 22 K02F2.2 | TLDEEVAYLHLAQLGVK        | 84  | 2342  | 0.38 | 0.23 | 60  |
| 10 K02F2.2 | TLDEEVAYLHLAQLGVK        | 59  | 1256  | 0.39 | 0.18 | 46  |
| 10 K02F2.2 | YPQYLAGIRGLSEETTTGVHNLAK | 33  | 1988  | 0.39 | 0.17 | 44  |
| 22 K02F2.2 | TLDEEVAYLHLAQLGVK        | 64  | 4219  | 0.40 | 0.32 | 80  |
| 7 K02F2.2  | VAVVAGYGDVGK             | 132 | 12498 | 0.40 | 0.09 | 23  |
| 22 K02F2.2 | TLDEEVAYLHLAQLGVK        | 78  | 6553  | 0.40 | 0.20 | 49  |
| 10 K02F2.2 | TLDEEVAYLHLAQLGVK        | 48  | 1056  | 0.40 | 0.26 | 65  |
| 7 K02F2.2  | VAVVAGYGDVGK             | 120 | 13302 | 0.40 | 0.06 | 14  |
| 10 K02F2.2 | LGLYVLPK                 | 28  | 3217  | 0.41 | 0.23 | 57  |
| 22 K02F2.2 | FGTPQEYK                 | 13  | 4028  | 0.41 | 0.16 | 38  |
| 22 K02F2.2 | YGPSQPLK                 | 21  | 10840 | 0.41 | 0.05 | 12  |
| 1 K02F2.2  | FGTPQEYK                 | 12  | 2432  | 0.41 | 0.38 | 93  |
| 7 K02F2.2  | LADFGRK                  | 27  | 5752  | 0.42 | 0.28 | 67  |
| 10 K02F2.2 | VAVVAGYGDVGK             | 119 | 30561 | 0.43 | 0.09 | 21  |
| 22 K02F2.2 | YPQYLAGIRGLSEETTTGVHNLAK | 49  | 4029  | 0.43 | 0.21 | 48  |
| 10 K02F2.2 | LADFGRK                  | 26  | 32728 | 0.44 | 0.22 | 51  |
| 10 K02F2.2 | LADFGRK                  | 33  | 89819 | 0.44 | 0.19 | 44  |
| 22 K02F2.2 | LADFGRK                  | 25  | 22743 | 0.44 | 0.11 | 24  |
| 22 K02F2.2 | TLDEEVAYLHLAQLGVK        | 48  | 2794  | 0.44 | 0.17 | 38  |
| 7 K02F2.2  | TLDEEVAYLHLAQLGVK        | 43  | 3469  | 0.45 | 0.19 | 41  |
| 7 K02F2.2  | TLDEEVAYLHLAQLGVK        | 43  | 3098  | 0.46 | 0.04 | 9   |
| 22 K02F2.2 | YGPSQPLK                 | 18  | 7716  | 0.46 | 0.15 | 32  |
| 7 K02F2.2  | LGLYVLPK                 | 16  | 2114  | 0.46 | 0.05 | 12  |
| 7 K02F2.2  | EIILAENEMPGLMAMRSK       | 20  | 3614  | 0.46 | 0.08 | 17  |
| 10 K02F2.2 | WLNTNATK                 | 47  | 13313 | 0.46 | 0.09 | 19  |
| 10 K02F2.2 | LADFGRK                  | 33  | 97707 | 0.46 | 0.13 | 28  |
| 7 K02F2.2  | WLNTNATK                 | 32  | 1958  | 0.46 | 0.11 | 24  |
| 7 K02F2.2  | TLDEEVAYLHLAQLGVK        | 62  | 1778  | 0.47 | 0.32 | 69  |
| 7 K02F2.2  | TLDEEVAYLHLAQLGVK        | 66  | 1306  | 0.47 | 0.24 | 50  |
| 22 K02F2.2 | YPQYLAGIRGLSEETTTGVHNLAK | 28  | 2966  | 0.47 | 0.22 | 47  |
| 7 K02F2.2  | VAVVAGYGDVGK             | 32  | 2002  | 0.47 | 0.16 | 34  |
| 7 K02F2.2  | FGTPQEYK                 | 15  | 2272  | 0.47 | 0.10 | 21  |
| 10 K02F2.2 | LADFGRK                  | 19  | 26449 | 0.47 | 0.10 | 21  |
| 1 K02F2.2  | DTIKPQVDRYTLK            | 15  | 4842  | 0.47 | 0.13 | 27  |
| 22 K02F2.2 | FDNLYGIRESLPDGIK         | 55  | 4111  | 0.47 | 0.15 | 32  |
| 10 K02F2.2 | RATDVMLAGK               | 37  | 2631  | 0.48 | 0.12 | 26  |
| 7 K02F2.2  | LADFGRK                  | 19  | 2928  | 0.48 | 0.11 | 22  |
| 7 K02F2.2  | FGTPQEYK                 | 16  | 2229  | 0.49 | 0.16 | 33  |
| 7 K02F2.2  | LADFGRK                  | 24  | 6161  | 0.49 | 0.18 | 36  |
| 10 K02F2.2 | VAVVAGYGDVGK             | 135 | 36066 | 0.49 | 0.07 | 14  |
| 22 K02F2.2 | YPQYLAGIRGLSEETTTGVHNLAK | 47  | 13475 | 0.49 | 0.23 | 48  |
| 22 K02F2.2 | WLNTNATK                 | 23  | 4344  | 0.49 | 0.10 | 20  |
| 7 K02F2.2  | TLDEEVAYLHLAQLGVK        | 118 | 6446  | 0.49 | 0.10 | 21  |
| 7 K02F2.2  | WLNTNATK                 | 12  | 1005  | 0.49 | 0.09 | 18  |
| 10 K02F2.2 | WLNTNATK                 | 47  | 11488 | 0.50 | 0.15 | 29  |
| 1 K02F2.2  | LGLYVLPK                 | 36  | 5408  | 0.50 | 0.19 | 39  |
| 10 K02F2.2 | LGLYVLPK                 | 28  | 2179  | 0.51 | 0.15 | 30  |
| 7 K02F2.2  | LGLYVLPK                 | 22  | 3253  | 0.51 | 0.10 | 19  |
| 22 K02F2.2 | EIILAENEMPGLMAMRSK       | 15  | 959   | 0.51 | 0.30 | 58  |
| 22 K02F2.2 | FDNLYGIRESLPDGIK         | 51  | 1951  | 0.52 | 0.30 | 58  |
| 7 K02F2.2  | LADFGRK                  | 13  | 3396  | 0.52 | 0.20 | 38  |
| 10 K02F2.2 | LADFGRK                  | 22  | 12451 | 0.52 | 0.07 | 13  |
| 10 K02F2.2 | LGLYVLPK                 | 10  | 3257  | 0.52 | 0.09 | 17  |
| 10 K02F2.2 | LADFGRK                  | 30  | 18473 | 0.53 | 0.14 | 26  |
| 10 K02F2.2 | WLNTNATK                 | 27  | 2839  | 0.53 | 0.20 | 38  |
| 7 K02F2.2  | YGPSQPLK                 | 12  | 1043  | 0.53 | 0.23 | 43  |
| 10 K02F2.2 | RATDVMLAGK               | 22  | 3488  | 0.53 | 0.10 | 19  |
| 22 K02F2.2 | LGLYVLPK                 | 44  | 3793  | 0.54 | 0.13 | 24  |
| 7 K02F2.2  | VAVVAGYGDVGK             | 99  | 8167  | 0.54 | 0.18 | 34  |
| 7 K02F2.2  | RATDVMLAGK               | 42  | 10887 | 0.54 | 0.14 | 25  |
| 7 K02F2.2  | FGTPQEYK                 | 12  | 2539  | 0.54 | 0.38 | 69  |
| 7 K02F2.2  | LADFGRK                  | 25  | 9073  | 0.55 | 0.12 | 22  |
| 10 K02F2.2 | FGTPQEYK                 | 11  | 5189  | 0.55 | 0.18 | 33  |
| 10 K02F2.2 | TLDEEVAYLHLAQLGVK        | 63  | 1957  | 0.56 | 0.23 | 41  |

|            |                          |     |        |      |      |    |
|------------|--------------------------|-----|--------|------|------|----|
| 22 K02F2.2 | FGTPQEQYK                | 10  | 3340   | 0.56 | 0.15 | 27 |
| 10 K02F2.2 | FDNLYGIRESLPDGIK         | 14  | 3369   | 0.56 | 0.19 | 35 |
| 10 K02F2.2 | LGLYVLPK                 | 25  | 1959   | 0.56 | 0.27 | 49 |
| 10 K02F2.2 | RATDVMLAGK               | 16  | 3517   | 0.56 | 0.14 | 24 |
| 7 K02F2.2  | WLNTNATK                 | 33  | 1726   | 0.56 | 0.10 | 18 |
| 7 K02F2.2  | FGTPQEQYK                | 18  | 4507   | 0.56 | 0.25 | 44 |
| 1 K02F2.2  | ANIIVTTTGCK              | 38  | 1066   | 0.57 | 0.07 | 12 |
| 7 K02F2.2  | WLNTNATK                 | 16  | 2041   | 0.57 | 0.21 | 37 |
| 1 K02F2.2  | LADFGRK                  | 14  | 3429   | 0.57 | 0.19 | 34 |
| 10 K02F2.2 | TLDEEVAYLHLAQLGVK        | 63  | 1625   | 0.57 | 0.14 | 25 |
| 7 K02F2.2  | LADFGRK                  | 22  | 8903   | 0.57 | 0.05 | 9  |
| 22 K02F2.2 | LADFGRK                  | 29  | 22221  | 0.58 | 0.07 | 13 |
| 7 K02F2.2  | FGTPQEQYK                | 26  | 3524   | 0.58 | 0.27 | 46 |
| 22 K02F2.2 | FDNLYGIRESLPDGIK         | 15  | 3864   | 0.58 | 0.10 | 17 |
| 7 K02F2.2  | TLDEEVAYLHLAQLGVK        | 89  | 4652   | 0.58 | 0.14 | 23 |
| 10 K02F2.2 | TLDEEVAYLHLAQLGVK        | 130 | 6796   | 0.58 | 0.13 | 23 |
| 22 K02F2.2 | LADFGRK                  | 30  | 25912  | 0.59 | 0.11 | 19 |
| 22 K02F2.2 | TLDEEVAYLHLAQLGVK        | 96  | 4821   | 0.59 | 0.24 | 40 |
| 7 K02F2.2  | YGPSQPLK                 | 17  | 21662  | 0.60 | 0.13 | 22 |
| 7 K02F2.2  | VAVVAGYGDVGK             | 33  | 931    | 0.60 | 0.24 | 40 |
| 1 K02F2.2  | LGLYVLPK                 | 32  | 4888   | 0.60 | 0.04 | 7  |
| 22 K02F2.2 | RATDVMLAGK               | 33  | 21255  | 0.60 | 0.23 | 39 |
| 22 K02F2.2 | LADFGRK                  | 12  | 1648   | 0.61 | 0.19 | 31 |
| 7 K02F2.2  | LADFGRK                  | 31  | 25359  | 0.61 | 0.08 | 14 |
| 7 K02F2.2  | TLDEEVAYLHLAQLGVK        | 89  | 2254   | 0.63 | 0.19 | 30 |
| 22 K02F2.2 | LADFGRK                  | 13  | 18157  | 0.63 | 0.11 | 18 |
| 22 K02F2.2 | FGTPQEQYK                | 16  | 4550   | 0.64 | 0.26 | 41 |
| 10 K02F2.2 | VPAINVNDSVTK             | 15  | 52554  | 0.64 | 0.13 | 21 |
| 7 K02F2.2  | YGPSQPLK                 | 19  | 25875  | 0.64 | 0.10 | 15 |
| 10 K02F2.2 | ANIIVTTTGCK              | 16  | 3135   | 0.64 | 0.19 | 29 |
| 10 K02F2.2 | TLDEEVAYLHLAQLGVK        | 106 | 5297   | 0.65 | 0.12 | 18 |
| 7 K02F2.2  | FGTPQEQYK                | 26  | 4450   | 0.65 | 0.28 | 43 |
| 1 K02F2.2  | VAVVAGYGDVGK             | 121 | 12546  | 0.65 | 0.07 | 11 |
| 22 K02F2.2 | TLDEEVAYLHLAQLGVK        | 36  | 2081   | 0.65 | 0.23 | 36 |
| 22 K02F2.2 | YGPSQPLK                 | 25  | 12309  | 0.65 | 0.07 | 10 |
| 22 K02F2.2 | YGPSQPLK                 | 21  | 19567  | 0.66 | 0.08 | 12 |
| 22 K02F2.2 | VAVVAGYGDVGK             | 131 | 105325 | 0.66 | 0.09 | 14 |
| 10 K02F2.2 | VAVVAGYGDVGK             | 10  | 791    | 0.66 | 0.23 | 35 |
| 7 K02F2.2  | WLNTNATK                 | 14  | 1786   | 0.66 | 0.21 | 31 |
| 10 K02F2.2 | RATDVMLAGK               | 56  | 103425 | 0.67 | 0.14 | 21 |
| 22 K02F2.2 | LGLYVLPK                 | 29  | 12913  | 0.67 | 0.06 | 9  |
| 22 K02F2.2 | YPQYLAGIRGLSEETTTGVHNLAK | 37  | 1508   | 0.67 | 0.17 | 25 |
| 10 K02F2.2 | WLNTNATK                 | 14  | 6363   | 0.68 | 0.11 | 16 |
| 7 K02F2.2  | TLDEEVAYLHLAQLGVK        | 66  | 1620   | 0.68 | 0.18 | 27 |
| 22 K02F2.2 | RATDVMLAGK               | 24  | 4179   | 0.68 | 0.13 | 20 |
| 10 K02F2.2 | TLDEEVAYLHLAQLGVK        | 60  | 792    | 0.68 | 0.28 | 41 |
| 7 K02F2.2  | LADFGRK                  | 24  | 8587   | 0.68 | 0.24 | 35 |
| 10 K02F2.2 | LADFGRK                  | 23  | 4321   | 0.69 | 0.11 | 16 |
| 22 K02F2.2 | YPQYLAGIRGLSEETTTGVHNLAK | 55  | 2223   | 0.69 | 0.16 | 23 |
| 7 K02F2.2  | LADFGRK                  | 29  | 20702  | 0.69 | 0.09 | 13 |
| 10 K02F2.2 | VPAINVNDSVTK             | 19  | 6957   | 0.69 | 0.28 | 40 |
| 1 K02F2.2  | LADFGRK                  | 12  | 3286   | 0.69 | 0.08 | 12 |
| 7 K02F2.2  | VPAINVNDSVTK             | 11  | 2012   | 0.69 | 0.32 | 46 |
| 7 K02F2.2  | VPAINVNDSVTK             | 40  | 25092  | 0.69 | 0.09 | 13 |
| 22 K02F2.2 | TLDEEVAYLHLAQLGVK        | 96  | 3641   | 0.70 | 0.15 | 21 |
| 22 K02F2.2 | VAVVAGYGDVGK             | 126 | 76509  | 0.70 | 0.05 | 8  |
| 7 K02F2.2  | VAVVAGYGDVGK             | 72  | 2859   | 0.70 | 0.13 | 18 |
| 10 K02F2.2 | LGLYVLPK                 | 13  | 1776   | 0.71 | 0.20 | 28 |
| 22 K02F2.2 | FDNLYGIRESLPDGIK         | 13  | 1317   | 0.71 | 0.11 | 15 |
| 22 K02F2.2 | YPQYLAGIRGLSEETTTGVHNLAK | 40  | 1954   | 0.71 | 0.15 | 21 |
| 1 K02F2.2  | LGLYVLPK                 | 44  | 4754   | 0.71 | 0.13 | 18 |
| 1 K02F2.2  | LADFGRK                  | 14  | 2691   | 0.71 | 0.16 | 23 |
| 10 K02F2.2 | FDNLYGIRESLPDGIK         | 48  | 3042   | 0.72 | 0.14 | 19 |
| 1 K02F2.2  | TLDEEVAYLHLAQLGVK        | 62  | 1132   | 0.73 | 0.14 | 20 |
| 10 K02F2.2 | FDNLYGIRESLPDGIK         | 31  | 1687   | 0.73 | 0.30 | 42 |
| 7 K02F2.2  | WLNTNATK                 | 26  | 1771   | 0.73 | 0.20 | 28 |
| 10 K02F2.2 | RATDVMLAGK               | 25  | 35216  | 0.73 | 0.16 | 22 |
| 10 K02F2.2 | EIILAENEMPGLMAMRSK       | 14  | 2231   | 0.73 | 0.10 | 13 |
| 22 K02F2.2 | WLNTNATK                 | 28  | 2842   | 0.73 | 0.05 | 7  |
| 22 K02F2.2 | RATDVMLAGK               | 19  | 3605   | 0.73 | 0.19 | 26 |
| 22 K02F2.2 | LGLYVLPK                 | 33  | 13915  | 0.74 | 0.06 | 8  |
| 10 K02F2.2 | RATDVMLAGK               | 14  | 6633   | 0.74 | 0.15 | 20 |
| 1 K02F2.2  | FGTPQEQYK                | 28  | 3198   | 0.74 | 0.26 | 35 |
| 22 K02F2.2 | TLDEEVAYLHLAQLGVK        | 81  | 2824   | 0.75 | 0.16 | 22 |
| 22 K02F2.2 | WLNTNATK                 | 13  | 2559   | 0.75 | 0.16 | 21 |
| 7 K02F2.2  | EIILAENEMPGLMAMRSK       | 39  | 7700   | 0.75 | 0.13 | 18 |
| 7 K02F2.2  | VAVVAGYGDVGK             | 25  | 1493   | 0.75 | 0.24 | 32 |
| 7 K02F2.2  | TLDEEVAYLHLAQLGVK        | 80  | 1307   | 0.75 | 0.19 | 25 |
| 10 K02F2.2 | RATDVMLAGK               | 27  | 16291  | 0.75 | 0.10 | 13 |
| 1 K02F2.2  | TLDEEVAYLHLAQLGVK        | 83  | 2506   | 0.76 | 0.15 | 20 |
| 10 K02F2.2 | WLNTNATK                 | 36  | 7013   | 0.77 | 0.15 | 20 |
| 10 K02F2.2 | FGTPQEQYK                | 40  | 15858  | 0.77 | 0.15 | 19 |
| 7 K02F2.2  | RATDVMLAGK               | 27  | 3426   | 0.78 | 0.18 | 23 |
| 10 K02F2.2 | LGLYVLPK                 | 14  | 8061   | 0.78 | 0.16 | 21 |
| 10 K02F2.2 | RATDVMLAGK               | 46  | 5546   | 0.78 | 0.10 | 13 |
| 10 K02F2.2 | TLDEEVAYLHLAQLGVK        | 15  | 1504   | 0.79 | 0.15 | 19 |
| 22 K02F2.2 | WLNTNATK                 | 39  | 3296   | 0.79 | 0.11 | 14 |
| 22 K02F2.2 | LADFGRK                  | 14  | 4809   | 0.79 | 0.14 | 18 |
| 22 K02F2.2 | EIILAENEMPGLMAMRSK       | 29  | 2400   | 0.79 | 0.09 | 12 |
| 7 K02F2.2  | YGPSQPLK                 | 13  | 1542   | 0.79 | 0.14 | 18 |
| 1 K02F2.2  | RATDVMLAGK               | 13  | 804    | 0.79 | 0.18 | 22 |
| 10 K02F2.2 | LGLYVLPK                 | 12  | 687    | 0.79 | 0.18 | 23 |
| 7 K02F2.2  | EIILAENEMPGLMAMRSK       | 39  | 6808   | 0.80 | 0.17 | 22 |
| 1 K02F2.2  | VAVVAGYGDVGK             | 105 | 13952  | 0.80 | 0.11 | 14 |
| 10 K02F2.2 | FGTPQEQYK                | 41  | 19358  | 0.80 | 0.13 | 17 |
| 22 K02F2.2 | RATDVMLAGK               | 17  | 3791   | 0.80 | 0.18 | 22 |
| 1 K02F2.2  | TLDEEVAYLHLAQLGVK        | 82  | 1846   | 0.80 | 0.16 | 19 |
| 22 K02F2.2 | YPQYLAGIRGLSEETTTGVHNLAK | 51  | 18889  | 0.80 | 0.17 | 21 |
| 10 K02F2.2 | TLDEEVAYLHLAQLGVK        | 28  | 1689   | 0.80 | 0.13 | 17 |
| 10 K02F2.2 | VPAINVNDSVTK             | 21  | 3833   | 0.81 | 0.08 | 10 |
| 10 K02F2.2 | RATDVMLAGK               | 30  | 46291  | 0.81 | 0.12 | 14 |

|            |                          |     |        |      |      |    |
|------------|--------------------------|-----|--------|------|------|----|
| 22 K02F2.2 | RATDVMLAGK               | 37  | 2596   | 0.82 | 0.15 | 18 |
| 22 K02F2.2 | YPQYLAGIRGLSEETTTGVHNLAK | 60  | 3599   | 0.82 | 0.28 | 34 |
| 10 K02F2.2 | FDNLYGIRESLPDGIK         | 23  | 796    | 0.83 | 0.14 | 17 |
| 22 K02F2.2 | RATDVMLAGK               | 20  | 2156   | 0.83 | 0.20 | 24 |
| 10 K02F2.2 | FDNLYGIRESLPDGIK         | 13  | 3606   | 0.84 | 0.18 | 21 |
| 22 K02F2.2 | LGLYVLPK                 | 24  | 7866   | 0.85 | 0.11 | 13 |
| 10 K02F2.2 | RATDVMLAGK               | 50  | 114231 | 0.85 | 0.14 | 17 |
| 7 K02F2.2  | VAVVAGYGDVGK             | 28  | 2061   | 0.85 | 0.22 | 26 |
| 1 K02F2.2  | ANIIVTTTGCK              | 23  | 780    | 0.87 | 0.12 | 13 |
| 22 K02F2.2 | LADFGRK                  | 36  | 9991   | 0.87 | 0.07 | 8  |
| 22 K02F2.2 | FGTPQEYK                 | 28  | 2834   | 0.87 | 0.30 | 34 |
| 7 K02F2.2  | EIILAENEMPGLMAMRSK       | 61  | 12531  | 0.89 | 0.06 | 7  |
| 10 K02F2.2 | RATDVMLAGK               | 56  | 3760   | 0.89 | 0.11 | 13 |
| 22 K02F2.2 | YPQYLAGIRGLSEETTTGVHNLAK | 58  | 3715   | 0.89 | 0.26 | 30 |
| 10 K02F2.2 | DTIKPQVDRYTLK            | 12  | 11462  | 0.89 | 0.20 | 23 |
| 10 K02F2.2 | WLNTNATK                 | 38  | 6483   | 0.90 | 0.04 | 5  |
| 22 K02F2.2 | YPQYLAGIRGLSEETTTGVHNLAK | 32  | 1835   | 0.90 | 0.19 | 21 |
| 1 K02F2.2  | TLDEEVAYLHLAQLGVK        | 50  | 394    | 0.91 | 0.16 | 17 |
| 10 K02F2.2 | FDNLYGIRESLPDGIK         | 22  | 1804   | 0.91 | 0.17 | 19 |
| 22 K02F2.2 | WLNTNATK                 | 27  | 2569   | 0.91 | 0.08 | 9  |
| 1 K02F2.2  | LGLYVLPK                 | 17  | 2958   | 0.91 | 0.11 | 12 |
| 10 K02F2.2 | FDNLYGIRESLPDGIK         | 12  | 1373   | 0.92 | 0.17 | 18 |
| 7 K02F2.2  | RATDVMLAGK               | 16  | 1833   | 0.92 | 0.12 | 13 |
| 10 K02F2.2 | LGLYVLPK                 | 12  | 4673   | 0.92 | 0.08 | 8  |
| 10 K02F2.2 | TLDEEVAYLHLAQLGVK        | 46  | 1101   | 0.93 | 0.17 | 18 |
| 22 K02F2.2 | RATDVMLAGK               | 43  | 39786  | 0.94 | 0.13 | 13 |
| 1 K02F2.2  | RATDVMLAGK               | 27  | 7020   | 0.94 | 0.14 | 15 |
| 10 K02F2.2 | RATDVMLAGK               | 30  | 4908   | 0.95 | 0.18 | 19 |
| 7 K02F2.2  | LADFGRK                  | 24  | 5098   | 0.95 | 0.05 | 5  |
| 10 K02F2.2 | VAVVAGYGDVGK             | 113 | 25895  | 0.95 | 0.10 | 10 |
| 10 K02F2.2 | YPQYLAGIRGLSEETTTGVHNLAK | 20  | 2113   | 0.96 | 0.16 | 16 |
| 10 K02F2.2 | YGPSQPLK                 | 31  | 28778  | 0.96 | 0.05 | 5  |
| 10 K02F2.2 | RATDVMLAGK               | 32  | 6126   | 0.96 | 0.14 | 14 |
| 7 K02F2.2  | VPAINVNDSVTK             | 26  | 13142  | 0.96 | 0.30 | 31 |
| 1 K02F2.2  | TLDEEVAYLHLAQLGVK        | 59  | 1207   | 0.97 | 0.16 | 17 |
| 22 K02F2.2 | LADFGRK                  | 15  | 9671   | 0.97 | 0.13 | 14 |
| 10 K02F2.2 | FDNLYGIRESLPDGIK         | 20  | 1016   | 0.97 | 0.16 | 16 |
| 22 K02F2.2 | RATDVMLAGK               | 32  | 15794  | 0.97 | 0.26 | 26 |
| 7 K02F2.2  | YPQYLAGIRGLSEETTTGVHNLAK | 39  | 1903   | 0.98 | 0.11 | 12 |
| 7 K02F2.2  | WLNTNATK                 | 26  | 1997   | 0.98 | 0.15 | 15 |
| 10 K02F2.2 | TLDEEVAYLHLAQLGVK        | 79  | 2845   | 0.98 | 0.23 | 23 |
| 7 K02F2.2  | VAVVAGYGDVGK             | 13  | 1006   | 0.98 | 0.26 | 27 |
| 22 K02F2.2 | RATDVMLAGK               | 34  | 7126   | 0.98 | 0.25 | 25 |
| 22 K02F2.2 | WLNTNATK                 | 17  | 2140   | 0.98 | 0.11 | 12 |
| 7 K02F2.2  | LADFGRK                  | 16  | 2929   | 0.98 | 0.07 | 7  |
| 7 K02F2.2  | RATDVMLAGK               | 29  | 1884   | 0.99 | 0.06 | 6  |
| 22 K02F2.2 | FGTPQEYK                 | 25  | 31296  | 1.00 | 0.12 | 12 |
| 10 K02F2.2 | RATDVMLAGK               | 32  | 5503   | 1.01 | 0.20 | 20 |
| 10 K02F2.2 | RATDVMLAGK               | 43  | 4591   | 1.01 | 0.07 | 7  |
| 22 K02F2.2 | YPQYLAGIRGLSEETTTGVHNLAK | 40  | 16993  | 1.01 | 0.24 | 24 |
| 7 K02F2.2  | YGPSQPLK                 | 14  | 2289   | 1.01 | 0.17 | 16 |
| 10 K02F2.2 | LGLYVLPK                 | 28  | 7577   | 1.01 | 0.07 | 7  |
| 1 K02F2.2  | YPQYLAGIRGLSEETTTGVHNLAK | 14  | 565    | 1.02 | 0.20 | 20 |
| 1 K02F2.2  | VPAINVNDSVTK             | 12  | 2428   | 1.02 | 0.22 | 22 |
| 7 K02F2.2  | LGLYVLPK                 | 11  | 3042   | 1.02 | 0.14 | 13 |
| 22 K02F2.2 | YPQYLAGIRGLSEETTTGVHNLAK | 59  | 4389   | 1.03 | 0.11 | 10 |
| 7 K02F2.2  | LGLYVLPK                 | 15  | 1704   | 1.05 | 0.12 | 12 |
| 10 K02F2.2 | VPAINVNDSVTK             | 45  | 15169  | 1.05 | 0.24 | 22 |
| 22 K02F2.2 | VAVVAGYGDVGK             | 106 | 11481  | 1.05 | 0.11 | 10 |
| 10 K02F2.2 | TLDEEVAYLHLAQLGVK        | 65  | 2953   | 1.06 | 0.23 | 22 |
| 22 K02F2.2 | YPQYLAGIRGLSEETTTGVHNLAK | 47  | 3964   | 1.06 | 0.16 | 15 |
| 22 K02F2.2 | ANIIVTTTGCK              | 22  | 853    | 1.06 | 0.11 | 10 |
| 22 K02F2.2 | LADFGRK                  | 11  | 1689   | 1.06 | 0.08 | 7  |
| 22 K02F2.2 | YPQYLAGIRGLSEETTTGVHNLAK | 18  | 2036   | 1.07 | 0.19 | 18 |
| 10 K02F2.2 | RATDVMLAGK               | 31  | 3827   | 1.07 | 0.23 | 22 |
| 1 K02F2.2  | RATDVMLAGK               | 18  | 4008   | 1.08 | 0.06 | 5  |
| 22 K02F2.2 | VAVVAGYGDVGK             | 32  | 2441   | 1.08 | 0.27 | 25 |
| 22 K02F2.2 | RATDVMLAGK               | 29  | 3687   | 1.08 | 0.11 | 10 |
| 10 K02F2.2 | TLDEEVAYLHLAQLGVK        | 10  | 847    | 1.08 | 0.13 | 12 |
| 22 K02F2.2 | VAVVAGYGDVGK             | 57  | 4797   | 1.09 | 0.09 | 8  |
| 10 K02F2.2 | TLDEEVAYLHLAQLGVK        | 76  | 1519   | 1.09 | 0.15 | 14 |
| 7 K02F2.2  | WLNTNATK                 | 14  | 1963   | 1.09 | 0.21 | 19 |
| 22 K02F2.2 | EIILAENEMPGLMAMRSK       | 15  | 2492   | 1.09 | 0.14 | 13 |
| 10 K02F2.2 | WLNTNATK                 | 17  | 2018   | 1.10 | 0.06 | 5  |
| 22 K02F2.2 | FGTPQEYK                 | 20  | 1486   | 1.10 | 0.15 | 13 |
| 22 K02F2.2 | FGTPQEYK                 | 21  | 31814  | 1.10 | 0.12 | 11 |
| 7 K02F2.2  | EIILAENEMPGLMAMRSK       | 55  | 5841   | 1.11 | 0.10 | 9  |
| 22 K02F2.2 | YPQYLAGIRGLSEETTTGVHNLAK | 47  | 3991   | 1.11 | 0.23 | 20 |
| 10 K02F2.2 | VAVVAGYGDVGK             | 16  | 1316   | 1.12 | 0.22 | 19 |
| 22 K02F2.2 | FGTPQEYK                 | 27  | 1079   | 1.12 | 0.43 | 38 |
| 10 K02F2.2 | WLNTNATK                 | 13  | 1970   | 1.13 | 0.13 | 12 |
| 7 K02F2.2  | FGTPQEYK                 | 16  | 2638   | 1.13 | 0.22 | 20 |
| 10 K02F2.2 | LGLYVLPK                 | 53  | 10568  | 1.13 | 0.14 | 12 |
| 10 K02F2.2 | LADFGRK                  | 16  | 17317  | 1.14 | 0.09 | 8  |
| 10 K02F2.2 | YGPSQPLK                 | 26  | 22325  | 1.14 | 0.04 | 4  |
| 22 K02F2.2 | DGQPLNMILDDGGDLTNLVHAK   | 47  | 1204   | 1.14 | 0.40 | 35 |
| 7 K02F2.2  | RATDVMLAGK               | 18  | 1488   | 1.15 | 0.06 | 5  |
| 22 K02F2.2 | YPQYLAGIRGLSEETTTGVHNLAK | 52  | 11491  | 1.15 | 0.20 | 17 |
| 10 K02F2.2 | RATDVMLAGK               | 11  | 3981   | 1.15 | 0.13 | 12 |
| 10 K02F2.2 | LADFGRK                  | 16  | 12801  | 1.18 | 0.13 | 11 |
| 7 K02F2.2  | YGPSQPLK                 | 10  | 1465   | 1.18 | 0.07 | 6  |
| 22 K02F2.2 | VAVVAGYGDVGK             | 113 | 6290   | 1.19 | 0.10 | 8  |
| 22 K02F2.2 | DGQPLNMILDDGGDLTNLVHAK   | 18  | 7593   | 1.19 | 0.39 | 33 |
| 10 K02F2.2 | TLDEEVAYLHLAQLGVK        | 12  | 1449   | 1.19 | 0.14 | 12 |
| 22 K02F2.2 | YPQYLAGIRGLSEETTTGVHNLAK | 39  | 2760   | 1.19 | 0.15 | 13 |
| 10 K02F2.2 | EIILAENEMPGLMAMRSK       | 12  | 3732   | 1.20 | 0.17 | 14 |
| 7 K02F2.2  | RATDVMLAGK               | 11  | 1531   | 1.21 | 0.12 | 10 |
| 7 K02F2.2  | WLNTNATK                 | 13  | 1507   | 1.21 | 0.11 | 9  |
| 7 K02F2.2  | EIILAENEMPGLMAMRSK       | 34  | 4826   | 1.21 | 0.08 | 6  |
| 7 K02F2.2  | TLDEEVAYLHLAQLGVK        | 109 | 6414   | 1.21 | 0.15 | 12 |
| 7 K02F2.2  | VPAINVNDSVTK             | 21  | 9344   | 1.21 | 0.16 | 13 |

|            |                          |     |        |      |      |    |
|------------|--------------------------|-----|--------|------|------|----|
| 10 K02F2.2 | TLDEEVAYLHLAQLGVK        | 76  | 1028   | 1.22 | 0.22 | 18 |
| 10 K02F2.2 | RATDVMLAGK               | 22  | 4775   | 1.22 | 0.17 | 14 |
| 10 K02F2.2 | DGQPLNMILDDGGDLTNLVHAK   | 11  | 1483   | 1.23 | 0.13 | 10 |
| 10 K02F2.2 | VAVVAGYGDVGK             | 109 | 20014  | 1.25 | 0.09 | 7  |
| 22 K02F2.2 | RATDVMLAGK               | 15  | 3499   | 1.25 | 0.07 | 5  |
| 22 K02F2.2 | VAVVAGYGDVGK             | 29  | 3916   | 1.26 | 0.13 | 10 |
| 22 K02F2.2 | DGQPLNMILDDGGDLTNLVHAK   | 13  | 4143   | 1.26 | 0.29 | 23 |
| 7 K02F2.2  | VPAINVNDSVTK             | 49  | 109876 | 1.26 | 0.11 | 9  |
| 7 K02F2.2  | VAVVAGYGDVGK             | 16  | 1805   | 1.27 | 0.12 | 9  |
| 10 K02F2.2 | RATDVMLAGK               | 14  | 16094  | 1.28 | 0.14 | 11 |
| 22 K02F2.2 | WLNTNATK                 | 18  | 11926  | 1.28 | 0.09 | 7  |
| 10 K02F2.2 | VAVVAGYGDVGK             | 108 | 10533  | 1.28 | 0.11 | 9  |
| 22 K02F2.2 | LADFGRK                  | 35  | 4467   | 1.28 | 0.10 | 8  |
| 7 K02F2.2  | ANIIVTTTGCK              | 48  | 2313   | 1.29 | 0.11 | 9  |
| 10 K02F2.2 | WLNTNATK                 | 24  | 3632   | 1.30 | 0.16 | 12 |
| 22 K02F2.2 | YPQYLAGIRGLSEETTTGVHNLAK | 27  | 2467   | 1.31 | 0.20 | 16 |
| 7 K02F2.2  | VAVVAGYGDVGK             | 19  | 631    | 1.32 | 0.24 | 18 |
| 22 K02F2.2 | VAVVAGYGDVGK             | 41  | 3211   | 1.33 | 0.19 | 15 |
| 10 K02F2.2 | WLNTNATK                 | 40  | 3612   | 1.33 | 0.09 | 7  |
| 7 K02F2.2  | VPAINVNDSVTK             | 17  | 3533   | 1.33 | 0.16 | 12 |
| 7 K02F2.2  | ANIIVTTTGCK              | 37  | 1855   | 1.33 | 0.13 | 10 |
| 10 K02F2.2 | RATDVMLAGK               | 16  | 16007  | 1.34 | 0.14 | 10 |
| 22 K02F2.2 | YPQYLAGIRGLSEETTTGVHNLAK | 51  | 3128   | 1.34 | 0.19 | 14 |
| 1 K02F2.2  | RATDVMLAGK               | 30  | 1710   | 1.34 | 0.17 | 13 |
| 22 K02F2.2 | YGPSQPLK                 | 32  | 94757  | 1.35 | 0.06 | 4  |
| 22 K02F2.2 | YGPSQPLK                 | 34  | 102743 | 1.35 | 0.03 | 2  |
| 7 K02F2.2  | TLDEEVAYLHLAQLGVK        | 96  | 4688   | 1.36 | 0.16 | 12 |
| 22 K02F2.2 | LADFGRK                  | 24  | 203340 | 1.37 | 0.07 | 5  |
| 10 K02F2.2 | VAVVAGYGDVGK             | 43  | 3565   | 1.37 | 0.14 | 10 |
| 22 K02F2.2 | WLNTNATK                 | 11  | 11802  | 1.37 | 0.09 | 7  |
| 1 K02F2.2  | VAVVAGYGDVGK             | 44  | 4386   | 1.37 | 0.11 | 8  |
| 1 K02F2.2  | VAVVAGYGDVGK             | 32  | 2389   | 1.37 | 0.13 | 9  |
| 22 K02F2.2 | LADFGRK                  | 36  | 5198   | 1.38 | 0.12 | 9  |
| 1 K02F2.2  | VAVVAGYGDVGK             | 59  | 4829   | 1.38 | 0.11 | 8  |
| 7 K02F2.2  | VAVVAGYGDVGK             | 59  | 2359   | 1.38 | 0.11 | 8  |
| 22 K02F2.2 | FDONLYGIRESLPDGIK        | 28  | 2842   | 1.39 | 0.14 | 10 |
| 7 K02F2.2  | RATDVMLAGK               | 25  | 23135  | 1.39 | 0.17 | 12 |
| 7 K02F2.2  | RATDVMLAGK               | 13  | 1946   | 1.39 | 0.14 | 10 |
| 22 K02F2.2 | RATDVMLAGK               | 26  | 3342   | 1.39 | 0.07 | 5  |
| 22 K02F2.2 | EIILAENEMPGLMAMRSK       | 24  | 4379   | 1.40 | 0.14 | 10 |
| 22 K02F2.2 | LADFGRK                  | 26  | 205336 | 1.40 | 0.07 | 5  |
| 22 K02F2.2 | RATDVMLAGK               | 15  | 2199   | 1.40 | 0.16 | 12 |
| 7 K02F2.2  | VPAINVNDSVTK             | 32  | 12412  | 1.41 | 0.11 | 8  |
| 22 K02F2.2 | YPQYLAGIRGLSEETTTGVHNLAK | 47  | 1767   | 1.42 | 0.09 | 6  |
| 7 K02F2.2  | EIILAENEMPGLMAMRSK       | 65  | 12261  | 1.43 | 0.08 | 6  |
| 10 K02F2.2 | RATDVMLAGK               | 56  | 53373  | 1.43 | 0.11 | 8  |
| 22 K02F2.2 | RATDVMLAGK               | 16  | 12442  | 1.44 | 0.19 | 13 |
| 1 K02F2.2  | RATDVMLAGK               | 24  | 16097  | 1.45 | 0.19 | 13 |
| 7 K02F2.2  | WLNTNATK                 | 26  | 1635   | 1.47 | 0.20 | 14 |
| 10 K02F2.2 | LADFGRK                  | 10  | 3284   | 1.47 | 0.12 | 8  |
| 1 K02F2.2  | VAVVAGYGDVGK             | 34  | 2843   | 1.47 | 0.19 | 13 |
| 7 K02F2.2  | VPAINVNDSVTK             | 42  | 55371  | 1.47 | 0.27 | 18 |
| 22 K02F2.2 | VAVVAGYGDVGK             | 116 | 4992   | 1.47 | 0.06 | 4  |
| 1 K02F2.2  | VAVVAGYGDVGK             | 61  | 3761   | 1.51 | 0.12 | 8  |
| 7 K02F2.2  | VAVVAGYGDVGK             | 39  | 2315   | 1.52 | 0.21 | 14 |
| 22 K02F2.2 | EIILAENEMPGLMAMRSK       | 44  | 2298   | 1.52 | 0.26 | 17 |
| 22 K02F2.2 | RATDVMLAGK               | 27  | 1370   | 1.53 | 0.16 | 11 |
| 22 K02F2.2 | FDONLYGIRESLPDGIK        | 10  | 1281   | 1.55 | 0.06 | 4  |
| 10 K02F2.2 | LADFGRK                  | 24  | 3015   | 1.56 | 0.17 | 11 |
| 1 K02F2.2  | VAVVAGYGDVGK             | 68  | 3307   | 1.57 | 0.10 | 6  |
| 1 K02F2.2  | VAVVAGYGDVGK             | 54  | 1431   | 1.57 | 0.16 | 10 |
| 10 K02F2.2 | YPQYLAGIRGLSEETTTGVHNLAK | 29  | 4032   | 1.58 | 0.17 | 11 |
| 10 K02F2.2 | RATDVMLAGK               | 25  | 5635   | 1.58 | 0.17 | 11 |
| 22 K02F2.2 | VPAINVNDSVTK             | 13  | 2116   | 1.58 | 0.11 | 7  |
| 10 K02F2.2 | VAVVAGYGDVGK             | 42  | 8972   | 1.59 | 0.09 | 6  |
| 7 K02F2.2  | RATDVMLAGK               | 11  | 1234   | 1.60 | 0.13 | 8  |
| 1 K02F2.2  | VAVVAGYGDVGK             | 97  | 4318   | 1.61 | 0.18 | 11 |
| 7 K02F2.2  | RATDVMLAGK               | 18  | 1628   | 1.63 | 0.19 | 11 |
| 22 K02F2.2 | DGQPLNMILDDGGDLTNLVHAK   | 21  | 3115   | 1.64 | 0.26 | 16 |
| 22 K02F2.2 | LADFGRK                  | 24  | 2940   | 1.64 | 0.11 | 7  |
| 10 K02F2.2 | LGLYVLPK                 | 36  | 6783   | 1.64 | 0.10 | 6  |
| 22 K02F2.2 | RATDVMLAGK               | 22  | 9680   | 1.65 | 0.15 | 9  |
| 10 K02F2.2 | RATDVMLAGK               | 28  | 3983   | 1.65 | 0.14 | 8  |
| 1 K02F2.2  | RATDVMLAGK               | 22  | 3583   | 1.66 | 0.09 | 5  |
| 10 K02F2.2 | LADFGRK                  | 20  | 2878   | 1.67 | 0.20 | 12 |
| 7 K02F2.2  | VAVVAGYGDVGK             | 22  | 1660   | 1.70 | 0.10 | 6  |
| 10 K02F2.2 | LADFGRK                  | 19  | 5315   | 1.71 | 0.13 | 8  |
| 7 K02F2.2  | VAVVAGYGDVGK             | 27  | 1328   | 1.72 | 0.14 | 8  |
| 7 K02F2.2  | VAVVAGYGDVGK             | 53  | 5190   | 1.74 | 0.11 | 7  |
| 10 K02F2.2 | RATDVMLAGK               | 68  | 56546  | 1.74 | 0.10 | 6  |
| 22 K02F2.2 | LADFGRK                  | 28  | 4016   | 1.75 | 0.19 | 11 |
| 1 K02F2.2  | VAVVAGYGDVGK             | 39  | 1020   | 1.76 | 0.19 | 11 |
| 7 K02F2.2  | EIILAENEMPGLMAMRSK       | 11  | 2296   | 1.77 | 0.18 | 10 |
| 22 K02F2.2 | TLDEEVAYLHLAQLGVK        | 134 | 9721   | 1.78 | 0.09 | 5  |
| 7 K02F2.2  | RATDVMLAGK               | 11  | 1420   | 1.82 | 0.14 | 7  |
| 10 K02F2.2 | VAVVAGYGDVGK             | 16  | 651    | 1.82 | 0.10 | 5  |
| 1 K02F2.2  | LADFGRK                  | 11  | 2867   | 1.87 | 0.20 | 11 |
| 7 K02F2.2  | VAVVAGYGDVGK             | 39  | 2300   | 1.89 | 0.11 | 6  |
| 7 K02F2.2  | VAVVAGYGDVGK             | 17  | 1269   | 1.90 | 0.09 | 5  |
| 22 K02F2.2 | TLDEEVAYLHLAQLGVK        | 119 | 6517   | 1.91 | 0.12 | 6  |
| 10 K02F2.2 | VAVVAGYGDVGK             | 31  | 1801   | 1.92 | 0.23 | 12 |
| 10 K02F2.2 | RATDVMLAGK               | 20  | 2842   | 1.92 | 0.13 | 7  |
| 1 K02F2.2  | VAVVAGYGDVGK             | 91  | 2832   | 1.92 | 0.10 | 5  |
| 10 K02F2.2 | VAVVAGYGDVGK             | 98  | 13035  | 1.93 | 0.12 | 6  |
| 10 K02F2.2 | VAVVAGYGDVGK             | 13  | 1103   | 1.93 | 0.19 | 10 |
| 7 K02F2.2  | RATDVMLAGK               | 27  | 1946   | 1.94 | 0.09 | 5  |
| 7 K02F2.2  | RATDVMLAGK               | 16  | 1580   | 1.95 | 0.11 | 6  |
| 7 K02F2.2  | RATDVMLAGK               | 10  | 1488   | 1.97 | 0.20 | 10 |
| 7 K02F2.2  | ANIIVTTTGCK              | 14  | 804    | 1.98 | 0.15 | 8  |
| 1 K02F2.2  | TLDEEVAYLHLAQLGVK        | 94  | 2820   | 1.99 | 0.17 | 9  |
| 10 K02F2.2 | LGLYVLPK                 | 29  | 3597   | 1.99 | 0.16 | 8  |

|             |                                     |    |        |      |      |    |
|-------------|-------------------------------------|----|--------|------|------|----|
| 7 K02F2.2   | YPQYLAGIRGLSEETTTGVHNLAK            | 28 | 2059   | 2.00 | 0.21 | 10 |
| 22 K02F2.2  | EIILAENEMPGLMAMRSK                  | 19 | 4695   | 2.01 | 0.18 | 9  |
| 22 K02F2.2  | VPAINVNDSVTK                        | 65 | 240794 | 2.07 | 0.11 | 5  |
| 22 K02F2.2  | VPAINVNDSVTK                        | 55 | 116193 | 2.07 | 0.14 | 7  |
| 10 K02F2.2  | YPQYLAGIRGLSEETTTGVHNLAK            | 28 | 3466   | 2.09 | 0.16 | 7  |
| 1 K02F2.2   | VAVVAGYGDVGK                        | 59 | 3514   | 2.10 | 0.15 | 7  |
| 22 K02F2.2  | RATDVMLAGK                          | 59 | 199485 | 2.11 | 0.11 | 5  |
| 10 K02F2.2  | RATDVMLAGK                          | 22 | 7009   | 2.14 | 0.05 | 2  |
| 7 K02F2.2   | ANIIVTTTGCK                         | 16 | 1026   | 2.16 | 0.10 | 5  |
| 22 K02F2.2  | LADFGRK                             | 10 | 2401   | 2.21 | 0.11 | 5  |
| 1 K02F2.2   | TLDEEVAYLHLAQLGVK                   | 79 | 1948   | 2.22 | 0.09 | 4  |
| 7 K02F2.2   | YPQYLAGIRGLSEETTTGVHNLAK            | 52 | 4280   | 2.24 | 0.21 | 9  |
| 1 K02F2.2   | LADFGRK                             | 25 | 8730   | 2.25 | 0.12 | 5  |
| 10 K02F2.2  | YPQYLAGIRGLSEETTTGVHNLAK            | 34 | 7906   | 2.25 | 0.22 | 10 |
| 1 K02F2.2   | VAVVAGYGDVGK                        | 70 | 3289   | 2.30 | 0.12 | 5  |
| 10 K02F2.2  | VAVVAGYGDVGK                        | 14 | 793    | 2.32 | 0.44 | 19 |
| 7 K02F2.2   | VAVVAGYGDVGK                        | 67 | 1492   | 2.34 | 0.21 | 9  |
| 7 K02F2.2   | RATDVMLAGK                          | 49 | 2390   | 2.34 | 0.17 | 7  |
| 7 K02F2.2   | RATDVMLAGK                          | 22 | 3050   | 2.45 | 0.13 | 5  |
| 10 K02F2.2  | FDNLYGIRESLPDGIK                    | 26 | 5811   | 2.48 | 0.20 | 8  |
| 7 K02F2.2   | LADFGRK                             | 19 | 4295   | 2.49 | 0.15 | 6  |
| 10 K02F2.2  | VAVVAGYGDVGK                        | 29 | 1633   | 2.50 | 0.13 | 5  |
| 7 K02F2.2   | VAVVAGYGDVGK                        | 79 | 2975   | 2.55 | 0.13 | 5  |
| 22 K02F2.2  | VAVVAGYGDVGK                        | 39 | 2040   | 2.60 | 0.22 | 8  |
| 7 K02F2.2   | ANIIVTTTGCK                         | 20 | 883    | 2.60 | 0.16 | 6  |
| 10 K02F2.2  | TLDEEVAYLHLAQLGVK                   | 62 | 24233  | 2.77 | 0.14 | 5  |
| 10 K02F2.2  | FDNLYGIRESLPDGIK                    | 40 | 5534   | 2.77 | 0.18 | 7  |
| 10 K02F2.2  | TLDEEVAYLHLAQLGVK                   | 77 | 34462  | 2.83 | 0.16 | 6  |
| 10 K02F2.2  | DGQPLNMILDDGGDLTNLVHAK              | 12 | 12394  | 2.88 | 0.27 | 9  |
| 7 K02F2.2   | RATDVMLAGK                          | 26 | 15933  | 2.91 | 0.15 | 5  |
| 22 K02F2.2  | EIILAENEMPGLMAMRSK                  | 45 | 6178   | 2.93 | 0.09 | 3  |
| 7 K02F2.2   | VAVVAGYGDVGK                        | 25 | 2071   | 2.95 | 0.13 | 4  |
| 22 K02F2.2  | LGLYVLPK                            | 21 | 17911  | 2.97 | 0.05 | 2  |
| 7 K02F2.2   | RATDVMLAGK                          | 30 | 18111  | 3.02 | 0.17 | 5  |
| 10 K02F2.2  | YPQYLAGIRGLSEETTTGVHNLAK            | 23 | 4072   | 3.02 | 0.20 | 7  |
| 22 K02F2.2  | LGLYVLPK                            | 14 | 7425   | 3.10 | 0.16 | 5  |
| 22 K02F2.2  | VAVVAGYGDVGK                        | 63 | 3351   | 3.18 | 0.15 | 5  |
| 7 K02F2.2   | VAVVAGYGDVGK                        | 87 | 2658   | 3.20 | 0.12 | 4  |
| 10 K02F2.2  | LADFGRK                             | 20 | 6761   | 3.23 | 0.10 | 3  |
| 7 K02F2.2   | RATDVMLAGK                          | 20 | 1824   | 3.27 | 0.15 | 5  |
| 1 K02F2.2   | LADFGRK                             | 11 | 2093   | 3.41 | 0.36 | 11 |
| 22 K02F2.2  | RATDVMLAGK                          | 30 | 6053   | 3.57 | 0.12 | 3  |
| 7 K02F2.2   | LADFGRK                             | 14 | 2064   | 3.59 | 0.10 | 3  |
| 10 K02F2.2  | YPQYLAGIRGLSEETTTGVHNLAK            | 35 | 6236   | 3.72 | 0.31 | 8  |
| 22 K02F2.2  | DGQPLNMILDDGGDLTNLVHAK              | 17 | 11190  | 3.98 | 0.34 | 8  |
| 10 K02F2.2  | VAVVAGYGDVGK                        | 64 | 15079  | 4.09 | 0.13 | 3  |
| 10 K02F2.2  | YPQYLAGIRGLSEETTTGVHNLAK            | 40 | 74213  | 4.18 | 0.20 | 5  |
| 22 K02F2.2  | LADFGRK                             | 20 | 9587   | 4.25 | 0.22 | 5  |
| 10 K02F2.2  | AFGSRVIVTEIDPINALQAAMEGYEVTTLEEAAPK | 22 | 1281   | 4.34 | 0.17 | 4  |
| 7 K02F2.2   | LADFGRK                             | 23 | 9016   | 4.44 | 0.19 | 4  |
| 7 K02F2.2   | LADFGRK                             | 16 | 9660   | 4.99 | 0.15 | 3  |
| 10 K02F2.2  | VAVVAGYGDVGK                        | 66 | 11809  | 5.09 | 0.14 | 3  |
| 10 K02F2.2  | YPQYLAGIRGLSEETTTGVHNLAK            | 42 | 75441  | 5.39 | 0.36 | 7  |
| 22 K02F2.2  | VAVVAGYGDVGK                        | 99 | 12779  | 6.85 | 0.10 | 1  |
| 22 K02F2.2  | LADFGRK                             | 16 | 2897   | 6.89 | 0.15 | 2  |
| 7 K02F3.3   | DFTNLVFTVEK                         | 17 | 1148   | 1.05 | 0.14 | 13 |
| 22 K02F6.4  | NFNSSLASDVLK                        | 10 | 3826   | 1.11 | 0.33 | 30 |
| 10 K03A1.5  | FSSLEEFK                            | 24 | 576    | 0.43 | 0.14 | 32 |
| 1 K03A1.5   | AMVHTVGGTLLK                        | 24 | 1837   | 0.72 | 0.29 | 41 |
| 22 K03A1.5  | VLFTVNHVTYK                         | 10 | 2949   | 0.79 | 0.11 | 14 |
| 22 K03A1.5  | VLFTVNHVTYK                         | 13 | 2549   | 0.84 | 0.13 | 16 |
| 22 K03A1.5  | FSSLEEFK                            | 37 | 1781   | 1.00 | 0.10 | 10 |
| 22 K03A1.5  | LHQNYNQVIDHNLK                      | 10 | 12117  | 1.03 | 0.17 | 16 |
| 1 K03A1.5   | LHQNYNQVIDHNLK                      | 17 | 3571   | 1.04 | 0.11 | 11 |
| 22 K03A1.5  | FSSLEEFK                            | 45 | 1886   | 1.08 | 0.11 | 10 |
| 22 K03A1.5  | AMVHTVGGTLLK                        | 27 | 5382   | 1.22 | 0.25 | 21 |
| 10 K03A1.5  | AMVHTVGGTLLK                        | 68 | 7111   | 1.24 | 0.19 | 15 |
| 22 K03A1.5  | FSSLEEFK                            | 31 | 1279   | 1.28 | 0.11 | 9  |
| 10 K03A1.5  | FSSLEEFK                            | 44 | 1810   | 1.36 | 0.14 | 10 |
| 10 K03A1.5  | LHQNYNQVIDHNLK                      | 24 | 10910  | 1.58 | 0.13 | 8  |
| 22 K03A1.5  | AMVHTVGGTLLK                        | 59 | 4778   | 1.61 | 0.24 | 15 |
| 10 K03A1.5  | FSSLEEFK                            | 42 | 1833   | 1.78 | 0.16 | 9  |
| 22 K03A1.5  | HIEEHLVQGDSK                        | 17 | 12846  | 1.90 | 0.12 | 7  |
| 10 K03A1.5  | VLFTVNHVTYK                         | 24 | 2735   | 2.00 | 0.14 | 7  |
| 10 K03A1.5  | LHQNYNQVIDHNLK                      | 19 | 13821  | 2.16 | 0.24 | 11 |
| 22 K03A1.5  | HIEEHLVQGDSK                        | 11 | 13364  | 2.23 | 0.09 | 4  |
| 10 K03A1.5  | FSSLEEFK                            | 34 | 1108   | 2.40 | 0.13 | 5  |
| 10 K03A1.5  | FSSLEEFK                            | 29 | 1041   | 2.51 | 0.10 | 4  |
| 10 K03A1.5  | HIEEHLVQGDSK                        | 22 | 12598  | 3.41 | 0.06 | 2  |
| 22 K04B12.1 | ATAVCDPPRIDK                        | 13 | 2531   | 1.90 | 0.10 | 5  |
| 22 K04D7.1  | DGQAMLWDLNEGK                       | 56 | 3430   | 0.31 | 0.27 | 88 |
| 22 K04D7.1  | DGQAMLWDLNEGK                       | 59 | 3976   | 0.41 | 0.13 | 31 |
| 22 K04D7.1  | DGQAMLWDLNEGK                       | 75 | 2502   | 0.46 | 0.15 | 33 |
| 22 K04D7.1  | DGQAMLWDLNEGK                       | 73 | 3039   | 0.46 | 0.13 | 28 |
| 22 K04D7.1  | DGQAMLWDLNEGK                       | 65 | 3027   | 0.48 | 0.09 | 20 |
| 22 K04D7.1  | DGQAMLWDLNEGK                       | 34 | 1475   | 0.48 | 0.14 | 29 |
| 10 K04D7.1  | DGQAMLWDLNEGK                       | 38 | 4291   | 0.54 | 0.19 | 35 |
| 22 K04D7.1  | DGQAMLWDLNEGK                       | 63 | 2634   | 0.56 | 0.10 | 19 |
| 22 K04D7.1  | DVLSVAFSADNRQIVSGSRDK               | 10 | 2113   | 0.65 | 0.29 | 44 |
| 10 K04D7.1  | DGQAMLWDLNEGK                       | 61 | 4056   | 0.71 | 0.11 | 16 |
| 22 K04D7.1  | VWNLGNCRLK                          | 19 | 5948   | 0.71 | 0.20 | 28 |
| 10 K04D7.1  | TNHIGHTGYVNTVTVSPDGSLCASGGK         | 93 | 12765  | 0.74 | 0.14 | 18 |
| 22 K04D7.1  | VWNLGNCRLK                          | 11 | 1525   | 0.76 | 0.31 | 41 |
| 10 K04D7.1  | TNHIGHTGYVNTVTVSPDGSLCASGGK         | 70 | 9062   | 0.76 | 0.11 | 15 |
| 10 K04D7.1  | DGQAMLWDLNEGK                       | 58 | 4031   | 0.77 | 0.09 | 11 |
| 22 K04D7.1  | VWNLGNCRLK                          | 11 | 2054   | 0.80 | 0.17 | 22 |
| 10 K04D7.1  | TNHIGHTGYVNTVTVSPDGSLCASGGK         | 83 | 11974  | 0.88 | 0.16 | 18 |
| 10 K04D7.1  | TNHIGHTGYVNTVTVSPDGSLCASGGK         | 14 | 2217   | 0.89 | 0.10 | 11 |
| 22 K04D7.1  | DVLSVAFSADNRQIVSGSRDK               | 16 | 2557   | 0.98 | 0.16 | 16 |
| 10 K04D7.1  | TNHIGHTGYVNTVTVSPDGSLCASGGK         | 93 | 10659  | 1.18 | 0.14 | 12 |
| 7 K04D7.1   | DGQAMLWDLNEGK                       | 30 | 2829   | 1.28 | 0.15 | 11 |

|                      |                              |    |       |       |      |     |
|----------------------|------------------------------|----|-------|-------|------|-----|
| 22 K04D7.1           | VWNLGNCRLK                   | 18 | 6380  | 1.38  | 0.21 | 15  |
| 7 K04D7.1            | VWNLGNCRLK                   | 18 | 1382  | 1.41  | 0.13 | 9   |
| 10 K04D7.1           | TTVLSSSRDK                   | 24 | 7696  | 1.45  | 0.24 | 16  |
| 10 K04D7.1           | TTVLSSSRDK                   | 20 | 7060  | 1.51  | 0.14 | 9   |
| 22 K04D7.1           | TNHIGHTGYVNTVTVSPDGS LCASGGK | 25 | 2805  | 1.55  | 0.21 | 14  |
| 22 K04D7.1           | TTVLSSSRDK                   | 10 | 6100  | 1.69  | 0.30 | 18  |
| 10 K04D7.1           | TTVLSSSRDK                   | 15 | 5008  | 1.72  | 0.23 | 13  |
| 22 K04D7.1           | TNHIGHTGYVNTVTVSPDGS LCASGGK | 69 | 6884  | 1.74  | 0.12 | 7   |
| 10 K04D7.1           | TTVLSSSRDK                   | 21 | 5810  | 1.86  | 0.14 | 8   |
| 7 K04D7.1            | TNHIGHTGYVNTVTVSPDGS LCASGGK | 12 | 2160  | 1.91  | 0.10 | 5   |
| 22 K04D7.1           | TTVLSSSRDK                   | 11 | 1957  | 1.93  | 0.22 | 11  |
| 22 K04D7.1           | TNHIGHTGYVNTVTVSPDGS LCASGGK | 77 | 11318 | 1.96  | 0.16 | 8   |
| 7 K04D7.1            | TNHIGHTGYVNTVTVSPDGS LCASGGK | 59 | 5948  | 2.02  | 0.08 | 4   |
| 22 K04D7.1           | TTVLSSSRDK                   | 28 | 6651  | 2.08  | 0.16 | 8   |
| 7 K04D7.1            | TNHIGHTGYVNTVTVSPDGS LCASGGK | 56 | 6680  | 2.22  | 0.08 | 4   |
| 22 K04D7.1           | TTVLSSSRDK                   | 23 | 1873  | 2.44  | 0.11 | 4   |
| 10 K04D7.1           | TTVLSSSRDK                   | 18 | 5842  | 2.96  | 0.12 | 4   |
| 22 K04D7.1           | TTVLSSSRDK                   | 16 | 3143  | 3.28  | 0.09 | 3   |
| 22 K04D7.1           | TTVLSSSRDK                   | 15 | 4343  | 3.47  | 0.15 | 4   |
| 10 K04D7.3           | RLGELQASSGGK                 | 47 | 7394  | 0.05  | 0.32 | 639 |
| 10 K04D7.3           | HLDLTFD LLDK                 | 48 | 6511  | 0.08  | 0.17 | 209 |
| 7 K04D7.3            | RLGELQASSGGK                 | 60 | 2646  | 0.09  | 0.20 | 217 |
| 10 K04D7.3           | HLDLTFD LLDK                 | 64 | 8914  | 0.12  | 0.30 | 262 |
| 10 K04D7.3           | RDGLIEQSREVGA EFQK           | 26 | 8914  | 0.18  | 0.34 | 188 |
| 7 K04D7.3            | VDIPAFDWPIAK                 | 10 | 865   | 0.48  | 0.06 | 12  |
| 22 K04D7.3           | RDGLIEQSREVGA EFQK           | 31 | 2823  | 0.48  | 0.22 | 47  |
| 10 K04D7.3           | LDQARGRGTFAAVDFPSGSLRDK      | 21 | 9500  | 0.55  | 0.36 | 66  |
| 22 K04D7.3           | RDGLIEQSREVGA EFQK           | 16 | 5893  | 0.55  | 0.18 | 33  |
| 10 K04D7.3           | RDGLIEQSREVGA EFQK           | 12 | 6252  | 0.58  | 0.24 | 41  |
| 10 K04D7.3           | VDIPAFDWPIAK                 | 13 | 1267  | 0.61  | 0.16 | 27  |
| 22 K04D7.3           | LDQARGRGTFAAVDFPSGSLRDK      | 12 | 15199 | 0.61  | 0.15 | 25  |
| 22 K04D7.3           | LDQARGRGTFAAVDFPSGSLRDK      | 12 | 31734 | 0.61  | 0.28 | 46  |
| 10 K04D7.3           | RDGLIEQSREVGA EFQK           | 11 | 6385  | 0.64  | 0.09 | 13  |
| 22 K04D7.3           | RDGLIEQSREVGA EFQK           | 15 | 1891  | 0.65  | 0.17 | 27  |
| 10 K04D7.3           | HLDLTFD LLDK                 | 46 | 1451  | 0.65  | 0.13 | 20  |
| 10 K04D7.3           | HLDLTFD LLDK                 | 47 | 1579  | 0.67  | 0.06 | 10  |
| 22 K04D7.3           | RLGELQASSGGK                 | 33 | 1282  | 0.74  | 0.21 | 29  |
| 10 K04D7.3           | HLDLTFD LLDK                 | 69 | 2933  | 0.78  | 0.16 | 20  |
| 7 K04D7.3            | RLGELQASSGGK                 | 57 | 4321  | 0.84  | 0.07 | 8   |
| 22 K04D7.3           | LLTGGYFYGEHLRVK              | 11 | 5646  | 0.88  | 0.10 | 11  |
| 10 K04D7.3           | HLDLTFD LLDK                 | 61 | 3496  | 0.89  | 0.07 | 8   |
| 7 K04D7.3            | RLGELQASSGGK                 | 61 | 4463  | 0.92  | 0.10 | 11  |
| 1 K04D7.3            | RDGLIEQSREVGA EFQK           | 19 | 4646  | 1.02  | 0.12 | 12  |
| 1 K04D7.3            | HLDLTFD LLDK                 | 36 | 968   | 1.07  | 0.17 | 16  |
| 10 K04D7.3           | RLGELQASSGGK                 | 50 | 2982  | 1.09  | 0.09 | 9   |
| 1 K04D7.3            | HLDLTFD LLDK                 | 34 | 982   | 1.16  | 0.19 | 16  |
| 7 K04D7.3            | LLTGGYFYGEHLRVK              | 11 | 1944  | 1.19  | 0.25 | 21  |
| 1 K04D7.3            | HLDLTFD LLDK                 | 52 | 1231  | 1.34  | 0.17 | 13  |
| 1 K04D7.3            | RLGELQASSGGK                 | 60 | 6792  | 1.44  | 0.19 | 13  |
| 1 K04D7.3            | RLGELQASSGGK                 | 57 | 6030  | 1.44  | 0.12 | 8   |
| 1 K04D7.3            | HLDLTFD LLDK                 | 29 | 670   | 1.47  | 0.08 | 6   |
| 10 K04D7.3           | RLGELQASSGGK                 | 63 | 9530  | 1.48  | 0.55 | 37  |
| 1 K04D7.3            | HLDLTFD LLDK                 | 21 | 802   | 1.58  | 0.17 | 11  |
| 22 K04D7.3           | HLDLTFD LLDK                 | 27 | 2737  | 1.67  | 0.21 | 12  |
| 22 K04D7.3           | RLGELQASSGGK                 | 59 | 9291  | 1.70  | 0.13 | 8   |
| 7 K04D7.3            | HLDLTFD LLDK                 | 47 | 3288  | 1.84  | 0.15 | 8   |
| 7 K04D7.3            | RLGELQASSGGK                 | 56 | 11548 | 1.85  | 0.09 | 5   |
| 7 K04D7.3            | RLGELQASSGGK                 | 44 | 6540  | 1.89  | 0.16 | 8   |
| 22 K04D7.3           | RLGELQASSGGK                 | 55 | 7545  | 1.96  | 0.06 | 3   |
| 22 K04D7.3           | HLDLTFD LLDK                 | 39 | 2802  | 2.05  | 0.23 | 11  |
| 10 K04D7.3           | RLGELQASSGGK                 | 47 | 8999  | 2.08  | 0.14 | 7   |
| 10 K04D7.3           | RLGELQASSGGK                 | 52 | 6041  | 2.48  | 0.12 | 5   |
| 7 K04D7.3            | HLDLTFD LLDK                 | 28 | 1307  | 2.57  | 0.18 | 7   |
| 7 K04D7.3            | RDGLIEQSREVGA EFQK           | 22 | 4170  | 6.86  | 0.37 | 5   |
| 7 K04D7.3            | HLDLTFD LLDK                 | 69 | 4681  | 50.04 | 0.15 | 0   |
| 10 K04G2.1           | QFESVLRK                     | 29 | 4299  | 1.19  | 0.19 | 16  |
| 1 K04G7.4a;K04G7.4b  | NYIGHEYFK                    | 15 | 4441  | 0.88  | 0.16 | 18  |
| 1 K04G7.4a;K04G7.4b  | HNGFN YIDGLK                 | 68 | 1982  | 1.08  | 0.11 | 10  |
| 22 K04G7.4a;K04G7.4b | NYIGHEYFK                    | 13 | 9163  | 1.14  | 0.10 | 9   |
| 1 K04G7.4a;K04G7.4b  | HNGFN YIDGLK                 | 85 | 1842  | 1.27  | 0.13 | 10  |
| 7 K05C4.1            | IRLPPMDVSK                   | 12 | 1442  | 0.95  | 0.17 | 18  |
| 7 K05C4.1            | GGIIVAVDSRASSGEYISSK         | 55 | 1962  | 1.00  | 0.15 | 15  |
| 7 K05C4.1            | IRLPPMDVSK                   | 10 | 1889  | 1.01  | 0.12 | 12  |
| 7 K05C4.1            | GGIIVAVDSRASSGEYISSK         | 69 | 1864  | 1.03  | 0.18 | 17  |
| 22 K05C4.1           | IRLPPMDVSK                   | 13 | 1329  | 1.06  | 0.14 | 13  |
| 7 K05C4.1            | IRLPPMDVSK                   | 19 | 2641  | 1.06  | 0.07 | 6   |
| 7 K05C4.1            | GGIIVAVDSRASSGEYISSK         | 11 | 1006  | 1.17  | 0.23 | 20  |
| 7 K05C4.1            | IRLPPMDVSK                   | 12 | 1760  | 1.18  | 0.06 | 5   |
| 1 K05C4.1            | IRLPPMDVSK                   | 13 | 1942  | 1.43  | 0.08 | 6   |
| 22 K05C4.1           | TSITVSAASK                   | 47 | 7046  | 1.53  | 0.14 | 9   |
| 7 K05C4.1            | TSITVSAASK                   | 50 | 5946  | 2.04  | 0.12 | 6   |
| 1 K05C4.1            | IRLPPMDVSK                   | 13 | 1661  | 2.43  | 0.18 | 8   |
| 22 K06A4.5           | EFIYDHISEVK                  | 54 | 2772  | 0.47  | 0.23 | 49  |
| 10 K06A4.5           | EFIYDHISEVK                  | 49 | 4905  | 0.52  | 0.08 | 15  |
| 10 K06A4.5           | EFIYDHISEVK                  | 39 | 4407  | 0.59  | 0.14 | 24  |
| 22 K06A4.5           | EFIYDHISEVK                  | 54 | 3038  | 0.69  | 0.30 | 43  |
| 1 K06A5.6            | LFASQVATTATSK                | 53 | 2133  | 0.63  | 0.18 | 29  |
| 10 K06A5.6           | SSILGEYGK                    | 23 | 10133 | 0.96  | 0.10 | 10  |
| 10 K06A5.6           | SSILGEYGK                    | 13 | 4982  | 1.01  | 0.20 | 20  |
| 22 K06A5.6           | QNGLPFVREAAMAK               | 34 | 2656  | 1.11  | 0.09 | 8   |
| 10 K06A5.6           | SSILGEYGK                    | 13 | 2260  | 1.16  | 0.32 | 27  |
| 10 K06A5.6           | LFASQVATTATSK                | 55 | 2800  | 1.61  | 0.14 | 9   |
| 10 K06A5.6           | SSILGEYGK                    | 12 | 2268  | 1.77  | 0.17 | 9   |
| 7 K06G5.1a;K06G5.1b  | ITFTTVADSGTTK                | 63 | 1745  | 1.59  | 0.31 | 20  |
| 10 K07A1.12          | SPHADVYIFDYLK                | 61 | 2452  | 1.02  | 0.14 | 14  |
| 10 K07A1.12          | SPHADVYIFDYLK                | 30 | 1831  | 1.08  | 0.15 | 14  |
| 10 K07A1.12          | RLHVVDLSK                    | 12 | 7473  | 2.37  | 0.20 | 8   |
| 7 K07A1.2            | HFIDVGAGVIDSDYRGEVK          | 12 | 9268  | 0.87  | 0.14 | 16  |
| 7 K07A1.2            | HFIDVGAGVIDSDYRGEVK          | 13 | 4075  | 0.93  | 0.09 | 9   |
| 7 K07A1.2            | HFIDVGAGVIDSDYRGEVK          | 13 | 10513 | 1.07  | 0.15 | 14  |
| 7 K07A1.2            | HFIDVGAGVIDSDYRGEVK          | 15 | 7390  | 1.26  | 0.11 | 9   |

|                               |                        |     |       |       |      |     |
|-------------------------------|------------------------|-----|-------|-------|------|-----|
| 10 K07A1.2                    | HFIDVGAGVIDSDYRGEVK    | 11  | 10715 | 1.73  | 0.22 | 13  |
| 10 K07A12.7                   | RLEELHEK               | 14  | 3277  | 0.27  | 0.35 | 128 |
| 22 K07A12.7                   | AADNLILEK              | 31  | 3568  | 0.61  | 0.11 | 18  |
| 22 K07A12.7                   | IGSERDLGLK             | 12  | 3737  | 0.73  | 0.30 | 41  |
| 7 K07A12.7                    | ISYHVPK                | 12  | 3397  | 0.90  | 0.17 | 18  |
| 22 K07A12.7                   | TEFGLPRIEK             | 15  | 1259  | 0.93  | 0.21 | 22  |
| 7 K07A12.7                    | ISYHVPK                | 26  | 5671  | 1.36  | 0.14 | 10  |
| 22 K07A12.7                   | ISYHVPK                | 32  | 4598  | 1.44  | 0.07 | 5   |
| 10 K07A12.7                   | ISYHVPK                | 37  | 8487  | 1.51  | 0.12 | 8   |
| 22 K07A12.7                   | ISYHVPK                | 14  | 3710  | 1.86  | 0.10 | 5   |
| 22 K07A3.1                    | ERILDIQPTQIHQRAPIILGSK | 12  | 7485  | 0.35  | 0.14 | 42  |
| 10 K07A3.1                    | LDVEEALEYLAK           | 57  | 2654  | 0.35  | 0.22 | 64  |
| 10 K07A3.1                    | LDVEEALEYLAK           | 81  | 2719  | 0.40  | 0.15 | 38  |
| 22 K07A3.1                    | LYGIAGATNVQGEEVK       | 107 | 9681  | 0.45  | 0.16 | 35  |
| 1 K07A3.1                     | RGDGPATVDDVLKPGK       | 38  | 13888 | 0.46  | 0.26 | 56  |
| 22 K07A3.1                    | ERILDIQPTQIHQRAPIILGSK | 13  | 11766 | 0.51  | 0.22 | 43  |
| 22 K07A3.1                    | ERILDIQPTQIHQRAPIILGSK | 15  | 5557  | 0.52  | 0.21 | 39  |
| 10 K07A3.1                    | LYGIAGATNVQGEEVK       | 95  | 3164  | 0.52  | 0.17 | 33  |
| 7 K07A3.1                     | RGDGPATVDDVLKPGK       | 31  | 17382 | 0.55  | 0.25 | 45  |
| 22 K07A3.1                    | ERILDIQPTQIHQRAPIILGSK | 17  | 14583 | 0.65  | 0.38 | 58  |
| 7 K07A3.1                     | RGDGPATVDDVLKPGK       | 38  | 12774 | 0.66  | 0.24 | 37  |
| 22 K07A3.1                    | ERILDIQPTQIHQRAPIILGSK | 14  | 8538  | 0.66  | 0.13 | 20  |
| 7 K07A3.1                     | RGDGPATVDDVLKPGK       | 38  | 11592 | 0.68  | 0.26 | 38  |
| 22 K07A3.1                    | LYGIAGATNVQGEEVK       | 71  | 5915  | 0.68  | 0.23 | 33  |
| 10 K07A3.1                    | RGDGPATVDDVLKPGK       | 19  | 23440 | 0.70  | 0.21 | 30  |
| 22 K07A3.1                    | RGDGPATVDDVLKPGK       | 25  | 19289 | 0.72  | 0.24 | 34  |
| 10 K07A3.1                    | ERILDIQPTQIHQRAPIILGSK | 19  | 16459 | 0.73  | 0.12 | 17  |
| 7 K07A3.1                     | RGDGPATVDDVLKPGK       | 32  | 21200 | 0.73  | 0.13 | 17  |
| 22 K07A3.1                    | RGDGPATVDDVLKPGK       | 28  | 22613 | 0.80  | 0.21 | 26  |
| 1 K07A3.1                     | LDVEEALEYLAK           | 54  | 692   | 0.85  | 0.16 | 19  |
| 22 K07A3.1                    | ERILDIQPTQIHQRAPIILGSK | 11  | 2082  | 0.87  | 0.28 | 32  |
| 1 K07A3.1                     | LYGIAGATNVQGEEVK       | 93  | 3096  | 0.88  | 0.12 | 14  |
| 10 K07A3.1                    | RGDGPATVDDVLKPGK       | 26  | 20499 | 0.88  | 0.10 | 12  |
| 1 K07A3.1                     | LYGIAGATNVQGEEVK       | 100 | 3017  | 0.89  | 0.18 | 20  |
| 10 K07A3.1                    | LYGIAGATNVQGEEVK       | 78  | 5946  | 0.91  | 0.18 | 19  |
| 7 K07A3.1                     | RGDGPATVDDVLKPGK       | 34  | 8935  | 0.94  | 0.28 | 30  |
| 7 K07A3.1                     | GSYISLNEG YAQTWSK      | 76  | 1303  | 0.94  | 0.29 | 31  |
| 7 K07A3.1                     | ERILDIQPTQIHQRAPIILGSK | 15  | 4814  | 0.96  | 0.14 | 15  |
| 1 K07A3.1                     | GFAEYIRTRK             | 11  | 4818  | 0.98  | 0.13 | 14  |
| 10 K07A3.1                    | RGDGPATVDDVLKPGK       | 34  | 18685 | 0.98  | 0.26 | 26  |
| 10 K07A3.1                    | ERILDIQPTQIHQRAPIILGSK | 18  | 8649  | 1.01  | 0.20 | 19  |
| 1 K07A3.1                     | LYGIAGATNVQGEEVK       | 80  | 4267  | 1.04  | 0.13 | 13  |
| 1 K07A3.1                     | LDVEEALEYLAK           | 61  | 1186  | 1.07  | 0.18 | 17  |
| 10 K07A3.1                    | LYGIAGATNVQGEEVK       | 69  | 6049  | 1.16  | 0.09 | 8   |
| 1 K07A3.1                     | LYGIAGATNVQGEEVK       | 56  | 3036  | 1.17  | 0.14 | 12  |
| 7 K07A3.1                     | LYGIAGATNVQGEEVK       | 91  | 4486  | 1.20  | 0.24 | 20  |
| 22 K07A3.1                    | RGDGPATVDDVLKPGK       | 33  | 10831 | 1.25  | 0.50 | 41  |
| 7 K07A3.1                     | LYGIAGATNVQGEEVK       | 92  | 7905  | 1.31  | 0.14 | 11  |
| 10 K07A3.1                    | LYGIAGATNVQGEEVK       | 30  | 3943  | 1.48  | 0.20 | 13  |
| 22 K07A3.1                    | GFAEYIRTRK             | 10  | 5150  | 1.54  | 0.11 | 7   |
| 10 K07A3.1                    | LYGIAGATNVQGEEVK       | 98  | 2544  | 4.28  | 0.18 | 4   |
| 10 K07A3.1                    | LYGIAGATNVQGEEVK       | 84  | 2272  | 7.24  | 0.20 | 3   |
| 10 K07A3.1                    | RGDGPATVDDVLKPGK       | 26  | 5475  | 9.16  | 0.25 | 3   |
| 10 K07A3.1                    | GFAEYIRTRK             | 13  | 4727  | 12.83 | 0.41 | 3   |
| 7 K07C5.1                     | IRIEAPPSRK             | 10  | 11638 | 1.19  | 0.24 | 20  |
| 1 K07D4.3                     | RHIADEVSK              | 36  | 9483  | 2.84  | 0.17 | 6   |
| 22 K07D4.3                    | RHIADEVSK              | 11  | 1383  | 3.64  | 0.16 | 5   |
| 7 K07D4.3                     | RHIADEVSK              | 30  | 4395  | 4.48  | 0.24 | 5   |
| 10 K07E12.1a                  | VHWIK                  | 12  | 863   | 0.90  | 0.08 | 9   |
| 22 K07E12.1a                  | VHWIK                  | 12  | 5355  | 1.92  | 0.07 | 4   |
| 7 K07E12.1a                   | VHWIK                  | 17  | 3590  | 4.87  | 0.15 | 3   |
| 22 K07E12.1a                  | VHWIK                  | 21  | 6304  | 7.15  | 0.10 | 1   |
| 22 K07E12.1a                  | VHWIK                  | 16  | 4301  | 7.20  | 0.10 | 1   |
| 1 K07E12.1a;K07E12.1b         | VHWIK                  | 21  | 31964 | 2.52  | 0.07 | 3   |
| 1 K07E12.1a;K07E12.1b         | VHWIK                  | 14  | 904   | 2.91  | 0.15 | 5   |
| 1 K07E12.1a;K07E12.1b         | VHWIK                  | 25  | 36249 | 2.97  | 0.08 | 3   |
| 22 K07E3.3                    | VAEIVSGLEYSK           | 63  | 2670  | 0.63  | 0.11 | 18  |
| 22 K07E3.3                    | IYGDVDTEAAK            | 40  | 2406  | 0.68  | 0.11 | 16  |
| 22 K07E3.3                    | VAEIVSGLEYSK           | 57  | 2020  | 0.71  | 0.20 | 29  |
| 22 K07E3.3                    | VAEIVSGLEYSK           | 45  | 1614  | 0.72  | 0.22 | 30  |
| 7 K07E3.3                     | IYGDVDTEAAK            | 33  | 3207  | 0.74  | 0.09 | 12  |
| 22 K07E3.3                    | VAEIVSGLEYSK           | 91  | 2815  | 0.74  | 0.12 | 16  |
| 7 K07E3.3                     | IYGDVDTEAAK            | 24  | 1307  | 0.86  | 0.24 | 28  |
| 22 K07E3.3                    | HEIDADSVIDLIDPLK       | 24  | 1090  | 0.88  | 0.18 | 21  |
| 22 K07E3.3                    | VLHDVGGQK              | 26  | 4424  | 0.93  | 0.21 | 23  |
| 7 K07E3.3                     | VLHDVGGQK              | 22  | 5547  | 0.98  | 0.09 | 9   |
| 22 K07E3.3                    | HEIDADSVIDLIDPLK       | 16  | 1224  | 1.10  | 0.14 | 13  |
| 7 K07E3.3                     | VAEIVSGLEYSK           | 86  | 1899  | 1.10  | 0.21 | 19  |
| 7 K07E3.3                     | VLHDVGGQK              | 22  | 2985  | 1.22  | 0.14 | 11  |
| 10 K07E3.3                    | VAEIVSGLEYSK           | 66  | 1640  | 1.25  | 0.12 | 10  |
| 7 K07E3.3                     | VAEIVSGLEYSK           | 68  | 1205  | 1.63  | 0.20 | 12  |
| 1 K07E3.3                     | VAEIVSGLEYSK           | 66  | 1233  | 1.90  | 0.21 | 11  |
| 22 K07E3.4a;K07E3.4b          | EIYGADGIELSDEAK        | 31  | 1390  | 0.63  | 0.12 | 18  |
| 10 K07E3.4a;K07E3.4b          | HEYLDENIPLVEGGCDSNLRK  | 24  | 3070  | 0.73  | 0.18 | 24  |
| 22 K07E3.4a;K07E3.4b          | VSLDILDRLSEVK          | 15  | 1537  | 0.90  | 0.26 | 29  |
| 22 K07E3.4a;K07E3.4b          | EIYGADGIELSDEAK        | 53  | 1619  | 0.90  | 0.15 | 17  |
| 10 K07E3.4a;K07E3.4b          | THLSLSSDPTK            | 22  | 12750 | 2.27  | 0.10 | 4   |
| 10 K07E3.4a;K07E3.4b          | THLSLSSDPTK            | 25  | 11118 | 2.71  | 0.13 | 5   |
| 22 K07E3.4a;K07E3.4b          | THLSLSSDPTK            | 16  | 5046  | 2.97  | 0.08 | 3   |
| 22 K07E3.4a;K07E3.4b          | THLSLSSDPTK            | 26  | 5125  | 3.24  | 0.09 | 3   |
| 10 K07E8.3                    | EPNNVILLHNK            | 22  | 3646  | 0.95  | 0.12 | 12  |
| 10 K07H8.6a;K07H8.6c;K07H8.6b | LVQQFESAstryek         | 36  | 3227  | 0.09  | 0.19 | 203 |
| 22 K07H8.6a;K07H8.6c;K07H8.6b | TLANAGLDLSVYPLEK       | 49  | 1261  | 0.11  | 0.14 | 122 |
| 10 K07H8.6a;K07H8.6c;K07H8.6b | LVQQFESAstryek         | 45  | 3449  | 0.12  | 0.23 | 196 |
| 10 K07H8.6a;K07H8.6c;K07H8.6b | LVQQFESAstryek         | 16  | 3577  | 0.13  | 0.30 | 228 |
| 22 K07H8.6a;K07H8.6c;K07H8.6b | TLANAGLDLSVYPLEK       | 70  | 1973  | 0.13  | 0.15 | 114 |
| 10 K07H8.6a;K07H8.6c;K07H8.6b | TQIRGEELK              | 25  | 7990  | 0.15  | 0.46 | 311 |
| 10 K07H8.6a;K07H8.6c;K07H8.6b | YLRQLPQWTENK           | 29  | 2164  | 0.15  | 0.17 | 112 |
| 7 K07H8.6a;K07H8.6c;K07H8.6b  | LLSNVQEK               | 32  | 1917  | 0.16  | 0.27 | 168 |
| 22 K07H8.6a;K07H8.6c;K07H8.6b | GLEQIVVRGK             | 49  | 6210  | 0.16  | 0.13 | 84  |
| 10 K07H8.6a;K07H8.6c;K07H8.6b | QIEQGAELEAAHTVARIVK    | 23  | 6084  | 0.16  | 0.43 | 270 |

|                               |                        |    |       |      |      |     |
|-------------------------------|------------------------|----|-------|------|------|-----|
| 7 K07H8.6a;K07H8.6c;K07H8.6b  | LLSNVQEK               | 36 | 2253  | 0.16 | 0.18 | 111 |
| 22 K07H8.6a;K07H8.6c;K07H8.6b | LVQQFESASTRYEK         | 32 | 1315  | 0.16 | 0.12 | 75  |
| 10 K07H8.6a;K07H8.6c;K07H8.6b | YLRQLPQWTENK           | 30 | 2711  | 0.16 | 0.12 | 75  |
| 10 K07H8.6a;K07H8.6c;K07H8.6b | LLSNVQEK               | 31 | 7449  | 0.17 | 0.21 | 126 |
| 7 K07H8.6a;K07H8.6c;K07H8.6b  | LLSNVQEK               | 42 | 1592  | 0.17 | 0.36 | 213 |
| 22 K07H8.6a;K07H8.6c;K07H8.6b | GLEQIVVRGK             | 37 | 5059  | 0.18 | 0.13 | 74  |
| 22 K07H8.6a;K07H8.6c;K07H8.6b | YLRQLPQWTENK           | 26 | 1494  | 0.19 | 0.30 | 158 |
| 10 K07H8.6a;K07H8.6c;K07H8.6b | LLSNVQEK               | 43 | 3831  | 0.19 | 0.22 | 112 |
| 7 K07H8.6a;K07H8.6c;K07H8.6b  | ATIQYVYPQTPRTVEELK     | 10 | 2082  | 0.20 | 0.15 | 74  |
| 22 K07H8.6a;K07H8.6c;K07H8.6b | ATIQYVYPQTPRTVEELK     | 29 | 6270  | 0.20 | 0.23 | 118 |
| 10 K07H8.6a;K07H8.6c;K07H8.6b | LLSNVQEK               | 43 | 4104  | 0.20 | 0.18 | 90  |
| 10 K07H8.6a;K07H8.6c;K07H8.6b | YLRQLPQWTENK           | 17 | 3087  | 0.20 | 0.33 | 161 |
| 10 K07H8.6a;K07H8.6c;K07H8.6b | GLEQIVVRGK             | 40 | 13566 | 0.21 | 0.05 | 26  |
| 10 K07H8.6a;K07H8.6c;K07H8.6b | GLEQIVVRGK             | 23 | 6360  | 0.22 | 0.14 | 62  |
| 10 K07H8.6a;K07H8.6c;K07H8.6b | GLEQIVVRGK             | 33 | 10851 | 0.22 | 0.27 | 124 |
| 22 K07H8.6a;K07H8.6c;K07H8.6b | LLSNVQEK               | 23 | 1505  | 0.22 | 0.32 | 145 |
| 10 K07H8.6a;K07H8.6c;K07H8.6b | YLRQLPQWTENK           | 43 | 2043  | 0.23 | 0.30 | 133 |
| 22 K07H8.6a;K07H8.6c;K07H8.6b | ATIQYVYPQTPRTVEELK     | 36 | 5655  | 0.23 | 0.13 | 57  |
| 10 K07H8.6a;K07H8.6c;K07H8.6b | GLEQIVVRGK             | 58 | 14804 | 0.23 | 0.10 | 45  |
| 10 K07H8.6a;K07H8.6c;K07H8.6b | YLRQLPQWTENK           | 18 | 5671  | 0.23 | 0.28 | 120 |
| 7 K07H8.6a;K07H8.6c;K07H8.6b  | MFSLMAK                | 20 | 1231  | 0.25 | 0.27 | 107 |
| 7 K07H8.6a;K07H8.6c;K07H8.6b  | GLEQIVVRGK             | 33 | 3507  | 0.26 | 0.16 | 63  |
| 22 K07H8.6a;K07H8.6c;K07H8.6b | LVQQFESASTRYEK         | 49 | 2023  | 0.26 | 0.23 | 90  |
| 22 K07H8.6a;K07H8.6c;K07H8.6b | VYQHVAK                | 23 | 10290 | 0.26 | 0.19 | 73  |
| 10 K07H8.6a;K07H8.6c;K07H8.6b | TLANAGLDLSVYPLEK       | 33 | 878   | 0.26 | 0.19 | 74  |
| 10 K07H8.6a;K07H8.6c;K07H8.6b | LVQQFESASTRYEK         | 16 | 460   | 0.26 | 0.32 | 124 |
| 22 K07H8.6a;K07H8.6c;K07H8.6b | YLRQLPQWTENK           | 17 | 1026  | 0.26 | 0.42 | 162 |
| 10 K07H8.6a;K07H8.6c;K07H8.6b | YLRQLPQWTENK           | 33 | 2455  | 0.27 | 0.41 | 149 |
| 22 K07H8.6a;K07H8.6c;K07H8.6b | ATIQYVYPQTPRTVEELK     | 30 | 2437  | 0.28 | 0.18 | 64  |
| 22 K07H8.6a;K07H8.6c;K07H8.6b | FEIKPEVVK              | 23 | 4592  | 0.28 | 0.30 | 106 |
| 22 K07H8.6a;K07H8.6c;K07H8.6b | LLSNVQEK               | 30 | 2107  | 0.29 | 0.23 | 80  |
| 22 K07H8.6a;K07H8.6c;K07H8.6b | QYNIIWLNK              | 43 | 1575  | 0.29 | 0.11 | 39  |
| 10 K07H8.6a;K07H8.6c;K07H8.6b | YLRQLPQWTENK           | 34 | 1722  | 0.29 | 0.31 | 105 |
| 10 K07H8.6a;K07H8.6c;K07H8.6b | EENFQRIEK              | 19 | 1406  | 0.30 | 0.29 | 98  |
| 22 K07H8.6a;K07H8.6c;K07H8.6b | ATIQYVYPQTPRTVEELK     | 36 | 5419  | 0.30 | 0.40 | 135 |
| 10 K07H8.6a;K07H8.6c;K07H8.6b | TLANAGLDLSVYPLEK       | 31 | 1070  | 0.30 | 0.17 | 57  |
| 7 K07H8.6a;K07H8.6c;K07H8.6b  | GLEQIVVRGK             | 28 | 1192  | 0.31 | 0.18 | 59  |
| 22 K07H8.6a;K07H8.6c;K07H8.6b | EENFQRIEK              | 28 | 2459  | 0.31 | 0.11 | 36  |
| 7 K07H8.6a;K07H8.6c;K07H8.6b  | TRFATSQQESNSMK         | 28 | 1140  | 0.32 | 0.13 | 42  |
| 10 K07H8.6a;K07H8.6c;K07H8.6b | LLSNVQEK               | 61 | 3478  | 0.32 | 0.14 | 44  |
| 1 K07H8.6a;K07H8.6c;K07H8.6b  | FEIKPEVVK              | 22 | 3923  | 0.32 | 0.37 | 115 |
| 22 K07H8.6a;K07H8.6c;K07H8.6b | MFSLMAK                | 29 | 2821  | 0.33 | 0.15 | 45  |
| 10 K07H8.6a;K07H8.6c;K07H8.6b | VVIRAIYNTPSEEK         | 56 | 2656  | 0.33 | 0.07 | 22  |
| 10 K07H8.6a;K07H8.6c;K07H8.6b | TRFATSQQESNSMK         | 48 | 1576  | 0.33 | 0.22 | 66  |
| 22 K07H8.6a;K07H8.6c;K07H8.6b | TRFATSQQESNSMK         | 26 | 2658  | 0.33 | 0.11 | 32  |
| 1 K07H8.6a;K07H8.6c;K07H8.6b  | YLRQLPQWTENK           | 40 | 714   | 0.33 | 0.22 | 67  |
| 10 K07H8.6a;K07H8.6c;K07H8.6b | MFSLMAK                | 24 | 5662  | 0.34 | 0.11 | 34  |
| 10 K07H8.6a;K07H8.6c;K07H8.6b | RAVINMLQVNILK          | 22 | 1089  | 0.34 | 0.21 | 63  |
| 1 K07H8.6a;K07H8.6c;K07H8.6b  | TQIRGEELK              | 15 | 7443  | 0.34 | 0.05 | 16  |
| 7 K07H8.6a;K07H8.6c;K07H8.6b  | MFSLMAK                | 21 | 1486  | 0.35 | 0.30 | 86  |
| 22 K07H8.6a;K07H8.6c;K07H8.6b | GLEQIVVRGK             | 42 | 2513  | 0.35 | 0.12 | 33  |
| 22 K07H8.6a;K07H8.6c;K07H8.6b | VVIRAIYNTPSEEK         | 50 | 9372  | 0.35 | 0.09 | 25  |
| 10 K07H8.6a;K07H8.6c;K07H8.6b | LLSNVQEK               | 43 | 2628  | 0.36 | 0.14 | 40  |
| 22 K07H8.6a;K07H8.6c;K07H8.6b | VVIRAIYNTPSEEK         | 52 | 6508  | 0.36 | 0.15 | 43  |
| 10 K07H8.6a;K07H8.6c;K07H8.6b | MFSLMAK                | 33 | 5276  | 0.36 | 0.06 | 17  |
| 22 K07H8.6a;K07H8.6c;K07H8.6b | FLHQAVLNTPVDTEIRMNWEDK | 10 | 1741  | 0.36 | 0.13 | 35  |
| 22 K07H8.6a;K07H8.6c;K07H8.6b | VVYGENEIEMYK           | 29 | 805   | 0.37 | 0.26 | 71  |
| 10 K07H8.6a;K07H8.6c;K07H8.6b | LLSNVQEK               | 51 | 5402  | 0.38 | 0.10 | 27  |
| 22 K07H8.6a;K07H8.6c;K07H8.6b | GLEQIVVRGK             | 33 | 1803  | 0.39 | 0.11 | 29  |
| 22 K07H8.6a;K07H8.6c;K07H8.6b | QYNIIWLNK              | 38 | 1455  | 0.39 | 0.12 | 31  |
| 22 K07H8.6a;K07H8.6c;K07H8.6b | TLANAGLDLSVYPLEK       | 52 | 1303  | 0.39 | 0.07 | 18  |
| 10 K07H8.6a;K07H8.6c;K07H8.6b | LVQQFESASTRYEK         | 24 | 1277  | 0.40 | 0.13 | 32  |
| 10 K07H8.6a;K07H8.6c;K07H8.6b | MFSLMAK                | 28 | 3145  | 0.40 | 0.15 | 38  |
| 22 K07H8.6a;K07H8.6c;K07H8.6b | VVIRAIYNTPSEEK         | 65 | 3898  | 0.40 | 0.08 | 21  |
| 1 K07H8.6a;K07H8.6c;K07H8.6b  | GLEQIVVRGK             | 23 | 2536  | 0.40 | 0.16 | 39  |
| 10 K07H8.6a;K07H8.6c;K07H8.6b | GLEQIVVRGK             | 17 | 3031  | 0.40 | 0.34 | 84  |
| 1 K07H8.6a;K07H8.6c;K07H8.6b  | LLSNVQEK               | 56 | 6781  | 0.41 | 0.14 | 33  |
| 10 K07H8.6a;K07H8.6c;K07H8.6b | MFSLMAK                | 25 | 2583  | 0.42 | 0.09 | 21  |
| 22 K07H8.6a;K07H8.6c;K07H8.6b | VYQHVAK                | 19 | 12017 | 0.42 | 0.26 | 61  |
| 10 K07H8.6a;K07H8.6c;K07H8.6b | TRFATSQQESNSMK         | 45 | 1618  | 0.43 | 0.32 | 75  |
| 22 K07H8.6a;K07H8.6c;K07H8.6b | VVIRAIYNTPSEEK         | 50 | 4065  | 0.43 | 0.13 | 30  |
| 22 K07H8.6a;K07H8.6c;K07H8.6b | MFSLMAK                | 29 | 1888  | 0.43 | 0.04 | 10  |
| 10 K07H8.6a;K07H8.6c;K07H8.6b | GLEQIVVRGK             | 37 | 2546  | 0.43 | 0.12 | 29  |
| 7 K07H8.6a;K07H8.6c;K07H8.6b  | TRFATSQQESNSMK         | 33 | 2706  | 0.43 | 0.03 | 8   |
| 22 K07H8.6a;K07H8.6c;K07H8.6b | MFSLMAK                | 17 | 623   | 0.44 | 0.30 | 69  |
| 7 K07H8.6a;K07H8.6c;K07H8.6b  | GLEQIVVRGK             | 11 | 721   | 0.44 | 0.20 | 45  |
| 22 K07H8.6a;K07H8.6c;K07H8.6b | ATIQYVYPQTPRTVEELK     | 28 | 5434  | 0.44 | 0.11 | 25  |
| 10 K07H8.6a;K07H8.6c;K07H8.6b | MFSLMAK                | 26 | 1883  | 0.44 | 0.23 | 53  |
| 22 K07H8.6a;K07H8.6c;K07H8.6b | EENFQRIEK              | 10 | 3733  | 0.44 | 0.19 | 43  |
| 22 K07H8.6a;K07H8.6c;K07H8.6b | VVYGENEIEMYK           | 20 | 760   | 0.46 | 0.22 | 49  |
| 7 K07H8.6a;K07H8.6c;K07H8.6b  | TRFATSQQESNSMK         | 23 | 764   | 0.46 | 0.15 | 32  |
| 10 K07H8.6a;K07H8.6c;K07H8.6b | TLANAGLDLSVYPLEK       | 38 | 2123  | 0.46 | 0.14 | 31  |
| 22 K07H8.6a;K07H8.6c;K07H8.6b | LLSNVQEK               | 21 | 480   | 0.46 | 0.12 | 26  |
| 10 K07H8.6a;K07H8.6c;K07H8.6b | LLSNVQEK               | 44 | 7430  | 0.46 | 0.11 | 24  |
| 22 K07H8.6a;K07H8.6c;K07H8.6b | LLSNVQEK               | 59 | 10556 | 0.46 | 0.15 | 32  |
| 10 K07H8.6a;K07H8.6c;K07H8.6b | ATIQYVYPQTPRTVEELK     | 14 | 7210  | 0.46 | 0.13 | 29  |
| 22 K07H8.6a;K07H8.6c;K07H8.6b | TQIRGEELK              | 18 | 8466  | 0.46 | 0.06 | 14  |
| 22 K07H8.6a;K07H8.6c;K07H8.6b | MFSLMAK                | 29 | 1258  | 0.46 | 0.12 | 26  |
| 10 K07H8.6a;K07H8.6c;K07H8.6b | VVYGENEIEMYK           | 10 | 1089  | 0.46 | 0.08 | 18  |
| 10 K07H8.6a;K07H8.6c;K07H8.6b | MFSLMAK                | 26 | 1684  | 0.47 | 0.23 | 50  |
| 10 K07H8.6a;K07H8.6c;K07H8.6b | TQIRGEELK              | 14 | 8483  | 0.47 | 0.22 | 48  |
| 22 K07H8.6a;K07H8.6c;K07H8.6b | EENFQRIEK              | 30 | 2357  | 0.47 | 0.18 | 39  |
| 22 K07H8.6a;K07H8.6c;K07H8.6b | VYQHVAK                | 20 | 10576 | 0.47 | 0.27 | 56  |
| 10 K07H8.6a;K07H8.6c;K07H8.6b | ATIQYVYPQTPRTVEELK     | 17 | 2325  | 0.47 | 0.08 | 17  |
| 10 K07H8.6a;K07H8.6c;K07H8.6b | MFSLMAK                | 20 | 878   | 0.47 | 0.18 | 39  |
| 1 K07H8.6a;K07H8.6c;K07H8.6b  | GLEQIVVRGK             | 58 | 3420  | 0.48 | 0.09 | 20  |
| 10 K07H8.6a;K07H8.6c;K07H8.6b | TRFATSQQESNSMK         | 40 | 5812  | 0.48 | 0.15 | 32  |
| 22 K07H8.6a;K07H8.6c;K07H8.6b | VYQHVAK                | 12 | 5304  | 0.49 | 0.40 | 82  |
| 7 K07H8.6a;K07H8.6c;K07H8.6b  | TRFATSQQESNSMK         | 14 | 1877  | 0.49 | 0.28 | 58  |
| 1 K07H8.6a;K07H8.6c;K07H8.6b  | LVQQFESASTRYEK         | 26 | 726   | 0.49 | 0.16 | 33  |
| 1 K07H8.6a;K07H8.6c;K07H8.6b  | LLSNVQEK               | 50 | 7765  | 0.49 | 0.08 | 16  |

|    |                            |                         |    |       |      |      |    |
|----|----------------------------|-------------------------|----|-------|------|------|----|
| 1  | K07H8.6a;K07H8.6c;K07H8.6b | LLSNVQEK                | 53 | 1595  | 0.49 | 0.07 | 14 |
| 1  | K07H8.6a;K07H8.6c;K07H8.6b | MFSLMAK                 | 20 | 1667  | 0.49 | 0.16 | 33 |
| 1  | K07H8.6a;K07H8.6c;K07H8.6b | QIEQGAELEAAHTVARIVK     | 21 | 3207  | 0.49 | 0.37 | 75 |
| 10 | K07H8.6a;K07H8.6c;K07H8.6b | QIEQGAELEAAHTVARIVK     | 19 | 21857 | 0.50 | 0.12 | 24 |
| 1  | K07H8.6a;K07H8.6c;K07H8.6b | LVQQFESASTRYEK          | 18 | 1835  | 0.50 | 0.14 | 28 |
| 1  | K07H8.6a;K07H8.6c;K07H8.6b | LVQQFESASTRYEK          | 13 | 1122  | 0.50 | 0.22 | 43 |
| 22 | K07H8.6a;K07H8.6c;K07H8.6b | VVIRAIYNTPSEEK          | 53 | 4606  | 0.50 | 0.14 | 28 |
| 10 | K07H8.6a;K07H8.6c;K07H8.6b | GLEQIVVRGK              | 31 | 5525  | 0.51 | 0.13 | 25 |
| 1  | K07H8.6a;K07H8.6c;K07H8.6b | GLEQIVVRGK              | 11 | 1836  | 0.51 | 0.05 | 10 |
| 22 | K07H8.6a;K07H8.6c;K07H8.6b | VYQHVAK                 | 21 | 8728  | 0.51 | 0.21 | 40 |
| 10 | K07H8.6a;K07H8.6c;K07H8.6b | MFSLMAK                 | 11 | 486   | 0.52 | 0.17 | 33 |
| 1  | K07H8.6a;K07H8.6c;K07H8.6b | VVIRAIYNTPSEEK          | 12 | 509   | 0.52 | 0.12 | 24 |
| 22 | K07H8.6a;K07H8.6c;K07H8.6b | VVIRAIYNTPSEEK          | 24 | 6301  | 0.52 | 0.18 | 34 |
| 10 | K07H8.6a;K07H8.6c;K07H8.6b | LLSNVQEK                | 34 | 5478  | 0.52 | 0.29 | 56 |
| 10 | K07H8.6a;K07H8.6c;K07H8.6b | MFSLMAK                 | 41 | 2700  | 0.53 | 0.29 | 55 |
| 10 | K07H8.6a;K07H8.6c;K07H8.6b | VVIRAIYNTPSEEK          | 20 | 3025  | 0.53 | 0.30 | 57 |
| 22 | K07H8.6a;K07H8.6c;K07H8.6b | VVIRAIYNTPSEEK          | 51 | 3378  | 0.54 | 0.11 | 21 |
| 22 | K07H8.6a;K07H8.6c;K07H8.6b | ATIQYVYPQTPRTVEELK      | 15 | 9476  | 0.54 | 0.14 | 25 |
| 1  | K07H8.6a;K07H8.6c;K07H8.6b | YLRQLPQWTENK            | 24 | 794   | 0.54 | 0.24 | 45 |
| 7  | K07H8.6a;K07H8.6c;K07H8.6b | ATIQYVYPQTPRTVEELK      | 26 | 3760  | 0.55 | 0.12 | 22 |
| 22 | K07H8.6a;K07H8.6c;K07H8.6b | ATIQYVYPQTPRTVEELK      | 28 | 2902  | 0.55 | 0.12 | 22 |
| 22 | K07H8.6a;K07H8.6c;K07H8.6b | QIEQGAELEAAHTVARIVK     | 18 | 6316  | 0.55 | 0.23 | 41 |
| 22 | K07H8.6a;K07H8.6c;K07H8.6b | VVIRAIYNTPSEEK          | 12 | 1640  | 0.55 | 0.19 | 34 |
| 10 | K07H8.6a;K07H8.6c;K07H8.6b | MFSLMAK                 | 42 | 1766  | 0.56 | 0.20 | 36 |
| 22 | K07H8.6a;K07H8.6c;K07H8.6b | YLRQLPQWTENK            | 21 | 1675  | 0.56 | 0.13 | 23 |
| 10 | K07H8.6a;K07H8.6c;K07H8.6b | GLEQIVVRGK              | 16 | 1283  | 0.56 | 0.15 | 27 |
| 10 | K07H8.6a;K07H8.6c;K07H8.6b | ATIQYVYPQTPRTVEELK      | 27 | 4344  | 0.56 | 0.05 | 8  |
| 22 | K07H8.6a;K07H8.6c;K07H8.6b | RAVINMLQVNILK           | 29 | 2429  | 0.56 | 0.17 | 30 |
| 22 | K07H8.6a;K07H8.6c;K07H8.6b | LLSNVQEK                | 57 | 11654 | 0.57 | 0.13 | 22 |
| 10 | K07H8.6a;K07H8.6c;K07H8.6b | VVYGENEIEMYK            | 14 | 1054  | 0.58 | 0.13 | 22 |
| 22 | K07H8.6a;K07H8.6c;K07H8.6b | VVIRAIYNTPSEEK          | 49 | 4111  | 0.58 | 0.08 | 14 |
| 22 | K07H8.6a;K07H8.6c;K07H8.6b | LVQQFESASTRYEK          | 55 | 3495  | 0.58 | 0.11 | 20 |
| 22 | K07H8.6a;K07H8.6c;K07H8.6b | MFSLMAK                 | 33 | 1701  | 0.58 | 0.12 | 21 |
| 22 | K07H8.6a;K07H8.6c;K07H8.6b | YLRQLPQWTENK            | 16 | 5684  | 0.58 | 0.14 | 24 |
| 22 | K07H8.6a;K07H8.6c;K07H8.6b | MFSLMAK                 | 18 | 1854  | 0.58 | 0.27 | 47 |
| 10 | K07H8.6a;K07H8.6c;K07H8.6b | MFSLMAK                 | 32 | 1790  | 0.58 | 0.16 | 28 |
| 22 | K07H8.6a;K07H8.6c;K07H8.6b | TLANAGLDLSVYPLEK        | 12 | 625   | 0.58 | 0.17 | 30 |
| 10 | K07H8.6a;K07H8.6c;K07H8.6b | QIEQGAELEAAHTVARIVK     | 26 | 23141 | 0.59 | 0.17 | 28 |
| 22 | K07H8.6a;K07H8.6c;K07H8.6b | VVIRAIYNTPSEEK          | 51 | 3232  | 0.59 | 0.13 | 23 |
| 22 | K07H8.6a;K07H8.6c;K07H8.6b | ATIQYVYPQTPRTVEELK      | 25 | 2090  | 0.59 | 0.13 | 23 |
| 1  | K07H8.6a;K07H8.6c;K07H8.6b | LLSNVQEK                | 43 | 1680  | 0.59 | 0.12 | 20 |
| 22 | K07H8.6a;K07H8.6c;K07H8.6b | ATIQYVYPQTPRTVEELK      | 31 | 5287  | 0.59 | 0.12 | 20 |
| 22 | K07H8.6a;K07H8.6c;K07H8.6b | LLSNVQEK                | 15 | 598   | 0.59 | 0.06 | 10 |
| 7  | K07H8.6a;K07H8.6c;K07H8.6b | MFSLMAK                 | 12 | 1063  | 0.59 | 0.18 | 30 |
| 10 | K07H8.6a;K07H8.6c;K07H8.6b | QIEQGAELEAAHTVARIVK     | 10 | 9499  | 0.60 | 0.45 | 75 |
| 1  | K07H8.6a;K07H8.6c;K07H8.6b | SEPRFVVLMK              | 12 | 1921  | 0.60 | 0.16 | 26 |
| 10 | K07H8.6a;K07H8.6c;K07H8.6b | ATIQYVYPQTPRTVEELK      | 10 | 5266  | 0.60 | 0.12 | 20 |
| 22 | K07H8.6a;K07H8.6c;K07H8.6b | VVIRAIYNTPSEEK          | 47 | 2428  | 0.60 | 0.19 | 32 |
| 1  | K07H8.6a;K07H8.6c;K07H8.6b | YLRQLPQWTENK            | 20 | 1549  | 0.61 | 0.10 | 16 |
| 10 | K07H8.6a;K07H8.6c;K07H8.6b | MFSLMAK                 | 12 | 872   | 0.61 | 0.28 | 46 |
| 10 | K07H8.6a;K07H8.6c;K07H8.6b | VVIRAIYNTPSEEK          | 37 | 3754  | 0.61 | 0.17 | 28 |
| 10 | K07H8.6a;K07H8.6c;K07H8.6b | VVIRAIYNTPSEEK          | 55 | 3748  | 0.62 | 0.09 | 14 |
| 7  | K07H8.6a;K07H8.6c;K07H8.6b | VVIRAIYNTPSEEK          | 29 | 1139  | 0.62 | 0.11 | 18 |
| 10 | K07H8.6a;K07H8.6c;K07H8.6b | HNGRRYLEAPEYDEEEHREQITK | 13 | 17982 | 0.62 | 0.15 | 24 |
| 22 | K07H8.6a;K07H8.6c;K07H8.6b | LVQQFESASTRYEK          | 50 | 3999  | 0.62 | 0.10 | 17 |
| 1  | K07H8.6a;K07H8.6c;K07H8.6b | ATIQYVYPQTPRTVEELK      | 32 | 6552  | 0.62 | 0.09 | 15 |
| 22 | K07H8.6a;K07H8.6c;K07H8.6b | QIEQGAELEAAHTVARIVK     | 16 | 17998 | 0.62 | 0.17 | 27 |
| 22 | K07H8.6a;K07H8.6c;K07H8.6b | FEIKPEVVK               | 29 | 10186 | 0.63 | 0.29 | 46 |
| 10 | K07H8.6a;K07H8.6c;K07H8.6b | TRFATSQQESNSMK          | 31 | 3690  | 0.63 | 0.21 | 33 |
| 10 | K07H8.6a;K07H8.6c;K07H8.6b | TQIRGEELK               | 15 | 10182 | 0.63 | 0.10 | 16 |
| 7  | K07H8.6a;K07H8.6c;K07H8.6b | MFSLMAK                 | 24 | 2105  | 0.63 | 0.56 | 88 |
| 22 | K07H8.6a;K07H8.6c;K07H8.6b | YLRQLPQWTENK            | 11 | 10014 | 0.63 | 0.17 | 28 |
| 7  | K07H8.6a;K07H8.6c;K07H8.6b | VVIRAIYNTPSEEK          | 30 | 1033  | 0.63 | 0.19 | 30 |
| 1  | K07H8.6a;K07H8.6c;K07H8.6b | YLRQLPQWTENK            | 14 | 573   | 0.64 | 0.12 | 19 |
| 10 | K07H8.6a;K07H8.6c;K07H8.6b | GLEQIVVRGK              | 50 | 7152  | 0.64 | 0.08 | 12 |
| 1  | K07H8.6a;K07H8.6c;K07H8.6b | QYNIWLNK                | 17 | 507   | 0.64 | 0.25 | 39 |
| 22 | K07H8.6a;K07H8.6c;K07H8.6b | VVIRAIYNTPSEEK          | 51 | 4057  | 0.64 | 0.15 | 24 |
| 22 | K07H8.6a;K07H8.6c;K07H8.6b | QIEQGAELEAAHTVARIVK     | 28 | 12380 | 0.64 | 0.28 | 43 |
| 22 | K07H8.6a;K07H8.6c;K07H8.6b | ATIQYVYPQTPRTVEELK      | 24 | 7453  | 0.64 | 0.16 | 25 |
| 22 | K07H8.6a;K07H8.6c;K07H8.6b | VVIRAIYNTPSEEK          | 11 | 1437  | 0.64 | 0.13 | 20 |
| 1  | K07H8.6a;K07H8.6c;K07H8.6b | MFSLMAK                 | 19 | 796   | 0.65 | 0.21 | 32 |
| 10 | K07H8.6a;K07H8.6c;K07H8.6b | TLANAGLDLSVYPLEK        | 34 | 2772  | 0.65 | 0.19 | 30 |
| 10 | K07H8.6a;K07H8.6c;K07H8.6b | VYQHVAK                 | 20 | 4338  | 0.65 | 0.14 | 22 |
| 1  | K07H8.6a;K07H8.6c;K07H8.6b | GLEQIVVRGK              | 13 | 2018  | 0.65 | 0.13 | 20 |
| 22 | K07H8.6a;K07H8.6c;K07H8.6b | YLRQLPQWTENK            | 27 | 4052  | 0.65 | 0.13 | 21 |
| 1  | K07H8.6a;K07H8.6c;K07H8.6b | MFSLMAK                 | 23 | 1770  | 0.65 | 0.18 | 28 |
| 22 | K07H8.6a;K07H8.6c;K07H8.6b | MFSLMAK                 | 17 | 1128  | 0.65 | 0.09 | 14 |
| 22 | K07H8.6a;K07H8.6c;K07H8.6b | ATIQYVYPQTPRTVEELK      | 26 | 6331  | 0.66 | 0.15 | 23 |
| 22 | K07H8.6a;K07H8.6c;K07H8.6b | ATIQYVYPQTPRTVEELK      | 22 | 7832  | 0.66 | 0.28 | 43 |
| 10 | K07H8.6a;K07H8.6c;K07H8.6b | VVIRAIYNTPSEEK          | 12 | 2422  | 0.66 | 0.09 | 14 |
| 22 | K07H8.6a;K07H8.6c;K07H8.6b | VVYGENEIEMYK            | 34 | 1791  | 0.66 | 0.14 | 21 |
| 1  | K07H8.6a;K07H8.6c;K07H8.6b | LVQQFESASTRYEK          | 18 | 1541  | 0.67 | 0.14 | 21 |
| 10 | K07H8.6a;K07H8.6c;K07H8.6b | VVIRAIYNTPSEEK          | 12 | 2307  | 0.67 | 0.24 | 36 |
| 22 | K07H8.6a;K07H8.6c;K07H8.6b | QIEQGAELEAAHTVARIVK     | 15 | 17758 | 0.67 | 0.15 | 22 |
| 22 | K07H8.6a;K07H8.6c;K07H8.6b | RAVINMLQVNILK           | 21 | 3495  | 0.67 | 0.23 | 35 |
| 22 | K07H8.6a;K07H8.6c;K07H8.6b | QIEQGAELEAAHTVARIVK     | 14 | 18153 | 0.67 | 0.17 | 26 |
| 1  | K07H8.6a;K07H8.6c;K07H8.6b | QYNIWLNK                | 11 | 579   | 0.68 | 0.16 | 23 |
| 1  | K07H8.6a;K07H8.6c;K07H8.6b | LVQQFESASTRYEK          | 14 | 569   | 0.68 | 0.20 | 29 |
| 22 | K07H8.6a;K07H8.6c;K07H8.6b | SEPRFVVLMK              | 12 | 6376  | 0.68 | 0.54 | 79 |
| 22 | K07H8.6a;K07H8.6c;K07H8.6b | VVIRAIYNTPSEEK          | 52 | 3510  | 0.69 | 0.11 | 17 |
| 22 | K07H8.6a;K07H8.6c;K07H8.6b | LLSNVQEK                | 15 | 1989  | 0.69 | 0.18 | 27 |
| 22 | K07H8.6a;K07H8.6c;K07H8.6b | ATIQYVYPQTPRTVEELK      | 21 | 4655  | 0.69 | 0.16 | 23 |
| 10 | K07H8.6a;K07H8.6c;K07H8.6b | ATIQYVYPQTPRTVEELK      | 15 | 13573 | 0.69 | 0.12 | 17 |
| 10 | K07H8.6a;K07H8.6c;K07H8.6b | VVIRAIYNTPSEEK          | 41 | 4231  | 0.69 | 0.08 | 11 |
| 1  | K07H8.6a;K07H8.6c;K07H8.6b | VVIRAIYNTPSEEK          | 55 | 2501  | 0.70 | 0.19 | 28 |
| 10 | K07H8.6a;K07H8.6c;K07H8.6b | RAVINMLQVNILK           | 15 | 1619  | 0.70 | 0.41 | 59 |
| 22 | K07H8.6a;K07H8.6c;K07H8.6b | VVIRAIYNTPSEEK          | 41 | 3822  | 0.70 | 0.07 | 10 |
| 1  | K07H8.6a;K07H8.6c;K07H8.6b | ATIQYVYPQTPRTVEELK      | 26 | 6547  | 0.71 | 0.13 | 18 |
| 1  | K07H8.6a;K07H8.6c;K07H8.6b | LLSNVQEK                | 33 | 1203  | 0.71 | 0.16 | 23 |
| 1  | K07H8.6a;K07H8.6c;K07H8.6b | LVQQFESASTRYEK          | 33 | 1654  | 0.71 | 0.12 | 17 |
| 22 | K07H8.6a;K07H8.6c;K07H8.6b | VVIRAIYNTPSEEK          | 27 | 3089  | 0.71 | 0.26 | 37 |

|                               |                      |    |       |      |      |    |
|-------------------------------|----------------------|----|-------|------|------|----|
| 10 K07H8.6a;K07H8.6c;K07H8.6b | VVIRAIYNTPSEEK       | 39 | 2687  | 0.71 | 0.11 | 16 |
| 22 K07H8.6a;K07H8.6c;K07H8.6b | VVIRAIYNTPSEEK       | 42 | 1981  | 0.73 | 0.07 | 10 |
| 22 K07H8.6a;K07H8.6c;K07H8.6b | MFSLMAK              | 21 | 1129  | 0.73 | 0.18 | 24 |
| 22 K07H8.6a;K07H8.6c;K07H8.6b | GLEQIVVRGK           | 22 | 3701  | 0.73 | 0.17 | 23 |
| 22 K07H8.6a;K07H8.6c;K07H8.6b | VYQHVAK              | 22 | 3022  | 0.73 | 0.23 | 31 |
| 7 K07H8.6a;K07H8.6c;K07H8.6b  | LLSNVQEK             | 29 | 3401  | 0.73 | 0.20 | 27 |
| 22 K07H8.6a;K07H8.6c;K07H8.6b | VVIRAIYNTPSEEK       | 32 | 2052  | 0.74 | 0.05 | 6  |
| 22 K07H8.6a;K07H8.6c;K07H8.6b | YLRQLPQWTENK         | 12 | 6932  | 0.75 | 0.09 | 12 |
| 1 K07H8.6a;K07H8.6c;K07H8.6b  | LLSNVQEK             | 26 | 1597  | 0.75 | 0.19 | 25 |
| 22 K07H8.6a;K07H8.6c;K07H8.6b | TLANAGLDLSVYPLEK     | 77 | 5011  | 0.75 | 0.07 | 9  |
| 1 K07H8.6a;K07H8.6c;K07H8.6b  | MFSLMAK              | 18 | 1275  | 0.75 | 0.22 | 29 |
| 22 K07H8.6a;K07H8.6c;K07H8.6b | TLANAGLDLSVYPLEK     | 73 | 4662  | 0.76 | 0.19 | 26 |
| 22 K07H8.6a;K07H8.6c;K07H8.6b | GLEQIVVRGK           | 33 | 23070 | 0.76 | 0.15 | 19 |
| 10 K07H8.6a;K07H8.6c;K07H8.6b | TLANAGLDLSVYPLEK     | 69 | 4273  | 0.76 | 0.09 | 12 |
| 10 K07H8.6a;K07H8.6c;K07H8.6b | LLSNVQEK             | 13 | 890   | 0.77 | 0.15 | 19 |
| 7 K07H8.6a;K07H8.6c;K07H8.6b  | VVIRAIYNTPSEEK       | 40 | 2005  | 0.77 | 0.11 | 15 |
| 10 K07H8.6a;K07H8.6c;K07H8.6b | ATIQYVYPQTPRTVEELK   | 10 | 2683  | 0.77 | 0.12 | 15 |
| 10 K07H8.6a;K07H8.6c;K07H8.6b | LVQQFESAstryEK       | 36 | 2686  | 0.78 | 0.15 | 20 |
| 22 K07H8.6a;K07H8.6c;K07H8.6b | VVIRAIYNTPSEEK       | 18 | 3389  | 0.78 | 0.25 | 32 |
| 22 K07H8.6a;K07H8.6c;K07H8.6b | TQIRGEELK            | 17 | 6457  | 0.78 | 0.06 | 7  |
| 1 K07H8.6a;K07H8.6c;K07H8.6b  | GLEQIVVRGK           | 25 | 2895  | 0.78 | 0.07 | 8  |
| 22 K07H8.6a;K07H8.6c;K07H8.6b | VVIRAIYNTPSEEK       | 15 | 1853  | 0.79 | 0.09 | 12 |
| 10 K07H8.6a;K07H8.6c;K07H8.6b | QIEQGEAELEAAHTVARIVK | 12 | 27856 | 0.79 | 0.21 | 27 |
| 7 K07H8.6a;K07H8.6c;K07H8.6b  | LVQQFESAstryEK       | 20 | 1511  | 0.79 | 0.10 | 13 |
| 22 K07H8.6a;K07H8.6c;K07H8.6b | TLANAGLDLSVYPLEK     | 66 | 2802  | 0.79 | 0.18 | 23 |
| 22 K07H8.6a;K07H8.6c;K07H8.6b | YLRQLPQWTENK         | 41 | 3139  | 0.79 | 0.10 | 13 |
| 22 K07H8.6a;K07H8.6c;K07H8.6b | VVYGENEIEMYK         | 36 | 1996  | 0.79 | 0.14 | 18 |
| 22 K07H8.6a;K07H8.6c;K07H8.6b | TLANAGLDLSVYPLEK     | 21 | 1651  | 0.79 | 0.15 | 18 |
| 22 K07H8.6a;K07H8.6c;K07H8.6b | VVIRAIYNTPSEEK       | 16 | 2531  | 0.80 | 0.27 | 34 |
| 10 K07H8.6a;K07H8.6c;K07H8.6b | YLRQLPQWTENK         | 26 | 1482  | 0.80 | 0.21 | 26 |
| 22 K07H8.6a;K07H8.6c;K07H8.6b | VVIRAIYNTPSEEK       | 27 | 2768  | 0.80 | 0.07 | 9  |
| 22 K07H8.6a;K07H8.6c;K07H8.6b | TQIRGEELK            | 22 | 5748  | 0.81 | 0.08 | 10 |
| 10 K07H8.6a;K07H8.6c;K07H8.6b | YLRQLPQWTENK         | 11 | 6486  | 0.81 | 0.14 | 17 |
| 22 K07H8.6a;K07H8.6c;K07H8.6b | GLEQIVVRGK           | 13 | 2559  | 0.81 | 0.13 | 15 |
| 22 K07H8.6a;K07H8.6c;K07H8.6b | YLRQLPQWTENK         | 43 | 4051  | 0.82 | 0.15 | 18 |
| 10 K07H8.6a;K07H8.6c;K07H8.6b | VVYGENEIEMYK         | 15 | 1139  | 0.82 | 0.14 | 16 |
| 10 K07H8.6a;K07H8.6c;K07H8.6b | LLSNVQEK             | 24 | 936   | 0.82 | 0.19 | 23 |
| 10 K07H8.6a;K07H8.6c;K07H8.6b | LLSNVQEK             | 42 | 4040  | 0.83 | 0.13 | 16 |
| 22 K07H8.6a;K07H8.6c;K07H8.6b | TLANAGLDLSVYPLEK     | 35 | 2367  | 0.83 | 0.14 | 17 |
| 22 K07H8.6a;K07H8.6c;K07H8.6b | VVIRAIYNTPSEEK       | 45 | 3352  | 0.83 | 0.11 | 14 |
| 22 K07H8.6a;K07H8.6c;K07H8.6b | YLRQLPQWTENK         | 23 | 4487  | 0.83 | 0.16 | 19 |
| 10 K07H8.6a;K07H8.6c;K07H8.6b | LLSNVQEK             | 33 | 3635  | 0.83 | 0.10 | 12 |
| 10 K07H8.6a;K07H8.6c;K07H8.6b | LLSNVQEK             | 35 | 3085  | 0.83 | 0.18 | 21 |
| 22 K07H8.6a;K07H8.6c;K07H8.6b | LVQQFESAstryEK       | 19 | 580   | 0.84 | 0.16 | 19 |
| 10 K07H8.6a;K07H8.6c;K07H8.6b | VVIRAIYNTPSEEK       | 51 | 3664  | 0.84 | 0.11 | 14 |
| 10 K07H8.6a;K07H8.6c;K07H8.6b | ATIQYVYPQTPRTVEELK   | 21 | 3485  | 0.84 | 0.06 | 7  |
| 1 K07H8.6a;K07H8.6c;K07H8.6b  | GLEQIVVRGK           | 23 | 2497  | 0.84 | 0.12 | 14 |
| 10 K07H8.6a;K07H8.6c;K07H8.6b | VVYGENEIEMYK         | 18 | 1098  | 0.84 | 0.21 | 25 |
| 1 K07H8.6a;K07H8.6c;K07H8.6b  | TRFATSQQESNSMK       | 23 | 312   | 0.85 | 0.17 | 20 |
| 10 K07H8.6a;K07H8.6c;K07H8.6b | ATIQYVYPQTPRTVEELK   | 28 | 7058  | 0.85 | 0.14 | 16 |
| 10 K07H8.6a;K07H8.6c;K07H8.6b | NIAPLK               | 15 | 1216  | 0.85 | 0.19 | 22 |
| 1 K07H8.6a;K07H8.6c;K07H8.6b  | GLEQIVVRGK           | 11 | 612   | 0.85 | 0.17 | 20 |
| 22 K07H8.6a;K07H8.6c;K07H8.6b | VVIRAIYNTPSEEK       | 21 | 1233  | 0.85 | 0.16 | 18 |
| 22 K07H8.6a;K07H8.6c;K07H8.6b | VVIRAIYNTPSEEK       | 25 | 6639  | 0.85 | 0.12 | 14 |
| 1 K07H8.6a;K07H8.6c;K07H8.6b  | LVQQFESAstryEK       | 15 | 482   | 0.86 | 0.19 | 22 |
| 1 K07H8.6a;K07H8.6c;K07H8.6b  | VYQHVAK              | 27 | 2747  | 0.86 | 0.11 | 13 |
| 10 K07H8.6a;K07H8.6c;K07H8.6b | ATIQYVYPQTPRTVEELK   | 27 | 6061  | 0.86 | 0.12 | 14 |
| 10 K07H8.6a;K07H8.6c;K07H8.6b | VVIRAIYNTPSEEK       | 50 | 3912  | 0.86 | 0.17 | 20 |
| 22 K07H8.6a;K07H8.6c;K07H8.6b | LVQQFESAstryEK       | 15 | 1839  | 0.86 | 0.17 | 19 |
| 1 K07H8.6a;K07H8.6c;K07H8.6b  | ETEFYDAENQENTIPK     | 32 | 474   | 0.86 | 0.23 | 27 |
| 22 K07H8.6a;K07H8.6c;K07H8.6b | VVIRAIYNTPSEEK       | 48 | 1616  | 0.86 | 0.09 | 11 |
| 10 K07H8.6a;K07H8.6c;K07H8.6b | QIEQGEAELEAAHTVARIVK | 21 | 27504 | 0.87 | 0.21 | 24 |
| 10 K07H8.6a;K07H8.6c;K07H8.6b | TQIRGEELK            | 14 | 12067 | 0.87 | 0.07 | 8  |
| 10 K07H8.6a;K07H8.6c;K07H8.6b | TLANAGLDLSVYPLEK     | 72 | 4054  | 0.88 | 0.12 | 13 |
| 22 K07H8.6a;K07H8.6c;K07H8.6b | QIEQGEAELEAAHTVARIVK | 14 | 10224 | 0.88 | 0.14 | 15 |
| 1 K07H8.6a;K07H8.6c;K07H8.6b  | VVIRAIYNTPSEEK       | 32 | 945   | 0.88 | 0.11 | 13 |
| 1 K07H8.6a;K07H8.6c;K07H8.6b  | VVIRAIYNTPSEEK       | 18 | 436   | 0.88 | 0.19 | 22 |
| 7 K07H8.6a;K07H8.6c;K07H8.6b  | VVIRAIYNTPSEEK       | 54 | 2560  | 0.88 | 0.10 | 11 |
| 1 K07H8.6a;K07H8.6c;K07H8.6b  | ATIQYVYPQTPRTVEELK   | 26 | 4685  | 0.88 | 0.11 | 12 |
| 10 K07H8.6a;K07H8.6c;K07H8.6b | VVYGENEIEMYK         | 59 | 1700  | 0.88 | 0.12 | 14 |
| 22 K07H8.6a;K07H8.6c;K07H8.6b | GLEQIVVRGK           | 57 | 23059 | 0.89 | 0.11 | 12 |
| 1 K07H8.6a;K07H8.6c;K07H8.6b  | MFSLMAK              | 24 | 2031  | 0.89 | 0.07 | 8  |
| 10 K07H8.6a;K07H8.6c;K07H8.6b | VVIRAIYNTPSEEK       | 13 | 2691  | 0.89 | 0.24 | 27 |
| 10 K07H8.6a;K07H8.6c;K07H8.6b | GLEQIVVRGK           | 17 | 4796  | 0.90 | 0.09 | 10 |
| 10 K07H8.6a;K07H8.6c;K07H8.6b | VVIRAIYNTPSEEK       | 51 | 3666  | 0.90 | 0.12 | 13 |
| 22 K07H8.6a;K07H8.6c;K07H8.6b | VVIRAIYNTPSEEK       | 18 | 3891  | 0.90 | 0.18 | 20 |
| 10 K07H8.6a;K07H8.6c;K07H8.6b | ATIQYVYPQTPRTVEELK   | 35 | 7572  | 0.90 | 0.06 | 7  |
| 1 K07H8.6a;K07H8.6c;K07H8.6b  | MFSLMAK              | 16 | 2721  | 0.90 | 0.12 | 13 |
| 22 K07H8.6a;K07H8.6c;K07H8.6b | GLEQIVVRGK           | 28 | 909   | 0.90 | 0.21 | 24 |
| 10 K07H8.6a;K07H8.6c;K07H8.6b | VVYGENEIEMYK         | 29 | 1990  | 0.90 | 0.09 | 10 |
| 1 K07H8.6a;K07H8.6c;K07H8.6b  | VVIRAIYNTPSEEK       | 35 | 2630  | 0.91 | 0.13 | 14 |
| 7 K07H8.6a;K07H8.6c;K07H8.6b  | TLANAGLDLSVYPLEK     | 49 | 2064  | 0.91 | 0.12 | 13 |
| 1 K07H8.6a;K07H8.6c;K07H8.6b  | QYNIWLNK             | 21 | 515   | 0.91 | 0.19 | 21 |
| 10 K07H8.6a;K07H8.6c;K07H8.6b | SEPRFVVLmk           | 14 | 6933  | 0.92 | 0.05 | 5  |
| 10 K07H8.6a;K07H8.6c;K07H8.6b | VVIRAIYNTPSEEK       | 68 | 3383  | 0.93 | 0.13 | 14 |
| 1 K07H8.6a;K07H8.6c;K07H8.6b  | MFSLMAK              | 19 | 1569  | 0.93 | 0.13 | 15 |
| 22 K07H8.6a;K07H8.6c;K07H8.6b | EENFQRIEK            | 18 | 3470  | 0.93 | 0.33 | 35 |
| 10 K07H8.6a;K07H8.6c;K07H8.6b | VVYGENEIEMYK         | 14 | 1206  | 0.93 | 0.32 | 35 |
| 10 K07H8.6a;K07H8.6c;K07H8.6b | NIAPLK               | 14 | 1891  | 0.93 | 0.18 | 19 |
| 10 K07H8.6a;K07H8.6c;K07H8.6b | RAVINMLQVNIk         | 16 | 2754  | 0.93 | 0.19 | 20 |
| 22 K07H8.6a;K07H8.6c;K07H8.6b | MFSLMAK              | 29 | 1551  | 0.94 | 0.12 | 13 |
| 10 K07H8.6a;K07H8.6c;K07H8.6b | RAVINMLQVNIk         | 25 | 2881  | 0.94 | 0.18 | 19 |
| 1 K07H8.6a;K07H8.6c;K07H8.6b  | LVQQFESAstryEK       | 14 | 733   | 0.95 | 0.21 | 22 |
| 22 K07H8.6a;K07H8.6c;K07H8.6b | YLRQLPQWTENK         | 45 | 2999  | 0.95 | 0.13 | 14 |
| 22 K07H8.6a;K07H8.6c;K07H8.6b | SEPRFVVLmk           | 16 | 4670  | 0.96 | 0.10 | 11 |
| 22 K07H8.6a;K07H8.6c;K07H8.6b | TQIRGEELK            | 17 | 3954  | 0.96 | 0.07 | 7  |
| 22 K07H8.6a;K07H8.6c;K07H8.6b | VVIRAIYNTPSEEK       | 30 | 2300  | 0.97 | 0.11 | 12 |
| 1 K07H8.6a;K07H8.6c;K07H8.6b  | ATIQYVYPQTPRTVEELK   | 18 | 3619  | 0.97 | 0.10 | 11 |
| 10 K07H8.6a;K07H8.6c;K07H8.6b | ATIQYVYPQTPRTVEELK   | 15 | 4510  | 0.97 | 0.19 | 20 |
| 22 K07H8.6a;K07H8.6c;K07H8.6b | MFSLMAK              | 29 | 1127  | 0.98 | 0.33 | 33 |
| 22 K07H8.6a;K07H8.6c;K07H8.6b | MFSLMAK              | 32 | 1564  | 0.98 | 0.21 | 22 |

|    |                            |                         |    |       |      |      |    |
|----|----------------------------|-------------------------|----|-------|------|------|----|
| 22 | K07H8.6a;K07H8.6c;K07H8.6b | GLEQIVVRGK              | 16 | 3982  | 0.98 | 0.13 | 14 |
| 1  | K07H8.6a;K07H8.6c;K07H8.6b | GLEQIVVRGK              | 10 | 465   | 0.98 | 0.19 | 19 |
| 22 | K07H8.6a;K07H8.6c;K07H8.6b | MFSLMAK                 | 15 | 1174  | 0.98 | 0.22 | 23 |
| 10 | K07H8.6a;K07H8.6c;K07H8.6b | VVYGENEIEMYK            | 47 | 1416  | 0.98 | 0.24 | 25 |
| 10 | K07H8.6a;K07H8.6c;K07H8.6b | ATIQYVYPQTPRTVEELK      | 20 | 3914  | 0.99 | 0.19 | 19 |
| 22 | K07H8.6a;K07H8.6c;K07H8.6b | TLANAGLDLSVYPLEK        | 33 | 1673  | 0.99 | 0.14 | 14 |
| 10 | K07H8.6a;K07H8.6c;K07H8.6b | GLEQIVVRGK              | 39 | 6523  | 0.99 | 0.13 | 13 |
| 10 | K07H8.6a;K07H8.6c;K07H8.6b | ETEFYDAENQENTIPK        | 45 | 712   | 0.99 | 0.16 | 17 |
| 1  | K07H8.6a;K07H8.6c;K07H8.6b | QYNIIWLNK               | 21 | 937   | 0.99 | 0.09 | 9  |
| 1  | K07H8.6a;K07H8.6c;K07H8.6b | MFSLMAK                 | 21 | 2140  | 1.01 | 0.11 | 11 |
| 22 | K07H8.6a;K07H8.6c;K07H8.6b | VVIRAIYNTPSEEK          | 17 | 2092  | 1.02 | 0.14 | 13 |
| 22 | K07H8.6a;K07H8.6c;K07H8.6b | LLSNVQEK                | 12 | 1810  | 1.02 | 0.14 | 13 |
| 10 | K07H8.6a;K07H8.6c;K07H8.6b | YLRQLPQWTENK            | 47 | 2132  | 1.03 | 0.11 | 11 |
| 1  | K07H8.6a;K07H8.6c;K07H8.6b | EENFQRIEK               | 12 | 1621  | 1.03 | 0.15 | 15 |
| 10 | K07H8.6a;K07H8.6c;K07H8.6b | TRFATSQQESNSMK          | 82 | 2079  | 1.03 | 0.13 | 12 |
| 22 | K07H8.6a;K07H8.6c;K07H8.6b | QYNIIWLNK               | 11 | 378   | 1.03 | 0.13 | 13 |
| 22 | K07H8.6a;K07H8.6c;K07H8.6b | VVIRAIYNTPSEEK          | 56 | 6742  | 1.04 | 0.13 | 13 |
| 7  | K07H8.6a;K07H8.6c;K07H8.6b | VVIRAIYNTPSEEK          | 34 | 6378  | 1.04 | 0.12 | 12 |
| 10 | K07H8.6a;K07H8.6c;K07H8.6b | LLSNVQEK                | 26 | 3007  | 1.04 | 0.11 | 10 |
| 22 | K07H8.6a;K07H8.6c;K07H8.6b | LLSNVQEK                | 30 | 3211  | 1.04 | 0.17 | 17 |
| 22 | K07H8.6a;K07H8.6c;K07H8.6b | LVQQFESASTRYEK          | 52 | 3181  | 1.04 | 0.12 | 11 |
| 1  | K07H8.6a;K07H8.6c;K07H8.6b | MFSLMAK                 | 21 | 2407  | 1.04 | 0.06 | 6  |
| 10 | K07H8.6a;K07H8.6c;K07H8.6b | VVIRAIYNTPSEEK          | 38 | 2318  | 1.05 | 0.12 | 12 |
| 22 | K07H8.6a;K07H8.6c;K07H8.6b | RAVINMLQVNILK           | 26 | 3023  | 1.06 | 0.08 | 8  |
| 1  | K07H8.6a;K07H8.6c;K07H8.6b | GLEQIVVRGK              | 36 | 2133  | 1.06 | 0.11 | 11 |
| 1  | K07H8.6a;K07H8.6c;K07H8.6b | YLRQLPQWTENK            | 26 | 910   | 1.06 | 0.14 | 13 |
| 22 | K07H8.6a;K07H8.6c;K07H8.6b | TRFATSQQESNSMK          | 48 | 3254  | 1.07 | 0.12 | 11 |
| 22 | K07H8.6a;K07H8.6c;K07H8.6b | TQIRGEELK               | 15 | 11086 | 1.07 | 0.07 | 7  |
| 10 | K07H8.6a;K07H8.6c;K07H8.6b | VVIRAIYNTPSEEK          | 41 | 2756  | 1.08 | 0.07 | 7  |
| 10 | K07H8.6a;K07H8.6c;K07H8.6b | SEPRFVVLMK              | 15 | 2529  | 1.09 | 0.08 | 7  |
| 22 | K07H8.6a;K07H8.6c;K07H8.6b | CNYEREMFEK              | 42 | 2494  | 1.09 | 0.05 | 4  |
| 22 | K07H8.6a;K07H8.6c;K07H8.6b | YLRQLPQWTENK            | 37 | 3871  | 1.10 | 0.14 | 13 |
| 22 | K07H8.6a;K07H8.6c;K07H8.6b | EENFQRIEK               | 22 | 3997  | 1.10 | 0.23 | 21 |
| 1  | K07H8.6a;K07H8.6c;K07H8.6b | QYNIIWLNK               | 36 | 1103  | 1.10 | 0.17 | 16 |
| 10 | K07H8.6a;K07H8.6c;K07H8.6b | EENFQRIEK               | 13 | 3049  | 1.11 | 0.49 | 44 |
| 1  | K07H8.6a;K07H8.6c;K07H8.6b | MFSLMAK                 | 26 | 2183  | 1.11 | 0.21 | 19 |
| 22 | K07H8.6a;K07H8.6c;K07H8.6b | VVIRAIYNTPSEEK          | 54 | 4117  | 1.11 | 0.13 | 12 |
| 1  | K07H8.6a;K07H8.6c;K07H8.6b | VYQHVAK                 | 40 | 3584  | 1.11 | 0.13 | 12 |
| 7  | K07H8.6a;K07H8.6c;K07H8.6b | QYNIIWLNK               | 14 | 450   | 1.11 | 0.14 | 12 |
| 10 | K07H8.6a;K07H8.6c;K07H8.6b | TRFATSQQESNSMK          | 30 | 871   | 1.12 | 0.17 | 15 |
| 1  | K07H8.6a;K07H8.6c;K07H8.6b | ATIQYVYPQTPRTVEELK      | 17 | 2818  | 1.13 | 0.11 | 10 |
| 1  | K07H8.6a;K07H8.6c;K07H8.6b | VVIRAIYNTPSEEK          | 26 | 2038  | 1.13 | 0.14 | 13 |
| 1  | K07H8.6a;K07H8.6c;K07H8.6b | YLRQLPQWTENK            | 10 | 869   | 1.13 | 0.20 | 18 |
| 1  | K07H8.6a;K07H8.6c;K07H8.6b | YLRQLPQWTENK            | 36 | 1001  | 1.13 | 0.30 | 27 |
| 10 | K07H8.6a;K07H8.6c;K07H8.6b | YLRQLPQWTENK            | 44 | 3228  | 1.13 | 0.08 | 7  |
| 22 | K07H8.6a;K07H8.6c;K07H8.6b | GLEQIVVRGK              | 15 | 4094  | 1.14 | 0.10 | 8  |
| 22 | K07H8.6a;K07H8.6c;K07H8.6b | RAVINMLQVNILK           | 27 | 3114  | 1.14 | 0.14 | 12 |
| 1  | K07H8.6a;K07H8.6c;K07H8.6b | VVIRAIYNTPSEEK          | 33 | 1388  | 1.15 | 0.48 | 42 |
| 10 | K07H8.6a;K07H8.6c;K07H8.6b | YLRQLPQWTENK            | 59 | 3607  | 1.16 | 0.10 | 8  |
| 22 | K07H8.6a;K07H8.6c;K07H8.6b | CNYEREMFEK              | 22 | 3240  | 1.16 | 0.07 | 6  |
| 7  | K07H8.6a;K07H8.6c;K07H8.6b | TLANAGLDLSVYPLEK        | 35 | 1232  | 1.16 | 0.13 | 12 |
| 1  | K07H8.6a;K07H8.6c;K07H8.6b | GLEQIVVRGK              | 25 | 1713  | 1.16 | 0.15 | 13 |
| 7  | K07H8.6a;K07H8.6c;K07H8.6b | LVQQFESASTRYEK          | 12 | 2413  | 1.17 | 0.09 | 7  |
| 10 | K07H8.6a;K07H8.6c;K07H8.6b | VVIRAIYNTPSEEK          | 56 | 3945  | 1.17 | 0.08 | 7  |
| 22 | K07H8.6a;K07H8.6c;K07H8.6b | VVIRAIYNTPSEEK          | 12 | 2141  | 1.17 | 0.24 | 21 |
| 10 | K07H8.6a;K07H8.6c;K07H8.6b | YLRQLPQWTENK            | 14 | 2435  | 1.17 | 0.09 | 8  |
| 22 | K07H8.6a;K07H8.6c;K07H8.6b | GLEQIVVRGK              | 31 | 3585  | 1.17 | 0.13 | 11 |
| 10 | K07H8.6a;K07H8.6c;K07H8.6b | MFSLMAK                 | 38 | 2501  | 1.17 | 0.09 | 8  |
| 10 | K07H8.6a;K07H8.6c;K07H8.6b | LVQQFESASTRYEK          | 12 | 1178  | 1.17 | 0.23 | 20 |
| 10 | K07H8.6a;K07H8.6c;K07H8.6b | VVYGENEIEMYK            | 47 | 1712  | 1.18 | 0.18 | 15 |
| 10 | K07H8.6a;K07H8.6c;K07H8.6b | LVQQFESASTRYEK          | 31 | 1983  | 1.18 | 0.15 | 13 |
| 10 | K07H8.6a;K07H8.6c;K07H8.6b | VVIRAIYNTPSEEK          | 39 | 1824  | 1.18 | 0.12 | 10 |
| 22 | K07H8.6a;K07H8.6c;K07H8.6b | TRFATSQQESNSMK          | 63 | 4310  | 1.19 | 0.13 | 11 |
| 10 | K07H8.6a;K07H8.6c;K07H8.6b | VVYGENEIEMYK            | 56 | 2468  | 1.19 | 0.12 | 10 |
| 22 | K07H8.6a;K07H8.6c;K07H8.6b | LVQQFESASTRYEK          | 25 | 2858  | 1.19 | 0.11 | 9  |
| 10 | K07H8.6a;K07H8.6c;K07H8.6b | QYNIIWLNK               | 43 | 1275  | 1.19 | 0.13 | 11 |
| 10 | K07H8.6a;K07H8.6c;K07H8.6b | RAVINMLQVNILK           | 33 | 2870  | 1.19 | 0.19 | 16 |
| 22 | K07H8.6a;K07H8.6c;K07H8.6b | LLSNVQEK                | 17 | 494   | 1.20 | 0.26 | 21 |
| 7  | K07H8.6a;K07H8.6c;K07H8.6b | MFSLMAK                 | 10 | 5982  | 1.20 | 0.20 | 17 |
| 10 | K07H8.6a;K07H8.6c;K07H8.6b | VVYGENEIEMYK            | 48 | 1393  | 1.21 | 0.14 | 11 |
| 22 | K07H8.6a;K07H8.6c;K07H8.6b | LLSNVQEK                | 11 | 950   | 1.21 | 0.31 | 26 |
| 22 | K07H8.6a;K07H8.6c;K07H8.6b | LLSNVQEK                | 13 | 882   | 1.21 | 0.28 | 23 |
| 10 | K07H8.6a;K07H8.6c;K07H8.6b | QYNIIWLNK               | 49 | 1072  | 1.22 | 0.16 | 13 |
| 10 | K07H8.6a;K07H8.6c;K07H8.6b | VVIRAIYNTPSEEK          | 19 | 1773  | 1.22 | 0.27 | 22 |
| 22 | K07H8.6a;K07H8.6c;K07H8.6b | NIAPLK                  | 15 | 2122  | 1.22 | 0.27 | 22 |
| 10 | K07H8.6a;K07H8.6c;K07H8.6b | MFSLMAK                 | 11 | 769   | 1.22 | 0.20 | 16 |
| 1  | K07H8.6a;K07H8.6c;K07H8.6b | VYQHVAK                 | 24 | 2433  | 1.22 | 0.32 | 26 |
| 22 | K07H8.6a;K07H8.6c;K07H8.6b | VVIRAIYNTPSEEK          | 29 | 1765  | 1.23 | 0.20 | 16 |
| 1  | K07H8.6a;K07H8.6c;K07H8.6b | GLEQIVVRGK              | 10 | 332   | 1.23 | 0.26 | 21 |
| 10 | K07H8.6a;K07H8.6c;K07H8.6b | GLEQIVVRGK              | 27 | 2177  | 1.23 | 0.13 | 10 |
| 22 | K07H8.6a;K07H8.6c;K07H8.6b | VVIRAIYNTPSEEK          | 21 | 4581  | 1.23 | 0.06 | 5  |
| 1  | K07H8.6a;K07H8.6c;K07H8.6b | TRFATSQQESNSMK          | 34 | 3137  | 1.23 | 0.07 | 6  |
| 1  | K07H8.6a;K07H8.6c;K07H8.6b | QYNIIWLNK               | 58 | 984   | 1.24 | 0.15 | 12 |
| 22 | K07H8.6a;K07H8.6c;K07H8.6b | LLSNVQEK                | 60 | 5517  | 1.24 | 0.10 | 8  |
| 22 | K07H8.6a;K07H8.6c;K07H8.6b | CNYEREMFEK              | 29 | 2617  | 1.24 | 0.12 | 9  |
| 1  | K07H8.6a;K07H8.6c;K07H8.6b | TLANAGLDLSVYPLEK        | 22 | 513   | 1.24 | 0.13 | 10 |
| 22 | K07H8.6a;K07H8.6c;K07H8.6b | ATIQYVYPQTPRTVEELK      | 15 | 4827  | 1.24 | 0.13 | 10 |
| 22 | K07H8.6a;K07H8.6c;K07H8.6b | LVQQFESASTRYEK          | 34 | 2261  | 1.25 | 0.15 | 12 |
| 10 | K07H8.6a;K07H8.6c;K07H8.6b | GLEQIVVRGK              | 27 | 2049  | 1.25 | 0.07 | 5  |
| 10 | K07H8.6a;K07H8.6c;K07H8.6b | VVIRAIYNTPSEEK          | 65 | 5975  | 1.25 | 0.09 | 7  |
| 22 | K07H8.6a;K07H8.6c;K07H8.6b | HNGRRYLEAPEYDEEEHREQITK | 11 | 28901 | 1.27 | 0.12 | 10 |
| 10 | K07H8.6a;K07H8.6c;K07H8.6b | MFSLMAK                 | 33 | 1647  | 1.27 | 0.16 | 12 |
| 10 | K07H8.6a;K07H8.6c;K07H8.6b | VYQHVAK                 | 32 | 1805  | 1.28 | 0.07 | 5  |
| 10 | K07H8.6a;K07H8.6c;K07H8.6b | VVYGENEIEMYK            | 53 | 2160  | 1.29 | 0.12 | 9  |
| 22 | K07H8.6a;K07H8.6c;K07H8.6b | CNYEREMFEK              | 25 | 2750  | 1.29 | 0.20 | 16 |
| 10 | K07H8.6a;K07H8.6c;K07H8.6b | ATIQYVYPQTPRTVEELK      | 15 | 2558  | 1.29 | 0.16 | 12 |
| 10 | K07H8.6a;K07H8.6c;K07H8.6b | QYNIIWLNK               | 26 | 566   | 1.33 | 0.16 | 12 |
| 10 | K07H8.6a;K07H8.6c;K07H8.6b | VVYGENEIEMYK            | 63 | 1558  | 1.34 | 0.12 | 9  |
| 10 | K07H8.6a;K07H8.6c;K07H8.6b | ATIQYVYPQTPRTVEELK      | 37 | 8172  | 1.34 | 0.11 | 8  |
| 22 | K07H8.6a;K07H8.6c;K07H8.6b | RAVINMLQVNILK           | 24 | 2829  | 1.34 | 0.17 | 12 |
| 22 | K07H8.6a;K07H8.6c;K07H8.6b | RAVINMLQVNILK           | 38 | 4233  | 1.35 | 0.15 | 11 |

|    |                            |                          |    |       |      |      |    |
|----|----------------------------|--------------------------|----|-------|------|------|----|
| 10 | K07H8.6a;K07H8.6c;K07H8.6b | GLEQIVVRGK               | 24 | 911   | 1.36 | 0.22 | 16 |
| 1  | K07H8.6a;K07H8.6c;K07H8.6b | MFSLMAK                  | 11 | 4653  | 1.36 | 0.13 | 10 |
| 10 | K07H8.6a;K07H8.6c;K07H8.6b | VYQHVAK                  | 24 | 2402  | 1.37 | 0.07 | 5  |
| 22 | K07H8.6a;K07H8.6c;K07H8.6b | CNYEREMFEK               | 38 | 3516  | 1.37 | 0.15 | 11 |
| 1  | K07H8.6a;K07H8.6c;K07H8.6b | VVIRAIYNTPSEEK           | 41 | 980   | 1.37 | 0.07 | 5  |
| 10 | K07H8.6a;K07H8.6c;K07H8.6b | MFSLMAK                  | 11 | 3109  | 1.37 | 0.17 | 12 |
| 10 | K07H8.6a;K07H8.6c;K07H8.6b | GLEQIVVRGK               | 32 | 3607  | 1.37 | 0.17 | 13 |
| 10 | K07H8.6a;K07H8.6c;K07H8.6b | RAVINMLQVNILK            | 38 | 3017  | 1.38 | 0.13 | 10 |
| 1  | K07H8.6a;K07H8.6c;K07H8.6b | HNGRRYLEAEPEYDEEEHREQITK | 17 | 4530  | 1.38 | 0.14 | 10 |
| 10 | K07H8.6a;K07H8.6c;K07H8.6b | VVYGENEIEMYK             | 38 | 2303  | 1.39 | 0.18 | 13 |
| 1  | K07H8.6a;K07H8.6c;K07H8.6b | MFSLMAK                  | 14 | 877   | 1.39 | 0.25 | 18 |
| 22 | K07H8.6a;K07H8.6c;K07H8.6b | LLSNVQEK                 | 41 | 3105  | 1.40 | 0.14 | 10 |
| 22 | K07H8.6a;K07H8.6c;K07H8.6b | VYQHVAK                  | 14 | 7033  | 1.40 | 0.19 | 14 |
| 10 | K07H8.6a;K07H8.6c;K07H8.6b | VYQHVAK                  | 38 | 21429 | 1.40 | 0.08 | 5  |
| 10 | K07H8.6a;K07H8.6c;K07H8.6b | VVIRAIYNTPSEEK           | 17 | 1582  | 1.40 | 0.14 | 10 |
| 10 | K07H8.6a;K07H8.6c;K07H8.6b | EENFQRIEK                | 16 | 4513  | 1.41 | 0.24 | 17 |
| 22 | K07H8.6a;K07H8.6c;K07H8.6b | VVIRAIYNTPSEEK           | 62 | 6127  | 1.42 | 0.06 | 4  |
| 1  | K07H8.6a;K07H8.6c;K07H8.6b | MFSLMAK                  | 13 | 1592  | 1.43 | 0.15 | 10 |
| 22 | K07H8.6a;K07H8.6c;K07H8.6b | EENFQRIEK                | 16 | 2894  | 1.44 | 0.31 | 22 |
| 10 | K07H8.6a;K07H8.6c;K07H8.6b | VYQHVAK                  | 13 | 1294  | 1.44 | 0.12 | 8  |
| 10 | K07H8.6a;K07H8.6c;K07H8.6b | VVIRAIYNTPSEEK           | 14 | 1617  | 1.45 | 0.14 | 9  |
| 22 | K07H8.6a;K07H8.6c;K07H8.6b | GLEQIVVRGK               | 36 | 2608  | 1.45 | 0.19 | 13 |
| 1  | K07H8.6a;K07H8.6c;K07H8.6b | TLANAGLDLSVYPLEK         | 17 | 679   | 1.45 | 0.21 | 15 |
| 10 | K07H8.6a;K07H8.6c;K07H8.6b | MFSLMAK                  | 31 | 5381  | 1.45 | 0.07 | 5  |
| 10 | K07H8.6a;K07H8.6c;K07H8.6b | LLSNVQEK                 | 12 | 391   | 1.46 | 0.13 | 9  |
| 10 | K07H8.6a;K07H8.6c;K07H8.6b | VVYGENEIEMYK             | 36 | 1037  | 1.47 | 0.17 | 12 |
| 1  | K07H8.6a;K07H8.6c;K07H8.6b | VYQHVAK                  | 18 | 1162  | 1.48 | 0.19 | 13 |
| 10 | K07H8.6a;K07H8.6c;K07H8.6b | VVIRAIYNTPSEEK           | 24 | 1175  | 1.49 | 0.15 | 10 |
| 10 | K07H8.6a;K07H8.6c;K07H8.6b | GLEQIVVRGK               | 18 | 4414  | 1.49 | 0.13 | 9  |
| 1  | K07H8.6a;K07H8.6c;K07H8.6b | TRFATSQQESNSMK           | 39 | 2845  | 1.50 | 0.03 | 2  |
| 22 | K07H8.6a;K07H8.6c;K07H8.6b | TRFATSQQESNSMK           | 26 | 8736  | 1.52 | 0.10 | 7  |
| 10 | K07H8.6a;K07H8.6c;K07H8.6b | RAVINMLQVNILK            | 42 | 2643  | 1.52 | 0.16 | 11 |
| 10 | K07H8.6a;K07H8.6c;K07H8.6b | VVYGENEIEMYK             | 42 | 1887  | 1.52 | 0.12 | 8  |
| 10 | K07H8.6a;K07H8.6c;K07H8.6b | VVYGENEIEMYK             | 29 | 1604  | 1.54 | 0.13 | 8  |
| 22 | K07H8.6a;K07H8.6c;K07H8.6b | HNGRRYLEAEPEYDEEEHREQITK | 14 | 13472 | 1.54 | 0.16 | 11 |
| 10 | K07H8.6a;K07H8.6c;K07H8.6b | MFSLMAK                  | 11 | 560   | 1.54 | 0.14 | 9  |
| 22 | K07H8.6a;K07H8.6c;K07H8.6b | VYQHVAK                  | 14 | 8297  | 1.54 | 0.17 | 11 |
| 7  | K07H8.6a;K07H8.6c;K07H8.6b | VVIRAIYNTPSEEK           | 56 | 3357  | 1.55 | 0.18 | 12 |
| 10 | K07H8.6a;K07H8.6c;K07H8.6b | VVIRAIYNTPSEEK           | 22 | 3220  | 1.55 | 0.15 | 10 |
| 10 | K07H8.6a;K07H8.6c;K07H8.6b | QYNIIWLNK                | 38 | 1292  | 1.55 | 0.22 | 14 |
| 1  | K07H8.6a;K07H8.6c;K07H8.6b | ATIQYVYPQTPRTVEELK       | 10 | 2098  | 1.56 | 0.10 | 6  |
| 10 | K07H8.6a;K07H8.6c;K07H8.6b | VVYGENEIEMYK             | 41 | 2540  | 1.56 | 0.10 | 6  |
| 22 | K07H8.6a;K07H8.6c;K07H8.6b | TRFATSQQESNSMK           | 38 | 13508 | 1.57 | 0.18 | 11 |
| 1  | K07H8.6a;K07H8.6c;K07H8.6b | GLEQIVVRGK               | 31 | 590   | 1.57 | 0.26 | 17 |
| 22 | K07H8.6a;K07H8.6c;K07H8.6b | ATIQYVYPQTPRTVEELK       | 17 | 4967  | 1.58 | 0.15 | 10 |
| 7  | K07H8.6a;K07H8.6c;K07H8.6b | TRFATSQQESNSMK           | 25 | 2816  | 1.58 | 0.16 | 10 |
| 7  | K07H8.6a;K07H8.6c;K07H8.6b | TRFATSQQESNSMK           | 21 | 4428  | 1.59 | 0.13 | 8  |
| 22 | K07H8.6a;K07H8.6c;K07H8.6b | TRFATSQQESNSMK           | 80 | 2642  | 1.59 | 0.11 | 7  |
| 22 | K07H8.6a;K07H8.6c;K07H8.6b | GLEQIVVRGK               | 11 | 1989  | 1.59 | 0.08 | 5  |
| 1  | K07H8.6a;K07H8.6c;K07H8.6b | VVIRAIYNTPSEEK           | 16 | 755   | 1.60 | 0.26 | 16 |
| 22 | K07H8.6a;K07H8.6c;K07H8.6b | VVIRAIYNTPSEEK           | 62 | 4070  | 1.60 | 0.12 | 7  |
| 7  | K07H8.6a;K07H8.6c;K07H8.6b | GLEQIVVRGK               | 13 | 10139 | 1.60 | 0.13 | 8  |
| 1  | K07H8.6a;K07H8.6c;K07H8.6b | VVIRAIYNTPSEEK           | 37 | 1958  | 1.60 | 0.18 | 11 |
| 10 | K07H8.6a;K07H8.6c;K07H8.6b | SEPRFVVLMK               | 15 | 4804  | 1.61 | 0.07 | 4  |
| 22 | K07H8.6a;K07H8.6c;K07H8.6b | EENFQRIEK                | 23 | 2417  | 1.61 | 0.26 | 16 |
| 10 | K07H8.6a;K07H8.6c;K07H8.6b | VVIRAIYNTPSEEK           | 53 | 6402  | 1.62 | 0.08 | 5  |
| 10 | K07H8.6a;K07H8.6c;K07H8.6b | EENFQRIEK                | 16 | 4085  | 1.62 | 0.37 | 23 |
| 10 | K07H8.6a;K07H8.6c;K07H8.6b | CNYEREMFEK               | 28 | 2101  | 1.63 | 0.27 | 17 |
| 22 | K07H8.6a;K07H8.6c;K07H8.6b | GLEQIVVRGK               | 15 | 1013  | 1.66 | 0.11 | 7  |
| 10 | K07H8.6a;K07H8.6c;K07H8.6b | TRFATSQQESNSMK           | 14 | 7166  | 1.66 | 0.10 | 6  |
| 22 | K07H8.6a;K07H8.6c;K07H8.6b | MFSLMAK                  | 37 | 12430 | 1.66 | 0.11 | 6  |
| 10 | K07H8.6a;K07H8.6c;K07H8.6b | ATIQYVYPQTPRTVEELK       | 13 | 3884  | 1.67 | 0.19 | 12 |
| 10 | K07H8.6a;K07H8.6c;K07H8.6b | RAVINMLQVNILK            | 21 | 1869  | 1.67 | 0.23 | 14 |
| 22 | K07H8.6a;K07H8.6c;K07H8.6b | TRFATSQQESNSMK           | 78 | 2546  | 1.68 | 0.08 | 5  |
| 10 | K07H8.6a;K07H8.6c;K07H8.6b | QYNIIWLNK                | 48 | 1126  | 1.68 | 0.13 | 8  |
| 22 | K07H8.6a;K07H8.6c;K07H8.6b | VVIRAIYNTPSEEK           | 45 | 1739  | 1.69 | 0.10 | 6  |
| 22 | K07H8.6a;K07H8.6c;K07H8.6b | GLEQIVVRGK               | 36 | 3201  | 1.69 | 0.12 | 7  |
| 10 | K07H8.6a;K07H8.6c;K07H8.6b | NIAPLK                   | 13 | 1378  | 1.71 | 0.07 | 4  |
| 10 | K07H8.6a;K07H8.6c;K07H8.6b | VVIRAIYNTPSEEK           | 46 | 4261  | 1.72 | 0.14 | 8  |
| 22 | K07H8.6a;K07H8.6c;K07H8.6b | MFSLMAK                  | 10 | 1094  | 1.72 | 0.21 | 12 |
| 10 | K07H8.6a;K07H8.6c;K07H8.6b | MFSLMAK                  | 21 | 1041  | 1.73 | 0.24 | 14 |
| 1  | K07H8.6a;K07H8.6c;K07H8.6b | ATIQYVYPQTPRTVEELK       | 21 | 1764  | 1.74 | 0.13 | 8  |
| 10 | K07H8.6a;K07H8.6c;K07H8.6b | VVIRAIYNTPSEEK           | 27 | 2454  | 1.76 | 0.24 | 14 |
| 10 | K07H8.6a;K07H8.6c;K07H8.6b | LVQQFESASTRYEK           | 10 | 8344  | 1.78 | 0.09 | 5  |
| 1  | K07H8.6a;K07H8.6c;K07H8.6b | VVIRAIYNTPSEEK           | 13 | 286   | 1.78 | 0.09 | 5  |
| 10 | K07H8.6a;K07H8.6c;K07H8.6b | VYQHVAK                  | 31 | 17554 | 1.78 | 0.09 | 5  |
| 22 | K07H8.6a;K07H8.6c;K07H8.6b | LLSNVQEK                 | 24 | 765   | 1.78 | 0.19 | 11 |
| 10 | K07H8.6a;K07H8.6c;K07H8.6b | TRFATSQQESNSMK           | 34 | 9990  | 1.79 | 0.11 | 6  |
| 10 | K07H8.6a;K07H8.6c;K07H8.6b | VVIRAIYNTPSEEK           | 31 | 1370  | 1.81 | 0.19 | 11 |
| 7  | K07H8.6a;K07H8.6c;K07H8.6b | VVIRAIYNTPSEEK           | 45 | 2426  | 1.82 | 0.10 | 6  |
| 10 | K07H8.6a;K07H8.6c;K07H8.6b | YLRQLPQWTE NK            | 15 | 1716  | 1.82 | 0.06 | 3  |
| 22 | K07H8.6a;K07H8.6c;K07H8.6b | MFSLMAK                  | 36 | 11068 | 1.85 | 0.07 | 4  |
| 22 | K07H8.6a;K07H8.6c;K07H8.6b | TRFATSQQESNSMK           | 28 | 10835 | 1.85 | 0.15 | 8  |
| 10 | K07H8.6a;K07H8.6c;K07H8.6b | VVIRAIYNTPSEEK           | 49 | 2736  | 1.86 | 0.09 | 5  |
| 10 | K07H8.6a;K07H8.6c;K07H8.6b | YLRQLPQWTE NK            | 16 | 4571  | 1.86 | 0.13 | 7  |
| 1  | K07H8.6a;K07H8.6c;K07H8.6b | QYNIIWLNK                | 44 | 1006  | 1.88 | 0.19 | 10 |
| 22 | K07H8.6a;K07H8.6c;K07H8.6b | HQLVSAFTLNTMELIYAGEK     | 13 | 2124  | 1.89 | 0.15 | 8  |
| 7  | K07H8.6a;K07H8.6c;K07H8.6b | GLEQIVVRGK               | 19 | 7935  | 1.89 | 0.14 | 8  |
| 22 | K07H8.6a;K07H8.6c;K07H8.6b | MFSLMAK                  | 12 | 1216  | 1.91 | 0.21 | 11 |
| 10 | K07H8.6a;K07H8.6c;K07H8.6b | TLANAGLDLSVYPLEK         | 53 | 1682  | 1.94 | 0.06 | 3  |
| 10 | K07H8.6a;K07H8.6c;K07H8.6b | MFSLMAK                  | 17 | 1049  | 1.96 | 0.09 | 5  |
| 22 | K07H8.6a;K07H8.6c;K07H8.6b | TRFATSQQESNSMK           | 30 | 10558 | 1.96 | 0.20 | 10 |
| 1  | K07H8.6a;K07H8.6c;K07H8.6b | QYNIIWLNK                | 29 | 896   | 1.99 | 0.15 | 8  |
| 10 | K07H8.6a;K07H8.6c;K07H8.6b | VYQHVAK                  | 13 | 5856  | 2.03 | 0.09 | 4  |
| 10 | K07H8.6a;K07H8.6c;K07H8.6b | VVIRAIYNTPSEEK           | 37 | 2134  | 2.03 | 0.10 | 5  |
| 1  | K07H8.6a;K07H8.6c;K07H8.6b | MFSLMAK                  | 14 | 891   | 2.05 | 0.20 | 10 |
| 1  | K07H8.6a;K07H8.6c;K07H8.6b | QYNIIWLNK                | 31 | 641   | 2.05 | 0.22 | 11 |
| 10 | K07H8.6a;K07H8.6c;K07H8.6b | QYNIIWLNK                | 32 | 712   | 2.06 | 0.14 | 7  |
| 10 | K07H8.6a;K07H8.6c;K07H8.6b | SEPRFVVLMK               | 13 | 4807  | 2.06 | 0.11 | 5  |
| 10 | K07H8.6a;K07H8.6c;K07H8.6b | MFSLMAK                  | 12 | 1036  | 2.07 | 0.17 | 8  |
| 10 | K07H8.6a;K07H8.6c;K07H8.6b | SEPRFVVLMK               | 16 | 8118  | 2.07 | 0.10 | 5  |

|    |                            |                          |    |       |      |      |    |
|----|----------------------------|--------------------------|----|-------|------|------|----|
| 10 | K07H8.6a;K07H8.6c;K07H8.6b | VVIRAIYNTPSEEK           | 35 | 2024  | 2.07 | 0.19 | 9  |
| 10 | K07H8.6a;K07H8.6c;K07H8.6b | QYNIIWLNK                | 20 | 1174  | 2.08 | 0.13 | 6  |
| 22 | K07H8.6a;K07H8.6c;K07H8.6b | VVIRAIYNTPSEEK           | 47 | 1229  | 2.08 | 0.08 | 4  |
| 10 | K07H8.6a;K07H8.6c;K07H8.6b | LLSNVQEK                 | 43 | 9870  | 2.09 | 0.09 | 4  |
| 10 | K07H8.6a;K07H8.6c;K07H8.6b | QIEQGEAELEAAHTVARIVK     | 22 | 11757 | 2.09 | 0.12 | 6  |
| 10 | K07H8.6a;K07H8.6c;K07H8.6b | QYNIIWLNK                | 44 | 1436  | 2.10 | 0.13 | 6  |
| 10 | K07H8.6a;K07H8.6c;K07H8.6b | YLRQLPQWTE NK            | 27 | 2432  | 2.11 | 0.12 | 6  |
| 22 | K07H8.6a;K07H8.6c;K07H8.6b | QYNIIWLNK                | 10 | 852   | 2.11 | 0.29 | 14 |
| 10 | K07H8.6a;K07H8.6c;K07H8.6b | TRFATSQQESNSMK           | 40 | 12697 | 2.14 | 0.11 | 5  |
| 1  | K07H8.6a;K07H8.6c;K07H8.6b | VVIRAIYNTPSEEK           | 32 | 740   | 2.16 | 0.19 | 9  |
| 10 | K07H8.6a;K07H8.6c;K07H8.6b | TLANAGLDLSVYPLEK         | 40 | 1701  | 2.17 | 0.23 | 11 |
| 1  | K07H8.6a;K07H8.6c;K07H8.6b | QYNIIWLNK                | 36 | 784   | 2.18 | 0.13 | 6  |
| 10 | K07H8.6a;K07H8.6c;K07H8.6b | VVIRAIYNTPSEEK           | 27 | 1774  | 2.18 | 0.19 | 9  |
| 10 | K07H8.6a;K07H8.6c;K07H8.6b | LLSNVQEK                 | 52 | 6525  | 2.20 | 0.11 | 5  |
| 1  | K07H8.6a;K07H8.6c;K07H8.6b | VYQH VAK                 | 24 | 1483  | 2.21 | 0.25 | 11 |
| 10 | K07H8.6a;K07H8.6c;K07H8.6b | SEPRFVVLMK               | 17 | 3709  | 2.22 | 0.09 | 4  |
| 1  | K07H8.6a;K07H8.6c;K07H8.6b | QYNIIWLNK                | 36 | 990   | 2.22 | 0.17 | 8  |
| 10 | K07H8.6a;K07H8.6c;K07H8.6b | VYQHVAK                  | 19 | 7373  | 2.23 | 0.14 | 6  |
| 10 | K07H8.6a;K07H8.6c;K07H8.6b | VVIRAIYNTPSEEK           | 20 | 1242  | 2.24 | 0.16 | 7  |
| 7  | K07H8.6a;K07H8.6c;K07H8.6b | TRFATSQQESNSMK           | 16 | 2671  | 2.26 | 0.26 | 11 |
| 7  | K07H8.6a;K07H8.6c;K07H8.6b | TRFATSQQESNSMK           | 24 | 274   | 2.28 | 0.22 | 10 |
| 10 | K07H8.6a;K07H8.6c;K07H8.6b | TRFATSQQESNSMK           | 24 | 7767  | 2.29 | 0.07 | 3  |
| 10 | K07H8.6a;K07H8.6c;K07H8.6b | QYNIIWLNK                | 26 | 1152  | 2.39 | 0.12 | 5  |
| 10 | K07H8.6a;K07H8.6c;K07H8.6b | HNGRRYLEAEPEYDEEEHREQITK | 30 | 17771 | 2.42 | 0.06 | 3  |
| 22 | K07H8.6a;K07H8.6c;K07H8.6b | GLEQIVVRGK               | 32 | 2617  | 2.42 | 0.18 | 7  |
| 22 | K07H8.6a;K07H8.6c;K07H8.6b | QYNIIWLNK                | 46 | 2066  | 2.42 | 0.13 | 5  |
| 10 | K07H8.6a;K07H8.6c;K07H8.6b | MFSLMAK                  | 16 | 1990  | 2.43 | 0.16 | 7  |
| 1  | K07H8.6a;K07H8.6c;K07H8.6b | QYNIIWLNK                | 32 | 935   | 2.44 | 0.11 | 5  |
| 10 | K07H8.6a;K07H8.6c;K07H8.6b | CNYEREMFEK               | 21 | 1386  | 2.47 | 0.18 | 7  |
| 22 | K07H8.6a;K07H8.6c;K07H8.6b | MFSLMAK                  | 21 | 4448  | 2.51 | 0.10 | 4  |
| 1  | K07H8.6a;K07H8.6c;K07H8.6b | LVQQFESASTRYEK           | 11 | 398   | 2.52 | 0.22 | 9  |
| 1  | K07H8.6a;K07H8.6c;K07H8.6b | GLEQIVVRGK               | 40 | 622   | 2.52 | 0.18 | 7  |
| 22 | K07H8.6a;K07H8.6c;K07H8.6b | TRFATSQQESNSMK           | 30 | 12673 | 2.53 | 0.19 | 8  |
| 22 | K07H8.6a;K07H8.6c;K07H8.6b | LVQQFESASTRYEK           | 49 | 1463  | 2.55 | 0.17 | 7  |
| 7  | K07H8.6a;K07H8.6c;K07H8.6b | TLANAGLDLSVYPLEK         | 44 | 1113  | 2.55 | 0.33 | 13 |
| 22 | K07H8.6a;K07H8.6c;K07H8.6b | LVQQFESASTRYEK           | 40 | 1445  | 2.58 | 0.11 | 4  |
| 7  | K07H8.6a;K07H8.6c;K07H8.6b | TRFATSQQESNSMK           | 19 | 5185  | 2.69 | 0.10 | 4  |
| 22 | K07H8.6a;K07H8.6c;K07H8.6b | MFSLMAK                  | 24 | 5742  | 2.71 | 0.09 | 3  |
| 22 | K07H8.6a;K07H8.6c;K07H8.6b | CNYEREMFEK               | 23 | 3294  | 2.73 | 0.11 | 4  |
| 10 | K07H8.6a;K07H8.6c;K07H8.6b | MFSLMAK                  | 33 | 3098  | 2.77 | 0.13 | 5  |
| 1  | K07H8.6a;K07H8.6c;K07H8.6b | MFSLMAK                  | 19 | 3439  | 2.82 | 0.07 | 2  |
| 1  | K07H8.6a;K07H8.6c;K07H8.6b | LLSNVQEK                 | 27 | 1266  | 2.85 | 0.22 | 8  |
| 22 | K07H8.6a;K07H8.6c;K07H8.6b | TRFATSQQESNSMK           | 16 | 9611  | 2.87 | 0.36 | 13 |
| 1  | K07H8.6a;K07H8.6c;K07H8.6b | GLEQIVVRGK               | 35 | 2586  | 2.88 | 0.14 | 5  |
| 1  | K07H8.6a;K07H8.6c;K07H8.6b | MFSLMAK                  | 25 | 4074  | 2.88 | 0.12 | 4  |
| 10 | K07H8.6a;K07H8.6c;K07H8.6b | YLRQLPQWTE NK            | 15 | 6143  | 2.90 | 0.18 | 6  |
| 22 | K07H8.6a;K07H8.6c;K07H8.6b | TLANAGLDLSVYPLEK         | 54 | 1246  | 2.92 | 0.11 | 4  |
| 10 | K07H8.6a;K07H8.6c;K07H8.6b | YLRQLPQWTE NK            | 23 | 6534  | 2.94 | 0.13 | 4  |
| 22 | K07H8.6a;K07H8.6c;K07H8.6b | LLSNVQEK                 | 23 | 2232  | 3.04 | 0.21 | 7  |
| 10 | K07H8.6a;K07H8.6c;K07H8.6b | LVQQFESASTRYEK           | 29 | 1962  | 3.05 | 0.08 | 2  |
| 22 | K07H8.6a;K07H8.6c;K07H8.6b | QYNIIWLNK                | 31 | 946   | 3.16 | 0.18 | 6  |
| 22 | K07H8.6a;K07H8.6c;K07H8.6b | GLEQIVVRGK               | 34 | 3345  | 3.17 | 0.10 | 3  |
| 1  | K07H8.6a;K07H8.6c;K07H8.6b | TRFATSQQESNSMK           | 23 | 3243  | 3.18 | 0.19 | 6  |
| 22 | K07H8.6a;K07H8.6c;K07H8.6b | TRFATSQQESNSMK           | 33 | 954   | 3.24 | 0.22 | 7  |
| 7  | K07H8.6a;K07H8.6c;K07H8.6b | LLSNVQEK                 | 24 | 2665  | 3.26 | 0.18 | 6  |
| 10 | K07H8.6a;K07H8.6c;K07H8.6b | LVQQFESASTRYEK           | 20 | 1180  | 3.33 | 0.10 | 3  |
| 7  | K07H8.6a;K07H8.6c;K07H8.6b | LLSNVQEK                 | 14 | 1880  | 3.37 | 0.14 | 4  |
| 1  | K07H8.6a;K07H8.6c;K07H8.6b | MFSLMAK                  | 18 | 1601  | 3.44 | 0.16 | 5  |
| 10 | K07H8.6a;K07H8.6c;K07H8.6b | MFSLMAK                  | 18 | 1194  | 3.46 | 0.05 | 1  |
| 22 | K07H8.6a;K07H8.6c;K07H8.6b | GLEQIVVRGK               | 40 | 2956  | 3.47 | 0.14 | 4  |
| 10 | K07H8.6a;K07H8.6c;K07H8.6b | QYNIIWLNK                | 24 | 660   | 3.48 | 0.18 | 5  |
| 10 | K07H8.6a;K07H8.6c;K07H8.6b | YLRQLPQWTE NK            | 21 | 3465  | 3.69 | 0.09 | 2  |
| 22 | K07H8.6a;K07H8.6c;K07H8.6b | TLANAGLDLSVYPLEK         | 67 | 1567  | 3.73 | 0.17 | 5  |
| 10 | K07H8.6a;K07H8.6c;K07H8.6b | TRFATSQQESNSMK           | 20 | 4197  | 3.73 | 0.20 | 5  |
| 1  | K07H8.6a;K07H8.6c;K07H8.6b | GLEQIVVRGK               | 20 | 841   | 3.89 | 0.25 | 7  |
| 10 | K07H8.6a;K07H8.6c;K07H8.6b | VVIRAIYNTPSEEK           | 51 | 1447  | 3.89 | 0.22 | 6  |
| 7  | K07H8.6a;K07H8.6c;K07H8.6b | LLSNVQEK                 | 26 | 1484  | 3.97 | 0.17 | 4  |
| 10 | K07H8.6a;K07H8.6c;K07H8.6b | MFSLMAK                  | 48 | 11336 | 4.07 | 0.14 | 3  |
| 1  | K07H8.6a;K07H8.6c;K07H8.6b | GLEQIVVRGK               | 35 | 2880  | 4.11 | 0.28 | 7  |
| 10 | K07H8.6a;K07H8.6c;K07H8.6b | GLEQIVVRGK               | 51 | 21208 | 4.23 | 0.16 | 4  |
| 10 | K07H8.6a;K07H8.6c;K07H8.6b | MFSLMAK                  | 35 | 8962  | 4.24 | 0.14 | 3  |
| 10 | K07H8.6a;K07H8.6c;K07H8.6b | MFSLMAK                  | 21 | 1665  | 4.32 | 0.18 | 4  |
| 10 | K07H8.6a;K07H8.6c;K07H8.6b | GLEQIVVRGK               | 48 | 17770 | 4.32 | 0.10 | 2  |
| 1  | K07H8.6a;K07H8.6c;K07H8.6b | LLSNVQEK                 | 47 | 1484  | 4.35 | 0.24 | 6  |
| 1  | K07H8.6a;K07H8.6c;K07H8.6b | LLSNVQEK                 | 32 | 1234  | 4.41 | 0.20 | 5  |
| 7  | K07H8.6a;K07H8.6c;K07H8.6b | LVQQFESASTRYEK           | 42 | 1349  | 4.43 | 0.29 | 7  |
| 10 | K07H8.6a;K07H8.6c;K07H8.6b | NIAPLK                   | 12 | 1108  | 4.62 | 0.12 | 3  |
| 7  | K07H8.6a;K07H8.6c;K07H8.6b | LLSNVQEK                 | 34 | 1895  | 4.66 | 0.22 | 5  |
| 7  | K07H8.6a;K07H8.6c;K07H8.6b | TLANAGLDLSVYPLEK         | 60 | 1678  | 4.73 | 0.13 | 3  |
| 10 | K07H8.6a;K07H8.6c;K07H8.6b | LLSNVQEK                 | 36 | 2571  | 4.92 | 0.20 | 4  |
| 22 | K07H8.6a;K07H8.6c;K07H8.6b | TRFATSQQESNSMK           | 28 | 5178  | 5.04 | 0.32 | 6  |
| 10 | K07H8.6a;K07H8.6c;K07H8.6b | TRFATSQQESNSMK           | 48 | 3673  | 5.39 | 0.33 | 6  |
| 7  | K07H8.6a;K07H8.6c;K07H8.6b | QIEQGEAELEAAHTVARIVK     | 14 | 4810  | 5.47 | 0.36 | 6  |
| 10 | K07H8.6a;K07H8.6c;K07H8.6b | MFSLMAK                  | 33 | 1627  | 5.62 | 0.17 | 3  |
| 1  | K07H8.6a;K07H8.6c;K07H8.6b | TRFATSQQESNSMK           | 33 | 3327  | 5.67 | 0.11 | 2  |
| 10 | K07H8.6a;K07H8.6c;K07H8.6b | TRFATSQQESNSMK           | 66 | 894   | 5.67 | 0.13 | 2  |
| 22 | K07H8.6a;K07H8.6c;K07H8.6b | MFSLMAK                  | 34 | 3114  | 5.81 | 0.29 | 5  |
| 10 | K07H8.6a;K07H8.6c;K07H8.6b | TRFATSQQESNSMK           | 50 | 4021  | 5.97 | 0.29 | 5  |
| 10 | K07H8.6a;K07H8.6c;K07H8.6b | GLEQIVVRGK               | 16 | 1421  | 6.12 | 0.14 | 2  |
| 22 | K07H8.6a;K07H8.6c;K07H8.6b | TLANAGLDLSVYPLEK         | 34 | 919   | 6.20 | 0.18 | 3  |
| 7  | K07H8.6a;K07H8.6c;K07H8.6b | MFSLMAK                  | 19 | 1949  | 6.26 | 0.14 | 2  |
| 7  | K07H8.6a;K07H8.6c;K07H8.6b | MFSLMAK                  | 20 | 2011  | 6.43 | 0.18 | 3  |
| 10 | K07H8.6a;K07H8.6c;K07H8.6b | LLSNVQEK                 | 53 | 3026  | 6.47 | 0.15 | 2  |
| 7  | K07H8.6a;K07H8.6c;K07H8.6b | LLSNVQEK                 | 28 | 1766  | 6.52 | 0.33 | 5  |
| 22 | K07H8.6a;K07H8.6c;K07H8.6b | TRFATSQQESNSMK           | 31 | 5506  | 6.68 | 0.40 | 6  |
| 7  | K07H8.6a;K07H8.6c;K07H8.6b | TLANAGLDLSVYPLEK         | 47 | 1656  | 6.92 | 0.13 | 2  |
| 7  | K07H8.6a;K07H8.6c;K07H8.6b | TQIRGEELK                | 16 | 2361  | 6.93 | 0.39 | 6  |
| 22 | K07H8.6a;K07H8.6c;K07H8.6b | MFSLMAK                  | 30 | 2484  | 7.21 | 0.36 | 5  |
| 10 | K07H8.6a;K07H8.6c;K07H8.6b | TRFATSQQESNSMK           | 63 | 1167  | 7.36 | 0.14 | 2  |
| 10 | K07H8.6a;K07H8.6c;K07H8.6b | GLEQIVVRGK               | 26 | 2039  | 8.29 | 0.27 | 3  |
| 22 | K07H8.6a;K07H8.6c;K07H8.6b | MFSLMAK                  | 29 | 3578  | 8.88 | 0.30 | 3  |

|    |                                              |                        |    |       |       |      |    |
|----|----------------------------------------------|------------------------|----|-------|-------|------|----|
| 22 | K07H8.6a;K07H8.6c;K07H8.6b                   | MFSLMAK                | 30 | 2171  | 9.21  | 0.20 | 2  |
| 10 | K07H8.6a;K07H8.6c;K07H8.6b                   | TRFATSQQESNSMK         | 36 | 8763  | 9.80  | 0.27 | 3  |
| 10 | K07H8.6a;K07H8.6c;K07H8.6b                   | TRFATSQQESNSMK         | 40 | 8381  | 10.84 | 0.27 | 3  |
| 7  | K08E3.5a;K08E3.5b;K08E3.5c;K08E3.5e;K08E3.5f | ELIASQLRK              | 38 | 7496  | 1.42  | 0.14 | 10 |
| 7  | K08E3.5a;K08E3.5b;K08E3.5c;K08E3.5e;K08E3.5f | ELIASQLRK              | 35 | 8624  | 1.48  | 0.25 | 17 |
| 7  | K08E3.5a;K08E3.5b;K08E3.5c;K08E3.5e;K08E3.5f | ELIASQLRK              | 38 | 6112  | 1.81  | 0.05 | 3  |
| 7  | K08E3.5a;K08E3.5b;K08E3.5c;K08E3.5e;K08E3.5f | ELIASQLRK              | 34 | 3905  | 2.35  | 0.09 | 4  |
| 22 | K08E3.5c;K08E3.5b;K08E3.5a                   | IEPLPEGAIRPYK          | 24 | 5131  | 0.57  | 0.09 | 17 |
| 22 | K08E3.5c;K08E3.5b;K08E3.5a                   | SLGHVVDK               | 29 | 8175  | 0.99  | 0.08 | 9  |
| 22 | K08E3.5c;K08E3.5b;K08E3.5a                   | ELIASQLRK              | 24 | 5699  | 1.40  | 0.07 | 5  |
| 22 | K08E3.5c;K08E3.5b;K08E3.5a                   | ELIASQLRK              | 26 | 4738  | 1.45  | 0.08 | 6  |
| 10 | K08E3.5c;K08E3.5b;K08E3.5a;K08E3.5e;K08E3.5f | IEPLPEGAIRPYK          | 10 | 4640  | 0.71  | 0.08 | 12 |
| 10 | K08E3.5c;K08E3.5b;K08E3.5a;K08E3.5e;K08E3.5f | ELIASQLRK              | 38 | 7294  | 1.66  | 0.12 | 7  |
| 10 | K08E3.5c;K08E3.5b;K08E3.5a;K08E3.5e;K08E3.5f | ELIASQLRK              | 27 | 4975  | 1.78  | 0.12 | 7  |
| 22 | K08F11.3                                     | SFSFDHLERLSAVK         | 16 | 4578  | 0.39  | 0.27 | 68 |
| 1  | K08F11.3                                     | NEISLDELAK             | 38 | 1745  | 0.49  | 0.16 | 34 |
| 1  | K08F11.3                                     | NEISLDELAK             | 34 | 1641  | 0.50  | 0.12 | 24 |
| 1  | K08F11.3                                     | VMTALLGTYTEK           | 24 | 541   | 0.62  | 0.10 | 16 |
| 10 | K08F11.3                                     | VDETILLK               | 44 | 4362  | 0.68  | 0.13 | 19 |
| 1  | K08F11.3                                     | VMTALLGTYTEK           | 52 | 867   | 0.68  | 0.26 | 38 |
| 10 | K08F11.3                                     | VDETILLK               | 32 | 3975  | 0.76  | 0.16 | 22 |
| 7  | K08F11.3                                     | VMTALLGTYTEK           | 15 | 1177  | 0.85  | 0.13 | 15 |
| 7  | K08F11.3                                     | VMTALLGTYTEK           | 26 | 647   | 0.88  | 0.17 | 19 |
| 22 | K08F11.3                                     | VMTALLGTYTEK           | 26 | 860   | 0.89  | 0.16 | 18 |
| 7  | K08F11.3                                     | FVTEHLK                | 40 | 10068 | 0.93  | 0.08 | 9  |
| 7  | K08F11.3                                     | FVTEHLK                | 18 | 14144 | 1.02  | 0.09 | 9  |
| 7  | K08F11.3                                     | QLQELRQYLNK            | 28 | 1521  | 1.05  | 0.07 | 6  |
| 22 | K08F11.3                                     | VMTALLGTYTEK           | 37 | 1552  | 1.12  | 0.09 | 8  |
| 7  | K08F11.3                                     | QLQELRQYLNK            | 15 | 1508  | 1.24  | 0.14 | 11 |
| 7  | K08F11.3                                     | GYSNFHTVQEK            | 82 | 5049  | 1.25  | 0.10 | 8  |
| 22 | K08F11.3                                     | VMTALLGTYTEK           | 12 | 652   | 1.29  | 0.26 | 20 |
| 22 | K08F11.3                                     | QLQELRQYLNK            | 13 | 1907  | 1.32  | 0.17 | 13 |
| 7  | K08F11.3                                     | GYSNFHTVQEK            | 64 | 3228  | 1.45  | 0.08 | 5  |
| 7  | K08F11.3                                     | SFSFDHLERLSAVK         | 12 | 6758  | 1.63  | 0.11 | 7  |
| 10 | K08F11.3                                     | QLQELRQYLNK            | 12 | 1398  | 1.94  | 0.11 | 6  |
| 10 | K08F11.3                                     | QLQELRQYLNK            | 14 | 1367  | 2.12  | 0.16 | 7  |
| 10 | K08F11.3                                     | GYSNFHTVQEK            | 66 | 6412  | 2.17  | 0.10 | 4  |
| 22 | K08F11.3                                     | GYSNFHTVQEK            | 90 | 10468 | 2.34  | 0.12 | 5  |
| 10 | K08F11.3                                     | NVAPQFYK               | 12 | 6037  | 2.36  | 0.09 | 4  |
| 10 | K08F11.3                                     | GYSNFHTVQEK            | 67 | 6007  | 2.57  | 0.12 | 5  |
| 10 | K08F11.3                                     | SFSFDHLERLSAVK         | 24 | 5112  | 2.97  | 0.17 | 6  |
| 10 | K08F4.7                                      | IHSIPEIK               | 27 | 9799  | 3.98  | 0.05 | 1  |
| 10 | K08F4.9                                      | VPGVEALVAGARNIDGAK     | 13 | 3713  | 0.35  | 0.16 | 47 |
| 10 | K08F4.9                                      | VPGVEALVAGARNIDGAK     | 37 | 4530  | 0.43  | 0.13 | 29 |
| 10 | K08F4.9                                      | ADARLHLIAVDVSNDSLENSVK | 86 | 6390  | 0.50  | 0.13 | 27 |
| 1  | K08F4.9                                      | ADARLHLIAVDVSNDSLENSVK | 40 | 991   | 0.52  | 0.18 | 34 |
| 10 | K08F4.9                                      | ADARLHLIAVDVSNDSLENSVK | 92 | 6993  | 0.52  | 0.14 | 26 |
| 22 | K08F4.9                                      | ADARLHLIAVDVSNDSLENSVK | 45 | 4700  | 0.62  | 0.24 | 39 |
| 10 | K08F4.9                                      | VPGVEALVAGARNIDGAK     | 11 | 1534  | 1.09  | 0.07 | 7  |
| 10 | K08F4.9                                      | VPGVEALVAGARNIDGAK     | 42 | 2520  | 1.15  | 0.16 | 14 |
| 10 | K08F4.9                                      | IVASIAK                | 31 | 2454  | 1.60  | 0.12 | 7  |
| 1  | K08F8.4                                      | IEGVIEHFQQK            | 36 | 1333  | 0.22  | 0.21 | 91 |
| 1  | K08F8.4                                      | IEGVIEHFQQK            | 42 | 1597  | 0.26  | 0.14 | 56 |
| 7  | K08F8.4                                      | IEGVIEHFQQK            | 49 | 2857  | 0.27  | 0.16 | 61 |
| 7  | K08F8.4                                      | IEGVIEHFQQK            | 51 | 3867  | 0.29  | 0.17 | 61 |
| 22 | K08F8.4                                      | IEGVIEHFQQK            | 49 | 2601  | 0.29  | 0.20 | 70 |
| 22 | K08F8.4                                      | IEGVIEHFQQK            | 42 | 3780  | 0.29  | 0.20 | 69 |
| 7  | K08F8.4                                      | IEGVIEHFQQK            | 71 | 5019  | 0.30  | 0.17 | 59 |
| 10 | K08F8.4                                      | IEGVIEHFQQK            | 55 | 5313  | 0.42  | 0.14 | 34 |
| 22 | K08F8.4                                      | IEGVIEHFQQK            | 36 | 2308  | 0.43  | 0.24 | 55 |
| 10 | K08F8.4                                      | IEGVIEHFQQK            | 46 | 4901  | 0.45  | 0.12 | 26 |
| 22 | K08F8.4                                      | IEGVIEHFQQK            | 31 | 1921  | 0.56  | 0.24 | 43 |
| 10 | K08F8.4                                      | IEGVIEHFQQK            | 24 | 2300  | 0.59  | 0.22 | 37 |
| 22 | K08F8.4                                      | YFLAESFASAK            | 30 | 936   | 0.61  | 0.18 | 29 |
| 22 | K08F8.4                                      | IEGVIEHFQQK            | 50 | 3352  | 0.63  | 0.09 | 14 |
| 1  | K08F8.4                                      | IEGVIEHFQQK            | 48 | 1399  | 0.64  | 0.08 | 12 |
| 7  | K08F8.4                                      | VLVQDWNTK              | 23 | 4021  | 0.66  | 0.09 | 14 |
| 22 | K08F8.4                                      | LFQAHDVNLSHIESRPSK     | 20 | 7440  | 0.67  | 0.17 | 26 |
| 1  | K08F8.4                                      | IEGVIEHFQQK            | 40 | 1536  | 0.71  | 0.19 | 26 |
| 10 | K08F8.4                                      | IEGVIEHFQQK            | 32 | 2441  | 0.73  | 0.12 | 17 |
| 22 | K08F8.4                                      | AGALAE TLK             | 30 | 1374  | 0.75  | 0.20 | 27 |
| 10 | K08F8.4                                      | IEGVIEHFQQK            | 37 | 4320  | 0.75  | 0.10 | 14 |
| 7  | K08F8.4                                      | IEGVIEHFQQK            | 43 | 3154  | 0.76  | 0.12 | 15 |
| 7  | K08F8.4                                      | IEGVIEHFQQK            | 60 | 4095  | 0.78  | 0.14 | 18 |
| 22 | K08F8.4                                      | IEGVIEHFQQK            | 50 | 2848  | 0.81  | 0.17 | 21 |
| 22 | K08F8.4                                      | YFLAESFASAK            | 41 | 641   | 0.85  | 0.10 | 12 |
| 22 | K08F8.4                                      | YFLAESFASAK            | 25 | 916   | 0.88  | 0.17 | 19 |
| 7  | K08F8.4                                      | LFQAHDVNLSHIESRPSK     | 18 | 8163  | 0.88  | 0.21 | 24 |
| 22 | K08F8.4                                      | LFQAHDVNLSHIESRPSK     | 11 | 7836  | 0.90  | 0.25 | 28 |
| 7  | K08F8.4                                      | LFQAHDVNLSHIESRPSK     | 16 | 8968  | 0.91  | 0.25 | 28 |
| 10 | K08F8.4                                      | IEGVIEHFQQK            | 46 | 3385  | 0.92  | 0.11 | 12 |
| 10 | K08F8.4                                      | LFQAHDVNLSHIESRPSK     | 16 | 6521  | 1.03  | 0.24 | 23 |
| 22 | K08F8.4                                      | IEGVIEHFQQK            | 23 | 3374  | 1.10  | 0.09 | 8  |
| 22 | K08F8.4                                      | IEGVIEHFQQK            | 42 | 3964  | 1.13  | 0.13 | 12 |
| 22 | K08F8.4                                      | LFQAHDVNLSHIESRPSK     | 12 | 5649  | 1.14  | 0.14 | 12 |
| 10 | K08F8.4                                      | YFLAESFASAK            | 52 | 1430  | 1.26  | 0.16 | 13 |
| 10 | K08F8.4                                      | YFLAESFASAK            | 59 | 1707  | 1.30  | 0.12 | 9  |
| 10 | K08F8.4                                      | LFQAHDVNLSHIESRPSK     | 16 | 5776  | 1.33  | 0.24 | 18 |
| 10 | K08F8.4                                      | LFQAHDVNLSHIESRPSK     | 26 | 7166  | 1.57  | 0.21 | 13 |
| 22 | K08F8.4                                      | LFQAHDVNLSHIESRPSK     | 22 | 5397  | 1.74  | 0.07 | 4  |
| 22 | K08F8.4                                      | YFLAESFASAK            | 45 | 935   | 2.00  | 0.11 | 6  |
| 22 | K08F8.4                                      | YFLAESFASAK            | 50 | 1197  | 2.23  | 0.21 | 9  |
| 10 | K08H10.1                                     | ISNAFTSLK              | 41 | 845   | 0.48  | 0.17 | 36 |
| 1  | K08H10.1                                     | ASDIADSFK              | 18 | 784   | 0.48  | 0.30 | 62 |
| 1  | K08H10.1                                     | VGDSISGAYDTVK          | 27 | 472   | 0.49  | 0.10 | 20 |
| 1  | K08H10.1                                     | VGDSISGAYDTVK          | 18 | 918   | 0.50  | 0.23 | 47 |
| 10 | K08H10.1                                     | ASDIADSFK              | 54 | 3299  | 0.50  | 0.16 | 31 |
| 10 | K08H10.1                                     | ASDIADSFK              | 49 | 2394  | 0.54  | 0.15 | 28 |
| 10 | K08H10.1                                     | ASDIADSFK              | 45 | 2658  | 0.57  | 0.15 | 27 |
| 7  | K08H10.1                                     | ESASEAADRLK            | 20 | 1263  | 0.58  | 0.32 | 55 |
| 10 | K08H10.1                                     | ASDIADSFK              | 68 | 2940  | 0.59  | 0.13 | 23 |

|             |               |    |      |      |      |    |
|-------------|---------------|----|------|------|------|----|
| 7 K08H10.1  | ASDIADSFK     | 15 | 2304 | 0.59 | 0.22 | 37 |
| 7 K08H10.1  | ESASEAADRLK   | 13 | 1228 | 0.60 | 0.22 | 37 |
| 22 K08H10.1 | ISNAFTSLK     | 36 | 1220 | 0.60 | 0.15 | 25 |
| 1 K08H10.1  | ISNAFTSLK     | 13 | 541  | 0.61 | 0.18 | 29 |
| 10 K08H10.1 | ISGAYDSVK     | 31 | 2256 | 0.62 | 0.15 | 24 |
| 22 K08H10.1 | ESASEAADRLK   | 23 | 742  | 0.62 | 0.38 | 62 |
| 10 K08H10.1 | ASDIADSFK     | 44 | 1190 | 0.62 | 0.12 | 20 |
| 1 K08H10.1  | ASDIADSFK     | 36 | 1393 | 0.65 | 0.13 | 20 |
| 1 K08H10.1  | ISNAFTSLK     | 31 | 867  | 0.67 | 0.24 | 36 |
| 22 K08H10.1 | ISNAFTSLK     | 46 | 1533 | 0.67 | 0.23 | 35 |
| 22 K08H10.1 | ISNAFTSLK     | 31 | 1032 | 0.69 | 0.19 | 28 |
| 22 K08H10.1 | ASDIADSFK     | 38 | 1669 | 0.69 | 0.17 | 24 |
| 10 K08H10.1 | ISNAFTSLK     | 31 | 1061 | 0.74 | 0.17 | 23 |
| 10 K08H10.1 | ISNAFTSLK     | 31 | 683  | 0.75 | 0.24 | 32 |
| 22 K08H10.1 | VGDSISGAYDTVK | 31 | 1406 | 0.76 | 0.11 | 14 |
| 22 K08H10.1 | ISNAFTSLK     | 40 | 1091 | 0.77 | 0.17 | 22 |
| 7 K08H10.1  | ASDIADSFK     | 46 | 3283 | 0.77 | 0.20 | 26 |
| 1 K08H10.1  | ASDIADSFK     | 47 | 1715 | 0.78 | 0.12 | 15 |
| 1 K08H10.1  | VGDSISGAYDTVK | 29 | 1039 | 0.80 | 0.08 | 10 |
| 22 K08H10.1 | ASDIADSFK     | 50 | 2976 | 0.82 | 0.24 | 29 |
| 1 K08H10.1  | ASDIADSFK     | 40 | 1099 | 0.82 | 0.24 | 29 |
| 22 K08H10.1 | ASDIADSFK     | 29 | 3035 | 0.83 | 0.09 | 10 |
| 1 K08H10.1  | ISNAFTSLK     | 19 | 519  | 0.86 | 0.17 | 20 |
| 7 K08H10.1  | ISNAFTSLK     | 13 | 610  | 0.87 | 0.17 | 19 |
| 10 K08H10.1 | ISNAFTSLK     | 55 | 1603 | 0.87 | 0.15 | 17 |
| 1 K08H10.1  | ISNAFTSLK     | 52 | 1518 | 0.87 | 0.11 | 13 |
| 10 K08H10.1 | ASDIADSFK     | 26 | 1207 | 0.87 | 0.05 | 6  |
| 22 K08H10.1 | ASDIADSFK     | 50 | 2414 | 0.88 | 0.14 | 16 |
| 10 K08H10.1 | ASDIADSFK     | 57 | 2659 | 0.88 | 0.17 | 20 |
| 10 K08H10.1 | ISNAFTSLK     | 51 | 660  | 0.89 | 0.11 | 12 |
| 7 K08H10.1  | ASDIADSFK     | 30 | 1259 | 0.91 | 0.21 | 23 |
| 1 K08H10.1  | VSAAGDYASEAGK | 14 | 507  | 0.92 | 0.12 | 13 |
| 1 K08H10.1  | ISNAFTSLK     | 53 | 1845 | 0.92 | 0.07 | 8  |
| 10 K08H10.1 | ASDIADSFK     | 68 | 3805 | 0.93 | 0.17 | 18 |
| 7 K08H10.1  | ISNAFTSLK     | 17 | 790  | 0.93 | 0.15 | 16 |
| 10 K08H10.1 | ISNAFTSLK     | 36 | 1530 | 0.94 | 0.24 | 26 |
| 10 K08H10.1 | ISNAFTSLK     | 29 | 910  | 0.94 | 0.18 | 20 |
| 10 K08H10.1 | ISNAFTSLK     | 49 | 2053 | 0.95 | 0.08 | 8  |
| 10 K08H10.1 | ASDIADSFK     | 11 | 960  | 0.96 | 0.36 | 38 |
| 7 K08H10.1  | ASDIADSFK     | 59 | 2638 | 0.97 | 0.16 | 17 |
| 1 K08H10.1  | ISNAFTSLK     | 58 | 2727 | 0.98 | 0.11 | 11 |
| 1 K08H10.1  | ISNAFTSLK     | 34 | 588  | 0.99 | 0.07 | 7  |
| 10 K08H10.1 | ISNAFTSLK     | 55 | 1153 | 0.99 | 0.09 | 9  |
| 22 K08H10.1 | ASDIADSFK     | 63 | 4370 | 0.99 | 0.15 | 15 |
| 7 K08H10.1  | ASDIADSFK     | 22 | 1745 | 1.00 | 0.14 | 14 |
| 1 K08H10.1  | ISNAFTSLK     | 21 | 599  | 1.00 | 0.17 | 17 |
| 22 K08H10.1 | VGDSISGAYDTVK | 37 | 1166 | 1.00 | 0.11 | 11 |
| 22 K08H10.1 | ISNAFTSLK     | 35 | 1963 | 1.02 | 0.21 | 20 |
| 10 K08H10.1 | ISNAFTSLK     | 35 | 1015 | 1.03 | 0.17 | 16 |
| 7 K08H10.1  | ISNAFTSLK     | 22 | 1192 | 1.04 | 0.07 | 7  |
| 22 K08H10.1 | ISNAFTSLK     | 27 | 854  | 1.05 | 0.19 | 18 |
| 1 K08H10.1  | ASDIADSFK     | 40 | 1751 | 1.05 | 0.16 | 15 |
| 7 K08H10.1  | ASDIADSFK     | 58 | 3707 | 1.05 | 0.19 | 18 |
| 10 K08H10.1 | ISNAFTSLK     | 24 | 527  | 1.07 | 0.10 | 9  |
| 10 K08H10.1 | ASDIADSFK     | 35 | 2350 | 1.07 | 0.19 | 17 |
| 22 K08H10.1 | ASDIADSFK     | 68 | 4329 | 1.08 | 0.07 | 7  |
| 22 K08H10.1 | ASDVADSFK     | 38 | 2951 | 1.08 | 0.18 | 16 |
| 10 K08H10.1 | ISNAFTSLK     | 20 | 622  | 1.09 | 0.29 | 26 |
| 1 K08H10.1  | ISNAFTSLK     | 60 | 1785 | 1.17 | 0.14 | 12 |
| 1 K08H10.1  | ISNAFTSLK     | 55 | 1694 | 1.19 | 0.13 | 11 |
| 7 K08H10.1  | ASDIADSFK     | 49 | 2653 | 1.20 | 0.23 | 20 |
| 22 K08H10.1 | ASDIADSFK     | 55 | 2988 | 1.21 | 0.13 | 11 |
| 1 K08H10.1  | ISNAFTSLK     | 17 | 548  | 1.23 | 0.10 | 8  |
| 10 K08H10.1 | ISNAFTSLK     | 36 | 1212 | 1.24 | 0.24 | 20 |
| 1 K08H10.1  | ISNAFTSLK     | 55 | 829  | 1.24 | 0.16 | 13 |
| 22 K08H10.1 | ASDVADSFK     | 46 | 2849 | 1.25 | 0.21 | 17 |
| 7 K08H10.1  | ISNAFTSLK     | 52 | 2115 | 1.25 | 0.15 | 12 |
| 7 K08H10.1  | ASDIADSFK     | 30 | 1378 | 1.25 | 0.12 | 9  |
| 1 K08H10.1  | ASDIADSFK     | 20 | 751  | 1.26 | 0.20 | 16 |
| 10 K08H10.1 | ISNAFTSLK     | 32 | 1313 | 1.27 | 0.14 | 11 |
| 10 K08H10.1 | ISNAFTSLK     | 38 | 672  | 1.30 | 0.13 | 10 |
| 22 K08H10.1 | ASDIADSFK     | 54 | 3548 | 1.39 | 0.08 | 6  |
| 1 K08H10.1  | VGDSISGAYDTVK | 31 | 924  | 1.39 | 0.11 | 8  |
| 1 K08H10.1  | ISNAFTSLK     | 14 | 503  | 1.39 | 0.04 | 3  |
| 1 K08H10.1  | ISNAFTSLK     | 29 | 1257 | 1.40 | 0.21 | 15 |
| 10 K08H10.1 | ASDIADSFK     | 12 | 1619 | 1.42 | 0.21 | 15 |
| 22 K08H10.1 | ISNAFTSLK     | 40 | 1482 | 1.46 | 0.11 | 8  |
| 10 K08H10.1 | ISNAFTSLK     | 25 | 934  | 1.46 | 0.14 | 10 |
| 7 K08H10.1  | ISNAFTSLK     | 59 | 1695 | 1.48 | 0.10 | 6  |
| 1 K08H10.1  | ASDIADSFK     | 57 | 2480 | 1.50 | 0.15 | 10 |
| 10 K08H10.1 | ISNAFTSLK     | 36 | 1076 | 1.51 | 0.14 | 9  |
| 7 K08H10.1  | ASDIADSFK     | 47 | 2634 | 1.54 | 0.10 | 6  |
| 22 K08H10.1 | ISNAFTSLK     | 39 | 1636 | 1.56 | 0.08 | 5  |
| 1 K08H10.1  | ASDIADSFK     | 35 | 1226 | 1.64 | 0.12 | 7  |
| 1 K08H10.1  | ASDIADSFK     | 17 | 700  | 1.74 | 0.14 | 8  |
| 22 K08H10.1 | ASDIADSFK     | 18 | 1574 | 1.74 | 0.34 | 19 |
| 1 K08H10.1  | VGDSISGAYDTVK | 31 | 671  | 1.74 | 0.20 | 12 |
| 22 K08H10.1 | ISNAFTSLK     | 12 | 622  | 1.76 | 0.19 | 11 |
| 7 K08H10.1  | ISNAFTSLK     | 27 | 619  | 1.80 | 0.19 | 11 |
| 22 K08H10.1 | ASDIADSFK     | 17 | 1561 | 1.82 | 0.28 | 16 |
| 22 K08H10.1 | ASDIADSFK     | 29 | 1872 | 1.88 | 0.19 | 10 |
| 1 K08H10.1  | ISNAFTSLK     | 45 | 1453 | 2.05 | 0.22 | 11 |
| 1 K08H10.1  | ISNAFTSLK     | 49 | 1407 | 2.14 | 0.07 | 3  |
| 1 K08H10.1  | ISNAFTSLK     | 45 | 1795 | 2.14 | 0.17 | 8  |
| 10 K08H10.1 | ASDIADSFK     | 35 | 2380 | 2.15 | 0.39 | 18 |
| 1 K08H10.1  | ASDIADSFK     | 22 | 916  | 2.17 | 0.19 | 9  |
| 22 K08H10.1 | ISNAFTSLK     | 17 | 897  | 2.23 | 0.20 | 9  |
| 22 K08H10.1 | ASDIADSFK     | 14 | 1100 | 2.70 | 0.45 | 17 |
| 1 K08H10.1  | ISNAFTSLK     | 22 | 404  | 2.79 | 0.07 | 2  |
| 1 K08H10.1  | ISNAFTSLK     | 20 | 421  | 2.82 | 0.14 | 5  |
| 7 K08H10.1  | ISNAFTSLK     | 37 | 1938 | 2.88 | 0.17 | 6  |

|                       |                           |    |        |      |      |    |
|-----------------------|---------------------------|----|--------|------|------|----|
| 1 K08H10.1            | ASDIADSFK                 | 46 | 1149   | 2.89 | 0.17 | 6  |
| 7 K08H10.1            | ISNAFTSLK                 | 58 | 3014   | 2.95 | 0.08 | 3  |
| 10 K08H10.1           | ASDIADSFK                 | 22 | 1961   | 3.08 | 0.28 | 9  |
| 10 K08H10.2b          | TSDVFDSLK                 | 14 | 950    | 0.48 | 0.08 | 17 |
| 10 K08H10.2b          | TSDVFDSLK                 | 45 | 1736   | 0.62 | 0.17 | 28 |
| 10 K08H10.2b          | TSDVFDSLK                 | 28 | 891    | 0.69 | 0.21 | 30 |
| 22 K08H10.2b          | ESAQGYFEQAK               | 20 | 747    | 0.72 | 0.32 | 44 |
| 22 K08H10.2b          | HFDDAVDAAK                | 25 | 2564   | 0.72 | 0.11 | 15 |
| 10 K08H10.2b          | HFDDAVDAAK                | 38 | 3751   | 0.76 | 0.11 | 14 |
| 10 K08H10.2b          | HFDDAVDAAK                | 24 | 4038   | 0.82 | 0.09 | 11 |
| 10 K08H10.2b          | TSDVFDSLK                 | 20 | 558    | 0.90 | 0.16 | 18 |
| 22 K08H10.2b          | HFDDAVDAAK                | 44 | 7808   | 1.02 | 0.08 | 7  |
| 22 K08H10.2b          | HFDDAVDAAK                | 31 | 3012   | 1.12 | 0.09 | 8  |
| 10 K08H10.2b          | TSDVFDSLK                 | 36 | 1080   | 1.18 | 0.07 | 6  |
| 22 K08H10.2b          | HFDDAVDAAK                | 47 | 5807   | 1.21 | 0.13 | 10 |
| 22 K08H10.2b          | TSDVFDSLK                 | 17 | 934    | 1.79 | 0.14 | 8  |
| 22 K08H10.2b          | TSDVFDSLK                 | 14 | 1436   | 2.80 | 0.10 | 4  |
| 22 K08H10.2b          | HFDDAVDAAK                | 44 | 6098   | 3.10 | 0.23 | 8  |
| 22 K08H10.2b          | HFDDAVDAAK                | 22 | 4103   | 5.13 | 0.20 | 4  |
| 7 K08H10.2b;K08H10.2a | HFDDAVDAAK                | 23 | 2424   | 0.30 | 0.21 | 71 |
| 1 K08H10.2b;K08H10.2a | TSDVFDSLK                 | 19 | 531    | 0.77 | 0.09 | 12 |
| 1 K08H10.2b;K08H10.2a | TSDVFDSLK                 | 12 | 482    | 0.85 | 0.12 | 14 |
| 1 K08H10.2b;K08H10.2a | HFDDAVDAAK                | 24 | 1897   | 0.96 | 0.10 | 11 |
| 1 K08H10.2b;K08H10.2a | TSDVFDSLK                 | 11 | 714    | 0.99 | 0.11 | 11 |
| 1 K08H10.2b;K08H10.2a | SLTSDAGDAILGAYDAAK        | 66 | 1562   | 1.02 | 0.23 | 22 |
| 7 K08H10.2b;K08H10.2a | HFDDAVDAAK                | 29 | 1995   | 1.09 | 0.23 | 21 |
| 1 K08H10.2b;K08H10.2a | HFDDAVDAAK                | 33 | 2677   | 1.14 | 0.37 | 33 |
| 1 K08H10.2b;K08H10.2a | TSDVFDSLK                 | 28 | 712    | 1.18 | 0.23 | 19 |
| 1 K08H10.2b;K08H10.2a | ESAQGYFEQAK               | 55 | 1133   | 1.19 | 0.22 | 19 |
| 1 K08H10.2b;K08H10.2a | ESAQGYFEQAK               | 42 | 869    | 1.20 | 0.14 | 12 |
| 1 K08H10.2b;K08H10.2a | ESAQGYFEQAK               | 44 | 978    | 1.25 | 0.25 | 20 |
| 1 K08H10.2b;K08H10.2a | TSDVFDSLK                 | 28 | 884    | 1.41 | 0.13 | 9  |
| 1 K08H10.2b;K08H10.2a | SLTSDAGDAILGAYDAAK        | 69 | 1104   | 1.72 | 0.18 | 11 |
| 1 K08H10.2b;K08H10.2a | TSDVFDSLK                 | 33 | 736    | 1.84 | 0.16 | 9  |
| 1 K08H10.2b;K08H10.2a | HFDDAVDAAK                | 15 | 2579   | 2.31 | 0.36 | 16 |
| 1 K08H10.2b;K08H10.2a | HFDDAVDAAK                | 29 | 2822   | 2.33 | 0.09 | 4  |
| 10 K09E2.3            | LNLVELVAK                 | 41 | 1993   | 0.29 | 0.03 | 12 |
| 10 K09E2.3            | LNLVELVAK                 | 62 | 2169   | 0.33 | 0.14 | 43 |
| 22 K09E2.3            | LNLVELVAK                 | 67 | 2931   | 0.51 | 0.24 | 47 |
| 22 K09E2.3            | LNLVELVAK                 | 78 | 2792   | 0.55 | 0.27 | 48 |
| 7 K09E2.3             | NAVINVPEHTGTPLRIPIK       | 16 | 22692  | 0.89 | 0.16 | 18 |
| 22 K09E2.3            | NAVINVPEHTGTPLRIPIK       | 50 | 26296  | 0.93 | 0.20 | 21 |
| 1 K09E2.3             | NAVINVPEHTGTPLRIPIK       | 12 | 5296   | 1.06 | 0.11 | 11 |
| 10 K09E2.3            | NAVINVPEHTGTPLRIPIK       | 35 | 26023  | 1.10 | 0.20 | 18 |
| 22 K09E2.3            | LNLVELVAK                 | 21 | 533    | 1.11 | 0.28 | 25 |
| 22 K09E2.3            | NAVINVPEHTGTPLRIPIK       | 44 | 27352  | 1.58 | 0.14 | 9  |
| 10 K09E2.3            | NAVINVPEHTGTPLRIPIK       | 27 | 22171  | 1.63 | 0.16 | 10 |
| 1 K09E2.3             | NAVINVPEHTGTPLRIPIK       | 12 | 4360   | 1.69 | 0.11 | 7  |
| 7 K09E2.3             | LNLVELVAK                 | 45 | 1198   | 1.97 | 0.23 | 12 |
| 10 K09F5.2            | IQAVVGMK                  | 30 | 1155   | 0.46 | 0.26 | 56 |
| 1 K09F5.2             | DIEEFHRSYLLK              | 12 | 3721   | 0.60 | 0.35 | 58 |
| 10 K09F5.2            | ESTTVVRGRRIQTGITLLK       | 10 | 1855   | 0.63 | 0.23 | 36 |
| 10 K09F5.2            | IQAVVGMK                  | 35 | 1381   | 0.63 | 0.09 | 13 |
| 10 K09F5.2            | DMDYAILPVDQLIEK           | 31 | 1373   | 0.64 | 0.08 | 12 |
| 10 K09F5.2            | IQAVVGMK                  | 52 | 2193   | 0.74 | 0.13 | 17 |
| 10 K09F5.2            | IQAVVGMK                  | 12 | 877    | 0.78 | 0.09 | 12 |
| 22 K09F5.2            | IQAVVGMK                  | 23 | 1510   | 0.92 | 0.37 | 41 |
| 10 K09F5.2            | IQAVVGMK                  | 37 | 1899   | 1.01 | 0.12 | 12 |
| 10 K09F5.2            | IQAVVGMK                  | 26 | 1670   | 1.02 | 0.15 | 15 |
| 10 K09F5.2            | DMDYAILPVDQLIEK           | 14 | 1027   | 1.02 | 0.11 | 11 |
| 10 K09F5.2            | IQAVVGMK                  | 21 | 2555   | 1.09 | 0.17 | 15 |
| 10 K09F5.2            | FAESRVSK                  | 13 | 2188   | 1.13 | 0.16 | 14 |
| 10 K09F5.2            | IQAVVGMK                  | 43 | 1720   | 1.19 | 0.13 | 11 |
| 22 K09F5.2            | IQAVVGMK                  | 23 | 1249   | 1.62 | 0.29 | 18 |
| 10 K09F5.2            | RQLLPVRK                  | 17 | 1464   | 1.85 | 0.07 | 4  |
| 10 K09F5.2            | RQLLPVRK                  | 14 | 5858   | 2.58 | 0.13 | 5  |
| 10 K10B3.10           | AVIGADELAK                | 15 | 662    | 0.47 | 0.13 | 27 |
| 10 K10B3.10           | AVIGADELAK                | 26 | 645    | 0.53 | 0.14 | 27 |
| 22 K10B3.10           | AVIGADELAK                | 30 | 1007   | 0.69 | 0.21 | 30 |
| 22 K10B3.10           | AVIGADELAK                | 32 | 789    | 0.78 | 0.29 | 37 |
| 10 K10B3.10           | HRALLSDLEAFK              | 16 | 1801   | 0.99 | 0.18 | 18 |
| 22 K10B3.10           | GTIEDLRK                  | 12 | 855    | 1.14 | 0.15 | 13 |
| 10 K10B3.10           | HRALLSDLEAFK              | 30 | 2317   | 1.17 | 0.11 | 9  |
| 22 K10B3.10           | HEAFEAEVQAHAK             | 21 | 1040   | 1.47 | 0.18 | 12 |
| 7 K10B3.10            | HINFEQELK                 | 33 | 758    | 1.93 | 0.12 | 6  |
| 10 K10B3.10           | HINFEQELK                 | 13 | 1519   | 2.10 | 0.22 | 10 |
| 22 K10B3.10           | HINFEQELK                 | 20 | 865    | 2.18 | 0.13 | 6  |
| 1 K10B3.10            | HINFEQELK                 | 24 | 478    | 2.46 | 0.24 | 10 |
| 7 K10B3.10            | HINFEQELK                 | 31 | 966    | 2.65 | 0.16 | 6  |
| 22 K10B3.10           | HRALLSDLEAFK              | 23 | 1171   | 4.05 | 0.11 | 3  |
| 7 K10B3.7;K10B3.8     | GTVAHEGDYLLVAK            | 41 | 2396   | 0.54 | 0.16 | 30 |
| 22 K10B3.7;K10B3.8    | YDHANDHIISNASCCTTNCLAPLAK | 51 | 12810  | 0.59 | 0.13 | 22 |
| 22 K10B3.7;K10B3.8    | GTVAHEGDYLLVAK            | 21 | 45366  | 0.64 | 0.13 | 20 |
| 7 K10B3.7;K10B3.8     | GTVAHEGDYLLVAK            | 45 | 37158  | 0.73 | 0.15 | 20 |
| 22 K10B3.7;K10B3.8    | GTVAHEGDYLLVAK            | 94 | 43059  | 0.73 | 0.11 | 15 |
| 22 K10B3.7;K10B3.8    | VIISAPSADAPMFVVGVNHEK     | 74 | 3887   | 0.75 | 0.13 | 17 |
| 7 K10B3.7;K10B3.8     | GTVAHEGDYLLVAK            | 76 | 4158   | 0.82 | 0.11 | 14 |
| 7 K10B3.7;K10B3.8     | GTVAHEGDYLLVAK            | 34 | 2356   | 0.82 | 0.07 | 8  |
| 7 K10B3.7;K10B3.8     | GTVAHEGDYLLVAK            | 57 | 3480   | 0.83 | 0.13 | 16 |
| 7 K10B3.7;K10B3.8     | GTVAHEGDYLLVAK            | 83 | 636354 | 0.84 | 0.09 | 11 |
| 7 K10B3.7;K10B3.8     | GTVAHEGDYLLVAK            | 92 | 15487  | 0.84 | 0.06 | 7  |
| 7 K10B3.7;K10B3.8     | GTVAHEGDYLLVAK            | 86 | 13326  | 0.85 | 0.11 | 12 |
| 22 K10B3.7;K10B3.8    | GTVAHEGDYLLVAK            | 84 | 38889  | 0.85 | 0.07 | 8  |
| 7 K10B3.7;K10B3.8     | GTVAHEGDYLLVAK            | 85 | 581416 | 0.85 | 0.09 | 10 |
| 22 K10B3.7;K10B3.8    | VIISAPSADAPMFVVGVNHEK     | 49 | 4539   | 0.87 | 0.27 | 31 |
| 1 K10B3.7;K10B3.8     | GTVAHEGDYLLVAK            | 79 | 2435   | 0.87 | 0.46 | 52 |
| 10 K10B3.7;K10B3.8    | GTVAHEGDYLLVAK            | 39 | 1740   | 0.88 | 0.14 | 16 |
| 22 K10B3.7;K10B3.8    | GTVAHEGDYLLVAK            | 70 | 8255   | 0.88 | 0.09 | 10 |
| 7 K10B3.7;K10B3.8     | GTVAHEGDYLLVAK            | 65 | 8176   | 0.89 | 0.12 | 13 |
| 22 K10B3.7;K10B3.8    | GTVAHEGDYLLVAK            | 94 | 5694   | 0.89 | 0.13 | 14 |
| 7 K10B3.7;K10B3.8     | GTVAHEGDYLLVAK            | 49 | 3271   | 0.92 | 0.13 | 15 |

|                                                                   |                                 |     |        |      |      |     |
|-------------------------------------------------------------------|---------------------------------|-----|--------|------|------|-----|
| 22 K10B3.7;K10B3.8                                                | GTVAHEGDYLLVAK                  | 39  | 2566   | 0.92 | 0.10 | 10  |
| 22 K10B3.7;K10B3.8                                                | GTVAHEGDYLLVAK                  | 57  | 3080   | 0.92 | 0.22 | 24  |
| 7 K10B3.7;K10B3.8                                                 | GTVAHEGDYLLVAK                  | 70  | 6734   | 0.94 | 0.12 | 13  |
| 7 K10B3.7;K10B3.8                                                 | GTVAHEGDYLLVAK                  | 56  | 125446 | 0.94 | 0.10 | 11  |
| 22 K10B3.7;K10B3.8                                                | GTVAHEGDYLLVAK                  | 109 | 807908 | 0.95 | 0.10 | 11  |
| 22 K10B3.7;K10B3.8                                                | GTVAHEGDYLLVAK                  | 87  | 5590   | 0.95 | 0.10 | 10  |
| 22 K10B3.7;K10B3.8                                                | GTVAHEGDYLLVAK                  | 103 | 5423   | 0.95 | 0.12 | 13  |
| 7 K10B3.7;K10B3.8                                                 | GTVAHEGDYLLVAK                  | 93  | 9653   | 0.96 | 0.07 | 7   |
| 10 K10B3.7;K10B3.8                                                | VIISAPSADAPMFVVGVNHEK           | 13  | 7124   | 0.97 | 0.17 | 17  |
| 10 K10B3.7;K10B3.8                                                | GTVAHEGDYLLVAK                  | 91  | 723589 | 0.98 | 0.09 | 9   |
| 7 K10B3.7;K10B3.8                                                 | GTVAHEGDYLLVAK                  | 93  | 8242   | 0.98 | 0.08 | 9   |
| 7 K10B3.7;K10B3.8                                                 | YDHANDHIISNASCTTNCLAPLAK        | 54  | 8915   | 0.98 | 0.15 | 15  |
| 10 K10B3.7;K10B3.8                                                | GTVAHEGDYLLVAK                  | 37  | 974    | 0.98 | 0.14 | 15  |
| 7 K10B3.7;K10B3.8                                                 | GTVAHEGDYLLVAK                  | 85  | 10313  | 1.00 | 0.09 | 9   |
| 7 K10B3.7;K10B3.8                                                 | GTVAHEGDYLLVAK                  | 71  | 6298   | 1.00 | 0.09 | 9   |
| 22 K10B3.7;K10B3.8                                                | GTVAHEGDYLLVAK                  | 95  | 747825 | 1.00 | 0.09 | 9   |
| 10 K10B3.7;K10B3.8                                                | GTVAHEGDYLLVAK                  | 15  | 1247   | 1.01 | 0.23 | 22  |
| 10 K10B3.7;K10B3.8                                                | GTVAHEGDYLLVAK                  | 43  | 3248   | 1.01 | 0.12 | 11  |
| 7 K10B3.7;K10B3.8                                                 | GTVAHEGDYLLVAK                  | 28  | 4168   | 1.01 | 0.09 | 9   |
| 22 K10B3.7;K10B3.8                                                | GTVAHEGDYLLVAK                  | 62  | 8192   | 1.02 | 0.14 | 14  |
| 10 K10B3.7;K10B3.8                                                | GTVAHEGDYLLVAK                  | 98  | 710823 | 1.02 | 0.12 | 11  |
| 10 K10B3.7;K10B3.8                                                | GTVAHEGDYLLVAK                  | 90  | 20626  | 1.03 | 0.06 | 6   |
| 10 K10B3.7;K10B3.8                                                | GTVAHEGDYLLVAK                  | 69  | 5386   | 1.04 | 0.13 | 13  |
| 10 K10B3.7;K10B3.8                                                | GTVAHEGDYLLVAK                  | 82  | 19473  | 1.04 | 0.07 | 6   |
| 10 K10B3.7;K10B3.8                                                | GTVAHEGDYLLVAK                  | 16  | 1229   | 1.04 | 0.10 | 10  |
| 22 K10B3.7;K10B3.8                                                | GTVAHEGDYLLVAK                  | 81  | 5161   | 1.05 | 0.10 | 9   |
| 7 K10B3.7;K10B3.8                                                 | YDHANDHIISNASCTTNCLAPLAK        | 59  | 17077  | 1.06 | 0.10 | 10  |
| 10 K10B3.7;K10B3.8                                                | GTVAHEGDYLLVAK                  | 23  | 2651   | 1.10 | 0.10 | 9   |
| 1 K10B3.7;K10B3.8                                                 | GTVAHEGDYLLVAK                  | 32  | 2782   | 1.10 | 0.09 | 8   |
| 22 K10B3.7;K10B3.8                                                | GTVAHEGDYLLVAK                  | 39  | 1670   | 1.10 | 0.13 | 12  |
| 1 K10B3.7;K10B3.8                                                 | GTVAHEGDYLLVAK                  | 60  | 1461   | 1.11 | 0.09 | 8   |
| 10 K10B3.7;K10B3.8                                                | GTVAHEGDYLLVAK                  | 59  | 1840   | 1.12 | 0.14 | 12  |
| 22 K10B3.7;K10B3.8                                                | GTVAHEGDYLLVAK                  | 46  | 2667   | 1.12 | 0.07 | 6   |
| 10 K10B3.7;K10B3.8                                                | GTVAHEGDYLLVAK                  | 67  | 4723   | 1.15 | 0.15 | 13  |
| 7 K10B3.7;K10B3.8                                                 | VIISAPSADAPMFVVGVNHEK           | 47  | 1832   | 1.17 | 0.21 | 18  |
| 7 K10B3.7;K10B3.8                                                 | GTVAHEGDYLLVAK                  | 78  | 8366   | 1.19 | 0.15 | 13  |
| 10 K10B3.7;K10B3.8                                                | GTVAHEGDYLLVAK                  | 91  | 5741   | 1.20 | 0.11 | 9   |
| 10 K10B3.7;K10B3.8                                                | GTVAHEGDYLLVAK                  | 61  | 4705   | 1.21 | 0.07 | 6   |
| 10 K10B3.7;K10B3.8                                                | GTVAHEGDYLLVAK                  | 23  | 2434   | 1.22 | 0.07 | 6   |
| 1 K10B3.7;K10B3.8                                                 | GTVAHEGDYLLVAK                  | 43  | 2794   | 1.24 | 0.10 | 8   |
| 10 K10B3.7;K10B3.8                                                | GTVAHEGDYLLVAK                  | 57  | 6971   | 1.25 | 0.11 | 9   |
| 7 K10B3.7;K10B3.8                                                 | GTVAHEGDYLLVAK                  | 16  | 7827   | 1.28 | 0.10 | 8   |
| 10 K10B3.7;K10B3.8                                                | GTVAHEGDYLLVAK                  | 64  | 7697   | 1.29 | 0.10 | 8   |
| 1 K10B3.7;K10B3.8                                                 | GTVAHEGDYLLVAK                  | 51  | 1424   | 1.32 | 0.16 | 12  |
| 7 K10B3.7;K10B3.8                                                 | GTVAHEGDYLLVAK                  | 63  | 12776  | 1.35 | 0.09 | 7   |
| 22 K10B3.7;K10B3.8                                                | GTVAHEGDYLLVAK                  | 13  | 1662   | 1.36 | 0.17 | 12  |
| 1 K10B3.7;K10B3.8                                                 | GTVAHEGDYLLVAK                  | 66  | 2674   | 1.38 | 0.16 | 11  |
| 10 K10B3.7;K10B3.8                                                | GTVAHEGDYLLVAK                  | 40  | 2046   | 1.39 | 0.09 | 7   |
| 10 K10B3.7;K10B3.8                                                | GTVAHEGDYLLVAK                  | 18  | 1926   | 1.46 | 0.16 | 11  |
| 22 K10B3.7;K10B3.8                                                | GTVAHEGDYLLVAK                  | 41  | 18437  | 1.50 | 0.11 | 8   |
| 22 K10B3.7;K10B3.8                                                | GTVAHEGDYLLVAK                  | 35  | 11645  | 1.59 | 0.11 | 7   |
| 7 K10B3.7;K10B3.8                                                 | GTVAHEGDYLLVAK                  | 44  | 26302  | 1.61 | 0.18 | 11  |
| 7 K10B3.7;K10B3.8                                                 | VIISAPSADAPMFVVGVNHEK           | 16  | 5514   | 1.61 | 0.11 | 7   |
| 10 K10B3.7;K10B3.8                                                | GTVAHEGDYLLVAK                  | 68  | 8553   | 1.68 | 0.08 | 5   |
| 22 K10B3.7;K10B3.8                                                | GTVAHEGDYLLVAK                  | 81  | 13531  | 1.99 | 0.07 | 4   |
| 10 K10B3.7;K10B3.8                                                | GTVAHEGDYLLVAK                  | 73  | 5666   | 2.04 | 0.07 | 3   |
| 10 K10B3.7;K10B3.8                                                | GTVAHEGDYLLVAK                  | 67  | 10604  | 2.08 | 0.11 | 5   |
| 7 K10B3.7;K10B3.8                                                 | GTVAHEGDYLLVAK                  | 40  | 2352   | 2.12 | 0.11 | 5   |
| 22 K10B3.7;K10B3.8                                                | GTVAHEGDYLLVAK                  | 73  | 9334   | 2.20 | 0.09 | 4   |
| 1 K10B3.7;K10B3.8                                                 | GTVAHEGDYLLVAK                  | 79  | 4970   | 2.28 | 0.15 | 7   |
| 7 K10B3.7;K10B3.8                                                 | GTVAHEGDYLLVAK                  | 69  | 4926   | 2.28 | 0.09 | 4   |
| 22 K10B3.7;K10B3.8                                                | VYNSRDPAEIQWGASGADYVVSTGVFTTIEK | 34  | 2186   | 3.20 | 0.15 | 5   |
| 1 K10C2.4                                                         | APDAEVPSFGPSK                   | 18  | 3626   | 0.57 | 0.18 | 31  |
| 1 K10C2.4                                                         | APDAEVPSFGPSK                   | 14  | 3044   | 0.60 | 0.27 | 45  |
| 1 K10C2.4                                                         | EVPGVSEIRK                      | 15  | 8414   | 0.62 | 0.22 | 36  |
| 22 K10C2.4                                                        | HLYWTLK                         | 26  | 12861  | 0.65 | 0.12 | 19  |
| 22 K10C2.4                                                        | EVPGVSEIRK                      | 36  | 32419  | 0.75 | 0.36 | 47  |
| 1 K10C2.4                                                         | EVPGVSEIRK                      | 37  | 21248  | 0.93 | 0.27 | 29  |
| 7 K10C2.4                                                         | HLYWTLK                         | 32  | 5935   | 1.60 | 0.10 | 6   |
| 1 K10C2.4                                                         | HLYWTLK                         | 41  | 3856   | 2.02 | 0.07 | 3   |
| 1 K10C2.4                                                         | HLYWTLK                         | 35  | 3023   | 2.09 | 0.08 | 4   |
| 10 K10C2.4                                                        | HLYWTLK                         | 25  | 4911   | 4.02 | 0.08 | 2   |
| 10 K10C9.3                                                        | VFDSIDVAGGLK                    | 27  | 1398   | 0.50 | 0.22 | 44  |
| 1 K10C9.3                                                         | VFDSIDVAGGLK                    | 39  | 804    | 0.73 | 0.12 | 16  |
| 10 K10H10.2                                                       | QLNLDDSIK                       | 39  | 6472   | 0.18 | 0.35 | 190 |
| 10 K10H10.2                                                       | AYGAEVILDPATAVK                 | 27  | 782    | 0.24 | 0.14 | 59  |
| 10 K10H10.2                                                       | QLNLDDSIK                       | 29  | 5365   | 0.25 | 0.42 | 165 |
| 22 K10H10.2                                                       | AYGAEVILDPATAVK                 | 16  | 649    | 0.46 | 0.19 | 41  |
| 7 K10H10.2                                                        | QLNLDDSIK                       | 21  | 6339   | 0.49 | 0.06 | 13  |
| 7 K10H10.2                                                        | QLNLDDSIK                       | 17  | 8392   | 0.58 | 0.18 | 32  |
| 10 K10H10.2                                                       | QLNLDDSIK                       | 29  | 5191   | 0.95 | 0.07 | 7   |
| 7 K10H10.2                                                        | AYGAEVILDPATAVK                 | 11  | 1105   | 0.97 | 0.20 | 21  |
| 10 K10H10.2                                                       | AYGAEVILDPATAVK                 | 34  | 1129   | 1.02 | 0.12 | 12  |
| 7 K10H10.2                                                        | DRIAFNMIDTAEK                   | 12  | 3199   | 1.05 | 0.20 | 19  |
| 10 K10H10.2                                                       | AYGAEVILDPATAVK                 | 59  | 2284   | 1.17 | 0.12 | 10  |
| 10 K10H10.2                                                       | DRIAFNMIDTAEK                   | 23  | 3085   | 1.17 | 0.18 | 16  |
| 10 K10H10.2                                                       | TTGPEIWRQTQ GK                  | 33  | 1478   | 1.29 | 0.09 | 7   |
| 7 K10H10.2                                                        | DRIAFNMIDTAEK                   | 53  | 4524   | 1.31 | 0.09 | 7   |
| 10 K10H10.2                                                       | AYGAEVILDPATAVK                 | 29  | 2048   | 1.42 | 0.19 | 14  |
| 10 K10H10.2                                                       | AYGAEVILDPATAVK                 | 40  | 1674   | 1.73 | 0.14 | 8   |
| 10 K10H10.2                                                       | AYGAEVILDPATAVK                 | 34  | 1299   | 1.94 | 0.17 | 9   |
| 22 K11B4.1                                                        | LSDIILEHLK                      | 41  | 2275   | 0.49 | 0.18 | 37  |
| 22 K11B4.1                                                        | LSDIILEHLK                      | 43  | 2997   | 0.73 | 0.09 | 12  |
| 22 K11B4.1                                                        | LSDIILEHLK                      | 46  | 1180   | 0.75 | 0.13 | 18  |
| 22 K11B4.1                                                        | LSDIILEHLK                      | 35  | 2722   | 0.89 | 0.17 | 20  |
| 22 K11B4.1                                                        | SSLNALGAVLFEK                   | 60  | 2449   | 0.94 | 0.10 | 11  |
| 22 K11B4.1                                                        | SSLNALGAVLFEK                   | 78  | 2484   | 0.98 | 0.15 | 15  |
| 22 K11B4.1                                                        | SSLNALGAVLFEK                   | 65  | 2228   | 1.23 | 0.12 | 10  |
| 22 K11B4.1                                                        | SSLNALGAVLFEK                   | 54  | 1524   | 1.34 | 0.12 | 9   |
| 22 K11C4.3b;K11C4.3a;K11C4.3c                                     | FVRHQAFQSELAANK                 | 21  | 1373   | 0.96 | 0.22 | 23  |
| 22 K11E8.1c;K11E8.1h;K11E8.1e;K11E8.1f;K11E8.1k;K11E8.1l;K11E8.1b | TTGLEFAAK                       | 28  | 849    | 0.96 | 0.13 | 14  |

|                                                                   |                         |     |       |      |      |     |
|-------------------------------------------------------------------|-------------------------|-----|-------|------|------|-----|
| 22 K11E8.1c;K11E8.1h;K11E8.1e;K11E8.1f;K11E8.1k;K11E8.1l;K11E8.1b | TTGLEFAAK               | 27  | 1121  | 1.22 | 0.21 | 17  |
| 1 K11G12.1a                                                       | SALYFEGNLIK             | 16  | 409   | 0.62 | 0.10 | 16  |
| 22 K11H12.2                                                       | FYEVVLIIDPFHK           | 37  | 1972  | 0.57 | 0.07 | 11  |
| 22 K11H12.2                                                       | FYEVVLIIDPFHK           | 45  | 1848  | 2.12 | 0.14 | 7   |
| 22 K11H12.2                                                       | FYEVVLIIDPFHK           | 42  | 1447  | 2.26 | 0.08 | 3   |
| 1 K11H3.1a;K11H3.1b;K11H3.1d                                      | FPLFTAVHK               | 30  | 4287  | 0.62 | 0.12 | 20  |
| 1 K11H3.1a;K11H3.1b;K11H3.1d                                      | FPLFTAVHK               | 44  | 3826  | 0.72 | 0.18 | 25  |
| 22 K11H3.1a;K11H3.1b;K11H3.1d                                     | IPADTQAISLIK            | 24  | 1910  | 0.88 | 0.19 | 22  |
| 22 K11H3.1a;K11H3.1b;K11H3.1d                                     | AAVIRLGLMETTK           | 21  | 1208  | 0.99 | 0.32 | 33  |
| 22 K11H3.1a;K11H3.1b;K11H3.1d                                     | AAVIRLGLMETTK           | 29  | 1609  | 1.01 | 0.35 | 35  |
| 22 K11H3.1a;K11H3.1b;K11H3.1d                                     | IPADTQAISLIK            | 21  | 2098  | 1.47 | 0.20 | 14  |
| 22 K11H3.1a;K11H3.1b;K11H3.1d                                     | LSEVINNRHENIK           | 10  | 12482 | 1.61 | 0.18 | 11  |
| 22 K11H3.1a;K11H3.1b;K11H3.1d                                     | FPLFTAVHK               | 12  | 1385  | 1.66 | 0.04 | 2   |
| 22 K11H3.1a;K11H3.1b;K11H3.1d                                     | AAVIRLGLMETTK           | 17  | 420   | 1.76 | 0.07 | 4   |
| 7 K11H3.1b;K11H3.1d                                               | FPLFTAVHK               | 41  | 8449  | 0.56 | 0.16 | 29  |
| 7 K11H3.1b;K11H3.1d                                               | AAVIRLGLMETTK           | 22  | 651   | 1.02 | 0.19 | 18  |
| 7 K11H3.1b;K11H3.1d                                               | AAVIRLGLMETTK           | 18  | 556   | 1.03 | 0.20 | 19  |
| 7 K11H3.1b;K11H3.1d                                               | LSEVINNRHENIK           | 10  | 4638  | 1.05 | 0.22 | 21  |
| 7 K11H3.1b;K11H3.1d                                               | IPADTQAISLIK            | 23  | 4134  | 1.28 | 0.12 | 10  |
| 10 K11H3.1b;K11H3.1d;K11H3.1a                                     | FPLFTAVHK               | 37  | 8872  | 1.02 | 0.20 | 20  |
| 10 K11H3.1b;K11H3.1d;K11H3.1a                                     | AAVIRLGLMETTK           | 11  | 602   | 1.59 | 0.16 | 10  |
| 7 K12C11.1                                                        | INNEQFFK                | 40  | 7777  | 0.47 | 0.07 | 15  |
| 10 K12C11.1                                                       | VILEHLK                 | 44  | 20101 | 0.48 | 0.12 | 25  |
| 10 K12C11.1                                                       | YAVDEVVFNDK             | 38  | 2835  | 0.53 | 0.11 | 21  |
| 7 K12C11.1                                                        | VPANSVLLQGGVEK          | 26  | 4424  | 0.55 | 0.15 | 28  |
| 7 K12C11.1                                                        | VIESRVSDFLSK            | 13  | 5209  | 0.56 | 0.15 | 26  |
| 7 K12C11.1                                                        | VILEHLK                 | 51  | 17269 | 0.57 | 0.19 | 33  |
| 7 K12C11.1                                                        | VILEHLK                 | 57  | 22557 | 0.58 | 0.10 | 18  |
| 10 K12C11.1                                                       | VILEHLK                 | 46  | 18165 | 0.62 | 0.12 | 19  |
| 1 K12C11.1                                                        | VIESRVSDFLSK            | 24  | 6979  | 0.64 | 0.11 | 17  |
| 7 K12C11.1                                                        | VIESRVSDFLSK            | 32  | 5998  | 0.65 | 0.14 | 22  |
| 7 K12C11.1                                                        | YAVDEVVFNDK             | 35  | 2305  | 0.65 | 0.11 | 16  |
| 10 K12C11.1                                                       | YAVDEVVFNDK             | 14  | 1202  | 0.66 | 0.11 | 17  |
| 10 K12C11.1                                                       | YAVDEVVFNDK             | 14  | 1013  | 0.67 | 0.16 | 23  |
| 1 K12C11.1                                                        | VIESRVSDFLSK            | 37  | 6667  | 0.69 | 0.16 | 23  |
| 7 K12C11.1                                                        | INNEQFFK                | 28  | 9200  | 0.72 | 0.15 | 20  |
| 10 K12C11.1                                                       | VPANSVLLQGGVEK          | 14  | 4860  | 0.75 | 0.10 | 13  |
| 1 K12C11.1                                                        | QAGLIVGDIDK             | 21  | 1786  | 0.75 | 0.08 | 10  |
| 7 K12C11.1                                                        | VPANSVLLQGGVEK          | 27  | 3679  | 0.76 | 0.14 | 18  |
| 1 K12C11.1                                                        | YAVDEVVFNDK             | 51  | 2537  | 0.77 | 0.16 | 20  |
| 22 K12C11.1                                                       | VILEHLK                 | 15  | 1536  | 0.77 | 0.15 | 20  |
| 22 K12C11.1                                                       | VILEHLK                 | 56  | 26343 | 0.77 | 0.08 | 10  |
| 10 K12C11.1                                                       | VIESRVSDFLSK            | 29  | 11568 | 0.78 | 0.11 | 15  |
| 1 K12C11.1                                                        | QAGLIVGDIDK             | 50  | 1747  | 0.79 | 0.20 | 26  |
| 1 K12C11.1                                                        | QAGLIVGDIDK             | 47  | 2073  | 0.79 | 0.09 | 12  |
| 22 K12C11.1                                                       | VILEHLK                 | 53  | 30232 | 0.83 | 0.06 | 7   |
| 1 K12C11.1                                                        | QAGLIVGDIDK             | 15  | 1164  | 0.85 | 0.18 | 22  |
| 7 K12C11.1                                                        | VPANSVLLQGGVEK          | 25  | 3972  | 0.85 | 0.12 | 14  |
| 22 K12C11.1                                                       | VPANSVLLQGGVEK          | 58  | 6225  | 0.86 | 0.14 | 16  |
| 10 K12C11.1                                                       | VILEHLK                 | 36  | 25117 | 0.87 | 0.05 | 6   |
| 22 K12C11.1                                                       | VILEHLK                 | 22  | 2147  | 0.89 | 0.17 | 19  |
| 1 K12C11.1                                                        | QAGLIVGDIDK             | 17  | 2207  | 0.90 | 0.10 | 11  |
| 22 K12C11.1                                                       | VPANSVLLQGGVEK          | 39  | 5686  | 0.91 | 0.09 | 10  |
| 10 K12C11.1                                                       | VPANSVLLQGGVEK          | 60  | 11861 | 0.94 | 0.15 | 16  |
| 7 K12C11.1                                                        | VPANSVLLQGGVEK          | 31  | 3983  | 0.94 | 0.17 | 19  |
| 7 K12C11.1                                                        | YAVDEVVFNDK             | 29  | 1338  | 0.99 | 0.11 | 11  |
| 22 K12C11.1                                                       | INNEQFFK                | 12  | 2127  | 1.04 | 0.15 | 15  |
| 7 K12C11.1                                                        | VILEHLK                 | 41  | 6441  | 1.06 | 0.08 | 7   |
| 22 K12C11.1                                                       | VILEHLK                 | 43  | 14003 | 1.09 | 0.06 | 5   |
| 10 K12C11.1                                                       | VIESRVSDFLSK            | 16  | 7615  | 1.09 | 0.09 | 8   |
| 10 K12C11.1                                                       | VILEHLK                 | 40  | 18587 | 1.11 | 0.07 | 6   |
| 1 K12C11.1                                                        | VILEHLK                 | 44  | 10860 | 1.17 | 0.07 | 6   |
| 22 K12C11.1                                                       | VILEHLK                 | 41  | 14814 | 1.17 | 0.05 | 4   |
| 22 K12C11.1                                                       | INNEQFFK                | 13  | 4030  | 1.22 | 0.12 | 10  |
| 7 K12C11.1                                                        | IASEAHRAAMK             | 13  | 7422  | 1.23 | 0.16 | 13  |
| 22 K12C11.1                                                       | INNEQFFK                | 12  | 2064  | 1.23 | 0.16 | 13  |
| 7 K12C11.1                                                        | VIESRVSDFLSK            | 20  | 4215  | 1.26 | 0.14 | 11  |
| 7 K12C11.1                                                        | VILEHLK                 | 27  | 11444 | 1.27 | 0.12 | 10  |
| 1 K12C11.1                                                        | VILEHLK                 | 21  | 3557  | 1.28 | 0.08 | 6   |
| 1 K12C11.1                                                        | VILEHLK                 | 45  | 10112 | 1.32 | 0.07 | 5   |
| 7 K12C11.1                                                        | VILEHLK                 | 22  | 6607  | 1.42 | 0.11 | 8   |
| 10 K12C11.1                                                       | VILEHLK                 | 12  | 1516  | 1.44 | 0.05 | 3   |
| 22 K12C11.1                                                       | VILEHLK                 | 35  | 11487 | 1.70 | 0.07 | 4   |
| 10 K12C11.1                                                       | VILEHLK                 | 43  | 5380  | 1.77 | 0.13 | 7   |
| 1 K12C11.1                                                        | VILEHLK                 | 28  | 4582  | 1.78 | 0.14 | 8   |
| 7 K12C11.1                                                        | HVYLLRAENTDSGDVLAEPK    | 20  | 7604  | 1.85 | 0.20 | 11  |
| 10 K12C11.1                                                       | VILEHLK                 | 32  | 6313  | 1.98 | 0.08 | 4   |
| 10 K12F2.1                                                        | HVQDLELSLRK             | 11  | 1282  | 1.04 | 0.17 | 17  |
| 22 K12G11.3                                                       | RGTVVVFGLPK             | 51  | 5625  | 0.25 | 0.39 | 159 |
| 22 K12G11.3                                                       | RGTVVVFGLPK             | 46  | 6570  | 0.38 | 0.52 | 138 |
| 22 K12G11.3                                                       | GSIVGSRLDVDEAMEFVTRGIVK | 16  | 1130  | 0.53 | 0.07 | 13  |
| 22 K12G11.3                                                       | RGTVVVFGLPK             | 26  | 9402  | 0.58 | 0.08 | 14  |
| 22 K12G11.3                                                       | RGTVVVFGLPK             | 31  | 9299  | 0.58 | 0.13 | 23  |
| 22 K12G11.3                                                       | GSIVGSRLDVDEAMEFVTRGIVK | 14  | 823   | 0.80 | 0.22 | 27  |
| 22 K12G11.3                                                       | VPLELVK                 | 14  | 3985  | 1.07 | 0.13 | 12  |
| 10 K12G11.3                                                       | RGTVVVFGLPK             | 12  | 2046  | 1.13 | 0.07 | 6   |
| 7 K12G11.3                                                        | RGTVVVFGLPK             | 31  | 2055  | 1.40 | 0.23 | 17  |
| 22 K12G11.3                                                       | NVTGWQLGDK              | 29  | 1291  | 1.41 | 0.10 | 7   |
| 10 K12G11.3                                                       | VPLELVK                 | 19  | 7473  | 1.56 | 0.17 | 11  |
| 10 K12G11.3                                                       | NVTGWQLGDK              | 36  | 1536  | 1.69 | 0.16 | 9   |
| 7 K12G11.3                                                        | RGTVVVFGLPK             | 39  | 5787  | 1.70 | 0.18 | 10  |
| 10 K12G11.3                                                       | VPLELVK                 | 13  | 8925  | 1.79 | 0.09 | 5   |
| 10 K12G11.3                                                       | NVTGWQLGDK              | 15  | 1191  | 1.94 | 0.12 | 6   |
| 7 K12G11.3                                                        | RGTVVVFGLPK             | 22  | 3861  | 2.48 | 0.16 | 6   |
| 10 K12H4.7a;K12H4.7b                                              | YLSSAQAIEDAAAFIK        | 82  | 1895  | 0.14 | 0.34 | 244 |
| 10 K12H4.7a;K12H4.7b                                              | YLSSAQAIEDAAAFIK        | 102 | 2606  | 0.16 | 0.35 | 222 |
| 10 K12H4.7a;K12H4.7b                                              | TFQQRYYHNNQWYK          | 23  | 5427  | 0.33 | 0.30 | 91  |
| 10 K12H4.7a;K12H4.7b                                              | YLSSAQAIEDAAAFIK        | 102 | 1472  | 0.48 | 0.15 | 30  |
| 1 K12H4.7a;K12H4.7b                                               | TFQQRYYHNNQWYK          | 11  | 5576  | 0.56 | 0.11 | 20  |
| 10 K12H4.7a;K12H4.7b                                              | HPELVYAAVGSSGPVQAEVDFK  | 29  | 2176  | 0.58 | 0.19 | 32  |
| 10 K12H4.7a;K12H4.7b                                              | TFQQRYYHNNQWYK          | 34  | 6831  | 1.14 | 0.09 | 8   |

|                      |                     |    |       |       |      |     |
|----------------------|---------------------|----|-------|-------|------|-----|
| 10 K12H4.7a;K12H4.7b | TFQQRYYHNNQWYK      | 11 | 5566  | 1.16  | 0.08 | 7   |
| 10 LLC1.3a;LLC1.3b   | FLLNTK              | 15 | 2865  | 0.12  | 0.48 | 393 |
| 10 LLC1.3a;LLC1.3b   | FLLNTK              | 15 | 1886  | 0.23  | 0.44 | 189 |
| 10 LLC1.3a;LLC1.3b   | QIVSSTGALS LGQVPK   | 41 | 2278  | 0.32  | 0.04 | 14  |
| 7 LLC1.3a;LLC1.3b    | QIVSSTGALS LGQVPK   | 52 | 877   | 0.34  | 0.42 | 121 |
| 7 LLC1.3a;LLC1.3b    | VGHVEGFATIVGPNTVQAK | 20 | 10452 | 0.35  | 0.30 | 85  |
| 10 LLC1.3a;LLC1.3b   | QIVSSTGALS LGQVPK   | 35 | 1784  | 0.41  | 0.24 | 59  |
| 22 LLC1.3a;LLC1.3b   | VPSIFAIGDVIEGPMLAHK | 10 | 2473  | 0.43  | 0.70 | 163 |
| 7 LLC1.3a;LLC1.3b    | QIVSSTGALS LGQVPK   | 67 | 3205  | 0.45  | 0.13 | 30  |
| 7 LLC1.3a;LLC1.3b    | QIVSSTGALS LGQVPK   | 67 | 3557  | 0.46  | 0.20 | 45  |
| 10 LLC1.3a;LLC1.3b   | FLLNTK              | 11 | 2815  | 0.48  | 0.23 | 47  |
| 22 LLC1.3a;LLC1.3b   | FLLNTK              | 12 | 1823  | 0.51  | 0.12 | 23  |
| 7 LLC1.3a;LLC1.3b    | VPSIFAIGDVIEGPMLAHK | 40 | 1014  | 0.51  | 0.27 | 53  |
| 1 LLC1.3a;LLC1.3b    | FLLNTK              | 27 | 1878  | 0.64  | 0.12 | 19  |
| 10 LLC1.3a;LLC1.3b   | FLLNTK              | 12 | 2659  | 0.64  | 0.15 | 23  |
| 10 LLC1.3a;LLC1.3b   | VPSIFAIGDVIEGPMLAHK | 27 | 703   | 0.66  | 0.19 | 28  |
| 1 LLC1.3a;LLC1.3b    | FLLNTK              | 12 | 1705  | 0.67  | 0.10 | 15  |
| 10 LLC1.3a;LLC1.3b   | QIVSSTGALS LGQVPK   | 53 | 1848  | 0.70  | 0.34 | 48  |
| 22 LLC1.3a;LLC1.3b   | FLLNTK              | 11 | 1843  | 0.75  | 0.20 | 26  |
| 1 LLC1.3a;LLC1.3b    | FPFVANSRAK          | 16 | 8180  | 0.76  | 0.11 | 15  |
| 1 LLC1.3a;LLC1.3b    | VGHVEGFATIVGPNTVQAK | 11 | 2482  | 0.76  | 0.15 | 20  |
| 22 LLC1.3a;LLC1.3b   | FLLNTK              | 22 | 3722  | 0.79  | 0.22 | 28  |
| 22 LLC1.3a;LLC1.3b   | FLLNTK              | 30 | 5833  | 0.79  | 0.06 | 8   |
| 7 LLC1.3a;LLC1.3b    | FPFVANSRAK          | 13 | 3215  | 0.84  | 0.12 | 15  |
| 1 LLC1.3a;LLC1.3b    | FPFVANSRAK          | 17 | 8597  | 0.85  | 0.16 | 19  |
| 22 LLC1.3a;LLC1.3b   | VGHVEGFATIVGPNTVQAK | 83 | 2902  | 0.86  | 0.20 | 24  |
| 22 LLC1.3a;LLC1.3b   | FLLNTK              | 31 | 6418  | 0.87  | 0.09 | 11  |
| 7 LLC1.3a;LLC1.3b    | FPFVANSRAK          | 19 | 10838 | 0.93  | 0.27 | 29  |
| 22 LLC1.3a;LLC1.3b   | QIVSSTGALS LGQVPK   | 77 | 5914  | 0.98  | 0.18 | 19  |
| 10 LLC1.3a;LLC1.3b   | QIVSSTGALS LGQVPK   | 43 | 1997  | 0.99  | 0.40 | 41  |
| 10 LLC1.3a;LLC1.3b   | QIVSSTGALS LGQVPK   | 26 | 1509  | 0.99  | 0.31 | 31  |
| 7 LLC1.3a;LLC1.3b    | FPFVANSRAK          | 13 | 5252  | 1.03  | 0.16 | 16  |
| 10 LLC1.3a;LLC1.3b   | QIVSSTGALS LGQVPK   | 29 | 1289  | 1.03  | 0.46 | 44  |
| 22 LLC1.3a;LLC1.3b   | QIVSSTGALS LGQVPK   | 69 | 4287  | 1.08  | 0.15 | 14  |
| 7 LLC1.3a;LLC1.3b    | QIVSSTGALS LGQVPK   | 28 | 1604  | 1.09  | 0.21 | 19  |
| 7 LLC1.3a;LLC1.3b    | FPFVANSRAK          | 13 | 9051  | 1.09  | 0.11 | 10  |
| 22 LLC1.3a;LLC1.3b   | QIVSSTGALS LGQVPK   | 36 | 1833  | 1.14  | 0.14 | 13  |
| 1 LLC1.3a;LLC1.3b    | NFQRS LTK           | 12 | 1511  | 1.16  | 0.34 | 29  |
| 7 LLC1.3a;LLC1.3b    | NFQRS LTK           | 18 | 2018  | 1.28  | 0.08 | 6   |
| 10 LLC1.3a;LLC1.3b   | NFQRS LTK           | 12 | 1248  | 1.31  | 0.11 | 9   |
| 7 LLC1.3a;LLC1.3b    | QIVSSTGALS LGQVPK   | 58 | 2143  | 1.35  | 0.13 | 10  |
| 22 LLC1.3a;LLC1.3b   | QIVSSTGALS LGQVPK   | 29 | 1749  | 1.35  | 0.14 | 10  |
| 22 LLC1.3a;LLC1.3b   | NFQRS LTK           | 17 | 3214  | 1.39  | 0.09 | 6   |
| 22 LLC1.3a;LLC1.3b   | VGHVEGFATIVGPNTVQAK | 17 | 11931 | 1.40  | 0.13 | 9   |
| 10 LLC1.3a;LLC1.3b   | QIVSSTGALS LGQVPK   | 37 | 1977  | 1.41  | 0.19 | 13  |
| 7 LLC1.3a;LLC1.3b    | FPFVANSRAK          | 14 | 3795  | 1.41  | 0.15 | 11  |
| 7 LLC1.3a;LLC1.3b    | QIVSSTGALS LGQVPK   | 67 | 2980  | 1.42  | 0.13 | 9   |
| 1 LLC1.3a;LLC1.3b    | QIVSSTGALS LGQVPK   | 79 | 1542  | 1.43  | 0.27 | 19  |
| 7 LLC1.3a;LLC1.3b    | FPFVANSRAK          | 16 | 5693  | 1.53  | 0.13 | 8   |
| 7 LLC1.3a;LLC1.3b    | NFQRS LTK           | 14 | 2028  | 1.53  | 0.08 | 5   |
| 7 LLC1.3a;LLC1.3b    | FLLNTK              | 15 | 2483  | 1.56  | 0.07 | 4   |
| 10 LLC1.3a;LLC1.3b   | NFQRS LTK           | 13 | 1714  | 1.68  | 0.13 | 8   |
| 7 LLC1.3a;LLC1.3b    | NFQRS LTK           | 12 | 1350  | 1.72  | 0.29 | 17  |
| 1 LLC1.3a;LLC1.3b    | QIVSSTGALS LGQVPK   | 68 | 1515  | 1.73  | 0.19 | 11  |
| 7 LLC1.3a;LLC1.3b    | QIVSSTGALS LGQVPK   | 20 | 1323  | 1.82  | 0.18 | 10  |
| 10 LLC1.3a;LLC1.3b   | QIVSSTGALS LGQVPK   | 42 | 1353  | 1.83  | 0.30 | 17  |
| 22 LLC1.3a;LLC1.3b   | NFQRS LTK           | 17 | 3328  | 2.40  | 0.22 | 9   |
| 10 LLC1.3a;LLC1.3b   | NFQRS LTK           | 19 | 2812  | 3.85  | 0.33 | 9   |
| 10 LLC1.3a;LLC1.3b   | QIVSSTGALS LGQVPK   | 51 | 2531  | 6.59  | 0.35 | 5   |
| 10 LLC1.3a;LLC1.3b   | VGHVEGFATIVGPNTVQAK | 13 | 5035  | 8.95  | 0.20 | 2   |
| 10 LLC1.3a;LLC1.3b   | QIVSSTGALS LGQVPK   | 30 | 2830  | 9.49  | 0.18 | 2   |
| 1 M01E11.5           | DVFBVHQT AISK       | 15 | 2587  | 0.31  | 0.09 | 28  |
| 10 M01E11.5          | IISEEAGLSK          | 21 | 1403  | 0.93  | 0.22 | 24  |
| 10 M01E11.5          | DVFBVHQT AISK       | 30 | 4198  | 1.47  | 0.16 | 11  |
| 10 M01E11.5          | IVLTAGLQ GK         | 11 | 1335  | 1.67  | 0.21 | 13  |
| 22 M01E11.5          | DVFBVHQT AISK       | 18 | 4079  | 1.69  | 0.16 | 9   |
| 22 M01E11.5          | DVFBVHQT AISK       | 37 | 4829  | 2.75  | 0.10 | 3   |
| 10 M01F1.2           | YMSFLRK             | 19 | 1251  | 0.36  | 0.56 | 155 |
| 10 M01F1.2           | GLSNRAI IIDGK       | 28 | 23737 | 0.50  | 0.19 | 38  |
| 10 M01F1.2           | GLSNRAI IIDGK       | 21 | 16189 | 0.53  | 0.16 | 31  |
| 22 M01F1.2           | NLAYEGVPAK          | 22 | 3511  | 0.60  | 0.06 | 10  |
| 22 M01F1.2           | NLAYEGVPAK          | 29 | 4302  | 0.69  | 0.10 | 15  |
| 7 M01F1.2            | NLAYEGVPAK          | 20 | 2905  | 0.78  | 0.10 | 13  |
| 7 M01F1.2            | NLAYEGVPAK          | 17 | 3181  | 0.92  | 0.10 | 11  |
| 1 M01F1.2            | NLAYEGVPAK          | 49 | 37641 | 1.00  | 0.15 | 15  |
| 1 M01F1.2            | NLAYEGVPAK          | 44 | 31792 | 1.04  | 0.07 | 7   |
| 1 M01F1.2            | GLSNRAI IIDGK       | 13 | 13029 | 1.46  | 0.10 | 7   |
| 22 M01F1.2           | NLAYEGVPAK          | 37 | 13665 | 1.53  | 0.10 | 7   |
| 22 M01F1.2           | YMSFLRK             | 14 | 1951  | 1.58  | 0.05 | 3   |
| 7 M01F1.2            | NLAYEGVPAK          | 35 | 22806 | 1.71  | 0.07 | 4   |
| 22 M01F1.2           | NLAYEGVPAK          | 35 | 10279 | 1.74  | 0.13 | 8   |
| 22 M01F1.2           | GAAYFEQK            | 36 | 4659  | 1.84  | 0.12 | 7   |
| 1 M01F1.2            | NLAYEGVPAK          | 43 | 7236  | 2.14  | 0.11 | 5   |
| 22 M01F1.2           | GLSNRAI IIDGK       | 30 | 37165 | 2.77  | 0.11 | 4   |
| 7 M01F1.2            | NLAYEGVPAK          | 34 | 5665  | 3.08  | 0.06 | 2   |
| 22 M01F1.2           | GLSNRAI IIDGK       | 15 | 23872 | 3.20  | 0.11 | 3   |
| 22 M01F1.2           | NLAYEGVPAK          | 29 | 11712 | 3.57  | 0.05 | 1   |
| 22 M01F1.2           | NLAYEGVPAK          | 19 | 9197  | 4.15  | 0.10 | 2   |
| 1 M01F1.2            | NLAYEGVPAK          | 31 | 2833  | 4.51  | 0.24 | 5   |
| 10 M01F1.2           | NLAYEGVPAK          | 48 | 16993 | 11.53 | 0.14 | 1   |
| 10 M01F1.2           | NLAYEGVPAK          | 43 | 11838 | 14.25 | 0.22 | 2   |
| 10 M01F1.2           | NLAYEGVPAK          | 35 | 5947  | 30.30 | 0.23 | 1   |
| 7 M02D8.1            | APPSIYGEPK          | 31 | 12205 | 0.88  | 0.12 | 14  |
| 10 M02D8.1           | DFDKPLAGEYK         | 20 | 10248 | 1.41  | 0.41 | 29  |
| 10 M02D8.1           | APPSIYGEPK          | 17 | 15533 | 1.42  | 0.35 | 25  |
| 10 M02D8.1           | APPSIYGEPK          | 19 | 18291 | 1.50  | 0.18 | 12  |
| 22 M03A8.1           | VISHASADDIAK        | 70 | 12054 | 0.28  | 0.24 | 89  |
| 22 M03A8.1           | VISHASADDIAK        | 66 | 11901 | 0.28  | 0.16 | 58  |
| 7 M03A8.1            | VISHASADDIAK        | 26 | 2453  | 0.37  | 0.12 | 33  |
| 7 M03A8.1            | VISHASADDIAK        | 21 | 1434  | 0.39  | 0.16 | 42  |
| 22 M03A8.1           | VAIVTGAGGGLGK       | 57 | 5362  | 0.53  | 0.11 | 21  |

|                                                          |                          |     |        |      |      |     |
|----------------------------------------------------------|--------------------------|-----|--------|------|------|-----|
| 7 M03A8.1                                                | VISHASADDIAK             | 52  | 6582   | 0.53 | 0.15 | 29  |
| 1 M03A8.1                                                | VAIVTGAGGGLGK            | 53  | 1957   | 0.53 | 0.15 | 28  |
| 10 M03A8.1                                               | SIVLYIITDGK              | 59  | 866    | 0.55 | 0.19 | 34  |
| 10 M03A8.1                                               | VAIVTGAGGGLGK            | 51  | 3007   | 0.55 | 0.21 | 37  |
| 22 M03A8.1                                               | VAIVTGAGGGLGK            | 56  | 7561   | 0.58 | 0.10 | 17  |
| 10 M03A8.1                                               | VAIVTGAGGGLGK            | 45  | 3842   | 0.59 | 0.18 | 30  |
| 22 M03A8.1                                               | VISHASADDIAK             | 44  | 4882   | 0.59 | 0.12 | 20  |
| 7 M03A8.1                                                | VISHASADDIAK             | 50  | 5818   | 0.65 | 0.13 | 20  |
| 22 M03A8.1                                               | SALIGLSNSLAQEGAK         | 108 | 2101   | 0.72 | 0.19 | 26  |
| 10 M03A8.1                                               | VAIVTGAGGGLGK            | 63  | 3682   | 0.73 | 0.35 | 48  |
| 10 M03A8.1                                               | VAIVTGAGGGLGK            | 34  | 5560   | 0.74 | 0.15 | 21  |
| 22 M03A8.1                                               | VAIVTGAGGGLGK            | 80  | 4838   | 0.75 | 0.14 | 19  |
| 10 M03A8.1                                               | VAIVTGAGGGLGK            | 51  | 2867   | 0.77 | 0.22 | 29  |
| 7 M03A8.1                                                | SALIGLSNSLAQEGAK         | 100 | 1986   | 0.77 | 0.14 | 18  |
| 10 M03A8.1                                               | VAIVTGAGGGLGK            | 61  | 5091   | 0.78 | 0.12 | 15  |
| 7 M03A8.1                                                | VISHASADDIAK             | 65  | 6609   | 0.78 | 0.11 | 14  |
| 7 M03A8.1                                                | VISHASADDIAK             | 55  | 9483   | 0.78 | 0.06 | 8   |
| 22 M03A8.1                                               | SALIGLSNSLAQEGAK         | 72  | 1662   | 0.79 | 0.15 | 19  |
| 10 M03A8.1                                               | VISHASADDIAK             | 57  | 11761  | 0.80 | 0.10 | 12  |
| 1 M03A8.1                                                | VISHASADDIAK             | 71  | 10515  | 0.82 | 0.11 | 13  |
| 7 M03A8.1                                                | SALIGLSNSLAQEGAK         | 126 | 2951   | 0.82 | 0.18 | 22  |
| 1 M03A8.1                                                | VAIVTGAGGGLGK            | 40  | 1666   | 0.84 | 0.15 | 18  |
| 7 M03A8.1                                                | VISHASADDIAK             | 82  | 10496  | 0.86 | 0.10 | 12  |
| 1 M03A8.1                                                | VAIVTGAGGGLGK            | 76  | 2625   | 0.88 | 0.14 | 17  |
| 7 M03A8.1                                                | VAIVTGAGGGLGK            | 43  | 2970   | 0.91 | 0.17 | 19  |
| 1 M03A8.1                                                | VISHASADDIAK             | 39  | 3454   | 0.91 | 0.11 | 12  |
| 10 M03A8.1                                               | VAIVTGAGGGLGK            | 65  | 3477   | 0.94 | 0.13 | 14  |
| 1 M03A8.1                                                | VISHASADDIAK             | 58  | 7249   | 0.96 | 0.10 | 10  |
| 10 M03A8.1                                               | VISHASADDIAK             | 78  | 10504  | 0.97 | 0.10 | 11  |
| 22 M03A8.1                                               | VISHASADDIAK             | 59  | 6552   | 0.98 | 0.05 | 5   |
| 10 M03A8.1                                               | VAIVTGAGGGLGK            | 56  | 4847   | 0.98 | 0.20 | 20  |
| 1 M03A8.1                                                | SALIGLSNSLAQEGAK         | 51  | 336    | 1.01 | 0.27 | 27  |
| 22 M03A8.1                                               | VISHASADDIAK             | 67  | 8439   | 1.11 | 0.10 | 9   |
| 7 M03A8.1                                                | VAIVTGAGGGLGK            | 31  | 1750   | 1.12 | 0.16 | 14  |
| 1 M03A8.1                                                | VAIVTGAGGGLGK            | 83  | 2367   | 1.12 | 0.07 | 6   |
| 7 M03A8.1                                                | VISHASADDIAK             | 35  | 5454   | 1.13 | 0.10 | 9   |
| 22 M03A8.1                                               | SALIGLSNSLAQEGAK         | 128 | 3039   | 1.15 | 0.17 | 15  |
| 22 M03A8.1                                               | LQTVLEK                  | 22  | 666    | 1.22 | 0.26 | 21  |
| 10 M03A8.1                                               | SALIGLSNSLAQEGAK         | 81  | 2136   | 1.26 | 0.12 | 10  |
| 10 M03A8.1                                               | SALIGLSNSLAQEGAK         | 114 | 1945   | 1.27 | 0.11 | 9   |
| 1 M03A8.1                                                | SIVLYIITDGK              | 43  | 656    | 1.29 | 0.21 | 16  |
| 7 M03A8.1                                                | VAIVTGAGGGLGK            | 77  | 3681   | 1.32 | 0.09 | 7   |
| 22 M03A8.1                                               | VAIVTGAGGGLGK            | 73  | 4515   | 1.33 | 0.14 | 10  |
| 7 M03A8.1                                                | SALIGLSNSLAQEGAK         | 86  | 1968   | 1.34 | 0.10 | 8   |
| 1 M03A8.1                                                | SALIGLSNSLAQEGAK         | 50  | 422    | 1.43 | 0.19 | 13  |
| 22 M03A8.1                                               | SALIGLSNSLAQEGAK         | 112 | 2413   | 1.50 | 0.17 | 11  |
| 7 M03A8.1                                                | SALIGLSNSLAQEGAK         | 90  | 1816   | 1.66 | 0.14 | 8   |
| 7 M03A8.1                                                | VAIVTGAGGGLGK            | 70  | 3897   | 1.73 | 0.08 | 5   |
| 1 M03A8.1                                                | SALIGLSNSLAQEGAK         | 92  | 2255   | 1.75 | 0.12 | 7   |
| 22 M03A8.1                                               | VAIVTGAGGGLGK            | 54  | 4808   | 1.75 | 0.15 | 9   |
| 1 M03A8.1                                                | SALIGLSNSLAQEGAK         | 123 | 1995   | 1.79 | 0.18 | 10  |
| 22 M03A8.1                                               | VAIVTGAGGGLGK            | 51  | 5264   | 1.88 | 0.07 | 4   |
| 1 M03A8.1                                                | SIVLYIITDGK              | 43  | 833    | 1.88 | 0.10 | 6   |
| 1 M03A8.1                                                | VAIVTGAGGGLGK            | 74  | 1982   | 2.27 | 0.12 | 5   |
| 1 M03A8.1                                                | VAIVTGAGGGLGK            | 78  | 2191   | 2.29 | 0.13 | 6   |
| 22 M03A8.1                                               | VAIVTGAGGGLGK            | 52  | 4351   | 2.50 | 0.16 | 6   |
| 22 M03A8.1                                               | VAIVTGAGGGLGK            | 59  | 4425   | 2.73 | 0.13 | 5   |
| 1 M03F4.2a;M03F4.2b;M03F4.2c;T04C12.4;T04C12.5;T04C12.6  | RGILTLK                  | 36  | 3185   | 0.08 | 0.25 | 332 |
| 1 M03F4.2a;M03F4.2b;M03F4.2c;T04C12.4;T04C12.5;T04C12.6  | RGILTLK                  | 30  | 7381   | 0.62 | 0.05 | 8   |
| 1 M03F4.2a;M03F4.2b;M03F4.2c;T04C12.4;T04C12.5;T04C12.6  | RGILTLK                  | 33  | 5973   | 0.62 | 0.09 | 15  |
| 1 M03F4.2a;M03F4.2b;M03F4.2c;T04C12.4;T04C12.5;T04C12.6  | RGILTLK                  | 22  | 5168   | 0.64 | 0.11 | 17  |
| 1 M03F4.2a;M03F4.2b;M03F4.2c;T04C12.4;T04C12.5;T04C12.6  | RGILTLK                  | 33  | 172309 | 0.67 | 0.05 | 7   |
| 1 M03F4.2a;M03F4.2b;M03F4.2c;T04C12.4;T04C12.5;T04C12.6  | RGILTLK                  | 11  | 3462   | 0.68 | 0.05 | 8   |
| 1 M03F4.2a;M03F4.2b;M03F4.2c;T04C12.4;T04C12.5;T04C12.6  | RGILTLK                  | 27  | 102312 | 0.72 | 0.10 | 14  |
| 1 M03F4.2a;M03F4.2b;M03F4.2c;T04C12.4;T04C12.5;T04C12.6  | RGILTLK                  | 34  | 92491  | 0.77 | 0.10 | 13  |
| 1 M03F4.2a;M03F4.2b;M03F4.2c;T04C12.4;T04C12.5;T04C12.6  | RGILTLK                  | 43  | 137544 | 0.87 | 0.17 | 20  |
| 1 M03F4.2a;M03F4.2b;M03F4.2c;T04C12.4;T04C12.5;T04C12.6  | RGILTLK                  | 12  | 762    | 0.93 | 0.10 | 11  |
| 1 M03F4.2a;M03F4.2b;M03F4.2c;T04C12.4;T04C12.5;T04C12.6  | RGILTLK                  | 21  | 3865   | 0.97 | 0.06 | 6   |
| 1 M03F4.2a;M03F4.2b;M03F4.2c;T04C12.4;T04C12.5;T04C12.6  | IIAPPERK                 | 16  | 6015   | 1.00 | 0.14 | 14  |
| 1 M03F4.2a;M03F4.2b;M03F4.2c;T04C12.4;T04C12.5;T04C12.6  | RGILTLK                  | 14  | 2374   | 1.02 | 0.10 | 10  |
| 1 M03F4.2a;M03F4.2b;M03F4.2c;T04C12.4;T04C12.5;T04C12.6  | RGILTLK                  | 14  | 2188   | 1.04 | 0.15 | 14  |
| 1 M03F4.2a;M03F4.2b;M03F4.2c;T04C12.4;T04C12.5;T04C12.6  | IIAPPERK                 | 22  | 5416   | 1.05 | 0.17 | 16  |
| 1 M03F4.2a;M03F4.2b;M03F4.2c;T04C12.4;T04C12.5;T04C12.6  | IIAPPERK                 | 12  | 3891   | 1.22 | 0.12 | 10  |
| 1 M03F4.2a;M03F4.2b;M03F4.2c;T04C12.4;T04C12.5;T04C12.6  | IIAPPERK                 | 16  | 3772   | 1.38 | 0.25 | 18  |
| 1 M03F4.2a;M03F4.2b;M03F4.2c;T04C12.4;T04C12.5;T04C12.6  | RGILTLK                  | 23  | 2332   | 2.10 | 0.43 | 20  |
| 1 M03F4.2a;M03F4.2b;M03F4.2c;T04C12.4;T04C12.5;T04C12.6  | RGILTLK                  | 24  | 3055   | 2.53 | 0.13 | 5   |
| 1 M03F4.2a;M03F4.2b;M03F4.2c;T04C12.4;T04C12.5;T04C12.6  | RGILTLK                  | 33  | 3369   | 2.88 | 0.06 | 2   |
| 1 M03F4.2a;M03F4.2b;M03F4.2c;T04C12.4;T04C12.5;T04C12.6  | RGILTLK                  | 24  | 1932   | 2.89 | 0.39 | 14  |
| 1 M03F4.2a;M03F4.2b;M03F4.2c;T04C12.4;T04C12.5;T04C12.6  | RGILTLK                  | 24  | 7779   | 2.99 | 0.06 | 2   |
| 1 M03F4.2a;M03F4.2b;M03F4.2c;T04C12.4;T04C12.5;T04C12.6  | RGILTLK                  | 31  | 7298   | 3.09 | 0.12 | 4   |
| 1 M03F4.2a;M03F4.2b;M03F4.2c;T04C12.4;T04C12.5;T04C12.6  | RGILTLK                  | 22  | 4119   | 3.71 | 0.16 | 4   |
| 1 M03F4.2a;M03F4.2b;M03F4.2c;T04C12.4;T04C12.5;T04C12.6  | RGILTLK                  | 38  | 3514   | 5.00 | 0.16 | 3   |
| 1 M03F4.2a;M03F4.2b;M03F4.2c;T04C12.4;T04C12.5;T04C12.6  | RGILTLK                  | 16  | 2817   | 8.81 | 0.18 | 2   |
| 22 M03F4.2a;T04C12.4;T04C12.5;T04C12.6;M03F4.2b;M03F4.2c | DSYVGDEAQSK              | 37  | 4252   | 0.27 | 0.22 | 79  |
| 22 M03F4.2a;T04C12.4;T04C12.5;T04C12.6;M03F4.2b;M03F4.2c | DSYVGDEAQSK              | 25  | 2614   | 0.29 | 0.14 | 49  |
| 22 M03F4.2a;T04C12.4;T04C12.5;T04C12.6;M03F4.2b;M03F4.2c | RGILTLK                  | 36  | 29628  | 0.39 | 0.04 | 11  |
| 22 M03F4.2a;T04C12.4;T04C12.5;T04C12.6;M03F4.2b;M03F4.2c | RGILTLK                  | 33  | 37391  | 0.43 | 0.09 | 21  |
| 22 M03F4.2a;T04C12.4;T04C12.5;T04C12.6;M03F4.2b;M03F4.2c | EITALAPSTMK              | 17  | 9283   | 0.47 | 0.14 | 29  |
| 22 M03F4.2a;T04C12.4;T04C12.5;T04C12.6;M03F4.2b;M03F4.2c | DLYANTVLSGGTTMYPGIADRMQK | 69  | 6091   | 0.56 | 0.18 | 32  |
| 22 M03F4.2a;T04C12.4;T04C12.5;T04C12.6;M03F4.2b;M03F4.2c | IIAPPERK                 | 45  | 114317 | 0.66 | 0.13 | 20  |
| 22 M03F4.2a;T04C12.4;T04C12.5;T04C12.6;M03F4.2b;M03F4.2c | DLYANTVLSGGTTMYPGIADRMQK | 70  | 6152   | 0.71 | 0.22 | 31  |
| 22 M03F4.2a;T04C12.4;T04C12.5;T04C12.6;M03F4.2b;M03F4.2c | IIAPPERK                 | 40  | 106555 | 0.75 | 0.06 | 9   |
| 22 M03F4.2a;T04C12.4;T04C12.5;T04C12.6;M03F4.2b;M03F4.2c | QEYDESGPSIVHRK           | 27  | 36921  | 0.78 | 0.14 | 18  |
| 22 M03F4.2a;T04C12.4;T04C12.5;T04C12.6;M03F4.2b;M03F4.2c | IIAPPERK                 | 24  | 6481   | 0.78 | 0.17 | 22  |
| 22 M03F4.2a;T04C12.4;T04C12.5;T04C12.6;M03F4.2b;M03F4.2c | RGILTLK                  | 23  | 24951  | 0.81 | 0.11 | 13  |
| 22 M03F4.2a;T04C12.4;T04C12.5;T04C12.6;M03F4.2b;M03F4.2c | RGILTLK                  | 34  | 127537 | 0.84 | 0.08 | 9   |
| 22 M03F4.2a;T04C12.4;T04C12.5;T04C12.6;M03F4.2b;M03F4.2c | RGILTLK                  | 28  | 158208 | 0.85 | 0.08 | 10  |
| 22 M03F4.2a;T04C12.4;T04C12.5;T04C12.6;M03F4.2b;M03F4.2c | QEYDESGPSIVHRK           | 17  | 24171  | 0.87 | 0.18 | 21  |
| 22 M03F4.2a;T04C12.4;T04C12.5;T04C12.6;M03F4.2b;M03F4.2c | DLYANTVLSGGTTMYPGIADRMQK | 73  | 5567   | 0.89 | 0.24 | 27  |
| 22 M03F4.2a;T04C12.4;T04C12.5;T04C12.6;M03F4.2b;M03F4.2c | QEYDESGPSIVHRK           | 28  | 25803  | 0.89 | 0.09 | 10  |
| 22 M03F4.2a;T04C12.4;T04C12.5;T04C12.6;M03F4.2b;M03F4.2c | QEYDESGPSIVHRK           | 22  | 7582   | 0.90 | 0.06 | 7   |

|    |                                                       |                          |     |        |      |      |     |
|----|-------------------------------------------------------|--------------------------|-----|--------|------|------|-----|
| 22 | M03F4.2a;T04C12.4;T04C12.5;T04C12.6;M03F4.2b;M03F4.2c | EITALAPSTMK              | 40  | 44034  | 0.97 | 0.10 | 10  |
| 22 | M03F4.2a;T04C12.4;T04C12.5;T04C12.6;M03F4.2b;M03F4.2c | RGILTLK                  | 13  | 2503   | 0.98 | 0.16 | 16  |
| 22 | M03F4.2a;T04C12.4;T04C12.5;T04C12.6;M03F4.2b;M03F4.2c | RGILTLK                  | 19  | 22362  | 1.00 | 0.12 | 12  |
| 22 | M03F4.2a;T04C12.4;T04C12.5;T04C12.6;M03F4.2b;M03F4.2c | DLYANTVLSGGTTMYPGIADRMQK | 76  | 5947   | 1.00 | 0.21 | 21  |
| 22 | M03F4.2a;T04C12.4;T04C12.5;T04C12.6;M03F4.2b;M03F4.2c | RGILTLK                  | 14  | 2457   | 1.01 | 0.12 | 12  |
| 22 | M03F4.2a;T04C12.4;T04C12.5;T04C12.6;M03F4.2b;M03F4.2c | RGILTLK                  | 12  | 15054  | 1.02 | 0.07 | 7   |
| 22 | M03F4.2a;T04C12.4;T04C12.5;T04C12.6;M03F4.2b;M03F4.2c | RGILTLK                  | 15  | 2652   | 1.04 | 0.05 | 5   |
| 22 | M03F4.2a;T04C12.4;T04C12.5;T04C12.6;M03F4.2b;M03F4.2c | RGILTLK                  | 21  | 16379  | 1.04 | 0.07 | 7   |
| 22 | M03F4.2a;T04C12.4;T04C12.5;T04C12.6;M03F4.2b;M03F4.2c | EITALAPSTMK              | 36  | 27830  | 1.06 | 0.20 | 19  |
| 22 | M03F4.2a;T04C12.4;T04C12.5;T04C12.6;M03F4.2b;M03F4.2c | QEYDESGPSIVHRK           | 47  | 25869  | 1.06 | 0.13 | 12  |
| 22 | M03F4.2a;T04C12.4;T04C12.5;T04C12.6;M03F4.2b;M03F4.2c | RGILTLK                  | 17  | 2839   | 1.09 | 0.07 | 6   |
| 22 | M03F4.2a;T04C12.4;T04C12.5;T04C12.6;M03F4.2b;M03F4.2c | RGILTLK                  | 54  | 152155 | 1.09 | 0.11 | 10  |
| 22 | M03F4.2a;T04C12.4;T04C12.5;T04C12.6;M03F4.2b;M03F4.2c | RGILTLK                  | 52  | 98876  | 1.13 | 0.13 | 11  |
| 22 | M03F4.2a;T04C12.4;T04C12.5;T04C12.6;M03F4.2b;M03F4.2c | CDIDIRK                  | 21  | 6967   | 1.13 | 0.12 | 11  |
| 22 | M03F4.2a;T04C12.4;T04C12.5;T04C12.6;M03F4.2b;M03F4.2c | CDIDIRK                  | 29  | 6097   | 1.14 | 0.12 | 11  |
| 22 | M03F4.2a;T04C12.4;T04C12.5;T04C12.6;M03F4.2b;M03F4.2c | QEYDESGPSIVHRK           | 19  | 8810   | 1.20 | 0.18 | 15  |
| 22 | M03F4.2a;T04C12.4;T04C12.5;T04C12.6;M03F4.2b;M03F4.2c | IAPPERK                  | 23  | 7287   | 1.21 | 0.22 | 18  |
| 22 | M03F4.2a;T04C12.4;T04C12.5;T04C12.6;M03F4.2b;M03F4.2c | RGILTLK                  | 30  | 141205 | 1.21 | 0.08 | 7   |
| 22 | M03F4.2a;T04C12.4;T04C12.5;T04C12.6;M03F4.2b;M03F4.2c | RGILTLK                  | 31  | 89948  | 1.24 | 0.06 | 5   |
| 22 | M03F4.2a;T04C12.4;T04C12.5;T04C12.6;M03F4.2b;M03F4.2c | RGILTLK                  | 20  | 1650   | 1.54 | 0.19 | 13  |
| 22 | M03F4.2a;T04C12.4;T04C12.5;T04C12.6;M03F4.2b;M03F4.2c | IAPPERK                  | 18  | 17270  | 1.58 | 0.27 | 17  |
| 22 | M03F4.2a;T04C12.4;T04C12.5;T04C12.6;M03F4.2b;M03F4.2c | RGILTLK                  | 16  | 1338   | 1.63 | 0.13 | 8   |
| 22 | M03F4.2a;T04C12.4;T04C12.5;T04C12.6;M03F4.2b;M03F4.2c | IAPPERK                  | 11  | 6866   | 1.63 | 0.37 | 23  |
| 22 | M03F4.2a;T04C12.4;T04C12.5;T04C12.6;M03F4.2b;M03F4.2c | DLYANTVLSGGTTMYPGIADRMQK | 99  | 7091   | 1.82 | 0.14 | 8   |
| 22 | M03F4.2a;T04C12.4;T04C12.5;T04C12.6;M03F4.2b;M03F4.2c | DLYANTVLSGGTTMYPGIADRMQK | 118 | 7616   | 1.88 | 0.09 | 5   |
| 22 | M03F4.2a;T04C12.4;T04C12.5;T04C12.6;M03F4.2b;M03F4.2c | RGILTLK                  | 20  | 5049   | 1.94 | 0.08 | 4   |
| 22 | M03F4.2a;T04C12.4;T04C12.5;T04C12.6;M03F4.2b;M03F4.2c | RGILTLK                  | 10  | 3429   | 2.01 | 0.10 | 5   |
| 22 | M03F4.2a;T04C12.4;T04C12.5;T04C12.6;M03F4.2b;M03F4.2c | RGILTLK                  | 17  | 3452   | 2.08 | 0.15 | 7   |
| 22 | M03F4.2a;T04C12.4;T04C12.5;T04C12.6;M03F4.2b;M03F4.2c | RGILTLK                  | 15  | 1902   | 2.64 | 0.11 | 4   |
| 22 | M03F4.2a;T04C12.4;T04C12.5;T04C12.6;M03F4.2b;M03F4.2c | RGILTLK                  | 16  | 1668   | 2.82 | 0.08 | 3   |
| 22 | M03F4.2a;T04C12.4;T04C12.5;T04C12.6;M03F4.2b;M03F4.2c | RGILTLK                  | 19  | 1339   | 2.95 | 0.18 | 6   |
| 22 | M03F4.2a;T04C12.4;T04C12.5;T04C12.6;M03F4.2b;M03F4.2c | RGILTLK                  | 22  | 2187   | 3.28 | 0.16 | 5   |
| 22 | M03F4.2a;T04C12.4;T04C12.5;T04C12.6;M03F4.2b;M03F4.2c | RGILTLK                  | 18  | 1470   | 3.70 | 0.21 | 6   |
| 22 | M03F4.2a;T04C12.4;T04C12.5;T04C12.6;M03F4.2b;M03F4.2c | RGILTLK                  | 23  | 5250   | 3.74 | 0.12 | 3   |
| 22 | M03F4.2a;T04C12.4;T04C12.5;T04C12.6;M03F4.2b;M03F4.2c | RGILTLK                  | 11  | 3683   | 4.02 | 0.06 | 2   |
| 22 | M03F4.2a;T04C12.4;T04C12.5;T04C12.6;M03F4.2b;M03F4.2c | RGILTLK                  | 17  | 3587   | 4.33 | 0.17 | 4   |
| 22 | M03F4.2a;T04C12.4;T04C12.5;T04C12.6;M03F4.2b;M03F4.2c | RGILTLK                  | 39  | 5749   | 4.57 | 0.18 | 4   |
| 7  | M03F4.2b;M03F4.2c                                     | EITALAPSTMK              | 12  | 3465   | 1.27 | 0.09 | 7   |
| 10 | M03F4.2c;M03F4.2b                                     | CDIDIRK                  | 17  | 5600   | 0.28 | 0.16 | 56  |
| 10 | M03F4.2c;M03F4.2b                                     | RGILTLK                  | 18  | 9119   | 0.59 | 0.06 | 11  |
| 10 | M03F4.2c;M03F4.2b                                     | RGILTLK                  | 26  | 8280   | 0.59 | 0.07 | 12  |
| 10 | M03F4.2c;M03F4.2b                                     | DLYANTVLSGGTTMYPGIADRMQK | 56  | 4265   | 0.60 | 0.25 | 41  |
| 10 | M03F4.2c;M03F4.2b                                     | QEYDESGPSIVHRK           | 20  | 21671  | 0.62 | 0.12 | 20  |
| 10 | M03F4.2c;M03F4.2b                                     | RGILTLK                  | 33  | 47909  | 0.65 | 0.12 | 18  |
| 10 | M03F4.2c;M03F4.2b                                     | RGILTLK                  | 36  | 61471  | 0.68 | 0.06 | 8   |
| 10 | M03F4.2c;M03F4.2b                                     | RGILTLK                  | 30  | 33097  | 0.68 | 0.15 | 22  |
| 10 | M03F4.2c;M03F4.2b                                     | RGILTLK                  | 21  | 24162  | 0.69 | 0.08 | 11  |
| 10 | M03F4.2c;M03F4.2b                                     | QEYDESGPSIVHRK           | 24  | 21631  | 0.74 | 0.10 | 13  |
| 10 | M03F4.2c;M03F4.2b                                     | DLYANTVLSGGTTMYPGIADRMQK | 52  | 2640   | 0.75 | 0.17 | 22  |
| 10 | M03F4.2c;M03F4.2b                                     | RGILTLK                  | 13  | 5272   | 0.76 | 0.08 | 10  |
| 10 | M03F4.2c;M03F4.2b                                     | QEYDESGPSIVHRK           | 12  | 10050  | 0.81 | 0.18 | 23  |
| 10 | M03F4.2c;M03F4.2b                                     | QEYDESGPSIVHRK           | 26  | 12986  | 0.89 | 0.07 | 8   |
| 10 | M03F4.2c;M03F4.2b                                     | RGILTLK                  | 39  | 42163  | 0.91 | 0.06 | 7   |
| 10 | M03F4.2c;M03F4.2b                                     | IAPPERK                  | 14  | 12933  | 0.93 | 0.18 | 19  |
| 10 | M03F4.2c;M03F4.2b                                     | RGILTLK                  | 38  | 46139  | 1.02 | 0.08 | 8   |
| 10 | M03F4.2c;M03F4.2b                                     | IAPPERK                  | 19  | 11040  | 1.02 | 0.23 | 23  |
| 10 | M03F4.2c;M03F4.2b                                     | RGILTLK                  | 16  | 2833   | 1.06 | 0.07 | 7   |
| 10 | M03F4.2c;M03F4.2b                                     | RGILTLK                  | 35  | 153855 | 1.07 | 0.06 | 6   |
| 10 | M03F4.2c;M03F4.2b                                     | RGILTLK                  | 39  | 76841  | 1.10 | 0.07 | 7   |
| 10 | M03F4.2c;M03F4.2b                                     | IAPPERK                  | 24  | 12990  | 1.15 | 0.20 | 17  |
| 10 | M03F4.2c;M03F4.2b                                     | RGILTLK                  | 29  | 69966  | 1.15 | 0.05 | 4   |
| 10 | M03F4.2c;M03F4.2b                                     | RGILTLK                  | 41  | 174232 | 1.16 | 0.15 | 13  |
| 10 | M03F4.2c;M03F4.2b                                     | RGILTLK                  | 10  | 2464   | 1.19 | 0.16 | 13  |
| 10 | M03F4.2c;M03F4.2b                                     | IAPPERK                  | 12  | 10943  | 1.37 | 0.15 | 11  |
| 10 | M03F4.2c;M03F4.2b                                     | IAPPERK                  | 18  | 5534   | 1.42 | 0.10 | 7   |
| 10 | M03F4.2c;M03F4.2b                                     | IAPPERK                  | 27  | 13061  | 1.43 | 0.19 | 14  |
| 10 | M03F4.2c;M03F4.2b                                     | IAPPERK                  | 20  | 6121   | 1.51 | 0.25 | 17  |
| 10 | M03F4.2c;M03F4.2b                                     | IAPPERK                  | 25  | 12666  | 1.55 | 0.16 | 11  |
| 10 | M03F4.2c;M03F4.2b                                     | RGILTLK                  | 14  | 6730   | 2.14 | 0.14 | 6   |
| 10 | M03F4.2c;M03F4.2b                                     | RGILTLK                  | 17  | 2855   | 2.32 | 0.11 | 5   |
| 10 | M03F4.2c;M03F4.2b                                     | RGILTLK                  | 16  | 9409   | 2.40 | 0.07 | 3   |
| 10 | M03F4.2c;M03F4.2b                                     | RGILTLK                  | 11  | 2326   | 2.58 | 0.17 | 6   |
| 10 | M03F4.2c;M03F4.2b                                     | RGILTLK                  | 11  | 1629   | 2.91 | 0.16 | 5   |
| 10 | M03F4.2c;M03F4.2b                                     | RGILTLK                  | 25  | 5532   | 2.97 | 0.14 | 5   |
| 10 | M03F4.2c;M03F4.2b                                     | RGILTLK                  | 26  | 8126   | 3.15 | 0.12 | 4   |
| 10 | M03F4.2c;M03F4.2b                                     | RGILTLK                  | 22  | 4098   | 3.15 | 0.05 | 2   |
| 10 | M03F4.2c;M03F4.2b                                     | RGILTLK                  | 19  | 5321   | 3.37 | 0.17 | 5   |
| 10 | M03F4.2c;M03F4.2b                                     | RGILTLK                  | 15  | 3415   | 3.91 | 0.16 | 4   |
| 10 | M03F4.2c;M03F4.2b                                     | RGILTLK                  | 21  | 8148   | 4.02 | 0.14 | 3   |
| 10 | M03F4.2c;M03F4.2b                                     | RGILTLK                  | 20  | 1725   | 8.41 | 0.25 | 3   |
| 22 | M03F4.7a                                              | RYVNNDVDRTWK             | 27  | 42116  | 0.10 | 0.32 | 315 |
| 22 | M03F4.7a                                              | RYVNNDVDRTWK             | 31  | 52262  | 0.10 | 0.55 | 538 |
| 22 | M03F4.7a                                              | DHINFMQK                 | 23  | 9103   | 0.22 | 0.64 | 298 |
| 22 | M03F4.7a                                              | RYVNNDVDRTWK             | 28  | 52727  | 0.24 | 0.39 | 161 |
| 22 | M03F4.7a                                              | DTAAEFDELTPK             | 22  | 9800   | 0.27 | 0.50 | 187 |
| 7  | M03F4.7a                                              | DHINFMQK                 | 11  | 2001   | 0.33 | 0.18 | 56  |
| 7  | M03F4.7a                                              | DTAAEFDELTPK             | 33  | 8712   | 0.36 | 0.08 | 23  |
| 7  | M03F4.7a                                              | DTAAEFDELTPK             | 20  | 2970   | 0.37 | 0.15 | 42  |
| 22 | M03F4.7a                                              | DHINFMQK                 | 24  | 10701  | 0.37 | 0.47 | 126 |
| 7  | M03F4.7a                                              | DTAAEFDELTPK             | 21  | 3434   | 0.49 | 0.16 | 33  |
| 7  | M03F4.7a                                              | DTAAEFDELTPK             | 16  | 2339   | 0.69 | 0.26 | 37  |
| 22 | M03F4.7a                                              | RYVNNDVDRTWK             | 19  | 56806  | 0.73 | 0.28 | 39  |
| 1  | M03F4.7a                                              | DTAAEFDELTPK             | 23  | 2514   | 0.86 | 0.11 | 13  |
| 22 | M03F4.7a                                              | MDADSDGFIEENELK          | 118 | 5250   | 0.98 | 0.09 | 9   |
| 22 | M03F4.7a                                              | MDADSDGFIEENELK          | 84  | 5278   | 1.00 | 0.11 | 11  |
| 1  | M03F4.7a                                              | DTAAEFDELTPK             | 35  | 2759   | 1.00 | 0.07 | 7   |
| 1  | M03F4.7a                                              | DTAAEFDELTPK             | 28  | 2999   | 1.04 | 0.19 | 18  |
| 22 | M03F4.7a                                              | DTAAEFDELTPK             | 12  | 6275   | 1.11 | 0.13 | 12  |
| 22 | M03F4.7a                                              | DTAAEFDELTPK             | 14  | 5992   | 1.12 | 0.15 | 13  |
| 22 | M03F4.7a                                              | DHINFMQK                 | 15  | 11761  | 1.16 | 0.12 | 10  |
| 1  | M03F4.7a                                              | DHINFMQK                 | 13  | 6834   | 1.95 | 0.08 | 4   |

|                                           |                       |    |       |      |      |    |
|-------------------------------------------|-----------------------|----|-------|------|------|----|
| 1 M03F4.7a                                | DHINFMQK              | 21 | 8040  | 2.01 | 0.07 | 4  |
| 1 M03F4.7a                                | DHINFMQK              | 14 | 5696  | 2.24 | 0.09 | 4  |
| 1 M03F4.7a                                | DHINFMQK              | 16 | 7056  | 2.57 | 0.19 | 7  |
| 22 M03F4.7a                               | DHINFMQK              | 19 | 12258 | 2.60 | 0.17 | 7  |
| 10 M03F4.7a;M03F4.7b                      | MDADSDGFIEENELK       | 88 | 2690  | 0.39 | 0.21 | 53 |
| 10 M03F4.7a;M03F4.7b                      | DTAAEFDELTP EK        | 41 | 5998  | 0.39 | 0.24 | 61 |
| 10 M03F4.7a;M03F4.7b                      | DHINFMQK              | 16 | 11352 | 0.41 | 0.09 | 23 |
| 10 M03F4.7a;M03F4.7b                      | DHINFMQK              | 19 | 3618  | 0.47 | 0.24 | 50 |
| 10 M03F4.7a;M03F4.7b                      | DHINFMQK              | 18 | 9253  | 0.52 | 0.19 | 36 |
| 10 M03F4.7a;M03F4.7b                      | DHINFMQK              | 14 | 8718  | 0.62 | 0.15 | 24 |
| 10 M03F4.7a;M03F4.7b                      | DHINFMQK              | 15 | 9568  | 0.67 | 0.06 | 9  |
| 10 M03F4.7a;M03F4.7b                      | DHINFMQK              | 19 | 6924  | 0.72 | 0.12 | 16 |
| 10 M03F4.7a;M03F4.7b                      | DTAAEFDELTP EK        | 25 | 3335  | 0.77 | 0.38 | 50 |
| 10 M03F4.7a;M03F4.7b                      | RYVNNNDVDR TWK        | 23 | 21602 | 0.80 | 0.20 | 25 |
| 10 M03F4.7a;M03F4.7b                      | RYVNNNDVDR TWK        | 17 | 35747 | 0.98 | 0.21 | 22 |
| 7 M110.4a;M110.4b;M110.4c;M110.4d;M110.4e | ELVDSITDYVGK          | 40 | 971   | 0.70 | 0.21 | 31 |
| 22 M110.4a;M110.4b;M110.4c;M110.4e        | ELVDSITDYVGK          | 58 | 1089  | 0.64 | 0.13 | 21 |
| 1 M110.4a;M110.4b;M110.4c;M110.4e         | ELVDSITDYVGK          | 70 | 1405  | 0.64 | 0.13 | 21 |
| 1 M110.4a;M110.4b;M110.4c;M110.4e         | ELVDSITDYVGK          | 40 | 1328  | 0.68 | 0.16 | 24 |
| 22 M110.4a;M110.4b;M110.4c;M110.4e        | ELVDSITDYVGK          | 41 | 962   | 0.71 | 0.32 | 45 |
| 1 M110.4a;M110.4b;M110.4c;M110.4e         | ELVDSITDYVGK          | 21 | 638   | 0.74 | 0.14 | 19 |
| 22 M110.4a;M110.4b;M110.4c;M110.4e        | ELVDSITDYVGK          | 77 | 1987  | 0.76 | 0.10 | 13 |
| 22 M110.4a;M110.4b;M110.4c;M110.4e        | ELVDSITDYVGK          | 61 | 1557  | 0.77 | 0.25 | 32 |
| 1 M110.4a;M110.4b;M110.4c;M110.4e         | ELVDSITDYVGK          | 66 | 1567  | 0.86 | 0.11 | 13 |
| 10 M110.4c;M110.4a;M110.4b;M110.4e        | ELVDSITDYVGK          | 34 | 962   | 0.64 | 0.22 | 34 |
| 10 M110.4c;M110.4a;M110.4b;M110.4e        | FANDVELQQDY PK        | 15 | 1219  | 0.68 | 0.21 | 31 |
| 10 M110.4c;M110.4a;M110.4b;M110.4e        | ELVDSITDYVGK          | 62 | 2005  | 0.69 | 0.12 | 17 |
| 10 M110.4c;M110.4a;M110.4b;M110.4e        | ELVDSITDYVGK          | 57 | 2352  | 0.77 | 0.13 | 17 |
| 10 M110.4c;M110.4a;M110.4b;M110.4e        | ELVDSITDYVGK          | 54 | 2215  | 0.80 | 0.14 | 17 |
| 10 M117.2                                 | VTEQQQELSNEERNLLSVAYK | 37 | 13143 | 0.52 | 0.10 | 20 |
| 10 M117.2                                 | AYQEALDI AK           | 60 | 18060 | 0.53 | 0.10 | 19 |
| 1 M117.2                                  | AYQEALDI AK           | 82 | 23625 | 0.55 | 0.07 | 12 |
| 10 M117.2                                 | VTEQQQELSNEERNLLSVAYK | 18 | 6469  | 0.56 | 0.08 | 15 |
| 10 M117.2                                 | AYQEALDI AK           | 70 | 33341 | 0.56 | 0.07 | 12 |
| 10 M117.2                                 | VTEQQQELSNEERNLLSVAYK | 33 | 10470 | 0.57 | 0.24 | 43 |
| 1 M117.2                                  | AYQEALDI AK           | 65 | 35754 | 0.58 | 0.07 | 12 |
| 10 M117.2                                 | LAEQAERYDDMAAAMK      | 21 | 2035  | 0.60 | 0.13 | 21 |
| 1 M117.2                                  | LAEQAERYDDMAAAMK      | 37 | 7461  | 0.61 | 0.09 | 14 |
| 1 M117.2                                  | LAEQAERYDDMAAAMK      | 19 | 3331  | 0.62 | 0.18 | 29 |
| 1 M117.2                                  | LAEQAERYDDMAAAMK      | 49 | 8941  | 0.62 | 0.11 | 17 |
| 22 M117.2                                 | AYQEALDI AK           | 76 | 9811  | 0.62 | 0.11 | 17 |
| 1 M117.2                                  | VTEQQQELSNEERNLLSVAYK | 38 | 5357  | 0.64 | 0.24 | 38 |
| 7 M117.2                                  | AYQEALDI AK           | 68 | 44751 | 0.64 | 0.07 | 11 |
| 7 M117.2                                  | LAEQAERYDDMAAAMK      | 52 | 5586  | 0.65 | 0.14 | 21 |
| 10 M117.2                                 | LLDEFLIVK             | 31 | 1823  | 0.65 | 0.18 | 28 |
| 7 M117.2                                  | AYQEALDI AK           | 80 | 36088 | 0.66 | 0.09 | 14 |
| 1 M117.2                                  | VTEQQQELSNEERNLLSVAYK | 20 | 2514  | 0.67 | 0.05 | 8  |
| 22 M117.2                                 | LAEQAERYDDMAAAMK      | 46 | 6589  | 0.69 | 0.27 | 38 |
| 10 M117.2                                 | LLDEFLIVK             | 62 | 6214  | 0.71 | 0.13 | 19 |
| 22 M117.2                                 | LAEQAERYDDMAAAMK      | 54 | 6710  | 0.71 | 0.19 | 27 |
| 10 M117.2                                 | VTEQQQELSNEERNLLSVAYK | 21 | 9259  | 0.72 | 0.17 | 23 |
| 1 M117.2                                  | AYQEALDI AK           | 18 | 761   | 0.73 | 0.34 | 47 |
| 1 M117.2                                  | LAEQAERYDDMAAAMK      | 11 | 3290  | 0.73 | 0.10 | 14 |
| 1 M117.2                                  | LAEQAERYDDMAAAMK      | 24 | 1973  | 0.76 | 0.15 | 20 |
| 1 M117.2                                  | VTEQQQELSNEERNLLSVAYK | 15 | 4877  | 0.77 | 0.18 | 24 |
| 1 M117.2                                  | VTEQQQELSNEERNLLSVAYK | 19 | 5460  | 0.77 | 0.12 | 15 |
| 7 M117.2                                  | LAEQAERYDDMAAAMK      | 39 | 2364  | 0.78 | 0.12 | 16 |
| 22 M117.2                                 | LLDEFLIVK             | 53 | 4248  | 0.81 | 0.11 | 13 |
| 7 M117.2                                  | LAEQAERYDDMAAAMK      | 28 | 6789  | 0.82 | 0.18 | 21 |
| 7 M117.2                                  | LAEQAERYDDMAAAMK      | 33 | 2117  | 0.83 | 0.10 | 11 |
| 7 M117.2                                  | LAEQAERYDDMAAAMK      | 37 | 6624  | 0.84 | 0.22 | 26 |
| 7 M117.2                                  | LAEQAERYDDMAAAMK      | 36 | 3768  | 0.86 | 0.15 | 17 |
| 22 M117.2                                 | LAEQAERYDDMAAAMK      | 36 | 3206  | 0.86 | 0.14 | 16 |
| 7 M117.2                                  | LAEQAERYDDMAAAMK      | 39 | 4430  | 0.87 | 0.16 | 18 |
| 7 M117.2                                  | LAEQAERYDDMAAAMK      | 35 | 2315  | 0.88 | 0.15 | 17 |
| 22 M117.2                                 | LAEQAERYDDMAAAMK      | 39 | 4507  | 0.88 | 0.20 | 23 |
| 10 M117.2                                 | LLDEFLIVK             | 56 | 3812  | 0.90 | 0.13 | 14 |
| 7 M117.2                                  | LAEQAERYDDMAAAMK      | 11 | 1162  | 0.93 | 0.17 | 18 |
| 7 M117.2                                  | LAEQAERYDDMAAAMK      | 13 | 3249  | 0.94 | 0.16 | 17 |
| 1 M117.2                                  | LAEQAERYDDMAAAMK      | 23 | 3619  | 0.95 | 0.14 | 15 |
| 7 M117.2                                  | LAEQAERYDDMAAAMK      | 34 | 2331  | 0.96 | 0.14 | 15 |
| 7 M117.2                                  | LAEQAERYDDMAAAMK      | 58 | 10196 | 0.97 | 0.18 | 18 |
| 1 M117.2                                  | LAEQAERYDDMAAAMK      | 23 | 2731  | 0.98 | 0.15 | 15 |
| 1 M117.2                                  | LAEQAERYDDMAAAMK      | 69 | 6873  | 0.99 | 0.11 | 11 |
| 10 M117.2                                 | GDYYRYLAEVASEDRAAVVEK | 20 | 6875  | 1.00 | 0.12 | 12 |
| 10 M117.2                                 | LAEQAERYDDMAAAMK      | 60 | 9734  | 1.01 | 0.09 | 9  |
| 7 M117.2                                  | LAEQAERYDDMAAAMK      | 20 | 2188  | 1.03 | 0.12 | 12 |
| 7 M117.2                                  | LAEQAERYDDMAAAMK      | 18 | 1477  | 1.06 | 0.16 | 15 |
| 7 M117.2                                  | LAEQAERYDDMAAAMK      | 11 | 1921  | 1.09 | 0.32 | 29 |
| 10 M117.2                                 | LAEQAERYDDMAAAMK      | 55 | 8017  | 1.11 | 0.12 | 11 |
| 7 M117.2                                  | LAEQAERYDDMAAAMK      | 35 | 3686  | 1.12 | 0.16 | 14 |
| 10 M117.2                                 | AYQEALDI AK           | 50 | 16038 | 1.14 | 0.19 | 16 |
| 1 M117.2                                  | AYQEALDI AK           | 57 | 8741  | 1.14 | 0.14 | 13 |
| 22 M117.2                                 | AYQEALDI AK           | 25 | 1696  | 1.15 | 0.15 | 13 |
| 1 M117.2                                  | GDYYRYLAEVASEDRAAVVEK | 17 | 1909  | 1.17 | 0.19 | 16 |
| 22 M117.2                                 | LLDEFLIVK             | 47 | 3167  | 1.19 | 0.14 | 11 |
| 1 M117.2                                  | GDYYRYLAEVASEDRAAVVEK | 29 | 3225  | 1.22 | 0.11 | 9  |
| 22 M117.2                                 | AYQEALDI AK           | 58 | 8383  | 1.28 | 0.15 | 12 |
| 7 M117.2                                  | GDYYRYLAEVASEDRAAVVEK | 39 | 7863  | 1.31 | 0.24 | 19 |
| 1 M117.2                                  | LLDEFLIVK             | 66 | 4818  | 1.33 | 0.08 | 6  |
| 7 M117.2                                  | LLDEFLIVK             | 59 | 3508  | 1.58 | 0.14 | 9  |
| 1 M117.2                                  | QAFDDAIAELDTLNEDSYK   | 91 | 2064  | 1.64 | 0.18 | 11 |
| 1 M117.2                                  | LLDEFLIVK             | 55 | 4438  | 1.64 | 0.06 | 4  |
| 22 M117.2                                 | AYQEALDI AK           | 59 | 10136 | 1.67 | 0.13 | 8  |
| 7 M117.2                                  | AYQEALDI AK           | 16 | 2911  | 1.69 | 0.19 | 11 |
| 1 M117.2                                  | QAFDDAIAELDTLNEDSYK   | 82 | 1972  | 1.70 | 0.19 | 11 |
| 22 M117.2                                 | GDYYRYLAEVASEDRAAVVEK | 32 | 9948  | 1.74 | 0.16 | 9  |
| 22 M117.2                                 | GDYYRYLAEVASEDRAAVVEK | 16 | 4930  | 1.81 | 0.26 | 15 |
| 7 M117.2                                  | GDYYRYLAEVASEDRAAVVEK | 21 | 6185  | 1.88 | 0.12 | 6  |
| 10 M117.2                                 | GDYYRYLAEVASEDRAAVVEK | 20 | 8060  | 2.01 | 0.34 | 17 |
| 22 M153.1                                 | LAAYTLLGAAK           | 66 | 2965  | 0.42 | 0.10 | 23 |

|                                       |                  |    |       |      |      |     |
|---------------------------------------|------------------|----|-------|------|------|-----|
| 22 M153.1                             | ALGLNTTHDNAEVVQK | 19 | 6523  | 0.47 | 0.22 | 48  |
| 10 M153.1                             | LAAYTLLGAAK      | 67 | 3843  | 0.51 | 0.05 | 10  |
| 22 M153.1                             | VGLPRDLALK       | 26 | 919   | 0.53 | 0.14 | 27  |
| 10 M153.1                             | ALGLNTTHDNAEVVQK | 14 | 10095 | 0.63 | 0.13 | 20  |
| 7 M153.1                              | LAAYTLLGAAK      | 66 | 6073  | 0.71 | 0.17 | 24  |
| 22 M153.1                             | ALGLNTTHDNAEVVQK | 34 | 9613  | 0.71 | 0.13 | 18  |
| 10 M153.1                             | LAAYTLLGAAK      | 65 | 3546  | 0.71 | 0.20 | 28  |
| 10 M153.1                             | ALGLNTTHDNAEVVQK | 19 | 10538 | 0.71 | 0.10 | 14  |
| 22 M153.1                             | MVLETGIHPAQLK    | 82 | 6621  | 0.72 | 0.13 | 18  |
| 22 M153.1                             | SDVVFLAVKPVHVSK  | 32 | 8800  | 0.72 | 0.13 | 18  |
| 1 M153.1                              | IGFIGAGK         | 13 | 710   | 0.76 | 0.05 | 6   |
| 22 M153.1                             | ALGLNTTHDNAEVVQK | 26 | 7974  | 0.77 | 0.16 | 21  |
| 22 M153.1                             | ALGLNTTHDNAEVVQK | 20 | 8016  | 0.81 | 0.08 | 10  |
| 10 M153.1                             | ALGLNTTHDNAEVVQK | 19 | 10264 | 0.83 | 0.19 | 23  |
| 10 M153.1                             | SDVVFLAVKPVHVSK  | 15 | 10528 | 0.83 | 0.15 | 18  |
| 22 M153.1                             | SDVVFLAVKPVHVSK  | 20 | 6007  | 0.87 | 0.19 | 22  |
| 10 M153.1                             | ALGLNTTHDNAEVVQK | 11 | 10481 | 0.89 | 0.19 | 21  |
| 22 M153.1                             | SDVVFLAVKPVHVSK  | 29 | 6709  | 0.91 | 0.20 | 22  |
| 10 M153.1                             | LAAYTLLGAAK      | 44 | 3893  | 0.93 | 0.07 | 7   |
| 7 M153.1                              | LAAYTLLGAAK      | 70 | 8302  | 0.93 | 0.11 | 12  |
| 1 M153.1                              | VASEIAPALSK      | 14 | 2754  | 0.93 | 0.14 | 15  |
| 7 M153.1                              | MVLETGIHPAQLK    | 66 | 4867  | 0.94 | 0.18 | 19  |
| 1 M153.1                              | SDVVFLAVKPVHVSK  | 11 | 4920  | 0.94 | 0.10 | 11  |
| 7 M153.1                              | MVLETGIHPAQLK    | 43 | 5089  | 0.95 | 0.15 | 15  |
| 10 M153.1                             | VASEIAPALSK      | 23 | 8004  | 0.98 | 0.21 | 21  |
| 22 M153.1                             | MVLETGIHPAQLK    | 85 | 5767  | 1.00 | 0.29 | 29  |
| 1 M153.1                              | VASEIAPALSK      | 23 | 2947  | 1.04 | 0.12 | 12  |
| 22 M153.1                             | VASEIAPALSK      | 43 | 8042  | 1.05 | 0.13 | 13  |
| 10 M153.1                             | SDVVFLAVKPVHVSK  | 20 | 10309 | 1.06 | 0.07 | 7   |
| 7 M153.1                              | LAAYTLLGAAK      | 37 | 3500  | 1.07 | 0.17 | 16  |
| 1 M153.1                              | SDVVFLAVKPVHVSK  | 21 | 5121  | 1.07 | 0.09 | 9   |
| 7 M153.1                              | LAAYTLLGAAK      | 22 | 2584  | 1.09 | 0.21 | 20  |
| 10 M153.1                             | VASEIAPALSK      | 17 | 6636  | 1.12 | 0.12 | 10  |
| 10 M153.1                             | ALGLNTTHDNAEVVQK | 27 | 11844 | 1.14 | 0.20 | 18  |
| 22 M153.1                             | VASEIAPALSK      | 26 | 5454  | 1.14 | 0.21 | 19  |
| 22 M153.1                             | SDVVFLAVKPVHVSK  | 34 | 6521  | 1.16 | 0.17 | 15  |
| 10 M153.1                             | MVLETGIHPAQLK    | 50 | 9296  | 1.16 | 0.05 | 5   |
| 7 M153.1                              | MVLETGIHPAQLK    | 49 | 4120  | 1.19 | 0.14 | 11  |
| 7 M153.1                              | VASEIAPALSK      | 22 | 3841  | 1.20 | 0.25 | 21  |
| 22 M153.1                             | LAAYTLLGAAK      | 27 | 3470  | 1.28 | 0.15 | 12  |
| 10 M153.1                             | MVLETGIHPAQLK    | 65 | 9082  | 1.30 | 0.11 | 9   |
| 10 M153.1                             | MVLETGIHPAQLK    | 79 | 8135  | 1.33 | 0.12 | 9   |
| 1 M153.1                              | MVLETGIHPAQLK    | 72 | 4570  | 1.33 | 0.08 | 6   |
| 10 M153.1                             | MVLETGIHPAQLK    | 88 | 7318  | 1.34 | 0.15 | 11  |
| 7 M153.1                              | MVLETGIHPAQLK    | 59 | 3718  | 1.34 | 0.07 | 5   |
| 1 M153.1                              | LAAYTLLGAAK      | 28 | 2855  | 1.39 | 0.23 | 16  |
| 1 M153.1                              | MVLETGIHPAQLK    | 51 | 3927  | 1.39 | 0.12 | 8   |
| 10 M153.1                             | LAAYTLLGAAK      | 42 | 5116  | 1.40 | 0.19 | 14  |
| 1 M153.1                              | MVLETGIHPAQLK    | 64 | 5614  | 1.41 | 0.13 | 9   |
| 7 M153.1                              | MVLETGIHPAQLK    | 53 | 3969  | 1.45 | 0.12 | 8   |
| 1 M153.1                              | MVLETGIHPAQLK    | 63 | 6763  | 1.58 | 0.15 | 10  |
| 22 M153.1                             | LAAYTLLGAAK      | 48 | 3585  | 1.59 | 0.06 | 4   |
| 1 M153.1                              | LAAYTLLGAAK      | 37 | 3316  | 1.60 | 0.17 | 11  |
| 22 M153.1                             | MVLETGIHPAQLK    | 56 | 5285  | 1.64 | 0.12 | 7   |
| 10 M153.1                             | LAAYTLLGAAK      | 39 | 5180  | 1.77 | 0.15 | 9   |
| 22 M153.1                             | MVLETGIHPAQLK    | 55 | 5298  | 1.93 | 0.10 | 5   |
| 1 M153.1                              | SDVVFLAVKPVHVSK  | 26 | 3088  | 5.39 | 0.40 | 7   |
| 22 M176.2                             | TPWIGLQVANTK     | 20 | 694   | 1.32 | 0.18 | 14  |
| 22 M176.2                             | TPWIGLQVANTK     | 17 | 666   | 1.57 | 0.10 | 6   |
| 10 R01E6.3a                           | ADALNIDYK        | 40 | 6062  | 0.47 | 0.21 | 45  |
| 10 R01E6.3a                           | ATGNATPIAMPK     | 16 | 3525  | 0.64 | 0.13 | 21  |
| 10 R01E6.3a                           | YNDNYHGLIDTVRK   | 18 | 23824 | 0.86 | 0.13 | 15  |
| 10 R01E6.3a                           | YNDNYHGLIDTVRK   | 14 | 30854 | 0.87 | 0.10 | 12  |
| 22 R01E6.3a;R01E6.3b                  | YNDNYHGLIDTVRK   | 12 | 13467 | 0.91 | 0.12 | 13  |
| 7 R01E6.3a;R01E6.3b                   | YNDNYHGLIDTVRK   | 13 | 17572 | 0.98 | 0.15 | 15  |
| 7 R01E6.3a;R01E6.3b                   | ADALNIDYK        | 37 | 3036  | 1.03 | 0.13 | 12  |
| 22 R01E6.3a;R01E6.3b                  | ATGNATPIAMPK     | 25 | 4945  | 1.13 | 0.10 | 9   |
| 7 R01E6.3a;R01E6.3b                   | ADALNIDYK        | 41 | 3864  | 1.16 | 0.20 | 17  |
| 22 R01H2.5                            | TILVTGGTGLVGSAIK | 92 | 2312  | 0.88 | 0.14 | 16  |
| 22 R01H2.5                            | TILVTGGTGLVGSAIK | 89 | 1795  | 1.01 | 0.17 | 16  |
| 10 R01H2.5                            | TILVTGGTGLVGSAIK | 83 | 1950  | 1.16 | 0.11 | 9   |
| 22 R01H2.5                            | TILVTGGTGLVGSAIK | 66 | 1383  | 1.20 | 0.13 | 11  |
| 22 R01H2.5                            | TILVTGGTGLVGSAIK | 75 | 2251  | 1.52 | 0.11 | 7   |
| 22 R01H2.5                            | RMIDVLNK         | 16 | 3239  | 1.67 | 0.16 | 9   |
| 10 R01H2.5                            | TILVTGGTGLVGSAIK | 80 | 1687  | 1.75 | 0.17 | 10  |
| 10 R01H2.5                            | RMIDVLNK         | 11 | 5787  | 1.82 | 0.12 | 7   |
| 10 R02D3.1                            | ELIASLSNQK       | 27 | 2358  | 0.70 | 0.12 | 18  |
| 10 R02D3.1                            | GVLTA LMNPAK     | 20 | 877   | 0.77 | 0.04 | 5   |
| 10 R02D3.1                            | GVLTA LMNPAK     | 23 | 1103  | 0.88 | 0.11 | 12  |
| 10 R02D3.1                            | GVLTA LMNPAK     | 30 | 1192  | 1.08 | 0.20 | 19  |
| 1 R02D3.1                             | GVLTA LMNPAK     | 11 | 603   | 1.09 | 0.16 | 15  |
| 22 R03A10.4a;R03A10.4b                | FVTDLLENLSK      | 39 | 787   | 0.71 | 0.35 | 49  |
| 22 R03A10.4a;R03A10.4b                | FVTDLLENLSK      | 39 | 947   | 0.76 | 0.06 | 8   |
| 22 R03A10.4a;R03A10.4b                | MLVINNPHNPTGK    | 56 | 7999  | 0.81 | 0.08 | 9   |
| 22 R03A10.4a;R03A10.4b                | MLVINNPHNPTGK    | 59 | 6741  | 0.82 | 0.11 | 13  |
| 22 R03A10.4a;R03A10.4b                | MLVINNPHNPTGK    | 61 | 6493  | 0.89 | 0.11 | 12  |
| 22 R03A10.4a;R03A10.4b                | MLVINNPHNPTGK    | 72 | 5650  | 0.96 | 0.05 | 5   |
| 22 R03A10.4a;R03A10.4b                | AVNLGQGFPDSPAPK  | 58 | 3371  | 0.98 | 0.15 | 15  |
| 1 R03D7.6                             | IQAIPQIK         | 16 | 2408  | 0.42 | 0.36 | 86  |
| 1 R03D7.6                             | IQAIPQIK         | 23 | 2178  | 0.45 | 0.22 | 48  |
| 22 R03D7.6                            | DIFLPAFEK        | 10 | 1410  | 0.57 | 0.07 | 13  |
| 22 R03D7.6                            | TAWEEAQVNSLADQYK | 65 | 1779  | 0.60 | 0.17 | 28  |
| 22 R03D7.6                            | DIFLPAFEK        | 11 | 2132  | 0.83 | 0.19 | 23  |
| 1 R03D7.6                             | TAWEEAQVNSLADQYK | 28 | 593   | 1.48 | 0.16 | 11  |
| 1 R03D7.6                             | TAWEEAQVNSLADQYK | 12 | 557   | 1.55 | 0.22 | 14  |
| 1 R03D7.6                             | TAWEEAQVNSLADQYK | 48 | 594   | 1.90 | 0.24 | 13  |
| 1 R03D7.6                             | IQAIPQIK         | 14 | 2938  | 3.37 | 0.40 | 12  |
| 1 R03D7.6                             | IQAIPQIK         | 13 | 2034  | 4.25 | 0.14 | 3   |
| 22 R03G5.1a;F31E3.5;R03G5.1c;R03G5.1b | YYITIIDAPGHRDFIK | 32 | 7433  | 0.26 | 0.30 | 114 |
| 22 R03G5.1a;F31E3.5;R03G5.1c;R03G5.1b | IGYNPK           | 20 | 18393 | 0.46 | 0.06 | 13  |
| 22 R03G5.1a;F31E3.5;R03G5.1c;R03G5.1b | YYITIIDAPGHRDFIK | 28 | 19570 | 0.47 | 0.14 | 29  |

|    |                                    |                          |    |        |      |      |    |
|----|------------------------------------|--------------------------|----|--------|------|------|----|
| 22 | R03G5.1a;F31E3.5;R03G5.1c;R03G5.1b | YYITIIDAPGHRDFIK         | 37 | 20057  | 0.50 | 0.11 | 23 |
| 22 | R03G5.1a;F31E3.5;R03G5.1c;R03G5.1b | YYITIIDAPGHRDFIK         | 48 | 4054   | 0.51 | 0.38 | 74 |
| 22 | R03G5.1a;F31E3.5;R03G5.1c;R03G5.1b | YYITIIDAPGHRDFIK         | 27 | 7912   | 0.54 | 0.15 | 28 |
| 22 | R03G5.1a;F31E3.5;R03G5.1c;R03G5.1b | IGYNPK                   | 22 | 72087  | 0.54 | 0.07 | 13 |
| 22 | R03G5.1a;F31E3.5;R03G5.1c;R03G5.1b | YYITIIDAPGHRDFIK         | 22 | 1676   | 0.54 | 0.12 | 22 |
| 22 | R03G5.1a;F31E3.5;R03G5.1c;R03G5.1b | NGQTRHALLAQTLGVK         | 57 | 192593 | 0.55 | 0.13 | 24 |
| 22 | R03G5.1a;F31E3.5;R03G5.1c;R03G5.1b | YYITIIDAPGHRDFIK         | 30 | 6901   | 0.55 | 0.07 | 12 |
| 22 | R03G5.1a;F31E3.5;R03G5.1c;R03G5.1b | YYITIIDAPGHRDFIK         | 32 | 10837  | 0.55 | 0.15 | 27 |
| 22 | R03G5.1a;F31E3.5;R03G5.1c;R03G5.1b | NGQTRHALLAQTLGVK         | 41 | 24474  | 0.56 | 0.12 | 21 |
| 22 | R03G5.1a;F31E3.5;R03G5.1c;R03G5.1b | GWAVERK                  | 35 | 28065  | 0.58 | 0.14 | 25 |
| 22 | R03G5.1a;F31E3.5;R03G5.1c;R03G5.1b | YYITIIDAPGHRDFIK         | 37 | 19994  | 0.58 | 0.05 | 9  |
| 22 | R03G5.1a;F31E3.5;R03G5.1c;R03G5.1b | GWAVERK                  | 29 | 25336  | 0.60 | 0.05 | 8  |
| 22 | R03G5.1a;F31E3.5;R03G5.1c;R03G5.1b | IGYNPK                   | 14 | 10260  | 0.60 | 0.10 | 17 |
| 22 | R03G5.1a;F31E3.5;R03G5.1c;R03G5.1b | YYITIIDAPGHRDFIK         | 41 | 2882   | 0.60 | 0.22 | 36 |
| 22 | R03G5.1a;F31E3.5;R03G5.1c;R03G5.1b | YYITIIDAPGHRDFIK         | 25 | 7029   | 0.61 | 0.27 | 45 |
| 22 | R03G5.1a;F31E3.5;R03G5.1c;R03G5.1b | STTTGHLIYK               | 36 | 13565  | 0.62 | 0.11 | 18 |
| 22 | R03G5.1a;F31E3.5;R03G5.1c;R03G5.1b | YYITIIDAPGHRDFIK         | 29 | 2875   | 0.63 | 0.13 | 21 |
| 22 | R03G5.1a;F31E3.5;R03G5.1c;R03G5.1b | STTTGHLIYK               | 34 | 9583   | 0.63 | 0.22 | 35 |
| 22 | R03G5.1a;F31E3.5;R03G5.1c;R03G5.1b | YYITIIDAPGHRDFIK         | 43 | 14758  | 0.67 | 0.05 | 8  |
| 22 | R03G5.1a;F31E3.5;R03G5.1c;R03G5.1b | YYITIIDAPGHRDFIK         | 46 | 13615  | 0.67 | 0.19 | 29 |
| 22 | R03G5.1a;F31E3.5;R03G5.1c;R03G5.1b | YYITIIDAPGHRDFIK         | 24 | 20354  | 0.67 | 0.09 | 13 |
| 22 | R03G5.1a;F31E3.5;R03G5.1c;R03G5.1b | NGQTRHALLAQTLGVK         | 53 | 232037 | 0.68 | 0.13 | 19 |
| 22 | R03G5.1a;F31E3.5;R03G5.1c;R03G5.1b | NGQTRHALLAQTLGVK         | 36 | 30439  | 0.68 | 0.22 | 32 |
| 22 | R03G5.1a;F31E3.5;R03G5.1c;R03G5.1b | STTTGHLIYK               | 46 | 12451  | 0.69 | 0.11 | 16 |
| 22 | R03G5.1a;F31E3.5;R03G5.1c;R03G5.1b | IGYNPK                   | 19 | 73049  | 0.70 | 0.32 | 45 |
| 22 | R03G5.1a;F31E3.5;R03G5.1c;R03G5.1b | STTTGHLIYK               | 33 | 1162   | 0.70 | 0.06 | 9  |
| 22 | R03G5.1a;F31E3.5;R03G5.1c;R03G5.1b | YYITIIDAPGHRDFIK         | 17 | 5653   | 0.71 | 0.12 | 17 |
| 22 | R03G5.1a;F31E3.5;R03G5.1c;R03G5.1b | NGQTRHALLAQTLGVK         | 11 | 2908   | 0.71 | 0.37 | 51 |
| 22 | R03G5.1a;F31E3.5;R03G5.1c;R03G5.1b | YYITIIDAPGHRDFIK         | 10 | 2108   | 0.73 | 0.10 | 14 |
| 22 | R03G5.1a;F31E3.5;R03G5.1c;R03G5.1b | YYITIIDAPGHRDFIK         | 23 | 3314   | 0.73 | 0.10 | 14 |
| 22 | R03G5.1a;F31E3.5;R03G5.1c;R03G5.1b | NGQTRHALLAQTLGVK         | 10 | 4947   | 0.74 | 0.16 | 21 |
| 22 | R03G5.1a;F31E3.5;R03G5.1c;R03G5.1b | STTTGHLIYK               | 71 | 9339   | 0.74 | 0.17 | 22 |
| 22 | R03G5.1a;F31E3.5;R03G5.1c;R03G5.1b | YYITIIDAPGHRDFIK         | 19 | 5984   | 0.76 | 0.14 | 18 |
| 22 | R03G5.1a;F31E3.5;R03G5.1c;R03G5.1b | STTTGHLIYK               | 47 | 9004   | 0.77 | 0.25 | 32 |
| 22 | R03G5.1a;F31E3.5;R03G5.1c;R03G5.1b | STTTGHLIYK               | 51 | 1779   | 0.79 | 0.09 | 11 |
| 22 | R03G5.1a;F31E3.5;R03G5.1c;R03G5.1b | YYITIIDAPGHRDFIK         | 51 | 40644  | 0.80 | 0.22 | 28 |
| 22 | R03G5.1a;F31E3.5;R03G5.1c;R03G5.1b | MDSTEPFSEARFTEITNEVSGFIK | 33 | 4384   | 0.80 | 0.28 | 35 |
| 22 | R03G5.1a;F31E3.5;R03G5.1c;R03G5.1b | STTTGHLIYK               | 66 | 193535 | 0.82 | 0.05 | 6  |
| 22 | R03G5.1a;F31E3.5;R03G5.1c;R03G5.1b | YYITIIDAPGHRDFIK         | 28 | 4266   | 0.83 | 0.17 | 20 |
| 22 | R03G5.1a;F31E3.5;R03G5.1c;R03G5.1b | NGQTRHALLAQTLGVK         | 43 | 25584  | 0.83 | 0.13 | 15 |
| 22 | R03G5.1a;F31E3.5;R03G5.1c;R03G5.1b | STTTGHLIYK               | 47 | 8863   | 0.84 | 0.15 | 18 |
| 22 | R03G5.1a;F31E3.5;R03G5.1c;R03G5.1b | NGQTRHALLAQTLGVK         | 45 | 12161  | 0.85 | 0.14 | 17 |
| 22 | R03G5.1a;F31E3.5;R03G5.1c;R03G5.1b | NGQTRHALLAQTLGVK         | 15 | 3949   | 0.88 | 0.21 | 24 |
| 22 | R03G5.1a;F31E3.5;R03G5.1c;R03G5.1b | STTTGHLIYK               | 62 | 46130  | 0.88 | 0.10 | 11 |
| 22 | R03G5.1a;F31E3.5;R03G5.1c;R03G5.1b | NGQTRHALLAQTLGVK         | 42 | 11112  | 0.89 | 0.15 | 17 |
| 22 | R03G5.1a;F31E3.5;R03G5.1c;R03G5.1b | GWAVERK                  | 41 | 211335 | 0.90 | 0.11 | 13 |
| 22 | R03G5.1a;F31E3.5;R03G5.1c;R03G5.1b | GWAVERK                  | 16 | 15082  | 0.91 | 0.04 | 5  |
| 22 | R03G5.1a;F31E3.5;R03G5.1c;R03G5.1b | STTTGHLIYK               | 27 | 19116  | 0.91 | 0.09 | 9  |
| 22 | R03G5.1a;F31E3.5;R03G5.1c;R03G5.1b | NGQTRHALLAQTLGVK         | 82 | 63960  | 0.92 | 0.17 | 18 |
| 22 | R03G5.1a;F31E3.5;R03G5.1c;R03G5.1b | GWAVERK                  | 12 | 6153   | 0.92 | 0.21 | 23 |
| 22 | R03G5.1a;F31E3.5;R03G5.1c;R03G5.1b | QLIVACNK                 | 15 | 7369   | 0.93 | 0.23 | 25 |
| 22 | R03G5.1a;F31E3.5;R03G5.1c;R03G5.1b | GWAVERK                  | 36 | 136581 | 0.94 | 0.08 | 8  |
| 22 | R03G5.1a;F31E3.5;R03G5.1c;R03G5.1b | NGQTRHALLAQTLGVK         | 41 | 6852   | 0.94 | 0.16 | 17 |
| 22 | R03G5.1a;F31E3.5;R03G5.1c;R03G5.1b | GWAVERK                  | 37 | 106178 | 0.95 | 0.10 | 11 |
| 22 | R03G5.1a;F31E3.5;R03G5.1c;R03G5.1b | YYITIIDAPGHRDFIK         | 39 | 15405  | 0.95 | 0.16 | 17 |
| 22 | R03G5.1a;F31E3.5;R03G5.1c;R03G5.1b | QLIVACNK                 | 31 | 3623   | 0.95 | 0.17 | 18 |
| 22 | R03G5.1a;F31E3.5;R03G5.1c;R03G5.1b | GWAVERK                  | 15 | 10778  | 0.95 | 0.11 | 11 |
| 22 | R03G5.1a;F31E3.5;R03G5.1c;R03G5.1b | YYITIIDAPGHRDFIK         | 41 | 26321  | 0.96 | 0.09 | 10 |
| 22 | R03G5.1a;F31E3.5;R03G5.1c;R03G5.1b | GWAVERK                  | 39 | 126114 | 0.97 | 0.06 | 6  |
| 22 | R03G5.1a;F31E3.5;R03G5.1c;R03G5.1b | NGQTRHALLAQTLGVK         | 41 | 3658   | 0.97 | 0.27 | 28 |
| 22 | R03G5.1a;F31E3.5;R03G5.1c;R03G5.1b | MDSTEPFSEARFTEITNEVSGFIK | 48 | 4548   | 0.98 | 0.12 | 12 |
| 22 | R03G5.1a;F31E3.5;R03G5.1c;R03G5.1b | STTTGHLIYK               | 45 | 33279  | 0.99 | 0.16 | 16 |
| 22 | R03G5.1a;F31E3.5;R03G5.1c;R03G5.1b | STTTGHLIYK               | 55 | 162750 | 0.99 | 0.07 | 7  |
| 22 | R03G5.1a;F31E3.5;R03G5.1c;R03G5.1b | STTTGHLIYK               | 23 | 16965  | 1.00 | 0.06 | 6  |
| 22 | R03G5.1a;F31E3.5;R03G5.1c;R03G5.1b | NGQTRHALLAQTLGVK         | 52 | 8306   | 1.00 | 0.16 | 16 |
| 22 | R03G5.1a;F31E3.5;R03G5.1c;R03G5.1b | GWAVERK                  | 35 | 103219 | 1.00 | 0.07 | 7  |
| 22 | R03G5.1a;F31E3.5;R03G5.1c;R03G5.1b | YYITIIDAPGHRDFIK         | 38 | 12277  | 1.02 | 0.12 | 12 |
| 22 | R03G5.1a;F31E3.5;R03G5.1c;R03G5.1b | STTTGHLIYK               | 72 | 109930 | 1.02 | 0.09 | 9  |
| 22 | R03G5.1a;F31E3.5;R03G5.1c;R03G5.1b | NGQTRHALLAQTLGVK         | 58 | 7447   | 1.03 | 0.12 | 12 |
| 22 | R03G5.1a;F31E3.5;R03G5.1c;R03G5.1b | STTTGHLIYK               | 51 | 37407  | 1.04 | 0.07 | 7  |
| 22 | R03G5.1a;F31E3.5;R03G5.1c;R03G5.1b | STTTGHLIYK               | 57 | 426557 | 1.04 | 0.13 | 13 |
| 22 | R03G5.1a;F31E3.5;R03G5.1c;R03G5.1b | STTTGHLIYK               | 66 | 62972  | 1.04 | 0.09 | 9  |
| 22 | R03G5.1a;F31E3.5;R03G5.1c;R03G5.1b | NGQTRHALLAQTLGVK         | 66 | 46724  | 1.05 | 0.15 | 14 |
| 22 | R03G5.1a;F31E3.5;R03G5.1c;R03G5.1b | YYITIIDAPGHRDFIK         | 24 | 5970   | 1.05 | 0.09 | 9  |
| 22 | R03G5.1a;F31E3.5;R03G5.1c;R03G5.1b | NGQTRHALLAQTLGVK         | 61 | 2683   | 1.07 | 0.23 | 21 |
| 22 | R03G5.1a;F31E3.5;R03G5.1c;R03G5.1b | NGQTRHALLAQTLGVK         | 52 | 1999   | 1.11 | 0.22 | 20 |
| 22 | R03G5.1a;F31E3.5;R03G5.1c;R03G5.1b | STTTGHLIYK               | 38 | 5957   | 1.12 | 0.21 | 19 |
| 22 | R03G5.1a;F31E3.5;R03G5.1c;R03G5.1b | QLIVACNK                 | 16 | 7412   | 1.12 | 0.24 | 21 |
| 22 | R03G5.1a;F31E3.5;R03G5.1c;R03G5.1b | STTTGHLIYK               | 35 | 3266   | 1.13 | 0.08 | 7  |
| 22 | R03G5.1a;F31E3.5;R03G5.1c;R03G5.1b | GWAVERK                  | 28 | 218111 | 1.13 | 0.11 | 10 |
| 22 | R03G5.1a;F31E3.5;R03G5.1c;R03G5.1b | GWAVERK                  | 17 | 5766   | 1.15 | 0.07 | 6  |
| 22 | R03G5.1a;F31E3.5;R03G5.1c;R03G5.1b | NGQTRHALLAQTLGVK         | 42 | 14811  | 1.17 | 0.12 | 10 |
| 22 | R03G5.1a;F31E3.5;R03G5.1c;R03G5.1b | QLIVACNK                 | 21 | 4945   | 1.18 | 0.22 | 19 |
| 22 | R03G5.1a;F31E3.5;R03G5.1c;R03G5.1b | STTTGHLIYK               | 61 | 99914  | 1.19 | 0.10 | 8  |
| 22 | R03G5.1a;F31E3.5;R03G5.1c;R03G5.1b | STTTGHLIYK               | 70 | 488723 | 1.19 | 0.10 | 8  |
| 22 | R03G5.1a;F31E3.5;R03G5.1c;R03G5.1b | YYITIIDAPGHRDFIK         | 28 | 4957   | 1.19 | 0.25 | 21 |
| 22 | R03G5.1a;F31E3.5;R03G5.1c;R03G5.1b | STTTGHLIYK               | 45 | 4619   | 1.19 | 0.08 | 7  |
| 22 | R03G5.1a;F31E3.5;R03G5.1c;R03G5.1b | GWAVERK                  | 21 | 3905   | 1.24 | 0.15 | 12 |
| 22 | R03G5.1a;F31E3.5;R03G5.1c;R03G5.1b | STTTGHLIYK               | 51 | 7648   | 1.25 | 0.11 | 9  |
| 22 | R03G5.1a;F31E3.5;R03G5.1c;R03G5.1b | STTTGHLIYK               | 51 | 5190   | 1.25 | 0.12 | 9  |
| 22 | R03G5.1a;F31E3.5;R03G5.1c;R03G5.1b | YYITIIDAPGHRDFIK         | 19 | 3301   | 1.27 | 0.16 | 13 |
| 22 | R03G5.1a;F31E3.5;R03G5.1c;R03G5.1b | QLIVACNK                 | 14 | 1405   | 1.30 | 0.20 | 15 |
| 22 | R03G5.1a;F31E3.5;R03G5.1c;R03G5.1b | STTTGHLIYK               | 24 | 6599   | 1.31 | 0.16 | 12 |
| 22 | R03G5.1a;F31E3.5;R03G5.1c;R03G5.1b | NGQTRHALLAQTLGVK         | 19 | 15080  | 1.32 | 0.11 | 9  |
| 22 | R03G5.1a;F31E3.5;R03G5.1c;R03G5.1b | STTTGHLIYK               | 56 | 27106  | 1.33 | 0.11 | 8  |
| 22 | R03G5.1a;F31E3.5;R03G5.1c;R03G5.1b | YYITIIDAPGHRDFIK         | 32 | 19391  | 1.35 | 0.04 | 3  |
| 22 | R03G5.1a;F31E3.5;R03G5.1c;R03G5.1b | STTTGHLIYK               | 26 | 7116   | 1.35 | 0.07 | 5  |
| 22 | R03G5.1a;F31E3.5;R03G5.1c;R03G5.1b | GWAVERK                  | 12 | 6480   | 1.38 | 0.11 | 8  |
| 22 | R03G5.1a;F31E3.5;R03G5.1c;R03G5.1b | STTTGHLIYK               | 64 | 25555  | 1.38 | 0.17 | 12 |
| 22 | R03G5.1a;F31E3.5;R03G5.1c;R03G5.1b | NGQTRHALLAQTLGVK         | 65 | 23283  | 1.45 | 0.15 | 11 |
| 22 | R03G5.1a;F31E3.5;R03G5.1c;R03G5.1b | GWAVERK                  | 11 | 4737   | 1.54 | 0.13 | 8  |

|    |                                             |                            |    |        |      |      |      |
|----|---------------------------------------------|----------------------------|----|--------|------|------|------|
| 22 | R03G5.1a;F31E3.5;R03G5.1c;R03G5.1b          | QLIVACNK                   | 27 | 3189   | 1.55 | 0.18 | 12   |
| 22 | R03G5.1a;F31E3.5;R03G5.1c;R03G5.1b          | NGQTREHALLAQTLGVK          | 50 | 5003   | 1.57 | 0.30 | 19   |
| 22 | R03G5.1a;F31E3.5;R03G5.1c;R03G5.1b          | STTTGHLIYK                 | 25 | 3219   | 1.57 | 0.08 | 5    |
| 22 | R03G5.1a;F31E3.5;R03G5.1c;R03G5.1b          | STTTGHLIYK                 | 25 | 7103   | 1.59 | 0.44 | 28   |
| 22 | R03G5.1a;F31E3.5;R03G5.1c;R03G5.1b          | STTTGHLIYK                 | 44 | 4035   | 1.65 | 0.14 | 9    |
| 22 | R03G5.1a;F31E3.5;R03G5.1c;R03G5.1b          | STTTGHLIYK                 | 57 | 12570  | 1.66 | 0.08 | 5    |
| 22 | R03G5.1a;F31E3.5;R03G5.1c;R03G5.1b          | STTTGHLIYK                 | 10 | 573    | 1.66 | 0.11 | 7    |
| 22 | R03G5.1a;F31E3.5;R03G5.1c;R03G5.1b          | NGQTREHALLAQTLGVK          | 43 | 12979  | 1.69 | 0.11 | 6    |
| 22 | R03G5.1a;F31E3.5;R03G5.1c;R03G5.1b          | GWAVERK                    | 16 | 9868   | 1.79 | 0.12 | 6    |
| 22 | R03G5.1a;F31E3.5;R03G5.1c;R03G5.1b          | GWAVERK                    | 33 | 46025  | 1.82 | 0.06 | 3    |
| 22 | R03G5.1a;F31E3.5;R03G5.1c;R03G5.1b          | STTTGHLIYK                 | 67 | 14553  | 1.83 | 0.13 | 7    |
| 22 | R03G5.1a;F31E3.5;R03G5.1c;R03G5.1b          | YYITIIDAPGHRDFIK           | 35 | 22500  | 1.87 | 0.12 | 7    |
| 22 | R03G5.1a;F31E3.5;R03G5.1c;R03G5.1b          | GWAVERK                    | 28 | 34887  | 1.90 | 0.07 | 3    |
| 22 | R03G5.1a;F31E3.5;R03G5.1c;R03G5.1b          | STTTGHLIYK                 | 61 | 6139   | 1.90 | 0.12 | 6    |
| 22 | R03G5.1a;F31E3.5;R03G5.1c;R03G5.1b          | GWAVERK                    | 29 | 8983   | 1.92 | 0.08 | 4    |
| 22 | R03G5.1a;F31E3.5;R03G5.1c;R03G5.1b          | GWAVERK                    | 14 | 9953   | 1.96 | 0.08 | 4    |
| 22 | R03G5.1a;F31E3.5;R03G5.1c;R03G5.1b          | AVPFVPISGFNGDNMLEVSSNMPWFK | 13 | 2061   | 2.01 | 0.21 | 10   |
| 22 | R03G5.1a;F31E3.5;R03G5.1c;R03G5.1b          | GWAVERK                    | 33 | 5984   | 2.03 | 0.04 | 2    |
| 22 | R03G5.1a;F31E3.5;R03G5.1c;R03G5.1b          | STTTGHLIYK                 | 33 | 3283   | 2.07 | 0.11 | 5    |
| 22 | R03G5.1a;F31E3.5;R03G5.1c;R03G5.1b          | GWAVERK                    | 12 | 8567   | 2.08 | 0.09 | 4    |
| 22 | R03G5.1a;F31E3.5;R03G5.1c;R03G5.1b          | STTTGHLIYK                 | 56 | 12644  | 2.12 | 0.10 | 5    |
| 22 | R03G5.1a;F31E3.5;R03G5.1c;R03G5.1b          | YYITIIDAPGHRDFIK           | 34 | 9445   | 2.12 | 0.06 | 3    |
| 22 | R03G5.1a;F31E3.5;R03G5.1c;R03G5.1b          | STTTGHLIYK                 | 49 | 8351   | 2.16 | 0.13 | 6    |
| 22 | R03G5.1a;F31E3.5;R03G5.1c;R03G5.1b          | STTTGHLIYK                 | 63 | 8601   | 2.18 | 0.09 | 4    |
| 22 | R03G5.1a;F31E3.5;R03G5.1c;R03G5.1b          | GWAVERK                    | 12 | 9935   | 2.19 | 0.13 | 6    |
| 22 | R03G5.1a;F31E3.5;R03G5.1c;R03G5.1b          | STTTGHLIYK                 | 58 | 12148  | 2.20 | 0.05 | 2    |
| 22 | R03G5.1a;F31E3.5;R03G5.1c;R03G5.1b          | QLIVACNK                   | 12 | 4748   | 2.28 | 0.09 | 4    |
| 22 | R03G5.1a;F31E3.5;R03G5.1c;R03G5.1b          | GWAVERK                    | 13 | 9109   | 2.33 | 0.07 | 3    |
| 22 | R03G5.1a;F31E3.5;R03G5.1c;R03G5.1b          | STTTGHLIYK                 | 42 | 6841   | 2.39 | 0.10 | 4    |
| 22 | R03G5.1a;F31E3.5;R03G5.1c;R03G5.1b          | GWAVERK                    | 14 | 6468   | 2.40 | 0.11 | 4    |
| 22 | R03G5.1a;F31E3.5;R03G5.1c;R03G5.1b          | STTTGHLIYK                 | 48 | 11514  | 2.44 | 0.08 | 3    |
| 22 | R03G5.1a;F31E3.5;R03G5.1c;R03G5.1b          | STTTGHLIYK                 | 46 | 4989   | 2.50 | 0.11 | 4    |
| 22 | R03G5.1a;F31E3.5;R03G5.1c;R03G5.1b          | GWAVERK                    | 12 | 3109   | 5.66 | 0.38 | 7    |
| 7  | R03G5.1a;F31E3.5;R03G5.1c;R03G5.1d;R03G5.1b | STTTGHLIYK                 | 55 | 7919   | 0.05 | 0.60 | 1307 |
| 7  | R03G5.1a;F31E3.5;R03G5.1c;R03G5.1d;R03G5.1b | STTTGHLIYK                 | 37 | 1969   | 0.11 | 0.24 | 231  |
| 7  | R03G5.1a;F31E3.5;R03G5.1c;R03G5.1d;R03G5.1b | GWAVERK                    | 17 | 1340   | 0.26 | 0.42 | 164  |
| 7  | R03G5.1a;F31E3.5;R03G5.1c;R03G5.1d;R03G5.1b | QLIVACNK                   | 16 | 1089   | 0.26 | 0.25 | 94   |
| 7  | R03G5.1a;F31E3.5;R03G5.1c;R03G5.1d;R03G5.1b | YYITIIDAPGHRDFIK           | 19 | 4591   | 0.40 | 0.09 | 23   |
| 7  | R03G5.1a;F31E3.5;R03G5.1c;R03G5.1d;R03G5.1b | YYITIIDAPGHRDFIK           | 28 | 9546   | 0.64 | 0.16 | 25   |
| 7  | R03G5.1a;F31E3.5;R03G5.1c;R03G5.1d;R03G5.1b | GWAVERK                    | 32 | 45447  | 0.65 | 0.05 | 7    |
| 7  | R03G5.1a;F31E3.5;R03G5.1c;R03G5.1d;R03G5.1b | IGYNPK                     | 21 | 30256  | 0.67 | 0.06 | 9    |
| 7  | R03G5.1a;F31E3.5;R03G5.1c;R03G5.1d;R03G5.1b | GWAVERK                    | 30 | 41776  | 0.67 | 0.08 | 12   |
| 7  | R03G5.1a;F31E3.5;R03G5.1c;R03G5.1d;R03G5.1b | YYITIIDAPGHRDFIK           | 15 | 39675  | 0.68 | 0.15 | 21   |
| 7  | R03G5.1a;F31E3.5;R03G5.1c;R03G5.1d;R03G5.1b | STTTGHLIYK                 | 54 | 57251  | 0.70 | 0.10 | 14   |
| 7  | R03G5.1a;F31E3.5;R03G5.1c;R03G5.1d;R03G5.1b | NGQTREHALLAQTLGVK          | 12 | 2684   | 0.71 | 0.08 | 12   |
| 7  | R03G5.1a;F31E3.5;R03G5.1c;R03G5.1d;R03G5.1b | YYITIIDAPGHRDFIK           | 18 | 3004   | 0.72 | 0.12 | 17   |
| 7  | R03G5.1a;F31E3.5;R03G5.1c;R03G5.1d;R03G5.1b | GWAVERK                    | 21 | 6120   | 0.72 | 0.08 | 12   |
| 7  | R03G5.1a;F31E3.5;R03G5.1c;R03G5.1d;R03G5.1b | YYITIIDAPGHRDFIK           | 21 | 3609   | 0.72 | 0.16 | 22   |
| 7  | R03G5.1a;F31E3.5;R03G5.1c;R03G5.1d;R03G5.1b | YYITIIDAPGHRDFIK           | 23 | 7573   | 0.74 | 0.12 | 16   |
| 7  | R03G5.1a;F31E3.5;R03G5.1c;R03G5.1d;R03G5.1b | STTTGHLIYK                 | 75 | 33042  | 0.75 | 0.09 | 12   |
| 7  | R03G5.1a;F31E3.5;R03G5.1c;R03G5.1d;R03G5.1b | STTTGHLIYK                 | 55 | 4628   | 0.77 | 0.18 | 24   |
| 7  | R03G5.1a;F31E3.5;R03G5.1c;R03G5.1d;R03G5.1b | YYITIIDAPGHRDFIK           | 24 | 9062   | 0.77 | 0.13 | 16   |
| 7  | R03G5.1a;F31E3.5;R03G5.1c;R03G5.1d;R03G5.1b | STTTGHLIYK                 | 59 | 68637  | 0.77 | 0.12 | 16   |
| 7  | R03G5.1a;F31E3.5;R03G5.1c;R03G5.1d;R03G5.1b | NGQTREHALLAQTLGVK          | 54 | 19141  | 0.78 | 0.13 | 17   |
| 7  | R03G5.1a;F31E3.5;R03G5.1c;R03G5.1d;R03G5.1b | STTTGHLIYK                 | 49 | 54135  | 0.79 | 0.12 | 16   |
| 7  | R03G5.1a;F31E3.5;R03G5.1c;R03G5.1d;R03G5.1b | NGQTREHALLAQTLGVK          | 20 | 5694   | 0.81 | 0.25 | 31   |
| 7  | R03G5.1a;F31E3.5;R03G5.1c;R03G5.1d;R03G5.1b | NGQTREHALLAQTLGVK          | 67 | 12026  | 0.81 | 0.15 | 19   |
| 7  | R03G5.1a;F31E3.5;R03G5.1c;R03G5.1d;R03G5.1b | GWAVERK                    | 13 | 18373  | 0.82 | 0.14 | 17   |
| 7  | R03G5.1a;F31E3.5;R03G5.1c;R03G5.1d;R03G5.1b | YYITIIDAPGHRDFIK           | 26 | 4665   | 0.83 | 0.09 | 10   |
| 7  | R03G5.1a;F31E3.5;R03G5.1c;R03G5.1d;R03G5.1b | STTTGHLIYK                 | 44 | 5720   | 0.83 | 0.32 | 38   |
| 7  | R03G5.1a;F31E3.5;R03G5.1c;R03G5.1d;R03G5.1b | GWAVERK                    | 24 | 15918  | 0.88 | 0.16 | 19   |
| 7  | R03G5.1a;F31E3.5;R03G5.1c;R03G5.1d;R03G5.1b | NGQTREHALLAQTLGVK          | 25 | 8041   | 0.88 | 0.22 | 25   |
| 7  | R03G5.1a;F31E3.5;R03G5.1c;R03G5.1d;R03G5.1b | YYITIIDAPGHRDFIK           | 23 | 4424   | 0.89 | 0.19 | 21   |
| 7  | R03G5.1a;F31E3.5;R03G5.1c;R03G5.1d;R03G5.1b | STTTGHLIYK                 | 36 | 3246   | 0.89 | 0.11 | 13   |
| 7  | R03G5.1a;F31E3.5;R03G5.1c;R03G5.1d;R03G5.1b | YYITIIDAPGHRDFIK           | 32 | 62060  | 0.89 | 0.09 | 10   |
| 7  | R03G5.1a;F31E3.5;R03G5.1c;R03G5.1d;R03G5.1b | YYITIIDAPGHRDFIK           | 16 | 9074   | 0.92 | 0.19 | 21   |
| 7  | R03G5.1a;F31E3.5;R03G5.1c;R03G5.1d;R03G5.1b | IGYNPK                     | 21 | 28058  | 0.92 | 0.18 | 20   |
| 7  | R03G5.1a;F31E3.5;R03G5.1c;R03G5.1d;R03G5.1b | YYITIIDAPGHRDFIK           | 25 | 6310   | 0.94 | 0.25 | 27   |
| 7  | R03G5.1a;F31E3.5;R03G5.1c;R03G5.1d;R03G5.1b | NGQTREHALLAQTLGVK          | 26 | 12738  | 0.96 | 0.23 | 24   |
| 7  | R03G5.1a;F31E3.5;R03G5.1c;R03G5.1d;R03G5.1b | GWAVERK                    | 30 | 16578  | 0.96 | 0.11 | 11   |
| 7  | R03G5.1a;F31E3.5;R03G5.1c;R03G5.1d;R03G5.1b | QLIVACNK                   | 19 | 5967   | 0.97 | 0.23 | 24   |
| 7  | R03G5.1a;F31E3.5;R03G5.1c;R03G5.1d;R03G5.1b | GWAVERK                    | 13 | 14087  | 0.97 | 0.11 | 11   |
| 7  | R03G5.1a;F31E3.5;R03G5.1c;R03G5.1d;R03G5.1b | GWAVERK                    | 11 | 1785   | 1.00 | 0.14 | 14   |
| 7  | R03G5.1a;F31E3.5;R03G5.1c;R03G5.1d;R03G5.1b | NGQTREHALLAQTLGVK          | 27 | 13433  | 1.02 | 0.16 | 16   |
| 7  | R03G5.1a;F31E3.5;R03G5.1c;R03G5.1d;R03G5.1b | GWAVERK                    | 11 | 6598   | 1.02 | 0.09 | 8    |
| 7  | R03G5.1a;F31E3.5;R03G5.1c;R03G5.1d;R03G5.1b | NGQTREHALLAQTLGVK          | 27 | 5289   | 1.03 | 0.09 | 9    |
| 7  | R03G5.1a;F31E3.5;R03G5.1c;R03G5.1d;R03G5.1b | STTTGHLIYK                 | 69 | 371904 | 1.05 | 0.11 | 10   |
| 7  | R03G5.1a;F31E3.5;R03G5.1c;R03G5.1d;R03G5.1b | STTTGHLIYK                 | 55 | 50333  | 1.05 | 0.08 | 8    |
| 7  | R03G5.1a;F31E3.5;R03G5.1c;R03G5.1d;R03G5.1b | YYITIIDAPGHRDFIK           | 12 | 16800  | 1.06 | 0.14 | 13   |
| 7  | R03G5.1a;F31E3.5;R03G5.1c;R03G5.1d;R03G5.1b | QLIVACNK                   | 22 | 12145  | 1.07 | 0.24 | 22   |
| 7  | R03G5.1a;F31E3.5;R03G5.1c;R03G5.1d;R03G5.1b | NGQTREHALLAQTLGVK          | 22 | 15697  | 1.08 | 0.16 | 15   |
| 7  | R03G5.1a;F31E3.5;R03G5.1c;R03G5.1d;R03G5.1b | STTTGHLIYK                 | 28 | 4056   | 1.11 | 0.11 | 10   |
| 7  | R03G5.1a;F31E3.5;R03G5.1c;R03G5.1d;R03G5.1b | STTTGHLIYK                 | 60 | 384280 | 1.12 | 0.10 | 9    |
| 7  | R03G5.1a;F31E3.5;R03G5.1c;R03G5.1d;R03G5.1b | STTTGHLIYK                 | 35 | 2167   | 1.13 | 0.12 | 11   |
| 7  | R03G5.1a;F31E3.5;R03G5.1c;R03G5.1d;R03G5.1b | QLIVACNK                   | 14 | 3162   | 1.14 | 0.31 | 27   |
| 7  | R03G5.1a;F31E3.5;R03G5.1c;R03G5.1d;R03G5.1b | NGQTREHALLAQTLGVK          | 29 | 10172  | 1.14 | 0.17 | 15   |
| 7  | R03G5.1a;F31E3.5;R03G5.1c;R03G5.1d;R03G5.1b | GWAVERK                    | 11 | 7036   | 1.16 | 0.13 | 11   |
| 7  | R03G5.1a;F31E3.5;R03G5.1c;R03G5.1d;R03G5.1b | STTTGHLIYK                 | 21 | 2476   | 1.17 | 0.08 | 7    |
| 7  | R03G5.1a;F31E3.5;R03G5.1c;R03G5.1d;R03G5.1b | STTTGHLIYK                 | 19 | 780    | 1.17 | 0.12 | 10   |
| 7  | R03G5.1a;F31E3.5;R03G5.1c;R03G5.1d;R03G5.1b | STTTGHLIYK                 | 40 | 6978   | 1.19 | 0.16 | 13   |
| 7  | R03G5.1a;F31E3.5;R03G5.1c;R03G5.1d;R03G5.1b | STTTGHLIYK                 | 27 | 3612   | 1.22 | 0.09 | 7    |
| 7  | R03G5.1a;F31E3.5;R03G5.1c;R03G5.1d;R03G5.1b | STTTGHLIYK                 | 69 | 99387  | 1.22 | 0.10 | 8    |
| 7  | R03G5.1a;F31E3.5;R03G5.1c;R03G5.1d;R03G5.1b | STTTGHLIYK                 | 30 | 8862   | 1.24 | 0.21 | 17   |
| 7  | R03G5.1a;F31E3.5;R03G5.1c;R03G5.1d;R03G5.1b | STTTGHLIYK                 | 53 | 7668   | 1.30 | 0.12 | 9    |
| 7  | R03G5.1a;F31E3.5;R03G5.1c;R03G5.1d;R03G5.1b | STTTGHLIYK                 | 15 | 3296   | 1.32 | 0.20 | 15   |
| 7  | R03G5.1a;F31E3.5;R03G5.1c;R03G5.1d;R03G5.1b | STTTGHLIYK                 | 18 | 2112   | 1.35 | 0.35 | 26   |
| 7  | R03G5.1a;F31E3.5;R03G5.1c;R03G5.1d;R03G5.1b | QLIVACNK                   | 11 | 6195   | 1.36 | 0.20 | 15   |
| 7  | R03G5.1a;F31E3.5;R03G5.1c;R03G5.1d;R03G5.1b | STTTGHLIYK                 | 42 | 10895  | 1.38 | 0.09 | 6    |
| 7  | R03G5.1a;F31E3.5;R03G5.1c;R03G5.1d;R03G5.1b | STTTGHLIYK                 | 28 | 4948   | 1.39 | 0.22 | 16   |
| 7  | R03G5.1a;F31E3.5;R03G5.1c;R03G5.1d;R03G5.1b | GWAVERK                    | 42 | 89653  | 1.39 | 0.13 | 9    |
| 7  | R03G5.1a;F31E3.5;R03G5.1c;R03G5.1d;R03G5.1b | STTTGHLIYK                 | 13 | 1673   | 1.41 | 0.11 | 8    |

|    |                                             |                          |    |        |       |      |     |
|----|---------------------------------------------|--------------------------|----|--------|-------|------|-----|
| 7  | R03G5.1a;F31E3.5;R03G5.1c;R03G5.1d;R03G5.1b | STTTGHLIYK               | 22 | 590    | 1.41  | 0.23 | 16  |
| 7  | R03G5.1a;F31E3.5;R03G5.1c;R03G5.1d;R03G5.1b | NGQTREHALLAQTLGVK        | 11 | 4777   | 1.42  | 0.09 | 6   |
| 7  | R03G5.1a;F31E3.5;R03G5.1c;R03G5.1d;R03G5.1b | STTTGHLIYK               | 43 | 5298   | 1.45  | 0.08 | 5   |
| 7  | R03G5.1a;F31E3.5;R03G5.1c;R03G5.1d;R03G5.1b | STTTGHLIYK               | 22 | 1535   | 1.48  | 0.06 | 4   |
| 7  | R03G5.1a;F31E3.5;R03G5.1c;R03G5.1d;R03G5.1b | NGQTREHALLAQTLGVK        | 27 | 7839   | 1.49  | 0.12 | 8   |
| 7  | R03G5.1a;F31E3.5;R03G5.1c;R03G5.1d;R03G5.1b | GWAVERK                  | 32 | 79573  | 1.51  | 0.14 | 9   |
| 7  | R03G5.1a;F31E3.5;R03G5.1c;R03G5.1d;R03G5.1b | STTTGHLIYK               | 50 | 4577   | 1.52  | 0.14 | 10  |
| 7  | R03G5.1a;F31E3.5;R03G5.1c;R03G5.1d;R03G5.1b | STTTGHLIYK               | 32 | 760    | 1.53  | 0.10 | 6   |
| 7  | R03G5.1a;F31E3.5;R03G5.1c;R03G5.1d;R03G5.1b | QLIVACNK                 | 33 | 6889   | 1.54  | 0.15 | 10  |
| 7  | R03G5.1a;F31E3.5;R03G5.1c;R03G5.1d;R03G5.1b | STTTGHLIYK               | 24 | 1929   | 1.57  | 0.13 | 9   |
| 7  | R03G5.1a;F31E3.5;R03G5.1c;R03G5.1d;R03G5.1b | GWAVERK                  | 13 | 3685   | 1.57  | 0.10 | 6   |
| 7  | R03G5.1a;F31E3.5;R03G5.1c;R03G5.1d;R03G5.1b | GWAVERK                  | 11 | 2198   | 1.58  | 0.11 | 7   |
| 7  | R03G5.1a;F31E3.5;R03G5.1c;R03G5.1d;R03G5.1b | YYITIIDAPGHRDFIK         | 25 | 10573  | 1.59  | 0.31 | 20  |
| 7  | R03G5.1a;F31E3.5;R03G5.1c;R03G5.1d;R03G5.1b | STTTGHLIYK               | 44 | 4873   | 1.59  | 0.15 | 10  |
| 7  | R03G5.1a;F31E3.5;R03G5.1c;R03G5.1d;R03G5.1b | STTTGHLIYK               | 24 | 3112   | 1.60  | 0.22 | 14  |
| 7  | R03G5.1a;F31E3.5;R03G5.1c;R03G5.1d;R03G5.1b | STTTGHLIYK               | 50 | 3316   | 1.60  | 0.23 | 14  |
| 7  | R03G5.1a;F31E3.5;R03G5.1c;R03G5.1d;R03G5.1b | STTTGHLIYK               | 33 | 4935   | 1.61  | 0.24 | 15  |
| 7  | R03G5.1a;F31E3.5;R03G5.1c;R03G5.1d;R03G5.1b | STTTGHLIYK               | 28 | 5591   | 1.61  | 0.20 | 12  |
| 7  | R03G5.1a;F31E3.5;R03G5.1c;R03G5.1d;R03G5.1b | NGQTREHALLAQTLGVK        | 47 | 9515   | 1.62  | 0.12 | 7   |
| 7  | R03G5.1a;F31E3.5;R03G5.1c;R03G5.1d;R03G5.1b | STTTGHLIYK               | 47 | 15321  | 1.66  | 0.14 | 9   |
| 7  | R03G5.1a;F31E3.5;R03G5.1c;R03G5.1d;R03G5.1b | NGQTREHALLAQTLGVK        | 38 | 6076   | 1.69  | 0.13 | 7   |
| 7  | R03G5.1a;F31E3.5;R03G5.1c;R03G5.1d;R03G5.1b | STTTGHLIYK               | 24 | 6751   | 1.69  | 0.13 | 8   |
| 7  | R03G5.1a;F31E3.5;R03G5.1c;R03G5.1d;R03G5.1b | QLIVACNK                 | 16 | 3304   | 1.70  | 0.17 | 10  |
| 7  | R03G5.1a;F31E3.5;R03G5.1c;R03G5.1d;R03G5.1b | YYITIIDAPGHRDFIK         | 23 | 7880   | 1.73  | 0.14 | 8   |
| 7  | R03G5.1a;F31E3.5;R03G5.1c;R03G5.1d;R03G5.1b | YYITIIDAPGHRDFIK         | 23 | 11811  | 1.74  | 0.09 | 5   |
| 7  | R03G5.1a;F31E3.5;R03G5.1c;R03G5.1d;R03G5.1b | STTTGHLIYK               | 55 | 42852  | 1.76  | 0.10 | 6   |
| 7  | R03G5.1a;F31E3.5;R03G5.1c;R03G5.1d;R03G5.1b | STTTGHLIYK               | 38 | 6036   | 1.78  | 0.11 | 6   |
| 7  | R03G5.1a;F31E3.5;R03G5.1c;R03G5.1d;R03G5.1b | GWAVERK                  | 15 | 3236   | 1.87  | 0.10 | 5   |
| 7  | R03G5.1a;F31E3.5;R03G5.1c;R03G5.1d;R03G5.1b | GWAVERK                  | 13 | 4549   | 1.92  | 0.04 | 2   |
| 7  | R03G5.1a;F31E3.5;R03G5.1c;R03G5.1d;R03G5.1b | STTTGHLIYK               | 64 | 55191  | 1.93  | 0.15 | 8   |
| 7  | R03G5.1a;F31E3.5;R03G5.1c;R03G5.1d;R03G5.1b | STTTGHLIYK               | 35 | 8924   | 2.14  | 0.08 | 4   |
| 7  | R03G5.1a;F31E3.5;R03G5.1c;R03G5.1d;R03G5.1b | STTTGHLIYK               | 29 | 6058   | 2.21  | 0.11 | 5   |
| 7  | R03G5.1a;F31E3.5;R03G5.1c;R03G5.1d;R03G5.1b | STTTGHLIYK               | 44 | 10088  | 2.60  | 0.19 | 7   |
| 7  | R03G5.1a;F31E3.5;R03G5.1c;R03G5.1d;R03G5.1b | YYITIIDAPGHRDFIK         | 25 | 5065   | 2.92  | 0.15 | 5   |
| 7  | R03G5.1a;F31E3.5;R03G5.1c;R03G5.1d;R03G5.1b | STTTGHLIYK               | 37 | 7222   | 3.24  | 0.11 | 3   |
| 7  | R03G5.1a;F31E3.5;R03G5.1c;R03G5.1d;R03G5.1b | STTTGHLIYK               | 45 | 6283   | 3.77  | 0.58 | 15  |
| 7  | R03G5.1a;F31E3.5;R03G5.1c;R03G5.1d;R03G5.1b | QLIVACNK                 | 14 | 2165   | 5.52  | 0.26 | 5   |
| 7  | R03G5.1a;F31E3.5;R03G5.1c;R03G5.1d;R03G5.1b | GWAVERK                  | 22 | 4410   | 9.28  | 0.26 | 3   |
| 7  | R03G5.1a;F31E3.5;R03G5.1c;R03G5.1d;R03G5.1b | STTTGHLIYK               | 51 | 14359  | 18.08 | 0.34 | 2   |
| 7  | R03G5.1a;F31E3.5;R03G5.1c;R03G5.1d;R03G5.1b | STTTGHLIYK               | 52 | 12174  | 73.96 | 0.19 | 0   |
| 10 | R03G5.1a;F31E3.5;R03G5.1d;R03G5.1c;R03G5.1b | GWAVERK                  | 27 | 38178  | 0.06  | 0.19 | 313 |
| 10 | R03G5.1a;F31E3.5;R03G5.1d;R03G5.1c;R03G5.1b | STTTGHLIYK               | 52 | 28445  | 0.09  | 0.27 | 283 |
| 10 | R03G5.1a;F31E3.5;R03G5.1d;R03G5.1c;R03G5.1b | STTTGHLIYK               | 60 | 33514  | 0.10  | 0.12 | 123 |
| 10 | R03G5.1a;F31E3.5;R03G5.1d;R03G5.1c;R03G5.1b | NGQTREHALLAQTLGVK        | 13 | 3755   | 0.11  | 0.46 | 421 |
| 10 | R03G5.1a;F31E3.5;R03G5.1d;R03G5.1c;R03G5.1b | NGQTREHALLAQTLGVK        | 64 | 103020 | 0.23  | 0.10 | 44  |
| 10 | R03G5.1a;F31E3.5;R03G5.1d;R03G5.1c;R03G5.1b | NGQTREHALLAQTLGVK        | 54 | 85743  | 0.23  | 0.08 | 34  |
| 10 | R03G5.1a;F31E3.5;R03G5.1d;R03G5.1c;R03G5.1b | STTTGHLIYK               | 50 | 12551  | 0.25  | 0.12 | 49  |
| 10 | R03G5.1a;F31E3.5;R03G5.1d;R03G5.1c;R03G5.1b | STTTGHLIYK               | 57 | 10244  | 0.26  | 0.15 | 58  |
| 10 | R03G5.1a;F31E3.5;R03G5.1d;R03G5.1c;R03G5.1b | NGQTREHALLAQTLGVK        | 50 | 16240  | 0.32  | 0.12 | 37  |
| 10 | R03G5.1a;F31E3.5;R03G5.1d;R03G5.1c;R03G5.1b | NGQTREHALLAQTLGVK        | 65 | 25291  | 0.34  | 0.11 | 32  |
| 10 | R03G5.1a;F31E3.5;R03G5.1d;R03G5.1c;R03G5.1b | NGQTREHALLAQTLGVK        | 10 | 1824   | 0.37  | 0.20 | 53  |
| 10 | R03G5.1a;F31E3.5;R03G5.1d;R03G5.1c;R03G5.1b | YYITIIDAPGHRDFIK         | 35 | 22018  | 0.37  | 0.12 | 33  |
| 10 | R03G5.1a;F31E3.5;R03G5.1d;R03G5.1c;R03G5.1b | GWAVERK                  | 27 | 78980  | 0.39  | 0.17 | 43  |
| 1  | R03G5.1a;F31E3.5;R03G5.1d;R03G5.1c;R03G5.1b | STTTGHLIYK               | 48 | 1789   | 0.40  | 0.10 | 26  |
| 10 | R03G5.1a;F31E3.5;R03G5.1d;R03G5.1c;R03G5.1b | YYITIIDAPGHRDFIK         | 41 | 11437  | 0.40  | 0.13 | 32  |
| 10 | R03G5.1a;F31E3.5;R03G5.1d;R03G5.1c;R03G5.1b | YYITIIDAPGHRDFIK         | 40 | 10559  | 0.41  | 0.27 | 66  |
| 10 | R03G5.1a;F31E3.5;R03G5.1d;R03G5.1c;R03G5.1b | YYITIIDAPGHRDFIK         | 15 | 3461   | 0.42  | 0.16 | 37  |
| 1  | R03G5.1a;F31E3.5;R03G5.1d;R03G5.1c;R03G5.1b | STTTGHLIYK               | 30 | 2669   | 0.42  | 0.17 | 41  |
| 1  | R03G5.1a;F31E3.5;R03G5.1d;R03G5.1c;R03G5.1b | YYITIIDAPGHRDFIK         | 14 | 1944   | 0.44  | 0.27 | 60  |
| 10 | R03G5.1a;F31E3.5;R03G5.1d;R03G5.1c;R03G5.1b | YYITIIDAPGHRDFIK         | 29 | 3655   | 0.45  | 0.36 | 80  |
| 10 | R03G5.1a;F31E3.5;R03G5.1d;R03G5.1c;R03G5.1b | GWAVERK                  | 28 | 73117  | 0.45  | 0.18 | 40  |
| 10 | R03G5.1a;F31E3.5;R03G5.1d;R03G5.1c;R03G5.1b | QLIVACNK                 | 22 | 3470   | 0.45  | 0.15 | 33  |
| 1  | R03G5.1a;F31E3.5;R03G5.1d;R03G5.1c;R03G5.1b | IGYNPK                   | 14 | 31173  | 0.48  | 0.12 | 26  |
| 10 | R03G5.1a;F31E3.5;R03G5.1d;R03G5.1c;R03G5.1b | YYITIIDAPGHRDFIK         | 22 | 8135   | 0.48  | 0.14 | 30  |
| 10 | R03G5.1a;F31E3.5;R03G5.1d;R03G5.1c;R03G5.1b | YYITIIDAPGHRDFIK         | 32 | 18313  | 0.49  | 0.12 | 24  |
| 10 | R03G5.1a;F31E3.5;R03G5.1d;R03G5.1c;R03G5.1b | YYITIIDAPGHRDFIK         | 37 | 9908   | 0.50  | 0.11 | 22  |
| 10 | R03G5.1a;F31E3.5;R03G5.1d;R03G5.1c;R03G5.1b | MDSTEPFSEARFTEITNEVSGFIK | 24 | 3720   | 0.50  | 0.15 | 30  |
| 10 | R03G5.1a;F31E3.5;R03G5.1d;R03G5.1c;R03G5.1b | YYITIIDAPGHRDFIK         | 33 | 53582  | 0.52  | 0.15 | 29  |
| 10 | R03G5.1a;F31E3.5;R03G5.1d;R03G5.1c;R03G5.1b | YYITIIDAPGHRDFIK         | 35 | 14286  | 0.52  | 0.11 | 21  |
| 10 | R03G5.1a;F31E3.5;R03G5.1d;R03G5.1c;R03G5.1b | YYITIIDAPGHRDFIK         | 28 | 5192   | 0.52  | 0.18 | 34  |
| 1  | R03G5.1a;F31E3.5;R03G5.1d;R03G5.1c;R03G5.1b | IGYNPK                   | 16 | 25491  | 0.54  | 0.13 | 24  |
| 10 | R03G5.1a;F31E3.5;R03G5.1d;R03G5.1c;R03G5.1b | YYITIIDAPGHRDFIK         | 20 | 4122   | 0.54  | 0.12 | 22  |
| 10 | R03G5.1a;F31E3.5;R03G5.1d;R03G5.1c;R03G5.1b | QLIVACNK                 | 25 | 3182   | 0.55  | 0.19 | 35  |
| 10 | R03G5.1a;F31E3.5;R03G5.1d;R03G5.1c;R03G5.1b | YYITIIDAPGHRDFIK         | 36 | 11546  | 0.55  | 0.11 | 21  |
| 10 | R03G5.1a;F31E3.5;R03G5.1d;R03G5.1c;R03G5.1b | NGQTREHALLAQTLGVK        | 45 | 12227  | 0.56  | 0.08 | 14  |
| 10 | R03G5.1a;F31E3.5;R03G5.1d;R03G5.1c;R03G5.1b | YYITIIDAPGHRDFIK         | 37 | 7847   | 0.58  | 0.26 | 44  |
| 1  | R03G5.1a;F31E3.5;R03G5.1d;R03G5.1c;R03G5.1b | NGQTREHALLAQTLGVK        | 14 | 6943   | 0.59  | 0.20 | 34  |
| 1  | R03G5.1a;F31E3.5;R03G5.1d;R03G5.1c;R03G5.1b | YYITIIDAPGHRDFIK         | 22 | 2008   | 0.59  | 0.15 | 25  |
| 10 | R03G5.1a;F31E3.5;R03G5.1d;R03G5.1c;R03G5.1b | MDSTEPFSEARFTEITNEVSGFIK | 31 | 2060   | 0.60  | 0.16 | 27  |
| 1  | R03G5.1a;F31E3.5;R03G5.1d;R03G5.1c;R03G5.1b | YYITIIDAPGHRDFIK         | 13 | 4393   | 0.60  | 0.13 | 22  |
| 10 | R03G5.1a;F31E3.5;R03G5.1d;R03G5.1c;R03G5.1b | YYITIIDAPGHRDFIK         | 37 | 43937  | 0.60  | 0.24 | 39  |
| 1  | R03G5.1a;F31E3.5;R03G5.1d;R03G5.1c;R03G5.1b | GWAVERK                  | 16 | 1559   | 0.61  | 0.11 | 17  |
| 10 | R03G5.1a;F31E3.5;R03G5.1d;R03G5.1c;R03G5.1b | NGQTREHALLAQTLGVK        | 41 | 8704   | 0.61  | 0.23 | 37  |
| 10 | R03G5.1a;F31E3.5;R03G5.1d;R03G5.1c;R03G5.1b | MDSTEPFSEARFTEITNEVSGFIK | 24 | 3727   | 0.62  | 0.12 | 20  |
| 1  | R03G5.1a;F31E3.5;R03G5.1d;R03G5.1c;R03G5.1b | NGQTREHALLAQTLGVK        | 27 | 6715   | 0.63  | 0.22 | 35  |
| 10 | R03G5.1a;F31E3.5;R03G5.1d;R03G5.1c;R03G5.1b | YYITIIDAPGHRDFIK         | 29 | 10942  | 0.63  | 0.19 | 30  |
| 1  | R03G5.1a;F31E3.5;R03G5.1d;R03G5.1c;R03G5.1b | NGQTREHALLAQTLGVK        | 57 | 187897 | 0.64  | 0.14 | 21  |
| 10 | R03G5.1a;F31E3.5;R03G5.1d;R03G5.1c;R03G5.1b | MDSTEPFSEARFTEITNEVSGFIK | 34 | 3653   | 0.65  | 0.12 | 19  |
| 10 | R03G5.1a;F31E3.5;R03G5.1d;R03G5.1c;R03G5.1b | NGQTREHALLAQTLGVK        | 47 | 9701   | 0.66  | 0.18 | 28  |
| 10 | R03G5.1a;F31E3.5;R03G5.1d;R03G5.1c;R03G5.1b | YYITIIDAPGHRDFIK         | 28 | 20190  | 0.66  | 0.18 | 27  |
| 10 | R03G5.1a;F31E3.5;R03G5.1d;R03G5.1c;R03G5.1b | YYITIIDAPGHRDFIK         | 17 | 4076   | 0.67  | 0.16 | 24  |
| 10 | R03G5.1a;F31E3.5;R03G5.1d;R03G5.1c;R03G5.1b | GWAVERK                  | 19 | 29756  | 0.67  | 0.05 | 7   |
| 1  | R03G5.1a;F31E3.5;R03G5.1d;R03G5.1c;R03G5.1b | QLIVACNK                 | 17 | 14942  | 0.67  | 0.30 | 45  |
| 10 | R03G5.1a;F31E3.5;R03G5.1d;R03G5.1c;R03G5.1b | MDSTEPFSEARFTEITNEVSGFIK | 32 | 1431   | 0.67  | 0.23 | 35  |
| 10 | R03G5.1a;F31E3.5;R03G5.1d;R03G5.1c;R03G5.1b | STTTGHLIYK               | 75 | 88517  | 0.67  | 0.08 | 12  |
| 10 | R03G5.1a;F31E3.5;R03G5.1d;R03G5.1c;R03G5.1b | STTTGHLIYK               | 66 | 125852 | 0.68  | 0.09 | 13  |
| 10 | R03G5.1a;F31E3.5;R03G5.1d;R03G5.1c;R03G5.1b | STTTGHLIYK               | 57 | 48944  | 0.68  | 0.11 | 17  |
| 1  | R03G5.1a;F31E3.5;R03G5.1d;R03G5.1c;R03G5.1b | NGQTREHALLAQTLGVK        | 34 | 2883   | 0.69  | 0.13 | 18  |
| 10 | R03G5.1a;F31E3.5;R03G5.1d;R03G5.1c;R03G5.1b | YYITIIDAPGHRDFIK         | 36 | 10656  | 0.69  | 0.09 | 13  |
| 10 | R03G5.1a;F31E3.5;R03G5.1d;R03G5.1c;R03G5.1b | NGQTREHALLAQTLGVK        | 10 | 4855   | 0.70  | 0.08 | 12  |
| 10 | R03G5.1a;F31E3.5;R03G5.1d;R03G5.1c;R03G5.1b | GWAVERK                  | 38 | 87831  | 0.70  | 0.10 | 15  |

|    |                                             |                            |    |        |      |      |    |
|----|---------------------------------------------|----------------------------|----|--------|------|------|----|
| 10 | R03G5.1a;F31E3.5;R03G5.1d;R03G5.1c;R03G5.1b | GWAVERK                    | 35 | 97578  | 0.70 | 0.05 | 7  |
| 10 | R03G5.1a;F31E3.5;R03G5.1d;R03G5.1c;R03G5.1b | YYITIIDAPGHRDFIK           | 33 | 2927   | 0.72 | 0.12 | 17 |
| 10 | R03G5.1a;F31E3.5;R03G5.1d;R03G5.1c;R03G5.1b | GWAVERK                    | 21 | 23457  | 0.72 | 0.08 | 11 |
| 1  | R03G5.1a;F31E3.5;R03G5.1d;R03G5.1c;R03G5.1b | YYITIIDAPGHRDFIK           | 11 | 2741   | 0.73 | 0.20 | 27 |
| 1  | R03G5.1a;F31E3.5;R03G5.1d;R03G5.1c;R03G5.1b | STTTGHLIYK                 | 61 | 24250  | 0.73 | 0.13 | 18 |
| 10 | R03G5.1a;F31E3.5;R03G5.1d;R03G5.1c;R03G5.1b | YYITIIDAPGHRDFIK           | 15 | 2290   | 0.73 | 0.11 | 15 |
| 1  | R03G5.1a;F31E3.5;R03G5.1d;R03G5.1c;R03G5.1b | YYITIIDAPGHRDFIK           | 19 | 2649   | 0.74 | 0.11 | 15 |
| 1  | R03G5.1a;F31E3.5;R03G5.1d;R03G5.1c;R03G5.1b | NGQTREHALLAQTLGVK          | 43 | 9767   | 0.74 | 0.11 | 15 |
| 1  | R03G5.1a;F31E3.5;R03G5.1d;R03G5.1c;R03G5.1b | NGQTREHALLAQTLGVK          | 44 | 5248   | 0.74 | 0.10 | 13 |
| 1  | R03G5.1a;F31E3.5;R03G5.1d;R03G5.1c;R03G5.1b | NGQTREHALLAQTLGVK          | 37 | 8100   | 0.76 | 0.12 | 16 |
| 10 | R03G5.1a;F31E3.5;R03G5.1d;R03G5.1c;R03G5.1b | STTTGHLIYK                 | 67 | 39915  | 0.76 | 0.15 | 20 |
| 1  | R03G5.1a;F31E3.5;R03G5.1d;R03G5.1c;R03G5.1b | YYITIIDAPGHRDFIK           | 15 | 6812   | 0.76 | 0.08 | 11 |
| 1  | R03G5.1a;F31E3.5;R03G5.1d;R03G5.1c;R03G5.1b | NGQTREHALLAQTLGVK          | 18 | 9499   | 0.77 | 0.12 | 15 |
| 10 | R03G5.1a;F31E3.5;R03G5.1d;R03G5.1c;R03G5.1b | NGQTREHALLAQTLGVK          | 38 | 20663  | 0.77 | 0.26 | 34 |
| 1  | R03G5.1a;F31E3.5;R03G5.1d;R03G5.1c;R03G5.1b | STTTGHLIYK                 | 71 | 448518 | 0.78 | 0.10 | 13 |
| 10 | R03G5.1a;F31E3.5;R03G5.1d;R03G5.1c;R03G5.1b | STTTGHLIYK                 | 51 | 53886  | 0.78 | 0.11 | 14 |
| 10 | R03G5.1a;F31E3.5;R03G5.1d;R03G5.1c;R03G5.1b | STTTGHLIYK                 | 16 | 5113   | 0.78 | 0.33 | 41 |
| 1  | R03G5.1a;F31E3.5;R03G5.1d;R03G5.1c;R03G5.1b | YYITIIDAPGHRDFIK           | 26 | 6170   | 0.79 | 0.08 | 10 |
| 10 | R03G5.1a;F31E3.5;R03G5.1d;R03G5.1c;R03G5.1b | YYITIIDAPGHRDFIK           | 31 | 8272   | 0.79 | 0.15 | 19 |
| 1  | R03G5.1a;F31E3.5;R03G5.1d;R03G5.1c;R03G5.1b | YYITIIDAPGHRDFIK           | 13 | 2174   | 0.80 | 0.32 | 40 |
| 10 | R03G5.1a;F31E3.5;R03G5.1d;R03G5.1c;R03G5.1b | STTTGHLIYK                 | 50 | 65842  | 0.80 | 0.11 | 14 |
| 1  | R03G5.1a;F31E3.5;R03G5.1d;R03G5.1c;R03G5.1b | NGQTREHALLAQTLGVK          | 27 | 1992   | 0.81 | 0.15 | 18 |
| 10 | R03G5.1a;F31E3.5;R03G5.1d;R03G5.1c;R03G5.1b | NGQTREHALLAQTLGVK          | 46 | 11003  | 0.81 | 0.09 | 11 |
| 1  | R03G5.1a;F31E3.5;R03G5.1d;R03G5.1c;R03G5.1b | YYITIIDAPGHRDFIK           | 28 | 5635   | 0.82 | 0.15 | 19 |
| 10 | R03G5.1a;F31E3.5;R03G5.1d;R03G5.1c;R03G5.1b | NGQTREHALLAQTLGVK          | 51 | 14660  | 0.84 | 0.24 | 29 |
| 1  | R03G5.1a;F31E3.5;R03G5.1d;R03G5.1c;R03G5.1b | NGQTREHALLAQTLGVK          | 41 | 7279   | 0.84 | 0.11 | 13 |
| 10 | R03G5.1a;F31E3.5;R03G5.1d;R03G5.1c;R03G5.1b | NGQTREHALLAQTLGVK          | 36 | 22698  | 0.85 | 0.15 | 18 |
| 10 | R03G5.1a;F31E3.5;R03G5.1d;R03G5.1c;R03G5.1b | NGQTREHALLAQTLGVK          | 57 | 24024  | 0.86 | 0.12 | 14 |
| 10 | R03G5.1a;F31E3.5;R03G5.1d;R03G5.1c;R03G5.1b | YYITIIDAPGHRDFIK           | 25 | 9165   | 0.86 | 0.16 | 19 |
| 10 | R03G5.1a;F31E3.5;R03G5.1d;R03G5.1c;R03G5.1b | QLIVACNK                   | 31 | 8487   | 0.86 | 0.20 | 23 |
| 10 | R03G5.1a;F31E3.5;R03G5.1d;R03G5.1c;R03G5.1b | STTTGHLIYK                 | 43 | 10188  | 0.86 | 0.17 | 20 |
| 1  | R03G5.1a;F31E3.5;R03G5.1d;R03G5.1c;R03G5.1b | NGQTREHALLAQTLGVK          | 11 | 1645   | 0.87 | 0.11 | 13 |
| 1  | R03G5.1a;F31E3.5;R03G5.1d;R03G5.1c;R03G5.1b | STTTGHLIYK                 | 73 | 494993 | 0.87 | 0.09 | 10 |
| 10 | R03G5.1a;F31E3.5;R03G5.1d;R03G5.1c;R03G5.1b | YYITIIDAPGHRDFIK           | 30 | 6241   | 0.88 | 0.09 | 10 |
| 10 | R03G5.1a;F31E3.5;R03G5.1d;R03G5.1c;R03G5.1b | STTTGHLIYK                 | 64 | 412626 | 0.88 | 0.10 | 11 |
| 10 | R03G5.1a;F31E3.5;R03G5.1d;R03G5.1c;R03G5.1b | NGQTREHALLAQTLGVK          | 36 | 19043  | 0.89 | 0.15 | 17 |
| 1  | R03G5.1a;F31E3.5;R03G5.1d;R03G5.1c;R03G5.1b | STTTGHLIYK                 | 50 | 29538  | 0.89 | 0.14 | 16 |
| 10 | R03G5.1a;F31E3.5;R03G5.1d;R03G5.1c;R03G5.1b | STTTGHLIYK                 | 20 | 4956   | 0.89 | 0.12 | 13 |
| 10 | R03G5.1a;F31E3.5;R03G5.1d;R03G5.1c;R03G5.1b | YYITIIDAPGHRDFIK           | 14 | 4512   | 0.90 | 0.14 | 15 |
| 1  | R03G5.1a;F31E3.5;R03G5.1d;R03G5.1c;R03G5.1b | STTTGHLIYK                 | 34 | 5197   | 0.91 | 0.07 | 8  |
| 1  | R03G5.1a;F31E3.5;R03G5.1d;R03G5.1c;R03G5.1b | NGQTREHALLAQTLGVK          | 55 | 3492   | 0.91 | 0.14 | 15 |
| 10 | R03G5.1a;F31E3.5;R03G5.1d;R03G5.1c;R03G5.1b | STTTGHLIYK                 | 28 | 4980   | 0.92 | 0.15 | 16 |
| 10 | R03G5.1a;F31E3.5;R03G5.1d;R03G5.1c;R03G5.1b | STTTGHLIYK                 | 30 | 11897  | 0.94 | 0.10 | 11 |
| 1  | R03G5.1a;F31E3.5;R03G5.1d;R03G5.1c;R03G5.1b | GWAVERK                    | 39 | 141056 | 0.95 | 0.07 | 7  |
| 1  | R03G5.1a;F31E3.5;R03G5.1d;R03G5.1c;R03G5.1b | STTTGHLIYK                 | 45 | 3888   | 0.95 | 0.06 | 6  |
| 10 | R03G5.1a;F31E3.5;R03G5.1d;R03G5.1c;R03G5.1b | GWAVERK                    | 35 | 27860  | 0.96 | 0.09 | 9  |
| 1  | R03G5.1a;F31E3.5;R03G5.1d;R03G5.1c;R03G5.1b | STTTGHLIYK                 | 73 | 61874  | 0.96 | 0.15 | 15 |
| 1  | R03G5.1a;F31E3.5;R03G5.1d;R03G5.1c;R03G5.1b | NGQTREHALLAQTLGVK          | 31 | 3811   | 0.96 | 0.12 | 12 |
| 10 | R03G5.1a;F31E3.5;R03G5.1d;R03G5.1c;R03G5.1b | NGQTREHALLAQTLGVK          | 43 | 12156  | 0.96 | 0.28 | 29 |
| 10 | R03G5.1a;F31E3.5;R03G5.1d;R03G5.1c;R03G5.1b | STTTGHLIYK                 | 64 | 408707 | 0.96 | 0.08 | 8  |
| 10 | R03G5.1a;F31E3.5;R03G5.1d;R03G5.1c;R03G5.1b | NGQTREHALLAQTLGVK          | 54 | 12069  | 0.96 | 0.18 | 18 |
| 1  | R03G5.1a;F31E3.5;R03G5.1d;R03G5.1c;R03G5.1b | GWAVERK                    | 39 | 189015 | 0.97 | 0.07 | 8  |
| 1  | R03G5.1a;F31E3.5;R03G5.1d;R03G5.1c;R03G5.1b | STTTGHLIYK                 | 48 | 12916  | 0.98 | 0.16 | 17 |
| 1  | R03G5.1a;F31E3.5;R03G5.1d;R03G5.1c;R03G5.1b | GWAVERK                    | 40 | 44382  | 0.99 | 0.07 | 7  |
| 1  | R03G5.1a;F31E3.5;R03G5.1d;R03G5.1c;R03G5.1b | NGQTREHALLAQTLGVK          | 31 | 2397   | 0.99 | 0.13 | 14 |
| 1  | R03G5.1a;F31E3.5;R03G5.1d;R03G5.1c;R03G5.1b | GWAVERK                    | 33 | 38127  | 0.99 | 0.07 | 7  |
| 10 | R03G5.1a;F31E3.5;R03G5.1d;R03G5.1c;R03G5.1b | STTTGHLIYK                 | 32 | 5972   | 1.00 | 0.10 | 10 |
| 10 | R03G5.1a;F31E3.5;R03G5.1d;R03G5.1c;R03G5.1b | YYITIIDAPGHRDFIK           | 13 | 11945  | 1.02 | 0.12 | 12 |
| 10 | R03G5.1a;F31E3.5;R03G5.1d;R03G5.1c;R03G5.1b | GWAVERK                    | 16 | 13784  | 1.02 | 0.17 | 17 |
| 1  | R03G5.1a;F31E3.5;R03G5.1d;R03G5.1c;R03G5.1b | NGQTREHALLAQTLGVK          | 39 | 14557  | 1.03 | 0.16 | 15 |
| 10 | R03G5.1a;F31E3.5;R03G5.1d;R03G5.1c;R03G5.1b | NGQTREHALLAQTLGVK          | 61 | 2524   | 1.03 | 0.22 | 21 |
| 1  | R03G5.1a;F31E3.5;R03G5.1d;R03G5.1c;R03G5.1b | STTTGHLIYK                 | 59 | 47411  | 1.04 | 0.11 | 11 |
| 1  | R03G5.1a;F31E3.5;R03G5.1d;R03G5.1c;R03G5.1b | STTTGHLIYK                 | 15 | 2288   | 1.04 | 0.11 | 11 |
| 1  | R03G5.1a;F31E3.5;R03G5.1d;R03G5.1c;R03G5.1b | NGQTREHALLAQTLGVK          | 67 | 23793  | 1.05 | 0.13 | 13 |
| 10 | R03G5.1a;F31E3.5;R03G5.1d;R03G5.1c;R03G5.1b | STTTGHLIYK                 | 60 | 44753  | 1.06 | 0.13 | 12 |
| 10 | R03G5.1a;F31E3.5;R03G5.1d;R03G5.1c;R03G5.1b | NGQTREHALLAQTLGVK          | 57 | 4202   | 1.07 | 0.07 | 6  |
| 1  | R03G5.1a;F31E3.5;R03G5.1d;R03G5.1c;R03G5.1b | STTTGHLIYK                 | 48 | 13131  | 1.07 | 0.16 | 15 |
| 10 | R03G5.1a;F31E3.5;R03G5.1d;R03G5.1c;R03G5.1b | YYITIIDAPGHRDFIK           | 47 | 16857  | 1.07 | 0.17 | 16 |
| 10 | R03G5.1a;F31E3.5;R03G5.1d;R03G5.1c;R03G5.1b | YYITIIDAPGHRDFIK           | 24 | 12845  | 1.10 | 0.14 | 13 |
| 10 | R03G5.1a;F31E3.5;R03G5.1d;R03G5.1c;R03G5.1b | NGQTREHALLAQTLGVK          | 63 | 26512  | 1.11 | 0.12 | 11 |
| 10 | R03G5.1a;F31E3.5;R03G5.1d;R03G5.1c;R03G5.1b | GWAVERK                    | 35 | 313573 | 1.11 | 0.07 | 6  |
| 10 | R03G5.1a;F31E3.5;R03G5.1d;R03G5.1c;R03G5.1b | YYITIIDAPGHRDFIK           | 32 | 7232   | 1.12 | 0.15 | 14 |
| 10 | R03G5.1a;F31E3.5;R03G5.1d;R03G5.1c;R03G5.1b | STTTGHLIYK                 | 34 | 12556  | 1.13 | 0.10 | 9  |
| 10 | R03G5.1a;F31E3.5;R03G5.1d;R03G5.1c;R03G5.1b | STTTGHLIYK                 | 59 | 224025 | 1.14 | 0.09 | 8  |
| 10 | R03G5.1a;F31E3.5;R03G5.1d;R03G5.1c;R03G5.1b | NGQTREHALLAQTLGVK          | 41 | 25078  | 1.14 | 0.16 | 14 |
| 1  | R03G5.1a;F31E3.5;R03G5.1d;R03G5.1c;R03G5.1b | STTTGHLIYK                 | 54 | 70713  | 1.16 | 0.05 | 4  |
| 1  | R03G5.1a;F31E3.5;R03G5.1d;R03G5.1c;R03G5.1b | GWAVERK                    | 15 | 5174   | 1.17 | 0.09 | 8  |
| 1  | R03G5.1a;F31E3.5;R03G5.1d;R03G5.1c;R03G5.1b | STTTGHLIYK                 | 74 | 78219  | 1.17 | 0.12 | 10 |
| 1  | R03G5.1a;F31E3.5;R03G5.1d;R03G5.1c;R03G5.1b | STTTGHLIYK                 | 57 | 73846  | 1.19 | 0.13 | 11 |
| 1  | R03G5.1a;F31E3.5;R03G5.1d;R03G5.1c;R03G5.1b | STTTGHLIYK                 | 27 | 2953   | 1.20 | 0.13 | 11 |
| 10 | R03G5.1a;F31E3.5;R03G5.1d;R03G5.1c;R03G5.1b | STTTGHLIYK                 | 29 | 9349   | 1.21 | 0.25 | 21 |
| 10 | R03G5.1a;F31E3.5;R03G5.1d;R03G5.1c;R03G5.1b | YYITIIDAPGHRDFIK           | 32 | 7473   | 1.22 | 0.22 | 18 |
| 10 | R03G5.1a;F31E3.5;R03G5.1d;R03G5.1c;R03G5.1b | STTTGHLIYK                 | 61 | 207350 | 1.22 | 0.12 | 10 |
| 10 | R03G5.1a;F31E3.5;R03G5.1d;R03G5.1c;R03G5.1b | GWAVERK                    | 41 | 303945 | 1.23 | 0.06 | 5  |
| 1  | R03G5.1a;F31E3.5;R03G5.1d;R03G5.1c;R03G5.1b | GWAVERK                    | 26 | 44417  | 1.23 | 0.07 | 5  |
| 10 | R03G5.1a;F31E3.5;R03G5.1d;R03G5.1c;R03G5.1b | YYITIIDAPGHRDFIK           | 40 | 33467  | 1.25 | 0.10 | 8  |
| 10 | R03G5.1a;F31E3.5;R03G5.1d;R03G5.1c;R03G5.1b | YYITIIDAPGHRDFIK           | 40 | 20085  | 1.25 | 0.08 | 6  |
| 1  | R03G5.1a;F31E3.5;R03G5.1d;R03G5.1c;R03G5.1b | NGQTREHALLAQTLGVK          | 20 | 1788   | 1.26 | 0.11 | 9  |
| 1  | R03G5.1a;F31E3.5;R03G5.1d;R03G5.1c;R03G5.1b | STTTGHLIYK                 | 38 | 5548   | 1.28 | 0.10 | 8  |
| 10 | R03G5.1a;F31E3.5;R03G5.1d;R03G5.1c;R03G5.1b | QLIVACNK                   | 12 | 8568   | 1.28 | 0.12 | 9  |
| 1  | R03G5.1a;F31E3.5;R03G5.1d;R03G5.1c;R03G5.1b | NGQTREHALLAQTLGVK          | 34 | 2518   | 1.28 | 0.14 | 11 |
| 10 | R03G5.1a;F31E3.5;R03G5.1d;R03G5.1c;R03G5.1b | STTTGHLIYK                 | 65 | 41421  | 1.31 | 0.18 | 13 |
| 1  | R03G5.1a;F31E3.5;R03G5.1d;R03G5.1c;R03G5.1b | GWAVERK                    | 38 | 141256 | 1.31 | 0.07 | 5  |
| 1  | R03G5.1a;F31E3.5;R03G5.1d;R03G5.1c;R03G5.1b | GWAVERK                    | 14 | 5290   | 1.32 | 0.07 | 6  |
| 10 | R03G5.1a;F31E3.5;R03G5.1d;R03G5.1c;R03G5.1b | MDSTEPFPFSEARFTEITNEVSGFIK | 34 | 2002   | 1.33 | 0.21 | 15 |
| 10 | R03G5.1a;F31E3.5;R03G5.1d;R03G5.1c;R03G5.1b | GWAVERK                    | 32 | 87659  | 1.34 | 0.09 | 7  |
| 1  | R03G5.1a;F31E3.5;R03G5.1d;R03G5.1c;R03G5.1b | GWAVERK                    | 28 | 56318  | 1.34 | 0.09 | 7  |
| 1  | R03G5.1a;F31E3.5;R03G5.1d;R03G5.1c;R03G5.1b | STTTGHLIYK                 | 44 | 82947  | 1.35 | 0.08 | 6  |
| 1  | R03G5.1a;F31E3.5;R03G5.1d;R03G5.1c;R03G5.1b | NGQTREHALLAQTLGVK          | 26 | 5599   | 1.35 | 0.29 | 22 |
| 1  | R03G5.1a;F31E3.5;R03G5.1d;R03G5.1c;R03G5.1b | STTTGHLIYK                 | 39 | 9103   | 1.35 | 0.14 | 11 |
| 1  | R03G5.1a;F31E3.5;R03G5.1d;R03G5.1c;R03G5.1b | YYITIIDAPGHRDFIK           | 28 | 8338   | 1.36 | 0.13 | 10 |

|                                                |                         |    |        |       |      |    |
|------------------------------------------------|-------------------------|----|--------|-------|------|----|
| 10 R03G5.1a;F31E3.5;R03G5.1d;R03G5.1c;R03G5.1b | GWAVERK                 | 16 | 8682   | 1.37  | 0.23 | 17 |
| 10 R03G5.1a;F31E3.5;R03G5.1d;R03G5.1c;R03G5.1b | NGQTR EHALLAQTLGVK      | 38 | 10435  | 1.38  | 0.09 | 6  |
| 1 R03G5.1a;F31E3.5;R03G5.1d;R03G5.1c;R03G5.1b  | GWAVERK                 | 13 | 3980   | 1.40  | 0.06 | 4  |
| 10 R03G5.1a;F31E3.5;R03G5.1d;R03G5.1c;R03G5.1b | YYITIIDAPGHRDFIK        | 29 | 45001  | 1.41  | 0.08 | 6  |
| 10 R03G5.1a;F31E3.5;R03G5.1d;R03G5.1c;R03G5.1b | YYITIIDAPGHRDFIK        | 12 | 12777  | 1.41  | 0.11 | 7  |
| 1 R03G5.1a;F31E3.5;R03G5.1d;R03G5.1c;R03G5.1b  | GWAVERK                 | 18 | 7638   | 1.43  | 0.14 | 10 |
| 1 R03G5.1a;F31E3.5;R03G5.1d;R03G5.1c;R03G5.1b  | QLIVACNK                | 14 | 5221   | 1.43  | 0.16 | 11 |
| 1 R03G5.1a;F31E3.5;R03G5.1d;R03G5.1c;R03G5.1b  | GWAVERK                 | 12 | 4134   | 1.44  | 0.08 | 5  |
| 10 R03G5.1a;F31E3.5;R03G5.1d;R03G5.1c;R03G5.1b | NGQTR EHALLAQTLGVK      | 50 | 42291  | 1.46  | 0.10 | 7  |
| 10 R03G5.1a;F31E3.5;R03G5.1d;R03G5.1c;R03G5.1b | GWAVERK                 | 19 | 9589   | 1.46  | 0.16 | 11 |
| 10 R03G5.1a;F31E3.5;R03G5.1d;R03G5.1c;R03G5.1b | STTTGHLIYK              | 49 | 13534  | 1.46  | 0.09 | 6  |
| 10 R03G5.1a;F31E3.5;R03G5.1d;R03G5.1c;R03G5.1b | STTTGHLIYK              | 64 | 15264  | 1.46  | 0.10 | 7  |
| 1 R03G5.1a;F31E3.5;R03G5.1d;R03G5.1c;R03G5.1b  | QLIVACNK                | 29 | 3983   | 1.46  | 0.11 | 8  |
| 1 R03G5.1a;F31E3.5;R03G5.1d;R03G5.1c;R03G5.1b  | STTTGHLIYK              | 36 | 3633   | 1.48  | 0.16 | 11 |
| 1 R03G5.1a;F31E3.5;R03G5.1d;R03G5.1c;R03G5.1b  | STTTGHLIYK              | 69 | 6188   | 1.48  | 0.14 | 9  |
| 10 R03G5.1a;F31E3.5;R03G5.1d;R03G5.1c;R03G5.1b | STTTGHLIYK              | 55 | 9981   | 1.48  | 0.11 | 7  |
| 1 R03G5.1a;F31E3.5;R03G5.1d;R03G5.1c;R03G5.1b  | YYITIIDAPGHRDFIK        | 28 | 7368   | 1.49  | 0.21 | 14 |
| 10 R03G5.1a;F31E3.5;R03G5.1d;R03G5.1c;R03G5.1b | STTTGHLIYK              | 29 | 7200   | 1.50  | 0.07 | 4  |
| 10 R03G5.1a;F31E3.5;R03G5.1d;R03G5.1c;R03G5.1b | YYITIIDAPGHRDFIK        | 16 | 5343   | 1.51  | 0.14 | 9  |
| 1 R03G5.1a;F31E3.5;R03G5.1d;R03G5.1c;R03G5.1b  | STTTGHLIYK              | 54 | 6721   | 1.52  | 0.11 | 7  |
| 1 R03G5.1a;F31E3.5;R03G5.1d;R03G5.1c;R03G5.1b  | STTTGHLIYK              | 18 | 3203   | 1.53  | 0.07 | 5  |
| 1 R03G5.1a;F31E3.5;R03G5.1d;R03G5.1c;R03G5.1b  | GWAVERK                 | 11 | 6380   | 1.58  | 0.13 | 8  |
| 10 R03G5.1a;F31E3.5;R03G5.1d;R03G5.1c;R03G5.1b | STTTGHLIYK              | 67 | 67132  | 1.58  | 0.07 | 5  |
| 1 R03G5.1a;F31E3.5;R03G5.1d;R03G5.1c;R03G5.1b  | YYITIIDAPGHRDFIK        | 14 | 2515   | 1.59  | 0.16 | 10 |
| 10 R03G5.1a;F31E3.5;R03G5.1d;R03G5.1c;R03G5.1b | STTTGHLIYK              | 32 | 3727   | 1.60  | 0.11 | 7  |
| 10 R03G5.1a;F31E3.5;R03G5.1d;R03G5.1c;R03G5.1b | GWAVERK                 | 31 | 113997 | 1.60  | 0.09 | 6  |
| 1 R03G5.1a;F31E3.5;R03G5.1d;R03G5.1c;R03G5.1b  | GWAVERK                 | 16 | 3264   | 1.62  | 0.09 | 6  |
| 1 R03G5.1a;F31E3.5;R03G5.1d;R03G5.1c;R03G5.1b  | GWAVERK                 | 19 | 5643   | 1.62  | 0.15 | 9  |
| 1 R03G5.1a;F31E3.5;R03G5.1d;R03G5.1c;R03G5.1b  | YYITIIDAPGHRDFIK        | 14 | 3330   | 1.62  | 0.08 | 5  |
| 1 R03G5.1a;F31E3.5;R03G5.1d;R03G5.1c;R03G5.1b  | QLIVACNK                | 24 | 3827   | 1.66  | 0.32 | 19 |
| 10 R03G5.1a;F31E3.5;R03G5.1d;R03G5.1c;R03G5.1b | STTTGHLIYK              | 48 | 9277   | 1.67  | 0.12 | 7  |
| 10 R03G5.1a;F31E3.5;R03G5.1d;R03G5.1c;R03G5.1b | STTTGHLIYK              | 43 | 15938  | 1.68  | 0.12 | 7  |
| 10 R03G5.1a;F31E3.5;R03G5.1d;R03G5.1c;R03G5.1b | NGQTR EHALLAQTLGVK      | 32 | 8383   | 1.70  | 0.16 | 9  |
| 10 R03G5.1a;F31E3.5;R03G5.1d;R03G5.1c;R03G5.1b | GWAVERK                 | 14 | 6634   | 1.72  | 0.06 | 3  |
| 10 R03G5.1a;F31E3.5;R03G5.1d;R03G5.1c;R03G5.1b | GWAVERK                 | 17 | 7904   | 1.73  | 0.04 | 2  |
| 10 R03G5.1a;F31E3.5;R03G5.1d;R03G5.1c;R03G5.1b | NGQTR EHALLAQTLGVK      | 54 | 16897  | 1.76  | 0.18 | 10 |
| 1 R03G5.1a;F31E3.5;R03G5.1d;R03G5.1c;R03G5.1b  | GWAVERK                 | 39 | 125550 | 1.78  | 0.06 | 3  |
| 10 R03G5.1a;F31E3.5;R03G5.1d;R03G5.1c;R03G5.1b | STTTGHLIYK              | 63 | 67240  | 1.80  | 0.08 | 5  |
| 1 R03G5.1a;F31E3.5;R03G5.1d;R03G5.1c;R03G5.1b  | STTTGHLIYK              | 59 | 7966   | 1.81  | 0.10 | 6  |
| 1 R03G5.1a;F31E3.5;R03G5.1d;R03G5.1c;R03G5.1b  | YYITIIDAPGHRDFIK        | 21 | 8721   | 1.84  | 0.14 | 8  |
| 10 R03G5.1a;F31E3.5;R03G5.1d;R03G5.1c;R03G5.1b | GWAVERK                 | 15 | 14826  | 1.85  | 0.08 | 5  |
| 10 R03G5.1a;F31E3.5;R03G5.1d;R03G5.1c;R03G5.1b | GWAVERK                 | 29 | 13359  | 1.86  | 0.06 | 3  |
| 10 R03G5.1a;F31E3.5;R03G5.1d;R03G5.1c;R03G5.1b | YYITIIDAPGHRDFIK        | 26 | 7349   | 1.88  | 0.08 | 4  |
| 1 R03G5.1a;F31E3.5;R03G5.1d;R03G5.1c;R03G5.1b  | GWAVERK                 | 14 | 6757   | 1.89  | 0.10 | 5  |
| 10 R03G5.1a;F31E3.5;R03G5.1d;R03G5.1c;R03G5.1b | STTTGHLIYK              | 44 | 13563  | 1.91  | 0.11 | 6  |
| 10 R03G5.1a;F31E3.5;R03G5.1d;R03G5.1c;R03G5.1b | STTTGHLIYK              | 22 | 2822   | 1.92  | 0.17 | 9  |
| 1 R03G5.1a;F31E3.5;R03G5.1d;R03G5.1c;R03G5.1b  | GWAVERK                 | 13 | 2969   | 1.92  | 0.07 | 4  |
| 10 R03G5.1a;F31E3.5;R03G5.1d;R03G5.1c;R03G5.1b | NGQTR EHALLAQTLGVK      | 36 | 5747   | 1.94  | 0.13 | 7  |
| 10 R03G5.1a;F31E3.5;R03G5.1d;R03G5.1c;R03G5.1b | STTTGHLIYK              | 54 | 30547  | 1.96  | 0.13 | 7  |
| 10 R03G5.1a;F31E3.5;R03G5.1d;R03G5.1c;R03G5.1b | STTTGHLIYK              | 53 | 6069   | 1.96  | 0.08 | 4  |
| 10 R03G5.1a;F31E3.5;R03G5.1d;R03G5.1c;R03G5.1b | STTTGHLIYK              | 43 | 8419   | 1.96  | 0.08 | 4  |
| 10 R03G5.1a;F31E3.5;R03G5.1d;R03G5.1c;R03G5.1b | STTTGHLIYK              | 36 | 1746   | 1.97  | 0.22 | 11 |
| 10 R03G5.1a;F31E3.5;R03G5.1d;R03G5.1c;R03G5.1b | STTTGHLIYK              | 56 | 10030  | 2.00  | 0.19 | 9  |
| 1 R03G5.1a;F31E3.5;R03G5.1d;R03G5.1c;R03G5.1b  | GWAVERK                 | 21 | 7366   | 2.00  | 0.12 | 6  |
| 1 R03G5.1a;F31E3.5;R03G5.1d;R03G5.1c;R03G5.1b  | STTTGHLIYK              | 50 | 5050   | 2.03  | 0.15 | 7  |
| 10 R03G5.1a;F31E3.5;R03G5.1d;R03G5.1c;R03G5.1b | STTTGHLIYK              | 37 | 9231   | 2.09  | 0.12 | 6  |
| 10 R03G5.1a;F31E3.5;R03G5.1d;R03G5.1c;R03G5.1b | STTTGHLIYK              | 46 | 2538   | 2.10  | 0.11 | 5  |
| 10 R03G5.1a;F31E3.5;R03G5.1d;R03G5.1c;R03G5.1b | YYITIIDAPGHRDFIK        | 27 | 6175   | 2.11  | 0.18 | 9  |
| 1 R03G5.1a;F31E3.5;R03G5.1d;R03G5.1c;R03G5.1b  | GWAVERK                 | 24 | 9703   | 2.17  | 0.15 | 7  |
| 1 R03G5.1a;F31E3.5;R03G5.1d;R03G5.1c;R03G5.1b  | STTTGHLIYK              | 47 | 14679  | 2.19  | 0.08 | 4  |
| 10 R03G5.1a;F31E3.5;R03G5.1d;R03G5.1c;R03G5.1b | STTTGHLIYK              | 52 | 250723 | 2.28  | 0.05 | 2  |
| 1 R03G5.1a;F31E3.5;R03G5.1d;R03G5.1c;R03G5.1b  | GWAVERK                 | 22 | 3091   | 2.31  | 0.09 | 4  |
| 1 R03G5.1a;F31E3.5;R03G5.1d;R03G5.1c;R03G5.1b  | GWAVERK                 | 17 | 15766  | 2.33  | 0.11 | 5  |
| 1 R03G5.1a;F31E3.5;R03G5.1d;R03G5.1c;R03G5.1b  | STTTGHLIYK              | 44 | 8224   | 2.39  | 0.16 | 7  |
| 10 R03G5.1a;F31E3.5;R03G5.1d;R03G5.1c;R03G5.1b | STTTGHLIYK              | 28 | 1575   | 2.39  | 0.11 | 5  |
| 1 R03G5.1a;F31E3.5;R03G5.1d;R03G5.1c;R03G5.1b  | STTTGHLIYK              | 39 | 10117  | 2.48  | 0.08 | 3  |
| 1 R03G5.1a;F31E3.5;R03G5.1d;R03G5.1c;R03G5.1b  | STTTGHLIYK              | 34 | 12245  | 2.50  | 0.06 | 2  |
| 1 R03G5.1a;F31E3.5;R03G5.1d;R03G5.1c;R03G5.1b  | GWAVERK                 | 18 | 12531  | 2.55  | 0.15 | 6  |
| 10 R03G5.1a;F31E3.5;R03G5.1d;R03G5.1c;R03G5.1b | STTTGHLIYK              | 31 | 5012   | 2.72  | 0.11 | 4  |
| 10 R03G5.1a;F31E3.5;R03G5.1d;R03G5.1c;R03G5.1b | STTTGHLIYK              | 61 | 314187 | 2.78  | 0.12 | 4  |
| 10 R03G5.1a;F31E3.5;R03G5.1d;R03G5.1c;R03G5.1b | QLIVACNK                | 24 | 8454   | 2.82  | 0.16 | 6  |
| 10 R03G5.1a;F31E3.5;R03G5.1d;R03G5.1c;R03G5.1b | STTTGHLIYK              | 43 | 2212   | 3.68  | 0.12 | 3  |
| 10 R03G5.1a;F31E3.5;R03G5.1d;R03G5.1c;R03G5.1b | STTTGHLIYK              | 33 | 6221   | 4.42  | 0.17 | 4  |
| 10 R03G5.1a;F31E3.5;R03G5.1d;R03G5.1c;R03G5.1b | STTTGHLIYK              | 34 | 10715  | 4.68  | 0.17 | 4  |
| 10 R03G5.1a;F31E3.5;R03G5.1d;R03G5.1c;R03G5.1b | GWAVERK                 | 11 | 3592   | 6.82  | 0.24 | 4  |
| 10 R03G5.1a;F31E3.5;R03G5.1d;R03G5.1c;R03G5.1b | GWAVERK                 | 11 | 5626   | 16.45 | 0.53 | 3  |
| 1 R04A9.4                                      | HAIYAVEPREEK            | 28 | 4978   | 1.17  | 0.17 | 14 |
| 1 R04A9.4                                      | HAIYAVEPREEK            | 17 | 3817   | 2.35  | 0.15 | 6  |
| 1 R05D3.7                                      | LFSEYSAK                | 13 | 779    | 0.50  | 0.19 | 37 |
| 10 R05F9.10                                    | ALELEPNQESYK            | 18 | 5934   | 0.58  | 0.30 | 51 |
| 10 R05F9.12                                    | FIWETK                  | 34 | 922    | 0.55  | 0.18 | 32 |
| 10 R05F9.12                                    | NLYGLTEAINTQK           | 42 | 852    | 0.76  | 0.21 | 27 |
| 10 R05F9.12                                    | NLYGLTEAINTQK           | 61 | 2024   | 1.06  | 0.14 | 13 |
| 10 R05F9.12                                    | NLYGLTEAINTQK           | 72 | 1987   | 1.14  | 0.16 | 14 |
| 10 R05F9.12                                    | SIGSVLNVK               | 25 | 942    | 1.39  | 0.20 | 14 |
| 10 R05F9.12                                    | QRFYNVK                 | 14 | 1667   | 1.96  | 0.22 | 11 |
| 22 R05F9.12                                    | NLYGLTEAINTQK           | 70 | 1485   | 15.07 | 0.28 | 2  |
| 7 R05F9.6                                      | SLLAGELTGRK             | 18 | 1706   | 0.61  | 0.14 | 23 |
| 10 R05F9.6                                     | SLLAGELTGRK             | 22 | 4607   | 0.63  | 0.14 | 22 |
| 1 R05F9.6                                      | SLLAGELTGRK             | 30 | 1785   | 0.69  | 0.16 | 23 |
| 22 R05F9.6                                     | GHEGRVVDGGIILTASHNPGGPK | 26 | 6806   | 0.97  | 0.22 | 23 |
| 22 R05F9.6                                     | GHEGRVVDGGIILTASHNPGGPK | 43 | 5886   | 1.08  | 0.15 | 14 |
| 10 R05F9.6                                     | GHEGRVVDGGIILTASHNPGGPK | 25 | 6249   | 1.08  | 0.13 | 12 |
| 10 R05F9.6                                     | GHEGRVVDGGIILTASHNPGGPK | 13 | 6513   | 1.12  | 0.20 | 18 |
| 10 R05F9.6                                     | SLLAGELTGRK             | 44 | 16915  | 1.19  | 0.12 | 10 |
| 7 R05F9.6                                      | SLLAGELTGRK             | 15 | 2343   | 1.21  | 0.12 | 10 |
| 10 R05F9.6                                     | GHEGRVVDGGIILTASHNPGGPK | 18 | 4359   | 1.25  | 0.16 | 13 |
| 22 R05F9.6                                     | GHEGRVVDGGIILTASHNPGGPK | 22 | 4045   | 1.31  | 0.18 | 14 |
| 10 R05F9.6                                     | GHEGRVVDGGIILTASHNPGGPK | 36 | 7450   | 1.32  | 0.21 | 16 |
| 22 R05F9.6                                     | GHEGRVVDGGIILTASHNPGGPK | 21 | 2562   | 1.35  | 0.27 | 20 |
| 22 R05F9.6                                     | SLLAGELTGRK             | 21 | 12455  | 1.38  | 0.09 | 6  |

|                               |                          |     |       |      |      |     |
|-------------------------------|--------------------------|-----|-------|------|------|-----|
| 22 R05F9.6                    | SLLAGELTGRK              | 24  | 2703  | 1.39 | 0.16 | 11  |
| 10 R05F9.6                    | SLLAGELTGRK              | 35  | 4044  | 1.44 | 0.08 | 5   |
| 22 R05F9.6                    | SLLAGELTGRK              | 14  | 3134  | 1.47 | 0.09 | 6   |
| 7 R05F9.6                     | SLLAGELTGRK              | 11  | 2461  | 1.62 | 0.17 | 10  |
| 22 R05F9.6                    | SLLAGELTGRK              | 42  | 8771  | 1.69 | 0.11 | 6   |
| 10 R05F9.6                    | SLLAGELTGRK              | 33  | 4799  | 1.71 | 0.09 | 5   |
| 7 R05F9.6                     | SLLAGELTGRK              | 27  | 4014  | 2.31 | 0.18 | 8   |
| 1 R05G6.7                     | VTLDSELYAPHAGK           | 42  | 2940  | 0.30 | 0.09 | 32  |
| 1 R05G6.7                     | VTLDSELYAPHAGK           | 50  | 3257  | 0.44 | 0.12 | 28  |
| 1 R05G6.7                     | VTLDSELYAPHAGK           | 51  | 3788  | 0.57 | 0.12 | 22  |
| 10 R06C7.1                    | RLTLENIINK               | 23  | 651   | 1.95 | 0.10 | 5   |
| 10 R06C7.1                    | RLTLENIINK               | 27  | 432   | 3.07 | 0.27 | 9   |
| 22 R06C7.10                   | SIEAVDGNLAK              | 25  | 880   | 0.79 | 0.17 | 22  |
| 22 R06C7.10                   | LTDQHLGK                 | 25  | 1321  | 1.06 | 0.19 | 18  |
| 22 R06C7.10                   | RQIEEAEEVATQNLSK         | 11  | 1013  | 1.09 | 0.12 | 11  |
| 22 R06C7.10                   | TAFSSQLVEAK              | 20  | 1078  | 1.10 | 0.18 | 17  |
| 22 R06C7.10                   | GAQETIDELSAIK            | 39  | 1267  | 1.14 | 0.09 | 8   |
| 22 R06C7.10                   | GAQETIDELSAIK            | 35  | 1341  | 1.20 | 0.17 | 14  |
| 1 R06C7.10                    | SIEAVDGNLAK              | 32  | 977   | 1.30 | 0.25 | 19  |
| 10 R06C7.10                   | TAFSSQLVEAK              | 61  | 1337  | 1.32 | 0.16 | 12  |
| 1 R06C7.10                    | RQIEEAEEVATQNLSK         | 11  | 656   | 1.38 | 0.19 | 13  |
| 10 R06C7.10                   | TAFSSQLVEAK              | 21  | 875   | 1.38 | 0.18 | 13  |
| 10 R06C7.10                   | GAQETIDELSAIK            | 32  | 814   | 1.45 | 0.30 | 20  |
| 1 R06C7.10                    | GAQETIDELSAIK            | 23  | 871   | 2.50 | 0.14 | 6   |
| 22 R06C7.5a;R06C7.5b          | NSPLVSILSETNK            | 20  | 965   | 1.32 | 0.17 | 13  |
| 22 R06F6.9                    | IALNRPK                  | 28  | 8241  | 0.49 | 0.35 | 73  |
| 10 R06F6.9                    | IALNRPK                  | 21  | 4329  | 0.75 | 0.13 | 18  |
| 7 R06F6.9                     | YDAWNTLK                 | 14  | 1790  | 0.90 | 0.16 | 17  |
| 10 R06F6.9                    | IALNRPK                  | 17  | 2695  | 0.91 | 0.06 | 7   |
| 10 R07B1.4                    | FSRVLLGMIQANK            | 31  | 2946  | 0.42 | 0.25 | 60  |
| 10 R07B1.4                    | FSRVLLGMIQANK            | 39  | 2278  | 0.51 | 0.23 | 46  |
| 22 R07B1.4                    | FSRVLLGMIQANK            | 47  | 1302  | 0.52 | 0.21 | 41  |
| 10 R07B1.4                    | ENVLPDVEK                | 14  | 3945  | 0.57 | 0.16 | 27  |
| 22 R07B1.4                    | SEMPLGQVPVLEIDGVK        | 32  | 3191  | 0.58 | 0.12 | 21  |
| 10 R07B1.4                    | FSRVLLGMIQANK            | 34  | 3414  | 0.62 | 0.13 | 21  |
| 22 R07B1.4                    | ENVLPDVEK                | 10  | 5342  | 0.67 | 0.23 | 35  |
| 22 R07B1.4                    | SEMPLGQVPVLEIDGVK        | 38  | 2285  | 0.69 | 0.18 | 26  |
| 22 R07B1.4                    | FSRVLLGMIQANK            | 35  | 992   | 0.70 | 0.24 | 34  |
| 10 R07B1.4                    | SEMPLGQVPVLEIDGVK        | 20  | 2296  | 0.78 | 0.20 | 25  |
| 10 R07B1.4                    | SEMPLGQVPVLEIDGVK        | 53  | 3025  | 0.80 | 0.20 | 25  |
| 10 R07B1.4                    | FSRVLLGMIQANK            | 41  | 3096  | 0.84 | 0.23 | 28  |
| 10 R07B1.4                    | SEMPLGQVPVLEIDGVK        | 37  | 2438  | 0.84 | 0.12 | 14  |
| 10 R07B1.4                    | ENVLPDVEK                | 22  | 4719  | 0.89 | 0.12 | 14  |
| 22 R07B1.4                    | SEMPLGQVPVLEIDGVK        | 31  | 1788  | 0.91 | 0.25 | 27  |
| 7 R07B1.4                     | SEMPLGQVPVLEIDGVK        | 88  | 2451  | 1.00 | 0.16 | 16  |
| 7 R07B1.4                     | SEMPLGQVPVLEIDGVK        | 12  | 1786  | 1.01 | 0.12 | 12  |
| 1 R07B1.4                     | SEMPLGQVPVLEIDGVK        | 39  | 733   | 1.06 | 0.10 | 10  |
| 1 R07B1.4                     | FSRVLLGMIQANK            | 15  | 1325  | 1.11 | 0.23 | 21  |
| 7 R07B1.4                     | SEMPLGQVPVLEIDGVK        | 74  | 2385  | 1.15 | 0.15 | 13  |
| 22 R07B1.4                    | SEMPLGQVPVLEIDGVK        | 15  | 1563  | 1.16 | 0.11 | 9   |
| 10 R07B1.4                    | SEMPLGQVPVLEIDGVK        | 59  | 2553  | 1.19 | 0.20 | 17  |
| 22 R07B1.4                    | FSRVLLGMIQANK            | 29  | 943   | 1.41 | 0.38 | 27  |
| 22 R07B1.4                    | FSRVLLGMIQANK            | 18  | 2984  | 1.54 | 0.08 | 5   |
| 10 R07B1.4                    | SEMPLGQVPVLEIDGVK        | 53  | 3166  | 1.54 | 0.21 | 14  |
| 10 R07B1.4                    | SEMPLGQVPVLEIDGVK        | 20  | 1643  | 2.01 | 0.31 | 15  |
| 10 R07E4.6b;R07E4.6a;R07E4.6c | NLLFAHLEEDEQK            | 45  | 1024  | 0.67 | 0.13 | 19  |
| 22 R07E4.6b;R07E4.6a;R07E4.6c | NLLFAHLEEDEQK            | 100 | 5317  | 0.75 | 0.11 | 15  |
| 7 R07E4.6b;R07E4.6a;R07E4.6c  | NLLFAHLEEDEQK            | 62  | 4891  | 0.77 | 0.11 | 15  |
| 22 R07E4.6b;R07E4.6a;R07E4.6c | NLLFAHLEEDEQK            | 32  | 1684  | 0.80 | 0.14 | 17  |
| 1 R07E4.6b;R07E4.6a;R07E4.6c  | NLLFAHLEEDEQK            | 59  | 1358  | 0.85 | 0.19 | 23  |
| 1 R07E4.6b;R07E4.6a;R07E4.6c  | NLLFAHLEEDEQK            | 35  | 803   | 0.94 | 0.15 | 16  |
| 22 R07E4.6b;R07E4.6a;R07E4.6c | NLLFAHLEEDEQK            | 85  | 4059  | 0.95 | 0.14 | 14  |
| 7 R07E4.6b;R07E4.6a;R07E4.6c  | NLLFAHLEEDEQK            | 47  | 2143  | 0.96 | 0.16 | 17  |
| 7 R07E4.6b;R07E4.6a;R07E4.6c  | NLLFAHLEEDEQK            | 87  | 4809  | 0.96 | 0.10 | 11  |
| 10 R07E4.6b;R07E4.6a;R07E4.6c | MYDEFLSK                 | 27  | 1126  | 0.96 | 0.07 | 7   |
| 1 R07E4.6b;R07E4.6a;R07E4.6c  | RDVSNYSYVK               | 46  | 494   | 1.13 | 0.12 | 10  |
| 10 R07E4.6b;R07E4.6a;R07E4.6c | NLLFAHLEEDEQK            | 94  | 7098  | 1.29 | 0.09 | 7   |
| 22 R07E4.6b;R07E4.6a;R07E4.6c | NLLFAHLEEDEQK            | 80  | 5149  | 1.34 | 0.12 | 9   |
| 22 R07E4.6b;R07E4.6a;R07E4.6c | NLLFAHLEEDEQK            | 85  | 6131  | 1.42 | 0.10 | 7   |
| 22 R07E4.6b;R07E4.6a;R07E4.6c | NLLFAHLEEDEQK            | 51  | 6553  | 1.47 | 0.18 | 12  |
| 10 R07E4.6b;R07E4.6a;R07E4.6c | NLLFAHLEEDEQK            | 87  | 6042  | 1.48 | 0.11 | 7   |
| 10 R07E4.6b;R07E4.6a;R07E4.6c | NLLFAHLEEDEQK            | 34  | 1403  | 1.49 | 0.23 | 15  |
| 10 R07E4.6b;R07E4.6a;R07E4.6c | NLLFAHLEEDEQK            | 94  | 7160  | 1.52 | 0.11 | 8   |
| 10 R07E4.6b;R07E4.6a;R07E4.6c | NLLFAHLEEDEQK            | 81  | 6005  | 1.70 | 0.09 | 5   |
| 10 R07E4.6b;R07E4.6a;R07E4.6c | NLLFAHLEEDEQK            | 21  | 5703  | 2.44 | 0.17 | 7   |
| 22 R07E5.2                    | IADSFVLDK                | 53  | 5915  | 0.48 | 0.10 | 21  |
| 10 R07E5.2                    | IADSFVLDK                | 57  | 6162  | 0.72 | 0.18 | 25  |
| 10 R07E5.2                    | HGEVCPADWHEDSPTIKPGVATSK | 31  | 7058  | 0.74 | 0.15 | 21  |
| 22 R07E5.2                    | DGGLGDMDIPLADFNK         | 47  | 1774  | 0.74 | 0.22 | 30  |
| 10 R07E5.2                    | HGEVCPADWHEDSPTIKPGVATSK | 25  | 4457  | 0.84 | 0.27 | 32  |
| 7 R07E5.2                     | IADSFVLDK                | 57  | 5700  | 0.93 | 0.15 | 16  |
| 10 R07E5.2                    | HGEVCPADWHEDSPTIKPGVATSK | 29  | 7368  | 1.05 | 0.09 | 9   |
| 10 R07E5.2                    | HGEVCPADWHEDSPTIKPGVATSK | 13  | 5824  | 1.33 | 0.29 | 22  |
| 10 R07G3.3a;R07G3.3b;R07G3.3c | IATTAALVEK               | 33  | 907   | 0.68 | 0.19 | 28  |
| 1 R07H5.2a;R07H5.2b           | SHNPAHVQALEFK            | 22  | 8725  | 0.84 | 0.25 | 30  |
| 10 R07H5.2a;R07H5.2b          | SHNPAHVQALEFK            | 11  | 10473 | 1.35 | 0.12 | 9   |
| 22 R07H5.2a;R07H5.2b          | SHNPAHVQALEFK            | 14  | 11074 | 1.36 | 0.13 | 9   |
| 10 R07H5.2a;R07H5.2b          | SHNPAHVQALEFK            | 25  | 6975  | 2.61 | 0.18 | 7   |
| 7 R07H5.8                     | DQYGDLLASK               | 47  | 6039  | 0.25 | 0.09 | 34  |
| 7 R07H5.8                     | VTEFPVTRLPK              | 26  | 2151  | 0.25 | 0.31 | 121 |
| 10 R07H5.8                    | DQYGDLLASK               | 55  | 6339  | 0.30 | 0.08 | 28  |
| 10 R07H5.8                    | DQYGDLLASK               | 46  | 12221 | 0.31 | 0.09 | 29  |
| 7 R07H5.8                     | DQYGDLLASK               | 51  | 5703  | 0.31 | 0.17 | 56  |
| 10 R07H5.8                    | DQYGDLLASK               | 46  | 13258 | 0.32 | 0.09 | 29  |
| 10 R07H5.8                    | DQYGDLLASK               | 50  | 7448  | 0.33 | 0.06 | 17  |
| 1 R07H5.8                     | DQYGDLLASK               | 29  | 1018  | 0.34 | 0.13 | 37  |
| 10 R07H5.8                    | VTEFPVTRLPK              | 34  | 3483  | 0.35 | 0.13 | 37  |
| 22 R07H5.8                    | DQYGDLLASK               | 61  | 9378  | 0.36 | 0.15 | 41  |
| 10 R07H5.8                    | VTEFPVTRLPK              | 39  | 3796  | 0.36 | 0.10 | 27  |
| 1 R07H5.8                     | VTEFPVTRLPK              | 10  | 1462  | 0.38 | 0.11 | 28  |
| 22 R07H5.8                    | DQYGDLLASK               | 78  | 10417 | 0.39 | 0.08 | 21  |

|                               |                      |    |       |      |      |     |
|-------------------------------|----------------------|----|-------|------|------|-----|
| 7 R07H5.8                     | DQYGDLLASK           | 62 | 2607  | 0.42 | 0.11 | 25  |
| 1 R07H5.8                     | VTEFPVTRLPK          | 19 | 1503  | 0.43 | 0.09 | 20  |
| 10 R07H5.8                    | DQYGDLLASK           | 50 | 4354  | 0.44 | 0.17 | 37  |
| 7 R07H5.8                     | DQYGDLLASK           | 36 | 4509  | 0.46 | 0.14 | 31  |
| 10 R07H5.8                    | VTEFPVTRLPK          | 34 | 21963 | 0.48 | 0.22 | 46  |
| 10 R07H5.8                    | DQYGDLLASK           | 51 | 3030  | 0.51 | 0.05 | 11  |
| 7 R07H5.8                     | VTEFPVTRLPK          | 10 | 3000  | 0.55 | 0.17 | 30  |
| 7 R07H5.8                     | DQYGDLLASK           | 63 | 16015 | 0.55 | 0.09 | 16  |
| 22 R07H5.8                    | DQYGDLLASK           | 60 | 4371  | 0.58 | 0.12 | 21  |
| 10 R07H5.8                    | DQYGDLLASK           | 48 | 8007  | 0.58 | 0.08 | 13  |
| 22 R07H5.8                    | DQYGDLLASK           | 53 | 3445  | 0.59 | 0.08 | 13  |
| 7 R07H5.8                     | DQYGDLLASK           | 53 | 11782 | 0.59 | 0.06 | 10  |
| 7 R07H5.8                     | VTEFPVTRLPK          | 16 | 2805  | 0.60 | 0.22 | 37  |
| 7 R07H5.8                     | VTEFPVTRLPK          | 41 | 3023  | 0.60 | 0.27 | 45  |
| 22 R07H5.8                    | DQYGDLLASK           | 64 | 19445 | 0.61 | 0.06 | 10  |
| 10 R07H5.8                    | DQYGDLLASK           | 43 | 5795  | 0.62 | 0.08 | 13  |
| 22 R07H5.8                    | VTEFPVTRLPK          | 39 | 23086 | 0.66 | 0.11 | 17  |
| 22 R07H5.8                    | DQYGDLLASK           | 48 | 17712 | 0.66 | 0.09 | 14  |
| 10 R07H5.8                    | VTEFPVTRLPK          | 68 | 18156 | 0.66 | 0.13 | 19  |
| 1 R07H5.8                     | VTEFPVTRLPK          | 15 | 1400  | 0.68 | 0.24 | 35  |
| 22 R07H5.8                    | VTEFPVTRLPK          | 21 | 4301  | 0.70 | 0.16 | 22  |
| 22 R07H5.8                    | VTEFPVTRLPK          | 23 | 5335  | 0.73 | 0.31 | 43  |
| 7 R07H5.8                     | VTEFPVTRLPK          | 29 | 2833  | 0.74 | 0.29 | 39  |
| 22 R07H5.8                    | VTEFPVTRLPK          | 33 | 30791 | 0.78 | 0.08 | 11  |
| 7 R07H5.8                     | VTEFPVTRLPK          | 12 | 1383  | 0.79 | 0.28 | 36  |
| 7 R07H5.8                     | EAGVNVHYQINETVK      | 78 | 6899  | 0.86 | 0.14 | 17  |
| 10 R07H5.8                    | DQYGDLLASK           | 25 | 2475  | 0.91 | 0.12 | 13  |
| 22 R07H5.8                    | VTEFPVTRLPK          | 19 | 5078  | 0.99 | 0.16 | 16  |
| 22 R07H5.8                    | EAGVNVHYQINETVK      | 58 | 3731  | 1.01 | 0.12 | 12  |
| 10 R07H5.8                    | VTEFPVTRLPK          | 10 | 2883  | 1.02 | 0.14 | 14  |
| 22 R07H5.8                    | VTEFPVTRLPK          | 26 | 3577  | 1.04 | 0.21 | 21  |
| 10 R07H5.8                    | VTEFPVTRLPK          | 13 | 2696  | 1.04 | 0.16 | 16  |
| 7 R07H5.8                     | EAGVNVHYQINETVK      | 61 | 7620  | 1.10 | 0.10 | 9   |
| 22 R07H5.8                    | DQYGDLLASK           | 39 | 5280  | 1.11 | 0.08 | 7   |
| 22 R07H5.8                    | DQYGDLLASK           | 26 | 4704  | 1.20 | 0.10 | 8   |
| 10 R07H5.8                    | VTEFPVTRLPK          | 20 | 4915  | 1.21 | 0.10 | 9   |
| 10 R07H5.8                    | VTEFPVTRLPK          | 30 | 4682  | 1.26 | 0.11 | 8   |
| 22 R07H5.8                    | VTEFPVTRLPK          | 10 | 2897  | 1.36 | 0.37 | 27  |
| 7 R07H5.8                     | VTEFPVTRLPK          | 22 | 4424  | 1.43 | 0.10 | 7   |
| 7 R07H5.8                     | VTEFPVTRLPK          | 21 | 5237  | 1.56 | 0.09 | 6   |
| 22 R07H5.8                    | VTEFPVTRLPK          | 26 | 7999  | 1.61 | 0.16 | 10  |
| 22 R07H5.8                    | VTEFPVTRLPK          | 29 | 4190  | 1.97 | 0.13 | 7   |
| 1 R08D7.3                     | RNDAGFTFK            | 27 | 2397  | 0.82 | 0.16 | 19  |
| 22 R08E5.2a;R08E5.2c;R08E5.2b | TVLVEGTSGNLGIALAHIGK | 13 | 1519  | 1.86 | 0.24 | 13  |
| 7 R09E12.3                    | AAVYFEEK             | 19 | 3228  | 0.21 | 0.46 | 223 |
| 10 R09E12.3                   | AAVYFEEK             | 20 | 2330  | 0.23 | 0.40 | 170 |
| 10 R09E12.3                   | AAVYFEEK             | 28 | 2658  | 0.36 | 0.41 | 113 |
| 22 R09E12.3                   | AAVYFEEK             | 39 | 2471  | 0.39 | 0.44 | 114 |
| 22 R09E12.3                   | AAVYFEEK             | 15 | 1753  | 0.41 | 0.56 | 135 |
| 10 R09E12.3                   | AAVYFEEK             | 17 | 1958  | 0.58 | 0.04 | 7   |
| 22 R09E12.3                   | AAVYFEEK             | 28 | 2885  | 0.60 | 0.26 | 43  |
| 22 R09E12.3                   | AMSRAGNAFQK          | 14 | 10974 | 0.63 | 0.13 | 20  |
| 22 R09E12.3                   | AAERLAYINPELAQEEK    | 27 | 1573  | 0.93 | 0.25 | 27  |
| 22 R09E12.3                   | AAERLAYINPELAQEEK    | 31 | 1246  | 1.35 | 0.18 | 13  |
| 22 R09E12.3                   | AMSRAGNAFQK          | 10 | 2327  | 4.33 | 0.27 | 6   |
| 10 R09H10.5                   | NMILPNSYLLK          | 10 | 596   | 0.72 | 0.08 | 11  |
| 10 R09H10.5                   | NMILPNSYLLK          | 14 | 1287  | 0.73 | 0.08 | 10  |
| 10 R09H10.5                   | DVFLAAFQK            | 28 | 601   | 0.73 | 0.04 | 5   |
| 10 R09H10.5                   | NMILPNSYLLK          | 12 | 934   | 0.77 | 0.16 | 21  |
| 22 R09H10.5                   | DVFLAAFQK            | 33 | 660   | 0.79 | 0.20 | 25  |
| 22 R09H10.5                   | DVFLAAFQK            | 52 | 894   | 0.99 | 0.13 | 13  |
| 22 R09H10.5                   | DVFLAAFQK            | 11 | 595   | 1.01 | 0.14 | 14  |
| 22 R09H10.5                   | DVFLAAFQK            | 15 | 544   | 1.93 | 0.13 | 7   |
| 1 R102.4b;R102.4a;R102.4c     | GLGAPVGSIVVGPK       | 28 | 1024  | 0.98 | 0.11 | 11  |
| 1 R102.4b;R102.4a;R102.4c     | GLGAPVGSIVVGPK       | 20 | 1392  | 1.20 | 0.24 | 20  |
| 10 R102.4b;R102.4a;R102.4c    | GLGAPVGSIVVGPK       | 17 | 1306  | 1.66 | 0.18 | 11  |
| 10 R107.7                     | DVLPGELARLEK         | 17 | 5075  | 0.36 | 0.32 | 90  |
| 10 R107.7                     | DVLPGELARLEK         | 13 | 6674  | 0.40 | 0.19 | 49  |
| 1 R107.7                      | NGEHYVIGDK           | 53 | 6013  | 0.45 | 0.12 | 26  |
| 1 R107.7                      | NGEHYVIGDK           | 40 | 5389  | 0.46 | 0.25 | 54  |
| 10 R107.7                     | DVLPGELARLEK         | 16 | 8826  | 0.47 | 0.13 | 28  |
| 22 R107.7                     | DVLPGELARLEK         | 12 | 4027  | 0.54 | 0.10 | 19  |
| 22 R107.7                     | DVLPGELARLEK         | 27 | 31895 | 0.57 | 0.10 | 17  |
| 22 R107.7                     | DVLPGELARLEK         | 28 | 24071 | 0.57 | 0.10 | 18  |
| 10 R107.7                     | YTTMIYRNYEDGK        | 36 | 4136  | 0.61 | 0.12 | 19  |
| 22 R107.7                     | LFHTYK               | 18 | 5971  | 0.65 | 0.11 | 17  |
| 22 R107.7                     | LFHTYK               | 14 | 7648  | 0.66 | 0.09 | 14  |
| 1 R107.7                      | LFHTYK               | 12 | 2928  | 0.70 | 0.06 | 9   |
| 7 R107.7                      | DVLPGELARLEK         | 10 | 3223  | 0.70 | 0.14 | 20  |
| 7 R107.7                      | NGEHYVIGDK           | 48 | 4188  | 0.70 | 0.10 | 14  |
| 7 R107.7                      | NGEHYVIGDK           | 41 | 3967  | 0.74 | 0.09 | 12  |
| 10 R107.7                     | DVLPGELARLEK         | 19 | 4678  | 0.85 | 0.45 | 53  |
| 10 R107.7                     | NGEHYVIGDK           | 52 | 8025  | 1.06 | 0.11 | 10  |
| 22 R107.7                     | YTTMIYRNYEDGK        | 25 | 3933  | 1.06 | 0.15 | 15  |
| 22 R107.7                     | NGEHYVIGDK           | 49 | 8095  | 1.13 | 0.07 | 6   |
| 10 R107.7                     | NGEHYVIGDK           | 39 | 8873  | 1.17 | 0.08 | 7   |
| 22 R107.7                     | QVAYEDHRVTYEQWADIKPK | 17 | 18852 | 1.21 | 0.13 | 11  |
| 22 R107.7                     | DVLPGELARLEK         | 12 | 5389  | 1.27 | 0.17 | 13  |
| 22 R107.7                     | LFHTYK               | 18 | 46776 | 1.39 | 0.10 | 7   |
| 10 R107.7                     | LFHTYK               | 12 | 68042 | 1.66 | 0.13 | 8   |
| 22 R107.7                     | DVLPGELARLEK         | 11 | 10568 | 1.68 | 0.15 | 9   |
| 22 R10H10.1                   | RVFFGEDFVTVTK        | 37 | 1593  | 0.82 | 0.14 | 17  |
| 22 R10H10.1                   | RVFFGEDFVTVTK        | 17 | 1571  | 0.91 | 0.16 | 17  |
| 22 R10H10.1                   | RVFFGEDFVTVTK        | 27 | 1392  | 0.92 | 0.17 | 18  |
| 1 R10H10.1                    | FLPGQQLLPDASK        | 11 | 1432  | 0.97 | 0.11 | 11  |
| 1 R10H10.1                    | TYDFSSAATAK          | 45 | 1197  | 1.27 | 0.17 | 13  |
| 1 R10H10.1                    | TYDFSSAATAK          | 30 | 1400  | 1.37 | 0.12 | 9   |
| 10 R119.3                     | VGGDVTAFSLDVANAEHRK  | 11 | 2947  | 0.70 | 0.28 | 40  |
| 1 R11A5.4a;R11A5.4d;R11A5.4b  | VQRFIAEK             | 10 | 731   | 0.28 | 0.15 | 54  |
| 1 R11A5.4a;R11A5.4d;R11A5.4b  | YLQHWLDLK            | 11 | 1482  | 0.52 | 0.26 | 49  |
| 1 R11A5.4a;R11A5.4d;R11A5.4b  | TNPMAVATFQK          | 10 | 954   | 0.65 | 0.16 | 25  |

|    |                                     |                            |    |       |      |      |     |
|----|-------------------------------------|----------------------------|----|-------|------|------|-----|
| 1  | R11A5.4a;R11A5.4d;R11A5.4b          | TNPMAVATFQK                | 15 | 1847  | 0.92 | 0.13 | 14  |
| 1  | R11A5.4a;R11A5.4d;R11A5.4b          | VQRFIAEK                   | 29 | 7073  | 1.02 | 0.24 | 24  |
| 1  | R11A5.4a;R11A5.4d;R11A5.4b          | TNPMAVATFQK                | 12 | 2326  | 1.05 | 0.13 | 12  |
| 1  | R11A5.4a;R11A5.4d;R11A5.4b          | TNPMAVATFQK                | 25 | 3325  | 1.08 | 0.15 | 14  |
| 1  | R11A5.4a;R11A5.4d;R11A5.4b          | VQRFIAEK                   | 29 | 6372  | 1.19 | 0.23 | 19  |
| 1  | R11A5.4a;R11A5.4d;R11A5.4b          | TNPMAVATFQK                | 21 | 3816  | 1.24 | 0.10 | 8   |
| 1  | R11A5.4a;R11A5.4d;R11A5.4b          | YLQHWLDLK                  | 13 | 701   | 1.27 | 0.25 | 20  |
| 1  | R11A5.4a;R11A5.4d;R11A5.4b          | NVDITTWLGEK                | 43 | 1101  | 1.39 | 0.19 | 14  |
| 1  | R11A5.4a;R11A5.4d;R11A5.4b          | NVDITTWLGEK                | 51 | 1114  | 1.40 | 0.18 | 13  |
| 1  | R11A5.4a;R11A5.4d;R11A5.4b          | NVDITTWLGEK                | 42 | 1183  | 1.41 | 0.17 | 12  |
| 1  | R11A5.4a;R11A5.4d;R11A5.4b          | VQRFIAEK                   | 15 | 1146  | 1.47 | 0.12 | 8   |
| 1  | R11A5.4a;R11A5.4d;R11A5.4b          | VQRFIAEK                   | 14 | 1714  | 1.48 | 0.09 | 6   |
| 1  | R11A5.4a;R11A5.4d;R11A5.4b          | RLGHVPILK                  | 19 | 16324 | 1.62 | 0.25 | 16  |
| 1  | R11A5.4a;R11A5.4d;R11A5.4b          | RLGHVPILK                  | 15 | 25621 | 1.63 | 0.09 | 5   |
| 1  | R11A5.4a;R11A5.4d;R11A5.4b          | TNPMAVATFQK                | 36 | 2427  | 1.88 | 0.22 | 12  |
| 1  | R11A5.4a;R11A5.4d;R11A5.4b          | RLGHVPILK                  | 20 | 25644 | 2.12 | 0.06 | 3   |
| 1  | R11A5.4a;R11A5.4d;R11A5.4b          | RLGHVPILK                  | 10 | 1926  | 2.22 | 0.14 | 6   |
| 1  | R11A5.4a;R11A5.4d;R11A5.4b          | RLGHVPILK                  | 17 | 16571 | 3.08 | 0.13 | 4   |
| 10 | R11A5.4a;R11A5.4d;R11A5.4b;R11A5.4c | VQRFIAEK                   | 27 | 8587  | 0.10 | 0.15 | 139 |
| 10 | R11A5.4a;R11A5.4d;R11A5.4b;R11A5.4c | YLQHWLDLK                  | 31 | 2132  | 0.13 | 0.35 | 277 |
| 10 | R11A5.4a;R11A5.4d;R11A5.4b;R11A5.4c | RLGHVPILK                  | 16 | 23188 | 0.15 | 0.24 | 161 |
| 10 | R11A5.4a;R11A5.4d;R11A5.4b;R11A5.4c | RLGHVPILK                  | 18 | 16178 | 0.18 | 0.38 | 213 |
| 10 | R11A5.4a;R11A5.4d;R11A5.4b;R11A5.4c | TNPMAVATFQK                | 30 | 3383  | 0.21 | 0.22 | 101 |
| 22 | R11A5.4a;R11A5.4d;R11A5.4b;R11A5.4c | IYHVNWFRK                  | 14 | 2962  | 0.22 | 0.40 | 178 |
| 22 | R11A5.4a;R11A5.4d;R11A5.4b;R11A5.4c | YLQHWLDLK                  | 19 | 1721  | 0.25 | 0.12 | 48  |
| 10 | R11A5.4a;R11A5.4d;R11A5.4b;R11A5.4c | NVDITTWLGEK                | 60 | 1141  | 0.26 | 0.17 | 67  |
| 10 | R11A5.4a;R11A5.4d;R11A5.4b;R11A5.4c | YLQHWLDLK                  | 28 | 2786  | 0.28 | 0.29 | 102 |
| 22 | R11A5.4a;R11A5.4d;R11A5.4b;R11A5.4c | YLQHWLDLK                  | 15 | 1536  | 0.29 | 0.29 | 98  |
| 10 | R11A5.4a;R11A5.4d;R11A5.4b;R11A5.4c | YLQHWLDLK                  | 21 | 2994  | 0.34 | 0.10 | 30  |
| 22 | R11A5.4a;R11A5.4d;R11A5.4b;R11A5.4c | YLQHWLDLK                  | 13 | 1926  | 0.36 | 0.27 | 73  |
| 10 | R11A5.4a;R11A5.4d;R11A5.4b;R11A5.4c | YLQHWLDLK                  | 23 | 2538  | 0.40 | 0.21 | 53  |
| 10 | R11A5.4a;R11A5.4d;R11A5.4b;R11A5.4c | LIERGMLSK                  | 15 | 2619  | 0.42 | 0.41 | 97  |
| 10 | R11A5.4a;R11A5.4d;R11A5.4b;R11A5.4c | SEATAAAEFTGK               | 30 | 4398  | 0.44 | 0.36 | 82  |
| 10 | R11A5.4a;R11A5.4d;R11A5.4b;R11A5.4c | SEATAAAEFTGK               | 48 | 7944  | 0.46 | 0.31 | 69  |
| 7  | R11A5.4a;R11A5.4d;R11A5.4b;R11A5.4c | RLGHVPILK                  | 13 | 10490 | 0.46 | 0.29 | 62  |
| 10 | R11A5.4a;R11A5.4d;R11A5.4b;R11A5.4c | SEATAAAEFTGK               | 29 | 5729  | 0.47 | 0.40 | 85  |
| 10 | R11A5.4a;R11A5.4d;R11A5.4b;R11A5.4c | YLQHWLDLK                  | 20 | 1056  | 0.47 | 0.19 | 40  |
| 10 | R11A5.4a;R11A5.4d;R11A5.4b;R11A5.4c | YLQHWLDLK                  | 11 | 1105  | 0.47 | 0.10 | 22  |
| 10 | R11A5.4a;R11A5.4d;R11A5.4b;R11A5.4c | NVDITTWLGEK                | 34 | 793   | 0.48 | 0.18 | 37  |
| 22 | R11A5.4a;R11A5.4d;R11A5.4b;R11A5.4c | SEATAAAEFTGK               | 41 | 3138  | 0.49 | 0.38 | 78  |
| 7  | R11A5.4a;R11A5.4d;R11A5.4b;R11A5.4c | IYHVNWFRK                  | 14 | 2258  | 0.51 | 0.10 | 19  |
| 22 | R11A5.4a;R11A5.4d;R11A5.4b;R11A5.4c | YLQHWLDLK                  | 17 | 1405  | 0.51 | 0.46 | 91  |
| 7  | R11A5.4a;R11A5.4d;R11A5.4b;R11A5.4c | RLGHVPILK                  | 19 | 1674  | 0.51 | 0.13 | 26  |
| 10 | R11A5.4a;R11A5.4d;R11A5.4b;R11A5.4c | SEATAAAEFTGK               | 40 | 5217  | 0.51 | 0.25 | 49  |
| 22 | R11A5.4a;R11A5.4d;R11A5.4b;R11A5.4c | LIERGMLSK                  | 12 | 1555  | 0.52 | 0.23 | 44  |
| 22 | R11A5.4a;R11A5.4d;R11A5.4b;R11A5.4c | SEATAAAEFTGK               | 37 | 2648  | 0.52 | 0.32 | 60  |
| 22 | R11A5.4a;R11A5.4d;R11A5.4b;R11A5.4c | YLQHWLDLK                  | 19 | 2505  | 0.53 | 0.19 | 36  |
| 7  | R11A5.4a;R11A5.4d;R11A5.4b;R11A5.4c | SEATAAAEFTGK               | 22 | 3312  | 0.54 | 0.28 | 52  |
| 22 | R11A5.4a;R11A5.4d;R11A5.4b;R11A5.4c | RLGHVPILK                  | 11 | 4046  | 0.54 | 0.16 | 30  |
| 22 | R11A5.4a;R11A5.4d;R11A5.4b;R11A5.4c | IYHVNWFRK                  | 17 | 4379  | 0.54 | 0.23 | 43  |
| 22 | R11A5.4a;R11A5.4d;R11A5.4b;R11A5.4c | YLQHWLDLK                  | 27 | 2632  | 0.55 | 0.17 | 31  |
| 22 | R11A5.4a;R11A5.4d;R11A5.4b;R11A5.4c | YLQHWLDLK                  | 19 | 1736  | 0.55 | 0.14 | 26  |
| 10 | R11A5.4a;R11A5.4d;R11A5.4b;R11A5.4c | LIERGMLSK                  | 25 | 2330  | 0.56 | 0.31 | 56  |
| 7  | R11A5.4a;R11A5.4d;R11A5.4b;R11A5.4c | YLQHWLDLK                  | 16 | 1879  | 0.57 | 0.13 | 23  |
| 7  | R11A5.4a;R11A5.4d;R11A5.4b;R11A5.4c | SEATAAAEFTGK               | 27 | 1700  | 0.58 | 0.15 | 26  |
| 10 | R11A5.4a;R11A5.4d;R11A5.4b;R11A5.4c | YLQHWLDLK                  | 24 | 1676  | 0.59 | 0.16 | 28  |
| 22 | R11A5.4a;R11A5.4d;R11A5.4b;R11A5.4c | SEATAAAEFTGK               | 38 | 2031  | 0.59 | 0.09 | 16  |
| 22 | R11A5.4a;R11A5.4d;R11A5.4b;R11A5.4c | LIERGMLSK                  | 14 | 1316  | 0.63 | 0.30 | 48  |
| 22 | R11A5.4a;R11A5.4d;R11A5.4b;R11A5.4c | SEATAAAEFTGK               | 62 | 6787  | 0.66 | 0.18 | 28  |
| 10 | R11A5.4a;R11A5.4d;R11A5.4b;R11A5.4c | YLQHWLDLK                  | 21 | 1395  | 0.67 | 0.11 | 17  |
| 10 | R11A5.4a;R11A5.4d;R11A5.4b;R11A5.4c | RLGHVPILK                  | 11 | 43548 | 0.69 | 0.14 | 20  |
| 10 | R11A5.4a;R11A5.4d;R11A5.4b;R11A5.4c | YLQHWLDLK                  | 21 | 1536  | 0.69 | 0.15 | 22  |
| 22 | R11A5.4a;R11A5.4d;R11A5.4b;R11A5.4c | RLGHVPILK                  | 11 | 3068  | 0.69 | 0.22 | 32  |
| 7  | R11A5.4a;R11A5.4d;R11A5.4b;R11A5.4c | LIERGMLSK                  | 11 | 1748  | 0.70 | 0.16 | 22  |
| 22 | R11A5.4a;R11A5.4d;R11A5.4b;R11A5.4c | FGEDGRLYAINPEAGFFGVAPGTSNK | 40 | 4297  | 0.70 | 0.14 | 20  |
| 22 | R11A5.4a;R11A5.4d;R11A5.4b;R11A5.4c | VQRFIAEK                   | 35 | 15120 | 0.73 | 0.06 | 8   |
| 22 | R11A5.4a;R11A5.4d;R11A5.4b;R11A5.4c | RLGHVPILK                  | 14 | 22172 | 0.78 | 0.15 | 19  |
| 22 | R11A5.4a;R11A5.4d;R11A5.4b;R11A5.4c | LIERGMLSK                  | 12 | 2733  | 0.78 | 0.16 | 20  |
| 7  | R11A5.4a;R11A5.4d;R11A5.4b;R11A5.4c | YLQHWLDLK                  | 18 | 3207  | 0.80 | 0.14 | 18  |
| 22 | R11A5.4a;R11A5.4d;R11A5.4b;R11A5.4c | RLGHVPILK                  | 16 | 3889  | 0.80 | 0.07 | 9   |
| 10 | R11A5.4a;R11A5.4d;R11A5.4b;R11A5.4c | TNLAMLEPTLPGWK             | 17 | 1069  | 0.81 | 0.18 | 23  |
| 22 | R11A5.4a;R11A5.4d;R11A5.4b;R11A5.4c | LIERGMLSK                  | 12 | 1957  | 0.82 | 0.20 | 25  |
| 22 | R11A5.4a;R11A5.4d;R11A5.4b;R11A5.4c | NVDITTWLGEK                | 25 | 774   | 0.84 | 0.29 | 35  |
| 22 | R11A5.4a;R11A5.4d;R11A5.4b;R11A5.4c | VQRFIAEK                   | 26 | 16336 | 0.84 | 0.15 | 17  |
| 7  | R11A5.4a;R11A5.4d;R11A5.4b;R11A5.4c | GDFHLLPAK                  | 21 | 2172  | 0.85 | 0.07 | 9   |
| 22 | R11A5.4a;R11A5.4d;R11A5.4b;R11A5.4c | IYHVNWFRK                  | 11 | 4853  | 0.85 | 0.30 | 36  |
| 10 | R11A5.4a;R11A5.4d;R11A5.4b;R11A5.4c | RLGHVPILK                  | 14 | 44347 | 0.86 | 0.20 | 23  |
| 22 | R11A5.4a;R11A5.4d;R11A5.4b;R11A5.4c | LIERGMLSK                  | 14 | 2910  | 0.89 | 0.08 | 9   |
| 22 | R11A5.4a;R11A5.4d;R11A5.4b;R11A5.4c | LIERGMLSK                  | 22 | 2429  | 0.89 | 0.21 | 24  |
| 10 | R11A5.4a;R11A5.4d;R11A5.4b;R11A5.4c | RLGHVPILK                  | 11 | 5169  | 0.89 | 0.12 | 13  |
| 10 | R11A5.4a;R11A5.4d;R11A5.4b;R11A5.4c | NVDITTWLGEK                | 62 | 1618  | 0.90 | 0.16 | 18  |
| 10 | R11A5.4a;R11A5.4d;R11A5.4b;R11A5.4c | NVDITTWLGEK                | 29 | 925   | 0.90 | 0.22 | 25  |
| 22 | R11A5.4a;R11A5.4d;R11A5.4b;R11A5.4c | YLQHWLDLK                  | 10 | 2038  | 0.91 | 0.19 | 21  |
| 22 | R11A5.4a;R11A5.4d;R11A5.4b;R11A5.4c | SEATAAAEFTGK               | 21 | 4541  | 0.91 | 0.12 | 13  |
| 10 | R11A5.4a;R11A5.4d;R11A5.4b;R11A5.4c | YLQHWLDLK                  | 11 | 3367  | 0.92 | 0.12 | 13  |
| 22 | R11A5.4a;R11A5.4d;R11A5.4b;R11A5.4c | FGEDGRLYAINPEAGFFGVAPGTSNK | 50 | 4227  | 0.94 | 0.15 | 16  |
| 10 | R11A5.4a;R11A5.4d;R11A5.4b;R11A5.4c | NVDITTWLGEK                | 61 | 1732  | 0.94 | 0.14 | 15  |
| 22 | R11A5.4a;R11A5.4d;R11A5.4b;R11A5.4c | IYHVNWFRK                  | 10 | 2684  | 0.95 | 0.20 | 21  |
| 7  | R11A5.4a;R11A5.4d;R11A5.4b;R11A5.4c | SEATAAAEFTGK               | 22 | 1834  | 0.96 | 0.34 | 36  |
| 22 | R11A5.4a;R11A5.4d;R11A5.4b;R11A5.4c | RLGHVPILK                  | 12 | 3653  | 0.97 | 0.12 | 12  |
| 7  | R11A5.4a;R11A5.4d;R11A5.4b;R11A5.4c | TNPMAVATFQK                | 11 | 4422  | 0.99 | 0.23 | 23  |
| 10 | R11A5.4a;R11A5.4d;R11A5.4b;R11A5.4c | YLQHWLDLK                  | 10 | 1099  | 0.99 | 0.15 | 15  |
| 10 | R11A5.4a;R11A5.4d;R11A5.4b;R11A5.4c | NVDITTWLGEK                | 40 | 938   | 0.99 | 0.14 | 14  |
| 22 | R11A5.4a;R11A5.4d;R11A5.4b;R11A5.4c | LIERGMLSK                  | 12 | 3066  | 1.01 | 0.17 | 17  |
| 22 | R11A5.4a;R11A5.4d;R11A5.4b;R11A5.4c | LIERGMLSK                  | 18 | 3395  | 1.01 | 0.15 | 15  |
| 10 | R11A5.4a;R11A5.4d;R11A5.4b;R11A5.4c | RLGHVPILK                  | 11 | 54372 | 1.01 | 0.13 | 13  |
| 22 | R11A5.4a;R11A5.4d;R11A5.4b;R11A5.4c | YLQHWLDLK                  | 19 | 2848  | 1.02 | 0.06 | 6   |
| 22 | R11A5.4a;R11A5.4d;R11A5.4b;R11A5.4c | YLQHWLDLK                  | 16 | 3072  | 1.02 | 0.16 | 16  |
| 10 | R11A5.4a;R11A5.4d;R11A5.4b;R11A5.4c | TNLAMLEPTLPGWK             | 13 | 1054  | 1.02 | 0.23 | 22  |
| 7  | R11A5.4a;R11A5.4d;R11A5.4b;R11A5.4c | IYHVNWFRK                  | 11 | 3732  | 1.05 | 0.18 | 17  |
| 10 | R11A5.4a;R11A5.4d;R11A5.4b;R11A5.4c | YLQHWLDLK                  | 14 | 3586  | 1.06 | 0.09 | 8   |

|    |                                     |                      |    |        |      |      |     |
|----|-------------------------------------|----------------------|----|--------|------|------|-----|
| 7  | R11A5.4a;R11A5.4d;R11A5.4b;R11A5.4c | TNPMAVATFQK          | 14 | 1844   | 1.06 | 0.29 | 27  |
| 22 | R11A5.4a;R11A5.4d;R11A5.4b;R11A5.4c | LIERGMLSK            | 18 | 2195   | 1.07 | 0.16 | 15  |
| 22 | R11A5.4a;R11A5.4d;R11A5.4b;R11A5.4c | TNLAMLEPTLPGWK       | 43 | 1271   | 1.07 | 0.07 | 6   |
| 22 | R11A5.4a;R11A5.4d;R11A5.4b;R11A5.4c | YLQHWLDLK            | 11 | 2448   | 1.09 | 0.11 | 10  |
| 22 | R11A5.4a;R11A5.4d;R11A5.4b;R11A5.4c | NVDITTWLGEK          | 30 | 1046   | 1.11 | 0.15 | 13  |
| 22 | R11A5.4a;R11A5.4d;R11A5.4b;R11A5.4c | RLGHVPILK            | 14 | 1209   | 1.16 | 0.04 | 3   |
| 10 | R11A5.4a;R11A5.4d;R11A5.4b;R11A5.4c | NVDITTWLGEK          | 13 | 484    | 1.17 | 0.08 | 6   |
| 22 | R11A5.4a;R11A5.4d;R11A5.4b;R11A5.4c | VQRFIAEK             | 15 | 4355   | 1.20 | 0.08 | 7   |
| 22 | R11A5.4a;R11A5.4d;R11A5.4b;R11A5.4c | TNLAMLEPTLPGWK       | 16 | 681    | 1.21 | 0.16 | 13  |
| 10 | R11A5.4a;R11A5.4d;R11A5.4b;R11A5.4c | RLGHVPILK            | 10 | 3293   | 1.22 | 0.11 | 9   |
| 7  | R11A5.4a;R11A5.4d;R11A5.4b;R11A5.4c | TNPMAVATFQK          | 18 | 2547   | 1.24 | 0.13 | 10  |
| 22 | R11A5.4a;R11A5.4d;R11A5.4b;R11A5.4c | NVDITTWLGEK          | 21 | 719    | 1.27 | 0.10 | 8   |
| 7  | R11A5.4a;R11A5.4d;R11A5.4b;R11A5.4c | NVDITTWLGEK          | 44 | 962    | 1.29 | 0.25 | 19  |
| 10 | R11A5.4a;R11A5.4d;R11A5.4b;R11A5.4c | RLGHVPILK            | 10 | 3630   | 1.29 | 0.12 | 9   |
| 22 | R11A5.4a;R11A5.4d;R11A5.4b;R11A5.4c | NVDITTWLGEK          | 14 | 767    | 1.29 | 0.25 | 19  |
| 22 | R11A5.4a;R11A5.4d;R11A5.4b;R11A5.4c | SEATAAAEFTGK         | 24 | 2093   | 1.32 | 0.44 | 34  |
| 22 | R11A5.4a;R11A5.4d;R11A5.4b;R11A5.4c | RLGHVPILK            | 18 | 1336   | 1.38 | 0.09 | 7   |
| 22 | R11A5.4a;R11A5.4d;R11A5.4b;R11A5.4c | RLGHVPILK            | 11 | 1531   | 1.42 | 0.13 | 9   |
| 22 | R11A5.4a;R11A5.4d;R11A5.4b;R11A5.4c | NVDITTWLGEK          | 22 | 751    | 1.44 | 0.20 | 14  |
| 22 | R11A5.4a;R11A5.4d;R11A5.4b;R11A5.4c | RLGHVPILK            | 12 | 4982   | 1.88 | 0.23 | 12  |
| 22 | R11A5.4a;R11A5.4d;R11A5.4b;R11A5.4c | TNPMAVATFQK          | 20 | 3217   | 1.96 | 0.18 | 9   |
| 10 | R11A5.4a;R11A5.4d;R11A5.4b;R11A5.4c | YLQHWLDLK            | 18 | 1385   | 1.97 | 0.26 | 13  |
| 10 | R11A5.4a;R11A5.4d;R11A5.4b;R11A5.4c | RLGHVPILK            | 14 | 3122   | 2.02 | 0.12 | 6   |
| 22 | R11A5.4a;R11A5.4d;R11A5.4b;R11A5.4c | RLGHVPILK            | 12 | 4586   | 2.19 | 0.18 | 8   |
| 22 | R11A5.4a;R11A5.4d;R11A5.4b;R11A5.4c | RLGHVPILK            | 11 | 45608  | 2.19 | 0.19 | 9   |
| 10 | R11A5.4a;R11A5.4d;R11A5.4b;R11A5.4c | RLGHVPILK            | 10 | 2580   | 2.22 | 0.10 | 4   |
| 22 | R11A5.4a;R11A5.4d;R11A5.4b;R11A5.4c | RLGHVPILK            | 13 | 64673  | 2.22 | 0.17 | 8   |
| 10 | R11A5.4a;R11A5.4d;R11A5.4b;R11A5.4c | YLQHWLDLK            | 27 | 4192   | 2.27 | 0.17 | 7   |
| 10 | R11A5.4a;R11A5.4d;R11A5.4b;R11A5.4c | TNLAMLEPTLPGWK       | 11 | 557    | 2.30 | 0.19 | 8   |
| 10 | R11A5.4a;R11A5.4d;R11A5.4b;R11A5.4c | NVDITTWLGEK          | 22 | 1067   | 2.34 | 0.17 | 7   |
| 10 | R11A5.4a;R11A5.4d;R11A5.4b;R11A5.4c | YLQHWLDLK            | 18 | 2601   | 2.43 | 0.17 | 7   |
| 10 | R11A5.4a;R11A5.4d;R11A5.4b;R11A5.4c | RLGHVPILK            | 17 | 5040   | 2.50 | 0.13 | 5   |
| 10 | R11A5.4a;R11A5.4d;R11A5.4b;R11A5.4c | TNLAMLEPTLPGWK       | 22 | 685    | 2.62 | 0.21 | 8   |
| 10 | R11A5.4a;R11A5.4d;R11A5.4b;R11A5.4c | NVDITTWLGEK          | 64 | 2547   | 2.73 | 0.14 | 5   |
| 10 | R11A5.4a;R11A5.4d;R11A5.4b;R11A5.4c | RLGHVPILK            | 16 | 6348   | 2.77 | 0.11 | 4   |
| 10 | R11A5.4a;R11A5.4d;R11A5.4b;R11A5.4c | VQRFIAEK             | 22 | 26482  | 2.80 | 0.11 | 4   |
| 10 | R11A5.4a;R11A5.4d;R11A5.4b;R11A5.4c | TNLAMLEPTLPGWK       | 17 | 2017   | 2.81 | 0.14 | 5   |
| 10 | R11A5.4a;R11A5.4d;R11A5.4b;R11A5.4c | VQRFIAEK             | 29 | 20594  | 2.97 | 0.15 | 5   |
| 10 | R11A5.4a;R11A5.4d;R11A5.4b;R11A5.4c | LIERGMLSK            | 18 | 4305   | 3.10 | 0.08 | 3   |
| 10 | R11A5.4a;R11A5.4d;R11A5.4b;R11A5.4c | TNLAMLEPTLPGWK       | 17 | 1759   | 3.14 | 0.14 | 4   |
| 10 | R11A5.4a;R11A5.4d;R11A5.4b;R11A5.4c | LIERGMLSK            | 37 | 2466   | 3.44 | 0.13 | 4   |
| 10 | R11A5.4a;R11A5.4d;R11A5.4b;R11A5.4c | IYHVNWFRK            | 18 | 4317   | 4.38 | 0.08 | 2   |
| 10 | R11A5.4a;R11A5.4d;R11A5.4b;R11A5.4c | RLGHVPILK            | 17 | 153718 | 4.61 | 0.08 | 2   |
| 10 | R11A5.4a;R11A5.4d;R11A5.4b;R11A5.4c | RLGHVPILK            | 13 | 78279  | 5.10 | 0.09 | 2   |
| 10 | R11A5.4a;R11A5.4d;R11A5.4b;R11A5.4c | RLGHVPILK            | 14 | 69305  | 6.21 | 0.30 | 5   |
| 22 | R11A8.6                             | YTSEVPDYQGVYVK       | 15 | 998    | 0.32 | 0.33 | 101 |
| 10 | R11A8.6                             | LNDIVSATGTPIK        | 29 | 959    | 0.47 | 0.20 | 41  |
| 10 | R11A8.6                             | YTSEVPDYQGVYVK       | 16 | 1688   | 0.54 | 0.11 | 20  |
| 10 | R11A8.6                             | YTSEVPDYQGVYVK       | 27 | 1544   | 0.58 | 0.18 | 30  |
| 10 | R11A8.6                             | LNDIVSATGTPIK        | 12 | 760    | 0.64 | 0.13 | 21  |
| 10 | R11A8.6                             | LNDIVSATGTPIK        | 12 | 557    | 0.96 | 0.22 | 23  |
| 10 | R11A8.6                             | YTSEVPDYQGVYVK       | 21 | 999    | 1.14 | 0.15 | 13  |
| 22 | R11D1.11                            | PANYDFTDK            | 18 | 1851   | 2.46 | 0.10 | 4   |
| 10 | R11D1.11                            | PANYDFTDK            | 20 | 3330   | 3.20 | 0.34 | 11  |
| 10 | R11D1.11                            | PANYDFTDK            | 18 | 3922   | 3.60 | 0.13 | 4   |
| 10 | R11E3.8                             | DLYGDLAQIPIPTQGRIEK  | 27 | 3144   | 0.28 | 0.12 | 43  |
| 10 | R11E3.8                             | DLYGDLAQIPIPTQGRIEK  | 42 | 5845   | 0.40 | 0.13 | 32  |
| 10 | R11E3.8                             | DLYGDLAQIPIPTQGRIEK  | 32 | 3197   | 0.41 | 0.07 | 17  |
| 22 | R11E3.8                             | DLYGDLAQIPIPTQGRIEK  | 28 | 4119   | 0.63 | 0.14 | 23  |
| 1  | R11E3.8                             | DVHNAVLTVLDK         | 28 | 1816   | 0.64 | 0.10 | 16  |
| 22 | R11E3.8                             | DLYGDLAQIPIPTQGRIEK  | 47 | 5161   | 0.67 | 0.12 | 18  |
| 1  | R11E3.8                             | DVHNAVLTVLDK         | 43 | 2344   | 0.88 | 0.11 | 12  |
| 10 | R11E3.8                             | DVHNAVLTVLDK         | 50 | 4348   | 0.91 | 0.18 | 20  |
| 10 | R11E3.8                             | DVHNAVLTVLDK         | 42 | 5374   | 0.98 | 0.12 | 13  |
| 22 | R11E3.8                             | DVHNAVLTVLDK         | 32 | 4769   | 1.07 | 0.14 | 13  |
| 22 | R11E3.8                             | DVHNAVLTVLDK         | 41 | 5977   | 1.14 | 0.12 | 11  |
| 1  | R11E3.8                             | LTRQQRVSLIGK         | 13 | 3332   | 1.28 | 0.26 | 20  |
| 1  | R11E3.8                             | RIIVPIVK             | 44 | 6984   | 1.29 | 0.06 | 5   |
| 1  | R11E3.8                             | RIIVPIVK             | 44 | 10066  | 1.59 | 0.14 | 9   |
| 7  | R11E3.8                             | DVHNAVLTVLDK         | 49 | 3624   | 1.60 | 0.14 | 9   |
| 7  | R11E3.8                             | DVHNAVLTVLDK         | 48 | 3341   | 1.61 | 0.12 | 7   |
| 7  | R11E3.8                             | RIIVPIVK             | 44 | 7259   | 1.87 | 0.09 | 5   |
| 7  | R11E3.8                             | DVHNAVLTVLDK         | 42 | 5115   | 1.87 | 0.14 | 8   |
| 7  | R11E3.8                             | RIIVPIVK             | 40 | 5701   | 1.96 | 0.08 | 4   |
| 7  | R11E3.8                             | RIIVPIVK             | 52 | 6259   | 2.03 | 0.16 | 8   |
| 7  | R11E3.8                             | DVHNAVLTVLDK         | 38 | 4590   | 2.14 | 0.14 | 7   |
| 7  | R11E3.8                             | RIIVPIVK             | 28 | 4282   | 2.48 | 0.17 | 7   |
| 7  | R11H6.1                             | LPPVLLGTLGSDK        | 56 | 2290   | 0.09 | 0.55 | 611 |
| 10 | R11H6.1                             | NGIDLPVNIK           | 23 | 4246   | 0.27 | 0.75 | 284 |
| 10 | R11H6.1                             | IPGLYEQVAPLSAAEEK    | 33 | 3288   | 0.27 | 0.56 | 207 |
| 7  | R11H6.1                             | LPPVLLGTLGSDK        | 66 | 1810   | 0.29 | 0.43 | 152 |
| 10 | R11H6.1                             | TYDDIEFDVAEFRDSVGASK | 41 | 1753   | 0.29 | 0.07 | 24  |
| 10 | R11H6.1                             | LPPVLLGTLGSDK        | 36 | 630    | 0.31 | 0.31 | 99  |
| 10 | R11H6.1                             | TYDDIEFDVAEFRDSVGASK | 28 | 891    | 0.34 | 0.33 | 96  |
| 7  | R11H6.1                             | IPGLYEQVAPLSAAEEK    | 15 | 1763   | 0.38 | 0.11 | 29  |
| 7  | R11H6.1                             | SDGWDETFELVEK        | 37 | 1262   | 0.42 | 0.21 | 51  |
| 10 | R11H6.1                             | TYDDIEFDVAEFRDSVGASK | 41 | 3078   | 0.42 | 0.11 | 25  |
| 7  | R11H6.1                             | NNIWNYVEGVK          | 56 | 3030   | 0.48 | 0.05 | 11  |
| 10 | R11H6.1                             | TYDDIEFDVAEFRDSVGASK | 35 | 3263   | 0.49 | 0.21 | 43  |
| 1  | R11H6.1                             | SDGWDETFELVEK        | 10 | 358    | 0.49 | 0.22 | 46  |
| 7  | R11H6.1                             | ELLREAVAIQSVSGDPSK   | 11 | 1462   | 0.49 | 0.21 | 43  |
| 22 | R11H6.1                             | SDGWDETFELVEK        | 32 | 948    | 0.49 | 0.12 | 25  |
| 22 | R11H6.1                             | IPGLYEQVAPLSAAEEK    | 22 | 888    | 0.51 | 0.22 | 43  |
| 10 | R11H6.1                             | IPGLYEQVAPLSAAEEK    | 22 | 3030   | 0.51 | 0.34 | 66  |
| 22 | R11H6.1                             | IPGLYEQVAPLSAAEEK    | 12 | 1146   | 0.52 | 0.13 | 25  |
| 7  | R11H6.1                             | LPPVLLGTLGSDK        | 87 | 6008   | 0.52 | 0.13 | 24  |
| 7  | R11H6.1                             | NNIWNYVEGVK          | 25 | 1792   | 0.53 | 0.10 | 19  |
| 7  | R11H6.1                             | LPPVLLGTLGSDK        | 84 | 5943   | 0.55 | 0.12 | 22  |
| 10 | R11H6.1                             | SDGWDETFELVEK        | 32 | 1575   | 0.57 | 0.19 | 33  |
| 7  | R11H6.1                             | IPGLYEQVAPLSAAEEK    | 51 | 3979   | 0.60 | 0.17 | 29  |
| 22 | R11H6.1                             | SDGWDETFELVEK        | 36 | 1663   | 0.62 | 0.08 | 13  |

|              |                      |     |       |       |      |     |
|--------------|----------------------|-----|-------|-------|------|-----|
| 22 R11H6.1   | LPPVLLGTLGSDK        | 46  | 1993  | 0.62  | 0.32 | 51  |
| 10 R11H6.1   | LPPVLLGTLGSDK        | 73  | 6333  | 0.63  | 0.10 | 16  |
| 10 R11H6.1   | TLLVYGHLDVQPAAK      | 34  | 5733  | 0.65  | 0.17 | 25  |
| 22 R11H6.1   | LPPVLLGTLGSDK        | 95  | 12567 | 0.68  | 0.12 | 18  |
| 22 R11H6.1   | ELLREAVAIQSVSGDPSK   | 17  | 1131  | 0.71  | 0.29 | 41  |
| 7 R11H6.1    | ELLREAVAIQSVSGDPSK   | 13  | 1439  | 0.71  | 0.21 | 29  |
| 10 R11H6.1   | LFGRGSSDDK           | 11  | 5823  | 0.72  | 0.03 | 5   |
| 10 R11H6.1   | SDGWDTEPFELVEK       | 36  | 1436  | 0.72  | 0.12 | 16  |
| 10 R11H6.1   | LPPVLLGTLGSDK        | 77  | 6849  | 0.72  | 0.10 | 14  |
| 1 R11H6.1    | SVLLLPIGAADDMAHSQNEK | 30  | 7651  | 0.73  | 0.13 | 18  |
| 10 R11H6.1   | IPGLYEQVAPLSAAEEK    | 40  | 2937  | 0.74  | 0.17 | 23  |
| 1 R11H6.1    | SVLLLPIGAADDMAHSQNEK | 34  | 5345  | 0.74  | 0.17 | 24  |
| 7 R11H6.1    | NNIWNYVEGVK          | 48  | 1858  | 0.74  | 0.07 | 9   |
| 10 R11H6.1   | TLLVYGHLDVQPAAK      | 35  | 6537  | 0.74  | 0.11 | 15  |
| 7 R11H6.1    | LPPVLLGTLGSDK        | 30  | 2436  | 0.75  | 0.20 | 27  |
| 22 R11H6.1   | LPPVLLGTLGSDK        | 96  | 9155  | 0.76  | 0.13 | 17  |
| 10 R11H6.1   | TLLVYGHLDVQPAAK      | 37  | 5146  | 0.77  | 0.15 | 20  |
| 10 R11H6.1   | SVLLLPIGAADDMAHSQNEK | 12  | 2776  | 0.77  | 0.23 | 29  |
| 10 R11H6.1   | TLLVYGHLDVQPAAK      | 28  | 3689  | 0.78  | 0.18 | 23  |
| 7 R11H6.1    | ELLREAVAIQSVSGDPSK   | 13  | 1528  | 0.80  | 0.16 | 20  |
| 7 R11H6.1    | NNIWNYVEGVK          | 27  | 1659  | 0.80  | 0.10 | 13  |
| 22 R11H6.1   | LPPVLLGTLGSDK        | 33  | 1244  | 0.81  | 0.35 | 44  |
| 1 R11H6.1    | NNIWNYVEGVK          | 58  | 1557  | 0.82  | 0.22 | 27  |
| 7 R11H6.1    | NGIDLPVNIK           | 33  | 4606  | 0.83  | 0.28 | 33  |
| 22 R11H6.1   | SVLLLPIGAADDMAHSQNEK | 84  | 4755  | 0.86  | 0.08 | 9   |
| 1 R11H6.1    | LPPVLLGTLGSDK        | 30  | 849   | 0.88  | 0.10 | 11  |
| 22 R11H6.1   | LPPVLLGTLGSDK        | 30  | 1553  | 0.89  | 0.13 | 15  |
| 7 R11H6.1    | IPGLYEQVAPLSAAEEK    | 12  | 1775  | 0.89  | 0.12 | 13  |
| 22 R11H6.1   | SVLLLPIGAADDMAHSQNEK | 127 | 4377  | 0.89  | 0.09 | 10  |
| 1 R11H6.1    | SVLLLPIGAADDMAHSQNEK | 53  | 1299  | 0.91  | 0.15 | 17  |
| 7 R11H6.1    | NGIDLPVNIK           | 12  | 4328  | 0.91  | 0.15 | 17  |
| 1 R11H6.1    | NGIDLPVNIK           | 23  | 1781  | 0.93  | 0.13 | 14  |
| 10 R11H6.1   | LPPVLLGTLGSDK        | 57  | 2651  | 0.94  | 0.14 | 15  |
| 1 R11H6.1    | NGIDLPVNIK           | 50  | 6075  | 0.95  | 0.21 | 22  |
| 7 R11H6.1    | LPPVLLGTLGSDK        | 38  | 2337  | 0.95  | 0.26 | 28  |
| 10 R11H6.1   | LPPVLLGTLGSDK        | 48  | 1876  | 0.97  | 0.21 | 21  |
| 10 R11H6.1   | LPPVLLGTLGSDK        | 44  | 866   | 0.97  | 0.16 | 16  |
| 1 R11H6.1    | SVLLLPIGAADDMAHSQNEK | 58  | 2167  | 0.98  | 0.17 | 18  |
| 1 R11H6.1    | SVLLLPIGAADDMAHSQNEK | 65  | 2248  | 0.98  | 0.12 | 12  |
| 1 R11H6.1    | SVLLLPIGAADDMAHSQNEK | 48  | 2118  | 0.99  | 0.12 | 12  |
| 7 R11H6.1    | ELLREAVAIQSVSGDPSK   | 16  | 7945  | 1.01  | 0.13 | 13  |
| 22 R11H6.1   | NGIDLPVNIK           | 14  | 4082  | 1.05  | 0.23 | 22  |
| 1 R11H6.1    | LPPVLLGTLGSDK        | 12  | 1153  | 1.07  | 0.05 | 5   |
| 1 R11H6.1    | ELLREAVAIQSVSGDPSK   | 11  | 1831  | 1.07  | 0.05 | 5   |
| 22 R11H6.1   | ELLREAVAIQSVSGDPSK   | 11  | 1370  | 1.07  | 0.19 | 18  |
| 1 R11H6.1    | LPPVLLGTLGSDK        | 72  | 8750  | 1.09  | 0.11 | 10  |
| 7 R11H6.1    | IPGLYEQVAPLSAAEEK    | 79  | 7438  | 1.09  | 0.17 | 15  |
| 7 R11H6.1    | IPGLYEQVAPLSAAEEK    | 18  | 1416  | 1.12  | 0.16 | 14  |
| 1 R11H6.1    | LPPVLLGTLGSDK        | 103 | 7407  | 1.12  | 0.14 | 13  |
| 1 R11H6.1    | LPPVLLGTLGSDK        | 12  | 1163  | 1.13  | 0.21 | 18  |
| 7 R11H6.1    | LPPVLLGTLGSDK        | 26  | 1288  | 1.22  | 0.08 | 6   |
| 22 R11H6.1   | LPPVLLGTLGSDK        | 38  | 1890  | 1.22  | 0.26 | 22  |
| 22 R11H6.1   | SVLLLPIGAADDMAHSQNEK | 64  | 1734  | 1.22  | 0.17 | 14  |
| 7 R11H6.1    | LPPVLLGTLGSDK        | 36  | 1595  | 1.23  | 0.14 | 11  |
| 10 R11H6.1   | ELLREAVAIQSVSGDPSK   | 13  | 2066  | 1.25  | 0.32 | 26  |
| 10 R11H6.1   | NNIWNYVEGVK          | 13  | 1741  | 1.26  | 0.07 | 5   |
| 22 R11H6.1   | SVLLLPIGAADDMAHSQNEK | 101 | 2992  | 1.27  | 0.19 | 15  |
| 10 R11H6.1   | LPPVLLGTLGSDK        | 12  | 1104  | 1.28  | 0.26 | 21  |
| 10 R11H6.1   | SVLLLPIGAADDMAHSQNEK | 70  | 4415  | 1.30  | 0.13 | 10  |
| 10 R11H6.1   | NNIWNYVEGVK          | 14  | 1449  | 1.31  | 0.13 | 10  |
| 7 R11H6.1    | IPGLYEQVAPLSAAEEK    | 70  | 5886  | 1.36  | 0.11 | 8   |
| 7 R11H6.1    | LPPVLLGTLGSDK        | 60  | 3107  | 1.37  | 0.23 | 17  |
| 1 R11H6.1    | SVLLLPIGAADDMAHSQNEK | 63  | 1770  | 1.38  | 0.11 | 8   |
| 10 R11H6.1   | NGIDLPVNIK           | 36  | 8084  | 1.41  | 0.12 | 8   |
| 10 R11H6.1   | SVLLLPIGAADDMAHSQNEK | 86  | 3952  | 1.42  | 0.09 | 6   |
| 22 R11H6.1   | LPPVLLGTLGSDK        | 34  | 1176  | 1.44  | 0.43 | 30  |
| 22 R11H6.1   | NNIWNYVEGVK          | 32  | 1909  | 1.48  | 0.12 | 8   |
| 1 R11H6.1    | NNIWNYVEGVK          | 22  | 1230  | 1.49  | 0.17 | 11  |
| 10 R11H6.1   | LPPVLLGTLGSDK        | 22  | 1545  | 1.54  | 0.21 | 14  |
| 1 R11H6.1    | SVLLLPIGAADDMAHSQNEK | 12  | 2263  | 1.57  | 0.06 | 4   |
| 22 R11H6.1   | NNIWNYVEGVK          | 30  | 2154  | 1.57  | 0.07 | 5   |
| 10 R11H6.1   | NGIDLPVNIK           | 32  | 4438  | 1.58  | 0.22 | 14  |
| 1 R11H6.1    | SVLLLPIGAADDMAHSQNEK | 14  | 2547  | 1.61  | 0.10 | 6   |
| 7 R11H6.1    | LPPVLLGTLGSDK        | 48  | 2391  | 1.72  | 0.07 | 4   |
| 1 R11H6.1    | SVLLLPIGAADDMAHSQNEK | 28  | 4115  | 1.72  | 0.12 | 7   |
| 1 R11H6.1    | LPPVLLGTLGSDK        | 14  | 1284  | 1.81  | 0.13 | 7   |
| 22 R11H6.1   | IPGLYEQVAPLSAAEEK    | 34  | 2425  | 1.94  | 0.17 | 9   |
| 1 R11H6.1    | LPPVLLGTLGSDK        | 28  | 1407  | 2.16  | 0.34 | 16  |
| 10 R11H6.1   | IPGLYEQVAPLSAAEEK    | 18  | 3274  | 2.17  | 0.14 | 7   |
| 1 R11H6.1    | LPPVLLGTLGSDK        | 19  | 1079  | 2.26  | 0.08 | 4   |
| 10 R11H6.1   | LPPVLLGTLGSDK        | 35  | 2410  | 2.29  | 0.17 | 8   |
| 1 R11H6.1    | SVLLLPIGAADDMAHSQNEK | 17  | 3408  | 2.32  | 0.09 | 4   |
| 22 R11H6.1   | LPPVLLGTLGSDK        | 27  | 2305  | 2.72  | 0.08 | 3   |
| 10 R11H6.1   | IPGLYEQVAPLSAAEEK    | 18  | 2405  | 3.22  | 0.18 | 6   |
| 10 R11H6.1   | LPPVLLGTLGSDK        | 13  | 1348  | 3.90  | 0.20 | 5   |
| 7 R11H6.1    | LPPVLLGTLGSDK        | 74  | 2906  | 4.01  | 0.56 | 14  |
| 7 R11H6.1    | LPPVLLGTLGSDK        | 57  | 2092  | 4.98  | 0.67 | 14  |
| 7 R11H6.1    | TLLVYGHLDVQPAAK      | 47  | 1598  | 5.42  | 0.22 | 4   |
| 7 R11H6.1    | NGIDLPVNIK           | 31  | 2414  | 18.19 | 0.60 | 3   |
| 22 R12C12.1a | MAPHTLEK             | 15  | 2274  | 0.05  | 0.48 | 893 |
| 22 R12C12.1a | HLNPLK               | 14  | 2739  | 0.07  | 0.34 | 464 |
| 22 R12C12.1a | HLAPFLPGHSVVPVDGRK   | 21  | 4204  | 0.14  | 0.59 | 421 |
| 10 R12C12.1a | HLAPFLPGHSVVPVDGRK   | 28  | 3539  | 0.26  | 0.17 | 65  |
| 1 R12C12.1a  | HLAPFLPGHSVVPVDGRK   | 17  | 1264  | 0.33  | 0.15 | 47  |
| 1 R12C12.1a  | DLDDLTGTNPVPMIK      | 15  | 667   | 0.34  | 0.14 | 40  |
| 22 R12C12.1a | HLAPFLPGHSVVPVDGRK   | 14  | 2932  | 0.39  | 0.65 | 164 |
| 10 R12C12.1a | DLDDLTGTNPVPMIK      | 15  | 1175  | 0.40  | 0.09 | 22  |
| 10 R12C12.1a | HLAPFLPGHSVVPVDGRK   | 14  | 3059  | 0.45  | 0.19 | 43  |
| 10 R12C12.1a | ELEAIAAQNK           | 29  | 3279  | 0.50  | 0.07 | 14  |
| 22 R12C12.1a | HLAPFLPGHSVVPVDGRK   | 15  | 1674  | 0.51  | 0.36 | 70  |
| 10 R12C12.1a | ELEAIAAQNK           | 23  | 4220  | 0.52  | 0.06 | 11  |

|                       |                             |    |       |       |      |     |
|-----------------------|-----------------------------|----|-------|-------|------|-----|
| 10 R12C12.1a          | ALELPAPLDEYK                | 31 | 1855  | 0.53  | 0.16 | 31  |
| 1 R12C12.1a           | HLNPLK                      | 12 | 1695  | 0.53  | 0.11 | 21  |
| 10 R12C12.1a          | ALELPAPLDEYK                | 33 | 1936  | 0.57  | 0.11 | 19  |
| 10 R12C12.1a          | DLDDLTGTNVPNMIK             | 36 | 1207  | 0.58  | 0.22 | 39  |
| 1 R12C12.1a           | HLNPLK                      | 13 | 1428  | 0.59  | 0.12 | 21  |
| 10 R12C12.1a          | VVVVSDHHGNINYP              | 10 | 9327  | 0.74  | 0.21 | 29  |
| 10 R12C12.1a          | ALELPAPLDEYK                | 10 | 1947  | 0.74  | 0.08 | 11  |
| 1 R12C12.1a           | DLDDLTGTNVPNMIK             | 20 | 794   | 0.83  | 0.23 | 28  |
| 10 R12C12.1a          | GYSRIFGDLEK                 | 13 | 1806  | 0.88  | 0.14 | 16  |
| 22 R12C12.1a          | ALELPAPLDEYK                | 11 | 2126  | 0.90  | 0.11 | 13  |
| 22 R12C12.1a          | HLAPFLPGHSVVPVDGRK          | 31 | 2912  | 1.06  | 0.30 | 29  |
| 22 R12C12.1a          | VVVVSDHHGNINYP              | 13 | 6555  | 1.07  | 0.21 | 19  |
| 1 R12C12.1a           | DLDDLTGTNVPNMIK             | 14 | 742   | 1.15  | 0.12 | 10  |
| 10 R12C12.1a          | HLNPLK                      | 11 | 7578  | 1.22  | 0.04 | 4   |
| 1 R12C12.1a           | HGIEVVDIK                   | 45 | 2045  | 1.35  | 0.13 | 10  |
| 10 R12C12.1a          | HGIEVVDIK                   | 37 | 5108  | 1.40  | 0.13 | 9   |
| 10 R12C12.1a          | VVVVSDHHGNINYP              | 14 | 9158  | 1.65  | 0.09 | 6   |
| 1 R12C12.1a           | HLAPFLPGHSVVPVDGRK          | 21 | 1583  | 1.74  | 0.31 | 18  |
| 10 R12C12.1a          | HLNPLK                      | 10 | 6948  | 1.75  | 0.19 | 11  |
| 10 R12C12.1a          | HLNPLK                      | 24 | 6632  | 2.77  | 0.23 | 8   |
| 10 R12C12.1a          | HLNPLK                      | 26 | 4444  | 3.59  | 0.08 | 2   |
| 22 R12C12.1a          | HLAPFLPGHSVVPVDGRK          | 29 | 11241 | 3.86  | 0.69 | 18  |
| 22 R12C12.1a          | ALELPAPLDEYK                | 20 | 1396  | 10.20 | 0.51 | 5   |
| 22 R12C12.1a          | HLNPLK                      | 15 | 3990  | 12.69 | 0.79 | 6   |
| 7 R12C12.1a;R12C12.1b | HGIEVVDIK                   | 25 | 2648  | 0.25  | 0.27 | 107 |
| 7 R12C12.1a;R12C12.1b | HGIEVVDIK                   | 31 | 1690  | 0.25  | 0.31 | 122 |
| 7 R12C12.1a;R12C12.1b | HLNPLK                      | 14 | 1432  | 1.89  | 0.25 | 13  |
| 22 R12E2.3            | NDIAINEQLK                  | 25 | 8161  | 0.74  | 0.13 | 17  |
| 22 R12E2.3            | NDIAINEQLK                  | 27 | 10233 | 0.79  | 0.11 | 14  |
| 22 R12E2.3            | NDIAINEQLK                  | 19 | 7756  | 0.85  | 0.07 | 8   |
| 22 R12E2.3            | IVGWYHTGPK                  | 16 | 613   | 0.87  | 0.16 | 19  |
| 22 R12E2.3            | RVVGVLLGSMK                 | 55 | 1509  | 0.88  | 0.08 | 9   |
| 22 R12E2.3            | RVVGVLLGSMK                 | 28 | 1473  | 0.97  | 0.23 | 23  |
| 22 R12E2.3            | IVGWYHTGPK                  | 14 | 956   | 0.99  | 0.18 | 18  |
| 10 R12E2.3            | RVVGVLLGSMK                 | 26 | 1170  | 1.01  | 0.25 | 25  |
| 10 R12E2.3            | RVVGVLLGSMK                 | 19 | 1253  | 1.43  | 0.29 | 20  |
| 10 R12E2.3            | IVGWYHTGPK                  | 22 | 5867  | 1.69  | 0.12 | 7   |
| 10 R12E2.3            | IVGWYHTGPK                  | 30 | 8677  | 1.74  | 0.17 | 10  |
| 22 R13A5.8            | LIESNDTVVFPEGVFTTVK         | 37 | 3372  | 0.51  | 0.14 | 27  |
| 22 R13A5.8            | IVRRVPLPEGVIATISTAQK        | 25 | 20096 | 0.52  | 0.05 | 10  |
| 22 R13A5.8            | LIESNDTVVFPEGVFTTVK         | 32 | 2751  | 0.55  | 0.14 | 26  |
| 7 R13A5.8             | FLDGIYVSEK                  | 30 | 1167  | 0.57  | 0.09 | 15  |
| 7 R13A5.8             | FLDGIYVSEK                  | 70 | 5229  | 0.57  | 0.09 | 16  |
| 22 R13A5.8            | DEIVVEGNDVQFVSQAAARIQQSTAVK | 41 | 4365  | 0.57  | 0.13 | 23  |
| 1 R13A5.8             | FLDGIYVSEK                  | 79 | 10935 | 0.60  | 0.06 | 10  |
| 1 R13A5.8             | FLDGIYVSEK                  | 31 | 603   | 0.61  | 0.18 | 30  |
| 22 R13A5.8            | IVRRVPLPEGVIATISTAQK        | 21 | 10187 | 0.61  | 0.17 | 28  |
| 1 R13A5.8             | FLDGIYVSEK                  | 15 | 355   | 0.63  | 0.16 | 26  |
| 7 R13A5.8             | FLDGIYVSEK                  | 72 | 7619  | 0.64  | 0.09 | 13  |
| 1 R13A5.8             | FLDGIYVSEK                  | 77 | 11878 | 0.67  | 0.08 | 12  |
| 22 R13A5.8            | LIESNDTVVFPEGVFTTVK         | 46 | 3209  | 0.70  | 0.14 | 21  |
| 7 R13A5.8             | FLDGIYVSEK                  | 36 | 1947  | 0.73  | 0.15 | 21  |
| 22 R13A5.8            | FLDGIYVSEK                  | 34 | 889   | 0.75  | 0.23 | 30  |
| 22 R13A5.8            | DEIVVEGNDVQFVSQAAARIQQSTAVK | 55 | 8961  | 0.77  | 0.11 | 14  |
| 22 R13A5.8            | FLDGIYVSEK                  | 87 | 67398 | 0.79  | 0.09 | 12  |
| 22 R13A5.8            | IVRRVPLPEGVIATISTAQK        | 32 | 5482  | 0.79  | 0.22 | 28  |
| 1 R13A5.8             | FLDGIYVSEK                  | 29 | 542   | 0.80  | 0.22 | 27  |
| 22 R13A5.8            | IVRRVPLPEGVIATISTAQK        | 44 | 28275 | 0.81  | 0.30 | 37  |
| 22 R13A5.8            | FLDGIYVSEK                  | 78 | 64687 | 0.82  | 0.07 | 8   |
| 22 R13A5.8            | WFGVRK                      | 19 | 12050 | 0.82  | 0.12 | 14  |
| 10 R13A5.8            | FLDGIYVSEK                  | 71 | 53888 | 0.83  | 0.07 | 9   |
| 10 R13A5.8            | IVRRVPLPEGVIATISTAQK        | 46 | 10762 | 0.86  | 0.32 | 38  |
| 10 R13A5.8            | WFGVRK                      | 21 | 11156 | 0.87  | 0.14 | 16  |
| 1 R13A5.8             | FLDGIYVSEK                  | 20 | 358   | 0.88  | 0.25 | 28  |
| 10 R13A5.8            | GVTVGFRYP                   | 36 | 29764 | 0.88  | 0.15 | 17  |
| 7 R13A5.8             | FLDGIYVSEK                  | 58 | 1760  | 0.89  | 0.13 | 15  |
| 1 R13A5.8             | FLDGIYVSEK                  | 27 | 417   | 0.89  | 0.17 | 19  |
| 22 R13A5.8            | DEIVVEGNDVQFVSQAAARIQQSTAVK | 68 | 7804  | 0.89  | 0.20 | 22  |
| 22 R13A5.8            | WFGVRK                      | 18 | 11320 | 0.89  | 0.06 | 7   |
| 1 R13A5.8             | FLDGIYVSEK                  | 21 | 518   | 0.90  | 0.23 | 25  |
| 22 R13A5.8            | DEIVVEGNDVQFVSQAAARIQQSTAVK | 55 | 7631  | 0.90  | 0.18 | 20  |
| 10 R13A5.8            | IVRRVPLPEGVIATISTAQK        | 40 | 8526  | 0.90  | 0.09 | 10  |
| 22 R13A5.8            | IVRRVPLPEGVIATISTAQK        | 15 | 5023  | 0.93  | 0.34 | 37  |
| 22 R13A5.8            | LIESNDTVVFPEGVFTTVK         | 29 | 3169  | 0.93  | 0.13 | 14  |
| 10 R13A5.8            | FLDGIYVSEK                  | 35 | 1563  | 0.94  | 0.13 | 14  |
| 10 R13A5.8            | IVRRVPLPEGVIATISTAQK        | 11 | 5761  | 0.95  | 0.60 | 64  |
| 22 R13A5.8            | GVTVGFRYP                   | 13 | 3073  | 1.01  | 0.26 | 26  |
| 22 R13A5.8            | GVTVGFRYP                   | 26 | 19111 | 1.05  | 0.08 | 7   |
| 10 R13A5.8            | FLDGIYVSEK                  | 79 | 49138 | 1.08  | 0.10 | 9   |
| 22 R13A5.8            | GVTVGFRYP                   | 26 | 17752 | 1.15  | 0.10 | 9   |
| 10 R13A5.8            | FLDGIYVSEK                  | 31 | 957   | 1.30  | 0.12 | 10  |
| 1 R13A5.8             | FLDGIYVSEK                  | 21 | 494   | 1.33  | 0.16 | 12  |
| 7 R13A5.8             | FLDGIYVSEK                  | 65 | 3559  | 1.34  | 0.20 | 15  |
| 7 R13A5.8             | FLDGIYVSEK                  | 59 | 2898  | 1.36  | 0.07 | 5   |
| 1 R13A5.8             | FLDGIYVSEK                  | 42 | 574   | 1.47  | 0.12 | 8   |
| 10 R13A5.8            | GVTVGFRYP                   | 23 | 5443  | 1.61  | 0.21 | 13  |
| 1 R13A5.8             | GVTVGFRYP                   | 14 | 3529  | 1.65  | 0.16 | 10  |
| 22 R13A5.8            | FLDGIYVSEK                  | 17 | 1321  | 1.75  | 0.11 | 6   |
| 10 R13A5.8            | FLDGIYVSEK                  | 82 | 3230  | 1.78  | 0.08 | 4   |
| 22 R13A5.8            | GVTVGFRYP                   | 31 | 7580  | 1.89  | 0.08 | 4   |
| 1 R13A5.8             | WFGVRK                      | 16 | 20419 | 2.48  | 0.10 | 4   |
| 1 R13A5.8             | WFGVRK                      | 16 | 14067 | 2.55  | 0.06 | 2   |
| 22 R13F6.10           | ENIELAHNFVK                 | 33 | 1336  | 0.23  | 0.15 | 65  |
| 10 R13F6.10           | ENIELAHNFVK                 | 53 | 2103  | 0.69  | 0.09 | 13  |
| 10 R13F6.10           | ENIELAHNFVK                 | 48 | 2201  | 0.90  | 0.10 | 12  |
| 22 R13F6.10           | ENIELAHNFVK                 | 34 | 1719  | 0.91  | 0.45 | 49  |
| 10 R151.2a;R151.2c    | MTLVGSVEGK                  | 22 | 1408  | 0.30  | 0.29 | 97  |
| 10 R151.2a;R151.2c    | MTLVGSVEGK                  | 32 | 2094  | 0.34  | 0.13 | 39  |
| 10 R151.3             | TLTPGTVLIVLAGRHK            | 23 | 15147 | 0.25  | 0.30 | 119 |
| 1 R151.3              | TVDAPILAAIK                 | 73 | 3900  | 0.35  | 0.11 | 31  |
| 1 R151.3              | TVDAPILAAIK                 | 95 | 4678  | 0.37  | 0.11 | 31  |

|           |                  |    |       |      |      |    |
|-----------|------------------|----|-------|------|------|----|
| 10 R151.3 | RVVFLK           | 22 | 15394 | 0.38 | 0.10 | 26 |
| 1 R151.3  | IPEHINDEYFK      | 31 | 2107  | 0.40 | 0.11 | 29 |
| 1 R151.3  | FALGHSK          | 35 | 23210 | 0.47 | 0.16 | 35 |
| 22 R151.3 | TLTPGTVLIVLAGRHK | 14 | 10331 | 0.52 | 0.16 | 31 |
| 22 R151.3 | TLTPGTVLIVLAGRHK | 11 | 7134  | 0.52 | 0.16 | 31 |
| 1 R151.3  | QLPQSGLLLVGTGPHK | 78 | 6087  | 0.53 | 0.12 | 23 |
| 10 R151.3 | RVVFLK           | 24 | 12908 | 0.54 | 0.12 | 22 |
| 10 R151.3 | TVDAPILAAIK      | 93 | 32480 | 0.58 | 0.16 | 27 |
| 10 R151.3 | FALGHSK          | 48 | 90534 | 0.60 | 0.11 | 18 |
| 1 R151.3  | TVDAPILAAIK      | 49 | 899   | 0.60 | 0.09 | 15 |
| 7 R151.3  | FALGHSK          | 25 | 8807  | 0.61 | 0.23 | 38 |
| 1 R151.3  | TVDAPILAAIK      | 44 | 1565  | 0.61 | 0.11 | 19 |
| 1 R151.3  | QLPQSGLLLVGTGPHK | 74 | 2019  | 0.63 | 0.06 | 9  |
| 1 R151.3  | TVDAPILAAIK      | 39 | 1437  | 0.64 | 0.18 | 28 |
| 1 R151.3  | TVDAPILAAIK      | 66 | 3172  | 0.65 | 0.12 | 18 |
| 10 R151.3 | TVDAPILAAIK      | 97 | 36881 | 0.66 | 0.11 | 16 |
| 10 R151.3 | FALGHSK          | 26 | 20823 | 0.67 | 0.23 | 35 |
| 1 R151.3  | QLPQSGLLLVGTGPHK | 73 | 5232  | 0.71 | 0.06 | 8  |
| 1 R151.3  | TVDAPILAAIK      | 62 | 2557  | 0.71 | 0.10 | 15 |
| 7 R151.3  | TVDAPILAAIK      | 73 | 6167  | 0.72 | 0.11 | 15 |
| 22 R151.3 | FALGHSK          | 28 | 18943 | 0.72 | 0.12 | 17 |
| 7 R151.3  | FALGHSK          | 25 | 38425 | 0.72 | 0.10 | 14 |
| 10 R151.3 | FALGHSK          | 34 | 86078 | 0.74 | 0.09 | 12 |
| 1 R151.3  | QLPQSGLLLVGTGPHK | 68 | 1800  | 0.75 | 0.20 | 26 |
| 10 R151.3 | TVDAPILAAIK      | 75 | 8879  | 0.77 | 0.11 | 14 |
| 10 R151.3 | QLPQSGLLLVGTGPHK | 99 | 19130 | 0.78 | 0.10 | 13 |
| 10 R151.3 | TVDAPILAAIK      | 22 | 1310  | 0.78 | 0.16 | 21 |
| 10 R151.3 | TVDAPILAAIK      | 82 | 7069  | 0.78 | 0.10 | 13 |
| 7 R151.3  | TVDAPILAAIK      | 76 | 8193  | 0.78 | 0.07 | 9  |
| 7 R151.3  | FALGHSK          | 26 | 17980 | 0.81 | 0.08 | 10 |
| 22 R151.3 | FALGHSK          | 46 | 32974 | 0.83 | 0.23 | 27 |
| 1 R151.3  | TVDAPILAAIK      | 16 | 618   | 0.84 | 0.13 | 15 |
| 22 R151.3 | FALGHSK          | 42 | 93291 | 0.84 | 0.10 | 11 |
| 1 R151.3  | NIFASGK          | 30 | 1780  | 0.86 | 0.16 | 18 |
| 1 R151.3  | RVVFLK           | 12 | 6660  | 0.87 | 0.04 | 4  |
| 1 R151.3  | IPEHINDEYFK      | 16 | 11042 | 0.91 | 0.10 | 11 |
| 10 R151.3 | QLPQSGLLLVGTGPHK | 98 | 23707 | 0.92 | 0.09 | 10 |
| 1 R151.3  | IPEHINDEYFK      | 19 | 6779  | 0.93 | 0.15 | 17 |
| 7 R151.3  | NIFASGK          | 17 | 2526  | 0.93 | 0.09 | 10 |
| 1 R151.3  | FALGHSK          | 36 | 13473 | 0.93 | 0.12 | 13 |
| 10 R151.3 | NIFASGK          | 42 | 3043  | 0.94 | 0.26 | 28 |
| 22 R151.3 | TVDAPILAAIK      | 80 | 26952 | 0.94 | 0.10 | 11 |
| 22 R151.3 | TVDAPILAAIK      | 90 | 21578 | 0.94 | 0.10 | 11 |
| 22 R151.3 | RVVFLK           | 23 | 27149 | 0.95 | 0.10 | 11 |
| 22 R151.3 | QLPQSGLLLVGTGPHK | 91 | 10643 | 0.96 | 0.07 | 7  |
| 22 R151.3 | QLPQSGLLLVGTGPHK | 77 | 8004  | 0.96 | 0.15 | 16 |
| 1 R151.3  | TVDAPILAAIK      | 38 | 1027  | 0.97 | 0.19 | 20 |
| 1 R151.3  | TVDAPILAAIK      | 37 | 1429  | 1.01 | 0.11 | 11 |
| 10 R151.3 | VNVSGVK          | 16 | 2716  | 1.01 | 0.19 | 19 |
| 22 R151.3 | IPEHINDEYFK      | 24 | 31751 | 1.03 | 0.15 | 14 |
| 22 R151.3 | RVVFLK           | 19 | 15653 | 1.07 | 0.03 | 3  |
| 7 R151.3  | QLPQSGLLLVGTGPHK | 88 | 8754  | 1.07 | 0.08 | 7  |
| 22 R151.3 | FALGHSK          | 19 | 4823  | 1.08 | 0.12 | 11 |
| 7 R151.3  | NIFASGK          | 18 | 2160  | 1.11 | 0.17 | 15 |
| 22 R151.3 | NIFASGK          | 53 | 4623  | 1.11 | 0.10 | 9  |
| 7 R151.3  | QLPQSGLLLVGTGPHK | 95 | 9629  | 1.12 | 0.09 | 8  |
| 1 R151.3  | IPEHINDEYFK      | 15 | 4733  | 1.22 | 0.11 | 9  |
| 10 R151.3 | FALGHSK          | 35 | 33031 | 1.24 | 0.09 | 8  |
| 10 R151.3 | NIFASGK          | 30 | 3123  | 1.24 | 0.20 | 16 |
| 7 R151.3  | TVDAPILAAIK      | 38 | 2288  | 1.24 | 0.11 | 8  |
| 7 R151.3  | NIFASGK          | 31 | 3932  | 1.25 | 0.12 | 10 |
| 1 R151.3  | FALGHSK          | 19 | 8406  | 1.26 | 0.12 | 9  |
| 22 R151.3 | TVDAPILAAIK      | 76 | 23232 | 1.30 | 0.11 | 8  |
| 10 R151.3 | RVVFLK           | 25 | 7362  | 1.31 | 0.05 | 4  |
| 22 R151.3 | RVVFLK           | 29 | 10133 | 1.32 | 0.11 | 8  |
| 7 R151.3  | TVDAPILAAIK      | 35 | 2330  | 1.34 | 0.13 | 10 |
| 7 R151.3  | TVDAPILAAIK      | 21 | 1243  | 1.34 | 0.18 | 13 |
| 22 R151.3 | TVDAPILAAIK      | 78 | 22324 | 1.38 | 0.08 | 6  |
| 22 R151.3 | FALGHSK          | 41 | 24327 | 1.40 | 0.14 | 10 |
| 7 R151.3  | TVDAPILAAIK      | 28 | 1310  | 1.43 | 0.17 | 12 |
| 10 R151.3 | TVDAPILAAIK      | 50 | 3078  | 1.45 | 0.09 | 6  |
| 10 R151.3 | RVVFLK           | 19 | 16346 | 1.45 | 0.10 | 7  |
| 10 R151.3 | TVDAPILAAIK      | 48 | 2766  | 1.45 | 0.10 | 7  |
| 10 R151.3 | FALGHSK          | 36 | 38086 | 1.47 | 0.11 | 8  |
| 7 R151.3  | IPEHINDEYFK      | 12 | 6697  | 1.50 | 0.13 | 9  |
| 1 R151.3  | IPEHINDEYFK      | 17 | 1950  | 1.51 | 0.12 | 8  |
| 1 R151.3  | RVVFLK           | 19 | 5126  | 1.52 | 0.09 | 6  |
| 22 R151.3 | RVVFLK           | 12 | 7677  | 1.52 | 0.06 | 4  |
| 10 R151.3 | IPEHINDEYFK      | 23 | 26676 | 1.62 | 0.14 | 9  |
| 10 R151.3 | IPEHINDEYFK      | 31 | 11024 | 1.69 | 0.18 | 10 |
| 22 R151.3 | QLPQSGLLLVGTGPHK | 98 | 25064 | 1.72 | 0.08 | 5  |
| 10 R151.3 | QLPQSGLLLVGTGPHK | 60 | 3755  | 1.73 | 0.10 | 6  |
| 10 R151.3 | RVVFLK           | 12 | 11366 | 1.74 | 0.18 | 10 |
| 22 R151.3 | TVDAPILAAIK      | 18 | 1292  | 1.80 | 0.14 | 8  |
| 7 R151.3  | RVVFLK           | 11 | 3193  | 1.83 | 0.05 | 3  |
| 10 R151.3 | QLPQSGLLLVGTGPHK | 99 | 7795  | 1.86 | 0.11 | 6  |
| 10 R151.3 | NIFASGK          | 43 | 6162  | 1.86 | 0.15 | 8  |
| 7 R151.3  | IPEHINDEYFK      | 31 | 11279 | 1.87 | 0.17 | 9  |
| 10 R151.3 | NIFASGK          | 28 | 3666  | 1.91 | 0.15 | 8  |
| 22 R151.3 | TVDAPILAAIK      | 54 | 2923  | 1.92 | 0.10 | 5  |
| 7 R151.3  | RVVFLK           | 12 | 5109  | 1.92 | 0.05 | 3  |
| 22 R151.3 | NIFASGK          | 41 | 6044  | 1.93 | 0.11 | 6  |
| 22 R151.3 | TVDAPILAAIK      | 31 | 2201  | 1.96 | 0.15 | 8  |
| 7 R151.3  | NIFASGK          | 12 | 2324  | 2.00 | 0.21 | 11 |
| 22 R151.3 | QLPQSGLLLVGTGPHK | 82 | 4268  | 2.03 | 0.16 | 8  |
| 7 R151.3  | FALGHSK          | 16 | 8426  | 2.04 | 0.13 | 6  |
| 22 R151.3 | QLPQSGLLLVGTGPHK | 95 | 18685 | 2.07 | 0.12 | 6  |
| 7 R151.3  | TVDAPILAAIK      | 43 | 1474  | 2.11 | 0.09 | 4  |
| 7 R151.3  | TVDAPILAAIK      | 38 | 1333  | 2.12 | 0.15 | 7  |
| 10 R151.3 | NIFASGK          | 37 | 3980  | 2.13 | 0.16 | 8  |
| 22 R151.3 | QLPQSGLLLVGTGPHK | 73 | 6450  | 2.19 | 0.07 | 3  |

|                  |                         |    |       |      |      |     |
|------------------|-------------------------|----|-------|------|------|-----|
| 10 R151.3        | IPEHINDEYFK             | 45 | 13030 | 2.23 | 0.14 | 6   |
| 7 R151.3         | IPEHINDEYFK             | 13 | 3260  | 2.24 | 0.12 | 5   |
| 7 R151.3         | FALGHSK                 | 19 | 7580  | 2.25 | 0.12 | 5   |
| 10 R151.3        | NIFASGK                 | 24 | 2517  | 2.25 | 0.16 | 7   |
| 22 R151.3        | NIFASGK                 | 47 | 7947  | 2.30 | 0.12 | 5   |
| 22 R151.3        | NIFASGK                 | 31 | 2273  | 2.39 | 0.15 | 6   |
| 22 R151.3        | RVVFLK                  | 20 | 18572 | 2.52 | 0.08 | 3   |
| 22 R151.3        | FALGHSK                 | 19 | 28612 | 2.59 | 0.07 | 3   |
| 22 R151.3        | NIFASGK                 | 30 | 2173  | 2.80 | 0.09 | 3   |
| 22 R151.3        | RVVFLK                  | 12 | 13740 | 2.82 | 0.08 | 3   |
| 7 R151.3         | IPEHINDEYFK             | 19 | 5405  | 2.83 | 0.16 | 6   |
| 22 R151.3        | IPEHINDEYFK             | 12 | 18340 | 3.43 | 0.14 | 4   |
| 22 R151.3        | IPEHINDEYFK             | 23 | 12579 | 3.59 | 0.12 | 3   |
| 22 R151.3        | IPEHINDEYFK             | 22 | 10652 | 3.61 | 0.12 | 3   |
| 22 R151.3        | IPEHINDEYFK             | 24 | 22933 | 3.79 | 0.15 | 4   |
| 22 R151.3        | RVVFLK                  | 33 | 2101  | 3.97 | 0.06 | 1   |
| 10 R151.3        | RVVFLK                  | 13 | 1893  | 3.98 | 0.04 | 1   |
| 10 R151.3        | RVVFLK                  | 21 | 2882  | 4.08 | 0.06 | 1   |
| 22 R151.3        | RVVFLK                  | 14 | 2808  | 4.11 | 0.06 | 1   |
| 10 R31.1a;R31.1b | GEVLALLEK               | 10 | 9211  | 0.46 | 0.50 | 108 |
| 7 R31.1a;R31.1b  | GEVLALLEK               | 22 | 2511  | 0.52 | 0.34 | 65  |
| 7 R31.1a;R31.1b  | GEVLALLEK               | 17 | 4262  | 1.97 | 0.09 | 4   |
| 7 R31.1a;R31.1b  | GEVLALLEK               | 11 | 3609  | 2.32 | 0.18 | 8   |
| 22 R74.1         | VNYVLGLEK               | 16 | 1196  | 0.41 | 0.17 | 41  |
| 22 R74.1         | ILGAPLSAPLAK            | 16 | 906   | 0.41 | 0.08 | 18  |
| 1 R74.1          | AISQLIGK                | 41 | 1435  | 0.41 | 0.08 | 20  |
| 22 R74.1         | VNYVLGLEK               | 29 | 897   | 0.42 | 0.15 | 35  |
| 22 R74.1         | ILGAPLSAPLAK            | 20 | 850   | 0.44 | 0.19 | 44  |
| 1 R74.1          | TILDILEK                | 13 | 385   | 0.46 | 0.21 | 46  |
| 1 R74.1          | AISQLIGK                | 20 | 1185  | 0.52 | 0.11 | 22  |
| 22 R74.1         | EIPEVPTEAVIYVAK         | 21 | 2348  | 0.53 | 0.29 | 55  |
| 10 R74.1         | AISQLIGK                | 13 | 944   | 0.54 | 0.06 | 10  |
| 22 R74.1         | VNYVLGLEK               | 32 | 1395  | 0.54 | 0.20 | 36  |
| 10 R74.1         | TILDILEK                | 18 | 987   | 0.55 | 0.15 | 27  |
| 1 R74.1          | TILDILEK                | 17 | 392   | 0.56 | 0.18 | 31  |
| 22 R74.1         | EIPEVPTEAVIYVAK         | 25 | 2583  | 0.58 | 0.04 | 6   |
| 10 R74.1         | AISQLIGK                | 42 | 2384  | 0.58 | 0.16 | 27  |
| 10 R74.1         | AISQLIGK                | 26 | 1645  | 0.60 | 0.18 | 30  |
| 1 R74.1          | TILDILEK                | 18 | 372   | 0.62 | 0.08 | 13  |
| 22 R74.1         | EIPEVPTEAVIYVAK         | 32 | 2587  | 0.64 | 0.25 | 40  |
| 10 R74.1         | AISQLIGK                | 53 | 1781  | 0.64 | 0.22 | 35  |
| 1 R74.1          | AISQLIGK                | 32 | 1179  | 0.64 | 0.00 | 1   |
| 10 R74.1         | AISQLIGK                | 40 | 1737  | 0.65 | 0.21 | 33  |
| 10 R74.1         | ILGAPLSAPLAK            | 13 | 985   | 0.67 | 0.18 | 27  |
| 10 R74.1         | GFYDGVMLVGK             | 11 | 916   | 0.70 | 0.32 | 47  |
| 22 R74.1         | VAQLQEIEK               | 20 | 2201  | 0.70 | 0.19 | 27  |
| 10 R74.1         | AISQLIGK                | 43 | 2346  | 0.71 | 0.11 | 15  |
| 10 R74.1         | TILDILEK                | 32 | 1000  | 0.72 | 0.06 | 8   |
| 10 R74.1         | EIPEVPTEAVIYVAK         | 13 | 911   | 0.73 | 0.07 | 9   |
| 10 R74.1         | ILGAPLSAPLAK            | 12 | 1575  | 0.74 | 0.18 | 25  |
| 10 R74.1         | AISQLIGK                | 58 | 2971  | 0.76 | 0.12 | 16  |
| 22 R74.1         | GTGVVTSVPSDSPDDFAALSDLK | 35 | 1470  | 0.78 | 0.17 | 21  |
| 10 R74.1         | ILGAPLSAPLAK            | 26 | 1011  | 0.78 | 0.13 | 17  |
| 1 R74.1          | AISQLIGK                | 30 | 1091  | 0.78 | 0.18 | 22  |
| 10 R74.1         | VNYVLGLEK               | 15 | 816   | 0.79 | 0.14 | 18  |
| 10 R74.1         | GFYDGVMLVGK             | 60 | 992   | 0.79 | 0.14 | 18  |
| 1 R74.1          | TILDILEK                | 13 | 420   | 0.79 | 0.19 | 24  |
| 1 R74.1          | TILDILEK                | 22 | 382   | 0.80 | 0.18 | 23  |
| 10 R74.1         | AISQLIGK                | 39 | 1755  | 0.81 | 0.11 | 14  |
| 22 R74.1         | ILGAPLSAPLAK            | 25 | 1117  | 0.82 | 0.09 | 11  |
| 10 R74.1         | ILGAPLSAPLAK            | 30 | 1767  | 0.82 | 0.17 | 21  |
| 1 R74.1          | AISQLIGK                | 40 | 1910  | 0.83 | 0.16 | 19  |
| 22 R74.1         | AISQLIGK                | 12 | 700   | 0.84 | 0.16 | 19  |
| 10 R74.1         | ILGAPLSAPLAK            | 11 | 1072  | 0.84 | 0.11 | 13  |
| 10 R74.1         | AISQLIGK                | 24 | 935   | 0.85 | 0.05 | 6   |
| 10 R74.1         | AISQLIGK                | 45 | 3444  | 0.85 | 0.12 | 14  |
| 22 R74.1         | RYTIYSPK                | 17 | 1464  | 0.87 | 0.13 | 15  |
| 10 R74.1         | AISQLIGK                | 47 | 1737  | 0.88 | 0.10 | 11  |
| 10 R74.1         | GFYDGVMLVGK             | 13 | 490   | 0.88 | 0.09 | 10  |
| 22 R74.1         | VNYVLGLEK               | 15 | 673   | 0.89 | 0.21 | 24  |
| 10 R74.1         | GFYDGVMLVGK             | 43 | 960   | 0.89 | 0.17 | 19  |
| 10 R74.1         | GFYDGVMLVGK             | 43 | 806   | 0.89 | 0.23 | 26  |
| 10 R74.1         | ILGAPLSAPLAK            | 20 | 1535  | 0.91 | 0.16 | 18  |
| 10 R74.1         | GFYDGVMLVGK             | 49 | 797   | 0.91 | 0.14 | 15  |
| 22 R74.1         | GFYDGVMLVGK             | 32 | 705   | 0.91 | 0.28 | 30  |
| 10 R74.1         | GFYDGVMLVGK             | 65 | 1612  | 0.93 | 0.09 | 9   |
| 10 R74.1         | GFYDGVMLVGK             | 32 | 704   | 0.94 | 0.17 | 19  |
| 10 R74.1         | AISQLIGK                | 54 | 1980  | 0.94 | 0.12 | 13  |
| 10 R74.1         | GTGVVTSVPSDSPDDFAALSDLK | 27 | 1246  | 0.95 | 0.13 | 14  |
| 22 R74.1         | ILGAPLSAPLAK            | 13 | 979   | 0.99 | 0.16 | 16  |
| 22 R74.1         | GTGVVTSVPSDSPDDFAALSDLK | 10 | 1054  | 0.99 | 0.11 | 11  |
| 10 R74.1         | GIRANGHLLLNNEK          | 13 | 5820  | 1.01 | 0.11 | 11  |
| 22 R74.1         | RYTIYSPK                | 17 | 1370  | 1.01 | 0.05 | 5   |
| 22 R74.1         | GFYDGVMLVGK             | 49 | 922   | 1.04 | 0.11 | 10  |
| 22 R74.1         | GTGVVTSVPSDSPDDFAALSDLK | 38 | 1656  | 1.05 | 0.17 | 16  |
| 1 R74.1          | TILDILEK                | 16 | 408   | 1.05 | 0.18 | 17  |
| 7 R74.1          | TILDILEK                | 18 | 679   | 1.06 | 0.21 | 20  |
| 22 R74.1         | GFYDGVMLVGK             | 23 | 770   | 1.07 | 0.29 | 27  |
| 10 R74.1         | TILDILEK                | 41 | 1665  | 1.10 | 0.15 | 14  |
| 22 R74.1         | AISQLIGK                | 11 | 1347  | 1.10 | 0.19 | 17  |
| 22 R74.1         | VNYVLGLEK               | 19 | 1254  | 1.10 | 0.15 | 13  |
| 22 R74.1         | GFYDGVMLVGK             | 35 | 845   | 1.10 | 0.27 | 24  |
| 10 R74.1         | GFYDGVMLVGK             | 61 | 1369  | 1.10 | 0.20 | 19  |
| 10 R74.1         | AISQLIGK                | 40 | 2484  | 1.10 | 0.06 | 5   |
| 10 R74.1         | AISQLIGK                | 39 | 1662  | 1.10 | 0.16 | 14  |
| 10 R74.1         | GIRANGHLLLNNEK          | 24 | 7795  | 1.11 | 0.09 | 8   |
| 22 R74.1         | VNYVLGLEK               | 38 | 1178  | 1.13 | 0.19 | 17  |
| 10 R74.1         | GIRANGHLLLNNEK          | 18 | 4779  | 1.14 | 0.15 | 13  |
| 22 R74.1         | ILGAPLSAPLAK            | 15 | 723   | 1.14 | 0.35 | 31  |
| 10 R74.1         | GFYDGVMLVGK             | 72 | 1583  | 1.15 | 0.14 | 12  |
| 10 R74.1         | AISQLIGK                | 31 | 2134  | 1.15 | 0.15 | 13  |

|                      |                         |    |       |      |      |     |
|----------------------|-------------------------|----|-------|------|------|-----|
| 22 R74.1             | GFYDGVMLVGK             | 40 | 769   | 1.17 | 0.14 | 12  |
| 10 R74.1             | GFYDGVMLVGK             | 63 | 1201  | 1.17 | 0.20 | 17  |
| 1 R74.1              | GFYDGVMLVGK             | 32 | 861   | 1.17 | 0.11 | 9   |
| 22 R74.1             | AISQLIGK                | 31 | 1767  | 1.17 | 0.15 | 13  |
| 1 R74.1              | ILGAPLSAPLAK            | 13 | 701   | 1.19 | 0.08 | 7   |
| 10 R74.1             | AISQLIGK                | 54 | 2533  | 1.19 | 0.15 | 13  |
| 10 R74.1             | AISQLIGK                | 63 | 4085  | 1.20 | 0.08 | 7   |
| 10 R74.1             | AISQLIGK                | 51 | 4517  | 1.20 | 0.05 | 4   |
| 10 R74.1             | GIRANGHLLLNNEK          | 22 | 6708  | 1.20 | 0.12 | 10  |
| 1 R74.1              | GIRANGHLLLNNEK          | 12 | 1801  | 1.23 | 0.15 | 12  |
| 10 R74.1             | GFYDGVMLVGK             | 49 | 1327  | 1.24 | 0.17 | 14  |
| 10 R74.1             | AISQLIGK                | 37 | 2723  | 1.26 | 0.14 | 11  |
| 1 R74.1              | TILDILEK                | 17 | 439   | 1.26 | 0.20 | 16  |
| 10 R74.1             | TILDILEK                | 29 | 1648  | 1.27 | 0.11 | 9   |
| 10 R74.1             | GFYDGVMLVGK             | 52 | 716   | 1.27 | 0.13 | 10  |
| 22 R74.1             | AISQLIGK                | 46 | 1568  | 1.28 | 0.12 | 10  |
| 22 R74.1             | GFYDGVMLVGK             | 46 | 1374  | 1.28 | 0.13 | 10  |
| 10 R74.1             | GFYDGVMLVGK             | 59 | 1506  | 1.29 | 0.21 | 17  |
| 10 R74.1             | YQWQIMK                 | 17 | 1641  | 1.33 | 0.10 | 7   |
| 22 R74.1             | GIRANGHLLLNNEK          | 19 | 8150  | 1.35 | 0.04 | 3   |
| 7 R74.1              | ILGAPLSAPLAK            | 17 | 1019  | 1.36 | 0.20 | 15  |
| 10 R74.1             | ILGAPLSAPLAK            | 13 | 1889  | 1.37 | 0.18 | 14  |
| 10 R74.1             | GFYDGVMLVGK             | 51 | 1293  | 1.39 | 0.11 | 8   |
| 10 R74.1             | ILGAPLSAPLAK            | 11 | 930   | 1.40 | 0.06 | 4   |
| 10 R74.1             | RYTIYSPK                | 21 | 1091  | 1.40 | 0.12 | 9   |
| 22 R74.1             | ILGAPLSAPLAK            | 15 | 1208  | 1.41 | 0.07 | 5   |
| 10 R74.1             | GFYDGVMLVGK             | 57 | 1225  | 1.41 | 0.20 | 14  |
| 22 R74.1             | VNYVLGLEK               | 33 | 1372  | 1.42 | 0.11 | 8   |
| 10 R74.1             | AISQLIGK                | 23 | 742   | 1.42 | 0.06 | 5   |
| 22 R74.1             | VNYVLGLEK               | 24 | 1342  | 1.46 | 0.15 | 10  |
| 10 R74.1             | GFYDGVMLVGK             | 48 | 1208  | 1.47 | 0.17 | 12  |
| 22 R74.1             | GIRANGHLLLNNEK          | 14 | 7454  | 1.49 | 0.18 | 12  |
| 10 R74.1             | RYTIYSPK                | 20 | 883   | 1.54 | 0.22 | 14  |
| 22 R74.1             | GFYDGVMLVGK             | 61 | 1729  | 1.57 | 0.12 | 8   |
| 1 R74.1              | GFYDGVMLVGK             | 46 | 739   | 1.58 | 0.20 | 12  |
| 22 R74.1             | ILGAPLSAPLAK            | 19 | 1474  | 1.59 | 0.21 | 13  |
| 7 R74.1              | TILDILEK                | 36 | 871   | 1.62 | 0.20 | 12  |
| 10 R74.1             | AISQLIGK                | 22 | 1024  | 1.67 | 0.10 | 6   |
| 7 R74.1              | ILGAPLSAPLAK            | 12 | 881   | 1.68 | 0.20 | 12  |
| 22 R74.1             | GIRANGHLLLNNEK          | 12 | 9468  | 1.68 | 0.13 | 8   |
| 22 R74.1             | GFYDGVMLVGK             | 44 | 1298  | 1.77 | 0.10 | 6   |
| 22 R74.1             | VAQLQIEK                | 57 | 1727  | 1.84 | 0.14 | 8   |
| 10 R74.1             | VAQLQIEK                | 44 | 1600  | 1.84 | 0.16 | 8   |
| 22 R74.1             | RYTIYSPK                | 20 | 1206  | 1.85 | 0.14 | 8   |
| 10 R74.1             | YQWQIMK                 | 23 | 1219  | 1.98 | 0.15 | 7   |
| 7 R74.1              | RYTIYSPK                | 27 | 644   | 1.98 | 0.21 | 11  |
| 10 R74.1             | VNYVLGLEK               | 14 | 735   | 1.99 | 0.16 | 8   |
| 22 R74.1             | VAQLQIEK                | 56 | 1640  | 2.08 | 0.15 | 7   |
| 10 R74.1             | RYTIYSPK                | 24 | 969   | 2.11 | 0.23 | 11  |
| 10 R74.1             | GTGVVTSVPSDSPDDFAALSDLK | 18 | 1113  | 2.12 | 0.21 | 10  |
| 7 R74.1              | RYTIYSPK                | 14 | 756   | 2.22 | 0.13 | 6   |
| 10 R74.1             | VAQLQIEK                | 38 | 1644  | 2.29 | 0.15 | 7   |
| 10 R74.1             | RYTIYSPK                | 23 | 1312  | 2.51 | 0.06 | 3   |
| 22 R74.1             | RYTIYSPK                | 28 | 1457  | 3.27 | 0.18 | 6   |
| 10 R74.1             | RYTIYSPK                | 16 | 997   | 3.78 | 0.15 | 4   |
| 7 T01C8.5            | AATELVGAESPAIK          | 34 | 2494  | 0.13 | 0.18 | 135 |
| 7 T01C8.5            | AATELVGAESPAIK          | 37 | 2643  | 0.19 | 0.10 | 53  |
| 7 T01C8.5            | AATELVGAESPAIK          | 38 | 2326  | 0.19 | 0.13 | 69  |
| 7 T01C8.5            | AATELVGAESPAIK          | 38 | 1750  | 0.19 | 0.18 | 95  |
| 7 T01C8.5            | AATELVGAESPAIK          | 38 | 3961  | 0.20 | 0.14 | 70  |
| 7 T01C8.5            | AATELVGAESPAIK          | 39 | 3275  | 0.21 | 0.10 | 47  |
| 7 T01C8.5            | AATELVGAESPAIK          | 40 | 3965  | 0.24 | 0.22 | 92  |
| 7 T01C8.5            | AATELVGAESPAIK          | 49 | 4217  | 0.24 | 0.18 | 73  |
| 7 T01C8.5            | TVYVSNPTWGNHK           | 28 | 2047  | 0.29 | 0.13 | 46  |
| 7 T01C8.5            | MYLDETAPVK              | 27 | 1535  | 0.31 | 0.22 | 71  |
| 7 T01C8.5            | MYLDETAPVK              | 18 | 5572  | 0.34 | 0.09 | 28  |
| 7 T01C8.5            | MYLDETAPVK              | 22 | 1566  | 0.37 | 0.19 | 51  |
| 7 T01C8.5            | MYLDETAPVK              | 11 | 1231  | 0.39 | 0.04 | 10  |
| 22 T01C8.5           | AIDETVRAVK              | 22 | 20359 | 0.40 | 0.21 | 52  |
| 7 T01C8.5            | TVYVSNPTWGNHK           | 30 | 1842  | 0.41 | 0.07 | 18  |
| 7 T01C8.5            | MYLDETAPVK              | 18 | 1190  | 0.43 | 0.18 | 43  |
| 22 T01C8.5           | AIDETVRAVK              | 29 | 24981 | 0.44 | 0.21 | 48  |
| 7 T01C8.5            | MYLDETAPVK              | 15 | 1178  | 0.51 | 0.09 | 18  |
| 22 T01C8.5           | FLSDLESAPEK             | 41 | 2415  | 0.62 | 0.39 | 64  |
| 7 T01C8.5            | AIDETVRAVK              | 14 | 4542  | 0.70 | 0.18 | 26  |
| 22 T01C8.5           | LVAEVIK                 | 15 | 680   | 0.73 | 0.29 | 41  |
| 7 T01C8.5            | FLSDLESAPEK             | 28 | 2487  | 0.74 | 0.12 | 16  |
| 7 T01C8.5            | MYLDETAPVK              | 14 | 1122  | 0.77 | 0.34 | 44  |
| 22 T01C8.5           | AIDETVRAVK              | 18 | 8880  | 0.87 | 0.10 | 11  |
| 7 T01C8.5            | AIDETVRAVK              | 18 | 4246  | 0.95 | 0.32 | 34  |
| 22 T01C8.5           | AATELVGAESPAIK          | 38 | 2157  | 1.15 | 0.08 | 7   |
| 22 T01C8.5           | TVYVSNPTWGNHK           | 60 | 9958  | 1.35 | 0.12 | 9   |
| 22 T01C8.5           | TVYVSNPTWGNHK           | 52 | 7626  | 1.35 | 0.11 | 8   |
| 22 T01C8.5           | AATELVGAESPAIK          | 40 | 2966  | 1.36 | 0.12 | 9   |
| 7 T01C8.5            | FLSDLESAPEK             | 34 | 2944  | 1.37 | 0.14 | 10  |
| 22 T01C8.5           | MYLDETAPVK              | 14 | 6221  | 1.46 | 0.10 | 7   |
| 7 T01C8.5            | AIDETVRAVK              | 11 | 5114  | 1.79 | 0.09 | 5   |
| 7 T01C8.5            | AATELVGAESPAIK          | 12 | 2091  | 1.97 | 0.15 | 7   |
| 1 T01C8.5            | AIDETVRAVK              | 14 | 2524  | 3.50 | 0.18 | 5   |
| 10 T01D1.4           | GLSHRFTTTPQNFVK         | 34 | 6935  | 1.11 | 0.10 | 9   |
| 10 T01D1.4           | GLSHRFTTTPQNFVK         | 19 | 2064  | 1.91 | 0.29 | 15  |
| 22 T01D1.4           | GLSHRFTTTPQNFVK         | 21 | 10237 | 2.03 | 0.17 | 8   |
| 22 T01D1.4           | GLSHRFTTTPQNFVK         | 22 | 10788 | 3.57 | 0.13 | 4   |
| 10 T02B5.3           | VQLSTGIEGK              | 19 | 589   | 0.79 | 0.21 | 27  |
| 22 T02G5.7           | ELNIEPSVVNVK            | 12 | 1986  | 0.75 | 0.20 | 27  |
| 1 T02G5.7            | ALVTAAVEIK              | 21 | 817   | 0.80 | 0.17 | 21  |
| 22 T02G5.7           | ELNIEPSVVNVK            | 32 | 2186  | 0.94 | 0.26 | 27  |
| 22 T02G5.7           | AAIERSGVAPEK            | 47 | 8932  | 1.17 | 0.12 | 10  |
| 22 T02G5.7           | AAIERSGVAPEK            | 29 | 8131  | 1.37 | 0.08 | 6   |
| 7 T02G5.8            | FTSLRTVFAQ              | 20 | 1299  | 1.00 | 0.35 | 35  |
| 10 T02G5.9a;T02G5.9b | EQVVEEIVSVAGRIHSK       | 19 | 1991  | 0.39 | 0.02 | 6   |

|                              |                         |     |       |      |      |     |
|------------------------------|-------------------------|-----|-------|------|------|-----|
| 22 T02G5.9a;T02G5.9b         | LGATLPDPSTLHTEEAREVFDK  | 18  | 9064  | 0.43 | 0.04 | 8   |
| 10 T02G5.9a;T02G5.9b         | LGATLPDPSTLHTEEAREVFDK  | 13  | 6018  | 0.46 | 0.14 | 30  |
| 10 T02G5.9a;T02G5.9b         | EQVVEEIVSVAGRIHSK       | 29  | 2593  | 0.50 | 0.12 | 24  |
| 10 T02G5.9a;T02G5.9b         | LGATLPDPSTLHTEEAREVFDK  | 14  | 5633  | 0.51 | 0.16 | 31  |
| 1 T02G5.9a;T02G5.9b          | FHTGDVDFVTLHDRIK        | 17  | 1452  | 0.62 | 0.04 | 7   |
| 10 T02G5.9a;T02G5.9b         | RYLDLILNPRVK            | 50  | 9944  | 0.65 | 0.11 | 17  |
| 10 T02G5.9a;T02G5.9b         | RYLDLILNPRVK            | 24  | 6614  | 0.68 | 0.09 | 13  |
| 1 T02G5.9a;T02G5.9b          | LNVAVADAPK              | 86  | 4923  | 0.72 | 0.08 | 11  |
| 22 T02G5.9a;T02G5.9b         | FHTGDVDFVTLHDRIK        | 15  | 3553  | 0.78 | 0.21 | 26  |
| 10 T02G5.9a;T02G5.9b         | FHTGDVDFVTLHDRIK        | 17  | 8923  | 0.85 | 0.13 | 16  |
| 10 T02G5.9a;T02G5.9b         | LNVAVADAPK              | 84  | 22944 | 0.99 | 0.09 | 9   |
| 22 T02G5.9a;T02G5.9b         | EQVVEEIVSVAGRIHSK       | 20  | 2939  | 1.02 | 0.14 | 13  |
| 22 T02G5.9a;T02G5.9b         | RYLDLILNPRVK            | 46  | 9581  | 1.09 | 0.12 | 11  |
| 22 T02G5.9a;T02G5.9b         | FHTGDVDFVTLHDRIK        | 11  | 5505  | 1.15 | 0.13 | 11  |
| 22 T02G5.9a;T02G5.9b         | RYLDLILNPRVK            | 30  | 6427  | 1.17 | 0.07 | 6   |
| 10 T02G5.9a;T02G5.9b         | LNVAVADAPK              | 78  | 21047 | 1.22 | 0.05 | 4   |
| 22 T02G5.9a;T02G5.9b         | RYLDLILNPRVK            | 45  | 7846  | 1.28 | 0.09 | 7   |
| 22 T02G5.9a;T02G5.9b         | RGDIVGFTGRATRTK         | 18  | 18262 | 1.35 | 0.22 | 16  |
| 22 T02G5.9a;T02G5.9b         | RGDIVGFTGRATRTK         | 17  | 14434 | 1.42 | 0.23 | 16  |
| 22 T02G5.9a;T02G5.9b         | LNVAVADAPK              | 78  | 9271  | 1.97 | 0.08 | 4   |
| 10 T02G5.9a;T02G5.9b         | RVHMYDGLAEK             | 11  | 25174 | 2.67 | 0.12 | 5   |
| 7 T02G5.9a;T02G5.9b;T02G5.9c | LNVAVADAPK              | 43  | 2915  | 1.26 | 0.30 | 24  |
| 7 T02G5.9a;T02G5.9b;T02G5.9c | RVHMYDGLAEK             | 11  | 3574  | 1.85 | 0.10 | 5   |
| 22 T03E6.7                   | GYVDTPEGDEEQLK          | 30  | 1914  | 0.59 | 0.20 | 33  |
| 1 T03E6.7                    | GYVDTPEGDEEQLK          | 55  | 2991  | 0.61 | 0.13 | 22  |
| 1 T03E6.7                    | GYVDTPEGDEEQLK          | 48  | 2131  | 0.71 | 0.10 | 15  |
| 7 T03E6.7                    | LSRQIESAIEK             | 11  | 1633  | 0.78 | 0.09 | 12  |
| 10 T03E6.7                   | LSRQIESAIEK             | 19  | 2914  | 0.82 | 0.11 | 14  |
| 22 T03E6.7                   | GYVDTPEGDEEQLK          | 42  | 2363  | 1.13 | 0.12 | 11  |
| 22 T03E6.7                   | GYVDTPEGDEEQLK          | 34  | 1854  | 1.20 | 0.06 | 5   |
| 10 T03E6.7                   | GYVDTPEGDEEQLK          | 60  | 4421  | 1.31 | 0.14 | 11  |
| 10 T03E6.7                   | GYVDTPEGDEEQLK          | 38  | 1652  | 1.60 | 0.08 | 5   |
| 7 T03F1.3                    | ATAAGAITIIGGGDTATAAK    | 101 | 5269  | 0.10 | 0.19 | 199 |
| 10 T03F1.3                   | SLMDEVVK                | 13  | 2473  | 0.14 | 0.33 | 235 |
| 7 T03F1.3                    | IVNELLEAAK              | 56  | 1706  | 0.19 | 0.09 | 49  |
| 7 T03F1.3                    | VSHVSTGGGASLELLEGK      | 70  | 4694  | 0.19 | 0.30 | 157 |
| 10 T03F1.3                   | NELSYFSK                | 20  | 6366  | 0.21 | 0.18 | 88  |
| 7 T03F1.3                    | ATAAGAITIIGGGDTATAAK    | 125 | 5530  | 0.22 | 0.15 | 70  |
| 1 T03F1.3                    | LAIDQLNLAGK             | 61  | 1513  | 0.23 | 0.11 | 49  |
| 7 T03F1.3                    | IVNELLEAAK              | 51  | 2206  | 0.23 | 0.18 | 78  |
| 7 T03F1.3                    | ATAAGAITIIGGGDTATAAK    | 136 | 4973  | 0.23 | 0.16 | 71  |
| 22 T03F1.3                   | SLMDEVVK                | 20  | 3061  | 0.23 | 0.20 | 85  |
| 7 T03F1.3                    | NELSYFSK                | 41  | 4849  | 0.24 | 0.15 | 62  |
| 7 T03F1.3                    | IFAAAIQRAK              | 57  | 13902 | 0.27 | 0.16 | 60  |
| 1 T03F1.3                    | NELSYFSK                | 19  | 3394  | 0.27 | 0.15 | 54  |
| 22 T03F1.3                   | VSHVSTGGGASLELLEGK      | 79  | 3338  | 0.27 | 0.20 | 72  |
| 7 T03F1.3                    | IFAAAIQRAK              | 62  | 11333 | 0.28 | 0.12 | 44  |
| 22 T03F1.3                   | LAIDQLNLAGK             | 30  | 1263  | 0.28 | 0.20 | 73  |
| 1 T03F1.3                    | LAIDQLNLAGK             | 72  | 2338  | 0.28 | 0.17 | 60  |
| 10 T03F1.3                   | ALDNPARPFLAILGGAK       | 49  | 2088  | 0.29 | 0.08 | 28  |
| 7 T03F1.3                    | IQLIK                   | 14  | 2648  | 0.29 | 0.23 | 79  |
| 1 T03F1.3                    | NELSYFSK                | 43  | 3443  | 0.30 | 0.16 | 52  |
| 10 T03F1.3                   | ALDNPARPFLAILGGAK       | 26  | 1431  | 0.30 | 0.22 | 73  |
| 7 T03F1.3                    | IVNELLEAAK              | 50  | 1940  | 0.31 | 0.16 | 51  |
| 7 T03F1.3                    | GVQIHLPVDFVIADK         | 53  | 5062  | 0.31 | 0.31 | 99  |
| 22 T03F1.3                   | ATAAGAITIIGGGDTATAAK    | 164 | 6443  | 0.32 | 0.21 | 65  |
| 7 T03F1.3                    | GVQIHLPVDFVIADK         | 44  | 3625  | 0.33 | 0.13 | 39  |
| 7 T03F1.3                    | VSHVSTGGGASLELLEGK      | 79  | 6330  | 0.33 | 0.40 | 121 |
| 22 T03F1.3                   | IVNELLEAAK              | 53  | 5879  | 0.33 | 0.16 | 47  |
| 10 T03F1.3                   | YTLKPVAEELK             | 25  | 11717 | 0.34 | 0.22 | 65  |
| 7 T03F1.3                    | NELSYFSK                | 51  | 3217  | 0.34 | 0.30 | 89  |
| 22 T03F1.3                   | IVNELLEAAK              | 53  | 5728  | 0.34 | 0.03 | 10  |
| 7 T03F1.3                    | YTLKPVAEELK             | 29  | 7803  | 0.35 | 0.32 | 91  |
| 10 T03F1.3                   | YTLKPVAEELK             | 23  | 12321 | 0.35 | 0.08 | 24  |
| 10 T03F1.3                   | ALDNPARPFLAILGGAK       | 16  | 2815  | 0.37 | 0.30 | 81  |
| 22 T03F1.3                   | IVNELLEAAK              | 41  | 2992  | 0.38 | 0.15 | 39  |
| 10 T03F1.3                   | ITNNQRIAAAVPTIQHALSNGAK | 48  | 6320  | 0.38 | 0.13 | 35  |
| 1 T03F1.3                    | ITNNQRIAAAVPTIQHALSNGAK | 27  | 3443  | 0.41 | 0.20 | 50  |
| 7 T03F1.3                    | IFAAAIQRAK              | 45  | 3236  | 0.41 | 0.07 | 18  |
| 10 T03F1.3                   | IVNELLEAAK              | 29  | 2785  | 0.41 | 0.14 | 35  |
| 22 T03F1.3                   | LAIDQLNLAGK             | 61  | 1081  | 0.41 | 0.23 | 57  |
| 22 T03F1.3                   | IVNELLEAAK              | 43  | 3060  | 0.41 | 0.09 | 22  |
| 1 T03F1.3                    | ITNNQRIAAAVPTIQHALSNGAK | 33  | 6723  | 0.42 | 0.08 | 19  |
| 10 T03F1.3                   | ALDNPARPFLAILGGAK       | 27  | 2272  | 0.42 | 0.21 | 48  |
| 10 T03F1.3                   | IVNELLEAAK              | 23  | 597   | 0.43 | 0.13 | 30  |
| 22 T03F1.3                   | VSHVSTGGGASLELLEGK      | 21  | 5283  | 0.43 | 0.28 | 65  |
| 10 T03F1.3                   | IVNELLEAAK              | 22  | 676   | 0.44 | 0.16 | 37  |
| 10 T03F1.3                   | ALDNPARPFLAILGGAK       | 12  | 2441  | 0.44 | 0.13 | 30  |
| 10 T03F1.3                   | IQLIK                   | 11  | 1078  | 0.44 | 0.40 | 92  |
| 10 T03F1.3                   | ITNNQRIAAAVPTIQHALSNGAK | 31  | 6901  | 0.44 | 0.06 | 14  |
| 7 T03F1.3                    | IFAAAIQRAK              | 32  | 4921  | 0.45 | 0.17 | 38  |
| 10 T03F1.3                   | ALDNPARPFLAILGGAK       | 18  | 1470  | 0.46 | 0.31 | 68  |
| 22 T03F1.3                   | ATAAGAITIIGGGDTATAAK    | 96  | 3369  | 0.46 | 0.13 | 28  |
| 22 T03F1.3                   | YTLKPVAEELK             | 22  | 12599 | 0.46 | 0.37 | 80  |
| 10 T03F1.3                   | ITNNQRIAAAVPTIQHALSNGAK | 41  | 8795  | 0.46 | 0.13 | 28  |
| 7 T03F1.3                    | LAIDQLNLAGK             | 47  | 2462  | 0.46 | 0.09 | 20  |
| 7 T03F1.3                    | YTLKPVAEELK             | 27  | 4213  | 0.47 | 0.09 | 20  |
| 10 T03F1.3                   | ITNNQRIAAAVPTIQHALSNGAK | 49  | 7626  | 0.48 | 0.15 | 31  |
| 10 T03F1.3                   | ITNNQRIAAAVPTIQHALSNGAK | 59  | 11662 | 0.48 | 0.22 | 46  |
| 22 T03F1.3                   | VSHVSTGGGASLELLEGK      | 69  | 3778  | 0.49 | 0.35 | 73  |
| 1 T03F1.3                    | ITNNQRIAAAVPTIQHALSNGAK | 42  | 5872  | 0.49 | 0.09 | 17  |
| 7 T03F1.3                    | IFAAAIQRAK              | 40  | 6390  | 0.51 | 0.10 | 20  |
| 22 T03F1.3                   | NELSYFSK                | 39  | 4062  | 0.51 | 0.20 | 39  |
| 10 T03F1.3                   | GVQIHLPVDFVIADK         | 18  | 4019  | 0.51 | 0.16 | 30  |
| 10 T03F1.3                   | GVQIHLPVDFVIADK         | 17  | 3854  | 0.52 | 0.25 | 48  |
| 22 T03F1.3                   | ALDNPARPFLAILGGAK       | 32  | 2004  | 0.52 | 0.17 | 33  |
| 10 T03F1.3                   | ITNNQRIAAAVPTIQHALSNGAK | 59  | 8755  | 0.52 | 0.15 | 28  |
| 7 T03F1.3                    | LAIDQLNLAGK             | 57  | 1720  | 0.52 | 0.19 | 35  |
| 1 T03F1.3                    | YTLKPVAEELK             | 26  | 9914  | 0.52 | 0.29 | 56  |
| 1 T03F1.3                    | LAIDQLNLAGK             | 80  | 2094  | 0.53 | 0.09 | 17  |
| 22 T03F1.3                   | LAIDQLNLAGK             | 37  | 1798  | 0.53 | 0.20 | 39  |

|            |                         |     |       |      |      |    |
|------------|-------------------------|-----|-------|------|------|----|
| 22 T03F1.3 | NELSYFSK                | 36  | 7211  | 0.54 | 0.10 | 19 |
| 10 T03F1.3 | ALDNPARPFLAILGGAK       | 26  | 1382  | 0.54 | 0.05 | 9  |
| 10 T03F1.3 | SLMDEVVK                | 24  | 3266  | 0.54 | 0.09 | 17 |
| 10 T03F1.3 | ATAAGAITIIGGGDTATAAK    | 60  | 2337  | 0.55 | 0.21 | 38 |
| 10 T03F1.3 | IVNELLEAAK              | 46  | 891   | 0.55 | 0.20 | 37 |
| 22 T03F1.3 | SLMDEVVK                | 21  | 2180  | 0.55 | 0.18 | 32 |
| 10 T03F1.3 | SLMDEVVK                | 25  | 2753  | 0.55 | 0.04 | 7  |
| 22 T03F1.3 | IFAAAIQRAK              | 65  | 8110  | 0.56 | 0.12 | 22 |
| 10 T03F1.3 | SLMDEVVK                | 24  | 2126  | 0.56 | 0.12 | 22 |
| 22 T03F1.3 | IVNELLEAAK              | 47  | 791   | 0.57 | 0.12 | 21 |
| 10 T03F1.3 | IFAAAIQRAK              | 40  | 6658  | 0.57 | 0.09 | 16 |
| 10 T03F1.3 | SLMDEVVK                | 19  | 2284  | 0.58 | 0.10 | 17 |
| 10 T03F1.3 | IFAAAIQRAK              | 41  | 7873  | 0.59 | 0.12 | 21 |
| 1 T03F1.3  | LAIDQLNLAGK             | 76  | 1851  | 0.59 | 0.11 | 19 |
| 1 T03F1.3  | IFAAAIQRAK              | 73  | 5248  | 0.60 | 0.13 | 22 |
| 1 T03F1.3  | IVNELLEAAK              | 29  | 751   | 0.60 | 0.24 | 39 |
| 10 T03F1.3 | IVNELLEAAK              | 69  | 6127  | 0.60 | 0.05 | 9  |
| 10 T03F1.3 | YTLKPVAEELK             | 23  | 6494  | 0.61 | 0.33 | 55 |
| 10 T03F1.3 | LAIDQLNLAGK             | 53  | 1854  | 0.61 | 0.17 | 29 |
| 10 T03F1.3 | TIVWNGPAGVFEFDK         | 32  | 978   | 0.61 | 0.13 | 22 |
| 10 T03F1.3 | ATAAGAITIIGGGDTATAAK    | 120 | 3848  | 0.62 | 0.12 | 20 |
| 10 T03F1.3 | ITNNQRIAAAVPTIQHALSNGAK | 50  | 12468 | 0.62 | 0.22 | 35 |
| 1 T03F1.3  | IVNELLEAAK              | 43  | 1361  | 0.62 | 0.11 | 18 |
| 1 T03F1.3  | LAIDQLNLAGK             | 19  | 444   | 0.62 | 0.12 | 20 |
| 10 T03F1.3 | ATAAGAITIIGGGDTATAAK    | 152 | 6546  | 0.62 | 0.14 | 22 |
| 7 T03F1.3  | GVQIHLPVDFVIADK         | 43  | 2373  | 0.62 | 0.09 | 14 |
| 10 T03F1.3 | VSHVSTGGGASLELLEGK      | 60  | 5440  | 0.62 | 0.14 | 22 |
| 10 T03F1.3 | ATAAGAITIIGGGDTATAAK    | 71  | 2304  | 0.63 | 0.13 | 21 |
| 22 T03F1.3 | NELSYFSK                | 31  | 6789  | 0.63 | 0.24 | 38 |
| 22 T03F1.3 | YTLKPVAEELK             | 19  | 4362  | 0.63 | 0.23 | 36 |
| 1 T03F1.3  | NELSYFSK                | 19  | 824   | 0.63 | 0.16 | 26 |
| 22 T03F1.3 | YTLKPVAEELK             | 18  | 13124 | 0.63 | 0.34 | 53 |
| 10 T03F1.3 | TIVWNGPAGVFEFDK         | 31  | 1119  | 0.64 | 0.25 | 40 |
| 22 T03F1.3 | IFAAAIQRAK              | 51  | 9250  | 0.64 | 0.10 | 15 |
| 7 T03F1.3  | ATAAGAITIIGGGDTATAAK    | 94  | 4050  | 0.64 | 0.13 | 20 |
| 10 T03F1.3 | YTLKPVAEELK             | 32  | 12747 | 0.64 | 0.38 | 60 |
| 1 T03F1.3  | VSHVSTGGGASLELLEGK      | 36  | 1257  | 0.64 | 0.21 | 33 |
| 7 T03F1.3  | NELSYFSK                | 24  | 3981  | 0.65 | 0.14 | 21 |
| 10 T03F1.3 | VSHVSTGGGASLELLEGK      | 59  | 5999  | 0.65 | 0.12 | 18 |
| 1 T03F1.3  | IVNELLEAAK              | 63  | 3678  | 0.65 | 0.13 | 21 |
| 7 T03F1.3  | LAIDQLNLAGK             | 18  | 711   | 0.65 | 0.10 | 15 |
| 22 T03F1.3 | NELSYFSK                | 50  | 2444  | 0.65 | 0.11 | 17 |
| 22 T03F1.3 | ALDNPARPFLAILGGAK       | 36  | 1439  | 0.65 | 0.23 | 35 |
| 22 T03F1.3 | ATAAGAITIIGGGDTATAAK    | 85  | 2967  | 0.66 | 0.07 | 11 |
| 10 T03F1.3 | VSHVSTGGGASLELLEGK      | 87  | 5689  | 0.66 | 0.12 | 17 |
| 10 T03F1.3 | NELSYFSK                | 13  | 1954  | 0.67 | 0.34 | 51 |
| 22 T03F1.3 | ATAAGAITIIGGGDTATAAK    | 93  | 3059  | 0.67 | 0.15 | 23 |
| 22 T03F1.3 | IFAAAIQRAK              | 30  | 5834  | 0.67 | 0.17 | 25 |
| 10 T03F1.3 | NELSYFSK                | 37  | 3022  | 0.68 | 0.28 | 41 |
| 7 T03F1.3  | NELSYFSK                | 27  | 1051  | 0.68 | 0.07 | 11 |
| 1 T03F1.3  | VSHVSTGGGASLELLEGK      | 62  | 1257  | 0.68 | 0.17 | 25 |
| 10 T03F1.3 | ALDNPARPFLAILGGAK       | 26  | 1478  | 0.68 | 0.13 | 19 |
| 22 T03F1.3 | ALDNPARPFLAILGGAK       | 14  | 3801  | 0.68 | 0.11 | 16 |
| 1 T03F1.3  | IFAAAIQRAK              | 35  | 3906  | 0.68 | 0.06 | 9  |
| 22 T03F1.3 | NELSYFSK                | 49  | 2078  | 0.69 | 0.24 | 36 |
| 7 T03F1.3  | YTLKPVAEELK             | 32  | 5233  | 0.69 | 0.11 | 16 |
| 22 T03F1.3 | ITNNQRIAAAVPTIQHALSNGAK | 49  | 11188 | 0.69 | 0.27 | 39 |
| 22 T03F1.3 | IVNELLEAAK              | 54  | 4949  | 0.69 | 0.11 | 16 |
| 7 T03F1.3  | IFAAAIQRAK              | 31  | 5428  | 0.69 | 0.19 | 28 |
| 10 T03F1.3 | ALDNPARPFLAILGGAK       | 30  | 2440  | 0.70 | 0.19 | 27 |
| 10 T03F1.3 | IVNELLEAAK              | 42  | 3080  | 0.70 | 0.08 | 11 |
| 10 T03F1.3 | IVNELLEAAK              | 57  | 6662  | 0.71 | 0.08 | 12 |
| 22 T03F1.3 | IFAAAIQRAK              | 42  | 6471  | 0.72 | 0.08 | 11 |
| 7 T03F1.3  | GVQIHLPVDFVIADK         | 63  | 2910  | 0.72 | 0.12 | 17 |
| 10 T03F1.3 | LAIDQLNLAGK             | 51  | 2692  | 0.72 | 0.18 | 25 |
| 10 T03F1.3 | IVNELLEAAK              | 52  | 5330  | 0.72 | 0.15 | 20 |
| 22 T03F1.3 | NELSYFSK                | 31  | 3234  | 0.72 | 0.25 | 35 |
| 7 T03F1.3  | ALDNPARPFLAILGGAK       | 28  | 2380  | 0.73 | 0.32 | 45 |
| 10 T03F1.3 | GVQIHLPVDFVIADK         | 50  | 4551  | 0.73 | 0.14 | 19 |
| 10 T03F1.3 | GVQIHLPVDFVIADK         | 65  | 5091  | 0.73 | 0.10 | 14 |
| 22 T03F1.3 | VSHVSTGGGASLELLEGK      | 34  | 3011  | 0.74 | 0.25 | 33 |
| 10 T03F1.3 | ITNNQRIAAAVPTIQHALSNGAK | 53  | 8941  | 0.74 | 0.16 | 22 |
| 10 T03F1.3 | IVNELLEAAK              | 42  | 6906  | 0.74 | 0.14 | 18 |
| 1 T03F1.3  | NELSYFSK                | 30  | 1747  | 0.75 | 0.15 | 21 |
| 10 T03F1.3 | ALDNPARPFLAILGGAK       | 11  | 3837  | 0.75 | 0.19 | 25 |
| 22 T03F1.3 | IVNELLEAAK              | 26  | 524   | 0.75 | 0.16 | 21 |
| 10 T03F1.3 | IFAAAIQRAK              | 22  | 4771  | 0.76 | 0.15 | 19 |
| 10 T03F1.3 | IVNELLEAAK              | 51  | 5398  | 0.77 | 0.14 | 18 |
| 10 T03F1.3 | IFAAAIQRAK              | 47  | 8168  | 0.77 | 0.11 | 15 |
| 7 T03F1.3  | LAIDQLNLAGK             | 50  | 970   | 0.77 | 0.12 | 15 |
| 7 T03F1.3  | ATAAGAITIIGGGDTATAAK    | 124 | 2946  | 0.77 | 0.12 | 16 |
| 1 T03F1.3  | IVNELLEAAK              | 44  | 1126  | 0.77 | 0.09 | 12 |
| 7 T03F1.3  | YTLKPVAEELK             | 18  | 10735 | 0.78 | 0.32 | 41 |
| 22 T03F1.3 | IVNELLEAAK              | 53  | 5105  | 0.78 | 0.17 | 21 |
| 22 T03F1.3 | GVQIHLPVDFVIADK         | 11  | 2516  | 0.79 | 0.19 | 24 |
| 10 T03F1.3 | IVNELLEAAK              | 25  | 695   | 0.79 | 0.16 | 20 |
| 10 T03F1.3 | ITNNQRIAAAVPTIQHALSNGAK | 33  | 7984  | 0.79 | 0.18 | 22 |
| 22 T03F1.3 | ITNNQRIAAAVPTIQHALSNGAK | 52  | 14590 | 0.79 | 0.24 | 30 |
| 1 T03F1.3  | IVNELLEAAK              | 24  | 867   | 0.80 | 0.16 | 20 |
| 10 T03F1.3 | NELSYFSK                | 43  | 7182  | 0.80 | 0.14 | 18 |
| 1 T03F1.3  | LAIDQLNLAGK             | 70  | 1718  | 0.80 | 0.11 | 13 |
| 10 T03F1.3 | NELSYFSK                | 24  | 1775  | 0.80 | 0.30 | 37 |
| 22 T03F1.3 | GVQIHLPVDFVIADK         | 32  | 3119  | 0.81 | 0.09 | 11 |
| 1 T03F1.3  | NELSYFSK                | 19  | 656   | 0.81 | 0.21 | 26 |
| 10 T03F1.3 | GVQIHLPVDFVIADK         | 42  | 3043  | 0.81 | 0.13 | 16 |
| 10 T03F1.3 | NELSYFSK                | 15  | 5200  | 0.81 | 0.17 | 21 |
| 7 T03F1.3  | IVNELLEAAK              | 25  | 810   | 0.81 | 0.09 | 10 |
| 22 T03F1.3 | ATAAGAITIIGGGDTATAAK    | 103 | 3178  | 0.82 | 0.12 | 15 |
| 1 T03F1.3  | IVNELLEAAK              | 60  | 3388  | 0.82 | 0.09 | 11 |
| 22 T03F1.3 | ITNNQRIAAAVPTIQHALSNGAK | 55  | 16388 | 0.82 | 0.19 | 23 |
| 7 T03F1.3  | IFAAAIQRAK              | 27  | 4868  | 0.82 | 0.09 | 11 |

|            |                         |    |       |      |      |    |
|------------|-------------------------|----|-------|------|------|----|
| 1 T03F1.3  | NELSYFSK                | 43 | 2483  | 0.82 | 0.11 | 13 |
| 7 T03F1.3  | LAIDQLNLAGK             | 82 | 2518  | 0.82 | 0.14 | 17 |
| 10 T03F1.3 | IFAAAIQRAK              | 23 | 5011  | 0.83 | 0.19 | 23 |
| 10 T03F1.3 | GVQIHLPVDFVIADK         | 24 | 3787  | 0.83 | 0.16 | 20 |
| 10 T03F1.3 | LAIDQLNLAGK             | 27 | 1411  | 0.83 | 0.18 | 22 |
| 7 T03F1.3  | LAIDQLNLAGK             | 34 | 1393  | 0.83 | 0.19 | 23 |
| 22 T03F1.3 | GVQIHLPVDFVIADK         | 16 | 3233  | 0.83 | 0.15 | 18 |
| 22 T03F1.3 | ALDNPARPFLAILGGAK       | 14 | 1688  | 0.83 | 0.06 | 7  |
| 10 T03F1.3 | ALDNPARPFLAILGGAK       | 25 | 2965  | 0.84 | 0.20 | 24 |
| 22 T03F1.3 | GVQIHLPVDFVIADK         | 13 | 1138  | 0.84 | 0.12 | 14 |
| 10 T03F1.3 | IFAAAIQRAK              | 73 | 10445 | 0.84 | 0.11 | 13 |
| 22 T03F1.3 | ALDNPARPFLAILGGAK       | 25 | 1817  | 0.84 | 0.17 | 20 |
| 1 T03F1.3  | GVQIHLPVDFVIADK         | 33 | 2282  | 0.84 | 0.12 | 15 |
| 22 T03F1.3 | LAIDQLNLAGK             | 28 | 1378  | 0.84 | 0.13 | 16 |
| 10 T03F1.3 | LAIDQLNLAGK             | 66 | 8148  | 0.85 | 0.10 | 12 |
| 10 T03F1.3 | YTLKPVAEELK             | 22 | 16345 | 0.86 | 0.34 | 39 |
| 10 T03F1.3 | ALDNPARPFLAILGGAK       | 46 | 2146  | 0.86 | 0.11 | 13 |
| 1 T03F1.3  | GVQIHLPVDFVIADK         | 25 | 2616  | 0.86 | 0.11 | 13 |
| 10 T03F1.3 | LAIDQLNLAGK             | 42 | 2162  | 0.87 | 0.15 | 17 |
| 22 T03F1.3 | ALDNPARPFLAILGGAK       | 24 | 3048  | 0.87 | 0.22 | 26 |
| 1 T03F1.3  | TVTAEEGVPDGHMGLDVGPESK  | 15 | 4435  | 0.87 | 0.31 | 36 |
| 22 T03F1.3 | LAIDQLNLAGK             | 73 | 2449  | 0.87 | 0.12 | 13 |
| 10 T03F1.3 | YTLKPVAEELK             | 25 | 11024 | 0.88 | 0.18 | 20 |
| 22 T03F1.3 | ALDNPARPFLAILGGAK       | 20 | 1919  | 0.88 | 0.47 | 53 |
| 22 T03F1.3 | LAIDQLNLAGK             | 29 | 1623  | 0.89 | 0.13 | 15 |
| 10 T03F1.3 | IVNELLEAAK              | 47 | 5069  | 0.89 | 0.09 | 10 |
| 1 T03F1.3  | IFAAAIQRAK              | 12 | 1868  | 0.89 | 0.12 | 13 |
| 22 T03F1.3 | YTLKPVAEELK             | 43 | 8281  | 0.89 | 0.48 | 54 |
| 10 T03F1.3 | NELSYFSK                | 48 | 6963  | 0.90 | 0.14 | 15 |
| 1 T03F1.3  | LAIDQLNLAGK             | 69 | 1385  | 0.90 | 0.13 | 14 |
| 7 T03F1.3  | NELSYFSK                | 20 | 1537  | 0.90 | 0.13 | 15 |
| 22 T03F1.3 | ATAAGAITIIGGGDTATAAK    | 87 | 2595  | 0.90 | 0.08 | 9  |
| 22 T03F1.3 | IGNSLYDEEGAK            | 30 | 1167  | 0.90 | 0.29 | 32 |
| 7 T03F1.3  | NELSYFSK                | 16 | 1349  | 0.91 | 0.14 | 16 |
| 7 T03F1.3  | IFAAAIQRAK              | 25 | 4122  | 0.91 | 0.10 | 11 |
| 1 T03F1.3  | GVQIHLPVDFVIADK         | 27 | 1960  | 0.91 | 0.10 | 11 |
| 1 T03F1.3  | IVNELLEAAK              | 67 | 4073  | 0.92 | 0.14 | 15 |
| 10 T03F1.3 | GVQIHLPVDFVIADK         | 15 | 2011  | 0.93 | 0.08 | 9  |
| 22 T03F1.3 | IFAAAIQRAK              | 47 | 8941  | 0.93 | 0.14 | 15 |
| 10 T03F1.3 | LAIDQLNLAGK             | 60 | 1289  | 0.93 | 0.22 | 23 |
| 1 T03F1.3  | IFAAAIQRAK              | 39 | 4526  | 0.94 | 0.08 | 9  |
| 10 T03F1.3 | ATAAGAITIIGGGDTATAAK    | 68 | 2890  | 0.95 | 0.19 | 20 |
| 10 T03F1.3 | GVQIHLPVDFVIADK         | 48 | 7325  | 0.95 | 0.06 | 6  |
| 22 T03F1.3 | NELSYFSK                | 18 | 4808  | 0.96 | 0.16 | 16 |
| 10 T03F1.3 | GVQIHLPVDFVIADK         | 53 | 6875  | 0.96 | 0.09 | 9  |
| 10 T03F1.3 | IVNELLEAAK              | 56 | 3125  | 0.96 | 0.11 | 11 |
| 7 T03F1.3  | YTLKPVAEELK             | 20 | 10877 | 0.96 | 0.27 | 28 |
| 22 T03F1.3 | GVQIHLPVDFVIADK         | 32 | 2895  | 0.96 | 0.39 | 41 |
| 7 T03F1.3  | IFAAAIQRAK              | 37 | 4548  | 0.96 | 0.12 | 12 |
| 10 T03F1.3 | IFAAAIQRAK              | 41 | 6991  | 0.97 | 0.17 | 17 |
| 7 T03F1.3  | IVNELLEAAK              | 41 | 526   | 0.97 | 0.22 | 22 |
| 10 T03F1.3 | YTLKPVAEELK             | 22 | 13205 | 0.98 | 0.25 | 26 |
| 7 T03F1.3  | LAIDQLNLAGK             | 43 | 1023  | 0.99 | 0.16 | 17 |
| 1 T03F1.3  | IVNELLEAAK              | 65 | 3507  | 0.99 | 0.05 | 5  |
| 7 T03F1.3  | IVNELLEAAK              | 45 | 1540  | 0.99 | 0.16 | 16 |
| 1 T03F1.3  | IFAAAIQRAK              | 21 | 1910  | 0.99 | 0.08 | 8  |
| 7 T03F1.3  | IFAAAIQRAK              | 45 | 7741  | 0.99 | 0.08 | 9  |
| 10 T03F1.3 | LAIDQLNLAGK             | 57 | 6854  | 1.01 | 0.14 | 14 |
| 22 T03F1.3 | ITNNQRIAAAVPTIQHALSNGAK | 30 | 3867  | 1.02 | 0.22 | 22 |
| 7 T03F1.3  | LAIDQLNLAGK             | 42 | 1170  | 1.02 | 0.20 | 19 |
| 10 T03F1.3 | ATAAGAITIIGGGDTATAAK    | 73 | 2057  | 1.02 | 0.18 | 17 |
| 1 T03F1.3  | GVQIHLPVDFVIADK         | 13 | 2285  | 1.04 | 0.12 | 11 |
| 1 T03F1.3  | ATAAGAITIIGGGDTATAAK    | 92 | 3539  | 1.06 | 0.12 | 11 |
| 7 T03F1.3  | LAIDQLNLAGK             | 49 | 1297  | 1.06 | 0.11 | 10 |
| 7 T03F1.3  | YTLKPVAEELK             | 15 | 4225  | 1.06 | 0.05 | 4  |
| 10 T03F1.3 | VSHVSTGGGASLELLEGK      | 45 | 4430  | 1.06 | 0.11 | 11 |
| 22 T03F1.3 | GVQIHLPVDFVIADK         | 27 | 3230  | 1.07 | 0.37 | 35 |
| 22 T03F1.3 | LAIDQLNLAGK             | 50 | 4683  | 1.07 | 0.16 | 15 |
| 22 T03F1.3 | ALDNPARPFLAILGGAK       | 23 | 2016  | 1.07 | 0.16 | 15 |
| 22 T03F1.3 | IVNELLEAAK              | 59 | 1818  | 1.08 | 0.12 | 11 |
| 10 T03F1.3 | GVQIHLPVDFVIADK         | 19 | 3431  | 1.09 | 0.25 | 23 |
| 22 T03F1.3 | IFAAAIQRAK              | 40 | 6611  | 1.09 | 0.15 | 14 |
| 22 T03F1.3 | IFAAAIQRAK              | 39 | 6927  | 1.09 | 0.06 | 6  |
| 22 T03F1.3 | ITNNQRIAAAVPTIQHALSNGAK | 54 | 7109  | 1.09 | 0.10 | 9  |
| 22 T03F1.3 | IVNELLEAAK              | 43 | 1270  | 1.09 | 0.06 | 6  |
| 22 T03F1.3 | IFAAAIQRAK              | 44 | 6522  | 1.10 | 0.14 | 13 |
| 10 T03F1.3 | IFAAAIQRAK              | 57 | 9039  | 1.10 | 0.13 | 12 |
| 1 T03F1.3  | VSHVSTGGGASLELLEGK      | 68 | 3936  | 1.10 | 0.08 | 7  |
| 1 T03F1.3  | IVNELLEAAK              | 55 | 1032  | 1.10 | 0.15 | 13 |
| 10 T03F1.3 | GVQIHLPVDFVIADK         | 27 | 7356  | 1.10 | 0.13 | 12 |
| 1 T03F1.3  | IFAAAIQRAK              | 49 | 3128  | 1.11 | 0.10 | 9  |
| 22 T03F1.3 | LAIDQLNLAGK             | 77 | 6160  | 1.11 | 0.08 | 7  |
| 22 T03F1.3 | IFAAAIQRAK              | 72 | 10525 | 1.12 | 0.16 | 14 |
| 10 T03F1.3 | NELSYFSK                | 15 | 4180  | 1.12 | 0.06 | 5  |
| 1 T03F1.3  | LAIDQLNLAGK             | 57 | 994   | 1.13 | 0.19 | 16 |
| 10 T03F1.3 | GVQIHLPVDFVIADK         | 40 | 6473  | 1.15 | 0.08 | 7  |
| 7 T03F1.3  | IGNSLYDEEGAK            | 21 | 1082  | 1.16 | 0.25 | 22 |
| 7 T03F1.3  | IFAAAIQRAK              | 50 | 5261  | 1.17 | 0.10 | 8  |
| 22 T03F1.3 | ALDNPARPFLAILGGAK       | 14 | 910   | 1.18 | 0.22 | 19 |
| 22 T03F1.3 | YTLKPVAEELK             | 33 | 9369  | 1.18 | 0.11 | 9  |
| 22 T03F1.3 | GVQIHLPVDFVIADK         | 78 | 4535  | 1.21 | 0.09 | 7  |
| 1 T03F1.3  | ATAAGAITIIGGGDTATAAK    | 92 | 1465  | 1.22 | 0.10 | 9  |
| 7 T03F1.3  | LAIDQLNLAGK             | 57 | 1806  | 1.22 | 0.14 | 11 |
| 1 T03F1.3  | LAIDQLNLAGK             | 54 | 695   | 1.23 | 0.12 | 10 |
| 1 T03F1.3  | IFAAAIQRAK              | 53 | 4030  | 1.23 | 0.15 | 12 |
| 22 T03F1.3 | LAIDQLNLAGK             | 14 | 698   | 1.23 | 0.28 | 22 |
| 10 T03F1.3 | TIVWNGPAGVFEFDK         | 38 | 854   | 1.24 | 0.14 | 11 |
| 22 T03F1.3 | LAIDQLNLAGK             | 50 | 1639  | 1.24 | 0.11 | 9  |
| 22 T03F1.3 | GVQIHLPVDFVIADK         | 42 | 3723  | 1.24 | 0.09 | 7  |
| 7 T03F1.3  | YTLKPVAEELK             | 19 | 3358  | 1.26 | 0.20 | 16 |
| 10 T03F1.3 | TIVWNGPAGVFEFDK         | 33 | 992   | 1.27 | 0.10 | 8  |

|                      |                           |     |       |      |      |    |
|----------------------|---------------------------|-----|-------|------|------|----|
| 7 T03F1.3            | YTLKPVAEELK               | 11  | 5415  | 1.28 | 0.21 | 17 |
| 22 T03F1.3           | IFAAAIQRAK                | 51  | 9886  | 1.29 | 0.12 | 9  |
| 10 T03F1.3           | GVQIHLPVDFVIADK           | 57  | 9329  | 1.29 | 0.10 | 8  |
| 1 T03F1.3            | VSHVSTGGGASLELEGK         | 50  | 1300  | 1.30 | 0.23 | 17 |
| 1 T03F1.3            | ATAAGAITIIGGGDTATAAK      | 87  | 2584  | 1.30 | 0.12 | 9  |
| 10 T03F1.3           | LAIDQLNLAGK               | 45  | 1573  | 1.31 | 0.20 | 15 |
| 7 T03F1.3            | LAIDQLNLAGK               | 67  | 2030  | 1.31 | 0.17 | 13 |
| 22 T03F1.3           | GVQIHLPVDFVIADK           | 30  | 3485  | 1.31 | 0.20 | 15 |
| 7 T03F1.3            | LAIDQLNLAGK               | 64  | 2189  | 1.32 | 0.10 | 8  |
| 1 T03F1.3            | ALDNPARPFLAILGGAK         | 10  | 678   | 1.32 | 0.12 | 9  |
| 10 T03F1.3           | IFAAAIQRAK                | 36  | 6008  | 1.33 | 0.11 | 8  |
| 22 T03F1.3           | GVQIHLPVDFVIADK           | 14  | 3466  | 1.34 | 0.20 | 15 |
| 10 T03F1.3           | VSHVSTGGGASLELEGK         | 11  | 2816  | 1.34 | 0.14 | 11 |
| 7 T03F1.3            | GVQIHLPVDFVIADK           | 20  | 3055  | 1.34 | 0.12 | 9  |
| 7 T03F1.3            | IVNELLEAAK                | 26  | 793   | 1.34 | 0.13 | 10 |
| 10 T03F1.3           | GVQIHLPVDFVIADK           | 51  | 10404 | 1.35 | 0.08 | 6  |
| 1 T03F1.3            | LAIDQLNLAGK               | 76  | 2161  | 1.36 | 0.09 | 6  |
| 22 T03F1.3           | IVNELLEAAK                | 56  | 4110  | 1.37 | 0.12 | 9  |
| 10 T03F1.3           | LAIDQLNLAGK               | 27  | 1158  | 1.37 | 0.44 | 32 |
| 7 T03F1.3            | IVNELLEAAK                | 38  | 977   | 1.38 | 0.17 | 12 |
| 7 T03F1.3            | IVNELLEAAK                | 64  | 1439  | 1.39 | 0.08 | 6  |
| 1 T03F1.3            | TVTAEEGVDPDGHMGLDVGPRESSK | 22  | 2793  | 1.43 | 0.12 | 8  |
| 1 T03F1.3            | LAIDQLNLAGK               | 33  | 1180  | 1.44 | 0.18 | 13 |
| 7 T03F1.3            | IFAAAIQRAK                | 52  | 3344  | 1.46 | 0.11 | 7  |
| 22 T03F1.3           | IVNELLEAAK                | 46  | 3796  | 1.47 | 0.06 | 4  |
| 7 T03F1.3            | IVNELLEAAK                | 29  | 551   | 1.48 | 0.15 | 10 |
| 7 T03F1.3            | IFAAAIQRAK                | 39  | 2859  | 1.48 | 0.09 | 6  |
| 22 T03F1.3           | GVQIHLPVDFVIADK           | 53  | 6486  | 1.49 | 0.11 | 7  |
| 22 T03F1.3           | TIVWNGPAGVFEFDK           | 38  | 901   | 1.50 | 0.18 | 12 |
| 1 T03F1.3            | IFAAAIQRAK                | 37  | 3337  | 1.51 | 0.14 | 10 |
| 1 T03F1.3            | VSHVSTGGGASLELEGK         | 82  | 3341  | 1.51 | 0.09 | 6  |
| 1 T03F1.3            | TIVWNGPAGVFEFDK           | 18  | 452   | 1.52 | 0.15 | 10 |
| 22 T03F1.3           | GVQIHLPVDFVIADK           | 46  | 5309  | 1.54 | 0.12 | 8  |
| 22 T03F1.3           | TIVWNGPAGVFEFDK           | 48  | 1307  | 1.54 | 0.06 | 4  |
| 7 T03F1.3            | IGNSLYDEEGAK              | 29  | 1203  | 1.58 | 0.18 | 11 |
| 22 T03F1.3           | GVQIHLPVDFVIADK           | 21  | 6643  | 1.63 | 0.03 | 2  |
| 1 T03F1.3            | VSHVSTGGGASLELEGK         | 44  | 955   | 1.66 | 0.06 | 4  |
| 1 T03F1.3            | ATAAGAITIIGGGDTATAAK      | 78  | 1194  | 1.69 | 0.13 | 8  |
| 7 T03F1.3            | GVQIHLPVDFVIADK           | 26  | 2237  | 1.69 | 0.16 | 9  |
| 22 T03F1.3           | GVQIHLPVDFVIADK           | 68  | 6030  | 1.73 | 0.11 | 6  |
| 22 T03F1.3           | ALDNPARPFLAILGGAK         | 13  | 1229  | 1.75 | 0.29 | 17 |
| 22 T03F1.3           | GVQIHLPVDFVIADK           | 67  | 4739  | 1.80 | 0.07 | 4  |
| 22 T03F1.3           | GVQIHLPVDFVIADK           | 73  | 5088  | 1.82 | 0.13 | 7  |
| 7 T03F1.3            | ATAAGAITIIGGGDTATAAK      | 126 | 3838  | 1.82 | 0.15 | 8  |
| 10 T03F1.3           | LAIDQLNLAGK               | 67  | 1775  | 1.84 | 0.14 | 8  |
| 7 T03F1.3            | IFAAAIQRAK                | 36  | 5604  | 1.88 | 0.14 | 8  |
| 10 T03F1.3           | LAIDQLNLAGK               | 49  | 1620  | 1.90 | 0.12 | 6  |
| 7 T03F1.3            | GVQIHLPVDFVIADK           | 40  | 2498  | 1.94 | 0.14 | 7  |
| 7 T03F1.3            | IVNELLEAAK                | 31  | 1139  | 1.95 | 0.12 | 6  |
| 7 T03F1.3            | IFAAAIQRAK                | 37  | 4848  | 1.96 | 0.11 | 6  |
| 10 T03F1.3           | IQLIK                     | 11  | 788   | 1.99 | 0.12 | 6  |
| 7 T03F1.3            | ATAAGAITIIGGGDTATAAK      | 121 | 3683  | 2.04 | 0.12 | 6  |
| 7 T03F1.3            | GVQIHLPVDFVIADK           | 22  | 2098  | 2.15 | 0.12 | 6  |
| 7 T03F1.3            | IVNELLEAAK                | 30  | 676   | 2.31 | 0.07 | 3  |
| 7 T03F1.3            | GVQIHLPVDFVIADK           | 46  | 2286  | 2.55 | 0.14 | 6  |
| 7 T03F1.3            | GVQIHLPVDFVIADK           | 22  | 1895  | 2.57 | 0.06 | 2  |
| 7 T03F1.3            | IVNELLEAAK                | 41  | 1646  | 3.06 | 0.07 | 2  |
| 1 T03F1.3            | YTLKPVAEELK               | 27  | 1568  | 3.37 | 0.47 | 14 |
| 7 T03F1.3            | YTLKPVAEELK               | 15  | 5907  | 5.55 | 0.38 | 7  |
| 22 T03F1.8a;T03F1.8b | EFVDLLRDDLEK              | 20  | 2368  | 0.85 | 0.15 | 18 |
| 22 T03F1.8a;T03F1.8b | EFVDLLRDDLEK              | 23  | 2539  | 0.87 | 0.07 | 8  |
| 7 T03F6.1            | QSVWSSAIAAK               | 15  | 1582  | 0.93 | 0.12 | 13 |
| 7 T03F6.1            | WTTETSSRPSSGALLK          | 44  | 1407  | 0.94 | 0.19 | 20 |
| 1 T03F6.1            | AAVHHLTSSSLAAK            | 21  | 7188  | 1.00 | 0.12 | 12 |
| 7 T03F6.1            | QSVWSSAIAAK               | 28  | 1593  | 1.03 | 0.11 | 11 |
| 1 T03F6.1            | AAVHHLTSSSLAAK            | 11  | 4087  | 1.13 | 0.31 | 28 |
| 1 T03F6.1            | WTTETSSRPSSGALLK          | 20  | 944   | 1.17 | 0.09 | 8  |
| 7 T03F6.1            | VIVYGGK                   | 14  | 2022  | 1.28 | 0.21 | 16 |
| 1 T03F6.1            | AAVHHLTSSSLAAK            | 16  | 1953  | 1.32 | 0.16 | 12 |
| 1 T03F6.1            | QSVWSSAIAAK               | 26  | 960   | 2.07 | 0.12 | 6  |
| 22 T03F6.1;R08B4.5   | WTTETSSRPSSGALLK          | 40  | 2677  | 0.70 | 0.14 | 21 |
| 10 T03F6.1;R08B4.5   | AAVHHLTSSSLAAK            | 27  | 5147  | 0.86 | 0.10 | 12 |
| 22 T03F6.1;R08B4.5   | AAVHHLTSSSLAAK            | 18  | 6723  | 0.88 | 0.06 | 7  |
| 22 T03F6.1;R08B4.5   | AAVHHLTSSSLAAK            | 49  | 5997  | 1.05 | 0.09 | 9  |
| 22 T03F6.1;R08B4.5   | AAVHHLTSSSLAAK            | 12  | 7290  | 1.05 | 0.11 | 11 |
| 22 T03F6.1;R08B4.5   | AAVHHLTSSSLAAK            | 17  | 8229  | 1.08 | 0.21 | 19 |
| 22 T03F6.1;R08B4.5   | WTTETSSRPSSGALLK          | 47  | 2562  | 1.12 | 0.13 | 12 |
| 10 T03F6.1;R08B4.5   | VIVYGGK                   | 12  | 2463  | 1.14 | 0.14 | 12 |
| 10 T03F6.1;R08B4.5   | WTTETSSRPSSGALLK          | 47  | 2099  | 1.22 | 0.20 | 16 |
| 10 T03F6.1;R08B4.5   | WTTETSSRPSSGALLK          | 49  | 3247  | 1.22 | 0.13 | 11 |
| 22 T03F6.1;R08B4.5   | WTTETSSRPSSGALLK          | 42  | 2827  | 1.42 | 0.14 | 10 |
| 22 T03F6.1;R08B4.5   | AAVHHLTSSSLAAK            | 12  | 5577  | 1.47 | 0.11 | 8  |
| 10 T03F6.1;R08B4.5   | VIVYGGK                   | 11  | 2354  | 1.65 | 0.09 | 5  |
| 22 T03F6.1;R08B4.5   | GALGSAILEFFK              | 81  | 2630  | 3.32 | 0.13 | 4  |
| 7 T03F6.3            | VAEFAARYVVTK              | 34  | 3728  | 0.92 | 0.13 | 14 |
| 1 T03F6.3            | VAEFAARYVVTK              | 27  | 2482  | 0.92 | 0.12 | 13 |
| 22 T03F6.3           | VAEFAARYVVTK              | 36  | 2915  | 1.00 | 0.49 | 49 |
| 1 T03F6.3            | VAEFAARYVVTK              | 38  | 2243  | 1.07 | 0.04 | 3  |
| 10 T03F6.3           | VAEFAARYVVTK              | 40  | 3694  | 1.10 | 0.10 | 9  |
| 10 T03F6.3           | VAEFAARYVVTK              | 25  | 2203  | 1.12 | 0.09 | 8  |
| 7 T03F6.3            | VAEFAARYVVTK              | 16  | 2487  | 1.35 | 0.21 | 16 |
| 1 T03F6.3            | YLVGLPTGSTPLGMYK          | 14  | 458   | 1.48 | 0.31 | 21 |
| 10 T04A8.7a          | TIAFWLMDK                 | 14  | 813   | 0.82 | 0.17 | 20 |
| 10 T04A8.7a          | GLEWAPAAEK                | 22  | 4761  | 1.02 | 0.20 | 20 |
| 1 T04A8.7a           | QFGLNVQPDNSVK             | 27  | 2113  | 1.11 | 0.11 | 10 |
| 1 T04A8.7a           | QFGLNVQPDNSVK             | 12  | 1738  | 1.12 | 0.14 | 12 |
| 22 T04A8.7a          | TIAFWLMDK                 | 36  | 918   | 1.14 | 0.10 | 9  |
| 22 T04A8.7a          | QFGLNVQPDNSVK             | 26  | 2479  | 1.25 | 0.17 | 14 |
| 22 T04A8.7a          | GLEWAPAAEK                | 11  | 4994  | 1.26 | 0.21 | 17 |
| 22 T04A8.7a          | TIAFWLMDK                 | 38  | 1328  | 1.27 | 0.11 | 9  |
| 22 T04A8.7a          | GLEWAPAAEK                | 13  | 3635  | 1.34 | 0.16 | 12 |

|             |                      |     |       |      |      |     |
|-------------|----------------------|-----|-------|------|------|-----|
| 10 T04A8.7a | TIAFWLMDK            | 29  | 337   | 1.34 | 0.12 | 9   |
| 22 T04A8.7a | GLEWAPAAEK           | 52  | 3857  | 1.37 | 0.19 | 14  |
| 10 T04A8.7a | TIAFWLMDK            | 18  | 1018  | 1.43 | 0.15 | 11  |
| 10 T04A8.7a | IAVSRHGATHFK         | 19  | 17730 | 1.46 | 0.17 | 11  |
| 22 T04A8.7a | TIAFWLMDK            | 51  | 1716  | 1.55 | 0.10 | 6   |
| 1 T04A8.7a  | HVAYAESHDAQLVGDK     | 55  | 6836  | 1.59 | 0.13 | 8   |
| 1 T04A8.7a  | HVAYAESHDAQLVGDK     | 49  | 7133  | 1.77 | 0.18 | 10  |
| 22 T04A8.7a | HVAYAESHDAQLVGDK     | 16  | 6378  | 2.03 | 0.24 | 12  |
| 7 T04A8.7a  | IAVSRHGATHFK         | 12  | 1439  | 2.13 | 0.62 | 29  |
| 10 T04A8.7a | HVAYAESHDAQLVGDK     | 27  | 7601  | 2.28 | 0.26 | 11  |
| 10 T04A8.7a | HVAYAESHDAQLVGDK     | 17  | 5578  | 3.01 | 0.15 | 5   |
| 22 T04F3.1  | DFGLPGLK             | 13  | 2025  | 0.77 | 0.07 | 10  |
| 7 T04F3.1   | DFGLPGLK             | 23  | 5584  | 0.89 | 0.18 | 20  |
| 1 T05B11.3  | TLQLSHDENLK          | 49  | 1809  | 0.36 | 0.16 | 44  |
| 10 T05B11.3 | TLQLSHDENLK          | 52  | 3684  | 0.72 | 0.18 | 25  |
| 10 T05B11.3 | TLQLSHDENLK          | 39  | 3027  | 0.90 | 0.12 | 13  |
| 22 T05B11.3 | GPSPILSTVPRIAEK      | 14  | 540   | 0.92 | 0.31 | 34  |
| 22 T05B11.3 | TLQLSHDENLK          | 27  | 1000  | 1.26 | 0.12 | 9   |
| 22 T05B11.3 | TLQLSHDENLK          | 54  | 2729  | 1.29 | 0.12 | 9   |
| 22 T05B11.3 | TLQLSHDENLK          | 65  | 2490  | 1.34 | 0.13 | 10  |
| 7 T05B11.3  | GPSPILSTVPRIAEK      | 15  | 635   | 1.62 | 0.22 | 13  |
| 7 T05B11.3  | TLQLSHDENLK          | 42  | 2581  | 1.70 | 0.17 | 10  |
| 7 T05B11.3  | TLQLSHDENLK          | 51  | 3385  | 1.74 | 0.18 | 10  |
| 7 T05B11.3  | GPSPILSTVPRIAEK      | 24  | 722   | 2.05 | 0.22 | 11  |
| 1 T05B11.3  | GPSPILSTVPRIAEK      | 15  | 408   | 2.10 | 0.24 | 12  |
| 22 T05C12.3 | VALVTGGGTGIGK        | 37  | 1249  | 1.29 | 0.17 | 13  |
| 10 T05C12.7 | AQLIPQLQHLK          | 20  | 964   | 0.23 | 0.29 | 126 |
| 1 T05C12.7  | AQLIPQLQHLK          | 11  | 1256  | 0.30 | 0.13 | 44  |
| 22 T05C12.7 | AQLIPQLQHLK          | 15  | 3378  | 0.31 | 0.06 | 21  |
| 10 T05C12.7 | AQLIPQLQHLK          | 24  | 6828  | 0.34 | 0.15 | 44  |
| 22 T05C12.7 | AQLIPQLQHLK          | 20  | 5586  | 0.41 | 0.12 | 30  |
| 22 T05C12.7 | AQLIPQLQHLK          | 17  | 2454  | 0.42 | 0.12 | 29  |
| 10 T05C12.7 | AQLIPQLQHLK          | 21  | 8784  | 0.44 | 0.14 | 32  |
| 7 T05C12.7  | AQLIPQLQHLK          | 19  | 2653  | 0.50 | 0.14 | 28  |
| 22 T05C12.7 | AQLIPQLQHLK          | 33  | 6409  | 0.52 | 0.17 | 32  |
| 10 T05C12.7 | VLASNAARDSTDLVTK     | 74  | 4751  | 0.55 | 0.24 | 43  |
| 22 T05C12.7 | AQLIPQLQHLK          | 17  | 769   | 0.58 | 0.15 | 26  |
| 22 T05C12.7 | EAGILEPALS           | 20  | 1802  | 0.58 | 0.12 | 20  |
| 22 T05C12.7 | VLASNAARDSTDLVTK     | 37  | 1461  | 0.58 | 0.25 | 43  |
| 22 T05C12.7 | SSLGPVGDK            | 12  | 3699  | 0.62 | 0.10 | 17  |
| 22 T05C12.7 | MLVDDVGDVIVTNDGATILK | 107 | 1408  | 0.64 | 0.17 | 27  |
| 7 T05C12.7  | VTYPINAVNVLK         | 18  | 4192  | 0.65 | 0.11 | 17  |
| 1 T05C12.7  | QLEVEHPAGK           | 53  | 9525  | 0.70 | 0.10 | 15  |
| 1 T05C12.7  | QLEVEHPAGK           | 39  | 9457  | 0.71 | 0.06 | 9   |
| 7 T05C12.7  | QLEVEHPAGK           | 47  | 6044  | 0.71 | 0.13 | 18  |
| 10 T05C12.7 | QLEVEHPAGK           | 46  | 12504 | 0.72 | 0.06 | 9   |
| 10 T05C12.7 | AQLIPQLQHLK          | 13  | 3836  | 0.72 | 0.09 | 12  |
| 10 T05C12.7 | VLASNAARDSTDLVTK     | 58  | 5157  | 0.75 | 0.08 | 11  |
| 22 T05C12.7 | EAGILEPALS           | 22  | 1547  | 0.75 | 0.13 | 17  |
| 22 T05C12.7 | VLASNAARDSTDLVTK     | 69  | 5639  | 0.75 | 0.18 | 24  |
| 10 T05C12.7 | QLEVEHPAGK           | 50  | 12059 | 0.76 | 0.06 | 9   |
| 22 T05C12.7 | QLEVEHPAGK           | 42  | 12489 | 0.76 | 0.08 | 10  |
| 1 T05C12.7  | EAGILEPALS           | 11  | 1045  | 0.76 | 0.04 | 6   |
| 22 T05C12.7 | VLASNAARDSTDLVTK     | 12  | 1628  | 0.77 | 0.22 | 28  |
| 22 T05C12.7 | SSLGPVGDK            | 11  | 2892  | 0.77 | 0.19 | 25  |
| 22 T05C12.7 | QLEVEHPAGK           | 40  | 13693 | 0.78 | 0.06 | 7   |
| 7 T05C12.7  | VLASNAARDSTDLVTK     | 35  | 1397  | 0.79 | 0.21 | 27  |
| 10 T05C12.7 | VLASNAARDSTDLVTK     | 57  | 4602  | 0.83 | 0.13 | 15  |
| 22 T05C12.7 | AQLIPQLQHLK          | 23  | 4966  | 0.83 | 0.11 | 13  |
| 22 T05C12.7 | EAGILEPALS           | 22  | 1389  | 0.84 | 0.16 | 19  |
| 7 T05C12.7  | QLEVEHPAGK           | 38  | 4877  | 0.84 | 0.03 | 4   |
| 10 T05C12.7 | QLEVEHPAGK           | 47  | 13807 | 0.85 | 0.09 | 11  |
| 7 T05C12.7  | AQLIPQLQHLK          | 15  | 3857  | 0.85 | 0.29 | 34  |
| 10 T05C12.7 | VLASNAARDSTDLVTK     | 54  | 4584  | 0.85 | 0.15 | 17  |
| 1 T05C12.7  | VTYPINAVNVLK         | 12  | 1588  | 0.85 | 0.11 | 13  |
| 10 T05C12.7 | AQLIPQLQHLK          | 23  | 3644  | 0.88 | 0.13 | 15  |
| 22 T05C12.7 | QLEVEHPAGK           | 56  | 14770 | 0.89 | 0.09 | 11  |
| 22 T05C12.7 | AQLIPQLQHLK          | 11  | 3903  | 0.90 | 0.10 | 11  |
| 10 T05C12.7 | VTYPINAVNVLK         | 16  | 2539  | 0.90 | 0.11 | 12  |
| 1 T05C12.7  | VLASNAARDSTDLVTK     | 45  | 1862  | 0.91 | 0.10 | 11  |
| 7 T05C12.7  | QLEVEHPAGK           | 37  | 1456  | 0.92 | 0.10 | 11  |
| 7 T05C12.7  | VTYPINAVNVLK         | 13  | 3048  | 0.92 | 0.42 | 46  |
| 22 T05C12.7 | AQLIPQLQHLK          | 18  | 1106  | 0.92 | 0.05 | 6   |
| 7 T05C12.7  | AQLIPQLQHLK          | 19  | 3004  | 0.93 | 0.07 | 8   |
| 10 T05C12.7 | VTYPINAVNVLK         | 16  | 2015  | 0.94 | 0.12 | 13  |
| 7 T05C12.7  | QLEVEHPAGK           | 44  | 4660  | 0.96 | 0.05 | 5   |
| 7 T05C12.7  | RADELVK              | 12  | 1023  | 0.97 | 0.15 | 15  |
| 22 T05C12.7 | VTYPINAVNVLK         | 14  | 1982  | 0.98 | 0.14 | 15  |
| 22 T05C12.7 | AQLIPQLQHLK          | 19  | 4251  | 0.98 | 0.10 | 10  |
| 7 T05C12.7  | AQLIPQLQHLK          | 12  | 4096  | 1.00 | 0.23 | 23  |
| 10 T05C12.7 | QLEVEHPAGK           | 47  | 14804 | 1.01 | 0.04 | 4   |
| 7 T05C12.7  | VLASNAARDSTDLVTK     | 43  | 3046  | 1.03 | 0.17 | 17  |
| 22 T05C12.7 | VTYPINAVNVLK         | 38  | 2892  | 1.04 | 0.15 | 14  |
| 7 T05C12.7  | AQLIPQLQHLK          | 17  | 2867  | 1.04 | 0.11 | 10  |
| 22 T05C12.7 | VLASNAARDSTDLVTK     | 21  | 2028  | 1.05 | 0.26 | 24  |
| 1 T05C12.7  | VTYPINAVNVLK         | 15  | 1245  | 1.05 | 0.17 | 16  |
| 7 T05C12.7  | QLEVEHPAGK           | 40  | 6597  | 1.07 | 0.10 | 9   |
| 22 T05C12.7 | QLEVEHPAGK           | 51  | 13402 | 1.09 | 0.08 | 7   |
| 1 T05C12.7  | VTYPINAVNVLK         | 15  | 1199  | 1.11 | 0.10 | 9   |
| 10 T05C12.7 | SSLGPVGDK            | 16  | 4113  | 1.12 | 0.11 | 10  |
| 10 T05C12.7 | SSLGPVGDK            | 19  | 8199  | 1.14 | 0.09 | 8   |
| 1 T05C12.7  | VLASNAARDSTDLVTK     | 48  | 1927  | 1.16 | 0.13 | 11  |
| 1 T05C12.7  | SSLGPVGDK            | 27  | 4508  | 1.21 | 0.14 | 12  |
| 7 T05C12.7  | AQLIPQLQHLK          | 19  | 3703  | 1.22 | 0.13 | 11  |
| 7 T05C12.7  | SARESVLVK            | 11  | 1468  | 1.22 | 0.05 | 4   |
| 1 T05C12.7  | SARESVLVK            | 12  | 2052  | 1.23 | 0.13 | 11  |
| 10 T05C12.7 | VLASNAARDSTDLVTK     | 74  | 7021  | 1.25 | 0.11 | 9   |
| 7 T05C12.7  | VLASNAARDSTDLVTK     | 44  | 2983  | 1.26 | 0.16 | 13  |
| 1 T05C12.7  | AQLIPQLQHLK          | 10  | 1806  | 1.28 | 0.02 | 1   |
| 1 T05C12.7  | SSLGPVGDK            | 19  | 4140  | 1.33 | 0.10 | 8   |
| 10 T05C12.7 | SSLGPVGDK            | 26  | 7362  | 1.41 | 0.12 | 8   |

|             |                       |     |       |       |      |     |
|-------------|-----------------------|-----|-------|-------|------|-----|
| 22 T05C12.7 | AQLIPQLQHLK           | 17  | 3385  | 1.45  | 0.08 | 6   |
| 22 T05C12.7 | AQLIPQLQHLK           | 24  | 3786  | 1.53  | 0.09 | 6   |
| 10 T05C12.7 | AQLIPQLQHLK           | 19  | 4738  | 1.81  | 0.07 | 4   |
| 10 T05C12.7 | AQLIPQLQHLK           | 28  | 3621  | 1.84  | 0.17 | 9   |
| 1 T05C12.7  | MLVDDVGDVIVTNDGATILK  | 37  | 586   | 2.01  | 0.11 | 5   |
| 22 T05D4.1  | AQEDELRSIANAIVTPGK    | 62  | 5062  | 0.32  | 0.17 | 54  |
| 22 T05D4.1  | AQEDELRSIANAIVTPGK    | 53  | 3642  | 0.32  | 0.12 | 38  |
| 1 T05D4.1   | YRQLLFTAGADLNK        | 14  | 1390  | 0.34  | 0.13 | 40  |
| 1 T05D4.1   | YRQLLFTAGADLNK        | 28  | 926   | 0.35  | 0.08 | 23  |
| 22 T05D4.1  | AQEDELRSIANAIVTPGK    | 35  | 12108 | 0.39  | 0.15 | 39  |
| 10 T05D4.1  | TDDGKPFTALLQEQGIIPGIK | 37  | 7836  | 0.39  | 0.05 | 13  |
| 1 T05D4.1   | YRQLLFTAGADLNK        | 19  | 1540  | 0.42  | 0.20 | 48  |
| 10 T05D4.1  | AQEDELRSIANAIVTPGK    | 43  | 20929 | 0.46  | 0.09 | 20  |
| 1 T05D4.1   | YRQLLFTAGADLNK        | 15  | 1048  | 0.46  | 0.08 | 18  |
| 22 T05D4.1  | AQEDELRSIANAIVTPGK    | 29  | 7671  | 0.46  | 0.25 | 54  |
| 10 T05D4.1  | AQEDELRSIANAIVTPGK    | 35  | 3659  | 0.48  | 0.17 | 34  |
| 10 T05D4.1  | AQEDELRSIANAIVTPGK    | 29  | 5695  | 0.49  | 0.14 | 29  |
| 22 T05D4.1  | RLNSIGLENTEENRRK      | 21  | 26018 | 0.49  | 0.34 | 70  |
| 1 T05D4.1   | AQEDELRSIANAIVTPGK    | 37  | 1829  | 0.49  | 0.14 | 29  |
| 1 T05D4.1   | YRQLLFTAGADLNK        | 11  | 664   | 0.51  | 0.15 | 29  |
| 7 T05D4.1   | GILAADESTGSMDK        | 70  | 1853  | 0.53  | 0.21 | 40  |
| 7 T05D4.1   | AQEDELRSIANAIVTPGK    | 27  | 4127  | 0.53  | 0.33 | 63  |
| 10 T05D4.1  | AQEDELRSIANAIVTPGK    | 42  | 2841  | 0.53  | 0.15 | 29  |
| 7 T05D4.1   | RLNSIGLENTEENRRK      | 16  | 1349  | 0.54  | 0.24 | 44  |
| 22 T05D4.1  | RLNSIGLENTEENRRK      | 11  | 3059  | 0.54  | 0.15 | 27  |
| 22 T05D4.1  | RLNSIGLENTEENRRK      | 23  | 3048  | 0.54  | 0.09 | 16  |
| 1 T05D4.1   | AQEDELRSIANAIVTPGK    | 13  | 2040  | 0.58  | 0.15 | 27  |
| 1 T05D4.1   | AQEDELRSIANAIVTPGK    | 35  | 2081  | 0.61  | 0.11 | 19  |
| 10 T05D4.1  | YRQLLFTAGADLNK        | 21  | 2310  | 0.62  | 0.15 | 24  |
| 7 T05D4.1   | AQEDELRSIANAIVTPGK    | 13  | 3224  | 0.63  | 0.08 | 12  |
| 22 T05D4.1  | AQEDELRSIANAIVTPGK    | 11  | 2956  | 0.63  | 0.26 | 41  |
| 1 T05D4.1   | AQEDELRSIANAIVTPGK    | 33  | 924   | 0.63  | 0.17 | 27  |
| 7 T05D4.1   | GILAADESTGSMDK        | 43  | 4229  | 0.64  | 0.25 | 39  |
| 7 T05D4.1   | RLNSIGLENTEENRRK      | 22  | 38851 | 0.69  | 0.17 | 24  |
| 10 T05D4.1  | YRQLLFTAGADLNK        | 26  | 2534  | 0.70  | 0.20 | 29  |
| 10 T05D4.1  | ISSTTPSVTALK          | 71  | 46378 | 0.70  | 0.09 | 13  |
| 7 T05D4.1   | RLNSIGLENTEENRRK      | 13  | 28496 | 0.71  | 0.17 | 24  |
| 10 T05D4.1  | RLNSIGLENTEENRRK      | 11  | 22204 | 0.74  | 0.45 | 62  |
| 10 T05D4.1  | ISSTTPSVTALK          | 59  | 28596 | 0.75  | 0.27 | 37  |
| 1 T05D4.1   | AQEDELRSIANAIVTPGK    | 35  | 1324  | 0.75  | 0.11 | 15  |
| 7 T05D4.1   | GILAADESTGSMDK        | 62  | 4939  | 0.79  | 0.21 | 26  |
| 10 T05D4.1  | AQEDELRSIANAIVTPGK    | 12  | 2856  | 0.80  | 0.13 | 16  |
| 22 T05D4.1  | YRQLLFTAGADLNK        | 27  | 2747  | 0.80  | 0.17 | 22  |
| 7 T05D4.1   | GILAADESTGSMDK        | 77  | 3775  | 0.80  | 0.14 | 18  |
| 7 T05D4.1   | YRQLLFTAGADLNK        | 37  | 2640  | 0.83  | 0.34 | 41  |
| 22 T05D4.1  | GILAADESTGSMDK        | 88  | 3519  | 0.86  | 0.07 | 8   |
| 10 T05D4.1  | GILAADESTGSMDK        | 60  | 3075  | 0.86  | 0.19 | 22  |
| 7 T05D4.1   | GILAADESTGSMDK        | 92  | 4482  | 0.88  | 0.10 | 12  |
| 10 T05D4.1  | GILAADESTGSMDK        | 63  | 3582  | 0.91  | 0.42 | 46  |
| 22 T05D4.1  | GILAADESTGSMDK        | 67  | 3722  | 0.96  | 0.28 | 29  |
| 1 T05D4.1   | RLNSIGLENTEENRRK      | 13  | 20466 | 0.97  | 0.06 | 6   |
| 22 T05D4.1  | RLNSIGLENTEENRRK      | 13  | 37330 | 1.01  | 0.18 | 18  |
| 22 T05D4.1  | RLNSIGLENTEENRRK      | 22  | 40592 | 1.03  | 0.22 | 22  |
| 1 T05D4.1   | RLNSIGLENTEENRRK      | 13  | 14951 | 1.05  | 0.12 | 12  |
| 22 T05D4.1  | GILAADESTGSMDK        | 81  | 3335  | 1.06  | 0.13 | 13  |
| 10 T05D4.1  | YRQLLFTAGADLNK        | 29  | 3077  | 1.07  | 0.22 | 21  |
| 22 T05D4.1  | YRQLLFTAGADLNK        | 34  | 4112  | 1.07  | 0.16 | 15  |
| 22 T05D4.1  | YRQLLFTAGADLNK        | 25  | 4713  | 1.07  | 0.11 | 11  |
| 10 T05D4.1  | YRQLLFTAGADLNK        | 12  | 1543  | 1.08  | 0.19 | 17  |
| 10 T05D4.1  | YRQLLFTAGADLNK        | 13  | 2379  | 1.18  | 0.16 | 14  |
| 22 T05D4.1  | YRQLLFTAGADLNK        | 29  | 3421  | 1.21  | 0.08 | 7   |
| 22 T05D4.1  | AQEDELRSIANAIVTPGK    | 20  | 3459  | 1.23  | 0.09 | 7   |
| 22 T05D4.1  | AQEDELRSIANAIVTPGK    | 34  | 2805  | 1.26  | 0.11 | 9   |
| 10 T05D4.1  | GILAADESTGSMDK        | 82  | 4756  | 1.29  | 0.08 | 7   |
| 10 T05D4.1  | YRQLLFTAGADLNK        | 36  | 5685  | 1.30  | 0.09 | 7   |
| 22 T05D4.1  | GILAADESTGSMDK        | 44  | 2794  | 1.34  | 0.17 | 13  |
| 10 T05D4.1  | YRQLLFTAGADLNK        | 24  | 1562  | 1.35  | 0.09 | 7   |
| 7 T05D4.1   | YRQLLFTAGADLNK        | 17  | 3556  | 1.38  | 0.16 | 11  |
| 10 T05D4.1  | GILAADESTGSMDK        | 56  | 2181  | 1.46  | 0.10 | 7   |
| 1 T05D4.1   | GILAADESTGSMDK        | 93  | 2690  | 1.46  | 0.15 | 11  |
| 10 T05D4.1  | YRQLLFTAGADLNK        | 17  | 2511  | 1.49  | 0.24 | 16  |
| 1 T05D4.1   | ISSTTPSVTALK          | 27  | 3365  | 1.52  | 0.48 | 32  |
| 10 T05D4.1  | GILAADESTGSMDK        | 42  | 2013  | 1.62  | 0.14 | 9   |
| 1 T05D4.1   | GILAADESTGSMDK        | 84  | 3096  | 1.62  | 0.15 | 9   |
| 10 T05D4.1  | GILAADESTGSMDK        | 88  | 4678  | 1.65  | 0.07 | 4   |
| 22 T05D4.1  | RLNSIGLENTEENRRK      | 10  | 14928 | 1.77  | 0.18 | 10  |
| 1 T05D4.1   | GILAADESTGSMDK        | 103 | 4128  | 1.83  | 0.11 | 6   |
| 1 T05D4.1   | ISSTTPSVTALK          | 25  | 2196  | 1.84  | 0.23 | 12  |
| 10 T05D4.1  | YRQLLFTAGADLNK        | 20  | 1762  | 1.95  | 0.11 | 5   |
| 1 T05D4.1   | YRQLLFTAGADLNK        | 25  | 948   | 1.99  | 0.33 | 17  |
| 1 T05D4.1   | GILAADESTGSMDK        | 104 | 3566  | 2.10  | 0.18 | 9   |
| 22 T05D4.1  | RLNSIGLENTEENRRK      | 11  | 7989  | 2.21  | 0.14 | 6   |
| 7 T05D4.1   | YRQLLFTAGADLNK        | 24  | 3180  | 2.54  | 0.12 | 5   |
| 7 T05D4.1   | YRQLLFTAGADLNK        | 26  | 4155  | 2.56  | 0.28 | 11  |
| 1 T05E11.1  | TIAECLADELINAAK       | 51  | 945   | 0.86  | 0.21 | 25  |
| 7 T05E11.1  | TIAECLADELINAAK       | 72  | 2718  | 0.96  | 0.14 | 14  |
| 7 T05E11.1  | TIAECLADELINAAK       | 71  | 2772  | 1.03  | 0.05 | 5   |
| 1 T05E11.1  | TIAECLADELINAAK       | 44  | 865   | 1.06  | 0.17 | 16  |
| 22 T05E11.1 | GSSNSYAIK             | 34  | 3093  | 1.12  | 0.09 | 8   |
| 22 T05E11.1 | GSSNSYAIK             | 23  | 9294  | 1.65  | 0.26 | 16  |
| 1 T05E11.1  | TIAECLADELINAAK       | 41  | 1210  | 2.77  | 0.22 | 8   |
| 7 T05E11.1  | GSSNSYAIK             | 38  | 3498  | 2.88  | 0.16 | 6   |
| 1 T05E11.1  | TIAECLADELINAAK       | 49  | 1482  | 4.48  | 0.35 | 8   |
| 22 T05E11.1 | TIAECLADELINAAK       | 33  | 5239  | 6.17  | 0.06 | 1   |
| 7 T05E11.1  | TIAECLADELINAAK       | 43  | 2354  | 6.76  | 0.08 | 1   |
| 22 T05E11.1 | TIAECLADELINAAK       | 62  | 8383  | 15.82 | 0.28 | 2   |
| 22 T05E11.1 | TIAECLADELINAAK       | 68  | 3734  | 18.54 | 0.39 | 2   |
| 22 T05E11.3 | AVVSQRLVK             | 24  | 2353  | 0.19  | 0.81 | 428 |
| 1 T05E11.3  | EEAADFLEPDTLK         | 26  | 1156  | 0.22  | 0.18 | 82  |
| 10 T05E11.3 | RVTASEEDTTAASTAK      | 88  | 1968  | 0.22  | 0.17 | 74  |
| 10 T05E11.3 | RVTASEEDTTAASTAK      | 84  | 2090  | 0.25  | 0.19 | 77  |

|             |                      |    |       |      |      |     |
|-------------|----------------------|----|-------|------|------|-----|
| 10 T05E11.3 | VIENIK               | 21 | 1021  | 0.25 | 0.25 | 100 |
| 10 T05E11.3 | EEAADFLEPDTLK        | 27 | 2120  | 0.33 | 0.21 | 64  |
| 10 T05E11.3 | EVETSPFVERLIAK       | 44 | 1073  | 0.34 | 0.24 | 69  |
| 10 T05E11.3 | EEAADFLEPDTLK        | 30 | 2517  | 0.37 | 0.19 | 52  |
| 10 T05E11.3 | RGTQITLYLK           | 17 | 1364  | 0.39 | 0.09 | 24  |
| 10 T05E11.3 | LIINSLYRNK           | 14 | 965   | 0.42 | 0.10 | 23  |
| 7 T05E11.3  | RGTQITLYLK           | 29 | 2608  | 0.44 | 0.44 | 99  |
| 1 T05E11.3  | LIINSLYRNK           | 17 | 764   | 0.45 | 0.19 | 42  |
| 22 T05E11.3 | EVETSPFVERLIAK       | 51 | 3252  | 0.45 | 0.14 | 32  |
| 10 T05E11.3 | RGTQITLYLK           | 22 | 1594  | 0.45 | 0.21 | 46  |
| 7 T05E11.3  | RGTQITLYLK           | 19 | 1254  | 0.50 | 0.38 | 75  |
| 1 T05E11.3  | EEAADFLEPDTLK        | 30 | 1032  | 0.51 | 0.07 | 14  |
| 10 T05E11.3 | RGTQITLYLK           | 30 | 2089  | 0.53 | 0.27 | 51  |
| 1 T05E11.3  | EVETSPFVERLIAK       | 20 | 1137  | 0.53 | 0.11 | 20  |
| 1 T05E11.3  | LDGLSVSQIK           | 40 | 1121  | 0.53 | 0.07 | 13  |
| 10 T05E11.3 | VLDMLK               | 13 | 1717  | 0.55 | 0.13 | 23  |
| 10 T05E11.3 | EVETSPFVERLIAK       | 32 | 3588  | 0.56 | 0.07 | 13  |
| 1 T05E11.3  | LDGLSVSQIK           | 41 | 1456  | 0.57 | 0.22 | 38  |
| 10 T05E11.3 | VLDMLK               | 28 | 2000  | 0.58 | 0.09 | 15  |
| 22 T05E11.3 | EVETSPFVERLIAK       | 32 | 2850  | 0.58 | 0.09 | 15  |
| 1 T05E11.3  | AVVSQRLVK            | 13 | 1899  | 0.59 | 0.08 | 14  |
| 10 T05E11.3 | RGTQITLYLK           | 36 | 2649  | 0.59 | 0.19 | 32  |
| 1 T05E11.3  | LLRFQSSNDADK         | 14 | 988   | 0.60 | 0.19 | 31  |
| 22 T05E11.3 | QDAIYYMAGTSRK        | 39 | 5305  | 0.61 | 0.10 | 16  |
| 7 T05E11.3  | AVVSQRLVK            | 12 | 5188  | 0.61 | 0.23 | 37  |
| 10 T05E11.3 | VLDMLK               | 20 | 1303  | 0.62 | 0.10 | 15  |
| 10 T05E11.3 | EEAADFLEPDTLK        | 17 | 2246  | 0.62 | 0.19 | 31  |
| 10 T05E11.3 | VLDMLK               | 15 | 1338  | 0.62 | 0.12 | 18  |
| 1 T05E11.3  | EEAADFLEPDTLK        | 33 | 1079  | 0.63 | 0.09 | 14  |
| 10 T05E11.3 | EVETSPFVERLIAK       | 37 | 3014  | 0.63 | 0.15 | 23  |
| 10 T05E11.3 | AVVSQRLVK            | 24 | 3283  | 0.64 | 0.11 | 17  |
| 1 T05E11.3  | RVTASEEDTTAASTAK     | 20 | 249   | 0.64 | 0.04 | 6   |
| 22 T05E11.3 | EEAADFLEPDTLK        | 29 | 3842  | 0.65 | 0.14 | 22  |
| 10 T05E11.3 | LDGLSVSQIK           | 35 | 2211  | 0.65 | 0.16 | 25  |
| 22 T05E11.3 | EEAADFLEPDTLK        | 37 | 2877  | 0.66 | 0.19 | 28  |
| 10 T05E11.3 | VLDMLK               | 19 | 2018  | 0.67 | 0.07 | 10  |
| 10 T05E11.3 | EVETSPFVERLIAK       | 29 | 2866  | 0.67 | 0.22 | 32  |
| 1 T05E11.3  | TTTLAAYVERMK         | 13 | 305   | 0.68 | 0.16 | 24  |
| 22 T05E11.3 | AVVSQRLVK            | 16 | 5289  | 0.68 | 0.21 | 31  |
| 10 T05E11.3 | EEAADFLEPDTLK        | 42 | 5251  | 0.69 | 0.13 | 19  |
| 7 T05E11.3  | AVVSQRLVK            | 16 | 2558  | 0.69 | 0.08 | 12  |
| 22 T05E11.3 | EVETSPFVERLIAK       | 29 | 1576  | 0.70 | 0.21 | 31  |
| 22 T05E11.3 | TFEINPRHPVIK         | 13 | 4915  | 0.71 | 0.17 | 23  |
| 10 T05E11.3 | EVETSPFVERLIAK       | 24 | 3381  | 0.72 | 0.19 | 26  |
| 10 T05E11.3 | EEAADFLEPDTLK        | 39 | 4472  | 0.72 | 0.13 | 18  |
| 10 T05E11.3 | LDGLSVSQIK           | 44 | 1882  | 0.74 | 0.12 | 16  |
| 1 T05E11.3  | EVETSPFVERLIAK       | 13 | 626   | 0.76 | 0.33 | 44  |
| 22 T05E11.3 | EVETSPFVERLIAK       | 15 | 1512  | 0.78 | 0.20 | 25  |
| 22 T05E11.3 | EVETSPFVERLIAK       | 37 | 2977  | 0.80 | 0.15 | 19  |
| 10 T05E11.3 | EVETSPFVERLIAK       | 30 | 3487  | 0.82 | 0.08 | 10  |
| 22 T05E11.3 | QDAIYYMAGTSRK        | 63 | 5768  | 0.84 | 0.19 | 22  |
| 1 T05E11.3  | EVETSPFVERLIAK       | 32 | 900   | 0.85 | 0.15 | 18  |
| 1 T05E11.3  | AVVSQRLVK            | 16 | 1545  | 0.88 | 0.16 | 18  |
| 7 T05E11.3  | EVETSPFVERLIAK       | 13 | 1440  | 0.89 | 0.04 | 5   |
| 10 T05E11.3 | VLDMLK               | 12 | 1270  | 0.89 | 0.09 | 10  |
| 22 T05E11.3 | EVETSPFVERLIAK       | 31 | 2033  | 0.92 | 0.20 | 21  |
| 22 T05E11.3 | TFEINPRHPVIK         | 14 | 4725  | 0.92 | 0.21 | 23  |
| 22 T05E11.3 | LLRFQSSNDADK         | 12 | 3958  | 0.92 | 0.13 | 14  |
| 22 T05E11.3 | EEAADFLEPDTLK        | 12 | 2547  | 0.95 | 0.13 | 14  |
| 1 T05E11.3  | LDGLSVSQIK           | 37 | 1020  | 0.95 | 0.19 | 20  |
| 10 T05E11.3 | EVETSPFVERLIAK       | 25 | 3350  | 0.97 | 0.18 | 18  |
| 7 T05E11.3  | AVVSQRLVK            | 11 | 1394  | 0.98 | 0.16 | 16  |
| 22 T05E11.3 | LLRFQSSNDADK         | 11 | 3363  | 1.00 | 0.13 | 13  |
| 10 T05E11.3 | LIINSLYRNK           | 11 | 805   | 1.02 | 0.13 | 12  |
| 10 T05E11.3 | TTTLAAYVERMK         | 39 | 1485  | 1.03 | 0.15 | 15  |
| 22 T05E11.3 | EVETSPFVERLIAK       | 27 | 2912  | 1.04 | 0.11 | 11  |
| 1 T05E11.3  | EVETSPFVERLIAK       | 32 | 1199  | 1.08 | 0.24 | 22  |
| 22 T05E11.3 | EVETSPFVERLIAK       | 32 | 2752  | 1.11 | 0.18 | 16  |
| 10 T05E11.3 | LLRFQSSNDADK         | 20 | 4498  | 1.12 | 0.15 | 13  |
| 10 T05E11.3 | QDAIYYMAGTSRK        | 36 | 3079  | 1.15 | 0.12 | 11  |
| 1 T05E11.3  | AVVSQRLVK            | 14 | 2604  | 1.15 | 0.41 | 35  |
| 1 T05E11.3  | TFEINPRHPVIK         | 11 | 1264  | 1.17 | 0.08 | 7   |
| 7 T05E11.3  | TFEINPRHPVIK         | 11 | 9047  | 1.19 | 0.18 | 15  |
| 10 T05E11.3 | LLRFQSSNDADK         | 10 | 2366  | 1.19 | 0.12 | 10  |
| 10 T05E11.3 | LLRFQSSNDADK         | 20 | 4652  | 1.22 | 0.09 | 7   |
| 1 T05E11.3  | AVVSQRLVK            | 11 | 1148  | 1.25 | 0.13 | 11  |
| 10 T05E11.3 | QDAIYYMAGTSRK        | 56 | 5510  | 1.26 | 0.13 | 11  |
| 1 T05E11.3  | TFEINPRHPVIK         | 16 | 2245  | 1.33 | 0.27 | 20  |
| 22 T05E11.3 | VLDMLK               | 12 | 840   | 1.46 | 0.25 | 17  |
| 22 T05E11.3 | AVVSQRLVK            | 13 | 4402  | 1.50 | 0.21 | 14  |
| 22 T05E11.3 | AVVSQRLVK            | 12 | 6433  | 1.54 | 0.10 | 6   |
| 1 T05E11.3  | AVVSQRLVK            | 12 | 785   | 1.60 | 0.10 | 6   |
| 22 T05E11.3 | VLDMLK               | 16 | 841   | 1.67 | 0.14 | 9   |
| 1 T05E11.3  | EVETSPFVERLIAK       | 13 | 858   | 1.68 | 0.18 | 11  |
| 10 T05E11.3 | AVVSQRLVK            | 29 | 4523  | 1.70 | 0.18 | 11  |
| 10 T05E11.3 | LDGLSVSQIK           | 72 | 2916  | 1.78 | 0.13 | 7   |
| 22 T05E11.3 | LLRFQSSNDADK         | 12 | 2376  | 2.34 | 0.18 | 8   |
| 22 T05E11.3 | AVVSQRLVK            | 17 | 3733  | 2.55 | 0.35 | 14  |
| 10 T05E11.3 | TFEINPRHPVIK         | 19 | 12710 | 3.62 | 0.21 | 6   |
| 10 T05E11.3 | TFEINPRHPVIK         | 18 | 12880 | 5.87 | 0.19 | 3   |
| 7 T05G5.6   | IADQSPLIVQMAK        | 76 | 4276  | 0.41 | 0.12 | 30  |
| 7 T05G5.6   | IADQSPLIVQMAK        | 51 | 2356  | 0.52 | 0.24 | 46  |
| 1 T05G5.6   | IFPADQVVGEAVK        | 12 | 1120  | 0.52 | 0.17 | 32  |
| 1 T05G5.6   | IADQSPLIVQMAK        | 32 | 1741  | 0.62 | 0.10 | 17  |
| 22 T05G5.6  | IADQSPLIVQMAK        | 48 | 5730  | 0.63 | 0.14 | 23  |
| 7 T05G5.6   | IFPADQVVGEAVK        | 26 | 5605  | 0.69 | 0.20 | 29  |
| 22 T05G5.6  | EGMTAFAEK            | 49 | 5993  | 0.74 | 0.12 | 16  |
| 7 T05G5.6   | IADQSPLIVQMAK        | 39 | 2099  | 0.74 | 0.16 | 22  |
| 1 T05G5.6   | IADQSPLIVQMAK        | 32 | 1165  | 0.74 | 0.17 | 23  |
| 10 T05G5.6  | SVGAIITGSERAFAAGADIK | 19 | 2897  | 0.76 | 0.28 | 37  |
| 1 T05G5.6   | IADQSPLIVQMAK        | 29 | 1317  | 0.78 | 0.11 | 14  |

|    |                     |                       |    |       |      |      |    |
|----|---------------------|-----------------------|----|-------|------|------|----|
| 10 | T05G5.6             | SVGAIVITGSERAFAAGADIK | 30 | 3186  | 0.83 | 0.13 | 16 |
| 22 | T05G5.6             | IFPADQVVGEAVK         | 18 | 3227  | 0.84 | 0.24 | 29 |
| 7  | T05G5.6             | IADQSPLIVQMAK         | 38 | 1844  | 0.86 | 0.19 | 22 |
| 10 | T05G5.6             | SVGAIVITGSERAFAAGADIK | 35 | 3149  | 0.87 | 0.17 | 20 |
| 10 | T05G5.6             | IFPADQVVGEAVK         | 12 | 4555  | 0.96 | 0.39 | 41 |
| 10 | T05G5.6             | IADQSPLIVQMAK         | 34 | 2715  | 0.96 | 0.17 | 18 |
| 1  | T05G5.6             | IADQSPLIVQMAK         | 25 | 1096  | 0.97 | 0.19 | 20 |
| 10 | T05G5.6             | IADQSPLIVQMAK         | 39 | 2911  | 1.00 | 0.14 | 14 |
| 1  | T05G5.6             | IADQSPLIVQMAK         | 15 | 897   | 1.05 | 0.05 | 4  |
| 22 | T05G5.6             | IFPADQVVGEAVK         | 12 | 3409  | 1.06 | 0.29 | 27 |
| 10 | T05G5.6             | SVGAIVITGSERAFAAGADIK | 65 | 2145  | 1.08 | 0.13 | 12 |
| 22 | T05G5.6             | IADQSPLIVQMAK         | 56 | 2395  | 1.11 | 0.10 | 9  |
| 1  | T05G5.6             | IADQSPLIVQMAK         | 40 | 1629  | 1.12 | 0.18 | 16 |
| 1  | T05G5.6             | IADQSPLIVQMAK         | 11 | 1028  | 1.16 | 0.18 | 16 |
| 22 | T05G5.6             | IFPADQVVGEAVK         | 66 | 3663  | 1.16 | 0.22 | 19 |
| 1  | T05G5.6             | IADQSPLIVQMAK         | 43 | 1865  | 1.21 | 0.18 | 15 |
| 22 | T05G5.6             | IADQSPLIVQMAK         | 62 | 2440  | 1.21 | 0.12 | 10 |
| 1  | T05G5.6             | IADQSPLIVQMAK         | 56 | 2201  | 1.26 | 0.13 | 10 |
| 1  | T05G5.6             | IADQSPLIVQMAK         | 23 | 1303  | 1.36 | 0.07 | 5  |
| 1  | T05G5.6             | IADQSPLIVQMAK         | 19 | 1776  | 1.36 | 0.13 | 9  |
| 1  | T05G5.6             | IADQSPLIVQMAK         | 22 | 835   | 1.43 | 0.29 | 20 |
| 1  | T05G5.6             | IADQSPLIVQMAK         | 36 | 1818  | 1.44 | 0.12 | 8  |
| 10 | T05G5.6             | IADQSPLIVQMAK         | 20 | 1311  | 1.50 | 0.20 | 13 |
| 22 | T05G5.6             | IADQSPLIVQMAK         | 31 | 1986  | 1.69 | 0.23 | 13 |
| 22 | T05G5.6             | IFPADQVVGEAVK         | 30 | 8035  | 1.73 | 0.24 | 14 |
| 22 | T05G5.6             | IADQSPLIVQMAK         | 13 | 1680  | 1.73 | 0.17 | 10 |
| 7  | T05G5.6             | IADQSPLIVQMAK         | 22 | 1378  | 1.78 | 0.07 | 4  |
| 1  | T05G5.6             | SVGAIVITGSERAFAAGADIK | 43 | 2370  | 1.88 | 0.09 | 5  |
| 7  | T05G5.6             | IADQSPLIVQMAK         | 30 | 1878  | 1.99 | 0.18 | 9  |
| 22 | T05G5.6             | IADQSPLIVQMAK         | 46 | 1890  | 2.03 | 0.22 | 11 |
| 1  | T05G5.6             | SVGAIVITGSERAFAAGADIK | 13 | 1474  | 2.78 | 0.10 | 4  |
| 10 | T05H10.6a;T05H10.6b | DRIITSSLATEEELK       | 23 | 3446  | 0.58 | 0.14 | 24 |
| 10 | T05H10.6a;T05H10.6b | DRIITSSLATEEELK       | 71 | 2798  | 0.59 | 0.21 | 35 |
| 10 | T05H10.6a;T05H10.6b | TRDPITGFK             | 26 | 15640 | 0.71 | 0.14 | 20 |
| 10 | T05H10.6a;T05H10.6b | DRIITSSLATEEELK       | 52 | 3638  | 0.71 | 0.14 | 19 |
| 10 | T05H10.6a;T05H10.6b | DRIITSSLATEEELK       | 46 | 3626  | 0.77 | 0.15 | 20 |
| 10 | T05H10.6a;T05H10.6b | DRIITSSLATEEELK       | 66 | 3188  | 0.79 | 0.14 | 18 |
| 10 | T05H10.6a;T05H10.6b | DRIITSSLATEEELK       | 27 | 2706  | 0.87 | 0.14 | 16 |
| 7  | T05H10.6a;T05H10.6b | DRIITSSLATEEELK       | 31 | 3771  | 0.88 | 0.18 | 20 |
| 22 | T05H10.6a;T05H10.6b | DRIITSSLATEEELK       | 32 | 2363  | 0.93 | 0.26 | 27 |
| 22 | T05H10.6a;T05H10.6b | DRIITSSLATEEELK       | 44 | 5779  | 0.99 | 0.15 | 15 |
| 10 | T05H10.6a;T05H10.6b | DRIITSSLATEEELK       | 16 | 3642  | 0.99 | 0.09 | 9  |
| 22 | T05H10.6a;T05H10.6b | DRIITSSLATEEELK       | 41 | 2312  | 1.00 | 0.19 | 19 |
| 22 | T05H10.6a;T05H10.6b | DRIITSSLATEEELK       | 39 | 1423  | 1.17 | 0.21 | 18 |
| 7  | T05H10.6a;T05H10.6b | DRIITSSLATEEELK       | 43 | 3359  | 1.55 | 0.11 | 7  |
| 22 | T05H10.6a;T05H10.6b | DRIITSSLATEEELK       | 31 | 4184  | 1.55 | 0.19 | 12 |
| 7  | T05H10.6a;T05H10.6b | DRIITSSLATEEELK       | 27 | 3778  | 1.64 | 0.09 | 6  |
| 1  | T05H10.6a;T05H10.6b | TRDPITGFK             | 20 | 3281  | 1.72 | 0.33 | 19 |
| 22 | T05H10.6a;T05H10.6b | DRIITSSLATEEELK       | 39 | 1939  | 1.74 | 0.15 | 9  |
| 7  | T05H10.6a;T05H10.6b | DRIITSSLATEEELK       | 25 | 1095  | 1.88 | 0.19 | 10 |
| 1  | T05H10.6a;T05H10.6b | TRDPITGFK             | 12 | 2377  | 1.96 | 0.08 | 4  |
| 1  | T05H10.6a;T05H10.6b | DRIITSSLATEEELK       | 33 | 2537  | 2.06 | 0.10 | 5  |
| 10 | T05H10.6a;T05H10.6b | DRIITSSLATEEELK       | 13 | 4241  | 2.43 | 0.18 | 7  |
| 1  | T05H4.6             | VAENSVEQFIK           | 16 | 672   | 0.50 | 0.14 | 28 |
| 1  | T05H4.6             | VAENSVEQFIK           | 23 | 712   | 0.84 | 0.15 | 18 |
| 10 | T05H4.6             | NFGAALEIVTDK          | 49 | 1061  | 0.87 | 0.12 | 14 |
| 1  | T05H4.6             | VAENSVEQFIK           | 16 | 744   | 0.97 | 0.10 | 10 |
| 10 | T05H4.6             | NFGAALEIVTDK          | 54 | 1086  | 1.00 | 0.19 | 19 |
| 1  | T05H4.6             | NFGAALEIVTDK          | 49 | 573   | 1.16 | 0.28 | 24 |
| 10 | T05H4.6             | NFGAALEIVTDK          | 42 | 928   | 1.39 | 0.16 | 12 |
| 1  | T05H4.6             | NFGAALEIVTDK          | 67 | 813   | 2.39 | 0.26 | 11 |
| 22 | T06D8.8             | LAAANGPLADDWK         | 36 | 1254  | 0.78 | 0.16 | 20 |
| 10 | T06D8.8             | LAAANGPLADDWK         | 39 | 1924  | 0.93 | 0.17 | 18 |
| 10 | T06D8.8             | LAAANGPLADDWK         | 50 | 1374  | 1.12 | 0.14 | 13 |
| 22 | T06D8.8             | LAAANGPLADDWK         | 21 | 840   | 1.15 | 0.16 | 14 |
| 7  | T06G6.9             | LSIEEAEVVLREK         | 65 | 2365  | 0.42 | 0.15 | 36 |
| 7  | T06G6.9             | LSIEEAEVVLREK         | 61 | 2418  | 0.43 | 0.06 | 14 |
| 7  | T06G6.9             | LSIEEAEVVLREK         | 37 | 1639  | 0.43 | 0.21 | 48 |
| 7  | T06G6.9             | LSIEEAEVVLREK         | 38 | 1692  | 0.49 | 0.16 | 32 |
| 7  | T06G6.9             | VVDELTNELSYIK         | 52 | 828   | 0.51 | 0.15 | 30 |
| 1  | T06G6.9             | LSIEEAEVVLREK         | 14 | 459   | 0.54 | 0.10 | 18 |
| 10 | T06G6.9             | LSIEEAEVVLREK         | 49 | 2469  | 0.62 | 0.15 | 24 |
| 10 | T06G6.9             | LSIEEAEVVLREK         | 56 | 3102  | 0.64 | 0.10 | 16 |
| 7  | T06G6.9             | VVDELTNELSYIK         | 59 | 1150  | 0.75 | 0.29 | 39 |
| 22 | T06G6.9             | YVSSMLAQK             | 12 | 1469  | 0.95 | 0.20 | 21 |
| 22 | T06G6.9             | VVDELTNELSYIK         | 70 | 1228  | 1.26 | 0.19 | 15 |
| 22 | T06G6.9             | LSIEEAEVVLREK         | 32 | 1353  | 1.34 | 0.16 | 12 |
| 1  | T06G6.9             | LSIEEAEVVLREK         | 13 | 714   | 1.75 | 0.22 | 12 |
| 1  | T06G6.9             | LSIEEAEVVLREK         | 30 | 773   | 2.18 | 0.22 | 10 |
| 22 | T07A9.7             | LLLLGAGESGK           | 53 | 2348  | 0.45 | 0.25 | 56 |
| 22 | T07A9.7             | LLLLGAGESGK           | 44 | 1593  | 0.73 | 0.24 | 33 |
| 1  | T07A9.9a;T07A9.9b   | LLTLDHAVNK            | 31 | 1872  | 0.45 | 0.07 | 16 |
| 1  | T07A9.9a;T07A9.9b   | AALLDQLEK             | 21 | 477   | 0.46 | 0.13 | 27 |
| 1  | T07A9.9a;T07A9.9b   | LLTLDHAVNK            | 28 | 1932  | 0.49 | 0.14 | 29 |
| 1  | T07A9.9a;T07A9.9b   | LALQIREK              | 11 | 684   | 0.72 | 0.36 | 50 |
| 22 | T07A9.9a;T07A9.9b   | AALLDQLEK             | 13 | 1245  | 1.12 | 0.15 | 13 |
| 10 | T07A9.9a;T07A9.9b   | VRAPFVPPGLAAK         | 12 | 1184  | 1.63 | 0.10 | 6  |
| 22 | T07C4.1             | LHADAITDFNEEFTRK      | 13 | 2373  | 0.38 | 0.18 | 49 |
| 10 | T07C4.1             | LHADAITDFNEEFTRK      | 11 | 11060 | 0.68 | 0.04 | 6  |
| 22 | T07C4.1             | FGDTGNTNLLQLTGAQK     | 58 | 1067  | 0.69 | 0.16 | 23 |
| 7  | T07C4.1             | GSLTALEGYTETAVK       | 62 | 1179  | 0.76 | 0.20 | 27 |
| 7  | T07C4.1             | GSLTALEGYTETAVK       | 64 | 1094  | 0.81 | 0.20 | 25 |
| 22 | T07C4.1             | FGDTGNTNLLQLTGAQK     | 64 | 1021  | 0.98 | 0.17 | 17 |
| 10 | T07C4.1             | LHADAITDFNEEFTRK      | 11 | 11560 | 1.24 | 0.22 | 17 |
| 22 | T07C4.1             | GSLTALEGYTETAVK       | 61 | 1548  | 1.48 | 0.15 | 10 |
| 10 | T07C4.1             | GSLTALEGYTETAVK       | 47 | 672   | 1.65 | 0.12 | 7  |
| 1  | T07C4.1             | GSLTALEGYTETAVK       | 59 | 957   | 1.77 | 0.25 | 14 |
| 10 | T07C4.1             | GSLTALEGYTETAVK       | 58 | 1045  | 1.80 | 0.13 | 7  |
| 22 | T07C4.1             | GSLTALEGYTETAVK       | 71 | 1135  | 1.83 | 0.23 | 13 |
| 1  | T07C4.1             | GSLTALEGYTETAVK       | 78 | 1107  | 1.91 | 0.18 | 9  |
| 10 | T08B1.2a;T08B1.2b   | SVAMAGIRK             | 13 | 2722  | 5.54 | 0.97 | 18 |

|                               |                       |    |        |      |      |    |
|-------------------------------|-----------------------|----|--------|------|------|----|
| 22 T08B2.7a;T08B2.7b;T08B2.7c | AFGELSQTFQSK          | 34 | 1092   | 0.52 | 0.18 | 35 |
| 22 T08B2.7a;T08B2.7b;T08B2.7c | ALGPRLGGGSADLLSELVK   | 19 | 1217   | 0.58 | 0.20 | 35 |
| 22 T08B2.7a;T08B2.7b;T08B2.7c | ALGPRLGGGSADLLSELVK   | 48 | 1953   | 0.59 | 0.18 | 30 |
| 1 T08B2.7a;T08B2.7b;T08B2.7c  | ETLATAAQLGLK          | 29 | 553    | 0.61 | 0.19 | 30 |
| 22 T08B2.7a;T08B2.7b;T08B2.7c | ALIGLFDGSTDAK         | 41 | 804    | 0.66 | 0.23 | 35 |
| 22 T08B2.7a;T08B2.7b;T08B2.7c | VIGMHYFSPVEK          | 27 | 2356   | 0.81 | 0.13 | 16 |
| 22 T08B2.7a;T08B2.7b;T08B2.7c | ALIGLFDGSTDAK         | 40 | 1046   | 0.83 | 0.16 | 20 |
| 22 T08B2.7a;T08B2.7b;T08B2.7c | AFGELSQTFQSK          | 19 | 764    | 0.85 | 0.23 | 28 |
| 22 T08B2.7a;T08B2.7b;T08B2.7c | ALIGLFDGSTDAK         | 16 | 536    | 0.87 | 0.25 | 29 |
| 22 T08B2.7a;T08B2.7b;T08B2.7c | MQLLEIITHDGTSK        | 21 | 1126   | 0.92 | 0.09 | 10 |
| 22 T08B2.7a;T08B2.7b;T08B2.7c | MQLLEIITHDGTSK        | 33 | 1020   | 1.09 | 0.14 | 13 |
| 10 T08B2.7c;T08B2.7a;T08B2.7b | ALGPRLGGGSADLLSELVK   | 19 | 827    | 0.55 | 0.19 | 35 |
| 10 T08B2.7c;T08B2.7a;T08B2.7b | ALIGLFDGSTDAK         | 32 | 702    | 1.03 | 0.24 | 23 |
| 10 T08B2.7c;T08B2.7a;T08B2.7b | ALIGLFDGSTDAK         | 50 | 868    | 1.14 | 0.14 | 12 |
| 10 T08B2.7c;T08B2.7a;T08B2.7b | AFGELSQTFQSK          | 38 | 962    | 1.16 | 0.13 | 12 |
| 10 T08B2.7c;T08B2.7a;T08B2.7b | ETLATAAQLGLK          | 10 | 739    | 1.31 | 0.24 | 19 |
| 10 T08B2.7c;T08B2.7a;T08B2.7b | GIFVYGDGK             | 30 | 1665   | 1.67 | 0.08 | 5  |
| 10 T08B2.7c;T08B2.7a;T08B2.7b | GIFVYGDGK             | 15 | 1692   | 1.71 | 0.17 | 10 |
| 10 T08B2.7c;T08B2.7a;T08B2.7b | MQLLEIITHDGTSK        | 40 | 944    | 2.07 | 0.12 | 6  |
| 10 T08B2.7c;T08B2.7a;T08B2.7b | MQLLEIITHDGTSK        | 25 | 729    | 2.34 | 0.16 | 7  |
| 22 T08B2.9a;T08B2.9b          | YGINNIRDLFGSK         | 28 | 1371   | 1.05 | 0.17 | 16 |
| 10 T08B2.9a;T08B2.9b          | YGINNIRDLFGSK         | 15 | 1058   | 1.11 | 0.12 | 11 |
| 22 T08B2.9a;T08B2.9b          | GTSFTTSLAK            | 12 | 2382   | 1.97 | 0.18 | 9  |
| 1 T08G2.3                     | AFTAFIVDGDTPGITRGK    | 25 | 714    | 0.52 | 0.11 | 21 |
| 22 T08G2.3                    | AFTAFIVDGDTPGITRGK    | 50 | 1350   | 0.72 | 0.24 | 33 |
| 10 T08G2.3                    | AWITGGGHAK            | 19 | 12089  | 0.77 | 0.12 | 16 |
| 1 T08G2.3                     | AWITGGGHAK            | 11 | 2108   | 0.80 | 0.16 | 20 |
| 1 T08G2.3                     | AFTAFIVDGDTPGITRGK    | 17 | 841    | 0.82 | 0.13 | 16 |
| 10 T08G2.3                    | AWITGGGHAK            | 15 | 6884   | 0.97 | 0.18 | 19 |
| 7 T08G2.3                     | AWITGGGHAK            | 12 | 2792   | 1.00 | 0.04 | 4  |
| 1 T08G2.3                     | AWITGGGHAK            | 17 | 6905   | 1.22 | 0.23 | 19 |
| 22 T08G2.3                    | AWITGGGHAK            | 42 | 5186   | 1.40 | 0.07 | 5  |
| 22 T08G2.3                    | AWITGGGHAK            | 39 | 8038   | 1.50 | 0.11 | 8  |
| 10 T08H10.1                   | AARPDGVWPEGDPILLEPIVK | 30 | 7343   | 0.41 | 0.14 | 33 |
| 10 T08H10.1                   | REDIFVTSK             | 21 | 6409   | 0.47 | 0.27 | 59 |
| 7 T08H10.1                    | AARPDGVWPEGDPILLEPIVK | 19 | 4918   | 0.53 | 0.16 | 31 |
| 10 T08H10.1                   | AARPDGVWPEGDPILLEPIVK | 23 | 3130   | 0.54 | 0.23 | 43 |
| 10 T08H10.1                   | REDIFVTSK             | 20 | 3398   | 0.55 | 0.16 | 30 |
| 10 T08H10.1                   | VLHEYISSGK            | 38 | 26979  | 0.56 | 0.08 | 14 |
| 22 T08H10.1                   | VLHEYISSGK            | 14 | 5429   | 0.58 | 0.17 | 29 |
| 10 T08H10.1                   | AARPDGVWPEGDPILLEPIVK | 35 | 6586   | 0.59 | 0.22 | 37 |
| 7 T08H10.1                    | AARPDGVWPEGDPILLEPIVK | 34 | 7074   | 0.62 | 0.21 | 33 |
| 10 T08H10.1                   | LPFTAHAPEDEVPK        | 31 | 42325  | 0.62 | 0.08 | 14 |
| 10 T08H10.1                   | SVSPDRIVENISTFDFK     | 19 | 2550   | 0.64 | 0.17 | 27 |
| 22 T08H10.1                   | VLHEYISSGK            | 55 | 61803  | 0.66 | 0.09 | 13 |
| 1 T08H10.1                    | SVSPDRIVENISTFDFK     | 11 | 224    | 0.68 | 0.16 | 23 |
| 10 T08H10.1                   | AARPDGVWPEGDPILLEPIVK | 18 | 3009   | 0.70 | 0.24 | 35 |
| 22 T08H10.1                   | VLHEYISSGK            | 13 | 5917   | 0.70 | 0.21 | 30 |
| 7 T08H10.1                    | HPFFPHDDIDTSK         | 20 | 9656   | 0.70 | 0.36 | 52 |
| 1 T08H10.1                    | LPFTAHAPEDEVPK        | 26 | 3004   | 0.71 | 0.06 | 9  |
| 22 T08H10.1                   | SVSPDRIVENISTFDFK     | 18 | 1317   | 0.71 | 0.23 | 33 |
| 10 T08H10.1                   | LPFTAHAPEDEVPK        | 40 | 7349   | 0.72 | 0.13 | 19 |
| 22 T08H10.1                   | AARPDGVWPEGDPILLEPIVK | 33 | 6237   | 0.74 | 0.28 | 38 |
| 7 T08H10.1                    | SVSPDRIVENISTFDFK     | 11 | 1580   | 0.78 | 0.22 | 28 |
| 22 T08H10.1                   | AARPDGVWPEGDPILLEPIVK | 16 | 3136   | 0.78 | 0.14 | 18 |
| 10 T08H10.1                   | LPFTAHAPEDEVPK        | 53 | 6677   | 0.79 | 0.12 | 15 |
| 22 T08H10.1                   | LPFTAHAPEDEVPK        | 44 | 7517   | 0.79 | 0.11 | 14 |
| 22 T08H10.1                   | VLHEYISSGK            | 57 | 75145  | 0.79 | 0.11 | 14 |
| 22 T08H10.1                   | LPFTAHAPEDEVPK        | 66 | 56826  | 0.81 | 0.13 | 16 |
| 22 T08H10.1                   | LPFTAHAPEDEVPK        | 44 | 6600   | 0.82 | 0.08 | 10 |
| 22 T08H10.1                   | SVSPDRIVENISTFDFK     | 24 | 5101   | 0.83 | 0.13 | 16 |
| 22 T08H10.1                   | SVSPDRIVENISTFDFK     | 24 | 7303   | 0.86 | 0.14 | 16 |
| 22 T08H10.1                   | SVSPDRIVENISTFDFK     | 11 | 1115   | 0.88 | 0.19 | 21 |
| 22 T08H10.1                   | LPFTAHAPEDEVPK        | 33 | 5348   | 0.88 | 0.12 | 13 |
| 22 T08H10.1                   | SVSPDRIVENISTFDFK     | 27 | 3121   | 0.92 | 0.11 | 12 |
| 10 T08H10.1                   | LPFTAHAPEDEVPK        | 18 | 5141   | 0.94 | 0.11 | 12 |
| 1 T08H10.1                    | LPFTAHAPEDEVPK        | 24 | 1878   | 0.96 | 0.11 | 12 |
| 22 T08H10.1                   | REDIFVTSK             | 42 | 6130   | 0.97 | 0.14 | 15 |
| 22 T08H10.1                   | SVSPDRIVENISTFDFK     | 18 | 950    | 0.97 | 0.20 | 21 |
| 7 T08H10.1                    | SVSPDRIVENISTFDFK     | 15 | 4436   | 0.98 | 0.09 | 9  |
| 22 T08H10.1                   | LPFTAHAPEDEVPK        | 65 | 55162  | 1.00 | 0.08 | 8  |
| 7 T08H10.1                    | LPFTAHAPEDEVPK        | 30 | 3862   | 1.03 | 0.09 | 9  |
| 1 T08H10.1                    | LPFTAHAPEDEVPK        | 13 | 1316   | 1.06 | 0.11 | 10 |
| 7 T08H10.1                    | LPFTAHAPEDEVPK        | 47 | 2662   | 1.08 | 0.08 | 8  |
| 7 T08H10.1                    | SVSPDRIVENISTFDFK     | 37 | 3801   | 1.13 | 0.20 | 18 |
| 7 T08H10.1                    | VLHEYISSGK            | 17 | 936    | 1.22 | 0.24 | 19 |
| 7 T08H10.1                    | SVSPDRIVENISTFDFK     | 11 | 2758   | 1.22 | 0.10 | 8  |
| 10 T08H10.1                   | LPFTAHAPEDEVPK        | 51 | 7745   | 1.23 | 0.08 | 7  |
| 7 T08H10.1                    | HPFFPHDDIDTSK         | 38 | 19395  | 1.24 | 0.11 | 9  |
| 22 T08H10.1                   | LPFTAHAPEDEVPK        | 40 | 4172   | 1.24 | 0.13 | 11 |
| 1 T08H10.1                    | LPFTAHAPEDEVPK        | 31 | 1973   | 1.24 | 0.12 | 10 |
| 22 T08H10.1                   | REDIFVTSK             | 19 | 4073   | 1.26 | 0.07 | 6  |
| 10 T08H10.1                   | LPFTAHAPEDEVPK        | 41 | 11292  | 1.30 | 0.13 | 10 |
| 7 T08H10.1                    | HPFFPHDDIDTSK         | 14 | 18255  | 1.31 | 0.07 | 5  |
| 22 T08H10.1                   | SVSPDRIVENISTFDFK     | 11 | 2477   | 1.32 | 0.25 | 19 |
| 22 T08H10.1                   | LPFTAHAPEDEVPK        | 45 | 13412  | 1.33 | 0.13 | 10 |
| 10 T08H10.1                   | LPFTAHAPEDEVPK        | 28 | 7558   | 1.35 | 0.07 | 5  |
| 7 T08H10.1                    | LPFTAHAPEDEVPK        | 16 | 4327   | 1.35 | 0.13 | 10 |
| 22 T08H10.1                   | HPFFPHDDIDTSK         | 15 | 10058  | 1.38 | 0.11 | 8  |
| 7 T08H10.1                    | LPFTAHAPEDEVPK        | 40 | 8122   | 1.41 | 0.10 | 7  |
| 7 T08H10.1                    | VLHEYISSGK            | 14 | 7744   | 1.42 | 0.12 | 8  |
| 1 T08H10.1                    | HPFFPHDDIDTSK         | 17 | 6894   | 1.43 | 0.34 | 24 |
| 22 T08H10.1                   | HPFFPHDDIDTSK         | 30 | 76493  | 1.44 | 0.11 | 8  |
| 10 T08H10.1                   | HPFFPHDDIDTSK         | 63 | 9856   | 1.47 | 0.08 | 5  |
| 10 T08H10.1                   | HPFFPHDDIDTSK         | 65 | 9277   | 1.50 | 0.06 | 4  |
| 10 T08H10.1                   | HPFFPHDDIDTSK         | 35 | 171966 | 1.51 | 0.17 | 11 |
| 22 T08H10.1                   | TAAQLIRHLTQHGISIPK    | 12 | 2616   | 1.52 | 0.20 | 13 |
| 7 T08H10.1                    | LPFTAHAPEDEVPK        | 23 | 4457   | 1.58 | 0.09 | 6  |
| 10 T08H10.1                   | LPFTAHAPEDEVPK        | 21 | 4839   | 1.63 | 0.13 | 8  |
| 10 T08H10.1                   | VLHEYISSGK            | 40 | 4914   | 1.77 | 0.09 | 5  |
| 10 T08H10.1                   | VLHEYISSGK            | 52 | 8288   | 1.77 | 0.06 | 4  |

|                    |                       |     |        |      |      |    |
|--------------------|-----------------------|-----|--------|------|------|----|
| 7 T08H10.1         | HPFFPHDDIDTSK         | 19  | 96759  | 1.78 | 0.35 | 20 |
| 7 T08H10.1         | VLHEYISSGK            | 12  | 11028  | 1.82 | 0.08 | 4  |
| 22 T08H10.1        | HPFFPHDDIDTSK         | 23  | 98998  | 1.83 | 0.05 | 3  |
| 7 T08H10.1         | LPFTAHAPEDVPK         | 36  | 4445   | 1.85 | 0.12 | 6  |
| 7 T08H10.1         | HPFFPHDDIDTSK         | 72  | 5054   | 1.86 | 0.16 | 9  |
| 22 T08H10.1        | LPFTAHAPEDVPK         | 23  | 2865   | 1.92 | 0.17 | 9  |
| 22 T08H10.1        | HPFFPHDDIDTSK         | 26  | 14268  | 2.04 | 0.08 | 4  |
| 22 T08H10.1        | LPFTAHAPEDVPK         | 33  | 3493   | 2.06 | 0.16 | 8  |
| 10 T08H10.1        | HPFFPHDDIDTSK         | 49  | 8232   | 2.14 | 0.09 | 4  |
| 22 T08H10.1        | VLHEYISSGK            | 31  | 4415   | 2.16 | 0.10 | 5  |
| 22 T08H10.1        | HPFFPHDDIDTSK         | 65  | 8259   | 2.24 | 0.13 | 6  |
| 22 T08H10.1        | VLHEYISSGK            | 43  | 8323   | 2.32 | 0.09 | 4  |
| 10 T08H10.1        | HPFFPHDDIDTSK         | 19  | 10756  | 2.40 | 0.05 | 2  |
| 7 T08H10.1         | HPFFPHDDIDTSK         | 34  | 5110   | 2.55 | 0.14 | 6  |
| 7 T08H10.1         | HPFFPHDDIDTSK         | 14  | 6925   | 2.79 | 0.11 | 4  |
| 10 T08H10.1        | LPFTAHAPEDVPK         | 37  | 3829   | 2.84 | 0.12 | 4  |
| 10 T08H10.1        | LPFTAHAPEDVPK         | 29  | 5007   | 3.03 | 0.11 | 4  |
| 10 T08H10.1        | VLHEYISSGK            | 25  | 5190   | 3.21 | 0.14 | 4  |
| 10 T08H10.1        | VLHEYISSGK            | 20  | 3698   | 3.51 | 0.10 | 3  |
| 22 T09A5.9         | IENLEALTQLK           | 51  | 1389   | 0.44 | 0.21 | 47 |
| 22 T09A5.9         | IENLEALTQLK           | 30  | 1186   | 0.46 | 0.18 | 40 |
| 22 T09A5.9         | LETLYLVSNK            | 24  | 1677   | 0.46 | 0.23 | 50 |
| 22 T09A5.9         | LSVLSLPGNRIVK         | 17  | 3214   | 0.55 | 0.11 | 19 |
| 22 T09A5.9         | LSVLSLPGNRIVK         | 19  | 2743   | 0.58 | 0.23 | 41 |
| 22 T09A5.9         | IENLEALTQLK           | 38  | 1122   | 0.65 | 0.12 | 18 |
| 7 T09A5.9          | IENLEALTQLK           | 51  | 1027   | 0.75 | 0.16 | 21 |
| 10 T09A5.9         | IENLEALTQLK           | 49  | 1174   | 0.84 | 0.13 | 15 |
| 10 T09A5.9         | IENLEALTQLK           | 48  | 1391   | 0.85 | 0.18 | 21 |
| 22 T09A5.9         | IRQLEGVETLQK          | 11  | 2224   | 0.87 | 0.25 | 28 |
| 22 T09A5.9         | IRQLEGVETLQK          | 21  | 2207   | 1.08 | 0.14 | 13 |
| 10 T09A5.9         | IRQLEGVETLQK          | 12  | 2230   | 1.09 | 0.10 | 9  |
| 22 T09A5.9         | LSVLSLPGNRIVK         | 20  | 2283   | 1.35 | 0.21 | 16 |
| 22 T09A5.9         | LSVLSLPGNRIVK         | 11  | 1915   | 1.48 | 0.23 | 15 |
| 7 T09B4.8          | AVLEVIEEEK            | 19  | 868    | 0.39 | 0.21 | 54 |
| 7 T09B4.8          | AVLEVIEEEK            | 33  | 1066   | 0.43 | 0.12 | 29 |
| 7 T09B4.8          | AVLEVIEEEK            | 68  | 2376   | 0.44 | 0.12 | 27 |
| 10 T09B4.8         | SLYFNTYGGNPLASVVGK    | 23  | 827    | 0.44 | 0.22 | 49 |
| 10 T09B4.8         | AVLEVIEEEK            | 36  | 3729   | 0.45 | 0.11 | 24 |
| 7 T09B4.8          | TAAIFEDTK             | 17  | 1287   | 0.48 | 0.19 | 41 |
| 1 T09B4.8          | AVLEVIEEEK            | 16  | 449    | 0.48 | 0.14 | 29 |
| 7 T09B4.8          | TAAIFEDTK             | 13  | 2053   | 0.49 | 0.22 | 45 |
| 10 T09B4.8         | SLYFNTYGGNPLASVVGK    | 70  | 1368   | 0.52 | 0.23 | 44 |
| 7 T09B4.8          | AVLEVIEEEK            | 58  | 1541   | 0.55 | 0.15 | 28 |
| 22 T09B4.8         | LWHTTSIYHTEPIEYAEK    | 31  | 3413   | 0.56 | 0.10 | 18 |
| 7 T09B4.8          | TAAIFEDTK             | 11  | 1432   | 0.58 | 0.06 | 10 |
| 7 T09B4.8          | TAAIFEDTK             | 27  | 2695   | 0.62 | 0.13 | 20 |
| 22 T09B4.8         | SLYFNTYGGNPLASVVGK    | 90  | 1517   | 0.63 | 0.12 | 19 |
| 22 T09B4.8         | SLYFNTYGGNPLASVVGK    | 64  | 1234   | 0.68 | 0.22 | 32 |
| 10 T09B4.8         | SLYFNTYGGNPLASVVGK    | 108 | 1018   | 0.69 | 0.21 | 30 |
| 22 T09B4.8         | SLYFNTYGGNPLASVVGK    | 72  | 1325   | 0.69 | 0.16 | 23 |
| 22 T09B4.8         | GIGNGFPLGAVVTSK       | 26  | 1352   | 0.69 | 0.18 | 26 |
| 22 T09B4.8         | QLAAIDDATIGDVRGK      | 10  | 3253   | 0.69 | 0.20 | 29 |
| 10 T09B4.8         | LQENSASVVG DYFLK      | 64  | 2684   | 0.71 | 0.23 | 32 |
| 22 T09B4.8         | LQENSASVVG DYFLK      | 29  | 2064   | 0.71 | 0.29 | 41 |
| 10 T09B4.8         | LQENSASVVG DYFLK      | 30  | 1487   | 0.71 | 0.30 | 42 |
| 7 T09B4.8          | QLAAIDDATIGDVRGK      | 73  | 5304   | 0.73 | 0.11 | 16 |
| 22 T09B4.8         | QLAAIDDATIGDVRGK      | 82  | 5500   | 0.74 | 0.11 | 15 |
| 7 T09B4.8          | GIGNGFPLGAVVTSK       | 27  | 1681   | 0.75 | 0.14 | 19 |
| 22 T09B4.8         | GIGNGFPLGAVVTSK       | 16  | 1250   | 0.86 | 0.19 | 22 |
| 10 T09B4.8         | LQENSASVVG DYFLK      | 67  | 2703   | 0.87 | 0.19 | 22 |
| 7 T09B4.8          | GIGNGFPLGAVVTSK       | 55  | 2769   | 0.90 | 0.14 | 16 |
| 10 T09B4.8         | QFLFDSNGK             | 29  | 2512   | 0.92 | 0.07 | 8  |
| 7 T09B4.8          | GIGNGFPLGAVVTSK       | 57  | 1855   | 0.92 | 0.13 | 14 |
| 22 T09B4.8         | QLAAIDDATIGDVRGK      | 72  | 4373   | 0.92 | 0.12 | 13 |
| 10 T09B4.8         | SLYFNTYGGNPLASVVGK    | 12  | 658    | 0.95 | 0.06 | 6  |
| 1 T09B4.8          | GIGNGFPLGAVVTSK       | 82  | 2252   | 0.97 | 0.20 | 20 |
| 10 T09B4.8         | QLAAIDDATIGDVRGK      | 108 | 7773   | 1.02 | 0.09 | 9  |
| 10 T09B4.8         | QLAAIDDATIGDVRGK      | 93  | 8568   | 1.05 | 0.14 | 13 |
| 7 T09B4.8          | GIGNGFPLGAVVTSK       | 57  | 2336   | 1.06 | 0.10 | 10 |
| 1 T09B4.8          | LQENSASVVG DYFLK      | 46  | 1074   | 1.09 | 0.14 | 13 |
| 10 T09B4.8         | GIGNGFPLGAVVTSK       | 26  | 901    | 1.10 | 0.19 | 18 |
| 22 T09B4.8         | SLYFNTYGGNPLASVVGK    | 11  | 595    | 1.18 | 0.06 | 5  |
| 10 T09B4.8         | QFLFDSNGK             | 28  | 2397   | 1.19 | 0.14 | 12 |
| 1 T09B4.8          | GIGNGFPLGAVVTSK       | 45  | 1142   | 1.24 | 0.19 | 16 |
| 10 T09B4.8         | GIGNGFPLGAVVTSK       | 71  | 4734   | 1.25 | 0.14 | 11 |
| 10 T09B4.8         | GIGNGFPLGAVVTSK       | 46  | 1412   | 1.29 | 0.19 | 15 |
| 1 T09B4.8          | GIGNGFPLGAVVTSK       | 20  | 707    | 1.29 | 0.25 | 20 |
| 1 T09B4.8          | QLAAIDDATIGDVRGK      | 28  | 1633   | 1.36 | 0.04 | 3  |
| 22 T09B4.8         | LQENSASVVG DYFLK      | 30  | 1865   | 1.47 | 0.21 | 15 |
| 1 T09B4.8          | GIGNGFPLGAVVTSK       | 62  | 1802   | 1.48 | 0.10 | 6  |
| 1 T09B4.8          | NQGLLIGK              | 33  | 3115   | 1.50 | 0.18 | 12 |
| 7 T09B4.8          | GHVTTYK               | 12  | 4639   | 1.54 | 0.04 | 3  |
| 10 T09B4.8         | GIGNGFPLGAVVTSK       | 65  | 3188   | 1.57 | 0.14 | 9  |
| 1 T09B4.8          | GHVTTYK               | 12  | 9341   | 1.65 | 0.10 | 6  |
| 1 T09B4.8          | QLAAIDDATIGDVRGK      | 57  | 1727   | 1.67 | 0.14 | 9  |
| 1 T09B4.8          | NQGLLIGK              | 20  | 1882   | 1.69 | 0.10 | 6  |
| 1 T09B4.8          | GHVTTYK               | 13  | 11949  | 1.77 | 0.18 | 10 |
| 7 T09F3.3;F33H1.2  | ADFVVESTGVFTTK        | 52  | 1811   | 0.28 | 0.18 | 64 |
| 7 T09F3.3;F33H1.2  | VIPELNGK              | 18  | 83760  | 0.34 | 0.17 | 50 |
| 7 T09F3.3;F33H1.2  | VIPELNGK              | 31  | 124914 | 0.34 | 0.08 | 25 |
| 22 T09F3.3;F33H1.2 | ADFVVESTGVFTTK        | 56  | 1473   | 0.39 | 0.32 | 83 |
| 22 T09F3.3;F33H1.2 | VIPELNGK              | 36  | 192120 | 0.39 | 0.13 | 34 |
| 10 T09F3.3;F33H1.2 | YDSTHGQFK             | 26  | 5540   | 0.40 | 0.08 | 20 |
| 10 T09F3.3;F33H1.2 | VIPELNGK              | 31  | 112819 | 0.44 | 0.05 | 12 |
| 10 T09F3.3;F33H1.2 | VIPELNGK              | 32  | 150199 | 0.47 | 0.13 | 27 |
| 22 T09F3.3;F33H1.2 | VIPELNGK              | 33  | 165884 | 0.52 | 0.10 | 20 |
| 10 T09F3.3;F33H1.2 | YDSTHGQFK             | 26  | 7600   | 0.52 | 0.07 | 14 |
| 22 T09F3.3;F33H1.2 | LWRDGRGAGQNIIPASTGAAK | 27  | 11982  | 0.56 | 0.12 | 21 |
| 22 T09F3.3;F33H1.2 | LWRDGRGAGQNIIPASTGAAK | 16  | 1918   | 0.59 | 0.07 | 13 |
| 22 T09F3.3;F33H1.2 | LWRDGRGAGQNIIPASTGAAK | 20  | 2150   | 0.59 | 0.11 | 19 |
| 7 T09F3.3;F33H1.2  | VIPELNGK              | 27  | 106535 | 0.60 | 0.10 | 17 |

|                      |                         |    |        |      |      |    |
|----------------------|-------------------------|----|--------|------|------|----|
| 22 T09F3.3;F33H1.2   | ADFVVESTGVFTTK          | 43 | 1143   | 0.61 | 0.12 | 20 |
| 22 T09F3.3;F33H1.2   | LWRDGRGAGQNIIPASTGAAK   | 22 | 293850 | 0.64 | 0.12 | 19 |
| 22 T09F3.3;F33H1.2   | VIPELNGK                | 26 | 238333 | 0.65 | 0.03 | 4  |
| 10 T09F3.3;F33H1.2   | VIISAPSadAPMYVVGvNHEK   | 13 | 5525   | 0.71 | 0.12 | 17 |
| 7 T09F3.3;F33H1.2    | VIPELNGK                | 27 | 130546 | 0.72 | 0.09 | 12 |
| 22 T09F3.3;F33H1.2   | LWRDGRGAGQNIIPASTGAAK   | 21 | 12823  | 0.72 | 0.12 | 17 |
| 22 T09F3.3;F33H1.2   | YDSTHGQFK               | 46 | 42740  | 0.72 | 0.11 | 15 |
| 22 T09F3.3;F33H1.2   | LWRDGRGAGQNIIPASTGAAK   | 19 | 5958   | 0.75 | 0.10 | 14 |
| 22 T09F3.3;F33H1.2   | YDSTHGQFK               | 46 | 45462  | 0.75 | 0.08 | 10 |
| 10 T09F3.3;F33H1.2   | LWRDGRGAGQNIIPASTGAAK   | 13 | 332079 | 0.76 | 0.17 | 22 |
| 22 T09F3.3;F33H1.2   | GTvTYDGDfLIVQK          | 21 | 933    | 0.77 | 0.15 | 20 |
| 22 T09F3.3;F33H1.2   | VIPELNGK                | 34 | 262162 | 0.78 | 0.08 | 11 |
| 10 T09F3.3;F33H1.2   | LWRDGRGAGQNIIPASTGAAK   | 37 | 250322 | 0.78 | 0.17 | 22 |
| 22 T09F3.3;F33H1.2   | LWRDGRGAGQNIIPASTGAAK   | 38 | 269772 | 0.78 | 0.16 | 20 |
| 10 T09F3.3;F33H1.2   | VIPELNGK                | 39 | 220333 | 0.79 | 0.04 | 5  |
| 10 T09F3.3;F33H1.2   | YDSTHGQFK               | 47 | 12867  | 0.82 | 0.07 | 9  |
| 10 T09F3.3;F33H1.2   | VIPELNGK                | 32 | 188107 | 0.83 | 0.06 | 7  |
| 7 T09F3.3;F33H1.2    | ADFVVESTGVFTTK          | 78 | 2537   | 0.88 | 0.12 | 13 |
| 10 T09F3.3;F33H1.2   | YDSTHGQFK               | 45 | 9278   | 0.90 | 0.09 | 10 |
| 7 T09F3.3;F33H1.2    | YDSTHGQFK               | 39 | 7659   | 0.90 | 0.07 | 8  |
| 22 T09F3.3;F33H1.2   | LWRDGRGAGQNIIPASTGAAK   | 10 | 18444  | 0.93 | 0.09 | 9  |
| 7 T09F3.3;F33H1.2    | GTvTYDGDfLIVQK          | 65 | 3202   | 0.94 | 0.07 | 8  |
| 7 T09F3.3;F33H1.2    | YDSTHGQFK               | 36 | 8347   | 0.95 | 0.10 | 11 |
| 22 T09F3.3;F33H1.2   | GTvTYDGDfLIVQK          | 41 | 1215   | 0.95 | 0.18 | 19 |
| 7 T09F3.3;F33H1.2    | DPAAIAWGSVK             | 18 | 2609   | 0.99 | 0.10 | 10 |
| 22 T09F3.3;F33H1.2   | GTvTYDGDfLIVQK          | 48 | 1068   | 1.00 | 0.13 | 13 |
| 22 T09F3.3;F33H1.2   | LWRDGRGAGQNIIPASTGAAK   | 12 | 6263   | 1.02 | 0.15 | 15 |
| 7 T09F3.3;F33H1.2    | GTvTYDGDfLIVQK          | 61 | 1861   | 1.03 | 0.11 | 11 |
| 7 T09F3.3;F33H1.2    | DPAAIAWGSVK             | 75 | 16799  | 1.06 | 0.09 | 8  |
| 22 T09F3.3;F33H1.2   | GTvTYDGDfLIVQK          | 52 | 1579   | 1.07 | 0.14 | 13 |
| 22 T09F3.3;F33H1.2   | GTvTYDGDfLIVQK          | 59 | 1945   | 1.08 | 0.14 | 13 |
| 7 T09F3.3;F33H1.2    | VINDNFGIeGLMTTVHAvTATQK | 61 | 5898   | 1.10 | 0.16 | 15 |
| 7 T09F3.3;F33H1.2    | LWRDGRGAGQNIIPASTGAAK   | 11 | 15692  | 1.10 | 0.16 | 15 |
| 7 T09F3.3;F33H1.2    | VINDNFGIeGLMTTVHAvTATQK | 33 | 5704   | 1.12 | 0.19 | 17 |
| 22 T09F3.3;F33H1.2   | LWRDGRGAGQNIIPASTGAAK   | 24 | 24803  | 1.12 | 0.13 | 12 |
| 22 T09F3.3;F33H1.2   | DPAAIAWGSVK             | 95 | 45979  | 1.13 | 0.08 | 7  |
| 7 T09F3.3;F33H1.2    | LWRDGRGAGQNIIPASTGAAK   | 18 | 8014   | 1.15 | 0.12 | 10 |
| 22 T09F3.3;F33H1.2   | DPAAIAWGSVK             | 96 | 43412  | 1.20 | 0.07 | 6  |
| 22 T09F3.3;F33H1.2   | ADFVVESTGVFTTK          | 59 | 1932   | 1.24 | 0.14 | 11 |
| 22 T09F3.3;F33H1.2   | GTvTYDGDfLIVQK          | 53 | 1951   | 1.29 | 0.11 | 9  |
| 22 T09F3.3;F33H1.2   | ADFVVESTGVFTTK          | 41 | 1400   | 1.48 | 0.07 | 5  |
| 1 T09F3.3;F33H1.2    | LWRDGRGAGQNIIPASTGAAK   | 14 | 2551   | 1.55 | 0.17 | 11 |
| 22 T09F3.3;F33H1.2   | YDSTHGQFK               | 39 | 11693  | 1.56 | 0.06 | 4  |
| 22 T09F3.3;F33H1.2   | YDSTHGQFK               | 41 | 8100   | 1.67 | 0.08 | 5  |
| 10 T09F3.3;F33H1.2   | LWRDGRGAGQNIIPASTGAAK   | 21 | 19299  | 1.68 | 0.12 | 7  |
| 10 T09F3.3;F33H1.2   | LWRDGRGAGQNIIPASTGAAK   | 12 | 11336  | 1.69 | 0.21 | 12 |
| 7 T09F3.3;F33H1.2    | VINDNFGIeGLMTTVHAvTATQK | 31 | 2341   | 1.81 | 0.12 | 7  |
| 7 T09F3.3;F33H1.2    | VINDNFGIeGLMTTVHAvTATQK | 37 | 1312   | 1.87 | 0.21 | 11 |
| 22 T10B5.5a;T10B5.5b | INGETELREMLVK           | 20 | 1765   | 0.57 | 0.16 | 29 |
| 22 T10B5.5a;T10B5.5b | AFSYAGFEMQPK            | 40 | 1855   | 0.62 | 0.18 | 28 |
| 22 T10B5.5a;T10B5.5b | AFSYAGFEMQPK            | 35 | 2159   | 0.69 | 0.08 | 12 |
| 22 T10B5.5a;T10B5.5b | INGETELREMLVK           | 13 | 1937   | 0.70 | 0.22 | 31 |
| 10 T10B5.5a;T10B5.5b | IHDsgANvVLSK            | 45 | 5450   | 0.90 | 0.13 | 14 |
| 10 T10B5.5a;T10B5.5b | INGETELREMLVK           | 13 | 2132   | 0.91 | 0.22 | 25 |
| 22 T10B5.5a;T10B5.5b | IHDsgANvVLSK            | 34 | 3020   | 0.92 | 0.17 | 18 |
| 22 T10B5.5a;T10B5.5b | AFSYAGFEMQPK            | 11 | 1709   | 0.94 | 0.15 | 16 |
| 10 T10B5.5a;T10B5.5b | IHDsgANvVLSK            | 42 | 5744   | 0.94 | 0.07 | 8  |
| 10 T10B5.5a;T10B5.5b | AFSYAGFEMQPK            | 10 | 1846   | 0.95 | 0.22 | 23 |
| 10 T10B5.5a;T10B5.5b | IHDsgANvVLSK            | 32 | 4446   | 0.96 | 0.08 | 8  |
| 22 T10B5.5a;T10B5.5b | GATTISNDGATILK          | 15 | 652    | 1.04 | 0.17 | 16 |
| 22 T10B5.5a;T10B5.5b | IHDsgANvVLSK            | 41 | 2804   | 1.05 | 0.23 | 21 |
| 1 T10B5.5a;T10B5.5b  | GATTISNDGATILK          | 48 | 1033   | 1.09 | 0.15 | 13 |
| 10 T10B5.5a;T10B5.5b | IHDsgANvVLSK            | 43 | 5604   | 1.11 | 0.11 | 10 |
| 10 T10B5.5a;T10B5.5b | IHDsgANvVLSK            | 37 | 4088   | 1.17 | 0.08 | 7  |
| 1 T10B5.5a;T10B5.5b  | GATTISNDGATILK          | 17 | 687    | 1.21 | 0.15 | 13 |
| 7 T10B5.5a;T10B5.5b  | IHDsgANvVLSK            | 45 | 10860  | 1.27 | 0.14 | 11 |
| 10 T10B5.5a;T10B5.5b | IHDsgANvVLSK            | 36 | 3448   | 1.27 | 0.10 | 7  |
| 10 T10B5.5a;T10B5.5b | IHDsgANvVLSK            | 19 | 2955   | 1.28 | 0.18 | 14 |
| 1 T10B5.5a;T10B5.5b  | GATTISNDGATILK          | 56 | 1885   | 1.28 | 0.20 | 16 |
| 22 T10B5.5a;T10B5.5b | IHDsgANvVLSK            | 47 | 14842  | 1.29 | 0.08 | 7  |
| 22 T10B5.5a;T10B5.5b | IHDsgANvVLSK            | 25 | 19235  | 1.32 | 0.07 | 6  |
| 22 T10B5.5a;T10B5.5b | GATTISNDGATILK          | 52 | 6198   | 1.37 | 0.19 | 14 |
| 7 T10B5.5a;T10B5.5b  | GATTISNDGATILK          | 28 | 3059   | 1.39 | 0.17 | 12 |
| 10 T10B5.5a;T10B5.5b | GATTISNDGATILK          | 16 | 1832   | 1.40 | 0.23 | 16 |
| 10 T10B5.5a;T10B5.5b | GATTISNDGATILK          | 63 | 6840   | 1.43 | 0.11 | 8  |
| 7 T10B5.5a;T10B5.5b  | IHDsgANvVLSK            | 40 | 10882  | 1.46 | 0.14 | 9  |
| 1 T10B5.5a;T10B5.5b  | IHDsgANvVLSK            | 35 | 8322   | 1.49 | 0.07 | 5  |
| 22 T10B5.5a;T10B5.5b | IHDsgANvVLSK            | 20 | 2582   | 1.59 | 0.12 | 8  |
| 7 T10B5.5a;T10B5.5b  | IHDsgANvVLSK            | 32 | 11849  | 1.91 | 0.09 | 5  |
| 7 T10B5.5a;T10B5.5b  | GATTISNDGATILK          | 46 | 2216   | 1.94 | 0.20 | 11 |
| 1 T10B5.5a;T10B5.5b  | IHDsgANvVLSK            | 34 | 6483   | 2.06 | 0.11 | 6  |
| 10 T10B5.5a;T10B5.5b | IHDsgANvVLSK            | 28 | 12391  | 2.29 | 0.04 | 2  |
| 10 T10B5.5a;T10B5.5b | IHDsgANvVLSK            | 23 | 13875  | 2.36 | 0.06 | 3  |
| 7 T10B9.10           | SLMFRNPMLDK             | 16 | 1262   | 0.31 | 0.16 | 50 |
| 7 T10B9.10           | SLMFRNPMLDK             | 11 | 1022   | 0.59 | 0.30 | 51 |
| 1 T10E9.7a;T10E9.7b  | RVVYEPsELAQEFrK         | 24 | 2198   | 1.06 | 0.16 | 15 |
| 22 T10E9.7a;T10E9.7b | RVVYEPsELAQEFrK         | 16 | 1738   | 1.23 | 0.22 | 18 |
| 22 T10F2.1a          | DMHEVITrFNfK            | 13 | 4485   | 0.56 | 0.09 | 15 |
| 22 T10F2.1a          | AFLRPETAQGIFvNFk        | 10 | 1709   | 0.61 | 0.15 | 24 |
| 7 T10F2.1a           | RLLEDTEIALAPK           | 57 | 4030   | 0.72 | 0.09 | 13 |
| 1 T10F2.1a           | RLLEDTEIALAPK           | 42 | 1324   | 0.74 | 0.10 | 14 |
| 7 T10F2.1a           | RLLEDTEIALAPK           | 77 | 4039   | 0.75 | 0.10 | 13 |
| 22 T10F2.1a          | RLLEDTEIALAPK           | 11 | 2932   | 0.79 | 0.14 | 18 |
| 22 T10F2.1a          | RLLEDTEIALAPK           | 67 | 4405   | 0.82 | 0.11 | 14 |
| 7 T10F2.1a           | RLLEDTEIALAPK           | 43 | 1837   | 0.82 | 0.15 | 19 |
| 7 T10F2.1a           | RLLEDTEIALAPK           | 29 | 2137   | 0.84 | 0.15 | 18 |
| 22 T10F2.1a          | RLLEDTEIALAPK           | 15 | 3163   | 0.84 | 0.14 | 17 |
| 22 T10F2.1a          | RLLEDTEIALAPK           | 59 | 3677   | 0.85 | 0.13 | 15 |
| 22 T10F2.1a          | RLLEDTEIALAPK           | 32 | 2089   | 0.85 | 0.23 | 28 |
| 22 T10F2.1a          | AFLRPETAQGIFvNFk        | 19 | 2276   | 0.85 | 0.17 | 20 |
| 22 T10F2.1a          | RLLEDTEIALAPK           | 12 | 3403   | 0.90 | 0.21 | 23 |

|                      |                       |    |      |      |      |     |
|----------------------|-----------------------|----|------|------|------|-----|
| 22 T10F2.1a          | RLLEDTEIALAPK         | 79 | 4495 | 0.91 | 0.10 | 11  |
| 22 T10F2.1a          | ANMLQEWRK             | 19 | 858  | 0.92 | 0.33 | 36  |
| 22 T10F2.1a          | RLLEDTEIALAPK         | 40 | 1860 | 0.93 | 0.13 | 14  |
| 22 T10F2.1a          | EASFDRLK              | 13 | 5523 | 0.95 | 0.10 | 11  |
| 22 T10F2.1a          | LAPLRAAVK             | 12 | 5408 | 1.03 | 0.26 | 25  |
| 1 T10F2.1a           | RLLEDTEIALAPK         | 19 | 1456 | 1.03 | 0.07 | 7   |
| 22 T10F2.1a          | LYNLSVDGQNYALTPEHLNIK | 23 | 1755 | 1.03 | 0.25 | 24  |
| 7 T10F2.1a           | RLLEDTEIALAPK         | 21 | 1909 | 1.03 | 0.13 | 12  |
| 22 T10F2.1a          | RLLEDTEIALAPK         | 59 | 3430 | 1.04 | 0.13 | 13  |
| 22 T10F2.1a          | RLLEDTEIALAPK         | 61 | 4677 | 1.04 | 0.11 | 11  |
| 22 T10F2.1a          | LAPLRAAVK             | 13 | 6290 | 1.06 | 0.25 | 24  |
| 22 T10F2.1a          | RLLEDTEIALAPK         | 63 | 3607 | 1.06 | 0.14 | 13  |
| 22 T10F2.1a          | RLLEDTEIALAPK         | 11 | 1323 | 1.10 | 0.20 | 18  |
| 1 T10F2.1a           | RLLEDTEIALAPK         | 30 | 934  | 1.22 | 0.24 | 20  |
| 1 T10F2.1a           | RLLEDTEIALAPK         | 45 | 947  | 1.30 | 0.22 | 17  |
| 7 T10F2.1a           | RLLEDTEIALAPK         | 11 | 891  | 1.48 | 0.11 | 8   |
| 22 T10F2.1a          | LAPLRAAVK             | 15 | 4658 | 1.71 | 0.15 | 9   |
| 10 T10F2.1a;T10F2.1b | AFLRPETAQGIFVNFK      | 36 | 2043 | 0.38 | 0.08 | 20  |
| 10 T10F2.1a;T10F2.1b | AFLRPETAQGIFVNFK      | 31 | 2251 | 0.39 | 0.27 | 68  |
| 10 T10F2.1a;T10F2.1b | QDGGQDVLARLEGFDNK     | 13 | 1568 | 0.66 | 0.23 | 35  |
| 10 T10F2.1a;T10F2.1b | EASFDRLK              | 24 | 5506 | 0.79 | 0.06 | 8   |
| 10 T10F2.1a;T10F2.1b | EASFDRLK              | 26 | 5710 | 0.82 | 0.06 | 8   |
| 10 T10F2.1a;T10F2.1b | RLLEDTEIALAPK         | 66 | 4994 | 0.87 | 0.09 | 10  |
| 10 T10F2.1a;T10F2.1b | RLLEDTEIALAPK         | 76 | 4539 | 0.89 | 0.09 | 10  |
| 10 T10F2.1a;T10F2.1b | RLLEDTEIALAPK         | 71 | 4317 | 0.94 | 0.08 | 8   |
| 10 T10F2.1a;T10F2.1b | RLLEDTEIALAPK         | 29 | 1615 | 0.97 | 0.08 | 9   |
| 10 T10F2.1a;T10F2.1b | RLLEDTEIALAPK         | 27 | 2575 | 1.00 | 0.18 | 18  |
| 10 T10F2.1a;T10F2.1b | RLLEDTEIALAPK         | 24 | 4384 | 1.04 | 0.16 | 15  |
| 10 T10F2.1a;T10F2.1b | RLLEDTEIALAPK         | 25 | 3968 | 1.16 | 0.16 | 14  |
| 10 T10F2.1a;T10F2.1b | RLLEDTEIALAPK         | 39 | 1774 | 1.28 | 0.12 | 10  |
| 10 T10F2.1a;T10F2.1b | RLLEDTEIALAPK         | 66 | 2527 | 1.56 | 0.13 | 8   |
| 10 T10F2.1a;T10F2.1b | RLLEDTEIALAPK         | 34 | 3093 | 1.58 | 0.13 | 8   |
| 10 T10F2.1a;T10F2.1b | LAPLRAAVK             | 12 | 4926 | 1.94 | 0.22 | 11  |
| 10 T10F2.1a;T10F2.1b | RLLEFNQGK             | 10 | 1943 | 2.23 | 0.06 | 3   |
| 10 T10F2.4           | VQVLHVK               | 15 | 2297 | 5.63 | 0.30 | 5   |
| 10 T10F2.4           | VQVLHVK               | 22 | 3665 | 6.10 | 0.35 | 6   |
| 1 T12D8.8            | AISINPDSAQGYK         | 13 | 1584 | 0.57 | 0.09 | 15  |
| 7 T12D8.8            | AISINPDSAQGYK         | 32 | 5845 | 0.72 | 0.14 | 19  |
| 22 T12D8.8           | AISINPDSAQGYK         | 21 | 2466 | 0.79 | 0.17 | 21  |
| 7 T12D8.8            | AISINPDSAQGYK         | 33 | 2655 | 1.07 | 0.13 | 12  |
| 10 T12D8.8           | RANVLLK               | 14 | 5983 | 1.57 | 0.21 | 14  |
| 1 T12D8.8            | RANVLLK               | 11 | 972  | 2.03 | 0.22 | 11  |
| 7 T12D8.8            | RANVLLK               | 12 | 2500 | 3.22 | 0.11 | 3   |
| 7 T12D8.9a;T12D8.9b  | IHEQTDK               | 10 | 1144 | 0.89 | 0.28 | 31  |
| 10 T14D7.1           | HGLEPFVVDEK           | 44 | 2353 | 0.69 | 0.07 | 10  |
| 22 T14D7.1           | HGLEPFVVDEK           | 38 | 1243 | 1.04 | 0.08 | 8   |
| 22 T14F9.1           | LMVHNWEYLGK           | 22 | 2589 | 0.40 | 0.21 | 52  |
| 1 T14F9.1            | TLELMDAK              | 22 | 1925 | 0.42 | 0.13 | 30  |
| 1 T14F9.1            | TLELMDAK              | 33 | 2119 | 0.44 | 0.18 | 41  |
| 22 T14F9.1           | TVVEQYQGK             | 22 | 3048 | 0.47 | 0.06 | 14  |
| 7 T14F9.1            | TMANLITQVAK           | 16 | 1214 | 0.51 | 0.13 | 25  |
| 10 T14F9.1           | TLELMDAK              | 30 | 1604 | 0.51 | 0.11 | 22  |
| 1 T14F9.1            | QLDSDVQTDTVAVK        | 58 | 1128 | 0.53 | 0.31 | 58  |
| 22 T14F9.1           | TLELMDAK              | 47 | 3184 | 0.62 | 0.08 | 13  |
| 22 T14F9.1           | TLELMDAK              | 51 | 3289 | 0.67 | 0.15 | 23  |
| 7 T14F9.1            | LMVHNWEYLGK           | 17 | 2003 | 0.72 | 0.14 | 19  |
| 1 T14F9.1            | TMANLITQVAK           | 20 | 568  | 0.75 | 0.14 | 19  |
| 1 T14F9.1            | QLDSDVQTDTVAVK        | 82 | 2007 | 0.75 | 0.13 | 17  |
| 22 T14F9.1           | QLDSDVQTDTVAVK        | 29 | 680  | 0.77 | 0.21 | 27  |
| 7 T14F9.1            | LMVHNWEYLGK           | 37 | 2948 | 0.79 | 0.24 | 30  |
| 22 T14F9.1           | FWRENASK              | 12 | 2739 | 0.80 | 0.21 | 26  |
| 22 T14F9.1           | TLELMDAK              | 24 | 2231 | 0.81 | 0.10 | 12  |
| 7 T14F9.1            | TMANLITQVAK           | 14 | 1338 | 0.85 | 0.21 | 24  |
| 22 T14F9.1           | LMVHNWEYLGK           | 30 | 3946 | 0.87 | 0.14 | 16  |
| 10 T14F9.1           | TVVEQYQGK             | 14 | 2490 | 0.88 | 0.14 | 16  |
| 1 T14F9.1            | TMANLITQVAK           | 45 | 952  | 0.90 | 0.17 | 18  |
| 1 T14F9.1            | TMANLITQVAK           | 20 | 639  | 0.94 | 0.21 | 22  |
| 22 T14F9.1           | TMANLITQVAK           | 57 | 1435 | 0.95 | 0.22 | 23  |
| 7 T14F9.1            | LMVHNWEYLGK           | 11 | 1978 | 0.98 | 0.09 | 9   |
| 22 T14F9.1           | TMANLITQVAK           | 49 | 1445 | 1.03 | 0.19 | 18  |
| 22 T14F9.1           | TMANLITQVAK           | 34 | 1104 | 1.04 | 0.14 | 14  |
| 1 T14F9.1            | TMANLITQVAK           | 37 | 940  | 1.06 | 0.20 | 19  |
| 1 T14F9.1            | FWRENASK              | 13 | 2054 | 1.07 | 0.11 | 10  |
| 22 T14F9.1           | QLDSDVQTDTVAVK        | 36 | 896  | 1.07 | 0.12 | 11  |
| 7 T14F9.1            | TMANLITQVAK           | 11 | 1075 | 1.09 | 0.19 | 17  |
| 1 T14F9.1            | TMANLITQVAK           | 38 | 1034 | 1.14 | 0.19 | 17  |
| 22 T14F9.1           | TMANLITQVAK           | 34 | 1124 | 1.20 | 0.21 | 18  |
| 7 T14F9.1            | TMANLITQVAK           | 15 | 1491 | 1.25 | 0.08 | 6   |
| 1 T14F9.1            | TMANLITQVAK           | 68 | 1302 | 1.67 | 0.17 | 10  |
| 10 T14F9.1           | QLDSDVQTDTVAVK        | 72 | 1739 | 1.84 | 0.08 | 4   |
| 1 T14F9.1            | TMANLITQVAK           | 42 | 975  | 2.05 | 0.20 | 10  |
| 10 T14F9.1           | TMANLITQVAK           | 44 | 947  | 2.42 | 0.19 | 8   |
| 7 T14F9.1            | TMANLITQVAK           | 26 | 995  | 2.90 | 0.15 | 5   |
| 1 T14G8.3a;T14G8.3b  | VLPFNVHEK             | 11 | 2397 | 0.80 | 0.14 | 18  |
| 1 T14G8.3a;T14G8.3b  | DISTNARAIGK           | 16 | 1661 | 0.88 | 0.32 | 37  |
| 1 T14G8.3a;T14G8.3b  | VLPFNVHEK             | 14 | 2532 | 1.39 | 0.19 | 14  |
| 1 T14G8.3a;T14G8.3b  | DISTNARAIGK           | 37 | 2179 | 1.81 | 0.12 | 6   |
| 1 T14G8.3a;T14G8.3b  | DISTNARAIGK           | 13 | 1947 | 2.17 | 0.15 | 7   |
| 7 T14G8.3b;T14G8.3a  | AILEEVAVLK            | 65 | 3549 | 0.10 | 0.17 | 167 |
| 7 T14G8.3b;T14G8.3a  | AILEEVAVLK            | 63 | 1818 | 0.22 | 0.19 | 89  |
| 7 T14G8.3b;T14G8.3a  | DISTNARAIGK           | 38 | 4766 | 0.24 | 0.20 | 85  |
| 7 T14G8.3b;T14G8.3a  | DISTNARAIGK           | 28 | 3274 | 0.27 | 0.22 | 82  |
| 10 T14G8.3b;T14G8.3a | AILEEVAVLK            | 51 | 1413 | 0.42 | 0.09 | 22  |
| 10 T14G8.3b;T14G8.3a | TTATIVQYVLESTRK       | 44 | 383  | 0.42 | 0.17 | 41  |
| 22 T14G8.3b;T14G8.3a | DISTNARAIGK           | 29 | 4176 | 0.44 | 0.16 | 35  |
| 22 T14G8.3b;T14G8.3a | AILEEVAVLK            | 71 | 2192 | 0.49 | 0.15 | 30  |
| 22 T14G8.3b;T14G8.3a | VLPFNVHEK             | 22 | 6744 | 0.50 | 0.11 | 23  |
| 22 T14G8.3b;T14G8.3a | DISTNARAIGK           | 45 | 5174 | 0.50 | 0.17 | 33  |
| 22 T14G8.3b;T14G8.3a | AILEEVAVLK            | 58 | 2017 | 0.50 | 0.14 | 29  |
| 10 T14G8.3b;T14G8.3a | QERLDIPK              | 11 | 7867 | 0.58 | 0.26 | 44  |
| 22 T14G8.3b;T14G8.3a | VLPFNVHEK             | 10 | 7492 | 0.59 | 0.18 | 31  |

|                      |                   |    |       |      |      |    |
|----------------------|-------------------|----|-------|------|------|----|
| 22 T14G8.3b;T14G8.3a | VLPFNVHEK         | 21 | 6212  | 0.60 | 0.12 | 21 |
| 10 T14G8.3b;T14G8.3a | TTATIVQYVLESTRK   | 14 | 341   | 0.61 | 0.20 | 33 |
| 10 T14G8.3b;T14G8.3a | DISTNARAIGK       | 23 | 3108  | 0.64 | 0.13 | 20 |
| 10 T14G8.3b;T14G8.3a | AILEEVAVLK        | 64 | 1318  | 0.65 | 0.15 | 23 |
| 22 T14G8.3b;T14G8.3a | VLPFNVHEK         | 17 | 5332  | 0.65 | 0.12 | 19 |
| 10 T14G8.3b;T14G8.3a | DISTNARAIGK       | 47 | 7680  | 0.68 | 0.18 | 26 |
| 10 T14G8.3b;T14G8.3a | DISTNARAIGK       | 43 | 6186  | 0.86 | 0.17 | 20 |
| 10 T14G8.3b;T14G8.3a | AILEEVAVLK        | 62 | 1850  | 0.90 | 0.13 | 14 |
| 10 T14G8.3b;T14G8.3a | TFTDTELEVLTk      | 61 | 1131  | 1.02 | 0.24 | 24 |
| 10 T14G8.3b;T14G8.3a | NPLSTVEISGVK      | 60 | 1928  | 1.05 | 0.12 | 11 |
| 10 T14G8.3b;T14G8.3a | VLPFNVHEK         | 13 | 4051  | 1.15 | 0.11 | 10 |
| 10 T14G8.3b;T14G8.3a | TFTDTELEVLTk      | 50 | 712   | 1.18 | 0.23 | 20 |
| 10 T14G8.3b;T14G8.3a | NPLSTVEISGVK      | 27 | 1385  | 1.18 | 0.11 | 9  |
| 10 T14G8.3b;T14G8.3a | VLPFNVHEK         | 14 | 5744  | 1.35 | 0.16 | 12 |
| 10 T14G8.3b;T14G8.3a | NPLSTVEISGVK      | 28 | 935   | 1.45 | 0.11 | 8  |
| 10 T14G8.3b;T14G8.3a | VLPFNVHEK         | 15 | 5491  | 1.58 | 0.21 | 13 |
| 10 T14G8.3b;T14G8.3a | NPLSTVEISGVK      | 38 | 2728  | 1.69 | 0.16 | 9  |
| 10 T14G8.3b;T14G8.3a | TVVFPYK           | 20 | 1764  | 1.73 | 0.10 | 6  |
| 7 T14G8.3b;T14G8.3a  | VLPFNVHEK         | 20 | 3382  | 1.76 | 0.22 | 12 |
| 10 T14G8.3b;T14G8.3a | NPLSTVEISGVK      | 58 | 1841  | 2.04 | 0.15 | 7  |
| 10 T14G8.3b;T14G8.3a | NPLSTVEISGVK      | 30 | 1228  | 2.08 | 0.16 | 8  |
| 22 T14G8.3b;T14G8.3a | DISTNARAIGK       | 46 | 8522  | 2.14 | 0.25 | 12 |
| 7 T14G8.3b;T14G8.3a  | VLPFNVHEK         | 14 | 4784  | 2.25 | 0.23 | 10 |
| 22 T14G8.3b;T14G8.3a | NPLSTVEISGVK      | 42 | 1871  | 2.34 | 0.19 | 8  |
| 22 T14G8.3b;T14G8.3a | VLPFNVHEK         | 25 | 6652  | 2.78 | 0.16 | 6  |
| 22 T14G8.3b;T14G8.3a | DISTNARAIGK       | 51 | 5725  | 2.80 | 0.13 | 5  |
| 22 T14G8.3b;T14G8.3a | NPLSTVEISGVK      | 32 | 2065  | 3.01 | 0.16 | 5  |
| 22 T14G8.3b;T14G8.3a | TFTDTELEVLTk      | 44 | 650   | 3.20 | 0.13 | 4  |
| 22 T14G8.3b;T14G8.3a | TFTDTELEVLTk      | 33 | 445   | 3.37 | 0.22 | 7  |
| 22 T14G8.3b;T14G8.3a | AILEEVAVLK        | 56 | 1471  | 3.40 | 0.15 | 4  |
| 22 T14G8.3b;T14G8.3a | AILEEVAVLK        | 79 | 2535  | 3.64 | 0.12 | 3  |
| 7 T14G8.3b;T14G8.3a  | DISTNARAIGK       | 26 | 1692  | 3.70 | 0.24 | 6  |
| 22 T14G8.3b;T14G8.3a | VLPFNVHEK         | 16 | 3726  | 4.41 | 0.20 | 4  |
| 10 T16G1.11          | YDEAVVRQVLLK      | 45 | 2434  | 0.28 | 0.15 | 53 |
| 7 T16G1.11           | DIVLTILK          | 12 | 678   | 0.44 | 0.17 | 38 |
| 1 T16G1.11           | ENGDVFFVANHEGTIK  | 58 | 1368  | 0.49 | 0.22 | 45 |
| 1 T16G1.11           | TLMVLPSSDFALAK    | 11 | 797   | 0.54 | 0.17 | 32 |
| 10 T16G1.11          | YDEAVVRQVLLK      | 12 | 1602  | 0.63 | 0.26 | 41 |
| 1 T16G1.11           | DIVLTILK          | 15 | 767   | 0.64 | 0.19 | 29 |
| 22 T16G1.11          | YDEAVVRQVLLK      | 45 | 5864  | 0.64 | 0.14 | 22 |
| 22 T16G1.11          | MLSRLLGGASDK      | 14 | 1425  | 0.70 | 0.09 | 13 |
| 22 T16G1.11          | ENGDVFFVANHEGTIK  | 67 | 4207  | 0.75 | 0.08 | 10 |
| 10 T16G1.11          | YDEAVVRQVLLK      | 51 | 4468  | 0.78 | 0.15 | 19 |
| 10 T16G1.11          | MLSRLLGGASDK      | 12 | 1299  | 0.81 | 0.19 | 23 |
| 22 T16G1.11          | TLMVLPSSDFALAK    | 32 | 2395  | 0.83 | 0.11 | 14 |
| 22 T16G1.11          | ENGDVFFVANHEGTIK  | 69 | 5217  | 0.83 | 0.12 | 14 |
| 22 T16G1.11          | TLMVLPSSDFALAK    | 34 | 3258  | 0.86 | 0.11 | 13 |
| 22 T16G1.11          | TLMVLPSSDFALAK    | 34 | 2404  | 0.88 | 0.17 | 19 |
| 10 T16G1.11          | ENGDVFFVANHEGTIK  | 72 | 5484  | 0.91 | 0.11 | 12 |
| 10 T16G1.11          | YDEAVVRQVLLK      | 37 | 3373  | 0.93 | 0.16 | 17 |
| 22 T16G1.11          | EVTALAQSGWEAK     | 40 | 653   | 0.96 | 0.18 | 18 |
| 10 T16G1.11          | EVTALAQSGWEAK     | 83 | 1926  | 0.97 | 0.19 | 19 |
| 10 T16G1.11          | ENGDVFFVANHEGTIK  | 66 | 6057  | 0.98 | 0.16 | 16 |
| 1 T16G1.11           | ENGDVFFVANHEGTIK  | 40 | 1128  | 1.00 | 0.11 | 11 |
| 22 T16G1.11          | MLSRLLGGASDK      | 17 | 1403  | 1.03 | 0.19 | 19 |
| 10 T16G1.11          | TLMVLPSSDFALAK    | 39 | 2472  | 1.04 | 0.13 | 13 |
| 10 T16G1.11          | EVTALAQSGWEAK     | 54 | 774   | 1.11 | 0.12 | 11 |
| 10 T16G1.11          | MLSRLLGGASDK      | 25 | 1720  | 1.12 | 0.11 | 10 |
| 10 T16G1.11          | TLMVLPSSDFALAK    | 40 | 2291  | 1.17 | 0.09 | 8  |
| 10 T16G1.11          | TLMVLPSSDFALAK    | 15 | 2116  | 1.21 | 0.14 | 11 |
| 22 T16G1.11          | EVTALAQSGWEAK     | 37 | 842   | 1.21 | 0.17 | 14 |
| 22 T16G1.11          | TLMVLPSSDFALAK    | 17 | 2842  | 1.24 | 0.11 | 9  |
| 22 T16G1.11          | LYQLNPEK          | 10 | 4331  | 1.27 | 0.13 | 10 |
| 10 T16G1.11          | LYQLNPEK          | 25 | 6553  | 1.62 | 0.18 | 11 |
| 10 T16G1.11          | TLMVLPSSDFALAK    | 42 | 5918  | 1.64 | 0.18 | 11 |
| 10 T16G1.11          | LYQLNPEK          | 14 | 6519  | 1.98 | 0.22 | 11 |
| 10 T16G1.11          | TLMVLPSSDFALAK    | 40 | 4398  | 2.10 | 0.09 | 4  |
| 7 T16G1.11           | DIVLTILK          | 27 | 1012  | 3.43 | 0.21 | 6  |
| 22 T17E9.2a;T17E9.2b | FDVFNALDLMHNEK    | 20 | 437   | 0.85 | 0.26 | 31 |
| 22 T18D3.4           | LQFSNELDHAK       | 45 | 1012  | 0.64 | 0.28 | 44 |
| 1 T18D3.4            | LQFSNELDHAK       | 14 | 560   | 0.71 | 0.18 | 26 |
| 22 T18D3.4           | LIDQHLGK          | 27 | 1164  | 0.78 | 0.16 | 21 |
| 22 T18D3.4           | LIDQHLGK          | 33 | 1083  | 0.93 | 0.25 | 27 |
| 1 T18D3.4            | ATDLTLAQK         | 15 | 250   | 0.93 | 0.25 | 27 |
| 10 T18D3.4           | LIDQHLGK          | 18 | 1232  | 0.99 | 0.15 | 15 |
| 10 T18D3.4           | LIDQHLGK          | 31 | 1385  | 1.04 | 0.13 | 13 |
| 10 T18D3.4           | LQFSNELDHAK       | 65 | 1009  | 1.06 | 0.07 | 7  |
| 1 T18D3.4            | LIDQHLGK          | 28 | 706   | 1.19 | 0.34 | 28 |
| 1 T18D3.4            | LQFSNELDHAK       | 56 | 830   | 1.32 | 0.08 | 6  |
| 22 T18D3.4           | ATDLTLAQK         | 21 | 521   | 1.33 | 0.25 | 19 |
| 1 T18D3.4            | LIDQHLGK          | 26 | 972   | 1.37 | 0.14 | 10 |
| 1 T18D3.4            | FGEQLTVLK         | 13 | 490   | 1.69 | 0.23 | 14 |
| 1 T18D3.4            | LQFSNELDHAK       | 43 | 514   | 2.15 | 0.13 | 6  |
| 7 T18H9.2a;T18H9.2b  | MSAIGSGSYHSSK     | 57 | 1488  | 0.39 | 0.17 | 44 |
| 7 T18H9.2a;T18H9.2b  | MSAIGSGSYHSSK     | 47 | 4195  | 0.52 | 0.14 | 28 |
| 22 T18H9.2a;T18H9.2b | GWQVISDTGTSLIGGPK | 97 | 5042  | 0.59 | 0.12 | 20 |
| 7 T18H9.2a;T18H9.2b  | MSAIGSGSYHSSK     | 61 | 1014  | 0.63 | 0.08 | 13 |
| 22 T18H9.2a;T18H9.2b | GWQVISDTGTSLIGGPK | 82 | 2420  | 0.70 | 0.16 | 23 |
| 7 T18H9.2a;T18H9.2b  | GWQVISDTGTSLIGGPK | 86 | 1161  | 0.83 | 0.24 | 29 |
| 22 T18H9.2a;T18H9.2b | MSAIGSGSYHSSK     | 73 | 11347 | 0.84 | 0.16 | 19 |
| 10 T18H9.2a;T18H9.2b | GWQVISDTGTSLIGGPK | 75 | 840   | 0.87 | 0.13 | 15 |
| 7 T18H9.2a;T18H9.2b  | MSAIGSGSYHSSK     | 40 | 2558  | 0.89 | 0.11 | 12 |
| 22 T18H9.2a;T18H9.2b | MSAIGSGSYHSSK     | 69 | 8994  | 1.05 | 0.11 | 10 |
| 1 T18H9.2a;T18H9.2b  | MSAIGSGSYHSSK     | 51 | 5347  | 1.06 | 0.15 | 14 |
| 7 T18H9.2a;T18H9.2b  | MSAIGSGSYHSSK     | 48 | 1492  | 1.28 | 0.15 | 12 |
| 1 T18H9.2a;T18H9.2b  | GWQVISDTGTSLIGGPK | 18 | 541   | 1.35 | 0.21 | 15 |
| 10 T18H9.2a;T18H9.2b | MSAIGSGSYHSSK     | 55 | 3924  | 1.37 | 0.07 | 5  |
| 10 T18H9.2a;T18H9.2b | MSAIGSGSYHSSK     | 67 | 4571  | 1.45 | 0.11 | 7  |
| 7 T18H9.2a;T18H9.2b  | MSAIGSGSYHSSK     | 55 | 3861  | 1.55 | 0.11 | 7  |
| 10 T18H9.2a;T18H9.2b | MSAIGSGSYHSSK     | 67 | 10078 | 1.60 | 0.17 | 10 |
| 10 T18H9.2a;T18H9.2b | GWQVISDTGTSLIGGPK | 90 | 1163  | 1.65 | 0.20 | 12 |

|                      |                   |     |       |       |      |     |
|----------------------|-------------------|-----|-------|-------|------|-----|
| 22 T18H9.2a;T18H9.2b | MSAIGSGSYHSSK     | 62  | 5581  | 1.75  | 0.13 | 7   |
| 10 T18H9.2a;T18H9.2b | MSAIGSGSYHSSK     | 75  | 9104  | 1.76  | 0.14 | 8   |
| 22 T18H9.2a;T18H9.2b | MSAIGSGSYHSSK     | 78  | 16026 | 1.86  | 0.15 | 8   |
| 7 T18H9.2a;T18H9.2b  | MSAIGSGSYHSSK     | 39  | 2692  | 1.94  | 0.11 | 6   |
| 22 T18H9.2a;T18H9.2b | GWQVISDTGTSLIGGPK | 98  | 2098  | 2.13  | 0.15 | 7   |
| 22 T18H9.2a;T18H9.2b | MSAIGSGSYHSSK     | 82  | 14959 | 2.49  | 0.11 | 4   |
| 22 T18H9.2a;T18H9.2b | GWQVISDTGTSLIGGPK | 71  | 950   | 3.10  | 0.22 | 7   |
| 10 T18H9.2a;T18H9.2b | GWQVISDTGTSLIGGPK | 75  | 2023  | 11.18 | 0.13 | 1   |
| 10 T18H9.2a;T18H9.2b | GWQVISDTGTSLIGGPK | 86  | 2890  | 11.32 | 0.40 | 4   |
| 22 T19B10.2          | DRCVLAANDLSHNAWDK | 34  | 3009  | 0.94  | 0.24 | 26  |
| 7 T19B10.2           | VIADTTGAATTQLK    | 18  | 970   | 1.04  | 0.15 | 15  |
| 10 T19C4.6a;T19C4.6b | LLLLGAGESGK       | 47  | 1654  | 0.90  | 0.22 | 24  |
| 10 T19C4.6a;T19C4.6b | LLLLGAGESGK       | 44  | 1401  | 1.24  | 0.22 | 18  |
| 10 T19C4.6a;T19C4.6b | LLLLGAGESGK       | 49  | 1195  | 1.30  | 0.19 | 14  |
| 10 T19C4.6a;T19C4.6b | LLLLGAGESGK       | 56  | 964   | 1.67  | 0.17 | 10  |
| 10 T19C4.6a;T19C4.6b | LLLLGAGESGK       | 40  | 1094  | 1.67  | 0.15 | 9   |
| 10 T19C4.6a;T19C4.6b | LLLLGAGESGK       | 29  | 938   | 1.70  | 0.12 | 7   |
| 10 T19C4.6a;T19C4.6b | LLLLGAGESGK       | 28  | 979   | 2.10  | 0.12 | 6   |
| 10 T19C4.6a;T19C4.6b | LLLLGAGESGK       | 31  | 1037  | 3.02  | 0.23 | 7   |
| 10 T19H12.2          | LELLSMVK          | 29  | 765   | 0.63  | 0.29 | 47  |
| 22 T19H12.2          | LELLSMVK          | 19  | 1015  | 1.06  | 0.12 | 12  |
| 10 T20F5.2           | ATFAYGAILADSENDK  | 60  | 2619  | 0.31  | 0.19 | 61  |
| 10 T20F5.2           | DMTEAEGALMNMK     | 52  | 3119  | 0.46  | 0.16 | 34  |
| 10 T20F5.2           | DMTEAEGALMNMK     | 32  | 3136  | 0.48  | 0.17 | 36  |
| 1 T20F5.2            | DMTEAEGALMNMK     | 41  | 1666  | 0.50  | 0.13 | 26  |
| 1 T20F5.2            | ATFAYGAILADSENDK  | 64  | 2424  | 0.57  | 0.15 | 26  |
| 10 T20F5.2           | DMTEAEGALMNMK     | 29  | 1922  | 0.57  | 0.29 | 51  |
| 1 T20F5.2            | ATFAYGAILADSENDK  | 64  | 2093  | 0.57  | 0.18 | 31  |
| 10 T20F5.2           | DMTEAEGALMNMK     | 32  | 2267  | 0.66  | 0.11 | 17  |
| 7 T20F5.2            | RRFVANIPGYK       | 11  | 3764  | 0.66  | 0.15 | 22  |
| 1 T20F5.2            | DMTEAEGALMNMK     | 11  | 667   | 0.74  | 0.08 | 11  |
| 10 T20F5.2           | ATFAYGAILADSENDK  | 108 | 3863  | 0.85  | 0.17 | 20  |
| 22 T20F5.2           | ATFAYGAILADSENDK  | 103 | 5034  | 0.92  | 0.22 | 24  |
| 10 T20F5.2           | ATFAYGAILADSENDK  | 82  | 3178  | 0.95  | 0.23 | 25  |
| 22 T20F5.2           | RRFVANIPGYK       | 20  | 10676 | 0.99  | 0.18 | 18  |
| 7 T20F5.2            | ATFAYGAILADSENDK  | 47  | 1924  | 1.02  | 0.17 | 17  |
| 22 T20F5.2           | RRFVANIPGYK       | 26  | 14853 | 1.08  | 0.25 | 23  |
| 22 T20F5.2           | RRFVANIPGYK       | 11  | 719   | 1.09  | 0.22 | 20  |
| 7 T20F5.2            | ATFAYGAILADSENDK  | 69  | 2768  | 1.12  | 0.17 | 15  |
| 22 T20F5.2           | ATFAYGAILADSENDK  | 63  | 3206  | 1.22  | 0.17 | 14  |
| 10 T20F5.2           | RRFVANIPGYK       | 17  | 25894 | 1.27  | 0.14 | 11  |
| 1 T20F5.2            | ATFAYGAILADSENDK  | 57  | 889   | 1.48  | 0.18 | 12  |
| 1 T20F5.2            | ATFAYGAILADSENDK  | 58  | 1487  | 1.54  | 0.30 | 20  |
| 10 T20F5.2           | RRFVANIPGYK       | 11  | 13567 | 3.46  | 0.26 | 7   |
| 22 T20F5.2           | ATFAYGAILADSENDK  | 74  | 2568  | 4.17  | 0.18 | 4   |
| 22 T20F5.2           | ATFAYGAILADSENDK  | 56  | 1603  | 4.96  | 0.23 | 5   |
| 10 T20G5.1           | AHQNVEDVVYWK      | 44  | 1865  | 0.38  | 0.39 | 103 |
| 22 T20G5.1           | YIQAARTGTGQIK     | 26  | 1170  | 0.38  | 0.11 | 29  |
| 22 T20G5.1           | VVQSFAETGQFDK     | 41  | 1263  | 0.41  | 0.20 | 49  |
| 22 T20G5.1           | YIQAARTGTGQIK     | 52  | 1556  | 0.43  | 0.18 | 41  |
| 1 T20G5.1            | QGIIYLVTK         | 11  | 264   | 0.46  | 0.07 | 15  |
| 10 T20G5.1           | IYIDSNNNPERFLK    | 19  | 1060  | 0.47  | 0.14 | 28  |
| 10 T20G5.1           | YIEVFVQK          | 21  | 670   | 0.50  | 0.06 | 11  |
| 10 T20G5.1           | YIEVFVQK          | 24  | 787   | 0.50  | 0.11 | 21  |
| 22 T20G5.1           | QGIIYLVTK         | 31  | 2191  | 0.53  | 0.11 | 21  |
| 22 T20G5.1           | ILFNNVSNFAK       | 38  | 962   | 0.54  | 0.16 | 29  |
| 22 T20G5.1           | IYIDSNNNPERFLK    | 20  | 1457  | 0.55  | 0.23 | 41  |
| 22 T20G5.1           | VVQSFAETGQFDK     | 43  | 1321  | 0.58  | 0.10 | 17  |
| 10 T20G5.1           | QGIIYLVTK         | 36  | 1881  | 0.58  | 0.14 | 24  |
| 22 T20G5.1           | QGIIYLVTK         | 45  | 2441  | 0.59  | 0.06 | 11  |
| 22 T20G5.1           | IYIDSNNNPERFLK    | 12  | 1824  | 0.63  | 0.21 | 34  |
| 10 T20G5.1           | ILFNNVSNFAK       | 27  | 1266  | 0.67  | 0.17 | 25  |
| 10 T20G5.1           | ILFNNVSNFAK       | 38  | 946   | 0.68  | 0.12 | 18  |
| 10 T20G5.1           | ILFNNVSNFAK       | 13  | 673   | 0.69  | 0.20 | 30  |
| 22 T20G5.1           | ILFNNVSNFAK       | 25  | 911   | 0.69  | 0.23 | 34  |
| 22 T20G5.1           | ILFNNVSNFAK       | 12  | 609   | 0.71  | 0.22 | 30  |
| 10 T20G5.1           | YIQAARTGTGQIK     | 32  | 1155  | 0.76  | 0.14 | 18  |
| 1 T20G5.1            | QGIIYLVTK         | 13  | 334   | 0.79  | 0.09 | 11  |
| 10 T20G5.1           | QGIIYLVTK         | 24  | 1461  | 0.80  | 0.36 | 45  |
| 22 T20G5.1           | QGIIYLVTK         | 22  | 869   | 0.81  | 0.22 | 27  |
| 10 T20G5.1           | VVQSFAETGQFDK     | 58  | 730   | 0.85  | 0.16 | 19  |
| 10 T20G5.1           | ILFNNVSNFAK       | 37  | 1430  | 0.88  | 0.19 | 22  |
| 10 T20G5.1           | ILFNNVSNFAK       | 39  | 978   | 0.88  | 0.22 | 25  |
| 10 T20G5.1           | YIQAARTGTGQIK     | 34  | 1017  | 0.98  | 0.19 | 19  |
| 10 T20G5.1           | YIQAARTGTGQIK     | 48  | 1340  | 1.04  | 0.13 | 13  |
| 22 T20G5.1           | VVQSFAETGQFDK     | 42  | 1127  | 1.13  | 0.11 | 10  |
| 10 T20G5.1           | VVQSFAETGQFDK     | 40  | 1035  | 1.13  | 0.20 | 17  |
| 10 T20G5.1           | NLARYLVK          | 14  | 1032  | 1.13  | 0.15 | 13  |
| 1 T20G5.1            | ILFNNVSNFAK       | 16  | 432   | 1.15  | 0.19 | 16  |
| 10 T20G5.1           | ILFNNVSNFAK       | 34  | 1253  | 1.23  | 0.13 | 11  |
| 10 T20G5.1           | YIQAARTGTGQIK     | 23  | 1094  | 1.49  | 0.17 | 11  |
| 22 T20G5.1           | YIQAARTGTGQIK     | 32  | 1103  | 1.61  | 0.14 | 9   |
| 22 T20G5.1           | ILFNNVSNFAK       | 30  | 1151  | 1.68  | 0.20 | 12  |
| 22 T20G5.1           | ILFNNVSNFAK       | 57  | 1334  | 2.45  | 0.17 | 7   |
| 7 T20G5.2            | SHSTDGLIK         | 28  | 2260  | 0.10  | 0.44 | 461 |
| 10 T20G5.2           | ITPGILLEQGK       | 43  | 2352  | 0.11  | 0.12 | 106 |
| 1 T20G5.2            | SHSTDGLIK         | 43  | 1866  | 0.11  | 0.26 | 227 |
| 7 T20G5.2            | LVSTLYK           | 22  | 642   | 0.15  | 0.23 | 154 |
| 1 T20G5.2            | SHSTDGLIK         | 33  | 2401  | 0.17  | 0.14 | 84  |
| 10 T20G5.2           | HLPNDDLFK         | 17  | 9125  | 0.18  | 0.35 | 193 |
| 10 T20G5.2           | SGQVVPYGYGHAVLRK  | 20  | 32031 | 0.20  | 0.25 | 127 |
| 10 T20G5.2           | HLPNDDLFK         | 10  | 6383  | 0.20  | 0.45 | 223 |
| 10 T20G5.2           | SHSTDGLIK         | 27  | 7815  | 0.26  | 0.14 | 56  |
| 7 T20G5.2            | ITPGILLEQGK       | 87  | 11765 | 0.27  | 0.11 | 41  |
| 7 T20G5.2            | FAGAYARGVAK       | 47  | 8573  | 0.27  | 0.12 | 46  |
| 10 T20G5.2           | ITPGILLEQGK       | 38  | 2169  | 0.29  | 0.17 | 58  |
| 7 T20G5.2            | ITPGILLEQGK       | 19  | 884   | 0.29  | 0.22 | 76  |
| 7 T20G5.2            | LVSTLYK           | 30  | 2705  | 0.30  | 0.20 | 68  |
| 1 T20G5.2            | SHSTDGLIK         | 20  | 991   | 0.32  | 0.08 | 24  |
| 10 T20G5.2           | ITPGILLEQGK       | 26  | 2436  | 0.33  | 0.15 | 46  |
| 1 T20G5.2            | FAGAYARGVAK       | 29  | 557   | 0.34  | 0.18 | 53  |

|            |                             |    |        |      |      |    |
|------------|-----------------------------|----|--------|------|------|----|
| 22 T20G5.2 | ITPGILLEQGK                 | 57 | 3569   | 0.34 | 0.13 | 38 |
| 7 T20G5.2  | ITPGILLEQGK                 | 86 | 11473  | 0.36 | 0.06 | 18 |
| 1 T20G5.2  | SHSTDGLIK                   | 20 | 865    | 0.36 | 0.25 | 69 |
| 7 T20G5.2  | FAGAYARGVAK                 | 49 | 7057   | 0.37 | 0.13 | 36 |
| 7 T20G5.2  | LVSTLYK                     | 22 | 1213   | 0.39 | 0.16 | 41 |
| 1 T20G5.2  | ITPGILLEQGK                 | 25 | 870    | 0.39 | 0.29 | 75 |
| 10 T20G5.2 | FAGAYARGVAK                 | 26 | 2534   | 0.41 | 0.16 | 38 |
| 7 T20G5.2  | SGQVVPGYGHAVLRK             | 15 | 12738  | 0.42 | 0.17 | 41 |
| 10 T20G5.2 | ITPGILLEQGK                 | 31 | 3040   | 0.42 | 0.17 | 40 |
| 22 T20G5.2 | ITPGILLEQGK                 | 26 | 1576   | 0.43 | 0.18 | 43 |
| 10 T20G5.2 | SHSTDGLIK                   | 23 | 6407   | 0.43 | 0.18 | 41 |
| 22 T20G5.2 | ITPGILLEQGK                 | 44 | 3882   | 0.44 | 0.17 | 38 |
| 1 T20G5.2  | ITPGILLEQGK                 | 46 | 1887   | 0.44 | 0.10 | 23 |
| 7 T20G5.2  | SGQVVPGYGHAVLRK             | 13 | 12166  | 0.44 | 0.18 | 41 |
| 10 T20G5.2 | FAGAYARGVAK                 | 35 | 3076   | 0.44 | 0.14 | 33 |
| 7 T20G5.2  | ITPGILLEQGK                 | 33 | 1335   | 0.44 | 0.19 | 44 |
| 10 T20G5.2 | ITPGILLEQGK                 | 34 | 3822   | 0.44 | 0.25 | 56 |
| 1 T20G5.2  | ITPGILLEQGK                 | 10 | 1277   | 0.44 | 0.22 | 49 |
| 7 T20G5.2  | FAGAYARGVAK                 | 33 | 2535   | 0.46 | 0.14 | 31 |
| 1 T20G5.2  | ITPGILLEQGK                 | 15 | 1098   | 0.46 | 0.08 | 17 |
| 7 T20G5.2  | ITPGILLEQGK                 | 22 | 1930   | 0.48 | 0.21 | 45 |
| 22 T20G5.2 | ITPGILLEQGK                 | 15 | 1054   | 0.48 | 0.15 | 32 |
| 7 T20G5.2  | ITPGILLEQGK                 | 26 | 899    | 0.48 | 0.07 | 14 |
| 22 T20G5.2 | IVGEIGFNYTEEQLK             | 40 | 904    | 0.49 | 0.16 | 33 |
| 7 T20G5.2  | ITPGILLEQGK                 | 91 | 29164  | 0.49 | 0.15 | 31 |
| 22 T20G5.2 | LVSTLYK                     | 49 | 52657  | 0.49 | 0.12 | 25 |
| 22 T20G5.2 | LVSTLYK                     | 26 | 694    | 0.49 | 0.22 | 44 |
| 22 T20G5.2 | SFRTEHGSTVVQNVNIDMIYGGMRSMK | 22 | 14148  | 0.50 | 0.19 | 38 |
| 7 T20G5.2  | SGQVVPGYGHAVLRK             | 20 | 41047  | 0.51 | 0.20 | 40 |
| 7 T20G5.2  | LVSTLYK                     | 30 | 4451   | 0.51 | 0.17 | 34 |
| 10 T20G5.2 | ITPGILLEQGK                 | 28 | 1963   | 0.52 | 0.33 | 65 |
| 22 T20G5.2 | FAGAYARGVAK                 | 36 | 6001   | 0.52 | 0.07 | 14 |
| 1 T20G5.2  | FAGAYARGVAK                 | 20 | 749    | 0.52 | 0.09 | 18 |
| 22 T20G5.2 | LVSTLYK                     | 21 | 839    | 0.53 | 0.31 | 59 |
| 22 T20G5.2 | EWVWK                       | 11 | 8009   | 0.53 | 0.06 | 12 |
| 1 T20G5.2  | FAGAYARGVAK                 | 11 | 1408   | 0.54 | 0.11 | 21 |
| 22 T20G5.2 | ITPGILLEQGK                 | 20 | 1906   | 0.54 | 0.05 | 9  |
| 22 T20G5.2 | IVGEIGFNYTEEQLK             | 70 | 3360   | 0.55 | 0.09 | 17 |
| 7 T20G5.2  | ITPGILLEQGK                 | 80 | 40634  | 0.55 | 0.14 | 25 |
| 22 T20G5.2 | LVSTLYK                     | 44 | 42701  | 0.56 | 0.08 | 14 |
| 7 T20G5.2  | ITPGILLEQGK                 | 16 | 861    | 0.56 | 0.09 | 15 |
| 10 T20G5.2 | LVSTLYK                     | 17 | 1101   | 0.56 | 0.20 | 35 |
| 22 T20G5.2 | FAGAYARGVAK                 | 26 | 2976   | 0.57 | 0.19 | 33 |
| 7 T20G5.2  | ITPGILLEQGK                 | 10 | 487    | 0.57 | 0.10 | 17 |
| 22 T20G5.2 | ITPGILLEQGK                 | 31 | 1678   | 0.58 | 0.31 | 54 |
| 1 T20G5.2  | ITPGILLEQGK                 | 27 | 2139   | 0.59 | 0.15 | 26 |
| 22 T20G5.2 | SFRTEHGSTVVQNVNIDMIYGGMRSMK | 18 | 9734   | 0.59 | 0.12 | 20 |
| 22 T20G5.2 | SGQVVPGYGHAVLRK             | 26 | 154069 | 0.59 | 0.35 | 59 |
| 22 T20G5.2 | ITPGILLEQGK                 | 26 | 2929   | 0.60 | 0.13 | 22 |
| 7 T20G5.2  | FAGAYARGVAK                 | 35 | 2766   | 0.60 | 0.16 | 26 |
| 1 T20G5.2  | ITPGILLEQGK                 | 54 | 1932   | 0.60 | 0.17 | 29 |
| 7 T20G5.2  | HLPNDLDFK                   | 10 | 3396   | 0.62 | 0.08 | 14 |
| 22 T20G5.2 | ITPGILLEQGK                 | 49 | 3480   | 0.62 | 0.11 | 18 |
| 7 T20G5.2  | HLPNDLDFK                   | 40 | 6870   | 0.62 | 0.12 | 20 |
| 1 T20G5.2  | ITPGILLEQGK                 | 34 | 1282   | 0.62 | 0.12 | 18 |
| 7 T20G5.2  | ITPGILLEQGK                 | 29 | 1175   | 0.63 | 0.36 | 57 |
| 10 T20G5.2 | HLPNDLDFK                   | 10 | 10753  | 0.65 | 0.14 | 22 |
| 7 T20G5.2  | FAGAYARGVAK                 | 28 | 1292   | 0.65 | 0.18 | 28 |
| 7 T20G5.2  | HLPNDLDFK                   | 57 | 89154  | 0.66 | 0.13 | 19 |
| 1 T20G5.2  | LVSTLYK                     | 11 | 643    | 0.66 | 0.13 | 19 |
| 1 T20G5.2  | ITPGILLEQGK                 | 46 | 1759   | 0.66 | 0.10 | 15 |
| 22 T20G5.2 | ITPGILLEQGK                 | 37 | 2728   | 0.68 | 0.15 | 23 |
| 22 T20G5.2 | IVGEIGFNYTEEQLK             | 84 | 3679   | 0.68 | 0.16 | 24 |
| 7 T20G5.2  | FAGAYARGVAK                 | 27 | 1546   | 0.68 | 0.16 | 24 |
| 22 T20G5.2 | ITPGILLEQGK                 | 11 | 638    | 0.68 | 0.23 | 33 |
| 7 T20G5.2  | ITPGILLEQGK                 | 35 | 2328   | 0.68 | 0.31 | 45 |
| 1 T20G5.2  | SHSTDGLIK                   | 23 | 3431   | 0.68 | 0.11 | 16 |
| 22 T20G5.2 | FAGAYARGVAK                 | 35 | 6836   | 0.69 | 0.14 | 20 |
| 1 T20G5.2  | SHSTDGLIK                   | 17 | 4324   | 0.69 | 0.05 | 7  |
| 10 T20G5.2 | LVSTLYK                     | 10 | 718    | 0.69 | 0.22 | 31 |
| 7 T20G5.2  | HLPNDLDFK                   | 52 | 139872 | 0.70 | 0.12 | 17 |
| 7 T20G5.2  | FAGAYARGVAK                 | 41 | 1928   | 0.70 | 0.18 | 25 |
| 22 T20G5.2 | ITPGILLEQGK                 | 61 | 5240   | 0.70 | 0.13 | 18 |
| 7 T20G5.2  | SHSTDGLIK                   | 11 | 4907   | 0.70 | 0.09 | 12 |
| 10 T20G5.2 | ITPGILLEQGK                 | 39 | 2373   | 0.71 | 0.19 | 27 |
| 22 T20G5.2 | IVGEIGFNYTEEQLK             | 57 | 827    | 0.71 | 0.17 | 24 |
| 22 T20G5.2 | HLPNDLDFK                   | 20 | 10355  | 0.71 | 0.10 | 15 |
| 10 T20G5.2 | FAGAYARGVAK                 | 30 | 9532   | 0.71 | 0.09 | 13 |
| 7 T20G5.2  | SHSTDGLIK                   | 39 | 2929   | 0.71 | 0.15 | 21 |
| 22 T20G5.2 | LVSTLYK                     | 12 | 742    | 0.72 | 0.11 | 16 |
| 10 T20G5.2 | LVSTLYK                     | 16 | 873    | 0.72 | 0.17 | 23 |
| 7 T20G5.2  | HLPNDLDFK                   | 11 | 2209   | 0.72 | 0.24 | 33 |
| 22 T20G5.2 | FAGAYARGVAK                 | 45 | 114569 | 0.72 | 0.07 | 10 |
| 10 T20G5.2 | LVSTLYK                     | 22 | 800    | 0.72 | 0.33 | 45 |
| 7 T20G5.2  | FAGAYARGVAK                 | 24 | 2476   | 0.73 | 0.11 | 15 |
| 22 T20G5.2 | SGQVVPGYGHAVLRK             | 22 | 180777 | 0.73 | 0.06 | 8  |
| 7 T20G5.2  | ITPGILLEQGK                 | 40 | 2023   | 0.73 | 0.14 | 19 |
| 1 T20G5.2  | ITPGILLEQGK                 | 41 | 1277   | 0.73 | 0.14 | 19 |
| 7 T20G5.2  | HLPNDLDFK                   | 34 | 8322   | 0.74 | 0.17 | 23 |
| 1 T20G5.2  | ITPGILLEQGK                 | 32 | 2148   | 0.74 | 0.18 | 24 |
| 1 T20G5.2  | ITPGILLEQGK                 | 46 | 1220   | 0.74 | 0.12 | 16 |
| 1 T20G5.2  | LVSTLYK                     | 10 | 482    | 0.74 | 0.04 | 5  |
| 7 T20G5.2  | SHSTDGLIK                   | 13 | 4255   | 0.75 | 0.12 | 16 |
| 7 T20G5.2  | HLPNDLDFK                   | 11 | 1945   | 0.75 | 0.12 | 16 |
| 22 T20G5.2 | HLPNDLDFK                   | 15 | 24124  | 0.75 | 0.12 | 16 |
| 22 T20G5.2 | HLPNDLDFK                   | 22 | 26142  | 0.76 | 0.06 | 9  |
| 7 T20G5.2  | ITPGILLEQGK                 | 41 | 2548   | 0.76 | 0.14 | 18 |
| 22 T20G5.2 | ITPGILLEQGK                 | 26 | 2158   | 0.76 | 0.17 | 22 |
| 7 T20G5.2  | FAGAYARGVAK                 | 17 | 1107   | 0.76 | 0.13 | 17 |
| 10 T20G5.2 | ITPGILLEQGK                 | 30 | 3292   | 0.76 | 0.05 | 6  |
| 1 T20G5.2  | ITPGILLEQGK                 | 12 | 729    | 0.77 | 0.12 | 16 |

|            |                 |    |        |      |      |    |
|------------|-----------------|----|--------|------|------|----|
| 7 T20G5.2  | FAGAYARGVAK     | 33 | 1523   | 0.77 | 0.16 | 21 |
| 22 T20G5.2 | FAGAYARGVAK     | 53 | 128300 | 0.77 | 0.10 | 13 |
| 1 T20G5.2  | ITPGILLEQGK     | 28 | 941    | 0.77 | 0.14 | 18 |
| 1 T20G5.2  | ITPGILLEQGK     | 38 | 1394   | 0.79 | 0.17 | 21 |
| 1 T20G5.2  | ITPGILLEQGK     | 41 | 1235   | 0.79 | 0.09 | 12 |
| 22 T20G5.2 | ITPGILLEQGK     | 48 | 2151   | 0.79 | 0.15 | 19 |
| 22 T20G5.2 | HLPNDDLFFK      | 20 | 8395   | 0.80 | 0.27 | 34 |
| 7 T20G5.2  | ITPGILLEQGK     | 19 | 2208   | 0.81 | 0.09 | 12 |
| 10 T20G5.2 | ITPGILLEQGK     | 46 | 2112   | 0.81 | 0.15 | 19 |
| 7 T20G5.2  | ITPGILLEQGK     | 38 | 2262   | 0.81 | 0.10 | 12 |
| 10 T20G5.2 | ITPGILLEQGK     | 33 | 2153   | 0.81 | 0.13 | 16 |
| 7 T20G5.2  | LVSTLYK         | 30 | 2031   | 0.81 | 0.17 | 21 |
| 22 T20G5.2 | LALAAK          | 12 | 719    | 0.82 | 0.39 | 48 |
| 7 T20G5.2  | ITPGILLEQGK     | 28 | 1228   | 0.82 | 0.26 | 32 |
| 10 T20G5.2 | SHSTDGLIK       | 18 | 2826   | 0.82 | 0.13 | 16 |
| 7 T20G5.2  | ITPGILLEQGK     | 25 | 2964   | 0.82 | 0.12 | 15 |
| 22 T20G5.2 | ITPGILLEQGK     | 63 | 6130   | 0.82 | 0.15 | 18 |
| 22 T20G5.2 | FAGAYARGVAK     | 37 | 3281   | 0.83 | 0.11 | 14 |
| 22 T20G5.2 | ITPGILLEQGK     | 87 | 267434 | 0.83 | 0.12 | 14 |
| 22 T20G5.2 | ITPGILLEQGK     | 21 | 2396   | 0.84 | 0.37 | 44 |
| 22 T20G5.2 | ITPGILLEQGK     | 75 | 212000 | 0.84 | 0.06 | 7  |
| 7 T20G5.2  | SHSTDGLIK       | 19 | 2160   | 0.84 | 0.06 | 7  |
| 7 T20G5.2  | FAGAYARGVAK     | 36 | 4609   | 0.84 | 0.11 | 13 |
| 10 T20G5.2 | IVGEIGFNYTEEQLK | 39 | 1086   | 0.85 | 0.17 | 20 |
| 7 T20G5.2  | ITPGILLEQGK     | 29 | 2226   | 0.85 | 0.35 | 41 |
| 10 T20G5.2 | SHSTDGLIK       | 31 | 5410   | 0.85 | 0.09 | 11 |
| 7 T20G5.2  | SHSTDGLIK       | 30 | 3818   | 0.85 | 0.09 | 11 |
| 10 T20G5.2 | FAGAYARGVAK     | 35 | 1692   | 0.85 | 0.14 | 16 |
| 7 T20G5.2  | LVSTLYK         | 10 | 601    | 0.86 | 0.14 | 17 |
| 22 T20G5.2 | LVSTLYK         | 22 | 1242   | 0.86 | 0.20 | 24 |
| 7 T20G5.2  | ITPGILLEQGK     | 37 | 1964   | 0.86 | 0.15 | 18 |
| 7 T20G5.2  | SHSTDGLIK       | 33 | 2201   | 0.86 | 0.20 | 23 |
| 10 T20G5.2 | IVGEIGFNYTEEQLK | 55 | 1281   | 0.86 | 0.11 | 13 |
| 10 T20G5.2 | ITPGILLEQGK     | 46 | 3564   | 0.86 | 0.11 | 13 |
| 22 T20G5.2 | FAGAYARGVAK     | 45 | 2237   | 0.87 | 0.06 | 7  |
| 7 T20G5.2  | FAGAYARGVAK     | 30 | 1651   | 0.87 | 0.14 | 16 |
| 7 T20G5.2  | ITPGILLEQGK     | 48 | 5201   | 0.88 | 0.18 | 21 |
| 10 T20G5.2 | SHSTDGLIK       | 30 | 5441   | 0.88 | 0.08 | 9  |
| 22 T20G5.2 | ITPGILLEQGK     | 27 | 1866   | 0.88 | 0.14 | 16 |
| 1 T20G5.2  | HLPNDDLFFK      | 21 | 2915   | 0.88 | 0.19 | 22 |
| 7 T20G5.2  | ITPGILLEQGK     | 29 | 1557   | 0.88 | 0.12 | 14 |
| 10 T20G5.2 | ITPGILLEQGK     | 46 | 3100   | 0.90 | 0.18 | 20 |
| 7 T20G5.2  | ITPGILLEQGK     | 18 | 897    | 0.90 | 0.10 | 12 |
| 7 T20G5.2  | HLPNDDLFFK      | 12 | 1437   | 0.91 | 0.23 | 25 |
| 22 T20G5.2 | FAGAYARGVAK     | 11 | 1600   | 0.91 | 0.13 | 14 |
| 10 T20G5.2 | LVSTLYK         | 20 | 973    | 0.92 | 0.11 | 12 |
| 7 T20G5.2  | ITPGILLEQGK     | 47 | 3517   | 0.92 | 0.12 | 13 |
| 7 T20G5.2  | SHSTDGLIK       | 14 | 1308   | 0.92 | 0.10 | 11 |
| 7 T20G5.2  | SHSTDGLIK       | 55 | 43895  | 0.92 | 0.04 | 4  |
| 7 T20G5.2  | ITPGILLEQGK     | 37 | 2079   | 0.93 | 0.31 | 33 |
| 10 T20G5.2 | HLPNDDLFFK      | 10 | 7187   | 0.93 | 0.34 | 36 |
| 7 T20G5.2  | SHSTDGLIK       | 66 | 64630  | 0.94 | 0.07 | 7  |
| 7 T20G5.2  | SHSTDGLIK       | 21 | 1168   | 0.94 | 0.22 | 23 |
| 22 T20G5.2 | HLPNDDLFFK      | 16 | 42340  | 0.94 | 0.15 | 16 |
| 22 T20G5.2 | HLPNDDLFFK      | 34 | 57834  | 0.95 | 0.14 | 14 |
| 10 T20G5.2 | ITPGILLEQGK     | 46 | 2524   | 0.95 | 0.08 | 9  |
| 22 T20G5.2 | SGQVVPGYGHAVLRK | 43 | 5389   | 0.97 | 0.13 | 13 |
| 1 T20G5.2  | FAGAYARGVAK     | 26 | 2311   | 0.97 | 0.12 | 13 |
| 7 T20G5.2  | SHSTDGLIK       | 14 | 987    | 0.99 | 0.13 | 13 |
| 22 T20G5.2 | SHSTDGLIK       | 23 | 3769   | 0.99 | 0.08 | 9  |
| 7 T20G5.2  | ITPGILLEQGK     | 20 | 3570   | 0.99 | 0.11 | 11 |
| 1 T20G5.2  | ITPGILLEQGK     | 29 | 1412   | 0.99 | 0.24 | 24 |
| 7 T20G5.2  | SHSTDGLIK       | 16 | 1601   | 0.99 | 0.11 | 11 |
| 1 T20G5.2  | HLPNDDLFFK      | 34 | 13862  | 0.99 | 0.03 | 3  |
| 22 T20G5.2 | FAGAYARGVAK     | 22 | 2884   | 1.00 | 0.15 | 15 |
| 10 T20G5.2 | LVSTLYK         | 19 | 648    | 1.01 | 0.09 | 9  |
| 22 T20G5.2 | ITPGILLEQGK     | 19 | 1677   | 1.01 | 0.16 | 16 |
| 1 T20G5.2  | HLPNDDLFFK      | 34 | 18351  | 1.02 | 0.09 | 8  |
| 10 T20G5.2 | FAGAYARGVAK     | 39 | 10079  | 1.02 | 0.10 | 10 |
| 22 T20G5.2 | HLPNDDLFFK      | 12 | 10237  | 1.03 | 0.13 | 13 |
| 7 T20G5.2  | ITPGILLEQGK     | 45 | 2451   | 1.03 | 0.14 | 13 |
| 1 T20G5.2  | FAGAYARGVAK     | 41 | 1891   | 1.03 | 0.18 | 18 |
| 22 T20G5.2 | ITPGILLEQGK     | 49 | 2391   | 1.04 | 0.14 | 13 |
| 7 T20G5.2  | ITPGILLEQGK     | 32 | 3492   | 1.05 | 0.15 | 14 |
| 10 T20G5.2 | LVSTLYK         | 13 | 820    | 1.05 | 0.13 | 12 |
| 7 T20G5.2  | FAGAYARGVAK     | 32 | 6536   | 1.07 | 0.06 | 5  |
| 22 T20G5.2 | SGQVVPGYGHAVLRK | 65 | 22589  | 1.09 | 0.08 | 8  |
| 7 T20G5.2  | FAGAYARGVAK     | 44 | 6612   | 1.09 | 0.06 | 5  |
| 22 T20G5.2 | ITPGILLEQGK     | 15 | 2194   | 1.09 | 0.23 | 21 |
| 22 T20G5.2 | HLPNDDLFFK      | 23 | 10173  | 1.10 | 0.10 | 9  |
| 7 T20G5.2  | ITPGILLEQGK     | 47 | 3298   | 1.10 | 0.20 | 18 |
| 22 T20G5.2 | HLPNDDLFFK      | 13 | 8638   | 1.11 | 0.10 | 9  |
| 22 T20G5.2 | FAGAYARGVAK     | 27 | 1491   | 1.11 | 0.13 | 11 |
| 7 T20G5.2  | HLPNDDLFFK      | 41 | 26249  | 1.13 | 0.08 | 7  |
| 22 T20G5.2 | SHSTDGLIK       | 23 | 3610   | 1.13 | 0.07 | 6  |
| 22 T20G5.2 | HLPNDDLFFK      | 23 | 10424  | 1.13 | 0.08 | 7  |
| 7 T20G5.2  | SHSTDGLIK       | 63 | 53500  | 1.13 | 0.09 | 8  |
| 10 T20G5.2 | ITPGILLEQGK     | 43 | 3071   | 1.13 | 0.20 | 17 |
| 7 T20G5.2  | LVSTLYK         | 12 | 874    | 1.14 | 0.24 | 21 |
| 7 T20G5.2  | HLPNDDLFFK      | 13 | 9200   | 1.14 | 0.11 | 10 |
| 7 T20G5.2  | FAGAYARGVAK     | 27 | 2226   | 1.14 | 0.09 | 8  |
| 7 T20G5.2  | SHSTDGLIK       | 25 | 2998   | 1.14 | 0.16 | 14 |
| 22 T20G5.2 | SHSTDGLIK       | 17 | 7536   | 1.15 | 0.10 | 9  |
| 1 T20G5.2  | FAGAYARGVAK     | 30 | 3023   | 1.16 | 0.11 | 9  |
| 7 T20G5.2  | ITPGILLEQGK     | 44 | 3163   | 1.17 | 0.12 | 10 |
| 10 T20G5.2 | ITPGILLEQGK     | 62 | 4957   | 1.17 | 0.10 | 9  |
| 7 T20G5.2  | SHSTDGLIK       | 50 | 42480  | 1.18 | 0.10 | 9  |
| 22 T20G5.2 | FAGAYARGVAK     | 18 | 1802   | 1.19 | 0.15 | 13 |
| 10 T20G5.2 | FAGAYARGVAK     | 23 | 3280   | 1.19 | 0.11 | 9  |
| 22 T20G5.2 | SHSTDGLIK       | 50 | 8042   | 1.20 | 0.09 | 7  |
| 7 T20G5.2  | FAGAYARGVAK     | 18 | 2369   | 1.23 | 0.15 | 12 |

|             |                 |    |        |      |      |    |
|-------------|-----------------|----|--------|------|------|----|
| 22 T20G5.2  | SHSTDGLIK       | 57 | 162027 | 1.24 | 0.06 | 5  |
| 10 T20G5.2  | FAGAYARGVAK     | 21 | 1986   | 1.24 | 0.09 | 7  |
| 7 T20G5.2   | HLPNDDLFK       | 11 | 6801   | 1.24 | 0.10 | 8  |
| 1 T20G5.2   | ITPGILLEQGK     | 23 | 1002   | 1.26 | 0.10 | 8  |
| 7 T20G5.2   | FAGAYARGVAK     | 37 | 4249   | 1.26 | 0.10 | 8  |
| 10 T20G5.2  | SHSTDGLIK       | 31 | 5535   | 1.27 | 0.02 | 2  |
| 7 T20G5.2   | LVSTLYK         | 16 | 562    | 1.29 | 0.10 | 8  |
| 7 T20G5.2   | FAGAYARGVAK     | 45 | 3351   | 1.30 | 0.10 | 8  |
| 1 T20G5.2   | SHSTDGLIK       | 40 | 6520   | 1.31 | 0.10 | 8  |
| 22 T20G5.2  | FAGAYARGVAK     | 39 | 2346   | 1.31 | 0.15 | 12 |
| 7 T20G5.2   | HLPNDDLFK       | 34 | 20669  | 1.31 | 0.06 | 5  |
| 7 T20G5.2   | FAGAYARGVAK     | 17 | 959    | 1.31 | 0.13 | 10 |
| 22 T20G5.2  | SHSTDGLIK       | 38 | 230874 | 1.31 | 0.07 | 6  |
| 10 T20G5.2  | SHSTDGLIK       | 31 | 3682   | 1.32 | 0.09 | 7  |
| 7 T20G5.2   | FAGAYARGVAK     | 40 | 2671   | 1.34 | 0.09 | 7  |
| 22 T20G5.2  | SGQVVPGYGHAVLRK | 42 | 16827  | 1.34 | 0.16 | 12 |
| 22 T20G5.2  | LVSTLYK         | 16 | 829    | 1.35 | 0.23 | 17 |
| 22 T20G5.2  | SHSTDGLIK       | 14 | 3085   | 1.35 | 0.16 | 12 |
| 7 T20G5.2   | FAGAYARGVAK     | 24 | 2022   | 1.35 | 0.21 | 16 |
| 7 T20G5.2   | FAGAYARGVAK     | 23 | 1956   | 1.35 | 0.14 | 10 |
| 22 T20G5.2  | FAGAYARGVAK     | 21 | 3443   | 1.37 | 0.10 | 7  |
| 7 T20G5.2   | FAGAYARGVAK     | 41 | 8527   | 1.37 | 0.12 | 9  |
| 7 T20G5.2   | SHSTDGLIK       | 32 | 4149   | 1.38 | 0.15 | 11 |
| 10 T20G5.2  | ITPGILLEQGK     | 79 | 7063   | 1.39 | 0.14 | 10 |
| 7 T20G5.2   | HLPNDDLFK       | 21 | 7869   | 1.42 | 0.12 | 9  |
| 22 T20G5.2  | SGQVVPGYGHAVLRK | 21 | 87955  | 1.42 | 0.16 | 12 |
| 7 T20G5.2   | SHSTDGLIK       | 24 | 9560   | 1.43 | 0.10 | 7  |
| 7 T20G5.2   | FAGAYARGVAK     | 32 | 2224   | 1.44 | 0.08 | 6  |
| 7 T20G5.2   | SHSTDGLIK       | 20 | 3209   | 1.44 | 0.11 | 8  |
| 22 T20G5.2  | FAGAYARGVAK     | 33 | 1718   | 1.44 | 0.13 | 9  |
| 1 T20G5.2   | FAGAYARGVAK     | 29 | 1286   | 1.45 | 0.13 | 9  |
| 7 T20G5.2   | LVSTLYK         | 27 | 898    | 1.46 | 0.12 | 8  |
| 22 T20G5.2  | FAGAYARGVAK     | 18 | 1157   | 1.46 | 0.15 | 10 |
| 22 T20G5.2  | SHSTDGLIK       | 36 | 5801   | 1.48 | 0.06 | 4  |
| 22 T20G5.2  | LVSTLYK         | 17 | 845    | 1.48 | 0.21 | 14 |
| 1 T20G5.2   | FAGAYARGVAK     | 31 | 2319   | 1.50 | 0.09 | 6  |
| 7 T20G5.2   | SHSTDGLIK       | 24 | 3666   | 1.50 | 0.06 | 4  |
| 10 T20G5.2  | FAGAYARGVAK     | 17 | 1732   | 1.53 | 0.19 | 12 |
| 22 T20G5.2  | FAGAYARGVAK     | 25 | 2370   | 1.53 | 0.12 | 8  |
| 22 T20G5.2  | SHSTDGLIK       | 22 | 2402   | 1.57 | 0.10 | 6  |
| 1 T20G5.2   | SHSTDGLIK       | 24 | 4487   | 1.57 | 0.09 | 6  |
| 10 T20G5.2  | HLPNDDLFK       | 28 | 46178  | 1.58 | 0.10 | 6  |
| 7 T20G5.2   | SHSTDGLIK       | 20 | 5169   | 1.59 | 0.11 | 7  |
| 22 T20G5.2  | IVGEIGFNYTEEQLK | 75 | 1992   | 1.62 | 0.14 | 9  |
| 1 T20G5.2   | FAGAYARGVAK     | 16 | 1448   | 1.64 | 0.10 | 6  |
| 7 T20G5.2   | FAGAYARGVAK     | 26 | 1327   | 1.64 | 0.12 | 7  |
| 7 T20G5.2   | FAGAYARGVAK     | 12 | 1391   | 1.65 | 0.12 | 7  |
| 7 T20G5.2   | FAGAYARGVAK     | 12 | 772    | 1.66 | 0.11 | 7  |
| 22 T20G5.2  | HLPNDDLFK       | 25 | 537701 | 1.73 | 0.06 | 4  |
| 1 T20G5.2   | HLPNDDLFK       | 20 | 4499   | 1.74 | 0.04 | 2  |
| 10 T20G5.2  | FAGAYARGVAK     | 16 | 2334   | 1.74 | 0.15 | 9  |
| 7 T20G5.2   | FAGAYARGVAK     | 16 | 631    | 1.75 | 0.20 | 11 |
| 7 T20G5.2   | SHSTDGLIK       | 15 | 2236   | 1.76 | 0.09 | 5  |
| 10 T20G5.2  | FAGAYARGVAK     | 30 | 3909   | 1.76 | 0.07 | 4  |
| 22 T20G5.2  | FAGAYARGVAK     | 40 | 4453   | 1.77 | 0.11 | 6  |
| 22 T20G5.2  | IVGEIGFNYTEEQLK | 64 | 2485   | 1.81 | 0.10 | 5  |
| 7 T20G5.2   | SHSTDGLIK       | 12 | 1543   | 1.82 | 0.31 | 17 |
| 10 T20G5.2  | FAGAYARGVAK     | 35 | 2744   | 1.84 | 0.11 | 6  |
| 10 T20G5.2  | FAGAYARGVAK     | 18 | 3783   | 1.87 | 0.12 | 6  |
| 10 T20G5.2  | FAGAYARGVAK     | 16 | 4877   | 1.88 | 0.09 | 5  |
| 10 T20G5.2  | SHSTDGLIK       | 35 | 8593   | 1.88 | 0.08 | 4  |
| 22 T20G5.2  | ITPGILLEQGK     | 61 | 4191   | 1.90 | 0.12 | 6  |
| 22 T20G5.2  | SHSTDGLIK       | 12 | 2992   | 1.90 | 0.09 | 5  |
| 22 T20G5.2  | LVSTLYK         | 17 | 921    | 1.91 | 0.15 | 8  |
| 22 T20G5.2  | HLPNDDLFK       | 21 | 419373 | 1.93 | 0.02 | 1  |
| 22 T20G5.2  | SHSTDGLIK       | 13 | 3900   | 1.95 | 0.15 | 8  |
| 1 T20G5.2   | FAGAYARGVAK     | 25 | 2893   | 1.98 | 0.12 | 6  |
| 22 T20G5.2  | FAGAYARGVAK     | 43 | 3177   | 1.99 | 0.14 | 7  |
| 22 T20G5.2  | SHSTDGLIK       | 30 | 2412   | 2.06 | 0.17 | 8  |
| 10 T20G5.2  | FAGAYARGVAK     | 20 | 5370   | 2.06 | 0.24 | 12 |
| 10 T20G5.2  | ITPGILLEQGK     | 18 | 1094   | 2.10 | 0.20 | 10 |
| 10 T20G5.2  | SHSTDGLIK       | 36 | 8807   | 2.14 | 0.12 | 6  |
| 10 T20G5.2  | SHSTDGLIK       | 39 | 7277   | 2.24 | 0.06 | 3  |
| 10 T20G5.2  | SHSTDGLIK       | 34 | 9888   | 2.44 | 0.06 | 2  |
| 10 T20G5.2  | FAGAYARGVAK     | 28 | 5161   | 2.45 | 0.16 | 7  |
| 10 T20G5.2  | FAGAYARGVAK     | 14 | 3923   | 2.46 | 0.22 | 9  |
| 10 T20G5.2  | HLPNDDLFK       | 11 | 23933  | 2.52 | 0.31 | 12 |
| 22 T20G5.2  | SHSTDGLIK       | 31 | 22671  | 2.62 | 0.04 | 2  |
| 1 T20G5.2   | FAGAYARGVAK     | 33 | 2056   | 2.65 | 0.12 | 5  |
| 22 T20G5.2  | FAGAYARGVAK     | 43 | 8270   | 2.68 | 0.10 | 4  |
| 10 T20G5.2  | SHSTDGLIK       | 26 | 8440   | 2.68 | 0.05 | 2  |
| 10 T20G5.2  | SHSTDGLIK       | 41 | 7840   | 2.74 | 0.08 | 3  |
| 22 T20G5.2  | LALAAK          | 15 | 759    | 2.77 | 0.12 | 4  |
| 22 T20G5.2  | FAGAYARGVAK     | 41 | 12516  | 2.77 | 0.12 | 4  |
| 10 T20G5.2  | ITPGILLEQGK     | 83 | 21998  | 2.84 | 0.15 | 5  |
| 22 T20G5.2  | LALAAK          | 27 | 1233   | 2.95 | 0.10 | 3  |
| 10 T20G5.2  | FAGAYARGVAK     | 15 | 3245   | 3.00 | 0.08 | 3  |
| 22 T20G5.2  | SHSTDGLIK       | 27 | 16229  | 3.08 | 0.08 | 3  |
| 10 T20G5.2  | ITPGILLEQGK     | 67 | 20207  | 3.23 | 0.10 | 3  |
| 10 T20G5.2  | HLPNDDLFK       | 12 | 40706  | 3.55 | 0.13 | 4  |
| 10 T20G5.2  | SGQVVPGYGHAVLRK | 11 | 24855  | 3.78 | 0.08 | 2  |
| 10 T20G5.2  | IVGEIGFNYTEEQLK | 14 | 1024   | 4.36 | 0.11 | 3  |
| 10 T20G5.2  | SGQVVPGYGHAVLRK | 46 | 7617   | 4.64 | 0.15 | 3  |
| 10 T20G5.2  | SGQVVPGYGHAVLRK | 41 | 9208   | 5.14 | 0.10 | 2  |
| 10 T20G5.2  | SGQVVPGYGHAVLRK | 56 | 5950   | 5.76 | 0.13 | 2  |
| 10 T20G5.2  | SGQVVPGYGHAVLRK | 11 | 14784  | 6.05 | 0.40 | 7  |
| 10 T20G5.2  | FAGAYARGVAK     | 36 | 6522   | 8.95 | 0.12 | 1  |
| 10 T20G5.2  | FAGAYARGVAK     | 41 | 4738   | 9.13 | 0.19 | 2  |
| 22 T20H4.3a | SLLDEIHTAMYNK   | 57 | 2442   | 0.38 | 0.34 | 90 |
| 7 T20H4.3a  | QLSLEGLSK       | 45 | 811    | 0.42 | 0.12 | 29 |
| 7 T20H4.3a  | FNHWELK         | 20 | 3507   | 0.43 | 0.24 | 56 |

|                                  |                      |     |       |      |      |     |
|----------------------------------|----------------------|-----|-------|------|------|-----|
| 7 T20H4.3a                       | NQVTAVIRHNGEK        | 14  | 4551  | 0.47 | 0.14 | 29  |
| 1 T20H4.3a                       | QTLLGVGTK            | 33  | 832   | 0.48 | 0.12 | 24  |
| 7 T20H4.3a                       | GVPIRFEVGPNDLAK      | 12  | 861   | 0.49 | 0.05 | 11  |
| 10 T20H4.3a                      | QSLFDAVDK            | 17  | 1706  | 0.51 | 0.17 | 34  |
| 22 T20H4.3a                      | SLLDEIHTAMYNK        | 30  | 2324  | 0.56 | 0.16 | 28  |
| 7 T20H4.3a                       | NQVTAVIRHNGEK        | 13  | 3571  | 0.56 | 0.25 | 45  |
| 7 T20H4.3a                       | GVPIRFEVGPNDLAK      | 15  | 1418  | 0.58 | 0.13 | 23  |
| 22 T20H4.3a                      | SLLDEIHTAMYNK        | 66  | 2716  | 0.59 | 0.17 | 29  |
| 7 T20H4.3a                       | QSLLEGLSK            | 29  | 1524  | 0.60 | 0.25 | 43  |
| 22 T20H4.3a                      | FNHWELK              | 30  | 3134  | 0.62 | 0.23 | 38  |
| 22 T20H4.3a                      | QSLLEGLSK            | 45  | 4734  | 0.65 | 0.07 | 11  |
| 22 T20H4.3a                      | SLLDEIHTAMYNK        | 51  | 2588  | 0.65 | 0.19 | 30  |
| 7 T20H4.3a                       | QSLLEGLSK            | 28  | 937   | 0.67 | 0.24 | 36  |
| 22 T20H4.3a                      | SLLDEIHTAMYNK        | 40  | 2274  | 0.68 | 0.11 | 16  |
| 1 T20H4.3a                       | FNHWELK              | 30  | 2538  | 0.68 | 0.19 | 29  |
| 1 T20H4.3a                       | MFDISYEDPAK          | 38  | 2087  | 0.68 | 0.31 | 46  |
| 7 T20H4.3a                       | GVPIRFEVGPNDLAK      | 33  | 1660  | 0.70 | 0.38 | 55  |
| 10 T20H4.3a                      | QSLLEGLSK            | 70  | 6388  | 0.70 | 0.14 | 20  |
| 10 T20H4.3a                      | FNHWELK              | 44  | 5051  | 0.73 | 0.09 | 12  |
| 22 T20H4.3a                      | QSLLEGLSK            | 43  | 5825  | 0.75 | 0.14 | 18  |
| 22 T20H4.3a                      | FNHWELK              | 21  | 586   | 0.75 | 0.28 | 37  |
| 10 T20H4.3a                      | SLLDEIHTAMYNK        | 48  | 3045  | 0.78 | 0.08 | 10  |
| 1 T20H4.3a                       | GVPIRFEVGPNDLAK      | 10  | 3091  | 0.79 | 0.13 | 17  |
| 1 T20H4.3a                       | QSLLEGLSK            | 39  | 956   | 0.80 | 0.16 | 20  |
| 1 T20H4.3a                       | NQVTAVIRHNGEK        | 19  | 11668 | 0.83 | 0.15 | 18  |
| 10 T20H4.3a                      | SLLDEIHTAMYNK        | 74  | 2240  | 0.83 | 0.21 | 25  |
| 22 T20H4.3a                      | FNHWELK              | 49  | 8386  | 0.84 | 0.13 | 15  |
| 22 T20H4.3a                      | NQVTAVIRHNGEK        | 19  | 14829 | 0.87 | 0.13 | 15  |
| 10 T20H4.3a                      | FNHWELK              | 17  | 3003  | 0.87 | 0.12 | 14  |
| 10 T20H4.3a                      | FNHWELK              | 20  | 4359  | 0.88 | 0.19 | 21  |
| 22 T20H4.3a                      | FNHWELK              | 25  | 4522  | 0.89 | 0.10 | 11  |
| 22 T20H4.3a                      | GVPIRFEVGPNDLAK      | 33  | 4368  | 0.89 | 0.14 | 16  |
| 1 T20H4.3a                       | FNHWELK              | 19  | 1490  | 0.91 | 0.13 | 15  |
| 10 T20H4.3a                      | QSLLEGLSK            | 64  | 4567  | 0.92 | 0.17 | 18  |
| 22 T20H4.3a                      | VLAQRDShLK           | 15  | 33865 | 0.92 | 0.25 | 27  |
| 10 T20H4.3a                      | SLLDEIHTAMYNK        | 12  | 1851  | 0.92 | 0.06 | 6   |
| 22 T20H4.3a                      | NQVTAVIRHNGEK        | 13  | 29816 | 0.93 | 0.31 | 33  |
| 1 T20H4.3a                       | FNHWELK              | 35  | 2046  | 0.93 | 0.16 | 17  |
| 22 T20H4.3a                      | NQVTAVIRHNGEK        | 13  | 33431 | 0.94 | 0.10 | 10  |
| 22 T20H4.3a                      | FNHWELK              | 27  | 4515  | 0.95 | 0.11 | 12  |
| 1 T20H4.3a                       | NQVTAVIRHNGEK        | 20  | 10750 | 0.97 | 0.11 | 11  |
| 10 T20H4.3a                      | FNHWELK              | 32  | 4510  | 0.98 | 0.15 | 15  |
| 1 T20H4.3a                       | FNHWELK              | 31  | 1899  | 0.99 | 0.04 | 4   |
| 10 T20H4.3a                      | FNHWELK              | 41  | 4265  | 1.00 | 0.07 | 7   |
| 22 T20H4.3a                      | GVPIRFEVGPNDLAK      | 14  | 4969  | 1.00 | 0.13 | 13  |
| 22 T20H4.3a                      | QSLLEGLSK            | 30  | 1531  | 1.00 | 0.07 | 7   |
| 1 T20H4.3a                       | GVPIRFEVGPNDLAK      | 17  | 1429  | 1.01 | 0.17 | 17  |
| 22 T20H4.3a                      | GVPIRFEVGPNDLAK      | 34  | 3669  | 1.03 | 0.16 | 15  |
| 22 T20H4.3a                      | VLAQRDShLK           | 35  | 4455  | 1.03 | 0.14 | 14  |
| 22 T20H4.3a                      | FNHWELK              | 37  | 5976  | 1.04 | 0.16 | 16  |
| 10 T20H4.3a                      | VLAQRDShLK           | 11  | 58124 | 1.05 | 0.04 | 3   |
| 10 T20H4.3a                      | FNHWELK              | 25  | 2780  | 1.05 | 0.19 | 19  |
| 22 T20H4.3a                      | FNHWELK              | 35  | 3658  | 1.07 | 0.13 | 12  |
| 1 T20H4.3a                       | GVPIRFEVGPNDLAK      | 18  | 1334  | 1.07 | 0.13 | 12  |
| 1 T20H4.3a                       | SLLDEIHTAMYNK        | 32  | 1229  | 1.08 | 0.29 | 27  |
| 10 T20H4.3a                      | SLLDEIHTAMYNK        | 53  | 1778  | 1.09 | 0.25 | 23  |
| 7 T20H4.3a                       | GVPIRFEVGPNDLAK      | 14  | 1584  | 1.10 | 0.15 | 13  |
| 7 T20H4.3a                       | FNHWELK              | 10  | 3611  | 1.13 | 0.06 | 6   |
| 10 T20H4.3a                      | VLAQRDShLK           | 10  | 52353 | 1.16 | 0.15 | 13  |
| 10 T20H4.3a                      | QSLLEGLSK            | 15  | 1390  | 1.18 | 0.17 | 14  |
| 1 T20H4.3a                       | GVPIRFEVGPNDLAK      | 25  | 1638  | 1.28 | 0.14 | 11  |
| 22 T20H4.3a                      | FNHWELK              | 34  | 3140  | 1.28 | 0.13 | 10  |
| 22 T20H4.3a                      | GVPIRFEVGPNDLAK      | 32  | 4545  | 1.30 | 0.13 | 10  |
| 1 T20H4.3a                       | GVPIRFEVGPNDLAK      | 41  | 1886  | 1.35 | 0.12 | 9   |
| 10 T20H4.3a                      | GVPIRFEVGPNDLAK      | 10  | 10008 | 1.41 | 0.06 | 4   |
| 10 T20H4.3a                      | GVPIRFEVGPNDLAK      | 21  | 4530  | 1.41 | 0.08 | 5   |
| 10 T20H4.3a                      | GVPIRFEVGPNDLAK      | 23  | 5715  | 1.41 | 0.08 | 6   |
| 1 T20H4.3a                       | FNHWELK              | 17  | 1293  | 1.45 | 0.28 | 19  |
| 22 T20H4.3a                      | SLLDEIHTAMYNK        | 55  | 3351  | 1.52 | 0.13 | 8   |
| 22 T20H4.3a                      | SLLDEIHTAMYNK        | 59  | 3325  | 1.57 | 0.10 | 7   |
| 22 T20H4.3a                      | QSLLEGLSK            | 29  | 1575  | 1.60 | 0.11 | 7   |
| 10 T20H4.3a                      | QSLLEGLSK            | 37  | 2143  | 1.61 | 0.23 | 14  |
| 1 T20H4.3a                       | QTLLGVGTK            | 21  | 842   | 1.69 | 0.38 | 23  |
| 7 T20H4.3a                       | FNHWELK              | 12  | 2933  | 1.73 | 0.44 | 25  |
| 10 T20H4.3a                      | QSLFDAVDK            | 18  | 2787  | 1.81 | 0.06 | 3   |
| 10 T20H4.3a                      | QSLLEGLSK            | 45  | 2256  | 1.86 | 0.22 | 12  |
| 10 T20H4.3a                      | FNHWELK              | 22  | 5248  | 1.88 | 0.10 | 5   |
| 1 T20H4.3a                       | GVPIRFEVGPNDLAK      | 50  | 2344  | 1.90 | 0.15 | 8   |
| 22 T20H4.3a                      | GVPIRFEVGPNDLAK      | 22  | 5433  | 1.94 | 0.12 | 6   |
| 10 T20H4.3a                      | FNHWELK              | 11  | 3454  | 1.95 | 0.11 | 6   |
| 22 T20H4.3a                      | GVPIRFEVGPNDLAK      | 13  | 3913  | 1.95 | 0.04 | 2   |
| 10 T20H4.3a                      | QSLFDAVDK            | 22  | 2409  | 2.05 | 0.11 | 5   |
| 22 T20H4.3a                      | QSLFDAVDK            | 29  | 2527  | 2.06 | 0.13 | 6   |
| 1 T20H4.3a                       | FNHWELK              | 23  | 2079  | 2.08 | 0.07 | 3   |
| 22 T20H4.3a                      | QSLFDAVDK            | 32  | 3633  | 2.11 | 0.06 | 3   |
| 10 T20H4.3a                      | FNHWELK              | 39  | 3271  | 2.16 | 0.11 | 5   |
| 22 T20H4.3a                      | QSLLEGLSK            | 17  | 1316  | 2.18 | 0.08 | 3   |
| 22 T20H4.3a                      | FNHWELK              | 22  | 3777  | 2.21 | 0.19 | 9   |
| 22 T20H4.3a                      | FNHWELK              | 21  | 3442  | 2.39 | 0.06 | 3   |
| 10 T20H4.3a                      | FNHWELK              | 24  | 3268  | 2.39 | 0.11 | 4   |
| 1 T20H4.3a                       | VLAQRDShLK           | 12  | 5085  | 5.90 | 0.10 | 2   |
| 10 T21B10.2c;T21B10.2a;T21B10.2b | YIAELAGTGK           | 45  | 48363 | 0.04 | 0.28 | 675 |
| 10 T21B10.2c;T21B10.2a;T21B10.2b | FHGATSIQLVGDDLTVTNPK | 53  | 52999 | 0.05 | 0.24 | 486 |
| 10 T21B10.2c;T21B10.2a;T21B10.2b | YIAELAGTGK           | 61  | 8420  | 0.05 | 0.28 | 560 |
| 10 T21B10.2c;T21B10.2a;T21B10.2b | FHGATSIQLVGDDLTVTNPK | 120 | 6762  | 0.05 | 0.29 | 552 |
| 10 T21B10.2c;T21B10.2a;T21B10.2b | RIQTAIDK             | 31  | 6789  | 0.06 | 0.36 | 646 |
| 10 T21B10.2c;T21B10.2a;T21B10.2b | FHGATSIQLVGDDLTVTNPK | 63  | 28718 | 0.08 | 0.06 | 72  |
| 10 T21B10.2c;T21B10.2a;T21B10.2b | FHGATSIQLVGDDLTVTNPK | 131 | 8709  | 0.08 | 0.22 | 272 |
| 10 T21B10.2c;T21B10.2a;T21B10.2b | ISIGMDVAASEFFK       | 31  | 3180  | 0.09 | 0.16 | 176 |
| 10 T21B10.2c;T21B10.2a;T21B10.2b | YIAELAGTGK           | 48  | 11737 | 0.10 | 0.21 | 209 |
| 10 T21B10.2c;T21B10.2a;T21B10.2b | FHGATSIQLVGDDLTVTNPK | 54  | 40739 | 0.10 | 0.30 | 294 |

|    |                               |                            |     |        |      |      |     |
|----|-------------------------------|----------------------------|-----|--------|------|------|-----|
| 10 | T21B10.2c;T21B10.2a;T21B10.2b | ISIGMDVAASEFFK             | 54  | 2230   | 0.20 | 0.14 | 72  |
| 7  | T21B10.2c;T21B10.2a;T21B10.2b | GFDVTAQK                   | 58  | 102576 | 0.21 | 0.20 | 97  |
| 7  | T21B10.2c;T21B10.2a;T21B10.2b | GFDVTAQK                   | 48  | 40468  | 0.23 | 0.16 | 66  |
| 7  | T21B10.2c;T21B10.2a;T21B10.2b | AVHLGK                     | 30  | 17273  | 0.24 | 0.08 | 33  |
| 10 | T21B10.2c;T21B10.2a;T21B10.2b | FHGATSIQLVGDDLTVTNPK       | 49  | 16012  | 0.25 | 0.54 | 219 |
| 7  | T21B10.2c;T21B10.2a;T21B10.2b | AVHLGK                     | 28  | 7292   | 0.25 | 0.08 | 31  |
| 10 | T21B10.2c;T21B10.2a;T21B10.2b | DIDDFMMALDGSENK            | 56  | 676    | 0.25 | 0.23 | 92  |
| 10 | T21B10.2c;T21B10.2a;T21B10.2b | GNLGANAILGVSLAVAK          | 122 | 2505   | 0.30 | 0.13 | 44  |
| 10 | T21B10.2c;T21B10.2a;T21B10.2b | ISIGMDVAASEFFK             | 76  | 1850   | 0.32 | 0.15 | 47  |
| 22 | T21B10.2c;T21B10.2a;T21B10.2b | EGLDLLNTAIDK               | 17  | 3963   | 0.32 | 0.19 | 59  |
| 7  | T21B10.2c;T21B10.2a;T21B10.2b | VNQIGSVTESIEAAK            | 85  | 3828   | 0.34 | 0.12 | 34  |
| 22 | T21B10.2c;T21B10.2a;T21B10.2b | DIDDFMMALDGSENK            | 58  | 2492   | 0.34 | 0.10 | 30  |
| 10 | T21B10.2c;T21B10.2a;T21B10.2b | GNLGANAILGVSLAVAK          | 118 | 3247   | 0.35 | 0.09 | 26  |
| 7  | T21B10.2c;T21B10.2a;T21B10.2b | YIAELAGTGK                 | 27  | 2348   | 0.35 | 0.15 | 42  |
| 22 | T21B10.2c;T21B10.2a;T21B10.2b | VNQIGSVTESIEAAK            | 91  | 6796   | 0.35 | 0.15 | 44  |
| 10 | T21B10.2c;T21B10.2a;T21B10.2b | RYGLDATAVGDEGGFAPNIQDNK    | 46  | 5806   | 0.35 | 0.15 | 44  |
| 10 | T21B10.2c;T21B10.2a;T21B10.2b | DIDDFMMALDGSENK            | 71  | 1190   | 0.35 | 0.19 | 54  |
| 10 | T21B10.2c;T21B10.2a;T21B10.2b | VVLPVPAPFN VingGSHAGNK     | 12  | 2570   | 0.37 | 0.26 | 71  |
| 7  | T21B10.2c;T21B10.2a;T21B10.2b | AVHLGK                     | 13  | 2415   | 0.37 | 0.09 | 26  |
| 10 | T21B10.2c;T21B10.2a;T21B10.2b | DIDDFMMALDGSENK            | 59  | 3052   | 0.37 | 0.12 | 32  |
| 10 | T21B10.2c;T21B10.2a;T21B10.2b | GNLGANAILGVSLAVAK          | 125 | 2247   | 0.38 | 0.17 | 44  |
| 22 | T21B10.2c;T21B10.2a;T21B10.2b | DIDDFMMALDGSENK            | 64  | 2954   | 0.38 | 0.13 | 36  |
| 22 | T21B10.2c;T21B10.2a;T21B10.2b | DIDDFMMALDGSENK            | 72  | 2796   | 0.38 | 0.14 | 38  |
| 10 | T21B10.2c;T21B10.2a;T21B10.2b | IHARQIYDSRGNPTEVDLFTEK     | 19  | 9741   | 0.38 | 0.90 | 235 |
| 10 | T21B10.2c;T21B10.2a;T21B10.2b | VNQIGSVTESIEAAK            | 25  | 2576   | 0.39 | 0.26 | 66  |
| 22 | T21B10.2c;T21B10.2a;T21B10.2b | IHARQIYDSRGNPTEVDLFTEK     | 18  | 2715   | 0.40 | 0.16 | 39  |
| 10 | T21B10.2c;T21B10.2a;T21B10.2b | DIDDFMMALDGSENK            | 72  | 2200   | 0.40 | 0.17 | 42  |
| 22 | T21B10.2c;T21B10.2a;T21B10.2b | DIDDFMMALDGSENK            | 57  | 851    | 0.42 | 0.14 | 33  |
| 7  | T21B10.2c;T21B10.2a;T21B10.2b | YIAELAGTGK                 | 26  | 1739   | 0.42 | 0.12 | 30  |
| 7  | T21B10.2c;T21B10.2a;T21B10.2b | IAPALIAK                   | 11  | 4473   | 0.43 | 0.24 | 56  |
| 22 | T21B10.2c;T21B10.2a;T21B10.2b | DIDDFMMALDGSENK            | 67  | 2683   | 0.43 | 0.19 | 45  |
| 22 | T21B10.2c;T21B10.2a;T21B10.2b | VNQIGSVTESIEAAK            | 90  | 4167   | 0.44 | 0.14 | 32  |
| 10 | T21B10.2c;T21B10.2a;T21B10.2b | GFDVTAQK                   | 57  | 88190  | 0.44 | 0.04 | 10  |
| 22 | T21B10.2c;T21B10.2a;T21B10.2b | DIDDFMMALDGSENK            | 80  | 2548   | 0.45 | 0.12 | 27  |
| 10 | T21B10.2c;T21B10.2a;T21B10.2b | ISIGMDVAASEFFK             | 33  | 1338   | 0.45 | 0.15 | 34  |
| 1  | T21B10.2c;T21B10.2a;T21B10.2b | YIAELAGTGK                 | 42  | 6317   | 0.46 | 0.08 | 18  |
| 7  | T21B10.2c;T21B10.2a;T21B10.2b | RYGLDATAVGDEGGFAPNIQDNK    | 99  | 24175  | 0.46 | 0.10 | 23  |
| 7  | T21B10.2c;T21B10.2a;T21B10.2b | DIDDFMMALDGSENK            | 53  | 2034   | 0.47 | 0.13 | 28  |
| 7  | T21B10.2c;T21B10.2a;T21B10.2b | YIAELAGTGK                 | 24  | 2963   | 0.47 | 0.08 | 18  |
| 10 | T21B10.2c;T21B10.2a;T21B10.2b | VNQIGSVTESIEAAK            | 73  | 3248   | 0.47 | 0.23 | 50  |
| 1  | T21B10.2c;T21B10.2a;T21B10.2b | GFDVTAQK                   | 74  | 81285  | 0.47 | 0.07 | 16  |
| 10 | T21B10.2c;T21B10.2a;T21B10.2b | DIDDFMMALDGSENK            | 66  | 1078   | 0.48 | 0.18 | 38  |
| 10 | T21B10.2c;T21B10.2a;T21B10.2b | DIDDFMMALDGSENK            | 65  | 2797   | 0.48 | 0.14 | 29  |
| 10 | T21B10.2c;T21B10.2a;T21B10.2b | ISIGMDVAASEFFK             | 42  | 1120   | 0.48 | 0.14 | 28  |
| 10 | T21B10.2c;T21B10.2a;T21B10.2b | YIAELAGTGK                 | 44  | 3554   | 0.48 | 0.13 | 27  |
| 10 | T21B10.2c;T21B10.2a;T21B10.2b | GNLGANAILGVSLAVAK          | 109 | 1624   | 0.48 | 0.13 | 27  |
| 7  | T21B10.2c;T21B10.2a;T21B10.2b | EGLDLLNTAIDK               | 84  | 5642   | 0.48 | 0.10 | 20  |
| 1  | T21B10.2c;T21B10.2a;T21B10.2b | EGLDLLNTAIDK               | 31  | 795    | 0.49 | 0.26 | 53  |
| 1  | T21B10.2c;T21B10.2a;T21B10.2b | IAPALIAK                   | 28  | 12329  | 0.49 | 0.15 | 31  |
| 10 | T21B10.2c;T21B10.2a;T21B10.2b | FHGATSIQLVGDDLTVTNPK       | 29  | 3049   | 0.49 | 0.11 | 22  |
| 1  | T21B10.2c;T21B10.2a;T21B10.2b | GFDVTAQK                   | 67  | 71369  | 0.49 | 0.10 | 21  |
| 1  | T21B10.2c;T21B10.2a;T21B10.2b | IAPALIAK                   | 21  | 7549   | 0.49 | 0.09 | 18  |
| 7  | T21B10.2c;T21B10.2a;T21B10.2b | IAPALIAK                   | 10  | 4656   | 0.49 | 0.07 | 15  |
| 7  | T21B10.2c;T21B10.2a;T21B10.2b | ISIGMDVAASEFFK             | 29  | 1219   | 0.50 | 0.26 | 52  |
| 10 | T21B10.2c;T21B10.2a;T21B10.2b | FHGATSIQLVGDDLTVTNPK       | 31  | 3324   | 0.50 | 0.09 | 17  |
| 22 | T21B10.2c;T21B10.2a;T21B10.2b | GVFRAAVPSGASTGVHEALELRDGDK | 26  | 19837  | 0.50 | 0.14 | 27  |
| 10 | T21B10.2c;T21B10.2a;T21B10.2b | EGLDLLNTAIDK               | 98  | 34670  | 0.50 | 0.07 | 13  |
| 7  | T21B10.2c;T21B10.2a;T21B10.2b | VNQIGSVTESIEAAK            | 76  | 2910   | 0.50 | 0.09 | 19  |
| 10 | T21B10.2c;T21B10.2a;T21B10.2b | GFDVTAQK                   | 65  | 109412 | 0.50 | 0.05 | 10  |
| 7  | T21B10.2c;T21B10.2a;T21B10.2b | EGLDLLNTAIDK               | 26  | 1721   | 0.50 | 0.41 | 82  |
| 22 | T21B10.2c;T21B10.2a;T21B10.2b | DIDDFMMALDGSENK            | 57  | 1629   | 0.51 | 0.14 | 28  |
| 7  | T21B10.2c;T21B10.2a;T21B10.2b | EGLDLLNTAIDK               | 86  | 5450   | 0.52 | 0.09 | 18  |
| 22 | T21B10.2c;T21B10.2a;T21B10.2b | GVFRAAVPSGASTGVHEALELRDGDK | 20  | 21244  | 0.52 | 0.21 | 41  |
| 10 | T21B10.2c;T21B10.2a;T21B10.2b | EGLDLLNTAIDK               | 102 | 37369  | 0.52 | 0.10 | 18  |
| 10 | T21B10.2c;T21B10.2a;T21B10.2b | IHARQIYDSRGNPTEVDLFTEK     | 14  | 5665   | 0.52 | 0.13 | 25  |
| 10 | T21B10.2c;T21B10.2a;T21B10.2b | YIAELAGTGK                 | 52  | 10759  | 0.53 | 0.18 | 35  |
| 22 | T21B10.2c;T21B10.2a;T21B10.2b | YIAELAGTGK                 | 54  | 9752   | 0.53 | 0.12 | 22  |
| 10 | T21B10.2c;T21B10.2a;T21B10.2b | VNQIGSVTESIEAAK            | 105 | 5861   | 0.53 | 0.18 | 34  |
| 10 | T21B10.2c;T21B10.2a;T21B10.2b | YIAELAGTGK                 | 47  | 8825   | 0.54 | 0.10 | 19  |
| 7  | T21B10.2c;T21B10.2a;T21B10.2b | YIAELAGTGK                 | 11  | 1032   | 0.54 | 0.07 | 14  |
| 22 | T21B10.2c;T21B10.2a;T21B10.2b | YIAELAGTGK                 | 20  | 1766   | 0.54 | 0.53 | 98  |
| 7  | T21B10.2c;T21B10.2a;T21B10.2b | YIAELAGTGK                 | 40  | 6497   | 0.54 | 0.12 | 22  |
| 10 | T21B10.2c;T21B10.2a;T21B10.2b | FHGATSIQLVGDDLTVTNPK       | 36  | 5739   | 0.54 | 0.17 | 32  |
| 22 | T21B10.2c;T21B10.2a;T21B10.2b | YIAELAGTGK                 | 46  | 9499   | 0.54 | 0.15 | 27  |
| 7  | T21B10.2c;T21B10.2a;T21B10.2b | VVLPVPAPFN VingGSHAGNK     | 13  | 12054  | 0.55 | 0.07 | 12  |
| 1  | T21B10.2c;T21B10.2a;T21B10.2b | YIAELAGTGK                 | 56  | 6559   | 0.55 | 0.11 | 19  |
| 22 | T21B10.2c;T21B10.2a;T21B10.2b | RYGLDATAVGDEGGFAPNIQDNK    | 33  | 4349   | 0.55 | 0.10 | 18  |
| 7  | T21B10.2c;T21B10.2a;T21B10.2b | GVFRAAVPSGASTGVHEALELRDGDK | 12  | 32839  | 0.55 | 0.13 | 23  |
| 1  | T21B10.2c;T21B10.2a;T21B10.2b | GLPLYK                     | 28  | 22139  | 0.55 | 0.20 | 37  |
| 1  | T21B10.2c;T21B10.2a;T21B10.2b | YIAELAGTGK                 | 26  | 484    | 0.56 | 0.16 | 29  |
| 1  | T21B10.2c;T21B10.2a;T21B10.2b | EGLDLLNTAIDK               | 47  | 579    | 0.57 | 0.13 | 23  |
| 10 | T21B10.2c;T21B10.2a;T21B10.2b | DIDDFMMALDGSENK            | 62  | 2351   | 0.57 | 0.11 | 19  |
| 10 | T21B10.2c;T21B10.2a;T21B10.2b | DIDDFMMALDGSENK            | 44  | 919    | 0.58 | 0.08 | 13  |
| 7  | T21B10.2c;T21B10.2a;T21B10.2b | YIAELAGTGK                 | 67  | 108064 | 0.58 | 0.04 | 7   |
| 22 | T21B10.2c;T21B10.2a;T21B10.2b | AVHLGK                     | 21  | 2771   | 0.58 | 0.11 | 19  |
| 10 | T21B10.2c;T21B10.2a;T21B10.2b | YIAELAGTGK                 | 29  | 3134   | 0.58 | 0.22 | 38  |
| 7  | T21B10.2c;T21B10.2a;T21B10.2b | YIAELAGTGK                 | 34  | 5250   | 0.59 | 0.08 | 14  |
| 10 | T21B10.2c;T21B10.2a;T21B10.2b | YIAELAGTGK                 | 43  | 4551   | 0.59 | 0.14 | 24  |
| 7  | T21B10.2c;T21B10.2a;T21B10.2b | RIQTAIDK                   | 53  | 35651  | 0.59 | 0.08 | 14  |
| 22 | T21B10.2c;T21B10.2a;T21B10.2b | YIAELAGTGK                 | 31  | 3422   | 0.60 | 0.10 | 17  |
| 10 | T21B10.2c;T21B10.2a;T21B10.2b | YIAELAGTGK                 | 32  | 4408   | 0.60 | 0.22 | 37  |
| 22 | T21B10.2c;T21B10.2a;T21B10.2b | IHARQIYDSRGNPTEVDLFTEK     | 16  | 2135   | 0.61 | 0.37 | 62  |
| 7  | T21B10.2c;T21B10.2a;T21B10.2b | YIAELAGTGK                 | 35  | 1482   | 0.61 | 0.13 | 20  |
| 22 | T21B10.2c;T21B10.2a;T21B10.2b | EGLDLLNTAIDK               | 122 | 58560  | 0.62 | 0.05 | 7   |
| 1  | T21B10.2c;T21B10.2a;T21B10.2b | YIAELAGTGK                 | 28  | 713    | 0.62 | 0.21 | 33  |
| 1  | T21B10.2c;T21B10.2a;T21B10.2b | RYGLDATAVGDEGGFAPNIQDNK    | 54  | 5203   | 0.62 | 0.27 | 43  |
| 7  | T21B10.2c;T21B10.2a;T21B10.2b | YIAELAGTGK                 | 23  | 2802   | 0.62 | 0.13 | 21  |
| 1  | T21B10.2c;T21B10.2a;T21B10.2b | YIAELAGTGK                 | 11  | 664    | 0.62 | 0.18 | 29  |
| 7  | T21B10.2c;T21B10.2a;T21B10.2b | YIAELAGTGK                 | 12  | 1181   | 0.63 | 0.35 | 55  |
| 7  | T21B10.2c;T21B10.2a;T21B10.2b | YIAELAGTGK                 | 46  | 2668   | 0.64 | 0.13 | 21  |
| 7  | T21B10.2c;T21B10.2a;T21B10.2b | YIAELAGTGK                 | 63  | 91244  | 0.64 | 0.10 | 15  |

|    |                               |                            |     |        |      |      |    |
|----|-------------------------------|----------------------------|-----|--------|------|------|----|
| 10 | T21B10.2c;T21B10.2a;T21B10.2b | GVFRAAVPSGASTGVHEALELRDGDK | 23  | 138524 | 0.64 | 0.10 | 16 |
| 22 | T21B10.2c;T21B10.2a;T21B10.2b | RYGLDATAVGDEGGFAPNIQDNK    | 92  | 14553  | 0.64 | 0.10 | 15 |
| 22 | T21B10.2c;T21B10.2a;T21B10.2b | YIAELAGTGK                 | 30  | 3750   | 0.64 | 0.19 | 29 |
| 10 | T21B10.2c;T21B10.2a;T21B10.2b | IHARQIYDSRGNPTVEVDLFTEK    | 15  | 5370   | 0.65 | 0.12 | 19 |
| 22 | T21B10.2c;T21B10.2a;T21B10.2b | DIDDFMMALDGSSENK           | 69  | 858    | 0.65 | 0.16 | 24 |
| 22 | T21B10.2c;T21B10.2a;T21B10.2b | YIAELAGTGK                 | 40  | 3118   | 0.65 | 0.18 | 27 |
| 22 | T21B10.2c;T21B10.2a;T21B10.2b | EGLDLLNTAIDK               | 116 | 54376  | 0.66 | 0.10 | 15 |
| 7  | T21B10.2c;T21B10.2a;T21B10.2b | IAPALIAK                   | 38  | 37467  | 0.67 | 0.10 | 15 |
| 7  | T21B10.2c;T21B10.2a;T21B10.2b | YIAELAGTGK                 | 16  | 1473   | 0.67 | 0.26 | 38 |
| 10 | T21B10.2c;T21B10.2a;T21B10.2b | EGLDLLNTAIDK               | 24  | 3072   | 0.68 | 0.24 | 35 |
| 10 | T21B10.2c;T21B10.2a;T21B10.2b | VVLPVPAFNVINGGSHAGNK       | 58  | 5317   | 0.69 | 0.12 | 18 |
| 7  | T21B10.2c;T21B10.2a;T21B10.2b | YIAELAGTGK                 | 12  | 1173   | 0.70 | 0.19 | 27 |
| 22 | T21B10.2c;T21B10.2a;T21B10.2b | IAPALIAK                   | 22  | 12109  | 0.70 | 0.07 | 10 |
| 7  | T21B10.2c;T21B10.2a;T21B10.2b | RIQTAIDK                   | 55  | 17759  | 0.71 | 0.11 | 15 |
| 10 | T21B10.2c;T21B10.2a;T21B10.2b | VVLPVPAFNVINGGSHAGNK       | 37  | 5190   | 0.71 | 0.09 | 13 |
| 7  | T21B10.2c;T21B10.2a;T21B10.2b | YIAELAGTGK                 | 15  | 2379   | 0.71 | 0.15 | 21 |
| 1  | T21B10.2c;T21B10.2a;T21B10.2b | EGLDLLNTAIDK               | 106 | 41705  | 0.71 | 0.11 | 16 |
| 7  | T21B10.2c;T21B10.2a;T21B10.2b | ISIGMDVAASEFFK             | 45  | 1811   | 0.72 | 0.14 | 19 |
| 10 | T21B10.2c;T21B10.2a;T21B10.2b | IHARQIYDSRGNPTVEVDLFTEK    | 12  | 1398   | 0.72 | 0.07 | 10 |
| 7  | T21B10.2c;T21B10.2a;T21B10.2b | YIAELAGTGK                 | 12  | 722    | 0.72 | 0.24 | 33 |
| 10 | T21B10.2c;T21B10.2a;T21B10.2b | EGLDLLNTAIDK               | 38  | 3411   | 0.72 | 0.29 | 40 |
| 22 | T21B10.2c;T21B10.2a;T21B10.2b | IAPALIAK                   | 29  | 10043  | 0.73 | 0.07 | 9  |
| 10 | T21B10.2c;T21B10.2a;T21B10.2b | IHARQIYDSRGNPTVEVDLFTEK    | 27  | 10799  | 0.73 | 0.11 | 15 |
| 10 | T21B10.2c;T21B10.2a;T21B10.2b | IHARQIYDSRGNPTVEVDLFTEK    | 20  | 7447   | 0.74 | 0.13 | 18 |
| 7  | T21B10.2c;T21B10.2a;T21B10.2b | RYGLDATAVGDEGGFAPNIQDNK    | 70  | 7669   | 0.74 | 0.18 | 24 |
| 1  | T21B10.2c;T21B10.2a;T21B10.2b | YIAELAGTGK                 | 27  | 2248   | 0.75 | 0.12 | 16 |
| 22 | T21B10.2c;T21B10.2a;T21B10.2b | GFDVTAQK                   | 58  | 64679  | 0.75 | 0.06 | 8  |
| 10 | T21B10.2c;T21B10.2a;T21B10.2b | FHGATSIQLVGDDLTVTNPK       | 139 | 12570  | 0.75 | 0.11 | 14 |
| 22 | T21B10.2c;T21B10.2a;T21B10.2b | GFDVTAQK                   | 60  | 96301  | 0.76 | 0.06 | 8  |
| 7  | T21B10.2c;T21B10.2a;T21B10.2b | YIAELAGTGK                 | 39  | 3457   | 0.76 | 0.15 | 19 |
| 10 | T21B10.2c;T21B10.2a;T21B10.2b | EGLDLLNTAIDK               | 22  | 2155   | 0.76 | 0.19 | 25 |
| 22 | T21B10.2c;T21B10.2a;T21B10.2b | GFDVTAQK                   | 44  | 48626  | 0.76 | 0.05 | 7  |
| 1  | T21B10.2c;T21B10.2a;T21B10.2b | EGLDLLNTAIDK               | 108 | 38695  | 0.77 | 0.08 | 10 |
| 10 | T21B10.2c;T21B10.2a;T21B10.2b | IAPALIAK                   | 43  | 94100  | 0.78 | 0.04 | 6  |
| 1  | T21B10.2c;T21B10.2a;T21B10.2b | YIAELAGTGK                 | 17  | 767    | 0.78 | 0.24 | 31 |
| 1  | T21B10.2c;T21B10.2a;T21B10.2b | YIAELAGTGK                 | 35  | 1104   | 0.78 | 0.18 | 23 |
| 10 | T21B10.2c;T21B10.2a;T21B10.2b | GVFRAAVPSGASTGVHEALELRDGDK | 26  | 88320  | 0.79 | 0.11 | 14 |
| 7  | T21B10.2c;T21B10.2a;T21B10.2b | DIDDFMMALDGSSENK           | 62  | 2276   | 0.79 | 0.11 | 14 |
| 7  | T21B10.2c;T21B10.2a;T21B10.2b | GVFRAAVPSGASTGVHEALELRDGDK | 16  | 5959   | 0.79 | 0.10 | 13 |
| 22 | T21B10.2c;T21B10.2a;T21B10.2b | GFDVTAQK                   | 57  | 98716  | 0.79 | 0.03 | 4  |
| 22 | T21B10.2c;T21B10.2a;T21B10.2b | YIAELAGTGK                 | 23  | 1742   | 0.79 | 0.33 | 41 |
| 1  | T21B10.2c;T21B10.2a;T21B10.2b | VVLPVPAFNVINGGSHAGNK       | 22  | 875    | 0.79 | 0.18 | 23 |
| 22 | T21B10.2c;T21B10.2a;T21B10.2b | VNQIGSVTESIAAK             | 45  | 10133  | 0.80 | 0.09 | 12 |
| 22 | T21B10.2c;T21B10.2a;T21B10.2b | RYGLDATAVGDEGGFAPNIQDNK    | 15  | 4215   | 0.80 | 0.13 | 16 |
| 22 | T21B10.2c;T21B10.2a;T21B10.2b | YIAELAGTGK                 | 27  | 2460   | 0.80 | 0.21 | 26 |
| 1  | T21B10.2c;T21B10.2a;T21B10.2b | VVLPVPAFNVINGGSHAGNK       | 15  | 5180   | 0.81 | 0.03 | 4  |
| 7  | T21B10.2c;T21B10.2a;T21B10.2b | DIDDFMMALDGSSENK           | 113 | 3115   | 0.82 | 0.12 | 15 |
| 1  | T21B10.2c;T21B10.2a;T21B10.2b | GFDVTAQK                   | 63  | 9358   | 0.82 | 0.06 | 7  |
| 10 | T21B10.2c;T21B10.2a;T21B10.2b | GVFRAAVPSGASTGVHEALELRDGDK | 17  | 5467   | 0.83 | 0.41 | 49 |
| 1  | T21B10.2c;T21B10.2a;T21B10.2b | GLPLYK                     | 13  | 35161  | 0.84 | 0.14 | 17 |
| 10 | T21B10.2c;T21B10.2a;T21B10.2b | YIAELAGTGK                 | 40  | 2806   | 0.84 | 0.11 | 14 |
| 10 | T21B10.2c;T21B10.2a;T21B10.2b | FHGATSIQLVGDDLTVTNPK       | 146 | 11904  | 0.84 | 0.09 | 11 |
| 10 | T21B10.2c;T21B10.2a;T21B10.2b | YIAELAGTGK                 | 40  | 3461   | 0.85 | 0.23 | 27 |
| 1  | T21B10.2c;T21B10.2a;T21B10.2b | GFDVTAQK                   | 53  | 14893  | 0.85 | 0.05 | 5  |
| 10 | T21B10.2c;T21B10.2a;T21B10.2b | IHARQIYDSRGNPTVEVDLFTEK    | 27  | 12273  | 0.85 | 0.12 | 14 |
| 10 | T21B10.2c;T21B10.2a;T21B10.2b | DIDDFMMALDGSSENK           | 66  | 1063   | 0.86 | 0.18 | 21 |
| 7  | T21B10.2c;T21B10.2a;T21B10.2b | VVLPVPAFNVINGGSHAGNK       | 54  | 5318   | 0.86 | 0.15 | 17 |
| 1  | T21B10.2c;T21B10.2a;T21B10.2b | YIAELAGTGK                 | 19  | 1195   | 0.88 | 0.15 | 17 |
| 7  | T21B10.2c;T21B10.2a;T21B10.2b | YIAELAGTGK                 | 38  | 5149   | 0.88 | 0.11 | 13 |
| 1  | T21B10.2c;T21B10.2a;T21B10.2b | RIQTAIDK                   | 47  | 41448  | 0.88 | 0.11 | 13 |
| 10 | T21B10.2c;T21B10.2a;T21B10.2b | IAPALIAK                   | 48  | 103497 | 0.88 | 0.08 | 9  |
| 1  | T21B10.2c;T21B10.2a;T21B10.2b | DIDDFMMALDGSSENK           | 67  | 1795   | 0.88 | 0.14 | 16 |
| 1  | T21B10.2c;T21B10.2a;T21B10.2b | YIAELAGTGK                 | 70  | 127617 | 0.89 | 0.07 | 8  |
| 22 | T21B10.2c;T21B10.2a;T21B10.2b | YIAELAGTGK                 | 60  | 123692 | 0.89 | 0.08 | 9  |
| 7  | T21B10.2c;T21B10.2a;T21B10.2b | EGLDLLNTAIDK               | 74  | 4231   | 0.89 | 0.11 | 12 |
| 10 | T21B10.2c;T21B10.2a;T21B10.2b | YIAELAGTGK                 | 56  | 5663   | 0.90 | 0.08 | 9  |
| 22 | T21B10.2c;T21B10.2a;T21B10.2b | VNQIGSVTESIAAK             | 40  | 7907   | 0.90 | 0.19 | 21 |
| 1  | T21B10.2c;T21B10.2a;T21B10.2b | DIDDFMMALDGSSENK           | 71  | 2523   | 0.90 | 0.19 | 21 |
| 7  | T21B10.2c;T21B10.2a;T21B10.2b | ISIGMDVAASEFFK             | 35  | 1083   | 0.91 | 0.12 | 14 |
| 7  | T21B10.2c;T21B10.2a;T21B10.2b | ISIGMDVAASEFFK             | 18  | 1489   | 0.91 | 0.13 | 14 |
| 1  | T21B10.2c;T21B10.2a;T21B10.2b | RIQTAIDK                   | 48  | 59806  | 0.92 | 0.09 | 9  |
| 1  | T21B10.2c;T21B10.2a;T21B10.2b | DIDDFMMALDGSSENK           | 84  | 2712   | 0.92 | 0.10 | 11 |
| 7  | T21B10.2c;T21B10.2a;T21B10.2b | DIDDFMMALDGSSENK           | 72  | 2238   | 0.93 | 0.16 | 18 |
| 7  | T21B10.2c;T21B10.2a;T21B10.2b | ISIGMDVAASEFFK             | 62  | 1972   | 0.94 | 0.17 | 18 |
| 1  | T21B10.2c;T21B10.2a;T21B10.2b | YIAELAGTGK                 | 75  | 129064 | 0.95 | 0.06 | 7  |
| 10 | T21B10.2c;T21B10.2a;T21B10.2b | YIAELAGTGK                 | 52  | 4051   | 0.95 | 0.15 | 16 |
| 10 | T21B10.2c;T21B10.2a;T21B10.2b | YIAELAGTGK                 | 75  | 116728 | 0.96 | 0.04 | 4  |
| 22 | T21B10.2c;T21B10.2a;T21B10.2b | RYGLDATAVGDEGGFAPNIQDNK    | 16  | 4495   | 0.97 | 0.15 | 15 |
| 22 | T21B10.2c;T21B10.2a;T21B10.2b | GVFRAAVPSGASTGVHEALELRDGDK | 18  | 4980   | 0.97 | 0.07 | 7  |
| 10 | T21B10.2c;T21B10.2a;T21B10.2b | FHGATSIQLVGDDLTVTNPK       | 62  | 19427  | 0.97 | 0.14 | 15 |
| 10 | T21B10.2c;T21B10.2a;T21B10.2b | VNQIGSVTESIAAK             | 30  | 737    | 0.98 | 0.10 | 10 |
| 22 | T21B10.2c;T21B10.2a;T21B10.2b | GVFRAAVPSGASTGVHEALELRDGDK | 18  | 3724   | 0.98 | 0.15 | 16 |
| 7  | T21B10.2c;T21B10.2a;T21B10.2b | FHGATSIQLVGDDLTVTNPK       | 130 | 3614   | 0.98 | 0.15 | 15 |
| 7  | T21B10.2c;T21B10.2a;T21B10.2b | VVLPVPAFNVINGGSHAGNK       | 80  | 3691   | 0.99 | 0.16 | 16 |
| 22 | T21B10.2c;T21B10.2a;T21B10.2b | GFDVTAQK                   | 51  | 115349 | 1.00 | 0.05 | 5  |
| 10 | T21B10.2c;T21B10.2a;T21B10.2b | RYGLDATAVGDEGGFAPNIQDNK    | 119 | 4378   | 1.00 | 0.15 | 15 |
| 22 | T21B10.2c;T21B10.2a;T21B10.2b | YIAELAGTGK                 | 72  | 99931  | 1.00 | 0.07 | 7  |
| 7  | T21B10.2c;T21B10.2a;T21B10.2b | FHGATSIQLVGDDLTVTNPK       | 127 | 4150   | 1.01 | 0.16 | 16 |
| 22 | T21B10.2c;T21B10.2a;T21B10.2b | YIAELAGTGK                 | 18  | 4560   | 1.01 | 0.12 | 12 |
| 22 | T21B10.2c;T21B10.2a;T21B10.2b | GFDVTAQK                   | 61  | 143937 | 1.02 | 0.03 | 3  |
| 1  | T21B10.2c;T21B10.2a;T21B10.2b | YIAELAGTGK                 | 35  | 1602   | 1.02 | 0.19 | 19 |
| 10 | T21B10.2c;T21B10.2a;T21B10.2b | VVLPVPAFNVINGGSHAGNK       | 26  | 1210   | 1.03 | 0.26 | 25 |
| 22 | T21B10.2c;T21B10.2a;T21B10.2b | GVFRAAVPSGASTGVHEALELRDGDK | 10  | 6224   | 1.03 | 0.20 | 20 |
| 10 | T21B10.2c;T21B10.2a;T21B10.2b | YIAELAGTGK                 | 56  | 110745 | 1.04 | 0.04 | 4  |
| 10 | T21B10.2c;T21B10.2a;T21B10.2b | GFDVTAQK                   | 37  | 3983   | 1.05 | 0.15 | 14 |
| 22 | T21B10.2c;T21B10.2a;T21B10.2b | RIQTAIDK                   | 23  | 6093   | 1.06 | 0.12 | 11 |
| 7  | T21B10.2c;T21B10.2a;T21B10.2b | RYGLDATAVGDEGGFAPNIQDNK    | 34  | 3683   | 1.06 | 0.14 | 13 |
| 10 | T21B10.2c;T21B10.2a;T21B10.2b | RYGLDATAVGDEGGFAPNIQDNK    | 43  | 6991   | 1.07 | 0.08 | 7  |
| 7  | T21B10.2c;T21B10.2a;T21B10.2b | YIAELAGTGK                 | 20  | 1302   | 1.08 | 0.25 | 23 |
| 1  | T21B10.2c;T21B10.2a;T21B10.2b | RYGLDATAVGDEGGFAPNIQDNK    | 22  | 2400   | 1.08 | 0.22 | 20 |
| 10 | T21B10.2c;T21B10.2a;T21B10.2b | DIDDFMMALDGSSENK           | 53  | 1115   | 1.09 | 0.11 | 10 |

|    |                               |                            |     |        |       |      |     |
|----|-------------------------------|----------------------------|-----|--------|-------|------|-----|
| 22 | T21B10.2c;T21B10.2a;T21B10.2b | FHGATSIQLVGDDLTVTNPK       | 50  | 11884  | 1.09  | 0.12 | 11  |
| 7  | T21B10.2c;T21B10.2a;T21B10.2b | EGDLLNNTAIDK               | 56  | 3204   | 1.09  | 0.14 | 13  |
| 7  | T21B10.2c;T21B10.2a;T21B10.2b | YIAELAGTGK                 | 16  | 1826   | 1.11  | 0.24 | 22  |
| 22 | T21B10.2c;T21B10.2a;T21B10.2b | GLPLYK                     | 41  | 85551  | 1.12  | 0.10 | 9   |
| 22 | T21B10.2c;T21B10.2a;T21B10.2b | RIQTAIDK                   | 48  | 115755 | 1.13  | 0.12 | 11  |
| 1  | T21B10.2c;T21B10.2a;T21B10.2b | EGDLLNNTAIDK               | 64  | 1747   | 1.14  | 0.32 | 28  |
| 22 | T21B10.2c;T21B10.2a;T21B10.2b | RIQTAIDK                   | 23  | 5369   | 1.15  | 0.05 | 4   |
| 22 | T21B10.2c;T21B10.2a;T21B10.2b | VVLPVPAFNVINGGSHAGNK       | 12  | 6113   | 1.16  | 0.17 | 14  |
| 22 | T21B10.2c;T21B10.2a;T21B10.2b | RIQTAIDK                   | 42  | 156080 | 1.16  | 0.12 | 10  |
| 10 | T21B10.2c;T21B10.2a;T21B10.2b | RYGLDATAVGDEGGFAPNIQDNK    | 11  | 2771   | 1.18  | 0.20 | 17  |
| 10 | T21B10.2c;T21B10.2a;T21B10.2b | GVFRAAVPSGASTGVHEALELRDGDK | 20  | 21536  | 1.20  | 0.08 | 7   |
| 22 | T21B10.2c;T21B10.2a;T21B10.2b | FHGATSIQLVGDDLTVTNPK       | 52  | 15854  | 1.20  | 0.12 | 10  |
| 1  | T21B10.2c;T21B10.2a;T21B10.2b | YIAELAGTGK                 | 23  | 1764   | 1.23  | 0.07 | 5   |
| 10 | T21B10.2c;T21B10.2a;T21B10.2b | RIQTAIDK                   | 40  | 111350 | 1.23  | 0.09 | 8   |
| 10 | T21B10.2c;T21B10.2a;T21B10.2b | GVFRAAVPSGASTGVHEALELRDGDK | 16  | 6501   | 1.23  | 0.23 | 19  |
| 10 | T21B10.2c;T21B10.2a;T21B10.2b | VNQIGSVTESIEAAK            | 40  | 5727   | 1.29  | 0.13 | 10  |
| 10 | T21B10.2c;T21B10.2a;T21B10.2b | FHGATSIQLVGDDLTVTNPK       | 54  | 10871  | 1.30  | 0.15 | 11  |
| 22 | T21B10.2c;T21B10.2a;T21B10.2b | FHGATSIQLVGDDLTVTNPK       | 15  | 1843   | 1.31  | 0.08 | 6   |
| 22 | T21B10.2c;T21B10.2a;T21B10.2b | IHARQIYDSRGNPTEVDLFTEK     | 10  | 9691   | 1.31  | 0.14 | 11  |
| 1  | T21B10.2c;T21B10.2a;T21B10.2b | DIDDFMMALDGSSENK           | 61  | 1708   | 1.32  | 0.20 | 15  |
| 10 | T21B10.2c;T21B10.2a;T21B10.2b | GLPLYK                     | 29  | 123948 | 1.33  | 0.12 | 9   |
| 10 | T21B10.2c;T21B10.2a;T21B10.2b | RIQTAIDK                   | 30  | 4050   | 1.34  | 0.17 | 13  |
| 7  | T21B10.2c;T21B10.2a;T21B10.2b | VNQIGSVTESIEAAK            | 33  | 4378   | 1.34  | 0.18 | 13  |
| 10 | T21B10.2c;T21B10.2a;T21B10.2b | RIQTAIDK                   | 58  | 101945 | 1.34  | 0.10 | 7   |
| 1  | T21B10.2c;T21B10.2a;T21B10.2b | EGDLLNNTAIDK               | 68  | 1887   | 1.38  | 0.13 | 9   |
| 22 | T21B10.2c;T21B10.2a;T21B10.2b | VVLPVPAFNVINGGSHAGNK       | 35  | 4490   | 1.39  | 0.14 | 10  |
| 22 | T21B10.2c;T21B10.2a;T21B10.2b | IAPALIAK                   | 11  | 12012  | 1.40  | 0.11 | 8   |
| 7  | T21B10.2c;T21B10.2a;T21B10.2b | FHGATSIQLVGDDLTVTNPK       | 25  | 3782   | 1.41  | 0.12 | 9   |
| 7  | T21B10.2c;T21B10.2a;T21B10.2b | VNQIGSVTESIEAAK            | 31  | 2053   | 1.41  | 0.10 | 7   |
| 1  | T21B10.2c;T21B10.2a;T21B10.2b | VVLPVPAFNVINGGSHAGNK       | 10  | 4681   | 1.42  | 0.20 | 14  |
| 7  | T21B10.2c;T21B10.2a;T21B10.2b | IAPALIAK                   | 24  | 56690  | 1.43  | 0.21 | 15  |
| 1  | T21B10.2c;T21B10.2a;T21B10.2b | GVFRAAVPSGASTGVHEALELRDGDK | 13  | 6603   | 1.44  | 0.19 | 13  |
| 7  | T21B10.2c;T21B10.2a;T21B10.2b | YIAELAGTGK                 | 22  | 1752   | 1.45  | 0.11 | 7   |
| 1  | T21B10.2c;T21B10.2a;T21B10.2b | GVFRAAVPSGASTGVHEALELRDGDK | 16  | 8115   | 1.46  | 0.13 | 9   |
| 10 | T21B10.2c;T21B10.2a;T21B10.2b | GLPLYK                     | 42  | 89056  | 1.47  | 0.11 | 7   |
| 1  | T21B10.2c;T21B10.2a;T21B10.2b | IAPALIAK                   | 26  | 30791  | 1.48  | 0.07 | 5   |
| 7  | T21B10.2c;T21B10.2a;T21B10.2b | RIQTAIDK                   | 11  | 3527   | 1.49  | 0.12 | 8   |
| 22 | T21B10.2c;T21B10.2a;T21B10.2b | IHARQIYDSRGNPTEVDLFTEK     | 14  | 7580   | 1.49  | 0.07 | 5   |
| 22 | T21B10.2c;T21B10.2a;T21B10.2b | GVFRAAVPSGASTGVHEALELRDGDK | 32  | 6921   | 1.49  | 0.11 | 8   |
| 7  | T21B10.2c;T21B10.2a;T21B10.2b | VNQIGSVTESIEAAK            | 53  | 2220   | 1.50  | 0.10 | 6   |
| 1  | T21B10.2c;T21B10.2a;T21B10.2b | IAPALIAK                   | 51  | 64711  | 1.51  | 0.11 | 7   |
| 7  | T21B10.2c;T21B10.2a;T21B10.2b | VNQIGSVTESIEAAK            | 22  | 2744   | 1.54  | 0.16 | 10  |
| 1  | T21B10.2c;T21B10.2a;T21B10.2b | RIQTAIDK                   | 16  | 4149   | 1.54  | 0.30 | 20  |
| 22 | T21B10.2c;T21B10.2a;T21B10.2b | VNQIGSVTESIEAAK            | 37  | 3295   | 1.55  | 0.17 | 11  |
| 1  | T21B10.2c;T21B10.2a;T21B10.2b | VVLPVPAFNVINGGSHAGNK       | 24  | 1380   | 1.69  | 0.09 | 6   |
| 7  | T21B10.2c;T21B10.2a;T21B10.2b | IAPALIAK                   | 40  | 33206  | 1.72  | 0.12 | 7   |
| 22 | T21B10.2c;T21B10.2a;T21B10.2b | VVLPVPAFNVINGGSHAGNK       | 71  | 3415   | 1.73  | 0.10 | 6   |
| 1  | T21B10.2c;T21B10.2a;T21B10.2b | VNQIGSVTESIEAAK            | 87  | 4767   | 1.74  | 0.12 | 7   |
| 22 | T21B10.2c;T21B10.2a;T21B10.2b | IHARQIYDSRGNPTEVDLFTEK     | 21  | 14923  | 1.74  | 0.12 | 7   |
| 22 | T21B10.2c;T21B10.2a;T21B10.2b | GVFRAAVPSGASTGVHEALELRDGDK | 11  | 4459   | 1.75  | 0.05 | 3   |
| 1  | T21B10.2c;T21B10.2a;T21B10.2b | RIQTAIDK                   | 19  | 7664   | 1.79  | 0.15 | 9   |
| 1  | T21B10.2c;T21B10.2a;T21B10.2b | VVLPVPAFNVINGGSHAGNK       | 11  | 2540   | 1.84  | 0.14 | 8   |
| 10 | T21B10.2c;T21B10.2a;T21B10.2b | YIAELAGTGK                 | 10  | 2232   | 1.85  | 0.22 | 12  |
| 22 | T21B10.2c;T21B10.2a;T21B10.2b | VNQIGSVTESIEAAK            | 55  | 2477   | 1.85  | 0.14 | 8   |
| 7  | T21B10.2c;T21B10.2a;T21B10.2b | YIAELAGTGK                 | 24  | 2474   | 1.87  | 0.22 | 12  |
| 10 | T21B10.2c;T21B10.2a;T21B10.2b | IAPALIAK                   | 17  | 10374  | 1.90  | 0.13 | 7   |
| 22 | T21B10.2c;T21B10.2a;T21B10.2b | VNQIGSVTESIEAAK            | 56  | 5088   | 1.95  | 0.13 | 7   |
| 10 | T21B10.2c;T21B10.2a;T21B10.2b | VNQIGSVTESIEAAK            | 49  | 1677   | 1.98  | 0.07 | 4   |
| 22 | T21B10.2c;T21B10.2a;T21B10.2b | IAPALIAK                   | 15  | 11997  | 2.02  | 0.13 | 6   |
| 7  | T21B10.2c;T21B10.2a;T21B10.2b | IHARQIYDSRGNPTEVDLFTEK     | 18  | 3689   | 2.03  | 0.18 | 9   |
| 10 | T21B10.2c;T21B10.2a;T21B10.2b | IAPALIAK                   | 19  | 10936  | 2.06  | 0.13 | 6   |
| 22 | T21B10.2c;T21B10.2a;T21B10.2b | FHGATSIQLVGDDLTVTNPK       | 42  | 13808  | 2.09  | 0.15 | 7   |
| 7  | T21B10.2c;T21B10.2a;T21B10.2b | IHARQIYDSRGNPTEVDLFTEK     | 20  | 7920   | 2.14  | 0.16 | 7   |
| 22 | T21B10.2c;T21B10.2a;T21B10.2b | YIAELAGTGK                 | 45  | 4127   | 2.14  | 0.21 | 10  |
| 22 | T21B10.2c;T21B10.2a;T21B10.2b | RIQTAIDK                   | 25  | 10587  | 2.19  | 0.11 | 5   |
| 22 | T21B10.2c;T21B10.2a;T21B10.2b | FHGATSIQLVGDDLTVTNPK       | 29  | 10558  | 2.22  | 0.09 | 4   |
| 10 | T21B10.2c;T21B10.2a;T21B10.2b | VNQIGSVTESIEAAK            | 84  | 2444   | 2.26  | 0.13 | 6   |
| 22 | T21B10.2c;T21B10.2a;T21B10.2b | YIAELAGTGK                 | 56  | 6328   | 2.32  | 0.08 | 3   |
| 10 | T21B10.2c;T21B10.2a;T21B10.2b | YIAELAGTGK                 | 46  | 5893   | 2.34  | 0.14 | 6   |
| 10 | T21B10.2c;T21B10.2a;T21B10.2b | RIQTAIDK                   | 18  | 5283   | 2.43  | 0.25 | 10  |
| 22 | T21B10.2c;T21B10.2a;T21B10.2b | VNQIGSVTESIEAAK            | 38  | 1528   | 2.43  | 0.13 | 6   |
| 1  | T21B10.2c;T21B10.2a;T21B10.2b | VNQIGSVTESIEAAK            | 100 | 3125   | 2.54  | 0.11 | 4   |
| 10 | T21B10.2c;T21B10.2a;T21B10.2b | VNQIGSVTESIEAAK            | 29  | 3750   | 2.56  | 0.26 | 10  |
| 22 | T21B10.2c;T21B10.2a;T21B10.2b | RIQTAIDK                   | 21  | 5175   | 2.74  | 0.08 | 3   |
| 1  | T21B10.2c;T21B10.2a;T21B10.2b | YIAELAGTGK                 | 52  | 2563   | 2.76  | 0.13 | 5   |
| 7  | T21B10.2c;T21B10.2a;T21B10.2b | RYGLDATAVGDEGGFAPNIQDNK    | 80  | 4144   | 2.96  | 0.61 | 20  |
| 10 | T21B10.2c;T21B10.2a;T21B10.2b | RIQTAIDK                   | 29  | 8050   | 2.99  | 0.18 | 6   |
| 1  | T21B10.2c;T21B10.2a;T21B10.2b | YIAELAGTGK                 | 33  | 1556   | 3.22  | 0.24 | 7   |
| 7  | T21B10.2c;T21B10.2a;T21B10.2b | GNLGANAILGVSLAVAK          | 112 | 2126   | 3.55  | 0.14 | 4   |
| 7  | T21B10.2c;T21B10.2a;T21B10.2b | GNLGANAILGVSLAVAK          | 104 | 1665   | 4.40  | 0.15 | 4   |
| 7  | T21B10.2c;T21B10.2a;T21B10.2b | VNQIGSVTESIEAAK            | 78  | 3397   | 6.31  | 0.33 | 5   |
| 7  | T21B10.2c;T21B10.2a;T21B10.2b | ISIGMDVAASEFFK             | 43  | 2739   | 9.40  | 0.56 | 6   |
| 7  | T21B10.2c;T21B10.2a;T21B10.2b | ISIGMDVAASEFFK             | 50  | 3023   | 9.55  | 0.44 | 5   |
| 7  | T21B10.2c;T21B10.2a;T21B10.2b | FHGATSIQLVGDDLTVTNPK       | 68  | 13719  | 13.52 | 0.81 | 6   |
| 7  | T21B10.2c;T21B10.2a;T21B10.2b | FHGATSIQLVGDDLTVTNPK       | 62  | 6274   | 40.30 | 0.58 | 1   |
| 7  | T21B10.2c;T21B10.2a;T21B10.2b | RIQTAIDK                   | 30  | 4561   | 61.26 | 0.61 | 1   |
| 10 | T21B10.7                      | VAELEAAEK                  | 47  | 3589   | 0.21  | 0.17 | 82  |
| 22 | T21B10.7                      | VAELEAAEK                  | 47  | 4668   | 0.31  | 0.31 | 100 |
| 7  | T21B10.7                      | ILISGNPESAGGIK             | 28  | 1724   | 0.38  | 0.20 | 54  |
| 22 | T21B10.7                      | SSIESGDNIRDDLK             | 28  | 4058   | 0.48  | 0.14 | 29  |
| 22 | T21B10.7                      | VTNDGATILK                 | 42  | 4782   | 0.48  | 0.18 | 38  |
| 7  | T21B10.7                      | ILISGNPESAGGIK             | 48  | 2101   | 0.49  | 0.20 | 40  |
| 1  | T21B10.7                      | LGVIESYNVK                 | 14  | 579    | 0.51  | 0.12 | 24  |
| 22 | T21B10.7                      | VAELEAAEK                  | 45  | 2534   | 0.54  | 0.20 | 37  |
| 22 | T21B10.7                      | SSIESGDNIRDDLK             | 29  | 4357   | 0.54  | 0.20 | 37  |
| 7  | T21B10.7                      | SSIESGDNIRDDLK             | 25  | 1272   | 0.55  | 0.21 | 38  |
| 1  | T21B10.7                      | GSGNLDAIQIK                | 29  | 1019   | 0.55  | 0.09 | 16  |
| 7  | T21B10.7                      | VTNDGATILK                 | 24  | 2413   | 0.60  | 0.21 | 36  |
| 10 | T21B10.7                      | VTNDGATILK                 | 11  | 1930   | 0.60  | 0.14 | 22  |
| 7  | T21B10.7                      | VTNDGATILK                 | 12  | 2615   | 0.60  | 0.26 | 44  |
| 22 | T21B10.7                      | VAELEAAEK                  | 44  | 3055   | 0.61  | 0.27 | 44  |

|             |                |    |       |      |      |     |
|-------------|----------------|----|-------|------|------|-----|
| 7 T21B10.7  | SIGVDNPAAK     | 11 | 1111  | 0.63 | 0.15 | 23  |
| 10 T21B10.7 | VTNDGATILK     | 25 | 3105  | 0.63 | 0.35 | 55  |
| 22 T21B10.7 | SSIESGDNIRDDLK | 42 | 4179  | 0.64 | 0.18 | 29  |
| 22 T21B10.7 | SIGVDNPAAK     | 19 | 6109  | 0.65 | 0.06 | 8   |
| 22 T21B10.7 | LGVIESYNVK     | 17 | 1047  | 0.67 | 0.28 | 42  |
| 10 T21B10.7 | LGVIESYNVK     | 22 | 642   | 0.67 | 0.17 | 26  |
| 22 T21B10.7 | LGVIESYNVK     | 30 | 1042  | 0.67 | 0.36 | 53  |
| 22 T21B10.7 | SSIESGDNIRDDLK | 47 | 4770  | 0.68 | 0.13 | 19  |
| 7 T21B10.7  | VTNDGATILK     | 28 | 5288  | 0.71 | 0.26 | 37  |
| 22 T21B10.7 | LGVIESYNVK     | 12 | 976   | 0.73 | 0.48 | 65  |
| 1 T21B10.7  | GSGNLDAIQIHK   | 46 | 1073  | 0.75 | 0.13 | 18  |
| 7 T21B10.7  | GSGNLDAIQIHK   | 15 | 897   | 0.77 | 0.16 | 21  |
| 1 T21B10.7  | ILISGNPESAGGIK | 15 | 595   | 0.79 | 0.16 | 20  |
| 10 T21B10.7 | SIGVDNPAAK     | 36 | 9697  | 0.82 | 0.08 | 10  |
| 1 T21B10.7  | LGVIESYNVK     | 38 | 1698  | 0.84 | 0.16 | 19  |
| 10 T21B10.7 | SIGVDNPAAK     | 50 | 9045  | 0.90 | 0.13 | 15  |
| 1 T21B10.7  | SSIESGDNIRDDLK | 35 | 1610  | 0.90 | 0.11 | 12  |
| 7 T21B10.7  | VTNDGATILK     | 19 | 2461  | 0.91 | 0.27 | 30  |
| 10 T21B10.7 | VTNDGATILK     | 14 | 2832  | 0.93 | 0.09 | 9   |
| 1 T21B10.7  | VTNDGATILK     | 15 | 1628  | 0.95 | 0.16 | 17  |
| 7 T21B10.7  | VTNDGATILK     | 22 | 4185  | 0.96 | 0.15 | 16  |
| 22 T21B10.7 | ILISGNPESAGGIK | 62 | 2172  | 0.96 | 0.13 | 13  |
| 7 T21B10.7  | ILISGNPESAGGIK | 16 | 967   | 0.97 | 0.18 | 19  |
| 7 T21B10.7  | SSIESGDNIRDDLK | 45 | 4333  | 0.97 | 0.18 | 18  |
| 10 T21B10.7 | VTNDGATILK     | 37 | 4259  | 0.99 | 0.25 | 25  |
| 10 T21B10.7 | SSIESGDNIRDDLK | 11 | 1778  | 0.99 | 0.18 | 18  |
| 1 T21B10.7  | SSIESGDNIRDDLK | 12 | 1624  | 1.00 | 0.14 | 14  |
| 1 T21B10.7  | LGVIESYNVK     | 34 | 1663  | 1.00 | 0.15 | 15  |
| 22 T21B10.7 | SIGVDNPAAK     | 15 | 3268  | 1.00 | 0.08 | 8   |
| 22 T21B10.7 | ILISGNPESAGGIK | 51 | 3056  | 1.02 | 0.16 | 16  |
| 7 T21B10.7  | SIGVDNPAAK     | 18 | 3192  | 1.06 | 0.15 | 14  |
| 7 T21B10.7  | LGVIESYNVK     | 27 | 1670  | 1.07 | 0.23 | 22  |
| 22 T21B10.7 | VTNDGATILK     | 18 | 2521  | 1.08 | 0.20 | 18  |
| 10 T21B10.7 | SSIESGDNIRDDLK | 54 | 5043  | 1.09 | 0.16 | 14  |
| 7 T21B10.7  | GSGNLDAIQIHK   | 38 | 1941  | 1.11 | 0.19 | 18  |
| 22 T21B10.7 | VTNDGATILK     | 14 | 2121  | 1.12 | 0.22 | 19  |
| 10 T21B10.7 | VTNDGATILK     | 29 | 2590  | 1.13 | 0.38 | 33  |
| 7 T21B10.7  | ILISGNPESAGGIK | 35 | 1428  | 1.17 | 0.27 | 23  |
| 10 T21B10.7 | VTNDGATILK     | 20 | 3269  | 1.17 | 0.28 | 24  |
| 22 T21B10.7 | LGVIESYNVK     | 33 | 1403  | 1.18 | 0.26 | 22  |
| 10 T21B10.7 | GSGNLDAIQIHK   | 54 | 1475  | 1.19 | 0.10 | 8   |
| 1 T21B10.7  | GSGNLDAIQIHK   | 48 | 2022  | 1.21 | 0.24 | 20  |
| 1 T21B10.7  | ILISGNPESAGGIK | 52 | 2885  | 1.21 | 0.09 | 7   |
| 7 T21B10.7  | SIGVDNPAAK     | 16 | 4648  | 1.22 | 0.09 | 8   |
| 1 T21B10.7  | GSGNLDAIQIHK   | 57 | 3015  | 1.23 | 0.29 | 24  |
| 7 T21B10.7  | VTNDGATILK     | 21 | 3539  | 1.26 | 0.19 | 15  |
| 10 T21B10.7 | VTNDGATILK     | 12 | 1604  | 1.26 | 0.11 | 9   |
| 7 T21B10.7  | ILISGNPESAGGIK | 27 | 1946  | 1.28 | 0.12 | 10  |
| 22 T21B10.7 | VTNDGATILK     | 15 | 3157  | 1.30 | 0.23 | 18  |
| 1 T21B10.7  | VTNDGATILK     | 24 | 2766  | 1.31 | 0.32 | 25  |
| 1 T21B10.7  | IARTTLGSK      | 11 | 1800  | 1.32 | 0.16 | 12  |
| 10 T21B10.7 | GSGNLDAIQIHK   | 22 | 1193  | 1.32 | 0.24 | 18  |
| 22 T21B10.7 | VTNDGATILK     | 14 | 3361  | 1.35 | 0.41 | 30  |
| 10 T21B10.7 | SSIESGDNIRDDLK | 38 | 5708  | 1.36 | 0.07 | 5   |
| 1 T21B10.7  | ILISGNPESAGGIK | 15 | 907   | 1.40 | 0.14 | 10  |
| 1 T21B10.7  | ILISGNPESAGGIK | 55 | 2035  | 1.43 | 0.18 | 13  |
| 1 T21B10.7  | IARTTLGSK      | 21 | 2106  | 1.44 | 0.18 | 13  |
| 10 T21B10.7 | LGVIESYNVK     | 16 | 862   | 1.45 | 0.17 | 12  |
| 10 T21B10.7 | IARTTLGSK      | 11 | 2083  | 1.50 | 0.13 | 9   |
| 10 T21B10.7 | GSGNLDAIQIHK   | 55 | 2950  | 1.56 | 0.12 | 8   |
| 7 T21B10.7  | LGVIESYNVK     | 22 | 1424  | 1.70 | 0.09 | 6   |
| 1 T21B10.7  | ILISGNPESAGGIK | 61 | 2411  | 1.79 | 0.20 | 11  |
| 10 T21B10.7 | ILISGNPESAGGIK | 38 | 2720  | 1.82 | 0.10 | 6   |
| 10 T21B10.7 | ILISGNPESAGGIK | 11 | 2157  | 1.93 | 0.28 | 15  |
| 10 T21B10.7 | IARTTLGSK      | 16 | 4055  | 2.44 | 0.09 | 4   |
| 10 T21B10.7 | IARTTLGSK      | 10 | 2276  | 2.62 | 0.20 | 8   |
| 22 T21C12.2 | RGNLFYDNVK     | 38 | 13020 | 0.21 | 0.23 | 108 |
| 22 T21C12.2 | ALFESIELEQTK   | 57 | 2221  | 0.26 | 0.17 | 68  |
| 22 T21C12.2 | NYRGAF LPGFK   | 28 | 7813  | 0.28 | 0.36 | 131 |
| 7 T21C12.2  | RGNLFYDNVK     | 31 | 1975  | 0.29 | 0.26 | 91  |
| 22 T21C12.2 | ERLAASSMVVK    | 32 | 4720  | 0.31 | 0.23 | 74  |
| 7 T21C12.2  | RGNLFYDNVK     | 35 | 3516  | 0.32 | 0.19 | 59  |
| 22 T21C12.2 | RGNLFYDNVK     | 35 | 6234  | 0.38 | 0.36 | 95  |
| 22 T21C12.2 | ERLAASSMVVK    | 31 | 2674  | 0.47 | 0.30 | 65  |
| 22 T21C12.2 | ALFESIELEQTK   | 52 | 1974  | 0.51 | 0.25 | 49  |
| 22 T21C12.2 | ERLAASSMVVK    | 18 | 2938  | 0.55 | 0.14 | 25  |
| 1 T21C12.2  | RGNLFYDNVK     | 18 | 1326  | 0.62 | 0.14 | 23  |
| 7 T21C12.2  | RGNLFYDNVK     | 19 | 4634  | 0.63 | 0.22 | 35  |
| 7 T21C12.2  | RGNLFYDNVK     | 11 | 1691  | 0.75 | 0.07 | 10  |
| 7 T21C12.2  | ALFESIELEQTK   | 54 | 1805  | 0.80 | 0.21 | 26  |
| 7 T21C12.2  | RGNLFYDNVK     | 13 | 849   | 0.82 | 0.32 | 39  |
| 1 T21C12.2  | RGNLFYDNVK     | 21 | 1694  | 0.85 | 0.07 | 8   |
| 1 T21C12.2  | AHPMPATFFK     | 12 | 6526  | 0.86 | 0.06 | 7   |
| 22 T21C12.2 | ALFESIELEQTK   | 49 | 1726  | 0.86 | 0.08 | 9   |
| 10 T21C12.2 | AHPMPATFFK     | 12 | 8679  | 0.86 | 0.02 | 3   |
| 10 T21C12.2 | AHPMPATFFK     | 11 | 3622  | 0.90 | 0.10 | 11  |
| 7 T21C12.2  | ALFESIELEQTK   | 38 | 1693  | 1.04 | 0.16 | 16  |
| 1 T21C12.2  | ERLAASSMVVK    | 12 | 2778  | 1.09 | 0.19 | 18  |
| 22 T21C12.2 | RGNLFYDNVK     | 16 | 17480 | 1.09 | 0.09 | 8   |
| 7 T21C12.2  | AHPMPATFFK     | 10 | 8841  | 1.11 | 0.09 | 8   |
| 7 T21C12.2  | ALFESIELEQTK   | 37 | 1899  | 1.15 | 0.07 | 6   |
| 7 T21C12.2  | NYRGAF LPGFK   | 27 | 8606  | 1.17 | 0.07 | 6   |
| 10 T21C12.2 | ERLAASSMVVK    | 32 | 8317  | 1.18 | 0.14 | 12  |
| 1 T21C12.2  | NYRGAF LPGFK   | 41 | 2609  | 1.21 | 0.09 | 8   |
| 22 T21C12.2 | RGNLFYDNVK     | 35 | 12226 | 1.23 | 0.14 | 11  |
| 22 T21C12.2 | AHPMPATFFK     | 12 | 15908 | 1.25 | 0.09 | 8   |
| 1 T21C12.2  | AHPMPATFFK     | 18 | 5869  | 1.27 | 0.19 | 15  |
| 1 T21C12.2  | ALFESIELEQTK   | 53 | 551   | 1.28 | 0.12 | 10  |
| 10 T21C12.2 | AHPMPATFFK     | 14 | 12087 | 1.31 | 0.04 | 3   |
| 22 T21C12.2 | NYRGAF LPGFK   | 38 | 21255 | 1.34 | 0.10 | 7   |
| 7 T21C12.2  | ERLAASSMVVK    | 19 | 1958  | 1.36 | 0.09 | 6   |

|                     |                      |     |       |       |      |     |
|---------------------|----------------------|-----|-------|-------|------|-----|
| 1 T21C12.2          | NYRGAFLPGFK          | 31  | 3054  | 1.41  | 0.09 | 6   |
| 7 T21C12.2          | RGNLFYDNVK           | 21  | 9308  | 1.42  | 0.04 | 3   |
| 1 T21C12.2          | AHPMPATFFK           | 12  | 4830  | 1.42  | 0.10 | 7   |
| 10 T21C12.2         | ALFESIELEQTK         | 54  | 1141  | 1.43  | 0.25 | 17  |
| 22 T21C12.2         | NYRGAFLPGFK          | 32  | 18625 | 1.46  | 0.07 | 5   |
| 10 T21C12.2         | ERLAASSMVVK          | 17  | 1739  | 1.50  | 0.19 | 12  |
| 7 T21C12.2          | NYRGAFLPGFK          | 21  | 6075  | 1.51  | 0.22 | 14  |
| 10 T21C12.2         | ERLAASSMVVK          | 19  | 5130  | 1.53  | 0.10 | 7   |
| 22 T21C12.2         | RGNLFYDNVK           | 23  | 14078 | 1.55  | 0.12 | 8   |
| 1 T21C12.2          | AHPMPATFFK           | 11  | 3117  | 1.57  | 0.14 | 9   |
| 1 T21C12.2          | RGNLFYDNVK           | 29  | 3965  | 1.57  | 0.17 | 11  |
| 10 T21C12.2         | RGNLFYDNVK           | 25  | 5121  | 1.61  | 0.18 | 11  |
| 10 T21C12.2         | RGNLFYDNVK           | 18  | 3510  | 1.63  | 0.07 | 4   |
| 10 T21C12.2         | ERLAASSMVVK          | 26  | 1811  | 1.64  | 0.12 | 7   |
| 10 T21C12.2         | NYRGAFLPGFK          | 33  | 3807  | 1.65  | 0.11 | 7   |
| 22 T21C12.2         | ALFESIELEQTK         | 67  | 1183  | 1.68  | 0.13 | 8   |
| 22 T21C12.2         | ALFESIELEQTK         | 65  | 2209  | 1.71  | 0.11 | 7   |
| 7 T21C12.2          | ERLAASSMVVK          | 29  | 6396  | 1.75  | 0.06 | 4   |
| 10 T21C12.2         | NYRGAFLPGFK          | 28  | 5479  | 1.78  | 0.16 | 9   |
| 22 T21C12.2         | AHPMPATFFK           | 12  | 11863 | 1.87  | 0.09 | 5   |
| 1 T21C12.2          | ALFESIELEQTK         | 60  | 903   | 1.97  | 0.20 | 10  |
| 22 T21C12.2         | ERLAASSMVVK          | 14  | 13224 | 1.99  | 0.09 | 5   |
| 22 T21C12.2         | ERLAASSMVVK          | 26  | 9666  | 2.04  | 0.10 | 5   |
| 22 T21C12.2         | RGNLFYDNVK           | 37  | 9286  | 2.06  | 0.15 | 7   |
| 7 T21C12.2          | GLETGSRITQHAIRQDK    | 12  | 3778  | 2.20  | 0.46 | 21  |
| 22 T21C12.2         | NYRGAFLPGFK          | 25  | 4865  | 2.43  | 0.12 | 5   |
| 22 T21C12.2         | ERLAASSMVVK          | 19  | 1702  | 2.81  | 0.12 | 4   |
| 22 T21C12.2         | NYRGAFLPGFK          | 30  | 8042  | 2.90  | 0.09 | 3   |
| 10 T21C12.2         | DVCFEVEDLSIIAHAK     | 19  | 1544  | 3.80  | 0.33 | 9   |
| 10 T21C12.2         | RGNLFYDNVK           | 26  | 5182  | 9.45  | 0.54 | 6   |
| 22 T21E3.3          | NGILIPK              | 30  | 12021 | 0.84  | 0.43 | 51  |
| 10 T21E3.3          | NGILIPK              | 38  | 6239  | 2.26  | 0.00 | 0   |
| 10 T21E3.3          | NGILIPK              | 39  | 8253  | 3.94  | 0.00 | 0   |
| 22 T21E3.3          | NGILIPK              | 28  | 12527 | 4.47  | 0.00 | 0   |
| 22 T21E3.3          | NGILIPK              | 34  | 4628  | 5.67  | 0.00 | 0   |
| 1 T21E3.3           | NGILIPK              | 28  | 17453 | 6.32  | 0.00 | 0   |
| 22 T21E3.3          | NGILIPK              | 29  | 5372  | 10.63 | 0.00 | 0   |
| 10 T21E3.3          | NGILIPK              | 38  | 7312  | 13.41 | 0.00 | 0   |
| 7 T21E3.3           | NGILIPK              | 26  | 9159  | 21.38 | 0.00 | 0   |
| 22 T21E8.3          | TLAIVGPSGSGK         | 12  | 5120  | 1.39  | 0.07 | 5   |
| 7 T21H3.1a          | AYAAAVDRDVTNK        | 49  | 2214  | 0.31  | 0.27 | 89  |
| 7 T21H3.1a          | LQLVTYQQPRVGDK       | 36  | 1737  | 0.39  | 0.19 | 50  |
| 22 T21H3.1a         | LQLVTYQQPRVGDK       | 44  | 1873  | 0.39  | 0.25 | 65  |
| 22 T21H3.1a         | LQLVTYQQPRVGDK       | 28  | 2047  | 0.44  | 0.17 | 38  |
| 10 T21H3.1a         | LQLVTYQQPRVGDK       | 19  | 2370  | 0.52  | 0.11 | 22  |
| 10 T21H3.1a         | LQLVTYQQPRVGDK       | 16  | 4518  | 0.53  | 0.10 | 18  |
| 10 T21H3.1a         | LQLVTYQQPRVGDK       | 20  | 4358  | 0.54  | 0.16 | 29  |
| 10 T21H3.1a         | LQLVTYQQPRVGDK       | 13  | 1901  | 0.62  | 0.16 | 25  |
| 10 T21H3.1a         | AYAAAVDRDVTNK        | 63  | 6353  | 0.84  | 0.14 | 17  |
| 7 T21H3.1a          | LQLVTYQQPRVGDK       | 33  | 3414  | 0.84  | 0.25 | 30  |
| 7 T21H3.1a          | LQLVTYQQPRVGDK       | 23  | 1698  | 0.84  | 0.18 | 22  |
| 10 T21H3.1a         | AYAAAVDRDVTNK        | 58  | 6795  | 0.89  | 0.07 | 8   |
| 22 T21H3.1a         | LQLVTYQQPRVGDK       | 54  | 2390  | 0.89  | 0.29 | 32  |
| 22 T21H3.1a         | AYAAAVDRDVTNK        | 52  | 1634  | 0.96  | 0.16 | 16  |
| 22 T21H3.1a         | LQLVTYQQPRVGDK       | 31  | 2415  | 1.06  | 0.07 | 7   |
| 22 T21H3.1a         | AYAAAVDRDVTNK        | 55  | 1890  | 1.09  | 0.15 | 14  |
| 22 T21H3.1a         | AYAAAVDRDVTNK        | 38  | 3310  | 1.19  | 0.12 | 10  |
| 10 T21H3.1a         | FRVTHAHDVPVPHLPK     | 16  | 12514 | 1.30  | 0.14 | 10  |
| 10 T21H3.1a         | FRVTHAHDVPVPHLPK     | 28  | 34597 | 1.35  | 0.10 | 7   |
| 22 T21H3.1a         | AYAAAVDRDVTNK        | 49  | 2761  | 1.36  | 0.12 | 9   |
| 10 T21H3.1a         | FRVTHAHDVPVPHLPK     | 20  | 45408 | 1.47  | 0.13 | 9   |
| 10 T21H3.1a         | FRVTHAHDVPVPHLPK     | 12  | 6439  | 1.64  | 0.15 | 9   |
| 22 T21H3.1a         | FRVTHAHDVPVPHLPK     | 13  | 1569  | 1.75  | 0.07 | 4   |
| 7 T21H3.1a          | AYAAAVDRDVTNK        | 37  | 1694  | 1.84  | 0.17 | 9   |
| 10 T21H3.1a         | LQLVTYQQPRVGDK       | 19  | 4718  | 1.91  | 0.09 | 5   |
| 7 T21H3.1a          | AYAAAVDRDVTNK        | 33  | 2084  | 1.97  | 0.19 | 10  |
| 10 T21H3.1a         | LQLVTYQQPRVGDK       | 25  | 3956  | 2.22  | 0.09 | 4   |
| 10 T21H3.1a         | FRVTHAHDVPVPHLPK     | 25  | 22994 | 2.33  | 0.19 | 8   |
| 10 T21H3.1a         | FRVTHAHDVPVPHLPK     | 12  | 2674  | 2.64  | 0.08 | 3   |
| 7 T21H3.1a          | FRVTHAHDVPVPHLPK     | 12  | 7320  | 2.74  | 0.19 | 7   |
| 22 T21H3.1a         | FRVTHAHDVPVPHLPK     | 10  | 5905  | 2.91  | 0.13 | 5   |
| 22 T21H3.1a         | FRVTHAHDVPVPHLPK     | 11  | 7639  | 3.12  | 0.18 | 6   |
| 1 T21H3.1a;T21H3.1b | AYAAAVDRDVTNK        | 38  | 977   | 0.21  | 0.36 | 174 |
| 1 T21H3.1a;T21H3.1b | AYAAAVDRDVTNK        | 36  | 803   | 0.30  | 0.18 | 61  |
| 1 T21H3.1a;T21H3.1b | AYAAAVDRDVTNK        | 21  | 647   | 0.36  | 0.09 | 25  |
| 1 T21H3.1a;T21H3.1b | AYAAAVDRDVTNK        | 45  | 1039  | 0.38  | 0.20 | 53  |
| 1 T21H3.1a;T21H3.1b | AYAAAVDRDVTNK        | 34  | 2924  | 0.59  | 0.10 | 16  |
| 1 T21H3.1a;T21H3.1b | AYAAAVDRDVTNK        | 37  | 3918  | 0.63  | 0.12 | 19  |
| 1 T21H3.1a;T21H3.1b | AYAAAVDRDVTNK        | 57  | 2891  | 0.70  | 0.14 | 20  |
| 1 T21H3.1a;T21H3.1b | FRVTHAHDVPVPHLPK     | 15  | 1716  | 0.76  | 0.23 | 30  |
| 1 T21H3.1a;T21H3.1b | AYAAAVDRDVTNK        | 37  | 2408  | 0.86  | 0.17 | 20  |
| 1 T21H3.1a;T21H3.1b | FRVTHAHDVPVPHLPK     | 18  | 10102 | 0.93  | 0.16 | 17  |
| 1 T21H3.1a;T21H3.1b | FRVTHAHDVPVPHLPK     | 15  | 3864  | 0.95  | 0.16 | 17  |
| 1 T21H3.1a;T21H3.1b | LQLVTYQQPRVGDK       | 20  | 1099  | 1.14  | 0.11 | 10  |
| 1 T21H3.1a;T21H3.1b | FRVTHAHDVPVPHLPK     | 25  | 10519 | 1.33  | 0.13 | 10  |
| 1 T21H3.1a;T21H3.1b | FRVTHAHDVPVPHLPK     | 13  | 6015  | 2.06  | 0.15 | 7   |
| 22 T22B11.5         | IAVVANPSHLEAVDPVVMGK | 70  | 3332  | 0.07  | 0.35 | 535 |
| 22 T22B11.5         | IAVVANPSHLEAVDPVVMGK | 48  | 2954  | 0.08  | 0.23 | 296 |
| 22 T22B11.5         | VRAEAFYAGDEK         | 14  | 1687  | 0.13  | 0.28 | 210 |
| 22 T22B11.5         | YGSILEDAYENAQK       | 100 | 899   | 0.16  | 0.63 | 402 |
| 22 T22B11.5         | IAVVANPSHLEAVDPVVMGK | 80  | 4400  | 0.16  | 0.33 | 202 |
| 10 T22B11.5         | YQGAELWAQEEHK        | 89  | 3167  | 0.23  | 0.19 | 85  |
| 10 T22B11.5         | YQGAELWAQEEHK        | 68  | 3764  | 0.23  | 0.17 | 72  |
| 1 T22B11.5          | ILNEGVANEQYVK        | 61  | 1980  | 0.26  | 0.15 | 59  |
| 1 T22B11.5          | ILNEGVANEQYVK        | 43  | 1365  | 0.29  | 0.17 | 61  |
| 10 T22B11.5         | YGSILEDAYENAQK       | 72  | 2293  | 0.32  | 0.14 | 46  |
| 10 T22B11.5         | LPSTGIEQENIEQIGK     | 63  | 3886  | 0.34  | 0.12 | 36  |
| 10 T22B11.5         | LPSTGIEQENIEQIGK     | 39  | 2745  | 0.34  | 0.23 | 67  |
| 1 T22B11.5          | VRAEAFYAGDEK         | 13  | 695   | 0.36  | 0.11 | 31  |
| 10 T22B11.5         | ILNEGVANEQYVK        | 32  | 2046  | 0.37  | 0.25 | 66  |
| 10 T22B11.5         | VRAEAFYAGDEK         | 21  | 2980  | 0.41  | 0.10 | 25  |

|                      |                        |    |       |      |      |     |
|----------------------|------------------------|----|-------|------|------|-----|
| 10 T22B11.5          | YGSILEDAYENAQK         | 57 | 1627  | 0.49 | 0.20 | 41  |
| 10 T22B11.5          | ILNEGVANEQYVK          | 63 | 3989  | 0.50 | 0.08 | 17  |
| 22 T22B11.5          | YGSILEDAYENAQK         | 69 | 1611  | 0.51 | 0.16 | 32  |
| 10 T22B11.5          | LPSTGIEQENIEQIIGK      | 35 | 1106  | 0.52 | 0.09 | 18  |
| 22 T22B11.5          | YGSILEDAYENAQK         | 61 | 1322  | 0.57 | 0.14 | 25  |
| 22 T22B11.5          | VYYDMVAARK             | 22 | 2663  | 0.60 | 0.11 | 18  |
| 22 T22B11.5          | YGSILEDAYENAQK         | 56 | 2101  | 0.67 | 0.24 | 36  |
| 22 T22B11.5          | YQGAEILWAQEEHK         | 52 | 2442  | 0.71 | 0.13 | 19  |
| 22 T22B11.5          | LPSTGIEQENIEQIIGK      | 59 | 2377  | 0.74 | 0.17 | 23  |
| 7 T22B11.5           | YAGRLPSSSPATGNK        | 20 | 404   | 0.76 | 0.21 | 28  |
| 22 T22B11.5          | YGSILEDAYENAQK         | 50 | 1219  | 0.80 | 0.17 | 22  |
| 10 T22B11.5          | YGSILEDAYENAQK         | 80 | 1272  | 0.80 | 0.20 | 25  |
| 22 T22B11.5          | YGSILEDAYENAQK         | 88 | 1598  | 0.80 | 0.20 | 26  |
| 1 T22B11.5           | IAVVANPSHLEAVDPVVMGK   | 12 | 949   | 0.81 | 0.17 | 21  |
| 1 T22B11.5           | ILNEGVANEQYVK          | 65 | 2698  | 0.83 | 0.19 | 23  |
| 10 T22B11.5          | YGSILEDAYENAQK         | 71 | 2013  | 0.83 | 0.18 | 21  |
| 10 T22B11.5          | YGSILEDAYENAQK         | 61 | 728   | 0.87 | 0.19 | 22  |
| 22 T22B11.5          | VYYDMVAARK             | 11 | 1956  | 0.89 | 0.12 | 14  |
| 1 T22B11.5           | YQGAEILWAQEEHK         | 54 | 1120  | 0.98 | 0.17 | 17  |
| 10 T22B11.5          | LPSTGIEQENIEQIIGK      | 46 | 1829  | 0.98 | 0.33 | 33  |
| 22 T22B11.5          | YGSILEDAYENAQK         | 68 | 1939  | 1.03 | 0.16 | 16  |
| 10 T22B11.5          | YGSILEDAYENAQK         | 71 | 636   | 1.04 | 0.23 | 22  |
| 22 T22B11.5          | LPSTGIEQENIEQIIGK      | 23 | 1394  | 1.06 | 0.24 | 23  |
| 1 T22B11.5           | VRAEAFYAGDEK           | 18 | 1486  | 1.13 | 0.18 | 16  |
| 10 T22B11.5          | YGSILEDAYENAQK         | 75 | 1118  | 1.14 | 0.22 | 19  |
| 22 T22B11.5          | YGSILEDAYENAQK         | 84 | 2460  | 1.16 | 0.15 | 13  |
| 1 T22B11.5           | ILNEGVANEQYVK          | 74 | 4178  | 1.16 | 0.14 | 12  |
| 10 T22B11.5          | YGSILEDAYENAQK         | 87 | 1400  | 1.17 | 0.13 | 12  |
| 22 T22B11.5          | YGSILEDAYENAQK         | 68 | 1922  | 1.18 | 0.28 | 24  |
| 10 T22B11.5          | IAVVANPSHLEAVDPVVMGK   | 58 | 3780  | 1.19 | 0.19 | 16  |
| 7 T22B11.5           | YAGRLPSSSPATGNK        | 24 | 1480  | 1.22 | 0.11 | 9   |
| 22 T22B11.5          | LPSTGIEQENIEQIIGK      | 65 | 2467  | 1.25 | 0.25 | 20  |
| 22 T22B11.5          | VRAEAFYAGDEK           | 14 | 3099  | 1.28 | 0.03 | 3   |
| 10 T22B11.5          | VYYDMVAARK             | 17 | 2255  | 1.30 | 0.16 | 12  |
| 22 T22B11.5          | LPSTGIEQENIEQIIGK      | 45 | 2096  | 1.35 | 0.14 | 10  |
| 1 T22B11.5           | YQGAEILWAQEEHK         | 34 | 911   | 1.38 | 0.22 | 16  |
| 1 T22B11.5           | YAGRLPSSSPATGNK        | 31 | 1533  | 1.41 | 0.18 | 13  |
| 22 T22B11.5          | YQGAEILWAQEEHK         | 63 | 4893  | 1.43 | 0.11 | 8   |
| 1 T22B11.5           | YAGRLPSSSPATGNK        | 36 | 1839  | 1.43 | 0.08 | 6   |
| 10 T22B11.5          | VYYDMVAARK             | 28 | 2315  | 1.43 | 0.18 | 13  |
| 22 T22B11.5          | VRAEAFYAGDEK           | 17 | 2096  | 1.50 | 0.48 | 32  |
| 10 T22B11.5          | YAGRLPSSSPATGNK        | 36 | 1686  | 1.55 | 0.10 | 6   |
| 22 T22B11.5          | YQGAEILWAQEEHK         | 60 | 4338  | 1.56 | 0.11 | 7   |
| 22 T22B11.5          | LPSTGIEQENIEQIIGK      | 34 | 1465  | 1.61 | 0.22 | 14  |
| 22 T22B11.5          | VRAEAFYAGDEK           | 12 | 2434  | 1.70 | 0.06 | 4   |
| 10 T22B11.5          | IAVVANPSHLEAVDPVVMGK   | 46 | 3221  | 1.73 | 0.13 | 7   |
| 10 T22B11.5          | YQGAEILWAQEEHK         | 55 | 2385  | 1.74 | 0.09 | 5   |
| 22 T22B11.5          | VRAEAFYAGDEK           | 17 | 3369  | 1.75 | 0.27 | 15  |
| 22 T22B11.5          | VRAEAFYAGDEK           | 14 | 2880  | 1.79 | 0.21 | 12  |
| 22 T22B11.5          | VRAEAFYAGDEK           | 15 | 2700  | 1.80 | 0.37 | 21  |
| 10 T22B11.5          | VRAEAFYAGDEK           | 12 | 2587  | 1.85 | 0.07 | 4   |
| 10 T22B11.5          | VYYDMVAARK             | 11 | 693   | 1.92 | 0.26 | 13  |
| 1 T22B11.5           | YAGRLPSSSPATGNK        | 19 | 577   | 1.96 | 0.17 | 9   |
| 1 T22B11.5           | YAGRLPSSSPATGNK        | 29 | 519   | 1.99 | 0.16 | 8   |
| 10 T22B11.5          | VYYDMVAARK             | 29 | 3349  | 2.08 | 0.12 | 6   |
| 10 T22B11.5          | YAGRLPSSSPATGNK        | 52 | 2315  | 2.10 | 0.18 | 9   |
| 10 T22B11.5          | LPSTGIEQENIEQIIGK      | 59 | 1918  | 2.12 | 0.24 | 11  |
| 10 T22B11.5          | VRAEAFYAGDEK           | 18 | 2902  | 2.16 | 0.04 | 2   |
| 10 T22B11.5          | VRAEAFYAGDEK           | 22 | 4227  | 2.32 | 0.18 | 8   |
| 10 T22B11.5          | YAGRLPSSSPATGNK        | 42 | 2286  | 2.34 | 0.19 | 8   |
| 10 T22B11.5          | VYYDMVAARK             | 27 | 2014  | 2.46 | 0.06 | 2   |
| 10 T22B11.5          | YQGAEILWAQEEHK         | 47 | 4349  | 2.59 | 0.10 | 4   |
| 10 T22B11.5          | YQGAEILWAQEEHK         | 63 | 2086  | 2.70 | 0.17 | 6   |
| 10 T22B11.5          | YAGRLPSSSPATGNK        | 53 | 2363  | 3.20 | 0.05 | 2   |
| 22 T22B11.5          | YGSILEDAYENAQK         | 80 | 1163  | 3.57 | 0.19 | 5   |
| 10 T22B11.5          | YQGAEILWAQEEHK         | 68 | 3944  | 3.79 | 0.10 | 3   |
| 22 T22B11.5          | YGSILEDAYENAQK         | 72 | 1035  | 4.51 | 0.30 | 7   |
| 22 T22B11.5          | IAVVANPSHLEAVDPVVMGK   | 57 | 4575  | 4.91 | 0.20 | 4   |
| 22 T22B11.5          | IAVVANPSHLEAVDPVVMGK   | 62 | 4865  | 5.65 | 0.17 | 3   |
| 22 T22B11.5          | YAGRLPSSSPATGNK        | 54 | 2407  | 5.80 | 0.15 | 3   |
| 22 T22B11.5          | YAGRLPSSSPATGNK        | 60 | 1615  | 8.46 | 0.13 | 2   |
| 22 T22D1.10          | IAGRALLVTGEPGAGK       | 13 | 2624  | 0.66 | 0.18 | 27  |
| 22 T22D1.10          | IAGRALLVTGEPGAGK       | 24 | 3090  | 0.69 | 0.12 | 17  |
| 22 T22D1.10          | LQPTALDLLVK            | 32 | 1565  | 0.77 | 0.08 | 10  |
| 1 T22D1.10           | IAGRALLVTGEPGAGK       | 38 | 2143  | 0.92 | 0.10 | 11  |
| 1 T22D1.10           | TAIAIAISK              | 17 | 862   | 1.00 | 0.20 | 20  |
| 10 T22D1.10          | IAGRALLVTGEPGAGK       | 33 | 3283  | 1.09 | 0.19 | 18  |
| 10 T22D1.10          | IAGRALLVTGEPGAGK       | 18 | 3433  | 1.14 | 0.22 | 19  |
| 10 T22D1.10          | LQPTALDLLVK            | 27 | 1207  | 1.14 | 0.07 | 6   |
| 1 T22D1.10           | LQPTALDLLVK            | 30 | 761   | 1.30 | 0.08 | 6   |
| 10 T22D1.3a;T22D1.3b | FERRSTNAQLEGGVHSLHSFEK | 10 | 11571 | 1.28 | 0.19 | 15  |
| 10 T22D1.3a;T22D1.3b | HPHVQVIAGNVVTRAQAK     | 17 | 13668 | 2.17 | 0.17 | 8   |
| 10 T22D1.9           | LTQDIVSHHMK            | 12 | 10788 | 0.75 | 0.10 | 13  |
| 22 T22D1.9           | NEERGIVIFELK           | 10 | 4153  | 0.79 | 0.19 | 25  |
| 10 T22D1.9           | EIFTSIVAPDVK           | 40 | 1990  | 0.91 | 0.14 | 15  |
| 22 T22D1.9           | EIFTSIVAPDVK           | 19 | 3949  | 1.12 | 0.24 | 21  |
| 22 T22D1.9           | EIFTSIVAPDVK           | 11 | 2035  | 1.17 | 0.05 | 5   |
| 10 T22D1.9           | EIFTSIVAPDVK           | 38 | 3840  | 1.29 | 0.15 | 11  |
| 1 T22D1.9            | EIFTSIVAPDVK           | 27 | 1325  | 1.39 | 0.04 | 3   |
| 10 T22D1.9           | EIFTSIVAPDVK           | 35 | 3111  | 1.44 | 0.06 | 4   |
| 22 T22E5.5           | EQIEQELRELK            | 27 | 2885  | 0.82 | 0.12 | 15  |
| 22 T22E5.5           | EQIEQELRELK            | 35 | 3547  | 1.07 | 0.11 | 10  |
| 22 T22E5.5           | EQIEQELRELK            | 23 | 2272  | 1.28 | 0.14 | 11  |
| 1 T22F3.3a           | AAPGYHMAK              | 25 | 6236  | 0.24 | 0.14 | 58  |
| 1 T22F3.3a           | AENHFHLK               | 33 | 1539  | 0.50 | 0.54 | 110 |
| 1 T22F3.3a           | RTVLYGGK               | 14 | 2541  | 0.66 | 0.19 | 29  |
| 1 T22F3.3a           | EYANDAGFLDSIRRVK       | 10 | 1660  | 0.70 | 0.07 | 10  |
| 1 T22F3.3a           | AAPGYHMAK              | 14 | 3815  | 0.90 | 0.30 | 34  |
| 1 T22F3.3a           | RTVLYGGK               | 24 | 1938  | 0.96 | 0.18 | 19  |
| 1 T22F3.3a           | RTVLYGGK               | 14 | 720   | 0.97 | 0.10 | 10  |
| 1 T22F3.3a           | EYANDAGFLDSIRRVK       | 17 | 4693  | 1.04 | 0.13 | 13  |

|                      |                           |    |       |       |      |     |
|----------------------|---------------------------|----|-------|-------|------|-----|
| 1 T22F3.3a           | RGYSSQEFIDK               | 25 | 1250  | 1.08  | 0.14 | 13  |
| 1 T22F3.3a           | EYANDAGFLDSIRRVK          | 44 | 3781  | 1.13  | 0.14 | 13  |
| 1 T22F3.3a           | RTVLYGGK                  | 25 | 4284  | 1.31  | 0.11 | 8   |
| 1 T22F3.3a           | ARPEYMLPVNFYGK            | 14 | 2244  | 1.43  | 0.08 | 6   |
| 1 T22F3.3a           | RTVLYGGK                  | 39 | 3714  | 1.44  | 0.09 | 6   |
| 1 T22F3.3a           | ARPEYMLPVNFYGK            | 16 | 426   | 1.46  | 0.19 | 13  |
| 1 T22F3.3a           | RTVLYGGK                  | 42 | 4313  | 1.62  | 0.24 | 15  |
| 1 T22F3.3a           | RTVLYGGK                  | 32 | 3283  | 1.88  | 0.16 | 9   |
| 1 T22F3.3a           | QIIEQIEGGMFTPEDPDQLK      | 46 | 1506  | 2.07  | 0.33 | 16  |
| 1 T22F3.3a           | RTVLYGGK                  | 34 | 1238  | 2.37  | 0.14 | 6   |
| 1 T22F3.3a           | RTVLYGGK                  | 25 | 1778  | 2.86  | 0.31 | 11  |
| 1 T22F3.3a           | QIIEQIEGGMFTPEDPDQLK      | 25 | 1131  | 3.22  | 0.26 | 8   |
| 22 T22F3.3b;T22F3.3a | ELRLK                     | 15 | 3181  | 0.10  | 0.15 | 143 |
| 10 T22F3.3b;T22F3.3a | ENPNIDMVK                 | 19 | 3890  | 0.25  | 0.28 | 112 |
| 10 T22F3.3b;T22F3.3a | ENPNIDMVK                 | 25 | 3925  | 0.26  | 0.23 | 89  |
| 10 T22F3.3b;T22F3.3a | SSTFRDFYEFYPDRFQNK        | 10 | 3122  | 0.27  | 0.34 | 128 |
| 10 T22F3.3b;T22F3.3a | ENPNIDMVK                 | 12 | 3649  | 0.31  | 0.13 | 43  |
| 10 T22F3.3b;T22F3.3a | IGESWITNLDELQK            | 57 | 624   | 0.31  | 0.23 | 74  |
| 10 T22F3.3b;T22F3.3a | IGESWITNLDELQK            | 52 | 877   | 0.35  | 0.20 | 58  |
| 7 T22F3.3b;T22F3.3a  | RTVLYGGK                  | 21 | 1185  | 0.39  | 0.14 | 36  |
| 22 T22F3.3b;T22F3.3a | IGESWITNLDELQK            | 55 | 1023  | 0.40  | 0.07 | 18  |
| 10 T22F3.3b;T22F3.3a | IGESWITNLDELQK            | 18 | 419   | 0.43  | 0.21 | 48  |
| 10 T22F3.3b;T22F3.3a | IGESWITNLDELQK            | 18 | 589   | 0.52  | 0.25 | 48  |
| 22 T22F3.3b;T22F3.3a | VSATFRDQEK                | 17 | 3233  | 0.53  | 0.19 | 36  |
| 10 T22F3.3b;T22F3.3a | ENPNIDMVK                 | 26 | 3722  | 0.58  | 0.15 | 26  |
| 22 T22F3.3b;T22F3.3a | IGESWITNLDELQK            | 62 | 1020  | 0.59  | 0.21 | 36  |
| 10 T22F3.3b;T22F3.3a | VIFLENYRVSMAEK            | 10 | 1574  | 0.60  | 0.17 | 29  |
| 10 T22F3.3b;T22F3.3a | ARPEYMLPVNFYGK            | 23 | 811   | 0.60  | 0.13 | 21  |
| 22 T22F3.3b;T22F3.3a | RTVLYGGK                  | 16 | 1252  | 0.60  | 0.37 | 61  |
| 7 T22F3.3b;T22F3.3a  | EYANDAGFLDSIRRVK          | 20 | 6504  | 0.62  | 0.46 | 74  |
| 10 T22F3.3b;T22F3.3a | ARPEYMLPVNFYGK            | 21 | 487   | 0.64  | 0.14 | 23  |
| 10 T22F3.3b;T22F3.3a | EYANDAGFLDSIRRVK          | 30 | 7688  | 0.64  | 0.29 | 45  |
| 10 T22F3.3b;T22F3.3a | ENPNIDMVK                 | 30 | 3221  | 0.64  | 0.10 | 15  |
| 22 T22F3.3b;T22F3.3a | IGESWITNLDELQK            | 38 | 945   | 0.69  | 0.20 | 28  |
| 10 T22F3.3b;T22F3.3a | RTVLYGGK                  | 37 | 4267  | 0.70  | 0.18 | 26  |
| 10 T22F3.3b;T22F3.3a | AENHFHLK                  | 42 | 3509  | 0.70  | 0.23 | 33  |
| 22 T22F3.3b;T22F3.3a | VSATFRDQEK                | 26 | 4201  | 0.72  | 0.06 | 8   |
| 22 T22F3.3b;T22F3.3a | VSATFRDQEK                | 19 | 3864  | 0.72  | 0.14 | 19  |
| 22 T22F3.3b;T22F3.3a | ARPEYMLPVNFYGK            | 11 | 714   | 0.73  | 0.33 | 45  |
| 10 T22F3.3b;T22F3.3a | VSATFRDQEK                | 11 | 9658  | 0.73  | 0.38 | 52  |
| 10 T22F3.3b;T22F3.3a | RTVLYGGK                  | 35 | 2816  | 0.74  | 0.07 | 10  |
| 22 T22F3.3b;T22F3.3a | IGESWITNLDELQK            | 48 | 1076  | 0.77  | 0.08 | 11  |
| 10 T22F3.3b;T22F3.3a | AAPGYHMAK                 | 18 | 16305 | 0.77  | 0.16 | 21  |
| 10 T22F3.3b;T22F3.3a | ARPEYMLPVNFYGK            | 13 | 557   | 0.78  | 0.23 | 29  |
| 10 T22F3.3b;T22F3.3a | VSATFRDQEK                | 12 | 3734  | 0.85  | 0.17 | 21  |
| 22 T22F3.3b;T22F3.3a | ENPNIDMVK                 | 12 | 3268  | 0.89  | 0.19 | 22  |
| 10 T22F3.3b;T22F3.3a | RGYSSQEFIDK               | 15 | 3395  | 0.89  | 0.12 | 14  |
| 10 T22F3.3b;T22F3.3a | VSATFRDQEK                | 12 | 2679  | 0.91  | 0.29 | 32  |
| 10 T22F3.3b;T22F3.3a | RGYSSQEFIDK               | 57 | 4991  | 0.91  | 0.11 | 12  |
| 22 T22F3.3b;T22F3.3a | RGYSSQEFIDK               | 19 | 6065  | 0.92  | 0.11 | 12  |
| 7 T22F3.3b;T22F3.3a  | RGYSSQEFIDK               | 32 | 2877  | 0.97  | 0.15 | 15  |
| 10 T22F3.3b;T22F3.3a | AAPGYHMAK                 | 30 | 14067 | 0.99  | 0.20 | 20  |
| 7 T22F3.3b;T22F3.3a  | RGYSSQEFIDK               | 49 | 2812  | 1.01  | 0.14 | 14  |
| 7 T22F3.3b;T22F3.3a  | RGYSSQEFIDK               | 46 | 4059  | 1.03  | 0.09 | 8   |
| 10 T22F3.3b;T22F3.3a | RTVLYGGK                  | 35 | 7388  | 1.03  | 0.10 | 10  |
| 22 T22F3.3b;T22F3.3a | SSTFRDFYEFYPDRFQNK        | 11 | 1742  | 1.04  | 0.14 | 14  |
| 10 T22F3.3b;T22F3.3a | RGYSSQEFIDK               | 29 | 3515  | 1.05  | 0.14 | 14  |
| 22 T22F3.3b;T22F3.3a | RGYSSQEFIDK               | 28 | 4816  | 1.07  | 0.23 | 22  |
| 10 T22F3.3b;T22F3.3a | AENHFHLK                  | 37 | 4504  | 1.08  | 0.27 | 25  |
| 22 T22F3.3b;T22F3.3a | RTVLYGGK                  | 18 | 5642  | 1.08  | 0.14 | 13  |
| 22 T22F3.3b;T22F3.3a | QIIEQIEGGMFTPEDPDQLK      | 21 | 1888  | 1.12  | 0.19 | 17  |
| 10 T22F3.3b;T22F3.3a | QISVRGIAQVENVSNIK         | 26 | 1865  | 1.17  | 0.11 | 9   |
| 7 T22F3.3b;T22F3.3a  | RGYSSQEFIDK               | 21 | 2975  | 1.26  | 0.11 | 9   |
| 10 T22F3.3b;T22F3.3a | RTVLYGGK                  | 16 | 5559  | 1.30  | 0.09 | 7   |
| 10 T22F3.3b;T22F3.3a | RTVLYGGK                  | 31 | 3720  | 1.31  | 0.13 | 10  |
| 10 T22F3.3b;T22F3.3a | AAPGYHMAK                 | 38 | 16656 | 1.38  | 0.11 | 8   |
| 22 T22F3.3b;T22F3.3a | SSTFRDFYEFYPDRFQNK        | 12 | 1987  | 1.42  | 0.17 | 12  |
| 7 T22F3.3b;T22F3.3a  | RGYSSQEFIDK               | 27 | 2245  | 1.45  | 0.21 | 15  |
| 10 T22F3.3b;T22F3.3a | QISVRGIAQVENVSNIK         | 14 | 1888  | 1.47  | 0.19 | 13  |
| 22 T22F3.3b;T22F3.3a | ARPEYMLPVNFYGK            | 23 | 494   | 1.63  | 0.20 | 12  |
| 7 T22F3.3b;T22F3.3a  | RGYSSQEFIDK               | 17 | 2791  | 1.64  | 0.12 | 7   |
| 10 T22F3.3b;T22F3.3a | RTVLYGGK                  | 32 | 7146  | 1.80  | 0.13 | 7   |
| 10 T22F3.3b;T22F3.3a | RTVLYGGK                  | 19 | 2441  | 1.85  | 0.08 | 4   |
| 22 T22F3.3b;T22F3.3a | RTVLYGGK                  | 27 | 5445  | 1.94  | 0.13 | 7   |
| 22 T22F3.3b;T22F3.3a | IIPASDLSEQISTAGTEASGTGNMK | 20 | 3032  | 1.96  | 0.37 | 19  |
| 7 T22F3.3b;T22F3.3a  | RTVLYGGK                  | 25 | 8100  | 2.01  | 0.06 | 3   |
| 10 T22F3.3b;T22F3.3a | RTVLYGGK                  | 26 | 4113  | 2.22  | 0.11 | 5   |
| 7 T22F3.3b;T22F3.3a  | RTVLYGGK                  | 27 | 6946  | 2.25  | 0.43 | 19  |
| 7 T22F3.3b;T22F3.3a  | RTVLYGGK                  | 23 | 1998  | 2.39  | 0.16 | 7   |
| 7 T22F3.3b;T22F3.3a  | RTVLYGGK                  | 28 | 6510  | 2.63  | 0.09 | 4   |
| 22 T22F3.3b;T22F3.3a | RTVLYGGK                  | 23 | 9180  | 2.99  | 0.11 | 4   |
| 22 T22F3.3b;T22F3.3a | RTVLYGGK                  | 28 | 8093  | 3.23  | 0.10 | 3   |
| 10 T22F3.3b;T22F3.3a | RTVLYGGK                  | 35 | 9680  | 3.40  | 0.14 | 4   |
| 10 T22F3.3b;T22F3.3a | RTVLYGGK                  | 34 | 7892  | 3.85  | 0.12 | 3   |
| 7 T22F3.3b;T22F3.3a  | RTVLYGGK                  | 27 | 3450  | 4.51  | 0.16 | 3   |
| 22 T22F3.3b;T22F3.3a | QIIEQIEGGMFTPEDPDQLK      | 50 | 1341  | 4.80  | 0.16 | 3   |
| 22 T22F3.3b;T22F3.3a | RTVLYGGK                  | 50 | 11127 | 20.45 | 0.32 | 2   |
| 10 T22F3.4           | YDGIILPPKPK               | 48 | 34791 | 0.31  | 0.07 | 24  |
| 10 T22F3.4           | VLEQLTGQTPVFSK            | 39 | 2984  | 0.36  | 0.07 | 20  |
| 7 T22F3.4            | YDGIILPPKPK               | 41 | 27979 | 0.44  | 0.19 | 43  |
| 7 T22F3.4            | YDGIILPPKPK               | 28 | 13625 | 0.46  | 0.11 | 23  |
| 1 T22F3.4            | VLEQLTGQTPVFSK            | 26 | 610   | 0.47  | 0.05 | 10  |
| 7 T22F3.4            | YDGIILPPKPK               | 41 | 26477 | 0.49  | 0.24 | 49  |
| 7 T22F3.4            | YDGIILPPKPK               | 25 | 10163 | 0.58  | 0.32 | 55  |
| 10 T22F3.4           | YDGIILPPKPK               | 52 | 24831 | 0.59  | 0.23 | 39  |
| 10 T22F3.4           | IAVHCTVRGPK               | 12 | 13466 | 0.63  | 0.29 | 47  |
| 10 T22F3.4           | VLEQLTGQTPVFSK            | 45 | 4270  | 0.70  | 0.18 | 26  |
| 7 T22F3.4            | VLEQLTGQTPVFSK            | 52 | 7160  | 1.09  | 0.11 | 10  |
| 10 T22F3.4           | VLEQLTGQTPVFSK            | 39 | 2879  | 1.17  | 0.18 | 15  |
| 10 T22F3.4           | IAVHCTVRGPK               | 12 | 19755 | 1.27  | 0.41 | 32  |
| 7 T22F3.4            | YDGIILPPKPK               | 17 | 5425  | 1.39  | 0.05 | 4   |

|                                        |                         |    |       |      |      |      |
|----------------------------------------|-------------------------|----|-------|------|------|------|
| 1 T22F3.4                              | VLEQLTGQTPVFSK          | 47 | 2266  | 1.40 | 0.12 | 8    |
| 1 T22F3.4                              | VLEQLTGQTPVFSK          | 21 | 1649  | 1.51 | 0.10 | 7    |
| 1 T22F3.4                              | YDGII LPPKPK            | 43 | 10216 | 5.60 | 0.43 | 8    |
| 1 T22F3.4                              | YDGII LPPKPK            | 33 | 9009  | 6.19 | 0.60 | 10   |
| 1 T22H6.2a;T22H6.2b                    | SAGLDPQLLNRLK           | 15 | 2238  | 0.46 | 0.23 | 51   |
| 10 T23D8.4                             | VWNLFHNAETVK            | 19 | 448   | 0.17 | 0.17 | 103  |
| 22 T23D8.4                             | VWNLFHNAETVK            | 22 | 788   | 0.24 | 0.22 | 93   |
| 22 T23D8.4                             | ELLAQAVGTRQHEK          | 24 | 8562  | 0.32 | 0.18 | 57   |
| 10 T23D8.4                             | DVHSIISK                | 20 | 2008  | 0.33 | 0.19 | 59   |
| 22 T23D8.4                             | LLEVSEEK                | 37 | 2070  | 0.54 | 0.13 | 24   |
| 22 T23D8.4                             | VWNLFHNAETVK            | 40 | 2046  | 0.64 | 0.19 | 30   |
| 22 T23D8.4                             | LLEVSEEK                | 16 | 589   | 0.66 | 0.34 | 52   |
| 22 T23D8.4                             | DLNRLLTGFD SLAK         | 23 | 1219  | 0.82 | 0.32 | 40   |
| 10 T23D8.4                             | LSVTYAEEDENLK           | 43 | 1677  | 0.89 | 0.21 | 24   |
| 10 T23D8.4                             | LSVTYAEEDENLK           | 45 | 1737  | 0.93 | 0.22 | 23   |
| 10 T23D8.4                             | LADLFELSK               | 14 | 350   | 1.00 | 0.13 | 13   |
| 10 T23D8.4                             | VWNLFHNAETVK            | 49 | 2562  | 1.04 | 0.10 | 10   |
| 1 T23D8.4                              | DVHSIISK                | 11 | 1608  | 1.07 | 0.15 | 14   |
| 10 T23D8.4                             | VWNLFHNAETVK            | 27 | 2126  | 1.11 | 0.12 | 11   |
| 22 T23D8.4                             | ELLAQAVGTRQHEK          | 13 | 8128  | 1.14 | 0.12 | 11   |
| 10 T23D8.4                             | ELLAQAVGTRQHEK          | 18 | 8430  | 1.27 | 0.11 | 9    |
| 10 T23D8.4                             | ELLAQAVGTRQHEK          | 15 | 6880  | 1.76 | 0.06 | 3    |
| 22 T23D8.4                             | LSVTYAEEDENLK           | 20 | 1186  | 2.00 | 0.14 | 7    |
| 10 T23D8.4                             | ELLAQAVGTRQHEK          | 18 | 9052  | 2.05 | 0.27 | 13   |
| 22 T23D8.4                             | DLNRLLTGFD SLAK         | 25 | 772   | 2.23 | 0.16 | 7    |
| 10 T23D8.4                             | ELLAQAVGTRQHEK          | 16 | 6073  | 2.26 | 0.19 | 8    |
| 10 T23D8.4                             | YVELRNDSGIFDK           | 13 | 873   | 2.44 | 0.17 | 7    |
| 10 T23D8.4                             | ELLAQAVGTRQHEK          | 15 | 8562  | 2.76 | 0.10 | 4    |
| 10 T23D8.4                             | ELLAQAVGTRQHEK          | 27 | 8119  | 2.79 | 0.09 | 3    |
| 10 T23D8.4                             | DVHSIISK                | 20 | 2637  | 2.91 | 0.29 | 10   |
| 10 T23D8.4                             | DVHSIISK                | 23 | 2733  | 3.10 | 0.10 | 3    |
| 10 T23D8.4                             | ELLAQAVGTRQHEK          | 13 | 6292  | 3.32 | 0.11 | 3    |
| 22 T23D8.4                             | DLNRLLTGFD SLAK         | 25 | 1232  | 3.54 | 0.02 | 1    |
| 22 T23E7.2c;T23E7.2a;T23E7.2b;T23E7.2e | QSV PPTPK               | 11 | 6370  | 0.08 | 0.47 | 578  |
| 1 T23E7.2c;T23E7.2e                    | QSV PPTPK               | 14 | 2095  | 0.17 | 0.38 | 215  |
| 7 T23F11.1                             | VSQYSGINLHK             | 14 | 6309  | 1.00 | 0.10 | 10   |
| 10 T23G5.1                             | SAGGIGLNVHK             | 50 | 8564  | 1.41 | 0.11 | 8    |
| 22 T24H7.2                             | TLFAANSVYP THPK         | 44 | 1883  | 0.52 | 0.11 | 21   |
| 1 T24H7.2                              | RRNTFFEVD DAPK          | 13 | 2948  | 1.02 | 0.09 | 9    |
| 22 T24H7.2                             | RRNTFFEVD DAPK          | 14 | 1917  | 1.08 | 0.26 | 24   |
| 1 T24H7.2                              | TLFAANSVYP THPK         | 35 | 716   | 1.33 | 0.07 | 6    |
| 1 T24H7.2                              | RRNTFFEVD DAPK          | 20 | 1210  | 1.43 | 0.28 | 19   |
| 1 T24H7.2                              | STQHPSFELFK             | 12 | 976   | 2.04 | 0.17 | 8    |
| 1 T24H7.2                              | TLFAANSVYP THPK         | 48 | 772   | 2.22 | 0.20 | 9    |
| 22 T24H7.2                             | TLFAANSVYP THPK         | 79 | 2471  | 2.33 | 0.19 | 8    |
| 22 T24H7.2                             | STQHPSFELFK             | 19 | 2123  | 2.71 | 0.24 | 9    |
| 22 T24H7.2                             | RRNTFFEVD DAPK          | 28 | 3728  | 2.96 | 0.25 | 8    |
| 1 T24H7.2                              | TLFAANSVYP THPK         | 32 | 587   | 3.05 | 0.39 | 13   |
| 1 T24H7.2                              | TLFAANSVYP THPK         | 61 | 1025  | 3.19 | 0.22 | 7    |
| 22 T24H7.2                             | STQHPSFELFK             | 19 | 2545  | 3.39 | 0.22 | 6    |
| 10 T24H7.2;F30B5.1                     | VQEIVQK                 | 11 | 894   | 0.56 | 0.08 | 14   |
| 7 T24H7.2;F30B5.1                      | RRNTFFEVD DAPK          | 12 | 4541  | 0.71 | 0.13 | 19   |
| 10 T24H7.2;F30B5.1                     | QVLSANAEHFAQIESAHEDIDAK | 11 | 1758  | 0.77 | 0.21 | 27   |
| 10 T24H7.2;F30B5.1                     | STQHPSFELFK             | 10 | 2521  | 0.87 | 0.15 | 17   |
| 10 T24H7.2;F30B5.1                     | DFTDNLLELK              | 30 | 706   | 0.93 | 0.26 | 27   |
| 10 T24H7.2;F30B5.1                     | ITLDDLAK                | 10 | 453   | 0.96 | 0.17 | 18   |
| 10 T24H7.2;F30B5.1                     | RRNTFFEVD DAPK          | 33 | 6614  | 1.06 | 0.21 | 20   |
| 10 T24H7.2;F30B5.1                     | DFTDNLLELK              | 22 | 592   | 1.10 | 0.25 | 23   |
| 10 T24H7.2;F30B5.1                     | IWVTDVRK                | 26 | 2038  | 1.30 | 0.17 | 13   |
| 10 T24H7.2;F30B5.1                     | TLFAANSVYP THPK         | 87 | 4030  | 1.36 | 0.11 | 8    |
| 10 T24H7.2;F30B5.1                     | STQHPSFELFK             | 22 | 2349  | 1.40 | 0.12 | 9    |
| 10 T24H7.2;F30B5.1                     | RRNTFFEVD DAPK          | 31 | 5500  | 1.58 | 0.18 | 12   |
| 10 T24H7.2;F30B5.1                     | TLFAANSVYP THPK         | 83 | 3542  | 1.59 | 0.13 | 8    |
| 7 T24H7.2;F30B5.1                      | TLFAANSVYP THPK         | 52 | 1045  | 1.98 | 0.05 | 3    |
| 7 T24H7.2;F30B5.1                      | TLFAANSVYP THPK         | 37 | 1150  | 2.19 | 0.10 | 5    |
| 22 T25B9.1                             | TGRGTAEAVGGRPDVINSTLGK  | 19 | 4997  | 0.55 | 0.13 | 23   |
| 22 T25B9.1                             | TGRGTAEAVGGRPDVINSTLGK  | 12 | 4661  | 0.73 | 0.27 | 37   |
| 22 T25B9.1                             | TERVIQGRQGV LVK         | 22 | 8160  | 0.80 | 0.24 | 30   |
| 22 T25B9.1                             | LAATMADELLK             | 28 | 1485  | 1.30 | 0.54 | 41   |
| 22 T25B9.1                             | HLDLGDLESK              | 35 | 7050  | 1.35 | 0.11 | 8    |
| 7 T25B9.9                              | LVDDFLANEAK             | 56 | 3302  | 0.04 | 0.43 | 1088 |
| 7 T25B9.9                              | LVDDFLANEAK             | 34 | 1541  | 0.07 | 0.35 | 521  |
| 22 T25B9.9                             | LVDDFLANEAK             | 26 | 2303  | 0.31 | 0.27 | 87   |
| 10 T25B9.9                             | QLSNLLDDFFTK            | 55 | 1095  | 0.32 | 0.21 | 66   |
| 22 T25B9.9                             | LVDDFLANEAK             | 34 | 2119  | 0.39 | 0.18 | 45   |
| 10 T25B9.9                             | QLSNLLDDFFTK            | 29 | 945   | 0.42 | 0.30 | 73   |
| 10 T25B9.9                             | QLSNLLDDFFTK            | 41 | 974   | 0.45 | 0.10 | 23   |
| 22 T25B9.9                             | LVDDFLANEAK             | 41 | 1258  | 0.47 | 0.36 | 78   |
| 7 T25B9.9                              | YRDEQGEP IVPK           | 19 | 1165  | 0.48 | 0.25 | 53   |
| 22 T25B9.9                             | YRDEQGEP IVPK           | 38 | 1720  | 0.50 | 0.07 | 14   |
| 10 T25B9.9                             | LVDDFLANEAK             | 16 | 1239  | 0.52 | 0.29 | 55   |
| 22 T25B9.9                             | AVELNHDQMAEVLDDWNK      | 11 | 2391  | 0.53 | 0.30 | 57   |
| 7 T25B9.9                              | LVDDFLANEAK             | 20 | 1103  | 0.53 | 0.21 | 40   |
| 7 T25B9.9                              | YRDEQGEP IVPK           | 12 | 1272  | 0.61 | 0.19 | 31   |
| 10 T25B9.9                             | MVHNGIEYGDMQLIAEAYHLLSK | 30 | 1191  | 0.65 | 0.21 | 32   |
| 10 T25B9.9                             | LVDDFLANEAK             | 41 | 1775  | 0.70 | 0.15 | 22   |
| 7 T25B9.9                              | LVDDFLANEAK             | 34 | 2269  | 0.71 | 0.20 | 28   |
| 22 T25B9.9                             | LVDDFLANEAK             | 21 | 2375  | 0.71 | 0.17 | 23   |
| 22 T25B9.9                             | RVFIK                   | 19 | 2523  | 0.72 | 0.06 | 8    |
| 22 T25B9.9                             | AVELNHDQMAEVLDDWNK      | 20 | 2671  | 0.75 | 0.19 | 25   |
| 7 T25B9.9                              | LVDDFLANEAK             | 72 | 3802  | 0.81 | 0.13 | 16   |
| 22 T25B9.9                             | AVELNHDQMAEVLDDWNK      | 19 | 2705  | 0.81 | 0.10 | 12   |
| 22 T25B9.9                             | AVELNHDQMAEVLDDWNK      | 12 | 3264  | 0.82 | 0.09 | 11   |
| 22 T25B9.9                             | YRDEQGEP IVPK           | 29 | 1562  | 0.85 | 0.16 | 19   |
| 22 T25B9.9                             | LVDDFLANEAK             | 31 | 1848  | 0.93 | 0.20 | 21   |
| 22 T25B9.9                             | QLPRPQVSPDTVVQDK        | 46 | 3693  | 0.93 | 0.18 | 19   |
| 1 T25B9.9                              | YRDEQGEP IVPK           | 12 | 5967  | 0.94 | 0.14 | 14   |
| 10 T25B9.9                             | MVHNGIEYGDMQLIAEAYHLLSK | 25 | 1460  | 0.96 | 0.22 | 23   |
| 22 T25B9.9                             | QLPRPQVSPDTVVQDK        | 53 | 3195  | 1.06 | 0.17 | 16   |
| 7 T25B9.9                              | YRDEQGEP IVPK           | 36 | 2107  | 1.08 | 0.14 | 13   |
| 7 T25B9.9                              | QLPRPQVSPDTVVQDK        | 10 | 5703  | 1.09 | 0.17 | 15   |

|                               |                    |     |        |      |      |     |
|-------------------------------|--------------------|-----|--------|------|------|-----|
| 1 T25B9.9                     | LVDDFLANEAK        | 43  | 2300   | 1.11 | 0.15 | 14  |
| 1 T25B9.9                     | QLPRPQVSPDTVQDK    | 37  | 1324   | 1.14 | 0.11 | 10  |
| 22 T25B9.9                    | QLPRPQVSPDTVQDK    | 33  | 1266   | 1.15 | 0.15 | 13  |
| 1 T25B9.9                     | QLPRPQVSPDTVQDK    | 30  | 2776   | 1.21 | 0.23 | 19  |
| 22 T25B9.9                    | QLPRPQVSPDTVQDK    | 16  | 6890   | 1.22 | 0.11 | 9   |
| 1 T25B9.9                     | YRDEQGEPIVPK       | 28  | 2518   | 1.28 | 0.12 | 10  |
| 7 T25B9.9                     | QLPRPQVSPDTVQDK    | 11  | 8609   | 1.29 | 0.13 | 10  |
| 10 T25B9.9                    | LVDDFLANEAK        | 39  | 2855   | 1.37 | 0.19 | 14  |
| 1 T25B9.9                     | LVDDFLANEAK        | 45  | 2497   | 1.41 | 0.10 | 7   |
| 10 T25B9.9                    | LVDDFLANEAK        | 27  | 1194   | 1.48 | 0.13 | 9   |
| 22 T25B9.9                    | YRDEQGEPIVPK       | 29  | 6225   | 1.67 | 0.06 | 4   |
| 10 T25B9.9                    | RVFIK              | 14  | 1805   | 1.80 | 0.05 | 3   |
| 10 T25B9.9                    | QLPRPQVSPDTVQDK    | 13  | 6826   | 2.08 | 0.15 | 7   |
| 10 T25B9.9                    | RVFIK              | 18  | 1886   | 2.37 | 0.10 | 4   |
| 10 T25B9.9                    | QLPRPQVSPDTVQDK    | 26  | 1838   | 2.43 | 0.15 | 6   |
| 10 T25B9.9                    | QLPRPQVSPDTVQDK    | 57  | 3581   | 2.47 | 0.18 | 7   |
| 7 T25B9.9                     | QLPRPQVSPDTVQDK    | 11  | 1798   | 4.36 | 0.23 | 5   |
| 10 T25B9.9                    | RVFIK              | 12  | 4611   | 5.76 | 0.15 | 3   |
| 10 T25B9.9                    | RVFIK              | 14  | 3281   | 6.67 | 0.27 | 4   |
| 7 T25C8.2                     | RGILTLK            | 21  | 15366  | 0.45 | 0.10 | 21  |
| 22 T25C8.2                    | EIQHLAPSTMK        | 38  | 12401  | 0.61 | 0.19 | 32  |
| 22 T25C8.2                    | EIQHLAPSTMK        | 36  | 12505  | 0.61 | 0.10 | 16  |
| 22 T25C8.2                    | EIQHLAPSTMK        | 35  | 7838   | 0.73 | 0.16 | 22  |
| 7 T25C8.2                     | RGILTLK            | 23  | 2850   | 0.74 | 0.06 | 8   |
| 7 T25C8.2                     | RGILTLK            | 11  | 5560   | 0.78 | 0.09 | 11  |
| 7 T25C8.2                     | RGILTLK            | 51  | 83516  | 0.83 | 0.09 | 11  |
| 7 T25C8.2                     | RGILTLK            | 31  | 76417  | 0.86 | 0.12 | 14  |
| 7 T25C8.2                     | RGILTLK            | 34  | 89008  | 0.96 | 0.11 | 12  |
| 10 T25C8.2                    | EIQHLAPSTMK        | 25  | 5505   | 1.00 | 0.13 | 13  |
| 7 T25C8.2                     | RGILTLK            | 13  | 3791   | 1.06 | 0.11 | 10  |
| 7 T25C8.2                     | IIAPPERK           | 33  | 9458   | 1.08 | 0.23 | 21  |
| 7 T25C8.2                     | RGILTLK            | 21  | 120051 | 1.09 | 0.08 | 7   |
| 7 T25C8.2                     | IIAPPERK           | 11  | 10429  | 1.12 | 0.20 | 18  |
| 7 T25C8.2                     | IIAPPERK           | 17  | 4125   | 1.20 | 0.27 | 22  |
| 22 T25C8.2                    | EIQHLAPSTMK        | 35  | 7210   | 1.23 | 0.16 | 13  |
| 7 T25C8.2                     | QEYDESGPSIVHRK     | 13  | 9856   | 1.32 | 0.10 | 8   |
| 7 T25C8.2                     | IIAPPERK           | 26  | 9544   | 1.48 | 0.08 | 5   |
| 7 T25C8.2                     | RGILTLK            | 13  | 2509   | 1.57 | 0.07 | 5   |
| 7 T25C8.2                     | RGILTLK            | 10  | 5288   | 1.60 | 0.10 | 6   |
| 7 T25C8.2                     | EIQHLAPSTMK        | 11  | 2550   | 1.68 | 0.17 | 10  |
| 7 T25C8.2                     | IIAPPERK           | 23  | 8914   | 1.72 | 0.10 | 6   |
| 7 T25C8.2                     | RGILTLK            | 13  | 10774  | 1.92 | 0.10 | 5   |
| 7 T25C8.2                     | IIAPPERK           | 18  | 4440   | 1.94 | 0.27 | 14  |
| 7 T25C8.2                     | RGILTLK            | 29  | 7210   | 1.96 | 0.15 | 7   |
| 7 T25C8.2                     | RGILTLK            | 15  | 6911   | 2.06 | 0.12 | 6   |
| 7 T25C8.2                     | IIAPPERK           | 14  | 2167   | 2.17 | 0.31 | 14  |
| 7 T25C8.2                     | RGILTLK            | 38  | 9963   | 2.22 | 0.08 | 3   |
| 7 T25C8.2                     | RGILTLK            | 19  | 6296   | 2.35 | 0.12 | 5   |
| 7 T25C8.2                     | RGILTLK            | 17  | 8499   | 2.53 | 0.10 | 4   |
| 7 T25C8.2                     | RGILTLK            | 17  | 6464   | 2.73 | 0.13 | 5   |
| 7 T25C8.2                     | RGILTLK            | 32  | 4583   | 2.73 | 0.06 | 2   |
| 7 T25C8.2                     | RGILTLK            | 35  | 11603  | 2.90 | 0.17 | 6   |
| 7 T25C8.2                     | IIAPPERK           | 16  | 4618   | 3.25 | 0.22 | 7   |
| 22 T25G12.5                   | AFTAFVVEGDTPLTRGRK | 34  | 7925   | 0.62 | 0.20 | 32  |
| 10 T25G12.5                   | FVADEVIPVAGEYDK    | 23  | 1697   | 0.70 | 0.30 | 43  |
| 10 T25G12.5                   | AFTAFVVEGDTPLTRGRK | 53  | 9313   | 0.74 | 0.24 | 32  |
| 22 T25G12.5                   | AFTAFVVEGDTPLTRGRK | 29  | 6461   | 0.76 | 0.15 | 20  |
| 22 T25G12.5                   | AFTAFVVEGDTPLTRGRK | 25  | 8099   | 0.76 | 0.11 | 15  |
| 10 T25G12.5                   | TMEYPWEIHK         | 25  | 1735   | 0.79 | 0.20 | 26  |
| 22 T25G12.5                   | AFTAFVVEGDTPLTRGRK | 49  | 9649   | 0.81 | 0.12 | 15  |
| 10 T25G12.5                   | FVADEVIPVAGEYDK    | 27  | 1938   | 0.82 | 0.12 | 15  |
| 22 T25G12.5                   | TMEYPWEIHK         | 21  | 1679   | 0.85 | 0.08 | 9   |
| 10 T25G12.5                   | TMEYPWEIHK         | 29  | 2198   | 0.86 | 0.16 | 19  |
| 22 T25G12.5                   | TMEYPWEIHK         | 25  | 1556   | 0.92 | 0.16 | 17  |
| 10 T25G12.5                   | AFTAFVVEGDTPLTRGRK | 61  | 7850   | 0.94 | 0.12 | 13  |
| 22 T25G12.5                   | FVADEVIPVAGEYDK    | 33  | 1983   | 1.01 | 0.15 | 15  |
| 7 T25G12.5                    | AFTAFVVEGDTPLTRGRK | 28  | 5040   | 1.21 | 0.23 | 19  |
| 7 T26C5.1                     | TAEESAMVDAFVDQFK   | 39  | 1194   | 0.66 | 0.14 | 22  |
| 7 T26C5.1                     | TAEESAMVDAFVDQFK   | 66  | 1939   | 0.66 | 0.18 | 27  |
| 22 T26C5.1                    | TAEESAMVDAFVDQFK   | 93  | 5011   | 0.67 | 0.11 | 17  |
| 22 T26C5.1                    | TAEESAMVDAFVDQFK   | 74  | 5192   | 0.78 | 0.12 | 16  |
| 1 T26C5.1                     | TAEESAMVDAFVDQFK   | 49  | 749    | 1.06 | 0.16 | 15  |
| 1 T26C5.1                     | TAEESAMVDAFVDQFK   | 33  | 646    | 1.43 | 0.12 | 8   |
| 10 T26C5.1                    | VLIPARDK           | 11  | 7820   | 2.36 | 0.06 | 3   |
| 10 T27A10.3a;T27A10.3b        | RIAQLHSSVPTNGK     | 36  | 5187   | 2.56 | 0.07 | 3   |
| 10 T27A10.3a;T27A10.3b        | RIAQLHSSVPTNGK     | 26  | 4205   | 3.54 | 0.30 | 8   |
| 1 T27A3.2                     | FAYNVDTGQK         | 14  | 387    | 0.92 | 0.31 | 34  |
| 10 T27A3.2                    | HFGLDPTK           | 15  | 2007   | 1.09 | 0.10 | 9   |
| 1 T27A3.2                     | RVAAGNHRDFSTSK     | 19  | 1140   | 1.39 | 0.11 | 8   |
| 10 T27A3.2                    | HFGLDPTK           | 15  | 7953   | 1.49 | 0.06 | 4   |
| 22 T27A3.2                    | HFGLDPTK           | 24  | 8192   | 1.70 | 0.09 | 5   |
| 22 T27A3.2                    | HFGLDPTK           | 17  | 4974   | 1.97 | 0.05 | 3   |
| 10 T27A3.2                    | RVAAGNHRDFSTSK     | 22  | 1064   | 2.08 | 0.20 | 10  |
| 7 T27A3.2                     | HFGLDPTK           | 17  | 2354   | 2.61 | 0.06 | 2   |
| 7 T27A3.2                     | HFGLDPTK           | 14  | 2456   | 2.70 | 0.17 | 6   |
| 7 T27A3.2                     | HFGLDPTK           | 37  | 2685   | 2.86 | 0.13 | 4   |
| 22 T27A3.2                    | RVAAGNHRDFSTSK     | 16  | 1059   | 2.97 | 0.16 | 5   |
| 1 T27E9.1a;T27E9.1c;T27E9.1b  | LLLQVQDASK         | 18  | 494    | 0.22 | 0.28 | 128 |
| 1 T27E9.1a;T27E9.1c;T27E9.1b  | LLLQVQDASK         | 46  | 3730   | 0.24 | 0.20 | 82  |
| 1 T27E9.1a;T27E9.1c;T27E9.1b  | LLLQVQDASK         | 48  | 3569   | 0.25 | 0.19 | 74  |
| 1 T27E9.1a;T27E9.1c;T27E9.1b  | FLIDLASGGTAAAVSK   | 32  | 331    | 0.30 | 0.24 | 78  |
| 22 T27E9.1a;T27E9.1c;T27E9.1b | AIFLEGLDK          | 29  | 497    | 0.32 | 0.45 | 140 |
| 1 T27E9.1a;T27E9.1c;T27E9.1b  | AIFLEGLDK          | 25  | 631    | 0.33 | 0.09 | 28  |
| 1 T27E9.1a;T27E9.1c;T27E9.1b  | LLLQVQDASK         | 15  | 434    | 0.37 | 0.04 | 11  |
| 10 T27E9.1a;T27E9.1c;T27E9.1b | AIFLEGLDK          | 31  | 3044   | 0.40 | 0.15 | 39  |
| 10 T27E9.1a;T27E9.1c;T27E9.1b | FLIDLASGGTAAAVSK   | 117 | 1543   | 0.40 | 0.25 | 62  |
| 1 T27E9.1a;T27E9.1c;T27E9.1b  | LLLQVQDASK         | 18  | 613    | 0.42 | 0.16 | 38  |
| 1 T27E9.1a;T27E9.1c;T27E9.1b  | AIFLEGLDK          | 12  | 312    | 0.44 | 0.18 | 40  |
| 1 T27E9.1a;T27E9.1c;T27E9.1b  | AIFLEGLDK          | 19  | 229    | 0.50 | 0.15 | 30  |
| 10 T27E9.1a;T27E9.1c;T27E9.1b | AIFLEGLDK          | 23  | 1075   | 0.53 | 0.13 | 24  |
| 1 T27E9.1a;T27E9.1c;T27E9.1b  | TAVAPIERVK         | 17  | 7801   | 0.55 | 0.09 | 17  |

|                               |                        |     |       |      |      |    |
|-------------------------------|------------------------|-----|-------|------|------|----|
| 10 T27E9.1a;T27E9.1c;T27E9.1b | FLIDLASGGTAAAVSK       | 110 | 1507  | 0.56 | 0.26 | 46 |
| 22 T27E9.1a;T27E9.1c;T27E9.1b | AIFLEGLDK              | 27  | 1141  | 0.67 | 0.19 | 28 |
| 22 T27E9.1a;T27E9.1c;T27E9.1b | AIFLEGLDK              | 13  | 587   | 0.68 | 0.16 | 24 |
| 1 T27E9.1a;T27E9.1c;T27E9.1b  | TAVAPIERVK             | 21  | 8187  | 0.73 | 0.07 | 10 |
| 10 T27E9.1a;T27E9.1c;T27E9.1b | AIFLEGLDK              | 12  | 526   | 0.74 | 0.17 | 24 |
| 22 T27E9.1a;T27E9.1c;T27E9.1b | IIQNEGMSAMFK           | 28  | 1133  | 0.78 | 0.21 | 27 |
| 1 T27E9.1a;T27E9.1c;T27E9.1b  | AIFLEGLDK              | 29  | 776   | 0.79 | 0.06 | 8  |
| 1 T27E9.1a;T27E9.1c;T27E9.1b  | AIFLEGLDK              | 16  | 238   | 0.81 | 0.20 | 25 |
| 22 T27E9.1a;T27E9.1c;T27E9.1b | AIFLEGLDK              | 30  | 1578  | 0.81 | 0.19 | 24 |
| 10 T27E9.1a;T27E9.1c;T27E9.1b | GIMDVLRVPK             | 25  | 2790  | 0.83 | 0.18 | 22 |
| 22 T27E9.1a;T27E9.1c;T27E9.1b | AIFLEGLDK              | 11  | 489   | 0.87 | 0.09 | 11 |
| 7 T27E9.1a;T27E9.1c;T27E9.1b  | AIFLEGLDK              | 22  | 2195  | 0.99 | 0.10 | 10 |
| 1 T27E9.1a;T27E9.1c;T27E9.1b  | IIQNEGMSAMFK           | 12  | 1088  | 0.99 | 0.19 | 19 |
| 10 T27E9.1a;T27E9.1c;T27E9.1b | FLIDLASGGTAAAVSK       | 120 | 1450  | 1.04 | 0.15 | 15 |
| 1 T27E9.1a;T27E9.1c;T27E9.1b  | GIMDVLRVPK             | 17  | 1504  | 1.06 | 0.17 | 16 |
| 1 T27E9.1a;T27E9.1c;T27E9.1b  | FLIDLASGGTAAAVSK       | 95  | 1062  | 1.25 | 0.06 | 5  |
| 10 T27E9.1a;T27E9.1c;T27E9.1b | AIFLEGLDK              | 38  | 1550  | 1.27 | 0.19 | 15 |
| 7 T27E9.1a;T27E9.1c;T27E9.1b  | AIFLEGLDK              | 27  | 1836  | 1.28 | 0.09 | 7  |
| 22 T27E9.1a;T27E9.1c;T27E9.1b | GIMDVLRVPK             | 37  | 2026  | 1.29 | 0.11 | 9  |
| 22 T27E9.1a;T27E9.1c;T27E9.1b | GIMDVLRVPK             | 29  | 2082  | 1.30 | 0.28 | 21 |
| 22 T27E9.1a;T27E9.1c;T27E9.1b | FLIDLASGGTAAAVSK       | 95  | 693   | 1.30 | 0.17 | 13 |
| 22 T27E9.1a;T27E9.1c;T27E9.1b | IIQNEGMSAMFK           | 31  | 1237  | 1.31 | 0.19 | 14 |
| 10 T27E9.1a;T27E9.1c;T27E9.1b | FLIDLASGGTAAAVSK       | 99  | 1146  | 1.40 | 0.15 | 11 |
| 7 T27E9.1a;T27E9.1c;T27E9.1b  | TAVAPIERVK             | 23  | 6731  | 1.41 | 0.09 | 6  |
| 1 T27E9.1a;T27E9.1c;T27E9.1b  | FLIDLASGGTAAAVSK       | 109 | 1069  | 1.42 | 0.15 | 11 |
| 7 T27E9.1a;T27E9.1c;T27E9.1b  | AIFLEGLDK              | 21  | 1892  | 1.43 | 0.11 | 8  |
| 1 T27E9.1a;T27E9.1c;T27E9.1b  | LLLQVQDASK             | 13  | 858   | 1.46 | 0.14 | 10 |
| 7 T27E9.1a;T27E9.1c;T27E9.1b  | FLIDLASGGTAAAVSK       | 116 | 1866  | 1.56 | 0.12 | 7  |
| 7 T27E9.1a;T27E9.1c;T27E9.1b  | TAVAPIERVK             | 14  | 5526  | 1.56 | 0.07 | 5  |
| 22 T27E9.1a;T27E9.1c;T27E9.1b | FLIDLASGGTAAAVSK       | 70  | 699   | 1.64 | 0.15 | 9  |
| 22 T27E9.1a;T27E9.1c;T27E9.1b | AIFLEGLDK              | 42  | 1657  | 1.74 | 0.13 | 7  |
| 7 T27E9.1a;T27E9.1c;T27E9.1b  | AIFLEGLDK              | 12  | 1323  | 1.77 | 0.05 | 3  |
| 10 T27E9.1a;T27E9.1c;T27E9.1b | TAVAPIERVK             | 14  | 8425  | 1.90 | 0.12 | 6  |
| 7 T27E9.1a;T27E9.1c;T27E9.1b  | LLLQVQDASK             | 17  | 1938  | 1.92 | 0.09 | 5  |
| 7 T27E9.1a;T27E9.1c;T27E9.1b  | FLIDLASGGTAAAVSK       | 119 | 1357  | 1.95 | 0.17 | 9  |
| 10 T27E9.1a;T27E9.1c;T27E9.1b | AIFLEGLDK              | 24  | 1567  | 2.11 | 0.21 | 10 |
| 22 T27E9.1a;T27E9.1c;T27E9.1b | AIFLEGLDK              | 39  | 1759  | 2.12 | 0.18 | 9  |
| 22 T27E9.1a;T27E9.1c;T27E9.1b | AIFLEGLDK              | 23  | 983   | 2.13 | 0.09 | 4  |
| 10 T27E9.1a;T27E9.1c;T27E9.1b | AIFLEGLDK              | 20  | 1006  | 2.16 | 0.07 | 3  |
| 22 T27E9.1a;T27E9.1c;T27E9.1b | LLLQVQDASK             | 46  | 5622  | 2.16 | 0.11 | 5  |
| 22 T27E9.1a;T27E9.1c;T27E9.1b | AIFLEGLDK              | 35  | 1225  | 2.33 | 0.15 | 6  |
| 22 T27E9.1a;T27E9.1c;T27E9.1b | LLLQVQDASK             | 47  | 3665  | 2.59 | 0.09 | 4  |
| 22 T27E9.1a;T27E9.1c;T27E9.1b | GIMDVLRVPK             | 11  | 1223  | 2.59 | 0.14 | 5  |
| 22 T27E9.1a;T27E9.1c;T27E9.1b | TAVAPIERVK             | 14  | 7499  | 3.04 | 0.05 | 2  |
| 22 T27E9.1a;T27E9.1c;T27E9.1b | TAVAPIERVK             | 46  | 6658  | 4.12 | 0.09 | 2  |
| 22 T27E9.7                    | AAEILHGLGFTK           | 30  | 1170  | 0.35 | 0.18 | 51 |
| 22 T27E9.7                    | AAEILHGLGFTK           | 72  | 2868  | 0.55 | 0.17 | 31 |
| 7 T27E9.7                     | AAEILHGLGFTK           | 25  | 1543  | 0.70 | 0.13 | 19 |
| 22 T27E9.7                    | TALQAVVDVDSVRK         | 84  | 5273  | 0.80 | 0.14 | 18 |
| 22 T27E9.7                    | AAEILHGLGFTK           | 59  | 2250  | 0.85 | 0.21 | 24 |
| 10 T27E9.7                    | TALQAVVDVDSVRK         | 57  | 3533  | 0.86 | 0.18 | 21 |
| 10 T27E9.7                    | AAEILHGLGFTK           | 61  | 1829  | 0.88 | 0.16 | 18 |
| 10 T27E9.7                    | STIIQAIYNK             | 53  | 1227  | 0.90 | 0.08 | 9  |
| 10 T27E9.7                    | STIIQAIYNK             | 55  | 1386  | 0.91 | 0.06 | 6  |
| 7 T27E9.7                     | AAEILHGLGFTK           | 11  | 1642  | 0.94 | 0.15 | 16 |
| 22 T27E9.7                    | STIIQAIYNK             | 36  | 839   | 0.95 | 0.02 | 2  |
| 1 T27E9.7                     | TALQAVVDVDSVRK         | 41  | 1419  | 1.00 | 0.17 | 17 |
| 22 T27E9.7                    | TALQAVVDVDSVRK         | 16  | 2786  | 1.01 | 0.10 | 10 |
| 10 T27E9.7                    | AAEILHGLGFTK           | 36  | 2276  | 1.02 | 0.07 | 7  |
| 10 T27E9.7                    | STIIQAIYNK             | 22  | 1222  | 1.04 | 0.11 | 10 |
| 10 T27E9.7                    | AAEILHGLGFTK           | 38  | 2452  | 1.06 | 0.10 | 10 |
| 1 T27E9.7                     | STIIQAIYNK             | 25  | 521   | 1.09 | 0.27 | 24 |
| 10 T27E9.7                    | TALQAVVDVDSVRK         | 72  | 3849  | 1.09 | 0.10 | 10 |
| 1 T27E9.7                     | TALQAVVDVDSVRK         | 47  | 1454  | 1.15 | 0.10 | 8  |
| 22 T27E9.7                    | TALQAVVDVDSVRK         | 43  | 3136  | 1.21 | 0.11 | 9  |
| 1 T27E9.7                     | STIIQAIYNK             | 19  | 679   | 1.34 | 0.02 | 1  |
| 10 T27E9.7                    | TALQAVVDVDSVRK         | 54  | 4854  | 1.47 | 0.05 | 3  |
| 10 T27E9.7                    | TALQAVVDVDSVRK         | 50  | 3996  | 1.53 | 0.15 | 10 |
| 10 T27E9.7                    | AAEILHGLGFTK           | 56  | 2558  | 1.69 | 0.21 | 13 |
| 22 T28D9.1                    | RVSSAHEEAPVADAEEDAPLTK | 105 | 31369 | 0.70 | 0.11 | 16 |
| 22 T28D9.1                    | RVSSAHEEAPVADAEEDAPLTK | 79  | 20910 | 0.71 | 0.06 | 9  |
| 1 T28D9.1                     | RVSSAHEEAPVADAEEDAPLTK | 53  | 20591 | 0.89 | 0.09 | 10 |
| 22 T28D9.1                    | RVSSAHEEAPVADAEEDAPLTK | 113 | 50102 | 1.00 | 0.11 | 11 |
| 22 T28D9.1                    | RVSSAHEEAPVADAEEDAPLTK | 97  | 35520 | 1.01 | 0.15 | 15 |
| 10 T28D9.1                    | RVSSAHEEAPVADAEEDAPLTK | 100 | 66126 | 1.24 | 0.09 | 7  |
| 10 T28D9.1                    | RVSSAHEEAPVADAEEDAPLTK | 103 | 74270 | 1.32 | 0.12 | 9  |
| 22 T28D9.1                    | RVSSAHEEAPVADAEEDAPLTK | 15  | 7509  | 1.42 | 0.19 | 13 |
| 10 T28D9.1                    | RVSSAHEEAPVADAEEDAPLTK | 106 | 29405 | 1.64 | 0.13 | 8  |
| 10 T28D9.1                    | RVSSAHEEAPVADAEEDAPLTK | 77  | 16026 | 1.65 | 0.11 | 7  |
| 1 T28H10.3                    | GASVTPENFLNVLK         | 12  | 677   | 0.73 | 0.37 | 51 |
| 10 T28H10.3                   | GASVTPENFLNVLK         | 17  | 1024  | 1.10 | 0.13 | 12 |
| 7 VF13D12L.1                  | VFVGDDDFK              | 27  | 2007  | 0.45 | 0.41 | 92 |
| 7 VF13D12L.1                  | VFVGDDDFK              | 22  | 1599  | 0.58 | 0.25 | 44 |
| 22 VF13D12L.1                 | VFVGDDDFK              | 22  | 4220  | 0.58 | 0.17 | 29 |
| 22 VF13D12L.1                 | VFVGDDDFK              | 24  | 4377  | 0.61 | 0.18 | 30 |
| 7 VF13D12L.1                  | VFVGDDDFK              | 34  | 1466  | 0.84 | 0.35 | 42 |
| 22 VF13D12L.1                 | VFVGDDDFK              | 11  | 2776  | 0.85 | 0.21 | 25 |
| 10 VF13D12L.1                 | VFVGDDDFK              | 16  | 2188  | 0.88 | 0.14 | 16 |
| 22 VF13D12L.1                 | VFVGDDDFK              | 14  | 2470  | 0.94 | 0.29 | 31 |
| 10 VF13D12L.1                 | VFVGDDDFK              | 13  | 1394  | 1.10 | 0.25 | 23 |
| 22 VF13D12L.1                 | RLIVESPNVK             | 35  | 3816  | 1.12 | 0.15 | 14 |
| 10 VF13D12L.1                 | RLIVESPNVK             | 24  | 3891  | 1.47 | 0.14 | 9  |
| 22 VF13D12L.1                 | RLIVESPNVK             | 52  | 2857  | 1.52 | 0.04 | 3  |
| 10 VF13D12L.1                 | RLIVESPNVK             | 29  | 4359  | 1.85 | 0.12 | 6  |
| 1 VF13D12L.1                  | RLIVESPNVK             | 43  | 1979  | 1.86 | 0.15 | 8  |
| 7 VF13D12L.1                  | RLIVESPNVK             | 57  | 2920  | 1.88 | 0.16 | 9  |
| 7 VF13D12L.1                  | RLIVESPNVK             | 63  | 3599  | 1.96 | 0.08 | 4  |
| 1 VF13D12L.1                  | RLIVESPNVK             | 30  | 1752  | 2.27 | 0.11 | 5  |
| 7 VF13D12L.3                  | NQITFVNDLAAK           | 15  | 1525  | 0.98 | 0.17 | 17 |
| 1 VF13D12L.3                  | NQITFVNDLAAK           | 12  | 965   | 1.03 | 0.11 | 10 |
| 7 VF13D12L.3                  | NQITFVNDLAAK           | 13  | 1310  | 1.45 | 0.21 | 15 |

|    |                                         |                            |    |       |      |      |     |
|----|-----------------------------------------|----------------------------|----|-------|------|------|-----|
| 10 | W02B12.10                               | MFFLFPDPHFK                | 19 | 1770  | 1.84 | 0.08 | 4   |
| 22 | W03C9.3                                 | VIILGDSGVGK                | 28 | 1952  | 0.93 | 0.09 | 10  |
| 22 | W03D2.4                                 | LANAGLLK                   | 14 | 736   | 0.49 | 0.26 | 52  |
| 22 | W03D2.4                                 | LANAGLLK                   | 16 | 2622  | 1.27 | 0.11 | 9   |
| 22 | W03D2.4                                 | LANAGLLK                   | 30 | 2766  | 1.61 | 0.09 | 6   |
| 1  | W03D2.4                                 | DLSTFSDSLNITATK            | 35 | 633   | 2.48 | 0.18 | 7   |
| 7  | W03F8.10                                | DLEHLQK                    | 15 | 935   | 0.50 | 0.16 | 32  |
| 22 | W03F8.10                                | SIAANLESRAVK               | 29 | 938   | 0.76 | 0.20 | 27  |
| 22 | W03F8.10                                | SIAANLESRAVK               | 39 | 740   | 0.96 | 0.23 | 24  |
| 22 | W03F8.10                                | DLEHLQK                    | 20 | 965   | 1.70 | 0.32 | 19  |
| 1  | W03F9.1                                 | SAVTTTFLEK                 | 10 | 703   | 0.71 | 0.07 | 10  |
| 22 | W03G9.4                                 | AQNFLTFFK                  | 33 | 2383  | 0.40 | 0.15 | 37  |
| 10 | W03G9.4                                 | AQNFLTFFK                  | 37 | 1808  | 0.49 | 0.20 | 41  |
| 10 | W03G9.4                                 | AQNFLTFFK                  | 29 | 2220  | 0.56 | 0.22 | 40  |
| 22 | W03G9.4                                 | AQNFLTFFK                  | 41 | 1886  | 0.60 | 0.14 | 23  |
| 1  | W03G9.4                                 | AQNFLTFFK                  | 21 | 955   | 0.71 | 0.22 | 30  |
| 10 | W03G9.4                                 | EFILHNTLVLK                | 43 | 2877  | 0.74 | 0.16 | 22  |
| 10 | W03G9.4                                 | EFILHNTLVLK                | 38 | 3216  | 0.79 | 0.09 | 11  |
| 22 | W03G9.4                                 | EFILHNTLVLK                | 14 | 1130  | 0.90 | 0.40 | 44  |
| 7  | W03G9.4                                 | AQNFLTFFK                  | 30 | 1403  | 0.92 | 0.23 | 25  |
| 10 | W03G9.4                                 | RYTEIELADK                 | 42 | 4698  | 1.21 | 0.08 | 7   |
| 22 | W03G9.4                                 | AQNFLTFFK                  | 60 | 2864  | 1.27 | 0.14 | 11  |
| 10 | W03G9.4                                 | GHINLARAK                  | 13 | 9728  | 1.28 | 0.25 | 20  |
| 22 | W03G9.4                                 | RYTEIELADK                 | 13 | 3621  | 1.29 | 0.16 | 13  |
| 22 | W03G9.4                                 | EFILHNTLVLK                | 45 | 3021  | 1.32 | 0.15 | 12  |
| 22 | W03G9.4                                 | EFILHNTLVLK                | 42 | 2471  | 1.35 | 0.19 | 14  |
| 22 | W03G9.4                                 | RYTEIELADK                 | 42 | 4053  | 1.48 | 0.11 | 7   |
| 10 | W03G9.4                                 | GHINLARAK                  | 11 | 23106 | 1.50 | 0.19 | 13  |
| 22 | W04E12.8                                | ENCVETAPDLSHDK             | 42 | 5389  | 0.72 | 0.09 | 12  |
| 10 | W04G3.5a;W04G3.5b                       | HVFILQSGSK                 | 18 | 1742  | 3.56 | 0.16 | 4   |
| 10 | W04G3.5a;W04G3.5b                       | PERADASSGMVLLTGNSHPELAK    | 74 | 4041  | 3.83 | 0.13 | 3   |
| 10 | W04G3.5a;W04G3.5b                       | HVFILQSGSK                 | 31 | 2484  | 4.47 | 0.12 | 3   |
| 7  | W05G11.6a;W05G11.6d;W05G11.6b;W05G11.6c | YLEHWIK                    | 23 | 1055  | 0.31 | 0.32 | 106 |
| 22 | W05G11.6a;W05G11.6d;W05G11.6b;W05G11.6c | YLEHWIK                    | 25 | 2838  | 0.37 | 0.08 | 20  |
| 10 | W05G11.6a;W05G11.6d;W05G11.6b;W05G11.6c | YLEHWIK                    | 20 | 2205  | 0.38 | 0.13 | 35  |
| 10 | W05G11.6a;W05G11.6d;W05G11.6b;W05G11.6c | YLEHWIK                    | 24 | 4279  | 0.38 | 0.14 | 37  |
| 10 | W05G11.6a;W05G11.6d;W05G11.6b;W05G11.6c | YLEHWIK                    | 28 | 3763  | 0.41 | 0.06 | 16  |
| 10 | W05G11.6a;W05G11.6d;W05G11.6b;W05G11.6c | LNHIPIFK                   | 15 | 4629  | 0.45 | 0.14 | 32  |
| 22 | W05G11.6a;W05G11.6d;W05G11.6b;W05G11.6c | YLEHWIK                    | 31 | 3113  | 0.46 | 0.11 | 24  |
| 22 | W05G11.6a;W05G11.6d;W05G11.6b;W05G11.6c | LVERGVLTPLK                | 12 | 2752  | 0.46 | 0.19 | 42  |
| 22 | W05G11.6a;W05G11.6d;W05G11.6b;W05G11.6c | YLEHWIK                    | 18 | 3652  | 0.47 | 0.14 | 30  |
| 22 | W05G11.6a;W05G11.6d;W05G11.6b;W05G11.6c | LNHIPIFK                   | 15 | 8888  | 0.48 | 0.10 | 20  |
| 22 | W05G11.6a;W05G11.6d;W05G11.6b;W05G11.6c | LVERGVLTPLK                | 19 | 2559  | 0.48 | 0.15 | 32  |
| 10 | W05G11.6a;W05G11.6d;W05G11.6b;W05G11.6c | LNHIPIFK                   | 20 | 4725  | 0.49 | 0.05 | 9   |
| 7  | W05G11.6a;W05G11.6d;W05G11.6b;W05G11.6c | YLEHWIK                    | 14 | 1010  | 0.49 | 0.16 | 32  |
| 22 | W05G11.6a;W05G11.6d;W05G11.6b;W05G11.6c | YLEHWIK                    | 31 | 3576  | 0.50 | 0.11 | 21  |
| 7  | W05G11.6a;W05G11.6d;W05G11.6b;W05G11.6c | YLEHWIK                    | 24 | 5341  | 0.59 | 0.06 | 10  |
| 22 | W05G11.6a;W05G11.6d;W05G11.6b;W05G11.6c | LNHIPIFK                   | 17 | 3977  | 0.60 | 0.13 | 22  |
| 10 | W05G11.6a;W05G11.6d;W05G11.6b;W05G11.6c | IFHVNWFRETK                | 10 | 7663  | 0.60 | 0.15 | 24  |
| 22 | W05G11.6a;W05G11.6d;W05G11.6b;W05G11.6c | LNHIPIFK                   | 13 | 3692  | 0.61 | 0.10 | 16  |
| 7  | W05G11.6a;W05G11.6d;W05G11.6b;W05G11.6c | YLEHWIK                    | 23 | 3516  | 0.61 | 0.14 | 22  |
| 10 | W05G11.6a;W05G11.6d;W05G11.6b;W05G11.6c | FGADGRLYAINPEAGFFGVAPGTSHK | 62 | 4422  | 0.62 | 0.08 | 14  |
| 22 | W05G11.6a;W05G11.6d;W05G11.6b;W05G11.6c | GDFASLSPK                  | 27 | 3656  | 0.63 | 0.07 | 12  |
| 7  | W05G11.6a;W05G11.6d;W05G11.6b;W05G11.6c | VRVVGDDIAWMK               | 11 | 751   | 0.64 | 0.21 | 34  |
| 22 | W05G11.6a;W05G11.6d;W05G11.6b;W05G11.6c | LVERGVLTPLK                | 11 | 1297  | 0.64 | 0.14 | 22  |
| 22 | W05G11.6a;W05G11.6d;W05G11.6b;W05G11.6c | GDFASLSPK                  | 14 | 2873  | 0.65 | 0.21 | 32  |
| 22 | W05G11.6a;W05G11.6d;W05G11.6b;W05G11.6c | VRVVGDDIAWMK               | 10 | 3379  | 0.66 | 0.16 | 24  |
| 7  | W05G11.6a;W05G11.6d;W05G11.6b;W05G11.6c | VQRFVAEK                   | 13 | 1336  | 0.66 | 0.09 | 14  |
| 22 | W05G11.6a;W05G11.6d;W05G11.6b;W05G11.6c | LVERGVLTPLK                | 14 | 1383  | 0.67 | 0.06 | 9   |
| 1  | W05G11.6a;W05G11.6d;W05G11.6b;W05G11.6c | SETTAAAEFTGK               | 20 | 1050  | 0.67 | 0.14 | 21  |
| 22 | W05G11.6a;W05G11.6d;W05G11.6b;W05G11.6c | YLEHWIK                    | 33 | 6546  | 0.69 | 0.10 | 14  |
| 22 | W05G11.6a;W05G11.6d;W05G11.6b;W05G11.6c | GYTDEQLK                   | 13 | 3652  | 0.69 | 0.10 | 14  |
| 10 | W05G11.6a;W05G11.6d;W05G11.6b;W05G11.6c | IFHVNWFRETK                | 11 | 8614  | 0.70 | 0.27 | 39  |
| 22 | W05G11.6a;W05G11.6d;W05G11.6b;W05G11.6c | LNHIPIFK                   | 14 | 1350  | 0.71 | 0.09 | 13  |
| 7  | W05G11.6a;W05G11.6d;W05G11.6b;W05G11.6c | LNHIPIFK                   | 12 | 2024  | 0.71 | 0.13 | 18  |
| 10 | W05G11.6a;W05G11.6d;W05G11.6b;W05G11.6c | YLEHWIK                    | 16 | 3413  | 0.71 | 0.10 | 14  |
| 22 | W05G11.6a;W05G11.6d;W05G11.6b;W05G11.6c | LVERGVLTPLK                | 14 | 1551  | 0.72 | 0.27 | 37  |
| 22 | W05G11.6a;W05G11.6d;W05G11.6b;W05G11.6c | GDFASLSPK                  | 24 | 4809  | 0.72 | 0.22 | 30  |
| 22 | W05G11.6a;W05G11.6d;W05G11.6b;W05G11.6c | LNHIPIFK                   | 16 | 3014  | 0.73 | 0.05 | 7   |
| 22 | W05G11.6a;W05G11.6d;W05G11.6b;W05G11.6c | LVERGVLTPLK                | 11 | 2414  | 0.73 | 0.24 | 32  |
| 10 | W05G11.6a;W05G11.6d;W05G11.6b;W05G11.6c | YLEHWIK                    | 17 | 4297  | 0.73 | 0.11 | 15  |
| 7  | W05G11.6a;W05G11.6d;W05G11.6b;W05G11.6c | FIAAAFPSACGK               | 16 | 1130  | 0.74 | 0.13 | 17  |
| 1  | W05G11.6a;W05G11.6d;W05G11.6b;W05G11.6c | YLEHWIK                    | 11 | 410   | 0.75 | 0.16 | 22  |
| 1  | W05G11.6a;W05G11.6d;W05G11.6b;W05G11.6c | SETTAAAEFTGK               | 49 | 2287  | 0.76 | 0.11 | 14  |
| 22 | W05G11.6a;W05G11.6d;W05G11.6b;W05G11.6c | LNHIPIFK                   | 18 | 5320  | 0.76 | 0.09 | 12  |
| 7  | W05G11.6a;W05G11.6d;W05G11.6b;W05G11.6c | FIAAAFPSACGK               | 24 | 1587  | 0.77 | 0.14 | 18  |
| 10 | W05G11.6a;W05G11.6d;W05G11.6b;W05G11.6c | GDFASLSPK                  | 17 | 1850  | 0.78 | 0.18 | 23  |
| 10 | W05G11.6a;W05G11.6d;W05G11.6b;W05G11.6c | YLEHWIK                    | 21 | 4534  | 0.78 | 0.16 | 20  |
| 10 | W05G11.6a;W05G11.6d;W05G11.6b;W05G11.6c | GDFASLSPK                  | 10 | 1915  | 0.79 | 0.33 | 42  |
| 22 | W05G11.6a;W05G11.6d;W05G11.6b;W05G11.6c | YLEHWIK                    | 28 | 4412  | 0.79 | 0.12 | 16  |
| 1  | W05G11.6a;W05G11.6d;W05G11.6b;W05G11.6c | LVERGVLTPLK                | 18 | 2236  | 0.79 | 0.11 | 14  |
| 10 | W05G11.6a;W05G11.6d;W05G11.6b;W05G11.6c | VRVVGDDIAWMK               | 11 | 2625  | 0.79 | 0.18 | 23  |
| 10 | W05G11.6a;W05G11.6d;W05G11.6b;W05G11.6c | VRVVGDDIAWMK               | 14 | 1812  | 0.81 | 0.16 | 20  |
| 22 | W05G11.6a;W05G11.6d;W05G11.6b;W05G11.6c | GYTDEQLK                   | 18 | 4180  | 0.81 | 0.24 | 30  |
| 1  | W05G11.6a;W05G11.6d;W05G11.6b;W05G11.6c | FIAAAFPSACGK               | 25 | 413   | 0.82 | 0.16 | 19  |
| 7  | W05G11.6a;W05G11.6d;W05G11.6b;W05G11.6c | YLEHWIK                    | 26 | 6526  | 0.82 | 0.20 | 25  |
| 10 | W05G11.6a;W05G11.6d;W05G11.6b;W05G11.6c | FGADGRLYAINPEAGFFGVAPGTSHK | 54 | 4544  | 0.83 | 0.12 | 14  |
| 22 | W05G11.6a;W05G11.6d;W05G11.6b;W05G11.6c | GYTDEQLK                   | 17 | 3683  | 0.84 | 0.39 | 46  |
| 22 | W05G11.6a;W05G11.6d;W05G11.6b;W05G11.6c | IFHVNWFRETK                | 10 | 7227  | 0.84 | 0.16 | 19  |
| 22 | W05G11.6a;W05G11.6d;W05G11.6b;W05G11.6c | YLEHWIK                    | 16 | 5091  | 0.85 | 0.06 | 7   |
| 22 | W05G11.6a;W05G11.6d;W05G11.6b;W05G11.6c | VRVVGDDIAWMK               | 25 | 2150  | 0.85 | 0.08 | 9   |
| 1  | W05G11.6a;W05G11.6d;W05G11.6b;W05G11.6c | LVERGVLTPLK                | 20 | 2957  | 0.85 | 0.15 | 18  |
| 22 | W05G11.6a;W05G11.6d;W05G11.6b;W05G11.6c | FIAAAFPSACGK               | 28 | 2253  | 0.88 | 0.10 | 11  |
| 7  | W05G11.6a;W05G11.6d;W05G11.6b;W05G11.6c | YLEHWIK                    | 21 | 6732  | 0.89 | 0.15 | 16  |
| 10 | W05G11.6a;W05G11.6d;W05G11.6b;W05G11.6c | GDFASLSPK                  | 10 | 3189  | 0.89 | 0.19 | 21  |
| 7  | W05G11.6a;W05G11.6d;W05G11.6b;W05G11.6c | YLEHWIK                    | 12 | 1811  | 0.90 | 0.06 | 6   |
| 10 | W05G11.6a;W05G11.6d;W05G11.6b;W05G11.6c | YLEHWIK                    | 25 | 5744  | 0.90 | 0.09 | 10  |
| 22 | W05G11.6a;W05G11.6d;W05G11.6b;W05G11.6c | GDFASLSPK                  | 36 | 2898  | 0.90 | 0.20 | 22  |
| 22 | W05G11.6a;W05G11.6d;W05G11.6b;W05G11.6c | VRVVGDDIAWMK               | 32 | 2543  | 0.91 | 0.11 | 12  |
| 22 | W05G11.6a;W05G11.6d;W05G11.6b;W05G11.6c | GDFASLSPK                  | 29 | 1980  | 0.91 | 0.09 | 10  |
| 22 | W05G11.6a;W05G11.6d;W05G11.6b;W05G11.6c | YLEHWIK                    | 13 | 3204  | 0.92 | 0.12 | 13  |

|    |                                         |                            |    |       |      |      |    |
|----|-----------------------------------------|----------------------------|----|-------|------|------|----|
| 7  | W05G11.6a;W05G11.6d;W05G11.6b;W05G11.6c | VRVVGDDIAWMK               | 34 | 2446  | 0.92 | 0.13 | 14 |
| 1  | W05G11.6a;W05G11.6d;W05G11.6b;W05G11.6c | VRVVGDDIAWMK               | 20 | 677   | 0.93 | 0.16 | 17 |
| 10 | W05G11.6a;W05G11.6d;W05G11.6b;W05G11.6c | LVERGVLTPLK                | 12 | 2235  | 0.93 | 0.07 | 7  |
| 7  | W05G11.6a;W05G11.6d;W05G11.6b;W05G11.6c | LVERGVLTPLK                | 15 | 2295  | 0.93 | 0.16 | 18 |
| 22 | W05G11.6a;W05G11.6d;W05G11.6b;W05G11.6c | VRVVGDDIAWMK               | 19 | 2085  | 0.94 | 0.16 | 17 |
| 1  | W05G11.6a;W05G11.6d;W05G11.6b;W05G11.6c | VRVVGDDIAWMK               | 26 | 1073  | 0.94 | 0.21 | 23 |
| 1  | W05G11.6a;W05G11.6d;W05G11.6b;W05G11.6c | LVERGVLTPLK                | 19 | 2473  | 0.95 | 0.08 | 8  |
| 1  | W05G11.6a;W05G11.6d;W05G11.6b;W05G11.6c | LVERGVLTPLK                | 14 | 2830  | 0.95 | 0.22 | 23 |
| 10 | W05G11.6a;W05G11.6d;W05G11.6b;W05G11.6c | VRVVGDDIAWMK               | 21 | 1989  | 0.96 | 0.18 | 18 |
| 1  | W05G11.6a;W05G11.6d;W05G11.6b;W05G11.6c | FIAAAFPSACGK               | 14 | 1021  | 0.96 | 0.12 | 13 |
| 7  | W05G11.6a;W05G11.6d;W05G11.6b;W05G11.6c | FIAAAFPSACGK               | 26 | 2286  | 0.97 | 0.13 | 13 |
| 10 | W05G11.6a;W05G11.6d;W05G11.6b;W05G11.6c | TNLAMLTPTVPGWK             | 16 | 1688  | 0.97 | 0.13 | 13 |
| 1  | W05G11.6a;W05G11.6d;W05G11.6b;W05G11.6c | GDFASLSPK                  | 20 | 2052  | 0.98 | 0.18 | 18 |
| 10 | W05G11.6a;W05G11.6d;W05G11.6b;W05G11.6c | YLEHWIK                    | 15 | 3629  | 0.98 | 0.13 | 14 |
| 22 | W05G11.6a;W05G11.6d;W05G11.6b;W05G11.6c | VRVVGDDIAWMK               | 43 | 3538  | 1.00 | 0.17 | 17 |
| 1  | W05G11.6a;W05G11.6d;W05G11.6b;W05G11.6c | GDFASLSPK                  | 18 | 2344  | 1.02 | 0.22 | 21 |
| 22 | W05G11.6a;W05G11.6d;W05G11.6b;W05G11.6c | LNHIPIFK                   | 13 | 1793  | 1.03 | 0.12 | 12 |
| 22 | W05G11.6a;W05G11.6d;W05G11.6b;W05G11.6c | LNHIPIFK                   | 19 | 5892  | 1.03 | 0.08 | 7  |
| 10 | W05G11.6a;W05G11.6d;W05G11.6b;W05G11.6c | YLEHWIK                    | 12 | 4803  | 1.03 | 0.06 | 6  |
| 22 | W05G11.6a;W05G11.6d;W05G11.6b;W05G11.6c | VRVVGDDIAWMK               | 30 | 3667  | 1.04 | 0.10 | 10 |
| 1  | W05G11.6a;W05G11.6d;W05G11.6b;W05G11.6c | YLEHWIK                    | 15 | 543   | 1.04 | 0.08 | 8  |
| 22 | W05G11.6a;W05G11.6d;W05G11.6b;W05G11.6c | LVERGVLTPLK                | 16 | 2958  | 1.05 | 0.05 | 5  |
| 1  | W05G11.6a;W05G11.6d;W05G11.6b;W05G11.6c | FIAAAFPSACGK               | 16 | 1073  | 1.06 | 0.07 | 7  |
| 22 | W05G11.6a;W05G11.6d;W05G11.6b;W05G11.6c | VQRFVAEK                   | 13 | 4218  | 1.06 | 0.13 | 12 |
| 22 | W05G11.6a;W05G11.6d;W05G11.6b;W05G11.6c | LNHIPIFK                   | 12 | 3646  | 1.07 | 0.07 | 7  |
| 7  | W05G11.6a;W05G11.6d;W05G11.6b;W05G11.6c | YLEHWIK                    | 14 | 1436  | 1.08 | 0.12 | 11 |
| 7  | W05G11.6a;W05G11.6d;W05G11.6b;W05G11.6c | GDFASLSPK                  | 19 | 2537  | 1.09 | 0.21 | 19 |
| 1  | W05G11.6a;W05G11.6d;W05G11.6b;W05G11.6c | FIAAAFPSACGK               | 30 | 706   | 1.11 | 0.13 | 12 |
| 7  | W05G11.6a;W05G11.6d;W05G11.6b;W05G11.6c | LVERGVLTPLK                | 13 | 2611  | 1.11 | 0.10 | 9  |
| 1  | W05G11.6a;W05G11.6d;W05G11.6b;W05G11.6c | GDFASLSPK                  | 28 | 2247  | 1.12 | 0.46 | 41 |
| 7  | W05G11.6a;W05G11.6d;W05G11.6b;W05G11.6c | LNHIPIFK                   | 11 | 4663  | 1.12 | 0.17 | 15 |
| 7  | W05G11.6a;W05G11.6d;W05G11.6b;W05G11.6c | LNHIPIFK                   | 17 | 1669  | 1.15 | 0.22 | 20 |
| 10 | W05G11.6a;W05G11.6d;W05G11.6b;W05G11.6c | AAHPNSRFTAPAK              | 16 | 26142 | 1.16 | 0.21 | 18 |
| 22 | W05G11.6a;W05G11.6d;W05G11.6b;W05G11.6c | VRVVGDDIAWMK               | 16 | 2129  | 1.17 | 0.08 | 7  |
| 7  | W05G11.6a;W05G11.6d;W05G11.6b;W05G11.6c | YLEHWIK                    | 15 | 1586  | 1.17 | 0.06 | 5  |
| 1  | W05G11.6a;W05G11.6d;W05G11.6b;W05G11.6c | LNHIPIFK                   | 20 | 1591  | 1.18 | 0.12 | 11 |
| 22 | W05G11.6a;W05G11.6d;W05G11.6b;W05G11.6c | YLEHWIK                    | 27 | 4978  | 1.20 | 0.09 | 7  |
| 1  | W05G11.6a;W05G11.6d;W05G11.6b;W05G11.6c | YLEHWIK                    | 26 | 2723  | 1.20 | 0.09 | 7  |
| 10 | W05G11.6a;W05G11.6d;W05G11.6b;W05G11.6c | VRVVGDDIAWMK               | 37 | 2414  | 1.21 | 0.11 | 9  |
| 10 | W05G11.6a;W05G11.6d;W05G11.6b;W05G11.6c | LNHIPIFK                   | 11 | 3599  | 1.22 | 0.09 | 7  |
| 22 | W05G11.6a;W05G11.6d;W05G11.6b;W05G11.6c | YLEHWIK                    | 15 | 3651  | 1.23 | 0.10 | 8  |
| 7  | W05G11.6a;W05G11.6d;W05G11.6b;W05G11.6c | LVERGVLTPLK                | 27 | 1409  | 1.23 | 0.21 | 17 |
| 1  | W05G11.6a;W05G11.6d;W05G11.6b;W05G11.6c | VQRFVAEK                   | 10 | 1958  | 1.23 | 0.17 | 14 |
| 1  | W05G11.6a;W05G11.6d;W05G11.6b;W05G11.6c | YLEHWIK                    | 20 | 2131  | 1.25 | 0.08 | 6  |
| 7  | W05G11.6a;W05G11.6d;W05G11.6b;W05G11.6c | VRVVGDDIAWMK               | 19 | 2489  | 1.26 | 0.14 | 11 |
| 22 | W05G11.6a;W05G11.6d;W05G11.6b;W05G11.6c | GDFASLSPK                  | 45 | 2791  | 1.29 | 0.15 | 12 |
| 7  | W05G11.6a;W05G11.6d;W05G11.6b;W05G11.6c | GDFASLSPK                  | 31 | 2378  | 1.29 | 0.16 | 12 |
| 1  | W05G11.6a;W05G11.6d;W05G11.6b;W05G11.6c | FIAAAFPSACGK               | 17 | 1098  | 1.29 | 0.14 | 11 |
| 22 | W05G11.6a;W05G11.6d;W05G11.6b;W05G11.6c | FIAAAFPSACGK               | 39 | 2129  | 1.30 | 0.15 | 11 |
| 1  | W05G11.6a;W05G11.6d;W05G11.6b;W05G11.6c | YLEHWIK                    | 16 | 2123  | 1.30 | 0.12 | 9  |
| 22 | W05G11.6a;W05G11.6d;W05G11.6b;W05G11.6c | FIAAAFPSACGK               | 13 | 1165  | 1.30 | 0.08 | 6  |
| 7  | W05G11.6a;W05G11.6d;W05G11.6b;W05G11.6c | LNHIPIFK                   | 26 | 3058  | 1.31 | 0.07 | 6  |
| 10 | W05G11.6a;W05G11.6d;W05G11.6b;W05G11.6c | YLEHWIK                    | 11 | 4163  | 1.32 | 0.06 | 5  |
| 7  | W05G11.6a;W05G11.6d;W05G11.6b;W05G11.6c | GDFASLSPK                  | 33 | 2011  | 1.33 | 0.11 | 8  |
| 1  | W05G11.6a;W05G11.6d;W05G11.6b;W05G11.6c | VQRFVAEK                   | 12 | 2011  | 1.34 | 0.15 | 11 |
| 22 | W05G11.6a;W05G11.6d;W05G11.6b;W05G11.6c | FGADGRLYAINPEAGFFGVAPGTSHK | 60 | 6200  | 1.38 | 0.11 | 8  |
| 1  | W05G11.6a;W05G11.6d;W05G11.6b;W05G11.6c | YLEHWIK                    | 23 | 1212  | 1.38 | 0.20 | 14 |
| 1  | W05G11.6a;W05G11.6d;W05G11.6b;W05G11.6c | LNHIPIFK                   | 19 | 7699  | 1.40 | 0.10 | 7  |
| 1  | W05G11.6a;W05G11.6d;W05G11.6b;W05G11.6c | FIAAAFPSACGK               | 29 | 902   | 1.40 | 0.11 | 8  |
| 10 | W05G11.6a;W05G11.6d;W05G11.6b;W05G11.6c | GDFASLSPK                  | 10 | 2116  | 1.42 | 0.19 | 13 |
| 10 | W05G11.6a;W05G11.6d;W05G11.6b;W05G11.6c | GDFASLSPK                  | 25 | 13245 | 1.43 | 0.10 | 7  |
| 22 | W05G11.6a;W05G11.6d;W05G11.6b;W05G11.6c | GDFASLSPK                  | 39 | 14803 | 1.43 | 0.12 | 8  |
| 10 | W05G11.6a;W05G11.6d;W05G11.6b;W05G11.6c | YLEHWIK                    | 22 | 6146  | 1.43 | 0.10 | 7  |
| 10 | W05G11.6a;W05G11.6d;W05G11.6b;W05G11.6c | LNHIPIFK                   | 25 | 5541  | 1.44 | 0.09 | 7  |
| 1  | W05G11.6a;W05G11.6d;W05G11.6b;W05G11.6c | LNHIPIFK                   | 34 | 8201  | 1.44 | 0.08 | 5  |
| 1  | W05G11.6a;W05G11.6d;W05G11.6b;W05G11.6c | YLEHWIK                    | 27 | 2116  | 1.45 | 0.11 | 8  |
| 22 | W05G11.6a;W05G11.6d;W05G11.6b;W05G11.6c | VRVVGDDIAWMK               | 14 | 2376  | 1.46 | 0.11 | 7  |
| 22 | W05G11.6a;W05G11.6d;W05G11.6b;W05G11.6c | GDFASLSPK                  | 25 | 13263 | 1.46 | 0.05 | 4  |
| 10 | W05G11.6a;W05G11.6d;W05G11.6b;W05G11.6c | VRVVGDDIAWMK               | 13 | 2190  | 1.50 | 0.08 | 5  |
| 7  | W05G11.6a;W05G11.6d;W05G11.6b;W05G11.6c | LNHIPIFK                   | 21 | 4053  | 1.50 | 0.11 | 7  |
| 10 | W05G11.6a;W05G11.6d;W05G11.6b;W05G11.6c | LVERGVLTPLK                | 20 | 8777  | 1.51 | 0.13 | 8  |
| 10 | W05G11.6a;W05G11.6d;W05G11.6b;W05G11.6c | VRVVGDDIAWMK               | 12 | 2701  | 1.52 | 0.18 | 12 |
| 10 | W05G11.6a;W05G11.6d;W05G11.6b;W05G11.6c | AAHPNSRFTAPAK              | 12 | 24014 | 1.52 | 0.07 | 5  |
| 7  | W05G11.6a;W05G11.6d;W05G11.6b;W05G11.6c | YLEHWIK                    | 12 | 3901  | 1.55 | 0.08 | 5  |
| 7  | W05G11.6a;W05G11.6d;W05G11.6b;W05G11.6c | VRVVGDDIAWMK               | 21 | 2279  | 1.56 | 0.05 | 3  |
| 10 | W05G11.6a;W05G11.6d;W05G11.6b;W05G11.6c | YLEHWIK                    | 14 | 4078  | 1.58 | 0.08 | 5  |
| 22 | W05G11.6a;W05G11.6d;W05G11.6b;W05G11.6c | LNHIPIFK                   | 25 | 6162  | 1.59 | 0.06 | 4  |
| 22 | W05G11.6a;W05G11.6d;W05G11.6b;W05G11.6c | VQRFVAEK                   | 11 | 7898  | 1.59 | 0.14 | 9  |
| 1  | W05G11.6a;W05G11.6d;W05G11.6b;W05G11.6c | AAHPNSRFTAPAK              | 11 | 19421 | 1.60 | 0.21 | 13 |
| 7  | W05G11.6a;W05G11.6d;W05G11.6b;W05G11.6c | GDFASLSPK                  | 16 | 2532  | 1.61 | 0.13 | 8  |
| 22 | W05G11.6a;W05G11.6d;W05G11.6b;W05G11.6c | FGADGRLYAINPEAGFFGVAPGTSHK | 16 | 1511  | 1.67 | 0.13 | 8  |
| 10 | W05G11.6a;W05G11.6d;W05G11.6b;W05G11.6c | YLEHWIK                    | 14 | 2421  | 1.70 | 0.07 | 4  |
| 22 | W05G11.6a;W05G11.6d;W05G11.6b;W05G11.6c | VRVVGDDIAWMK               | 15 | 2265  | 1.71 | 0.15 | 9  |
| 22 | W05G11.6a;W05G11.6d;W05G11.6b;W05G11.6c | LVERGVLTPLK                | 14 | 3805  | 1.71 | 0.20 | 12 |
| 1  | W05G11.6a;W05G11.6d;W05G11.6b;W05G11.6c | VQRFVAEK                   | 20 | 3225  | 1.71 | 0.02 | 1  |
| 10 | W05G11.6a;W05G11.6d;W05G11.6b;W05G11.6c | LNHIPIFK                   | 14 | 4689  | 1.76 | 0.11 | 6  |
| 1  | W05G11.6a;W05G11.6d;W05G11.6b;W05G11.6c | FIAAAFPSACGK               | 21 | 1222  | 1.77 | 0.20 | 11 |
| 1  | W05G11.6a;W05G11.6d;W05G11.6b;W05G11.6c | VQRFVAEK                   | 14 | 3335  | 1.79 | 0.15 | 8  |
| 22 | W05G11.6a;W05G11.6d;W05G11.6b;W05G11.6c | FGADGRLYAINPEAGFFGVAPGTSHK | 64 | 3933  | 1.79 | 0.11 | 6  |
| 22 | W05G11.6a;W05G11.6d;W05G11.6b;W05G11.6c | VRVVGDDIAWMK               | 12 | 1380  | 1.82 | 0.29 | 16 |
| 1  | W05G11.6a;W05G11.6d;W05G11.6b;W05G11.6c | AAHPNSRFTAPAK              | 14 | 18191 | 1.86 | 0.09 | 5  |
| 1  | W05G11.6a;W05G11.6d;W05G11.6b;W05G11.6c | GDFASLSPK                  | 28 | 2099  | 1.88 | 0.19 | 10 |
| 22 | W05G11.6a;W05G11.6d;W05G11.6b;W05G11.6c | LNHIPIFK                   | 14 | 4032  | 1.91 | 0.04 | 2  |
| 10 | W05G11.6a;W05G11.6d;W05G11.6b;W05G11.6c | AAHPNSRFTAPAK              | 12 | 21683 | 1.94 | 0.49 | 25 |
| 10 | W05G11.6a;W05G11.6d;W05G11.6b;W05G11.6c | LNHIPIFK                   | 12 | 4133  | 1.95 | 0.08 | 4  |
| 1  | W05G11.6a;W05G11.6d;W05G11.6b;W05G11.6c | GDFASLSPK                  | 32 | 2887  | 1.96 | 0.25 | 13 |
| 10 | W05G11.6a;W05G11.6d;W05G11.6b;W05G11.6c | YLEHWIK                    | 19 | 3675  | 2.07 | 0.13 | 7  |
| 1  | W05G11.6a;W05G11.6d;W05G11.6b;W05G11.6c | VQRFVAEK                   | 18 | 1939  | 2.07 | 0.11 | 5  |
| 1  | W05G11.6a;W05G11.6d;W05G11.6b;W05G11.6c | FIAAAFPSACGK               | 39 | 1347  | 2.13 | 0.23 | 11 |
| 1  | W05G11.6a;W05G11.6d;W05G11.6b;W05G11.6c | YLEHWIK                    | 25 | 1508  | 2.13 | 0.08 | 4  |
| 10 | W05G11.6a;W05G11.6d;W05G11.6b;W05G11.6c | LNHIPIFK                   | 12 | 2358  | 2.16 | 0.18 | 8  |

|    |                                                       |                       |    |      |      |      |     |
|----|-------------------------------------------------------|-----------------------|----|------|------|------|-----|
| 1  | W05G11.6a;W05G11.6d;W05G11.6b;W05G11.6c               | LNHIPIFK              | 23 | 3279 | 2.20 | 0.17 | 8   |
| 1  | W05G11.6a;W05G11.6d;W05G11.6b;W05G11.6c               | VQRFVAEK              | 15 | 2081 | 2.20 | 0.07 | 3   |
| 7  | W05G11.6a;W05G11.6d;W05G11.6b;W05G11.6c               | LVERGVLTPLK           | 17 | 1370 | 2.26 | 0.24 | 11  |
| 1  | W05G11.6a;W05G11.6d;W05G11.6b;W05G11.6c               | FIAAAFPSACGK          | 23 | 974  | 2.27 | 0.13 | 6   |
| 10 | W05G11.6a;W05G11.6d;W05G11.6b;W05G11.6c               | YLEHWIK               | 19 | 2866 | 2.35 | 0.11 | 5   |
| 10 | W05G11.6a;W05G11.6d;W05G11.6b;W05G11.6c               | VQRFVAEK              | 20 | 7781 | 3.32 | 0.09 | 3   |
| 10 | W05G11.6a;W05G11.6d;W05G11.6b;W05G11.6c               | VQRFVAEK              | 17 | 5703 | 3.71 | 0.08 | 2   |
| 22 | W06E11.4                                              | GHGRLEILSLK           | 19 | 7090 | 1.32 | 0.17 | 13  |
| 22 | W06E11.4                                              | GHGRLEILSLK           | 12 | 6942 | 1.74 | 0.16 | 9   |
| 10 | W06H3.3                                               | GISSSLGVLLK           | 65 | 973  | 0.23 | 0.29 | 125 |
| 10 | W06H3.3                                               | YILVTGGVISGVGK        | 38 | 1547 | 0.43 | 0.13 | 29  |
| 1  | W06H3.3                                               | ALSHAAIHAK            | 24 | 2014 | 0.44 | 0.16 | 37  |
| 1  | W06H3.3                                               | AADGVIVPGGFDK         | 12 | 1839 | 0.46 | 0.19 | 43  |
| 1  | W06H3.3                                               | AADGVIVPGGFDK         | 15 | 2055 | 0.46 | 0.06 | 14  |
| 10 | W06H3.3                                               | YILVTGGVISGVGK        | 29 | 1176 | 0.59 | 0.11 | 19  |
| 22 | W06H3.3                                               | LHENQQIVIDMPEHNVEEK   | 31 | 4869 | 0.75 | 0.11 | 14  |
| 22 | W06H3.3                                               | YILVTGGVISGVGK        | 50 | 2112 | 0.93 | 0.06 | 7   |
| 10 | W06H3.3                                               | IADAYASVNK            | 85 | 5699 | 0.93 | 0.07 | 8   |
| 22 | W06H3.3                                               | YILVTGGVISGVGK        | 64 | 2347 | 0.96 | 0.11 | 12  |
| 1  | W06H3.3                                               | ALSHAAIHAK            | 22 | 3335 | 0.99 | 0.15 | 15  |
| 10 | W06H3.3                                               | LHENQQIVIDMPEHNVEEK   | 44 | 5083 | 1.03 | 0.10 | 10  |
| 22 | W06H3.3                                               | YILVTGGVISGVGK        | 53 | 2164 | 1.05 | 0.11 | 10  |
| 10 | W06H3.3                                               | LHENQQIVIDMPEHNVEEK   | 29 | 3952 | 1.10 | 0.12 | 11  |
| 10 | W06H3.3                                               | IADAYASVNK            | 80 | 6243 | 1.36 | 0.14 | 11  |
| 10 | W06H3.3                                               | ALSHAAIHAK            | 19 | 2795 | 1.57 | 0.19 | 12  |
| 22 | W06H3.3                                               | YILVTGGVISGVGK        | 23 | 1681 | 1.63 | 0.18 | 11  |
| 22 | W06H3.3                                               | GISSSLGVLLK           | 84 | 675  | 1.78 | 0.14 | 8   |
| 22 | W06H3.3                                               | GISSSLGVLLK           | 58 | 485  | 1.80 | 0.14 | 8   |
| 22 | W06H3.3                                               | IADAYASVNK            | 61 | 4259 | 1.91 | 0.08 | 4   |
| 22 | W06H3.3                                               | IADAYASVNK            | 62 | 4851 | 2.18 | 0.29 | 13  |
| 10 | W06H3.3                                               | ALSHAAIHAK            | 14 | 3228 | 2.34 | 0.03 | 1   |
| 1  | W06H8.1a;W06H8.1c;W06H8.1d                            | LEGHEIPSELPK          | 27 | 3464 | 0.25 | 0.09 | 37  |
| 1  | W06H8.1a;W06H8.1c;W06H8.1d                            | LEGHEIPSELPK          | 27 | 3027 | 0.28 | 0.09 | 32  |
| 1  | W06H8.1a;W06H8.1c;W06H8.1d                            | LEGHEIPSELPK          | 17 | 2659 | 0.52 | 0.17 | 32  |
| 1  | W06H8.1a;W06H8.1c;W06H8.1d                            | EVLETVSEGLRK          | 43 | 1347 | 0.87 | 0.20 | 23  |
| 1  | W06H8.1a;W06H8.1c;W06H8.1d                            | HLIPPSK               | 13 | 2788 | 1.22 | 0.30 | 25  |
| 1  | W06H8.1a;W06H8.1c;W06H8.1d                            | LLPLEEFHK             | 22 | 2192 | 1.67 | 0.12 | 7   |
| 10 | W06H8.1b;W06H8.1e;W06H8.1a;W06H8.1c                   | VHAYIAELRK            | 10 | 2318 | 0.54 | 0.26 | 48  |
| 10 | W06H8.1b;W06H8.1e;W06H8.1a;W06H8.1c                   | IYEQLQREHNISPGDFPDVNK | 40 | 6834 | 0.76 | 0.17 | 22  |
| 10 | W06H8.1b;W06H8.1e;W06H8.1a;W06H8.1c                   | LEGHEIPSELPK          | 24 | 9345 | 0.94 | 0.08 | 9   |
| 10 | W06H8.1b;W06H8.1e;W06H8.1a;W06H8.1c                   | LLPLEEFHK             | 13 | 3138 | 1.15 | 0.14 | 12  |
| 10 | W06H8.1b;W06H8.1e;W06H8.1a;W06H8.1c                   | EVLETVSEGLRK          | 31 | 3944 | 1.67 | 0.11 | 6   |
| 10 | W06H8.1b;W06H8.1e;W06H8.1a;W06H8.1c                   | EVLETVSEGLRK          | 28 | 3034 | 1.73 | 0.10 | 6   |
| 10 | W06H8.1b;W06H8.1e;W06H8.1a;W06H8.1c                   | LLPLEEFHK             | 15 | 5587 | 1.96 | 0.12 | 6   |
| 10 | W06H8.1b;W06H8.1e;W06H8.1a;W06H8.1c                   | HLIPPSK               | 15 | 7068 | 2.07 | 0.12 | 6   |
| 10 | W06H8.1b;W06H8.1e;W06H8.1a;W06H8.1c                   | HLIPPSK               | 18 | 4237 | 3.65 | 0.13 | 4   |
| 22 | W06H8.1b;W06H8.1e;W06H8.1c;W06H8.1d                   | IYEQLQREHNISPGDFPDVNK | 53 | 8423 | 0.49 | 0.10 | 20  |
| 22 | W06H8.1b;W06H8.1e;W06H8.1c;W06H8.1d                   | DLIQNLDK              | 12 | 2989 | 0.61 | 0.14 | 23  |
| 22 | W06H8.1b;W06H8.1e;W06H8.1c;W06H8.1d                   | LEGHEIPSELPK          | 26 | 8271 | 0.62 | 0.06 | 10  |
| 22 | W06H8.1b;W06H8.1e;W06H8.1c;W06H8.1d                   | IYEQLQREHNISPGDFPDVNK | 29 | 8210 | 0.65 | 0.13 | 20  |
| 22 | W06H8.1b;W06H8.1e;W06H8.1c;W06H8.1d                   | EVLETVSEGLRK          | 38 | 3220 | 0.68 | 0.15 | 23  |
| 22 | W06H8.1b;W06H8.1e;W06H8.1c;W06H8.1d                   | LLPLEEFHK             | 18 | 3329 | 0.71 | 0.05 | 7   |
| 22 | W06H8.1b;W06H8.1e;W06H8.1c;W06H8.1d                   | DLIQNLDK              | 21 | 2789 | 0.72 | 0.12 | 17  |
| 22 | W06H8.1b;W06H8.1e;W06H8.1c;W06H8.1d                   | EVLETVSEGLRK          | 30 | 3041 | 0.72 | 0.21 | 29  |
| 22 | W06H8.1b;W06H8.1e;W06H8.1c;W06H8.1d                   | LLPLEEFHK             | 12 | 2537 | 0.96 | 0.10 | 11  |
| 22 | W06H8.1b;W06H8.1e;W06H8.1c;W06H8.1d                   | EVLETVSEGLRK          | 33 | 4008 | 0.98 | 0.10 | 10  |
| 22 | W06H8.1b;W06H8.1e;W06H8.1c;W06H8.1d                   | EVLETVSEGLRK          | 42 | 3878 | 1.20 | 0.11 | 9   |
| 22 | W06H8.1b;W06H8.1e;W06H8.1c;W06H8.1d                   | LLPLEEFHK             | 11 | 3911 | 1.32 | 0.08 | 6   |
| 22 | W06H8.1b;W06H8.1e;W06H8.1c;W06H8.1d                   | HLIPPSK               | 16 | 3919 | 1.40 | 0.16 | 12  |
| 22 | W06H8.1b;W06H8.1e;W06H8.1c;W06H8.1d                   | HLIPPSK               | 16 | 4231 | 1.46 | 0.07 | 5   |
| 7  | W06H8.1b;W06H8.1e;W06H8.1c;W06H8.1f                   | EVLETVSEGLRK          | 29 | 1053 | 0.78 | 0.13 | 17  |
| 10 | W06H8.8e;W06H8.8g;W06H8.8b                            | ETSEVEPAEIVEQK        | 26 | 926  | 0.16 | 0.08 | 49  |
| 10 | W06H8.8e;W06H8.8g;W06H8.8b                            | ETSEVEPAEIVEQK        | 26 | 3449 | 0.25 | 0.05 | 18  |
| 10 | W06H8.8e;W06H8.8g;W06H8.8b                            | ETSEVEPAEIVEQK        | 46 | 2912 | 0.28 | 0.16 | 58  |
| 10 | W06H8.8e;W06H8.8g;W06H8.8b                            | ETSEVEPAEIVEQK        | 32 | 2891 | 0.29 | 0.20 | 68  |
| 10 | W06H8.8e;W06H8.8g;W06H8.8b                            | ETSEVEPAEIVEQK        | 14 | 1280 | 0.30 | 0.13 | 43  |
| 10 | W06H8.8e;W06H8.8g;W06H8.8b                            | DVPVPETSAPTVEPTVEK    | 38 | 1844 | 0.36 | 0.15 | 42  |
| 10 | W06H8.8e;W06H8.8g;W06H8.8b                            | DVPVPETSAPTVEPTVEK    | 23 | 1987 | 0.38 | 0.17 | 44  |
| 10 | W06H8.8e;W06H8.8g;W06H8.8b                            | DVPVPETSAPTVEPTVEK    | 37 | 2676 | 0.46 | 0.25 | 53  |
| 22 | W06H8.8e;W06H8.8g;W06H8.8d;W06H8.8b                   | DVPVPETSAPTVEPTVEK    | 26 | 1927 | 0.41 | 0.28 | 67  |
| 22 | W06H8.8e;W06H8.8g;W06H8.8d;W06H8.8b                   | DVPVPETSAPTVEPTVEK    | 26 | 1976 | 0.54 | 0.11 | 20  |
| 22 | W06H8.8e;W06H8.8g;W06H8.8d;W06H8.8b                   | ILDGSPLK              | 18 | 3305 | 0.56 | 0.50 | 89  |
| 22 | W06H8.8e;W06H8.8g;W06H8.8d;W06H8.8b                   | ETSEVQPAEIVEQK        | 46 | 3620 | 0.57 | 0.09 | 15  |
| 22 | W06H8.8e;W06H8.8g;W06H8.8d;W06H8.8b                   | ETSEVQPAEIVEHK        | 28 | 856  | 0.68 | 0.15 | 22  |
| 22 | W06H8.8e;W06H8.8g;W06H8.8d;W06H8.8b                   | ETSEVEPAEIVEQK        | 24 | 1564 | 0.68 | 0.12 | 17  |
| 22 | W06H8.8e;W06H8.8g;W06H8.8d;W06H8.8b                   | ETSEVQPAEIVEQK        | 39 | 2635 | 0.76 | 0.13 | 17  |
| 22 | W06H8.8e;W06H8.8g;W06H8.8d;W06H8.8b                   | ETSEVQPAEIVEHK        | 38 | 895  | 0.77 | 0.21 | 27  |
| 22 | W06H8.8e;W06H8.8g;W06H8.8d;W06H8.8b                   | ETSEVQQAIVEQK         | 52 | 1669 | 0.81 | 0.18 | 22  |
| 22 | W06H8.8e;W06H8.8g;W06H8.8d;W06H8.8b                   | ETSEVEPAEIVEQK        | 43 | 1991 | 0.82 | 0.13 | 17  |
| 22 | W06H8.8e;W06H8.8g;W06H8.8d;W06H8.8b                   | ETSEVQQAIVEQK         | 58 | 1206 | 0.93 | 0.24 | 26  |
| 22 | W06H8.8e;W06H8.8g;W06H8.8d;W06H8.8b                   | GSTAAPAQEPTVEK        | 17 | 2928 | 1.08 | 0.03 | 3   |
| 22 | W06H8.8e;W06H8.8g;W06H8.8d;W06H8.8b                   | GSTAAPAQEPTVEK        | 44 | 2453 | 1.16 | 0.11 | 10  |
| 22 | W06H8.8e;W06H8.8g;W06H8.8d;W06H8.8b                   | ETSEVEPAEIVEQK        | 30 | 2283 | 2.47 | 0.13 | 5   |
| 22 | W06H8.8e;W06H8.8g;W06H8.8d;W06H8.8b                   | ETSEVEPAEIVEQK        | 34 | 1912 | 2.69 | 0.13 | 5   |
| 7  | W06H8.8f;W06H8.8e;W06H8.8g;W06H8.8b;T11B7.2b;T11B7.2c | ETSEVQPAEIVEQK        | 14 | 1196 | 0.42 | 0.09 | 22  |
| 7  | W06H8.8f;W06H8.8e;W06H8.8g;W06H8.8b;T11B7.2b;T11B7.2c | ETSEVQQAIVEQK         | 45 | 1211 | 0.47 | 0.15 | 32  |
| 7  | W06H8.8f;W06H8.8e;W06H8.8g;W06H8.8b;T11B7.2b;T11B7.2c | ETSEVEPAEIVEQK        | 22 | 1846 | 0.56 | 0.20 | 36  |
| 7  | W06H8.8f;W06H8.8e;W06H8.8g;W06H8.8b;T11B7.2b;T11B7.2c | DVPVPETSAPTVEPTVEK    | 36 | 2233 | 0.60 | 0.19 | 31  |
| 7  | W06H8.8f;W06H8.8e;W06H8.8g;W06H8.8b;T11B7.2b;T11B7.2c | ETSEVEPAEIVEQK        | 34 | 2131 | 0.63 | 0.10 | 16  |
| 7  | W06H8.8f;W06H8.8e;W06H8.8g;W06H8.8b;T11B7.2b;T11B7.2c | DVPVPETSAPTVEPTVEK    | 15 | 692  | 0.72 | 0.13 | 18  |
| 7  | W06H8.8f;W06H8.8e;W06H8.8g;W06H8.8b;T11B7.2b;T11B7.2c | ILDGSPLK              | 16 | 1360 | 1.11 | 0.22 | 20  |
| 7  | W06H8.8f;W06H8.8e;W06H8.8g;W06H8.8b;T11B7.2b;T11B7.2c | MTIQSLK               | 11 | 1367 | 1.23 | 0.28 | 23  |
| 1  | W06H8.8f;W06H8.8e;W06H8.8g;W06H8.8d;W06H8.8c          | ETSEVQPAEIVEQK        | 15 | 1129 | 0.64 | 0.13 | 20  |
| 1  | W06H8.8f;W06H8.8e;W06H8.8g;W06H8.8d;W06H8.8c          | ETSEVEPAEIVEQK        | 21 | 1245 | 0.82 | 0.13 | 16  |
| 1  | W06H8.8f;W06H8.8e;W06H8.8g;W06H8.8d;W06H8.8c          | ETSEVEPAEIVEQK        | 25 | 1160 | 1.24 | 0.19 | 15  |
| 7  | W07B8.5                                               | NNYATPYLQDK           | 22 | 1965 | 0.42 | 0.13 | 31  |
| 1  | W07B8.5                                               | NNYATPYLQDK           | 21 | 2253 | 0.51 | 0.09 | 17  |
| 7  | W07B8.5                                               | LWTAGHQVIPK           | 31 | 1906 | 0.95 | 0.16 | 17  |
| 22 | W07B8.5                                               | NNYATPYLQDK           | 11 | 1874 | 1.00 | 0.20 | 20  |
| 7  | W07B8.5                                               | LWTAGHQVIPK           | 11 | 3545 | 1.04 | 0.14 | 14  |
| 7  | W07B8.5                                               | LWTAGHQVIPK           | 14 | 2655 | 1.11 | 0.11 | 10  |

|             |                            |    |       |      |      |    |
|-------------|----------------------------|----|-------|------|------|----|
| 10 W07B8.5  | LWTAGHQVIPK                | 31 | 2141  | 1.16 | 0.10 | 9  |
| 1 W07B8.5   | NNYATPYLQDK                | 28 | 3079  | 1.42 | 0.09 | 6  |
| 10 W07B8.5  | LWTAGHQVIPK                | 16 | 1393  | 1.58 | 0.18 | 11 |
| 1 W07B8.5   | NNYATPYLQDK                | 15 | 2043  | 1.77 | 0.14 | 8  |
| 7 W07B8.5   | NNYATPYLQDK                | 19 | 2583  | 1.80 | 0.08 | 5  |
| 22 W07B8.5  | NNYATPYLQDK                | 16 | 1687  | 2.05 | 0.12 | 6  |
| 1 W07B8.5   | LWTAGHQVIPK                | 32 | 1642  | 2.09 | 0.13 | 6  |
| 7 W07B8.5   | NNYATPYLQDK                | 30 | 2664  | 2.10 | 0.14 | 7  |
| 7 W07B8.5   | NNYATPYLQDK                | 23 | 1673  | 2.43 | 0.15 | 6  |
| 22 W07B8.5  | NNYATPYLQDK                | 16 | 1905  | 2.44 | 0.10 | 4  |
| 22 W07E11.1 | SVIEQLNLK                  | 21 | 2394  | 0.88 | 0.18 | 21 |
| 10 W07E11.1 | HAQIFEIVGLAK               | 45 | 1051  | 1.31 | 0.23 | 18 |
| 10 W07E11.1 | GQFNTHQLFK                 | 44 | 959   | 1.78 | 0.09 | 5  |
| 1 W07E11.1  | HVPADFLLK                  | 11 | 2493  | 1.81 | 0.26 | 14 |
| 10 W07E11.1 | HVPADFLLK                  | 12 | 1098  | 1.89 | 0.20 | 11 |
| 10 W07E11.1 | HVPADFLLK                  | 12 | 4213  | 1.96 | 0.04 | 2  |
| 22 W07E11.1 | HVPADFLLK                  | 13 | 4977  | 2.01 | 0.09 | 4  |
| 1 W07E11.1  | HINEPLAIK                  | 11 | 511   | 2.05 | 0.19 | 9  |
| 10 W07E11.1 | HINEPLAIK                  | 18 | 3045  | 2.25 | 0.10 | 4  |
| 22 W07E11.1 | HINEPLAIK                  | 19 | 2717  | 2.64 | 0.06 | 2  |
| 10 W07E11.1 | HINEPLAIK                  | 12 | 3238  | 2.80 | 0.06 | 2  |
| 10 W07E11.1 | HINEPLAIK                  | 19 | 2347  | 2.82 | 0.07 | 3  |
| 10 W07E11.1 | HINEPLAIK                  | 14 | 3301  | 2.84 | 0.06 | 2  |
| 7 W07G4.4   | LNQLGLLAIGNSDTSARLEK       | 69 | 3363  | 0.26 | 0.06 | 24 |
| 7 W07G4.4   | LNQLGLLAIGNSDTSARLEK       | 48 | 8850  | 0.35 | 0.18 | 51 |
| 7 W07G4.4   | AIDVLKPK                   | 39 | 35166 | 0.38 | 0.15 | 40 |
| 22 W07G4.4  | AIDVLKPK                   | 36 | 23484 | 0.38 | 0.18 | 48 |
| 10 W07G4.4  | LNQLGLLAIGNSDTSARLEK       | 48 | 3299  | 0.39 | 0.14 | 37 |
| 7 W07G4.4   | RIHIYNTDAEGRLTMLDPLTLAK    | 53 | 17375 | 0.40 | 0.32 | 80 |
| 7 W07G4.4   | RIHIYNTDAEGRLTMLDPLTLAK    | 58 | 7276  | 0.42 | 0.37 | 89 |
| 7 W07G4.4   | LNQLGLLAIGNSDTSARLEK       | 54 | 9022  | 0.42 | 0.05 | 11 |
| 7 W07G4.4   | AIDVLKPK                   | 20 | 6058  | 0.44 | 0.38 | 85 |
| 10 W07G4.4  | AIDVLKPK                   | 39 | 27681 | 0.47 | 0.17 | 36 |
| 22 W07G4.4  | RIHIYNTDAEGRLTMLDPLTLAK    | 16 | 1950  | 0.48 | 0.07 | 15 |
| 7 W07G4.4   | AIDVLKPK                   | 36 | 42371 | 0.49 | 0.38 | 77 |
| 10 W07G4.4  | LNQLGLLAIGNSDTSARLEK       | 23 | 3590  | 0.50 | 0.13 | 27 |
| 10 W07G4.4  | AIDVLKPK                   | 39 | 26544 | 0.53 | 0.14 | 26 |
| 22 W07G4.4  | AIDVLKPK                   | 39 | 28514 | 0.54 | 0.16 | 29 |
| 7 W07G4.4   | GISMALSAGVK                | 87 | 16559 | 0.56 | 0.14 | 26 |
| 7 W07G4.4   | GISMALSAGVK                | 76 | 14709 | 0.58 | 0.13 | 22 |
| 22 W07G4.4  | RIHIYNTDAEGRLTMLDPLTLAK    | 29 | 10704 | 0.61 | 0.15 | 24 |
| 10 W07G4.4  | RIHIYNTDAEGRLTMLDPLTLAK    | 27 | 2677  | 0.65 | 0.21 | 32 |
| 10 W07G4.4  | RIHIYNTDAEGRLTMLDPLTLAK    | 27 | 8566  | 0.67 | 0.16 | 24 |
| 22 W07G4.4  | RIHIYNTDAEGRLTMLDPLTLAK    | 23 | 2468  | 0.67 | 0.15 | 22 |
| 22 W07G4.4  | LNQLGLLAIGNSDTSARLEK       | 31 | 4729  | 0.69 | 0.20 | 29 |
| 22 W07G4.4  | RIHIYNTDAEGRLTMLDPLTLAK    | 33 | 9300  | 0.71 | 0.14 | 20 |
| 22 W07G4.4  | LNQLGLLAIGNSDTSARLEK       | 56 | 5284  | 0.78 | 0.14 | 18 |
| 1 W07G4.4   | GISMALSAGVK                | 51 | 4287  | 0.81 | 0.07 | 9  |
| 10 W07G4.4  | RIHIYNTDAEGRLTMLDPLTLAK    | 21 | 11995 | 0.81 | 0.11 | 14 |
| 1 W07G4.4   | GISMALSAGVK                | 63 | 5389  | 0.95 | 0.09 | 10 |
| 10 W07G4.4  | GISMALSAGVK                | 50 | 5865  | 0.96 | 0.09 | 9  |
| 7 W07G4.4   | RIHIYNTDAEGRLTMLDPLTLAK    | 48 | 8612  | 0.99 | 0.32 | 33 |
| 1 W07G4.4   | YGSVVGGFFK                 | 14 | 1939  | 1.03 | 0.13 | 12 |
| 10 W07G4.4  | GISMALSAGVK                | 54 | 5572  | 1.06 | 0.20 | 19 |
| 1 W07G4.4   | GISMALSAGVK                | 82 | 8026  | 1.19 | 0.11 | 9  |
| 1 W07G4.4   | AIDVLKPK                   | 36 | 11838 | 1.22 | 0.44 | 37 |
| 7 W07G4.4   | GISMALSAGVK                | 66 | 10104 | 1.33 | 0.12 | 9  |
| 1 W07G4.4   | GISMALSAGVK                | 66 | 8468  | 1.36 | 0.09 | 6  |
| 7 W07G4.4   | GISMALSAGVK                | 65 | 7303  | 1.52 | 0.12 | 8  |
| 22 W07G4.4  | YGSVVGGFFK                 | 14 | 2664  | 1.53 | 0.11 | 7  |
| 10 W07G4.4  | GISMALSAGVK                | 72 | 15275 | 1.70 | 0.04 | 3  |
| 22 W07G4.4  | GISMALSAGVK                | 11 | 1984  | 1.71 | 0.28 | 16 |
| 10 W07G4.4  | GISMALSAGVK                | 78 | 12924 | 1.80 | 0.14 | 8  |
| 22 W07G4.4  | GISMALSAGVK                | 67 | 10197 | 2.00 | 0.09 | 4  |
| 22 W07G4.4  | GISMALSAGVK                | 74 | 14371 | 2.10 | 0.11 | 5  |
| 22 W07G4.4  | GISMALSAGVK                | 23 | 1920  | 2.15 | 0.15 | 7  |
| 1 W08E12.7  | EGELVAQFK                  | 31 | 1436  | 0.31 | 0.14 | 44 |
| 22 W08E12.7 | EGELVAQFK                  | 60 | 6693  | 0.36 | 0.13 | 36 |
| 22 W08E12.7 | ASRVFFSDVNK                | 38 | 6809  | 0.38 | 0.09 | 24 |
| 22 W08E12.7 | EGELVAQFK                  | 67 | 9727  | 0.40 | 0.08 | 21 |
| 7 W08E12.7  | ASRVFFSDVNK                | 14 | 1632  | 0.40 | 0.30 | 76 |
| 22 W08E12.7 | EGELVAQFK                  | 43 | 3149  | 0.42 | 0.21 | 48 |
| 22 W08E12.7 | ASRVFFSDVNK                | 11 | 1174  | 0.44 | 0.07 | 17 |
| 22 W08E12.7 | LILEK                      | 20 | 961   | 0.44 | 0.24 | 55 |
| 22 W08E12.7 | HEAYAIDILFSTGK             | 30 | 2556  | 0.45 | 0.17 | 37 |
| 7 W08E12.7  | EGELVAQFK                  | 33 | 1623  | 0.46 | 0.15 | 33 |
| 22 W08E12.7 | ASRVFFSDVNK                | 39 | 10152 | 0.46 | 0.14 | 30 |
| 1 W08E12.7  | ASRVFFSDVNK                | 12 | 2397  | 0.48 | 0.02 | 3  |
| 7 W08E12.7  | EVLANIK                    | 15 | 1472  | 0.50 | 0.28 | 55 |
| 22 W08E12.7 | HEAYAIDILFSTGK             | 89 | 3682  | 0.53 | 0.15 | 29 |
| 22 W08E12.7 | IAGLPFDSDVYQSDLTVK         | 58 | 1838  | 0.55 | 0.13 | 23 |
| 22 W08E12.7 | ATVLVMPNGLLK               | 35 | 1123  | 0.57 | 0.15 | 27 |
| 1 W08E12.7  | ATVLVMPNGLLK               | 12 | 778   | 0.57 | 0.17 | 29 |
| 7 W08E12.7  | EVLANIK                    | 13 | 1205  | 0.60 | 0.24 | 40 |
| 22 W08E12.7 | HEAYAIDILFSTGK             | 75 | 2652  | 0.60 | 0.10 | 17 |
| 7 W08E12.7  | EVLANIK                    | 18 | 992   | 0.61 | 0.25 | 41 |
| 7 W08E12.7  | NEQVSYQLK                  | 36 | 1960  | 0.61 | 0.18 | 29 |
| 10 W08E12.7 | ASRVFFSDVNK                | 11 | 1291  | 0.62 | 0.29 | 46 |
| 22 W08E12.7 | NEQVSYQLK                  | 27 | 2578  | 0.63 | 0.06 | 9  |
| 22 W08E12.7 | TAAEFGLTPIENMLSHQLERNEIDGK | 14 | 3575  | 0.64 | 0.15 | 23 |
| 22 W08E12.7 | ATVLVMPNGLLK               | 38 | 2931  | 0.64 | 0.20 | 31 |
| 22 W08E12.7 | EGELVAQFK                  | 41 | 3456  | 0.68 | 0.18 | 26 |
| 22 W08E12.7 | HEAYAIDILFSTGK             | 34 | 3306  | 0.69 | 0.18 | 26 |
| 22 W08E12.7 | ATVLVMPNGLLK               | 38 | 2169  | 0.71 | 0.07 | 10 |
| 22 W08E12.7 | ASRVFFSDVNK                | 17 | 1600  | 0.71 | 0.10 | 15 |
| 22 W08E12.7 | IAGLPFDSDVYQSDLTVK         | 57 | 1619  | 0.75 | 0.03 | 4  |
| 10 W08E12.7 | EGELVAQFK                  | 21 | 3094  | 0.75 | 0.14 | 19 |
| 22 W08E12.7 | TAAEFGLTPIENMLSHQLERNEIDGK | 25 | 6795  | 0.76 | 0.13 | 17 |
| 7 W08E12.7  | EVLANIK                    | 10 | 1271  | 0.79 | 0.24 | 30 |
| 22 W08E12.7 | NEQVSYQLK                  | 33 | 2249  | 0.80 | 0.17 | 21 |
| 22 W08E12.7 | HEAYAIDILFSTGK             | 26 | 2095  | 0.80 | 0.29 | 37 |

|             |                              |     |       |       |      |     |
|-------------|------------------------------|-----|-------|-------|------|-----|
| 22 W08E12.7 | ATVLVMPNGLLK                 | 17  | 1646  | 0.80  | 0.06 | 8   |
| 22 W08E12.7 | HEAYAI DILFSTGK              | 23  | 3157  | 0.82  | 0.23 | 28  |
| 7 W08E12.7  | EGELVAQFK                    | 26  | 2107  | 0.82  | 0.17 | 21  |
| 22 W08E12.7 | IAGLPFDS DVYQSDLT VK         | 92  | 1748  | 0.82  | 0.21 | 26  |
| 22 W08E12.7 | NEQVSYQLK                    | 27  | 18126 | 0.82  | 0.07 | 9   |
| 22 W08E12.7 | ATVLVMPNGLLK                 | 34  | 1037  | 0.83  | 0.12 | 15  |
| 22 W08E12.7 | EGELVAQFK                    | 57  | 6782  | 0.83  | 0.15 | 18  |
| 7 W08E12.7  | ASRVFFSDVNK                  | 24  | 1451  | 0.84  | 0.26 | 31  |
| 22 W08E12.7 | NEQVSYQLK                    | 27  | 19144 | 0.85  | 0.09 | 10  |
| 22 W08E12.7 | NEQVSYQLK                    | 49  | 2988  | 0.85  | 0.07 | 8   |
| 22 W08E12.7 | ATVLVMPNGLLK                 | 16  | 1497  | 0.86  | 0.16 | 18  |
| 22 W08E12.7 | TAAEFGLTPIENMLSHQLERNEIDG EK | 23  | 4937  | 0.95  | 0.17 | 18  |
| 10 W08E12.7 | ASRVFFSDVNK                  | 28  | 5665  | 0.98  | 0.05 | 6   |
| 22 W08E12.7 | YGLLVPPYVLYEK                | 13  | 798   | 0.98  | 0.09 | 9   |
| 22 W08E12.7 | ASRVFFSDVNK                  | 37  | 1787  | 0.99  | 0.21 | 21  |
| 22 W08E12.7 | EGELVAQFK                    | 50  | 4350  | 1.02  | 0.06 | 6   |
| 22 W08E12.7 | IAGLPFDS DVYQSDLT VK         | 19  | 1652  | 1.02  | 0.11 | 11  |
| 10 W08E12.7 | ASRVFFSDVNK                  | 15  | 2157  | 1.03  | 0.12 | 12  |
| 22 W08E12.7 | ASRVFFSDVNK                  | 24  | 7968  | 1.10  | 0.15 | 13  |
| 7 W08E12.7  | EVLANIK                      | 11  | 1274  | 1.10  | 0.27 | 25  |
| 22 W08E12.7 | DPELQAVLK                    | 24  | 4742  | 1.11  | 0.16 | 14  |
| 22 W08E12.7 | DMDTRTTVFRK                  | 17  | 10812 | 1.14  | 0.16 | 14  |
| 22 W08E12.7 | IAGLPFDS DVYQSDLT VK         | 17  | 2476  | 1.17  | 0.30 | 25  |
| 22 W08E12.7 | ASRVFFSDVNK                  | 21  | 2235  | 1.21  | 0.09 | 7   |
| 22 W08E12.7 | ASRVFFSDVNK                  | 21  | 5386  | 1.22  | 0.17 | 14  |
| 22 W08E12.7 | YQVAAEITNAVLK                | 113 | 3291  | 1.23  | 0.16 | 13  |
| 22 W08E12.7 | DPELQAVLK                    | 28  | 5431  | 1.28  | 0.19 | 15  |
| 7 W08E12.7  | NEQVSYQLK                    | 12  | 1172  | 1.28  | 0.06 | 5   |
| 22 W08E12.7 | TAAEFGLTPIENMLSHQLERNEIDG EK | 24  | 4662  | 1.33  | 0.25 | 19  |
| 22 W08E12.7 | YQVAAEITNAVLK                | 110 | 2345  | 1.34  | 0.13 | 10  |
| 10 W08E12.7 | YGLLVPPYVLYEK                | 26  | 899   | 1.38  | 0.12 | 9   |
| 10 W08E12.7 | YGLLVPPYVLYEK                | 17  | 1252  | 1.49  | 0.13 | 9   |
| 22 W08E12.7 | SEAPVVLK                     | 19  | 16434 | 1.63  | 0.22 | 13  |
| 22 W08E12.7 | VHGPMPFSLRSFEEVK             | 13  | 2395  | 1.64  | 0.38 | 23  |
| 22 W08E12.7 | VHGPMPFSLRSFEEVK             | 10  | 5751  | 1.64  | 0.11 | 7   |
| 22 W08E12.7 | SEAPVVLK                     | 19  | 2805  | 6.95  | 0.34 | 5   |
| 10 W08E12.7 | YQVAAEITNAVLK                | 67  | 1876  | 10.63 | 0.46 | 4   |
| 1 W08E3.3   | GFIMAEVMK                    | 41  | 2310  | 0.15  | 0.35 | 226 |
| 1 W08E3.3   | IVHTGYK                      | 15  | 1458  | 0.21  | 0.21 | 103 |
| 1 W08E3.3   | DLQFIDGPLDK                  | 47  | 1120  | 0.25  | 0.50 | 199 |
| 22 W08E3.3  | VGILGLPNVGK                  | 42  | 12223 | 0.38  | 0.05 | 12  |
| 22 W08E3.3  | VADLIELGDEAK                 | 74  | 3669  | 0.41  | 0.14 | 35  |
| 22 W08E3.3  | LLDMPEDERQK                  | 37  | 11860 | 0.46  | 0.25 | 54  |
| 10 W08E3.3  | DLQFIDGPLDK                  | 24  | 955   | 0.46  | 0.07 | 15  |
| 22 W08E3.3  | VGILGLPNVGK                  | 49  | 10028 | 0.51  | 0.09 | 17  |
| 22 W08E3.3  | DLQFIDGPLDK                  | 43  | 1896  | 0.51  | 0.20 | 39  |
| 10 W08E3.3  | DLQFIDGPLDK                  | 25  | 1400  | 0.52  | 0.13 | 25  |
| 10 W08E3.3  | DLQFIDGPLDK                  | 22  | 1095  | 0.52  | 0.10 | 19  |
| 22 W08E3.3  | FNAGAGLQAK                   | 50  | 12275 | 0.54  | 0.21 | 40  |
| 22 W08E3.3  | VADLIELGDEAK                 | 106 | 3692  | 0.60  | 0.23 | 38  |
| 10 W08E3.3  | DLQFIDGPLDK                  | 21  | 1187  | 0.61  | 0.17 | 28  |
| 22 W08E3.3  | TYIVQDGDVIFFK                | 67  | 3679  | 0.62  | 0.19 | 30  |
| 22 W08E3.3  | DLQFIDGPLDK                  | 22  | 750   | 0.64  | 0.16 | 26  |
| 10 W08E3.3  | VGILGLPNVGK                  | 13  | 1733  | 0.69  | 0.11 | 16  |
| 22 W08E3.3  | LLDMPEDERQK                  | 30  | 10803 | 0.69  | 0.21 | 30  |
| 22 W08E3.3  | VPAFLNVTDIAGLVK              | 87  | 2552  | 0.73  | 0.16 | 21  |
| 22 W08E3.3  | VGILGLPNVGK                  | 20  | 1920  | 0.73  | 0.10 | 14  |
| 22 W08E3.3  | STFFNVLTK                    | 43  | 2038  | 0.75  | 0.18 | 24  |
| 22 W08E3.3  | STFFNVLTK                    | 21  | 855   | 0.82  | 0.24 | 30  |
| 22 W08E3.3  | KPVRQELWNEK                  | 35  | 2461  | 0.83  | 0.38 | 46  |
| 22 W08E3.3  | TYIVQDGDVIFFK                | 65  | 1849  | 0.85  | 0.12 | 14  |
| 22 W08E3.3  | STFFNVLTK                    | 28  | 1747  | 0.88  | 0.13 | 14  |
| 22 W08E3.3  | FNAGAGLQAK                   | 40  | 10915 | 0.93  | 0.21 | 22  |
| 22 W08E3.3  | AAGRIHTDFEK                  | 34  | 7134  | 0.94  | 0.14 | 15  |
| 22 W08E3.3  | ALQLEYFTSGEDEVK              | 115 | 1753  | 0.95  | 0.17 | 18  |
| 22 W08E3.3  | VGILGLPNVGK                  | 16  | 1736  | 0.97  | 0.15 | 16  |
| 22 W08E3.3  | EIEILNK                      | 23  | 4131  | 0.99  | 0.14 | 14  |
| 22 W08E3.3  | AAGRIHTDFEK                  | 19  | 8120  | 1.00  | 0.18 | 18  |
| 1 W08E3.3   | VGILGLPNVGK                  | 15  | 2369  | 1.03  | 0.15 | 14  |
| 10 W08E3.3  | IVHTGYK                      | 14  | 4574  | 1.06  | 0.11 | 10  |
| 22 W08E3.3  | DLQFIDGPLDK                  | 26  | 1521  | 1.07  | 0.09 | 8   |
| 22 W08E3.3  | GFIMAEVMK                    | 33  | 2675  | 1.09  | 0.06 | 5   |
| 22 W08E3.3  | GFIMAEVMK                    | 52  | 9928  | 1.12  | 0.07 | 6   |
| 1 W08E3.3   | VGILGLPNVGK                  | 13  | 1748  | 1.14  | 0.07 | 6   |
| 10 W08E3.3  | VGILGLPNVGK                  | 16  | 6799  | 1.14  | 0.66 | 58  |
| 22 W08E3.3  | ALQLEYFTSGEDEVK              | 97  | 1564  | 1.16  | 0.18 | 15  |
| 22 W08E3.3  | GFIMAEVMK                    | 28  | 9443  | 1.23  | 0.12 | 10  |
| 10 W08E3.3  | STFFNVLTK                    | 13  | 724   | 1.25  | 0.17 | 14  |
| 10 W08E3.3  | IVHTGYK                      | 15  | 2795  | 1.25  | 0.16 | 13  |
| 22 W08E3.3  | GFIMAEVMK                    | 30  | 2002  | 1.26  | 0.11 | 9   |
| 22 W08E3.3  | GFIMAEVMK                    | 37  | 4971  | 1.29  | 0.17 | 14  |
| 22 W08E3.3  | EIEILNK                      | 20  | 1491  | 1.31  | 0.31 | 23  |
| 22 W08E3.3  | VPAFLNVTDIAGLVK              | 94  | 4442  | 1.33  | 0.13 | 10  |
| 10 W08E3.3  | VGILGLPNVGK                  | 16  | 8524  | 1.34  | 0.68 | 51  |
| 22 W08E3.3  | FNAGAGLQAK                   | 54  | 5621  | 1.34  | 0.07 | 6   |
| 22 W08E3.3  | GFIMAEVMK                    | 24  | 7724  | 1.35  | 0.11 | 8   |
| 22 W08E3.3  | FNAGAGLQAK                   | 68  | 7966  | 1.36  | 0.12 | 9   |
| 22 W08E3.3  | GFIMAEVMK                    | 24  | 9415  | 1.37  | 0.12 | 9   |
| 22 W08E3.3  | VGILGLPNVGK                  | 25  | 10458 | 1.40  | 0.10 | 7   |
| 22 W08E3.3  | GFIMAEVMK                    | 55  | 12556 | 1.43  | 0.10 | 7   |
| 22 W08E3.3  | GFIMAEVMK                    | 30  | 9840  | 1.45  | 0.15 | 11  |
| 22 W08E3.3  | VPAFLNVTDIAGLVK              | 82  | 7023  | 1.49  | 0.12 | 8   |
| 22 W08E3.3  | STFFNVLTK                    | 37  | 2368  | 1.60  | 0.22 | 14  |
| 22 W08E3.3  | VGILGLPNVGK                  | 15  | 8162  | 1.67  | 0.09 | 5   |
| 22 W08E3.3  | IVHTGYK                      | 45  | 24677 | 1.68  | 0.16 | 10  |
| 22 W08E3.3  | VADLIELGDEAK                 | 42  | 1226  | 1.79  | 0.21 | 12  |
| 22 W08E3.3  | VADLIELGDEAK                 | 62  | 2683  | 2.04  | 0.12 | 6   |
| 22 W08E3.3  | VADLIELGDEAK                 | 60  | 3440  | 2.20  | 0.13 | 6   |
| 22 W08E3.3  | TYIVQDGDVIFFK                | 12  | 656   | 2.29  | 0.18 | 8   |
| 22 W08E3.3  | GFIMAEVMK                    | 48  | 2521  | 2.50  | 0.09 | 4   |
| 22 W08E3.3  | GFIMAEVMK                    | 40  | 1469  | 2.67  | 0.15 | 6   |

|    |                   |                          |    |      |       |      |    |
|----|-------------------|--------------------------|----|------|-------|------|----|
| 22 | W08E3.3           | STFFNVLTK                | 16 | 1967 | 2.72  | 0.12 | 4  |
| 22 | W08E3.3           | TYIVQDGDVIFFK            | 59 | 1652 | 2.96  | 0.18 | 6  |
| 1  | W08E3.3           | VGILGLPNVGK              | 16 | 1028 | 3.75  | 0.31 | 8  |
| 22 | W08E3.3           | STFFNVLTK                | 19 | 1031 | 4.70  | 0.17 | 4  |
| 10 | W08E3.3           | STFFNVLTK                | 19 | 1388 | 4.90  | 0.24 | 5  |
| 1  | W08E3.3           | VGILGLPNVGK              | 20 | 1295 | 5.13  | 0.09 | 2  |
| 10 | W08E3.3           | STFFNVLTK                | 21 | 2146 | 6.08  | 0.49 | 8  |
| 10 | W08E3.3           | GFIMAEVMK                | 43 | 4270 | 13.74 | 0.25 | 2  |
| 10 | W08E3.3           | GFIMAEVMK                | 45 | 4194 | 28.93 | 0.39 | 1  |
| 7  | W08E3.3;W08E3.3b  | VGILGLPNVGK              | 10 | 712  | 0.26  | 0.16 | 61 |
| 7  | W08E3.3;W08E3.3b  | VGILGLPNVGK              | 13 | 938  | 0.30  | 0.25 | 85 |
| 7  | W08E3.3;W08E3.3b  | EIEILNK                  | 32 | 1770 | 0.33  | 0.06 | 18 |
| 7  | W08E3.3;W08E3.3b  | VGILGLPNVGK              | 16 | 1505 | 0.41  | 0.32 | 78 |
| 7  | W08E3.3;W08E3.3b  | DLQFIDGPLDK              | 68 | 2511 | 0.49  | 0.16 | 33 |
| 7  | W08E3.3;W08E3.3b  | DLQFIDGPLDK              | 27 | 1421 | 0.50  | 0.31 | 62 |
| 7  | W08E3.3;W08E3.3b  | DLQFIDGPLDK              | 72 | 1978 | 0.50  | 0.14 | 28 |
| 7  | W08E3.3;W08E3.3b  | STFFNVLTK                | 20 | 923  | 0.65  | 0.26 | 40 |
| 7  | W08E3.3;W08E3.3b  | DLQFIDGPLDK              | 67 | 2272 | 0.71  | 0.21 | 30 |
| 7  | W08E3.3;W08E3.3b  | VGILGLPNVGK              | 16 | 1674 | 0.78  | 0.06 | 8  |
| 7  | W08E3.3;W08E3.3b  | GFIMAEVMK                | 27 | 956  | 0.81  | 0.14 | 17 |
| 7  | W08E3.3;W08E3.3b  | VGILGLPNVGK              | 22 | 1542 | 0.88  | 0.10 | 11 |
| 7  | W08E3.3;W08E3.3b  | DLQFIDGPLDK              | 35 | 1695 | 0.90  | 0.20 | 22 |
| 7  | W08E3.3;W08E3.3b  | IVHTGYK                  | 29 | 4293 | 0.93  | 0.18 | 19 |
| 7  | W08E3.3;W08E3.3b  | IVHTGYK                  | 14 | 3709 | 0.94  | 0.14 | 15 |
| 7  | W08E3.3;W08E3.3b  | GFIMAEVMK                | 31 | 2337 | 0.98  | 0.11 | 11 |
| 7  | W08E3.3;W08E3.3b  | STFFNVLTK                | 17 | 937  | 1.01  | 0.15 | 14 |
| 7  | W08E3.3;W08E3.3b  | VGILGLPNVGK              | 15 | 769  | 1.07  | 0.15 | 14 |
| 7  | W08E3.3;W08E3.3b  | VGILGLPNVGK              | 21 | 2206 | 1.07  | 0.07 | 7  |
| 7  | W08E3.3;W08E3.3b  | GFIMAEVMK                | 41 | 2963 | 1.18  | 0.03 | 3  |
| 7  | W08E3.3;W08E3.3b  | GFIMAEVMK                | 13 | 3142 | 1.21  | 0.08 | 7  |
| 7  | W08E3.3;W08E3.3b  | GFIMAEVMK                | 34 | 3052 | 1.40  | 0.12 | 8  |
| 7  | W08E3.3;W08E3.3b  | IVHTGYK                  | 28 | 9102 | 1.55  | 0.16 | 10 |
| 7  | W08E3.3;W08E3.3b  | FNAGAGLQAK               | 16 | 1436 | 1.71  | 0.14 | 8  |
| 7  | W08E3.3;W08E3.3b  | GFIMAEVMK                | 23 | 1494 | 1.89  | 0.22 | 12 |
| 7  | W08E3.3;W08E3.3b  | GFIMAEVMK                | 16 | 774  | 2.06  | 0.13 | 6  |
| 7  | W08E3.3;W08E3.3b  | IVHTGYK                  | 21 | 3478 | 2.24  | 0.30 | 14 |
| 7  | W08E3.3;W08E3.3b  | VADLIELGDEAK             | 45 | 1344 | 2.73  | 0.10 | 4  |
| 7  | W08E3.3;W08E3.3b  | VADLIELGDEAK             | 54 | 1017 | 2.86  | 0.12 | 4  |
| 22 | W08G11.4          | GAIVETIYPAVIK            | 32 | 1580 | 1.14  | 0.05 | 4  |
| 22 | W08G11.4          | GAIVETIYPAVIK            | 40 | 1811 | 1.30  | 0.12 | 9  |
| 1  | W08G11.4          | GAIVETIYPAVIK            | 21 | 851  | 1.61  | 0.22 | 14 |
| 1  | W08G11.4          | GAIVETIYPAVIK            | 29 | 812  | 1.97  | 0.22 | 11 |
| 7  | W09B6.1a;W09B6.1b | LSTVRVSQHDDPTSNTFAK      | 14 | 3884 | 0.43  | 0.12 | 29 |
| 10 | W09B6.1a;W09B6.1b | LSTVRVSQHDDPTSNTFAK      | 20 | 7399 | 0.47  | 0.12 | 27 |
| 22 | W09B6.1a;W09B6.1b | IRPEFIHLVADEK            | 13 | 7305 | 0.57  | 0.26 | 47 |
| 22 | W09B6.1a;W09B6.1b | VTVNNEIITFEK             | 41 | 1819 | 0.60  | 0.23 | 39 |
| 10 | W09B6.1a;W09B6.1b | DVVRTIYSHTQIK            | 33 | 2282 | 0.63  | 0.14 | 23 |
| 10 | W09B6.1a;W09B6.1b | VTVNNEIITFEK             | 14 | 941  | 0.64  | 0.24 | 37 |
| 10 | W09B6.1a;W09B6.1b | LSTVRVSQHDDPTSNTFAK      | 22 | 8379 | 0.64  | 0.15 | 24 |
| 22 | W09B6.1a;W09B6.1b | DLNIYSLK                 | 31 | 744  | 0.68  | 0.15 | 22 |
| 10 | W09B6.1a;W09B6.1b | DRLPANSYPVLSK            | 12 | 1509 | 0.68  | 0.22 | 32 |
| 10 | W09B6.1a;W09B6.1b | VIGSQEQLEFMK             | 19 | 790  | 0.71  | 0.14 | 19 |
| 22 | W09B6.1a;W09B6.1b | APGRLQRVVNEGDPHIPGGSVLAK | 11 | 4870 | 0.73  | 0.20 | 27 |
| 22 | W09B6.1a;W09B6.1b | VTVNNEIITFEK             | 37 | 1771 | 0.74  | 0.09 | 12 |
| 1  | W09B6.1a;W09B6.1b | VTVNNEIITFEK             | 34 | 881  | 0.74  | 0.08 | 10 |
| 22 | W09B6.1a;W09B6.1b | VIGSQEQLEFMK             | 34 | 1583 | 0.75  | 0.18 | 24 |
| 10 | W09B6.1a;W09B6.1b | LSTVRVSQHDDPTSNTFAK      | 11 | 6774 | 0.75  | 0.11 | 14 |
| 10 | W09B6.1a;W09B6.1b | SRGGILEPNAVVGIK          | 35 | 1651 | 0.77  | 0.14 | 18 |
| 7  | W09B6.1a;W09B6.1b | DLNIYSLK                 | 18 | 756  | 0.78  | 0.20 | 25 |
| 7  | W09B6.1a;W09B6.1b | LSTVRVSQHDDPTSNTFAK      | 10 | 3031 | 0.79  | 0.22 | 28 |
| 10 | W09B6.1a;W09B6.1b | SRGGILEPNAVVGIK          | 31 | 716  | 0.79  | 0.14 | 17 |
| 10 | W09B6.1a;W09B6.1b | HQINEVEVVYESVDGHK        | 18 | 4511 | 0.81  | 0.16 | 20 |
| 10 | W09B6.1a;W09B6.1b | DVVRTIYSHTQIK            | 14 | 1862 | 0.83  | 0.16 | 20 |
| 22 | W09B6.1a;W09B6.1b | VTVNNEIITFEK             | 41 | 1952 | 0.83  | 0.14 | 17 |
| 10 | W09B6.1a;W09B6.1b | SRGGILEPNAVVGIK          | 35 | 2539 | 0.84  | 0.25 | 30 |
| 7  | W09B6.1a;W09B6.1b | DVVRTIYSHTQIK            | 15 | 2442 | 0.85  | 0.16 | 19 |
| 10 | W09B6.1a;W09B6.1b | DRLPANSYPVLSK            | 42 | 2146 | 0.86  | 0.09 | 11 |
| 10 | W09B6.1a;W09B6.1b | THNIGFPLMIK              | 27 | 1701 | 0.89  | 0.11 | 13 |
| 10 | W09B6.1a;W09B6.1b | SRGGILEPNAVVGIK          | 17 | 588  | 0.90  | 0.16 | 18 |
| 10 | W09B6.1a;W09B6.1b | SRGGILEPNAVVGIK          | 34 | 1423 | 0.90  | 0.16 | 18 |
| 10 | W09B6.1a;W09B6.1b | SRGGILEPNAVVGIK          | 32 | 2493 | 0.90  | 0.08 | 9  |
| 22 | W09B6.1a;W09B6.1b | VIGSQEQLEFMK             | 34 | 1451 | 0.91  | 0.15 | 17 |
| 22 | W09B6.1a;W09B6.1b | LSTVRVSQHDDPTSNTFAK      | 13 | 5064 | 0.92  | 0.22 | 24 |
| 1  | W09B6.1a;W09B6.1b | VTVNNEIITFEK             | 37 | 1000 | 0.93  | 0.13 | 14 |
| 22 | W09B6.1a;W09B6.1b | DRLPANSYPVLSK            | 18 | 1482 | 0.94  | 0.14 | 15 |
| 7  | W09B6.1a;W09B6.1b | NNYSEITASGLRPTGQEVK      | 27 | 3154 | 0.94  | 0.11 | 12 |
| 1  | W09B6.1a;W09B6.1b | THNIGFPLMIK              | 14 | 1681 | 0.94  | 0.17 | 18 |
| 22 | W09B6.1a;W09B6.1b | NNYSEITASGLRPTGQEVK      | 20 | 2459 | 0.94  | 0.23 | 24 |
| 10 | W09B6.1a;W09B6.1b | DVVRTIYSHTQIK            | 39 | 2287 | 0.94  | 0.17 | 18 |
| 10 | W09B6.1a;W09B6.1b | THNIGFPLMIK              | 28 | 1737 | 0.96  | 0.07 | 8  |
| 22 | W09B6.1a;W09B6.1b | LSTVRVSQHDDPTSNTFAK      | 11 | 4368 | 0.96  | 0.16 | 16 |
| 1  | W09B6.1a;W09B6.1b | LSTVRVSQHDDPTSNTFAK      | 14 | 3354 | 0.97  | 0.15 | 15 |
| 10 | W09B6.1a;W09B6.1b | DRLPANSYPVLSK            | 10 | 1618 | 0.98  | 0.19 | 20 |
| 10 | W09B6.1a;W09B6.1b | NNYSEITASGLRPTGQEVK      | 33 | 3801 | 1.01  | 0.18 | 18 |
| 10 | W09B6.1a;W09B6.1b | VIGSQEQLEFMK             | 30 | 1098 | 1.02  | 0.08 | 8  |
| 10 | W09B6.1a;W09B6.1b | THNIGFPLMIK              | 30 | 1304 | 1.02  | 0.10 | 9  |
| 22 | W09B6.1a;W09B6.1b | DRLPANSYPVLSK            | 13 | 1161 | 1.02  | 0.15 | 14 |
| 22 | W09B6.1a;W09B6.1b | DLNIYSLK                 | 22 | 997  | 1.03  | 0.23 | 22 |
| 7  | W09B6.1a;W09B6.1b | DRLPANSYPVLSK            | 33 | 1064 | 1.04  | 0.26 | 25 |
| 10 | W09B6.1a;W09B6.1b | DLNIYSLK                 | 17 | 665  | 1.05  | 0.15 | 15 |
| 10 | W09B6.1a;W09B6.1b | NNYSEITASGLRPTGQEVK      | 34 | 3845 | 1.06  | 0.15 | 15 |
| 22 | W09B6.1a;W09B6.1b | IRPEFIHLVADEK            | 11 | 3988 | 1.06  | 0.11 | 10 |
| 10 | W09B6.1a;W09B6.1b | CTIDHFTLTATPK            | 53 | 817  | 1.08  | 0.20 | 19 |
| 22 | W09B6.1a;W09B6.1b | NNFANVDEILK              | 32 | 1075 | 1.09  | 0.18 | 16 |
| 22 | W09B6.1a;W09B6.1b | SRGGILEPNAVVGIK          | 27 | 2125 | 1.11  | 0.18 | 16 |
| 1  | W09B6.1a;W09B6.1b | LSTVRVSQHDDPTSNTFAK      | 29 | 2929 | 1.13  | 0.12 | 11 |
| 10 | W09B6.1a;W09B6.1b | CTIDHFTLTATPK            | 53 | 815  | 1.13  | 0.17 | 15 |
| 10 | W09B6.1a;W09B6.1b | SRGGILEPNAVVGIK          | 38 | 1896 | 1.14  | 0.26 | 23 |
| 10 | W09B6.1a;W09B6.1b | THNIGFPLMIK              | 27 | 4482 | 1.14  | 0.15 | 14 |
| 10 | W09B6.1a;W09B6.1b | DRLPANSYPVLSK            | 59 | 1665 | 1.18  | 0.16 | 13 |
| 7  | W09B6.1a;W09B6.1b | DVVRTIYSHTQIK            | 12 | 1596 | 1.18  | 0.23 | 20 |

|    |                            |                           |    |       |      |      |    |
|----|----------------------------|---------------------------|----|-------|------|------|----|
| 10 | W09B6.1a;W09B6.1b          | DRLPANSYPVLSK             | 49 | 1533  | 1.21 | 0.16 | 14 |
| 22 | W09B6.1a;W09B6.1b          | SRGGILEPNAVVGIK           | 27 | 1751  | 1.21 | 0.14 | 11 |
| 10 | W09B6.1a;W09B6.1b          | SRGGILEPNAVVGIK           | 51 | 2372  | 1.21 | 0.19 | 16 |
| 22 | W09B6.1a;W09B6.1b          | DVVRTIYSHQIK              | 20 | 2634  | 1.23 | 0.12 | 10 |
| 10 | W09B6.1a;W09B6.1b          | SRGGILEPNAVVGIK           | 30 | 2202  | 1.24 | 0.12 | 10 |
| 10 | W09B6.1a;W09B6.1b          | NNFANVDEILK               | 51 | 1202  | 1.25 | 0.13 | 11 |
| 7  | W09B6.1a;W09B6.1b          | IRPEFIHLVADEK             | 11 | 4448  | 1.26 | 0.39 | 31 |
| 10 | W09B6.1a;W09B6.1b          | THNIGFFPLMIK              | 51 | 2697  | 1.27 | 0.06 | 4  |
| 22 | W09B6.1a;W09B6.1b          | NNYSEITASGLRPTGQEVK       | 28 | 2621  | 1.29 | 0.21 | 16 |
| 1  | W09B6.1a;W09B6.1b          | HQINEVEVVYESVDGHK         | 20 | 1552  | 1.29 | 0.17 | 13 |
| 10 | W09B6.1a;W09B6.1b          | SRGGILEPNAVVGIK           | 16 | 1294  | 1.30 | 0.15 | 12 |
| 1  | W09B6.1a;W09B6.1b          | NNYSEITASGLRPTGQEVK       | 28 | 1210  | 1.32 | 0.08 | 6  |
| 10 | W09B6.1a;W09B6.1b          | NNFANVDEILK               | 53 | 1169  | 1.32 | 0.17 | 13 |
| 22 | W09B6.1a;W09B6.1b          | THNIGFFPLMIK              | 57 | 4934  | 1.34 | 0.08 | 6  |
| 22 | W09B6.1a;W09B6.1b          | CTIDHFTLTATPK             | 19 | 486   | 1.34 | 0.15 | 11 |
| 22 | W09B6.1a;W09B6.1b          | DVVRTIYSHQIK              | 16 | 2067  | 1.37 | 0.26 | 19 |
| 7  | W09B6.1a;W09B6.1b          | HQINEVEVVYESVDGHK         | 32 | 1373  | 1.38 | 0.10 | 7  |
| 10 | W09B6.1a;W09B6.1b          | HQINEVEVVYESVDGHK         | 15 | 3728  | 1.39 | 0.18 | 13 |
| 10 | W09B6.1a;W09B6.1b          | DLNIYSLK                  | 18 | 659   | 1.40 | 0.16 | 11 |
| 1  | W09B6.1a;W09B6.1b          | THNIGFFPLMIK              | 14 | 1464  | 1.40 | 0.14 | 10 |
| 10 | W09B6.1a;W09B6.1b          | IRPEFIHLVADEK             | 15 | 3612  | 1.43 | 0.12 | 9  |
| 1  | W09B6.1a;W09B6.1b          | IRPEFIHLVADEK             | 13 | 1856  | 1.45 | 0.18 | 12 |
| 22 | W09B6.1a;W09B6.1b          | THNIGFFPLMIK              | 52 | 3964  | 1.45 | 0.18 | 13 |
| 22 | W09B6.1a;W09B6.1b          | IIEEAPAIASSHIRK           | 17 | 2890  | 1.45 | 0.19 | 13 |
| 7  | W09B6.1a;W09B6.1b          | THNIGFFPLMIK              | 48 | 2256  | 1.46 | 0.13 | 9  |
| 22 | W09B6.1a;W09B6.1b          | SRGGILEPNAVVGIK           | 23 | 785   | 1.50 | 0.13 | 9  |
| 22 | W09B6.1a;W09B6.1b          | HQINEVEVVYESVDGHK         | 24 | 2490  | 1.55 | 0.13 | 8  |
| 7  | W09B6.1a;W09B6.1b          | THNIGFFPLMIK              | 35 | 1719  | 1.70 | 0.17 | 10 |
| 1  | W09B6.1a;W09B6.1b          | DRLPANSYPVLSK             | 35 | 922   | 1.71 | 0.13 | 7  |
| 22 | W09B6.1a;W09B6.1b          | SRGGILEPNAVVGIK           | 30 | 928   | 1.72 | 0.13 | 7  |
| 1  | W09B6.1a;W09B6.1b          | SRGGILEPNAVVGIK           | 19 | 447   | 1.83 | 0.20 | 11 |
| 1  | W09B6.1a;W09B6.1b          | HQINEVEVVYESVDGHK         | 15 | 2198  | 1.95 | 0.12 | 6  |
| 22 | W09B6.1a;W09B6.1b          | IRPEFIHLVADEK             | 11 | 3878  | 1.96 | 0.16 | 8  |
| 7  | W09B6.1a;W09B6.1b          | SRGGILEPNAVVGIK           | 22 | 641   | 1.98 | 0.23 | 12 |
| 22 | W09B6.1a;W09B6.1b          | HQINEVEVVYESVDGHK         | 27 | 2175  | 2.01 | 0.26 | 13 |
| 22 | W09B6.1a;W09B6.1b          | LSTVVRVSQLDDPTSNFAK       | 16 | 3500  | 2.07 | 0.13 | 6  |
| 22 | W09B6.1a;W09B6.1b          | DRLPANSYPVLSK             | 35 | 1340  | 2.16 | 0.18 | 8  |
| 22 | W09B6.1a;W09B6.1b          | DRLPANSYPVLSK             | 18 | 1099  | 2.20 | 0.19 | 9  |
| 22 | W09B6.1a;W09B6.1b          | HQINEVEVVYESVDGHK         | 35 | 3035  | 2.20 | 0.21 | 9  |
| 22 | W09B6.1a;W09B6.1b          | HQINEVEVVYESVDGHK         | 11 | 1996  | 2.20 | 0.10 | 4  |
| 1  | W09B6.1a;W09B6.1b          | SRGGILEPNAVVGIK           | 17 | 557   | 2.61 | 0.29 | 11 |
| 7  | W09B6.1a;W09B6.1b          | CTIDHFTLTATPK             | 27 | 645   | 2.79 | 0.13 | 5  |
| 22 | W09B6.1a;W09B6.1b          | HQINEVEVVYESVDGHK         | 13 | 1910  | 2.94 | 0.18 | 6  |
| 10 | W09C2.3b;W09C2.3a;W09C2.3c | AGITVRMVTGDNIMTARAIAMSK   | 10 | 13468 | 1.75 | 0.38 | 22 |
| 1  | W09H1.5                    | VISVGSNVSSIK              | 39 | 1303  | 0.69 | 0.31 | 45 |
| 1  | W09H1.5                    | VISVGSNVSSIK              | 57 | 1670  | 0.98 | 0.12 | 12 |
| 1  | W09H1.6a;W09H1.6b          | IVLNSFSNGEWGK             | 43 | 1017  | 0.67 | 0.18 | 27 |
| 1  | W09H1.6a;W09H1.6b          | FEPGQTLIVK                | 19 | 2075  | 0.67 | 0.09 | 13 |
| 22 | W09H1.6a;W09H1.6b          | FEPGQTLIVK                | 21 | 2624  | 0.75 | 0.19 | 25 |
| 1  | W09H1.6a;W09H1.6b          | RFHVNLLRK                 | 12 | 2737  | 0.82 | 0.16 | 20 |
| 1  | W09H1.6a;W09H1.6b          | IVLNSFSNGEWGK             | 36 | 1075  | 0.85 | 0.29 | 34 |
| 10 | W09H1.6a;W09H1.6b          | IVLNSFSNGEWGK             | 88 | 2692  | 0.86 | 0.17 | 20 |
| 22 | W09H1.6a;W09H1.6b          | FEPGQTLIVK                | 26 | 2670  | 0.87 | 0.15 | 17 |
| 10 | W09H1.6a;W09H1.6b          | GSTIDESQRFTINLHSK         | 14 | 7266  | 0.91 | 0.12 | 13 |
| 1  | W09H1.6a;W09H1.6b          | GSTIDESQRFTINLHSK         | 18 | 2789  | 0.96 | 0.28 | 29 |
| 10 | W09H1.6a;W09H1.6b          | IVLNSFSNGEWGK             | 59 | 2154  | 0.96 | 0.07 | 7  |
| 1  | W09H1.6a;W09H1.6b          | GSTIDESQRFTINLHSK         | 14 | 3125  | 0.99 | 0.10 | 11 |
| 10 | W09H1.6a;W09H1.6b          | GSTIDESQRFTINLHSK         | 16 | 3008  | 1.05 | 0.17 | 16 |
| 10 | W09H1.6a;W09H1.6b          | RFHVNLLRK                 | 13 | 12015 | 1.13 | 0.30 | 27 |
| 1  | W09H1.6a;W09H1.6b          | SYPVPYRSVLQEK             | 21 | 1702  | 1.15 | 0.09 | 8  |
| 22 | W09H1.6a;W09H1.6b          | SYPVPYRSVLQEK             | 22 | 1284  | 1.15 | 0.13 | 12 |
| 1  | W09H1.6a;W09H1.6b          | IVLNSFSNGEWGK             | 28 | 639   | 1.19 | 0.29 | 25 |
| 10 | W09H1.6a;W09H1.6b          | SYPVPYRSVLQEK             | 18 | 2377  | 1.20 | 0.08 | 7  |
| 22 | W09H1.6a;W09H1.6b          | FEPGQTLIVK                | 21 | 1855  | 1.24 | 0.09 | 7  |
| 10 | W09H1.6a;W09H1.6b          | SYPVPYRSVLQEK             | 19 | 3583  | 1.28 | 0.12 | 9  |
| 1  | W09H1.6a;W09H1.6b          | IVLNSFSNGEWGK             | 22 | 861   | 1.31 | 0.26 | 19 |
| 22 | W09H1.6a;W09H1.6b          | SYPVPYRSVLQEK             | 19 | 1140  | 1.46 | 0.28 | 19 |
| 22 | W10C8.5                    | IIEDYHGFSPK               | 54 | 1721  | 0.36 | 0.13 | 36 |
| 22 | W10C8.5                    | IIEDYHGFSPK               | 50 | 5196  | 0.38 | 0.16 | 43 |
| 22 | W10C8.5                    | ARLGLSEYQAVK              | 62 | 27955 | 0.44 | 0.14 | 33 |
| 22 | W10C8.5                    | IIEDYHGFSPK               | 55 | 4142  | 0.44 | 0.30 | 68 |
| 22 | W10C8.5                    | IIEDYHGFSPK               | 85 | 63340 | 0.45 | 0.07 | 15 |
| 22 | W10C8.5                    | ARLGLSEYQAVK              | 13 | 2523  | 0.47 | 0.22 | 46 |
| 22 | W10C8.5                    | QLIADHFLFK                | 51 | 3369  | 0.49 | 0.13 | 26 |
| 22 | W10C8.5                    | ARLGLSEYQAVK              | 26 | 1663  | 0.49 | 0.15 | 30 |
| 22 | W10C8.5                    | QLIADHFLFK                | 54 | 4050  | 0.49 | 0.27 | 55 |
| 22 | W10C8.5                    | IIEDYHGFSPK               | 75 | 76577 | 0.52 | 0.09 | 17 |
| 22 | W10C8.5                    | QLIADHFLFK                | 26 | 1058  | 0.58 | 0.18 | 31 |
| 22 | W10C8.5                    | QLIADHFLFK                | 38 | 3246  | 0.58 | 0.19 | 32 |
| 22 | W10C8.5                    | LIEMEEK                   | 10 | 602   | 0.59 | 0.16 | 28 |
| 22 | W10C8.5                    | LNLQVRGIHGEHSESVGGVYDISNK | 21 | 7344  | 0.61 | 0.16 | 26 |
| 22 | W10C8.5                    | ARLGLSEYQAVK              | 32 | 2216  | 0.61 | 0.14 | 23 |
| 22 | W10C8.5                    | QLIADHFLFK                | 38 | 1040  | 0.61 | 0.11 | 17 |
| 22 | W10C8.5                    | IIEDYHGFSPK               | 31 | 1508  | 0.62 | 0.18 | 30 |
| 22 | W10C8.5                    | EFPPDPK                   | 44 | 5668  | 0.67 | 0.14 | 21 |
| 22 | W10C8.5                    | QLIADHFLFK                | 37 | 1718  | 0.67 | 0.11 | 17 |
| 22 | W10C8.5                    | QLIADHFLFK                | 35 | 3049  | 0.67 | 0.12 | 18 |
| 22 | W10C8.5                    | QLIADHFLFK                | 71 | 36313 | 0.68 | 0.10 | 15 |
| 22 | W10C8.5                    | QLIADHFLFK                | 12 | 554   | 0.69 | 0.14 | 21 |
| 22 | W10C8.5                    | EFPPDPK                   | 19 | 13711 | 0.70 | 0.10 | 14 |
| 22 | W10C8.5                    | LNLQVRGIHGEHSESVGGVYDISNK | 12 | 17636 | 0.70 | 0.11 | 16 |
| 22 | W10C8.5                    | QLIADHFLFK                | 39 | 2832  | 0.72 | 0.10 | 15 |
| 22 | W10C8.5                    | LNLQVRGIHGEHSESVGGVYDISNK | 17 | 15512 | 0.77 | 0.21 | 28 |
| 22 | W10C8.5                    | QLIADHFLFK                | 72 | 26300 | 0.82 | 0.09 | 11 |
| 22 | W10C8.5                    | LNLQVRGIHGEHSESVGGVYDISNK | 18 | 8808  | 0.97 | 0.18 | 19 |
| 22 | W10C8.5                    | AFSEYSDK                  | 21 | 7356  | 1.00 | 0.17 | 18 |
| 22 | W10C8.5                    | YPLDGMGK                  | 10 | 7799  | 1.13 | 0.11 | 9  |
| 22 | W10C8.5                    | EFPPDPK                   | 13 | 1554  | 1.18 | 0.21 | 17 |
| 22 | W10C8.5                    | QPPVDLGEK                 | 12 | 28406 | 1.36 | 0.13 | 10 |
| 22 | W10C8.5                    | ARLGLSEYQAVK              | 25 | 2484  | 1.51 | 0.16 | 10 |
| 22 | W10C8.5                    | LNLQVRGIHGEHSESVGGVYDISNK | 17 | 4218  | 1.63 | 0.06 | 4  |

|                            |                           |    |       |      |      |    |
|----------------------------|---------------------------|----|-------|------|------|----|
| 22 W10C8.5                 | IIEDYHGFSPK               | 56 | 10046 | 1.67 | 0.11 | 7  |
| 22 W10C8.5                 | IIEDYHGFSPK               | 82 | 16109 | 1.68 | 0.09 | 5  |
| 22 W10C8.5                 | QLIADHFLFK                | 52 | 4908  | 1.91 | 0.16 | 8  |
| 22 W10C8.5                 | QPPVDLGEGK                | 15 | 23441 | 1.95 | 0.16 | 8  |
| 22 W10C8.5                 | QLIADHFLFK                | 60 | 4507  | 2.20 | 0.12 | 6  |
| 22 W10C8.5                 | ARLGLSEYQAVK              | 59 | 6904  | 2.76 | 0.16 | 6  |
| 22 W10C8.5                 | ARLGLSEYQAVK              | 52 | 10797 | 3.18 | 0.10 | 3  |
| 10 W10C8.5;F32B5.1         | QLIADHFLFK                | 34 | 2000  | 0.34 | 0.20 | 59 |
| 7 W10C8.5;F32B5.1          | EFPPLPDPK                 | 32 | 11228 | 0.40 | 0.12 | 30 |
| 7 W10C8.5;F32B5.1          | EFPPLPDPK                 | 18 | 14083 | 0.46 | 0.18 | 40 |
| 10 W10C8.5;F32B5.1         | EFPPLPDPK                 | 34 | 15291 | 0.46 | 0.08 | 17 |
| 10 W10C8.5;F32B5.1         | EFPPLPDPK                 | 44 | 17195 | 0.46 | 0.08 | 17 |
| 10 W10C8.5;F32B5.1         | EFPPLPDPK                 | 22 | 2949  | 0.46 | 0.16 | 35 |
| 7 W10C8.5;F32B5.1          | QLIADHFLFK                | 53 | 3226  | 0.51 | 0.14 | 27 |
| 7 W10C8.5;F32B5.1          | QLIADHFLFK                | 51 | 3344  | 0.55 | 0.12 | 22 |
| 7 W10C8.5;F32B5.1          | EFPPLPDPK                 | 17 | 4005  | 0.56 | 0.21 | 38 |
| 7 W10C8.5;F32B5.1          | ARLGLSEYQAVK              | 48 | 16755 | 0.58 | 0.12 | 21 |
| 7 W10C8.5;F32B5.1          | ARLGLSEYQAVK              | 74 | 17934 | 0.59 | 0.15 | 25 |
| 7 W10C8.5;F32B5.1          | EFPPLPDPK                 | 24 | 12372 | 0.59 | 0.20 | 34 |
| 7 W10C8.5;F32B5.1          | EFPPLPDPK                 | 21 | 2647  | 0.60 | 0.42 | 71 |
| 7 W10C8.5;F32B5.1          | EFPPLPDPK                 | 23 | 2904  | 0.63 | 0.25 | 40 |
| 7 W10C8.5;F32B5.1          | QLIADHFLFK                | 53 | 61704 | 0.63 | 0.05 | 9  |
| 10 W10C8.5;F32B5.1         | YYPLDGMGK                 | 18 | 6039  | 0.64 | 0.16 | 24 |
| 10 W10C8.5;F32B5.1         | EFPPLPDPK                 | 19 | 3532  | 0.65 | 0.11 | 16 |
| 7 W10C8.5;F32B5.1          | LNLQVRGIHGEHSESVGGVYDISNK | 18 | 4030  | 0.66 | 0.24 | 36 |
| 10 W10C8.5;F32B5.1         | IIEDYHGFSPK               | 18 | 1556  | 0.67 | 0.14 | 22 |
| 7 W10C8.5;F32B5.1          | QLIADHFLFK                | 62 | 70964 | 0.67 | 0.13 | 20 |
| 10 W10C8.5;F32B5.1         | ARLGLSEYQAVK              | 59 | 19744 | 0.68 | 0.11 | 16 |
| 7 W10C8.5;F32B5.1          | YYPLDGMGK                 | 14 | 5510  | 0.68 | 0.25 | 37 |
| 10 W10C8.5;F32B5.1         | IIEDYHGFSPK               | 79 | 91299 | 0.70 | 0.08 | 11 |
| 10 W10C8.5;F32B5.1         | ARLGLSEYQAVK              | 61 | 27460 | 0.70 | 0.10 | 15 |
| 10 W10C8.5;F32B5.1         | IIEDYHGFSPK               | 77 | 95724 | 0.74 | 0.16 | 21 |
| 7 W10C8.5;F32B5.1          | ARLGLSEYQAVK              | 45 | 2355  | 0.75 | 0.17 | 23 |
| 10 W10C8.5;F32B5.1         | EFPPLPDPK                 | 15 | 9925  | 0.76 | 0.18 | 24 |
| 10 W10C8.5;F32B5.1         | QLIADHFLFK                | 16 | 1299  | 0.77 | 0.10 | 13 |
| 10 W10C8.5;F32B5.1         | QLIADHFLFK                | 41 | 2505  | 0.78 | 0.19 | 24 |
| 10 W10C8.5;F32B5.1         | YYPLDGMGK                 | 28 | 6203  | 0.79 | 0.15 | 20 |
| 7 W10C8.5;F32B5.1          | QLIADHFLFK                | 51 | 2346  | 0.81 | 0.18 | 22 |
| 10 W10C8.5;F32B5.1         | YYPLDGMGK                 | 19 | 12905 | 0.81 | 0.28 | 34 |
| 7 W10C8.5;F32B5.1          | QLIADHFLFK                | 17 | 1183  | 0.82 | 0.12 | 15 |
| 7 W10C8.5;F32B5.1          | QLIADHFLFK                | 34 | 1643  | 0.82 | 0.12 | 15 |
| 7 W10C8.5;F32B5.1          | YYPLDGMGK                 | 19 | 4615  | 0.82 | 0.16 | 20 |
| 10 W10C8.5;F32B5.1         | QLIADHFLFK                | 65 | 41895 | 0.85 | 0.10 | 11 |
| 7 W10C8.5;F32B5.1          | QLIADHFLFK                | 35 | 2446  | 0.88 | 0.14 | 16 |
| 10 W10C8.5;F32B5.1         | EFPPLPDPK                 | 44 | 7418  | 0.91 | 0.13 | 14 |
| 7 W10C8.5;F32B5.1          | QLIADHFLFK                | 47 | 1904  | 0.92 | 0.08 | 9  |
| 10 W10C8.5;F32B5.1         | QLIADHFLFK                | 61 | 36002 | 0.93 | 0.07 | 8  |
| 10 W10C8.5;F32B5.1         | QPPVDLGEGK                | 11 | 7967  | 0.95 | 0.04 | 4  |
| 7 W10C8.5;F32B5.1          | QLIADHFLFK                | 38 | 2247  | 0.97 | 0.15 | 16 |
| 7 W10C8.5;F32B5.1          | YYPLDGMGK                 | 25 | 8196  | 1.00 | 0.25 | 25 |
| 7 W10C8.5;F32B5.1          | ARLGLSEYQAVK              | 47 | 2500  | 1.00 | 0.12 | 12 |
| 10 W10C8.5;F32B5.1         | QLIADHFLFK                | 34 | 2792  | 1.02 | 0.10 | 10 |
| 10 W10C8.5;F32B5.1         | EFPPLPDPK                 | 44 | 7158  | 1.03 | 0.29 | 28 |
| 7 W10C8.5;F32B5.1          | ARLGLSEYQAVK              | 16 | 3409  | 1.07 | 0.21 | 19 |
| 10 W10C8.5;F32B5.1         | QLIADHFLFK                | 21 | 1423  | 1.11 | 0.16 | 15 |
| 7 W10C8.5;F32B5.1          | IIEDYHGFSPK               | 18 | 1221  | 1.12 | 0.26 | 23 |
| 10 W10C8.5;F32B5.1         | QLIADHFLFK                | 44 | 3322  | 1.12 | 0.11 | 10 |
| 10 W10C8.5;F32B5.1         | QLIADHFLFK                | 42 | 1318  | 1.13 | 0.15 | 14 |
| 7 W10C8.5;F32B5.1          | IIEDYHGFSPK               | 77 | 7394  | 1.18 | 0.10 | 9  |
| 10 W10C8.5;F32B5.1         | QLIADHFLFK                | 54 | 3469  | 1.21 | 0.12 | 10 |
| 7 W10C8.5;F32B5.1          | GRGIFHNNDK                | 16 | 39912 | 1.22 | 0.10 | 9  |
| 7 W10C8.5;F32B5.1          | QLIADHFLFK                | 70 | 5603  | 1.22 | 0.09 | 8  |
| 10 W10C8.5;F32B5.1         | QLIADHFLFK                | 48 | 1650  | 1.23 | 0.13 | 10 |
| 10 W10C8.5;F32B5.1         | YYPLDGMGK                 | 19 | 7018  | 1.25 | 0.17 | 13 |
| 10 W10C8.5;F32B5.1         | QLIADHFLFK                | 42 | 2663  | 1.25 | 0.16 | 13 |
| 7 W10C8.5;F32B5.1          | IIEDYHGFSPK               | 75 | 11064 | 1.26 | 0.14 | 11 |
| 10 W10C8.5;F32B5.1         | YYPLDGMGK                 | 19 | 9734  | 1.28 | 0.20 | 16 |
| 10 W10C8.5;F32B5.1         | EFPPLPDPK                 | 16 | 10705 | 1.29 | 0.16 | 12 |
| 7 W10C8.5;F32B5.1          | QLIADHFLFK                | 50 | 3706  | 1.38 | 0.08 | 6  |
| 10 W10C8.5;F32B5.1         | QLIADHFLFK                | 58 | 2622  | 1.47 | 0.10 | 7  |
| 7 W10C8.5;F32B5.1          | GRGIFHNNDK                | 10 | 9611  | 2.01 | 0.04 | 2  |
| 7 W10C8.5;F32B5.1          | ARLGLSEYQAVK              | 44 | 3260  | 2.03 | 0.07 | 3  |
| 10 W10C8.5;F32B5.1         | IIEDYHGFSPK               | 81 | 13161 | 2.06 | 0.06 | 3  |
| 7 W10C8.5;F32B5.1          | ARLGLSEYQAVK              | 64 | 5402  | 2.08 | 0.13 | 6  |
| 10 W10C8.5;F32B5.1         | IIEDYHGFSPK               | 63 | 6576  | 2.13 | 0.11 | 5  |
| 7 W10C8.5;F32B5.1          | QLIADHFLFK                | 20 | 1381  | 2.52 | 0.14 | 6  |
| 10 W10C8.5;F32B5.1         | QLIADHFLFK                | 56 | 4136  | 2.57 | 0.07 | 3  |
| 10 W10C8.5;F32B5.1         | QLIADHFLFK                | 49 | 2183  | 2.76 | 0.11 | 4  |
| 10 W10C8.5;F32B5.1         | ARLGLSEYQAVK              | 41 | 5954  | 2.79 | 0.08 | 3  |
| 10 W10C8.5;F32B5.1         | ARLGLSEYQAVK              | 38 | 3891  | 3.70 | 0.12 | 3  |
| 22 Y102A5A.1               | QYLLLHALK                 | 27 | 1768  | 0.19 | 0.17 | 90 |
| 7 Y102A5A.1                | QYLLLHALK                 | 17 | 540   | 0.33 | 0.16 | 48 |
| 7 Y102A5A.1                | QYLLLHALK                 | 20 | 688   | 0.56 | 0.23 | 41 |
| 7 Y102A5A.1                | QYLLLHALK                 | 13 | 1717  | 0.70 | 0.08 | 11 |
| 7 Y102A5A.1                | QYLLLHALK                 | 30 | 1582  | 0.71 | 0.13 | 18 |
| 1 Y102A5A.1                | QYLLLHALK                 | 12 | 907   | 0.83 | 0.06 | 7  |
| 1 Y102A5A.1                | QYLLLHALK                 | 17 | 1021  | 0.83 | 0.08 | 9  |
| 22 Y102A5A.1               | QYLLLHALK                 | 24 | 997   | 5.32 | 0.07 | 1  |
| 22 Y102A5A.1               | QYLLLHALK                 | 36 | 2022  | 7.84 | 0.17 | 2  |
| 10 Y102A5A.1;F13E9.14      | VIRALIK                   | 11 | 1506  | 0.78 | 0.22 | 28 |
| 10 Y102A5A.1;F13E9.14      | QYLLLHALK                 | 39 | 2018  | 0.80 | 0.08 | 10 |
| 10 Y102A5A.1;F13E9.14      | AEQSRDIHSLTLK             | 11 | 3844  | 0.94 | 0.14 | 15 |
| 10 Y102A5A.1;F13E9.14      | HQVDEGLDLRK               | 12 | 8175  | 1.78 | 0.11 | 6  |
| 10 Y102A5A.1;F13E9.14      | HQVDEGLDLRK               | 11 | 7328  | 1.86 | 0.15 | 8  |
| 10 Y102A5A.1;F13E9.14      | QYLLLHALK                 | 17 | 1093  | 1.87 | 0.15 | 8  |
| 10 Y102A5A.1;F13E9.14      | QYLLLHALK                 | 25 | 1374  | 1.97 | 0.28 | 14 |
| 10 Y105C5B.28a;Y105C5B.28b | DNERRLTGLHETASIDK         | 15 | 15377 | 0.73 | 0.25 | 33 |
| 10 Y105C5B.28a;Y105C5B.28b | DNERRLTGLHETASIDK         | 10 | 14223 | 0.85 | 0.09 | 11 |
| 10 Y105C5B.28a;Y105C5B.28b | LSLVHPQHIAYYDPHGGK        | 13 | 18080 | 0.90 | 0.19 | 21 |
| 10 Y105C5B.28a;Y105C5B.28b | DNERRLTGLHETASIDK         | 15 | 18681 | 1.48 | 0.20 | 13 |
| 10 Y105C5B.28a;Y105C5B.28b | DNERRLTGLHETASIDK         | 17 | 20367 | 1.48 | 0.33 | 22 |

|                                                |                       |     |       |      |      |      |
|------------------------------------------------|-----------------------|-----|-------|------|------|------|
| 10 Y105C5B.28a;Y105C5B.28b                     | MRNPPGGIDEIMSAINK     | 36  | 3879  | 2.26 | 0.13 | 6    |
| 22 Y105C5B.28b                                 | DNERRLTGLHETASIDK     | 16  | 12393 | 0.69 | 0.27 | 38   |
| 22 Y105C5B.28b                                 | LSLVHPQHIAYYDPHGGK    | 17  | 15665 | 0.71 | 0.26 | 37   |
| 1 Y105C5B.28b                                  | DNERRLTGLHETASIDK     | 13  | 7615  | 0.71 | 0.08 | 11   |
| 22 Y105C5B.28b                                 | LSLVHPQHIAYYDPHGGK    | 24  | 10534 | 0.85 | 0.21 | 25   |
| 22 Y105C5B.28b                                 | DNERRLTGLHETASIDK     | 13  | 19846 | 0.99 | 0.19 | 19   |
| 22 Y105C5B.28b                                 | DNERRLTGLHETASIDK     | 13  | 4437  | 1.04 | 0.22 | 21   |
| 1 Y105C5B.28b                                  | MRNPPGGIDEIMSAINK     | 16  | 2548  | 1.10 | 0.12 | 11   |
| 1 Y105C5B.28b                                  | MRNPPGGIDEIMSAINK     | 30  | 2949  | 1.17 | 0.18 | 16   |
| 1 Y105C5B.28b                                  | MRNPPGGIDEIMSAINK     | 19  | 3191  | 1.20 | 0.17 | 14   |
| 1 Y105C5B.28b                                  | MRNPPGGIDEIMSAINK     | 14  | 4400  | 1.23 | 0.14 | 12   |
| 22 Y105C5B.28b                                 | LSLVHPQHIAYYDPHGGK    | 12  | 10818 | 1.31 | 0.30 | 23   |
| 22 Y105C5B.28b                                 | MRNPPGGIDEIMSAINK     | 12  | 3044  | 1.33 | 0.14 | 10   |
| 1 Y105C5B.28b                                  | MRNPPGGIDEIMSAINK     | 32  | 4013  | 1.35 | 0.12 | 9    |
| 22 Y105C5B.28b                                 | MRNPPGGIDEIMSAINK     | 42  | 5448  | 1.43 | 0.12 | 9    |
| 22 Y105C5B.28b                                 | TRTFDFEPTDPEK         | 18  | 9989  | 1.53 | 0.09 | 6    |
| 22 Y105C5B.28b                                 | MRNPPGGIDEIMSAINK     | 17  | 3025  | 1.53 | 0.15 | 10   |
| 22 Y105C5B.28b                                 | TRTFDFEPTDPEK         | 14  | 9607  | 1.63 | 0.14 | 9    |
| 1 Y105C5B.28b                                  | MRNPPGGIDEIMSAINK     | 36  | 3770  | 1.72 | 0.07 | 4    |
| 22 Y105C5B.28b                                 | LSLVHPQHIAYYDPHGGK    | 17  | 8170  | 1.75 | 0.34 | 20   |
| 7 Y105C5B.28b;Y105C5B.28a                      | MRNPPGGIDEIMSAINK     | 16  | 4560  | 1.55 | 0.17 | 11   |
| 7 Y105C5B.28b;Y105C5B.28a                      | MRNPPGGIDEIMSAINK     | 25  | 6050  | 2.13 | 0.19 | 9    |
| 10 Y105C5B.9                                   | IVNDMDLAEHPK          | 21  | 1511  | 0.48 | 0.27 | 56   |
| 10 Y105C5B.9                                   | IGHGLHFLDPTFEK        | 13  | 5638  | 0.83 | 0.10 | 12   |
| 22 Y105C5B.9                                   | IVNDMDLAEHPK          | 27  | 1003  | 1.13 | 0.07 | 6    |
| 10 Y105E8A.19                                  | GRFHLGFIAPLLK         | 28  | 5860  | 0.63 | 0.25 | 40   |
| 10 Y105E8A.19                                  | IFILAEELPK            | 50  | 960   | 0.80 | 0.14 | 17   |
| 10 Y105E8A.19                                  | IADFLQAGLK            | 57  | 1184  | 0.83 | 0.11 | 13   |
| 1 Y105E8A.19                                   | IFILAEELPK            | 55  | 914   | 0.89 | 0.12 | 14   |
| 1 Y105E8A.19                                   | IFILAEELPK            | 57  | 964   | 0.92 | 0.19 | 21   |
| 7 Y105E8A.19                                   | IADFLQAGLK            | 11  | 336   | 0.97 | 0.31 | 32   |
| 22 Y105E8A.19                                  | GRFHLGFIAPLLK         | 25  | 4714  | 1.01 | 0.17 | 17   |
| 10 Y105E8A.19                                  | IADFLQAGLK            | 53  | 1147  | 1.08 | 0.16 | 15   |
| 22 Y105E8A.19                                  | IADFLQAGLK            | 22  | 495   | 1.09 | 0.39 | 36   |
| 10 Y105E8A.19                                  | IADFLQAGLK            | 41  | 596   | 1.10 | 0.15 | 13   |
| 22 Y105E8A.19                                  | IADFLQAGLK            | 50  | 918   | 1.11 | 0.13 | 11   |
| 10 Y105E8A.19                                  | IFILAEELPK            | 56  | 1814  | 1.14 | 0.11 | 10   |
| 22 Y105E8A.19                                  | GRFHLGFIAPLLK         | 15  | 4105  | 1.15 | 0.23 | 20   |
| 10 Y105E8A.19                                  | IADFLQAGLK            | 25  | 776   | 1.18 | 0.12 | 11   |
| 10 Y105E8A.19                                  | IADFLQAGLK            | 12  | 274   | 1.22 | 0.19 | 16   |
| 10 Y105E8A.19                                  | IFILAEELPK            | 73  | 1699  | 1.27 | 0.15 | 12   |
| 10 Y105E8A.19                                  | IFILAEELPK            | 42  | 1269  | 1.28 | 0.13 | 10   |
| 10 Y105E8A.19                                  | LVTDAFSTK             | 17  | 743   | 1.42 | 0.11 | 8    |
| 10 Y105E8A.19                                  | IFILAEELPK            | 49  | 1254  | 1.43 | 0.07 | 5    |
| 10 Y105E8A.22                                  | EFNVPLFEK             | 17  | 1652  | 0.58 | 0.11 | 19   |
| 22 Y105E8A.22                                  | EFNVPLFEK             | 11  | 1033  | 0.75 | 0.13 | 17   |
| 22 Y105E8A.4                                   | DQSYHVIVLTGSEK        | 41  | 3332  | 1.55 | 0.09 | 6    |
| 7 Y105E8B.1a;Y105E8B.1d;Y105E8B.1b             | EVDRLDELVHEK          | 41  | 7641  | 0.82 | 0.09 | 11   |
| 7 Y105E8B.1a;Y105E8B.1d;Y105E8B.1b             | EVDRLDELVHEK          | 31  | 9459  | 0.89 | 0.11 | 12   |
| 7 Y105E8B.1a;Y105E8B.1d;Y105E8B.1b             | EVDRLDELVHEK          | 36  | 3789  | 1.04 | 0.11 | 10   |
| 7 Y105E8B.1a;Y105E8B.1d;Y105E8B.1b             | EVDRLDELVHEK          | 34  | 3279  | 1.12 | 0.11 | 10   |
| 22 Y105E8B.1a;Y105E8B.1d;Y105E8B.1b;Y105E8B.1f | DNALDRADAAEEK         | 38  | 8770  | 0.44 | 0.18 | 40   |
| 22 Y105E8B.1a;Y105E8B.1d;Y105E8B.1b;Y105E8B.1f | DNALDRADAAEEK         | 34  | 10531 | 0.48 | 0.12 | 24   |
| 22 Y105E8B.1a;Y105E8B.1d;Y105E8B.1b;Y105E8B.1f | EVDRLDELVHEK          | 38  | 2320  | 0.65 | 0.20 | 31   |
| 22 Y105E8B.1a;Y105E8B.1d;Y105E8B.1b;Y105E8B.1f | EVDRLDELVHEK          | 39  | 2797  | 0.68 | 0.13 | 19   |
| 22 Y105E8B.1a;Y105E8B.1d;Y105E8B.1b;Y105E8B.1f | EAQLLAEEADRK          | 90  | 9140  | 0.84 | 0.07 | 9    |
| 22 Y105E8B.1a;Y105E8B.1d;Y105E8B.1b;Y105E8B.1f | EVDRLDELVHEK          | 28  | 11624 | 0.93 | 0.10 | 10   |
| 22 Y105E8B.1a;Y105E8B.1d;Y105E8B.1b;Y105E8B.1f | EVDRLDELVHEK          | 24  | 8238  | 0.93 | 0.06 | 7    |
| 22 Y105E8B.1a;Y105E8B.1d;Y105E8B.1b;Y105E8B.1f | EAETRAEFAERSVQK       | 16  | 11465 | 0.95 | 0.04 | 5    |
| 22 Y105E8B.1a;Y105E8B.1d;Y105E8B.1b;Y105E8B.1f | EAQLLAEEADRK          | 73  | 9258  | 0.99 | 0.10 | 10   |
| 22 Y105E8B.1a;Y105E8B.1d;Y105E8B.1b;Y105E8B.1f | VMENRSLQDEERANTVEAQLK | 11  | 19208 | 1.37 | 0.14 | 10   |
| 10 Y105E8B.1a;Y105E8B.1f                       | DNALDRADAAEEK         | 38  | 7065  | 0.03 | 0.60 | 2065 |
| 10 Y105E8B.1a;Y105E8B.1f                       | EAQLLAEEADRK          | 71  | 6328  | 0.25 | 0.37 | 148  |
| 10 Y105E8B.1a;Y105E8B.1f                       | EAQLLAEEADRK          | 74  | 6969  | 0.36 | 0.23 | 65   |
| 10 Y105E8B.1a;Y105E8B.1f                       | EVDRLDELVHEK          | 41  | 8330  | 0.48 | 0.15 | 31   |
| 10 Y105E8B.1a;Y105E8B.1f                       | EVDRLDELVHEK          | 32  | 5707  | 0.52 | 0.11 | 22   |
| 10 Y105E8B.1a;Y105E8B.1f                       | LERVEELRDTQK          | 15  | 6924  | 0.55 | 0.16 | 29   |
| 1 Y105E8B.1a;Y105E8B.1f                        | EVDRLDELVHEK          | 26  | 3547  | 0.74 | 0.15 | 20   |
| 1 Y105E8B.1a;Y105E8B.1f                        | EVDRLDELVHEK          | 18  | 3431  | 0.74 | 0.10 | 14   |
| 10 Y105E8B.1a;Y105E8B.1f                       | EVDRLDELVHEK          | 18  | 5994  | 0.82 | 0.11 | 14   |
| 10 Y105E8B.1a;Y105E8B.1f                       | EVDRLDELVHEK          | 33  | 5553  | 0.83 | 0.12 | 14   |
| 1 Y105E8B.1a;Y105E8B.1f                        | EVDRLDELVHEK          | 42  | 6807  | 1.31 | 0.10 | 7    |
| 10 Y105E8B.5                                   | SVLVVDDISDTGRTLAK     | 45  | 5539  | 0.20 | 0.49 | 245  |
| 1 Y105E8B.5                                    | LLSTLHETGVEK          | 71  | 4756  | 0.29 | 0.09 | 30   |
| 10 Y105E8B.5                                   | LLSTLHETGVEK          | 64  | 2737  | 0.33 | 0.29 | 90   |
| 10 Y105E8B.5                                   | LLSTLHETGVEK          | 53  | 5048  | 0.34 | 0.17 | 49   |
| 1 Y105E8B.5                                    | LLSTLHETGVEK          | 61  | 5006  | 0.36 | 0.15 | 42   |
| 10 Y105E8B.5                                   | SVLVVDDISDTGRTLAK     | 54  | 5444  | 0.38 | 0.58 | 154  |
| 22 Y105E8B.5                                   | LLSTLHETGVEK          | 61  | 9328  | 0.46 | 0.10 | 21   |
| 10 Y105E8B.5                                   | RVVDVPEDFVAFEIPDK     | 30  | 3487  | 0.47 | 0.35 | 74   |
| 22 Y105E8B.5                                   | LLSTLHETGVEK          | 56  | 12710 | 0.48 | 0.09 | 18   |
| 7 Y105E8B.5                                    | SVLVVDDISDTGRTLAK     | 35  | 2908  | 0.48 | 0.20 | 42   |
| 1 Y105E8B.5                                    | LLSTLHETGVEK          | 58  | 4025  | 0.52 | 0.21 | 40   |
| 22 Y105E8B.5                                   | FIVGYGLDYNQK          | 110 | 6164  | 0.52 | 0.11 | 22   |
| 22 Y105E8B.5                                   | FIVGYGLDYNQK          | 97  | 4872  | 0.53 | 0.07 | 13   |
| 1 Y105E8B.5                                    | TWTALLSK              | 16  | 259   | 0.53 | 0.41 | 76   |
| 1 Y105E8B.5                                    | SVLVVDDISDTGRTLAK     | 16  | 2528  | 0.55 | 0.11 | 19   |
| 10 Y105E8B.5                                   | LLSTLHETGVEK          | 46  | 5231  | 0.55 | 0.18 | 33   |
| 1 Y105E8B.5                                    | LLSTLHETGVEK          | 51  | 2751  | 0.59 | 0.11 | 19   |
| 1 Y105E8B.5                                    | LLSTLHETGVEK          | 16  | 1677  | 0.59 | 0.30 | 52   |
| 1 Y105E8B.5                                    | LLSTLHETGVEK          | 46  | 3853  | 0.59 | 0.14 | 24   |
| 1 Y105E8B.5                                    | FIVGYGLDYNQK          | 66  | 1182  | 0.59 | 0.16 | 26   |
| 7 Y105E8B.5                                    | RVVDVPEDFVAFEIPDK     | 70  | 3177  | 0.70 | 0.14 | 21   |
| 7 Y105E8B.5                                    | RVVDVPEDFVAFEIPDK     | 60  | 2619  | 0.72 | 0.15 | 21   |
| 10 Y105E8B.5                                   | SVLVVDDISDTGRTLAK     | 43  | 3312  | 0.73 | 0.15 | 21   |
| 1 Y105E8B.5                                    | SVLVVDDISDTGRTLAK     | 13  | 2331  | 0.74 | 0.08 | 11   |
| 22 Y105E8B.5                                   | RVVDVPEDFVAFEIPDK     | 88  | 4275  | 0.77 | 0.11 | 15   |
| 1 Y105E8B.5                                    | TWTALLSK              | 53  | 1714  | 0.77 | 0.05 | 6    |
| 7 Y105E8B.5                                    | RVVDVPEDFVAFEIPDK     | 28  | 5855  | 0.79 | 0.12 | 16   |
| 10 Y105E8B.5                                   | FIVGYGLDYNQK          | 108 | 5187  | 0.80 | 0.08 | 10   |
| 7 Y105E8B.5                                    | LLSTLHETGVEK          | 60  | 8911  | 0.89 | 0.08 | 9    |

|                                     |                     |     |       |      |      |     |
|-------------------------------------|---------------------|-----|-------|------|------|-----|
| 7 Y105E8B.5                         | FIVGYGLDYNQK        | 107 | 5315  | 0.92 | 0.12 | 13  |
| 22 Y105E8B.5                        | LLSTLHETGVEK        | 28  | 1457  | 0.95 | 0.22 | 23  |
| 22 Y105E8B.5                        | RVVDVPEDFVAFEIPDK   | 93  | 4778  | 0.96 | 0.11 | 11  |
| 1 Y105E8B.5                         | FIVGYGLDYNQK        | 46  | 914   | 0.98 | 0.22 | 22  |
| 7 Y105E8B.5                         | FIVGYGLDYNQK        | 99  | 4556  | 0.99 | 0.12 | 12  |
| 10 Y105E8B.5                        | FIVGYGLDYNQK        | 66  | 3300  | 0.99 | 0.14 | 14  |
| 7 Y105E8B.5                         | RVVDVPEDFVAFEIPDK   | 55  | 6332  | 1.03 | 0.21 | 20  |
| 7 Y105E8B.5                         | TWTALLLSK           | 42  | 2408  | 1.11 | 0.12 | 11  |
| 22 Y105E8B.5                        | RVVDVPEDFVAFEIPDK   | 31  | 5582  | 1.13 | 0.09 | 8   |
| 22 Y105E8B.5                        | FIVGYGLDYNQK        | 71  | 3906  | 1.15 | 0.09 | 7   |
| 22 Y105E8B.5                        | FIVGYGLDYNQK        | 61  | 1846  | 1.17 | 0.17 | 14  |
| 22 Y105E8B.5                        | SVLVVDDISDTGRTLAK   | 63  | 28396 | 1.19 | 0.16 | 14  |
| 10 Y105E8B.5                        | RVVDVPEDFVAFEIPDK   | 19  | 2791  | 1.20 | 0.07 | 5   |
| 22 Y105E8B.5                        | RVVDVPEDFVAFEIPDK   | 38  | 4196  | 1.24 | 0.15 | 12  |
| 1 Y105E8B.5                         | FIVGYGLDYNQK        | 99  | 1824  | 1.25 | 0.12 | 10  |
| 22 Y105E8B.5                        | SVLVVDDISDTGRTLAK   | 15  | 2463  | 1.26 | 0.09 | 7   |
| 10 Y105E8B.5                        | RVVDVPEDFVAFEIPDK   | 79  | 3456  | 1.26 | 0.14 | 11  |
| 1 Y105E8B.5                         | TWTALLLSK           | 64  | 2198  | 1.28 | 0.17 | 13  |
| 10 Y105E8B.5                        | RVVDVPEDFVAFEIPDK   | 86  | 2854  | 1.31 | 0.17 | 13  |
| 1 Y105E8B.5                         | RVVDVPEDFVAFEIPDK   | 63  | 1401  | 1.31 | 0.13 | 10  |
| 22 Y105E8B.5                        | LLSTLHETGVEK        | 43  | 2879  | 1.32 | 0.15 | 12  |
| 22 Y105E8B.5                        | LLSTLHETGVEK        | 61  | 8194  | 1.32 | 0.14 | 11  |
| 22 Y105E8B.5                        | FIVGYGLDYNQK        | 67  | 3225  | 1.33 | 0.07 | 5   |
| 22 Y105E8B.5                        | SVLVVDDISDTGRTLAK   | 57  | 21229 | 1.40 | 0.11 | 8   |
| 1 Y105E8B.5                         | RVVDVPEDFVAFEIPDK   | 63  | 1569  | 1.43 | 0.18 | 13  |
| 22 Y105E8B.5                        | RVVDVPEDFVAFEIPDK   | 23  | 2417  | 1.43 | 0.18 | 13  |
| 22 Y105E8B.5                        | LLSTLHETGVEK        | 52  | 4689  | 1.47 | 0.17 | 12  |
| 1 Y105E8B.5                         | RVVDVPEDFVAFEIPDK   | 40  | 2938  | 1.53 | 0.17 | 11  |
| 22 Y105E8B.5                        | LLSTLHETGVEK        | 46  | 2726  | 1.55 | 0.12 | 8   |
| 22 Y105E8B.5                        | LLSTLHETGVEK        | 44  | 4547  | 1.59 | 0.17 | 11  |
| 1 Y105E8B.5                         | RVVDVPEDFVAFEIPDK   | 15  | 1536  | 1.60 | 0.16 | 10  |
| 7 Y105E8B.5                         | SVLVVDDISDTGRTLAK   | 46  | 4793  | 1.63 | 0.09 | 5   |
| 10 Y105E8B.5                        | RVVDVPEDFVAFEIPDK   | 32  | 4342  | 1.71 | 0.16 | 9   |
| 22 Y105E8B.5                        | FIVGYGLDYNQK        | 45  | 1978  | 1.74 | 0.14 | 8   |
| 7 Y105E8B.5                         | SVLVVDDISDTGRTLAK   | 34  | 1737  | 1.78 | 0.14 | 8   |
| 1 Y105E8B.5                         | LLSTLHETGVEK        | 51  | 2125  | 1.80 | 0.20 | 11  |
| 10 Y105E8B.5                        | LLSTLHETGVEK        | 59  | 9880  | 1.80 | 0.20 | 11  |
| 7 Y105E8B.5                         | SVLVVDDISDTGRTLAK   | 51  | 3359  | 1.83 | 0.11 | 6   |
| 1 Y105E8B.5                         | FIVGYGLDYNQK        | 71  | 2040  | 1.87 | 0.11 | 6   |
| 10 Y105E8B.5                        | SVLVVDDISDTGRTLAK   | 36  | 20404 | 1.88 | 0.08 | 4   |
| 22 Y105E8B.5                        | TWTALLLSK           | 28  | 1721  | 1.89 | 0.05 | 3   |
| 10 Y105E8B.5                        | LLSTLHETGVEK        | 54  | 6731  | 1.98 | 0.09 | 5   |
| 10 Y105E8B.5                        | SVLVVDDISDTGRTLAK   | 51  | 12277 | 2.07 | 0.06 | 3   |
| 1 Y105E8B.5                         | LLSTLHETGVEK        | 45  | 3074  | 2.12 | 0.09 | 4   |
| 7 Y105E8B.5                         | TWTALLLSK           | 25  | 979   | 2.54 | 0.11 | 4   |
| 1 Y105E8B.5                         | SVLVVDDISDTGRTLAK   | 42  | 3834  | 2.74 | 0.16 | 6   |
| 1 Y105E8B.5                         | SVLVVDDISDTGRTLAK   | 50  | 2674  | 3.75 | 0.11 | 3   |
| 7 Y106G6H.2a;Y106G6H.2b;Y106G6H.2c  | QFTNVYVK            | 35  | 1486  | 0.15 | 0.42 | 278 |
| 22 Y106G6H.2a;Y106G6H.2b;Y106G6H.2c | YQGVNLYVK           | 37  | 7361  | 0.28 | 0.07 | 26  |
| 10 Y106G6H.2a;Y106G6H.2b;Y106G6H.2c | YQGVNLYVK           | 36  | 4109  | 0.31 | 0.10 | 34  |
| 22 Y106G6H.2a;Y106G6H.2b;Y106G6H.2c | YQGVNLYVK           | 34  | 9276  | 0.33 | 0.07 | 20  |
| 10 Y106G6H.2a;Y106G6H.2b;Y106G6H.2c | QFTNVYVK            | 19  | 3471  | 0.37 | 0.16 | 44  |
| 10 Y106G6H.2a;Y106G6H.2b;Y106G6H.2c | YQGVNLYVK           | 30  | 8035  | 0.46 | 0.12 | 26  |
| 10 Y106G6H.2a;Y106G6H.2b;Y106G6H.2c | YQGVNLYVK           | 25  | 6461  | 0.49 | 0.07 | 15  |
| 22 Y106G6H.2a;Y106G6H.2b;Y106G6H.2c | QFTNVYVK            | 13  | 3440  | 0.59 | 0.06 | 10  |
| 10 Y106G6H.2a;Y106G6H.2b;Y106G6H.2c | QFTNVYVK            | 22  | 4465  | 0.62 | 0.17 | 28  |
| 22 Y106G6H.2a;Y106G6H.2b;Y106G6H.2c | YQGVNLYVK           | 38  | 7767  | 0.74 | 0.10 | 14  |
| 22 Y106G6H.2a;Y106G6H.2b;Y106G6H.2c | YQGVNLYVK           | 26  | 5043  | 0.74 | 0.08 | 11  |
| 7 Y106G6H.2a;Y106G6H.2b;Y106G6H.2c  | QFTNVYVK            | 16  | 3081  | 0.78 | 0.23 | 29  |
| 10 Y106G6H.2a;Y106G6H.2b;Y106G6H.2c | YQGVNLYVK           | 15  | 3607  | 0.79 | 0.13 | 16  |
| 10 Y106G6H.2a;Y106G6H.2b;Y106G6H.2c | GYGFVHFETEEAAQNAIQK | 18  | 1910  | 0.83 | 0.12 | 15  |
| 22 Y106G6H.2a;Y106G6H.2b;Y106G6H.2c | VNGMLLAGK           | 17  | 2257  | 0.95 | 0.13 | 14  |
| 1 Y106G6H.2a;Y106G6H.2b;Y106G6H.2c  | QFTNVYVK            | 30  | 3379  | 0.96 | 0.08 | 8   |
| 22 Y106G6H.2a;Y106G6H.2b;Y106G6H.2c | NFGDHYNK            | 39  | 6973  | 0.96 | 0.09 | 10  |
| 22 Y106G6H.2a;Y106G6H.2b;Y106G6H.2c | NFGDHYNK            | 46  | 7588  | 0.99 | 0.08 | 8   |
| 1 Y106G6H.2a;Y106G6H.2b;Y106G6H.2c  | YQGVNLYVK           | 38  | 5925  | 0.99 | 0.13 | 13  |
| 10 Y106G6H.2a;Y106G6H.2b;Y106G6H.2c | QFTNVYVK            | 26  | 2627  | 1.06 | 0.06 | 6   |
| 22 Y106G6H.2a;Y106G6H.2b;Y106G6H.2c | QFTNVYVK            | 16  | 1460  | 1.11 | 0.13 | 12  |
| 1 Y106G6H.2a;Y106G6H.2b;Y106G6H.2c  | QFTNVYVK            | 29  | 2108  | 1.15 | 0.15 | 13  |
| 1 Y106G6H.2a;Y106G6H.2b;Y106G6H.2c  | QFESYGNITSAAK       | 52  | 1532  | 1.18 | 0.21 | 17  |
| 10 Y106G6H.2a;Y106G6H.2b;Y106G6H.2c | GYGFVHFETEEAAQNAIQK | 53  | 4163  | 1.20 | 0.15 | 13  |
| 1 Y106G6H.2a;Y106G6H.2b;Y106G6H.2c  | YQGVNLYVK           | 49  | 6419  | 1.20 | 0.12 | 10  |
| 1 Y106G6H.2a;Y106G6H.2b;Y106G6H.2c  | YQGVNLYVK           | 34  | 4256  | 1.22 | 0.12 | 10  |
| 1 Y106G6H.2a;Y106G6H.2b;Y106G6H.2c  | QFTNVYVK            | 14  | 2293  | 1.22 | 0.07 | 6   |
| 7 Y106G6H.2a;Y106G6H.2b;Y106G6H.2c  | QFTNVYVK            | 17  | 7420  | 1.23 | 0.12 | 10  |
| 1 Y106G6H.2a;Y106G6H.2b;Y106G6H.2c  | YQGVNLYVK           | 52  | 4743  | 1.25 | 0.06 | 5   |
| 10 Y106G6H.2a;Y106G6H.2b;Y106G6H.2c | QFTNVYVK            | 28  | 3093  | 1.28 | 0.22 | 17  |
| 22 Y106G6H.2a;Y106G6H.2b;Y106G6H.2c | QFTNVYVK            | 25  | 6241  | 1.33 | 0.09 | 7   |
| 10 Y106G6H.2a;Y106G6H.2b;Y106G6H.2c | QFTNVYVK            | 18  | 2743  | 1.36 | 0.14 | 10  |
| 7 Y106G6H.2a;Y106G6H.2b;Y106G6H.2c  | QFTNVYVK            | 16  | 3547  | 1.37 | 0.15 | 11  |
| 1 Y106G6H.2a;Y106G6H.2b;Y106G6H.2c  | QFTNVYVK            | 23  | 3056  | 1.37 | 0.09 | 6   |
| 1 Y106G6H.2a;Y106G6H.2b;Y106G6H.2c  | QFTNVYVK            | 27  | 2817  | 1.38 | 0.06 | 4   |
| 10 Y106G6H.2a;Y106G6H.2b;Y106G6H.2c | QFTNVYVK            | 12  | 3552  | 1.41 | 0.13 | 9   |
| 1 Y106G6H.2a;Y106G6H.2b;Y106G6H.2c  | QFTNVYVK            | 26  | 3508  | 1.47 | 0.08 | 5   |
| 22 Y106G6H.2a;Y106G6H.2b;Y106G6H.2c | YQGVNLYVK           | 17  | 3628  | 1.50 | 0.09 | 6   |
| 10 Y106G6H.2a;Y106G6H.2b;Y106G6H.2c | QFTNVYVK            | 27  | 4296  | 1.55 | 0.08 | 5   |
| 10 Y106G6H.2a;Y106G6H.2b;Y106G6H.2c | YQGVNLYVK           | 23  | 4255  | 1.55 | 0.19 | 12  |
| 22 Y106G6H.2a;Y106G6H.2b;Y106G6H.2c | QFTNVYVK            | 19  | 4859  | 1.68 | 0.09 | 6   |
| 10 Y106G6H.2a;Y106G6H.2b;Y106G6H.2c | YQGVNLYVK           | 17  | 6827  | 1.75 | 0.07 | 4   |
| 22 Y106G6H.2a;Y106G6H.2b;Y106G6H.2c | YQGVNLYVK           | 34  | 6464  | 1.78 | 0.17 | 10  |
| 22 Y106G6H.2a;Y106G6H.2b;Y106G6H.2c | QFTNVYVK            | 12  | 3328  | 2.10 | 0.13 | 6   |
| 10 Y106G6H.2a;Y106G6H.2b;Y106G6H.2c | GYGFVHFETEEAAQNAIQK | 26  | 3715  | 2.15 | 0.14 | 6   |
| 10 Y106G6H.2a;Y106G6H.2b;Y106G6H.2c | YQGVNLYVK           | 22  | 5584  | 2.19 | 0.10 | 5   |
| 10 Y106G6H.2a;Y106G6H.2b;Y106G6H.2c | QFTNVYVK            | 37  | 4622  | 2.44 | 0.14 | 6   |
| 10 Y106G6H.2a;Y106G6H.2b;Y106G6H.2c | YQGVNLYVK           | 50  | 7171  | 2.83 | 0.11 | 4   |
| 10 Y106G6H.2a;Y106G6H.2b;Y106G6H.2c | YQGVNLYVK           | 30  | 5247  | 2.94 | 0.08 | 3   |
| 10 Y106G6H.2a;Y106G6H.2b;Y106G6H.2c | QFTNVYVK            | 39  | 3473  | 2.97 | 0.28 | 10  |
| 7 Y106G6H.2a;Y106G6H.2b;Y106G6H.2c  | QFTNVYVK            | 27  | 1289  | 8.87 | 0.38 | 4   |
| 10 Y110A7A.14                       | EVDALIAEHEK         | 58  | 12136 | 0.28 | 0.19 | 70  |
| 10 Y110A7A.14                       | EVDALIAEHEK         | 74  | 12290 | 0.32 | 0.20 | 62  |
| 10 Y110A7A.14                       | TVLEELTTK           | 39  | 1239  | 0.61 | 0.10 | 16  |

|                           |                    |     |       |      |      |     |
|---------------------------|--------------------|-----|-------|------|------|-----|
| 10 Y110A7A.14             | TVLEELTTK          | 54  | 1642  | 0.61 | 0.16 | 26  |
| 7 Y110A7A.14              | EVDALIAEHEK        | 56  | 4323  | 0.65 | 0.18 | 27  |
| 7 Y110A7A.14              | EVDALIAEHEK        | 79  | 4745  | 0.73 | 0.08 | 11  |
| 10 Y110A7A.14             | TVLEELTTK          | 45  | 1288  | 0.89 | 0.08 | 9   |
| 7 Y110A7A.14              | TVLEELTTK          | 46  | 1569  | 0.90 | 0.19 | 21  |
| 10 Y110A7A.14             | TVLEELTTK          | 21  | 1286  | 0.94 | 0.22 | 23  |
| 7 Y110A7A.14              | TVLEELTTK          | 82  | 2102  | 0.98 | 0.11 | 11  |
| 22 Y110A7A.14             | TVLEELTTK          | 37  | 679   | 1.06 | 0.18 | 17  |
| 10 Y110A7A.14             | TVLEELTTK          | 36  | 1168  | 1.07 | 0.16 | 15  |
| 7 Y110A7A.14              | TVLEELTTK          | 23  | 853   | 1.12 | 0.29 | 26  |
| 7 Y110A7A.14              | TVLEELTTK          | 11  | 395   | 1.18 | 0.23 | 19  |
| 7 Y110A7A.14              | TVLEELTTK          | 29  | 892   | 1.24 | 0.15 | 12  |
| 10 Y110A7A.14             | QRYTQIGGK          | 12  | 2239  | 1.30 | 0.09 | 7   |
| 7 Y110A7A.14              | TVLEELTTK          | 52  | 1247  | 1.52 | 0.22 | 14  |
| 10 Y110A7A.14             | QRYTQIGGK          | 14  | 2284  | 1.71 | 0.09 | 6   |
| 22 Y110A7A.14             | TVLEELTTK          | 42  | 1108  | 1.82 | 0.16 | 9   |
| 22 Y110A7A.14             | TVLEELTTK          | 48  | 1240  | 1.87 | 0.11 | 6   |
| 22 Y110A7A.14             | QRYTQIGGK          | 16  | 730   | 2.18 | 0.22 | 10  |
| 22 Y110A7A.19             | AFTEIIGEMK         | 22  | 1006  | 0.49 | 0.18 | 36  |
| 22 Y110A7A.19             | EIGVEPALSSFHLIK    | 27  | 1251  | 0.68 | 0.14 | 21  |
| 22 Y110A7A.19             | EIGVEPALSSFHLIK    | 22  | 1503  | 0.74 | 0.15 | 20  |
| 22 Y110A7A.19             | SGAVADLLFETLPK     | 62  | 1115  | 0.89 | 0.16 | 18  |
| 22 Y110A7A.19             | SGAVADLLFETLPK     | 63  | 1195  | 0.91 | 0.13 | 14  |
| 10 Y110A7A.19             | AFTEIIGEMK         | 13  | 646   | 2.41 | 0.12 | 5   |
| 22 Y110A7A.6a             | LAIEDMGRYLDNK      | 16  | 1889  | 0.59 | 0.18 | 31  |
| 10 Y110A7A.6a             | DLAGHTEFWK         | 17  | 1313  | 0.89 | 0.14 | 16  |
| 7 Y110A7A.6b              | IRAAQTASHLK        | 22  | 3130  | 0.40 | 0.52 | 132 |
| 1 Y110A7A.6b              | DLAGHTEFWK         | 26  | 2642  | 0.59 | 0.12 | 21  |
| 1 Y110A7A.6b              | DLAGHTEFWK         | 36  | 2119  | 0.66 | 0.15 | 23  |
| 1 Y110A7A.6b              | DLAGHTEFWK         | 26  | 2659  | 0.67 | 0.18 | 27  |
| 1 Y110A7A.6b              | DLAGHTEFWK         | 35  | 2536  | 0.76 | 0.19 | 24  |
| 1 Y110A7A.6b              | IRAAQTASHLK        | 45  | 21153 | 2.15 | 0.17 | 8   |
| 7 Y111B2A.14b;Y111B2A.14a | TFDTETLK           | 10  | 5556  | 0.62 | 0.50 | 82  |
| 7 Y111B2A.14b;Y111B2A.14a | TFDTETLK           | 11  | 6943  | 1.46 | 0.17 | 12  |
| 1 Y113G7A.9a              | FQEILGADSSHK       | 37  | 2050  | 0.62 | 0.15 | 25  |
| 1 Y113G7A.9a              | FQEILGADSSHK       | 28  | 2443  | 0.69 | 0.22 | 32  |
| 10 Y113G7A.9a             | FQEILGADSSHK       | 38  | 3301  | 0.79 | 0.16 | 21  |
| 10 Y113G7A.9a             | SQLIYPINDRLIAK     | 11  | 2093  | 1.05 | 0.10 | 9   |
| 1 Y113G7A.9a              | STLTFTRK           | 19  | 1371  | 1.19 | 0.10 | 8   |
| 10 Y113G7A.9a             | SQLIYPINDRLIAK     | 44  | 2117  | 1.30 | 0.13 | 10  |
| 1 Y113G7B.17              | VEDVHELPGGIEK      | 34  | 5296  | 0.20 | 0.25 | 126 |
| 1 Y113G7B.17              | VEDVHELPGGIEK      | 50  | 5375  | 0.20 | 0.20 | 99  |
| 10 Y113G7B.17             | VEDVHELPGGIEK      | 36  | 10516 | 0.20 | 0.22 | 109 |
| 1 Y113G7B.17              | VEDVHELPGGIEK      | 34  | 3391  | 0.21 | 0.12 | 60  |
| 1 Y113G7B.17              | IEDLTFK            | 15  | 944   | 0.30 | 0.25 | 86  |
| 10 Y113G7B.17             | SADAPVAAPAAK       | 45  | 11996 | 0.32 | 0.29 | 91  |
| 10 Y113G7B.17             | IADNNLDHIVEVIQAK   | 34  | 2530  | 0.40 | 0.39 | 98  |
| 1 Y113G7B.17              | IEDLTFK            | 21  | 850   | 0.43 | 0.21 | 49  |
| 10 Y113G7B.17             | DVDLYTVK           | 33  | 7609  | 0.43 | 0.36 | 84  |
| 10 Y113G7B.17             | IADNNLDHIVEVIQAK   | 86  | 1568  | 0.44 | 0.18 | 42  |
| 10 Y113G7B.17             | IADNNLDHIVEVIQAK   | 67  | 1816  | 0.46 | 0.27 | 59  |
| 7 Y113G7B.17              | IADNNLDHIVEVIQAK   | 26  | 2184  | 0.47 | 0.16 | 35  |
| 7 Y113G7B.17              | DVDLYTVK           | 31  | 4750  | 0.48 | 0.19 | 40  |
| 10 Y113G7B.17             | VEDVHELPGGIEK      | 38  | 11589 | 0.50 | 0.15 | 30  |
| 22 Y113G7B.17             | SADAPVAAPAAK       | 63  | 19345 | 0.51 | 0.12 | 23  |
| 10 Y113G7B.17             | IADNNLDHIVEVIQAK   | 37  | 3828  | 0.53 | 0.08 | 15  |
| 10 Y113G7B.17             | DVDLYTVK           | 31  | 5742  | 0.54 | 0.43 | 79  |
| 10 Y113G7B.17             | VEDVHELPGGIEK      | 35  | 8779  | 0.60 | 0.17 | 28  |
| 22 Y113G7B.17             | TGFSTGPDVQYTHWK    | 51  | 7705  | 0.62 | 0.14 | 22  |
| 10 Y113G7B.17             | SADAPVAAPAAK       | 70  | 21329 | 0.63 | 0.37 | 59  |
| 10 Y113G7B.17             | IADNNLDHIVEVIQAK   | 33  | 2816  | 0.63 | 0.26 | 42  |
| 22 Y113G7B.17             | SADAPVAAPAAK       | 47  | 9162  | 0.64 | 0.16 | 26  |
| 7 Y113G7B.17              | IADNNLDHIVEVIQAK   | 26  | 1998  | 0.67 | 0.12 | 18  |
| 10 Y113G7B.17             | SADAPVAAPAAK       | 64  | 15048 | 0.69 | 0.24 | 35  |
| 7 Y113G7B.17              | TGFSTGPDVQYTHWK    | 63  | 3333  | 0.69 | 0.15 | 22  |
| 7 Y113G7B.17              | VEDVHELPGGIEK      | 36  | 11693 | 0.69 | 0.15 | 21  |
| 7 Y113G7B.17              | TGFSTGPDVQYTHWK    | 38  | 2285  | 0.70 | 0.23 | 33  |
| 7 Y113G7B.17              | IADNNLDHIVEVIQAK   | 31  | 2670  | 0.73 | 0.23 | 31  |
| 7 Y113G7B.17              | TGFSTGPDVQYTHWK    | 67  | 3168  | 0.74 | 0.09 | 12  |
| 10 Y113G7B.17             | VVMDVGSGTGILSMFAAK | 41  | 1293  | 0.75 | 0.11 | 15  |
| 10 Y113G7B.17             | SADAPVAAPAAK       | 41  | 12121 | 0.76 | 0.29 | 39  |
| 7 Y113G7B.17              | VEDVHELPGGIEK      | 39  | 11323 | 0.76 | 0.12 | 16  |
| 22 Y113G7B.17             | DVDLYTVK           | 44  | 5576  | 0.77 | 0.15 | 20  |
| 22 Y113G7B.17             | TGFSTGPDVQYTHWK    | 59  | 12693 | 0.83 | 0.08 | 10  |
| 22 Y113G7B.17             | VEDVHELPGGIEK      | 56  | 14712 | 0.83 | 0.12 | 15  |
| 22 Y113G7B.17             | TGFSTGPDVQYTHWK    | 49  | 9280  | 0.84 | 0.07 | 8   |
| 22 Y113G7B.17             | VVMDVGSGTGILSMFAAK | 109 | 2774  | 0.85 | 0.15 | 17  |
| 22 Y113G7B.17             | VEDVHELPGGIEK      | 44  | 12023 | 0.86 | 0.11 | 13  |
| 7 Y113G7B.17              | VEDVHELPGGIEK      | 24  | 8079  | 0.91 | 0.07 | 8   |
| 7 Y113G7B.17              | IADNNLDHIVEVIQAK   | 32  | 3246  | 0.92 | 0.11 | 12  |
| 22 Y113G7B.17             | IADNNLDHIVEVIQAK   | 75  | 3571  | 0.94 | 0.11 | 12  |
| 22 Y113G7B.17             | IADNNLDHIVEVIQAK   | 44  | 6157  | 0.95 | 0.13 | 13  |
| 7 Y113G7B.17              | VEDVHELPGGIEK      | 41  | 6171  | 0.96 | 0.18 | 18  |
| 22 Y113G7B.17             | IADNNLDHIVEVIQAK   | 109 | 5132  | 0.98 | 0.11 | 11  |
| 22 Y113G7B.17             | IADNNLDHIVEVIQAK   | 22  | 3856  | 1.02 | 0.15 | 14  |
| 22 Y113G7B.17             | IADNNLDHIVEVIQAK   | 33  | 8712  | 1.04 | 0.12 | 11  |
| 7 Y113G7B.17              | SADAPVAAPAAK       | 54  | 7276  | 1.08 | 0.16 | 15  |
| 22 Y113G7B.17             | IADNNLDHIVEVIQAK   | 22  | 4613  | 1.09 | 0.08 | 7   |
| 22 Y113G7B.17             | DVDLYTVK           | 20  | 1905  | 1.14 | 0.16 | 14  |
| 22 Y113G7B.17             | VVMDVGSGTGILSMFAAK | 66  | 2243  | 1.16 | 0.11 | 9   |
| 7 Y113G7B.17              | SADAPVAAPAAK       | 56  | 10848 | 1.16 | 0.15 | 13  |
| 22 Y113G7B.17             | IADNNLDHIVEVIQAK   | 86  | 2487  | 1.27 | 0.16 | 12  |
| 22 Y113G7B.17             | SADAPVAAPAAK       | 61  | 22630 | 1.42 | 0.16 | 11  |
| 10 Y113G7B.17             | VVMDVGSGTGILSMFAAK | 52  | 999   | 1.44 | 0.13 | 9   |
| 22 Y113G7B.17             | SADAPVAAPAAK       | 39  | 11094 | 1.48 | 0.03 | 2   |
| 1 Y113G7B.17              | SADAPVAAPAAK       | 62  | 17540 | 1.74 | 0.32 | 19  |
| 1 Y116A8A.9               | MEENEIYAIETFGSTGK  | 31  | 950   | 0.60 | 0.16 | 26  |
| 1 Y116A8A.9               | MEENEIYAIETFGSTGK  | 50  | 827   | 0.78 | 0.16 | 21  |
| 22 Y116A8A.9              | GLLNLIK            | 20  | 1801  | 0.95 | 0.14 | 15  |
| 22 Y116A8A.9              | FPHGIDESPYLK       | 51  | 6798  | 1.06 | 0.08 | 8   |
| 10 Y116A8A.9              | FPHGIDESPYLK       | 32  | 5020  | 1.11 | 0.12 | 11  |

|                |                             |    |        |      |      |     |
|----------------|-----------------------------|----|--------|------|------|-----|
| 10 Y116A8A.9   | GLLNLIK                     | 35 | 1958   | 1.19 | 0.13 | 11  |
| 22 Y116A8A.9   | FPHGIDESPYLK                | 30 | 7084   | 1.19 | 0.15 | 13  |
| 10 Y116A8A.9   | GLLNLIK                     | 42 | 2058   | 1.32 | 0.15 | 11  |
| 22 Y116A8A.9   | GYVHDDMETSHYMK              | 22 | 2605   | 1.40 | 0.12 | 8   |
| 22 Y116A8A.9   | IPLRLQK                     | 15 | 8124   | 1.54 | 0.16 | 11  |
| 22 Y116A8A.9   | GYVHDDMETSHYMK              | 21 | 5514   | 2.01 | 0.26 | 13  |
| 22 Y116A8C.28c | AINTLNHLK                   | 20 | 566    | 1.30 | 0.14 | 11  |
| 1 Y17G7B.7     | VSPAVADATRIIYGGSVTADNAAELGK | 31 | 645    | 0.18 | 0.17 | 97  |
| 1 Y17G7B.7     | VSPAVADATRIIYGGSVTADNAAELGK | 28 | 686    | 0.31 | 0.26 | 84  |
| 10 Y17G7B.7    | VSPAVADATRIIYGGSVTADNAAELGK | 59 | 3584   | 0.36 | 0.20 | 56  |
| 22 Y17G7B.7    | VSPAVADATRIIYGGSVTADNAAELGK | 50 | 3966   | 0.40 | 0.27 | 68  |
| 10 Y17G7B.7    | VSPAVADATRIIYGGSVTADNAAELGK | 68 | 4476   | 0.45 | 0.12 | 27  |
| 10 Y17G7B.7    | FFVGGNWK                    | 27 | 9789   | 0.47 | 0.18 | 37  |
| 22 Y17G7B.7    | DVNFRQLQAIVDK               | 57 | 18606  | 0.47 | 0.15 | 32  |
| 22 Y17G7B.7    | VSPAVADATRIIYGGSVTADNAAELGK | 39 | 4587   | 0.56 | 0.30 | 53  |
| 22 Y17G7B.7    | DVNFRQLQAIVDK               | 40 | 22414  | 0.56 | 0.12 | 21  |
| 22 Y17G7B.7    | VSPAVADATRIIYGGSVTADNAAELGK | 65 | 2945   | 0.60 | 0.27 | 46  |
| 22 Y17G7B.7    | VSPAVADATRIIYGGSVTADNAAELGK | 86 | 10339  | 0.60 | 0.21 | 35  |
| 22 Y17G7B.7    | KPDIDGFLVGGASLKPDFVK        | 34 | 6832   | 0.66 | 0.67 | 102 |
| 1 Y17G7B.7     | FFVGGNWK                    | 12 | 1312   | 0.67 | 0.17 | 26  |
| 1 Y17G7B.7     | DVNFRQLQAIVDK               | 28 | 2539   | 0.68 | 0.25 | 37  |
| 1 Y17G7B.7     | DVNFRQLQAIVDK               | 19 | 2340   | 0.71 | 0.07 | 10  |
| 22 Y17G7B.7    | DVNFRQLQAIVDK               | 23 | 6946   | 0.73 | 0.31 | 43  |
| 1 Y17G7B.7     | TVHALEAGIK                  | 44 | 4571   | 0.73 | 0.06 | 8   |
| 7 Y17G7B.7     | DVNFRQLQAIVDK               | 26 | 4514   | 0.73 | 0.26 | 35  |
| 22 Y17G7B.7    | TVHALEAGIK                  | 60 | 10370  | 0.77 | 0.10 | 13  |
| 22 Y17G7B.7    | DVNFRQLQAIVDK               | 55 | 22317  | 0.77 | 0.21 | 27  |
| 22 Y17G7B.7    | VSPAVADATRIIYGGSVTADNAAELGK | 70 | 5786   | 0.81 | 0.23 | 29  |
| 22 Y17G7B.7    | TVHALEAGIK                  | 91 | 167034 | 0.81 | 0.05 | 6   |
| 22 Y17G7B.7    | VSPAVADATRIIYGGSVTADNAAELGK | 79 | 8506   | 0.81 | 0.17 | 21  |
| 22 Y17G7B.7    | DVNFRQLQAIVDK               | 55 | 14146  | 0.83 | 0.07 | 8   |
| 10 Y17G7B.7    | DVNFRQLQAIVDK               | 22 | 5279   | 0.84 | 0.30 | 36  |
| 7 Y17G7B.7     | TVHALEAGIK                  | 57 | 10666  | 0.85 | 0.05 | 6   |
| 7 Y17G7B.7     | TVHALEAGIK                  | 70 | 18949  | 0.85 | 0.08 | 9   |
| 22 Y17G7B.7    | TVHALEAGIK                  | 73 | 170549 | 0.86 | 0.10 | 12  |
| 1 Y17G7B.7     | TVHALEAGIK                  | 52 | 5638   | 0.87 | 0.16 | 19  |
| 7 Y17G7B.7     | GAFTGEISPAMIK               | 18 | 1069   | 0.88 | 0.15 | 17  |
| 10 Y17G7B.7    | GAFTGEISPAMIK               | 31 | 1915   | 0.88 | 0.10 | 11  |
| 7 Y17G7B.7     | GAFTGEISPAMIK               | 69 | 7432   | 0.88 | 0.08 | 9   |
| 22 Y17G7B.7    | DVNFRQLQAIVDK               | 33 | 6602   | 0.90 | 0.34 | 38  |
| 22 Y17G7B.7    | GAFTGEISPAMIK               | 15 | 1603   | 0.90 | 0.17 | 19  |
| 10 Y17G7B.7    | DVNFRQLQAIVDK               | 52 | 9984   | 0.91 | 0.10 | 11  |
| 22 Y17G7B.7    | TVHALEAGIK                  | 62 | 8946   | 0.92 | 0.12 | 13  |
| 10 Y17G7B.7    | TVHALEAGIK                  | 32 | 7522   | 0.92 | 0.14 | 15  |
| 22 Y17G7B.7    | TASGEQAQEVHEWIRAFK          | 37 | 4496   | 0.93 | 0.16 | 17  |
| 7 Y17G7B.7     | DVNFRQLQAIVDK               | 21 | 3914   | 0.95 | 0.13 | 13  |
| 10 Y17G7B.7    | TVHALEAGIK                  | 63 | 129460 | 0.95 | 0.09 | 10  |
| 7 Y17G7B.7     | GAFTGEISPAMIK               | 66 | 8440   | 0.97 | 0.09 | 9   |
| 10 Y17G7B.7    | TVHALEAGIK                  | 45 | 8069   | 0.98 | 0.06 | 6   |
| 1 Y17G7B.7     | GAFTGEISPAMIK               | 76 | 2308   | 1.06 | 0.12 | 11  |
| 1 Y17G7B.7     | GAFTGEISPAMIK               | 56 | 3562   | 1.07 | 0.14 | 13  |
| 10 Y17G7B.7    | DVNFRQLQAIVDK               | 29 | 8909   | 1.08 | 0.13 | 12  |
| 7 Y17G7B.7     | DVNFRQLQAIVDK               | 22 | 6895   | 1.11 | 0.14 | 13  |
| 10 Y17G7B.7    | TVHALEAGIK                  | 77 | 185618 | 1.12 | 0.06 | 6   |
| 22 Y17G7B.7    | TASGEQAQEVHEWIRAFK          | 35 | 3243   | 1.15 | 0.22 | 19  |
| 7 Y17G7B.7     | GAFTGEISPAMIK               | 14 | 2107   | 1.16 | 0.11 | 10  |
| 10 Y17G7B.7    | GAFTGEISPAMIK               | 12 | 1324   | 1.19 | 0.16 | 14  |
| 1 Y17G7B.7     | GAFTGEISPAMIK               | 46 | 2574   | 1.30 | 0.13 | 10  |
| 1 Y17G7B.7     | GAFTGEISPAMIK               | 60 | 1936   | 1.30 | 0.08 | 6   |
| 7 Y17G7B.7     | AGVLVAAQNCYK                | 14 | 1811   | 1.31 | 0.12 | 9   |
| 7 Y17G7B.7     | AGVLVAAQNCYK                | 32 | 2326   | 1.41 | 0.17 | 12  |
| 22 Y17G7B.7    | FFVGGNWK                    | 12 | 6871   | 1.45 | 0.06 | 4   |
| 22 Y17G7B.7    | FFVGGNWK                    | 27 | 8982   | 1.45 | 0.13 | 9   |
| 10 Y17G7B.7    | GAFTGEISPAMIK               | 18 | 1689   | 1.56 | 0.18 | 12  |
| 7 Y17G7B.7     | GAFTGEISPAMIK               | 52 | 2787   | 1.66 | 0.15 | 9   |
| 22 Y17G7B.7    | GAFTGEISPAMIK               | 28 | 2873   | 1.69 | 0.11 | 7   |
| 1 Y17G7B.7     | TVHALEAGIK                  | 44 | 2906   | 1.77 | 0.23 | 13  |
| 7 Y17G7B.7     | TVHALEAGIK                  | 67 | 9495   | 1.85 | 0.11 | 6   |
| 1 Y17G7B.7     | GAFTGEISPAMIK               | 60 | 2467   | 1.99 | 0.20 | 10  |
| 1 Y17G7B.7     | GAFTGEISPAMIK               | 54 | 2147   | 2.03 | 0.30 | 15  |
| 1 Y17G7B.7     | FFVGGNWK                    | 24 | 692    | 2.03 | 0.23 | 11  |
| 1 Y17G7B.7     | TVHALEAGIK                  | 52 | 5381   | 2.05 | 0.16 | 8   |
| 22 Y17G7B.7    | TVHALEAGIK                  | 58 | 6623   | 2.08 | 0.10 | 5   |
| 10 Y17G7B.7    | FFVGGNWK                    | 20 | 6304   | 2.11 | 0.12 | 6   |
| 7 Y17G7B.7     | GAFTGEISPAMIK               | 42 | 1754   | 2.13 | 0.27 | 13  |
| 22 Y17G7B.7    | TVHALEAGIK                  | 58 | 14053  | 2.18 | 0.03 | 1   |
| 7 Y17G7B.7     | TVHALEAGIK                  | 65 | 11248  | 2.30 | 0.06 | 3   |
| 10 Y17G7B.7    | FFVGGNWK                    | 23 | 4635   | 2.34 | 0.11 | 5   |
| 1 Y17G7B.7     | GAFTGEISPAMIK               | 53 | 1405   | 2.46 | 0.24 | 10  |
| 7 Y17G7B.7     | GAFTGEISPAMIK               | 55 | 3621   | 2.49 | 0.17 | 7   |
| 22 Y17G7B.7    | GAFTGEISPAMIK               | 12 | 1012   | 2.51 | 0.20 | 8   |
| 1 Y17G7B.7     | GAFTGEISPAMIK               | 53 | 3734   | 2.58 | 0.09 | 4   |
| 10 Y17G7B.7    | TVHALEAGIK                  | 59 | 10368  | 2.68 | 0.10 | 4   |
| 7 Y17G7B.7     | GAFTGEISPAMIK               | 58 | 2539   | 2.85 | 0.10 | 3   |
| 10 Y17G7B.7    | TVHALEAGIK                  | 62 | 15159  | 3.08 | 0.10 | 3   |
| 1 Y18D10A.17   | FQEVLDNLEK                  | 34 | 1407   | 0.40 | 0.11 | 28  |
| 1 Y18D10A.17   | FQEVLDNLEK                  | 42 | 2533   | 0.42 | 0.16 | 38  |
| 1 Y18D10A.17   | FQEVLDNLEK                  | 59 | 1782   | 0.50 | 0.10 | 19  |
| 1 Y18D10A.17   | FQEVLDNLEK                  | 54 | 1850   | 0.58 | 0.10 | 18  |
| 1 Y18D10A.17   | FQEVLDNLEK                  | 51 | 941    | 0.61 | 0.15 | 24  |
| 1 Y18D10A.17   | FQEVLDNLEK                  | 54 | 1245   | 0.61 | 0.16 | 26  |
| 1 Y18D10A.17   | FQEVLDNLEK                  | 46 | 1110   | 0.66 | 0.13 | 20  |
| 1 Y18D10A.17   | FQEVLDNLEK                  | 38 | 1142   | 0.66 | 0.13 | 20  |
| 10 Y18D10A.17  | FQEVLDNLEK                  | 60 | 2273   | 0.75 | 0.20 | 27  |
| 10 Y18D10A.17  | FQEVLDNLEK                  | 47 | 1910   | 0.77 | 0.15 | 20  |
| 22 Y18D10A.17  | FQEVLDNLEK                  | 59 | 2180   | 0.79 | 0.10 | 13  |
| 1 Y18D10A.17   | FQEVLDNLEK                  | 30 | 882    | 0.82 | 0.20 | 25  |
| 1 Y18D10A.17   | FQEVLDNLEK                  | 52 | 2021   | 0.83 | 0.16 | 19  |
| 10 Y18D10A.17  | FQEVLDNLEK                  | 26 | 1555   | 0.85 | 0.10 | 11  |
| 10 Y18D10A.17  | FQEVLDNLEK                  | 55 | 2127   | 0.88 | 0.18 | 20  |
| 1 Y18D10A.17   | FQEVLDNLEK                  | 64 | 1035   | 0.90 | 0.14 | 15  |

|               |                             |     |       |      |      |     |
|---------------|-----------------------------|-----|-------|------|------|-----|
| 7 Y18D10A.17  | FQEVLVDNLEK                 | 62  | 2733  | 1.01 | 0.16 | 15  |
| 22 Y18D10A.17 | FQEVLVDNLEK                 | 40  | 1986  | 1.06 | 0.13 | 12  |
| 7 Y18D10A.17  | FQEVLVDNLEK                 | 55  | 3232  | 1.17 | 0.16 | 14  |
| 1 Y18D10A.17  | FQEVLVDNLEK                 | 39  | 1351  | 1.19 | 0.17 | 15  |
| 22 Y18D10A.17 | FQEVLVDNLEK                 | 56  | 1776  | 1.22 | 0.13 | 11  |
| 22 Y18D10A.17 | FQEVLVDNLEK                 | 28  | 2234  | 1.24 | 0.12 | 10  |
| 10 Y18D10A.17 | FQEVLVDNLEK                 | 42  | 2127  | 1.26 | 0.13 | 11  |
| 10 Y18D10A.17 | FQEVLVDNLEK                 | 41  | 3007  | 1.28 | 0.20 | 16  |
| 22 Y18D10A.17 | FQEVLVDNLEK                 | 61  | 2980  | 1.30 | 0.10 | 8   |
| 10 Y18D10A.17 | FQEVLVDNLEK                 | 34  | 1380  | 1.39 | 0.20 | 15  |
| 10 Y18D10A.17 | FQEVLVDNLEK                 | 83  | 4484  | 1.44 | 0.25 | 17  |
| 22 Y18D10A.17 | FQEVLVDNLEK                 | 33  | 2475  | 1.49 | 0.22 | 15  |
| 10 Y18D10A.17 | FQEVLVDNLEK                 | 69  | 3685  | 1.50 | 0.11 | 7   |
| 1 Y18D10A.17  | FQEVLVDNLEK                 | 56  | 1670  | 1.72 | 0.09 | 5   |
| 10 Y18D10A.17 | FQEVLVDNLEK                 | 63  | 2899  | 1.95 | 0.22 | 11  |
| 22 Y18D10A.17 | FQEVLVDNLEK                 | 64  | 2692  | 2.07 | 0.20 | 10  |
| 22 Y18D10A.17 | FQEVLVDNLEK                 | 66  | 2745  | 2.09 | 0.23 | 11  |
| 22 Y18D10A.17 | FQEVLVDNLEK                 | 58  | 2564  | 2.43 | 0.07 | 3   |
| 22 Y18D10A.17 | FQEVLVDNLEK                 | 53  | 3135  | 2.64 | 0.17 | 7   |
| 7 Y18D10A.17  | FQEVLVDNLEK                 | 25  | 1778  | 3.35 | 0.19 | 6   |
| 7 Y18D10A.17  | FQEVLVDNLEK                 | 48  | 2544  | 3.95 | 0.26 | 7   |
| 22 Y18H1A.4   | YRHNYSDDSSHLSDK             | 17  | 4782  | 1.86 | 0.16 | 9   |
| 7 Y22D7AL.5a  | TLNDELELIEGMK               | 65  | 3083  | 0.08 | 0.41 | 535 |
| 7 Y22D7AL.5a  | VGLQVVAIK                   | 56  | 3079  | 0.09 | 0.36 | 408 |
| 7 Y22D7AL.5a  | FVDMFEAGIIDPTK              | 83  | 2127  | 0.13 | 0.39 | 310 |
| 7 Y22D7AL.5a  | DMGIATGATIFGDDSNLIK         | 136 | 3523  | 0.16 | 0.12 | 80  |
| 7 Y22D7AL.5a  | DMGIATGATIFGDDSNLIK         | 106 | 2664  | 0.16 | 0.15 | 95  |
| 7 Y22D7AL.5a  | DMGIATGATIFGDDSNLIK         | 122 | 2969  | 0.17 | 0.19 | 112 |
| 7 Y22D7AL.5a  | VGLQVVAIK                   | 60  | 1918  | 0.18 | 0.32 | 174 |
| 10 Y22D7AL.5a | RIEHITDEIEQSTSDYEK          | 49  | 5173  | 0.19 | 0.28 | 146 |
| 10 Y22D7AL.5a | IGGGSEVEVGEK                | 38  | 3025  | 0.19 | 0.21 | 112 |
| 7 Y22D7AL.5a  | DMGIATGATIFGDDSNLIK         | 118 | 2733  | 0.20 | 0.11 | 58  |
| 10 Y22D7AL.5a | FGAEGRQAMLVGVNLLADAVSVTMGPK | 54  | 2469  | 0.27 | 0.22 | 81  |
| 10 Y22D7AL.5a | LIQDVANK                    | 28  | 1982  | 0.28 | 0.14 | 51  |
| 10 Y22D7AL.5a | VGTTGVITVK                  | 40  | 4375  | 0.28 | 0.22 | 77  |
| 10 Y22D7AL.5a | VGLQVVAIK                   | 46  | 4057  | 0.29 | 0.26 | 91  |
| 7 Y22D7AL.5a  | ALTQPIATIVK                 | 27  | 1226  | 0.29 | 0.18 | 63  |
| 10 Y22D7AL.5a | VGLQVVAIK                   | 37  | 2156  | 0.29 | 0.17 | 60  |
| 10 Y22D7AL.5a | ALVLLSEK                    | 36  | 3848  | 0.30 | 0.30 | 101 |
| 10 Y22D7AL.5a | FVDMFEAGIIDPTK              | 25  | 1349  | 0.31 | 0.10 | 31  |
| 22 Y22D7AL.5a | AANEDQQIGVNIVK              | 54  | 3305  | 0.31 | 0.13 | 43  |
| 10 Y22D7AL.5a | DMGIATGATIFGDDSNLIK         | 74  | 623   | 0.31 | 0.14 | 45  |
| 10 Y22D7AL.5a | ALTQPIATIVK                 | 12  | 942   | 0.32 | 0.31 | 97  |
| 10 Y22D7AL.5a | AANEDQQIGVNIVK              | 62  | 6797  | 0.32 | 0.15 | 48  |
| 10 Y22D7AL.5a | FVDMFEAGIIDPTK              | 40  | 4092  | 0.32 | 0.14 | 43  |
| 10 Y22D7AL.5a | FGAEGRQAMLVGVNLLADAVSVTMGPK | 53  | 2805  | 0.32 | 0.09 | 29  |
| 10 Y22D7AL.5a | ALVLLSEK                    | 33  | 4538  | 0.33 | 0.09 | 28  |
| 7 Y22D7AL.5a  | IGGGSEVEVGEK                | 55  | 3738  | 0.34 | 0.12 | 35  |
| 10 Y22D7AL.5a | VGLQVVAIK                   | 52  | 4407  | 0.34 | 0.25 | 72  |
| 10 Y22D7AL.5a | VGTTGVITVK                  | 40  | 2950  | 0.35 | 0.21 | 60  |
| 1 Y22D7AL.5a  | ALVLLSEK                    | 34  | 4121  | 0.36 | 0.18 | 51  |
| 10 Y22D7AL.5a | ISQVQDIVPALELANK            | 51  | 1956  | 0.36 | 0.22 | 60  |
| 7 Y22D7AL.5a  | VGLQVVAIK                   | 55  | 2591  | 0.37 | 0.07 | 18  |
| 10 Y22D7AL.5a | ALVLLSEK                    | 11  | 485   | 0.37 | 0.25 | 65  |
| 10 Y22D7AL.5a | IEDITANDLGEVDEVTITK         | 42  | 5039  | 0.38 | 0.31 | 81  |
| 7 Y22D7AL.5a  | LIQDVANK                    | 24  | 1292  | 0.38 | 0.24 | 64  |
| 10 Y22D7AL.5a | AANEDQQIGVNIVK              | 71  | 11815 | 0.38 | 0.10 | 28  |
| 7 Y22D7AL.5a  | LIQDVANK                    | 40  | 24263 | 0.38 | 0.14 | 38  |
| 22 Y22D7AL.5a | ALTQPIATIVK                 | 23  | 1514  | 0.38 | 0.20 | 53  |
| 1 Y22D7AL.5a  | VGLQVVAIK                   | 70  | 2731  | 0.38 | 0.05 | 13  |
| 7 Y22D7AL.5a  | FDRGYISPYFITSAK             | 19  | 3069  | 0.38 | 0.18 | 48  |
| 22 Y22D7AL.5a | ALVLLSEK                    | 15  | 727   | 0.38 | 0.20 | 52  |
| 7 Y22D7AL.5a  | VGLQVVAIK                   | 52  | 2011  | 0.40 | 0.28 | 72  |
| 1 Y22D7AL.5a  | ALVLLSEK                    | 29  | 1493  | 0.40 | 0.15 | 38  |
| 7 Y22D7AL.5a  | VGTTGVITVK                  | 53  | 3646  | 0.40 | 0.13 | 33  |
| 10 Y22D7AL.5a | LNERLAK                     | 17  | 36616 | 0.40 | 0.08 | 19  |
| 7 Y22D7AL.5a  | ALTQPIATIVK                 | 14  | 1699  | 0.42 | 0.17 | 40  |
| 1 Y22D7AL.5a  | ALVLLSEK                    | 57  | 5002  | 0.42 | 0.05 | 11  |
| 10 Y22D7AL.5a | IEDITANDLGEVDEVTITK         | 31  | 2867  | 0.42 | 0.21 | 49  |
| 10 Y22D7AL.5a | ISQVQDIVPALELANK            | 27  | 1782  | 0.42 | 0.09 | 21  |
| 1 Y22D7AL.5a  | VGTTGVITVK                  | 72  | 2869  | 0.42 | 0.13 | 30  |
| 7 Y22D7AL.5a  | ALTQPIATIVK                 | 13  | 4575  | 0.43 | 0.21 | 49  |
| 10 Y22D7AL.5a | ALTQPIATIVK                 | 13  | 1019  | 0.43 | 0.19 | 45  |
| 7 Y22D7AL.5a  | VGLQVVAIK                   | 100 | 28288 | 0.43 | 0.10 | 23  |
| 7 Y22D7AL.5a  | VGLQVVAIK                   | 40  | 2183  | 0.43 | 0.28 | 64  |
| 7 Y22D7AL.5a  | VGLQVVAIK                   | 46  | 1430  | 0.45 | 0.15 | 35  |
| 7 Y22D7AL.5a  | VGLQVVAIK                   | 85  | 25050 | 0.45 | 0.09 | 20  |
| 10 Y22D7AL.5a | VGTTGVITVK                  | 37  | 3670  | 0.45 | 0.20 | 44  |
| 1 Y22D7AL.5a  | VGTTGVITVK                  | 65  | 3478  | 0.45 | 0.09 | 20  |
| 7 Y22D7AL.5a  | FDRGYISPYFITSAK             | 27  | 3159  | 0.46 | 0.12 | 26  |
| 10 Y22D7AL.5a | ALTQPIATIVK                 | 38  | 7106  | 0.46 | 0.13 | 29  |
| 7 Y22D7AL.5a  | ALVLLSEK                    | 38  | 44217 | 0.46 | 0.06 | 12  |
| 7 Y22D7AL.5a  | IEDITANDLGEVDEVTITK         | 64  | 2711  | 0.46 | 0.18 | 39  |
| 10 Y22D7AL.5a | FDRGYISPYFITSAK             | 21  | 1063  | 0.47 | 0.06 | 13  |
| 7 Y22D7AL.5a  | VGLQVVAIK                   | 82  | 4548  | 0.47 | 0.11 | 24  |
| 7 Y22D7AL.5a  | LIQDVANK                    | 47  | 10288 | 0.47 | 0.07 | 15  |
| 22 Y22D7AL.5a | VGTTGVITVK                  | 88  | 6056  | 0.47 | 0.20 | 43  |
| 1 Y22D7AL.5a  | ISQVQDIVPALELANK            | 63  | 1684  | 0.48 | 0.20 | 42  |
| 7 Y22D7AL.5a  | ISQVQDIVPALELANK            | 56  | 4191  | 0.48 | 0.15 | 32  |
| 7 Y22D7AL.5a  | ALTQPIATIVK                 | 16  | 1850  | 0.48 | 0.19 | 41  |
| 1 Y22D7AL.5a  | VGLQVVAIK                   | 64  | 3584  | 0.48 | 0.08 | 16  |
| 7 Y22D7AL.5a  | ALVLLSEK                    | 51  | 62240 | 0.48 | 0.05 | 11  |
| 22 Y22D7AL.5a | FDRGYISPYFITSAK             | 44  | 2397  | 0.49 | 0.15 | 31  |
| 7 Y22D7AL.5a  | AANEDQQIGVNIVK              | 72  | 6693  | 0.49 | 0.12 | 23  |
| 7 Y22D7AL.5a  | IGGGSEVEVGEK                | 53  | 3393  | 0.49 | 0.39 | 79  |
| 7 Y22D7AL.5a  | ANEEAGDGTTCATVLARAIK        | 19  | 17293 | 0.49 | 0.15 | 29  |
| 7 Y22D7AL.5a  | FDRGYISPYFITSAK             | 50  | 4130  | 0.49 | 0.15 | 30  |
| 22 Y22D7AL.5a | RIEHITDEIEQSTSDYEK          | 36  | 10198 | 0.50 | 0.17 | 33  |
| 7 Y22D7AL.5a  | VGTTGVITVK                  | 63  | 3512  | 0.50 | 0.10 | 21  |
| 22 Y22D7AL.5a | ALTQPIATIVK                 | 39  | 1417  | 0.50 | 0.26 | 51  |
| 7 Y22D7AL.5a  | IEDITANDLGEVDEVTITK         | 96  | 3740  | 0.50 | 0.18 | 36  |

|               |                      |     |        |      |      |    |
|---------------|----------------------|-----|--------|------|------|----|
| 1 Y22D7AL.5a  | VGTTGVITVK           | 61  | 3134   | 0.51 | 0.10 | 20 |
| 7 Y22D7AL.5a  | ALTQPIATIVK          | 23  | 1978   | 0.51 | 0.08 | 15 |
| 7 Y22D7AL.5a  | IEDITANDLGEVDEVTITK  | 118 | 2993   | 0.51 | 0.20 | 39 |
| 22 Y22D7AL.5a | VGTTGVITVK           | 72  | 4701   | 0.51 | 0.13 | 26 |
| 10 Y22D7AL.5a | VGLQVVAIK            | 53  | 2516   | 0.51 | 0.17 | 34 |
| 1 Y22D7AL.5a  | AANEDQQIGVNIVK       | 86  | 4766   | 0.52 | 0.08 | 15 |
| 7 Y22D7AL.5a  | VGLQVVAIK            | 73  | 4152   | 0.52 | 0.13 | 26 |
| 10 Y22D7AL.5a | ALVLLSEK             | 15  | 1082   | 0.53 | 0.10 | 20 |
| 7 Y22D7AL.5a  | VGLQVVAIK            | 45  | 2208   | 0.53 | 0.21 | 40 |
| 7 Y22D7AL.5a  | FDRGYISPYFITSAK      | 14  | 1128   | 0.53 | 0.21 | 39 |
| 1 Y22D7AL.5a  | AANEDQQIGVNIVK       | 42  | 4579   | 0.53 | 0.03 | 5  |
| 7 Y22D7AL.5a  | VGLQVVAIK            | 65  | 3663   | 0.53 | 0.13 | 25 |
| 1 Y22D7AL.5a  | DMGIATGATIFGDDSNLIK  | 55  | 734    | 0.54 | 0.35 | 66 |
| 7 Y22D7AL.5a  | IEDITANDLGEVDEVTITK  | 64  | 5328   | 0.54 | 0.26 | 48 |
| 10 Y22D7AL.5a | FDRGYISPYFITSAK      | 26  | 1644   | 0.54 | 0.16 | 30 |
| 22 Y22D7AL.5a | ALVLLSEK             | 22  | 3006   | 0.54 | 0.29 | 54 |
| 22 Y22D7AL.5a | VGLQVVAIK            | 55  | 4525   | 0.55 | 0.14 | 26 |
| 7 Y22D7AL.5a  | RIEHITDEIEQSTDYK     | 38  | 5060   | 0.55 | 0.17 | 30 |
| 7 Y22D7AL.5a  | FDRGYISPYFITSAK      | 25  | 2005   | 0.55 | 0.28 | 50 |
| 10 Y22D7AL.5a | VGTTGVITVK           | 37  | 5239   | 0.56 | 0.08 | 15 |
| 7 Y22D7AL.5a  | ALVLLSEK             | 13  | 772    | 0.56 | 0.19 | 34 |
| 22 Y22D7AL.5a | ALVLLSEK             | 14  | 2002   | 0.56 | 0.24 | 43 |
| 10 Y22D7AL.5a | ALTQPIATIVK          | 13  | 1162   | 0.56 | 0.19 | 34 |
| 1 Y22D7AL.5a  | ALTQPIATIVK          | 11  | 7505   | 0.56 | 0.17 | 30 |
| 7 Y22D7AL.5a  | ANEEAGDGTTCATVLARAIK | 22  | 9211   | 0.56 | 0.42 | 74 |
| 22 Y22D7AL.5a | VGLQVVAIK            | 91  | 21845  | 0.56 | 0.11 | 20 |
| 10 Y22D7AL.5a | IEDITANDLGEVDEVTITK  | 122 | 2316   | 0.56 | 0.20 | 36 |
| 10 Y22D7AL.5a | ALTQPIATIVK          | 40  | 5454   | 0.56 | 0.16 | 28 |
| 1 Y22D7AL.5a  | VGLQVVAIK            | 60  | 2443   | 0.56 | 0.10 | 17 |
| 22 Y22D7AL.5a | AANEDQQIGVNIVK       | 40  | 2508   | 0.56 | 0.09 | 17 |
| 10 Y22D7AL.5a | ALTQPIATIVK          | 32  | 3063   | 0.56 | 0.16 | 28 |
| 10 Y22D7AL.5a | AANEDQQIGVNIVK       | 19  | 4139   | 0.57 | 0.15 | 26 |
| 22 Y22D7AL.5a | VGLQVVAIK            | 65  | 3485   | 0.57 | 0.15 | 26 |
| 1 Y22D7AL.5a  | VGLQVVAIK            | 51  | 1260   | 0.57 | 0.16 | 28 |
| 1 Y22D7AL.5a  | VGTTGVITVK           | 80  | 3182   | 0.57 | 0.11 | 20 |
| 7 Y22D7AL.5a  | FDRGYISPYFITSAK      | 21  | 1182   | 0.57 | 0.10 | 17 |
| 7 Y22D7AL.5a  | VGLQVVAIK            | 35  | 1151   | 0.57 | 0.16 | 29 |
| 1 Y22D7AL.5a  | VGLQVVAIK            | 57  | 1487   | 0.57 | 0.08 | 13 |
| 7 Y22D7AL.5a  | FVDMFEAGIIDPTK       | 46  | 3170   | 0.58 | 0.14 | 24 |
| 22 Y22D7AL.5a | ALTQPIATIVK          | 39  | 3939   | 0.58 | 0.13 | 22 |
| 10 Y22D7AL.5a | VGLQVVAIK            | 87  | 26053  | 0.58 | 0.07 | 12 |
| 22 Y22D7AL.5a | TLNDELELIEGMK        | 69  | 2848   | 0.58 | 0.09 | 16 |
| 7 Y22D7AL.5a  | VGLQVVAIK            | 61  | 2667   | 0.58 | 0.11 | 20 |
| 1 Y22D7AL.5a  | LIQDVANK             | 16  | 1009   | 0.58 | 0.24 | 41 |
| 10 Y22D7AL.5a | IEDITANDLGEVDEVTITK  | 47  | 4445   | 0.58 | 0.28 | 47 |
| 22 Y22D7AL.5a | ALTQPIATIVK          | 21  | 1815   | 0.58 | 0.25 | 43 |
| 7 Y22D7AL.5a  | ALTQPIATIVK          | 17  | 1023   | 0.59 | 0.19 | 33 |
| 10 Y22D7AL.5a | FDRGYISPYFITSAK      | 18  | 2870   | 0.59 | 0.11 | 19 |
| 10 Y22D7AL.5a | APGFGDNRK            | 40  | 6558   | 0.59 | 0.18 | 31 |
| 7 Y22D7AL.5a  | VGLQVVAIK            | 51  | 1906   | 0.59 | 0.26 | 45 |
| 22 Y22D7AL.5a | VGLQVVAIK            | 53  | 1620   | 0.59 | 0.18 | 31 |
| 22 Y22D7AL.5a | VGTTGVITVK           | 64  | 4254   | 0.59 | 0.12 | 20 |
| 7 Y22D7AL.5a  | ALTQPIATIVK          | 34  | 26101  | 0.59 | 0.06 | 11 |
| 22 Y22D7AL.5a | ALTQPIATIVK          | 28  | 3174   | 0.60 | 0.20 | 33 |
| 10 Y22D7AL.5a | AANEDQQIGVNIVK       | 28  | 11102  | 0.60 | 0.18 | 31 |
| 10 Y22D7AL.5a | VGLQVVAIK            | 61  | 2099   | 0.61 | 0.13 | 21 |
| 7 Y22D7AL.5a  | ALTQPIATIVK          | 25  | 1403   | 0.61 | 0.19 | 31 |
| 1 Y22D7AL.5a  | GRNVIEQSWGSPK        | 29  | 539    | 0.61 | 0.18 | 30 |
| 10 Y22D7AL.5a | YQNLGAK              | 18  | 2459   | 0.61 | 0.19 | 32 |
| 22 Y22D7AL.5a | VGLQVVAIK            | 82  | 27724  | 0.61 | 0.06 | 10 |
| 22 Y22D7AL.5a | ALTQPIATIVK          | 17  | 1437   | 0.61 | 0.12 | 20 |
| 7 Y22D7AL.5a  | TLNDELELIEGMK        | 64  | 2302   | 0.61 | 0.09 | 15 |
| 22 Y22D7AL.5a | ALTQPIATIVK          | 12  | 1250   | 0.61 | 0.13 | 21 |
| 1 Y22D7AL.5a  | VGTTGVITVK           | 62  | 2546   | 0.61 | 0.15 | 24 |
| 7 Y22D7AL.5a  | DMGIATGATIFGDDSNLIK  | 70  | 1088   | 0.62 | 0.15 | 24 |
| 10 Y22D7AL.5a | VGTTGVITVK           | 124 | 22197  | 0.62 | 0.06 | 9  |
| 10 Y22D7AL.5a | AANEDQQIGVNIVK       | 13  | 5260   | 0.62 | 0.09 | 15 |
| 10 Y22D7AL.5a | VGTTGVITVK           | 122 | 24303  | 0.63 | 0.07 | 12 |
| 10 Y22D7AL.5a | IEDITANDLGEVDEVTITK  | 126 | 2178   | 0.63 | 0.14 | 23 |
| 7 Y22D7AL.5a  | VGLQVVAIK            | 52  | 2520   | 0.63 | 0.19 | 29 |
| 22 Y22D7AL.5a | VGLQVVAIK            | 58  | 4796   | 0.63 | 0.10 | 16 |
| 22 Y22D7AL.5a | AANEDQQIGVNIVK       | 50  | 3318   | 0.63 | 0.27 | 42 |
| 10 Y22D7AL.5a | ISQVQDIVPALELANK     | 60  | 2833   | 0.63 | 0.12 | 20 |
| 22 Y22D7AL.5a | AANEDQQIGVNIVK       | 78  | 9253   | 0.63 | 0.11 | 18 |
| 22 Y22D7AL.5a | LIQDVANK             | 39  | 1191   | 0.64 | 0.10 | 16 |
| 22 Y22D7AL.5a | VGLQVVAIK            | 72  | 4669   | 0.64 | 0.13 | 20 |
| 1 Y22D7AL.5a  | ALTQPIATIVK          | 13  | 1759   | 0.64 | 0.17 | 27 |
| 7 Y22D7AL.5a  | ALTQPIATIVK          | 14  | 1320   | 0.64 | 0.08 | 13 |
| 7 Y22D7AL.5a  | VGLQVVAIK            | 51  | 1628   | 0.64 | 0.27 | 41 |
| 22 Y22D7AL.5a | AANEDQQIGVNIVK       | 44  | 2161   | 0.65 | 0.22 | 33 |
| 7 Y22D7AL.5a  | ALTQPIATIVK          | 32  | 16413  | 0.65 | 0.06 | 9  |
| 10 Y22D7AL.5a | AANEDQQIGVNIVK       | 31  | 6588   | 0.65 | 0.06 | 10 |
| 10 Y22D7AL.5a | FVDMFEAGIIDPTK       | 15  | 1402   | 0.65 | 0.15 | 23 |
| 10 Y22D7AL.5a | VGLQVVAIK            | 94  | 41420  | 0.65 | 0.06 | 9  |
| 22 Y22D7AL.5a | VGTTGVITVK           | 58  | 3711   | 0.65 | 0.06 | 9  |
| 7 Y22D7AL.5a  | TLNDELELIEGMK        | 50  | 1276   | 0.65 | 0.15 | 23 |
| 22 Y22D7AL.5a | FDRGYISPYFITSAK      | 55  | 26224  | 0.65 | 0.09 | 14 |
| 1 Y22D7AL.5a  | ALTQPIATIVK          | 39  | 945    | 0.65 | 0.20 | 31 |
| 22 Y22D7AL.5a | VGTTGVITVK           | 95  | 18753  | 0.66 | 0.10 | 15 |
| 1 Y22D7AL.5a  | ALTQPIATIVK          | 17  | 2078   | 0.66 | 0.18 | 27 |
| 7 Y22D7AL.5a  | VGTTGVITVK           | 101 | 19588  | 0.66 | 0.07 | 10 |
| 1 Y22D7AL.5a  | ALTQPIATIVK          | 18  | 2371   | 0.66 | 0.09 | 13 |
| 10 Y22D7AL.5a | ALTQPIATIVK          | 20  | 2958   | 0.66 | 0.32 | 49 |
| 10 Y22D7AL.5a | RIEHITDEIEQSTDYK     | 79  | 7657   | 0.66 | 0.14 | 22 |
| 22 Y22D7AL.5a | TLNDELELIEGMK        | 75  | 2279   | 0.66 | 0.21 | 32 |
| 22 Y22D7AL.5a | ISQVQDIVPALELANK     | 46  | 1843   | 0.66 | 0.18 | 28 |
| 1 Y22D7AL.5a  | ALTQPIATIVK          | 15  | 1781   | 0.67 | 0.09 | 14 |
| 7 Y22D7AL.5a  | TLNDELELIEGMK        | 78  | 2789   | 0.67 | 0.18 | 27 |
| 22 Y22D7AL.5a | FDRGYISPYFITSAK      | 48  | 28897  | 0.67 | 0.09 | 13 |
| 22 Y22D7AL.5a | RIEHITDEIEQSTDYK     | 27  | 8654   | 0.67 | 0.22 | 33 |
| 10 Y22D7AL.5a | ALVLLSEK             | 56  | 113306 | 0.67 | 0.05 | 7  |

|    |            |                              |     |        |      |      |    |
|----|------------|------------------------------|-----|--------|------|------|----|
| 22 | Y22D7AL.5a | VGLQVVAIK                    | 64  | 3859   | 0.67 | 0.13 | 20 |
| 7  | Y22D7AL.5a | FDRGYISPYFITSAK              | 28  | 2735   | 0.68 | 0.23 | 34 |
| 22 | Y22D7AL.5a | ALVLLSEK                     | 19  | 2445   | 0.68 | 0.10 | 15 |
| 7  | Y22D7AL.5a | FDRGYISPYFITSAK              | 50  | 2791   | 0.69 | 0.16 | 23 |
| 7  | Y22D7AL.5a | VGLQVVAIK                    | 72  | 3622   | 0.69 | 0.10 | 15 |
| 10 | Y22D7AL.5a | ALTQPIATIVK                  | 11  | 1176   | 0.69 | 0.22 | 31 |
| 1  | Y22D7AL.5a | FDRGYISPYFITSAK              | 66  | 2144   | 0.69 | 0.22 | 32 |
| 10 | Y22D7AL.5a | ALVLLSEK                     | 61  | 113882 | 0.69 | 0.04 | 5  |
| 10 | Y22D7AL.5a | VGLQVVAIK                    | 59  | 2991   | 0.69 | 0.11 | 16 |
| 10 | Y22D7AL.5a | ALTQPIATIVK                  | 24  | 2074   | 0.69 | 0.20 | 29 |
| 1  | Y22D7AL.5a | DMGIATGATIFGDDSNLIK          | 119 | 1541   | 0.70 | 0.18 | 26 |
| 22 | Y22D7AL.5a | ISQVQDIVPALELANK             | 57  | 2697   | 0.70 | 0.17 | 25 |
| 7  | Y22D7AL.5a | ANEEAGDGTTCATVLARAIK         | 15  | 13836  | 0.70 | 0.28 | 41 |
| 7  | Y22D7AL.5a | IEDITANDLGEVDEVTTIK          | 123 | 1439   | 0.70 | 0.23 | 32 |
| 10 | Y22D7AL.5a | ALTQPIATIVK                  | 48  | 67920  | 0.71 | 0.09 | 13 |
| 10 | Y22D7AL.5a | RIEHITDEIEQSTDYEK            | 63  | 48683  | 0.71 | 0.19 | 26 |
| 22 | Y22D7AL.5a | AANEDQQIGVNIVK               | 53  | 12376  | 0.71 | 0.17 | 24 |
| 1  | Y22D7AL.5a | LIQDVANK                     | 46  | 3593   | 0.72 | 0.09 | 12 |
| 7  | Y22D7AL.5a | ANEEAGDGTTCATVLARAIK         | 13  | 16288  | 0.72 | 0.14 | 20 |
| 1  | Y22D7AL.5a | ALTQPIATIVK                  | 11  | 601    | 0.72 | 0.23 | 31 |
| 7  | Y22D7AL.5a | ALTQPIATIVK                  | 32  | 1142   | 0.72 | 0.08 | 12 |
| 10 | Y22D7AL.5a | APGFGDNRK                    | 46  | 12807  | 0.72 | 0.13 | 18 |
| 1  | Y22D7AL.5a | ALTQPIATIVK                  | 26  | 839    | 0.73 | 0.10 | 13 |
| 1  | Y22D7AL.5a | LNERLAK                      | 12  | 6873   | 0.73 | 0.13 | 17 |
| 22 | Y22D7AL.5a | VGTTGVITVK                   | 98  | 17878  | 0.73 | 0.07 | 10 |
| 10 | Y22D7AL.5a | RIEHITDEIEQSTDYEK            | 65  | 31192  | 0.73 | 0.11 | 16 |
| 7  | Y22D7AL.5a | VGTTGVITVK                   | 133 | 38394  | 0.73 | 0.09 | 12 |
| 7  | Y22D7AL.5a | TLNDELELIEGMK                | 43  | 1042   | 0.74 | 0.18 | 24 |
| 7  | Y22D7AL.5a | RIEHITDEIEQSTDYEK            | 70  | 25731  | 0.74 | 0.11 | 16 |
| 10 | Y22D7AL.5a | TLNDELELIEGMK                | 39  | 1382   | 0.74 | 0.16 | 22 |
| 10 | Y22D7AL.5a | FVDMFEAGIIDPTK               | 26  | 1205   | 0.74 | 0.12 | 16 |
| 7  | Y22D7AL.5a | RIEHITDEIEQSTDYEK            | 69  | 47148  | 0.74 | 0.12 | 16 |
| 10 | Y22D7AL.5a | TLNDELELIEGMK                | 92  | 2789   | 0.74 | 0.14 | 19 |
| 1  | Y22D7AL.5a | TLNDELELIEGMK                | 42  | 716    | 0.75 | 0.24 | 31 |
| 1  | Y22D7AL.5a | ALTQPIATIVK                  | 25  | 849    | 0.75 | 0.08 | 11 |
| 10 | Y22D7AL.5a | TLNDELELIEGMK                | 37  | 1313   | 0.75 | 0.13 | 18 |
| 1  | Y22D7AL.5a | FVDMFEAGIIDPTK               | 21  | 641    | 0.75 | 0.13 | 17 |
| 22 | Y22D7AL.5a | AANEDQQIGVNIVK               | 70  | 12179  | 0.75 | 0.06 | 8  |
| 10 | Y22D7AL.5a | AANEDQQIGVNIVK               | 93  | 26768  | 0.75 | 0.09 | 12 |
| 10 | Y22D7AL.5a | DMGIATGATIFGDDSNLIK          | 93  | 1711   | 0.75 | 0.17 | 23 |
| 7  | Y22D7AL.5a | VGLQVVAIK                    | 63  | 2747   | 0.76 | 0.13 | 18 |
| 7  | Y22D7AL.5a | ALTQPIATIVK                  | 11  | 851    | 0.76 | 0.14 | 19 |
| 10 | Y22D7AL.5a | VGTTGVITVK                   | 38  | 4584   | 0.76 | 0.13 | 17 |
| 1  | Y22D7AL.5a | DMGIATGATIFGDDSNLIK          | 122 | 1953   | 0.76 | 0.16 | 21 |
| 1  | Y22D7AL.5a | FDRGYISPYFITSAK              | 38  | 5684   | 0.76 | 0.09 | 12 |
| 1  | Y22D7AL.5a | DMGIATGATIFGDDSNLIK          | 80  | 473    | 0.76 | 0.07 | 9  |
| 7  | Y22D7AL.5a | VGLQVVAIK                    | 63  | 3057   | 0.76 | 0.13 | 17 |
| 22 | Y22D7AL.5a | FDRGYISPYFITSAK              | 51  | 3462   | 0.77 | 0.15 | 20 |
| 7  | Y22D7AL.5a | YQNLGAK                      | 15  | 1309   | 0.77 | 0.23 | 30 |
| 10 | Y22D7AL.5a | VGLQVVAIK                    | 75  | 5056   | 0.77 | 0.14 | 18 |
| 7  | Y22D7AL.5a | VGTTGVITVK                   | 27  | 1016   | 0.78 | 0.14 | 19 |
| 1  | Y22D7AL.5a | FDRGYISPYFITSAK              | 15  | 940    | 0.78 | 0.14 | 18 |
| 1  | Y22D7AL.5a | FVDMFEAGIIDPTK               | 15  | 498    | 0.78 | 0.13 | 17 |
| 22 | Y22D7AL.5a | NAGLEPSSIIDVTGNSNTSYGYDALNGK | 39  | 4601   | 0.78 | 0.21 | 27 |
| 1  | Y22D7AL.5a | DMGIATGATIFGDDSNLIK          | 38  | 1830   | 0.78 | 0.17 | 21 |
| 7  | Y22D7AL.5a | VGLQVVAIK                    | 51  | 2791   | 0.78 | 0.24 | 31 |
| 10 | Y22D7AL.5a | DMGIATGATIFGDDSNLIK          | 132 | 4507   | 0.79 | 0.15 | 19 |
| 22 | Y22D7AL.5a | ALTQPIATIVK                  | 41  | 16244  | 0.79 | 0.09 | 12 |
| 10 | Y22D7AL.5a | ALTQPIATIVK                  | 12  | 1567   | 0.79 | 0.09 | 11 |
| 10 | Y22D7AL.5a | ALTQPIATIVK                  | 12  | 1605   | 0.79 | 0.11 | 14 |
| 7  | Y22D7AL.5a | FVDMFEAGIIDPTK               | 32  | 2567   | 0.79 | 0.15 | 20 |
| 7  | Y22D7AL.5a | VGTTGVITVK                   | 61  | 2761   | 0.79 | 0.16 | 21 |
| 22 | Y22D7AL.5a | VGLQVVAIK                    | 78  | 2656   | 0.79 | 0.19 | 24 |
| 22 | Y22D7AL.5a | FDRGYISPYFITSAK              | 36  | 1633   | 0.80 | 0.12 | 15 |
| 22 | Y22D7AL.5a | APGFGDNRK                    | 26  | 7036   | 0.80 | 0.12 | 15 |
| 22 | Y22D7AL.5a | RIEHITDEIEQSTDYEK            | 65  | 35017  | 0.80 | 0.12 | 15 |
| 7  | Y22D7AL.5a | AANEDQQIGVNIVK               | 88  | 7946   | 0.80 | 0.13 | 16 |
| 10 | Y22D7AL.5a | APGFGDNRK                    | 12  | 2219   | 0.80 | 0.08 | 9  |
| 10 | Y22D7AL.5a | FDRGYISPYFITSAK              | 40  | 1168   | 0.80 | 0.14 | 17 |
| 22 | Y22D7AL.5a | VGLQVVAIK                    | 41  | 1617   | 0.80 | 0.12 | 15 |
| 1  | Y22D7AL.5a | ALTQPIATIVK                  | 24  | 2749   | 0.80 | 0.15 | 19 |
| 7  | Y22D7AL.5a | VGTTGVITVK                   | 59  | 3991   | 0.81 | 0.17 | 21 |
| 22 | Y22D7AL.5a | GRNVIIEQSWGSPK               | 43  | 584    | 0.81 | 0.10 | 12 |
| 1  | Y22D7AL.5a | TLNDELELIEGMK                | 69  | 1401   | 0.81 | 0.10 | 12 |
| 7  | Y22D7AL.5a | RIEHITDEIEQSTDYEK            | 45  | 5042   | 0.81 | 0.11 | 14 |
| 1  | Y22D7AL.5a | TLNDELELIEGMK                | 47  | 744    | 0.81 | 0.14 | 18 |
| 1  | Y22D7AL.5a | ALTQPIATIVK                  | 11  | 822    | 0.81 | 0.16 | 20 |
| 22 | Y22D7AL.5a | ALTQPIATIVK                  | 48  | 20095  | 0.81 | 0.17 | 21 |
| 1  | Y22D7AL.5a | TLNDELELIEGMK                | 63  | 1440   | 0.82 | 0.16 | 20 |
| 10 | Y22D7AL.5a | VGLQVVAIK                    | 66  | 1965   | 0.82 | 0.08 | 10 |
| 10 | Y22D7AL.5a | RIEHITDEIEQSTDYEK            | 35  | 5104   | 0.82 | 0.17 | 20 |
| 10 | Y22D7AL.5a | DMGIATGATIFGDDSNLIK          | 70  | 1024   | 0.82 | 0.12 | 15 |
| 10 | Y22D7AL.5a | APGFGDNRK                    | 35  | 4542   | 0.82 | 0.19 | 23 |
| 7  | Y22D7AL.5a | ALTQPIATIVK                  | 30  | 1358   | 0.82 | 0.16 | 20 |
| 1  | Y22D7AL.5a | RIEHITDEIEQSTDYEK            | 16  | 3400   | 0.83 | 0.14 | 17 |
| 1  | Y22D7AL.5a | FDRGYISPYFITSAK              | 50  | 5582   | 0.83 | 0.08 | 10 |
| 1  | Y22D7AL.5a | LIQDVANK                     | 48  | 3911   | 0.83 | 0.17 | 20 |
| 10 | Y22D7AL.5a | FVDMFEAGIIDPTK               | 51  | 1350   | 0.83 | 0.08 | 10 |
| 1  | Y22D7AL.5a | FDRGYISPYFITSAK              | 23  | 1936   | 0.84 | 0.15 | 17 |
| 22 | Y22D7AL.5a | AANEDQQIGVNIVK               | 29  | 9440   | 0.84 | 0.04 | 5  |
| 7  | Y22D7AL.5a | VGLQVVAIK                    | 60  | 2118   | 0.84 | 0.13 | 16 |
| 22 | Y22D7AL.5a | VGLQVVAIK                    | 72  | 3493   | 0.85 | 0.12 | 14 |
| 22 | Y22D7AL.5a | RIEHITDEIEQSTDYEK            | 38  | 3231   | 0.85 | 0.17 | 20 |
| 22 | Y22D7AL.5a | ALTQPIATIVK                  | 19  | 796    | 0.85 | 0.20 | 23 |
| 1  | Y22D7AL.5a | AANEDQQIGVNIVK               | 97  | 9833   | 0.85 | 0.12 | 14 |
| 10 | Y22D7AL.5a | AANEDQQIGVNIVK               | 100 | 11319  | 0.85 | 0.07 | 8  |
| 7  | Y22D7AL.5a | VGLQVVAIK                    | 60  | 4086   | 0.85 | 0.15 | 17 |
| 22 | Y22D7AL.5a | GRNVIIEQSWGSPK               | 47  | 1506   | 0.85 | 0.14 | 16 |
| 7  | Y22D7AL.5a | FVDMFEAGIIDPTK               | 14  | 1798   | 0.86 | 0.23 | 27 |
| 7  | Y22D7AL.5a | ALTQPIATIVK                  | 18  | 3614   | 0.86 | 0.17 | 19 |
| 10 | Y22D7AL.5a | TLNDELELIEGMK                | 64  | 1832   | 0.86 | 0.24 | 28 |

|               |                     |     |       |      |      |    |
|---------------|---------------------|-----|-------|------|------|----|
| 10 Y22D7AL.5a | TLNDELELIEGMK       | 54  | 2018  | 0.86 | 0.14 | 17 |
| 22 Y22D7AL.5a | ALTQPIATIVK         | 18  | 1772  | 0.86 | 0.19 | 23 |
| 7 Y22D7AL.5a  | RIEHITDEIEQSTSDYEK  | 29  | 10021 | 0.86 | 0.15 | 17 |
| 7 Y22D7AL.5a  | IEDITANDLGEVDEVTITK | 55  | 4325  | 0.86 | 0.19 | 22 |
| 7 Y22D7AL.5a  | VGLQVVAIK           | 57  | 8329  | 0.86 | 0.15 | 17 |
| 10 Y22D7AL.5a | TLNDELELIEGMK       | 70  | 2102  | 0.86 | 0.12 | 14 |
| 10 Y22D7AL.5a | DMGIATGATIFGDDSNLIK | 153 | 7166  | 0.86 | 0.15 | 18 |
| 7 Y22D7AL.5a  | AANEDQQIGVNIVK      | 90  | 15850 | 0.87 | 0.08 | 9  |
| 10 Y22D7AL.5a | VGLQVVAIK           | 58  | 1900  | 0.87 | 0.10 | 12 |
| 7 Y22D7AL.5a  | RIEHITDEIEQSTSDYEK  | 31  | 3093  | 0.87 | 0.11 | 13 |
| 7 Y22D7AL.5a  | VGLQVVAIK           | 50  | 5055  | 0.87 | 0.09 | 11 |
| 22 Y22D7AL.5a | GRNVIIQSWGSPK       | 19  | 5193  | 0.87 | 0.13 | 15 |
| 22 Y22D7AL.5a | RIEHITDEIEQSTSDYEK  | 42  | 14190 | 0.87 | 0.14 | 16 |
| 10 Y22D7AL.5a | LIQDVANK            | 45  | 8988  | 0.87 | 0.07 | 8  |
| 22 Y22D7AL.5a | TLNDELELIEGMK       | 55  | 1613  | 0.88 | 0.17 | 19 |
| 7 Y22D7AL.5a  | APGFGDNRK           | 50  | 9012  | 0.88 | 0.14 | 16 |
| 10 Y22D7AL.5a | ALTQPIATIVK         | 50  | 86708 | 0.88 | 0.07 | 7  |
| 22 Y22D7AL.5a | DMGIATGATIFGDDSNLIK | 130 | 2518  | 0.89 | 0.15 | 17 |
| 7 Y22D7AL.5a  | FVDMFEAGIIDPTK      | 34  | 1887  | 0.89 | 0.13 | 14 |
| 22 Y22D7AL.5a | RIEHITDEIEQSTSDYEK  | 61  | 22445 | 0.89 | 0.11 | 12 |
| 1 Y22D7AL.5a  | FVDMFEAGIIDPTK      | 28  | 846   | 0.89 | 0.08 | 9  |
| 7 Y22D7AL.5a  | ALTQPIATIVK         | 13  | 1248  | 0.89 | 0.05 | 6  |
| 1 Y22D7AL.5a  | TLNDELELIEGMK       | 57  | 1800  | 0.90 | 0.10 | 11 |
| 10 Y22D7AL.5a | LIQDVANK            | 61  | 15015 | 0.90 | 0.17 | 19 |
| 1 Y22D7AL.5a  | TLNDELELIEGMK       | 93  | 1636  | 0.91 | 0.13 | 15 |
| 10 Y22D7AL.5a | VGTTGVITVK          | 31  | 4322  | 0.91 | 0.12 | 13 |
| 10 Y22D7AL.5a | GRNVIIQSWGSPK       | 32  | 1072  | 0.91 | 0.19 | 21 |
| 1 Y22D7AL.5a  | ALVLLSEK            | 48  | 3139  | 0.92 | 0.09 | 10 |
| 22 Y22D7AL.5a | DMGIATGATIFGDDSNLIK | 11  | 5347  | 0.92 | 0.06 | 7  |
| 1 Y22D7AL.5a  | RIEHITDEIEQSTSDYEK  | 31  | 4200  | 0.92 | 0.17 | 18 |
| 22 Y22D7AL.5a | VGLQVVAIK           | 25  | 2107  | 0.92 | 0.15 | 16 |
| 1 Y22D7AL.5a  | LIQDVANK            | 53  | 3604  | 0.92 | 0.08 | 9  |
| 1 Y22D7AL.5a  | ALVLLSEK            | 62  | 3074  | 0.93 | 0.10 | 11 |
| 1 Y22D7AL.5a  | TLNDELELIEGMK       | 57  | 965   | 0.93 | 0.20 | 21 |
| 22 Y22D7AL.5a | IEDITANDLGEVDEVTITK | 133 | 2389  | 0.93 | 0.14 | 15 |
| 22 Y22D7AL.5a | FVDMFEAGIIDPTK      | 28  | 1552  | 0.93 | 0.11 | 12 |
| 22 Y22D7AL.5a | FVDMFEAGIIDPTK      | 21  | 1277  | 0.94 | 0.22 | 24 |
| 1 Y22D7AL.5a  | LIQDVANK            | 62  | 11650 | 0.94 | 0.10 | 11 |
| 10 Y22D7AL.5a | VGLQVVAIK           | 64  | 3970  | 0.94 | 0.10 | 10 |
| 22 Y22D7AL.5a | VGTTGVITVK          | 41  | 2918  | 0.94 | 0.16 | 17 |
| 10 Y22D7AL.5a | FDRGYISPYFITSAK     | 29  | 2210  | 0.95 | 0.09 | 9  |
| 1 Y22D7AL.5a  | TLNDELELIEGMK       | 92  | 2793  | 0.95 | 0.12 | 13 |
| 1 Y22D7AL.5a  | TLNDELELIEGMK       | 37  | 407   | 0.95 | 0.11 | 12 |
| 7 Y22D7AL.5a  | TLNDELELIEGMK       | 82  | 5302  | 0.95 | 0.14 | 15 |
| 1 Y22D7AL.5a  | VGLQVVAIK           | 78  | 3320  | 0.95 | 0.14 | 15 |
| 10 Y22D7AL.5a | FDRGYISPYFITSAK     | 30  | 5943  | 0.95 | 0.12 | 12 |
| 10 Y22D7AL.5a | VGLQVVAIK           | 71  | 3810  | 0.96 | 0.09 | 10 |
| 22 Y22D7AL.5a | FDRGYISPYFITSAK     | 40  | 5620  | 0.96 | 0.08 | 9  |
| 10 Y22D7AL.5a | ISQVQDIVPALELANK    | 61  | 2311  | 0.96 | 0.18 | 19 |
| 22 Y22D7AL.5a | ALVLLSEK            | 44  | 74200 | 0.96 | 0.06 | 6  |
| 1 Y22D7AL.5a  | ALVLLSEK            | 69  | 43824 | 0.96 | 0.04 | 5  |
| 10 Y22D7AL.5a | VGLQVVAIK           | 70  | 4158  | 0.96 | 0.09 | 10 |
| 7 Y22D7AL.5a  | RIEHITDEIEQSTSDYEK  | 56  | 7767  | 0.96 | 0.15 | 16 |
| 7 Y22D7AL.5a  | VGLQVVAIK           | 53  | 2739  | 0.96 | 0.20 | 20 |
| 10 Y22D7AL.5a | APGFGDNRK           | 15  | 24879 | 0.96 | 0.11 | 12 |
| 1 Y22D7AL.5a  | FVDMFEAGIIDPTK      | 26  | 799   | 0.96 | 0.19 | 20 |
| 22 Y22D7AL.5a | VGTTGVITVK          | 43  | 2391  | 0.97 | 0.11 | 11 |
| 22 Y22D7AL.5a | DDTLLRGRGDQTEIEK    | 29  | 5360  | 0.97 | 0.26 | 27 |
| 7 Y22D7AL.5a  | ALTQPIATIVK         | 25  | 1613  | 0.97 | 0.27 | 28 |
| 22 Y22D7AL.5a | FDRGYISPYFITSAK     | 33  | 1861  | 0.97 | 0.19 | 20 |
| 22 Y22D7AL.5a | GRNVIIQSWGSPK       | 86  | 8970  | 0.97 | 0.10 | 10 |
| 10 Y22D7AL.5a | LNERLAK             | 12  | 3580  | 0.97 | 0.07 | 8  |
| 7 Y22D7AL.5a  | VGLQVVAIK           | 36  | 1141  | 0.97 | 0.24 | 24 |
| 1 Y22D7AL.5a  | TLNDELELIEGMK       | 75  | 3487  | 0.98 | 0.13 | 13 |
| 22 Y22D7AL.5a | VGLQVVAIK           | 42  | 2249  | 0.98 | 0.15 | 15 |
| 7 Y22D7AL.5a  | FDRGYISPYFITSAK     | 21  | 1072  | 0.99 | 0.08 | 8  |
| 1 Y22D7AL.5a  | TLNDELELIEGMK       | 45  | 655   | 0.99 | 0.21 | 21 |
| 1 Y22D7AL.5a  | AANEDQQIGVNIVK      | 111 | 7852  | 0.99 | 0.13 | 13 |
| 1 Y22D7AL.5a  | VGLQVVAIK           | 99  | 18305 | 0.99 | 0.07 | 7  |
| 10 Y22D7AL.5a | VGLQVVAIK           | 55  | 2661  | 0.99 | 0.10 | 10 |
| 1 Y22D7AL.5a  | VGLQVVAIK           | 91  | 15912 | 0.99 | 0.05 | 5  |
| 1 Y22D7AL.5a  | VGLQVVAIK           | 40  | 1229  | 1.00 | 0.10 | 10 |
| 7 Y22D7AL.5a  | VGLQVVAIK           | 31  | 4780  | 1.00 | 0.15 | 15 |
| 1 Y22D7AL.5a  | RIEHITDEIEQSTSDYEK  | 56  | 4901  | 1.01 | 0.15 | 15 |
| 1 Y22D7AL.5a  | ALTQPIATIVK         | 14  | 1186  | 1.01 | 0.18 | 18 |
| 10 Y22D7AL.5a | VGLQVVAIK           | 67  | 3715  | 1.01 | 0.11 | 11 |
| 7 Y22D7AL.5a  | ALTQPIATIVK         | 20  | 2157  | 1.01 | 0.09 | 8  |
| 1 Y22D7AL.5a  | ALVLLSEK            | 53  | 43798 | 1.02 | 0.04 | 4  |
| 7 Y22D7AL.5a  | VGLQVVAIK           | 83  | 8258  | 1.02 | 0.10 | 10 |
| 1 Y22D7AL.5a  | VGLQVVAIK           | 58  | 3531  | 1.02 | 0.08 | 7  |
| 1 Y22D7AL.5a  | YQNLGAK             | 19  | 2766  | 1.02 | 0.09 | 9  |
| 1 Y22D7AL.5a  | FDRGYISPYFITSAK     | 20  | 797   | 1.02 | 0.14 | 13 |
| 7 Y22D7AL.5a  | VGTTGVITVK          | 50  | 2609  | 1.02 | 0.16 | 15 |
| 22 Y22D7AL.5a | IEDITANDLGEVDEVTITK | 121 | 2655  | 1.02 | 0.16 | 15 |
| 10 Y22D7AL.5a | ALTQPIATIVK         | 10  | 831   | 1.03 | 0.16 | 15 |
| 1 Y22D7AL.5a  | VGTTGVITVK          | 36  | 340   | 1.03 | 0.36 | 35 |
| 10 Y22D7AL.5a | ALTQPIATIVK         | 38  | 2173  | 1.03 | 0.11 | 11 |
| 22 Y22D7AL.5a | GRNVIIQSWGSPK       | 69  | 2097  | 1.03 | 0.08 | 8  |
| 7 Y22D7AL.5a  | TLNDELELIEGMK       | 36  | 1435  | 1.03 | 0.16 | 16 |
| 22 Y22D7AL.5a | VGLQVVAIK           | 54  | 2187  | 1.04 | 0.12 | 12 |
| 7 Y22D7AL.5a  | RIEHITDEIEQSTSDYEK  | 40  | 8532  | 1.04 | 0.15 | 15 |
| 1 Y22D7AL.5a  | RIEHITDEIEQSTSDYEK  | 64  | 12322 | 1.04 | 0.13 | 12 |
| 22 Y22D7AL.5a | APGFGDNRK           | 28  | 10490 | 1.04 | 0.05 | 5  |
| 22 Y22D7AL.5a | ALVLLSEK            | 48  | 87247 | 1.05 | 0.04 | 4  |
| 7 Y22D7AL.5a  | VGLQVVAIK           | 82  | 10547 | 1.06 | 0.13 | 12 |
| 22 Y22D7AL.5a | GRNVIIQSWGSPK       | 69  | 2326  | 1.06 | 0.21 | 20 |
| 22 Y22D7AL.5a | TLNDELELIEGMK       | 100 | 4225  | 1.06 | 0.09 | 9  |
| 10 Y22D7AL.5a | RIEHITDEIEQSTSDYEK  | 48  | 6412  | 1.06 | 0.15 | 14 |
| 7 Y22D7AL.5a  | APGFGDNRK           | 11  | 1742  | 1.06 | 0.29 | 27 |
| 10 Y22D7AL.5a | VGLQVVAIK           | 60  | 3125  | 1.06 | 0.13 | 12 |
| 1 Y22D7AL.5a  | DMGIATGATIFGDDSNLIK | 131 | 1336  | 1.06 | 0.24 | 23 |

|               |                                 |     |       |      |      |    |
|---------------|---------------------------------|-----|-------|------|------|----|
| 10 Y22D7AL.5a | GRNVIIQSWGSPK                   | 71  | 1919  | 1.06 | 0.15 | 14 |
| 1 Y22D7AL.5a  | APGFGDNRK                       | 41  | 12663 | 1.06 | 0.14 | 13 |
| 10 Y22D7AL.5a | ALVLLSEK                        | 17  | 1936  | 1.07 | 0.31 | 29 |
| 22 Y22D7AL.5a | LIQDVANK                        | 46  | 2605  | 1.07 | 0.20 | 18 |
| 22 Y22D7AL.5a | ALTQPIATIVK                     | 14  | 1198  | 1.07 | 0.29 | 27 |
| 1 Y22D7AL.5a  | TLNDELELIEGMK                   | 66  | 1546  | 1.07 | 0.17 | 16 |
| 22 Y22D7AL.5a | LNERLAK                         | 10  | 3552  | 1.08 | 0.14 | 13 |
| 7 Y22D7AL.5a  | LIQDVANK                        | 17  | 2656  | 1.08 | 0.12 | 11 |
| 1 Y22D7AL.5a  | DMGIATGATIFGDDSNLIK             | 47  | 1842  | 1.08 | 0.11 | 10 |
| 22 Y22D7AL.5a | RIEHITDEIEQSTSDYEK              | 48  | 4736  | 1.09 | 0.15 | 14 |
| 10 Y22D7AL.5a | TLNDELELIEGMK                   | 42  | 1671  | 1.09 | 0.08 | 7  |
| 7 Y22D7AL.5a  | TLNDELELIEGMK                   | 92  | 3880  | 1.09 | 0.13 | 12 |
| 10 Y22D7AL.5a | ALVLLSEK                        | 10  | 1374  | 1.09 | 0.23 | 21 |
| 10 Y22D7AL.5a | VGLQVVAIK                       | 79  | 4950  | 1.09 | 0.08 | 7  |
| 22 Y22D7AL.5a | ALTQPIATIVK                     | 28  | 2048  | 1.09 | 0.13 | 11 |
| 22 Y22D7AL.5a | DMGIATGATIFGDDSNLIK             | 32  | 1567  | 1.10 | 0.15 | 13 |
| 10 Y22D7AL.5a | TLNDELELIEGMK                   | 81  | 4846  | 1.10 | 0.08 | 8  |
| 10 Y22D7AL.5a | GRNVIIQSWGSPK                   | 38  | 859   | 1.10 | 0.16 | 14 |
| 22 Y22D7AL.5a | RIEHITDEIEQSTSDYEK              | 74  | 12196 | 1.10 | 0.10 | 10 |
| 1 Y22D7AL.5a  | APGFGDNRK                       | 19  | 10313 | 1.11 | 0.11 | 10 |
| 1 Y22D7AL.5a  | TLNDELELIEGMK                   | 49  | 1168  | 1.11 | 0.06 | 5  |
| 10 Y22D7AL.5a | FVDMFEAGIIDPTK                  | 35  | 944   | 1.11 | 0.13 | 12 |
| 1 Y22D7AL.5a  | RIEHITDEIEQSTSDYEK              | 28  | 5165  | 1.11 | 0.19 | 17 |
| 10 Y22D7AL.5a | ALVLLSEK                        | 19  | 1062  | 1.11 | 0.11 | 10 |
| 22 Y22D7AL.5a | NAGLEPSSIIDEV TGN SNTSYGYDALNGK | 70  | 3543  | 1.11 | 0.13 | 11 |
| 22 Y22D7AL.5a | AANEDQQIGVNIVK                  | 100 | 14764 | 1.12 | 0.06 | 5  |
| 22 Y22D7AL.5a | AANEDQQIGVNIVK                  | 116 | 15789 | 1.12 | 0.12 | 11 |
| 7 Y22D7AL.5a  | DMGIATGATIFGDDSNLIK             | 144 | 4607  | 1.13 | 0.14 | 13 |
| 1 Y22D7AL.5a  | VGTTGVITVK                      | 56  | 3616  | 1.13 | 0.20 | 18 |
| 10 Y22D7AL.5a | FDRGYISPYFITS AK                | 43  | 3145  | 1.13 | 0.15 | 13 |
| 10 Y22D7AL.5a | RIEHITDEIEQSTSDYEK              | 65  | 6375  | 1.13 | 0.22 | 19 |
| 22 Y22D7AL.5a | GRNVIIQSWGSPK                   | 70  | 6102  | 1.13 | 0.08 | 7  |
| 1 Y22D7AL.5a  | DMGIATGATIFGDDSNLIK             | 120 | 2173  | 1.13 | 0.11 | 9  |
| 1 Y22D7AL.5a  | ALTQPIATIVK                     | 36  | 2767  | 1.14 | 0.16 | 14 |
| 1 Y22D7AL.5a  | ALTQPIATIVK                     | 33  | 2279  | 1.14 | 0.14 | 12 |
| 7 Y22D7AL.5a  | VGLQVVAIK                       | 50  | 2698  | 1.14 | 0.17 | 15 |
| 10 Y22D7AL.5a | VGLQVVAIK                       | 54  | 2520  | 1.14 | 0.14 | 13 |
| 7 Y22D7AL.5a  | RIEHITDEIEQSTSDYEK              | 75  | 12690 | 1.15 | 0.16 | 14 |
| 7 Y22D7AL.5a  | APGFGDNRK                       | 31  | 5462  | 1.15 | 0.26 | 22 |
| 1 Y22D7AL.5a  | VGTTGVITVK                      | 65  | 4606  | 1.16 | 0.13 | 11 |
| 22 Y22D7AL.5a | DMGIATGATIFGDDSNLIK             | 161 | 6205  | 1.17 | 0.16 | 13 |
| 1 Y22D7AL.5a  | ALTQPIATIVK                     | 29  | 3708  | 1.17 | 0.11 | 9  |
| 10 Y22D7AL.5a | FDRGYISPYFITS AK                | 41  | 2457  | 1.18 | 0.09 | 8  |
| 22 Y22D7AL.5a | DMGIATGATIFGDDSNLIK             | 151 | 6290  | 1.18 | 0.09 | 7  |
| 10 Y22D7AL.5a | FDRGYISPYFITS AK                | 24  | 3976  | 1.18 | 0.15 | 13 |
| 22 Y22D7AL.5a | APGFGDNRK                       | 10  | 9074  | 1.18 | 0.15 | 12 |
| 1 Y22D7AL.5a  | VGLQVVAIK                       | 52  | 1370  | 1.19 | 0.20 | 17 |
| 7 Y22D7AL.5a  | APGFGDNRK                       | 34  | 10089 | 1.20 | 0.13 | 11 |
| 7 Y22D7AL.5a  | APGFGDNRK                       | 20  | 2199  | 1.21 | 0.20 | 17 |
| 10 Y22D7AL.5a | APGFGDNRK                       | 22  | 12139 | 1.21 | 0.23 | 19 |
| 7 Y22D7AL.5a  | LIQDVANK                        | 30  | 1570  | 1.22 | 0.19 | 16 |
| 7 Y22D7AL.5a  | GRNVIIQSWGSPK                   | 43  | 985   | 1.22 | 0.13 | 10 |
| 1 Y22D7AL.5a  | YQNLGAK                         | 10  | 2410  | 1.24 | 0.19 | 16 |
| 22 Y22D7AL.5a | VGLQVVAIK                       | 75  | 4776  | 1.24 | 0.06 | 5  |
| 10 Y22D7AL.5a | VGLQVVAIK                       | 65  | 2882  | 1.25 | 0.11 | 9  |
| 1 Y22D7AL.5a  | RIEHITDEIEQSTSDYEK              | 52  | 5912  | 1.25 | 0.15 | 12 |
| 10 Y22D7AL.5a | ALTQPIATIVK                     | 11  | 1363  | 1.26 | 0.06 | 5  |
| 1 Y22D7AL.5a  | GRNVIIQSWGSPK                   | 58  | 1663  | 1.26 | 0.15 | 12 |
| 1 Y22D7AL.5a  | GRNVIIQSWGSPK                   | 73  | 1432  | 1.26 | 0.20 | 16 |
| 22 Y22D7AL.5a | TLNDELELIEGMK                   | 70  | 1963  | 1.26 | 0.14 | 11 |
| 10 Y22D7AL.5a | RIEHITDEIEQSTSDYEK              | 58  | 7488  | 1.26 | 0.13 | 11 |
| 1 Y22D7AL.5a  | VGTTGVITVK                      | 52  | 1971  | 1.26 | 0.09 | 7  |
| 7 Y22D7AL.5a  | AANEDQQIGVNIVK                  | 26  | 1671  | 1.27 | 0.20 | 16 |
| 10 Y22D7AL.5a | RIEHITDEIEQSTSDYEK              | 41  | 10956 | 1.28 | 0.10 | 8  |
| 10 Y22D7AL.5a | TLNDELELIEGMK                   | 59  | 3948  | 1.28 | 0.08 | 7  |
| 7 Y22D7AL.5a  | VGTTGVITVK                      | 41  | 1334  | 1.30 | 0.10 | 8  |
| 22 Y22D7AL.5a | DMGIATGATIFGDDSNLIK             | 82  | 2077  | 1.30 | 0.14 | 11 |
| 7 Y22D7AL.5a  | DMGIATGATIFGDDSNLIK             | 122 | 2786  | 1.31 | 0.20 | 15 |
| 1 Y22D7AL.5a  | VGLQVVAIK                       | 41  | 1250  | 1.31 | 0.14 | 11 |
| 10 Y22D7AL.5a | VGTTGVITVK                      | 65  | 2522  | 1.32 | 0.10 | 8  |
| 22 Y22D7AL.5a | ISQVQDIVPALELANK                | 31  | 1723  | 1.32 | 0.19 | 14 |
| 22 Y22D7AL.5a | ISQVQDIVPALELANK                | 41  | 3244  | 1.32 | 0.21 | 16 |
| 7 Y22D7AL.5a  | RIEHITDEIEQSTSDYEK              | 55  | 10736 | 1.34 | 0.15 | 12 |
| 22 Y22D7AL.5a | DMGIATGATIFGDDSNLIK             | 17  | 3692  | 1.35 | 0.13 | 9  |
| 22 Y22D7AL.5a | RIEHITDEIEQSTSDYEK              | 49  | 12818 | 1.35 | 0.11 | 8  |
| 1 Y22D7AL.5a  | RIEHITDEIEQSTSDYEK              | 44  | 7101  | 1.36 | 0.11 | 8  |
| 22 Y22D7AL.5a | RIEHITDEIEQSTSDYEK              | 58  | 22241 | 1.36 | 0.11 | 8  |
| 1 Y22D7AL.5a  | ALTQPIATIVK                     | 15  | 1037  | 1.37 | 0.10 | 7  |
| 10 Y22D7AL.5a | VGTTGVITVK                      | 94  | 8122  | 1.37 | 0.10 | 7  |
| 22 Y22D7AL.5a | IEDITANDLGEVDEV TITK            | 85  | 4673  | 1.37 | 0.16 | 11 |
| 1 Y22D7AL.5a  | VGLQVVAIK                       | 74  | 2052  | 1.37 | 0.18 | 13 |
| 7 Y22D7AL.5a  | ISQVQDIVPALELANK                | 53  | 3046  | 1.39 | 0.30 | 21 |
| 22 Y22D7AL.5a | ALTQPIATIVK                     | 13  | 2666  | 1.39 | 0.12 | 8  |
| 22 Y22D7AL.5a | VGLQVVAIK                       | 57  | 3964  | 1.40 | 0.10 | 7  |
| 10 Y22D7AL.5a | APGFGDNRK                       | 21  | 4838  | 1.40 | 0.29 | 21 |
| 1 Y22D7AL.5a  | ALVLLSEK                        | 56  | 2703  | 1.40 | 0.06 | 4  |
| 1 Y22D7AL.5a  | GRNVIIQSWGSPK                   | 55  | 1090  | 1.40 | 0.08 | 6  |
| 10 Y22D7AL.5a | ALTQPIATIVK                     | 16  | 806   | 1.40 | 0.14 | 10 |
| 1 Y22D7AL.5a  | VGLQVVAIK                       | 49  | 1671  | 1.40 | 0.17 | 12 |
| 7 Y22D7AL.5a  | VGTTGVITVK                      | 77  | 8888  | 1.41 | 0.12 | 9  |
| 22 Y22D7AL.5a | DMGIATGATIFGDDSNLIK             | 33  | 2350  | 1.41 | 0.18 | 12 |
| 22 Y22D7AL.5a | IEDITANDLGEVDEV TITK            | 13  | 2212  | 1.42 | 0.41 | 29 |
| 1 Y22D7AL.5a  | VGLQVVAIK                       | 66  | 2086  | 1.42 | 0.08 | 6  |
| 7 Y22D7AL.5a  | VGTTGVITVK                      | 63  | 1967  | 1.42 | 0.13 | 9  |
| 22 Y22D7AL.5a | ALTQPIATIVK                     | 14  | 1663  | 1.43 | 0.16 | 11 |
| 22 Y22D7AL.5a | VGLQVVAIK                       | 69  | 3374  | 1.43 | 0.07 | 5  |
| 7 Y22D7AL.5a  | FVDMFEAGIIDPTK                  | 29  | 2238  | 1.43 | 0.10 | 7  |
| 7 Y22D7AL.5a  | GRNVIIQSWGSPK                   | 92  | 6995  | 1.44 | 0.08 | 6  |
| 7 Y22D7AL.5a  | VGLQVVAIK                       | 34  | 2095  | 1.44 | 0.15 | 10 |
| 10 Y22D7AL.5a | GRNVIIQSWGSPK                   | 51  | 2855  | 1.45 | 0.13 | 9  |
| 7 Y22D7AL.5a  | DMGIATGATIFGDDSNLIK             | 94  | 1001  | 1.46 | 0.11 | 7  |

|                                              |                             |    |       |      |      |     |
|----------------------------------------------|-----------------------------|----|-------|------|------|-----|
| 22 Y22D7AL.5a                                | IEDITANDLGEVDEVITITK        | 39 | 2138  | 1.47 | 0.19 | 13  |
| 1 Y22D7AL.5a                                 | ALTQPIATIVK                 | 15 | 1718  | 1.47 | 0.15 | 10  |
| 1 Y22D7AL.5a                                 | ALVLLSEK                    | 43 | 2662  | 1.47 | 0.17 | 12  |
| 1 Y22D7AL.5a                                 | ALVLLSEK                    | 17 | 1287  | 1.47 | 0.10 | 7   |
| 10 Y22D7AL.5a                                | RIEHITDEIEQSTSDYEK          | 38 | 7883  | 1.48 | 0.07 | 5   |
| 7 Y22D7AL.5a                                 | YQNLGAK                     | 20 | 4040  | 1.51 | 0.12 | 8   |
| 22 Y22D7AL.5a                                | DMGIATGATIFGDDSNLIK         | 87 | 1650  | 1.51 | 0.21 | 14  |
| 22 Y22D7AL.5a                                | ALVLLSEK                    | 15 | 1163  | 1.52 | 0.06 | 4   |
| 7 Y22D7AL.5a                                 | GRNVIIEQSWGSPK              | 37 | 802   | 1.54 | 0.12 | 8   |
| 7 Y22D7AL.5a                                 | TLNDELELIEGMK               | 20 | 758   | 1.55 | 0.19 | 13  |
| 1 Y22D7AL.5a                                 | ALVLLSEK                    | 32 | 3681  | 1.56 | 0.13 | 8   |
| 1 Y22D7AL.5a                                 | ALVLLSEK                    | 20 | 1409  | 1.58 | 0.28 | 17  |
| 10 Y22D7AL.5a                                | ALVLLSEK                    | 26 | 997   | 1.59 | 0.16 | 10  |
| 10 Y22D7AL.5a                                | VGTTGVITVK                  | 80 | 5949  | 1.59 | 0.08 | 5   |
| 22 Y22D7AL.5a                                | ISQVQDIVPALELANK            | 78 | 4127  | 1.60 | 0.21 | 13  |
| 22 Y22D7AL.5a                                | FGAEGRQAMLVGVNLLADAVSVTMGPK | 32 | 1732  | 1.61 | 0.21 | 13  |
| 10 Y22D7AL.5a                                | GRNVIIEQSWGSPK              | 87 | 2987  | 1.62 | 0.10 | 6   |
| 7 Y22D7AL.5a                                 | VGTTGVITVK                  | 54 | 4558  | 1.64 | 0.24 | 14  |
| 10 Y22D7AL.5a                                | GRNVIIEQSWGSPK              | 45 | 1998  | 1.65 | 0.11 | 7   |
| 22 Y22D7AL.5a                                | APGFGDNRK                   | 35 | 12379 | 1.65 | 0.23 | 14  |
| 22 Y22D7AL.5a                                | FVDMFEAGIIDPTK              | 57 | 2148  | 1.67 | 0.14 | 9   |
| 22 Y22D7AL.5a                                | YQNLGAK                     | 19 | 3118  | 1.68 | 0.10 | 6   |
| 7 Y22D7AL.5a                                 | GRNVIIEQSWGSPK              | 84 | 6109  | 1.68 | 0.05 | 3   |
| 22 Y22D7AL.5a                                | ALVLLSEK                    | 27 | 1068  | 1.69 | 0.14 | 8   |
| 1 Y22D7AL.5a                                 | GRNVIIEQSWGSPK              | 57 | 684   | 1.69 | 0.17 | 10  |
| 22 Y22D7AL.5a                                | VGLQVVAIK                   | 80 | 8223  | 1.74 | 0.04 | 2   |
| 22 Y22D7AL.5a                                | FVDMFEAGIIDPTK              | 51 | 1821  | 1.75 | 0.15 | 8   |
| 22 Y22D7AL.5a                                | VGLQVVAIK                   | 83 | 10969 | 1.77 | 0.08 | 5   |
| 22 Y22D7AL.5a                                | FGAEGRQAMLVGVNLLADAVSVTMGPK | 31 | 1802  | 1.79 | 0.10 | 5   |
| 10 Y22D7AL.5a                                | VGTTGVITVK                  | 37 | 1889  | 1.83 | 0.14 | 8   |
| 22 Y22D7AL.5a                                | VGTTGVITVK                  | 69 | 6294  | 1.86 | 0.16 | 9   |
| 22 Y22D7AL.5a                                | VGTTGVITVK                  | 97 | 9817  | 1.88 | 0.11 | 6   |
| 22 Y22D7AL.5a                                | GRNVIIEQSWGSPK              | 99 | 7763  | 1.90 | 0.10 | 5   |
| 10 Y22D7AL.5a                                | GRNVIIEQSWGSPK              | 69 | 2110  | 1.92 | 0.17 | 9   |
| 10 Y22D7AL.5a                                | VGLQVVAIK                   | 84 | 8293  | 1.97 | 0.10 | 5   |
| 10 Y22D7AL.5a                                | GRNVIIEQSWGSPK              | 90 | 8177  | 2.04 | 0.10 | 5   |
| 7 Y22D7AL.5a                                 | APGFGDNRK                   | 29 | 3504  | 2.05 | 0.05 | 2   |
| 22 Y22D7AL.5a                                | GRNVIIEQSWGSPK              | 72 | 5538  | 2.10 | 0.08 | 4   |
| 10 Y22D7AL.5a                                | VGLQVVAIK                   | 89 | 5655  | 2.11 | 0.07 | 3   |
| 10 Y22D7AL.5a                                | GRNVIIEQSWGSPK              | 71 | 6174  | 2.14 | 0.08 | 4   |
| 1 Y22D7AL.5a                                 | ALVLLSEK                    | 13 | 2751  | 2.15 | 0.11 | 5   |
| 22 Y22D7AL.5a                                | ALVLLSEK                    | 15 | 1149  | 2.21 | 0.17 | 8   |
| 22 Y22D7AL.5a                                | FVDMFEAGIIDPTK              | 14 | 308   | 2.27 | 0.07 | 3   |
| 22 Y22D7AL.5a                                | ISQVQDIVPALELANK            | 19 | 2049  | 2.29 | 0.19 | 8   |
| 1 Y22D7AL.5a                                 | ALVLLSEK                    | 24 | 1255  | 2.46 | 0.23 | 9   |
| 1 Y22D7AL.5a                                 | GRNVIIEQSWGSPK              | 69 | 4883  | 3.15 | 0.13 | 4   |
| 1 Y22D7AL.5a                                 | GRNVIIEQSWGSPK              | 66 | 3446  | 3.91 | 0.08 | 2   |
| 7 Y22D7AL.5a                                 | VGLQVVAIK                   | 51 | 1253  | 5.14 | 0.21 | 4   |
| 7 Y22D7AL.5a                                 | VGLQVVAIK                   | 52 | 1737  | 6.28 | 0.18 | 3   |
| 7 Y22D7AL.5a                                 | VGLQVVAIK                   | 46 | 1797  | 6.75 | 0.29 | 4   |
| 7 Y22D7AL.5a                                 | VGLQVVAIK                   | 39 | 1480  | 8.00 | 0.25 | 3   |
| 7 Y22D7AL.5a                                 | VGLQVVAIK                   | 47 | 1559  | 9.33 | 0.16 | 2   |
| 1 Y23H5A.7b;Y23H5A.7a                        | LVPEAYGEDSEQLLK             | 40 | 863   | 0.17 | 0.40 | 243 |
| 1 Y23H5A.7b;Y23H5A.7a                        | DVRDHSVFDDLAK               | 18 | 2390  | 0.17 | 0.27 | 154 |
| 1 Y23H5A.7b;Y23H5A.7a                        | DVRDHSVFDDLAK               | 24 | 2048  | 0.24 | 0.32 | 134 |
| 1 Y23H5A.7b;Y23H5A.7a                        | FDERGVPTHLADGTEITK          | 24 | 2169  | 0.30 | 0.21 | 69  |
| 10 Y23H5A.7b;Y23H5A.7a                       | LVPEAYGEDSEQLLK             | 22 | 1248  | 0.62 | 0.20 | 33  |
| 7 Y23H5A.7b;Y23H5A.7a                        | DVRDHSVFDDLAK               | 14 | 3785  | 0.74 | 0.08 | 10  |
| 7 Y23H5A.7b;Y23H5A.7a                        | LVPEAYGEDSEQLLK             | 37 | 1109  | 0.76 | 0.17 | 23  |
| 22 Y23H5A.7b;Y23H5A.7a                       | LVPEAYGEDSEQLLK             | 30 | 2414  | 0.77 | 0.21 | 27  |
| 22 Y23H5A.7b;Y23H5A.7a                       | TLTELGVRLDRNGQTVVK          | 11 | 6013  | 0.83 | 0.28 | 34  |
| 10 Y23H5A.7b;Y23H5A.7a                       | LVPEAYGEDSEQLLK             | 43 | 2984  | 0.85 | 0.19 | 22  |
| 22 Y23H5A.7b;Y23H5A.7a                       | LVPEAYGEDSEQLLK             | 35 | 3167  | 0.89 | 0.14 | 15  |
| 7 Y23H5A.7b;Y23H5A.7a                        | LVPEAYGEDSEQLLK             | 39 | 850   | 0.91 | 0.19 | 21  |
| 10 Y23H5A.7b;Y23H5A.7a                       | LVPEAYGEDSEQLLK             | 25 | 2959  | 0.92 | 0.23 | 25  |
| 7 Y23H5A.7b;Y23H5A.7a                        | DVRDHSVFDDLAK               | 11 | 3508  | 0.93 | 0.15 | 16  |
| 22 Y23H5A.7b;Y23H5A.7a                       | RSPNDFALWK                  | 25 | 2997  | 0.98 | 0.21 | 21  |
| 7 Y23H5A.7b;Y23H5A.7a                        | LVPEAYGEDSEQLLK             | 44 | 932   | 1.02 | 0.15 | 15  |
| 22 Y23H5A.7b;Y23H5A.7a                       | RSPNDFALWK                  | 18 | 3619  | 1.02 | 0.22 | 21  |
| 7 Y23H5A.7b;Y23H5A.7a                        | DVRDHSVFDDLAK               | 18 | 6439  | 1.05 | 0.14 | 14  |
| 22 Y23H5A.7b;Y23H5A.7a                       | DVRDHSVFDDLAK               | 15 | 10215 | 1.12 | 0.20 | 18  |
| 22 Y23H5A.7b;Y23H5A.7a                       | LDIHAGGFDLK                 | 18 | 1277  | 1.13 | 0.24 | 21  |
| 10 Y23H5A.7b;Y23H5A.7a                       | LDIHAGGFDLK                 | 26 | 2291  | 1.13 | 0.10 | 9   |
| 10 Y23H5A.7b;Y23H5A.7a                       | MFEVMIK                     | 34 | 1539  | 1.13 | 0.13 | 12  |
| 22 Y23H5A.7b;Y23H5A.7a                       | MFEVMIK                     | 17 | 895   | 1.23 | 0.15 | 12  |
| 10 Y23H5A.7b;Y23H5A.7a                       | RSPNDFALWK                  | 27 | 3524  | 1.23 | 0.13 | 11  |
| 10 Y23H5A.7b;Y23H5A.7a                       | LDIHAGGFDLK                 | 27 | 2895  | 1.25 | 0.19 | 15  |
| 7 Y23H5A.7b;Y23H5A.7a                        | RSPNDFALWK                  | 26 | 1321  | 1.28 | 0.25 | 19  |
| 7 Y23H5A.7b;Y23H5A.7a                        | MFEVMIK                     | 14 | 1067  | 1.62 | 0.05 | 3   |
| 22 Y23H5A.7b;Y23H5A.7a                       | MFEVMIK                     | 12 | 1100  | 1.66 | 0.09 | 5   |
| 1 Y23H5A.7b;Y23H5A.7a                        | IKPEELFK                    | 13 | 823   | 2.24 | 0.33 | 15  |
| 1 Y23H5A.7b;Y23H5A.7a                        | DVRDHSVFDDLAK               | 10 | 3019  | 2.61 | 0.21 | 8   |
| 10 Y23H5A.7b;Y23H5A.7a                       | VRLIAK                      | 14 | 1788  | 2.93 | 0.32 | 11  |
| 1 Y23H5A.7b;Y23H5A.7a                        | NFITIRK                     | 17 | 1551  | 3.47 | 0.23 | 7   |
| 10 Y24D9A.4a;Y24D9A.4c;Y73B3A.18a;Y73B3A.18b | DVTRFVK                     | 12 | 31440 | 0.40 | 0.10 | 26  |
| 1 Y24D9A.4a;Y24D9A.4c;Y73B3A.18a;Y73B3A.18b  | LVETVNNNFSEERHEEIRK         | 26 | 5946  | 0.43 | 0.21 | 47  |
| 10 Y24D9A.4a;Y24D9A.4c;Y73B3A.18a;Y73B3A.18b | TTAAVALVDVNPEDK             | 21 | 6994  | 0.45 | 0.10 | 23  |
| 1 Y24D9A.4a;Y24D9A.4c;Y73B3A.18a;Y73B3A.18b  | LVETVNNNFSEERHEEIRK         | 27 | 1797  | 0.47 | 0.23 | 49  |
| 10 Y24D9A.4a;Y24D9A.4c;Y73B3A.18a;Y73B3A.18b | TTAAVALVDVNPEDK             | 18 | 6716  | 0.50 | 0.10 | 21  |
| 1 Y24D9A.4a;Y24D9A.4c;Y73B3A.18a;Y73B3A.18b  | RARNFNIGQDIQPK              | 18 | 6590  | 0.52 | 0.11 | 22  |
| 1 Y24D9A.4a;Y24D9A.4c;Y73B3A.18a;Y73B3A.18b  | LVETVNNNFSEERHEEIRK         | 12 | 6630  | 0.59 | 0.22 | 37  |
| 10 Y24D9A.4a;Y24D9A.4c;Y73B3A.18a;Y73B3A.18b | YNVPYAIK                    | 21 | 3971  | 0.64 | 0.05 | 9   |
| 1 Y24D9A.4a;Y24D9A.4c;Y73B3A.18a;Y73B3A.18b  | RARNFNIGQDIQPK              | 12 | 19260 | 0.64 | 0.15 | 23  |
| 10 Y24D9A.4a;Y24D9A.4c;Y73B3A.18a;Y73B3A.18b | YNVPYAIK                    | 28 | 4753  | 0.70 | 0.08 | 12  |
| 10 Y24D9A.4a;Y24D9A.4c;Y73B3A.18a;Y73B3A.18b | TTAAVALVDVNPEDK             | 93 | 9057  | 0.72 | 0.11 | 16  |
| 10 Y24D9A.4a;Y24D9A.4c;Y73B3A.18a;Y73B3A.18b | TTAAVALVDVNPEDK             | 66 | 9806  | 0.73 | 0.09 | 13  |
| 1 Y24D9A.4a;Y24D9A.4c;Y73B3A.18a;Y73B3A.18b  | VAAVPAHIRAQTVQVK            | 12 | 14967 | 0.80 | 0.14 | 18  |
| 10 Y24D9A.4a;Y24D9A.4c;Y73B3A.18a;Y73B3A.18b | DVTRFVK                     | 16 | 22199 | 0.83 | 0.19 | 23  |
| 1 Y24D9A.4a;Y24D9A.4c;Y73B3A.18a;Y73B3A.18b  | RARNFNIGQDIQPK              | 19 | 5860  | 0.91 | 0.19 | 20  |
| 10 Y24D9A.4a;Y24D9A.4c;Y73B3A.18a;Y73B3A.18b | YIRLQRQSAILQK               | 15 | 31453 | 0.92 | 0.14 | 15  |
| 10 Y24D9A.4a;Y24D9A.4c;Y73B3A.18a;Y73B3A.18b | YIRLQRQSAILQK               | 14 | 36453 | 0.93 | 0.18 | 19  |

|    |                                           |                        |    |       |      |      |    |
|----|-------------------------------------------|------------------------|----|-------|------|------|----|
| 1  | Y24D9A.4a;Y24D9A.4c;Y73B3A.18a;Y73B3A.18b | RARNFNIGQDIQPK         | 17 | 11887 | 0.97 | 0.16 | 16 |
| 1  | Y24D9A.4a;Y24D9A.4c;Y73B3A.18a;Y73B3A.18b | RARNFNIGQDIQPK         | 18 | 6626  | 0.97 | 0.23 | 23 |
| 1  | Y24D9A.4a;Y24D9A.4c;Y73B3A.18a;Y73B3A.18b | RARNFNIGQDIQPK         | 23 | 8084  | 1.05 | 0.15 | 14 |
| 10 | Y24D9A.4a;Y24D9A.4c;Y73B3A.18a;Y73B3A.18b | RARNFNIGQDIQPK         | 36 | 52395 | 1.05 | 0.16 | 15 |
| 1  | Y24D9A.4a;Y24D9A.4c;Y73B3A.18a;Y73B3A.18b | RARNFNIGQDIQPK         | 16 | 5794  | 1.11 | 0.18 | 17 |
| 1  | Y24D9A.4a;Y24D9A.4c;Y73B3A.18a;Y73B3A.18b | TTAAVALVDVNPEDK        | 23 | 2033  | 1.13 | 0.18 | 16 |
| 10 | Y24D9A.4a;Y24D9A.4c;Y73B3A.18a;Y73B3A.18b | RARNFNIGQDIQPK         | 19 | 20440 | 1.20 | 0.07 | 5  |
| 10 | Y24D9A.4a;Y24D9A.4c;Y73B3A.18a;Y73B3A.18b | VPPTINQFRTALDSQSARQAFK | 12 | 20443 | 1.21 | 0.26 | 22 |
| 1  | Y24D9A.4a;Y24D9A.4c;Y73B3A.18a;Y73B3A.18b | TTAAVALVDVNPEDK        | 21 | 1709  | 1.23 | 0.16 | 13 |
| 1  | Y24D9A.4a;Y24D9A.4c;Y73B3A.18a;Y73B3A.18b | HWGGGVMSAK             | 10 | 14461 | 1.30 | 0.23 | 17 |
| 10 | Y24D9A.4a;Y24D9A.4c;Y73B3A.18a;Y73B3A.18b | RARNFNIGQDIQPK         | 20 | 33567 | 1.31 | 0.12 | 9  |
| 1  | Y24D9A.4a;Y24D9A.4c;Y73B3A.18a;Y73B3A.18b | TTAAVALVDVNPEDK        | 25 | 1541  | 1.36 | 0.12 | 9  |
| 10 | Y24D9A.4a;Y24D9A.4c;Y73B3A.18a;Y73B3A.18b | RARNFNIGQDIQPK         | 38 | 27093 | 1.37 | 0.17 | 12 |
| 10 | Y24D9A.4a;Y24D9A.4c;Y73B3A.18a;Y73B3A.18b | RARNFNIGQDIQPK         | 22 | 14362 | 1.38 | 0.30 | 22 |
| 1  | Y24D9A.4a;Y24D9A.4c;Y73B3A.18a;Y73B3A.18b | RARNFNIGQDIQPK         | 29 | 7283  | 1.40 | 0.12 | 8  |
| 1  | Y24D9A.4a;Y24D9A.4c;Y73B3A.18a;Y73B3A.18b | VAAVPAHIRAQTQVQK       | 17 | 7771  | 1.43 | 0.50 | 35 |
| 10 | Y24D9A.4a;Y24D9A.4c;Y73B3A.18a;Y73B3A.18b | YIRLQRQSAILQK          | 10 | 12622 | 1.50 | 0.21 | 14 |
| 1  | Y24D9A.4a;Y24D9A.4c;Y73B3A.18a;Y73B3A.18b | RARNFNIGQDIQPK         | 14 | 12999 | 1.53 | 0.23 | 15 |
| 10 | Y24D9A.4a;Y24D9A.4c;Y73B3A.18a;Y73B3A.18b | VAAVPAHIRAQTQVQK       | 11 | 26937 | 1.57 | 0.17 | 11 |
| 1  | Y24D9A.4a;Y24D9A.4c;Y73B3A.18a;Y73B3A.18b | VAAVPAHIRAQTQVQK       | 13 | 25449 | 1.71 | 0.26 | 15 |
| 10 | Y24D9A.4a;Y24D9A.4c;Y73B3A.18a;Y73B3A.18b | HWGGGVMSAK             | 42 | 11240 | 1.75 | 0.20 | 12 |
| 10 | Y24D9A.4a;Y24D9A.4c;Y73B3A.18a;Y73B3A.18b | HWGGGVMSAK             | 24 | 18683 | 1.81 | 0.13 | 7  |
| 10 | Y24D9A.4a;Y24D9A.4c;Y73B3A.18a;Y73B3A.18b | TTAAVALVDVNPEDK        | 31 | 3337  | 1.83 | 0.12 | 6  |
| 10 | Y24D9A.4a;Y24D9A.4c;Y73B3A.18a;Y73B3A.18b | HWGGGVMSAK             | 19 | 20697 | 1.83 | 0.10 | 6  |
| 10 | Y24D9A.4a;Y24D9A.4c;Y73B3A.18a;Y73B3A.18b | HWGGGVMSAK             | 17 | 9658  | 1.89 | 0.10 | 5  |
| 10 | Y24D9A.4a;Y24D9A.4c;Y73B3A.18a;Y73B3A.18b | TTAAVALVDVNPEDK        | 41 | 4355  | 1.90 | 0.07 | 4  |
| 1  | Y24D9A.4a;Y24D9A.4c;Y73B3A.18a;Y73B3A.18b | HWGGGVMSAK             | 17 | 2600  | 1.91 | 0.16 | 8  |
| 10 | Y24D9A.4a;Y24D9A.4c;Y73B3A.18a;Y73B3A.18b | RARNFNIGQDIQPK         | 13 | 21998 | 1.95 | 0.08 | 4  |
| 1  | Y24D9A.4a;Y24D9A.4c;Y73B3A.18a;Y73B3A.18b | HWGGGVMSAK             | 28 | 3823  | 2.11 | 0.04 | 2  |
| 10 | Y24D9A.4a;Y24D9A.4c;Y73B3A.18a;Y73B3A.18b | HWGGGVMSAK             | 33 | 28885 | 2.19 | 0.11 | 5  |
| 10 | Y24D9A.4a;Y24D9A.4c;Y73B3A.18a;Y73B3A.18b | YIRLQRQSAILQK          | 14 | 10372 | 2.34 | 0.14 | 6  |
| 10 | Y24D9A.4a;Y24D9A.4c;Y73B3A.18a;Y73B3A.18b | TTAAVALVDVNPEDK        | 61 | 5478  | 2.35 | 0.08 | 3  |
| 10 | Y24D9A.4a;Y24D9A.4c;Y73B3A.18a;Y73B3A.18b | HWGGGVMSAK             | 31 | 33356 | 2.37 | 0.22 | 9  |
| 10 | Y24D9A.4a;Y24D9A.4c;Y73B3A.18a;Y73B3A.18b | RARNFNIGQDIQPK         | 20 | 12955 | 2.41 | 0.24 | 10 |
| 10 | Y24D9A.4a;Y24D9A.4c;Y73B3A.18a;Y73B3A.18b | TTAAVALVDVNPEDK        | 15 | 4354  | 2.53 | 0.09 | 3  |
| 10 | Y24D9A.4a;Y24D9A.4c;Y73B3A.18a;Y73B3A.18b | HWGGGVMSAK             | 15 | 21735 | 2.54 | 0.05 | 2  |
| 1  | Y24D9A.4a;Y24D9A.4c;Y73B3A.18a;Y73B3A.18b | HWGGGVMSAK             | 24 | 16602 | 2.57 | 0.25 | 10 |
| 10 | Y24D9A.4a;Y24D9A.4c;Y73B3A.18a;Y73B3A.18b | HWGGGVMSAK             | 29 | 26527 | 2.75 | 0.14 | 5  |
| 10 | Y24D9A.4a;Y24D9A.4c;Y73B3A.18a;Y73B3A.18b | RARNFNIGQDIQPK         | 22 | 10139 | 3.29 | 0.14 | 4  |
| 10 | Y24D9A.4a;Y24D9A.4c;Y73B3A.18a;Y73B3A.18b | RARNFNIGQDIQPK         | 20 | 12042 | 3.48 | 0.30 | 9  |
| 1  | Y24D9A.4a;Y24D9A.4c;Y73B3A.18a;Y73B3A.18b | HWGGGVMSAK             | 26 | 3719  | 4.33 | 0.07 | 2  |
| 1  | Y24D9A.4a;Y24D9A.4c;Y73B3A.18a;Y73B3A.18b | HWGGGVMSAK             | 32 | 4968  | 4.95 | 0.14 | 3  |
| 22 | Y24D9A.4a;Y24D9A.4c;Y73B3A.18b            | YNVPYAIK               | 23 | 3527  | 0.41 | 0.10 | 25 |
| 22 | Y24D9A.4a;Y24D9A.4c;Y73B3A.18b            | TTAAVALVDVNPEDK        | 33 | 1480  | 0.51 | 0.22 | 43 |
| 22 | Y24D9A.4a;Y24D9A.4c;Y73B3A.18b            | DVTRFVK                | 21 | 18728 | 0.59 | 0.14 | 24 |
| 22 | Y24D9A.4a;Y24D9A.4c;Y73B3A.18b            | YNVPYAIK               | 28 | 5085  | 0.63 | 0.09 | 14 |
| 22 | Y24D9A.4a;Y24D9A.4c;Y73B3A.18b            | YNVPYAIK               | 21 | 4173  | 0.64 | 0.21 | 32 |
| 22 | Y24D9A.4a;Y24D9A.4c;Y73B3A.18b            | YNVPYAIK               | 25 | 5867  | 0.66 | 0.24 | 36 |
| 22 | Y24D9A.4a;Y24D9A.4c;Y73B3A.18b            | VAAVPAHIRAQTQVQK       | 19 | 64862 | 0.66 | 0.31 | 46 |
| 22 | Y24D9A.4a;Y24D9A.4c;Y73B3A.18b            | DVTRFVK                | 17 | 24384 | 0.81 | 0.17 | 21 |
| 22 | Y24D9A.4a;Y24D9A.4c;Y73B3A.18b            | RARNFNIGQDIQPK         | 20 | 18009 | 0.82 | 0.26 | 32 |
| 22 | Y24D9A.4a;Y24D9A.4c;Y73B3A.18b            | VAAVPAHIRAQTQVQK       | 18 | 56315 | 0.84 | 0.39 | 47 |
| 22 | Y24D9A.4a;Y24D9A.4c;Y73B3A.18b            | YNVPYAIK               | 22 | 3760  | 0.86 | 0.11 | 13 |
| 22 | Y24D9A.4a;Y24D9A.4c;Y73B3A.18b            | LVETVNNNFSEHIEIRK      | 12 | 3201  | 0.95 | 0.43 | 45 |
| 22 | Y24D9A.4a;Y24D9A.4c;Y73B3A.18b            | LVETVNNNFSEHIEIRK      | 28 | 3262  | 0.97 | 0.13 | 14 |
| 22 | Y24D9A.4a;Y24D9A.4c;Y73B3A.18b            | LVETVNNNFSEHIEIRK      | 17 | 4417  | 1.00 | 0.20 | 20 |
| 22 | Y24D9A.4a;Y24D9A.4c;Y73B3A.18b            | RARNFNIGQDIQPK         | 21 | 30216 | 1.16 | 0.27 | 23 |
| 22 | Y24D9A.4a;Y24D9A.4c;Y73B3A.18b            | RARNFNIGQDIQPK         | 17 | 4425  | 1.17 | 0.19 | 16 |
| 22 | Y24D9A.4a;Y24D9A.4c;Y73B3A.18b            | VAAVPAHIRAQTQVQK       | 11 | 9303  | 1.18 | 0.13 | 11 |
| 22 | Y24D9A.4a;Y24D9A.4c;Y73B3A.18b            | RARNFNIGQDIQPK         | 14 | 12627 | 1.48 | 0.09 | 6  |
| 22 | Y24D9A.4a;Y24D9A.4c;Y73B3A.18b            | VAAVPAHIRAQTQVQK       | 11 | 9544  | 1.49 | 0.33 | 22 |
| 22 | Y24D9A.4a;Y24D9A.4c;Y73B3A.18b            | VPPTINQFRTALDSQSARQAFK | 11 | 4917  | 1.50 | 0.33 | 22 |
| 22 | Y24D9A.4a;Y24D9A.4c;Y73B3A.18b            | TTAAVALVDVNPEDK        | 20 | 2101  | 1.54 | 0.06 | 4  |
| 22 | Y24D9A.4a;Y24D9A.4c;Y73B3A.18b            | HWGGGVMSAK             | 21 | 24968 | 1.56 | 0.15 | 10 |
| 22 | Y24D9A.4a;Y24D9A.4c;Y73B3A.18b            | YIRLQRQSAILQK          | 12 | 8297  | 1.57 | 0.11 | 7  |
| 22 | Y24D9A.4a;Y24D9A.4c;Y73B3A.18b            | TTAAVALVDVNPEDK        | 48 | 2753  | 1.58 | 0.23 | 14 |
| 22 | Y24D9A.4a;Y24D9A.4c;Y73B3A.18b            | TTAAVALVDVNPEDK        | 36 | 4975  | 1.58 | 0.13 | 8  |
| 22 | Y24D9A.4a;Y24D9A.4c;Y73B3A.18b            | RARNFNIGQDIQPK         | 30 | 14861 | 1.64 | 0.17 | 10 |
| 22 | Y24D9A.4a;Y24D9A.4c;Y73B3A.18b            | RARNFNIGQDIQPK         | 31 | 17361 | 1.75 | 0.13 | 8  |
| 22 | Y24D9A.4a;Y24D9A.4c;Y73B3A.18b            | DVTRFVK                | 21 | 15314 | 1.82 | 0.16 | 9  |
| 22 | Y24D9A.4a;Y24D9A.4c;Y73B3A.18b            | YIRLQRQSAILQK          | 10 | 11817 | 1.86 | 0.11 | 6  |
| 22 | Y24D9A.4a;Y24D9A.4c;Y73B3A.18b            | RARNFNIGQDIQPK         | 32 | 30242 | 1.97 | 0.33 | 16 |
| 22 | Y24D9A.4a;Y24D9A.4c;Y73B3A.18b            | RARNFNIGQDIQPK         | 26 | 4982  | 2.02 | 0.14 | 7  |
| 22 | Y24D9A.4a;Y24D9A.4c;Y73B3A.18b            | TTAAVALVDVNPEDK        | 33 | 1925  | 2.12 | 0.11 | 5  |
| 22 | Y24D9A.4a;Y24D9A.4c;Y73B3A.18b            | RARNFNIGQDIQPK         | 17 | 16270 | 2.19 | 0.21 | 9  |
| 22 | Y24D9A.4a;Y24D9A.4c;Y73B3A.18b            | RARNFNIGQDIQPK         | 18 | 8310  | 2.33 | 0.11 | 5  |
| 22 | Y24D9A.4a;Y24D9A.4c;Y73B3A.18b            | HWGGGVMSAK             | 21 | 3880  | 2.77 | 0.16 | 6  |
| 22 | Y24D9A.4a;Y24D9A.4c;Y73B3A.18b            | HWGGGVMSAK             | 11 | 9059  | 2.77 | 0.15 | 5  |
| 22 | Y24D9A.4a;Y24D9A.4c;Y73B3A.18b            | HWGGGVMSAK             | 19 | 5727  | 3.78 | 0.06 | 2  |
| 22 | Y24D9A.4a;Y24D9A.4c;Y73B3A.18b            | HWGGGVMSAK             | 33 | 7253  | 3.80 | 0.20 | 5  |
| 22 | Y24D9A.4a;Y24D9A.4c;Y73B3A.18b            | HWGGGVMSAK             | 21 | 17044 | 4.10 | 0.11 | 3  |
| 22 | Y24D9A.4a;Y24D9A.4c;Y73B3A.18b            | HWGGGVMSAK             | 22 | 7457  | 4.21 | 0.12 | 3  |
| 7  | Y24D9A.4c;Y73B3A.18b                      | TTAAVALVDVNPEDK        | 40 | 3043  | 0.56 | 0.07 | 12 |
| 7  | Y24D9A.4c;Y73B3A.18b                      | TTAAVALVDVNPEDK        | 25 | 1579  | 0.60 | 0.28 | 46 |
| 7  | Y24D9A.4c;Y73B3A.18b                      | TTAAVALVDVNPEDK        | 21 | 1443  | 0.65 | 0.09 | 15 |
| 7  | Y24D9A.4c;Y73B3A.18b                      | TTAAVALVDVNPEDK        | 33 | 2614  | 0.66 | 0.15 | 23 |
| 7  | Y24D9A.4c;Y73B3A.18b                      | TTAAVALVDVNPEDK        | 44 | 3911  | 0.73 | 0.24 | 33 |
| 7  | Y24D9A.4c;Y73B3A.18b                      | TTAAVALVDVNPEDK        | 16 | 1951  | 0.76 | 0.21 | 28 |
| 7  | Y24D9A.4c;Y73B3A.18b                      | TTAAVALVDVNPEDK        | 37 | 3539  | 0.89 | 0.13 | 14 |
| 7  | Y24D9A.4c;Y73B3A.18b                      | RARNFNIGQDIQPK         | 16 | 9257  | 1.01 | 0.23 | 23 |
| 7  | Y24D9A.4c;Y73B3A.18b                      | TTAAVALVDVNPEDK        | 20 | 1863  | 1.06 | 0.08 | 7  |
| 7  | Y24D9A.4c;Y73B3A.18b                      | RARNFNIGQDIQPK         | 25 | 18413 | 1.16 | 0.19 | 16 |
| 7  | Y24D9A.4c;Y73B3A.18b                      | TTAAVALVDVNPEDK        | 13 | 1731  | 1.18 | 0.23 | 20 |
| 7  | Y24D9A.4c;Y73B3A.18b                      | RARNFNIGQDIQPK         | 10 | 12334 | 1.41 | 0.10 | 7  |
| 7  | Y24D9A.4c;Y73B3A.18b                      | TTAAVALVDVNPEDK        | 43 | 3171  | 1.46 | 0.11 | 8  |
| 7  | Y24D9A.4c;Y73B3A.18b                      | HWGGGVMSAK             | 13 | 7369  | 2.60 | 0.09 | 3  |
| 7  | Y24D9A.4c;Y73B3A.18b                      | HWGGGVMSAK             | 15 | 3406  | 2.67 | 0.12 | 5  |
| 7  | Y24D9A.4c;Y73B3A.18b                      | HWGGGVMSAK             | 24 | 6997  | 2.79 | 0.08 | 3  |
| 7  | Y24D9A.4c;Y73B3A.18b                      | HWGGGVMSAK             | 12 | 3280  | 3.29 | 0.15 | 5  |
| 7  | Y24D9A.4c;Y73B3A.18b                      | HWGGGVMSAK             | 25 | 3235  | 4.33 | 0.09 | 2  |
| 7  | Y24D9A.4c;Y73B3A.18b                      | HWGGGVMSAK             | 36 | 4560  | 5.96 | 0.27 | 5  |

|                        |                     |     |       |      |      |     |
|------------------------|---------------------|-----|-------|------|------|-----|
| 7 Y24D9A.4c;Y73B3A.18b | HWGGGVMSAK          | 26  | 4896  | 6.62 | 0.36 | 5   |
| 7 Y24D9A.4c;Y73B3A.18b | HWGGGVMSAK          | 33  | 4341  | 7.26 | 0.29 | 4   |
| 7 Y24D9A.4c;Y73B3A.18b | HWGGGVMSAK          | 43  | 4501  | 8.54 | 0.29 | 3   |
| 10 Y24D9A.8a;Y24D9A.8b | DRILIK              | 13  | 8748  | 0.14 | 0.14 | 95  |
| 10 Y24D9A.8a;Y24D9A.8b | QLAAETELAPVVLSTSHAK | 94  | 4428  | 0.16 | 0.30 | 195 |
| 10 Y24D9A.8a;Y24D9A.8b | LASTWEGIRAAK        | 44  | 2768  | 0.18 | 0.32 | 178 |
| 10 Y24D9A.8a;Y24D9A.8b | TQVMAASFRNTEEIK     | 48  | 1998  | 0.23 | 0.40 | 172 |
| 10 Y24D9A.8a;Y24D9A.8b | TQVMAASFRNTEEIK     | 38  | 1982  | 0.28 | 0.25 | 88  |
| 10 Y24D9A.8a;Y24D9A.8b | TQVMAASFRNTEEIK     | 36  | 926   | 0.30 | 0.34 | 115 |
| 10 Y24D9A.8a;Y24D9A.8b | EFQPTDATTNPSLILAASK | 17  | 2709  | 0.31 | 0.30 | 100 |
| 10 Y24D9A.8a;Y24D9A.8b | GASVVVADTGDFNAIK    | 80  | 2240  | 0.31 | 0.21 | 66  |
| 22 Y24D9A.8a;Y24D9A.8b | QLAAETELAPVVLSTSHAK | 72  | 5799  | 0.32 | 0.17 | 54  |
| 10 Y24D9A.8a;Y24D9A.8b | DRILIK              | 12  | 8364  | 0.33 | 0.27 | 82  |
| 10 Y24D9A.8a;Y24D9A.8b | GASVVVADTGDFNAIK    | 115 | 2748  | 0.34 | 0.18 | 53  |
| 10 Y24D9A.8a;Y24D9A.8b | GASVVVADTGDFNAIK    | 36  | 1073  | 0.37 | 0.32 | 88  |
| 22 Y24D9A.8a;Y24D9A.8b | QLAAETELAPVVLSTSHAK | 88  | 6161  | 0.39 | 0.16 | 41  |
| 22 Y24D9A.8a;Y24D9A.8b | LAEGIRNFAK          | 21  | 5982  | 0.43 | 0.10 | 24  |
| 10 Y24D9A.8a;Y24D9A.8b | LASTWEGIRAAK        | 38  | 2580  | 0.43 | 0.54 | 125 |
| 22 Y24D9A.8a;Y24D9A.8b | GASVVVADTGDFNAIK    | 101 | 3156  | 0.45 | 0.08 | 18  |
| 22 Y24D9A.8a;Y24D9A.8b | LASTWEGIRAAK        | 66  | 3539  | 0.46 | 0.11 | 25  |
| 1 Y24D9A.8a;Y24D9A.8b  | LASTWEGIRAAK        | 17  | 1460  | 0.47 | 0.18 | 38  |
| 7 Y24D9A.8a;Y24D9A.8b  | MEQYAALIDQSVAYAK    | 112 | 3900  | 0.49 | 0.12 | 24  |
| 10 Y24D9A.8a;Y24D9A.8b | LAEGIRNFAK          | 20  | 4337  | 0.49 | 0.37 | 75  |
| 22 Y24D9A.8a;Y24D9A.8b | LASTWEGIRAAK        | 50  | 2535  | 0.50 | 0.22 | 44  |
| 10 Y24D9A.8a;Y24D9A.8b | LASTWEGIRAAK        | 65  | 5437  | 0.50 | 0.12 | 24  |
| 22 Y24D9A.8a;Y24D9A.8b | LAEGIRNFAK          | 24  | 7379  | 0.50 | 0.19 | 38  |
| 7 Y24D9A.8a;Y24D9A.8b  | GASVVVADTGDFNAIK    | 59  | 1521  | 0.53 | 0.38 | 71  |
| 22 Y24D9A.8a;Y24D9A.8b | LASTWEGIRAAK        | 47  | 5194  | 0.54 | 0.11 | 20  |
| 22 Y24D9A.8a;Y24D9A.8b | GASVVVADTGDFNAIK    | 72  | 3152  | 0.54 | 0.16 | 30  |
| 7 Y24D9A.8a;Y24D9A.8b  | LASTWEGIRAAK        | 30  | 4234  | 0.55 | 0.14 | 25  |
| 7 Y24D9A.8a;Y24D9A.8b  | MEQYAALIDQSVAYAK    | 101 | 5025  | 0.56 | 0.09 | 16  |
| 10 Y24D9A.8a;Y24D9A.8b | LASTWEGIRAAK        | 51  | 5222  | 0.58 | 0.17 | 29  |
| 22 Y24D9A.8a;Y24D9A.8b | LASTWEGIRAAK        | 55  | 5004  | 0.58 | 0.15 | 26  |
| 22 Y24D9A.8a;Y24D9A.8b | AFRWALNEDAMATEK     | 18  | 1956  | 0.58 | 0.20 | 35  |
| 22 Y24D9A.8a;Y24D9A.8b | TQVMAASFRNTEEIK     | 47  | 3630  | 0.62 | 0.17 | 27  |
| 22 Y24D9A.8a;Y24D9A.8b | LAEGIRNFAK          | 30  | 14097 | 0.62 | 0.19 | 31  |
| 7 Y24D9A.8a;Y24D9A.8b  | AFRWALNEDAMATEK     | 44  | 1755  | 0.62 | 0.09 | 15  |
| 1 Y24D9A.8a;Y24D9A.8b  | EFQPTDATTNPSLILAASK | 44  | 818   | 0.64 | 0.12 | 18  |
| 10 Y24D9A.8a;Y24D9A.8b | EFQPTDATTNPSLILAASK | 13  | 2702  | 0.65 | 0.43 | 66  |
| 10 Y24D9A.8a;Y24D9A.8b | LASTWEGIRAAK        | 16  | 1032  | 0.65 | 0.08 | 12  |
| 22 Y24D9A.8a;Y24D9A.8b | TQVMAASFRNTEEIK     | 34  | 1498  | 0.65 | 0.08 | 12  |
| 10 Y24D9A.8a;Y24D9A.8b | MEQYAALIDQSVAYAK    | 79  | 2175  | 0.66 | 0.11 | 16  |
| 22 Y24D9A.8a;Y24D9A.8b | LAEGIRNFAK          | 23  | 11512 | 0.66 | 0.14 | 21  |
| 1 Y24D9A.8a;Y24D9A.8b  | LASTWEGIRAAK        | 52  | 2135  | 0.67 | 0.13 | 20  |
| 22 Y24D9A.8a;Y24D9A.8b | GASVVVADTGDFNAIK    | 104 | 3720  | 0.69 | 0.11 | 16  |
| 22 Y24D9A.8a;Y24D9A.8b | LAEGIRNFAK          | 11  | 2805  | 0.69 | 0.18 | 27  |
| 1 Y24D9A.8a;Y24D9A.8b  | EFQPTDATTNPSLILAASK | 33  | 1085  | 0.70 | 0.23 | 33  |
| 7 Y24D9A.8a;Y24D9A.8b  | QLAAETELAPVVLSTSHAK | 81  | 2205  | 0.70 | 0.14 | 20  |
| 7 Y24D9A.8a;Y24D9A.8b  | GASVVVADTGDFNAIK    | 74  | 2561  | 0.72 | 0.15 | 21  |
| 7 Y24D9A.8a;Y24D9A.8b  | GASVVVADTGDFNAIK    | 85  | 3406  | 0.72 | 0.09 | 12  |
| 7 Y24D9A.8a;Y24D9A.8b  | TQVMAASFRNTEEIK     | 61  | 4957  | 0.73 | 0.16 | 21  |
| 1 Y24D9A.8a;Y24D9A.8b  | GASVVVADTGDFNAIK    | 58  | 913   | 0.75 | 0.19 | 26  |
| 7 Y24D9A.8a;Y24D9A.8b  | EFQPTDATTNPSLILAASK | 66  | 3101  | 0.76 | 0.14 | 19  |
| 10 Y24D9A.8a;Y24D9A.8b | LASTWEGIRAAK        | 68  | 3071  | 0.78 | 0.09 | 12  |
| 1 Y24D9A.8a;Y24D9A.8b  | MEQYAALIDQSVAYAK    | 79  | 1914  | 0.79 | 0.13 | 16  |
| 7 Y24D9A.8a;Y24D9A.8b  | QLAAETELAPVVLSTSHAK | 19  | 4478  | 0.80 | 0.17 | 22  |
| 22 Y24D9A.8a;Y24D9A.8b | MEQYAALIDQSVAYAK    | 100 | 3584  | 0.80 | 0.08 | 10  |
| 7 Y24D9A.8a;Y24D9A.8b  | MEQYAALIDQSVAYAK    | 82  | 1212  | 0.82 | 0.17 | 20  |
| 7 Y24D9A.8a;Y24D9A.8b  | MEQYAALIDQSVAYAK    | 63  | 1157  | 0.83 | 0.12 | 14  |
| 10 Y24D9A.8a;Y24D9A.8b | DDPGVVSVTRIFNYYK    | 19  | 3340  | 0.83 | 0.06 | 7   |
| 22 Y24D9A.8a;Y24D9A.8b | MEQYAALIDQSVAYAK    | 90  | 2187  | 0.84 | 0.21 | 25  |
| 1 Y24D9A.8a;Y24D9A.8b  | GASVVVADTGDFNAIK    | 66  | 1224  | 0.85 | 0.15 | 18  |
| 22 Y24D9A.8a;Y24D9A.8b | EFQPTDATTNPSLILAASK | 105 | 3528  | 0.87 | 0.12 | 14  |
| 10 Y24D9A.8a;Y24D9A.8b | LAEGIRNFAK          | 11  | 2077  | 0.87 | 0.11 | 13  |
| 1 Y24D9A.8a;Y24D9A.8b  | QLAAETELAPVVLSTSHAK | 95  | 2215  | 0.87 | 0.16 | 18  |
| 1 Y24D9A.8a;Y24D9A.8b  | GASVVVADTGDFNAIK    | 12  | 423   | 0.89 | 0.03 | 3   |
| 22 Y24D9A.8a;Y24D9A.8b | MEQYAALIDQSVAYAK    | 104 | 3249  | 0.89 | 0.10 | 11  |
| 22 Y24D9A.8a;Y24D9A.8b | TQVMAASFRNTEEIK     | 24  | 2554  | 0.90 | 0.09 | 11  |
| 22 Y24D9A.8a;Y24D9A.8b | LAEGIRNFAK          | 12  | 2147  | 0.92 | 0.21 | 23  |
| 10 Y24D9A.8a;Y24D9A.8b | GASVVVADTGDFNAIK    | 72  | 1880  | 0.95 | 0.14 | 15  |
| 22 Y24D9A.8a;Y24D9A.8b | EFQPTDATTNPSLILAASK | 73  | 3303  | 0.95 | 0.08 | 8   |
| 7 Y24D9A.8a;Y24D9A.8b  | LASTWEGIRAAK        | 45  | 4480  | 0.96 | 0.13 | 14  |
| 22 Y24D9A.8a;Y24D9A.8b | QLAAETELAPVVLSTSHAK | 21  | 3699  | 0.97 | 0.16 | 17  |
| 7 Y24D9A.8a;Y24D9A.8b  | LASTWEGIRAAK        | 37  | 3759  | 0.98 | 0.12 | 12  |
| 22 Y24D9A.8a;Y24D9A.8b | QLAAETELAPVVLSTSHAK | 21  | 4242  | 1.00 | 0.12 | 12  |
| 10 Y24D9A.8a;Y24D9A.8b | QLAAETELAPVVLSTSHAK | 11  | 3851  | 1.00 | 0.14 | 14  |
| 7 Y24D9A.8a;Y24D9A.8b  | LAEGIRNFAK          | 17  | 3473  | 1.00 | 0.27 | 27  |
| 7 Y24D9A.8a;Y24D9A.8b  | QLAAETELAPVVLSTSHAK | 18  | 4457  | 1.00 | 0.15 | 15  |
| 7 Y24D9A.8a;Y24D9A.8b  | LAEGIRNFAK          | 19  | 3714  | 1.03 | 0.16 | 16  |
| 10 Y24D9A.8a;Y24D9A.8b | LASTWEGIRAAK        | 57  | 4058  | 1.03 | 0.16 | 15  |
| 1 Y24D9A.8a;Y24D9A.8b  | QLAAETELAPVVLSTSHAK | 33  | 502   | 1.03 | 0.09 | 9   |
| 22 Y24D9A.8a;Y24D9A.8b | GASVVVADTGDFNAIK    | 38  | 1402  | 1.03 | 0.16 | 15  |
| 22 Y24D9A.8a;Y24D9A.8b | DDPGVVSVTRIFNYYK    | 24  | 5382  | 1.03 | 0.34 | 33  |
| 7 Y24D9A.8a;Y24D9A.8b  | GASVVVADTGDFNAIK    | 51  | 1461  | 1.04 | 0.16 | 16  |
| 7 Y24D9A.8a;Y24D9A.8b  | QLAAETELAPVVLSTSHAK | 15  | 3009  | 1.04 | 0.09 | 9   |
| 7 Y24D9A.8a;Y24D9A.8b  | QLAAETELAPVVLSTSHAK | 111 | 8434  | 1.05 | 0.10 | 10  |
| 7 Y24D9A.8a;Y24D9A.8b  | TQVMAASFRNTEEIK     | 48  | 4122  | 1.05 | 0.09 | 9   |
| 7 Y24D9A.8a;Y24D9A.8b  | GASVVVADTGDFNAIK    | 43  | 824   | 1.05 | 0.22 | 21  |
| 7 Y24D9A.8a;Y24D9A.8b  | TQVMAASFRNTEEIK     | 13  | 1344  | 1.06 | 0.19 | 18  |
| 7 Y24D9A.8a;Y24D9A.8b  | GASVVVADTGDFNAIK    | 69  | 1779  | 1.08 | 0.18 | 17  |
| 7 Y24D9A.8a;Y24D9A.8b  | QLAAETELAPVVLSTSHAK | 118 | 7141  | 1.08 | 0.19 | 18  |
| 22 Y24D9A.8a;Y24D9A.8b | QLAAETELAPVVLSTSHAK | 122 | 4794  | 1.08 | 0.15 | 14  |
| 1 Y24D9A.8a;Y24D9A.8b  | MEQYAALIDQSVAYAK    | 65  | 1469  | 1.08 | 0.12 | 11  |
| 10 Y24D9A.8a;Y24D9A.8b | GASVVVADTGDFNAIK    | 89  | 2151  | 1.08 | 0.12 | 11  |
| 1 Y24D9A.8a;Y24D9A.8b  | GASVVVADTGDFNAIK    | 107 | 1231  | 1.09 | 0.16 | 15  |
| 22 Y24D9A.8a;Y24D9A.8b | EFQPTDATTNPSLILAASK | 10  | 4003  | 1.09 | 0.33 | 30  |
| 1 Y24D9A.8a;Y24D9A.8b  | QLAAETELAPVVLSTSHAK | 82  | 3550  | 1.09 | 0.18 | 16  |
| 22 Y24D9A.8a;Y24D9A.8b | EFQPTDATTNPSLILAASK | 21  | 3086  | 1.10 | 0.19 | 18  |
| 1 Y24D9A.8a;Y24D9A.8b  | EFQPTDATTNPSLILAASK | 13  | 1987  | 1.11 | 0.30 | 27  |
| 10 Y24D9A.8a;Y24D9A.8b | EFQPTDATTNPSLILAASK | 84  | 4061  | 1.12 | 0.12 | 11  |
| 10 Y24D9A.8a;Y24D9A.8b | EFQPTDATTNPSLILAASK | 26  | 4725  | 1.12 | 0.07 | 6   |

|                        |                     |     |       |      |      |     |
|------------------------|---------------------|-----|-------|------|------|-----|
| 1 Y24D9A.8a;Y24D9A.8b  | QLAAETELAPVVLSTSHAK | 32  | 3013  | 1.12 | 0.15 | 13  |
| 1 Y24D9A.8a;Y24D9A.8b  | MEQYAALIDQSVAYAK    | 45  | 1258  | 1.13 | 0.20 | 18  |
| 1 Y24D9A.8a;Y24D9A.8b  | QLAAETELAPVVLSTSHAK | 85  | 1215  | 1.14 | 0.15 | 13  |
| 1 Y24D9A.8a;Y24D9A.8b  | MEQYAALIDQSVAYAK    | 110 | 1774  | 1.16 | 0.13 | 11  |
| 10 Y24D9A.8a;Y24D9A.8b | EFQPTDATTNPSLILAASK | 108 | 3746  | 1.18 | 0.14 | 12  |
| 7 Y24D9A.8a;Y24D9A.8b  | DRILIK              | 13  | 9068  | 1.20 | 0.08 | 7   |
| 7 Y24D9A.8a;Y24D9A.8b  | TQVMAASFRNTEEIK     | 33  | 1469  | 1.22 | 0.11 | 9   |
| 7 Y24D9A.8a;Y24D9A.8b  | LASTWEGIRAAK        | 37  | 2063  | 1.23 | 0.18 | 14  |
| 22 Y24D9A.8a;Y24D9A.8b | GASVVVADTGDFNAIK    | 74  | 1536  | 1.25 | 0.29 | 23  |
| 22 Y24D9A.8a;Y24D9A.8b | EFQPTDATTNPSLILAASK | 17  | 2611  | 1.26 | 0.20 | 16  |
| 10 Y24D9A.8a;Y24D9A.8b | EFQPTDATTNPSLILAASK | 11  | 3957  | 1.26 | 0.13 | 10  |
| 10 Y24D9A.8a;Y24D9A.8b | GASVVVADTGDFNAIK    | 19  | 431   | 1.27 | 0.17 | 14  |
| 7 Y24D9A.8a;Y24D9A.8b  | GASVVVADTGDFNAIK    | 73  | 3583  | 1.27 | 0.15 | 12  |
| 7 Y24D9A.8a;Y24D9A.8b  | QLAAETELAPVVLSTSHAK | 61  | 1541  | 1.27 | 0.17 | 13  |
| 22 Y24D9A.8a;Y24D9A.8b | TQVMAASFRNTEEIK     | 12  | 799   | 1.28 | 0.16 | 13  |
| 7 Y24D9A.8a;Y24D9A.8b  | LASTWEGIRAAK        | 32  | 1880  | 1.28 | 0.09 | 7   |
| 1 Y24D9A.8a;Y24D9A.8b  | GASVVVADTGDFNAIK    | 72  | 1298  | 1.30 | 0.14 | 11  |
| 1 Y24D9A.8a;Y24D9A.8b  | QLAAETELAPVVLSTSHAK | 88  | 4042  | 1.31 | 0.12 | 9   |
| 1 Y24D9A.8a;Y24D9A.8b  | QLAAETELAPVVLSTSHAK | 11  | 1822  | 1.31 | 0.26 | 20  |
| 1 Y24D9A.8a;Y24D9A.8b  | QLAAETELAPVVLSTSHAK | 98  | 4186  | 1.33 | 0.13 | 10  |
| 1 Y24D9A.8a;Y24D9A.8b  | QLAAETELAPVVLSTSHAK | 86  | 2155  | 1.35 | 0.17 | 13  |
| 22 Y24D9A.8a;Y24D9A.8b | LASTWEGIRAAK        | 56  | 2738  | 1.37 | 0.14 | 10  |
| 22 Y24D9A.8a;Y24D9A.8b | GASVVVADTGDFNAIK    | 79  | 1030  | 1.38 | 0.18 | 13  |
| 7 Y24D9A.8a;Y24D9A.8b  | GASVVVADTGDFNAIK    | 30  | 850   | 1.39 | 0.16 | 11  |
| 1 Y24D9A.8a;Y24D9A.8b  | GASVVVADTGDFNAIK    | 81  | 963   | 1.41 | 0.14 | 10  |
| 1 Y24D9A.8a;Y24D9A.8b  | MEQYAALIDQSVAYAK    | 107 | 2140  | 1.45 | 0.16 | 11  |
| 22 Y24D9A.8a;Y24D9A.8b | EFQPTDATTNPSLILAASK | 12  | 4408  | 1.46 | 0.21 | 14  |
| 22 Y24D9A.8a;Y24D9A.8b | DRILIK              | 11  | 9222  | 1.47 | 0.07 | 5   |
| 22 Y24D9A.8a;Y24D9A.8b | LASTWEGIRAAK        | 65  | 2015  | 1.47 | 0.34 | 23  |
| 1 Y24D9A.8a;Y24D9A.8b  | QLAAETELAPVVLSTSHAK | 25  | 403   | 1.50 | 0.17 | 11  |
| 22 Y24D9A.8a;Y24D9A.8b | QLAAETELAPVVLSTSHAK | 104 | 6603  | 1.50 | 0.11 | 7   |
| 22 Y24D9A.8a;Y24D9A.8b | TQVMAASFRNTEEIK     | 24  | 5089  | 1.51 | 0.27 | 18  |
| 7 Y24D9A.8a;Y24D9A.8b  | TQVMAASFRNTEEIK     | 69  | 3622  | 1.52 | 0.15 | 10  |
| 1 Y24D9A.8a;Y24D9A.8b  | QLAAETELAPVVLSTSHAK | 85  | 3335  | 1.52 | 0.16 | 11  |
| 22 Y24D9A.8a;Y24D9A.8b | GASVVVADTGDFNAIK    | 75  | 1324  | 1.54 | 0.14 | 9   |
| 7 Y24D9A.8a;Y24D9A.8b  | GASVVVADTGDFNAIK    | 63  | 3608  | 1.57 | 0.12 | 8   |
| 1 Y24D9A.8a;Y24D9A.8b  | MEQYAALIDQSVAYAK    | 98  | 2535  | 1.62 | 0.10 | 6   |
| 10 Y24D9A.8a;Y24D9A.8b | TQVMAASFRNTEEIK     | 70  | 2490  | 1.62 | 0.08 | 5   |
| 1 Y24D9A.8a;Y24D9A.8b  | GASVVVADTGDFNAIK    | 97  | 2090  | 1.68 | 0.11 | 7   |
| 7 Y24D9A.8a;Y24D9A.8b  | TQVMAASFRNTEEIK     | 74  | 2602  | 1.68 | 0.16 | 9   |
| 1 Y24D9A.8a;Y24D9A.8b  | GASVVVADTGDFNAIK    | 83  | 1052  | 1.70 | 0.17 | 10  |
| 10 Y24D9A.8a;Y24D9A.8b | QLAAETELAPVVLSTSHAK | 114 | 6395  | 1.76 | 0.13 | 7   |
| 1 Y24D9A.8a;Y24D9A.8b  | QLAAETELAPVVLSTSHAK | 93  | 4282  | 1.78 | 0.17 | 10  |
| 22 Y24D9A.8a;Y24D9A.8b | GASVVVADTGDFNAIK    | 84  | 2263  | 1.78 | 0.18 | 10  |
| 10 Y24D9A.8a;Y24D9A.8b | QLAAETELAPVVLSTSHAK | 89  | 6968  | 1.82 | 0.13 | 7   |
| 10 Y24D9A.8a;Y24D9A.8b | TQVMAASFRNTEEIK     | 71  | 2446  | 1.83 | 0.16 | 9   |
| 7 Y24D9A.8a;Y24D9A.8b  | GASVVVADTGDFNAIK    | 45  | 1207  | 1.85 | 0.21 | 11  |
| 10 Y24D9A.8a;Y24D9A.8b | DRILIK              | 13  | 13342 | 1.91 | 0.03 | 2   |
| 1 Y24D9A.8a;Y24D9A.8b  | GASVVVADTGDFNAIK    | 90  | 1600  | 1.94 | 0.18 | 9   |
| 10 Y24D9A.8a;Y24D9A.8b | DRILIK              | 11  | 10710 | 1.94 | 0.06 | 3   |
| 22 Y24D9A.8a;Y24D9A.8b | QLAAETELAPVVLSTSHAK | 59  | 3681  | 1.97 | 0.16 | 8   |
| 7 Y24D9A.8a;Y24D9A.8b  | TQVMAASFRNTEEIK     | 32  | 914   | 2.03 | 0.16 | 8   |
| 10 Y24D9A.8a;Y24D9A.8b | GASVVVADTGDFNAIK    | 40  | 1254  | 2.07 | 0.17 | 8   |
| 1 Y24D9A.8a;Y24D9A.8b  | GASVVVADTGDFNAIK    | 75  | 2060  | 2.14 | 0.19 | 9   |
| 10 Y24D9A.8a;Y24D9A.8b | TQVMAASFRNTEEIK     | 15  | 7301  | 2.14 | 0.32 | 15  |
| 22 Y24D9A.8a;Y24D9A.8b | TQVMAASFRNTEEIK     | 35  | 1111  | 2.18 | 0.10 | 5   |
| 22 Y24D9A.8a;Y24D9A.8b | TQVMAASFRNTEEIK     | 12  | 4006  | 2.25 | 0.26 | 12  |
| 22 Y24D9A.8a;Y24D9A.8b | QLAAETELAPVVLSTSHAK | 17  | 6207  | 2.26 | 0.11 | 5   |
| 1 Y24D9A.8a;Y24D9A.8b  | QLAAETELAPVVLSTSHAK | 35  | 7020  | 2.27 | 0.17 | 7   |
| 10 Y24D9A.8a;Y24D9A.8b | QLAAETELAPVVLSTSHAK | 19  | 2495  | 2.33 | 0.17 | 7   |
| 10 Y24D9A.8a;Y24D9A.8b | QLAAETELAPVVLSTSHAK | 26  | 9480  | 2.35 | 0.19 | 8   |
| 10 Y24D9A.8a;Y24D9A.8b | QLAAETELAPVVLSTSHAK | 18  | 1675  | 2.44 | 0.13 | 5   |
| 22 Y24D9A.8a;Y24D9A.8b | GASVVVADTGDFNAIK    | 45  | 1296  | 2.45 | 0.11 | 5   |
| 1 Y24D9A.8a;Y24D9A.8b  | MEQYAALIDQSVAYAK    | 102 | 4616  | 2.50 | 0.18 | 7   |
| 1 Y24D9A.8a;Y24D9A.8b  | QLAAETELAPVVLSTSHAK | 19  | 2557  | 2.50 | 0.32 | 13  |
| 10 Y24D9A.8a;Y24D9A.8b | TQVMAASFRNTEEIK     | 21  | 1675  | 2.52 | 0.20 | 8   |
| 10 Y24D9A.8a;Y24D9A.8b | TQVMAASFRNTEEIK     | 18  | 1193  | 2.58 | 0.07 | 3   |
| 1 Y24D9A.8a;Y24D9A.8b  | GASVVVADTGDFNAIK    | 48  | 1776  | 2.85 | 0.09 | 3   |
| 22 Y24D9A.8a;Y24D9A.8b | TQVMAASFRNTEEIK     | 62  | 2080  | 2.86 | 0.14 | 5   |
| 22 Y24D9A.8a;Y24D9A.8b | GASVVVADTGDFNAIK    | 34  | 1729  | 3.10 | 0.16 | 5   |
| 1 Y24D9A.8a;Y24D9A.8b  | MEQYAALIDQSVAYAK    | 97  | 2731  | 3.18 | 0.23 | 7   |
| 22 Y24D9A.8a;Y24D9A.8b | TQVMAASFRNTEEIK     | 38  | 1199  | 3.19 | 0.19 | 6   |
| 1 Y24D9A.8a;Y24D9A.8b  | GASVVVADTGDFNAIK    | 40  | 195   | 6.14 | 0.19 | 3   |
| 22 Y24F12A.2           | FNIYHQVK            | 21  | 5155  | 0.52 | 0.10 | 19  |
| 10 Y24F12A.2           | FNIYHQVK            | 33  | 4603  | 1.10 | 0.09 | 8   |
| 7 Y32B12B.4            | YPPAK               | 10  | 3828  | 0.39 | 0.68 | 174 |
| 10 Y32H12A.8           | CREAFK              | 18  | 9915  | 4.38 | 0.42 | 10  |
| 10 Y37A1B.1a           | VLLLSHAGK           | 47  | 2898  | 1.74 | 0.15 | 9   |
| 10 Y37A1B.1a           | VLLLSHAGK           | 35  | 2970  | 2.59 | 0.13 | 5   |
| 22 Y37E3.10            | LLEDIRK             | 31  | 2973  | 0.31 | 0.47 | 155 |
| 22 Y37E3.10            | GLDQQQVDAEEASRDNRK  | 37  | 13061 | 0.38 | 0.17 | 45  |
| 22 Y37E3.10            | GLDQQQVDAEEASRDNRK  | 35  | 12492 | 0.40 | 0.40 | 98  |
| 22 Y37E3.10            | GLDQQQVDAEEASRDNRK  | 33  | 12937 | 0.47 | 0.17 | 36  |
| 22 Y37E3.10            | GLDQQQVDAEEASRDNRK  | 37  | 10959 | 0.50 | 0.16 | 32  |
| 7 Y37E3.10             | LLEDIRK             | 12  | 653   | 0.65 | 0.25 | 39  |
| 22 Y37E3.10            | TAWHFD RK           | 11  | 2027  | 1.74 | 0.19 | 11  |
| 1 Y37E3.10             | LLEDIRK             | 34  | 1743  | 1.75 | 0.17 | 10  |
| 1 Y37E3.10             | LLEDIRK             | 35  | 1651  | 2.04 | 0.12 | 6   |
| 10 Y37E3.17a;Y37E3.17b | SREVL SALT K        | 25  | 643   | 0.19 | 0.25 | 136 |
| 10 Y37E3.17a;Y37E3.17b | SGDDYLFGGFESLEK     | 41  | 967   | 0.40 | 0.17 | 43  |
| 22 Y37E3.17a;Y37E3.17b | SGDDYLFGGFESLEK     | 70  | 1854  | 0.40 | 0.28 | 72  |
| 10 Y37E3.17a;Y37E3.17b | SGDDYLFGGFESLEK     | 49  | 850   | 0.47 | 0.09 | 19  |
| 22 Y37E3.17a;Y37E3.17b | LMDYAIASQIPALGK     | 32  | 1387  | 0.54 | 0.09 | 17  |
| 22 Y37E3.17a;Y37E3.17b | SGDDYLFGGFESLEK     | 42  | 1677  | 0.55 | 0.14 | 25  |
| 10 Y37E3.17a;Y37E3.17b | SREVL SALT K        | 23  | 805   | 0.55 | 0.22 | 39  |
| 10 Y37E3.17a;Y37E3.17b | SGDDYLFGGFESLEK     | 75  | 1250  | 0.57 | 0.10 | 18  |
| 22 Y37E3.17a;Y37E3.17b | SGDDYLFGGFESLEK     | 49  | 1117  | 0.59 | 0.18 | 31  |
| 10 Y37E3.17a;Y37E3.17b | EFIGRESALELK        | 18  | 3708  | 0.63 | 0.21 | 33  |
| 22 Y37E3.17a;Y37E3.17b | TTLTDPQVRELAPVDH SK | 14  | 3610  | 0.64 | 0.36 | 56  |
| 10 Y37E3.17a;Y37E3.17b | SGDDYLFGGFESLEK     | 44  | 800   | 0.68 | 0.10 | 15  |
| 22 Y37E3.17a;Y37E3.17b | SGDDYLFGGFESLEK     | 50  | 1515  | 0.69 | 0.09 | 14  |

|                        |                            |     |       |      |      |     |
|------------------------|----------------------------|-----|-------|------|------|-----|
| 10 Y37E3.17a;Y37E3.17b | EFIGRESALELK               | 16  | 3513  | 0.71 | 0.37 | 52  |
| 22 Y37E3.17a;Y37E3.17b | SREVLSALTK                 | 12  | 3815  | 0.73 | 0.16 | 22  |
| 10 Y37E3.17a;Y37E3.17b | TLLLTPDQVRELAPDVDHSK       | 60  | 5702  | 0.75 | 0.21 | 27  |
| 10 Y37E3.17a;Y37E3.17b | TLLLTPDQVRELAPDVDHSK       | 29  | 6061  | 0.77 | 0.05 | 6   |
| 10 Y37E3.17a;Y37E3.17b | LMDYAIASQIPALGK            | 27  | 858   | 0.78 | 0.12 | 16  |
| 22 Y37E3.17a;Y37E3.17b | NERLVVDIGDK                | 14  | 2276  | 0.80 | 0.14 | 17  |
| 10 Y37E3.17a;Y37E3.17b | LMDYAIASQIPALGK            | 29  | 1365  | 0.81 | 0.13 | 17  |
| 22 Y37E3.17a;Y37E3.17b | TVIREDWYK                  | 15  | 5286  | 0.83 | 0.18 | 22  |
| 10 Y37E3.17a;Y37E3.17b | TLLLTPDQVRELAPDVDHSK       | 11  | 4630  | 0.86 | 0.16 | 18  |
| 10 Y37E3.17a;Y37E3.17b | TLLLTPDQVRELAPDVDHSK       | 20  | 6992  | 0.89 | 0.20 | 22  |
| 1 Y37E3.17a;Y37E3.17b  | TLLLTPDQVRELAPDVDHSK       | 10  | 978   | 0.90 | 0.17 | 19  |
| 10 Y37E3.17a;Y37E3.17b | SGDDYLFGGFESLEK            | 50  | 1081  | 0.91 | 0.17 | 19  |
| 22 Y37E3.17a;Y37E3.17b | EFIGRESALELK               | 12  | 5018  | 0.91 | 0.16 | 18  |
| 10 Y37E3.17a;Y37E3.17b | TLLLTPDQVRELAPDVDHSK       | 24  | 5049  | 0.92 | 0.06 | 7   |
| 10 Y37E3.17a;Y37E3.17b | SGDDYLFGGFESLEK            | 62  | 1031  | 0.92 | 0.27 | 29  |
| 22 Y37E3.17a;Y37E3.17b | LMDYAIASQIPALGK            | 52  | 1588  | 0.93 | 0.09 | 9   |
| 22 Y37E3.17a;Y37E3.17b | LMDYAIASQIPALGK            | 28  | 1571  | 0.95 | 0.11 | 11  |
| 22 Y37E3.17a;Y37E3.17b | TVIREDWYK                  | 18  | 3225  | 0.98 | 0.17 | 18  |
| 22 Y37E3.17a;Y37E3.17b | TLLLTPDQVRELAPDVDHSK       | 44  | 9125  | 1.00 | 0.11 | 11  |
| 22 Y37E3.17a;Y37E3.17b | LMDYAIASQIPALGK            | 35  | 1242  | 1.02 | 0.14 | 14  |
| 10 Y37E3.17a;Y37E3.17b | TLLLTPDQVRELAPDVDHSK       | 36  | 7224  | 1.10 | 0.14 | 13  |
| 22 Y37E3.17a;Y37E3.17b | LMDYAIASQIPALGK            | 61  | 1974  | 1.15 | 0.20 | 18  |
| 22 Y37E3.17a;Y37E3.17b | LMDYAIASQIPALGK            | 35  | 1578  | 1.15 | 0.17 | 14  |
| 22 Y37E3.17a;Y37E3.17b | NERLVVDIGDK                | 11  | 3460  | 1.19 | 0.24 | 20  |
| 22 Y37E3.17a;Y37E3.17b | TLLLTPDQVRELAPDVDHSK       | 11  | 5224  | 1.21 | 0.18 | 15  |
| 10 Y37E3.17a;Y37E3.17b | NERLVVDIGDK                | 11  | 4351  | 1.23 | 0.09 | 7   |
| 10 Y37E3.17a;Y37E3.17b | TLLLTPDQVRELAPDVDHSK       | 13  | 4707  | 1.33 | 0.08 | 6   |
| 22 Y37E3.17a;Y37E3.17b | TLLLTPDQVRELAPDVDHSK       | 25  | 6687  | 1.38 | 0.25 | 18  |
| 22 Y37E3.17a;Y37E3.17b | LMDYAIASQIPALGK            | 18  | 1585  | 1.38 | 0.10 | 7   |
| 1 Y37E3.17a;Y37E3.17b  | SREVLSALTK                 | 19  | 851   | 1.39 | 0.13 | 9   |
| 22 Y37E3.17a;Y37E3.17b | LMDYAIASQIPALGK            | 11  | 1407  | 1.45 | 0.14 | 10  |
| 10 Y37E3.17a;Y37E3.17b | LMDYAIASQIPALGK            | 18  | 1135  | 1.46 | 0.19 | 13  |
| 22 Y37E3.17a;Y37E3.17b | SREVLSALTK                 | 26  | 2667  | 2.87 | 0.12 | 4   |
| 10 Y37E3.17a;Y37E3.17b | SREVLSALTK                 | 26  | 2006  | 4.42 | 0.24 | 6   |
| 7 Y38A10A.5            | TLVIQYTVK                  | 53  | 6733  | 0.05 | 0.41 | 781 |
| 7 Y38A10A.5            | HEQGIDCGGGYVK              | 50  | 5332  | 0.06 | 0.36 | 560 |
| 10 Y38A10A.5           | TLVIQYTVK                  | 61  | 11661 | 0.09 | 0.23 | 244 |
| 10 Y38A10A.5           | TLVIQYTVK                  | 47  | 7324  | 0.11 | 0.32 | 279 |
| 7 Y38A10A.5            | EEFNDAWSEK                 | 47  | 1948  | 0.12 | 0.33 | 278 |
| 10 Y38A10A.5           | TLVIQYTVK                  | 54  | 12562 | 0.14 | 0.35 | 251 |
| 10 Y38A10A.5           | TLVIQYTVK                  | 36  | 5843  | 0.21 | 0.25 | 118 |
| 10 Y38A10A.5           | IDGESAQTGSLEEDWDLLPAK      | 28  | 2066  | 0.26 | 0.24 | 94  |
| 7 Y38A10A.5            | TLVIQYTVK                  | 51  | 3181  | 0.31 | 0.35 | 112 |
| 10 Y38A10A.5           | IDGESAQTGSLEEDWDLLPAK      | 23  | 1772  | 0.34 | 0.50 | 146 |
| 10 Y38A10A.5           | IDGESAQTGSLEEDWDLLPAK      | 22  | 1388  | 0.37 | 0.09 | 24  |
| 10 Y38A10A.5           | SGTIFDNIITDSVEEAEEHAAETFDK | 33  | 2619  | 0.39 | 0.23 | 61  |
| 1 Y38A10A.5            | FFDVESRDQGIQTSQDAK         | 50  | 4877  | 0.39 | 0.09 | 22  |
| 10 Y38A10A.5           | SDELTHLYTLILNSDNTYEVK      | 30  | 1776  | 0.42 | 0.16 | 38  |
| 1 Y38A10A.5            | FFDVESRDQGIQTSQDAK         | 33  | 4148  | 0.44 | 0.08 | 18  |
| 7 Y38A10A.5            | FFDVESRDQGIQTSQDAK         | 51  | 2494  | 0.45 | 0.18 | 40  |
| 22 Y38A10A.5           | EEFNDAWSEK                 | 45  | 4765  | 0.48 | 0.10 | 21  |
| 7 Y38A10A.5            | TLVIQYTVK                  | 13  | 365   | 0.49 | 0.44 | 90  |
| 7 Y38A10A.5            | FFDVESRDQGIQTSQDAK         | 45  | 50688 | 0.51 | 0.12 | 23  |
| 10 Y38A10A.5           | SDELTHLYTLILNSDNTYEVK      | 32  | 2449  | 0.53 | 0.22 | 42  |
| 7 Y38A10A.5            | FFDVESRDQGIQTSQDAK         | 53  | 35885 | 0.54 | 0.07 | 14  |
| 7 Y38A10A.5            | FFDVESRDQGIQTSQDAK         | 37  | 3766  | 0.55 | 0.16 | 30  |
| 10 Y38A10A.5           | TLVIQYTVK                  | 70  | 26387 | 0.57 | 0.13 | 23  |
| 22 Y38A10A.5           | TLVIQYTVK                  | 15  | 2041  | 0.58 | 0.16 | 28  |
| 22 Y38A10A.5           | TLVIQYTVK                  | 25  | 2142  | 0.59 | 0.12 | 21  |
| 22 Y38A10A.5           | FFDVESRDQGIQTSQDAK         | 22  | 5418  | 0.60 | 0.18 | 30  |
| 10 Y38A10A.5           | TLVIQYTVK                  | 64  | 8918  | 0.60 | 0.08 | 13  |
| 10 Y38A10A.5           | FFDVESRDQGIQTSQDAK         | 37  | 6420  | 0.60 | 0.11 | 18  |
| 10 Y38A10A.5           | TLVIQYTVK                  | 74  | 25445 | 0.60 | 0.05 | 9   |
| 10 Y38A10A.5           | TLVIQYTVK                  | 67  | 8930  | 0.61 | 0.09 | 14  |
| 10 Y38A10A.5           | FFDVESRDQGIQTSQDAK         | 16  | 4428  | 0.61 | 0.10 | 16  |
| 10 Y38A10A.5           | IDGESAQTGSLEEDWDLLPAK      | 33  | 1404  | 0.62 | 0.14 | 23  |
| 10 Y38A10A.5           | TLVIQYTVK                  | 43  | 1783  | 0.63 | 0.13 | 20  |
| 10 Y38A10A.5           | TLVIQYTVK                  | 35  | 2058  | 0.63 | 0.10 | 16  |
| 10 Y38A10A.5           | TLVIQYTVK                  | 38  | 2611  | 0.63 | 0.08 | 13  |
| 22 Y38A10A.5           | EEFNDAWSEK                 | 20  | 1619  | 0.63 | 0.15 | 24  |
| 10 Y38A10A.5           | TLVIQYTVK                  | 18  | 1520  | 0.63 | 0.06 | 10  |
| 10 Y38A10A.5           | TLVIQYTVK                  | 49  | 3475  | 0.64 | 0.12 | 18  |
| 10 Y38A10A.5           | IDGESAQTGSLEEDWDLLPAK      | 40  | 2395  | 0.64 | 0.18 | 28  |
| 10 Y38A10A.5           | TLVIQYTVK                  | 13  | 952   | 0.65 | 0.19 | 29  |
| 10 Y38A10A.5           | TLVIQYTVK                  | 21  | 1733  | 0.66 | 0.13 | 20  |
| 22 Y38A10A.5           | TLVIQYTVK                  | 24  | 1657  | 0.66 | 0.15 | 23  |
| 7 Y38A10A.5            | TLVIQYTVK                  | 14  | 1678  | 0.66 | 0.22 | 33  |
| 10 Y38A10A.5           | TLVIQYTVK                  | 22  | 1169  | 0.68 | 0.08 | 11  |
| 7 Y38A10A.5            | TLVIQYTVK                  | 55  | 38739 | 0.69 | 0.06 | 8   |
| 7 Y38A10A.5            | FFDVESRDQGIQTSQDAK         | 22  | 2315  | 0.69 | 0.08 | 12  |
| 10 Y38A10A.5           | TLVIQYTVK                  | 48  | 3512  | 0.71 | 0.11 | 16  |
| 10 Y38A10A.5           | TLVIQYTVK                  | 21  | 1169  | 0.71 | 0.07 | 10  |
| 10 Y38A10A.5           | TLVIQYTVK                  | 23  | 1526  | 0.72 | 0.29 | 40  |
| 22 Y38A10A.5           | TLVIQYTVK                  | 69  | 17085 | 0.73 | 0.09 | 12  |
| 10 Y38A10A.5           | TLVIQYTVK                  | 17  | 1549  | 0.76 | 0.12 | 16  |
| 22 Y38A10A.5           | TLVIQYTVK                  | 37  | 2631  | 0.76 | 0.13 | 18  |
| 10 Y38A10A.5           | TLVIQYTVK                  | 16  | 1409  | 0.80 | 0.14 | 18  |
| 7 Y38A10A.5            | FFDVESRDQGIQTSQDAK         | 33  | 3331  | 0.81 | 0.12 | 16  |
| 10 Y38A10A.5           | SDELTHLYTLILNSDNTYEVK      | 26  | 1953  | 0.82 | 0.12 | 14  |
| 7 Y38A10A.5            | TLVIQYTVK                  | 63  | 45945 | 0.84 | 0.07 | 9   |
| 10 Y38A10A.5           | SDELTHLYTLILNSDNTYEVK      | 23  | 1407  | 0.84 | 0.20 | 24  |
| 7 Y38A10A.5            | TLVIQYTVK                  | 10  | 1519  | 0.86 | 0.06 | 7   |
| 22 Y38A10A.5           | TLVIQYTVK                  | 74  | 18279 | 0.87 | 0.05 | 5   |
| 22 Y38A10A.5           | FFDVESRDQGIQTSQDAK         | 25  | 4210  | 0.88 | 0.16 | 18  |
| 7 Y38A10A.5            | TLVIQYTVK                  | 10  | 1522  | 0.88 | 0.13 | 15  |
| 7 Y38A10A.5            | HEQGIDCGGGYVK              | 113 | 6215  | 0.89 | 0.10 | 11  |
| 10 Y38A10A.5           | TLVIQYTVK                  | 10  | 1140  | 0.90 | 0.13 | 14  |
| 22 Y38A10A.5           | TLVIQYTVK                  | 49  | 3803  | 1.00 | 0.14 | 14  |
| 1 Y38A10A.5            | HEQGIDCGGGYVK              | 57  | 15777 | 1.02 | 0.12 | 12  |
| 7 Y38A10A.5            | HEQGIDCGGGYVK              | 46  | 22441 | 1.02 | 0.11 | 11  |
| 7 Y38A10A.5            | HEQGIDCGGGYVK              | 32  | 8426  | 1.05 | 0.08 | 7   |

|                          |                    |     |       |       |      |    |
|--------------------------|--------------------|-----|-------|-------|------|----|
| 1 Y38A10A.5              | FFDVESRDQGIQTSQDAK | 21  | 1810  | 1.05  | 0.13 | 13 |
| 22 Y38A10A.5             | TLVIQYTVK          | 40  | 3827  | 1.05  | 0.08 | 8  |
| 7 Y38A10A.5              | HEQGIDCGGGYVK      | 15  | 1494  | 1.06  | 0.17 | 16 |
| 1 Y38A10A.5              | TLVIQYTVK          | 31  | 1669  | 1.07  | 0.16 | 15 |
| 1 Y38A10A.5              | HEQGIDCGGGYVK      | 120 | 26819 | 1.08  | 0.09 | 8  |
| 22 Y38A10A.5             | TLVIQYTVK          | 34  | 2642  | 1.14  | 0.12 | 10 |
| 22 Y38A10A.5             | TLVIQYTVK          | 11  | 1920  | 1.15  | 0.14 | 12 |
| 7 Y38A10A.5              | HEQGIDCGGGYVK      | 25  | 6020  | 1.16  | 0.12 | 10 |
| 1 Y38A10A.5              | HEQGIDCGGGYVK      | 103 | 16320 | 1.21  | 0.11 | 9  |
| 7 Y38A10A.5              | HEQGIDCGGGYVK      | 115 | 7743  | 1.27  | 0.09 | 7  |
| 1 Y38A10A.5              | TLVIQYTVK          | 21  | 1219  | 1.31  | 0.15 | 12 |
| 7 Y38A10A.5              | TLVIQYTVK          | 11  | 1868  | 1.36  | 0.15 | 11 |
| 7 Y38A10A.5              | HEQGIDCGGGYVK      | 122 | 5644  | 1.38  | 0.16 | 11 |
| 10 Y38A10A.5             | TLVIQYTVK          | 33  | 8709  | 1.38  | 0.10 | 7  |
| 1 Y38A10A.5              | FFDVESRDQGIQTSQDAK | 32  | 5087  | 1.43  | 0.14 | 10 |
| 10 Y38A10A.5             | FFDVESRDQGIQTSQDAK | 16  | 2453  | 1.46  | 0.10 | 7  |
| 22 Y38A10A.5             | HEQGIDCGGGYVK      | 126 | 16234 | 1.52  | 0.11 | 7  |
| 22 Y38A10A.5             | FFDVESRDQGIQTSQDAK | 19  | 2484  | 1.52  | 0.14 | 9  |
| 22 Y38A10A.5             | HEQGIDCGGGYVK      | 109 | 12993 | 1.55  | 0.11 | 7  |
| 10 Y38A10A.5             | TLVIQYTVK          | 30  | 6485  | 1.58  | 0.16 | 10 |
| 10 Y38A10A.5             | FFDVESRDQGIQTSQDAK | 26  | 2472  | 1.60  | 0.12 | 8  |
| 7 Y38A10A.5              | TLVIQYTVK          | 19  | 1974  | 1.67  | 0.14 | 8  |
| 22 Y38A10A.5             | FYSRAAK            | 11  | 3836  | 1.79  | 0.16 | 9  |
| 10 Y38A10A.5             | FFDVESRDQGIQTSQDAK | 14  | 2509  | 2.01  | 0.18 | 9  |
| 22 Y38A10A.5             | TLVIQYTVK          | 27  | 6968  | 2.09  | 0.12 | 6  |
| 22 Y38A10A.5             | FFDVESRDQGIQTSQDAK | 39  | 1984  | 2.11  | 0.19 | 9  |
| 22 Y38A10A.5             | FFDVESRDQGIQTSQDAK | 31  | 5951  | 2.12  | 0.14 | 6  |
| 22 Y38A10A.5             | TLVIQYTVK          | 36  | 10431 | 2.13  | 0.09 | 4  |
| 10 Y38A10A.5             | FFDVESRDQGIQTSQDAK | 18  | 3567  | 2.31  | 0.15 | 6  |
| 1 Y38A10A.5              | TLVIQYTVK          | 31  | 4829  | 2.35  | 0.10 | 4  |
| 1 Y38A10A.5              | TLVIQYTVK          | 23  | 2643  | 2.44  | 0.23 | 9  |
| 10 Y38A10A.5             | FYSRAAK            | 25  | 21053 | 2.49  | 0.04 | 2  |
| 10 Y38A10A.5             | HEQGIDCGGGYVK      | 102 | 22754 | 2.55  | 0.11 | 4  |
| 1 Y38A10A.5              | TLVIQYTVK          | 28  | 4580  | 2.57  | 0.11 | 4  |
| 10 Y38A10A.5             | HEQGIDCGGGYVK      | 110 | 16531 | 2.59  | 0.08 | 3  |
| 1 Y38A10A.5              | TLVIQYTVK          | 27  | 2726  | 3.04  | 0.10 | 3  |
| 7 Y38A10A.5              | HEQGIDCGGGYVK      | 35  | 2229  | 3.83  | 0.24 | 6  |
| 10 Y38A10A.5             | FYSRAAK            | 16  | 4366  | 4.09  | 0.22 | 5  |
| 7 Y38A10A.5              | TLVIQYTVK          | 54  | 3761  | 8.50  | 0.32 | 4  |
| 7 Y38A10A.5              | FFDVESRDQGIQTSQDAK | 49  | 2982  | 10.78 | 0.39 | 4  |
| 7 Y38A10A.5              | TLVIQYTVK          | 54  | 5677  | 13.02 | 0.25 | 2  |
| 7 Y38A10A.5              | TLVIQYTVK          | 48  | 2868  | 13.28 | 0.17 | 1  |
| 7 Y38A10A.5              | TLVIQYTVK          | 47  | 3249  | 14.36 | 0.44 | 3  |
| 10 Y38A8.2               | VYVGLAGFQSDARTVLEK | 13  | 1027  | 0.51  | 0.26 | 51 |
| 22 Y38A8.2               | VYVGLAGFQSDARTVLEK | 50  | 2037  | 0.87  | 0.12 | 14 |
| 22 Y38A8.3;K09C6.4       | RRPIEPEHIK         | 14  | 1904  | 2.07  | 0.03 | 2  |
| 10 Y38F1A.6              | EALRIIGK           | 11  | 2130  | 0.49  | 0.07 | 14 |
| 22 Y38F1A.6              | SADREIISTLYEK      | 44  | 4877  | 0.79  | 0.13 | 16 |
| 22 Y38F1A.6              | SADREIISTLYEK      | 35  | 4575  | 0.95  | 0.11 | 11 |
| 22 Y38F1A.6              | EALRIIGK           | 11  | 1432  | 0.99  | 0.10 | 11 |
| 22 Y38F1A.6              | EALRIIGK           | 28  | 1987  | 1.06  | 0.04 | 3  |
| 22 Y38F1A.6              | EALRIIGK           | 25  | 2178  | 1.08  | 0.05 | 5  |
| 10 Y38F1A.6              | NVQNTIAFK          | 62  | 6193  | 1.12  | 0.16 | 15 |
| 1 Y38F1A.6               | NVQNTIAFK          | 23  | 1327  | 1.22  | 0.02 | 2  |
| 22 Y38F1A.6              | NVQNTIAFK          | 40  | 4697  | 1.22  | 0.14 | 11 |
| 22 Y38F1A.6              | TLLITDK            | 12  | 849   | 1.28  | 0.13 | 10 |
| 22 Y38F1A.6              | EALRIIGK           | 14  | 917   | 1.34  | 0.16 | 12 |
| 22 Y38F1A.6              | NVQNTIAFK          | 52  | 5504  | 1.48  | 0.10 | 6  |
| 22 Y38F1A.6              | NVQNTIAFK          | 24  | 2217  | 1.54  | 0.14 | 9  |
| 22 Y38F1A.6              | NVQNTIAFK          | 17  | 1905  | 1.57  | 0.29 | 18 |
| 22 Y38F1A.6              | NVQNTIAFK          | 44  | 6698  | 1.67  | 0.09 | 5  |
| 10 Y38F2AL.3a;Y38F2AL.3b | QISQIDNDLK         | 52  | 11446 | 0.29  | 0.24 | 83 |
| 10 Y38F2AL.3a;Y38F2AL.3b | FQWEGAK            | 23  | 4677  | 0.38  | 0.20 | 52 |
| 10 Y38F2AL.3a;Y38F2AL.3b | QISQIDNDLK         | 47  | 15907 | 0.43  | 0.17 | 39 |
| 7 Y38F2AL.3a;Y38F2AL.3b  | IAENLVIGNK         | 58  | 3430  | 0.47  | 0.05 | 11 |
| 10 Y38F2AL.3a;Y38F2AL.3b | FQWEGAK            | 32  | 5001  | 0.49  | 0.16 | 34 |
| 10 Y38F2AL.3a;Y38F2AL.3b | YLIPDLK            | 25  | 3508  | 0.51  | 0.13 | 26 |
| 7 Y38F2AL.3a;Y38F2AL.3b  | IAENLVIGNK         | 12  | 4411  | 0.53  | 0.04 | 7  |
| 22 Y38F2AL.3a;Y38F2AL.3b | FIVRDFVYDEETLK     | 30  | 666   | 0.55  | 0.28 | 52 |
| 22 Y38F2AL.3a;Y38F2AL.3b | LDTSAEAVIRK        | 29  | 2212  | 0.56  | 0.24 | 43 |
| 22 Y38F2AL.3a;Y38F2AL.3b | SLTYNNLK           | 54  | 21600 | 0.59  | 0.05 | 8  |
| 7 Y38F2AL.3a;Y38F2AL.3b  | QISQIDNDLK         | 46  | 4824  | 0.61  | 0.10 | 16 |
| 7 Y38F2AL.3a;Y38F2AL.3b  | IAENLVIGNK         | 32  | 3103  | 0.61  | 0.19 | 30 |
| 7 Y38F2AL.3a;Y38F2AL.3b  | YATLSSMVVPGSSK     | 15  | 5447  | 0.61  | 0.28 | 46 |
| 22 Y38F2AL.3a;Y38F2AL.3b | LDTSAEAVIRK        | 49  | 6433  | 0.62  | 0.14 | 23 |
| 22 Y38F2AL.3a;Y38F2AL.3b | LRQELHK            | 18  | 10745 | 0.64  | 0.09 | 14 |
| 1 Y38F2AL.3a;Y38F2AL.3b  | VLSEIIGK           | 67  | 2325  | 0.64  | 0.06 | 10 |
| 7 Y38F2AL.3a;Y38F2AL.3b  | QISQIDNDLK         | 46  | 11420 | 0.65  | 0.10 | 16 |
| 10 Y38F2AL.3a;Y38F2AL.3b | LRQELHK            | 16  | 40962 | 0.66  | 0.10 | 16 |
| 7 Y38F2AL.3a;Y38F2AL.3b  | YLIPDLK            | 22  | 654   | 0.68  | 0.14 | 21 |
| 7 Y38F2AL.3a;Y38F2AL.3b  | VGTLDQLVGLSDDLK    | 32  | 828   | 0.71  | 0.15 | 21 |
| 1 Y38F2AL.3a;Y38F2AL.3b  | LDTSAEAVIRK        | 41  | 3654  | 0.72  | 0.13 | 19 |
| 22 Y38F2AL.3a;Y38F2AL.3b | TVGSLLTK           | 47  | 7127  | 0.72  | 0.15 | 21 |
| 1 Y38F2AL.3a;Y38F2AL.3b  | IAENLVIGNK         | 67  | 12964 | 0.73  | 0.05 | 7  |
| 10 Y38F2AL.3a;Y38F2AL.3b | IAENLVIGNK         | 69  | 19759 | 0.73  | 0.08 | 11 |
| 1 Y38F2AL.3a;Y38F2AL.3b  | VLSEIIGK           | 54  | 1976  | 0.75  | 0.14 | 18 |
| 1 Y38F2AL.3a;Y38F2AL.3b  | TVGSLLTK           | 51  | 2250  | 0.77  | 0.06 | 7  |
| 1 Y38F2AL.3a;Y38F2AL.3b  | VLSEIIGK           | 20  | 709   | 0.77  | 0.14 | 18 |
| 22 Y38F2AL.3a;Y38F2AL.3b | TVGSLLTK           | 46  | 7935  | 0.78  | 0.11 | 14 |
| 1 Y38F2AL.3a;Y38F2AL.3b  | IAENLVIGNK         | 79  | 10619 | 0.78  | 0.03 | 4  |
| 22 Y38F2AL.3a;Y38F2AL.3b | LDTSAEAVIRK        | 24  | 3233  | 0.78  | 0.12 | 15 |
| 10 Y38F2AL.3a;Y38F2AL.3b | IAENLVIGNK         | 81  | 21163 | 0.79  | 0.07 | 8  |
| 7 Y38F2AL.3a;Y38F2AL.3b  | SLTYNNLK           | 44  | 17607 | 0.79  | 0.21 | 27 |
| 7 Y38F2AL.3a;Y38F2AL.3b  | YLIPDLK            | 22  | 7221  | 0.80  | 0.10 | 13 |
| 22 Y38F2AL.3a;Y38F2AL.3b | SLTYNNLK           | 14  | 9858  | 0.81  | 0.17 | 21 |
| 10 Y38F2AL.3a;Y38F2AL.3b | YLIPDLK            | 22  | 2734  | 0.81  | 0.10 | 13 |
| 1 Y38F2AL.3a;Y38F2AL.3b  | LDTSAEAVIRK        | 49  | 4366  | 0.82  | 0.17 | 21 |
| 7 Y38F2AL.3a;Y38F2AL.3b  | NALASMDRK          | 21  | 18993 | 0.83  | 0.15 | 18 |
| 10 Y38F2AL.3a;Y38F2AL.3b | TVGSLLTK           | 43  | 9903  | 0.84  | 0.19 | 22 |
| 10 Y38F2AL.3a;Y38F2AL.3b | YATLSSMVVPGSSK     | 23  | 3696  | 0.84  | 0.25 | 30 |
| 22 Y38F2AL.3a;Y38F2AL.3b | SLTYNNLK           | 43  | 22615 | 0.84  | 0.11 | 13 |

|                          |                          |     |       |      |      |    |
|--------------------------|--------------------------|-----|-------|------|------|----|
| 7 Y38F2AL.3a;Y38F2AL.3b  | LDTSAEAVIRK              | 45  | 10751 | 0.85 | 0.06 | 7  |
| 22 Y38F2AL.3a;Y38F2AL.3b | YATLSSMVVPGSSK           | 12  | 5051  | 0.86 | 0.24 | 28 |
| 10 Y38F2AL.3a;Y38F2AL.3b | TVGSLLTK                 | 43  | 7044  | 0.86 | 0.17 | 20 |
| 10 Y38F2AL.3a;Y38F2AL.3b | LDTSAEAVIRK              | 51  | 8781  | 0.88 | 0.13 | 15 |
| 1 Y38F2AL.3a;Y38F2AL.3b  | VLSEIIGK                 | 21  | 709   | 0.88 | 0.12 | 14 |
| 22 Y38F2AL.3a;Y38F2AL.3b | LNIDFLNK                 | 22  | 4907  | 0.88 | 0.16 | 18 |
| 22 Y38F2AL.3a;Y38F2AL.3b | VGTLDQLVGLSDDLK          | 29  | 1188  | 0.89 | 0.16 | 18 |
| 7 Y38F2AL.3a;Y38F2AL.3b  | LDTSAEAVIRK              | 45  | 6093  | 0.89 | 0.10 | 11 |
| 22 Y38F2AL.3a;Y38F2AL.3b | VLSEIIGK                 | 31  | 896   | 0.91 | 0.31 | 34 |
| 10 Y38F2AL.3a;Y38F2AL.3b | LDTSAEAVIRK              | 45  | 7011  | 0.92 | 0.17 | 19 |
| 7 Y38F2AL.3a;Y38F2AL.3b  | NALASMDRK                | 21  | 11848 | 0.94 | 0.07 | 7  |
| 1 Y38F2AL.3a;Y38F2AL.3b  | DLADLVK                  | 27  | 1837  | 0.96 | 0.12 | 13 |
| 7 Y38F2AL.3a;Y38F2AL.3b  | YLIPDLK                  | 23  | 7748  | 0.97 | 0.10 | 11 |
| 7 Y38F2AL.3a;Y38F2AL.3b  | SLTYNNLK                 | 37  | 24550 | 0.97 | 0.29 | 30 |
| 10 Y38F2AL.3a;Y38F2AL.3b | YATLSSMVVPGSSK           | 16  | 2887  | 0.99 | 0.13 | 13 |
| 10 Y38F2AL.3a;Y38F2AL.3b | VLSEIIGK                 | 14  | 888   | 1.00 | 0.13 | 13 |
| 7 Y38F2AL.3a;Y38F2AL.3b  | YLIPDLK                  | 22  | 3046  | 1.02 | 0.19 | 18 |
| 10 Y38F2AL.3a;Y38F2AL.3b | YLIPDLK                  | 21  | 1528  | 1.03 | 0.28 | 27 |
| 22 Y38F2AL.3a;Y38F2AL.3b | YLIPDLK                  | 26  | 2649  | 1.03 | 0.10 | 9  |
| 10 Y38F2AL.3a;Y38F2AL.3b | LNIDFLNK                 | 19  | 3429  | 1.05 | 0.16 | 15 |
| 10 Y38F2AL.3a;Y38F2AL.3b | YLIPDLK                  | 22  | 2623  | 1.05 | 0.19 | 18 |
| 22 Y38F2AL.3a;Y38F2AL.3b | SLTYNNLK                 | 59  | 37000 | 1.05 | 0.04 | 4  |
| 10 Y38F2AL.3a;Y38F2AL.3b | SLTYNNLK                 | 16  | 4322  | 1.05 | 0.14 | 13 |
| 10 Y38F2AL.3a;Y38F2AL.3b | TVGSLLTK                 | 29  | 3920  | 1.05 | 0.13 | 12 |
| 10 Y38F2AL.3a;Y38F2AL.3b | SLTYNNLK                 | 55  | 29897 | 1.06 | 0.10 | 10 |
| 22 Y38F2AL.3a;Y38F2AL.3b | IAENLVIGNK               | 23  | 6064  | 1.07 | 0.04 | 3  |
| 22 Y38F2AL.3a;Y38F2AL.3b | SLTYNNLK                 | 56  | 32853 | 1.11 | 0.16 | 14 |
| 1 Y38F2AL.3a;Y38F2AL.3b  | TVGSLLTK                 | 44  | 1287  | 1.14 | 0.13 | 11 |
| 10 Y38F2AL.3a;Y38F2AL.3b | YATLSSMVVPGSSK           | 16  | 4345  | 1.14 | 0.10 | 9  |
| 10 Y38F2AL.3a;Y38F2AL.3b | VLSEIIGK                 | 71  | 3730  | 1.15 | 0.13 | 11 |
| 7 Y38F2AL.3a;Y38F2AL.3b  | NALASMDRK                | 13  | 5804  | 1.15 | 0.04 | 4  |
| 22 Y38F2AL.3a;Y38F2AL.3b | IAENLVIGNK               | 47  | 9902  | 1.15 | 0.08 | 7  |
| 22 Y38F2AL.3a;Y38F2AL.3b | VLSEIIGK                 | 54  | 4105  | 1.16 | 0.14 | 12 |
| 10 Y38F2AL.3a;Y38F2AL.3b | SLTYNNLK                 | 58  | 37837 | 1.20 | 0.16 | 13 |
| 22 Y38F2AL.3a;Y38F2AL.3b | NALASMDRK                | 38  | 15062 | 1.21 | 0.09 | 7  |
| 22 Y38F2AL.3a;Y38F2AL.3b | TVGSLLTK                 | 49  | 4896  | 1.22 | 0.08 | 6  |
| 10 Y38F2AL.3a;Y38F2AL.3b | SLTYNNLK                 | 22  | 7916  | 1.24 | 0.20 | 16 |
| 10 Y38F2AL.3a;Y38F2AL.3b | NALASMDRK                | 22  | 9642  | 1.24 | 0.15 | 12 |
| 22 Y38F2AL.3a;Y38F2AL.3b | NALASMDRK                | 36  | 22442 | 1.24 | 0.06 | 5  |
| 22 Y38F2AL.3a;Y38F2AL.3b | VLSEIIGK                 | 58  | 3523  | 1.27 | 0.12 | 10 |
| 7 Y38F2AL.3a;Y38F2AL.3b  | TVGSLLTK                 | 23  | 4167  | 1.29 | 0.13 | 10 |
| 7 Y38F2AL.3a;Y38F2AL.3b  | SLTYNNLK                 | 49  | 9743  | 1.29 | 0.07 | 5  |
| 7 Y38F2AL.3a;Y38F2AL.3b  | IAENLVIGNK               | 65  | 8991  | 1.31 | 0.09 | 7  |
| 10 Y38F2AL.3a;Y38F2AL.3b | LRQELHK                  | 16  | 2688  | 1.32 | 0.05 | 4  |
| 22 Y38F2AL.3a;Y38F2AL.3b | YLIPDLK                  | 29  | 1645  | 1.34 | 0.24 | 18 |
| 22 Y38F2AL.3a;Y38F2AL.3b | TVGSLLTK                 | 51  | 6101  | 1.35 | 0.14 | 10 |
| 7 Y38F2AL.3a;Y38F2AL.3b  | IAENLVIGNK               | 32  | 10031 | 1.36 | 0.07 | 5  |
| 7 Y38F2AL.3a;Y38F2AL.3b  | TVGSLLTK                 | 32  | 1926  | 1.36 | 0.11 | 8  |
| 22 Y38F2AL.3a;Y38F2AL.3b | LNIDFLNK                 | 20  | 2690  | 1.38 | 0.17 | 12 |
| 10 Y38F2AL.3a;Y38F2AL.3b | DLADLVK                  | 11  | 600   | 1.40 | 0.42 | 30 |
| 10 Y38F2AL.3a;Y38F2AL.3b | NALASMDRK                | 24  | 5643  | 1.41 | 0.19 | 14 |
| 10 Y38F2AL.3a;Y38F2AL.3b | LNIDFLNK                 | 23  | 3103  | 1.43 | 0.13 | 9  |
| 10 Y38F2AL.3a;Y38F2AL.3b | TVGSLLTK                 | 19  | 3386  | 1.47 | 0.13 | 9  |
| 22 Y38F2AL.3a;Y38F2AL.3b | FQWEGAK                  | 19  | 540   | 1.53 | 0.20 | 13 |
| 1 Y38F2AL.3a;Y38F2AL.3b  | TVGSLLTK                 | 77  | 3551  | 1.55 | 0.06 | 4  |
| 7 Y38F2AL.3a;Y38F2AL.3b  | VLSEIIGK                 | 17  | 1491  | 1.59 | 0.12 | 8  |
| 10 Y38F2AL.3a;Y38F2AL.3b | VLSEIIGK                 | 71  | 2637  | 1.62 | 0.13 | 8  |
| 1 Y38F2AL.3a;Y38F2AL.3b  | SLTYNNLK                 | 63  | 15394 | 1.66 | 0.11 | 6  |
| 1 Y38F2AL.3a;Y38F2AL.3b  | SLTYNNLK                 | 59  | 15980 | 1.66 | 0.18 | 11 |
| 1 Y38F2AL.3a;Y38F2AL.3b  | TVGSLLTK                 | 53  | 2435  | 1.71 | 0.07 | 4  |
| 7 Y38F2AL.3a;Y38F2AL.3b  | SLTYNNLK                 | 38  | 10225 | 1.72 | 0.11 | 7  |
| 1 Y38F2AL.3a;Y38F2AL.3b  | NALASMDRK                | 39  | 7160  | 1.81 | 0.12 | 7  |
| 1 Y38F2AL.3a;Y38F2AL.3b  | NALASMDRK                | 37  | 5510  | 1.85 | 0.07 | 4  |
| 1 Y38F2AL.3a;Y38F2AL.3b  | LRQELHK                  | 12  | 4130  | 2.03 | 0.06 | 3  |
| 1 Y39B6A.20              | TQPDLIFTIGGAQFPVK        | 31  | 439   | 0.41 | 0.15 | 36 |
| 1 Y39B6A.20              | QVTYVPLSAK               | 49  | 12238 | 0.45 | 0.07 | 16 |
| 22 Y39B6A.20             | TQPDLIFTIGGAQFPVK        | 66  | 1214  | 0.49 | 0.19 | 39 |
| 1 Y39B6A.20              | QVTYVPLSAK               | 38  | 8220  | 0.49 | 0.10 | 21 |
| 1 Y39B6A.20              | TQPDLIFTIGGAQFPVK        | 18  | 325   | 0.50 | 0.10 | 21 |
| 22 Y39B6A.20             | TQPDLIFTIGGAQFPVK        | 57  | 1592  | 0.56 | 0.24 | 42 |
| 22 Y39B6A.20             | QVTYVPLSAK               | 39  | 14526 | 0.57 | 0.16 | 28 |
| 10 Y39B6A.20             | QVTYVPLSAK               | 11  | 2707  | 0.59 | 0.13 | 21 |
| 10 Y39B6A.20             | QVTYVPLSAK               | 19  | 4957  | 0.63 | 0.09 | 14 |
| 22 Y39B6A.20             | QVTYVPLSAK               | 39  | 9101  | 0.63 | 0.22 | 35 |
| 7 Y39B6A.20              | QVTYVPLSAK               | 55  | 8598  | 0.68 | 0.15 | 21 |
| 22 Y39B6A.20             | QVTYVPLSAK               | 25  | 2960  | 0.71 | 0.05 | 6  |
| 22 Y39B6A.20             | DQVISDTGTSWLGAPNTIVSAIVK | 12  | 841   | 0.71 | 0.22 | 31 |
| 10 Y39B6A.20             | QVTYVPLSAK               | 20  | 6509  | 0.71 | 0.08 | 12 |
| 7 Y39B6A.20              | QVTYVPLSAK               | 41  | 9611  | 0.72 | 0.12 | 17 |
| 22 Y39B6A.20             | QVTYVPLSAK               | 26  | 3272  | 0.72 | 0.11 | 15 |
| 22 Y39B6A.20             | TQPDLIFTIGGAQFPVK        | 66  | 2315  | 0.72 | 0.18 | 25 |
| 22 Y39B6A.20             | TQPDLIFTIGGAQFPVK        | 60  | 1764  | 0.72 | 0.18 | 25 |
| 7 Y39B6A.20              | QVTYVPLSAK               | 28  | 3809  | 0.75 | 0.09 | 13 |
| 22 Y39B6A.20             | TQPDLIFTIGGAQFPVK        | 67  | 1365  | 0.76 | 0.10 | 13 |
| 1 Y39B6A.20              | QVTYVPLSAK               | 18  | 1810  | 0.77 | 0.11 | 14 |
| 1 Y39B6A.20              | QVTYVPLSAK               | 19  | 1179  | 0.77 | 0.11 | 15 |
| 10 Y39B6A.20             | FSIQYSGSCNGYLK           | 64  | 2850  | 0.77 | 0.14 | 18 |
| 22 Y39B6A.20             | DQVISDTGTSWLGAPNTIVSAIVK | 45  | 2364  | 0.78 | 0.10 | 14 |
| 7 Y39B6A.20              | QVTYVPLSAK               | 38  | 11978 | 0.80 | 0.14 | 17 |
| 7 Y39B6A.20              | QVTYVPLSAK               | 47  | 17025 | 0.81 | 0.05 | 6  |
| 22 Y39B6A.20             | TQPDLIFTIGGAQFPVK        | 65  | 2016  | 0.82 | 0.10 | 12 |
| 7 Y39B6A.20              | TQPDLIFTIGGAQFPVK        | 72  | 2008  | 0.82 | 0.14 | 17 |
| 10 Y39B6A.20             | TQPDLIFTIGGAQFPVK        | 69  | 3169  | 0.82 | 0.11 | 14 |
| 7 Y39B6A.20              | QVTYVPLSAK               | 15  | 1974  | 0.82 | 0.08 | 10 |
| 10 Y39B6A.20             | TQPDLIFTIGGAQFPVK        | 69  | 2321  | 0.82 | 0.12 | 14 |
| 10 Y39B6A.20             | TQPDLIFTIGGAQFPVK        | 133 | 13951 | 0.83 | 0.10 | 12 |
| 10 Y39B6A.20             | QVTYVPLSAK               | 60  | 14065 | 0.83 | 0.11 | 13 |
| 10 Y39B6A.20             | QVTYVPLSAK               | 14  | 2664  | 0.83 | 0.10 | 12 |
| 1 Y39B6A.20              | TQPDLIFTIGGAQFPVK        | 50  | 1149  | 0.83 | 0.15 | 18 |
| 10 Y39B6A.20             | FSIQYSGSCNGYLK           | 78  | 3499  | 0.84 | 0.10 | 12 |
| 22 Y39B6A.20             | QVTYVPLSAK               | 24  | 1498  | 0.84 | 0.16 | 19 |

|                        |                           |     |        |      |      |    |
|------------------------|---------------------------|-----|--------|------|------|----|
| 7 Y39B6A.20            | FSIQYSGSCNGYL GK          | 59  | 2435   | 0.84 | 0.12 | 14 |
| 10 Y39B6A.20           | QVTYVPLSAK                | 60  | 12349  | 0.85 | 0.12 | 14 |
| 7 Y39B6A.20            | QVTYVPLSAK                | 29  | 3736   | 0.86 | 0.09 | 11 |
| 7 Y39B6A.20            | TQPD LIFTIGGAQFPVK        | 68  | 994    | 0.87 | 0.21 | 24 |
| 7 Y39B6A.20            | TQPD LIFTIGGAQFPVK        | 48  | 1600   | 0.87 | 0.14 | 16 |
| 1 Y39B6A.20            | QVTYVPLSAK                | 29  | 4009   | 0.87 | 0.13 | 15 |
| 10 Y39B6A.20           | QVTYVPLSAK                | 69  | 11020  | 0.88 | 0.12 | 13 |
| 22 Y39B6A.20           | TQPD LIFTIGGAQFPVK        | 40  | 1988   | 0.88 | 0.13 | 15 |
| 1 Y39B6A.20            | QVTYVPLSAK                | 27  | 1657   | 0.88 | 0.14 | 16 |
| 22 Y39B6A.20           | DQVISDTGT SWLGAPNTIVSAIVK | 39  | 2186   | 0.89 | 0.20 | 22 |
| 10 Y39B6A.20           | TQPD LIFTIGGAQFPVK        | 64  | 2026   | 0.89 | 0.09 | 10 |
| 10 Y39B6A.20           | TQPD LIFTIGGAQFPVK        | 22  | 1849   | 0.89 | 0.09 | 10 |
| 7 Y39B6A.20            | QVTYVPLSAK                | 61  | 27740  | 0.90 | 0.11 | 13 |
| 1 Y39B6A.20            | QVTYVPLSAK                | 31  | 4601   | 0.90 | 0.11 | 12 |
| 10 Y39B6A.20           | QVTYVPLSAK                | 57  | 7701   | 0.91 | 0.05 | 5  |
| 10 Y39B6A.20           | TQPD LIFTIGGAQFPVK        | 36  | 721    | 0.94 | 0.20 | 21 |
| 10 Y39B6A.20           | TQPD LIFTIGGAQFPVK        | 114 | 15510  | 0.95 | 0.06 | 7  |
| 1 Y39B6A.20            | TQPD LIFTIGGAQFPVK        | 33  | 506    | 0.96 | 0.11 | 12 |
| 1 Y39B6A.20            | TQPD LIFTIGGAQFPVK        | 55  | 1757   | 0.98 | 0.11 | 11 |
| 10 Y39B6A.20           | TQACNGYPDSGYTK            | 87  | 5769   | 0.99 | 0.10 | 11 |
| 22 Y39B6A.20           | QVTYVPLSAK                | 10  | 1453   | 0.99 | 0.28 | 28 |
| 7 Y39B6A.20            | TQPD LIFTIGGAQFPVK        | 63  | 1378   | 1.00 | 0.15 | 15 |
| 1 Y39B6A.20            | QVTYVPLSAK                | 15  | 3642   | 1.01 | 0.10 | 10 |
| 7 Y39B6A.20            | TQPD LIFTIGGAQFPVK        | 83  | 6979   | 1.01 | 0.06 | 6  |
| 10 Y39B6A.20           | TQPD LIFTIGGAQFPVK        | 15  | 1406   | 1.02 | 0.09 | 9  |
| 10 Y39B6A.20           | TQPD LIFTIGGAQFPVK        | 43  | 1312   | 1.04 | 0.13 | 12 |
| 22 Y39B6A.20           | SVEYVLDLQLGGGK            | 62  | 2215   | 1.05 | 0.12 | 11 |
| 1 Y39B6A.20            | QVTYVPLSAK                | 29  | 5809   | 1.06 | 0.08 | 7  |
| 10 Y39B6A.20           | QVTYVPLSAK                | 11  | 4627   | 1.08 | 0.07 | 7  |
| 22 Y39B6A.20           | QVTYVPLSAK                | 58  | 14993  | 1.08 | 0.05 | 4  |
| 1 Y39B6A.20            | QVTYVPLSAK                | 30  | 3577   | 1.08 | 0.07 | 7  |
| 22 Y39B6A.20           | QVTYVPLSAK                | 29  | 6274   | 1.10 | 0.10 | 9  |
| 22 Y39B6A.20           | TQPD LIFTIGGAQFPVK        | 107 | 45642  | 1.11 | 0.06 | 6  |
| 10 Y39B6A.20           | QVTYVPLSAK                | 64  | 199314 | 1.12 | 0.08 | 7  |
| 7 Y39B6A.20            | TQPD LIFTIGGAQFPVK        | 38  | 873    | 1.12 | 0.22 | 20 |
| 7 Y39B6A.20            | TQPD LIFTIGGAQFPVK        | 82  | 10047  | 1.13 | 0.07 | 6  |
| 10 Y39B6A.20           | TQACNGYPDSGYTK            | 61  | 6646   | 1.14 | 0.13 | 12 |
| 10 Y39B6A.20           | QVTYVPLSAK                | 67  | 198556 | 1.15 | 0.06 | 6  |
| 7 Y39B6A.20            | QVTYVPLSAK                | 39  | 2930   | 1.15 | 0.14 | 12 |
| 7 Y39B6A.20            | TQPD LIFTIGGAQFPVK        | 21  | 1555   | 1.16 | 0.27 | 24 |
| 7 Y39B6A.20            | FSIQYSGSCNGYL GK          | 75  | 5329   | 1.16 | 0.13 | 11 |
| 22 Y39B6A.20           | QVTYVPLSAK                | 13  | 1395   | 1.18 | 0.21 | 18 |
| 22 Y39B6A.20           | TQPD LIFTIGGAQFPVK        | 91  | 35695  | 1.18 | 0.11 | 9  |
| 10 Y39B6A.20           | TQPD LIFTIGGAQFPVK        | 81  | 1501   | 1.19 | 0.18 | 15 |
| 7 Y39B6A.20            | TQACNGYPDSGYTK            | 77  | 7360   | 1.23 | 0.08 | 7  |
| 7 Y39B6A.20            | QVTYVPLSAK                | 30  | 5826   | 1.25 | 0.16 | 13 |
| 22 Y39B6A.20           | TQPD LIFTIGGAQFPVK        | 27  | 761    | 1.25 | 0.14 | 11 |
| 22 Y39B6A.20           | QVTYVPLSAK                | 26  | 4143   | 1.26 | 0.22 | 17 |
| 22 Y39B6A.20           | QVTYVPLSAK                | 52  | 11716  | 1.27 | 0.18 | 14 |
| 10 Y39B6A.20           | QVTYVPLSAK                | 13  | 6433   | 1.29 | 0.10 | 8  |
| 22 Y39B6A.20           | SVEYVLDLQLGGGK            | 64  | 2032   | 1.29 | 0.08 | 6  |
| 22 Y39B6A.20           | QVTYVPLSAK                | 29  | 3681   | 1.29 | 0.09 | 7  |
| 22 Y39B6A.20           | QVTYVPLSAK                | 64  | 248907 | 1.32 | 0.08 | 6  |
| 7 Y39B6A.20            | TQPD LIFTIGGAQFPVK        | 58  | 2591   | 1.32 | 0.14 | 10 |
| 22 Y39B6A.20           | QVTYVPLSAK                | 25  | 3014   | 1.33 | 0.11 | 9  |
| 7 Y39B6A.20            | QVTYVPLSAK                | 23  | 5049   | 1.35 | 0.13 | 10 |
| 22 Y39B6A.20           | QVTYVPLSAK                | 29  | 2948   | 1.35 | 0.08 | 6  |
| 7 Y39B6A.20            | FSIQYSGSCNGYL GK          | 95  | 5308   | 1.36 | 0.16 | 12 |
| 22 Y39B6A.20           | DQVISDTGT SWLGAPNTIVSAIVK | 14  | 1089   | 1.37 | 0.18 | 13 |
| 1 Y39B6A.20            | QVTYVPLSAK                | 33  | 2841   | 1.37 | 0.12 | 9  |
| 22 Y39B6A.20           | QVTYVPLSAK                | 12  | 2557   | 1.37 | 0.19 | 14 |
| 1 Y39B6A.20            | QVTYVPLSAK                | 49  | 3255   | 1.38 | 0.19 | 14 |
| 10 Y39B6A.20           | QVTYVPLSAK                | 19  | 7682   | 1.38 | 0.09 | 6  |
| 7 Y39B6A.20            | TQPD LIFTIGGAQFPVK        | 73  | 4246   | 1.38 | 0.09 | 7  |
| 22 Y39B6A.20           | QVTYVPLSAK                | 71  | 233754 | 1.40 | 0.04 | 3  |
| 22 Y39B6A.20           | QVTYVPLSAK                | 20  | 3418   | 1.40 | 0.13 | 9  |
| 22 Y39B6A.20           | QVTYVPLSAK                | 39  | 3938   | 1.41 | 0.11 | 8  |
| 22 Y39B6A.20           | QVTYVPLSAK                | 32  | 7994   | 1.41 | 0.12 | 8  |
| 10 Y39B6A.20           | TQPD LIFTIGGAQFPVK        | 51  | 1280   | 1.45 | 0.14 | 10 |
| 22 Y39B6A.20           | TQPD LIFTIGGAQFPVK        | 71  | 1435   | 1.46 | 0.13 | 9  |
| 10 Y39B6A.20           | QVTYVPLSAK                | 25  | 9940   | 1.50 | 0.06 | 4  |
| 22 Y39B6A.20           | QVTYVPLSAK                | 16  | 3043   | 1.52 | 0.32 | 21 |
| 22 Y39B6A.20           | FSIQYSGSCNGYL GK          | 82  | 5946   | 1.52 | 0.12 | 8  |
| 22 Y39B6A.20           | TQPD LIFTIGGAQFPVK        | 64  | 1847   | 1.54 | 0.12 | 8  |
| 22 Y39B6A.20           | FSIQYSGSCNGYL GK          | 72  | 5320   | 1.58 | 0.17 | 11 |
| 22 Y39B6A.20           | QVTYVPLSAK                | 16  | 3397   | 1.59 | 0.14 | 9  |
| 7 Y39B6A.20            | QVTYVPLSAK                | 23  | 3390   | 1.59 | 0.11 | 7  |
| 22 Y39B6A.20           | TQPD LIFTIGGAQFPVK        | 27  | 2499   | 1.61 | 0.19 | 12 |
| 22 Y39B6A.20           | QVTYVPLSAK                | 40  | 3467   | 1.61 | 0.05 | 3  |
| 10 Y39B6A.20           | TQPD LIFTIGGAQFPVK        | 50  | 1281   | 1.62 | 0.18 | 11 |
| 22 Y39B6A.20           | TQPD LIFTIGGAQFPVK        | 59  | 4061   | 1.62 | 0.09 | 6  |
| 10 Y39B6A.20           | QVTYVPLSAK                | 36  | 2878   | 1.65 | 0.06 | 4  |
| 22 Y39B6A.20           | TQPD LIFTIGGAQFPVK        | 14  | 3445   | 1.73 | 0.19 | 11 |
| 22 Y39B6A.20           | SVEYVLDLQLGGGK            | 64  | 2093   | 1.76 | 0.21 | 12 |
| 22 Y39B6A.20           | TQPD LIFTIGGAQFPVK        | 24  | 1656   | 1.76 | 0.15 | 9  |
| 22 Y39B6A.20           | TQPD LIFTIGGAQFPVK        | 81  | 6718   | 1.79 | 0.10 | 6  |
| 22 Y39B6A.20           | TQACNGYPDSGYTK            | 74  | 9079   | 1.94 | 0.13 | 7  |
| 10 Y39B6A.20           | QVTYVPLSAK                | 51  | 10559  | 1.96 | 0.08 | 4  |
| 22 Y39B6A.20           | TQACNGYPDSGYTK            | 76  | 6504   | 2.03 | 0.12 | 6  |
| 7 Y39B6A.20            | QVTYVPLSAK                | 21  | 5367   | 2.29 | 0.17 | 7  |
| 7 Y39B6A.20            | QVTYVPLSAK                | 45  | 5314   | 2.34 | 0.14 | 6  |
| 22 Y39B6A.20           | QVTYVPLSAK                | 32  | 3441   | 2.43 | 0.06 | 3  |
| 10 Y39B6A.20           | QVTYVPLSAK                | 17  | 2387   | 2.53 | 0.10 | 4  |
| 10 Y39B6A.20           | QVTYVPLSAK                | 24  | 7970   | 2.57 | 0.08 | 3  |
| 10 Y39B6A.20           | QVTYVPLSAK                | 37  | 5391   | 3.13 | 0.21 | 7  |
| 10 Y39B6A.20           | QVTYVPLSAK                | 50  | 8602   | 3.18 | 0.16 | 5  |
| 10 Y39B6A.20           | TQPD LIFTIGGAQFPVK        | 76  | 986    | 7.13 | 0.23 | 3  |
| 7 Y39E4A.3a;Y39E4A.3b  | RVLTEFAAAEK               | 55  | 1651   | 0.76 | 0.12 | 16 |
| 10 Y39E4A.3a;Y39E4A.3b | RVLTEFAAAEK               | 45  | 2421   | 0.87 | 0.08 | 10 |
| 1 Y39E4A.3a;Y39E4A.3b  | RVLTEFAAAEK               | 23  | 1229   | 0.90 | 0.14 | 16 |
| 22 Y39E4A.3a;Y39E4A.3b | RVLTEFAAAEK               | 21  | 924    | 1.05 | 0.23 | 21 |

|                        |                       |     |       |      |      |     |
|------------------------|-----------------------|-----|-------|------|------|-----|
| 10 Y39E4A.3a;Y39E4A.3b | RVLTEFAAAEK           | 19  | 1154  | 1.51 | 0.14 | 9   |
| 7 Y39E4A.3a;Y39E4A.3b  | RVLTEFAAAEK           | 11  | 1144  | 1.90 | 0.18 | 10  |
| 22 Y39E4A.3a;Y39E4A.3b | RVLTEFAAAEK           | 33  | 1096  | 3.96 | 0.10 | 2   |
| 22 Y39E4A.3a;Y39E4A.3b | RVLTEFAAAEK           | 15  | 757   | 4.32 | 0.12 | 3   |
| 10 Y39E4B.1            | IQNMYEHPQFK           | 55  | 4235  | 1.41 | 0.12 | 8   |
| 10 Y39G8B.1a;Y39G8B.1b | DGDPNVLTNEVVAGIAK     | 75  | 2647  | 0.32 | 0.22 | 71  |
| 10 Y39G8B.1a;Y39G8B.1b | DGDPNVLTNEVVAGIAK     | 69  | 2736  | 0.33 | 0.14 | 43  |
| 10 Y39G8B.1a;Y39G8B.1b | DGDPNVLTNEVVAGIAK     | 51  | 1940  | 0.38 | 0.16 | 43  |
| 22 Y39G8B.1a;Y39G8B.1b | DGDPNVLTNEVVAGIAK     | 68  | 2171  | 0.38 | 0.12 | 30  |
| 22 Y39G8B.1a;Y39G8B.1b | REELFITSK             | 37  | 1390  | 0.41 | 0.25 | 62  |
| 10 Y39G8B.1a;Y39G8B.1b | REELFITSK             | 33  | 2721  | 0.44 | 0.17 | 38  |
| 22 Y39G8B.1a;Y39G8B.1b | MRYSDVDYLETWK         | 40  | 2865  | 0.50 | 0.19 | 38  |
| 10 Y39G8B.1a;Y39G8B.1b | VWNTFHSEAK            | 47  | 4044  | 0.55 | 0.07 | 12  |
| 10 Y39G8B.1a;Y39G8B.1b | REELFITSK             | 17  | 1691  | 0.56 | 0.12 | 21  |
| 1 Y39G8B.1a;Y39G8B.1b  | DGDPNVLTNEVVAGIAK     | 58  | 1828  | 0.61 | 0.10 | 16  |
| 10 Y39G8B.1a;Y39G8B.1b | VWNTFHSEAK            | 21  | 3235  | 0.62 | 0.12 | 20  |
| 7 Y39G8B.1a;Y39G8B.1b  | REELFITSK             | 33  | 1889  | 0.63 | 0.08 | 12  |
| 10 Y39G8B.1a;Y39G8B.1b | MRYSDVDYLETWK         | 16  | 1314  | 0.66 | 0.26 | 39  |
| 10 Y39G8B.1a;Y39G8B.1b | DGDPNVLTNEVVAGIAK     | 50  | 1968  | 0.67 | 0.21 | 31  |
| 22 Y39G8B.1a;Y39G8B.1b | VWNTFHSEAK            | 30  | 2661  | 0.68 | 0.09 | 14  |
| 7 Y39G8B.1a;Y39G8B.1b  | REELFITSK             | 23  | 1774  | 0.69 | 0.15 | 22  |
| 22 Y39G8B.1a;Y39G8B.1b | MRYSDVDYLETWK         | 25  | 1879  | 0.70 | 0.30 | 42  |
| 22 Y39G8B.1a;Y39G8B.1b | REELFITSK             | 25  | 2551  | 0.72 | 0.16 | 23  |
| 7 Y39G8B.1a;Y39G8B.1b  | DGDPNVLTNEVVAGIAK     | 68  | 3967  | 0.72 | 0.12 | 16  |
| 1 Y39G8B.1a;Y39G8B.1b  | DGDPNVLTNEVVAGIAK     | 70  | 1785  | 0.73 | 0.09 | 13  |
| 10 Y39G8B.1a;Y39G8B.1b | MRYSDVDYLETWK         | 13  | 3853  | 0.74 | 0.08 | 10  |
| 7 Y39G8B.1a;Y39G8B.1b  | REELFITSK             | 33  | 2191  | 0.76 | 0.13 | 17  |
| 22 Y39G8B.1a;Y39G8B.1b | VWNTFHSEAK            | 17  | 1138  | 0.76 | 0.23 | 30  |
| 1 Y39G8B.1a;Y39G8B.1b  | VWNTFHSEAK            | 12  | 1342  | 0.80 | 0.24 | 30  |
| 22 Y39G8B.1a;Y39G8B.1b | REELFITSK             | 26  | 1994  | 0.89 | 0.20 | 22  |
| 22 Y39G8B.1a;Y39G8B.1b | VWNTFHSEAK            | 54  | 3452  | 1.07 | 0.12 | 12  |
| 7 Y39G8B.1a;Y39G8B.1b  | VWNTFHSEAK            | 27  | 3616  | 1.09 | 0.15 | 13  |
| 22 Y39G8B.1a;Y39G8B.1b | VWNTFHSEAK            | 47  | 3596  | 1.23 | 0.17 | 14  |
| 7 Y39G8B.1a;Y39G8B.1b  | MRYSDVDYLETWK         | 13  | 1596  | 1.38 | 0.08 | 6   |
| 7 Y39G8B.1a;Y39G8B.1b  | VWNTFHSEAK            | 31  | 2283  | 1.39 | 0.10 | 7   |
| 10 Y39G8B.1a;Y39G8B.1b | VWNTFHSEAK            | 23  | 4082  | 1.78 | 0.13 | 8   |
| 7 Y39G8B.1a;Y39G8B.1b  | MRYSDVDYLETWK         | 17  | 3444  | 1.97 | 0.15 | 7   |
| 10 Y39G8B.1a;Y39G8B.1b | MRYSDVDYLETWK         | 14  | 1799  | 2.20 | 0.06 | 3   |
| 10 Y40B10A.2           | IRAIEGSALDGLDK        | 38  | 3521  | 0.62 | 0.32 | 51  |
| 22 Y40B10A.2           | IRAIEGSALDGLDK        | 30  | 2556  | 1.13 | 0.15 | 13  |
| 22 Y40B10A.2           | IRAIEGSALDGLDK        | 30  | 2571  | 1.13 | 0.18 | 16  |
| 10 Y40B10A.2           | IRAIEGSALDGLDK        | 23  | 2788  | 2.43 | 0.16 | 7   |
| 7 Y40B10A.2            | IRAIEGSALDGLDK        | 22  | 2442  | 2.99 | 0.18 | 6   |
| 7 Y41D4B.11            | NAVLAQAEELGMK         | 13  | 2361  | 1.18 | 0.42 | 36  |
| 7 Y41E3.10a            | LIPIGYGIK             | 18  | 4567  | 0.13 | 0.22 | 167 |
| 10 Y41E3.10a           | LVRSIEMDGLVWGGAK      | 32  | 5267  | 0.24 | 0.15 | 63  |
| 10 Y41E3.10a           | LIPIGYGIK             | 46  | 15343 | 0.28 | 0.29 | 104 |
| 22 Y41E3.10a           | LVRSIEMDGLVWGGAK      | 23  | 1763  | 0.29 | 0.21 | 71  |
| 10 Y41E3.10a           | LVRSIEMDGLVWGGAK      | 32  | 5149  | 0.30 | 0.23 | 75  |
| 22 Y41E3.10a           | LVRSIEMDGLVWGGAK      | 38  | 3414  | 0.33 | 0.28 | 85  |
| 10 Y41E3.10a           | LVRSIEMDGLVWGGAK      | 24  | 5137  | 0.33 | 0.25 | 75  |
| 10 Y41E3.10a           | LVRSIEMDGLVWGGAK      | 27  | 5536  | 0.34 | 0.20 | 58  |
| 22 Y41E3.10a           | VSVDDLIEK             | 38  | 6806  | 0.34 | 0.22 | 66  |
| 22 Y41E3.10a           | LIPIGYGIK             | 45  | 24023 | 0.35 | 0.19 | 55  |
| 10 Y41E3.10a           | LQIITVIEDLK           | 76  | 2670  | 0.35 | 0.09 | 26  |
| 10 Y41E3.10a           | LQIITVIEDLK           | 102 | 3370  | 0.36 | 0.11 | 32  |
| 7 Y41E3.10a            | LIPIGYGIK             | 19  | 4734  | 0.37 | 0.15 | 42  |
| 22 Y41E3.10a           | LVRSIEMDGLVWGGAK      | 14  | 1206  | 0.38 | 0.32 | 84  |
| 22 Y41E3.10a           | LIPIGYGIK             | 27  | 7132  | 0.39 | 0.11 | 29  |
| 22 Y41E3.10a           | LIPIGYGIK             | 57  | 21817 | 0.39 | 0.20 | 51  |
| 7 Y41E3.10a            | VSVDDLIEK             | 36  | 5655  | 0.40 | 0.06 | 16  |
| 22 Y41E3.10a           | VSVDDLIEK             | 17  | 2426  | 0.40 | 0.18 | 45  |
| 10 Y41E3.10a           | LVRSIEMDGLVWGGAK      | 32  | 1642  | 0.43 | 0.06 | 14  |
| 10 Y41E3.10a           | LVRSIEMDGLVWGGAK      | 47  | 2011  | 0.43 | 0.11 | 26  |
| 10 Y41E3.10a           | LVRSIEMDGLVWGGAK      | 17  | 1331  | 0.45 | 0.15 | 33  |
| 22 Y41E3.10a           | VSVDDLIEK             | 34  | 7587  | 0.47 | 0.13 | 28  |
| 7 Y41E3.10a            | VSVDDLIEK             | 34  | 5916  | 0.47 | 0.16 | 34  |
| 1 Y41E3.10a            | VSVDDLIEK             | 16  | 1770  | 0.48 | 0.04 | 8   |
| 22 Y41E3.10a           | LQIITVIEDLK           | 79  | 2868  | 0.48 | 0.14 | 30  |
| 10 Y41E3.10a           | VSVDDLIEK             | 35  | 7144  | 0.49 | 0.15 | 32  |
| 10 Y41E3.10a           | LIPIGYGIK             | 34  | 17120 | 0.49 | 0.14 | 28  |
| 7 Y41E3.10a            | LIPIGYGIK             | 26  | 5020  | 0.50 | 0.22 | 44  |
| 10 Y41E3.10a           | VSVDDLIEK             | 38  | 7983  | 0.50 | 0.13 | 26  |
| 22 Y41E3.10a           | VVEERLAAYAAK          | 20  | 2377  | 0.54 | 0.32 | 58  |
| 22 Y41E3.10a           | LQIITVIEDLK           | 69  | 3176  | 0.55 | 0.20 | 35  |
| 10 Y41E3.10a           | VSVDDLIEK             | 15  | 13067 | 0.56 | 0.07 | 13  |
| 22 Y41E3.10a           | LVRSIEMDGLVWGGAK      | 29  | 2657  | 0.56 | 0.16 | 29  |
| 10 Y41E3.10a           | LIPIGYGIK             | 37  | 15610 | 0.58 | 0.12 | 20  |
| 22 Y41E3.10a           | VVEERLAAYAAK          | 35  | 12515 | 0.61 | 0.16 | 26  |
| 10 Y41E3.10a           | VSVDDLIEK             | 33  | 11717 | 0.63 | 0.11 | 17  |
| 7 Y41E3.10a            | VVEERLAAYAAK          | 24  | 4111  | 0.65 | 0.12 | 18  |
| 10 Y41E3.10a           | LIPIGYGIK             | 38  | 9824  | 0.66 | 0.33 | 49  |
| 7 Y41E3.10a            | VVEERLAAYAAK          | 29  | 5079  | 0.66 | 0.12 | 19  |
| 1 Y41E3.10a            | VVEERLAAYAAK          | 32  | 5513  | 0.69 | 0.11 | 15  |
| 10 Y41E3.10a           | LIPIGYGIK             | 22  | 3163  | 0.70 | 0.18 | 26  |
| 1 Y41E3.10a            | VVEERLAAYAAK          | 14  | 4504  | 0.78 | 0.09 | 12  |
| 22 Y41E3.10a           | LIPIGYGIK             | 23  | 3781  | 0.81 | 0.28 | 35  |
| 22 Y41E3.10a           | LIPIGYGIK             | 37  | 13019 | 0.82 | 0.11 | 14  |
| 22 Y41E3.10a           | VVEERLAAYAAK          | 38  | 8367  | 0.83 | 0.22 | 27  |
| 10 Y41E3.10a           | VVEERLAAYAAK          | 41  | 10037 | 0.86 | 0.36 | 42  |
| 22 Y41E3.10a           | LVRSIEMDGLVWGGAK      | 14  | 1908  | 0.87 | 0.17 | 20  |
| 22 Y41E3.10a           | LIPIGYGIK             | 55  | 17111 | 0.90 | 0.09 | 10  |
| 10 Y41E3.10a           | LIPIGYGIK             | 53  | 19557 | 0.92 | 0.07 | 7   |
| 10 Y41E3.10a           | LIPIGYGIK             | 46  | 18592 | 0.97 | 0.09 | 9   |
| 22 Y41E3.10a           | LIPIGYGIK             | 24  | 4675  | 0.98 | 0.20 | 20  |
| 22 Y41E3.10a           | LIPIGYGIK             | 20  | 3039  | 0.98 | 0.16 | 16  |
| 22 Y41E3.10a           | LVRSIEMDGLVWGGAK      | 23  | 7763  | 1.01 | 0.12 | 12  |
| 10 Y41E3.10a           | SSVILDVKPWDDETDLGEMEK | 38  | 2768  | 1.06 | 0.22 | 21  |
| 22 Y41E3.10a           | LVRSIEMDGLVWGGAK      | 16  | 7917  | 1.10 | 0.18 | 16  |
| 22 Y41E3.10a           | VSVDDLIEK             | 43  | 17462 | 1.10 | 0.10 | 9   |
| 10 Y41E3.10a           | VVEERLAAYAAK          | 37  | 14687 | 1.11 | 0.18 | 16  |

|                      |                       |    |       |      |      |    |
|----------------------|-----------------------|----|-------|------|------|----|
| 22 Y41E3.10a         | LVRSIEMDGLVWGGAK      | 29 | 2553  | 1.15 | 0.16 | 14 |
| 7 Y41E3.10a          | LIPIGYGIK             | 12 | 3504  | 1.20 | 0.21 | 18 |
| 10 Y41E3.10a         | SSVILDVKPWDDETDLGEMEK | 72 | 3125  | 1.27 | 0.15 | 11 |
| 22 Y41E3.10a         | VSVDDLIEK             | 48 | 18129 | 1.28 | 0.08 | 6  |
| 10 Y41E3.10a         | LIPIGYGIK             | 16 | 4052  | 1.38 | 0.18 | 13 |
| 7 Y41E3.10a          | VSVDDLIEK             | 46 | 4650  | 1.41 | 0.10 | 7  |
| 22 Y41E3.10a         | ITGDFEDHVQSVDIVAFNK   | 15 | 2256  | 1.47 | 0.09 | 6  |
| 22 Y41E3.10a         | LVRSIEMDGLVWGGAK      | 44 | 2456  | 1.50 | 0.14 | 9  |
| 7 Y41E3.10a          | VSVDDLIEK             | 38 | 5687  | 1.54 | 0.14 | 9  |
| 7 Y41E3.10a          | LIPIGYGIK             | 20 | 4336  | 1.55 | 0.12 | 8  |
| 10 Y41E3.10a         | LQIITVIEDLK           | 73 | 2066  | 1.62 | 0.08 | 5  |
| 22 Y41E3.10a         | LQIITVIEDLK           | 78 | 5830  | 1.62 | 0.07 | 4  |
| 10 Y41E3.10a         | LQIITVIEDLK           | 69 | 1973  | 1.82 | 0.11 | 6  |
| 22 Y41E3.10a         | LQIITVIEDLK           | 71 | 5224  | 1.89 | 0.07 | 4  |
| 22 Y41E3.10a         | LIPIGYGIK             | 20 | 3287  | 1.91 | 0.14 | 7  |
| 10 Y41E3.10a         | LVRSIEMDGLVWGGAK      | 18 | 1337  | 1.92 | 0.24 | 12 |
| 10 Y41E3.4a;Y41E3.4c | DAEGHVTEVVVK          | 55 | 8116  | 0.41 | 0.11 | 27 |
| 1 Y41E3.4a;Y41E3.4c  | GLAFVCHQK             | 14 | 1243  | 0.47 | 0.16 | 35 |
| 10 Y41E3.4a;Y41E3.4c | DAEGHVTEVVVK          | 51 | 8120  | 0.51 | 0.14 | 27 |
| 7 Y41E3.4a;Y41E3.4c  | YIMNDGIK              | 15 | 1174  | 0.56 | 0.11 | 19 |
| 7 Y41E3.4a;Y41E3.4c  | LKPQVAAHTPLVVK        | 13 | 2649  | 0.59 | 0.34 | 57 |
| 22 Y41E3.4a;Y41E3.4c | DAEGHVTEVVVK          | 52 | 7216  | 0.64 | 0.15 | 23 |
| 22 Y41E3.4a;Y41E3.4c | LKPQVAAHTPLVVK        | 17 | 11660 | 0.69 | 0.18 | 27 |
| 7 Y41E3.4a;Y41E3.4c  | LTETIGSIVK            | 66 | 2518  | 0.70 | 0.12 | 17 |
| 10 Y41E3.4a;Y41E3.4c | EELLSGLSDSK           | 37 | 1332  | 0.76 | 0.07 | 9  |
| 1 Y41E3.4a;Y41E3.4c  | LKPQVAAHTPLVVK        | 17 | 7049  | 0.78 | 0.25 | 32 |
| 7 Y41E3.4a;Y41E3.4c  | LKPQVAAHTPLVVK        | 21 | 5639  | 0.81 | 0.31 | 38 |
| 22 Y41E3.4a;Y41E3.4c | EELLSGLSDSK           | 27 | 1088  | 0.83 | 0.23 | 28 |
| 1 Y41E3.4a;Y41E3.4c  | EELLSGLSDSK           | 43 | 693   | 0.84 | 0.22 | 27 |
| 7 Y41E3.4a;Y41E3.4c  | LTETIGSIVK            | 54 | 1784  | 0.92 | 0.24 | 26 |
| 1 Y41E3.4a;Y41E3.4c  | LKPQVAAHTPLVVK        | 23 | 7608  | 0.92 | 0.33 | 35 |
| 10 Y41E3.4a;Y41E3.4c | LTETIGSIVK            | 44 | 2430  | 0.93 | 0.17 | 19 |
| 1 Y41E3.4a;Y41E3.4c  | EELLSGLSDSK           | 56 | 634   | 0.94 | 0.13 | 14 |
| 22 Y41E3.4a;Y41E3.4c | DAEGHVTEVVVK          | 58 | 6991  | 0.95 | 0.16 | 17 |
| 1 Y41E3.4a;Y41E3.4c  | LTETIGSIVK            | 27 | 693   | 0.99 | 0.23 | 23 |
| 22 Y41E3.4a;Y41E3.4c | EVDLRFLELLGPK         | 44 | 2336  | 1.01 | 0.13 | 13 |
| 22 Y41E3.4a;Y41E3.4c | EELLSGLSDSK           | 40 | 1173  | 1.02 | 0.13 | 12 |
| 10 Y41E3.4a;Y41E3.4c | EELLSGLSDSK           | 46 | 1119  | 1.04 | 0.17 | 17 |
| 22 Y41E3.4a;Y41E3.4c | LTETIGSIVK            | 96 | 3448  | 1.05 | 0.14 | 13 |
| 7 Y41E3.4a;Y41E3.4c  | LKPQVAAHTPLVVK        | 11 | 6237  | 1.15 | 0.22 | 19 |
| 22 Y41E3.4a;Y41E3.4c | LTETIGSIVK            | 74 | 2464  | 1.16 | 0.15 | 13 |
| 22 Y41E3.4a;Y41E3.4c | EELLSGLSDSK           | 64 | 1522  | 1.18 | 0.30 | 25 |
| 22 Y41E3.4a;Y41E3.4c | IVAERYSPAGK           | 33 | 4706  | 1.19 | 0.10 | 9  |
| 7 Y41E3.4a;Y41E3.4c  | GTLLYQLATK            | 34 | 770   | 1.22 | 0.07 | 6  |
| 10 Y41E3.4a;Y41E3.4c | GTLLYQLATK            | 39 | 2123  | 1.24 | 0.09 | 7  |
| 1 Y41E3.4a;Y41E3.4c  | LTETIGSIVK            | 45 | 809   | 1.24 | 0.21 | 17 |
| 10 Y41E3.4a;Y41E3.4c | LTETIGSIVK            | 46 | 1898  | 1.25 | 0.18 | 15 |
| 22 Y41E3.4a;Y41E3.4c | IVAERYSPAGK           | 45 | 5715  | 1.28 | 0.08 | 7  |
| 10 Y41E3.4a;Y41E3.4c | LKPQVAAHTPLVVK        | 18 | 26408 | 1.32 | 0.20 | 15 |
| 10 Y41E3.4a;Y41E3.4c | IVAERYSPAGK           | 32 | 5036  | 1.37 | 0.09 | 7  |
| 7 Y41E3.4a;Y41E3.4c  | LTETIGSIVK            | 16 | 1121  | 1.37 | 0.19 | 14 |
| 7 Y41E3.4a;Y41E3.4c  | GTLLYQLATK            | 29 | 624   | 1.40 | 0.18 | 13 |
| 7 Y41E3.4a;Y41E3.4c  | IVAERYSPAGK           | 13 | 2110  | 1.42 | 0.13 | 9  |
| 10 Y41E3.4a;Y41E3.4c | IVAERYSPAGK           | 29 | 4040  | 1.57 | 0.11 | 7  |
| 7 Y41E3.4a;Y41E3.4c  | LTETIGSIVK            | 24 | 964   | 1.59 | 0.16 | 10 |
| 10 Y41E3.4a;Y41E3.4c | LKPQVAAHTPLVVK        | 25 | 22574 | 1.64 | 0.06 | 4  |
| 22 Y41E3.4a;Y41E3.4c | EVDLRFLELLGPK         | 26 | 2269  | 2.19 | 0.23 | 10 |
| 22 Y43B11AR.4        | YALNYTEAK             | 30 | 7066  | 0.52 | 0.15 | 28 |
| 10 Y43B11AR.4        | YALNYTEAK             | 20 | 6000  | 0.70 | 0.09 | 13 |
| 1 Y43B11AR.4         | VNDTIVFNISTQK         | 33 | 1476  | 0.71 | 0.19 | 27 |
| 10 Y43B11AR.4        | YALNYTEAK             | 24 | 6316  | 0.72 | 0.04 | 5  |
| 10 Y43B11AR.4        | VNDTIVFNISTQK         | 19 | 2364  | 0.74 | 0.09 | 12 |
| 10 Y43B11AR.4        | LGGVFAVRPNPGPHK       | 30 | 2133  | 0.78 | 0.13 | 17 |
| 10 Y43B11AR.4        | RLAAPSHWMLDK          | 31 | 24275 | 1.08 | 0.12 | 11 |
| 10 Y43B11AR.4        | DSAGHSFATRISNVFVIGK   | 11 | 7519  | 1.57 | 0.16 | 10 |
| 1 Y43B11AR.4         | LGGVFAVRPNPGPHK       | 37 | 15946 | 1.69 | 0.18 | 11 |
| 10 Y43B11AR.4        | GRYVVHRIQAAEADFK      | 15 | 5673  | 2.49 | 0.23 | 9  |
| 10 Y43B11AR.4        | LGGVFAVRPNPGPHK       | 41 | 37930 | 2.71 | 0.16 | 6  |
| 10 Y43B11AR.4        | LGGVFAVRPNPGPHK       | 25 | 24379 | 2.97 | 0.15 | 5  |
| 1 Y43F4B.5a          | VLTLAMETADK           | 19 | 379   | 0.30 | 0.21 | 69 |
| 1 Y43F4B.5a          | TIADAEGFK             | 13 | 902   | 0.31 | 0.18 | 57 |
| 22 Y43F4B.5a         | VYILNSAVSSQIVK        | 62 | 1573  | 0.32 | 0.11 | 35 |
| 22 Y43F4B.5a         | VYILNSAVSSQIVK        | 54 | 1659  | 0.35 | 0.07 | 21 |
| 10 Y43F4B.5a         | TIADAEGFK             | 22 | 2185  | 0.36 | 0.17 | 47 |
| 10 Y43F4B.5a         | TIADAEGFK             | 34 | 2110  | 0.41 | 0.20 | 48 |
| 10 Y43F4B.5a         | DVVATLLRPQQFGLIPRK    | 37 | 3073  | 0.42 | 0.18 | 42 |
| 1 Y43F4B.5a          | VLTLAMETADK           | 49 | 586   | 0.44 | 0.17 | 38 |
| 1 Y43F4B.5a          | VLTLAMETADK           | 20 | 439   | 0.45 | 0.30 | 66 |
| 1 Y43F4B.5a          | VLTLAMETADK           | 12 | 572   | 0.46 | 0.10 | 21 |
| 1 Y43F4B.5a          | VLTLAMETADK           | 19 | 429   | 0.50 | 0.15 | 30 |
| 10 Y43F4B.5a         | TIADAEGFK             | 23 | 3753  | 0.50 | 0.16 | 33 |
| 10 Y43F4B.5a         | LFSTLRADLK            | 12 | 2163  | 0.51 | 0.12 | 23 |
| 10 Y43F4B.5a         | DVVATLLRPQQFGLIPRK    | 10 | 2293  | 0.52 | 0.31 | 59 |
| 10 Y43F4B.5a         | NETTLTGFK             | 27 | 3299  | 0.52 | 0.35 | 68 |
| 10 Y43F4B.5a         | TIADAEGFK             | 46 | 7159  | 0.53 | 0.08 | 16 |
| 10 Y43F4B.5a         | NETTLTGFK             | 47 | 5446  | 0.55 | 0.08 | 14 |
| 10 Y43F4B.5a         | VLTLAMETADK           | 59 | 851   | 0.55 | 0.14 | 25 |
| 22 Y43F4B.5a         | YYIELITAPGK           | 14 | 1862  | 0.58 | 0.14 | 24 |
| 1 Y43F4B.5a          | VLTLAMETADK           | 34 | 467   | 0.59 | 0.08 | 13 |
| 1 Y43F4B.5a          | VYILNSAVSSQIVK        | 49 | 494   | 0.60 | 0.24 | 39 |
| 22 Y43F4B.5a         | VLTLAMETADK           | 49 | 1266  | 0.60 | 0.19 | 32 |
| 10 Y43F4B.5a         | VLTLAMETADK           | 41 | 1115  | 0.64 | 0.10 | 15 |
| 10 Y43F4B.5a         | VYILNSAVSSQIVK        | 38 | 816   | 0.65 | 0.14 | 21 |
| 10 Y43F4B.5a         | VLTLAMETADK           | 66 | 1222  | 0.66 | 0.18 | 28 |
| 22 Y43F4B.5a         | TIADAEGFK             | 22 | 2034  | 0.66 | 0.17 | 26 |
| 1 Y43F4B.5a          | VYILNSAVSSQIVK        | 54 | 629   | 0.68 | 0.07 | 10 |
| 10 Y43F4B.5a         | NETTLTGFK             | 17 | 1815  | 0.70 | 0.31 | 45 |
| 1 Y43F4B.5a          | VLTLAMETADK           | 39 | 566   | 0.70 | 0.22 | 31 |
| 7 Y43F4B.5a          | VLTLAMETADK           | 15 | 504   | 0.71 | 0.19 | 27 |
| 7 Y43F4B.5a          | VLTLAMETADK           | 11 | 402   | 0.74 | 0.15 | 21 |
| 10 Y43F4B.5a         | VYILNSAVSSQIVK        | 60 | 942   | 0.76 | 0.14 | 18 |

|               |                      |    |        |      |      |    |
|---------------|----------------------|----|--------|------|------|----|
| 22 Y43F4B.5a  | YYIELITAPGK          | 22 | 2188   | 0.77 | 0.07 | 9  |
| 22 Y43F4B.5a  | VLTLAMETADK          | 66 | 1220   | 0.77 | 0.11 | 14 |
| 22 Y43F4B.5a  | SSPLFHSADVVIDPYFEVEK | 46 | 1489   | 0.79 | 0.11 | 13 |
| 10 Y43F4B.5a  | QVADWLAWDK           | 63 | 2371   | 0.79 | 0.13 | 16 |
| 22 Y43F4B.5a  | TIADAEGFK            | 20 | 2276   | 0.80 | 0.09 | 12 |
| 10 Y43F4B.5a  | VLTLAMETADK          | 39 | 1062   | 0.85 | 0.26 | 31 |
| 22 Y43F4B.5a  | DVVATLLRPQQFGLIPRK   | 14 | 2373   | 0.86 | 0.08 | 9  |
| 22 Y43F4B.5a  | VLTLAMETADK          | 55 | 1814   | 0.86 | 0.14 | 16 |
| 22 Y43F4B.5a  | VLTLAMETADK          | 59 | 2035   | 0.87 | 0.11 | 12 |
| 22 Y43F4B.5a  | QVADWLAWDK           | 84 | 2175   | 0.87 | 0.15 | 17 |
| 7 Y43F4B.5a   | VLTLAMETADK          | 41 | 748    | 0.89 | 0.16 | 18 |
| 10 Y43F4B.5a  | QVADWLAWDK           | 67 | 2499   | 0.93 | 0.13 | 14 |
| 10 Y43F4B.5a  | LFSTLRADLK           | 14 | 2094   | 0.94 | 0.14 | 15 |
| 10 Y43F4B.5a  | NETTLTGFK            | 72 | 5883   | 0.97 | 0.15 | 15 |
| 22 Y43F4B.5a  | VYILNSAVSSQIVK       | 25 | 652    | 0.97 | 0.31 | 31 |
| 22 Y43F4B.5a  | QVADWLAWDK           | 65 | 1802   | 1.02 | 0.09 | 9  |
| 1 Y43F4B.5a   | VLTLAMETADK          | 55 | 686    | 1.03 | 0.14 | 14 |
| 22 Y43F4B.5a  | NETTLTGFK            | 59 | 4864   | 1.11 | 0.10 | 9  |
| 10 Y43F4B.5a  | TGSVTTLRASGTEPK      | 31 | 7507   | 1.12 | 0.09 | 8  |
| 22 Y43F4B.5a  | NETTLTGFK            | 43 | 3429   | 1.13 | 0.08 | 7  |
| 10 Y43F4B.5a  | YYIELITAPGK          | 13 | 3732   | 1.16 | 0.17 | 15 |
| 22 Y43F4B.5a  | TIADAEGFK            | 57 | 7610   | 1.19 | 0.06 | 5  |
| 22 Y43F4B.5a  | TIADAEGFK            | 50 | 5423   | 1.23 | 0.11 | 9  |
| 10 Y43F4B.5a  | VLTLAMETADK          | 59 | 1987   | 1.23 | 0.17 | 14 |
| 7 Y43F4B.5a   | VYILNSAVSSQIVK       | 42 | 1220   | 1.24 | 0.15 | 12 |
| 10 Y43F4B.5a  | SLNFTREINGSTPLK      | 13 | 2063   | 1.31 | 0.13 | 10 |
| 10 Y43F4B.5a  | TGSVTTLRASGTEPK      | 34 | 8088   | 1.34 | 0.08 | 6  |
| 10 Y43F4B.5a  | SLNFTREINGSTPLK      | 33 | 2585   | 1.38 | 0.11 | 8  |
| 7 Y43F4B.5a   | VYILNSAVSSQIVK       | 30 | 773    | 1.38 | 0.20 | 14 |
| 22 Y43F4B.5a  | TGSVTTLRASGTEPK      | 40 | 6609   | 1.39 | 0.13 | 9  |
| 1 Y43F4B.5a   | YYIELITAPGK          | 23 | 912    | 1.40 | 0.09 | 6  |
| 22 Y43F4B.5a  | TGSVTTLRASGTEPK      | 35 | 7359   | 1.43 | 0.17 | 12 |
| 10 Y43F4B.5a  | VLTLAMETADK          | 54 | 1734   | 1.54 | 0.11 | 7  |
| 22 Y43F4B.5a  | VYILNSAVSSQIVK       | 37 | 617    | 1.59 | 0.19 | 12 |
| 22 Y43F4B.5a  | VYILNSAVSSQIVK       | 57 | 837    | 1.65 | 0.10 | 6  |
| 22 Y43F4B.5a  | SLNFTREINGSTPLK      | 16 | 1961   | 1.66 | 0.14 | 8  |
| 22 Y43F4B.5a  | SLNFTREINGSTPLK      | 28 | 2345   | 1.70 | 0.12 | 7  |
| 22 Y43F4B.5a  | VLTLAMETADK          | 11 | 493    | 1.74 | 0.17 | 10 |
| 22 Y43F4B.5a  | VYILNSAVSSQIVK       | 70 | 1034   | 1.80 | 0.15 | 8  |
| 1 Y43F4B.5a   | VYILNSAVSSQIVK       | 70 | 668    | 1.90 | 0.04 | 2  |
| 22 Y43F4B.5a  | SLNFTREINGSTPLK      | 12 | 1664   | 1.91 | 0.10 | 5  |
| 1 Y43F4B.5a   | VYILNSAVSSQIVK       | 49 | 590    | 1.99 | 0.09 | 4  |
| 22 Y43F4B.5a  | VYILNSAVSSQIVK       | 40 | 927    | 2.45 | 0.08 | 3  |
| 10 Y43F4B.5a  | VYILNSAVSSQIVK       | 74 | 1934   | 2.61 | 0.19 | 7  |
| 10 Y43F4B.5a  | VYILNSAVSSQIVK       | 61 | 1306   | 3.04 | 0.23 | 8  |
| 22 Y43F8C.13  | THDASVDFAHLK         | 50 | 19252  | 0.83 | 0.32 | 39 |
| 22 Y43F8C.13  | THDASVDFAHLK         | 49 | 17504  | 0.83 | 0.22 | 27 |
| 7 Y43F8C.13   | THDASVDFAHLK         | 43 | 17431  | 0.89 | 0.22 | 25 |
| 10 Y43F8C.13  | THDASVDFAHLK         | 56 | 29045  | 0.90 | 0.30 | 34 |
| 1 Y43F8C.13   | THDASVDFAHLK         | 42 | 16277  | 0.92 | 0.18 | 20 |
| 7 Y43F8C.13   | THDASVDFAHLK         | 15 | 3257   | 0.92 | 0.27 | 30 |
| 1 Y43F8C.13   | THDASVDFAHLK         | 27 | 16196  | 1.18 | 0.23 | 20 |
| 10 Y43F8C.13  | THDASVDFAHLK         | 38 | 23919  | 1.24 | 0.24 | 19 |
| 10 Y43F8C.13  | THDASVDFAHLK         | 21 | 6956   | 1.91 | 0.21 | 11 |
| 10 Y43F8C.13  | THDASVDFAHLK         | 17 | 7458   | 1.97 | 0.19 | 10 |
| 22 Y43F8C.13  | THDASVDFAHLK         | 20 | 5413   | 3.08 | 0.14 | 5  |
| 22 Y43F8C.13  | THDASVDFAHLK         | 20 | 6950   | 3.42 | 0.14 | 4  |
| 10 Y45F10D.12 | LYAFLARRTGEK         | 12 | 15815  | 0.26 | 0.20 | 77 |
| 10 Y45F10D.12 | FNAIVLK              | 63 | 13788  | 0.33 | 0.06 | 17 |
| 10 Y45F10D.12 | SENPYLRLLSK          | 22 | 7290   | 0.45 | 0.39 | 88 |
| 10 Y45F10D.12 | FNAIVLK              | 52 | 8549   | 0.49 | 0.14 | 30 |
| 1 Y45F10D.12  | FNAIVLK              | 51 | 4925   | 0.51 | 0.10 | 19 |
| 7 Y45F10D.12  | FNAIVLK              | 44 | 8255   | 0.51 | 0.09 | 17 |
| 10 Y45F10D.12 | TVVTLSTVTDDARLYTPK   | 49 | 6046   | 0.67 | 0.17 | 25 |
| 10 Y45F10D.12 | SENPYLRLLSK          | 21 | 5335   | 0.68 | 0.35 | 52 |
| 10 Y45F10D.12 | TVVTLSTVTDDARLYTPK   | 57 | 4800   | 0.72 | 0.18 | 25 |
| 10 Y45F10D.12 | LARAVQK              | 16 | 19512  | 0.74 | 0.10 | 13 |
| 22 Y45F10D.12 | FNAIVLK              | 73 | 11118  | 0.75 | 0.11 | 15 |
| 22 Y45F10D.12 | FNAIVLK              | 72 | 33496  | 0.76 | 0.07 | 9  |
| 10 Y45F10D.12 | TVVTLSTVTDDARLYTPK   | 46 | 38401  | 0.77 | 0.17 | 23 |
| 22 Y45F10D.12 | LARAVQK              | 13 | 18398  | 0.81 | 0.15 | 18 |
| 10 Y45F10D.12 | TVVTLSTVTDDARLYTPK   | 58 | 38169  | 0.84 | 0.11 | 13 |
| 7 Y45F10D.12  | SENPYLRLLSK          | 32 | 4627   | 0.85 | 0.20 | 23 |
| 10 Y45F10D.12 | LARAVQK              | 17 | 20367  | 0.95 | 0.30 | 31 |
| 10 Y45F10D.12 | TVVTLSTVTDDARLYTPK   | 68 | 1829   | 0.96 | 0.24 | 25 |
| 22 Y45F10D.12 | TVVTLSTVTDDARLYTPK   | 58 | 25781  | 0.97 | 0.11 | 12 |
| 22 Y45F10D.12 | TVVTLSTVTDDARLYTPK   | 94 | 3734   | 1.02 | 0.12 | 11 |
| 22 Y45F10D.12 | GIDINHK              | 15 | 22737  | 1.03 | 0.07 | 7  |
| 1 Y45F10D.12  | TVVTLSTVTDDARLYTPK   | 17 | 2340   | 1.03 | 0.20 | 20 |
| 7 Y45F10D.12  | SENPYLRLLSK          | 14 | 2203   | 1.05 | 0.14 | 13 |
| 1 Y45F10D.12  | SENPYLRLLSK          | 14 | 2459   | 1.07 | 0.17 | 16 |
| 1 Y45F10D.12  | SENPYLRLLSK          | 22 | 2298   | 1.14 | 0.12 | 10 |
| 22 Y45F10D.12 | GIDINHK              | 15 | 23334  | 1.15 | 0.10 | 8  |
| 7 Y45F10D.12  | TVVTLSTVTDDARLYTPK   | 11 | 5049   | 1.18 | 0.15 | 12 |
| 22 Y45F10D.12 | TVVTLSTVTDDARLYTPK   | 45 | 93067  | 1.21 | 0.11 | 9  |
| 7 Y45F10D.12  | TVVTLSTVTDDARLYTPK   | 59 | 5119   | 1.22 | 0.20 | 17 |
| 1 Y45F10D.12  | GENTVFLQGPRSAAREAK   | 12 | 131775 | 1.22 | 0.25 | 20 |
| 7 Y45F10D.12  | GIDINHK              | 16 | 4350   | 1.24 | 0.15 | 12 |
| 7 Y45F10D.12  | TVVTLSTVTDDARLYTPK   | 40 | 17767  | 1.30 | 0.15 | 12 |
| 10 Y45F10D.12 | TVVTLSTVTDDARLYTPK   | 25 | 2961   | 1.32 | 0.16 | 12 |
| 10 Y45F10D.12 | TVVTLSTVTDDARLYTPK   | 57 | 5119   | 1.33 | 0.21 | 16 |
| 22 Y45F10D.12 | TVVTLSTVTDDARLYTPK   | 38 | 50007  | 1.37 | 0.16 | 12 |
| 7 Y45F10D.12  | GIDINHK              | 23 | 3457   | 1.37 | 0.22 | 16 |
| 22 Y45F10D.12 | SENPYLRLLSK          | 30 | 18781  | 1.40 | 0.12 | 9  |
| 7 Y45F10D.12  | TVVTLSTVTDDARLYTPK   | 72 | 4626   | 1.47 | 0.10 | 7  |
| 1 Y45F10D.12  | GENTVFLQGPRSAAREAK   | 16 | 8116   | 1.54 | 0.23 | 15 |
| 22 Y45F10D.12 | SENPYLRLLSK          | 36 | 14758  | 1.57 | 0.15 | 10 |
| 10 Y45F10D.12 | GIDINHK              | 22 | 24778  | 1.58 | 0.21 | 13 |
| 10 Y45F10D.12 | GENTVFLQGPRSAAREAK   | 15 | 24603  | 1.63 | 0.16 | 10 |
| 1 Y45F10D.12  | SENPYLRLLSK          | 24 | 4723   | 1.64 | 0.22 | 14 |
| 10 Y45F10D.12 | GIDINHK              | 24 | 19070  | 1.67 | 0.04 | 2  |

|                                    |                      |    |        |      |      |    |
|------------------------------------|----------------------|----|--------|------|------|----|
| 22 Y45F10D.12                      | TVVTLSTVTTDDARLYTVPK | 66 | 8233   | 1.73 | 0.07 | 4  |
| 22 Y45F10D.12                      | TVVTLSTVTTDDARLYTVPK | 36 | 2644   | 1.84 | 0.11 | 6  |
| 7 Y45F10D.12                       | FNAIVLK              | 50 | 3089   | 1.89 | 0.14 | 8  |
| 10 Y45F10D.12                      | GIDINHK              | 18 | 5202   | 1.89 | 0.24 | 13 |
| 1 Y45F10D.12                       | GENTVFLQGPRSAAREAEK  | 20 | 103243 | 2.05 | 0.16 | 8  |
| 7 Y45F10D.12                       | GENTVFLQGPRSAAREAEK  | 11 | 4779   | 2.15 | 0.17 | 8  |
| 7 Y45F10D.12                       | FNAIVLK              | 62 | 3513   | 2.51 | 0.08 | 3  |
| 10 Y45F10D.12                      | GENTVFLQGPRSAAREAEK  | 14 | 13338  | 2.86 | 0.36 | 12 |
| 1 Y45F10D.12                       | FNAIVLK              | 46 | 1463   | 3.20 | 0.13 | 4  |
| 10 Y45F10D.12                      | FNAIVLK              | 16 | 738    | 3.70 | 0.11 | 3  |
| 1 Y45F10D.12                       | FNAIVLK              | 64 | 2138   | 4.38 | 0.11 | 3  |
| 10 Y45F3A.3a;Y45F3A.3b             | ENILLAFGK            | 24 | 1233   | 0.50 | 0.26 | 53 |
| 10 Y45F3A.3a;Y45F3A.3b             | TLTSLNLYGK           | 30 | 2423   | 0.68 | 0.11 | 16 |
| 10 Y45F3A.3a;Y45F3A.3b             | RVEQLLGNTK           | 39 | 2405   | 0.85 | 0.24 | 28 |
| 1 Y45F3A.3a;Y45F3A.3b              | TLTSLNLYGK           | 18 | 728    | 0.88 | 0.17 | 20 |
| 10 Y45F3A.3a;Y45F3A.3b             | RVEQLLGNTK           | 25 | 2375   | 0.97 | 0.08 | 9  |
| 1 Y45F3A.3a;Y45F3A.3b              | TLTSLNLYGK           | 31 | 947    | 1.18 | 0.24 | 20 |
| 22 Y45F3A.3a;Y45F3A.3b             | RVEQLLGNTK           | 10 | 1504   | 1.19 | 0.17 | 14 |
| 1 Y45F3A.3a;Y45F3A.3b              | TLTSLNLYGK           | 32 | 856    | 1.20 | 0.14 | 12 |
| 22 Y45F3A.3a;Y45F3A.3b             | TLTSLNLYGK           | 12 | 818    | 1.26 | 0.10 | 8  |
| 22 Y45F3A.3a;Y45F3A.3b             | RVEQLLGNTK           | 42 | 1746   | 1.32 | 0.12 | 9  |
| 22 Y45G12B.1a;Y45G12B.1b           | AAVAGGLNDVESLVALK    | 81 | 743    | 0.41 | 0.22 | 54 |
| 22 Y45G12B.1a;Y45G12B.1b           | IIRAVSEVSGK          | 20 | 1484   | 0.55 | 0.12 | 21 |
| 22 Y45G12B.1a;Y45G12B.1b           | IIRAVSEVSGK          | 28 | 1834   | 0.62 | 0.33 | 52 |
| 22 Y45G12B.1a;Y45G12B.1b           | FLYLLGADEGK          | 20 | 1082   | 0.66 | 0.13 | 20 |
| 1 Y45G12B.1a;Y45G12B.1c;Y45G12B.1b | IIRAVSEVSGK          | 31 | 474    | 0.41 | 0.21 | 51 |
| 1 Y45G12B.1a;Y45G12B.1c;Y45G12B.1b | IIRAVSEVSGK          | 14 | 382    | 0.63 | 0.21 | 34 |
| 22 Y45G12C.2                       | LEELFK               | 16 | 1318   | 0.42 | 0.27 | 65 |
| 1 Y45G12C.2                        | AHSGDFIIGNK          | 28 | 2391   | 0.43 | 0.16 | 37 |
| 22 Y45G12C.2                       | LEELFK               | 21 | 2135   | 0.56 | 0.16 | 29 |
| 1 Y45G12C.2                        | AHSGDFIIGNK          | 45 | 4317   | 0.56 | 0.10 | 18 |
| 22 Y45G12C.2                       | AHSGDFIIGNK          | 48 | 6686   | 1.04 | 0.05 | 5  |
| 1 Y45G12C.2                        | GMLLGQLPCLK          | 10 | 812    | 1.14 | 0.08 | 7  |
| 7 Y45G12C.2                        | RPNLNAYLEK           | 17 | 4262   | 1.47 | 0.14 | 9  |
| 10 Y45G12C.2                       | RPNLNAYLEK           | 29 | 12390  | 1.64 | 0.09 | 5  |
| 10 Y45G12C.2                       | RPNLNAYLEK           | 21 | 12418  | 1.72 | 0.17 | 10 |
| 22 Y45G12C.2                       | RPNLNAYLEK           | 42 | 3307   | 1.77 | 0.11 | 6  |
| 7 Y45G12C.2                        | RPNLNAYLEK           | 34 | 2833   | 1.89 | 0.06 | 3  |
| 22 Y46G5A.19a;Y46G5A.19b           | ALNLRFYNSEVHK        | 25 | 2701   | 0.61 | 0.28 | 47 |
| 22 Y46G5A.19a;Y46G5A.19b           | ALNLRFYNSEVHK        | 18 | 1956   | 0.76 | 0.09 | 12 |
| 22 Y46G5A.19a;Y46G5A.19b           | AAFVLPQFVK           | 23 | 1520   | 0.96 | 0.11 | 12 |
| 22 Y46G5A.19a;Y46G5A.19b           | NANRDVTTPARTLTAEQIK  | 17 | 2699   | 0.98 | 0.20 | 21 |
| 22 Y46G5A.19a;Y46G5A.19b           | AAFVLPQFVK           | 31 | 1955   | 1.15 | 0.24 | 21 |
| 22 Y46G5A.19a;Y46G5A.19b           | ALNLRFYNSEVHK        | 29 | 4286   | 1.22 | 0.16 | 13 |
| 22 Y46G5A.19a;Y46G5A.19b           | ALNLRFYNSEVHK        | 23 | 4219   | 1.28 | 0.13 | 10 |
| 10 Y46G5A.19b;Y46G5A.19a           | AAFVLPQFVK           | 13 | 1090   | 0.53 | 0.06 | 11 |
| 10 Y46G5A.19b;Y46G5A.19a           | GWFTFEFSPDDLEK       | 37 | 1183   | 1.06 | 0.12 | 12 |
| 10 Y46G5A.19b;Y46G5A.19a           | GWFTFEFSPDDLEK       | 11 | 726    | 1.29 | 0.09 | 7  |
| 10 Y46G5A.19b;Y46G5A.19a           | RVLIIGGGDGGILREVLK   | 24 | 4040   | 1.51 | 0.16 | 10 |
| 10 Y46G5A.19b;Y46G5A.19a           | RVLIIGGGDGGILREVLK   | 26 | 4001   | 1.56 | 0.18 | 12 |
| 10 Y46G5A.19b;Y46G5A.19a           | AAFVLPQFVK           | 18 | 1458   | 1.64 | 0.11 | 7  |
| 10 Y46G5A.19b;Y46G5A.19a           | AAFVLPQFVK           | 13 | 1200   | 1.64 | 0.14 | 8  |
| 1 Y46G5A.19b;Y46G5A.19a            | AAFVLPQFVK           | 26 | 654    | 2.19 | 0.17 | 8  |
| 1 Y46G5A.19b;Y46G5A.19a            | AAFVLPQFVK           | 22 | 1244   | 2.24 | 0.17 | 8  |
| 1 Y46G5A.31                        | VILFDLGSGAVK         | 67 | 589    | 0.41 | 0.12 | 30 |
| 22 Y46G5A.31                       | VILFDLGSGAVK         | 50 | 1015   | 0.41 | 0.28 | 67 |
| 1 Y46G5A.31                        | VILFDLGSGAVK         | 47 | 535    | 0.49 | 0.17 | 34 |
| 10 Y46G5A.31                       | VILFDLGSGAVK         | 64 | 1276   | 0.76 | 0.12 | 16 |
| 10 Y46G5A.31                       | VILFDLGSGAVK         | 52 | 1183   | 0.83 | 0.19 | 23 |
| 22 Y46G5A.31                       | FAALHEFQNLHAQNK      | 18 | 6797   | 0.86 | 0.12 | 14 |
| 22 Y46G5A.31                       | FAALHEFQNLHAQNK      | 19 | 1786   | 0.88 | 0.14 | 16 |
| 10 Y46G5A.31                       | VILFDLGSGAVK         | 61 | 1250   | 0.99 | 0.13 | 13 |
| 22 Y46G5A.31                       | FAALHEFQNLHAQNK      | 18 | 3948   | 1.11 | 0.15 | 14 |
| 22 Y46G5A.31                       | VILFDLGSGAVK         | 51 | 1227   | 1.21 | 0.11 | 9  |
| 22 Y46G5A.31                       | VILFDLGSGAVK         | 67 | 1124   | 1.30 | 0.12 | 9  |
| 10 Y46G5A.31                       | VILFDLGSGAVK         | 76 | 1903   | 1.35 | 0.11 | 8  |
| 10 Y46G5A.31                       | VILFDLGSGAVK         | 75 | 1690   | 1.37 | 0.15 | 11 |
| 22 Y46G5A.31                       | VILFDLGSGAVK         | 60 | 1199   | 1.58 | 0.17 | 11 |
| 1 Y46G5A.31                        | VILFDLGSGAVK         | 37 | 469    | 1.65 | 0.18 | 11 |
| 22 Y46G5A.31                       | FAALHEFQNLHAQNK      | 16 | 3307   | 1.69 | 0.13 | 8  |
| 22 Y46G5A.31                       | FAALHEFQNLHAQNK      | 15 | 2751   | 2.07 | 0.11 | 5  |
| 22 Y46G5A.31                       | VILFDLGSGAVK         | 57 | 901    | 2.66 | 0.15 | 6  |
| 10 Y46G5A.31                       | VILFDLGSGAVK         | 69 | 1577   | 4.25 | 0.23 | 5  |
| 10 Y46G5A.31                       | VILFDLGSGAVK         | 55 | 1384   | 5.06 | 0.18 | 3  |
| 10 Y46H3A.2                        | IEGIQETK             | 23 | 1232   | 4.75 | 0.39 | 8  |
| 1 Y47D3A.25                        | LLIIGDSGVGK          | 50 | 1326   | 0.34 | 0.08 | 24 |
| 1 Y47D3A.25                        | LLIIGDSGVGK          | 37 | 693    | 0.36 | 0.13 | 35 |
| 1 Y47D3A.25                        | LLIIGDSGVGK          | 56 | 1509   | 0.51 | 0.20 | 38 |
| 10 Y47D3A.25                       | LLIIGDSGVGK          | 51 | 1432   | 0.77 | 0.21 | 28 |
| 10 Y47D3A.25                       | LLIIGDSGVGK          | 38 | 1147   | 0.79 | 0.20 | 25 |
| 10 Y47D3A.25                       | LLIIGDSGVGK          | 54 | 3277   | 0.91 | 0.15 | 16 |
| 10 Y47D3A.25                       | LLIIGDSGVGK          | 42 | 1153   | 0.91 | 0.26 | 28 |
| 1 Y47D3A.25                        | LLIIGDSGVGK          | 38 | 423    | 1.02 | 0.46 | 45 |
| 10 Y47D3A.25                       | LLIIGDSGVGK          | 46 | 2549   | 1.09 | 0.13 | 12 |
| 7 Y47D3A.25                        | LLIIGDSGVGK          | 39 | 2636   | 1.33 | 0.09 | 7  |
| 1 Y47D3A.25                        | LLIIGDSGVGK          | 49 | 746    | 1.65 | 0.31 | 19 |
| 10 Y47D3A.25                       | LLIIGDSGVGK          | 16 | 807    | 1.86 | 0.33 | 18 |
| 10 Y47D3A.25                       | LLIIGDSGVGK          | 35 | 929    | 1.90 | 0.32 | 17 |
| 1 Y47D3A.25                        | LLIIGDSGVGK          | 48 | 462    | 1.99 | 0.03 | 2  |
| 10 Y47D3B.10                       | LVTATYRISK           | 25 | 6355   | 0.43 | 0.12 | 28 |
| 10 Y47D3B.10                       | DITNPINAFLLIK        | 19 | 723    | 0.45 | 0.21 | 47 |
| 10 Y47D3B.10                       | LVTATYRISK           | 25 | 5312   | 0.45 | 0.24 | 53 |
| 10 Y47D3B.10                       | LVTATYRISK           | 11 | 5072   | 0.45 | 0.09 | 21 |
| 7 Y47D3B.10                        | RFNPLAVLFK           | 47 | 1751   | 0.49 | 0.13 | 27 |
| 7 Y47D3B.10                        | DITNPINAFLLIK        | 61 | 818    | 0.51 | 0.12 | 24 |
| 7 Y47D3B.10                        | DITNPINAFLLIK        | 55 | 847    | 0.56 | 0.20 | 36 |
| 10 Y47D3B.10                       | RFNPLAVLFK           | 43 | 2107   | 0.57 | 0.11 | 19 |
| 10 Y47D3B.10                       | DITNPINAFLLIK        | 36 | 1305   | 0.60 | 0.13 | 22 |
| 10 Y47D3B.10                       | RFNPLAVLFK           | 18 | 748    | 0.61 | 0.21 | 35 |
| 10 Y47D3B.10                       | RFNPLAVLFK           | 47 | 1934   | 0.62 | 0.22 | 35 |
| 7 Y47D3B.10                        | RFNPLAVLFK           | 29 | 1331   | 0.62 | 0.31 | 50 |

|                          |                           |    |        |       |      |    |
|--------------------------|---------------------------|----|--------|-------|------|----|
| 7 Y47D3B.10              | RDRPFLVYAPIK              | 11 | 5509   | 0.67  | 0.29 | 44 |
| 22 Y47D3B.10             | NDALFWYNLYK               | 54 | 1387   | 0.70  | 0.11 | 16 |
| 22 Y47D3B.10             | LVTATYRISK                | 13 | 4699   | 0.78  | 0.17 | 22 |
| 22 Y47D3B.10             | NDALFWYNLYK               | 45 | 1330   | 0.79  | 0.21 | 26 |
| 7 Y47D3B.10              | LVTATYRISK                | 23 | 2223   | 0.97  | 0.04 | 4  |
| 22 Y47D3B.10             | RFNPLAVLFK                | 51 | 2042   | 0.97  | 0.15 | 15 |
| 22 Y47D3B.10             | RFNPLAVLFK                | 28 | 804    | 0.98  | 0.12 | 13 |
| 22 Y47D3B.10             | DITNPINAFLLIK             | 50 | 1550   | 1.01  | 0.19 | 19 |
| 22 Y47D3B.10             | LVTATYRISK                | 12 | 4093   | 1.03  | 0.04 | 4  |
| 22 Y47D3B.10             | RFNPLAVLFK                | 36 | 1638   | 1.14  | 0.11 | 9  |
| 7 Y47D3B.10              | RDRPFLVYAPIK              | 10 | 4886   | 1.22  | 0.26 | 22 |
| 22 Y47D3B.10             | DITNPINAFLLIK             | 66 | 1843   | 1.27  | 0.16 | 13 |
| 22 Y47D3B.10             | RFNPLAVLFK                | 12 | 1165   | 1.46  | 0.24 | 16 |
| 1 Y47D3B.10              | DITNPINAFLLIK             | 16 | 374    | 1.49  | 0.10 | 6  |
| 1 Y47D3B.10              | LARATVHDSVTGK             | 25 | 7536   | 2.45  | 0.07 | 3  |
| 22 Y47D3B.10             | LARATVHDSVTGK             | 16 | 25416  | 2.55  | 0.18 | 7  |
| 1 Y47D3B.10              | LARATVHDSVTGK             | 24 | 7030   | 3.46  | 0.10 | 3  |
| 7 Y47G6A.21              | SSFTTGQLLK                | 17 | 1703   | 1.07  | 0.03 | 2  |
| 10 Y47G6A.21             | SSFTTGQLLK                | 18 | 2650   | 1.26  | 0.14 | 11 |
| 7 Y47G6A.21              | SSFTTGQLLK                | 19 | 2236   | 1.30  | 0.22 | 17 |
| 22 Y47G6A.21             | SSFTTGQLLK                | 44 | 3422   | 1.38  | 0.08 | 6  |
| 22 Y47G6A.21             | PVAIITGASSGIGK            | 63 | 2092   | 1.54  | 0.11 | 7  |
| 10 Y47G6A.21             | SSFTTGQLLK                | 17 | 2649   | 1.71  | 0.13 | 7  |
| 1 Y47G6A.21              | PVAIITGASSGIGK            | 63 | 496    | 1.72  | 0.26 | 15 |
| 1 Y47G6A.21              | PVAIITGASSGIGK            | 54 | 519    | 1.76  | 0.21 | 12 |
| 7 Y47G6A.21              | GTALLFAK                  | 20 | 872    | 1.82  | 0.15 | 8  |
| 22 Y47G6A.21             | PVAIITGASSGIGK            | 41 | 1745   | 2.02  | 0.10 | 5  |
| 10 Y47G6A.21             | PVAIITGASSGIGK            | 58 | 3895   | 2.15  | 0.09 | 4  |
| 7 Y47G6A.21              | PVAIITGASSGIGK            | 59 | 1084   | 2.26  | 0.19 | 8  |
| 22 Y47G6A.21             | PVAIITGASSGIGK            | 62 | 1814   | 2.55  | 0.19 | 7  |
| 10 Y47G6A.21             | PVAIITGASSGIGK            | 41 | 3898   | 2.63  | 0.09 | 3  |
| 10 Y47G6A.21             | PVAIITGASSGIGK            | 67 | 3901   | 2.80  | 0.06 | 2  |
| 10 Y47G6A.21             | PVAIITGASSGIGK            | 41 | 1532   | 2.90  | 0.21 | 7  |
| 7 Y47G6A.21              | PVAIITGASSGIGK            | 74 | 1436   | 2.99  | 0.17 | 6  |
| 7 Y47G6A.21              | PVAIITGASSGIGK            | 68 | 1454   | 3.00  | 0.10 | 3  |
| 10 Y47G6A.21             | PVAIITGASSGIGK            | 66 | 1793   | 3.11  | 0.20 | 6  |
| 10 Y47G6A.21             | PVAIITGASSGIGK            | 76 | 4328   | 3.13  | 0.10 | 3  |
| 7 Y47G6A.21              | PVAIITGASSGIGK            | 82 | 1764   | 3.13  | 0.17 | 5  |
| 7 Y47G6A.21              | PVAIITGASSGIGK            | 73 | 1270   | 3.50  | 0.22 | 6  |
| 7 Y47G6A.21              | PVAIITGASSGIGK            | 71 | 1818   | 3.51  | 0.13 | 4  |
| 7 Y47G6A.21              | GTALLFAK                  | 15 | 876    | 3.54  | 0.09 | 3  |
| 7 Y47G6A.21              | PVAIITGASSGIGK            | 85 | 1904   | 4.98  | 0.16 | 3  |
| 22 Y47G6A.21             | SSFTTGQLLK                | 14 | 969    | 14.41 | 0.35 | 2  |
| 10 Y47G6A.22             | NDVLVTAVELASEEAPK         | 76 | 905    | 0.91  | 0.22 | 24 |
| 22 Y47G6A.22             | TTHALGRPGDANEVAEAIYFLASEK | 68 | 2565   | 1.12  | 0.18 | 17 |
| 22 Y47G6A.22             | NDVLVTAVELASEEAPK         | 49 | 787    | 1.30  | 0.18 | 14 |
| 22 Y47G6A.22             | TIVDATVQK                 | 27 | 3015   | 1.35  | 0.07 | 5  |
| 22 Y47G6A.22             | TIVDATVQK                 | 17 | 3002   | 1.42  | 0.12 | 8  |
| 22 Y47G6A.22             | TIVDATVQK                 | 32 | 2439   | 1.47  | 0.13 | 9  |
| 22 Y47G6A.22             | NDVLVTAVELASEEAPK         | 52 | 722    | 1.51  | 0.23 | 15 |
| 10 Y47G6A.6              | DSISTEDVILK               | 11 | 1181   | 1.54  | 0.23 | 15 |
| 22 Y48B6A.12;F33D11.8    | RVRGPEYDTLVDNFMK          | 15 | 2857   | 0.53  | 0.07 | 13 |
| 7 Y48B6A.12;F33D11.8     | RGIDLLK                   | 24 | 3682   | 0.66  | 0.08 | 12 |
| 22 Y48B6A.12;F33D11.8    | RVRGPEYDTLVDNFMK          | 17 | 2704   | 0.79  | 0.14 | 17 |
| 1 Y48B6A.12;F33D11.8     | LRQQPDNLAK                | 18 | 3239   | 0.86  | 0.12 | 14 |
| 22 Y48B6A.12;F33D11.8    | TLALHK                    | 14 | 2180   | 0.88  | 0.08 | 9  |
| 1 Y48B6A.12;F33D11.8     | NLLEVVK                   | 24 | 548    | 0.92  | 0.25 | 27 |
| 1 Y48B6A.12;F33D11.8     | RGIDLLK                   | 18 | 1026   | 0.95  | 0.09 | 9  |
| 1 Y48B6A.12;F33D11.8     | RGIDLLK                   | 16 | 727    | 0.97  | 0.10 | 10 |
| 10 Y48B6A.12;F33D11.8    | RVRGPEYDTLVDNFMK          | 13 | 3714   | 1.01  | 0.13 | 13 |
| 22 Y48B6A.12;F33D11.8    | YIQLDSLQDRNEK             | 15 | 2629   | 1.09  | 0.13 | 12 |
| 10 Y48B6A.12;F33D11.8    | NLLEVVK                   | 12 | 681    | 1.11  | 0.13 | 12 |
| 1 Y48B6A.12;F33D11.8     | NLLEVVK                   | 17 | 672    | 1.16  | 0.15 | 13 |
| 22 Y48B6A.12;F33D11.8    | LRQQPDNLAK                | 15 | 10184  | 1.38  | 0.13 | 9  |
| 22 Y48B6A.12;F33D11.8    | RVRGPEYDTLVDNFMK          | 10 | 5285   | 1.39  | 0.16 | 11 |
| 1 Y48B6A.12;F33D11.8     | RGIDLLK                   | 12 | 918    | 1.40  | 0.13 | 9  |
| 22 Y48B6A.12;F33D11.8    | LRQQPDNLAK                | 19 | 6081   | 1.41  | 0.14 | 10 |
| 1 Y48B6A.12;F33D11.8     | LRQQPDNLAK                | 23 | 3086   | 1.41  | 0.17 | 12 |
| 22 Y48B6A.12;F33D11.8    | RGIDLLK                   | 32 | 8359   | 1.64  | 0.18 | 11 |
| 10 Y48B6A.12;F33D11.8    | LRQQPDNLAK                | 23 | 10032  | 1.68  | 0.06 | 4  |
| 10 Y48B6A.12;F33D11.8    | LRQQPDNLAK                | 16 | 7374   | 1.96  | 0.11 | 6  |
| 7 Y48B6A.12;F33D11.8     | RGIDLLK                   | 28 | 1021   | 2.01  | 0.29 | 14 |
| 22 Y48E1B.10             | TDEEAALADALIDQFK          | 73 | 3034   | 0.37  | 0.14 | 39 |
| 22 Y48E1B.10             | VDGIPEIRK                 | 29 | 31056  | 0.40  | 0.15 | 38 |
| 22 Y48E1B.10             | VDGIPEIRK                 | 17 | 29241  | 0.51  | 0.09 | 17 |
| 22 Y48E1B.10             | TDEEAALADALIDQFK          | 86 | 2430   | 0.57  | 0.14 | 25 |
| 1 Y48E1B.10              | VDGIPEIRK                 | 25 | 10333  | 0.78  | 0.10 | 13 |
| 10 Y48E1B.10             | VDGIPEIRK                 | 14 | 19251  | 1.28  | 0.10 | 8  |
| 22 Y48G10A.1             | STWNQYDASEVLK             | 27 | 748    | 0.87  | 0.24 | 28 |
| 10 Y48G10A.1             | ELLEEVVPSVAPIDLAK         | 17 | 920    | 0.94  | 0.10 | 11 |
| 22 Y48G8AL.5             | LVDTSLLPELK               | 12 | 1224   | 0.53  | 0.32 | 60 |
| 22 Y48G8AL.5             | DEPFTFLK                  | 24 | 2005   | 0.93  | 0.21 | 23 |
| 22 Y48G8AL.5             | VIVSSLFPPTQEAK            | 11 | 2406   | 0.93  | 0.12 | 13 |
| 22 Y48G8AL.8a;Y48G8AL.8b | SADFLDLLK                 | 18 | 968    | 0.38  | 0.20 | 54 |
| 10 Y48G8AL.8a;Y48G8AL.8b | GLDVDHLVIEHINVQRAAK       | 23 | 37603  | 0.56  | 0.25 | 45 |
| 7 Y48G8AL.8a;Y48G8AL.8b  | EDVVSKPTDDAAPK            | 45 | 7065   | 0.63  | 0.35 | 55 |
| 22 Y48G8AL.8a;Y48G8AL.8b | SADFLDLLK                 | 81 | 153906 | 0.67  | 0.05 | 7  |
| 10 Y48G8AL.8a;Y48G8AL.8b | GLDVDHLVIEHINVQRAAK       | 24 | 106137 | 0.70  | 0.49 | 70 |
| 10 Y48G8AL.8a;Y48G8AL.8b | QWNTTQGRWPVK              | 35 | 8869   | 0.90  | 0.28 | 31 |
| 7 Y48G8AL.8a;Y48G8AL.8b  | EDVVSKPTDDAAPK            | 65 | 9585   | 0.92  | 0.05 | 5  |
| 1 Y48G8AL.8a;Y48G8AL.8b  | GLDVDHLVIEHINVQRAAK       | 18 | 4605   | 0.92  | 0.08 | 9  |
| 22 Y48G8AL.8a;Y48G8AL.8b | GLDVDHLVIEHINVQRAAK       | 21 | 156746 | 0.94  | 0.18 | 19 |
| 22 Y48G8AL.8a;Y48G8AL.8b | SADFLDLLK                 | 50 | 1101   | 0.97  | 0.22 | 22 |
| 7 Y48G8AL.8a;Y48G8AL.8b  | GLDVDHLVIEHINVQRAAK       | 16 | 3583   | 0.98  | 0.17 | 18 |
| 1 Y48G8AL.8a;Y48G8AL.8b  | QWNTTQGRWPVK              | 22 | 1703   | 1.00  | 0.38 | 38 |
| 22 Y48G8AL.8a;Y48G8AL.8b | EDVVSKPTDDAAPK            | 59 | 17125  | 1.03  | 0.34 | 34 |
| 10 Y48G8AL.8a;Y48G8AL.8b | ARGSDLRVHFK               | 16 | 96790  | 1.05  | 0.09 | 9  |
| 7 Y48G8AL.8a;Y48G8AL.8b  | QWNTTQGRWPVK              | 15 | 1967   | 1.06  | 0.09 | 8  |
| 7 Y48G8AL.8a;Y48G8AL.8b  | QWNTTQGRWPVK              | 17 | 2549   | 1.06  | 0.14 | 13 |
| 10 Y48G8AL.8a;Y48G8AL.8b | EDVVSKPTDDAAPK            | 68 | 27011  | 1.07  | 0.19 | 17 |
| 7 Y48G8AL.8a;Y48G8AL.8b  | ARGSDLRVHFK               | 12 | 3587   | 1.08  | 0.34 | 31 |

|                          |       |                    |    |       |      |      |    |
|--------------------------|-------|--------------------|----|-------|------|------|----|
| 10 Y48G8AL.8a;Y48G8AL.8b | EDVVS | KPTDDAAPK          | 53 | 19980 | 1.08 | 0.08 | 7  |
| 22 Y48G8AL.8a;Y48G8AL.8b | GLD   | VDHLVIEHINVQRAAK   | 10 | 52806 | 1.12 | 0.19 | 17 |
| 10 Y48G8AL.8a;Y48G8AL.8b | VHYS  | RAPENSTK           | 15 | 22754 | 1.14 | 0.15 | 13 |
| 10 Y48G8AL.8a;Y48G8AL.8b | GLD   | VDHLVIEHINVQRAAK   | 13 | 13128 | 1.21 | 0.13 | 11 |
| 22 Y48G8AL.8a;Y48G8AL.8b | GLD   | VDHLVIEHINVQRAAK   | 15 | 12986 | 1.23 | 0.17 | 13 |
| 1 Y48G8AL.8a;Y48G8AL.8b  | SAD   | FLLDLLK            | 58 | 1684  | 1.26 | 0.10 | 8  |
| 7 Y48G8AL.8a;Y48G8AL.8b  | VHYS  | RAPENSTK           | 25 | 27549 | 1.28 | 0.18 | 14 |
| 1 Y48G8AL.8a;Y48G8AL.8b  | SAD   | FLLDLLK            | 63 | 1361  | 1.28 | 0.14 | 11 |
| 10 Y48G8AL.8a;Y48G8AL.8b | QWNT  | TQGRWVPVK          | 37 | 11782 | 1.30 | 0.25 | 19 |
| 7 Y48G8AL.8a;Y48G8AL.8b  | QWNT  | TQGRWVPVK          | 12 | 2512  | 1.42 | 0.12 | 9  |
| 10 Y48G8AL.8a;Y48G8AL.8b | GLD   | VDHLVIEHINVQRAAK   | 29 | 15051 | 1.42 | 0.16 | 11 |
| 10 Y48G8AL.8a;Y48G8AL.8b | GLD   | VDHLVIEHINVQRAAK   | 19 | 9150  | 1.43 | 0.17 | 12 |
| 22 Y48G8AL.8a;Y48G8AL.8b | QWNT  | TQGRWVPVK          | 35 | 7188  | 1.47 | 0.07 | 5  |
| 22 Y48G8AL.8a;Y48G8AL.8b | QWNT  | TQGRWVPVK          | 15 | 32766 | 1.49 | 0.11 | 7  |
| 22 Y48G8AL.8a;Y48G8AL.8b | QWNT  | TQGRWVPVK          | 50 | 10291 | 1.51 | 0.05 | 4  |
| 22 Y48G8AL.8a;Y48G8AL.8b | QWNT  | TQGRWVPVK          | 12 | 26343 | 1.55 | 0.10 | 7  |
| 22 Y48G8AL.8a;Y48G8AL.8b | GLD   | VDHLVIEHINVQRAAK   | 15 | 8987  | 1.56 | 0.15 | 10 |
| 1 Y48G8AL.8a;Y48G8AL.8b  | VHYS  | RAPENSTK           | 23 | 3102  | 1.56 | 0.14 | 9  |
| 10 Y48G8AL.8a;Y48G8AL.8b | QWNT  | TQGRWVPVK          | 36 | 1712  | 1.61 | 0.17 | 11 |
| 7 Y48G8AL.8a;Y48G8AL.8b  | SAD   | FLLDLLK            | 46 | 1320  | 1.78 | 0.08 | 5  |
| 1 Y48G8AL.8a;Y48G8AL.8b  | VHYS  | RAPENSTK           | 26 | 2791  | 1.79 | 0.22 | 12 |
| 10 Y48G8AL.8a;Y48G8AL.8b | VHYS  | RAPENSTK           | 16 | 2586  | 1.80 | 0.18 | 10 |
| 10 Y48G8AL.8a;Y48G8AL.8b | QWNT  | TQGRWVPVK          | 24 | 3956  | 1.81 | 0.21 | 11 |
| 1 Y48G8AL.8a;Y48G8AL.8b  | QWNT  | TQGRWVPVK          | 11 | 1369  | 1.85 | 0.31 | 17 |
| 1 Y48G8AL.8a;Y48G8AL.8b  | QWNT  | TQGRWVPVK          | 15 | 1530  | 1.89 | 0.34 | 18 |
| 10 Y48G8AL.8a;Y48G8AL.8b | VHYS  | RAPENSTK           | 34 | 3508  | 1.89 | 0.09 | 5  |
| 10 Y48G8AL.8a;Y48G8AL.8b | QWNT  | TQGRWVPVK          | 15 | 2159  | 2.06 | 0.08 | 4  |
| 22 Y48G8AL.8a;Y48G8AL.8b | ARG   | SDLRVHFK           | 12 | 14294 | 2.08 | 0.10 | 5  |
| 22 Y48G8AL.8a;Y48G8AL.8b | VHYS  | RAPENSTK           | 45 | 4336  | 2.13 | 0.11 | 5  |
| 7 Y48G8AL.8a;Y48G8AL.8b  | VHYS  | RAPENSTK           | 18 | 1224  | 2.15 | 0.19 | 9  |
| 22 Y48G8AL.8a;Y48G8AL.8b | VHYS  | RAPENSTK           | 39 | 5797  | 2.24 | 0.08 | 4  |
| 22 Y48G8AL.8a;Y48G8AL.8b | QWNT  | TQGRWVPVK          | 16 | 5783  | 2.32 | 0.11 | 5  |
| 22 Y48G8AL.8a;Y48G8AL.8b | QWNT  | TQGRWVPVK          | 19 | 3491  | 2.44 | 0.12 | 5  |
| 1 Y48G8AL.8a;Y48G8AL.8b  | QWNT  | TQGRWVPVK          | 13 | 4232  | 2.57 | 0.33 | 13 |
| 7 Y48G8AL.8a;Y48G8AL.8b  | VHYS  | RAPENSTK           | 43 | 969   | 2.69 | 0.22 | 8  |
| 1 Y48G8AL.8a;Y48G8AL.8b  | QWNT  | TQGRWVPVK          | 14 | 1426  | 3.09 | 0.29 | 9  |
| 7 Y49A3A.2               | DSM   | GDLIYQLSAMK        | 54 | 1822  | 0.34 | 0.07 | 21 |
| 22 Y49A3A.2              | NMIG  | FYDLARHAVEATAQSDNK | 44 | 4188  | 0.36 | 0.30 | 84 |
| 7 Y49A3A.2               | DSM   | GDLIYQLSAMK        | 66 | 2313  | 0.44 | 0.16 | 37 |
| 10 Y49A3A.2              | DSM   | GDLIYQLSAMK        | 55 | 1896  | 0.44 | 0.08 | 18 |
| 22 Y49A3A.2              | GVST  | NALSREARWDFVVS     | 16 | 9564  | 0.44 | 0.37 | 85 |
| 10 Y49A3A.2              | DSM   | GDLIYQLSAMK        | 58 | 2690  | 0.46 | 0.09 | 19 |
| 7 Y49A3A.2               | DSM   | GDLIYQLSAMK        | 63 | 1836  | 0.47 | 0.08 | 17 |
| 22 Y49A3A.2              | TVIS  | QSLSK              | 14 | 3030  | 0.48 | 0.20 | 42 |
| 10 Y49A3A.2              | NYPE  | FVSLRTK            | 41 | 12409 | 0.50 | 0.10 | 21 |
| 7 Y49A3A.2               | DSM   | GDLIYQLSAMK        | 82 | 2620  | 0.51 | 0.17 | 34 |
| 10 Y49A3A.2              | DSM   | GDLIYQLSAMK        | 48 | 1145  | 0.51 | 0.19 | 37 |
| 10 Y49A3A.2              | DSM   | GDLIYQLSAMK        | 65 | 2899  | 0.51 | 0.17 | 32 |
| 1 Y49A3A.2               | DSM   | GDLIYQLSAMK        | 19 | 476   | 0.52 | 0.14 | 26 |
| 10 Y49A3A.2              | DSM   | GDLIYQLSAMK        | 42 | 1468  | 0.52 | 0.07 | 14 |
| 10 Y49A3A.2              | DSM   | GDLIYQLSAMK        | 48 | 1495  | 0.52 | 0.22 | 43 |
| 10 Y49A3A.2              | YDR   | FCPFYK             | 13 | 8624  | 0.52 | 0.42 | 82 |
| 22 Y49A3A.2              | TVIS  | QSLSK              | 32 | 7109  | 0.53 | 0.19 | 36 |
| 10 Y49A3A.2              | DSM   | GDLIYQLSAMK        | 52 | 1119  | 0.53 | 0.09 | 17 |
| 7 Y49A3A.2               | DSM   | GDLIYQLSAMK        | 57 | 1207  | 0.54 | 0.23 | 43 |
| 22 Y49A3A.2              | DSM   | GDLIYQLSAMK        | 46 | 770   | 0.54 | 0.09 | 17 |
| 10 Y49A3A.2              | NYPE  | FVSLRTK            | 34 | 8625  | 0.56 | 0.13 | 23 |
| 10 Y49A3A.2              | NYPE  | FVSLRTK            | 11 | 1983  | 0.58 | 0.31 | 53 |
| 22 Y49A3A.2              | DSM   | GDLIYQLSAMK        | 41 | 1452  | 0.60 | 0.18 | 30 |
| 1 Y49A3A.2               | VTLE  | VAK                | 26 | 2262  | 0.60 | 0.11 | 18 |
| 1 Y49A3A.2               | DDFL  | QQNGYTK            | 17 | 2043  | 0.60 | 0.17 | 27 |
| 22 Y49A3A.2              | DSM   | GDLIYQLSAMK        | 27 | 1700  | 0.61 | 0.13 | 22 |
| 7 Y49A3A.2               | DSM   | GDLIYQLSAMK        | 57 | 1371  | 0.61 | 0.24 | 40 |
| 7 Y49A3A.2               | DSM   | GDLIYQLSAMK        | 60 | 2035  | 0.61 | 0.08 | 13 |
| 22 Y49A3A.2              | NYPE  | FVSLRTK            | 19 | 5623  | 0.62 | 0.16 | 25 |
| 22 Y49A3A.2              | DIAD  | ITQSIYIPK          | 50 | 5403  | 0.62 | 0.19 | 30 |
| 22 Y49A3A.2              | NYPE  | FVSLRTK            | 16 | 4489  | 0.63 | 0.06 | 9  |
| 22 Y49A3A.2              | DIAD  | ITQSIYIPK          | 59 | 5238  | 0.63 | 0.07 | 11 |
| 7 Y49A3A.2               | DSM   | GDLIYQLSAMK        | 39 | 1397  | 0.63 | 0.19 | 30 |
| 22 Y49A3A.2              | ITWN  | VIK                | 41 | 24759 | 0.63 | 0.09 | 14 |
| 10 Y49A3A.2              | DIAD  | ITQSIYIPK          | 32 | 3384  | 0.64 | 0.14 | 22 |
| 22 Y49A3A.2              | NYPE  | FVSLRTK            | 31 | 9225  | 0.65 | 0.14 | 21 |
| 1 Y49A3A.2               | DSM   | GDLIYQLSAMK        | 44 | 701   | 0.65 | 0.14 | 21 |
| 7 Y49A3A.2               | ITWN  | VIK                | 22 | 9477  | 0.66 | 0.09 | 13 |
| 10 Y49A3A.2              | DIAD  | ITQSIYIPK          | 19 | 1846  | 0.66 | 0.18 | 27 |
| 10 Y49A3A.2              | DSM   | GDLIYQLSAMK        | 50 | 1541  | 0.66 | 0.17 | 26 |
| 7 Y49A3A.2               | DSM   | GDLIYQLSAMK        | 40 | 1042  | 0.68 | 0.20 | 29 |
| 22 Y49A3A.2              | DSM   | GDLIYQLSAMK        | 44 | 2124  | 0.68 | 0.16 | 23 |
| 10 Y49A3A.2              | DSM   | GDLIYQLSAMK        | 63 | 3223  | 0.68 | 0.14 | 21 |
| 22 Y49A3A.2              | DSM   | GDLIYQLSAMK        | 61 | 2873  | 0.69 | 0.17 | 25 |
| 22 Y49A3A.2              | GVST  | NALSREARWDFVVS     | 10 | 3572  | 0.69 | 0.36 | 52 |
| 7 Y49A3A.2               | NYPE  | FVSLRTK            | 38 | 9719  | 0.70 | 0.10 | 14 |
| 7 Y49A3A.2               | NMIG  | FYDLARHAVEATAQSDNK | 30 | 3564  | 0.71 | 0.13 | 18 |
| 22 Y49A3A.2              | DSM   | GDLIYQLSAMK        | 19 | 697   | 0.71 | 0.25 | 35 |
| 7 Y49A3A.2               | NYPE  | FVSLRTK            | 25 | 5486  | 0.72 | 0.12 | 16 |
| 10 Y49A3A.2              | DSM   | GDLIYQLSAMK        | 70 | 2821  | 0.72 | 0.26 | 36 |
| 22 Y49A3A.2              | DSM   | GDLIYQLSAMK        | 60 | 4126  | 0.73 | 0.14 | 20 |
| 22 Y49A3A.2              | DSM   | GDLIYQLSAMK        | 80 | 4173  | 0.73 | 0.16 | 21 |
| 22 Y49A3A.2              | DSM   | GDLIYQLSAMK        | 66 | 2099  | 0.73 | 0.16 | 22 |
| 22 Y49A3A.2              | NYPE  | FVSLRTK            | 29 | 7610  | 0.73 | 0.09 | 12 |
| 7 Y49A3A.2               | DSM   | GDLIYQLSAMK        | 73 | 1814  | 0.74 | 0.17 | 23 |
| 7 Y49A3A.2               | DSM   | GDLIYQLSAMK        | 57 | 2374  | 0.74 | 0.17 | 23 |
| 10 Y49A3A.2              | DSM   | GDLIYQLSAMK        | 65 | 2606  | 0.75 | 0.11 | 14 |
| 10 Y49A3A.2              | YDR   | FCPFYK             | 15 | 12554 | 0.75 | 0.41 | 54 |
| 1 Y49A3A.2               | DDFL  | QQNGYTK            | 43 | 1740  | 0.75 | 0.09 | 13 |
| 7 Y49A3A.2               | DSM   | GDLIYQLSAMK        | 79 | 3847  | 0.76 | 0.17 | 23 |
| 1 Y49A3A.2               | DSM   | GDLIYQLSAMK        | 59 | 2277  | 0.77 | 0.21 | 27 |
| 10 Y49A3A.2              | TVIS  | QSLSK              | 25 | 5269  | 0.78 | 0.09 | 12 |
| 10 Y49A3A.2              | DSM   | GDLIYQLSAMK        | 71 | 1853  | 0.78 | 0.21 | 26 |
| 10 Y49A3A.2              | DSM   | GDLIYQLSAMK        | 71 | 4511  | 0.79 | 0.16 | 20 |
| 22 Y49A3A.2              | DIAD  | ITQSIYIPK          | 25 | 1188  | 0.79 | 0.09 | 11 |

|             |                        |     |       |      |      |    |
|-------------|------------------------|-----|-------|------|------|----|
| 22 Y49A3A.2 | ITWNVIK                | 47  | 24939 | 0.79 | 0.11 | 14 |
| 22 Y49A3A.2 | NYPEFVSLRTK            | 22  | 6441  | 0.79 | 0.04 | 5  |
| 22 Y49A3A.2 | DSMGDLIYQLSAMK         | 91  | 5126  | 0.80 | 0.14 | 18 |
| 22 Y49A3A.2 | DSMGDLIYQLSAMK         | 65  | 2357  | 0.80 | 0.19 | 24 |
| 22 Y49A3A.2 | DSMGDLIYQLSAMK         | 85  | 3836  | 0.80 | 0.15 | 19 |
| 10 Y49A3A.2 | NYPEFVSLRTK            | 23  | 10069 | 0.80 | 0.14 | 17 |
| 1 Y49A3A.2  | NMIGFYDLARHAVEATAQSDNK | 34  | 3510  | 0.80 | 0.16 | 20 |
| 7 Y49A3A.2  | NMIGFYDLARHAVEATAQSDNK | 36  | 2737  | 0.81 | 0.12 | 15 |
| 22 Y49A3A.2 | DSMGDLIYQLSAMK         | 50  | 5050  | 0.81 | 0.15 | 18 |
| 22 Y49A3A.2 | NMIGFYDLARHAVEATAQSDNK | 33  | 2175  | 0.81 | 0.20 | 25 |
| 22 Y49A3A.2 | NMIGFYDLARHAVEATAQSDNK | 51  | 8653  | 0.81 | 0.11 | 14 |
| 1 Y49A3A.2  | NYPEFVSLRTK            | 29  | 8240  | 0.82 | 0.22 | 27 |
| 1 Y49A3A.2  | NMIGFYDLARHAVEATAQSDNK | 32  | 1988  | 0.82 | 0.09 | 11 |
| 1 Y49A3A.2  | DSMGDLIYQLSAMK         | 27  | 534   | 0.83 | 0.08 | 10 |
| 7 Y49A3A.2  | NYPEFVSLRTK            | 37  | 7495  | 0.84 | 0.08 | 10 |
| 22 Y49A3A.2 | DIADITQSIYIPK          | 22  | 1143  | 0.85 | 0.09 | 11 |
| 22 Y49A3A.2 | DSMGDLIYQLSAMK         | 94  | 7329  | 0.85 | 0.16 | 19 |
| 22 Y49A3A.2 | DSMGDLIYQLSAMK         | 75  | 3726  | 0.87 | 0.16 | 18 |
| 10 Y49A3A.2 | NMIGFYDLARHAVEATAQSDNK | 35  | 4296  | 0.87 | 0.15 | 18 |
| 7 Y49A3A.2  | DIADITQSIYIPK          | 41  | 2870  | 0.88 | 0.10 | 12 |
| 1 Y49A3A.2  | DIADITQSIYIPK          | 25  | 1207  | 0.88 | 0.07 | 8  |
| 22 Y49A3A.2 | DIADITQSIYIPK          | 44  | 3424  | 0.88 | 0.24 | 27 |
| 7 Y49A3A.2  | NYPEFVSLRTK            | 33  | 6205  | 0.88 | 0.18 | 21 |
| 10 Y49A3A.2 | DIADITQSIYIPK          | 31  | 1449  | 0.90 | 0.21 | 23 |
| 7 Y49A3A.2  | NYPEFVSLRTK            | 32  | 4666  | 0.90 | 0.17 | 19 |
| 10 Y49A3A.2 | NYPEFVSLRTK            | 17  | 7158  | 0.91 | 0.20 | 22 |
| 22 Y49A3A.2 | TVISQSLSK              | 31  | 3222  | 0.91 | 0.17 | 19 |
| 10 Y49A3A.2 | DIADITQSIYIPK          | 25  | 1648  | 0.91 | 0.22 | 25 |
| 22 Y49A3A.2 | YDRFCPFYK              | 11  | 7468  | 0.91 | 0.25 | 28 |
| 22 Y49A3A.2 | DSMGDLIYQLSAMK         | 57  | 3420  | 0.91 | 0.13 | 14 |
| 22 Y49A3A.2 | NMIGFYDLARHAVEATAQSDNK | 42  | 11915 | 0.92 | 0.10 | 11 |
| 22 Y49A3A.2 | NMIGFYDLARHAVEATAQSDNK | 24  | 6000  | 0.93 | 0.20 | 22 |
| 1 Y49A3A.2  | DIADITQSIYIPK          | 16  | 1086  | 0.93 | 0.11 | 12 |
| 1 Y49A3A.2  | DSMGDLIYQLSAMK         | 76  | 2622  | 0.93 | 0.11 | 12 |
| 22 Y49A3A.2 | NMIGFYDLARHAVEATAQSDNK | 35  | 4557  | 0.94 | 0.18 | 19 |
| 1 Y49A3A.2  | DDFLQQNGYTK            | 42  | 1778  | 0.94 | 0.16 | 16 |
| 22 Y49A3A.2 | DSMGDLIYQLSAMK         | 28  | 975   | 0.95 | 0.13 | 14 |
| 7 Y49A3A.2  | ITWNVIK                | 17  | 18123 | 0.95 | 0.06 | 7  |
| 22 Y49A3A.2 | TVISQSLSK              | 14  | 6004  | 0.95 | 0.16 | 17 |
| 22 Y49A3A.2 | NMIGFYDLARHAVEATAQSDNK | 32  | 8246  | 0.96 | 0.14 | 14 |
| 10 Y49A3A.2 | NYPEFVSLRTK            | 33  | 5446  | 0.96 | 0.35 | 36 |
| 22 Y49A3A.2 | NMIGFYDLARHAVEATAQSDNK | 23  | 1552  | 0.96 | 0.20 | 21 |
| 10 Y49A3A.2 | DSMGDLIYQLSAMK         | 86  | 4713  | 0.98 | 0.18 | 18 |
| 10 Y49A3A.2 | DSMGDLIYQLSAMK         | 89  | 3888  | 0.99 | 0.27 | 27 |
| 1 Y49A3A.2  | DSMGDLIYQLSAMK         | 34  | 620   | 0.99 | 0.08 | 8  |
| 7 Y49A3A.2  | DIADITQSIYIPK          | 27  | 1478  | 1.00 | 0.23 | 23 |
| 10 Y49A3A.2 | TVISQSLSK              | 40  | 4128  | 1.01 | 0.06 | 6  |
| 22 Y49A3A.2 | NYPEFVSLRTK            | 26  | 4704  | 1.01 | 0.08 | 8  |
| 1 Y49A3A.2  | NMIGFYDLARHAVEATAQSDNK | 18  | 2509  | 1.02 | 0.11 | 11 |
| 7 Y49A3A.2  | DSMGDLIYQLSAMK         | 80  | 4616  | 1.02 | 0.13 | 12 |
| 1 Y49A3A.2  | DSMGDLIYQLSAMK         | 75  | 3092  | 1.03 | 0.14 | 14 |
| 7 Y49A3A.2  | DSMGDLIYQLSAMK         | 108 | 3815  | 1.04 | 0.13 | 12 |
| 1 Y49A3A.2  | DSMGDLIYQLSAMK         | 21  | 617   | 1.05 | 0.21 | 20 |
| 22 Y49A3A.2 | TVISQSLSK              | 23  | 3217  | 1.05 | 0.12 | 11 |
| 22 Y49A3A.2 | NYPEFVSLRTK            | 34  | 5431  | 1.05 | 0.05 | 5  |
| 10 Y49A3A.2 | TVISQSLSK              | 48  | 8596  | 1.06 | 0.08 | 8  |
| 1 Y49A3A.2  | DSMGDLIYQLSAMK         | 50  | 1747  | 1.06 | 0.20 | 18 |
| 10 Y49A3A.2 | NYPEFVSLRTK            | 26  | 5830  | 1.08 | 0.11 | 10 |
| 22 Y49A3A.2 | VTLEVAK                | 49  | 3970  | 1.09 | 0.15 | 14 |
| 10 Y49A3A.2 | NYPEFVSLRTK            | 16  | 6985  | 1.11 | 0.04 | 4  |
| 10 Y49A3A.2 | NMIGFYDLARHAVEATAQSDNK | 57  | 10756 | 1.12 | 0.11 | 10 |
| 10 Y49A3A.2 | TVISQSLSK              | 46  | 7187  | 1.12 | 0.08 | 8  |
| 7 Y49A3A.2  | DIADITQSIYIPK          | 28  | 2289  | 1.12 | 0.22 | 19 |
| 7 Y49A3A.2  | DIADITQSIYIPK          | 23  | 1931  | 1.13 | 0.24 | 21 |
| 22 Y49A3A.2 | DIADITQSIYIPK          | 36  | 3016  | 1.14 | 0.16 | 14 |
| 7 Y49A3A.2  | NMIGFYDLARHAVEATAQSDNK | 16  | 1592  | 1.16 | 0.22 | 19 |
| 1 Y49A3A.2  | DSMGDLIYQLSAMK         | 74  | 2899  | 1.18 | 0.22 | 18 |
| 22 Y49A3A.2 | VTLEVAK                | 39  | 3265  | 1.19 | 0.09 | 8  |
| 10 Y49A3A.2 | TVISQSLSK              | 14  | 4080  | 1.21 | 0.07 | 5  |
| 22 Y49A3A.2 | DIADITQSIYIPK          | 37  | 1743  | 1.21 | 0.25 | 21 |
| 1 Y49A3A.2  | TVISQSLSK              | 38  | 2770  | 1.22 | 0.15 | 12 |
| 10 Y49A3A.2 | NMIGFYDLARHAVEATAQSDNK | 55  | 8157  | 1.23 | 0.10 | 8  |
| 10 Y49A3A.2 | NMIGFYDLARHAVEATAQSDNK | 41  | 8017  | 1.25 | 0.24 | 19 |
| 7 Y49A3A.2  | NMIGFYDLARHAVEATAQSDNK | 44  | 7703  | 1.27 | 0.07 | 6  |
| 1 Y49A3A.2  | NYPEFVSLRTK            | 54  | 7291  | 1.27 | 0.14 | 11 |
| 10 Y49A3A.2 | DIADITQSIYIPK          | 40  | 1880  | 1.28 | 0.14 | 11 |
| 1 Y49A3A.2  | NYPEFVSLRTK            | 41  | 6177  | 1.29 | 0.15 | 12 |
| 1 Y49A3A.2  | DSMGDLIYQLSAMK         | 14  | 501   | 1.31 | 0.31 | 24 |
| 10 Y49A3A.2 | NMIGFYDLARHAVEATAQSDNK | 24  | 5594  | 1.33 | 0.14 | 11 |
| 7 Y49A3A.2  | VTLEVAK                | 34  | 10789 | 1.36 | 0.18 | 13 |
| 10 Y49A3A.2 | DIADITQSIYIPK          | 11  | 2406  | 1.36 | 0.18 | 13 |
| 10 Y49A3A.2 | DIADITQSIYIPK          | 29  | 2089  | 1.38 | 0.16 | 12 |
| 1 Y49A3A.2  | TVISQSLSK              | 36  | 2435  | 1.39 | 0.15 | 11 |
| 7 Y49A3A.2  | DDFLQQNGYTK            | 24  | 4833  | 1.42 | 0.12 | 8  |
| 22 Y49A3A.2 | DIADITQSIYIPK          | 26  | 1412  | 1.43 | 0.10 | 7  |
| 22 Y49A3A.2 | DIADITQSIYIPK          | 37  | 3640  | 1.44 | 0.14 | 10 |
| 7 Y49A3A.2  | NMIGFYDLARHAVEATAQSDNK | 31  | 5852  | 1.47 | 0.14 | 10 |
| 1 Y49A3A.2  | DIADITQSIYIPK          | 28  | 1945  | 1.48 | 0.13 | 8  |
| 22 Y49A3A.2 | NYPEFVSLRTK            | 19  | 2231  | 1.48 | 0.10 | 7  |
| 7 Y49A3A.2  | DIADITQSIYIPK          | 20  | 2157  | 1.56 | 0.17 | 11 |
| 1 Y49A3A.2  | ITWNVIK                | 13  | 1112  | 1.65 | 0.21 | 13 |
| 10 Y49A3A.2 | GVSTNALSREARWDFVVS     | 14  | 5387  | 1.69 | 0.23 | 13 |
| 1 Y49A3A.2  | NYPEFVSLRTK            | 41  | 6891  | 1.70 | 0.09 | 5  |
| 1 Y49A3A.2  | DIADITQSIYIPK          | 15  | 1565  | 1.72 | 0.20 | 12 |
| 1 Y49A3A.2  | DIADITQSIYIPK          | 23  | 1452  | 1.74 | 0.06 | 4  |
| 1 Y49A3A.2  | TVGMLK                 | 12  | 639   | 1.78 | 0.16 | 9  |
| 10 Y49A3A.2 | DIADITQSIYIPK          | 12  | 2088  | 1.91 | 0.32 | 17 |
| 10 Y49A3A.2 | DIADITQSIYIPK          | 13  | 2324  | 2.43 | 0.16 | 7  |
| 22 Y49E10.1 | EVIELPVK               | 32  | 2581  | 0.69 | 0.19 | 27 |
| 10 Y49E10.1 | EVIELPVK               | 30  | 2259  | 0.70 | 0.18 | 25 |
| 7 Y49E10.1  | EVIELPVK               | 14  | 1906  | 0.92 | 0.08 | 8  |

|              |                     |    |       |      |      |    |
|--------------|---------------------|----|-------|------|------|----|
| 22 Y49E10.1  | EVIELPVK            | 14 | 1546  | 0.93 | 0.16 | 18 |
| 1 Y49E10.1   | GVLLFGPPGTGK        | 18 | 729   | 1.07 | 0.16 | 15 |
| 22 Y49E10.1  | EVIELPVK            | 14 | 871   | 1.11 | 0.23 | 21 |
| 10 Y49E10.1  | GVLLFGPPGTGK        | 14 | 2476  | 1.12 | 0.07 | 6  |
| 22 Y49E10.1  | EVIELPVK            | 15 | 1721  | 1.18 | 0.27 | 23 |
| 10 Y49E10.1  | ARADILK             | 12 | 1828  | 1.24 | 0.19 | 15 |
| 22 Y49E10.1  | GVLLFGPPGTGK        | 28 | 1958  | 1.26 | 0.08 | 6  |
| 22 Y49E10.1  | EVIELPVK            | 40 | 2407  | 1.27 | 0.16 | 13 |
| 1 Y49E10.1   | HPELFDALGIAQPK      | 35 | 925   | 1.34 | 0.08 | 6  |
| 1 Y49E10.1   | HPELFDALGIAQPK      | 43 | 991   | 1.36 | 0.09 | 7  |
| 10 Y49E10.1  | HPELFDALGIAQPK      | 16 | 3671  | 1.56 | 0.20 | 13 |
| 10 Y49E10.1  | HPELFDALGIAQPK      | 51 | 2310  | 1.56 | 0.15 | 10 |
| 7 Y49E10.1   | HPELFDALGIAQPK      | 12 | 2559  | 1.65 | 0.21 | 13 |
| 10 Y49E10.1  | HPELFDALGIAQPK      | 11 | 3583  | 1.79 | 0.15 | 8  |
| 10 Y49E10.1  | HPELFDALGIAQPK      | 28 | 1909  | 1.81 | 0.12 | 7  |
| 10 Y50D4B.3  | NIERHADDDTYDVYLQK   | 32 | 4742  | 1.83 | 0.15 | 8  |
| 22 Y50D7A.4  | EEGLQRGPQIDAEALLK   | 32 | 2185  | 0.25 | 0.19 | 75 |
| 1 Y50D7A.4   | LEENSTHIVDK         | 20 | 468   | 0.46 | 0.13 | 28 |
| 10 Y50D7A.4  | LEENSTHIVDK         | 12 | 1115  | 0.61 | 0.18 | 30 |
| 10 Y50D7A.4  | AQLAMLDGLAEK        | 45 | 1229  | 0.92 | 0.19 | 20 |
| 10 Y50D7A.4  | FLAYWPK             | 12 | 646   | 1.07 | 0.11 | 10 |
| 10 Y50D7A.4  | YLLRAK              | 16 | 703   | 1.29 | 0.07 | 6  |
| 10 Y50D7A.4  | FLAYWPK             | 14 | 641   | 1.45 | 0.24 | 17 |
| 1 Y50D7A.4   | PTPPGQSSSQPLPAK     | 40 | 1568  | 1.80 | 0.10 | 5  |
| 1 Y50D7A.4   | PTPPGQSSSQPLPAK     | 36 | 1551  | 1.99 | 0.14 | 7  |
| 1 Y50D7A.4   | PTPPGQSSSQPLPAK     | 38 | 1812  | 2.46 | 0.13 | 5  |
| 10 Y50D7A.4  | PTPPGQSSSQPLPAK     | 28 | 4924  | 3.72 | 0.22 | 6  |
| 10 Y50D7A.4  | PTPPGQSSSQPLPAK     | 48 | 5637  | 3.92 | 0.26 | 7  |
| 1 Y53F4B.29  | DFMGSFREVGK         | 11 | 1553  | 0.38 | 0.16 | 42 |
| 7 Y53F4B.29  | AHAAGKPAEEIAK       | 68 | 3227  | 0.45 | 0.09 | 21 |
| 7 Y53F4B.29  | DFMGSFREVGK         | 20 | 4222  | 0.49 | 0.11 | 22 |
| 10 Y53F4B.29 | LVALREK             | 29 | 40015 | 0.55 | 0.09 | 17 |
| 10 Y53F4B.29 | VYAIPAİK            | 53 | 55397 | 0.56 | 0.09 | 17 |
| 1 Y53F4B.29  | DFMGSFREVGK         | 14 | 3317  | 0.61 | 0.29 | 48 |
| 10 Y53F4B.29 | VYAIPAİK            | 42 | 60905 | 0.61 | 0.10 | 16 |
| 10 Y53F4B.29 | LVALREK             | 35 | 38945 | 0.64 | 0.08 | 12 |
| 22 Y53F4B.29 | AHAAGKPAEEIAK       | 55 | 7631  | 0.73 | 0.29 | 40 |
| 22 Y53F4B.29 | AHAAGKPAEEIAK       | 65 | 6784  | 0.80 | 0.26 | 32 |
| 22 Y53F4B.29 | TPEEQAWADAIVDQFK    | 65 | 1764  | 0.91 | 0.16 | 17 |
| 1 Y53F4B.29  | AHAAGKPAEEIAK       | 11 | 29039 | 1.00 | 0.08 | 8  |
| 22 Y53F4B.29 | TPEEQAWADAIVDQFK    | 75 | 827   | 1.09 | 0.15 | 14 |
| 7 Y53F4B.29  | DFMGSFREVGK         | 14 | 7082  | 1.13 | 0.26 | 23 |
| 1 Y53F4B.29  | DFMGSFREVGK         | 11 | 3407  | 1.25 | 0.09 | 7  |
| 10 Y53F4B.29 | AHAAGKPAEEIAK       | 19 | 98561 | 1.27 | 0.14 | 11 |
| 22 Y53F4B.29 | AHAAGKPAEEIAK       | 11 | 4720  | 1.68 | 0.33 | 20 |
| 1 Y53F4B.29  | NQLFTPAGEPK         | 12 | 1939  | 1.86 | 0.12 | 7  |
| 22 Y53F4B.29 | AHAAGKPAEEIAK       | 16 | 36790 | 1.87 | 0.11 | 6  |
| 22 Y53F4B.29 | AHAAGKPAEEIAK       | 11 | 19107 | 2.09 | 0.20 | 10 |
| 10 Y53F4B.29 | LVALREK             | 16 | 5992  | 4.80 | 0.14 | 3  |
| 10 Y53F4B.29 | LVALREK             | 25 | 8797  | 5.69 | 0.14 | 3  |
| 7 Y53F4B.30  | LVALREK             | 24 | 7143  | 0.28 | 0.08 | 28 |
| 7 Y53F4B.30  | LVALREK             | 11 | 6345  | 0.31 | 0.05 | 16 |
| 1 Y53F4B.30  | LVALREK             | 18 | 9518  | 0.36 | 0.07 | 20 |
| 22 Y53F4B.30 | LVALREK             | 37 | 23611 | 0.36 | 0.16 | 44 |
| 1 Y53F4B.30  | LVALREK             | 17 | 11180 | 0.36 | 0.03 | 7  |
| 22 Y53F4B.30 | IIQSDLVPARDAFFVIINK | 20 | 1659  | 0.43 | 0.13 | 31 |
| 22 Y53F4B.30 | LVALREK             | 36 | 27355 | 0.48 | 0.12 | 26 |
| 1 Y53F4B.30  | VYAIPAİK            | 40 | 14061 | 0.71 | 0.08 | 11 |
| 1 Y53F4B.30  | VYAIPAİK            | 39 | 12001 | 0.71 | 0.09 | 12 |
| 7 Y53F4B.30  | TPEEQAWTDAIVDQYK    | 69 | 1857  | 0.72 | 0.12 | 16 |
| 7 Y53F4B.30  | VYAIPAİK            | 35 | 27086 | 0.85 | 0.07 | 8  |
| 7 Y53F4B.30  | VYAIPAİK            | 24 | 31403 | 0.86 | 0.03 | 3  |
| 7 Y53F4B.30  | TPEEQAWTDAIVDQYK    | 63 | 2749  | 0.87 | 0.12 | 14 |
| 22 Y53F4B.30 | VYAIPAİK            | 47 | 64157 | 1.01 | 0.10 | 10 |
| 22 Y53F4B.30 | VYAIPAİK            | 51 | 65808 | 1.15 | 0.15 | 13 |
| 22 Y53F4B.30 | TPEEQAWTDAIVDQYK    | 82 | 3556  | 1.24 | 0.05 | 4  |
| 22 Y53F4B.30 | TPEEQAWTDAIVDQYK    | 72 | 3443  | 1.28 | 0.13 | 10 |
| 1 Y53F4B.30  | TPEEQAWTDAIVDQYK    | 37 | 1070  | 1.75 | 0.14 | 8  |
| 10 Y53F4B.30 | HQLFTASEQPK         | 57 | 3856  | 1.79 | 0.08 | 5  |
| 7 Y53F4B.30  | LVALREK             | 12 | 4189  | 2.21 | 0.09 | 4  |
| 1 Y53F4B.30  | TPEEQAWTDAIVDQYK    | 50 | 1387  | 2.63 | 0.31 | 12 |
| 7 Y53F4B.30  | HQLFTASEQPK         | 78 | 8858  | 2.84 | 0.16 | 5  |
| 22 Y53F4B.30 | HQLFTASEQPK         | 19 | 5938  | 3.00 | 0.23 | 8  |
| 1 Y53F4B.30  | VYAIPAİK            | 10 | 1628  | 3.06 | 0.21 | 7  |
| 10 Y53F4B.30 | HQLFTASEQPK         | 20 | 8009  | 3.07 | 0.08 | 3  |
| 1 Y53F4B.30  | HQLFTASEQPK         | 61 | 10251 | 3.28 | 0.17 | 5  |
| 1 Y53F4B.30  | LVALREK             | 23 | 3579  | 3.44 | 0.18 | 5  |
| 1 Y53F4B.30  | VYAIPAİK            | 11 | 2034  | 3.62 | 0.07 | 2  |
| 22 Y53F4B.30 | HQLFTASEQPK         | 76 | 15967 | 3.83 | 0.11 | 3  |
| 7 Y53F4B.30  | HQLFTASEQPK         | 65 | 6764  | 4.28 | 0.15 | 3  |
| 22 Y53F4B.30 | LVALREK             | 25 | 3718  | 4.39 | 0.12 | 3  |
| 22 Y53F4B.30 | HQLFTASEQPK         | 72 | 10629 | 4.88 | 0.09 | 2  |
| 1 Y53F4B.30  | HQLFTASEQPK         | 51 | 6633  | 4.94 | 0.19 | 4  |
| 10 Y53F4B.30 | HQLFTASEQPK         | 50 | 15749 | 5.50 | 0.21 | 4  |
| 10 Y53F4B.30 | HQLFTASEQPK         | 43 | 12665 | 7.01 | 0.18 | 3  |
| 7 Y53F4B.31  | ITSEVVIPARDSYFK     | 46 | 3957  | 0.51 | 0.14 | 27 |
| 10 Y53F4B.31 | ILNGLLEK            | 33 | 2691  | 0.52 | 0.11 | 22 |
| 7 Y53F4B.31  | ITSEVVIPARDSYFK     | 59 | 4927  | 0.54 | 0.07 | 12 |
| 1 Y53F4B.31  | ITSEVVIPARDSYFK     | 40 | 2050  | 0.56 | 0.19 | 34 |
| 10 Y53F4B.31 | ILNGLLEK            | 57 | 2715  | 0.58 | 0.17 | 29 |
| 1 Y53F4B.31  | ITSEVVIPARDSYFK     | 33 | 1725  | 0.60 | 0.15 | 24 |
| 10 Y53F4B.31 | ITSEVVIPARDSYFK     | 65 | 6633  | 0.64 | 0.10 | 15 |
| 7 Y53F4B.31  | NQLFVASEQPNLAALREK  | 20 | 3247  | 0.72 | 0.10 | 13 |
| 22 Y53F4B.31 | VYAIPAİK            | 27 | 6011  | 0.74 | 0.14 | 19 |
| 10 Y53F4B.31 | VYAIPAİK            | 12 | 5028  | 0.78 | 0.11 | 14 |
| 1 Y53F4B.31  | ITSEVVIPARDSYFK     | 19 | 1509  | 0.79 | 0.11 | 14 |
| 22 Y53F4B.31 | ITSEVVIPARDSYFK     | 36 | 6637  | 0.81 | 0.11 | 13 |
| 10 Y53F4B.31 | ITSEVVIPARDSYFK     | 58 | 5934  | 0.82 | 0.08 | 10 |
| 7 Y53F4B.31  | ILNGLLEK            | 21 | 1495  | 0.82 | 0.24 | 30 |
| 7 Y53F4B.31  | ILNGLLEK            | 23 | 2195  | 0.86 | 0.09 | 10 |
| 1 Y53F4B.31  | NQLFVASEQPNLAALREK  | 18 | 2152  | 0.86 | 0.16 | 18 |

|                          |                    |    |       |       |      |     |
|--------------------------|--------------------|----|-------|-------|------|-----|
| 7 Y53F4B.31              | NQLFVASEQPNLAALREK | 22 | 3645  | 0.89  | 0.12 | 13  |
| 22 Y53F4B.31             | ITSEVVIPARDSYFK    | 57 | 6555  | 0.94  | 0.10 | 11  |
| 22 Y53F4B.31             | TPEEQVWADAIVDQFK   | 53 | 1649  | 1.05  | 0.09 | 9   |
| 22 Y53F4B.31             | TPEEQVWADAIVDQFK   | 54 | 1388  | 1.09  | 0.09 | 9   |
| 22 Y53F4B.31             | VYAIPAIRK          | 12 | 4219  | 1.19  | 0.26 | 22  |
| 7 Y53F4B.31              | VYAIPAIRK          | 39 | 24966 | 1.55  | 0.13 | 8   |
| 7 Y53F4B.31              | VYAIPAIRK          | 42 | 18265 | 1.71  | 0.15 | 9   |
| 10 Y53F4B.31             | NQLFVASEQPNLAALREK | 11 | 2968  | 1.89  | 0.14 | 8   |
| 22 Y53F4B.31             | NQLFVASEQPNLAALREK | 11 | 1881  | 1.92  | 0.13 | 7   |
| 22 Y53F4B.31             | VYAIPAIRK          | 16 | 25508 | 2.39  | 0.08 | 4   |
| 22 Y53F4B.31             | VYAIPAIRK          | 45 | 27124 | 2.61  | 0.13 | 5   |
| 1 Y53F4B.31              | VYAIPAIRK          | 46 | 12289 | 2.75  | 0.15 | 5   |
| 1 Y53F4B.31              | VYAIPAIRK          | 44 | 12044 | 3.00  | 0.10 | 3   |
| 10 Y53F4B.31             | VYAIPAIRK          | 22 | 37642 | 3.09  | 0.15 | 5   |
| 10 Y53F4B.31             | VYAIPAIRK          | 48 | 41324 | 3.21  | 0.09 | 3   |
| 22 Y53F4B.33             | ILNGLLEK           | 49 | 3088  | 0.66  | 0.09 | 14  |
| 10 Y53F4B.33             | ISSEVAIPARDSYFK    | 61 | 4995  | 0.68  | 0.13 | 19  |
| 10 Y53F4B.33             | NQFFTASEHPK        | 26 | 2906  | 0.76  | 0.07 | 9   |
| 22 Y53F4B.33             | ILNGLLEK           | 32 | 1737  | 0.78  | 0.17 | 22  |
| 10 Y53F4B.33             | NQFFTASEHPK        | 58 | 6660  | 0.85  | 0.05 | 6   |
| 7 Y53F4B.33              | ISSEVAIPARDSYFK    | 15 | 2014  | 0.87  | 0.14 | 16  |
| 22 Y53F4B.33             | NQFFTASEHPK        | 48 | 3647  | 0.87  | 0.08 | 10  |
| 10 Y53F4B.33             | ISSEVAIPARDSYFK    | 57 | 4372  | 0.90  | 0.11 | 12  |
| 1 Y53F4B.33              | ISSEVAIPARDSYFK    | 32 | 1706  | 1.04  | 0.20 | 19  |
| 22 Y53F4B.33             | ISSEVAIPARDSYFK    | 55 | 4229  | 1.11  | 0.11 | 10  |
| 1 Y53F4B.33              | ISSEVAIPARDSYFK    | 57 | 2420  | 1.18  | 0.14 | 12  |
| 7 Y53F4B.33              | NQFFTASEHPK        | 66 | 5690  | 2.02  | 0.13 | 7   |
| 7 Y53F4B.33              | NQFFTASEHPK        | 53 | 4023  | 2.04  | 0.08 | 4   |
| 1 Y53F4B.33              | NQFFTASEHPK        | 43 | 6910  | 2.38  | 0.06 | 3   |
| 1 Y53F4B.33              | NQFFTASEHPK        | 65 | 6058  | 2.50  | 0.13 | 5   |
| 10 Y53F4B.33             | NQFFTASEHPK        | 53 | 10822 | 2.68  | 0.06 | 2   |
| 22 Y53F4B.33             | VHAVPAIK           | 12 | 14730 | 2.69  | 0.12 | 5   |
| 10 Y53F4B.33             | NQFFTASEHPK        | 53 | 7996  | 2.99  | 0.10 | 3   |
| 22 Y53F4B.33             | NQFFTASEHPK        | 52 | 6299  | 3.04  | 0.11 | 3   |
| 7 Y53F4B.33              | VHAVPAIK           | 14 | 6462  | 3.05  | 0.09 | 3   |
| 1 Y53F4B.33              | VHAVPAIK           | 16 | 11686 | 3.24  | 0.08 | 2   |
| 10 Y53F4B.33             | VHAVPAIK           | 17 | 15972 | 3.70  | 0.08 | 2   |
| 1 Y53F4B.33              | VHAVPAIK           | 17 | 9073  | 3.82  | 0.10 | 3   |
| 10 Y53F4B.33             | VHAVPAIK           | 12 | 7158  | 10.43 | 0.56 | 5   |
| 7 Y53F4B.39a             | DLNATRIYPGHGPVIDK  | 26 | 2871  | 0.24  | 0.17 | 68  |
| 7 Y53F4B.39a             | DLNATRIYPGHGPVIDK  | 18 | 3505  | 0.27  | 0.54 | 203 |
| 10 Y53F4B.39a            | DLNATRIYPGHGPVIDK  | 12 | 3597  | 0.72  | 0.12 | 17  |
| 7 Y53F4B.39a             | DLNATRIYPGHGPVIDK  | 13 | 2434  | 0.92  | 0.50 | 55  |
| 10 Y53F4B.39a            | PSLTHVEPIEK        | 30 | 6356  | 2.65  | 0.16 | 6   |
| 10 Y53F4B.39a            | PSLTHVEPIEK        | 25 | 8221  | 2.79  | 0.22 | 8   |
| 22 Y53F4B.39a;Y53F4B.39b | DLNATRIYPGHGPVIDK  | 30 | 3777  | 0.65  | 0.06 | 10  |
| 22 Y53F4B.39a;Y53F4B.39b | DGVVENPHFETFK      | 34 | 1910  | 0.72  | 0.19 | 26  |
| 22 Y53F4B.39a;Y53F4B.39b | DLNATRIYPGHGPVIDK  | 32 | 2124  | 1.08  | 0.29 | 27  |
| 1 Y53F4B.39a;Y53F4B.39b  | DLNATRIYPGHGPVIDK  | 25 | 3136  | 1.24  | 0.18 | 15  |
| 1 Y53F4B.39a;Y53F4B.39b  | DLNATRIYPGHGPVIDK  | 32 | 3332  | 1.28  | 0.17 | 13  |
| 22 Y53F4B.39a;Y53F4B.39b | PSLTHVEPIEK        | 20 | 4981  | 2.81  | 0.11 | 4   |
| 22 Y53F4B.39a;Y53F4B.39b | PSLTHVEPIEK        | 41 | 4115  | 3.10  | 0.20 | 6   |
| 1 Y53G8AR.2a             | SSNEMDLK           | 10 | 848   | 1.10  | 0.07 | 6   |
| 10 Y54E10A.3             | PVINVK             | 11 | 752   | 1.28  | 0.16 | 13  |
| 10 Y54E10A.3             | VFINLPK            | 10 | 767   | 2.28  | 0.12 | 5   |
| 22 Y54E10A.6             | IPASLTSHNLSAK      | 13 | 4350  | 1.16  | 0.19 | 17  |
| 22 Y54E10A.6             | IPASLTSHNLSAK      | 23 | 4816  | 1.25  | 0.19 | 15  |
| 22 Y54E2A.11a            | LGVPTVGVTNMK       | 17 | 1465  | 0.41  | 0.45 | 112 |
| 22 Y54E2A.11a            | LGVPTVGVTNMK       | 17 | 1530  | 0.64  | 0.19 | 30  |
| 22 Y54E2A.11a            | RTNVIEHPLFNK       | 19 | 8710  | 0.73  | 0.17 | 24  |
| 22 Y54E2A.11a            | QGIIWGGK           | 51 | 2162  | 0.84  | 0.10 | 12  |
| 22 Y54E2A.11a            | RTNVIEHPLFNK       | 14 | 9557  | 0.89  | 0.20 | 23  |
| 22 Y54E2A.11a            | QGIIWGGK           | 41 | 1578  | 0.92  | 0.15 | 16  |
| 22 Y54E2A.11a            | SLNGYAFDK          | 21 | 1344  | 1.02  | 0.26 | 26  |
| 22 Y54E2A.11a            | RTNVIEHPLFNK       | 19 | 3572  | 1.03  | 0.13 | 12  |
| 22 Y54E2A.11a            | QGIIWGGK           | 38 | 1934  | 1.14  | 0.10 | 9   |
| 22 Y54E2A.11a            | RTNVIEHPLFNK       | 11 | 13413 | 1.28  | 0.13 | 10  |
| 22 Y54E2A.11a            | SLNGYAFDK          | 11 | 902   | 1.34  | 0.19 | 14  |
| 22 Y54E2A.11a            | RTNVIEHPLFNK       | 13 | 11012 | 1.65  | 0.05 | 3   |
| 7 Y54E2A.11a;Y54E2A.11b  | QGIIWGGK           | 29 | 1583  | 0.43  | 0.14 | 32  |
| 10 Y54E2A.11a;Y54E2A.11b | VLERLDPVK          | 30 | 6495  | 0.47  | 0.07 | 15  |
| 10 Y54E2A.11a;Y54E2A.11b | QGIIWGGK           | 60 | 2665  | 0.49  | 0.06 | 12  |
| 10 Y54E2A.11a;Y54E2A.11b | LGVPTVGVTNMK       | 15 | 1916  | 0.76  | 0.16 | 21  |
| 7 Y54E2A.11a;Y54E2A.11b  | QGIIWGGK           | 33 | 1922  | 0.80  | 0.11 | 13  |
| 7 Y54E2A.11a;Y54E2A.11b  | RTNVIEHPLFNK       | 12 | 3715  | 1.11  | 0.07 | 6   |
| 10 Y54E2A.11a;Y54E2A.11b | RTNVIEHPLFNK       | 13 | 9485  | 1.14  | 0.14 | 13  |
| 7 Y54E2A.11a;Y54E2A.11b  | VLERLDPVK          | 14 | 7171  | 1.21  | 0.31 | 25  |
| 7 Y54E2A.11a;Y54E2A.11b  | SLNGYAFDK          | 13 | 1652  | 1.30  | 0.15 | 12  |
| 10 Y54E2A.11a;Y54E2A.11b | RTNVIEHPLFNK       | 12 | 8181  | 1.47  | 0.11 | 7   |
| 1 Y54E2A.11a;Y54E2A.11b  | RTNVIEHPLFNK       | 14 | 3215  | 2.53  | 0.47 | 18  |
| 10 Y54E2A.11a;Y54E2A.11b | RTNVIEHPLFNK       | 11 | 6791  | 3.98  | 0.16 | 4   |
| 1 Y54F10BM.2             | SFVYVDEK           | 12 | 4179  | 0.67  | 0.60 | 89  |
| 10 Y54G11A.6;Y54G11A.13  | GAGAHGYFEVTHDITK   | 13 | 4476  | 1.09  | 0.09 | 8   |
| 10 Y54G11A.6;Y54G11A.13  | GAGAHGYFEVTHDITK   | 13 | 4951  | 1.11  | 0.12 | 11  |
| 10 Y54G11A.6;Y54G11A.13  | GAGAHGYFEVTHDITK   | 19 | 3612  | 1.60  | 0.21 | 13  |
| 10 Y54G11A.7             | NWALTPELLVERETLK   | 12 | 395   | 0.49  | 0.07 | 14  |
| 22 Y54G11A.7             | LDDYPTDLIAVK       | 14 | 772   | 0.69  | 0.18 | 26  |
| 1 Y54G11A.7              | YSSLLSEDNAQISK     | 52 | 1068  | 0.78  | 0.13 | 16  |
| 10 Y54G11A.7             | YSSLLSEDNAQISK     | 39 | 979   | 0.98  | 0.10 | 10  |
| 22 Y54G11A.7             | LDDYPTDLIAVK       | 36 | 701   | 1.05  | 0.09 | 9   |
| 22 Y54G2A.45             | WLPLFGAGATNAK      | 42 | 1086  | 1.01  | 0.14 | 14  |
| 10 Y54G9A.6              | RIIQLHK            | 12 | 946   | 2.81  | 0.31 | 11  |
| 10 Y54G9A.6              | RIIQLHK            | 19 | 1618  | 5.46  | 0.18 | 3   |
| 22 Y55B1BR.2             | GEFYHALAK          | 20 | 1952  | 3.17  | 0.39 | 12  |
| 22 Y55F3AM.13            | VGASRGVSFEGEVK     | 33 | 4759  | 0.78  | 0.20 | 26  |
| 10 Y55F3AM.13            | VGASRGVSFEGEVK     | 36 | 3371  | 0.90  | 0.10 | 11  |
| 22 Y55F3AM.13            | LLVSLGEAGK         | 19 | 2278  | 1.20  | 0.24 | 20  |
| 10 Y55F3AM.13            | VGASRGVSFEGEVK     | 28 | 4248  | 1.23  | 0.05 | 4   |
| 22 Y55F3AM.13            | LLVSLGEAGK         | 48 | 3695  | 1.24  | 0.15 | 12  |
| 1 Y55F3AR.3              | FAHALETLPK         | 35 | 1565  | 0.12  | 0.16 | 138 |
| 1 Y55F3AR.3              | LATDAASTILK        | 14 | 425   | 0.19  | 0.14 | 75  |

|              |                  |     |       |      |      |    |
|--------------|------------------|-----|-------|------|------|----|
| 1 Y55F3AR.3  | LATDAASTILK      | 42  | 599   | 0.20 | 0.09 | 45 |
| 22 Y55F3AR.3 | ALEILPTLVVK      | 20  | 1092  | 0.33 | 0.06 | 19 |
| 22 Y55F3AR.3 | QYDNEDIIADLVAK   | 28  | 998   | 0.36 | 0.24 | 66 |
| 10 Y55F3AR.3 | LYAEHVAGK        | 30  | 7864  | 0.36 | 0.16 | 45 |
| 22 Y55F3AR.3 | QYDNEDIIADLVAK   | 34  | 1087  | 0.40 | 0.16 | 41 |
| 10 Y55F3AR.3 | LYAEHVAGK        | 36  | 7530  | 0.41 | 0.15 | 37 |
| 22 Y55F3AR.3 | ALEILPTLVVK      | 14  | 670   | 0.43 | 0.06 | 15 |
| 1 Y55F3AR.3  | LFVTNDAATILK     | 37  | 649   | 0.45 | 0.22 | 48 |
| 7 Y55F3AR.3  | LATDAASTILK      | 18  | 2073  | 0.46 | 0.14 | 32 |
| 22 Y55F3AR.3 | ALEILPTLVVK      | 14  | 1343  | 0.46 | 0.29 | 63 |
| 22 Y55F3AR.3 | QYDNEDIIADLVAK   | 30  | 814   | 0.47 | 0.16 | 34 |
| 10 Y55F3AR.3 | LFVTNDAATILK     | 20  | 605   | 0.48 | 0.23 | 47 |
| 10 Y55F3AR.3 | FAHALETLPK       | 24  | 2405  | 0.48 | 0.11 | 22 |
| 22 Y55F3AR.3 | ALEILPTLVVK      | 18  | 1369  | 0.48 | 0.14 | 29 |
| 22 Y55F3AR.3 | LLAGAGAVEIELAK   | 113 | 2118  | 0.49 | 0.20 | 41 |
| 10 Y55F3AR.3 | FGDMYLHFLNK      | 13  | 1045  | 0.50 | 0.14 | 28 |
| 7 Y55F3AR.3  | LFVTNDAATILK     | 57  | 1220  | 0.51 | 0.22 | 44 |
| 10 Y55F3AR.3 | LFVTNDAATILK     | 70  | 1082  | 0.51 | 0.12 | 24 |
| 22 Y55F3AR.3 | LFVTNDAATILK     | 56  | 1013  | 0.51 | 0.12 | 24 |
| 7 Y55F3AR.3  | FAHALETLPK       | 16  | 2445  | 0.51 | 0.17 | 34 |
| 22 Y55F3AR.3 | LLAGAGAVEIELAK   | 108 | 2055  | 0.52 | 0.14 | 27 |
| 1 Y55F3AR.3  | FAHALETLPK       | 13  | 1465  | 0.53 | 0.26 | 50 |
| 10 Y55F3AR.3 | LFVTNDAATILK     | 51  | 1038  | 0.54 | 0.28 | 52 |
| 7 Y55F3AR.3  | LFVTNDAATILK     | 49  | 1633  | 0.54 | 0.13 | 24 |
| 10 Y55F3AR.3 | LYAEHVAGK        | 31  | 13855 | 0.54 | 0.13 | 23 |
| 1 Y55F3AR.3  | LFVTNDAATILK     | 44  | 592   | 0.54 | 0.20 | 37 |
| 7 Y55F3AR.3  | LLAGAGAVEIELAK   | 88  | 2166  | 0.55 | 0.14 | 25 |
| 7 Y55F3AR.3  | FAHALETLPK       | 11  | 1529  | 0.57 | 0.16 | 27 |
| 10 Y55F3AR.3 | LATDAASTILK      | 38  | 2722  | 0.58 | 0.24 | 42 |
| 10 Y55F3AR.3 | ALEILPTLVVK      | 27  | 964   | 0.59 | 0.31 | 53 |
| 22 Y55F3AR.3 | LFVTNDAATILK     | 43  | 864   | 0.59 | 0.17 | 28 |
| 22 Y55F3AR.3 | GTVLIENADELRNFSK | 68  | 2339  | 0.60 | 0.09 | 15 |
| 22 Y55F3AR.3 | LATDAASTILK      | 47  | 2495  | 0.61 | 0.17 | 28 |
| 7 Y55F3AR.3  | LATDAASTILK      | 21  | 1705  | 0.62 | 0.09 | 14 |
| 1 Y55F3AR.3  | ALEILPTLVVK      | 45  | 719   | 0.62 | 0.13 | 21 |
| 22 Y55F3AR.3 | LATDAASTILK      | 59  | 2629  | 0.62 | 0.14 | 23 |
| 10 Y55F3AR.3 | LFVTNDAATILK     | 73  | 2014  | 0.62 | 0.15 | 24 |
| 1 Y55F3AR.3  | LATDAASTILK      | 40  | 715   | 0.62 | 0.20 | 31 |
| 22 Y55F3AR.3 | LATDAASTILK      | 28  | 3600  | 0.63 | 0.15 | 24 |
| 22 Y55F3AR.3 | LATDAASTILK      | 56  | 2668  | 0.63 | 0.19 | 30 |
| 1 Y55F3AR.3  | LFVTNDAATILK     | 51  | 802   | 0.64 | 0.18 | 29 |
| 22 Y55F3AR.3 | ALEILPTLVVK      | 19  | 1215  | 0.65 | 0.18 | 28 |
| 1 Y55F3AR.3  | LFVTNDAATILK     | 60  | 696   | 0.65 | 0.12 | 19 |
| 10 Y55F3AR.3 | LFVTNDAATILK     | 67  | 1293  | 0.66 | 0.11 | 17 |
| 10 Y55F3AR.3 | LYAEHVAGK        | 35  | 9998  | 0.66 | 0.17 | 26 |
| 10 Y55F3AR.3 | FAHALETLPK       | 15  | 1325  | 0.66 | 0.17 | 26 |
| 1 Y55F3AR.3  | ALEILPTLVVK      | 11  | 1043  | 0.66 | 0.20 | 30 |
| 22 Y55F3AR.3 | FGDMYLHFLNK      | 23  | 2086  | 0.66 | 0.20 | 30 |
| 22 Y55F3AR.3 | FAHALETLPK       | 34  | 5379  | 0.66 | 0.09 | 14 |
| 10 Y55F3AR.3 | LATDAASTILK      | 62  | 2943  | 0.67 | 0.07 | 11 |
| 7 Y55F3AR.3  | ALEILPTLVVK      | 38  | 2922  | 0.67 | 0.12 | 19 |
| 10 Y55F3AR.3 | LATDAASTILK      | 41  | 2878  | 0.67 | 0.08 | 11 |
| 7 Y55F3AR.3  | LLAGAGAVEIELAK   | 113 | 2073  | 0.67 | 0.16 | 24 |
| 10 Y55F3AR.3 | QYDNEDIIADLVAK   | 76  | 2619  | 0.68 | 0.16 | 24 |
| 7 Y55F3AR.3  | FAHALETLPK       | 11  | 3189  | 0.68 | 0.09 | 12 |
| 22 Y55F3AR.3 | LATDAASTILK      | 53  | 2674  | 0.69 | 0.09 | 13 |
| 10 Y55F3AR.3 | LATDAASTILK      | 41  | 1936  | 0.70 | 0.14 | 21 |
| 22 Y55F3AR.3 | ALEILPTLVVK      | 18  | 1647  | 0.70 | 0.14 | 19 |
| 7 Y55F3AR.3  | LFVTNDAATILK     | 50  | 1410  | 0.70 | 0.20 | 28 |
| 10 Y55F3AR.3 | QYDNEDIIADLVAK   | 84  | 1870  | 0.71 | 0.15 | 21 |
| 22 Y55F3AR.3 | LFVTNDAATILK     | 66  | 2818  | 0.71 | 0.14 | 20 |
| 10 Y55F3AR.3 | LFVTNDAATILK     | 56  | 1030  | 0.71 | 0.18 | 26 |
| 10 Y55F3AR.3 | LFVTNDAATILK     | 19  | 675   | 0.72 | 0.32 | 45 |
| 7 Y55F3AR.3  | MVINHIEK         | 11  | 3732  | 0.72 | 0.14 | 19 |
| 22 Y55F3AR.3 | LFVTNDAATILK     | 27  | 768   | 0.72 | 0.15 | 21 |
| 10 Y55F3AR.3 | LATDAASTILK      | 55  | 3867  | 0.72 | 0.11 | 16 |
| 10 Y55F3AR.3 | LFVTNDAATILK     | 57  | 1279  | 0.74 | 0.15 | 21 |
| 10 Y55F3AR.3 | LATDAASTILK      | 37  | 1343  | 0.74 | 0.17 | 23 |
| 7 Y55F3AR.3  | LATDAASTILK      | 63  | 3479  | 0.75 | 0.17 | 23 |
| 7 Y55F3AR.3  | LATDAASTILK      | 70  | 2717  | 0.75 | 0.19 | 25 |
| 22 Y55F3AR.3 | ALEILPTLVVK      | 16  | 884   | 0.75 | 0.09 | 12 |
| 7 Y55F3AR.3  | FAHALETLPK       | 15  | 2221  | 0.75 | 0.10 | 13 |
| 10 Y55F3AR.3 | QYDNEDIIADLVAK   | 63  | 1425  | 0.76 | 0.14 | 18 |
| 22 Y55F3AR.3 | LATDAASTILK      | 70  | 3661  | 0.76 | 0.17 | 23 |
| 1 Y55F3AR.3  | LATDAASTILK      | 21  | 495   | 0.76 | 0.14 | 19 |
| 10 Y55F3AR.3 | FAHALETLPK       | 22  | 5462  | 0.76 | 0.09 | 11 |
| 1 Y55F3AR.3  | LFVTNDAATILK     | 23  | 560   | 0.77 | 0.19 | 25 |
| 1 Y55F3AR.3  | LFVTNDAATILK     | 49  | 565   | 0.77 | 0.19 | 24 |
| 10 Y55F3AR.3 | LATDAASTILK      | 74  | 3505  | 0.77 | 0.12 | 15 |
| 22 Y55F3AR.3 | QYDNEDIIADLVAK   | 54  | 1116  | 0.78 | 0.16 | 20 |
| 22 Y55F3AR.3 | ALEILPTLVVK      | 14  | 1047  | 0.78 | 0.09 | 11 |
| 7 Y55F3AR.3  | FAHALETLPK       | 11  | 3645  | 0.78 | 0.14 | 17 |
| 7 Y55F3AR.3  | LFVTNDAATILK     | 69  | 2090  | 0.79 | 0.18 | 23 |
| 10 Y55F3AR.3 | FAHALETLPK       | 20  | 5882  | 0.79 | 0.15 | 19 |
| 10 Y55F3AR.3 | LATDAASTILK      | 64  | 2590  | 0.79 | 0.14 | 17 |
| 10 Y55F3AR.3 | FGDMYLHFLNK      | 13  | 1674  | 0.79 | 0.17 | 22 |
| 22 Y55F3AR.3 | LATDAASTILK      | 15  | 2485  | 0.80 | 0.10 | 12 |
| 22 Y55F3AR.3 | MVINHIEK         | 12  | 6583  | 0.80 | 0.10 | 13 |
| 22 Y55F3AR.3 | FGDMYLHFLNK      | 14  | 1571  | 0.80 | 0.08 | 10 |
| 1 Y55F3AR.3  | LATDAASTILK      | 51  | 1404  | 0.81 | 0.11 | 14 |
| 22 Y55F3AR.3 | GTVLIENADELRNFSK | 66  | 1869  | 0.81 | 0.20 | 25 |
| 7 Y55F3AR.3  | FAHALETLPK       | 12  | 3621  | 0.81 | 0.14 | 17 |
| 1 Y55F3AR.3  | QYDNEDIIADLVAK   | 43  | 501   | 0.82 | 0.18 | 22 |
| 22 Y55F3AR.3 | FAHALETLPK       | 20  | 4254  | 0.82 | 0.19 | 23 |
| 7 Y55F3AR.3  | FAHALETLPK       | 21  | 2480  | 0.83 | 0.10 | 13 |
| 22 Y55F3AR.3 | LATDAASTILK      | 61  | 2280  | 0.83 | 0.12 | 14 |
| 7 Y55F3AR.3  | LATDAASTILK      | 32  | 1411  | 0.84 | 0.22 | 26 |
| 10 Y55F3AR.3 | FAHALETLPK       | 23  | 7118  | 0.84 | 0.10 | 12 |
| 22 Y55F3AR.3 | LFVTNDAATILK     | 66  | 1978  | 0.85 | 0.15 | 18 |
| 7 Y55F3AR.3  | ALEILPTLVVK      | 20  | 1898  | 0.85 | 0.09 | 10 |
| 22 Y55F3AR.3 | MVINHIEK         | 17  | 4877  | 0.86 | 0.08 | 10 |

|    |           |                  |    |       |      |      |    |
|----|-----------|------------------|----|-------|------|------|----|
| 22 | Y55F3AR.3 | LYAEHVAGK        | 54 | 7175  | 0.86 | 0.16 | 18 |
| 22 | Y55F3AR.3 | FAHALETLPK       | 13 | 2156  | 0.86 | 0.16 | 19 |
| 7  | Y55F3AR.3 | LATDAASTILK      | 51 | 2008  | 0.86 | 0.14 | 16 |
| 10 | Y55F3AR.3 | LATDAASTILK      | 34 | 1136  | 0.87 | 0.14 | 17 |
| 7  | Y55F3AR.3 | ALEILPTLVVK      | 22 | 1937  | 0.87 | 0.14 | 16 |
| 7  | Y55F3AR.3 | ALEILPTLVVK      | 33 | 1916  | 0.87 | 0.07 | 8  |
| 10 | Y55F3AR.3 | MVINHIEK         | 24 | 19076 | 0.87 | 0.07 | 8  |
| 22 | Y55F3AR.3 | LFVTNDAATILK     | 35 | 1327  | 0.87 | 0.21 | 24 |
| 22 | Y55F3AR.3 | LFVTNDAATILK     | 40 | 715   | 0.87 | 0.16 | 19 |
| 7  | Y55F3AR.3 | ALEILPTLVVK      | 17 | 1374  | 0.88 | 0.14 | 16 |
| 10 | Y55F3AR.3 | LFVTNDAATILK     | 38 | 680   | 0.88 | 0.31 | 35 |
| 7  | Y55F3AR.3 | QYDNEDIADLVAK    | 57 | 1547  | 0.88 | 0.27 | 30 |
| 1  | Y55F3AR.3 | LATDAASTILK      | 37 | 677   | 0.88 | 0.22 | 25 |
| 1  | Y55F3AR.3 | LFVTNDAATILK     | 62 | 800   | 0.90 | 0.12 | 13 |
| 7  | Y55F3AR.3 | FAHALETLPK       | 17 | 2580  | 0.90 | 0.20 | 22 |
| 10 | Y55F3AR.3 | MVINHIEK         | 25 | 21622 | 0.90 | 0.04 | 5  |
| 22 | Y55F3AR.3 | LYAEHVAGK        | 25 | 5207  | 0.90 | 0.22 | 25 |
| 10 | Y55F3AR.3 | ALEILPTLVVK      | 17 | 1197  | 0.90 | 0.11 | 12 |
| 10 | Y55F3AR.3 | LATDAASTILK      | 50 | 3085  | 0.91 | 0.18 | 20 |
| 10 | Y55F3AR.3 | FAHALETLPK       | 42 | 3546  | 0.91 | 0.12 | 14 |
| 7  | Y55F3AR.3 | LATDAASTILK      | 47 | 2048  | 0.91 | 0.20 | 22 |
| 10 | Y55F3AR.3 | LATDAASTILK      | 37 | 1364  | 0.91 | 0.09 | 10 |
| 10 | Y55F3AR.3 | ALEILPTLVVK      | 34 | 1553  | 0.92 | 0.11 | 11 |
| 1  | Y55F3AR.3 | LATDAASTILK      | 45 | 1998  | 0.92 | 0.15 | 17 |
| 1  | Y55F3AR.3 | FAHALETLPK       | 33 | 3258  | 0.92 | 0.11 | 12 |
| 7  | Y55F3AR.3 | FAHALETLPK       | 32 | 4040  | 0.93 | 0.12 | 13 |
| 10 | Y55F3AR.3 | MVINHIEK         | 14 | 5056  | 0.93 | 0.13 | 14 |
| 10 | Y55F3AR.3 | GTVLIENADELRNFSK | 11 | 2856  | 0.93 | 0.22 | 23 |
| 10 | Y55F3AR.3 | FAHALETLPK       | 60 | 31433 | 0.93 | 0.09 | 10 |
| 7  | Y55F3AR.3 | FGDMYLHFLNK      | 22 | 1713  | 0.93 | 0.16 | 17 |
| 22 | Y55F3AR.3 | LFVTNDAATILK     | 76 | 2917  | 0.93 | 0.09 | 9  |
| 7  | Y55F3AR.3 | FAHALETLPK       | 35 | 4025  | 0.93 | 0.11 | 12 |
| 22 | Y55F3AR.3 | LATDAASTILK      | 40 | 3921  | 0.94 | 0.13 | 14 |
| 1  | Y55F3AR.3 | FAHALETLPK       | 19 | 1372  | 0.94 | 0.18 | 19 |
| 1  | Y55F3AR.3 | ALEILPTLVVK      | 12 | 679   | 0.94 | 0.11 | 11 |
| 7  | Y55F3AR.3 | FAHALETLPK       | 12 | 2934  | 0.94 | 0.10 | 11 |
| 10 | Y55F3AR.3 | MVINHIEK         | 14 | 5369  | 0.95 | 0.15 | 16 |
| 22 | Y55F3AR.3 | LATDAASTILK      | 66 | 3540  | 0.95 | 0.08 | 9  |
| 1  | Y55F3AR.3 | LFVTNDAATILK     | 45 | 696   | 0.95 | 0.11 | 11 |
| 22 | Y55F3AR.3 | MVINHIEK         | 10 | 6221  | 0.95 | 0.07 | 7  |
| 22 | Y55F3AR.3 | FAHALETLPK       | 54 | 18256 | 0.96 | 0.17 | 18 |
| 10 | Y55F3AR.3 | FAHALETLPK       | 17 | 5106  | 0.96 | 0.13 | 14 |
| 10 | Y55F3AR.3 | FAHALETLPK       | 30 | 3447  | 0.97 | 0.16 | 17 |
| 1  | Y55F3AR.3 | FAHALETLPK       | 35 | 5860  | 0.97 | 0.06 | 6  |
| 7  | Y55F3AR.3 | FAHALETLPK       | 41 | 6417  | 0.98 | 0.15 | 15 |
| 22 | Y55F3AR.3 | MVINHIEK         | 11 | 2239  | 0.98 | 0.09 | 9  |
| 22 | Y55F3AR.3 | GTVLIENADELRNFSK | 46 | 2223  | 0.98 | 0.17 | 17 |
| 7  | Y55F3AR.3 | ALEILPTLVVK      | 20 | 1601  | 0.99 | 0.14 | 14 |
| 10 | Y55F3AR.3 | FAHALETLPK       | 37 | 6338  | 0.99 | 0.15 | 16 |
| 10 | Y55F3AR.3 | ALEILPTLVVK      | 12 | 1224  | 1.01 | 0.09 | 9  |
| 1  | Y55F3AR.3 | FAHALETLPK       | 11 | 607   | 1.01 | 0.32 | 32 |
| 10 | Y55F3AR.3 | ALEILPTLVVK      | 17 | 1034  | 1.02 | 0.22 | 21 |
| 22 | Y55F3AR.3 | LATDAASTILK      | 76 | 3205  | 1.03 | 0.14 | 14 |
| 10 | Y55F3AR.3 | ALEILPTLVVK      | 15 | 1339  | 1.03 | 0.15 | 15 |
| 22 | Y55F3AR.3 | QYDNEDIADLVAK    | 38 | 794   | 1.03 | 0.11 | 11 |
| 10 | Y55F3AR.3 | GTVLIENADELRNFSK | 61 | 2000  | 1.03 | 0.10 | 10 |
| 10 | Y55F3AR.3 | LFVTNDAATILK     | 70 | 1085  | 1.03 | 0.22 | 21 |
| 7  | Y55F3AR.3 | FAHALETLPK       | 26 | 3897  | 1.04 | 0.14 | 14 |
| 22 | Y55F3AR.3 | ALEILPTLVVK      | 20 | 1268  | 1.04 | 0.21 | 21 |
| 7  | Y55F3AR.3 | LATDAASTILK      | 21 | 1010  | 1.04 | 0.18 | 18 |
| 7  | Y55F3AR.3 | LATDAASTILK      | 26 | 1416  | 1.04 | 0.07 | 7  |
| 7  | Y55F3AR.3 | LATDAASTILK      | 23 | 1676  | 1.04 | 0.06 | 6  |
| 1  | Y55F3AR.3 | LATDAASTILK      | 89 | 5885  | 1.04 | 0.11 | 11 |
| 22 | Y55F3AR.3 | ALEILPTLVVK      | 17 | 974   | 1.05 | 0.14 | 14 |
| 1  | Y55F3AR.3 | ALEILPTLVVK      | 16 | 821   | 1.05 | 0.09 | 8  |
| 1  | Y55F3AR.3 | LATDAASTILK      | 42 | 731   | 1.05 | 0.16 | 15 |
| 7  | Y55F3AR.3 | ALEILPTLVVK      | 51 | 2498  | 1.06 | 0.16 | 15 |
| 22 | Y55F3AR.3 | FAHALETLPK       | 39 | 8516  | 1.07 | 0.08 | 8  |
| 10 | Y55F3AR.3 | FAHALETLPK       | 21 | 2820  | 1.07 | 0.05 | 5  |
| 22 | Y55F3AR.3 | GTVLIENADELRNFSK | 42 | 3218  | 1.07 | 0.14 | 13 |
| 10 | Y55F3AR.3 | ALEILPTLVVK      | 38 | 2010  | 1.09 | 0.26 | 24 |
| 22 | Y55F3AR.3 | LFVTNDAATILK     | 20 | 556   | 1.09 | 0.08 | 8  |
| 10 | Y55F3AR.3 | MVINHIEK         | 15 | 4842  | 1.10 | 0.09 | 8  |
| 22 | Y55F3AR.3 | FAHALETLPK       | 31 | 14519 | 1.10 | 0.12 | 11 |
| 7  | Y55F3AR.3 | LATDAASTILK      | 71 | 4554  | 1.11 | 0.12 | 11 |
| 22 | Y55F3AR.3 | GTVLIENADELRNFSK | 77 | 2394  | 1.12 | 0.16 | 14 |
| 10 | Y55F3AR.3 | LFVTNDAATILK     | 47 | 1361  | 1.13 | 0.15 | 14 |
| 7  | Y55F3AR.3 | LYAEHVAGK        | 42 | 2839  | 1.13 | 0.18 | 16 |
| 22 | Y55F3AR.3 | ALEILPTLVVK      | 13 | 1512  | 1.13 | 0.16 | 15 |
| 7  | Y55F3AR.3 | LFVTNDAATILK     | 49 | 1030  | 1.13 | 0.15 | 13 |
| 22 | Y55F3AR.3 | LATDAASTILK      | 89 | 4452  | 1.13 | 0.07 | 7  |
| 10 | Y55F3AR.3 | GTVLIENADELRNFSK | 73 | 2547  | 1.14 | 0.08 | 7  |
| 10 | Y55F3AR.3 | MVINHIEK         | 23 | 4019  | 1.14 | 0.10 | 9  |
| 10 | Y55F3AR.3 | MVINHIEK         | 17 | 5894  | 1.15 | 0.08 | 7  |
| 22 | Y55F3AR.3 | LFVTNDAATILK     | 29 | 813   | 1.15 | 0.15 | 13 |
| 10 | Y55F3AR.3 | LFVTNDAATILK     | 52 | 661   | 1.16 | 0.23 | 20 |
| 1  | Y55F3AR.3 | MVINHIEK         | 12 | 3280  | 1.16 | 0.18 | 16 |
| 22 | Y55F3AR.3 | MVINHIEK         | 10 | 2975  | 1.16 | 0.10 | 8  |
| 10 | Y55F3AR.3 | FAHALETLPK       | 27 | 2679  | 1.17 | 0.05 | 5  |
| 1  | Y55F3AR.3 | MVINHIEK         | 12 | 3352  | 1.20 | 0.10 | 8  |
| 1  | Y55F3AR.3 | MVINHIEK         | 19 | 4064  | 1.21 | 0.13 | 11 |
| 10 | Y55F3AR.3 | FAHALETLPK       | 13 | 2740  | 1.21 | 0.16 | 14 |
| 10 | Y55F3AR.3 | LFVTNDAATILK     | 86 | 2029  | 1.22 | 0.09 | 7  |
| 1  | Y55F3AR.3 | ALEILPTLVVK      | 17 | 1329  | 1.25 | 0.04 | 3  |
| 22 | Y55F3AR.3 | GTVLIENADELRNFSK | 56 | 3179  | 1.25 | 0.08 | 6  |
| 7  | Y55F3AR.3 | LFVTNDAATILK     | 38 | 1006  | 1.26 | 0.11 | 9  |
| 10 | Y55F3AR.3 | GTVLIENADELRNFSK | 41 | 1774  | 1.26 | 0.11 | 9  |
| 10 | Y55F3AR.3 | FAHALETLPK       | 30 | 2316  | 1.26 | 0.32 | 25 |
| 7  | Y55F3AR.3 | GTVLIENADELRNFSK | 42 | 2066  | 1.26 | 0.13 | 10 |
| 1  | Y55F3AR.3 | FAHALETLPK       | 10 | 1726  | 1.28 | 0.09 | 7  |
| 10 | Y55F3AR.3 | LFVTNDAATILK     | 67 | 1360  | 1.31 | 0.13 | 10 |

|                |                  |    |       |      |      |     |
|----------------|------------------|----|-------|------|------|-----|
| 10 Y55F3AR.3   | LFVTNDAATILK     | 76 | 1053  | 1.31 | 0.20 | 15  |
| 22 Y55F3AR.3   | GTVLIENADELRNFSK | 48 | 2651  | 1.32 | 0.10 | 8   |
| 7 Y55F3AR.3    | GTVLIENADELRNFSK | 72 | 2806  | 1.33 | 0.14 | 11  |
| 7 Y55F3AR.3    | LYAEHVAGK        | 15 | 4494  | 1.34 | 0.18 | 14  |
| 1 Y55F3AR.3    | MVINHIEK         | 12 | 3630  | 1.34 | 0.15 | 11  |
| 10 Y55F3AR.3   | GTVLIENADELRNFSK | 47 | 1657  | 1.35 | 0.10 | 7   |
| 7 Y55F3AR.3    | LATDAASTILK      | 24 | 937   | 1.35 | 0.44 | 33  |
| 1 Y55F3AR.3    | MVINHIEK         | 11 | 2741  | 1.36 | 0.10 | 7   |
| 1 Y55F3AR.3    | MVINHIEK         | 13 | 3296  | 1.36 | 0.16 | 11  |
| 10 Y55F3AR.3   | FAHALETLPK       | 18 | 2512  | 1.37 | 0.06 | 5   |
| 7 Y55F3AR.3    | QYDNEDIADLVAK    | 21 | 1040  | 1.39 | 0.26 | 18  |
| 22 Y55F3AR.3   | MVINHIEK         | 23 | 9400  | 1.41 | 0.09 | 7   |
| 7 Y55F3AR.3    | GTVLIENADELRNFSK | 70 | 2708  | 1.42 | 0.13 | 9   |
| 10 Y55F3AR.3   | FAHALETLPK       | 38 | 2698  | 1.43 | 0.33 | 23  |
| 10 Y55F3AR.3   | MVINHIEK         | 20 | 3142  | 1.43 | 0.11 | 7   |
| 22 Y55F3AR.3   | LFVTNDAATILK     | 61 | 1922  | 1.44 | 0.18 | 13  |
| 7 Y55F3AR.3    | LFVTNDAATILK     | 55 | 1772  | 1.48 | 0.16 | 11  |
| 10 Y55F3AR.3   | MVINHIEK         | 14 | 2756  | 1.48 | 0.09 | 6   |
| 10 Y55F3AR.3   | LFVTNDAATILK     | 34 | 711   | 1.48 | 0.19 | 13  |
| 22 Y55F3AR.3   | LFVTNDAATILK     | 57 | 1942  | 1.50 | 0.16 | 10  |
| 22 Y55F3AR.3   | MVINHIEK         | 18 | 9822  | 1.50 | 0.11 | 7   |
| 1 Y55F3AR.3    | MVINHIEK         | 28 | 3038  | 1.52 | 0.06 | 4   |
| 7 Y55F3AR.3    | FAHALETLPK       | 30 | 11004 | 1.53 | 0.12 | 8   |
| 22 Y55F3AR.3   | GTVLIENADELRNFSK | 62 | 2305  | 1.54 | 0.12 | 8   |
| 1 Y55F3AR.3    | LFVTNDAATILK     | 52 | 1023  | 1.54 | 0.12 | 8   |
| 10 Y55F3AR.3   | LYAEHVAGK        | 36 | 7722  | 1.55 | 0.11 | 7   |
| 7 Y55F3AR.3    | FAHALETLPK       | 46 | 8590  | 1.56 | 0.10 | 6   |
| 7 Y55F3AR.3    | LATDAASTILK      | 16 | 901   | 1.59 | 0.26 | 17  |
| 7 Y55F3AR.3    | LATDAASTILK      | 82 | 3162  | 1.63 | 0.21 | 13  |
| 22 Y55F3AR.3   | MVINHIEK         | 32 | 5351  | 1.63 | 0.11 | 7   |
| 1 Y55F3AR.3    | ALEILPTLVVK      | 55 | 1464  | 1.67 | 0.09 | 5   |
| 22 Y55F3AR.3   | MVINHIEK         | 38 | 8223  | 1.72 | 0.08 | 5   |
| 7 Y55F3AR.3    | MVINHIEK         | 28 | 3933  | 1.78 | 0.11 | 6   |
| 1 Y55F3AR.3    | MVINHIEK         | 23 | 2428  | 1.82 | 0.14 | 8   |
| 7 Y55F3AR.3    | MVINHIEK         | 13 | 5450  | 1.84 | 0.08 | 5   |
| 22 Y55F3AR.3   | FAHALETLPK       | 17 | 2643  | 1.85 | 0.09 | 5   |
| 22 Y55F3AR.3   | ALEILPTLVVK      | 13 | 1192  | 1.86 | 0.08 | 5   |
| 22 Y55F3AR.3   | FAHALETLPK       | 18 | 3343  | 1.86 | 0.11 | 6   |
| 7 Y55F3AR.3    | MVINHIEK         | 10 | 7698  | 1.91 | 0.13 | 7   |
| 22 Y55F3AR.3   | MVINHIEK         | 31 | 5394  | 1.92 | 0.07 | 4   |
| 7 Y55F3AR.3    | MVINHIEK         | 10 | 6232  | 1.93 | 0.11 | 6   |
| 1 Y55F3AR.3    | MVINHIEK         | 18 | 3575  | 2.03 | 0.12 | 6   |
| 1 Y55F3AR.3    | FAHALETLPK       | 50 | 10272 | 2.14 | 0.17 | 8   |
| 10 Y55F3AR.3   | LFVTNDAATILK     | 62 | 1305  | 2.17 | 0.13 | 6   |
| 1 Y55F3AR.3    | FAHALETLPK       | 56 | 8671  | 2.26 | 0.10 | 4   |
| 1 Y55F3AR.3    | LFVTNDAATILK     | 53 | 890   | 2.29 | 0.20 | 9   |
| 22 Y55F3AR.3   | MVINHIEK         | 24 | 5079  | 2.43 | 0.21 | 9   |
| 22 Y55F3AR.3   | LFVTNDAATILK     | 14 | 190   | 2.45 | 0.15 | 6   |
| 1 Y55F3AR.3    | MVINHIEK         | 20 | 4535  | 2.45 | 0.08 | 3   |
| 10 Y55F3AR.3   | GTVLIENADELRNFSK | 26 | 2306  | 2.63 | 0.15 | 6   |
| 10 Y55F3AR.3   | MVINHIEK         | 26 | 4307  | 2.69 | 0.09 | 3   |
| 10 Y55F3AR.3   | FAHALETLPK       | 18 | 2754  | 2.70 | 0.11 | 4   |
| 10 Y55F3AR.3   | MVINHIEK         | 22 | 8043  | 3.31 | 0.05 | 2   |
| 10 Y55F3AR.3   | FAHALETLPK       | 33 | 5852  | 3.72 | 0.13 | 3   |
| 10 Y55F3AR.3   | MVINHIEK         | 21 | 6973  | 3.78 | 0.09 | 2   |
| 10 Y55F3AR.3   | GTVLIENADELRNFSK | 33 | 1273  | 4.74 | 0.19 | 4   |
| 1 Y55F3BR.6    | RRFPLPK          | 19 | 1958  | 3.70 | 0.12 | 3   |
| 22 Y57A10A.23  | HFGVDIPEAK       | 28 | 8394  | 0.51 | 0.12 | 24  |
| 22 Y57A10C.6   | EFSLDQVINARK     | 16 | 1302  | 0.42 | 0.26 | 62  |
| 7 Y57A10C.6    | AQAVEIVGLK       | 40 | 2504  | 0.46 | 0.09 | 20  |
| 22 Y57A10C.6   | AQAVEIVGLK       | 23 | 3427  | 0.48 | 0.17 | 36  |
| 1 Y57A10C.6    | AQAVEIVGLK       | 46 | 1603  | 0.48 | 0.12 | 25  |
| 10 Y57A10C.6   | AQAVEIVGLK       | 67 | 4896  | 0.59 | 0.10 | 17  |
| 10 Y57A10C.6   | EFSLDQVINARK     | 14 | 1455  | 0.59 | 0.10 | 16  |
| 10 Y57A10C.6   | AQAVEIVGLK       | 46 | 5995  | 0.60 | 0.06 | 10  |
| 22 Y57A10C.6   | EFSLDQVINARK     | 15 | 1962  | 0.64 | 0.11 | 17  |
| 7 Y57A10C.6    | AQAVEIVGLK       | 49 | 2752  | 0.64 | 0.21 | 34  |
| 10 Y57A10C.6   | AQAVEIVGLK       | 55 | 5916  | 0.64 | 0.11 | 18  |
| 1 Y57A10C.6    | AQAVEIVGLK       | 17 | 587   | 0.71 | 0.13 | 18  |
| 22 Y57A10C.6   | AQAVEIVGLK       | 46 | 2112  | 0.73 | 0.12 | 17  |
| 1 Y57A10C.6    | AQAVEIVGLK       | 52 | 1561  | 0.75 | 0.20 | 27  |
| 10 Y57A10C.6   | EFSLDQVINARK     | 15 | 1440  | 0.78 | 0.07 | 8   |
| 1 Y57A10C.6    | AQAVEIVGLK       | 25 | 625   | 0.79 | 0.16 | 21  |
| 1 Y57A10C.6    | AQAVEIVGLK       | 33 | 1739  | 0.80 | 0.11 | 14  |
| 10 Y57A10C.6   | EFSLDQVINARK     | 25 | 2017  | 0.80 | 0.18 | 22  |
| 10 Y57A10C.6   | AQAVEIVGLK       | 57 | 4569  | 0.82 | 0.07 | 9   |
| 22 Y57A10C.6   | AQAVEIVGLK       | 51 | 3774  | 0.85 | 0.08 | 10  |
| 10 Y57A10C.6   | AQAVEIVGLK       | 57 | 3387  | 0.93 | 0.12 | 13  |
| 1 Y57A10C.6    | AQAVEIVGLK       | 34 | 1749  | 0.97 | 0.04 | 4   |
| 10 Y57A10C.6   | AQAVEIVGLK       | 49 | 3911  | 0.99 | 0.10 | 10  |
| 1 Y57A10C.6    | AQAVEIVGLK       | 18 | 710   | 1.01 | 0.13 | 13  |
| 10 Y57A10C.6   | AQAVEIVGLK       | 41 | 2808  | 1.03 | 0.15 | 14  |
| 7 Y57A10C.6    | AQAVEIVGLK       | 61 | 2461  | 1.07 | 0.12 | 11  |
| 22 Y57A10C.6   | AQAVEIVGLK       | 41 | 3017  | 1.32 | 0.10 | 7   |
| 10 Y57A10C.6   | AQAVEIVGLK       | 48 | 3366  | 1.52 | 0.15 | 10  |
| 22 Y57A10C.6   | AQAVEIVGLK       | 57 | 4084  | 2.91 | 0.15 | 5   |
| 22 Y57A10C.6   | AQAVEIVGLK       | 58 | 4875  | 2.95 | 0.09 | 3   |
| 7 Y57G11B.5    | SEVLESVADIRK     | 17 | 2044  | 0.63 | 0.16 | 26  |
| 7 Y57G11B.5    | SEVLESVADIRK     | 24 | 2871  | 0.77 | 0.07 | 9   |
| 10 Y57G11B.5   | SEVLESVADIRK     | 34 | 10770 | 1.04 | 0.11 | 11  |
| 22 Y57G11B.5   | SEVLESVADIRK     | 44 | 5298  | 1.24 | 0.08 | 7   |
| 22 Y57G11B.5   | SEVLESVADIRK     | 54 | 8809  | 1.27 | 0.11 | 9   |
| 22 Y57G11B.5   | SRLEMFQDVTK      | 18 | 1377  | 1.46 | 0.12 | 8   |
| 10 Y57G11B.5   | SRLEMFQDVTK      | 12 | 4402  | 1.49 | 0.10 | 6   |
| 7 Y57G11B.5    | SEVLESVADIRK     | 12 | 4238  | 1.53 | 0.08 | 5   |
| 22 Y57G11B.5   | SRLEMFQDVTK      | 14 | 3228  | 1.54 | 0.14 | 9   |
| 1 Y57G11C.10b  | NQPYAPAVEK       | 11 | 1210  | 0.28 | 0.36 | 125 |
| 1 Y57G11C.10b  | DVLNMFERGTTK     | 13 | 2728  | 0.57 | 0.15 | 26  |
| 1 Y57G11C.10b  | DVLNMFERGTTK     | 41 | 3494  | 0.62 | 0.12 | 19  |
| 22 Y57G11C.10b | DVLNMFERGTTK     | 27 | 6479  | 0.68 | 0.15 | 23  |
| 1 Y57G11C.10b  | NQPYAPAVEK       | 17 | 8677  | 0.82 | 0.20 | 24  |

|                            |                 |    |       |       |      |     |
|----------------------------|-----------------|----|-------|-------|------|-----|
| 22 Y57G11C.10b             | NQPYAPAVEK      | 31 | 22536 | 0.89  | 0.09 | 10  |
| 22 Y57G11C.10b             | NQPYAPAVEK      | 11 | 3712  | 0.98  | 0.25 | 26  |
| 22 Y57G11C.10b             | NQPYAPAVEK      | 26 | 20334 | 1.05  | 0.13 | 12  |
| 22 Y57G11C.10b             | NQPYAPAVEK      | 14 | 10080 | 1.09  | 0.14 | 13  |
| 1 Y57G11C.10b              | FLMANGPLVK      | 38 | 2400  | 1.21  | 0.11 | 9   |
| 1 Y57G11C.10b              | FLMANGPLVK      | 54 | 2143  | 1.38  | 0.09 | 7   |
| 22 Y57G11C.10b             | FLMANGPLVK      | 41 | 3032  | 1.50  | 0.17 | 12  |
| 22 Y57G11C.10b             | FLMANGPLVK      | 36 | 1718  | 1.56  | 0.06 | 4   |
| 22 Y57G11C.10b             | FLMANGPLVK      | 28 | 2687  | 1.67  | 0.11 | 7   |
| 22 Y57G11C.10b             | FLMANGPLVK      | 42 | 2968  | 1.71  | 0.14 | 8   |
| 7 Y57G11C.10b;Y57G11C.10a  | SIEASFVVK       | 25 | 1091  | 0.22  | 0.39 | 178 |
| 7 Y57G11C.10b;Y57G11C.10a  | FLMANGPLVK      | 43 | 3149  | 0.26  | 0.38 | 142 |
| 10 Y57G11C.10b;Y57G11C.10a | FLMANGPLVK      | 29 | 2764  | 0.27  | 0.21 | 77  |
| 10 Y57G11C.10b;Y57G11C.10a | NQPYAPAVEK      | 28 | 6929  | 0.29  | 0.55 | 185 |
| 7 Y57G11C.10b;Y57G11C.10a  | NQPYAPAVEK      | 25 | 3056  | 0.30  | 0.63 | 209 |
| 10 Y57G11C.10b;Y57G11C.10a | FLVWVQQFDENK    | 53 | 1310  | 0.38  | 0.22 | 58  |
| 10 Y57G11C.10b;Y57G11C.10a | FLMANGPLVK      | 33 | 2933  | 0.39  | 0.33 | 84  |
| 10 Y57G11C.10b;Y57G11C.10a | NQPYAPAVEK      | 19 | 5060  | 0.41  | 0.23 | 56  |
| 10 Y57G11C.10b;Y57G11C.10a | FLVWVQQFDENK    | 56 | 1278  | 0.42  | 0.09 | 22  |
| 7 Y57G11C.10b;Y57G11C.10a  | NQPYAPAVEK      | 15 | 4325  | 0.50  | 0.41 | 82  |
| 7 Y57G11C.10b;Y57G11C.10a  | FLMANGPLVK      | 44 | 3104  | 0.56  | 0.08 | 14  |
| 7 Y57G11C.10b;Y57G11C.10a  | FLMANGPLVK      | 20 | 1047  | 0.75  | 0.25 | 33  |
| 10 Y57G11C.10b;Y57G11C.10a | FLMANGPLVK      | 42 | 2812  | 0.77  | 0.11 | 14  |
| 10 Y57G11C.10b;Y57G11C.10a | NQPYAPAVEK      | 11 | 11154 | 0.80  | 0.15 | 19  |
| 10 Y57G11C.10b;Y57G11C.10a | FLMANGPLVK      | 28 | 2586  | 0.84  | 0.13 | 15  |
| 7 Y57G11C.10b;Y57G11C.10a  | FLMANGPLVK      | 28 | 2200  | 0.89  | 0.16 | 18  |
| 10 Y57G11C.10b;Y57G11C.10a | SIEASFVVK       | 21 | 2989  | 1.01  | 0.09 | 8   |
| 10 Y57G11C.10b;Y57G11C.10a | SIEASFVVK       | 43 | 3774  | 1.03  | 0.06 | 6   |
| 10 Y57G11C.10b;Y57G11C.10a | NQPYAPAVEK      | 29 | 14033 | 1.07  | 0.13 | 12  |
| 10 Y57G11C.10b;Y57G11C.10a | SIEASFVVK       | 41 | 2514  | 1.07  | 0.07 | 7   |
| 10 Y57G11C.10b;Y57G11C.10a | DVLNMFERGTTK    | 33 | 7216  | 1.14  | 0.13 | 12  |
| 7 Y57G11C.10b;Y57G11C.10a  | NQPYAPAVEK      | 27 | 3568  | 1.15  | 0.06 | 5   |
| 7 Y57G11C.10b;Y57G11C.10a  | SIEASFVVK       | 45 | 5757  | 1.26  | 0.11 | 9   |
| 7 Y57G11C.10b;Y57G11C.10a  | SIEASFVVK       | 13 | 1004  | 1.42  | 0.13 | 9   |
| 7 Y57G11C.10b;Y57G11C.10a  | FLMANGPLVK      | 17 | 1999  | 1.69  | 0.12 | 7   |
| 7 Y57G11C.10b;Y57G11C.10a  | FLMANGPLVK      | 38 | 1809  | 1.85  | 0.24 | 13  |
| 10 Y57G11C.10b;Y57G11C.10a | FLMANGPLVK      | 49 | 5158  | 1.92  | 0.12 | 6   |
| 10 Y57G11C.10b;Y57G11C.10a | FLMANGPLVK      | 38 | 4378  | 2.09  | 0.10 | 5   |
| 10 Y57G11C.10b;Y57G11C.10a | FLMANGPLVK      | 55 | 5014  | 2.13  | 0.10 | 5   |
| 10 Y57G11C.10b;Y57G11C.10a | FLMANGPLVK      | 48 | 3402  | 2.41  | 0.10 | 4   |
| 7 Y57G11C.10b;Y57G11C.10a  | FLMANGPLVK      | 33 | 2026  | 3.56  | 0.31 | 9   |
| 7 Y57G11C.10b;Y57G11C.10a  | SIEASFVVK       | 36 | 1829  | 3.87  | 0.23 | 6   |
| 7 Y57G11C.10b;Y57G11C.10a  | SIEASFVVK       | 35 | 1563  | 5.69  | 0.08 | 1   |
| 7 Y57G11C.10b;Y57G11C.10a  | FLMANGPLVK      | 39 | 2137  | 11.03 | 0.46 | 4   |
| 10 Y57G11C.34              | NVLSALEIHK      | 52 | 1628  | 0.50  | 0.17 | 33  |
| 10 Y57G11C.34              | NVLSALEIHK      | 57 | 1411  | 0.62  | 0.19 | 31  |
| 1 Y57G11C.34               | NVLSALEIHK      | 52 | 542   | 0.67  | 0.16 | 24  |
| 1 Y57G11C.34               | NVLSALEIHK      | 33 | 496   | 0.67  | 0.14 | 20  |
| 10 Y57G11C.34              | NVLSALEIHK      | 27 | 763   | 1.52  | 0.12 | 8   |
| 10 Y57G11C.34              | NVLSALEIHK      | 45 | 810   | 2.37  | 0.10 | 4   |
| 10 Y59A8B.10a              | ILIPSNAVGAIIGK  | 36 | 964   | 1.18  | 0.06 | 5   |
| 10 Y59A8B.10a              | ILIPSNAVGAIIGK  | 29 | 1037  | 1.23  | 0.19 | 15  |
| 10 Y59A8B.10a              | VASDPHHASEINK   | 15 | 3056  | 1.25  | 0.14 | 11  |
| 22 Y59A8B.10a              | ILIPSNAVGAIIGK  | 24 | 820   | 2.28  | 0.32 | 14  |
| 7 Y62H9A.9                 | LYETLRK         | 12 | 3191  | 3.06  | 0.43 | 14  |
| 1 Y63D3A.5                 | QSHHDNIVFQK     | 17 | 1037  | 0.78  | 0.23 | 30  |
| 1 Y63D3A.5                 | QSHHDNIVFQK     | 22 | 5428  | 2.57  | 0.20 | 8   |
| 10 Y63D3A.5                | QSHHDNIVFQK     | 12 | 5878  | 3.22  | 0.19 | 6   |
| 7 Y65B4A.8                 | LGTIVFSDK       | 15 | 1090  | 0.54  | 0.14 | 26  |
| 22 Y65B4A.8                | QLLTSAAAAALSSK  | 66 | 1838  | 0.99  | 0.19 | 20  |
| 10 Y65B4A.8                | QLLTSAAAAALSSK  | 52 | 1600  | 1.04  | 0.20 | 19  |
| 1 Y65B4A.8                 | QLLTSAAAAALSSK  | 50 | 1077  | 1.29  | 0.42 | 32  |
| 10 Y65B4A.8                | QLLTSAAAAALSSK  | 49 | 1496  | 1.71  | 0.23 | 13  |
| 22 Y65B4BL.2               | HPNVYFK         | 17 | 5235  | 3.83  | 0.21 | 6   |
| 1 Y65B4BR.5a;Y65B4BR.5b    | NILFVINKPDVFK   | 25 | 598   | 0.16  | 0.30 | 194 |
| 10 Y65B4BR.5a;Y65B4BR.5b   | NILFVINKPDVFK   | 46 | 3387  | 0.26  | 0.06 | 24  |
| 1 Y65B4BR.5a;Y65B4BR.5b    | DIELVISQANTTRNK | 21 | 1435  | 0.43  | 0.26 | 60  |
| 10 Y65B4BR.5a;Y65B4BR.5b   | NILFVINKPDVFK   | 41 | 4265  | 0.43  | 0.23 | 53  |
| 10 Y65B4BR.5a;Y65B4BR.5b   | NILFVINKPDVFK   | 15 | 2069  | 0.45  | 0.38 | 85  |
| 10 Y65B4BR.5a;Y65B4BR.5b   | DIELVISQANTTRNK | 66 | 4980  | 0.48  | 0.10 | 21  |
| 7 Y65B4BR.5a;Y65B4BR.5b    | DIELVISQANTTRNK | 55 | 5298  | 0.51  | 0.15 | 29  |
| 10 Y65B4BR.5a;Y65B4BR.5b   | DIELVISQANTTRNK | 49 | 5343  | 0.51  | 0.12 | 24  |
| 10 Y65B4BR.5a;Y65B4BR.5b   | NILFVINKPDVFK   | 29 | 7320  | 0.62  | 0.25 | 40  |
| 1 Y65B4BR.5a;Y65B4BR.5b    | DIELVISQANTTRNK | 37 | 2920  | 0.69  | 0.16 | 23  |
| 1 Y65B4BR.5a;Y65B4BR.5b    | DIELVISQANTTRNK | 40 | 2211  | 0.70  | 0.22 | 31  |
| 22 Y65B4BR.5a;Y65B4BR.5b   | SPGSDTYIIFGEAK  | 34 | 5225  | 0.72  | 0.06 | 8   |
| 1 Y65B4BR.5a;Y65B4BR.5b    | SPGSDTYIIFGEAK  | 23 | 1522  | 0.75  | 0.09 | 12  |
| 7 Y65B4BR.5a;Y65B4BR.5b    | DIELVISQANTTRNK | 49 | 4687  | 0.77  | 0.14 | 18  |
| 10 Y65B4BR.5a;Y65B4BR.5b   | SPGSDTYIIFGEAK  | 15 | 2412  | 0.78  | 0.18 | 23  |
| 22 Y65B4BR.5a;Y65B4BR.5b   | SPGSDTYIIFGEAK  | 17 | 3956  | 0.80  | 0.15 | 19  |
| 7 Y65B4BR.5a;Y65B4BR.5b    | SPGSDTYIIFGEAK  | 26 | 6966  | 0.81  | 0.24 | 29  |
| 22 Y65B4BR.5a;Y65B4BR.5b   | DIELVISQANTTRNK | 44 | 12680 | 0.95  | 0.09 | 10  |
| 22 Y65B4BR.5a;Y65B4BR.5b   | NILFVINKPDVFK   | 16 | 2892  | 1.01  | 0.10 | 10  |
| 7 Y65B4BR.5a;Y65B4BR.5b    | SPGSDTYIIFGEAK  | 18 | 9239  | 1.02  | 0.23 | 23  |
| 10 Y65B4BR.5a;Y65B4BR.5b   | QVTGVSRCIRK     | 13 | 22382 | 1.04  | 0.32 | 31  |
| 10 Y65B4BR.5a;Y65B4BR.5b   | SPGSDTYIIFGEAK  | 44 | 5111  | 1.14  | 0.12 | 11  |
| 10 Y65B4BR.5a;Y65B4BR.5b   | DIELVISQANTTRNK | 17 | 8823  | 1.17  | 0.08 | 7   |
| 1 Y65B4BR.5a;Y65B4BR.5b    | SPGSDTYIIFGEAK  | 31 | 4877  | 1.18  | 0.12 | 11  |
| 10 Y65B4BR.5a;Y65B4BR.5b   | DIELVISQANTTRNK | 60 | 10711 | 1.19  | 0.08 | 6   |
| 22 Y65B4BR.5a;Y65B4BR.5b   | SPGSDTYIIFGEAK  | 43 | 8146  | 1.22  | 0.11 | 9   |
| 10 Y65B4BR.5a;Y65B4BR.5b   | SPGSDTYIIFGEAK  | 56 | 8143  | 1.25  | 0.19 | 15  |
| 10 Y65B4BR.5a;Y65B4BR.5b   | SPGSDTYIIFGEAK  | 42 | 4796  | 1.29  | 0.11 | 9   |
| 10 Y65B4BR.5a;Y65B4BR.5b   | SPGSDTYIIFGEAK  | 35 | 15429 | 1.29  | 0.07 | 6   |
| 22 Y65B4BR.5a;Y65B4BR.5b   | SPGSDTYIIFGEAK  | 47 | 5606  | 1.30  | 0.07 | 5   |
| 1 Y65B4BR.5a;Y65B4BR.5b    | DIELVISQANTTRNK | 34 | 3546  | 1.35  | 0.14 | 10  |
| 10 Y65B4BR.5a;Y65B4BR.5b   | DIELVISQANTTRNK | 42 | 6451  | 1.36  | 0.10 | 7   |
| 22 Y65B4BR.5a;Y65B4BR.5b   | DIELVISQANTTRNK | 21 | 8487  | 1.36  | 0.11 | 8   |
| 1 Y65B4BR.5a;Y65B4BR.5b    | NILFVINKPDVFK   | 25 | 3327  | 1.37  | 0.40 | 29  |
| 10 Y65B4BR.5a;Y65B4BR.5b   | NILFVINKPDVFK   | 34 | 10996 | 1.42  | 0.58 | 41  |
| 10 Y65B4BR.5a;Y65B4BR.5b   | SPGSDTYIIFGEAK  | 35 | 10369 | 1.44  | 0.14 | 10  |
| 22 Y65B4BR.5a;Y65B4BR.5b   | DIELVISQANTTRNK | 41 | 4391  | 1.52  | 0.09 | 6   |

|                                                      |                   |     |       |       |      |    |
|------------------------------------------------------|-------------------|-----|-------|-------|------|----|
| 1 Y65B4BR.5a;Y65B4BR.5b                              | SPGSDTYIIFGEAK    | 28  | 2830  | 1.54  | 0.11 | 7  |
| 10 Y65B4BR.5a;Y65B4BR.5b                             | SPGSDTYIIFGEAK    | 30  | 6264  | 1.62  | 0.14 | 8  |
| 7 Y65B4BR.5a;Y65B4BR.5b                              | SPGSDTYIIFGEAK    | 21  | 5192  | 1.68  | 0.12 | 7  |
| 22 Y65B4BR.5a;Y65B4BR.5b                             | DIELVISQANTTRNK   | 74  | 3619  | 1.69  | 0.14 | 8  |
| 1 Y65B4BR.5a;Y65B4BR.5b                              | DIELVISQANTTRNK   | 35  | 2707  | 1.88  | 0.13 | 7  |
| 22 Y65B4BR.5a;Y65B4BR.5b                             | DIELVISQANTTRNK   | 11  | 9019  | 2.33  | 0.10 | 4  |
| 7 Y65B4BR.5a;Y65B4BR.5b                              | DIELVISQANTTRNK   | 34  | 2543  | 2.52  | 0.12 | 5  |
| 22 Y65B4BR.5a;Y65B4BR.5b                             | NILFVINKPDVFK     | 14  | 3384  | 2.55  | 0.14 | 5  |
| 22 Y65B4BR.5a;Y65B4BR.5b                             | DIELVISQANTTRNK   | 66  | 6852  | 2.73  | 0.08 | 3  |
| 22 Y65B4BR.5a;Y65B4BR.5b                             | DIELVISQANTTRNK   | 66  | 6453  | 2.95  | 0.06 | 2  |
| 7 Y65B4BR.5a;Y65B4BR.5b                              | SPGSDTYIIFGEAK    | 31  | 10412 | 5.68  | 0.13 | 2  |
| 10 Y65B4BR.5a;Y65B4BR.5b                             | NILFVINKPDVFK     | 61  | 3432  | 24.96 | 0.55 | 2  |
| 10 Y66A7A.6                                          | EIVLYEDASEEDHVLTK | 43  | 1202  | 0.37  | 0.17 | 45 |
| 10 Y66A7A.6                                          | EIVLYEDASEEDHVLTK | 117 | 1896  | 0.66  | 0.13 | 20 |
| 22 Y66A7A.6                                          | MVFGDLTEPMQVK     | 12  | 1577  | 0.75  | 0.39 | 52 |
| 22 Y66A7A.6                                          | SFAFDALSSEK       | 29  | 1460  | 0.82  | 0.12 | 15 |
| 22 Y66A7A.6                                          | SFAFDALSSEK       | 26  | 1190  | 1.02  | 0.15 | 15 |
| 1 Y66A7A.6                                           | SFAFDALSSEK       | 39  | 1996  | 1.10  | 0.09 | 9  |
| 22 Y66A7A.6                                          | SFAFDALSSEK       | 14  | 690   | 1.52  | 0.27 | 18 |
| 22 Y66D12A.9                                         | LSYDRLAEILPDK     | 21  | 2232  | 0.54  | 0.04 | 8  |
| 10 Y66D12A.9                                         | LSYDRLAEILPDK     | 18  | 3361  | 0.60  | 0.15 | 25 |
| 10 Y66D12A.9                                         | VIEFDALLK         | 19  | 490   | 0.60  | 0.32 | 53 |
| 22 Y66D12A.9                                         | LSYDRLAEILPDK     | 29  | 1404  | 0.75  | 0.19 | 25 |
| 10 Y66D12A.9                                         | VIEFDALLK         | 18  | 470   | 0.86  | 0.36 | 42 |
| 22 Y66D12A.9                                         | LSYDRLAEILPDK     | 38  | 2400  | 0.90  | 0.16 | 18 |
| 10 Y66D12A.9                                         | VIEFDALLK         | 25  | 825   | 1.09  | 0.18 | 16 |
| 1 Y66D12A.9                                          | LSYDRLAEILPDK     | 12  | 1222  | 1.13  | 0.12 | 10 |
| 22 Y66D12A.9                                         | LFAEAERLVK        | 48  | 2522  | 1.20  | 0.24 | 20 |
| 7 Y66D12A.9                                          | LSYDRLAEILPDK     | 11  | 1231  | 1.23  | 0.19 | 16 |
| 1 Y66D12A.9                                          | LFAEAERLVK        | 24  | 1405  | 1.32  | 0.10 | 7  |
| 22 Y66D12A.9                                         | VIEFDALLK         | 32  | 717   | 1.68  | 0.21 | 12 |
| 7 Y66D12A.9                                          | LFAEAERLVK        | 41  | 1944  | 1.69  | 0.25 | 15 |
| 22 Y66H1B.2a;Y66H1B.2f;Y66H1B.2c;Y66H1B.2b;Y66H1B.2e | FNDQHIDSPFFK      | 26  | 10806 | 0.38  | 0.14 | 35 |
| 22 Y66H1B.2a;Y66H1B.2f;Y66H1B.2c;Y66H1B.2b;Y66H1B.2e | GFVFIK            | 26  | 2441  | 0.51  | 0.14 | 28 |
| 22 Y66H1B.2a;Y66H1B.2f;Y66H1B.2c;Y66H1B.2b;Y66H1B.2e | VYIAPATGEVRK      | 31  | 11743 | 0.59  | 0.09 | 16 |
| 22 Y66H1B.2a;Y66H1B.2f;Y66H1B.2c;Y66H1B.2b;Y66H1B.2e | YNGIHAPGSPFK      | 32  | 2592  | 0.63  | 0.11 | 18 |
| 22 Y66H1B.2a;Y66H1B.2f;Y66H1B.2c;Y66H1B.2b;Y66H1B.2e | VYIAPATGEVRK      | 27  | 9017  | 0.64  | 0.08 | 13 |
| 22 Y66H1B.2a;Y66H1B.2f;Y66H1B.2c;Y66H1B.2b;Y66H1B.2e | SAGRVIQTIQK       | 16  | 2554  | 0.68  | 0.10 | 14 |
| 22 Y66H1B.2a;Y66H1B.2f;Y66H1B.2c;Y66H1B.2b;Y66H1B.2e | YNGIHAPGSPFK      | 41  | 3068  | 0.72  | 0.15 | 20 |
| 22 Y66H1B.2a;Y66H1B.2f;Y66H1B.2c;Y66H1B.2b;Y66H1B.2e | SAGRVIQTIQK       | 16  | 2578  | 0.74  | 0.14 | 19 |
| 22 Y66H1B.2a;Y66H1B.2f;Y66H1B.2c;Y66H1B.2b;Y66H1B.2e | YNGIHAPGSPFK      | 40  | 9456  | 0.76  | 0.24 | 32 |
| 22 Y66H1B.2a;Y66H1B.2f;Y66H1B.2c;Y66H1B.2b;Y66H1B.2e | VYIAPATGEVRK      | 15  | 1813  | 0.77  | 0.20 | 26 |
| 22 Y66H1B.2a;Y66H1B.2f;Y66H1B.2c;Y66H1B.2b;Y66H1B.2e | SAGRVIQTIQK       | 22  | 2737  | 0.88  | 0.05 | 6  |
| 22 Y66H1B.2a;Y66H1B.2f;Y66H1B.2c;Y66H1B.2b;Y66H1B.2e | SAGRVIQTIQK       | 16  | 1094  | 0.89  | 0.25 | 28 |
| 22 Y66H1B.2a;Y66H1B.2f;Y66H1B.2c;Y66H1B.2b;Y66H1B.2e | SAGRVIQTIQK       | 15  | 2432  | 1.00  | 0.14 | 14 |
| 22 Y66H1B.2a;Y66H1B.2f;Y66H1B.2c;Y66H1B.2b;Y66H1B.2e | SAGRVIQTIQK       | 32  | 3753  | 1.01  | 0.07 | 7  |
| 22 Y66H1B.2a;Y66H1B.2f;Y66H1B.2c;Y66H1B.2b;Y66H1B.2e | SAGRVIQTIQK       | 10  | 2735  | 1.23  | 0.15 | 12 |
| 22 Y66H1B.2a;Y66H1B.2f;Y66H1B.2c;Y66H1B.2b;Y66H1B.2e | SAGRVIQTIQK       | 12  | 1083  | 1.34  | 0.13 | 10 |
| 22 Y66H1B.2a;Y66H1B.2f;Y66H1B.2c;Y66H1B.2b;Y66H1B.2e | ATLDAYELEK        | 28  | 835   | 1.72  | 0.20 | 12 |
| 10 Y66H1B.2a;Y66H1B.2f;Y66H1B.2g;Y66H1B.2b;Y66H1B.2e | SAGRVIQTIQK       | 19  | 2914  | 1.32  | 0.12 | 9  |
| 10 Y66H1B.2a;Y66H1B.2f;Y66H1B.2g;Y66H1B.2b;Y66H1B.2e | SAGRVIQTIQK       | 23  | 3396  | 1.35  | 0.12 | 9  |
| 10 Y66H1B.2a;Y66H1B.2f;Y66H1B.2g;Y66H1B.2b;Y66H1B.2e | SAGRVIQTIQK       | 23  | 3631  | 1.58  | 0.10 | 7  |
| 10 Y66H1B.2a;Y66H1B.2f;Y66H1B.2g;Y66H1B.2b;Y66H1B.2e | SAGRVIQTIQK       | 30  | 4042  | 1.66  | 0.14 | 9  |
| 7 Y66H1B.2a;Y66H1B.2g;Y66H1B.2c;Y66H1B.2b;Y66H1B.2e  | YNGIHAPGSPFK      | 19  | 3554  | 0.60  | 0.25 | 41 |
| 7 Y66H1B.2a;Y66H1B.2g;Y66H1B.2c;Y66H1B.2b;Y66H1B.2e  | SAGRVIQTIQK       | 24  | 1749  | 0.73  | 0.18 | 24 |
| 7 Y66H1B.2a;Y66H1B.2g;Y66H1B.2c;Y66H1B.2b;Y66H1B.2e  | SAGRVIQTIQK       | 21  | 2505  | 0.79  | 0.12 | 15 |
| 7 Y66H1B.2a;Y66H1B.2g;Y66H1B.2c;Y66H1B.2b;Y66H1B.2e  | YNGIHAPGSPFK      | 21  | 3402  | 0.82  | 0.13 | 16 |
| 7 Y66H1B.2a;Y66H1B.2g;Y66H1B.2c;Y66H1B.2b;Y66H1B.2e  | YNGIHAPGSPFK      | 42  | 4046  | 0.86  | 0.15 | 17 |
| 7 Y66H1B.2a;Y66H1B.2g;Y66H1B.2c;Y66H1B.2b;Y66H1B.2e  | SAGRVIQTIQK       | 17  | 2078  | 0.88  | 0.11 | 12 |
| 7 Y66H1B.2a;Y66H1B.2g;Y66H1B.2c;Y66H1B.2b;Y66H1B.2e  | SAGRVIQTIQK       | 26  | 2910  | 1.03  | 0.12 | 12 |
| 7 Y66H1B.2a;Y66H1B.2g;Y66H1B.2c;Y66H1B.2b;Y66H1B.2e  | SAGRVIQTIQK       | 15  | 1669  | 1.10  | 0.14 | 13 |
| 7 Y66H1B.2a;Y66H1B.2g;Y66H1B.2c;Y66H1B.2b;Y66H1B.2e  | SAGRVIQTIQK       | 22  | 3088  | 1.15  | 0.15 | 13 |
| 7 Y66H1B.2a;Y66H1B.2g;Y66H1B.2c;Y66H1B.2b;Y66H1B.2e  | SAGRVIQTIQK       | 15  | 2110  | 1.20  | 0.05 | 4  |
| 1 Y66H1B.2a;Y66H1B.2g;Y66H1B.2f;Y66H1B.2c            | YNGIHAPGSPFK      | 28  | 3066  | 0.76  | 0.21 | 28 |
| 1 Y66H1B.2a;Y66H1B.2g;Y66H1B.2f;Y66H1B.2c            | SAGRVIQTIQK       | 13  | 1978  | 0.76  | 0.11 | 15 |
| 1 Y66H1B.2a;Y66H1B.2g;Y66H1B.2f;Y66H1B.2c            | YNGIHAPGSPFK      | 12  | 2295  | 0.86  | 0.04 | 5  |
| 1 Y66H1B.2a;Y66H1B.2g;Y66H1B.2f;Y66H1B.2c            | SAGRVIQTIQK       | 29  | 2066  | 0.93  | 0.15 | 17 |
| 1 Y66H1B.2a;Y66H1B.2g;Y66H1B.2f;Y66H1B.2c            | SAGRVIQTIQK       | 25  | 1900  | 1.09  | 0.09 | 9  |
| 1 Y66H1B.2a;Y66H1B.2g;Y66H1B.2f;Y66H1B.2c            | SAGRVIQTIQK       | 20  | 1790  | 1.22  | 0.18 | 15 |
| 1 Y66H1B.2a;Y66H1B.2g;Y66H1B.2f;Y66H1B.2c            | SAGRVIQTIQK       | 17  | 1890  | 1.29  | 0.11 | 9  |
| 10 Y67D8C.5                                          | LARMNGSLILPMIK    | 12  | 6396  | 3.26  | 0.17 | 5  |
| 1 Y69A2AR.18b;Y69A2AR.18a                            | LQILPLEAIK        | 40  | 1680  | 0.30  | 0.15 | 50 |
| 1 Y69A2AR.18b;Y69A2AR.18a                            | LQILPLEAIK        | 14  | 394   | 0.31  | 0.19 | 61 |
| 1 Y69A2AR.18b;Y69A2AR.18a                            | LQILPLEAIK        | 21  | 481   | 0.35  | 0.06 | 18 |
| 1 Y69A2AR.18b;Y69A2AR.18a                            | LQILPLEAIK        | 40  | 1972  | 0.40  | 0.16 | 40 |
| 1 Y69A2AR.18b;Y69A2AR.18a                            | LQILPLEAIK        | 30  | 409   | 0.42  | 0.14 | 34 |
| 1 Y69A2AR.18b;Y69A2AR.18a                            | TFFDNIDPVVEGVEK   | 22  | 1091  | 0.44  | 0.14 | 32 |
| 1 Y69A2AR.18b;Y69A2AR.18a                            | LQILPLEAIK        | 16  | 433   | 0.48  | 0.18 | 38 |
| 1 Y69A2AR.18b;Y69A2AR.18a                            | EIRVVAIGDK        | 20  | 9645  | 0.61  | 0.17 | 28 |
| 1 Y69A2AR.18b;Y69A2AR.18a                            | TFFDNIDPVVEGVEK   | 39  | 1330  | 0.61  | 0.12 | 20 |
| 1 Y69A2AR.18b;Y69A2AR.18a                            | EIRVVAIGDK        | 19  | 8181  | 0.70  | 0.23 | 33 |
| 7 Y69A2AR.18b;Y69A2AR.18a                            | LQILPLEAIK        | 36  | 1449  | 0.92  | 0.22 | 24 |
| 1 Y69A2AR.18b;Y69A2AR.18a                            | GARAYGVGAK        | 48  | 3720  | 0.95  | 0.09 | 9  |
| 1 Y69A2AR.18b;Y69A2AR.18a                            | GARAYGVGAK        | 41  | 5272  | 0.97  | 0.10 | 11 |
| 1 Y69A2AR.18b;Y69A2AR.18a                            | LQILPLEAIK        | 24  | 567   | 2.05  | 0.03 | 1  |
| 22 Y69A2AR.18b;Y69A2AR.18a;Y69A2AR.18c               | LQILPLEAIK        | 32  | 639   | 0.67  | 0.23 | 34 |
| 22 Y69A2AR.18b;Y69A2AR.18a;Y69A2AR.18c               | LQILPLEAIK        | 16  | 703   | 1.08  | 0.12 | 11 |
| 22 Y69A2AR.18b;Y69A2AR.18a;Y69A2AR.18c               | EIRVVAIGDK        | 16  | 4019  | 1.08  | 0.05 | 5  |
| 22 Y69A2AR.18b;Y69A2AR.18a;Y69A2AR.18c               | EIRVVAIGDK        | 12  | 6845  | 2.13  | 0.15 | 7  |
| 22 Y69A2AR.18b;Y69A2AR.18a;Y69A2AR.18c               | LQILPLEAIK        | 22  | 1712  | 2.77  | 0.12 | 4  |
| 22 Y69A2AR.18b;Y69A2AR.18a;Y69A2AR.18c               | GARAYGVGAK        | 41  | 3298  | 2.87  | 0.12 | 4  |
| 22 Y69A2AR.18b;Y69A2AR.18a;Y69A2AR.18c               | GARAYGVGAK        | 51  | 4537  | 3.14  | 0.10 | 3  |
| 7 Y69F12A.2a;Y69F12A.2b                              | NVKPVTLELGGK      | 14  | 2517  | 0.62  | 0.16 | 25 |
| 1 Y69F12A.2a;Y69F12A.2b                              | ATADIVDQYVK       | 13  | 1394  | 0.69  | 0.11 | 15 |
| 1 Y69F12A.2a;Y69F12A.2b                              | NVKPVTLELGGK      | 24  | 4483  | 0.70  | 0.10 | 14 |
| 7 Y69F12A.2a;Y69F12A.2b                              | NVKPVTLELGGK      | 32  | 3022  | 0.72  | 0.23 | 32 |
| 10 Y69F12A.2a;Y69F12A.2b                             | GLASFTEAIVQEANDK  | 74  | 1321  | 1.12  | 0.13 | 11 |
| 22 Y69F12A.2a;Y69F12A.2b                             | NVKPVTLELGGK      | 21  | 2128  | 1.14  | 0.19 | 16 |
| 22 Y69F12A.2a;Y69F12A.2b                             | NVKPVTLELGGK      | 37  | 3533  | 1.45  | 0.21 | 14 |
| 10 Y69F12A.2a;Y69F12A.2b                             | SEIIIFDDSDVK      | 14  | 796   | 2.51  | 0.08 | 3  |
| 1 Y6B3B.3                                            | GLVNLPDVELNVVK    | 19  | 2416  | 2.31  | 1.01 | 44 |

|              |                  |    |        |      |      |    |
|--------------|------------------|----|--------|------|------|----|
| 1 Y71A12B.1  | YLLRQK           | 19 | 7013   | 0.34 | 0.09 | 26 |
| 1 Y71A12B.1  | YLLRQK           | 18 | 6891   | 0.39 | 0.13 | 33 |
| 22 Y71A12B.1 | LRLFFEK          | 28 | 14492  | 0.41 | 0.10 | 25 |
| 10 Y71A12B.1 | LFNLTK           | 25 | 2220   | 0.43 | 0.31 | 72 |
| 7 Y71A12B.1  | LRLFFEK          | 21 | 4843   | 0.45 | 0.13 | 28 |
| 7 Y71A12B.1  | LRLFFEK          | 25 | 3839   | 0.45 | 0.08 | 17 |
| 22 Y71A12B.1 | LFNLTK           | 26 | 3329   | 0.48 | 0.27 | 55 |
| 10 Y71A12B.1 | LFNLTK           | 16 | 2655   | 0.50 | 0.23 | 46 |
| 10 Y71A12B.1 | LFNLTK           | 35 | 6162   | 0.50 | 0.05 | 10 |
| 10 Y71A12B.1 | LFNLTK           | 31 | 3182   | 0.51 | 0.12 | 24 |
| 22 Y71A12B.1 | LRLFFEK          | 26 | 14194  | 0.52 | 0.08 | 16 |
| 10 Y71A12B.1 | YVITHDK          | 41 | 83810  | 0.52 | 0.06 | 12 |
| 10 Y71A12B.1 | YVITHDK          | 32 | 108340 | 0.55 | 0.09 | 16 |
| 7 Y71A12B.1  | YLLRQK           | 20 | 5290   | 0.57 | 0.10 | 18 |
| 10 Y71A12B.1 | YLLRQK           | 20 | 8912   | 0.58 | 0.09 | 16 |
| 7 Y71A12B.1  | YVITHDK          | 27 | 22850  | 0.59 | 0.07 | 12 |
| 10 Y71A12B.1 | QGILTNGRVRLLLK   | 10 | 3726   | 0.60 | 0.22 | 36 |
| 7 Y71A12B.1  | YLLRQK           | 17 | 4366   | 0.61 | 0.15 | 25 |
| 7 Y71A12B.1  | YVITHDK          | 24 | 22012  | 0.62 | 0.07 | 12 |
| 7 Y71A12B.1  | YVITHDK          | 10 | 4899   | 0.62 | 0.09 | 14 |
| 10 Y71A12B.1 | YLLRQK           | 25 | 5607   | 0.63 | 0.11 | 18 |
| 22 Y71A12B.1 | YVITHDK          | 28 | 84176  | 0.64 | 0.09 | 14 |
| 10 Y71A12B.1 | IQRLLTPARIARK    | 10 | 5471   | 0.66 | 0.05 | 8  |
| 22 Y71A12B.1 | LRLFFEK          | 15 | 23399  | 0.68 | 0.23 | 34 |
| 1 Y71A12B.1  | GYVVRIGGGNDK     | 33 | 6810   | 0.68 | 0.22 | 33 |
| 1 Y71A12B.1  | YVITHDK          | 30 | 60287  | 0.68 | 0.10 | 14 |
| 10 Y71A12B.1 | GYVVRIGGGNDK     | 50 | 9913   | 0.69 | 0.10 | 14 |
| 7 Y71A12B.1  | YVITHDK          | 19 | 3895   | 0.70 | 0.09 | 12 |
| 10 Y71A12B.1 | TFPDGVTK         | 33 | 58692  | 0.70 | 0.21 | 30 |
| 22 Y71A12B.1 | YVITHDK          | 31 | 99074  | 0.71 | 0.08 | 11 |
| 22 Y71A12B.1 | YLLRQK           | 18 | 13225  | 0.71 | 0.07 | 9  |
| 10 Y71A12B.1 | TFPDGVTK         | 17 | 34891  | 0.71 | 0.12 | 17 |
| 7 Y71A12B.1  | TFPDGVTK         | 22 | 10194  | 0.72 | 0.17 | 24 |
| 7 Y71A12B.1  | MRLNFAYPATGLQK   | 26 | 4944   | 0.73 | 0.07 | 9  |
| 1 Y71A12B.1  | YLLRQK           | 15 | 5576   | 0.74 | 0.13 | 18 |
| 22 Y71A12B.1 | LRLFFEK          | 24 | 27030  | 0.74 | 0.10 | 14 |
| 1 Y71A12B.1  | RMSQEVAIDALGDEWK | 39 | 8434   | 0.75 | 0.09 | 12 |
| 7 Y71A12B.1  | IQRLLTPARIARK    | 11 | 2288   | 0.76 | 0.13 | 17 |
| 10 Y71A12B.1 | RMSQEVAIDALGDEWK | 29 | 3321   | 0.76 | 0.08 | 11 |
| 22 Y71A12B.1 | YLLRQK           | 18 | 6337   | 0.77 | 0.08 | 10 |
| 7 Y71A12B.1  | LFNLTK           | 20 | 3558   | 0.78 | 0.10 | 13 |
| 1 Y71A12B.1  | GYVVRIGGGNDK     | 39 | 9006   | 0.80 | 0.08 | 11 |
| 10 Y71A12B.1 | RMSQEVAIDALGDEWK | 28 | 18384  | 0.80 | 0.19 | 24 |
| 22 Y71A12B.1 | TFPDGVTK         | 24 | 53396  | 0.81 | 0.30 | 37 |
| 1 Y71A12B.1  | RMSQEVAIDALGDEWK | 24 | 3054   | 0.82 | 0.14 | 17 |
| 10 Y71A12B.1 | RMSQEVAIDALGDEWK | 33 | 17371  | 0.83 | 0.19 | 23 |
| 22 Y71A12B.1 | TFPDGVTK         | 20 | 45601  | 0.83 | 0.23 | 28 |
| 22 Y71A12B.1 | MRLNFAYPATGLQK   | 19 | 6349   | 0.83 | 0.08 | 10 |
| 7 Y71A12B.1  | GYVVRIGGGNDK     | 15 | 2505   | 0.83 | 0.43 | 51 |
| 1 Y71A12B.1  | YLLRQK           | 18 | 6353   | 0.83 | 0.11 | 13 |
| 22 Y71A12B.1 | YLLRQK           | 23 | 14382  | 0.84 | 0.10 | 12 |
| 22 Y71A12B.1 | MRLNFAYPATGLQK   | 22 | 7824   | 0.85 | 0.08 | 9  |
| 22 Y71A12B.1 | LFNLTK           | 14 | 3125   | 0.85 | 0.11 | 14 |
| 1 Y71A12B.1  | RMSQEVAIDALGDEWK | 26 | 2647   | 0.85 | 0.07 | 9  |
| 7 Y71A12B.1  | RMSQEVAIDALGDEWK | 17 | 2313   | 0.86 | 0.13 | 15 |
| 22 Y71A12B.1 | YLLRQK           | 19 | 7138   | 0.87 | 0.07 | 8  |
| 7 Y71A12B.1  | RMSQEVAIDALGDEWK | 47 | 1437   | 0.87 | 0.09 | 10 |
| 10 Y71A12B.1 | GYVVRIGGGNDK     | 49 | 22141  | 0.87 | 0.11 | 13 |
| 10 Y71A12B.1 | GYVVRIGGGNDK     | 48 | 10466  | 0.88 | 0.14 | 16 |
| 1 Y71A12B.1  | RMSQEVAIDALGDEWK | 31 | 8710   | 0.89 | 0.17 | 19 |
| 1 Y71A12B.1  | RMSQEVAIDALGDEWK | 25 | 686    | 0.89 | 0.08 | 9  |
| 1 Y71A12B.1  | RMSQEVAIDALGDEWK | 38 | 2334   | 0.91 | 0.14 | 16 |
| 7 Y71A12B.1  | RMSQEVAIDALGDEWK | 33 | 8150   | 0.92 | 0.23 | 25 |
| 10 Y71A12B.1 | RMSQEVAIDALGDEWK | 55 | 3309   | 0.92 | 0.08 | 9  |
| 7 Y71A12B.1  | RMSQEVAIDALGDEWK | 31 | 1466   | 0.92 | 0.15 | 17 |
| 22 Y71A12B.1 | GYVVRIGGGNDK     | 45 | 10990  | 0.94 | 0.06 | 6  |
| 22 Y71A12B.1 | MRLNFAYPATGLQK   | 50 | 2367   | 0.95 | 0.11 | 11 |
| 22 Y71A12B.1 | LRLFFEK          | 13 | 786    | 0.96 | 0.37 | 39 |
| 10 Y71A12B.1 | MRDDAAAYHK       | 11 | 5304   | 0.97 | 0.18 | 18 |
| 22 Y71A12B.1 | GYVVRIGGGNDK     | 43 | 26770  | 0.98 | 0.09 | 9  |
| 22 Y71A12B.1 | LFNLTK           | 13 | 9086   | 0.99 | 0.10 | 11 |
| 7 Y71A12B.1  | RMSQEVAIDALGDEWK | 39 | 15973  | 0.99 | 0.11 | 11 |
| 10 Y71A12B.1 | MRLNFAYPATGLQK   | 14 | 6435   | 1.00 | 0.10 | 10 |
| 7 Y71A12B.1  | YLLRQK           | 15 | 2956   | 1.00 | 0.10 | 10 |
| 22 Y71A12B.1 | RMSQEVAIDALGDEWK | 63 | 4552   | 1.01 | 0.13 | 13 |
| 22 Y71A12B.1 | MRLNFAYPATGLQK   | 41 | 3309   | 1.02 | 0.11 | 11 |
| 10 Y71A12B.1 | RMSQEVAIDALGDEWK | 63 | 3521   | 1.02 | 0.10 | 10 |
| 7 Y71A12B.1  | MRLNFAYPATGLQK   | 39 | 1397   | 1.02 | 0.18 | 17 |
| 22 Y71A12B.1 | LRLFFEK          | 10 | 487    | 1.03 | 0.29 | 28 |
| 1 Y71A12B.1  | MRDDAAAYHK       | 15 | 4522   | 1.03 | 0.09 | 9  |
| 1 Y71A12B.1  | RMSQEVAIDALGDEWK | 34 | 1702   | 1.06 | 0.16 | 15 |
| 22 Y71A12B.1 | MRDDAAAYHK       | 11 | 3606   | 1.08 | 0.23 | 21 |
| 1 Y71A12B.1  | YVITHDK          | 16 | 4473   | 1.12 | 0.05 | 5  |
| 1 Y71A12B.1  | MRLNFAYPATGLQK   | 11 | 2089   | 1.13 | 0.20 | 18 |
| 1 Y71A12B.1  | MRDDAAAYHK       | 27 | 108432 | 1.14 | 0.08 | 7  |
| 22 Y71A12B.1 | GYVVRIGGGNDK     | 57 | 8934   | 1.15 | 0.06 | 5  |
| 10 Y71A12B.1 | GYVVRIGGGNDK     | 36 | 16995  | 1.15 | 0.27 | 23 |
| 22 Y71A12B.1 | RMSQEVAIDALGDEWK | 30 | 3234   | 1.18 | 0.18 | 15 |
| 10 Y71A12B.1 | MRLNFAYPATGLQK   | 37 | 3316   | 1.19 | 0.05 | 5  |
| 7 Y71A12B.1  | MRLNFAYPATGLQK   | 33 | 1507   | 1.20 | 0.25 | 21 |
| 10 Y71A12B.1 | RMSQEVAIDALGDEWK | 80 | 5997   | 1.22 | 0.14 | 11 |
| 10 Y71A12B.1 | RMSQEVAIDALGDEWK | 49 | 5954   | 1.24 | 0.12 | 10 |
| 1 Y71A12B.1  | MRLNFAYPATGLQK   | 16 | 1779   | 1.24 | 0.13 | 11 |
| 7 Y71A12B.1  | GYVVRIGGGNDK     | 34 | 5333   | 1.25 | 0.12 | 9  |
| 1 Y71A12B.1  | MRDDAAAYHK       | 18 | 19477  | 1.27 | 0.09 | 7  |
| 10 Y71A12B.1 | MRLNFAYPATGLQK   | 32 | 1976   | 1.28 | 0.12 | 9  |
| 7 Y71A12B.1  | MRLNFAYPATGLQK   | 47 | 2344   | 1.28 | 0.13 | 10 |
| 22 Y71A12B.1 | YVITHDK          | 20 | 13054  | 1.30 | 0.06 | 5  |
| 10 Y71A12B.1 | RMSQEVAIDALGDEWK | 54 | 4801   | 1.33 | 0.12 | 9  |
| 22 Y71A12B.1 | MRDDAAAYHK       | 15 | 5136   | 1.35 | 0.21 | 16 |
| 7 Y71A12B.1  | MRLNFAYPATGLQK   | 11 | 8002   | 1.36 | 0.13 | 10 |

|                            |                             |     |        |      |      |     |
|----------------------------|-----------------------------|-----|--------|------|------|-----|
| 1 Y71A12B.1                | YVITHDK                     | 18  | 3372   | 1.39 | 0.07 | 5   |
| 22 Y71A12B.1               | MRLNFAYPATGLQK              | 24  | 12519  | 1.43 | 0.21 | 14  |
| 1 Y71A12B.1                | RMSQEVAIDALGDEWK            | 30  | 1375   | 1.43 | 0.30 | 21  |
| 7 Y71A12B.1                | MRDDAAAYHK                  | 12  | 23677  | 1.46 | 0.07 | 5   |
| 1 Y71A12B.1                | MRDDAAAYHK                  | 28  | 136258 | 1.48 | 0.09 | 6   |
| 22 Y71A12B.1               | YLLRQK                      | 17  | 6535   | 1.48 | 0.07 | 4   |
| 22 Y71A12B.1               | MRLNFAYPATGLQK              | 63  | 3908   | 1.49 | 0.14 | 9   |
| 22 Y71A12B.1               | MRDDAAAYHK                  | 11  | 59531  | 1.49 | 0.04 | 3   |
| 22 Y71A12B.1               | MRLNFAYPATGLQK              | 19  | 10950  | 1.50 | 0.11 | 8   |
| 1 Y71A12B.1                | MRLNFAYPATGLQK              | 22  | 1929   | 1.50 | 0.20 | 13  |
| 10 Y71A12B.1               | YVITHDK                     | 13  | 4215   | 1.52 | 0.06 | 4   |
| 7 Y71A12B.1                | MRLNFAYPATGLQK              | 26  | 1270   | 1.53 | 0.19 | 12  |
| 7 Y71A12B.1                | MRLNFAYPATGLQK              | 17  | 5998   | 1.54 | 0.08 | 5   |
| 10 Y71A12B.1               | MRLNFAYPATGLQK              | 13  | 1120   | 1.55 | 0.08 | 5   |
| 22 Y71A12B.1               | YVITHDK                     | 21  | 10568  | 1.55 | 0.03 | 2   |
| 10 Y71A12B.1               | YVITHDK                     | 14  | 16243  | 1.58 | 0.04 | 2   |
| 10 Y71A12B.1               | YVITHDK                     | 14  | 11903  | 1.59 | 0.07 | 4   |
| 7 Y71A12B.1                | MRLNFAYPATGLQK              | 24  | 2334   | 1.60 | 0.15 | 10  |
| 10 Y71A12B.1               | MRDDAAAYHK                  | 13  | 47509  | 1.61 | 0.10 | 6   |
| 22 Y71A12B.1               | YVITHDK                     | 12  | 1847   | 1.63 | 0.12 | 7   |
| 22 Y71A12B.1               | IQLRITPARIARK               | 15  | 3918   | 1.65 | 0.20 | 12  |
| 10 Y71A12B.1               | MRDDAAAYHK                  | 16  | 152275 | 1.68 | 0.13 | 8   |
| 10 Y71A12B.1               | MRDDAAAYHK                  | 23  | 139402 | 1.68 | 0.14 | 8   |
| 22 Y71A12B.1               | YLLRQK                      | 13  | 4313   | 1.70 | 0.10 | 6   |
| 22 Y71A12B.1               | GYVVRIGGGNDK                | 38  | 25704  | 1.73 | 0.24 | 14  |
| 22 Y71A12B.1               | MRDDAAAYHK                  | 11  | 4218   | 1.82 | 0.14 | 8   |
| 7 Y71A12B.1                | MRDDAAAYHK                  | 28  | 17464  | 1.83 | 0.06 | 3   |
| 7 Y71A12B.1                | YVITHDK                     | 18  | 4398   | 1.85 | 0.06 | 3   |
| 22 Y71A12B.1               | MRLNFAYPATGLQK              | 11  | 1266   | 1.89 | 0.19 | 10  |
| 1 Y71A12B.1                | MRLNFAYPATGLQK              | 15  | 1471   | 1.89 | 0.20 | 11  |
| 22 Y71A12B.1               | GYVVRIGGGNDK                | 12  | 1914   | 1.93 | 0.11 | 5   |
| 22 Y71A12B.1               | MRDDAAAYHK                  | 16  | 97133  | 2.01 | 0.09 | 4   |
| 1 Y71A12B.1                | MRLNFAYPATGLQK              | 28  | 2348   | 2.09 | 0.14 | 7   |
| 1 Y71A12B.1                | MRLNFAYPATGLQK              | 13  | 7674   | 2.09 | 0.16 | 8   |
| 10 Y71A12B.1               | YVITHDK                     | 22  | 6389   | 2.11 | 0.06 | 3   |
| 22 Y71A12B.1               | MRDDAAAYHK                  | 27  | 92434  | 2.14 | 0.11 | 5   |
| 7 Y71A12B.1                | MRLNFAYPATGLQK              | 24  | 796    | 2.17 | 0.17 | 8   |
| 22 Y71A12B.1               | LRLFFEK                     | 27  | 4331   | 2.19 | 0.09 | 4   |
| 7 Y71A12B.1                | MRLNFAYPATGLQK              | 14  | 9083   | 2.23 | 0.08 | 4   |
| 10 Y71A12B.1               | MRLNFAYPATGLQK              | 20  | 10241  | 2.24 | 0.17 | 8   |
| 22 Y71A12B.1               | LRLFFEK                     | 16  | 3470   | 2.26 | 0.05 | 2   |
| 10 Y71A12B.1               | MRLNFAYPATGLQK              | 18  | 24143  | 2.28 | 0.14 | 6   |
| 22 Y71A12B.1               | IQLRITPARIARK               | 13  | 5383   | 2.28 | 0.15 | 6   |
| 10 Y71A12B.1               | MRLNFAYPATGLQK              | 18  | 16464  | 2.33 | 0.11 | 5   |
| 10 Y71A12B.1               | MRLNFAYPATGLQK              | 19  | 17030  | 2.43 | 0.10 | 4   |
| 7 Y71A12B.1                | MRLNFAYPATGLQK              | 31  | 17771  | 2.62 | 0.06 | 2   |
| 10 Y71A12B.1               | MRLNFAYPATGLQK              | 13  | 23550  | 2.84 | 0.10 | 4   |
| 10 Y71A12B.1               | MRLNFAYPATGLQK              | 31  | 4232   | 2.85 | 0.13 | 5   |
| 22 Y71A12B.1               | MRLNFAYPATGLQK              | 13  | 12209  | 2.95 | 0.13 | 4   |
| 22 Y71A12B.1               | MRLNFAYPATGLQK              | 17  | 11028  | 2.98 | 0.13 | 4   |
| 10 Y71A12B.1               | IQLRITPARIARK               | 11  | 6532   | 3.10 | 0.20 | 6   |
| 10 Y71A12B.1               | MRLNFAYPATGLQK              | 31  | 1247   | 3.12 | 0.38 | 12  |
| 10 Y71A12B.17              | YVIDLRK                     | 12  | 4263   | 3.67 | 0.57 | 15  |
| 10 Y71D11A.3b;Y71D11A.3a   | ALELLINTVGK                 | 11  | 307    | 2.95 | 0.12 | 4   |
| 22 Y71F9AL.13a;Y71F9AL.13b | FPSVVTHGESLQSK              | 60  | 11105  | 0.22 | 0.36 | 167 |
| 22 Y71F9AL.13a;Y71F9AL.13b | FPSVVTHGESLQSK              | 67  | 14331  | 0.24 | 0.23 | 94  |
| 7 Y71F9AL.13a;Y71F9AL.13b  | SYDAFIASESLIK               | 69  | 2709   | 0.27 | 0.18 | 69  |
| 1 Y71F9AL.13a;Y71F9AL.13b  | VSRESLNEAIAEVLK             | 47  | 2286   | 0.30 | 0.15 | 49  |
| 7 Y71F9AL.13a;Y71F9AL.13b  | VSRESLNEAIAEVLK             | 80  | 2361   | 0.31 | 0.09 | 31  |
| 7 Y71F9AL.13a;Y71F9AL.13b  | VSRESLNEAIAEVLK             | 76  | 2252   | 0.33 | 0.21 | 61  |
| 7 Y71F9AL.13a;Y71F9AL.13b  | SYDAFIASESLIK               | 74  | 3233   | 0.34 | 0.14 | 40  |
| 22 Y71F9AL.13a;Y71F9AL.13b | VSRESLNEAIAEVLK             | 67  | 3890   | 0.34 | 0.35 | 102 |
| 7 Y71F9AL.13a;Y71F9AL.13b  | SYDAFIASESLIK               | 59  | 2407   | 0.38 | 0.13 | 35  |
| 7 Y71F9AL.13a;Y71F9AL.13b  | RFSGSIRLK                   | 29  | 5612   | 0.38 | 0.25 | 64  |
| 1 Y71F9AL.13a;Y71F9AL.13b  | VSRESLNEAIAEVLK             | 82  | 1413   | 0.39 | 0.10 | 26  |
| 22 Y71F9AL.13a;Y71F9AL.13b | NWQNVRSNLNK                 | 33  | 4000   | 0.39 | 0.24 | 62  |
| 7 Y71F9AL.13a;Y71F9AL.13b  | FPSVVTHGESLQSK              | 73  | 8826   | 0.39 | 0.16 | 39  |
| 22 Y71F9AL.13a;Y71F9AL.13b | VSRESLNEAIAEVLK             | 74  | 1943   | 0.40 | 0.09 | 22  |
| 22 Y71F9AL.13a;Y71F9AL.13b | QIPRILGPGLNK                | 37  | 9816   | 0.43 | 0.18 | 42  |
| 22 Y71F9AL.13a;Y71F9AL.13b | SYDAFIASESLIK               | 74  | 4017   | 0.44 | 0.15 | 35  |
| 1 Y71F9AL.13a;Y71F9AL.13b  | VSRESLNEAIAEVLK             | 65  | 1250   | 0.44 | 0.21 | 47  |
| 22 Y71F9AL.13a;Y71F9AL.13b | QIPRILGPGLNK                | 30  | 11002  | 0.46 | 0.19 | 41  |
| 7 Y71F9AL.13a;Y71F9AL.13b  | QIPRILGPGLNK                | 50  | 5496   | 0.46 | 0.18 | 38  |
| 7 Y71F9AL.13a;Y71F9AL.13b  | QIPRILGPGLNK                | 56  | 5828   | 0.46 | 0.20 | 43  |
| 10 Y71F9AL.13a;Y71F9AL.13b | VSRESLNEAIAEVLK             | 76  | 949    | 0.47 | 0.14 | 30  |
| 22 Y71F9AL.13a;Y71F9AL.13b | SYDAFIASESLIK               | 83  | 3688   | 0.47 | 0.17 | 37  |
| 7 Y71F9AL.13a;Y71F9AL.13b  | VSRESLNEAIAEVLK             | 44  | 4161   | 0.47 | 0.32 | 69  |
| 1 Y71F9AL.13a;Y71F9AL.13b  | VSRESLNEAIAEVLK             | 24  | 1121   | 0.51 | 0.39 | 77  |
| 1 Y71F9AL.13a;Y71F9AL.13b  | FPSVVTHGESLQSK              | 52  | 1927   | 0.52 | 0.22 | 43  |
| 22 Y71F9AL.13a;Y71F9AL.13b | NWQNVRSNLNK                 | 37  | 4884   | 0.52 | 0.38 | 73  |
| 1 Y71F9AL.13a;Y71F9AL.13b  | FPSVVTHGESLQSK              | 100 | 14275  | 0.53 | 0.11 | 21  |
| 7 Y71F9AL.13a;Y71F9AL.13b  | RFSGSIRLK                   | 19  | 5100   | 0.54 | 0.23 | 43  |
| 7 Y71F9AL.13a;Y71F9AL.13b  | FPSVVTHGESLQSK              | 60  | 6337   | 0.55 | 0.09 | 17  |
| 1 Y71F9AL.13a;Y71F9AL.13b  | QIPRILGPGLNK                | 29  | 1736   | 0.55 | 0.13 | 23  |
| 1 Y71F9AL.13a;Y71F9AL.13b  | FPSVVTHGESLQSK              | 27  | 1552   | 0.58 | 0.09 | 15  |
| 10 Y71F9AL.13a;Y71F9AL.13b | VSRESLNEAIAEVLK             | 33  | 6236   | 0.59 | 0.13 | 22  |
| 10 Y71F9AL.13a;Y71F9AL.13b | VSRESLNEAIAEVLK             | 54  | 10289  | 0.60 | 0.12 | 20  |
| 22 Y71F9AL.13a;Y71F9AL.13b | VSRESLNEAIAEVLK             | 40  | 2351   | 0.62 | 0.24 | 39  |
| 1 Y71F9AL.13a;Y71F9AL.13b  | SYDAFIASESLIK               | 80  | 2981   | 0.63 | 0.15 | 23  |
| 1 Y71F9AL.13a;Y71F9AL.13b  | SYDAFIASESLIK               | 95  | 5820   | 0.64 | 0.11 | 17  |
| 10 Y71F9AL.13a;Y71F9AL.13b | RFSGSIRLK                   | 21  | 22733  | 0.67 | 0.16 | 24  |
| 1 Y71F9AL.13a;Y71F9AL.13b  | SYDAFIASESLIK               | 102 | 8362   | 0.68 | 0.09 | 13  |
| 10 Y71F9AL.13a;Y71F9AL.13b | VSRESLNEAIAEVLK             | 101 | 6679   | 0.70 | 0.14 | 19  |
| 1 Y71F9AL.13a;Y71F9AL.13b  | FPSVVTHGESLQSK              | 73  | 15052  | 0.72 | 0.12 | 17  |
| 22 Y71F9AL.13a;Y71F9AL.13b | RFSGSIRLK                   | 24  | 7813   | 0.72 | 0.24 | 33  |
| 22 Y71F9AL.13a;Y71F9AL.13b | SYDAFIASESLIK               | 77  | 3921   | 0.75 | 0.11 | 15  |
| 22 Y71F9AL.13a;Y71F9AL.13b | QIPRILGPGLNK                | 36  | 8833   | 0.75 | 0.08 | 10  |
| 10 Y71F9AL.13a;Y71F9AL.13b | SYDAFIASESLIK               | 114 | 38901  | 0.76 | 0.05 | 6   |
| 10 Y71F9AL.13a;Y71F9AL.13b | QIPRILGPGLNK                | 21  | 3495   | 0.77 | 0.11 | 14  |
| 1 Y71F9AL.13a;Y71F9AL.13b  | VCVFGDQHHLDEAAAGDIPSMSADDLK | 33  | 1570   | 0.77 | 0.17 | 22  |
| 10 Y71F9AL.13a;Y71F9AL.13b | VSRESLNEAIAEVLK             | 78  | 5245   | 0.78 | 0.25 | 32  |

|                            |                 |     |        |      |      |    |
|----------------------------|-----------------|-----|--------|------|------|----|
| 22 Y71F9AL.13a;Y71F9AL.13b | SYDAFIASESLIK   | 87  | 5539   | 0.78 | 0.13 | 17 |
| 10 Y71F9AL.13a;Y71F9AL.13b | QIPRILGPGLNK    | 31  | 5461   | 0.78 | 0.10 | 13 |
| 10 Y71F9AL.13a;Y71F9AL.13b | SYDAFIASESLIK   | 97  | 34552  | 0.78 | 0.08 | 10 |
| 22 Y71F9AL.13a;Y71F9AL.13b | QIPRILGPGLNK    | 36  | 6712   | 0.80 | 0.26 | 33 |
| 1 Y71F9AL.13a;Y71F9AL.13b  | SYDAFIASESLIK   | 86  | 2530   | 0.80 | 0.10 | 13 |
| 10 Y71F9AL.13a;Y71F9AL.13b | SYDAFIASESLIK   | 101 | 71121  | 0.81 | 0.06 | 8  |
| 22 Y71F9AL.13a;Y71F9AL.13b | VSRESLNEAIAEVLK | 37  | 2577   | 0.82 | 0.23 | 28 |
| 10 Y71F9AL.13a;Y71F9AL.13b | FPSVVTHGESLQSK  | 83  | 47266  | 0.82 | 0.11 | 13 |
| 1 Y71F9AL.13a;Y71F9AL.13b  | QIPRILGPGLNK    | 32  | 2626   | 0.82 | 0.11 | 13 |
| 1 Y71F9AL.13a;Y71F9AL.13b  | QIPRILGPGLNK    | 18  | 6776   | 0.83 | 0.07 | 8  |
| 10 Y71F9AL.13a;Y71F9AL.13b | RFSGSIRLK       | 11  | 22021  | 0.86 | 0.05 | 6  |
| 10 Y71F9AL.13a;Y71F9AL.13b | SYDAFIASESLIK   | 109 | 78486  | 0.89 | 0.09 | 10 |
| 10 Y71F9AL.13a;Y71F9AL.13b | SYDAFIASESLIK   | 52  | 1662   | 0.90 | 0.16 | 18 |
| 22 Y71F9AL.13a;Y71F9AL.13b | FPSVVTHGESLQSK  | 66  | 8954   | 0.90 | 0.10 | 12 |
| 1 Y71F9AL.13a;Y71F9AL.13b  | NWQNVRSNLNIK    | 22  | 2043   | 0.91 | 0.10 | 11 |
| 22 Y71F9AL.13a;Y71F9AL.13b | RFSGSIRLK       | 17  | 6216   | 0.92 | 0.26 | 28 |
| 1 Y71F9AL.13a;Y71F9AL.13b  | SDEIRATVK       | 12  | 2204   | 0.92 | 0.20 | 21 |
| 22 Y71F9AL.13a;Y71F9AL.13b | SYDAFIASESLIK   | 85  | 23824  | 0.95 | 0.05 | 5  |
| 10 Y71F9AL.13a;Y71F9AL.13b | NWQNVRSNLNIK    | 18  | 3107   | 0.97 | 0.11 | 11 |
| 10 Y71F9AL.13a;Y71F9AL.13b | FPSVVTHGESLQSK  | 98  | 62102  | 0.97 | 0.09 | 9  |
| 22 Y71F9AL.13a;Y71F9AL.13b | VSRESLNEAIAEVLK | 27  | 5259   | 0.98 | 0.12 | 12 |
| 1 Y71F9AL.13a;Y71F9AL.13b  | QIPRILGPGLNK    | 41  | 8063   | 1.00 | 0.19 | 19 |
| 22 Y71F9AL.13a;Y71F9AL.13b | SYDAFIASESLIK   | 88  | 17955  | 1.00 | 0.07 | 7  |
| 10 Y71F9AL.13a;Y71F9AL.13b | FPSVVTHGESLQSK  | 107 | 76977  | 1.00 | 0.08 | 8  |
| 22 Y71F9AL.13a;Y71F9AL.13b | VSRESLNEAIAEVLK | 90  | 5131   | 1.01 | 0.13 | 13 |
| 7 Y71F9AL.13a;Y71F9AL.13b  | QIPRILGPGLNK    | 11  | 2201   | 1.03 | 0.17 | 17 |
| 1 Y71F9AL.13a;Y71F9AL.13b  | QIPRILGPGLNK    | 26  | 2598   | 1.05 | 0.17 | 16 |
| 10 Y71F9AL.13a;Y71F9AL.13b | VSRESLNEAIAEVLK | 75  | 8019   | 1.06 | 0.10 | 9  |
| 22 Y71F9AL.13a;Y71F9AL.13b | HIPRPNMK        | 11  | 1759   | 1.10 | 0.18 | 16 |
| 22 Y71F9AL.13a;Y71F9AL.13b | FPSVVTHGESLQSK  | 102 | 34057  | 1.14 | 0.14 | 12 |
| 10 Y71F9AL.13a;Y71F9AL.13b | VSRESLNEAIAEVLK | 64  | 5972   | 1.16 | 0.08 | 7  |
| 22 Y71F9AL.13a;Y71F9AL.13b | FPSVVTHGESLQSK  | 94  | 24742  | 1.16 | 0.10 | 8  |
| 1 Y71F9AL.13a;Y71F9AL.13b  | SYDAFIASESLIK   | 54  | 1030   | 1.16 | 0.07 | 6  |
| 10 Y71F9AL.13a;Y71F9AL.13b | QIPRILGPGLNK    | 57  | 19952  | 1.16 | 0.14 | 12 |
| 1 Y71F9AL.13a;Y71F9AL.13b  | VSRESLNEAIAEVLK | 57  | 2351   | 1.17 | 0.15 | 13 |
| 22 Y71F9AL.13a;Y71F9AL.13b | HIPRPNMK        | 14  | 2064   | 1.17 | 0.17 | 14 |
| 22 Y71F9AL.13a;Y71F9AL.13b | RFSGSIRLK       | 16  | 37984  | 1.18 | 0.09 | 8  |
| 1 Y71F9AL.13a;Y71F9AL.13b  | QIPRILGPGLNK    | 15  | 2289   | 1.19 | 0.08 | 6  |
| 22 Y71F9AL.13a;Y71F9AL.13b | FPSVVTHGESLQSK  | 79  | 10094  | 1.20 | 0.13 | 11 |
| 10 Y71F9AL.13a;Y71F9AL.13b | FPSVVTHGESLQSK  | 91  | 95815  | 1.20 | 0.07 | 6  |
| 10 Y71F9AL.13a;Y71F9AL.13b | VSRESLNEAIAEVLK | 45  | 14303  | 1.21 | 0.14 | 11 |
| 10 Y71F9AL.13a;Y71F9AL.13b | FPSVVTHGESLQSK  | 14  | 9271   | 1.21 | 0.24 | 20 |
| 22 Y71F9AL.13a;Y71F9AL.13b | FPSVVTHGESLQSK  | 51  | 1885   | 1.23 | 0.07 | 5  |
| 7 Y71F9AL.13a;Y71F9AL.13b  | VSRESLNEAIAEVLK | 34  | 2020   | 1.23 | 0.21 | 17 |
| 10 Y71F9AL.13a;Y71F9AL.13b | VSRESLNEAIAEVLK | 43  | 8120   | 1.24 | 0.15 | 12 |
| 22 Y71F9AL.13a;Y71F9AL.13b | QIPRILGPGLNK    | 47  | 4582   | 1.24 | 0.08 | 7  |
| 1 Y71F9AL.13a;Y71F9AL.13b  | QIPRILGPGLNK    | 42  | 2983   | 1.27 | 0.18 | 14 |
| 22 Y71F9AL.13a;Y71F9AL.13b | QIPRILGPGLNK    | 31  | 6725   | 1.28 | 0.07 | 5  |
| 22 Y71F9AL.13a;Y71F9AL.13b | RFSGSIRLK       | 16  | 4115   | 1.29 | 0.47 | 37 |
| 22 Y71F9AL.13a;Y71F9AL.13b | SYDAFIASESLIK   | 36  | 1287   | 1.31 | 0.10 | 8  |
| 1 Y71F9AL.13a;Y71F9AL.13b  | QIPRILGPGLNK    | 36  | 2968   | 1.31 | 0.11 | 8  |
| 1 Y71F9AL.13a;Y71F9AL.13b  | VSRESLNEAIAEVLK | 31  | 2685   | 1.31 | 0.21 | 16 |
| 10 Y71F9AL.13a;Y71F9AL.13b | QIPRILGPGLNK    | 45  | 21415  | 1.31 | 0.14 | 11 |
| 22 Y71F9AL.13a;Y71F9AL.13b | VSRESLNEAIAEVLK | 96  | 3263   | 1.33 | 0.14 | 10 |
| 22 Y71F9AL.13a;Y71F9AL.13b | RFSGSIRLK       | 13  | 44581  | 1.38 | 0.13 | 10 |
| 22 Y71F9AL.13a;Y71F9AL.13b | VSRESLNEAIAEVLK | 54  | 7740   | 1.40 | 0.15 | 10 |
| 7 Y71F9AL.13a;Y71F9AL.13b  | QIPRILGPGLNK    | 13  | 2882   | 1.40 | 0.22 | 16 |
| 7 Y71F9AL.13a;Y71F9AL.13b  | VSRESLNEAIAEVLK | 26  | 3241   | 1.41 | 0.24 | 17 |
| 10 Y71F9AL.13a;Y71F9AL.13b | HIPRPNMK        | 11  | 146323 | 1.42 | 0.08 | 6  |
| 1 Y71F9AL.13a;Y71F9AL.13b  | SYDAFIASESLIK   | 100 | 1679   | 1.45 | 0.13 | 9  |
| 10 Y71F9AL.13a;Y71F9AL.13b | QIPRILGPGLNK    | 46  | 18605  | 1.46 | 0.09 | 6  |
| 22 Y71F9AL.13a;Y71F9AL.13b | SYDAFIASESLIK   | 41  | 1827   | 1.47 | 0.11 | 7  |
| 10 Y71F9AL.13a;Y71F9AL.13b | SYDAFIASESLIK   | 72  | 3773   | 1.49 | 0.16 | 11 |
| 1 Y71F9AL.13a;Y71F9AL.13b  | VSRESLNEAIAEVLK | 23  | 1807   | 1.49 | 0.26 | 17 |
| 10 Y71F9AL.13a;Y71F9AL.13b | FPSVVTHGESLQSK  | 14  | 9814   | 1.53 | 0.11 | 7  |
| 10 Y71F9AL.13a;Y71F9AL.13b | SYDAFIASESLIK   | 91  | 6207   | 1.54 | 0.10 | 6  |
| 1 Y71F9AL.13a;Y71F9AL.13b  | FPSVVTHGESLQSK  | 35  | 6323   | 1.58 | 0.09 | 6  |
| 10 Y71F9AL.13a;Y71F9AL.13b | QIPRILGPGLNK    | 20  | 18642  | 1.58 | 0.10 | 7  |
| 1 Y71F9AL.13a;Y71F9AL.13b  | VSRESLNEAIAEVLK | 58  | 1522   | 1.60 | 0.15 | 9  |
| 1 Y71F9AL.13a;Y71F9AL.13b  | HIPRPNMK        | 12  | 1243   | 1.60 | 0.12 | 7  |
| 1 Y71F9AL.13a;Y71F9AL.13b  | FPSVVTHGESLQSK  | 52  | 2453   | 1.63 | 0.18 | 11 |
| 1 Y71F9AL.13a;Y71F9AL.13b  | SYDAFIASESLIK   | 71  | 2261   | 1.64 | 0.11 | 7  |
| 10 Y71F9AL.13a;Y71F9AL.13b | SYDAFIASESLIK   | 76  | 4515   | 1.69 | 0.07 | 4  |
| 7 Y71F9AL.13a;Y71F9AL.13b  | VSRESLNEAIAEVLK | 78  | 1212   | 1.73 | 0.13 | 8  |
| 1 Y71F9AL.13a;Y71F9AL.13b  | FPSVVTHGESLQSK  | 61  | 4952   | 1.78 | 0.30 | 17 |
| 10 Y71F9AL.13a;Y71F9AL.13b | NWQNVRSNLNIK    | 32  | 4990   | 1.80 | 0.33 | 19 |
| 7 Y71F9AL.13a;Y71F9AL.13b  | VSRESLNEAIAEVLK | 53  | 1151   | 1.80 | 0.19 | 10 |
| 22 Y71F9AL.13a;Y71F9AL.13b | RFSGSIRLK       | 18  | 1994   | 1.82 | 0.26 | 14 |
| 7 Y71F9AL.13a;Y71F9AL.13b  | QIPRILGPGLNK    | 38  | 14232  | 1.83 | 0.13 | 7  |
| 7 Y71F9AL.13a;Y71F9AL.13b  | FPSVVTHGESLQSK  | 79  | 34356  | 1.86 | 0.14 | 8  |
| 22 Y71F9AL.13a;Y71F9AL.13b | SYDAFIASESLIK   | 86  | 10273  | 1.92 | 0.11 | 6  |
| 10 Y71F9AL.13a;Y71F9AL.13b | SYDAFIASESLIK   | 55  | 3104   | 1.93 | 0.13 | 7  |
| 10 Y71F9AL.13a;Y71F9AL.13b | QIPRILGPGLNK    | 14  | 6367   | 1.98 | 0.13 | 7  |
| 1 Y71F9AL.13a;Y71F9AL.13b  | SYDAFIASESLIK   | 44  | 1680   | 1.99 | 0.11 | 5  |
| 1 Y71F9AL.13a;Y71F9AL.13b  | SYDAFIASESLIK   | 75  | 3550   | 2.02 | 0.12 | 6  |
| 22 Y71F9AL.13a;Y71F9AL.13b | SYDAFIASESLIK   | 95  | 6007   | 2.13 | 0.09 | 4  |
| 1 Y71F9AL.13a;Y71F9AL.13b  | FPSVVTHGESLQSK  | 55  | 3622   | 2.15 | 0.14 | 7  |
| 22 Y71F9AL.13a;Y71F9AL.13b | QIPRILGPGLNK    | 25  | 15121  | 2.17 | 0.16 | 7  |
| 10 Y71F9AL.13a;Y71F9AL.13b | HIPRPNMK        | 10  | 98035  | 2.18 | 0.05 | 2  |
| 10 Y71F9AL.13a;Y71F9AL.13b | QIPRILGPGLNK    | 35  | 7061   | 2.32 | 0.13 | 6  |
| 22 Y71F9AL.13a;Y71F9AL.13b | SDEIRATVK       | 12  | 5547   | 2.35 | 0.09 | 4  |
| 10 Y71F9AL.13a;Y71F9AL.13b | FPSVVTHGESLQSK  | 85  | 21804  | 2.57 | 0.10 | 4  |
| 7 Y71F9AL.13a;Y71F9AL.13b  | FPSVVTHGESLQSK  | 17  | 4094   | 2.63 | 0.17 | 7  |
| 7 Y71F9AL.13a;Y71F9AL.13b  | SYDAFIASESLIK   | 68  | 2703   | 2.64 | 0.17 | 6  |
| 7 Y71F9AL.13a;Y71F9AL.13b  | FPSVVTHGESLQSK  | 17  | 2511   | 2.65 | 0.27 | 10 |
| 7 Y71F9AL.13a;Y71F9AL.13b  | SYDAFIASESLIK   | 79  | 4956   | 2.70 | 0.08 | 3  |
| 10 Y71F9AL.13a;Y71F9AL.13b | HIPRPNMK        | 13  | 5143   | 2.89 | 0.24 | 8  |
| 10 Y71F9AL.13a;Y71F9AL.13b | FPSVVTHGESLQSK  | 91  | 13007  | 2.99 | 0.07 | 2  |
| 22 Y71F9AL.13a;Y71F9AL.13b | SDEIRATVK       | 10  | 4655   | 3.18 | 0.18 | 6  |
| 10 Y71F9AL.13a;Y71F9AL.13b | FPSVVTHGESLQSK  | 74  | 10064  | 3.20 | 0.09 | 3  |
| 22 Y71F9AL.13a;Y71F9AL.13b | RFSGSIRLK       | 19  | 2960   | 3.26 | 0.31 | 10 |

|                            |                       |    |        |      |      |     |
|----------------------------|-----------------------|----|--------|------|------|-----|
| 22 Y71F9AL.13a;Y71F9AL.13b | FPSVVTHGESLQSK        | 90 | 6047   | 3.35 | 0.16 | 5   |
| 7 Y71F9AL.13a;Y71F9AL.13b  | RFSGSIRLK             | 12 | 2337   | 3.40 | 0.19 | 6   |
| 10 Y71F9AL.13a;Y71F9AL.13b | HIPRPNMK              | 15 | 3962   | 3.43 | 0.02 | 1   |
| 10 Y71F9AL.13a;Y71F9AL.13b | FPSVVTHGESLQSK        | 56 | 4160   | 3.48 | 0.11 | 3   |
| 10 Y71F9AL.13a;Y71F9AL.13b | RFSGSIRLK             | 12 | 3493   | 3.71 | 0.21 | 6   |
| 22 Y71F9AL.13a;Y71F9AL.13b | HIPRPNMK              | 11 | 154569 | 3.89 | 0.11 | 3   |
| 22 Y71F9AL.13a;Y71F9AL.13b | HIPRPNMK              | 10 | 3680   | 4.90 | 0.16 | 3   |
| 7 Y71F9AL.13a;Y71F9AL.13b  | FPSVVTHGESLQSK        | 37 | 4737   | 5.31 | 0.20 | 4   |
| 7 Y71F9AL.13a;Y71F9AL.13b  | FPSVVTHGESLQSK        | 74 | 5757   | 5.38 | 0.12 | 2   |
| 22 Y71F9AL.17              | LLHDTIGVVEAAPFK       | 19 | 2008   | 0.94 | 0.20 | 22  |
| 7 Y71F9AL.17               | NHLPVAAFK             | 14 | 17335  | 1.83 | 0.13 | 7   |
| 22 Y71F9AL.17              | NHLPVAAFK             | 11 | 18939  | 2.23 | 0.08 | 4   |
| 22 Y71G12B.6               | TQFLELLK              | 12 | 804    | 0.58 | 0.13 | 23  |
| 22 Y71G12B.6               | TQFLELLK              | 25 | 810    | 0.76 | 0.08 | 10  |
| 22 Y71G12B.6               | TQFLELLK              | 25 | 951    | 0.81 | 0.15 | 19  |
| 22 Y71G12B.6               | ISTQLAEAVLK           | 31 | 1546   | 0.84 | 0.20 | 24  |
| 10 Y71G12B.6               | TQFLELLK              | 29 | 993    | 0.85 | 0.13 | 15  |
| 22 Y71G12B.6               | TVLITGGISK            | 17 | 1345   | 0.86 | 0.16 | 18  |
| 22 Y71G12B.6               | TVLITGGISK            | 29 | 1646   | 0.87 | 0.20 | 23  |
| 22 Y71G12B.6               | TVLITGGISK            | 21 | 2162   | 0.90 | 0.24 | 27  |
| 7 Y71G12B.6                | TVLITGGISK            | 24 | 2224   | 0.99 | 0.08 | 8   |
| 10 Y71G12B.6               | TQFLELLK              | 14 | 594    | 1.00 | 0.11 | 11  |
| 10 Y71G12B.6               | TQFLELLK              | 30 | 1256   | 1.01 | 0.19 | 19  |
| 7 Y71G12B.6                | TVLITGGISK            | 29 | 2227   | 1.05 | 0.16 | 15  |
| 1 Y71G12B.6                | TVLITGGISK            | 25 | 1368   | 1.09 | 0.15 | 14  |
| 1 Y71G12B.6                | TVLITGGISK            | 24 | 1479   | 1.15 | 0.16 | 14  |
| 7 Y71G12B.6                | TVLITGGISK            | 27 | 2195   | 1.18 | 0.16 | 13  |
| 10 Y71G12B.6               | TQFLELLK              | 17 | 926    | 1.39 | 0.15 | 11  |
| 1 Y71G12B.6                | TQFLELLK              | 18 | 419    | 1.53 | 0.24 | 16  |
| 1 Y71G12B.6                | TVLITGGISK            | 35 | 1339   | 1.66 | 0.13 | 8   |
| 22 Y71G12B.6               | TQFLELLK              | 25 | 688    | 4.92 | 0.11 | 2   |
| 10 Y71G12B.6               | TQFLELLK              | 25 | 1125   | 7.78 | 0.41 | 5   |
| 7 Y71H10A.1a               | SAHTATLLGLK           | 27 | 2276   | 0.70 | 0.04 | 6   |
| 7 Y71H10A.1a               | SAHTATLLGLK           | 18 | 396    | 1.06 | 0.28 | 27  |
| 1 Y71H10A.1a;Y71H10A.1b    | SAHTATLLGLK           | 16 | 2483   | 0.86 | 0.14 | 16  |
| 1 Y71H10A.1a;Y71H10A.1b    | SAHTATLLGLK           | 20 | 1350   | 1.01 | 0.22 | 21  |
| 10 Y71H10B.1b;Y71H10B.1a   | EVLYVGDHIFGDVLRSK     | 25 | 2941   | 0.51 | 0.08 | 17  |
| 10 Y71H10B.1b;Y71H10B.1a   | HPHYSMITDK            | 20 | 13139  | 2.35 | 0.13 | 5   |
| 22 Y71H10B.1c              | EVLYVGDHIFGDVLRSK     | 28 | 2124   | 0.60 | 0.23 | 37  |
| 10 Y71H2AM.11              | GPVIAWIAVLK           | 54 | 838    | 0.35 | 0.19 | 55  |
| 10 Y71H2AM.11              | GPVIAWIAVLK           | 38 | 685    | 0.37 | 0.30 | 82  |
| 10 Y71H2AM.11              | GPVIAWIAVLK           | 38 | 670    | 0.43 | 0.17 | 41  |
| 22 Y71H2AM.11              | FSLRIVPHMTPEATDK      | 13 | 4921   | 0.97 | 0.19 | 19  |
| 10 Y71H2AM.23              | LERGILK               | 17 | 2153   | 0.32 | 0.42 | 131 |
| 10 Y71H2AM.23              | FVIPERK               | 22 | 12018  | 0.49 | 0.27 | 55  |
| 10 Y71H2AM.23              | AQLYVLK               | 11 | 577    | 0.54 | 0.11 | 21  |
| 10 Y71H2AM.23              | RLKPDFSNSPK           | 14 | 8282   | 0.56 | 0.24 | 43  |
| 22 Y71H2AM.23              | SVISGLESFRK           | 30 | 12650  | 0.67 | 0.12 | 17  |
| 7 Y71H2AM.23               | FVIPERK               | 12 | 2477   | 0.70 | 0.20 | 29  |
| 7 Y71H2AM.23               | FVIPERK               | 24 | 2833   | 0.73 | 0.13 | 17  |
| 1 Y71H2AM.23               | FVIPERK               | 27 | 17847  | 0.73 | 0.17 | 24  |
| 7 Y71H2AM.23               | FVIPERK               | 24 | 6975   | 0.74 | 0.21 | 29  |
| 22 Y71H2AM.23              | SVISGLESFRK           | 43 | 1736   | 0.79 | 0.14 | 18  |
| 22 Y71H2AM.23              | AQLYVLK               | 15 | 546    | 0.80 | 0.05 | 6   |
| 7 Y71H2AM.23               | SVISGLESFRK           | 24 | 2270   | 0.82 | 0.11 | 14  |
| 7 Y71H2AM.23               | FVIPERK               | 24 | 10659  | 0.84 | 0.15 | 18  |
| 7 Y71H2AM.23               | AQLYVLK               | 14 | 617    | 0.87 | 0.19 | 21  |
| 22 Y71H2AM.23              | SVISGLESFRK           | 49 | 11311  | 0.90 | 0.06 | 7   |
| 22 Y71H2AM.23              | TTLTSAITK             | 17 | 1863   | 0.90 | 0.11 | 12  |
| 7 Y71H2AM.23               | TTLTSAITK             | 16 | 3107   | 0.91 | 0.23 | 26  |
| 22 Y71H2AM.23              | TVDQAEPGDQLGVLLRGLGPK | 19 | 1645   | 0.93 | 0.28 | 31  |
| 22 Y71H2AM.23              | LERGILK               | 13 | 3968   | 0.94 | 0.13 | 13  |
| 1 Y71H2AM.23               | AQLYVLK               | 11 | 1288   | 0.94 | 0.06 | 6   |
| 10 Y71H2AM.23              | SVISGLESFRK           | 33 | 3662   | 0.96 | 0.19 | 20  |
| 1 Y71H2AM.23               | FVIPERK               | 15 | 21582  | 0.97 | 0.16 | 16  |
| 7 Y71H2AM.23               | QLLEVLDNK             | 47 | 2443   | 1.01 | 0.11 | 11  |
| 22 Y71H2AM.23              | SVISGLESFRK           | 38 | 2149   | 1.03 | 0.10 | 10  |
| 7 Y71H2AM.23               | SVISGLESFRK           | 22 | 1746   | 1.04 | 0.20 | 19  |
| 10 Y71H2AM.23              | AQLYVLK               | 13 | 608    | 1.18 | 0.24 | 20  |
| 22 Y71H2AM.23              | SVISGLESFRK           | 14 | 1329   | 1.18 | 0.26 | 22  |
| 22 Y71H2AM.23              | SVISGLESFRK           | 20 | 3029   | 1.23 | 0.15 | 12  |
| 1 Y71H2AM.23               | SVISGLESFRK           | 29 | 11980  | 1.24 | 0.10 | 8   |
| 22 Y71H2AM.23              | SVISGLESFRK           | 14 | 2673   | 1.34 | 0.12 | 9   |
| 1 Y71H2AM.23               | TTLTSAITK             | 26 | 2463   | 1.36 | 0.13 | 10  |
| 1 Y71H2AM.23               | TTLTSAITK             | 39 | 3270   | 1.36 | 0.12 | 9   |
| 1 Y71H2AM.23               | QLLEVLDNK             | 12 | 756    | 1.41 | 0.26 | 18  |
| 7 Y71H2AM.23               | AQLYVLK               | 24 | 830    | 1.45 | 0.12 | 9   |
| 22 Y71H2AM.23              | TVDQAEPGDQLGVLLRGLGPK | 11 | 1843   | 1.46 | 0.16 | 11  |
| 1 Y71H2AM.23               | AQLYVLK               | 21 | 1414   | 1.52 | 0.13 | 8   |
| 1 Y71H2AM.23               | SVISGLESFRK           | 51 | 13313  | 1.57 | 0.11 | 7   |
| 10 Y71H2AM.23              | TTLTSAITK             | 31 | 3494   | 1.64 | 0.12 | 8   |
| 1 Y71H2AM.23               | FVIPERK               | 13 | 3522   | 2.51 | 0.07 | 3   |
| 10 Y71H2AM.23              | FVIPERK               | 23 | 9511   | 2.88 | 0.09 | 3   |
| 22 Y71H2AM.23              | RLKPDFSNSPK           | 15 | 9687   | 6.01 | 0.46 | 8   |
| 1 Y73B3A.11                | NTSIPGLSIVPK          | 26 | 2120   | 0.66 | 0.48 | 73  |
| 7 Y73B3B.1                 | IYALPEDIVEVKPK        | 62 | 2797   | 0.40 | 0.48 | 122 |
| 22 Y73B6BL.24              | WNMENLGK              | 23 | 4802   | 0.69 | 0.20 | 29  |
| 22 Y73B6BL.24              | WNMENLGK              | 20 | 4116   | 0.80 | 0.15 | 18  |
| 10 Y73B6BL.24              | AEYPSWIK              | 17 | 5879   | 0.82 | 0.06 | 8   |
| 7 Y73B6BL.24               | WNMENLGK              | 13 | 3427   | 0.91 | 0.07 | 8   |
| 10 Y73B6BL.24              | WNMENLGK              | 27 | 3425   | 0.94 | 0.16 | 17  |
| 1 Y73B6BL.24               | RQGLGLGK              | 30 | 6159   | 0.97 | 0.04 | 4   |
| 10 Y73B6BL.24              | WNMENLGK              | 25 | 3551   | 1.05 | 0.10 | 9   |
| 10 Y73B6BL.24              | WNMENLGK              | 27 | 3397   | 1.12 | 0.08 | 7   |
| 10 Y73B6BL.24              | WNMENLGK              | 24 | 4450   | 1.15 | 0.19 | 17  |
| 1 Y73B6BL.24               | WNMENLGK              | 21 | 1412   | 1.36 | 0.08 | 6   |
| 22 Y73B6BL.24              | RQGLGLGK              | 35 | 12292  | 1.49 | 0.05 | 3   |
| 7 Y73B6BL.24               | RQGLGLGK              | 23 | 3850   | 1.87 | 0.13 | 7   |
| 10 Y73B6BL.24              | RQGLGLGK              | 30 | 10073  | 2.37 | 0.11 | 4   |
| 7 Y73B6BL.6a;Y73B6BL.6b    | LALAAREQTIK           | 49 | 2575   | 0.82 | 0.19 | 24  |
| 22 Y73B6BL.6a;Y73B6BL.6b   | LALAAREQTIK           | 35 | 1481   | 0.95 | 0.14 | 15  |

|                            |                             |     |       |       |      |     |
|----------------------------|-----------------------------|-----|-------|-------|------|-----|
| 10 Y73F8A.6                | FGAFK                       | 16  | 945   | 0.67  | 0.11 | 16  |
| 10 Y74C9A.3                | HLLMPFFSK                   | 10  | 1065  | 0.96  | 0.07 | 7   |
| 10 Y74C9A.3                | HLLMPFFSK                   | 10  | 3111  | 1.78  | 0.09 | 5   |
| 7 Y76B12C.2                | STLSSGGATTK                 | 13  | 7776  | 6.78  | 0.54 | 8   |
| 10 Y80D3A.1                | LVTDETVEEFVK                | 31  | 1242  | 0.69  | 0.11 | 16  |
| 1 Y80D3A.1                 | LAEIRENYTK                  | 12  | 1213  | 0.84  | 0.26 | 31  |
| 10 Y82E9BR.14b;Y82E9BR.14a | YLQQLIDADLAEHGGK            | 96  | 4078  | 0.37  | 0.24 | 65  |
| 10 Y82E9BR.14b;Y82E9BR.14a | YLQQLIDADLAEHGGK            | 84  | 3490  | 0.39  | 0.20 | 50  |
| 10 Y82E9BR.14b;Y82E9BR.14a | YLQQLIDADLAEHGGK            | 58  | 2094  | 0.44  | 0.05 | 11  |
| 22 Y82E9BR.14b;Y82E9BR.14a | YLQQLIDADLAEHGGK            | 70  | 4783  | 0.45  | 0.17 | 37  |
| 10 Y82E9BR.14b;Y82E9BR.14a | TEDLSGAVATAYGK              | 16  | 1609  | 0.61  | 0.12 | 20  |
| 1 Y82E9BR.14b;Y82E9BR.14a  | TLVDVYIEK                   | 11  | 421   | 0.77  | 0.16 | 21  |
| 10 Y87G2A.16               | TLINATSSTIKPPK              | 12  | 5034  | 86.69 | 0.81 | 1   |
| 10 Y87G2A.5                | EIENITAAIAQLK               | 45  | 957   | 0.35  | 0.25 | 74  |
| 10 Y87G2A.5                | EIENITAAIAQLK               | 61  | 1054  | 0.46  | 0.20 | 44  |
| 10 Y87G2A.5                | SATPTDLWILSR Lak            | 21  | 970   | 0.54  | 0.10 | 18  |
| 22 Y87G2A.5                | EIENITAAIAQLK               | 87  | 1631  | 0.64  | 0.20 | 31  |
| 22 Y87G2A.5                | EIENITAAIAQLK               | 55  | 1438  | 0.68  | 0.26 | 38  |
| 22 Y87G2A.5                | SATPTDLWILSR Lak            | 14  | 894   | 0.69  | 0.15 | 22  |
| 10 Y87G2A.5                | EIENITAAIAQLK               | 54  | 749   | 0.71  | 0.14 | 20  |
| 10 Y87G2A.5                | EIENITAAIAQLK               | 73  | 2632  | 0.73  | 0.11 | 15  |
| 10 Y87G2A.5                | EIENITAAIAQLK               | 80  | 2802  | 0.76  | 0.15 | 19  |
| 10 Y87G2A.5                | EIENITAAIAQLK               | 69  | 1934  | 0.86  | 0.18 | 21  |
| 10 Y87G2A.5                | EIENITAAIAQLK               | 62  | 1159  | 0.95  | 0.16 | 17  |
| 10 Y87G2A.5                | FQVPEAEILLK                 | 11  | 1490  | 0.95  | 0.13 | 14  |
| 1 Y87G2A.5                 | EIENITAAIAQLK               | 47  | 420   | 0.96  | 0.13 | 13  |
| 10 Y87G2A.5                | EIENITAAIAQLK               | 67  | 1819  | 1.07  | 0.16 | 15  |
| 10 Y87G2A.5                | RFDARTAVIEALK               | 14  | 3541  | 1.12  | 0.21 | 19  |
| 22 Y87G2A.5                | FQVPEAEILLK                 | 11  | 1167  | 1.23  | 0.20 | 16  |
| 22 Y87G2A.5                | EIENITAAIAQLK               | 68  | 2004  | 1.24  | 0.15 | 12  |
| 10 Y87G2A.5                | FQVPEAEILLK                 | 10  | 1270  | 1.29  | 0.13 | 10  |
| 10 Y87G2A.5                | GDVIYDQFRK                  | 12  | 1464  | 1.44  | 0.09 | 6   |
| 10 Y87G2A.6                | LAQLIDETTQK                 | 28  | 702   | 0.94  | 0.23 | 25  |
| 10 Y87G2A.8a               | TA AVAEAE LK                | 82  | 27299 | 0.17  | 0.12 | 73  |
| 10 Y87G2A.8a               | TA AVAEAE LK                | 54  | 18985 | 0.17  | 0.26 | 156 |
| 10 Y87G2A.8a               | AVEFGIDEK                   | 33  | 4466  | 0.22  | 0.31 | 139 |
| 7 Y87G2A.8a                | TA AVAEAE LK                | 51  | 16391 | 0.22  | 0.18 | 83  |
| 7 Y87G2A.8a                | AVEFGIDEK                   | 40  | 8989  | 0.29  | 0.20 | 69  |
| 10 Y87G2A.8a               | AVEFGIDEK                   | 36  | 4987  | 0.30  | 0.24 | 80  |
| 7 Y87G2A.8a                | TA AVAEAE LK                | 54  | 15477 | 0.32  | 0.14 | 45  |
| 7 Y87G2A.8a                | AVEFGIDEK                   | 47  | 5877  | 0.35  | 0.41 | 116 |
| 7 Y87G2A.8a                | LLDGAFSVDEHFVNTPLEK         | 34  | 2539  | 0.38  | 0.27 | 72  |
| 1 Y87G2A.8a                | SRGVEESRNAMFSAEK            | 11  | 7420  | 0.40  | 0.37 | 93  |
| 10 Y87G2A.8a               | SSGMSPESIAK                 | 39  | 3487  | 0.42  | 0.12 | 29  |
| 22 Y87G2A.8a               | TA AVAEAE LK                | 60  | 13601 | 0.43  | 0.05 | 12  |
| 10 Y87G2A.8a               | SSGMSPESIAK                 | 46  | 3135  | 0.46  | 0.10 | 22  |
| 1 Y87G2A.8a                | DAQLLELFEK                  | 46  | 506   | 0.47  | 0.13 | 28  |
| 22 Y87G2A.8a               | TA AVAEAE LK                | 67  | 11016 | 0.49  | 0.10 | 20  |
| 10 Y87G2A.8a               | VIQPELASADTVTSHDASTNGLIAFIK | 44  | 7350  | 0.54  | 0.13 | 24  |
| 22 Y87G2A.8a               | NYQIGPNVHFVSNVDGTHVAEVTK    | 67  | 15449 | 0.54  | 0.13 | 24  |
| 10 Y87G2A.8a               | VIQPELASADTVTSHDASTNGLIAFIK | 29  | 5815  | 0.54  | 0.14 | 26  |
| 7 Y87G2A.8a                | NYQIGPNVHFVSNVDGTHVAEVTK    | 57  | 18042 | 0.54  | 0.24 | 45  |
| 7 Y87G2A.8a                | DAQLLELFEK                  | 38  | 1575  | 0.54  | 0.22 | 40  |
| 1 Y87G2A.8a                | DAQLLELFEK                  | 27  | 512   | 0.55  | 0.21 | 38  |
| 22 Y87G2A.8a               | NYQIGPNVHFVSNVDGTHVAEVTK    | 67  | 22358 | 0.58  | 0.14 | 25  |
| 7 Y87G2A.8a                | NYQIGPNVHFVSNVDGTHVAEVTK    | 56  | 10302 | 0.60  | 0.16 | 27  |
| 7 Y87G2A.8a                | DAQLLELFEK                  | 47  | 1689  | 0.63  | 0.16 | 26  |
| 22 Y87G2A.8a               | AVEFGIDEK                   | 43  | 8244  | 0.64  | 0.15 | 23  |
| 22 Y87G2A.8a               | NYQIGPNVHFVSNVDGTHVAEVTK    | 51  | 18887 | 0.64  | 0.11 | 17  |
| 22 Y87G2A.8a               | VIQPELASADTVTSHDASTNGLIAFIK | 18  | 2175  | 0.68  | 0.22 | 32  |
| 22 Y87G2A.8a               | NYQIGPNVHFVSNVDGTHVAEVTK    | 39  | 11244 | 0.71  | 0.15 | 21  |
| 7 Y87G2A.8a                | SSGMSPESIAK                 | 34  | 3163  | 0.77  | 0.19 | 24  |
| 1 Y87G2A.8a                | HFVALSTNVTK                 | 45  | 6080  | 0.77  | 0.10 | 13  |
| 7 Y87G2A.8a                | SSGMSPESIAK                 | 43  | 2116  | 0.79  | 0.13 | 16  |
| 10 Y87G2A.8a               | SSGMSPESIAK                 | 21  | 10831 | 0.80  | 0.11 | 14  |
| 10 Y87G2A.8a               | NYQIGPNVHFVSNVDGTHVAEVTK    | 47  | 14163 | 0.80  | 0.10 | 13  |
| 7 Y87G2A.8a                | HFVALSTNVTK                 | 50  | 16218 | 0.80  | 0.11 | 14  |
| 10 Y87G2A.8a               | TA AVAEAE LK                | 67  | 11988 | 0.82  | 0.07 | 9   |
| 10 Y87G2A.8a               | SSGMSPESIAK                 | 28  | 8972  | 0.82  | 0.09 | 11  |
| 22 Y87G2A.8a               | DAQLLELFEK                  | 93  | 2144  | 0.84  | 0.13 | 16  |
| 7 Y87G2A.8a                | TA AVAEAE LK                | 71  | 11602 | 0.84  | 0.09 | 11  |
| 22 Y87G2A.8a               | HFVALSTNVTK                 | 33  | 2633  | 0.84  | 0.16 | 19  |
| 22 Y87G2A.8a               | HFVALSTNVTK                 | 58  | 22165 | 0.85  | 0.10 | 12  |
| 22 Y87G2A.8a               | LLDGAFSVDEHFVNTPLEK         | 28  | 2705  | 0.86  | 0.12 | 14  |
| 7 Y87G2A.8a                | HFVALSTNVTK                 | 23  | 1807  | 0.87  | 0.13 | 16  |
| 7 Y87G2A.8a                | HFVALSTNVTK                 | 11  | 1837  | 0.88  | 0.17 | 19  |
| 1 Y87G2A.8a                | HFVALSTNVTK                 | 49  | 8065  | 0.88  | 0.05 | 6   |
| 7 Y87G2A.8a                | HFVALSTNVTK                 | 31  | 3748  | 0.91  | 0.13 | 14  |
| 7 Y87G2A.8a                | HFVALSTNVTK                 | 34  | 15315 | 0.93  | 0.07 | 7   |
| 10 Y87G2A.8a               | NYQIGPNVHFVSNVDGTHVAEVTK    | 44  | 19450 | 0.94  | 0.10 | 10  |
| 22 Y87G2A.8a               | HFVALSTNVTK                 | 51  | 14728 | 0.94  | 0.07 | 7   |
| 22 Y87G2A.8a               | SSGMSPESIAK                 | 38  | 2584  | 0.95  | 0.10 | 11  |
| 22 Y87G2A.8a               | AVEFGIDEK                   | 35  | 4172  | 0.95  | 0.11 | 11  |
| 7 Y87G2A.8a                | TA AVAEAE LK                | 56  | 8699  | 0.96  | 0.12 | 12  |
| 7 Y87G2A.8a                | VIQPELASADTVTSHDASTNGLIAFIK | 32  | 1312  | 0.97  | 0.35 | 36  |
| 7 Y87G2A.8a                | HFVALSTNVTK                 | 34  | 2839  | 0.99  | 0.09 | 9   |
| 10 Y87G2A.8a               | HFVALSTNVTK                 | 62  | 26351 | 0.99  | 0.09 | 9   |
| 22 Y87G2A.8a               | SSGMSPESIAK                 | 34  | 9857  | 1.00  | 0.09 | 9   |
| 7 Y87G2A.8a                | SSGMSPESIAK                 | 21  | 4581  | 1.00  | 0.23 | 23  |
| 10 Y87G2A.8a               | HFVALSTNVTK                 | 56  | 22019 | 1.00  | 0.08 | 8   |
| 22 Y87G2A.8a               | DAQLLELFEK                  | 53  | 1079  | 1.03  | 0.20 | 20  |
| 10 Y87G2A.8a               | TFTTQETITNAETAK             | 102 | 5724  | 1.05  | 0.09 | 9   |
| 22 Y87G2A.8a               | SSGMSPESIAK                 | 41  | 9542  | 1.06  | 0.13 | 12  |
| 10 Y87G2A.8a               | TFTTQETITNAETAK             | 95  | 5673  | 1.07  | 0.13 | 12  |
| 10 Y87G2A.8a               | TA AVAEAE LK                | 45  | 7181  | 1.08  | 0.09 | 9   |
| 7 Y87G2A.8a                | DAQLLELFEK                  | 62  | 1242  | 1.15  | 0.17 | 15  |
| 7 Y87G2A.8a                | SSGMSPESIAK                 | 17  | 3892  | 1.16  | 0.21 | 18  |
| 7 Y87G2A.8a                | DAQLLELFEK                  | 67  | 1956  | 1.17  | 0.12 | 10  |
| 7 Y87G2A.8a                | TFTTQETITNAETAK             | 113 | 6965  | 1.23  | 0.09 | 7   |
| 22 Y87G2A.8a               | SSGMSPESIAK                 | 50  | 3671  | 1.27  | 0.06 | 5   |
| 7 Y87G2A.8a                | TFTTQETITNAETAK             | 99  | 6629  | 1.29  | 0.13 | 10  |

|                      |                             |     |        |      |      |     |
|----------------------|-----------------------------|-----|--------|------|------|-----|
| 1 Y87G2A.8a          | TFTTQETITNAETAK             | 93  | 3871   | 1.29 | 0.15 | 11  |
| 7 Y87G2A.8a          | VIQPELASADTVTSHDASTNGLIAFIK | 36  | 4976   | 1.30 | 0.28 | 21  |
| 22 Y87G2A.8a         | TFTTQETITNAETAK             | 88  | 6231   | 1.30 | 0.14 | 11  |
| 1 Y87G2A.8a          | DAQLLELF EK                 | 63  | 1402   | 1.30 | 0.15 | 11  |
| 22 Y87G2A.8a         | TFTTQETITNAETAK             | 118 | 5450   | 1.31 | 0.10 | 8   |
| 1 Y87G2A.8a          | DAQLLELF EK                 | 51  | 876    | 1.40 | 0.19 | 13  |
| 1 Y87G2A.8a          | TFTTQETITNAETAK             | 85  | 3805   | 1.46 | 0.08 | 5   |
| 22 Y87G2A.8a         | DAQLLELF EK                 | 70  | 3019   | 1.55 | 0.07 | 4   |
| 7 Y87G2A.8a          | HFVALSTNVTK                 | 53  | 8711   | 1.69 | 0.09 | 5   |
| 22 Y87G2A.8a         | DAQLLELF EK                 | 29  | 735    | 1.69 | 0.16 | 9   |
| 7 Y87G2A.8a          | HFVALSTNVTK                 | 45  | 5518   | 2.04 | 0.08 | 4   |
| 1 Y87G2A.8a          | HFVALSTNVTK                 | 26  | 7480   | 2.28 | 0.14 | 6   |
| 22 Y87G2A.8a         | HFVALSTNVTK                 | 44  | 11719  | 2.35 | 0.09 | 4   |
| 22 Y87G2A.8a         | DAQLLELF EK                 | 90  | 2282   | 2.36 | 0.13 | 5   |
| 22 Y87G2A.8a         | HFVALSTNVTK                 | 50  | 9295   | 2.48 | 0.12 | 5   |
| 10 Y87G2A.8a         | HFVALSTNVTK                 | 23  | 8828   | 2.87 | 0.07 | 3   |
| 10 Y87G2A.8a         | HFVALSTNVTK                 | 32  | 7503   | 2.93 | 0.13 | 4   |
| 1 Y87G2A.8a          | HFVALSTNVTK                 | 30  | 4323   | 2.96 | 0.10 | 3   |
| 22 Y87G2A.8a         | TAAVAEAE LK                 | 46  | 10835  | 3.19 | 0.13 | 4   |
| 22 Y87G2A.8a         | TAAVAEAE LK                 | 35  | 7783   | 3.79 | 0.10 | 3   |
| 10 ZC101.2e;ZC101.2b | LIVTVGEPLQVK                | 11  | 548    | 0.54 | 0.11 | 20  |
| 1 ZC247.1            | LPEHVIPVVIEET EK            | 14  | 1131   | 1.52 | 0.21 | 14  |
| 1 ZC247.1            | LPEHVIPVVIEET EK            | 25  | 925    | 1.80 | 0.22 | 12  |
| 1 ZC247.1            | LPEHVIPVVIEET EK            | 31  | 1008   | 1.95 | 0.14 | 7   |
| 1 ZC247.1            | LPEHVIPVVIEET EK            | 17  | 1114   | 1.98 | 0.22 | 11  |
| 1 ZC247.1            | LPEHVIPVVIEET EK            | 17  | 1158   | 2.61 | 0.10 | 4   |
| 1 ZC247.1            | LPEHVIPVVIEET EK            | 18  | 1075   | 3.25 | 0.18 | 5   |
| 1 ZC247.1            | LPEHVIPVVIEET EK            | 19  | 711    | 3.42 | 0.19 | 6   |
| 7 ZC247.2            | DNREMK                      | 14  | 33240  | 1.21 | 0.03 | 2   |
| 1 ZC373.1            | FTTNAAFVANLQK               | 14  | 308    | 0.39 | 0.07 | 18  |
| 22 ZC373.1           | FTTNAAFVANLQK               | 33  | 1313   | 0.58 | 0.31 | 53  |
| 10 ZC373.1           | FTTNAAFVANLQK               | 39  | 1757   | 0.59 | 0.14 | 24  |
| 22 ZC373.1           | FTTNAAFVANLQK               | 17  | 1183   | 0.60 | 0.14 | 23  |
| 10 ZC373.1           | FTTNAAFVANLQK               | 28  | 1483   | 0.62 | 0.15 | 24  |
| 7 ZC373.1            | LQHIPK                      | 27  | 1563   | 0.75 | 0.11 | 14  |
| 22 ZC373.1           | LQHIPK                      | 33  | 5211   | 0.93 | 0.15 | 16  |
| 22 ZC373.1           | LQHIPK                      | 23  | 5947   | 0.98 | 0.14 | 14  |
| 22 ZC373.1           | LQHIPK                      | 25  | 4440   | 1.06 | 0.09 | 8   |
| 22 ZC373.1           | LQHIPK                      | 24  | 4542   | 1.11 | 0.11 | 10  |
| 1 ZC373.1            | LQHIPK                      | 14  | 1112   | 1.20 | 0.15 | 13  |
| 10 ZC373.1           | LQHIPK                      | 22  | 4333   | 1.61 | 0.10 | 6   |
| 10 ZC373.1           | LQHIPK                      | 22  | 6837   | 1.94 | 0.11 | 6   |
| 10 ZC373.1           | LQHIPK                      | 23  | 4182   | 2.64 | 0.13 | 5   |
| 10 ZC373.1           | SWSHSEVEFNK                 | 11  | 1596   | 2.65 | 0.25 | 9   |
| 10 ZC373.1           | LQHIPK                      | 24  | 3820   | 2.75 | 0.10 | 4   |
| 22 ZC373.4           | IVMTSEK                     | 15  | 685    | 1.07 | 0.13 | 12  |
| 10 ZC395.10          | HTGSSTRVVEITVQK             | 22  | 19322  | 1.79 | 0.16 | 9   |
| 10 ZC395.10          | LHFQGSSK                    | 21  | 12323  | 2.04 | 0.09 | 4   |
| 22 ZC395.10          | LHFQGSSK                    | 12  | 12701  | 2.63 | 0.10 | 4   |
| 7 ZC395.10           | LHFQGSSK                    | 23  | 4917   | 2.80 | 0.12 | 4   |
| 22 ZC416.6           | GSALLFYLEQK                 | 44  | 451    | 2.47 | 0.22 | 9   |
| 10 ZC434.2           | IGVFASVYRK                  | 49  | 38170  | 0.14 | 0.16 | 110 |
| 1 ZC434.2            | IGVFASVYRK                  | 35  | 4320   | 0.18 | 0.10 | 56  |
| 1 ZC434.2            | IGVFASVYRK                  | 30  | 5293   | 0.19 | 0.09 | 45  |
| 10 ZC434.2           | IGVFASVYRK                  | 52  | 29115  | 0.26 | 0.32 | 125 |
| 22 ZC434.2           | IGVFASVYRK                  | 43  | 40338  | 0.31 | 0.19 | 61  |
| 1 ZC434.2            | IGVFASVYRK                  | 16  | 933    | 0.33 | 0.18 | 55  |
| 22 ZC434.2           | IGVFASVYRK                  | 43  | 48463  | 0.33 | 0.12 | 36  |
| 22 ZC434.2           | SAIIIVPVPQLK                | 72  | 9232   | 0.39 | 0.09 | 24  |
| 22 ZC434.2           | SAIIIVPVPQLK                | 61  | 7932   | 0.45 | 0.16 | 37  |
| 10 ZC434.2           | FGGRDILILAK                 | 37  | 26237  | 0.48 | 0.11 | 24  |
| 22 ZC434.2           | VVSEIEK                     | 27  | 8119   | 0.49 | 0.20 | 42  |
| 10 ZC434.2           | ELYIVGVK                    | 83  | 32605  | 0.49 | 0.07 | 15  |
| 7 ZC434.2            | IGVFASVYRK                  | 22  | 5295   | 0.51 | 0.13 | 25  |
| 22 ZC434.2           | IGVFASVYRK                  | 32  | 1992   | 0.52 | 0.12 | 23  |
| 7 ZC434.2            | IGVFASVYRK                  | 53  | 6356   | 0.54 | 0.11 | 20  |
| 10 ZC434.2           | ELYIVGVK                    | 85  | 46643  | 0.56 | 0.07 | 13  |
| 1 ZC434.2            | FGGRDILILAK                 | 13  | 559    | 0.56 | 0.16 | 28  |
| 7 ZC434.2            | FGGRDILILAK                 | 31  | 1804   | 0.58 | 0.18 | 32  |
| 10 ZC434.2           | SAIIIVPVPQLK                | 33  | 3334   | 0.60 | 0.14 | 24  |
| 7 ZC434.2            | ELYIVGVK                    | 75  | 11920  | 0.60 | 0.05 | 8   |
| 10 ZC434.2           | SAIIIVPVPQLK                | 36  | 3121   | 0.61 | 0.12 | 19  |
| 7 ZC434.2            | ELYIVGVK                    | 72  | 13343  | 0.63 | 0.07 | 11  |
| 1 ZC434.2            | FGGRDILILAK                 | 35  | 1885   | 0.63 | 0.11 | 17  |
| 1 ZC434.2            | ELYIVGVK                    | 45  | 1113   | 0.66 | 0.18 | 28  |
| 1 ZC434.2            | FGGRDILILAK                 | 44  | 3002   | 0.67 | 0.08 | 12  |
| 1 ZC434.2            | ELYIVGVK                    | 67  | 26671  | 0.71 | 0.07 | 10  |
| 1 ZC434.2            | ELYIVGVK                    | 63  | 19833  | 0.71 | 0.09 | 12  |
| 22 ZC434.2           | IGVFASVYRK                  | 26  | 2170   | 0.73 | 0.16 | 23  |
| 10 ZC434.2           | IHPALVRELEK                 | 10  | 160946 | 0.73 | 0.13 | 18  |
| 10 ZC434.2           | FGGRDILILAK                 | 29  | 1045   | 0.78 | 0.18 | 23  |
| 10 ZC434.2           | FGGRDILILAK                 | 37  | 17405  | 0.79 | 0.14 | 18  |
| 10 ZC434.2           | IGVFASVYRK                  | 26  | 1852   | 0.80 | 0.11 | 14  |
| 22 ZC434.2           | FGGRDILILAK                 | 52  | 1937   | 0.82 | 0.11 | 13  |
| 10 ZC434.2           | QVSQALIDLETNDDVQSQLK        | 62  | 4106   | 0.84 | 0.13 | 16  |
| 22 ZC434.2           | ELYIVGVK                    | 43  | 3485   | 0.85 | 0.14 | 17  |
| 22 ZC434.2           | ELYIVGVK                    | 70  | 6329   | 0.86 | 0.06 | 7   |
| 10 ZC434.2           | VVSEIEK                     | 25  | 7973   | 0.86 | 0.21 | 24  |
| 10 ZC434.2           | QVSQALIDLETNDDVQSQLK        | 58  | 2123   | 0.87 | 0.24 | 27  |
| 22 ZC434.2           | FGGRDILILAK                 | 36  | 43256  | 0.87 | 0.08 | 9   |
| 22 ZC434.2           | SAIIIVPVPQLK                | 35  | 3813   | 0.87 | 0.08 | 9   |
| 1 ZC434.2            | ELYIVGVK                    | 50  | 1508   | 0.88 | 0.17 | 20  |
| 7 ZC434.2            | FGGRDILILAK                 | 30  | 1524   | 0.89 | 0.14 | 16  |
| 22 ZC434.2           | ELYIVGVK                    | 67  | 7502   | 0.89 | 0.08 | 9   |
| 22 ZC434.2           | FGGRDILILAK                 | 34  | 40847  | 0.91 | 0.09 | 9   |
| 10 ZC434.2           | ELYIVGVK                    | 45  | 2121   | 0.92 | 0.13 | 14  |
| 22 ZC434.2           | FGGRDILILAK                 | 20  | 1644   | 0.93 | 0.14 | 15  |
| 10 ZC434.2           | IHPALVRELEK                 | 15  | 309450 | 0.95 | 0.12 | 12  |
| 22 ZC434.2           | ELYIVGVK                    | 78  | 102025 | 0.97 | 0.06 | 7   |
| 1 ZC434.2            | IHPALVRELEK                 | 19  | 10281  | 0.97 | 0.07 | 7   |
| 10 ZC434.2           | IGVFASVYRK                  | 15  | 1465   | 0.99 | 0.13 | 13  |

|    |         |                       |     |       |      |      |    |
|----|---------|-----------------------|-----|-------|------|------|----|
| 10 | ZC434.2 | QVSQALIDLETNDDVQSQLK  | 60  | 2998  | 1.00 | 0.21 | 21 |
| 22 | ZC434.2 | SAIIIVVPVQLK          | 38  | 2983  | 1.01 | 0.16 | 16 |
| 22 | ZC434.2 | QVSQALIDLETNDDVQSQLK  | 52  | 3727  | 1.05 | 0.14 | 13 |
| 22 | ZC434.2 | ELYIVGVK              | 59  | 2801  | 1.07 | 0.12 | 12 |
| 22 | ZC434.2 | ELYIVGVK              | 45  | 1782  | 1.12 | 0.10 | 9  |
| 7  | ZC434.2 | IHPALVRELEK           | 12  | 4881  | 1.13 | 0.11 | 10 |
| 22 | ZC434.2 | ELYIVGVK              | 73  | 95859 | 1.13 | 0.04 | 3  |
| 7  | ZC434.2 | IHPALVRELEK           | 10  | 6424  | 1.13 | 0.13 | 11 |
| 22 | ZC434.2 | QVSQALIDLETNDDVQSQLK  | 135 | 8071  | 1.14 | 0.12 | 11 |
| 1  | ZC434.2 | FGGRDILILAK           | 36  | 3401  | 1.15 | 0.20 | 18 |
| 1  | ZC434.2 | IHPALVRELEK           | 16  | 7433  | 1.16 | 0.16 | 14 |
| 22 | ZC434.2 | FGGRDILILAK           | 20  | 1180  | 1.21 | 0.16 | 13 |
| 22 | ZC434.2 | ELYIVGVK              | 56  | 2788  | 1.23 | 0.13 | 10 |
| 10 | ZC434.2 | FGGRDILILAK           | 14  | 1498  | 1.24 | 0.13 | 11 |
| 7  | ZC434.2 | FGGRDILILAK           | 35  | 3113  | 1.24 | 0.20 | 16 |
| 10 | ZC434.2 | FGGRDILILAK           | 13  | 1544  | 1.25 | 0.09 | 7  |
| 22 | ZC434.2 | QVSQALIDLETNDDVQSQLK  | 113 | 3127  | 1.28 | 0.19 | 15 |
| 22 | ZC434.2 | QVSQALIDLETNDDVQSQLK  | 158 | 6248  | 1.30 | 0.12 | 9  |
| 7  | ZC434.2 | IHPALVRELEK           | 10  | 7386  | 1.33 | 0.08 | 6  |
| 10 | ZC434.2 | FGGRDILILAK           | 43  | 3990  | 1.35 | 0.16 | 12 |
| 22 | ZC434.2 | IHPALVRELEK           | 12  | 9190  | 1.37 | 0.05 | 4  |
| 7  | ZC434.2 | ELYIVGVK              | 44  | 2459  | 1.38 | 0.06 | 4  |
| 22 | ZC434.2 | FGGRDILILAK           | 17  | 891   | 1.40 | 0.14 | 10 |
| 10 | ZC434.2 | ELYIVGVK              | 37  | 2039  | 1.50 | 0.07 | 5  |
| 1  | ZC434.2 | FGGRDILILAK           | 17  | 2422  | 1.51 | 0.12 | 8  |
| 22 | ZC434.2 | ELYIVGVK              | 36  | 2521  | 1.52 | 0.14 | 10 |
| 10 | ZC434.2 | IGVFASVYRK            | 37  | 5924  | 1.55 | 0.10 | 6  |
| 22 | ZC434.2 | QVSQALIDLETNDDVQSQLK  | 62  | 6247  | 1.58 | 0.13 | 8  |
| 10 | ZC434.2 | FGGRDILILAK           | 43  | 7725  | 1.61 | 0.08 | 5  |
| 10 | ZC434.2 | ELYIVGVK              | 43  | 2133  | 1.61 | 0.07 | 4  |
| 7  | ZC434.2 | ELYIVGVK              | 66  | 16196 | 1.69 | 0.07 | 4  |
| 1  | ZC434.2 | ELYIVGVK              | 58  | 1977  | 1.74 | 0.13 | 8  |
| 7  | ZC434.2 | ELYIVGVK              | 78  | 8779  | 1.76 | 0.05 | 3  |
| 7  | ZC434.2 | SAIIIVVPVQLK          | 28  | 1499  | 1.76 | 0.06 | 3  |
| 22 | ZC434.2 | FGGRDILILAK           | 27  | 6002  | 1.82 | 0.11 | 6  |
| 10 | ZC434.2 | IGVFASVYRK            | 28  | 3243  | 1.92 | 0.11 | 6  |
| 10 | ZC434.2 | ELYIVGVK              | 33  | 658   | 1.95 | 0.17 | 9  |
| 10 | ZC434.2 | IHPALVRELEK           | 14  | 5623  | 1.95 | 0.11 | 6  |
| 10 | ZC434.2 | ELYIVGVK              | 71  | 4494  | 2.09 | 0.09 | 4  |
| 1  | ZC434.2 | IHPALVRELEK           | 22  | 6355  | 2.10 | 0.14 | 7  |
| 22 | ZC434.2 | QVSQALIDLETNDDVQSQLK  | 58  | 3327  | 2.12 | 0.19 | 9  |
| 10 | ZC434.2 | IHPALVRELEK           | 13  | 6990  | 2.12 | 0.12 | 6  |
| 1  | ZC434.2 | ELYIVGVK              | 62  | 2228  | 2.20 | 0.16 | 7  |
| 10 | ZC434.2 | ELYIVGVK              | 66  | 8333  | 2.26 | 0.09 | 4  |
| 7  | ZC434.2 | IHPALVRELEK           | 12  | 4404  | 2.29 | 0.10 | 4  |
| 22 | ZC434.2 | PEIIGK                | 39  | 1289  | 2.33 | 0.09 | 4  |
| 7  | ZC434.2 | SAIIIVVPVQLK          | 38  | 1493  | 2.53 | 0.14 | 5  |
| 1  | ZC434.2 | IHPALVRELEK           | 19  | 9330  | 2.56 | 0.13 | 5  |
| 22 | ZC434.2 | ELYIVGVK              | 75  | 8526  | 2.73 | 0.07 | 3  |
| 22 | ZC434.2 | IHPALVRELEK           | 14  | 10892 | 3.31 | 0.10 | 3  |
| 22 | ZC434.2 | IGVFASVYRK            | 29  | 2631  | 3.46 | 0.11 | 3  |
| 22 | ZC434.2 | ELYIVGVK              | 66  | 5735  | 3.47 | 0.10 | 3  |
| 7  | ZC434.2 | IGVFASVYRK            | 14  | 1411  | 3.49 | 0.10 | 3  |
| 22 | ZC434.2 | IGVFASVYRK            | 25  | 1996  | 3.63 | 0.18 | 5  |
| 22 | ZC434.2 | IHPALVRELEK           | 19  | 7223  | 3.88 | 0.16 | 4  |
| 10 | ZC434.2 | PEIIGK                | 12  | 972   | 5.99 | 0.16 | 3  |
| 10 | ZC434.5 | FVELPGA EK            | 13  | 3895  | 0.45 | 0.14 | 30 |
| 22 | ZC434.5 | SELSGVETPLLLIAPDGHTGK | 25  | 2608  | 0.53 | 0.11 | 21 |
| 10 | ZC434.5 | TIPVVTADYDHIISK       | 47  | 1247  | 0.54 | 0.13 | 23 |
| 10 | ZC434.5 | FVELPGA EK            | 16  | 4706  | 0.54 | 0.17 | 31 |
| 22 | ZC434.5 | SELSGVETPLLLIAPDGHTGK | 17  | 2065  | 0.58 | 0.14 | 24 |
| 7  | ZC434.5 | ENAHFEHVIK            | 15  | 4866  | 0.60 | 0.26 | 43 |
| 1  | ZC434.5 | ENAHFEHVIK            | 13  | 3376  | 0.60 | 0.09 | 15 |
| 10 | ZC434.5 | TIPVVTADYDHIISK       | 22  | 938   | 0.63 | 0.25 | 40 |
| 10 | ZC434.5 | QFINFDSVHYTK          | 76  | 4702  | 0.66 | 0.11 | 17 |
| 1  | ZC434.5 | LLLEQVDAAALK          | 71  | 1403  | 0.66 | 0.12 | 18 |
| 10 | ZC434.5 | QFINFDSVHYTK          | 63  | 5657  | 0.69 | 0.13 | 19 |
| 7  | ZC434.5 | LLLEQVDAAALK          | 89  | 1922  | 0.70 | 0.16 | 23 |
| 1  | ZC434.5 | LLLEQVDAAALK          | 74  | 1589  | 0.71 | 0.11 | 15 |
| 10 | ZC434.5 | LLLEQVDAAALK          | 81  | 4000  | 0.71 | 0.10 | 14 |
| 7  | ZC434.5 | TIPVVTADYDHIISK       | 50  | 3109  | 0.74 | 0.22 | 30 |
| 22 | ZC434.5 | QFINFDSVHYTK          | 65  | 5268  | 0.74 | 0.12 | 16 |
| 10 | ZC434.5 | ENAHFEHVIK            | 15  | 8548  | 0.77 | 0.08 | 10 |
| 7  | ZC434.5 | LLLEQVDAAALK          | 49  | 1511  | 0.83 | 0.19 | 23 |
| 10 | ZC434.5 | LLLEQVDAAALK          | 77  | 3492  | 0.83 | 0.16 | 19 |
| 10 | ZC434.5 | FVELPGA EK            | 16  | 2865  | 0.84 | 0.10 | 12 |
| 22 | ZC434.5 | TIPVVTADYDHIISK       | 32  | 4206  | 0.85 | 0.13 | 15 |
| 10 | ZC434.5 | FVELPGA EK            | 22  | 3308  | 0.86 | 0.15 | 17 |
| 22 | ZC434.5 | QFINFDSVHYTK          | 39  | 2577  | 0.87 | 0.15 | 18 |
| 10 | ZC434.5 | TIPVVTADYDHIISK       | 28  | 4308  | 0.89 | 0.16 | 19 |
| 22 | ZC434.5 | QFINFDSVHYTK          | 77  | 6476  | 0.95 | 0.13 | 14 |
| 10 | ZC434.5 | FVELPGA EK            | 37  | 3144  | 1.01 | 0.09 | 9  |
| 10 | ZC434.5 | GFYIVDQPYNPK          | 10  | 1797  | 1.20 | 0.19 | 16 |
| 22 | ZC434.5 | ENAHFEHVIK            | 13  | 7229  | 1.21 | 0.17 | 14 |
| 10 | ZC434.5 | QFINFDSVHYTK          | 49  | 2995  | 1.25 | 0.11 | 8  |
| 22 | ZC434.5 | GFYIVDQPYNPK          | 52  | 2023  | 1.25 | 0.09 | 7  |
| 10 | ZC434.5 | GFYIVDQPYNPK          | 12  | 2023  | 1.27 | 0.07 | 6  |
| 10 | ZC434.5 | QFINFDSVHYTK          | 36  | 2505  | 1.29 | 0.20 | 15 |
| 10 | ZC434.5 | GFYIVDQPYNPK          | 34  | 2400  | 1.31 | 0.11 | 9  |
| 22 | ZC434.5 | TIPVVTADYDHIISK       | 53  | 3259  | 1.36 | 0.12 | 9  |
| 22 | ZC434.5 | ENAHFEHVIK            | 13  | 6245  | 1.37 | 0.11 | 8  |
| 22 | ZC434.5 | GFYIVDQPYNPK          | 13  | 2009  | 1.49 | 0.05 | 3  |
| 10 | ZC434.5 | GFYIVDQPYNPK          | 40  | 2313  | 1.52 | 0.14 | 10 |
| 22 | ZC434.5 | GFYIVDQPYNPK          | 26  | 4074  | 1.65 | 0.13 | 8  |
| 1  | ZC434.8 | LIADHFLFK             | 26  | 1226  | 0.26 | 0.03 | 10 |
| 22 | ZC434.8 | LIADHFLFK             | 21  | 1229  | 0.36 | 0.16 | 43 |
| 7  | ZC434.8 | SIEEVYTK              | 17  | 4101  | 0.40 | 0.19 | 47 |
| 22 | ZC434.8 | EGIYDISNK             | 25  | 5426  | 0.42 | 0.22 | 52 |
| 10 | ZC434.8 | EGIYDISNK             | 53  | 7456  | 0.45 | 0.25 | 56 |
| 7  | ZC434.8 | EGIYDISNK             | 34  | 5552  | 0.48 | 0.16 | 33 |
| 10 | ZC434.8 | EGIYDISNK             | 51  | 8813  | 0.48 | 0.21 | 44 |

|    |                                                                   |                 |    |       |      |      |    |
|----|-------------------------------------------------------------------|-----------------|----|-------|------|------|----|
| 1  | ZC434.8                                                           | LIADHFLFK       | 16 | 1465  | 0.51 | 0.40 | 78 |
| 7  | ZC434.8                                                           | EGYDISNK        | 44 | 8265  | 0.52 | 0.23 | 44 |
| 7  | ZC434.8                                                           | LIADHFLFK       | 53 | 6773  | 0.59 | 0.32 | 55 |
| 7  | ZC434.8                                                           | LIADHFLFK       | 26 | 4405  | 0.61 | 0.12 | 20 |
| 7  | ZC434.8                                                           | SIEEVYTK        | 15 | 3252  | 0.62 | 0.16 | 26 |
| 22 | ZC434.8                                                           | LIADHFLFK       | 30 | 5151  | 0.65 | 0.26 | 40 |
| 1  | ZC434.8                                                           | LIADHFLFK       | 31 | 1524  | 0.67 | 0.13 | 20 |
| 22 | ZC434.8                                                           | EGYDISNK        | 20 | 4410  | 0.71 | 0.24 | 35 |
| 10 | ZC434.8                                                           | EGYDISNK        | 21 | 1963  | 0.73 | 0.15 | 21 |
| 10 | ZC434.8                                                           | LIADHFLFK       | 15 | 1549  | 0.74 | 0.08 | 11 |
| 10 | ZC434.8                                                           | LIADHFLFK       | 56 | 5066  | 0.78 | 0.12 | 16 |
| 10 | ZC434.8                                                           | EGYDISNK        | 41 | 7117  | 0.80 | 0.35 | 44 |
| 10 | ZC434.8                                                           | LIADHFLFK       | 46 | 7279  | 0.80 | 0.19 | 24 |
| 22 | ZC434.8                                                           | EGYDISNK        | 55 | 7727  | 0.81 | 0.13 | 16 |
| 1  | ZC434.8                                                           | LIADHFLFK       | 20 | 931   | 0.82 | 0.09 | 11 |
| 7  | ZC434.8                                                           | LIADHFLFK       | 19 | 875   | 0.82 | 0.18 | 22 |
| 10 | ZC434.8                                                           | EGYDISNK        | 55 | 6681  | 0.82 | 0.17 | 21 |
| 7  | ZC434.8                                                           | LIADHFLFK       | 17 | 2908  | 0.83 | 0.10 | 12 |
| 1  | ZC434.8                                                           | LIADHFLFK       | 17 | 824   | 0.85 | 0.20 | 24 |
| 1  | ZC434.8                                                           | EIFNSITDPELK    | 61 | 2255  | 0.87 | 0.13 | 15 |
| 10 | ZC434.8                                                           | LIADHFLFK       | 18 | 1867  | 0.88 | 0.13 | 15 |
| 1  | ZC434.8                                                           | NVGELADLDPEGK   | 13 | 2445  | 0.89 | 0.17 | 19 |
| 1  | ZC434.8                                                           | LQIRGIHGEHSESK  | 13 | 5083  | 0.92 | 0.28 | 30 |
| 22 | ZC434.8                                                           | EGYDISNK        | 45 | 8457  | 0.92 | 0.10 | 11 |
| 22 | ZC434.8                                                           | EIFNSITDPELK    | 35 | 3232  | 0.93 | 0.18 | 19 |
| 22 | ZC434.8                                                           | EIFNSITDPELK    | 48 | 4190  | 0.93 | 0.12 | 13 |
| 22 | ZC434.8                                                           | LIADHFLFK       | 25 | 1208  | 0.95 | 0.22 | 24 |
| 7  | ZC434.8                                                           | EIFNSITDPELK    | 56 | 3525  | 0.95 | 0.07 | 7  |
| 7  | ZC434.8                                                           | LQIRGIHGEHSESK  | 12 | 5813  | 0.96 | 0.09 | 10 |
| 22 | ZC434.8                                                           | LQIRGIHGEHSESK  | 13 | 13590 | 1.06 | 0.12 | 11 |
| 22 | ZC434.8                                                           | LQIRGIHGEHSESK  | 14 | 12117 | 1.13 | 0.16 | 14 |
| 22 | ZC434.8                                                           | LIADHFLFK       | 71 | 9177  | 1.13 | 0.12 | 11 |
| 7  | ZC434.8                                                           | LQIRGIHGEHSESK  | 20 | 4623  | 1.14 | 0.09 | 8  |
| 10 | ZC434.8                                                           | SIEEVYTK        | 37 | 2312  | 1.15 | 0.20 | 17 |
| 1  | ZC434.8                                                           | EIFNSITDPELK    | 56 | 1981  | 1.28 | 0.17 | 13 |
| 7  | ZC434.8                                                           | GLNLVAAK        | 12 | 4381  | 1.28 | 0.15 | 12 |
| 22 | ZC434.8                                                           | LIADHFLFK       | 47 | 6383  | 1.43 | 0.08 | 6  |
| 10 | ZC434.8                                                           | GLNLVAAK        | 22 | 2730  | 1.44 | 0.14 | 10 |
| 7  | ZC434.8                                                           | LIADHFLFK       | 15 | 1967  | 1.50 | 0.09 | 6  |
| 1  | ZC434.8                                                           | LIADHFLFK       | 12 | 1213  | 1.52 | 0.10 | 7  |
| 10 | ZC434.8                                                           | EIFNSITDPELK    | 60 | 3774  | 1.54 | 0.13 | 8  |
| 10 | ZC434.8                                                           | NVGELADLDPEGK   | 16 | 2017  | 1.94 | 0.19 | 10 |
| 10 | ZC434.8                                                           | LIADHFLFK       | 54 | 6587  | 1.94 | 0.06 | 3  |
| 10 | ZC434.8                                                           | EIFNSITDPELK    | 38 | 3036  | 2.03 | 0.09 | 5  |
| 10 | ZC434.8                                                           | LQIRGIHGEHSESK  | 21 | 9870  | 2.48 | 0.11 | 4  |
| 10 | ZC434.8                                                           | LIADHFLFK       | 56 | 4798  | 2.56 | 0.11 | 4  |
| 10 | ZC8.4d;ZC8.4a;ZC8.4b                                              | IELLENEK        | 16 | 2482  | 0.37 | 0.26 | 71 |
| 22 | ZK1010.1;F25B5.4a                                                 | EGIPPDQQRlifAGK | 12 | 1279  | 0.44 | 0.17 | 38 |
| 10 | ZK1010.1;F25B5.4a                                                 | EGIPPDQQRlifAGK | 28 | 1205  | 0.45 | 0.14 | 30 |
| 22 | ZK1010.1;F25B5.4a                                                 | EGIPPDQQRlifAGK | 21 | 2138  | 0.53 | 0.12 | 22 |
| 10 | ZK1010.1;F25B5.4a                                                 | EGIPPDQQRlifAGK | 16 | 1121  | 0.63 | 0.25 | 40 |
| 10 | ZK1010.1;F25B5.4a                                                 | EGIPPDQQRlifAGK | 16 | 1786  | 0.69 | 0.11 | 16 |
| 22 | ZK1010.1;F25B5.4a                                                 | EGIPPDQQRlifAGK | 17 | 1194  | 0.72 | 0.32 | 45 |
| 22 | ZK1010.1;F25B5.4a                                                 | QLEDGRTLSDYNIQK | 13 | 691   | 0.75 | 0.13 | 18 |
| 22 | ZK1010.1;F25B5.4a                                                 | EGIPPDQQRlifAGK | 16 | 2035  | 0.92 | 0.25 | 27 |
| 10 | ZK1010.1;F25B5.4a                                                 | QLEDGRTLSDYNIQK | 20 | 2579  | 1.25 | 0.17 | 14 |
| 7  | ZK1010.1;F25B5.4c;F25B5.4a                                        | QLEDGRTLSDYNIQK | 17 | 1112  | 2.09 | 0.25 | 12 |
| 1  | ZK1058.1                                                          | YRLDHEQQVEVLK   | 15 | 2999  | 1.11 | 0.13 | 12 |
| 22 | ZK1058.1                                                          | LLAGTIQNDILK    | 37 | 1333  | 1.13 | 0.11 | 10 |
| 1  | ZK1058.1                                                          | YRLDHEQQVEVLK   | 16 | 3640  | 1.26 | 0.19 | 15 |
| 7  | ZK1058.1                                                          | YRLDHEQQVEVLK   | 16 | 4968  | 1.32 | 0.10 | 8  |
| 7  | ZK1058.1                                                          | YRLDHEQQVEVLK   | 12 | 2636  | 2.39 | 0.20 | 8  |
| 10 | ZK1073.1                                                          | LETVDALLVTGSK   | 43 | 1009  | 0.91 | 0.12 | 14 |
| 7  | ZK1073.1                                                          | TIILTVHDIGTNHK  | 14 | 3640  | 0.93 | 0.09 | 10 |
| 1  | ZK1073.1                                                          | SRQEYLEELK      | 13 | 383   | 1.19 | 0.23 | 19 |
| 10 | ZK1073.1                                                          | RTDLSSTIGTK     | 42 | 5233  | 1.26 | 0.04 | 4  |
| 22 | ZK1073.1                                                          | TIILTVHDIGTNHK  | 23 | 6104  | 1.26 | 0.24 | 19 |
| 10 | ZK1073.1                                                          | RTDLSSTIGTK     | 27 | 4195  | 1.32 | 0.15 | 12 |
| 22 | ZK1073.1                                                          | TIILTVHDIGTNHK  | 13 | 4223  | 2.05 | 0.08 | 4  |
| 22 | ZK1098.10d;ZK1098.10a;ZK1098.10b;ZK1098.10e;ZK1098.10f;ZK1098.10c | WTEMQRAK        | 12 | 1999  | 1.45 | 0.05 | 4  |
| 7  | ZK1127.10                                                         | NLAALEDAK       | 43 | 7479  | 0.34 | 0.33 | 97 |
| 7  | ZK1127.10                                                         | NLAALEDAK       | 47 | 4912  | 0.35 | 0.20 | 57 |
| 1  | ZK1127.10                                                         | VVDIAAVVQTAK    | 48 | 1478  | 0.40 | 0.10 | 25 |
| 22 | ZK1127.10                                                         | NLAALEDAK       | 56 | 13132 | 0.42 | 0.13 | 31 |
| 7  | ZK1127.10                                                         | NLAALEDAK       | 35 | 2247  | 0.43 | 0.21 | 49 |
| 1  | ZK1127.10                                                         | GMSGMISFYLK     | 11 | 675   | 0.46 | 0.13 | 28 |
| 7  | ZK1127.10                                                         | VVDIAAVVQTAK    | 36 | 958   | 0.46 | 0.22 | 49 |
| 10 | ZK1127.10                                                         | VVDIAAVVQTAK    | 18 | 2367  | 0.54 | 0.11 | 20 |
| 1  | ZK1127.10                                                         | VVDIAAVVQTAK    | 35 | 1385  | 0.57 | 0.15 | 26 |
| 1  | ZK1127.10                                                         | VVDIAAVVQTAK    | 38 | 1113  | 0.63 | 0.14 | 22 |
| 10 | ZK1127.10                                                         | VVDIAAVVQTAK    | 30 | 1754  | 0.64 | 0.16 | 25 |
| 22 | ZK1127.10                                                         | VVDIAAVVQTAK    | 14 | 864   | 0.64 | 0.19 | 29 |
| 22 | ZK1127.10                                                         | VVDIAAVVQTAK    | 81 | 29827 | 0.67 | 0.09 | 13 |
| 10 | ZK1127.10                                                         | VVDIAAVVQTAK    | 50 | 1765  | 0.69 | 0.15 | 22 |
| 22 | ZK1127.10                                                         | GELQESRAFLSALK  | 27 | 4614  | 0.69 | 0.30 | 43 |
| 22 | ZK1127.10                                                         | MVWFESPSNPLLK   | 45 | 672   | 0.70 | 0.10 | 14 |
| 22 | ZK1127.10                                                         | VVDIAAVVQTAK    | 32 | 1902  | 0.70 | 0.07 | 9  |
| 22 | ZK1127.10                                                         | VVDIAAVVQTAK    | 32 | 1534  | 0.70 | 0.17 | 25 |
| 22 | ZK1127.10                                                         | VVDIAAVVQTAK    | 86 | 31760 | 0.72 | 0.10 | 14 |
| 22 | ZK1127.10                                                         | NLAALEDAK       | 79 | 18959 | 0.74 | 0.03 | 4  |
| 7  | ZK1127.10                                                         | VVDIAAVVQTAK    | 26 | 1057  | 0.76 | 0.08 | 11 |
| 22 | ZK1127.10                                                         | VVDIAAVVQTAK    | 27 | 1027  | 0.79 | 0.25 | 32 |
| 10 | ZK1127.10                                                         | MVWFESPSNPLLK   | 33 | 801   | 0.79 | 0.13 | 16 |
| 7  | ZK1127.10                                                         | VVDIAAVVQTAK    | 66 | 1413  | 0.81 | 0.16 | 20 |
| 22 | ZK1127.10                                                         | MVWFESPSNPLLK   | 35 | 874   | 0.81 | 0.17 | 21 |
| 7  | ZK1127.10                                                         | VVDIAAVVQTAK    | 65 | 2227  | 0.82 | 0.21 | 26 |
| 10 | ZK1127.10                                                         | VVDIAAVVQTAK    | 50 | 1401  | 0.83 | 0.12 | 14 |
| 22 | ZK1127.10                                                         | VVDIAAVVQTAK    | 16 | 1039  | 0.84 | 0.21 | 25 |
| 10 | ZK1127.10                                                         | VVDIAAVVQTAK    | 14 | 900   | 0.84 | 0.10 | 12 |
| 10 | ZK1127.10                                                         | GELQESRAFLSALK  | 32 | 2315  | 0.85 | 0.19 | 23 |
| 10 | ZK1127.10                                                         | GELQESRAFLSALK  | 29 | 3050  | 0.85 | 0.23 | 27 |

|              |                        |    |       |      |      |    |
|--------------|------------------------|----|-------|------|------|----|
| 1 ZK1127.10  | VVDIAAVVQTAK           | 20 | 868   | 0.87 | 0.12 | 14 |
| 22 ZK1127.10 | NLAALEDAK              | 68 | 13217 | 0.87 | 0.07 | 8  |
| 7 ZK1127.10  | VVDIAAVVQTAK           | 52 | 1728  | 0.90 | 0.21 | 23 |
| 7 ZK1127.10  | VVDIAAVVQTAK           | 47 | 2098  | 0.94 | 0.15 | 16 |
| 1 ZK1127.10  | VVDIAAVVQTAK           | 20 | 1025  | 0.98 | 0.08 | 8  |
| 1 ZK1127.10  | VVDIAAVVQTAK           | 42 | 638   | 1.00 | 0.14 | 14 |
| 10 ZK1127.10 | GELQESRAFLSALK         | 32 | 1815  | 1.01 | 0.06 | 6  |
| 22 ZK1127.10 | MVWFESPSNPLLK          | 31 | 1042  | 1.02 | 0.16 | 15 |
| 10 ZK1127.10 | MVWFESPSNPLLK          | 38 | 1459  | 1.04 | 0.08 | 8  |
| 10 ZK1127.10 | VVDIAAVVQTAK           | 38 | 1362  | 1.09 | 0.15 | 13 |
| 1 ZK1127.10  | GELQESRAFLSALK         | 37 | 1280  | 1.09 | 0.17 | 16 |
| 10 ZK1127.10 | VVDIAAVVQTAK           | 49 | 1692  | 1.10 | 0.12 | 11 |
| 10 ZK1127.10 | VVDIAAVVQTAK           | 33 | 2213  | 1.18 | 0.15 | 13 |
| 10 ZK1127.10 | VVDIAAVVQTAK           | 34 | 2151  | 1.21 | 0.15 | 12 |
| 7 ZK1127.10  | MVWFESPSNPLLK          | 32 | 982   | 1.24 | 0.14 | 11 |
| 22 ZK1127.10 | GELQESRAFLSALK         | 19 | 2584  | 1.32 | 0.13 | 10 |
| 1 ZK1127.10  | VVDIAAVVQTAK           | 16 | 919   | 1.33 | 0.20 | 15 |
| 7 ZK1127.10  | MVWFESPSNPLLK          | 64 | 2046  | 1.35 | 0.11 | 8  |
| 1 ZK1127.10  | VVDIAAVVQTAK           | 27 | 1136  | 1.39 | 0.27 | 19 |
| 22 ZK1127.10 | MVWFESPSNPLLK          | 26 | 935   | 1.40 | 0.25 | 18 |
| 10 ZK1127.10 | NLAALEDAK              | 33 | 2795  | 1.41 | 0.23 | 16 |
| 7 ZK1127.10  | VVDIAAVVQTAK           | 12 | 1389  | 1.41 | 0.37 | 26 |
| 22 ZK1127.10 | GELQESRAFLSALK         | 17 | 1073  | 1.42 | 0.28 | 19 |
| 7 ZK1127.10  | VVDIAAVVQTAK           | 39 | 1336  | 1.52 | 0.23 | 15 |
| 7 ZK1127.10  | VVDIAAVVQTAK           | 16 | 908   | 1.53 | 0.10 | 7  |
| 22 ZK1127.10 | MVWFESPSNPLLK          | 28 | 703   | 1.57 | 0.21 | 14 |
| 7 ZK1127.10  | VVDIAAVVQTAK           | 22 | 811   | 1.57 | 0.36 | 23 |
| 22 ZK1127.10 | GELQESRAFLSALK         | 32 | 1028  | 1.57 | 0.20 | 13 |
| 1 ZK1127.10  | VVDIAAVVQTAK           | 52 | 2029  | 1.59 | 0.15 | 9  |
| 10 ZK1127.10 | GELQESRAFLSALK         | 45 | 1054  | 1.63 | 0.17 | 10 |
| 22 ZK1127.10 | MVWFESPSNPLLK          | 15 | 571   | 1.71 | 0.27 | 16 |
| 1 ZK1127.10  | VVDIAAVVQTAK           | 46 | 1373  | 1.80 | 0.20 | 11 |
| 22 ZK1127.10 | VVDIAAVVQTAK           | 48 | 1972  | 2.16 | 0.12 | 5  |
| 22 ZK1127.10 | VVDIAAVVQTAK           | 12 | 736   | 2.28 | 0.24 | 10 |
| 22 ZK1127.10 | VVDIAAVVQTAK           | 37 | 1723  | 2.39 | 0.12 | 5  |
| 1 ZK1127.10  | VVDIAAVVQTAK           | 62 | 1592  | 2.60 | 0.15 | 6  |
| 22 ZK1307.1a | ERSGEQPLYLEWFK         | 54 | 1962  | 0.27 | 0.24 | 89 |
| 22 ZK1307.1a | ERSGEQPLYLEWFK         | 22 | 2083  | 0.31 | 0.22 | 73 |
| 22 ZK1307.1a | AHQQWNSLK              | 28 | 8517  | 0.34 | 0.11 | 33 |
| 22 ZK1307.1a | ERSGEQPLYLEWFK         | 34 | 1670  | 0.37 | 0.13 | 35 |
| 22 ZK1307.1a | ERSGEQPLYLEWFK         | 19 | 1632  | 0.40 | 0.17 | 42 |
| 22 ZK1307.1a | RVLMVPPK               | 17 | 5119  | 0.51 | 0.19 | 38 |
| 22 ZK1307.1a | SAAHILK                | 31 | 13525 | 0.54 | 0.23 | 42 |
| 22 ZK1307.1a | RVLMVPPK               | 17 | 4232  | 0.58 | 0.08 | 15 |
| 22 ZK1307.1a | ERSGEQPLYLEWFK         | 16 | 1583  | 0.58 | 0.15 | 26 |
| 7 ZK1307.1a  | TLWAGYGERSSK           | 25 | 2002  | 0.62 | 0.25 | 40 |
| 10 ZK1307.1a | ERSGEQPLYLEWFK         | 30 | 3312  | 0.62 | 0.12 | 20 |
| 22 ZK1307.1a | RVLMVPPK               | 20 | 5389  | 0.62 | 0.10 | 17 |
| 22 ZK1307.1a | RVLMVPPK               | 19 | 3332  | 0.64 | 0.22 | 35 |
| 22 ZK1307.1a | RVLMVPPK               | 16 | 5046  | 0.71 | 0.12 | 17 |
| 10 ZK1307.1a | ERSGEQPLYLEWFK         | 11 | 1216  | 0.73 | 0.08 | 12 |
| 1 ZK1307.1a  | ERSGEQPLYLEWFK         | 18 | 684   | 0.74 | 0.10 | 14 |
| 10 ZK1307.1a | TLWAGYGERSSK           | 35 | 3605  | 0.78 | 0.19 | 24 |
| 22 ZK1307.1a | TLWAGYGERSSK           | 37 | 2932  | 0.80 | 0.39 | 48 |
| 1 ZK1307.1a  | TLWAGYGERSSK           | 12 | 1360  | 0.82 | 0.08 | 10 |
| 10 ZK1307.1a | TLWAGYGERSSK           | 38 | 3215  | 0.86 | 0.14 | 17 |
| 7 ZK1307.1a  | RVLMVPPK               | 10 | 2661  | 1.00 | 0.06 | 6  |
| 10 ZK1307.1a | RVLMVPPK               | 15 | 5114  | 1.00 | 0.14 | 14 |
| 7 ZK1307.1a  | RVLMVPPK               | 21 | 3569  | 1.02 | 0.18 | 18 |
| 22 ZK1307.1a | ERSGEQPLYLEWFK         | 36 | 960   | 1.03 | 0.08 | 8  |
| 22 ZK1307.1a | ERSGEQPLYLEWFK         | 24 | 840   | 1.09 | 0.21 | 19 |
| 10 ZK1307.1a | ERSGEQPLYLEWFK         | 36 | 1516  | 1.10 | 0.14 | 12 |
| 7 ZK1307.1a  | TLWAGYGERSSK           | 30 | 2691  | 1.10 | 0.19 | 17 |
| 1 ZK1307.1a  | RVEEVDMSEFMK           | 20 | 1371  | 1.16 | 0.21 | 18 |
| 10 ZK1307.1a | RVLMVPPK               | 19 | 4520  | 1.17 | 0.20 | 17 |
| 10 ZK1307.1a | RVLMVPPK               | 20 | 5245  | 1.18 | 0.14 | 12 |
| 1 ZK1307.1a  | SAAHILK                | 24 | 4684  | 1.19 | 0.06 | 5  |
| 10 ZK1307.1a | RVLMVPPK               | 21 | 4557  | 1.25 | 0.20 | 16 |
| 10 ZK1307.1a | SAAHILK                | 29 | 15481 | 1.28 | 0.11 | 9  |
| 10 ZK1307.1a | SAAHILK                | 28 | 11560 | 1.29 | 0.15 | 11 |
| 22 ZK1307.1a | ERSGEQPLYLEWFK         | 32 | 847   | 1.52 | 0.26 | 17 |
| 10 ZK1307.1a | RVLMVPPK               | 12 | 5497  | 1.53 | 0.18 | 12 |
| 1 ZK1307.1a  | SAAHILK                | 36 | 9136  | 1.66 | 0.07 | 4  |
| 22 ZK1307.1a | AHQQWNSLK              | 21 | 10563 | 1.71 | 0.12 | 7  |
| 22 ZK1307.1a | AHQQWNSLK              | 35 | 8746  | 1.84 | 0.07 | 4  |
| 1 ZK1307.1a  | ERSGEQPLYLEWFK         | 23 | 498   | 1.91 | 0.29 | 15 |
| 22 ZK1307.1a | TLWAGYGERSSK           | 23 | 3268  | 2.01 | 0.23 | 11 |
| 22 ZK1307.1a | TLWAGYGERSSK           | 27 | 3254  | 2.15 | 0.12 | 6  |
| 22 ZK1307.1a | SAAHILK                | 38 | 12194 | 2.26 | 0.08 | 4  |
| 22 ZK1307.1a | SAAHILK                | 32 | 10526 | 2.44 | 0.05 | 2  |
| 1 ZK1307.8   | LQDEHRNQWESVK          | 13 | 5000  | 0.67 | 0.30 | 45 |
| 22 ZK1307.8  | AYHTVDEADLEHFQSLMYDRLK | 12 | 3155  | 0.71 | 0.05 | 7  |
| 22 ZK1307.8  | LRAAEWFDELDLDK         | 46 | 1275  | 0.83 | 0.12 | 14 |
| 22 ZK1307.8  | IREAEDFANSDYGEDSAWAALK | 62 | 2390  | 0.88 | 0.21 | 23 |
| 1 ZK1307.8   | DTGAYSGTSLGSFK         | 62 | 2039  | 0.93 | 0.11 | 12 |
| 1 ZK1307.8   | DTGAYSGTSLGSFK         | 60 | 1626  | 0.98 | 0.12 | 13 |
| 22 ZK1307.8  | IREAEDFANSDYGEDSAWAALK | 59 | 2397  | 0.99 | 0.16 | 16 |
| 22 ZK1307.8  | DTGAYSGTSLGSFK         | 43 | 3299  | 1.07 | 0.14 | 13 |
| 22 ZK1307.8  | DTGAYSGTSLGSFK         | 69 | 3461  | 1.14 | 0.11 | 10 |
| 22 ZK1307.8  | DTGAYSGTSLGSFK         | 63 | 2779  | 1.19 | 0.13 | 11 |
| 22 ZK1307.8  | DTGAYSGTSLGSFK         | 35 | 2270  | 1.68 | 0.15 | 9  |
| 22 ZK1307.8  | GNFIPTNRVNDK           | 12 | 3411  | 2.48 | 0.14 | 6  |
| 1 ZK180.4    | LVFLGLDNAGK            | 56 | 1025  | 0.44 | 0.08 | 18 |
| 22 ZK180.4   | LVFLGLDNAGK            | 44 | 1878  | 0.70 | 0.14 | 20 |
| 22 ZK180.4   | LVFLGLDNAGK            | 29 | 1891  | 0.73 | 0.15 | 20 |
| 10 ZK180.4   | LVFLGLDNAGK            | 50 | 902   | 0.88 | 0.12 | 13 |
| 1 ZK180.4    | TLLHMLK                | 32 | 3606  | 0.96 | 0.16 | 17 |
| 1 ZK180.4    | TLLHMLK                | 21 | 3672  | 1.10 | 0.26 | 23 |
| 10 ZK180.4   | LVFLGLDNAGK            | 58 | 2414  | 1.23 | 0.13 | 10 |
| 10 ZK180.4   | TLLHMLK                | 26 | 2699  | 1.30 | 0.25 | 19 |
| 1 ZK180.4    | TLLHMLK                | 25 | 5428  | 1.46 | 0.24 | 16 |

|            |                   |    |       |      |      |     |
|------------|-------------------|----|-------|------|------|-----|
| 10 ZK180.4 | LVFLGLDNAGK       | 45 | 753   | 1.65 | 0.21 | 13  |
| 1 ZK180.4  | TTLHMLK           | 30 | 3682  | 1.71 | 0.17 | 10  |
| 7 ZK180.4  | LVFLGLDNAGK       | 16 | 1404  | 1.86 | 0.09 | 5   |
| 1 ZK180.4  | TTLHMLK           | 26 | 2993  | 1.91 | 0.21 | 11  |
| 10 ZK180.4 | TTLHMLK           | 20 | 3083  | 1.97 | 0.20 | 10  |
| 22 ZK180.4 | TTLHMLK           | 10 | 4203  | 2.26 | 0.31 | 14  |
| 22 ZK180.4 | LVFLGLDNAGK       | 12 | 643   | 3.18 | 0.14 | 5   |
| 22 ZK180.4 | LVFLGLDNAGK       | 14 | 637   | 3.89 | 0.14 | 4   |
| 10 ZK185.3 | FALFANAVK         | 30 | 696   | 2.36 | 0.13 | 5   |
| 7 ZK287.1  | CGDLNDALK         | 11 | 2252  | 1.17 | 0.21 | 18  |
| 22 ZK353.6 | ITVIRGEELLK       | 23 | 2441  | 0.31 | 0.10 | 32  |
| 7 ZK353.6  | ITVIRGEELLK       | 30 | 2076  | 0.32 | 0.17 | 52  |
| 22 ZK353.6 | ITVIRGEELLK       | 17 | 2329  | 0.49 | 0.32 | 65  |
| 22 ZK353.6 | AGFGGIYHVGK       | 25 | 22316 | 0.51 | 0.71 | 137 |
| 10 ZK353.6 | AGFGGIYHVGK       | 34 | 8714  | 0.52 | 0.19 | 37  |
| 10 ZK353.6 | ITVIRGEELLK       | 20 | 1356  | 0.53 | 0.28 | 52  |
| 7 ZK353.6  | AGFGGIYHVGK       | 15 | 2314  | 0.54 | 0.47 | 86  |
| 7 ZK353.6  | AGFGGIYHVGK       | 32 | 5761  | 0.55 | 0.13 | 24  |
| 10 ZK353.6 | AGFGGIYHVGK       | 40 | 10685 | 0.60 | 0.20 | 33  |
| 7 ZK353.6  | AGFGGIYHVGK       | 20 | 2345  | 0.60 | 0.69 | 115 |
| 22 ZK353.6 | AGFGGIYHVGK       | 37 | 4788  | 0.64 | 0.16 | 25  |
| 7 ZK353.6  | AGFGGIYHVGK       | 36 | 4896  | 0.66 | 0.05 | 8   |
| 22 ZK353.6 | ITVIRGEELLK       | 22 | 1937  | 0.73 | 0.27 | 38  |
| 7 ZK353.6  | ITVIRGEELLK       | 24 | 2431  | 0.74 | 0.21 | 28  |
| 1 ZK353.6  | AGFGGIYHVGK       | 42 | 6612  | 0.76 | 0.11 | 15  |
| 22 ZK353.6 | AGFGGIYHVGK       | 29 | 16547 | 0.77 | 0.14 | 18  |
| 1 ZK353.6  | GVVYDTGGLQIK      | 24 | 1114  | 0.79 | 0.28 | 35  |
| 10 ZK353.6 | ITVIRGEELLK       | 10 | 1248  | 0.84 | 0.31 | 37  |
| 1 ZK353.6  | AGFGGIYHVGK       | 25 | 4315  | 0.91 | 0.21 | 23  |
| 1 ZK353.6  | ITVIRGEELLK       | 22 | 2115  | 0.92 | 0.12 | 13  |
| 22 ZK353.6 | ITVIRGEELLK       | 11 | 1247  | 0.94 | 0.24 | 25  |
| 7 ZK353.6  | ITVIRGEELLK       | 22 | 1603  | 0.94 | 0.10 | 10  |
| 22 ZK353.6 | AGFGGIYHVGK       | 33 | 10503 | 0.95 | 0.13 | 14  |
| 1 ZK353.6  | GVVYDTGGLQIK      | 19 | 484   | 0.99 | 0.23 | 23  |
| 1 ZK353.6  | ITVIRGEELLK       | 11 | 799   | 1.05 | 0.19 | 18  |
| 7 ZK353.6  | ITVIRGEELLK       | 26 | 3694  | 1.05 | 0.09 | 8   |
| 22 ZK353.6 | ITVIRGEELLK       | 30 | 2799  | 1.12 | 0.14 | 13  |
| 7 ZK353.6  | AGFGGIYHVGK       | 44 | 13192 | 1.13 | 0.16 | 15  |
| 22 ZK353.6 | ITVIRGEELLK       | 34 | 2437  | 1.15 | 0.15 | 13  |
| 10 ZK353.6 | ITVIRGEELLK       | 25 | 1493  | 1.15 | 0.50 | 43  |
| 1 ZK353.6  | ITVIRGEELLK       | 12 | 1461  | 1.18 | 0.45 | 38  |
| 10 ZK353.6 | AGFGGIYHVGK       | 30 | 11049 | 1.49 | 0.11 | 7   |
| 10 ZK353.6 | AGFGGIYHVGK       | 13 | 6811  | 1.49 | 0.27 | 18  |
| 22 ZK455.1 | AFGLKPEDATK       | 36 | 4217  | 0.25 | 0.21 | 85  |
| 1 ZK455.1  | AFGLKPEDATK       | 32 | 5123  | 0.28 | 0.12 | 42  |
| 10 ZK455.1 | EIRLADIWPTRK      | 17 | 5492  | 0.29 | 0.17 | 58  |
| 7 ZK455.1  | YLEASGLLPYLEK     | 44 | 1503  | 0.29 | 0.23 | 78  |
| 10 ZK455.1 | AFGLKPEDATK       | 36 | 9179  | 0.33 | 0.18 | 55  |
| 22 ZK455.1 | LDLGSVPSVSGPK     | 20 | 3289  | 0.34 | 0.45 | 133 |
| 22 ZK455.1 | AFGLKPEDATK       | 44 | 7049  | 0.34 | 0.17 | 50  |
| 10 ZK455.1 | DAGIPAILAGK       | 46 | 3180  | 0.34 | 0.13 | 37  |
| 7 ZK455.1  | LDLGSVPSVSGPK     | 22 | 1484  | 0.36 | 0.07 | 21  |
| 7 ZK455.1  | YLEASGLLPYLEK     | 51 | 2080  | 0.36 | 0.15 | 42  |
| 10 ZK455.1 | DVETILDWK         | 31 | 1728  | 0.38 | 0.19 | 49  |
| 22 ZK455.1 | AFGLKPEDATK       | 46 | 5278  | 0.38 | 0.11 | 29  |
| 10 ZK455.1 | DAGIPAILAGK       | 44 | 2369  | 0.39 | 0.21 | 53  |
| 10 ZK455.1 | DAGIPAILAGK       | 27 | 2296  | 0.40 | 0.08 | 20  |
| 22 ZK455.1 | AFGLKPEDATK       | 51 | 2786  | 0.40 | 0.25 | 63  |
| 1 ZK455.1  | AFGLKPEDATK       | 32 | 4994  | 0.42 | 0.27 | 65  |
| 10 ZK455.1 | AFGLKPEDATK       | 26 | 6367  | 0.42 | 0.03 | 6   |
| 22 ZK455.1 | DAGIPAILAGK       | 36 | 1997  | 0.42 | 0.18 | 43  |
| 22 ZK455.1 | AFGLKPEDATK       | 33 | 2607  | 0.44 | 0.20 | 46  |
| 22 ZK455.1 | DAGIPAILAGK       | 43 | 2061  | 0.44 | 0.28 | 64  |
| 7 ZK455.1  | AFGLKPEDATK       | 34 | 3075  | 0.44 | 0.19 | 44  |
| 10 ZK455.1 | DAGIPAILAGK       | 75 | 5345  | 0.46 | 0.27 | 58  |
| 22 ZK455.1 | AFGLKPEDATK       | 58 | 8855  | 0.47 | 0.18 | 39  |
| 22 ZK455.1 | AFGLKPEDATK       | 49 | 8694  | 0.49 | 0.15 | 30  |
| 1 ZK455.1  | DAGIPAILAGK       | 22 | 1576  | 0.49 | 0.09 | 17  |
| 10 ZK455.1 | DAGIPAILAGK       | 44 | 3425  | 0.51 | 0.20 | 40  |
| 1 ZK455.1  | DAGIPAILAGK       | 46 | 2189  | 0.51 | 0.13 | 25  |
| 22 ZK455.1 | LDLGSVPSVSGPK     | 11 | 747   | 0.51 | 0.27 | 52  |
| 10 ZK455.1 | AFGLKPEDATK       | 40 | 6518  | 0.53 | 0.08 | 14  |
| 10 ZK455.1 | NLRDLGVVGK        | 16 | 3013  | 0.54 | 0.10 | 19  |
| 10 ZK455.1 | DAGIPAILAGK       | 49 | 2392  | 0.54 | 0.13 | 24  |
| 10 ZK455.1 | DVETILDWK         | 27 | 1147  | 0.55 | 0.07 | 13  |
| 22 ZK455.1 | AFGLKPEDATK       | 40 | 7159  | 0.56 | 0.45 | 81  |
| 7 ZK455.1  | RPHDRVELASLAQDFSK | 13 | 20572 | 0.56 | 0.20 | 37  |
| 10 ZK455.1 | AVELGLNVQPYVK     | 53 | 3746  | 0.56 | 0.12 | 22  |
| 22 ZK455.1 | AFGLKPEDATK       | 38 | 8621  | 0.57 | 0.15 | 27  |
| 10 ZK455.1 | DAGIPAILAGK       | 58 | 2959  | 0.57 | 0.16 | 29  |
| 22 ZK455.1 | DAGIPAILAGK       | 39 | 1469  | 0.57 | 0.27 | 48  |
| 7 ZK455.1  | RPHDRVELASLAQDFSK | 14 | 6893  | 0.57 | 0.10 | 17  |
| 7 ZK455.1  | RPHDRVELASLAQDFSK | 13 | 6109  | 0.58 | 0.19 | 33  |
| 10 ZK455.1 | DAGIPAILAGK       | 19 | 2091  | 0.59 | 0.44 | 74  |
| 1 ZK455.1  | DAGIPAILAGK       | 25 | 1068  | 0.61 | 0.22 | 36  |
| 22 ZK455.1 | YLEASGLLPYLEK     | 33 | 2978  | 0.63 | 0.20 | 32  |
| 10 ZK455.1 | LYPWDDASTYIK      | 17 | 2265  | 0.64 | 0.16 | 25  |
| 1 ZK455.1  | DAGIPAILAGK       | 10 | 917   | 0.65 | 0.16 | 25  |
| 10 ZK455.1 | YLEASGLLPYLEK     | 47 | 3010  | 0.65 | 0.17 | 27  |
| 22 ZK455.1 | RPHDRVELASLAQDFSK | 11 | 3587  | 0.65 | 0.15 | 23  |
| 7 ZK455.1  | DAGIPAILAGK       | 39 | 2675  | 0.66 | 0.25 | 38  |
| 22 ZK455.1 | YLEASGLLPYLEK     | 17 | 2288  | 0.66 | 0.29 | 43  |
| 7 ZK455.1  | YLEASGLLPYLEK     | 21 | 2421  | 0.66 | 0.09 | 13  |
| 22 ZK455.1 | AVELGLNVQPYVK     | 42 | 2987  | 0.67 | 0.12 | 18  |
| 1 ZK455.1  | GPFLQGVK          | 15 | 1075  | 0.68 | 0.08 | 11  |
| 1 ZK455.1  | DAGIPAILAGK       | 58 | 2029  | 0.69 | 0.18 | 26  |
| 10 ZK455.1 | AFGLKPEDATK       | 39 | 6534  | 0.69 | 0.12 | 17  |
| 10 ZK455.1 | DAGIPAILAGK       | 21 | 1248  | 0.70 | 0.14 | 20  |
| 22 ZK455.1 | DVETILDWK         | 24 | 1379  | 0.71 | 0.22 | 31  |
| 7 ZK455.1  | DAGIPAILAGK       | 40 | 2966  | 0.73 | 0.20 | 28  |
| 22 ZK455.1 | NLRDLGVVGK        | 16 | 1442  | 0.73 | 0.16 | 21  |

|                               |                   |    |       |       |      |    |
|-------------------------------|-------------------|----|-------|-------|------|----|
| 7 ZK455.1                     | LDLGSVVPVSGPK     | 35 | 2858  | 0.73  | 0.13 | 18 |
| 22 ZK455.1                    | RPHDRVELASLAQDFSK | 12 | 7150  | 0.73  | 0.08 | 11 |
| 22 ZK455.1                    | AVELGLNVQPYVK     | 28 | 1363  | 0.74  | 0.15 | 20 |
| 7 ZK455.1                     | AFGLKPEDATK       | 45 | 4247  | 0.74  | 0.25 | 34 |
| 7 ZK455.1                     | DVETILDWK         | 15 | 595   | 0.76  | 0.10 | 13 |
| 10 ZK455.1                    | AVELGLNVQPYVK     | 52 | 3835  | 0.77  | 0.12 | 15 |
| 7 ZK455.1                     | YLEASGLLPYLEK     | 23 | 2594  | 0.77  | 0.16 | 21 |
| 10 ZK455.1                    | RPHDRVELASLAQDFSK | 26 | 4864  | 0.79  | 0.20 | 25 |
| 22 ZK455.1                    | DAGIPAILAGK       | 51 | 5804  | 0.79  | 0.13 | 17 |
| 1 ZK455.1                     | DAGIPAILAGK       | 72 | 1853  | 0.80  | 0.19 | 23 |
| 10 ZK455.1                    | DAGIPAILAGK       | 33 | 2299  | 0.80  | 0.32 | 40 |
| 7 ZK455.1                     | LDLGSVVPVSGPK     | 18 | 1673  | 0.80  | 0.14 | 18 |
| 22 ZK455.1                    | DAGIPAILAGK       | 19 | 1275  | 0.82  | 0.18 | 22 |
| 1 ZK455.1                     | YLEASGLLPYLEK     | 17 | 637   | 0.82  | 0.18 | 21 |
| 10 ZK455.1                    | LYPWDDASTYIK      | 23 | 2295  | 0.82  | 0.33 | 40 |
| 10 ZK455.1                    | LDLGSVVPVSGPK     | 48 | 2591  | 0.82  | 0.11 | 14 |
| 10 ZK455.1                    | DAGIPAILAGK       | 14 | 1431  | 0.84  | 0.13 | 16 |
| 10 ZK455.1                    | DVETILDWK         | 21 | 1092  | 0.85  | 0.17 | 19 |
| 10 ZK455.1                    | DAGIPAILAGK       | 26 | 1615  | 0.86  | 0.02 | 3  |
| 22 ZK455.1                    | DAGIPAILAGK       | 86 | 11073 | 0.87  | 0.10 | 11 |
| 10 ZK455.1                    | DAGIPAILAGK       | 18 | 1436  | 0.89  | 0.22 | 25 |
| 22 ZK455.1                    | DAGIPAILAGK       | 17 | 1011  | 0.89  | 0.18 | 20 |
| 10 ZK455.1                    | RPHDRVELASLAQDFSK | 15 | 6717  | 0.91  | 0.12 | 13 |
| 10 ZK455.1                    | YLEASGLLPYLEK     | 22 | 1776  | 0.91  | 0.14 | 16 |
| 22 ZK455.1                    | NLRDLGVVGK        | 14 | 2302  | 0.93  | 0.15 | 16 |
| 1 ZK455.1                     | DAGIPAILAGK       | 17 | 1136  | 0.94  | 0.14 | 15 |
| 10 ZK455.1                    | DAGIPAILAGK       | 40 | 1491  | 0.94  | 0.16 | 17 |
| 22 ZK455.1                    | DVETILDWK         | 32 | 1534  | 0.95  | 0.14 | 15 |
| 22 ZK455.1                    | AVELGLNVQPYVK     | 20 | 1591  | 0.98  | 0.16 | 16 |
| 22 ZK455.1                    | DAGIPAILAGK       | 13 | 1329  | 0.98  | 0.09 | 9  |
| 22 ZK455.1                    | NLRDLGVVGK        | 14 | 3722  | 1.00  | 0.07 | 7  |
| 1 ZK455.1                     | NLRDLGVVGK        | 16 | 1667  | 1.00  | 0.18 | 18 |
| 1 ZK455.1                     | DAGIPAILAGK       | 35 | 1580  | 1.02  | 0.15 | 15 |
| 22 ZK455.1                    | LDLGSVVPVSGPK     | 12 | 1232  | 1.03  | 0.06 | 5  |
| 1 ZK455.1                     | DAGIPAILAGK       | 12 | 912   | 1.04  | 0.16 | 15 |
| 22 ZK455.1                    | YLEASGLLPYLEK     | 31 | 1937  | 1.11  | 0.03 | 3  |
| 22 ZK455.1                    | DVETILDWK         | 20 | 1963  | 1.12  | 0.08 | 7  |
| 10 ZK455.1                    | DAGIPAILAGK       | 18 | 590   | 1.15  | 0.03 | 2  |
| 10 ZK455.1                    | DAGIPAILAGK       | 16 | 1228  | 1.16  | 0.35 | 30 |
| 10 ZK455.1                    | DAGIPAILAGK       | 16 | 997   | 1.17  | 0.14 | 12 |
| 22 ZK455.1                    | GPFLQGVK          | 17 | 1664  | 1.17  | 0.18 | 15 |
| 1 ZK455.1                     | NLRDLGVVGK        | 16 | 1818  | 1.18  | 0.13 | 11 |
| 22 ZK455.1                    | DVETILDWK         | 13 | 1776  | 1.19  | 0.09 | 7  |
| 1 ZK455.1                     | DAGIPAILAGK       | 46 | 1785  | 1.21  | 0.15 | 13 |
| 7 ZK455.1                     | DAGIPAILAGK       | 55 | 8716  | 1.22  | 0.20 | 16 |
| 22 ZK455.1                    | NLRDLGVVGK        | 10 | 7111  | 1.23  | 0.10 | 9  |
| 1 ZK455.1                     | DVETILDWK         | 12 | 527   | 1.23  | 0.13 | 11 |
| 22 ZK455.1                    | RPHDRVELASLAQDFSK | 12 | 7049  | 1.24  | 0.16 | 13 |
| 7 ZK455.1                     | DAGIPAILAGK       | 61 | 8218  | 1.24  | 0.04 | 3  |
| 1 ZK455.1                     | YLEASGLLPYLEK     | 13 | 649   | 1.28  | 0.14 | 11 |
| 22 ZK455.1                    | RPHDRVELASLAQDFSK | 15 | 7940  | 1.36  | 0.22 | 16 |
| 22 ZK455.1                    | YLEASGLLPYLEK     | 36 | 2152  | 1.36  | 0.11 | 8  |
| 10 ZK455.1                    | RPHDRVELASLAQDFSK | 11 | 4324  | 1.41  | 0.02 | 1  |
| 7 ZK455.1                     | TSLSPGSGVVTK      | 11 | 1441  | 1.43  | 0.12 | 8  |
| 10 ZK455.1                    | RPHDRVELASLAQDFSK | 12 | 16770 | 1.48  | 0.12 | 8  |
| 10 ZK455.1                    | RPHDRVELASLAQDFSK | 18 | 3919  | 1.52  | 0.07 | 5  |
| 22 ZK455.1                    | NLRDLGVVGK        | 12 | 4933  | 1.55  | 0.07 | 4  |
| 1 ZK455.1                     | GPFLQGVK          | 16 | 2005  | 1.55  | 0.09 | 6  |
| 10 ZK455.1                    | RPHDRVELASLAQDFSK | 22 | 8038  | 1.57  | 0.16 | 10 |
| 10 ZK455.1                    | RPHDRVELASLAQDFSK | 13 | 15185 | 1.59  | 0.07 | 5  |
| 10 ZK455.1                    | NLRDLGVVGK        | 15 | 5217  | 1.61  | 0.09 | 6  |
| 22 ZK455.1                    | NLRDLGVVGK        | 10 | 3219  | 1.66  | 0.12 | 7  |
| 22 ZK455.1                    | DVETILDWK         | 16 | 604   | 1.81  | 0.36 | 20 |
| 1 ZK455.1                     | RPHDRVELASLAQDFSK | 12 | 5916  | 1.81  | 0.11 | 6  |
| 10 ZK455.1                    | GPFLQGVK          | 13 | 2282  | 1.83  | 0.16 | 8  |
| 10 ZK455.1                    | RPHDRVELASLAQDFSK | 15 | 4139  | 1.89  | 0.17 | 9  |
| 10 ZK455.1                    | RPHDRVELASLAQDFSK | 15 | 17145 | 2.00  | 0.15 | 7  |
| 10 ZK455.1                    | DAGIPAILAGK       | 20 | 932   | 2.01  | 0.14 | 7  |
| 10 ZK455.1                    | RPHDRVELASLAQDFSK | 16 | 7468  | 2.03  | 0.16 | 8  |
| 10 ZK455.1                    | NLRDLGVVGK        | 20 | 1655  | 2.41  | 0.12 | 5  |
| 10 ZK455.1                    | NLRDLGVVGK        | 22 | 1502  | 2.44  | 0.23 | 10 |
| 1 ZK455.1                     | AFGLKPEDATK       | 39 | 3382  | 2.99  | 0.41 | 14 |
| 1 ZK455.1                     | AFGLKPEDATK       | 29 | 3900  | 11.91 | 0.61 | 5  |
| 10 ZK470.5a;ZK470.5b          | LFLTGPLPK         | 13 | 1002  | 0.57  | 0.09 | 16 |
| 10 ZK470.5a;ZK470.5b          | LFLTGPLPK         | 11 | 1121  | 1.21  | 0.13 | 11 |
| 22 ZK470.5a;ZK470.5b          | LFLTGPLPK         | 10 | 799   | 1.31  | 0.17 | 13 |
| 22 ZK470.5a;ZK470.5b          | LFLTGPLPK         | 24 | 923   | 1.78  | 0.17 | 9  |
| 10 ZK593.1a;ZK593.1b;ZK593.1c | HFEELILHTK        | 24 | 4380  | 1.35  | 0.23 | 17 |
| 7 ZK593.1a;ZK593.1b;ZK593.1c  | HFEELILHTK        | 24 | 5462  | 1.36  | 0.34 | 25 |
| 7 ZK593.1a;ZK593.1b;ZK593.1c  | HFEELILHTK        | 21 | 7488  | 1.52  | 0.31 | 21 |
| 22 ZK593.1a;ZK593.1b;ZK593.1c | HFEELILHTK        | 10 | 4785  | 1.54  | 0.17 | 11 |
| 10 ZK593.1a;ZK593.1b;ZK593.1c | HFEELILHTK        | 24 | 2402  | 1.55  | 0.12 | 8  |
| 7 ZK593.1a;ZK593.1b;ZK593.1c  | HFEELILHTK        | 18 | 1476  | 1.83  | 0.22 | 12 |
| 1 ZK593.1a;ZK593.1b;ZK593.1c  | HFEELILHTK        | 22 | 4662  | 1.92  | 0.16 | 8  |
| 10 ZK593.1a;ZK593.1b;ZK593.1c | HFEELILHTK        | 20 | 9067  | 1.95  | 0.09 | 4  |
| 1 ZK593.1a;ZK593.1b;ZK593.1c  | HIYIIAK           | 13 | 4992  | 2.01  | 0.18 | 9  |
| 22 ZK593.4                    | IVNVEITLSK        | 19 | 16600 | 0.66  | 0.12 | 19 |
| 22 ZK593.4                    | IVNVEITLSK        | 18 | 9594  | 1.34  | 0.26 | 19 |
| 1 ZK593.4                     | IVNVEITLSK        | 31 | 2096  | 1.38  | 0.13 | 10 |
| 10 ZK593.4                    | IVNVEITLSK        | 12 | 17461 | 2.07  | 0.09 | 5  |
| 7 ZK593.4                     | IVNVEITLSK        | 15 | 2690  | 2.51  | 0.16 | 7  |
| 22 ZK593.4                    | IVNVEITLSK        | 13 | 16390 | 2.76  | 0.57 | 21 |
| 10 ZK593.4                    | IVNVEITLSK        | 14 | 5080  | 13.99 | 0.49 | 3  |
| 10 ZK593.4                    | IVNVEITLSK        | 15 | 4960  | 21.48 | 0.36 | 2  |
| 22 ZK6.7a;ZK6.7b              | FFALAPIGSVK       | 22 | 1352  | 1.06  | 0.22 | 21 |
| 7 ZK617.1b;ZK617.1a           | LSEGHEYK          | 17 | 918   | 0.37  | 0.24 | 65 |
| 7 ZK617.1b;ZK617.1a           | IIVNEHGK          | 10 | 1624  | 0.39  | 0.08 | 21 |
| 7 ZK617.1b;ZK617.1a           | LSEGHEYK          | 17 | 973   | 0.40  | 0.24 | 60 |
| 7 ZK617.1b;ZK617.1a           | LSEGHEYK          | 22 | 1041  | 0.41  | 0.31 | 76 |
| 7 ZK617.1b;ZK617.1a           | LSEGHEYK          | 14 | 618   | 0.42  | 0.09 | 22 |
| 7 ZK617.1b;ZK617.1a           | DTNFHVDDLTQGHEYK  | 14 | 2326  | 0.57  | 0.07 | 13 |

|                               |                        |    |      |      |      |    |
|-------------------------------|------------------------|----|------|------|------|----|
| 7 ZK617.1b;ZK617.1a           | AVNRHGSDPLEAREAIIAK    | 12 | 2969 | 0.66 | 0.17 | 25 |
| 7 ZK617.1b;ZK617.1a           | DTNFHVDDLTOGHEYK       | 18 | 3383 | 0.73 | 0.13 | 18 |
| 7 ZK617.1b;ZK617.1a           | AVNRQGTSAPLTSDHAIKAK   | 56 | 1887 | 0.80 | 0.23 | 29 |
| 7 ZK617.1b;ZK617.1a           | AVNRQGTSAPLTSDHAIKAK   | 31 | 1088 | 0.90 | 0.13 | 14 |
| 7 ZK617.1b;ZK617.1a           | SSTTSIFFPSAK           | 36 | 2055 | 0.99 | 0.06 | 6  |
| 7 ZK617.1b;ZK617.1a           | SSTTSIFFPSAK           | 11 | 1374 | 1.03 | 0.06 | 6  |
| 7 ZK617.1b;ZK617.1a           | RIDIDGVK               | 18 | 1030 | 1.28 | 0.13 | 10 |
| 22 ZK617.1b;ZK617.1a;ZK617.1c | AVNRHGSDPLEAREAIIAK    | 28 | 5609 | 0.44 | 0.11 | 25 |
| 22 ZK617.1b;ZK617.1a;ZK617.1c | AVNRQGTSAPLTSDHAIKAK   | 65 | 2546 | 0.49 | 0.20 | 40 |
| 22 ZK617.1b;ZK617.1a;ZK617.1c | LSEGHEYK               | 30 | 3254 | 0.51 | 0.20 | 39 |
| 22 ZK617.1b;ZK617.1a;ZK617.1c | LSEGHEYK               | 38 | 3337 | 0.58 | 0.13 | 22 |
| 22 ZK617.1b;ZK617.1a;ZK617.1c | AVNLQGESKPLEAEEPIAK    | 24 | 2343 | 0.60 | 0.12 | 20 |
| 22 ZK617.1b;ZK617.1a;ZK617.1c | VTVLDPSPRGLDVTNIVK     | 10 | 2290 | 0.60 | 0.14 | 24 |
| 22 ZK617.1b;ZK617.1a;ZK617.1c | ILVPFAASPAPK           | 26 | 1156 | 0.61 | 0.13 | 21 |
| 22 ZK617.1b;ZK617.1a;ZK617.1c | AVNRQGTSAPLTSDHAIKAK   | 66 | 3267 | 0.63 | 0.16 | 25 |
| 22 ZK617.1b;ZK617.1a;ZK617.1c | AVNRHGSDPLEAREAIIAK    | 14 | 5562 | 0.66 | 0.15 | 23 |
| 22 ZK617.1b;ZK617.1a;ZK617.1c | ILVPFAASPAPK           | 16 | 885  | 0.76 | 0.15 | 20 |
| 22 ZK617.1b;ZK617.1a;ZK617.1c | TTAVVDGLIPGHEYK        | 47 | 1877 | 0.77 | 0.15 | 20 |
| 22 ZK617.1b;ZK617.1a;ZK617.1c | TTAVVDGLIPGHEYK        | 40 | 1978 | 0.78 | 0.12 | 16 |
| 22 ZK617.1b;ZK617.1a;ZK617.1c | SSTTSIFFPSAK           | 13 | 1935 | 0.85 | 0.05 | 5  |
| 22 ZK617.1b;ZK617.1a;ZK617.1c | SRFGPPGPIHVGAK         | 25 | 3409 | 0.87 | 0.13 | 15 |
| 22 ZK617.1b;ZK617.1a;ZK617.1c | TTVPNLQPGHEYK          | 33 | 2644 | 0.88 | 0.15 | 17 |
| 22 ZK617.1b;ZK617.1a;ZK617.1c | IIVENEHGK              | 29 | 2221 | 0.93 | 0.12 | 13 |
| 22 ZK617.1b;ZK617.1a;ZK617.1c | LVIPSTRRSDSGPVK        | 15 | 2299 | 0.93 | 0.33 | 35 |
| 22 ZK617.1b;ZK617.1a;ZK617.1c | AVNRQGTSAPLTSDHAIKAK   | 62 | 5115 | 0.93 | 0.11 | 12 |
| 22 ZK617.1b;ZK617.1a;ZK617.1c | RVPDTNASISGLK          | 30 | 1207 | 0.96 | 0.16 | 16 |
| 22 ZK617.1b;ZK617.1a;ZK617.1c | DTNFHVDDLTOGHEYK       | 23 | 2766 | 0.97 | 0.07 | 7  |
| 22 ZK617.1b;ZK617.1a;ZK617.1c | RIDIDGVK               | 23 | 1651 | 1.00 | 0.05 | 5  |
| 22 ZK617.1b;ZK617.1a;ZK617.1c | SRFGPPGPIHVGAK         | 30 | 3462 | 1.01 | 0.13 | 13 |
| 22 ZK617.1b;ZK617.1a;ZK617.1c | EYAFRVK                | 17 | 1762 | 1.01 | 0.11 | 11 |
| 1 ZK617.1b;ZK617.1a;ZK617.1c  | ARNVPPVIDRNSIQEIK      | 10 | 1768 | 1.13 | 0.07 | 6  |
| 22 ZK617.1b;ZK617.1a;ZK617.1c | RIDIDGVK               | 32 | 1835 | 1.15 | 0.15 | 13 |
| 22 ZK617.1b;ZK617.1a;ZK617.1c | TTVPNLQPGHEYK          | 29 | 1921 | 1.16 | 0.12 | 10 |
| 22 ZK617.1b;ZK617.1a;ZK617.1c | AVNRQGTSAPLTSDHAIKAK   | 51 | 3385 | 1.22 | 0.19 | 16 |
| 22 ZK617.1b;ZK617.1a;ZK617.1c | DTNFHVDDLTOGHEYK       | 19 | 1489 | 1.25 | 0.10 | 8  |
| 1 ZK617.1b;ZK617.1a;ZK617.1c  | RIDIDGVK               | 13 | 833  | 1.25 | 0.10 | 8  |
| 22 ZK617.1b;ZK617.1a;ZK617.1c | RGGGDWAPVK             | 22 | 1312 | 1.32 | 0.20 | 15 |
| 22 ZK617.1b;ZK617.1a;ZK617.1c | EYAFRVK                | 20 | 1706 | 1.38 | 0.25 | 18 |
| 1 ZK617.1b;ZK617.1a;ZK617.1c  | AVNRQGTSAPLTSDHAIKAK   | 57 | 2433 | 1.48 | 0.14 | 9  |
| 1 ZK617.1b;ZK617.1a;ZK617.1c  | AVNRQGTSAPLTSDHAIKAK   | 25 | 1365 | 1.53 | 0.09 | 6  |
| 22 ZK617.1b;ZK617.1a;ZK617.1c | TTAVVDGLIPGHEYK        | 11 | 1110 | 1.64 | 0.20 | 12 |
| 1 ZK617.1b;ZK617.1a;ZK617.1c  | SSTTSIFFPSAK           | 13 | 1038 | 1.66 | 0.12 | 7  |
| 22 ZK617.1b;ZK617.1a;ZK617.1c | IGGEPIEVK              | 10 | 529  | 1.67 | 0.18 | 11 |
| 22 ZK617.1b;ZK617.1a;ZK617.1c | TTAVVDGLIPGHEYK        | 36 | 1915 | 1.74 | 0.14 | 8  |
| 1 ZK617.1b;ZK617.1a;ZK617.1c  | TTAVVDGLIPGHEYK        | 21 | 1136 | 1.84 | 0.18 | 10 |
| 1 ZK617.1b;ZK617.1a;ZK617.1c  | TTAVVDGLIPGHEYK        | 28 | 1104 | 2.14 | 0.19 | 9  |
| 10 ZK617.1b;ZK617.1c;ZK617.1a | EYAFRVK                | 15 | 3097 | 0.38 | 0.28 | 74 |
| 10 ZK617.1b;ZK617.1c;ZK617.1a | DTNFHVDDLTOGHEYK       | 34 | 3842 | 0.38 | 0.10 | 28 |
| 10 ZK617.1b;ZK617.1c;ZK617.1a | DTNFHVDDLTOGHEYK       | 26 | 4251 | 0.39 | 0.11 | 28 |
| 10 ZK617.1b;ZK617.1c;ZK617.1a | DTNFHVDDLTOGHEYK       | 40 | 4389 | 0.39 | 0.16 | 40 |
| 10 ZK617.1b;ZK617.1c;ZK617.1a | LDIAFEGEPAPVK          | 42 | 1132 | 0.42 | 0.06 | 14 |
| 10 ZK617.1b;ZK617.1c;ZK617.1a | AVNLQGESKPLEAEEPIAK    | 21 | 1813 | 0.46 | 0.13 | 29 |
| 10 ZK617.1b;ZK617.1c;ZK617.1a | EYAFRVK                | 17 | 1980 | 0.46 | 0.11 | 25 |
| 10 ZK617.1b;ZK617.1c;ZK617.1a | DTNFHVDDLTOGHEYK       | 26 | 3774 | 0.50 | 0.14 | 28 |
| 10 ZK617.1b;ZK617.1c;ZK617.1a | AVNRHGSDPLEAREAIIAK    | 10 | 3853 | 0.51 | 0.21 | 41 |
| 10 ZK617.1b;ZK617.1c;ZK617.1a | LDIAFEGEPAPVK          | 62 | 1071 | 0.52 | 0.28 | 54 |
| 10 ZK617.1b;ZK617.1c;ZK617.1a | RALRSDTGTYIIK          | 12 | 2988 | 0.55 | 0.05 | 8  |
| 10 ZK617.1b;ZK617.1c;ZK617.1a | AVNRQGTSAPLTSDHAIKAK   | 53 | 5096 | 0.67 | 0.07 | 11 |
| 10 ZK617.1b;ZK617.1c;ZK617.1a | AVNRQGTSAPLTSDHAIKAK   | 61 | 4268 | 0.72 | 0.13 | 18 |
| 10 ZK617.1b;ZK617.1c;ZK617.1a | RGGGDWAPVK             | 28 | 2755 | 0.78 | 0.14 | 18 |
| 10 ZK617.1b;ZK617.1c;ZK617.1a | RIDIDGVK               | 20 | 1966 | 0.79 | 0.08 | 10 |
| 10 ZK617.1b;ZK617.1c;ZK617.1a | RIDIDGVK               | 24 | 2388 | 0.99 | 0.05 | 5  |
| 10 ZK617.1b;ZK617.1c;ZK617.1a | ILVPFAASPAPK           | 41 | 1617 | 1.05 | 0.15 | 14 |
| 10 ZK617.1b;ZK617.1c;ZK617.1a | RIDIDGVK               | 38 | 2145 | 1.06 | 0.11 | 10 |
| 10 ZK617.1b;ZK617.1c;ZK617.1a | RVPDTNASISGLK          | 31 | 772  | 1.08 | 0.28 | 26 |
| 10 ZK617.1b;ZK617.1c;ZK617.1a | TTAVVDGLIPGHEYK        | 39 | 1679 | 1.12 | 0.14 | 13 |
| 10 ZK617.1b;ZK617.1c;ZK617.1a | TTAVVDGLIPGHEYK        | 67 | 1267 | 1.15 | 0.17 | 15 |
| 10 ZK617.1b;ZK617.1c;ZK617.1a | ILVPFAASPAPK           | 56 | 1727 | 1.17 | 0.08 | 7  |
| 10 ZK617.1b;ZK617.1c;ZK617.1a | TTVPNLQPGHEYK          | 15 | 2497 | 1.18 | 0.15 | 13 |
| 10 ZK617.1b;ZK617.1c;ZK617.1a | TTVPNLQPGHEYK          | 20 | 3714 | 1.19 | 0.16 | 13 |
| 10 ZK617.1b;ZK617.1c;ZK617.1a | ILTASRK                | 12 | 1688 | 1.23 | 0.08 | 6  |
| 10 ZK617.1b;ZK617.1c;ZK617.1a | ILVPFAASPAPK           | 42 | 1133 | 1.25 | 0.24 | 19 |
| 10 ZK617.1b;ZK617.1c;ZK617.1a | RVPDTNASISGLK          | 26 | 1484 | 1.33 | 0.19 | 14 |
| 10 ZK617.1b;ZK617.1c;ZK617.1a | RVPDTNASISGLK          | 30 | 1173 | 1.42 | 0.11 | 8  |
| 10 ZK617.1b;ZK617.1c;ZK617.1a | GIPSLPSGPIK            | 16 | 1350 | 1.50 | 0.16 | 11 |
| 10 ZK617.1b;ZK617.1c;ZK617.1a | GIPSLPSGPIK            | 13 | 990  | 2.36 | 0.09 | 4  |
| 10 ZK617.1b;ZK617.1c;ZK617.1a | HRVTGLTPK              | 22 | 1245 | 2.55 | 0.27 | 11 |
| 10 ZK617.1b;ZK617.1c;ZK617.1a | HRVTGLTPK              | 26 | 1776 | 2.74 | 0.13 | 5  |
| 22 ZK622.3b;ZK622.3a;ZK622.3c | GTSFNELVELIK           | 34 | 680  | 0.58 | 0.16 | 28 |
| 22 ZK622.3b;ZK622.3a;ZK622.3c | GTSFNELVELIK           | 34 | 822  | 0.88 | 0.11 | 13 |
| 22 ZK622.3b;ZK622.3a;ZK622.3c | NQERNAHLGNINYQVGDAVGLK | 48 | 6776 | 0.92 | 0.17 | 18 |
| 1 ZK622.3b;ZK622.3a;ZK622.3c  | GTSFNELVELIK           | 46 | 856  | 1.28 | 0.24 | 18 |
| 22 ZK622.3b;ZK622.3a;ZK622.3c | NQERNAHLGNINYQVGDAVGLK | 63 | 6977 | 1.43 | 0.10 | 7  |
| 1 ZK622.3b;ZK622.3a;ZK622.3c  | QRIQELGYTLK            | 16 | 1522 | 1.62 | 0.09 | 6  |
| 22 ZK622.3b;ZK622.3a;ZK622.3c | QRIQELGYTLK            | 23 | 1100 | 2.17 | 0.10 | 5  |
| 10 ZK622.3d;ZK622.3a;ZK622.3c | GTSFNELVELIK           | 30 | 1240 | 0.30 | 0.20 | 67 |
| 7 ZK622.3d;ZK622.3a;ZK622.3c  | GTSFNELVELIK           | 24 | 542  | 0.38 | 0.17 | 45 |
| 10 ZK622.3d;ZK622.3a;ZK622.3c | GTSFNELVELIK           | 50 | 1392 | 0.87 | 0.19 | 22 |
| 7 ZK622.3d;ZK622.3a;ZK622.3c  | GTSFNELVELIK           | 39 | 648  | 0.95 | 0.11 | 12 |
| 10 ZK622.3d;ZK622.3a;ZK622.3c | GTSFNELVELIK           | 62 | 1126 | 1.20 | 0.16 | 14 |
| 10 ZK622.3d;ZK622.3a;ZK622.3c | GTSFNELVELIK           | 60 | 1352 | 1.26 | 0.10 | 8  |
| 7 ZK622.3d;ZK622.3a;ZK622.3c  | GTSFNELVELIK           | 18 | 465  | 1.26 | 0.11 | 9  |
| 10 ZK622.3d;ZK622.3a;ZK622.3c | GTSFNELVELIK           | 49 | 829  | 1.32 | 0.15 | 11 |
| 10 ZK622.3d;ZK622.3a;ZK622.3c | NQERNAHLGNINYQVGDAVGLK | 89 | 8425 | 2.01 | 0.11 | 6  |
| 7 ZK622.3d;ZK622.3a;ZK622.3c  | QRIQELGYTLK            | 10 | 969  | 2.09 | 0.29 | 14 |
| 10 ZK622.3d;ZK622.3a;ZK622.3c | NQERNAHLGNINYQVGDAVGLK | 53 | 7344 | 2.21 | 0.13 | 6  |
| 7 ZK632.4                     | QLLATSPELQGK           | 50 | 2060 | 1.20 | 0.32 | 27 |
| 7 ZK632.4                     | GNLSFLFK               | 15 | 536  | 1.51 | 0.11 | 7  |
| 1 ZK652.9                     | VHHVFANVAK             | 39 | 8407 | 1.91 | 0.08 | 4  |
| 10 ZK652.9                    | VHHVFANVAK             | 15 | 7587 | 1.92 | 0.05 | 2  |
| 10 ZK652.9                    | VHHVFANVAK             | 22 | 3893 | 2.08 | 0.10 | 5  |

|                      |                 |     |       |      |      |     |
|----------------------|-----------------|-----|-------|------|------|-----|
| 1 ZK652.9            | VHHVFANVAK      | 14  | 4089  | 2.19 | 0.06 | 3   |
| 1 ZK673.2            | VLIDRLSK        | 15  | 1067  | 0.81 | 0.18 | 22  |
| 22 ZK673.2           | MVEEQAPLNLIVELK | 28  | 1654  | 0.86 | 0.17 | 20  |
| 10 ZK673.2           | VLIDRLSK        | 11  | 1102  | 1.08 | 0.05 | 5   |
| 22 ZK673.2           | MVEEQAPLNLIVELK | 29  | 1727  | 1.19 | 0.17 | 14  |
| 22 ZK673.2           | MVEEQAPLNLIVELK | 17  | 1408  | 1.25 | 0.14 | 11  |
| 1 ZK673.2            | VLIDRLSK        | 21  | 1338  | 1.35 | 0.27 | 20  |
| 22 ZK673.2           | MVEEQAPLNLIVELK | 33  | 1956  | 1.54 | 0.19 | 12  |
| 7 ZK688.3            | INSGDVIEFGLTDK  | 69  | 1578  | 0.47 | 0.19 | 40  |
| 1 ZK688.3            | INSGDVIEFGLTDK  | 31  | 954   | 0.61 | 0.18 | 30  |
| 22 ZK688.3           | INSGDVIEFGLTDK  | 71  | 2325  | 0.67 | 0.22 | 33  |
| 22 ZK688.3           | INSGDVIEFGLTDK  | 62  | 2190  | 0.68 | 0.14 | 20  |
| 1 ZK688.3            | DHALELGNAIPK    | 92  | 3892  | 0.69 | 0.11 | 16  |
| 22 ZK688.3           | INSGDVIEFGLTDK  | 31  | 1921  | 0.71 | 0.12 | 17  |
| 1 ZK688.3            | DHALELGNAIPK    | 95  | 5209  | 0.82 | 0.09 | 11  |
| 1 ZK688.3            | INSGDVIEFGLTDK  | 30  | 612   | 0.87 | 0.23 | 27  |
| 22 ZK688.3           | INSGDVIEFGLTDK  | 50  | 2113  | 0.93 | 0.23 | 24  |
| 22 ZK688.3           | DHALELGNAIPK    | 96  | 6684  | 0.94 | 0.11 | 12  |
| 22 ZK688.3           | DHALELGNAIPK    | 83  | 5546  | 1.06 | 0.07 | 6   |
| 10 ZK688.3           | DHALELGNAIPK    | 78  | 5651  | 1.19 | 0.07 | 6   |
| 7 ZK688.3            | DHALELGNAIPK    | 66  | 4511  | 1.26 | 0.10 | 8   |
| 10 ZK688.3           | DHALELGNAIPK    | 68  | 4704  | 1.36 | 0.09 | 7   |
| 7 ZK688.3            | DHALELGNAIPK    | 56  | 3741  | 1.38 | 0.08 | 6   |
| 22 ZK688.6b;ZK688.6a | AAVVVFVEHRFYGK  | 15  | 4898  | 0.51 | 0.12 | 24  |
| 22 ZK688.6b;ZK688.6a | GWIALDELAK      | 38  | 960   | 0.65 | 0.10 | 15  |
| 10 ZK688.6b;ZK688.6a | VQGSVISVILK     | 51  | 1247  | 0.74 | 0.12 | 16  |
| 10 ZK688.6b;ZK688.6a | GWIALDELAK      | 32  | 794   | 0.81 | 0.12 | 15  |
| 10 ZK688.6b;ZK688.6a | GWIALDELAK      | 13  | 782   | 0.87 | 0.10 | 11  |
| 1 ZK688.6b;ZK688.6a  | GWIALDELAK      | 11  | 370   | 0.94 | 0.13 | 13  |
| 10 ZK688.6b;ZK688.6a | GWIALDELAK      | 29  | 910   | 0.95 | 0.17 | 18  |
| 10 ZK688.6b;ZK688.6a | GWIALDELAK      | 25  | 1183  | 1.00 | 0.17 | 17  |
| 22 ZK688.6b;ZK688.6a | GWIALDELAK      | 37  | 955   | 1.00 | 0.16 | 15  |
| 22 ZK688.6b;ZK688.6a | VQGSVISVILK     | 55  | 847   | 1.03 | 0.10 | 10  |
| 1 ZK688.6b;ZK688.6a  | GWIALDELAK      | 10  | 422   | 1.28 | 0.13 | 10  |
| 10 ZK783.2           | LYAEWFAK        | 11  | 1040  | 0.87 | 0.17 | 19  |
| 10 ZK809.2           | SLVTSVSK        | 15  | 7786  | 9.27 | 0.33 | 4   |
| 10 ZK829.1           | IVLNGRSADDVEK   | 15  | 2819  | 3.63 | 0.66 | 18  |
| 7 ZK829.4            | MVDFYFNK        | 30  | 2108  | 0.04 | 0.36 | 948 |
| 7 ZK829.4            | MVDFYFNK        | 32  | 1090  | 0.07 | 0.18 | 266 |
| 7 ZK829.4            | LAEEK           | 20  | 5644  | 0.09 | 0.23 | 254 |
| 7 ZK829.4            | MVDFYFNK        | 28  | 1371  | 0.10 | 0.11 | 110 |
| 22 ZK829.4           | MVDFYFNK        | 37  | 7242  | 0.11 | 0.06 | 51  |
| 10 ZK829.4           | GAEVIAPK        | 38  | 14147 | 0.12 | 0.12 | 103 |
| 10 ZK829.4           | LAEEK           | 22  | 2387  | 0.12 | 0.59 | 492 |
| 22 ZK829.4           | MVDFYFNK        | 39  | 5140  | 0.14 | 0.16 | 111 |
| 22 ZK829.4           | NLVSGILGAIKPVNK | 54  | 2362  | 0.15 | 0.20 | 134 |
| 7 ZK829.4            | MVGLDTGLAGK     | 55  | 1474  | 0.17 | 0.46 | 269 |
| 10 ZK829.4           | GAEVIAPK        | 37  | 15460 | 0.17 | 0.22 | 130 |
| 10 ZK829.4           | LAEEK           | 19  | 2494  | 0.17 | 0.61 | 353 |
| 22 ZK829.4           | LAEEK           | 22  | 2386  | 0.18 | 0.30 | 169 |
| 7 ZK829.4            | MVGLDTGLAGK     | 59  | 1850  | 0.20 | 0.28 | 140 |
| 1 ZK829.4            | QYTDYIEK        | 37  | 1784  | 0.21 | 0.16 | 76  |
| 7 ZK829.4            | MLLASVQESLSK    | 65  | 1008  | 0.22 | 0.15 | 70  |
| 10 ZK829.4           | QYTDYIEK        | 25  | 1862  | 0.23 | 0.12 | 52  |
| 22 ZK829.4           | NLVSGILGAIKPVNK | 44  | 1548  | 0.24 | 0.27 | 110 |
| 7 ZK829.4            | MVGLDTGLAGK     | 47  | 1656  | 0.25 | 0.61 | 246 |
| 1 ZK829.4            | LAEEK           | 14  | 911   | 0.25 | 0.15 | 61  |
| 7 ZK829.4            | MVDFYFNK        | 30  | 2482  | 0.26 | 0.25 | 96  |
| 7 ZK829.4            | NLVSGILGAIKPVNK | 74  | 3446  | 0.26 | 0.23 | 88  |
| 7 ZK829.4            | MVDFYFNK        | 29  | 2649  | 0.26 | 0.12 | 47  |
| 1 ZK829.4            | QYTDYIEK        | 34  | 1489  | 0.26 | 0.21 | 81  |
| 7 ZK829.4            | MVGLDTGLAGK     | 57  | 2095  | 0.27 | 0.38 | 139 |
| 22 ZK829.4           | LAEEK           | 20  | 2321  | 0.27 | 0.28 | 102 |
| 7 ZK829.4            | NLVSGILGAIKPVNK | 63  | 3810  | 0.27 | 0.23 | 86  |
| 7 ZK829.4            | NLVSGILGAIKPVNK | 48  | 9536  | 0.27 | 0.08 | 29  |
| 7 ZK829.4            | MLLASVQESLSK    | 48  | 834   | 0.29 | 0.11 | 37  |
| 22 ZK829.4           | ITRRIAIEFAK     | 19  | 38321 | 0.30 | 0.12 | 39  |
| 22 ZK829.4           | ALSALMTYK       | 35  | 3014  | 0.31 | 0.36 | 115 |
| 22 ZK829.4           | ITRRIAIEFAK     | 17  | 34364 | 0.31 | 0.14 | 45  |
| 10 ZK829.4           | GAEVIAPK        | 29  | 6210  | 0.32 | 0.10 | 31  |
| 22 ZK829.4           | MVDFYFNK        | 29  | 1010  | 0.32 | 0.07 | 22  |
| 7 ZK829.4            | MVGLDTGLAGK     | 83  | 6772  | 0.32 | 0.15 | 46  |
| 22 ZK829.4           | GLEVFTNDADYMK   | 56  | 1820  | 0.33 | 0.09 | 28  |
| 7 ZK829.4            | GAEVIAPK        | 30  | 12162 | 0.33 | 0.11 | 34  |
| 22 ZK829.4           | NLVSGILGAIKPVNK | 61  | 2581  | 0.34 | 0.31 | 92  |
| 22 ZK829.4           | QYTDYIEK        | 34  | 2102  | 0.34 | 0.19 | 56  |
| 7 ZK829.4            | GAEVIAPK        | 46  | 21320 | 0.34 | 0.16 | 46  |
| 22 ZK829.4           | NLVSGILGAIKPVNK | 56  | 1674  | 0.35 | 0.50 | 142 |
| 22 ZK829.4           | LAEEK           | 30  | 1825  | 0.36 | 0.29 | 81  |
| 1 ZK829.4            | MVGLDTGLAGK     | 101 | 7061  | 0.36 | 0.12 | 32  |
| 22 ZK829.4           | ALSALMTYK       | 57  | 3423  | 0.36 | 0.28 | 78  |
| 10 ZK829.4           | QYTDYIEK        | 33  | 16657 | 0.36 | 0.05 | 13  |
| 10 ZK829.4           | ALSALMTYK       | 66  | 6513  | 0.36 | 0.35 | 96  |
| 22 ZK829.4           | MVDFYFNK        | 35  | 3219  | 0.36 | 0.04 | 12  |
| 7 ZK829.4            | DCPVEPNAAFAAK   | 30  | 4095  | 0.36 | 0.16 | 44  |
| 10 ZK829.4           | ALSALMTYK       | 78  | 5745  | 0.37 | 0.07 | 20  |
| 22 ZK829.4           | MVDFYFNK        | 56  | 4655  | 0.37 | 0.14 | 38  |
| 7 ZK829.4            | MVGLDTGLAGK     | 111 | 9133  | 0.37 | 0.20 | 53  |
| 22 ZK829.4           | NFDPFTELMYEK    | 23  | 1383  | 0.38 | 0.20 | 54  |
| 10 ZK829.4           | ALSALMTYK       | 61  | 6326  | 0.38 | 0.35 | 94  |
| 7 ZK829.4            | DCPVEPNAAFAAK   | 13  | 3650  | 0.38 | 0.11 | 29  |
| 22 ZK829.4           | ALSALMTYK       | 38  | 3177  | 0.38 | 0.13 | 33  |
| 22 ZK829.4           | QYTDYIEK        | 40  | 2026  | 0.38 | 0.17 | 45  |
| 7 ZK829.4            | ALSALMTYK       | 31  | 4255  | 0.39 | 0.03 | 8   |
| 22 ZK829.4           | NLVSGILGAIKPVNK | 28  | 2827  | 0.39 | 0.32 | 81  |
| 1 ZK829.4            | NLVSGILGAIKPVNK | 49  | 1363  | 0.39 | 0.19 | 50  |
| 1 ZK829.4            | NLVSGILGAIKPVNK | 28  | 357   | 0.39 | 0.31 | 79  |
| 7 ZK829.4            | LAEEK           | 20  | 4391  | 0.40 | 0.24 | 60  |
| 7 ZK829.4            | MVDFYFNK        | 17  | 764   | 0.40 | 0.33 | 82  |
| 22 ZK829.4           | NLVSGILGAIKPVNK | 33  | 1188  | 0.40 | 0.22 | 54  |
| 1 ZK829.4            | MVGLDTGLAGK     | 94  | 6790  | 0.40 | 0.09 | 23  |

|            |                      |     |        |      |      |     |
|------------|----------------------|-----|--------|------|------|-----|
| 7 ZK829.4  | MVGLDTGLAGK          | 57  | 1770   | 0.40 | 0.14 | 36  |
| 22 ZK829.4 | MVGLDTGLAGK          | 104 | 11021  | 0.40 | 0.16 | 40  |
| 7 ZK829.4  | MVDFYFNK             | 39  | 2566   | 0.41 | 0.10 | 23  |
| 1 ZK829.4  | MLLASVQESLSK         | 52  | 633    | 0.41 | 0.16 | 39  |
| 22 ZK829.4 | LAEEK                | 29  | 2025   | 0.42 | 0.26 | 63  |
| 10 ZK829.4 | QYTDYEIEK            | 36  | 13029  | 0.42 | 0.13 | 31  |
| 7 ZK829.4  | ALSALMTYK            | 43  | 14147  | 0.42 | 0.10 | 25  |
| 22 ZK829.4 | MVGLDTGLAGK          | 80  | 6479   | 0.42 | 0.06 | 14  |
| 22 ZK829.4 | QYTDYEIEK            | 37  | 1861   | 0.42 | 0.17 | 41  |
| 7 ZK829.4  | QYTDYEIEK            | 34  | 1155   | 0.43 | 0.07 | 17  |
| 22 ZK829.4 | MLLASVQESLSK         | 65  | 1114   | 0.43 | 0.16 | 37  |
| 1 ZK829.4  | ALSALMTYK            | 58  | 3196   | 0.43 | 0.13 | 31  |
| 22 ZK829.4 | NLVSGILGAIKPVNK      | 12  | 1533   | 0.43 | 0.39 | 92  |
| 10 ZK829.4 | MVGLDTGLAGK          | 34  | 4909   | 0.43 | 0.11 | 25  |
| 22 ZK829.4 | ALSALMTYK            | 69  | 6360   | 0.43 | 0.14 | 32  |
| 7 ZK829.4  | ALSALMTYK            | 78  | 7564   | 0.43 | 0.20 | 46  |
| 7 ZK829.4  | GAEVIAPK             | 23  | 2969   | 0.44 | 0.21 | 47  |
| 7 ZK829.4  | GGIRYSLDVCDEVK       | 37  | 1591   | 0.44 | 0.16 | 37  |
| 10 ZK829.4 | ALSALMTYK            | 53  | 2772   | 0.44 | 0.38 | 87  |
| 22 ZK829.4 | MVDFYFNK             | 31  | 2069   | 0.44 | 0.20 | 46  |
| 22 ZK829.4 | MVGLDTGLAGK          | 86  | 8829   | 0.44 | 0.14 | 32  |
| 22 ZK829.4 | MVGLDTGLAGK          | 108 | 17847  | 0.44 | 0.16 | 37  |
| 1 ZK829.4  | NFDPFTELMYEK         | 14  | 460    | 0.44 | 0.20 | 44  |
| 22 ZK829.4 | GLEVFTNDADYMK        | 55  | 1482   | 0.45 | 0.39 | 89  |
| 22 ZK829.4 | ALSALMTYK            | 62  | 27862  | 0.45 | 0.50 | 112 |
| 7 ZK829.4  | MVGLDTGLAGK          | 69  | 5303   | 0.45 | 0.21 | 47  |
| 1 ZK829.4  | NFDPFTELMYEK         | 24  | 700    | 0.45 | 0.17 | 38  |
| 7 ZK829.4  | NLVSGILGAIKPVNK      | 39  | 4042   | 0.45 | 0.15 | 34  |
| 7 ZK829.4  | MVDFYFNK             | 33  | 1494   | 0.45 | 0.12 | 26  |
| 7 ZK829.4  | ITRRIAIEFAK          | 26  | 22995  | 0.45 | 0.27 | 59  |
| 7 ZK829.4  | DCPVEPNAAFAAK        | 24  | 3295   | 0.45 | 0.15 | 32  |
| 22 ZK829.4 | MVDFYFNK             | 34  | 1221   | 0.46 | 0.26 | 57  |
| 22 ZK829.4 | VIGIQEYDCAVYNPDGIHPK | 38  | 5820   | 0.46 | 0.18 | 40  |
| 22 ZK829.4 | MVDFYFNK             | 48  | 2092   | 0.46 | 0.08 | 18  |
| 22 ZK829.4 | GLEVFTNDADYMK        | 83  | 6003   | 0.46 | 0.14 | 31  |
| 7 ZK829.4  | NLNHVSYGRLTFK        | 14  | 178618 | 0.46 | 0.27 | 59  |
| 7 ZK829.4  | DCPVEPNAAFAAK        | 21  | 3411   | 0.46 | 0.18 | 38  |
| 7 ZK829.4  | ALSALMTYK            | 61  | 6217   | 0.46 | 0.21 | 46  |
| 10 ZK829.4 | ALSALMTYK            | 32  | 2205   | 0.47 | 0.08 | 18  |
| 22 ZK829.4 | MVGLDTGLAGK          | 109 | 19171  | 0.47 | 0.11 | 23  |
| 7 ZK829.4  | DCPVEPNAAFAAK        | 21  | 4601   | 0.47 | 0.16 | 35  |
| 7 ZK829.4  | MVDFYFNK             | 29  | 5361   | 0.47 | 0.10 | 20  |
| 22 ZK829.4 | MVGLDTGLAGK          | 110 | 12494  | 0.47 | 0.26 | 55  |
| 7 ZK829.4  | MVGLDTGLAGK          | 89  | 8441   | 0.47 | 0.17 | 37  |
| 10 ZK829.4 | VIGIQEYDCAVYNPDGIHPK | 28  | 4023   | 0.48 | 0.07 | 15  |
| 22 ZK829.4 | ITRRIAIEFAK          | 17  | 10101  | 0.48 | 0.14 | 29  |
| 22 ZK829.4 | MVGLDTGLAGK          | 116 | 11350  | 0.48 | 0.15 | 32  |
| 7 ZK829.4  | NFDPFTELMYEK         | 28  | 748    | 0.48 | 0.21 | 43  |
| 1 ZK829.4  | MVDFYFNK             | 21  | 540    | 0.48 | 0.17 | 35  |
| 22 ZK829.4 | GLEVFTNDADYMK        | 92  | 6998   | 0.49 | 0.08 | 16  |
| 10 ZK829.4 | ALSALMTYK            | 53  | 1726   | 0.49 | 0.12 | 25  |
| 7 ZK829.4  | MVDFYFNK             | 21  | 1462   | 0.49 | 0.11 | 22  |
| 22 ZK829.4 | NLVSGILGAIKPVNK      | 27  | 5994   | 0.49 | 0.16 | 32  |
| 22 ZK829.4 | GLEVFTNDADYMK        | 75  | 1906   | 0.49 | 0.20 | 40  |
| 7 ZK829.4  | MVGLDTGLAGK          | 80  | 2894   | 0.50 | 0.12 | 25  |
| 22 ZK829.4 | ALSALMTYK            | 32  | 6171   | 0.50 | 0.11 | 22  |
| 22 ZK829.4 | ALSALMTYK            | 40  | 2502   | 0.50 | 0.33 | 66  |
| 10 ZK829.4 | ITRRIAIEFAK          | 12  | 1747   | 0.50 | 0.19 | 38  |
| 22 ZK829.4 | NLVSGILGAIKPVNK      | 42  | 3297   | 0.50 | 0.24 | 48  |
| 7 ZK829.4  | MVGLDTGLAGK          | 59  | 3588   | 0.50 | 0.43 | 86  |
| 10 ZK829.4 | ALSALMTYK            | 51  | 3449   | 0.50 | 0.04 | 9   |
| 1 ZK829.4  | ALSALMTYK            | 65  | 2717   | 0.50 | 0.15 | 31  |
| 1 ZK829.4  | MLLASVQESLSK         | 46  | 526    | 0.50 | 0.17 | 34  |
| 10 ZK829.4 | MVDFYFNK             | 42  | 1180   | 0.50 | 0.14 | 28  |
| 1 ZK829.4  | ALSALMTYK            | 69  | 2130   | 0.51 | 0.10 | 20  |
| 22 ZK829.4 | NLNHVSYGRLTFK        | 17  | 127482 | 0.51 | 0.24 | 46  |
| 7 ZK829.4  | MVDFYFNK             | 62  | 10155  | 0.51 | 0.22 | 44  |
| 1 ZK829.4  | NLVSGILGAIKPVNK      | 13  | 2073   | 0.51 | 0.39 | 77  |
| 7 ZK829.4  | ALSALMTYK            | 68  | 7813   | 0.51 | 0.24 | 46  |
| 22 ZK829.4 | NLVSGILGAIKPVNK      | 21  | 3194   | 0.51 | 0.26 | 50  |
| 7 ZK829.4  | MLLASVQESLSK         | 83  | 2200   | 0.52 | 0.15 | 29  |
| 7 ZK829.4  | GLEVFTNDADYMK        | 82  | 3861   | 0.52 | 0.06 | 12  |
| 7 ZK829.4  | GLEVFTNDADYMK        | 83  | 2603   | 0.52 | 0.18 | 34  |
| 1 ZK829.4  | ALSALMTYK            | 53  | 3154   | 0.52 | 0.15 | 30  |
| 22 ZK829.4 | NFDPFTELMYEK         | 40  | 2258   | 0.52 | 0.04 | 9   |
| 22 ZK829.4 | MVDFYFNK             | 37  | 2133   | 0.52 | 0.11 | 22  |
| 22 ZK829.4 | ITRRIAIEFAK          | 13  | 8199   | 0.52 | 0.28 | 54  |
| 7 ZK829.4  | VIGIQEYDCAVYNPDGIHPK | 44  | 2861   | 0.52 | 0.24 | 46  |
| 7 ZK829.4  | DCPVEPNAAFAAK        | 20  | 2476   | 0.52 | 0.11 | 20  |
| 22 ZK829.4 | GAEVIAPK             | 55  | 20723  | 0.52 | 0.11 | 21  |
| 22 ZK829.4 | GLEVFTNDADYMK        | 61  | 3018   | 0.52 | 0.17 | 32  |
| 7 ZK829.4  | MVGLDTGLAGK          | 98  | 2460   | 0.52 | 0.23 | 44  |
| 7 ZK829.4  | MVDFYFNK             | 34  | 3060   | 0.52 | 0.08 | 15  |
| 7 ZK829.4  | MVGLDTGLAGK          | 80  | 7637   | 0.53 | 0.21 | 39  |
| 10 ZK829.4 | MVDFYFNK             | 26  | 1288   | 0.53 | 0.11 | 21  |
| 7 ZK829.4  | MVGLDTGLAGK          | 70  | 3632   | 0.53 | 0.19 | 36  |
| 7 ZK829.4  | ALSALMTYK            | 90  | 5339   | 0.53 | 0.10 | 20  |
| 1 ZK829.4  | MLLASVQESLSK         | 29  | 370    | 0.53 | 0.26 | 50  |
| 7 ZK829.4  | ITRRIAIEFAK          | 11  | 5290   | 0.53 | 0.32 | 60  |
| 7 ZK829.4  | MLLASVQESLSK         | 43  | 678    | 0.53 | 0.08 | 16  |
| 7 ZK829.4  | MVDFYFNK             | 18  | 1164   | 0.53 | 0.12 | 23  |
| 22 ZK829.4 | MLLASVQESLSK         | 31  | 634    | 0.53 | 0.34 | 64  |
| 1 ZK829.4  | MLLASVQESLSK         | 42  | 648    | 0.54 | 0.27 | 50  |
| 7 ZK829.4  | MLLASVQESLSK         | 75  | 1791   | 0.54 | 0.15 | 29  |
| 7 ZK829.4  | DCPVEPNAAFAAK        | 13  | 2645   | 0.54 | 0.15 | 27  |
| 1 ZK829.4  | MVDFYFNK             | 15  | 568    | 0.54 | 0.17 | 31  |
| 7 ZK829.4  | GGIRYSLDVCDEVK       | 35  | 1691   | 0.54 | 0.15 | 28  |
| 1 ZK829.4  | MLLASVQESLSK         | 42  | 549    | 0.54 | 0.19 | 36  |
| 22 ZK829.4 | MVDFYFNK             | 31  | 1063   | 0.54 | 0.14 | 25  |
| 10 ZK829.4 | ALSALMTYK            | 61  | 10694  | 0.54 | 0.06 | 11  |
| 10 ZK829.4 | MVDFYFNK             | 23  | 1170   | 0.54 | 0.09 | 16  |

|            |                          |     |        |      |      |    |
|------------|--------------------------|-----|--------|------|------|----|
| 1 ZK829.4  | GLEVFTNDADYMK            | 32  | 1235   | 0.54 | 0.08 | 15 |
| 22 ZK829.4 | GLEVFTNDADYMK            | 52  | 2391   | 0.54 | 0.23 | 41 |
| 1 ZK829.4  | MVDFYFNK                 | 22  | 281    | 0.54 | 0.13 | 23 |
| 10 ZK829.4 | MLLASVQESLSK             | 34  | 995    | 0.55 | 0.21 | 38 |
| 10 ZK829.4 | NFDPFTELMYEK             | 27  | 1166   | 0.55 | 0.10 | 18 |
| 7 ZK829.4  | VIGIQEYDCAVYNPDGIHPK     | 39  | 4102   | 0.55 | 0.20 | 37 |
| 22 ZK829.4 | GLEVFTNDADYMK            | 71  | 5985   | 0.55 | 0.07 | 12 |
| 1 ZK829.4  | ALSALMTYK                | 72  | 9835   | 0.55 | 0.10 | 18 |
| 7 ZK829.4  | ALSALMTYK                | 42  | 1709   | 0.55 | 0.11 | 20 |
| 7 ZK829.4  | NLVSGILGAIKPVNK          | 67  | 3087   | 0.55 | 0.21 | 39 |
| 10 ZK829.4 | ITRRIAIEFAK              | 17  | 24870  | 0.55 | 0.08 | 14 |
| 1 ZK829.4  | MVGLDTGLAGK              | 46  | 2135   | 0.56 | 0.14 | 24 |
| 22 ZK829.4 | MVDFYFNK                 | 46  | 1441   | 0.56 | 0.29 | 52 |
| 22 ZK829.4 | ALSALMTYK                | 83  | 7554   | 0.56 | 0.09 | 16 |
| 22 ZK829.4 | ALSALMTYK                | 53  | 2506   | 0.56 | 0.09 | 15 |
| 7 ZK829.4  | MVGLDTGLAGK              | 61  | 1978   | 0.56 | 0.20 | 35 |
| 1 ZK829.4  | ALSALMTYK                | 43  | 1493   | 0.57 | 0.21 | 37 |
| 22 ZK829.4 | ALSALMTYK                | 38  | 5884   | 0.57 | 0.07 | 12 |
| 1 ZK829.4  | GLEVFTNDADYMK            | 26  | 925    | 0.57 | 0.15 | 26 |
| 10 ZK829.4 | MVGLDTGLAGK              | 93  | 16634  | 0.57 | 0.10 | 17 |
| 10 ZK829.4 | ALSALMTYK                | 64  | 4702   | 0.57 | 0.14 | 24 |
| 1 ZK829.4  | ALSALMTYK                | 34  | 1272   | 0.57 | 0.09 | 16 |
| 7 ZK829.4  | GLEVFTNDADYMK            | 78  | 3512   | 0.57 | 0.12 | 22 |
| 10 ZK829.4 | MVDFYFNK                 | 38  | 1424   | 0.57 | 0.15 | 27 |
| 22 ZK829.4 | NLVSGILGAIKPVNK          | 17  | 5349   | 0.57 | 0.12 | 21 |
| 1 ZK829.4  | GLEVFTNDADYMK            | 65  | 1646   | 0.57 | 0.14 | 24 |
| 22 ZK829.4 | MVDFYFNK                 | 42  | 1531   | 0.58 | 0.18 | 31 |
| 7 ZK829.4  | MVDFYFNK                 | 27  | 1597   | 0.58 | 0.14 | 23 |
| 10 ZK829.4 | ALSALMTYK                | 74  | 10347  | 0.58 | 0.16 | 27 |
| 7 ZK829.4  | MVDFYFNK                 | 23  | 695    | 0.58 | 0.12 | 21 |
| 1 ZK829.4  | MVDFYFNK                 | 24  | 620    | 0.59 | 0.13 | 22 |
| 22 ZK829.4 | MVGLDTGLAGK              | 74  | 4546   | 0.59 | 0.21 | 36 |
| 22 ZK829.4 | VIGIQEYDCAVYNPDGIHPK     | 16  | 2495   | 0.59 | 0.12 | 20 |
| 10 ZK829.4 | ALSALMTYK                | 73  | 8611   | 0.59 | 0.06 | 10 |
| 22 ZK829.4 | GAEVIAPK                 | 18  | 11997  | 0.59 | 0.12 | 20 |
| 22 ZK829.4 | ALSALMTYK                | 45  | 7145   | 0.59 | 0.37 | 62 |
| 22 ZK829.4 | ITRRIAIEFAK              | 17  | 24902  | 0.59 | 0.12 | 20 |
| 22 ZK829.4 | NFDPFTELMYEK             | 39  | 2974   | 0.59 | 0.16 | 26 |
| 7 ZK829.4  | NFDPFTELMYEK             | 35  | 891    | 0.60 | 0.19 | 31 |
| 22 ZK829.4 | VIGIQEYDCAVYNPDGIHPK     | 49  | 7663   | 0.60 | 0.32 | 54 |
| 10 ZK829.4 | MVDFYFNK                 | 44  | 2954   | 0.60 | 0.08 | 13 |
| 1 ZK829.4  | NLVSGILGAIKPVNK          | 24  | 1817   | 0.60 | 0.08 | 14 |
| 1 ZK829.4  | GLEVFTNDADYMK            | 48  | 1537   | 0.61 | 0.11 | 18 |
| 7 ZK829.4  | MVGLDTGLAGK              | 117 | 13887  | 0.61 | 0.16 | 27 |
| 10 ZK829.4 | ALSALMTYK                | 73  | 10257  | 0.61 | 0.12 | 20 |
| 22 ZK829.4 | GLEVFTNDADYMK            | 84  | 6156   | 0.61 | 0.07 | 11 |
| 10 ZK829.4 | NLVSGILGAIKPVNK          | 43  | 1187   | 0.61 | 0.12 | 19 |
| 7 ZK829.4  | MVGLDTGLAGK              | 93  | 17468  | 0.61 | 0.15 | 24 |
| 10 ZK829.4 | MVDFYFNK                 | 44  | 1765   | 0.62 | 0.18 | 30 |
| 1 ZK829.4  | ALSALMTYK                | 37  | 2110   | 0.62 | 0.16 | 26 |
| 22 ZK829.4 | VIGIQEYDCAVYNPDGIHPK     | 26  | 3585   | 0.62 | 0.19 | 31 |
| 10 ZK829.4 | ALSALMTYK                | 77  | 4809   | 0.62 | 0.07 | 11 |
| 7 ZK829.4  | NLNHVSYGRLTFK            | 53  | 1831   | 0.62 | 0.25 | 40 |
| 22 ZK829.4 | GAEVIAPK                 | 20  | 1681   | 0.62 | 0.13 | 20 |
| 7 ZK829.4  | ALSALMTYK                | 41  | 4057   | 0.63 | 0.12 | 18 |
| 7 ZK829.4  | MVDFYFNK                 | 28  | 885    | 0.63 | 0.18 | 29 |
| 10 ZK829.4 | MVDFYFNK                 | 28  | 987    | 0.63 | 0.14 | 23 |
| 1 ZK829.4  | ALSALMTYK                | 42  | 1625   | 0.63 | 0.09 | 14 |
| 10 ZK829.4 | MLLASVQESLSK             | 26  | 933    | 0.63 | 0.23 | 37 |
| 22 ZK829.4 | ALSALMTYK                | 51  | 3028   | 0.63 | 0.44 | 70 |
| 7 ZK829.4  | MVGLDTGLAGK              | 80  | 8468   | 0.63 | 0.18 | 29 |
| 10 ZK829.4 | GLEVFTNDADYMK            | 57  | 3332   | 0.63 | 0.08 | 13 |
| 7 ZK829.4  | MVDFYFNK                 | 29  | 1497   | 0.63 | 0.06 | 9  |
| 22 ZK829.4 | NLNHVSYGRLTFK            | 10  | 16100  | 0.64 | 0.31 | 49 |
| 1 ZK829.4  | MVGLDTGLAGK              | 69  | 4611   | 0.64 | 0.14 | 22 |
| 1 ZK829.4  | DIVHSGLEYTMQRSGEAIIRTAHK | 14  | 2813   | 0.64 | 0.09 | 15 |
| 1 ZK829.4  | ALSALMTYK                | 29  | 1295   | 0.64 | 0.11 | 17 |
| 22 ZK829.4 | ALSALMTYK                | 62  | 3502   | 0.64 | 0.11 | 17 |
| 10 ZK829.4 | MVDFYFNK                 | 47  | 2862   | 0.64 | 0.08 | 13 |
| 1 ZK829.4  | ALSALMTYK                | 73  | 11680  | 0.64 | 0.08 | 12 |
| 7 ZK829.4  | MVGLDTGLAGK              | 110 | 16997  | 0.64 | 0.14 | 22 |
| 22 ZK829.4 | GAEVIAPK                 | 20  | 2414   | 0.65 | 0.08 | 13 |
| 10 ZK829.4 | MVDFYFNK                 | 13  | 482    | 0.65 | 0.25 | 39 |
| 7 ZK829.4  | ALSALMTYK                | 77  | 7332   | 0.65 | 0.12 | 19 |
| 22 ZK829.4 | ALSALMTYK                | 49  | 3450   | 0.65 | 0.12 | 18 |
| 10 ZK829.4 | GLEVFTNDADYMK            | 66  | 2725   | 0.65 | 0.17 | 26 |
| 7 ZK829.4  | ALSALMTYK                | 28  | 10095  | 0.65 | 0.10 | 15 |
| 10 ZK829.4 | ALSALMTYK                | 69  | 13677  | 0.65 | 0.05 | 7  |
| 7 ZK829.4  | GAEVIAPK                 | 25  | 6578   | 0.65 | 0.23 | 35 |
| 1 ZK829.4  | MVGLDTGLAGK              | 94  | 7040   | 0.65 | 0.08 | 12 |
| 7 ZK829.4  | NLVSGILGAIKPVNK          | 32  | 7688   | 0.65 | 0.27 | 42 |
| 1 ZK829.4  | MLLASVQESLSK             | 63  | 1094   | 0.66 | 0.12 | 18 |
| 7 ZK829.4  | ALSALMTYK                | 25  | 1022   | 0.66 | 0.16 | 25 |
| 10 ZK829.4 | MVGLDTGLAGK              | 101 | 14223  | 0.66 | 0.11 | 17 |
| 7 ZK829.4  | MLLASVQESLSK             | 94  | 9546   | 0.66 | 0.12 | 19 |
| 7 ZK829.4  | NLNHVSYGRLTFK            | 18  | 167644 | 0.66 | 0.07 | 10 |
| 7 ZK829.4  | ALSALMTYK                | 59  | 2928   | 0.66 | 0.19 | 29 |
| 7 ZK829.4  | VIGIQEYDCAVYNPDGIHPK     | 34  | 10648  | 0.66 | 0.11 | 16 |
| 7 ZK829.4  | MLLASVQESLSK             | 31  | 802    | 0.66 | 0.26 | 39 |
| 10 ZK829.4 | MLLASVQESLSK             | 93  | 9980   | 0.66 | 0.11 | 17 |
| 7 ZK829.4  | ALSALMTYK                | 60  | 2623   | 0.66 | 0.12 | 18 |
| 10 ZK829.4 | MVDFYFNK                 | 34  | 933    | 0.66 | 0.12 | 18 |
| 10 ZK829.4 | MVGLDTGLAGK              | 36  | 7582   | 0.66 | 0.19 | 28 |
| 7 ZK829.4  | MVGLDTGLAGK              | 74  | 6581   | 0.67 | 0.16 | 24 |
| 22 ZK829.4 | GLEVFTNDADYMK            | 76  | 2385   | 0.67 | 0.11 | 17 |
| 22 ZK829.4 | ALSALMTYK                | 62  | 25030  | 0.67 | 0.12 | 18 |
| 10 ZK829.4 | MVGLDTGLAGK              | 33  | 3688   | 0.67 | 0.10 | 15 |
| 7 ZK829.4  | MVDFYFNK                 | 36  | 2774   | 0.67 | 0.15 | 22 |
| 10 ZK829.4 | ALSALMTYK                | 74  | 8755   | 0.67 | 0.09 | 14 |
| 10 ZK829.4 | MVGLDTGLAGK              | 31  | 3198   | 0.67 | 0.21 | 31 |
| 1 ZK829.4  | ALSALMTYK                | 53  | 2717   | 0.67 | 0.16 | 24 |

|            |                    |     |        |      |      |    |
|------------|--------------------|-----|--------|------|------|----|
| 22 ZK829.4 | ITRRIAIEFAK        | 22  | 20671  | 0.67 | 0.14 | 21 |
| 1 ZK829.4  | MVDFYFNK           | 11  | 316    | 0.67 | 0.27 | 39 |
| 10 ZK829.4 | NFDPFTELMYEK       | 20  | 408    | 0.68 | 0.27 | 40 |
| 7 ZK829.4  | MVDFYFNK           | 35  | 1182   | 0.68 | 0.15 | 22 |
| 7 ZK829.4  | MVGLDTGLAGK        | 57  | 4185   | 0.68 | 0.16 | 24 |
| 1 ZK829.4  | MVGLDTGLAGK        | 103 | 9126   | 0.69 | 0.07 | 10 |
| 1 ZK829.4  | NFDPFTELMYEK       | 60  | 1635   | 0.69 | 0.26 | 38 |
| 1 ZK829.4  | MLLASVQESLSK       | 64  | 1562   | 0.69 | 0.18 | 26 |
| 7 ZK829.4  | GLEVFTNDADYMK      | 35  | 1285   | 0.69 | 0.23 | 34 |
| 10 ZK829.4 | MVDFYFNK           | 17  | 942    | 0.69 | 0.09 | 12 |
| 7 ZK829.4  | MLLASVQESLSK       | 44  | 878    | 0.69 | 0.22 | 32 |
| 10 ZK829.4 | MVDFYFNK           | 10  | 289    | 0.69 | 0.12 | 18 |
| 7 ZK829.4  | ALSALMTYK          | 37  | 4492   | 0.70 | 0.07 | 10 |
| 10 ZK829.4 | ALSALMTYK          | 68  | 12494  | 0.70 | 0.10 | 14 |
| 7 ZK829.4  | ALSALMTYK          | 42  | 3200   | 0.70 | 0.02 | 3  |
| 1 ZK829.4  | QYTDYIEK           | 38  | 5976   | 0.70 | 0.17 | 24 |
| 10 ZK829.4 | MVGLDTGLAGK        | 71  | 4342   | 0.70 | 0.11 | 15 |
| 22 ZK829.4 | MLLASVQESLSK       | 54  | 982    | 0.70 | 0.12 | 17 |
| 1 ZK829.4  | MLLASVQESLSK       | 28  | 458    | 0.71 | 0.16 | 23 |
| 10 ZK829.4 | MVDFYFNK           | 37  | 2829   | 0.71 | 0.11 | 15 |
| 22 ZK829.4 | LAELK              | 25  | 797    | 0.71 | 0.17 | 24 |
| 22 ZK829.4 | MVGLDTGLAGK        | 77  | 4407   | 0.71 | 0.26 | 36 |
| 7 ZK829.4  | MVGLDTGLAGK        | 18  | 1082   | 0.71 | 0.15 | 21 |
| 22 ZK829.4 | MVDFYFNK           | 36  | 2311   | 0.71 | 0.13 | 18 |
| 1 ZK829.4  | NFDPFTELMYEK       | 26  | 876    | 0.71 | 0.18 | 25 |
| 7 ZK829.4  | MVDFYFNK           | 42  | 4046   | 0.71 | 0.07 | 10 |
| 1 ZK829.4  | MVGLDTGLAGK        | 17  | 2125   | 0.71 | 0.14 | 20 |
| 7 ZK829.4  | MVGLDTGLAGK        | 64  | 2588   | 0.71 | 0.11 | 15 |
| 22 ZK829.4 | MVDFYFNK           | 51  | 1075   | 0.71 | 0.15 | 21 |
| 7 ZK829.4  | MVGLDTGLAGK        | 75  | 8060   | 0.71 | 0.19 | 27 |
| 1 ZK829.4  | MVDFYFNK           | 33  | 3443   | 0.72 | 0.06 | 9  |
| 10 ZK829.4 | GLEVFTNDADYMK      | 77  | 5037   | 0.72 | 0.16 | 23 |
| 22 ZK829.4 | DCPVEPNAAFAAK      | 25  | 2228   | 0.72 | 0.11 | 15 |
| 10 ZK829.4 | ITRRIAIEFAK        | 14  | 2920   | 0.72 | 0.29 | 40 |
| 1 ZK829.4  | NLNHVSYGRLTFK      | 14  | 12744  | 0.72 | 0.15 | 21 |
| 10 ZK829.4 | GLEVFTNDADYMK      | 97  | 11038  | 0.72 | 0.07 | 9  |
| 22 ZK829.4 | MVDFYFNK           | 47  | 4903   | 0.72 | 0.07 | 10 |
| 22 ZK829.4 | CAVVDPFPGGAK       | 31  | 1530   | 0.72 | 0.15 | 21 |
| 22 ZK829.4 | MVGLDTGLAGK        | 60  | 7141   | 0.72 | 0.11 | 16 |
| 22 ZK829.4 | QYTDYIEK           | 45  | 1432   | 0.73 | 0.19 | 27 |
| 22 ZK829.4 | ALSALMTYK          | 67  | 4424   | 0.73 | 0.13 | 17 |
| 22 ZK829.4 | NLVSGILGAIKPVNK    | 61  | 1688   | 0.73 | 0.29 | 40 |
| 1 ZK829.4  | MLLASVQESLSK       | 88  | 1819   | 0.73 | 0.12 | 17 |
| 10 ZK829.4 | MVGLDTGLAGK        | 85  | 6033   | 0.73 | 0.19 | 26 |
| 7 ZK829.4  | ALSALMTYK          | 68  | 10476  | 0.74 | 0.09 | 12 |
| 7 ZK829.4  | ITRRIAIEFAK        | 11  | 3044   | 0.74 | 0.14 | 19 |
| 7 ZK829.4  | YNLGLDIRTAAYANSIEK | 26  | 1772   | 0.74 | 0.17 | 23 |
| 7 ZK829.4  | MLLASVQESLSK       | 83  | 8281   | 0.74 | 0.10 | 13 |
| 7 ZK829.4  | MVGLDTGLAGK        | 77  | 3958   | 0.74 | 0.11 | 14 |
| 1 ZK829.4  | ITRRIAIEFAK        | 23  | 2228   | 0.74 | 0.18 | 25 |
| 7 ZK829.4  | MLLASVQESLSK       | 44  | 985    | 0.74 | 0.24 | 33 |
| 10 ZK829.4 | NLNHVSYGRLTFK      | 12  | 24502  | 0.74 | 0.33 | 44 |
| 7 ZK829.4  | MVGLDTGLAGK        | 84  | 5226   | 0.74 | 0.30 | 41 |
| 1 ZK829.4  | GLEVFTNDADYMK      | 63  | 2438   | 0.74 | 0.18 | 24 |
| 22 ZK829.4 | NLNHVSYGRLTFK      | 21  | 101327 | 0.75 | 0.27 | 36 |
| 10 ZK829.4 | NLVSGILGAIKPVNK    | 32  | 2027   | 0.75 | 0.45 | 60 |
| 7 ZK829.4  | LAELK              | 22  | 2096   | 0.75 | 0.16 | 22 |
| 22 ZK829.4 | NLVSGILGAIKPVNK    | 23  | 2059   | 0.75 | 0.18 | 24 |
| 10 ZK829.4 | MVDFYFNK           | 39  | 11194  | 0.75 | 0.09 | 12 |
| 22 ZK829.4 | MVGLDTGLAGK        | 74  | 11554  | 0.75 | 0.12 | 17 |
| 7 ZK829.4  | MVDFYFNK           | 22  | 761    | 0.75 | 0.06 | 8  |
| 7 ZK829.4  | MVDFYFNK           | 27  | 5033   | 0.75 | 0.10 | 14 |
| 22 ZK829.4 | NLVSGILGAIKPVNK    | 43  | 3022   | 0.75 | 0.08 | 11 |
| 22 ZK829.4 | NLVSGILGAIKPVNK    | 39  | 1123   | 0.75 | 0.34 | 45 |
| 10 ZK829.4 | ALSALMTYK          | 30  | 2795   | 0.76 | 0.18 | 24 |
| 22 ZK829.4 | MLLASVQESLSK       | 17  | 932    | 0.76 | 0.09 | 12 |
| 7 ZK829.4  | NFDPFTELMYEK       | 22  | 2361   | 0.76 | 0.20 | 27 |
| 22 ZK829.4 | MVDFYFNK           | 44  | 3658   | 0.76 | 0.07 | 9  |
| 7 ZK829.4  | MVDFYFNK           | 55  | 7573   | 0.76 | 0.07 | 9  |
| 7 ZK829.4  | GLEVFTNDADYMK      | 54  | 3000   | 0.76 | 0.17 | 22 |
| 10 ZK829.4 | QYTDYIEK           | 10  | 760    | 0.76 | 0.16 | 21 |
| 22 ZK829.4 | ALSALMTYK          | 74  | 10938  | 0.76 | 0.04 | 6  |
| 7 ZK829.4  | GGIRYSLDVCDEVK     | 44  | 1915   | 0.76 | 0.09 | 11 |
| 7 ZK829.4  | ALSALMTYK          | 36  | 2292   | 0.77 | 0.17 | 23 |
| 1 ZK829.4  | DCPVEPNAAFAAK      | 15  | 1864   | 0.77 | 0.10 | 14 |
| 22 ZK829.4 | NLVSGILGAIKPVNK    | 56  | 2434   | 0.77 | 0.41 | 54 |
| 7 ZK829.4  | MVDFYFNK           | 48  | 9235   | 0.77 | 0.06 | 7  |
| 1 ZK829.4  | GLEVFTNDADYMK      | 64  | 2318   | 0.77 | 0.17 | 22 |
| 7 ZK829.4  | MLLASVQESLSK       | 35  | 884    | 0.77 | 0.11 | 14 |
| 10 ZK829.4 | MVDFYFNK           | 11  | 904    | 0.77 | 0.09 | 12 |
| 1 ZK829.4  | DCPVEPNAAFAAK      | 13  | 2355   | 0.78 | 0.07 | 9  |
| 1 ZK829.4  | MVDFYFNK           | 25  | 2576   | 0.78 | 0.06 | 7  |
| 7 ZK829.4  | ALSALMTYK          | 42  | 2389   | 0.78 | 0.18 | 23 |
| 1 ZK829.4  | MVDFYFNK           | 22  | 367    | 0.78 | 0.23 | 29 |
| 22 ZK829.4 | NFDPFTELMYEK       | 23  | 1542   | 0.78 | 0.24 | 31 |
| 7 ZK829.4  | GAEVIAPK           | 10  | 1366   | 0.78 | 0.09 | 12 |
| 1 ZK829.4  | ALSALMTYK          | 13  | 529    | 0.78 | 0.16 | 20 |
| 7 ZK829.4  | NLNHVSYGRLTFK      | 13  | 20477  | 0.78 | 0.22 | 28 |
| 7 ZK829.4  | NFDPFTELMYEK       | 28  | 1284   | 0.79 | 0.18 | 22 |
| 1 ZK829.4  | ALSALMTYK          | 53  | 1655   | 0.79 | 0.20 | 25 |
| 10 ZK829.4 | ALSALMTYK          | 30  | 3355   | 0.79 | 0.12 | 15 |
| 10 ZK829.4 | GLEVFTNDADYMK      | 50  | 1224   | 0.79 | 0.18 | 23 |
| 7 ZK829.4  | ALSALMTYK          | 56  | 4142   | 0.79 | 0.10 | 13 |
| 10 ZK829.4 | ITRRIAIEFAK        | 12  | 22014  | 0.79 | 0.23 | 29 |
| 10 ZK829.4 | MVDFYFNK           | 11  | 342    | 0.79 | 0.10 | 13 |
| 7 ZK829.4  | ALSALMTYK          | 56  | 3179   | 0.79 | 0.15 | 19 |
| 10 ZK829.4 | ALSALMTYK          | 84  | 5105   | 0.79 | 0.10 | 13 |
| 22 ZK829.4 | GLEVFTNDADYMK      | 66  | 2278   | 0.79 | 0.10 | 13 |
| 7 ZK829.4  | GLEVFTNDADYMK      | 74  | 6692   | 0.79 | 0.08 | 10 |
| 22 ZK829.4 | ITRRIAIEFAK        | 14  | 1789   | 0.79 | 0.12 | 15 |
| 7 ZK829.4  | NLNHVSYGRLTFK      | 42  | 2812   | 0.79 | 0.17 | 21 |

|            |                          |     |       |      |      |    |
|------------|--------------------------|-----|-------|------|------|----|
| 10 ZK829.4 | MVGLDTGLAGK              | 94  | 4830  | 0.80 | 0.19 | 24 |
| 1 ZK829.4  | ALSALMTYK                | 29  | 1862  | 0.80 | 0.18 | 23 |
| 22 ZK829.4 | GLEVFTNDADYMK            | 36  | 2233  | 0.80 | 0.14 | 17 |
| 10 ZK829.4 | MVDFYFNK                 | 40  | 1480  | 0.80 | 0.09 | 12 |
| 22 ZK829.4 | MVDFYFNK                 | 16  | 1402  | 0.80 | 0.17 | 21 |
| 1 ZK829.4  | DIVHSGLEYTMQRSGEAIIRTAHK | 13  | 3175  | 0.80 | 0.22 | 27 |
| 22 ZK829.4 | ALSALMTYK                | 48  | 2947  | 0.80 | 0.07 | 9  |
| 22 ZK829.4 | MLLASVQESLSK             | 63  | 1859  | 0.80 | 0.18 | 23 |
| 7 ZK829.4  | MVDFYFNK                 | 18  | 1091  | 0.81 | 0.16 | 20 |
| 1 ZK829.4  | ALSALMTYK                | 48  | 2213  | 0.81 | 0.21 | 27 |
| 1 ZK829.4  | MVDFYFNK                 | 24  | 337   | 0.81 | 0.16 | 20 |
| 10 ZK829.4 | GLEVFTNDADYMK            | 102 | 18439 | 0.81 | 0.06 | 7  |
| 1 ZK829.4  | GLEVFTNDADYMK            | 61  | 2400  | 0.81 | 0.13 | 16 |
| 10 ZK829.4 | ALSALMTYK                | 47  | 3666  | 0.81 | 0.08 | 10 |
| 22 ZK829.4 | ALSALMTYK                | 17  | 2024  | 0.81 | 0.22 | 27 |
| 22 ZK829.4 | NLVSGILGAIKPVNK          | 58  | 2612  | 0.81 | 0.22 | 27 |
| 22 ZK829.4 | NFDPFTELMYEK             | 44  | 1562  | 0.81 | 0.10 | 13 |
| 22 ZK829.4 | ALSALMTYK                | 77  | 6883  | 0.82 | 0.08 | 10 |
| 7 ZK829.4  | VIGIQEYDCAVYNPDGIHPK     | 33  | 12027 | 0.82 | 0.21 | 25 |
| 22 ZK829.4 | DIVHSGLEYTMQRSGEAIIRTAHK | 14  | 6267  | 0.82 | 0.25 | 30 |
| 22 ZK829.4 | ALSALMTYK                | 66  | 3482  | 0.82 | 0.06 | 7  |
| 22 ZK829.4 | MVGLDTGLAGK              | 50  | 7481  | 0.82 | 0.13 | 16 |
| 10 ZK829.4 | ALSALMTYK                | 40  | 2740  | 0.82 | 0.42 | 51 |
| 1 ZK829.4  | MVDFYFNK                 | 16  | 421   | 0.83 | 0.14 | 17 |
| 10 ZK829.4 | NLVSGILGAIKPVNK          | 26  | 1978  | 0.83 | 0.27 | 33 |
| 10 ZK829.4 | GLEVFTNDADYMK            | 46  | 1589  | 0.83 | 0.19 | 23 |
| 22 ZK829.4 | ITRRIAIEFAK              | 11  | 3021  | 0.83 | 0.21 | 26 |
| 22 ZK829.4 | ALSALMTYK                | 40  | 6066  | 0.83 | 0.10 | 12 |
| 1 ZK829.4  | MVGLDTGLAGK              | 68  | 4838  | 0.83 | 0.10 | 12 |
| 1 ZK829.4  | MLLASVQESLSK             | 44  | 400   | 0.83 | 0.31 | 37 |
| 10 ZK829.4 | MVDFYFNK                 | 42  | 8246  | 0.83 | 0.10 | 12 |
| 7 ZK829.4  | MVDFYFNK                 | 42  | 2305  | 0.84 | 0.08 | 9  |
| 22 ZK829.4 | ALSALMTYK                | 50  | 3502  | 0.84 | 0.27 | 32 |
| 22 ZK829.4 | GLEVFTNDADYMK            | 54  | 2678  | 0.84 | 0.12 | 14 |
| 1 ZK829.4  | ALSALMTYK                | 60  | 1744  | 0.84 | 0.21 | 25 |
| 7 ZK829.4  | MLLASVQESLSK             | 44  | 971   | 0.84 | 0.29 | 34 |
| 7 ZK829.4  | MVDFYFNK                 | 23  | 868   | 0.84 | 0.16 | 19 |
| 7 ZK829.4  | MLLASVQESLSK             | 45  | 940   | 0.84 | 0.14 | 16 |
| 1 ZK829.4  | ALSALMTYK                | 17  | 681   | 0.85 | 0.14 | 17 |
| 10 ZK829.4 | ALSALMTYK                | 40  | 2408  | 0.85 | 0.12 | 14 |
| 22 ZK829.4 | ALSALMTYK                | 42  | 5208  | 0.85 | 0.07 | 8  |
| 22 ZK829.4 | VIGIQEYDCAVYNPDGIHPK     | 23  | 9525  | 0.85 | 0.15 | 18 |
| 1 ZK829.4  | MVGLDTGLAGK              | 77  | 6134  | 0.85 | 0.11 | 13 |
| 7 ZK829.4  | GGIRYSLDVCDEVK           | 55  | 1881  | 0.85 | 0.13 | 16 |
| 7 ZK829.4  | MVGLDTGLAGK              | 73  | 4290  | 0.85 | 0.15 | 18 |
| 22 ZK829.4 | GLEVFTNDADYMK            | 92  | 9240  | 0.85 | 0.10 | 12 |
| 7 ZK829.4  | ALSALMTYK                | 60  | 15256 | 0.85 | 0.08 | 9  |
| 22 ZK829.4 | MVDFYFNK                 | 41  | 9013  | 0.85 | 0.03 | 4  |
| 22 ZK829.4 | GLEVFTNDADYMK            | 59  | 1672  | 0.86 | 0.12 | 15 |
| 22 ZK829.4 | ITRRIAIEFAK              | 31  | 4590  | 0.86 | 0.07 | 9  |
| 10 ZK829.4 | MVDFYFNK                 | 23  | 1402  | 0.86 | 0.16 | 19 |
| 7 ZK829.4  | NLVSGILGAIKPVNK          | 39  | 2282  | 0.86 | 0.24 | 28 |
| 7 ZK829.4  | NLNHVSYGRLTFK            | 43  | 1721  | 0.86 | 0.05 | 6  |
| 22 ZK829.4 | ALSALMTYK                | 82  | 5889  | 0.86 | 0.14 | 16 |
| 22 ZK829.4 | ALSALMTYK                | 69  | 4689  | 0.86 | 0.11 | 13 |
| 10 ZK829.4 | MVDFYFNK                 | 33  | 1142  | 0.86 | 0.14 | 16 |
| 7 ZK829.4  | VIGIQEYDCAVYNPDGIHPK     | 15  | 5591  | 0.86 | 0.13 | 15 |
| 1 ZK829.4  | MLLASVQESLSK             | 68  | 736   | 0.86 | 0.15 | 18 |
| 10 ZK829.4 | ALSALMTYK                | 75  | 4635  | 0.87 | 0.07 | 8  |
| 22 ZK829.4 | MVGLDTGLAGK              | 69  | 7128  | 0.87 | 0.14 | 16 |
| 10 ZK829.4 | NLNHVSYGRLTFK            | 16  | 24279 | 0.87 | 0.25 | 29 |
| 10 ZK829.4 | MLLASVQESLSK             | 26  | 1347  | 0.87 | 0.20 | 22 |
| 10 ZK829.4 | MLLASVQESLSK             | 74  | 5018  | 0.87 | 0.13 | 15 |
| 1 ZK829.4  | MLLASVQESLSK             | 40  | 537   | 0.87 | 0.16 | 18 |
| 7 ZK829.4  | MVDFYFNK                 | 22  | 1363  | 0.87 | 0.12 | 13 |
| 10 ZK829.4 | MVDFYFNK                 | 22  | 2623  | 0.87 | 0.10 | 12 |
| 7 ZK829.4  | NFDPFTELMYEK             | 17  | 1703  | 0.87 | 0.24 | 28 |
| 10 ZK829.4 | MVDFYFNK                 | 42  | 7621  | 0.88 | 0.09 | 10 |
| 7 ZK829.4  | ALSALMTYK                | 42  | 3843  | 0.88 | 0.15 | 17 |
| 7 ZK829.4  | GGIRYSLDVCDEVK           | 84  | 6787  | 0.88 | 0.14 | 16 |
| 22 ZK829.4 | ALSALMTYK                | 69  | 2789  | 0.88 | 0.24 | 27 |
| 10 ZK829.4 | ITRRIAIEFAK              | 12  | 4233  | 0.88 | 0.15 | 17 |
| 1 ZK829.4  | MVDFYFNK                 | 16  | 381   | 0.88 | 0.19 | 22 |
| 7 ZK829.4  | ALSALMTYK                | 78  | 10047 | 0.88 | 0.15 | 17 |
| 7 ZK829.4  | MVDFYFNK                 | 21  | 1838  | 0.88 | 0.08 | 9  |
| 22 ZK829.4 | ALSALMTYK                | 41  | 2938  | 0.88 | 0.30 | 35 |
| 7 ZK829.4  | MVDFYFNK                 | 32  | 2938  | 0.88 | 0.12 | 13 |
| 22 ZK829.4 | MVGLDTGLAGK              | 54  | 5282  | 0.88 | 0.07 | 8  |
| 7 ZK829.4  | NLVSGILGAIKPVNK          | 27  | 4030  | 0.88 | 0.15 | 17 |
| 10 ZK829.4 | VIGIQEYDCAVYNPDGIHPK     | 15  | 3064  | 0.88 | 0.16 | 18 |
| 22 ZK829.4 | MVDFYFNK                 | 46  | 12075 | 0.88 | 0.05 | 6  |
| 7 ZK829.4  | ALSALMTYK                | 23  | 1491  | 0.88 | 0.51 | 58 |
| 1 ZK829.4  | MVGLDTGLAGK              | 31  | 2838  | 0.88 | 0.15 | 17 |
| 10 ZK829.4 | ALSALMTYK                | 79  | 4354  | 0.89 | 0.11 | 13 |
| 7 ZK829.4  | MVDFYFNK                 | 38  | 2791  | 0.89 | 0.11 | 13 |
| 1 ZK829.4  | MLLASVQESLSK             | 22  | 529   | 0.89 | 0.17 | 20 |
| 1 ZK829.4  | MVGLDTGLAGK              | 72  | 1827  | 0.89 | 0.14 | 16 |
| 22 ZK829.4 | MLLASVQESLSK             | 74  | 2519  | 0.89 | 0.11 | 12 |
| 22 ZK829.4 | NLNHVSYGRLTFK            | 15  | 16971 | 0.89 | 0.28 | 31 |
| 10 ZK829.4 | ALSALMTYK                | 67  | 4546  | 0.89 | 0.13 | 15 |
| 22 ZK829.4 | MVGLDTGLAGK              | 66  | 6860  | 0.89 | 0.14 | 15 |
| 1 ZK829.4  | MLLASVQESLSK             | 77  | 1702  | 0.90 | 0.18 | 20 |
| 1 ZK829.4  | MLLASVQESLSK             | 76  | 1396  | 0.90 | 0.20 | 22 |
| 22 ZK829.4 | ALSALMTYK                | 46  | 2758  | 0.90 | 0.33 | 37 |
| 7 ZK829.4  | GGIRYSLDVCDEVK           | 16  | 5257  | 0.90 | 0.14 | 15 |
| 1 ZK829.4  | MLLASVQESLSK             | 95  | 1024  | 0.90 | 0.14 | 16 |
| 10 ZK829.4 | NLVSGILGAIKPVNK          | 17  | 2083  | 0.90 | 0.10 | 11 |
| 7 ZK829.4  | MVDFYFNK                 | 20  | 2064  | 0.91 | 0.06 | 7  |
| 10 ZK829.4 | NLVSGILGAIKPVNK          | 38  | 4763  | 0.91 | 0.29 | 32 |
| 7 ZK829.4  | MLLASVQESLSK             | 53  | 1079  | 0.91 | 0.23 | 25 |
| 7 ZK829.4  | MVDFYFNK                 | 10  | 2371  | 0.91 | 0.13 | 14 |

|            |                          |     |       |      |      |    |
|------------|--------------------------|-----|-------|------|------|----|
| 1 ZK829.4  | MVDFYFNK                 | 11  | 354   | 0.91 | 0.28 | 30 |
| 10 ZK829.4 | GLEVFTNDADYMK            | 69  | 2077  | 0.91 | 0.19 | 21 |
| 10 ZK829.4 | DCPVEPNAAFAAK            | 41  | 9265  | 0.91 | 0.05 | 6  |
| 10 ZK829.4 | MLLASVQESLSK             | 49  | 1018  | 0.91 | 0.21 | 23 |
| 1 ZK829.4  | MVGLDTGLAGK              | 97  | 7059  | 0.92 | 0.06 | 6  |
| 10 ZK829.4 | ALSALMTYK                | 36  | 2697  | 0.92 | 0.14 | 15 |
| 10 ZK829.4 | NLVSGILGAIKPVNK          | 19  | 4892  | 0.92 | 0.17 | 18 |
| 1 ZK829.4  | NFDPFTELMYEK             | 36  | 1472  | 0.92 | 0.23 | 25 |
| 10 ZK829.4 | MLLASVQESLSK             | 61  | 889   | 0.92 | 0.22 | 24 |
| 10 ZK829.4 | NFDPFTELMYEK             | 58  | 1526  | 0.92 | 0.14 | 16 |
| 22 ZK829.4 | QYTDYEIEK                | 27  | 2145  | 0.92 | 0.12 | 13 |
| 7 ZK829.4  | VIGIQEYDCAVYNPDGIHPK     | 20  | 7383  | 0.92 | 0.10 | 11 |
| 7 ZK829.4  | GLEVFTNDADYMK            | 101 | 7053  | 0.92 | 0.07 | 8  |
| 1 ZK829.4  | MLLASVQESLSK             | 36  | 1112  | 0.92 | 0.13 | 14 |
| 7 ZK829.4  | GLEVFTNDADYMK            | 65  | 1114  | 0.92 | 0.19 | 20 |
| 7 ZK829.4  | MLLASVQESLSK             | 48  | 1527  | 0.92 | 0.10 | 10 |
| 22 ZK829.4 | MLLASVQESLSK             | 42  | 565   | 0.92 | 0.14 | 15 |
| 22 ZK829.4 | ALSALMTYK                | 41  | 11181 | 0.92 | 0.06 | 6  |
| 10 ZK829.4 | DIVHSGLEYTMQRSGEAIIRTAHK | 10  | 6283  | 0.93 | 0.14 | 15 |
| 22 ZK829.4 | MLLASVQESLSK             | 36  | 877   | 0.93 | 0.17 | 19 |
| 10 ZK829.4 | GLEVFTNDADYMK            | 60  | 1336  | 0.93 | 0.15 | 16 |
| 10 ZK829.4 | ALSALMTYK                | 48  | 1847  | 0.93 | 0.13 | 13 |
| 1 ZK829.4  | ALSALMTYK                | 27  | 1243  | 0.93 | 0.23 | 25 |
| 22 ZK829.4 | MLLASVQESLSK             | 44  | 1029  | 0.93 | 0.13 | 14 |
| 7 ZK829.4  | NLVSGILGAIKPVNK          | 24  | 3321  | 0.93 | 0.51 | 55 |
| 22 ZK829.4 | MLLASVQESLSK             | 59  | 2552  | 0.93 | 0.12 | 13 |
| 22 ZK829.4 | ALSALMTYK                | 53  | 10606 | 0.93 | 0.33 | 36 |
| 22 ZK829.4 | ITRRIAIEFAK              | 11  | 4336  | 0.93 | 0.17 | 18 |
| 10 ZK829.4 | NFDPFTELMYEK             | 36  | 2307  | 0.93 | 0.15 | 16 |
| 1 ZK829.4  | MVDFYFNK                 | 12  | 793   | 0.93 | 0.15 | 16 |
| 22 ZK829.4 | MLLASVQESLSK             | 78  | 10353 | 0.94 | 0.07 | 8  |
| 10 ZK829.4 | MVGLDTGLAGK              | 124 | 86127 | 0.94 | 0.10 | 10 |
| 7 ZK829.4  | MLLASVQESLSK             | 49  | 1158  | 0.94 | 0.16 | 17 |
| 10 ZK829.4 | MLLASVQESLSK             | 77  | 1942  | 0.94 | 0.16 | 17 |
| 10 ZK829.4 | MLLASVQESLSK             | 67  | 1423  | 0.94 | 0.06 | 7  |
| 7 ZK829.4  | MLLASVQESLSK             | 61  | 996   | 0.94 | 0.31 | 33 |
| 22 ZK829.4 | MVDFYFNK                 | 21  | 616   | 0.94 | 0.10 | 10 |
| 22 ZK829.4 | MLLASVQESLSK             | 75  | 2341  | 0.94 | 0.14 | 15 |
| 7 ZK829.4  | MVDFYFNK                 | 22  | 1259  | 0.94 | 0.08 | 9  |
| 7 ZK829.4  | ENASRIQAK                | 12  | 728   | 0.95 | 0.28 | 30 |
| 7 ZK829.4  | MVGLDTGLAGK              | 64  | 14691 | 0.95 | 0.09 | 9  |
| 10 ZK829.4 | MVGLDTGLAGK              | 47  | 8994  | 0.95 | 0.13 | 14 |
| 22 ZK829.4 | ALSALMTYK                | 63  | 4562  | 0.95 | 0.29 | 30 |
| 22 ZK829.4 | MVGLDTGLAGK              | 115 | 53419 | 0.95 | 0.09 | 9  |
| 22 ZK829.4 | MLLASVQESLSK             | 32  | 830   | 0.95 | 0.10 | 11 |
| 1 ZK829.4  | ALSALMTYK                | 31  | 942   | 0.96 | 0.14 | 14 |
| 1 ZK829.4  | GLEVFTNDADYMK            | 59  | 2318  | 0.96 | 0.18 | 19 |
| 1 ZK829.4  | MVDFYFNK                 | 13  | 382   | 0.96 | 0.14 | 15 |
| 22 ZK829.4 | MVGLDTGLAGK              | 70  | 6795  | 0.96 | 0.09 | 9  |
| 10 ZK829.4 | NFDPFTELMYEK             | 55  | 2476  | 0.97 | 0.09 | 9  |
| 22 ZK829.4 | MLLASVQESLSK             | 85  | 8195  | 0.97 | 0.10 | 10 |
| 7 ZK829.4  | MVGLDTGLAGK              | 64  | 4533  | 0.97 | 0.09 | 9  |
| 1 ZK829.4  | MVDFYFNK                 | 22  | 431   | 0.97 | 0.30 | 31 |
| 7 ZK829.4  | MVDFYFNK                 | 14  | 1626  | 0.97 | 0.11 | 11 |
| 1 ZK829.4  | GLEVFTNDADYMK            | 73  | 2216  | 0.97 | 0.14 | 14 |
| 1 ZK829.4  | DCPVEPNAAFAAK            | 12  | 3035  | 0.97 | 0.18 | 18 |
| 7 ZK829.4  | GLEVFTNDADYMK            | 61  | 2728  | 0.97 | 0.11 | 12 |
| 22 ZK829.4 | MLLASVQESLSK             | 39  | 834   | 0.97 | 0.20 | 21 |
| 1 ZK829.4  | GLEVFTNDADYMK            | 78  | 2195  | 0.98 | 0.14 | 14 |
| 1 ZK829.4  | MVGLDTGLAGK              | 38  | 1595  | 0.98 | 0.10 | 10 |
| 10 ZK829.4 | MVDFYFNK                 | 30  | 1105  | 0.99 | 0.14 | 14 |
| 7 ZK829.4  | MVDFYFNK                 | 14  | 2225  | 0.99 | 0.13 | 13 |
| 7 ZK829.4  | DCPVEPNAAFAAK            | 23  | 4986  | 0.99 | 0.10 | 10 |
| 10 ZK829.4 | MLLASVQESLSK             | 46  | 1373  | 0.99 | 0.16 | 16 |
| 1 ZK829.4  | GLEVFTNDADYMK            | 46  | 2498  | 0.99 | 0.13 | 13 |
| 7 ZK829.4  | ALSALMTYK                | 49  | 2812  | 0.99 | 0.07 | 7  |
| 7 ZK829.4  | MVGLDTGLAGK              | 62  | 9384  | 0.99 | 0.06 | 6  |
| 22 ZK829.4 | GGIRYSLDVCDEVK           | 80  | 3678  | 0.99 | 0.14 | 14 |
| 7 ZK829.4  | DCPVEPNAAFAAK            | 14  | 6348  | 0.99 | 0.10 | 10 |
| 1 ZK829.4  | MVDFYFNK                 | 18  | 1046  | 1.00 | 0.12 | 12 |
| 22 ZK829.4 | ALSALMTYK                | 47  | 3271  | 1.00 | 0.23 | 23 |
| 10 ZK829.4 | MVDFYFNK                 | 14  | 756   | 1.00 | 0.14 | 14 |
| 22 ZK829.4 | NLNHVSYGRLTFK            | 50  | 4723  | 1.00 | 0.11 | 11 |
| 22 ZK829.4 | MLLASVQESLSK             | 74  | 1388  | 1.00 | 0.14 | 14 |
| 10 ZK829.4 | MVGLDTGLAGK              | 102 | 4338  | 1.00 | 0.13 | 13 |
| 7 ZK829.4  | GLEVFTNDADYMK            | 85  | 3435  | 1.01 | 0.12 | 12 |
| 10 ZK829.4 | NLVSGILGAIKPVNK          | 16  | 2056  | 1.01 | 0.24 | 24 |
| 1 ZK829.4  | NFDPFTELMYEK             | 22  | 505   | 1.01 | 0.17 | 17 |
| 10 ZK829.4 | MVGLDTGLAGK              | 97  | 9261  | 1.01 | 0.15 | 15 |
| 22 ZK829.4 | NFDPFTELMYEK             | 21  | 1269  | 1.01 | 0.17 | 17 |
| 7 ZK829.4  | VIGIQEYDCAVYNPDGIHPK     | 27  | 5691  | 1.01 | 0.12 | 12 |
| 1 ZK829.4  | ALSALMTYK                | 40  | 3890  | 1.01 | 0.15 | 15 |
| 10 ZK829.4 | GLEVFTNDADYMK            | 70  | 2053  | 1.01 | 0.11 | 11 |
| 7 ZK829.4  | MLLASVQESLSK             | 57  | 858   | 1.01 | 0.13 | 13 |
| 10 ZK829.4 | NFDPFTELMYEK             | 54  | 1661  | 1.01 | 0.14 | 14 |
| 22 ZK829.4 | MLLASVQESLSK             | 69  | 2250  | 1.01 | 0.09 | 9  |
| 7 ZK829.4  | MVGLDTGLAGK              | 76  | 15102 | 1.01 | 0.12 | 12 |
| 10 ZK829.4 | MVDFYFNK                 | 37  | 1133  | 1.01 | 0.26 | 26 |
| 7 ZK829.4  | MVGLDTGLAGK              | 20  | 2731  | 1.01 | 0.16 | 16 |
| 10 ZK829.4 | ALSALMTYK                | 17  | 1926  | 1.01 | 0.14 | 14 |
| 10 ZK829.4 | MLLASVQESLSK             | 71  | 1897  | 1.01 | 0.18 | 18 |
| 10 ZK829.4 | MVGLDTGLAGK              | 115 | 80311 | 1.02 | 0.05 | 5  |
| 22 ZK829.4 | MLLASVQESLSK             | 85  | 4428  | 1.02 | 0.08 | 8  |
| 10 ZK829.4 | MLLASVQESLSK             | 49  | 913   | 1.02 | 0.13 | 12 |
| 7 ZK829.4  | MVGLDTGLAGK              | 58  | 1926  | 1.02 | 0.19 | 19 |
| 10 ZK829.4 | MVDFYFNK                 | 28  | 1023  | 1.02 | 0.12 | 11 |
| 22 ZK829.4 | MVGLDTGLAGK              | 123 | 63749 | 1.02 | 0.11 | 11 |
| 7 ZK829.4  | MVGLDTGLAGK              | 59  | 12870 | 1.02 | 0.08 | 7  |
| 10 ZK829.4 | MVDFYFNK                 | 61  | 14069 | 1.02 | 0.07 | 7  |
| 7 ZK829.4  | MVGLDTGLAGK              | 87  | 4171  | 1.02 | 0.18 | 17 |
| 10 ZK829.4 | MVDFYFNK                 | 56  | 10469 | 1.02 | 0.06 | 6  |

|            |                      |     |       |      |      |    |
|------------|----------------------|-----|-------|------|------|----|
| 1 ZK829.4  | MVDFYFNK             | 11  | 365   | 1.02 | 0.15 | 15 |
| 22 ZK829.4 | CAVVDPVPGGAK         | 23  | 1569  | 1.02 | 0.11 | 10 |
| 1 ZK829.4  | MVDFYFNK             | 49  | 6059  | 1.03 | 0.13 | 13 |
| 10 ZK829.4 | ALSALMTYK            | 48  | 6523  | 1.03 | 0.20 | 20 |
| 10 ZK829.4 | ALSALMTYK            | 38  | 2740  | 1.03 | 0.15 | 15 |
| 7 ZK829.4  | ALSALMTYK            | 53  | 2241  | 1.03 | 0.12 | 11 |
| 22 ZK829.4 | GLEVFTNDADYMK        | 79  | 1598  | 1.03 | 0.12 | 12 |
| 1 ZK829.4  | MLLASVQESLSK         | 24  | 349   | 1.03 | 0.27 | 26 |
| 7 ZK829.4  | MVDFYFNK             | 29  | 1857  | 1.04 | 0.07 | 6  |
| 7 ZK829.4  | MLLASVQESLSK         | 50  | 1220  | 1.04 | 0.29 | 28 |
| 1 ZK829.4  | MVDFYFNK             | 29  | 1373  | 1.04 | 0.08 | 8  |
| 10 ZK829.4 | GLEVFTNDADYMK        | 65  | 2000  | 1.04 | 0.16 | 16 |
| 1 ZK829.4  | MVGLDTGLAGK          | 101 | 3607  | 1.05 | 0.17 | 16 |
| 22 ZK829.4 | MLLASVQESLSK         | 10  | 637   | 1.05 | 0.16 | 15 |
| 7 ZK829.4  | ALSALMTYK            | 43  | 13474 | 1.05 | 0.23 | 22 |
| 7 ZK829.4  | NLVSGILGAIKPVNK      | 21  | 3990  | 1.05 | 0.10 | 9  |
| 7 ZK829.4  | MLLASVQESLSK         | 77  | 1843  | 1.05 | 0.25 | 23 |
| 1 ZK829.4  | MVDFYFNK             | 29  | 332   | 1.05 | 0.10 | 10 |
| 1 ZK829.4  | MVDFYFNK             | 35  | 902   | 1.05 | 0.11 | 11 |
| 10 ZK829.4 | MVDFYFNK             | 55  | 14573 | 1.05 | 0.08 | 7  |
| 10 ZK829.4 | ALSALMTYK            | 42  | 3399  | 1.05 | 0.14 | 14 |
| 10 ZK829.4 | GGIRYSLDVCDEVK       | 80  | 6868  | 1.05 | 0.12 | 11 |
| 7 ZK829.4  | GLEVFTNDADYMK        | 58  | 4067  | 1.05 | 0.12 | 11 |
| 22 ZK829.4 | MVGLDTGLAGK          | 55  | 2817  | 1.05 | 0.09 | 8  |
| 7 ZK829.4  | GLEVFTNDADYMK        | 56  | 2709  | 1.06 | 0.08 | 7  |
| 22 ZK829.4 | MVGLDTGLAGK          | 70  | 5286  | 1.06 | 0.08 | 7  |
| 1 ZK829.4  | MVDFYFNK             | 20  | 1518  | 1.06 | 0.09 | 8  |
| 22 ZK829.4 | GLEVFTNDADYMK        | 60  | 1899  | 1.07 | 0.10 | 9  |
| 22 ZK829.4 | NLNHVSYGRLTFK        | 50  | 3009  | 1.07 | 0.12 | 11 |
| 10 ZK829.4 | GLEVFTNDADYMK        | 93  | 6956  | 1.07 | 0.11 | 11 |
| 7 ZK829.4  | MVDFYFNK             | 40  | 2722  | 1.07 | 0.05 | 5  |
| 10 ZK829.4 | NFDPFTELMYEK         | 25  | 1248  | 1.07 | 0.14 | 13 |
| 7 ZK829.4  | NLNHVSYGRLTFK        | 11  | 11789 | 1.07 | 0.28 | 26 |
| 7 ZK829.4  | MVDFYFNK             | 12  | 2346  | 1.07 | 0.17 | 16 |
| 22 ZK829.4 | MVGLDTGLAGK          | 69  | 4490  | 1.07 | 0.09 | 8  |
| 10 ZK829.4 | NLNHVSYGRLTFK        | 30  | 77440 | 1.07 | 0.06 | 6  |
| 7 ZK829.4  | GLEVFTNDADYMK        | 83  | 4238  | 1.07 | 0.16 | 15 |
| 7 ZK829.4  | GLEVFTNDADYMK        | 67  | 6246  | 1.08 | 0.09 | 8  |
| 22 ZK829.4 | GLEVFTNDADYMK        | 86  | 5658  | 1.08 | 0.14 | 13 |
| 7 ZK829.4  | MLLASVQESLSK         | 31  | 666   | 1.08 | 0.17 | 16 |
| 10 ZK829.4 | NFDPFTELMYEK         | 40  | 992   | 1.09 | 0.21 | 19 |
| 7 ZK829.4  | ALSALMTYK            | 48  | 1932  | 1.09 | 0.26 | 24 |
| 7 ZK829.4  | NLNHVSYGRLTFK        | 39  | 2100  | 1.09 | 0.20 | 18 |
| 22 ZK829.4 | VIGIQEYDCAVYNPDGIHPK | 39  | 5800  | 1.09 | 0.17 | 16 |
| 7 ZK829.4  | MVDFYFNK             | 15  | 2468  | 1.09 | 0.08 | 7  |
| 7 ZK829.4  | MVGLDTGLAGK          | 59  | 3166  | 1.09 | 0.16 | 14 |
| 22 ZK829.4 | MLLASVQESLSK         | 69  | 1533  | 1.09 | 0.12 | 11 |
| 22 ZK829.4 | MVGLDTGLAGK          | 82  | 3400  | 1.09 | 0.09 | 8  |
| 22 ZK829.4 | NLNHVSYGRLTFK        | 11  | 13807 | 1.10 | 0.20 | 19 |
| 10 ZK829.4 | NFDPFTELMYEK         | 19  | 629   | 1.10 | 0.17 | 16 |
| 10 ZK829.4 | NLVSGILGAIKPVNK      | 32  | 3239  | 1.10 | 0.21 | 19 |
| 10 ZK829.4 | MLLASVQESLSK         | 59  | 1692  | 1.10 | 0.15 | 14 |
| 10 ZK829.4 | MVGLDTGLAGK          | 32  | 4596  | 1.10 | 0.17 | 15 |
| 1 ZK829.4  | MVGLDTGLAGK          | 63  | 6375  | 1.10 | 0.12 | 11 |
| 10 ZK829.4 | GLEVFTNDADYMK        | 56  | 2345  | 1.10 | 0.16 | 14 |
| 7 ZK829.4  | MLLASVQESLSK         | 55  | 1167  | 1.11 | 0.21 | 19 |
| 10 ZK829.4 | GLEVFTNDADYMK        | 75  | 6296  | 1.11 | 0.08 | 7  |
| 1 ZK829.4  | MLLASVQESLSK         | 55  | 970   | 1.11 | 0.15 | 14 |
| 10 ZK829.4 | ALSALMTYK            | 40  | 3585  | 1.11 | 0.06 | 6  |
| 22 ZK829.4 | NLNHVSYGRLTFK        | 17  | 16227 | 1.12 | 0.19 | 17 |
| 10 ZK829.4 | MVDFYFNK             | 46  | 6806  | 1.12 | 0.10 | 9  |
| 7 ZK829.4  | ENASRIQAK            | 13  | 1431  | 1.12 | 0.11 | 10 |
| 10 ZK829.4 | MLLASVQESLSK         | 51  | 691   | 1.12 | 0.26 | 24 |
| 1 ZK829.4  | MVDFYFNK             | 15  | 1823  | 1.12 | 0.16 | 14 |
| 7 ZK829.4  | GAEVIAPK             | 13  | 1266  | 1.12 | 0.06 | 6  |
| 1 ZK829.4  | ALSALMTYK            | 35  | 1701  | 1.12 | 0.52 | 47 |
| 1 ZK829.4  | DCPVEPNAAFAAK        | 11  | 2865  | 1.12 | 0.07 | 6  |
| 10 ZK829.4 | MVDFYFNK             | 33  | 1074  | 1.12 | 0.17 | 15 |
| 1 ZK829.4  | ALSALMTYK            | 67  | 3772  | 1.12 | 0.24 | 21 |
| 10 ZK829.4 | MLLASVQESLSK         | 54  | 1024  | 1.13 | 0.12 | 11 |
| 22 ZK829.4 | MVDFYFNK             | 10  | 631   | 1.13 | 0.14 | 12 |
| 10 ZK829.4 | MVGLDTGLAGK          | 99  | 12984 | 1.13 | 0.12 | 10 |
| 22 ZK829.4 | MLLASVQESLSK         | 25  | 1051  | 1.13 | 0.11 | 10 |
| 1 ZK829.4  | MVGLDTGLAGK          | 43  | 1936  | 1.13 | 0.14 | 12 |
| 10 ZK829.4 | MVDFYFNK             | 41  | 1411  | 1.13 | 0.11 | 9  |
| 10 ZK829.4 | MLLASVQESLSK         | 52  | 769   | 1.13 | 0.23 | 21 |
| 10 ZK829.4 | MLLASVQESLSK         | 97  | 12898 | 1.14 | 0.21 | 19 |
| 7 ZK829.4  | MLLASVQESLSK         | 47  | 1522  | 1.14 | 0.16 | 14 |
| 22 ZK829.4 | MVGLDTGLAGK          | 52  | 1293  | 1.14 | 0.18 | 16 |
| 1 ZK829.4  | MLLASVQESLSK         | 77  | 1645  | 1.14 | 0.14 | 12 |
| 22 ZK829.4 | MLLASVQESLSK         | 84  | 5879  | 1.14 | 0.11 | 10 |
| 1 ZK829.4  | MVGLDTGLAGK          | 112 | 3389  | 1.15 | 0.13 | 11 |
| 10 ZK829.4 | MVGLDTGLAGK          | 56  | 9846  | 1.15 | 0.15 | 13 |
| 1 ZK829.4  | MLLASVQESLSK         | 76  | 1515  | 1.15 | 0.17 | 15 |
| 22 ZK829.4 | GLEVFTNDADYMK        | 28  | 1883  | 1.15 | 0.09 | 8  |
| 22 ZK829.4 | GLEVFTNDADYMK        | 76  | 2468  | 1.15 | 0.11 | 10 |
| 22 ZK829.4 | MVGLDTGLAGK          | 22  | 7798  | 1.15 | 0.11 | 10 |
| 7 ZK829.4  | MLLASVQESLSK         | 61  | 851   | 1.15 | 0.25 | 21 |
| 1 ZK829.4  | MVDFYFNK             | 42  | 4070  | 1.15 | 0.08 | 7  |
| 22 ZK829.4 | GLEVFTNDADYMK        | 51  | 1755  | 1.15 | 0.17 | 15 |
| 1 ZK829.4  | MVGLDTGLAGK          | 85  | 4882  | 1.16 | 0.13 | 11 |
| 1 ZK829.4  | GLEVFTNDADYMK        | 58  | 1212  | 1.16 | 0.14 | 12 |
| 22 ZK829.4 | MLLASVQESLSK         | 26  | 1045  | 1.16 | 0.12 | 11 |
| 10 ZK829.4 | MVDFYFNK             | 54  | 8893  | 1.17 | 0.09 | 8  |
| 1 ZK829.4  | MVGLDTGLAGK          | 65  | 2044  | 1.17 | 0.12 | 10 |
| 22 ZK829.4 | MVDFYFNK             | 42  | 1746  | 1.17 | 0.12 | 11 |
| 1 ZK829.4  | MLLASVQESLSK         | 34  | 693   | 1.17 | 0.19 | 16 |
| 22 ZK829.4 | GLEVFTNDADYMK        | 63  | 3741  | 1.17 | 0.12 | 10 |
| 10 ZK829.4 | MVGLDTGLAGK          | 79  | 3462  | 1.17 | 0.08 | 7  |
| 1 ZK829.4  | MVDFYFNK             | 42  | 1754  | 1.17 | 0.14 | 12 |
| 7 ZK829.4  | MVDFYFNK             | 19  | 1025  | 1.17 | 0.17 | 15 |

|            |                      |    |       |      |      |    |
|------------|----------------------|----|-------|------|------|----|
| 10 ZK829.4 | MVDFYFNK             | 34 | 1576  | 1.18 | 0.12 | 10 |
| 10 ZK829.4 | MLLASVQESLSK         | 67 | 844   | 1.18 | 0.16 | 13 |
| 1 ZK829.4  | MVGLDTGLAGK          | 54 | 5190  | 1.18 | 0.09 | 7  |
| 7 ZK829.4  | NLVSGILGAIKPVNK      | 50 | 5277  | 1.19 | 0.26 | 22 |
| 10 ZK829.4 | GGIRYSLDVCDEVK       | 65 | 5715  | 1.19 | 0.09 | 8  |
| 7 ZK829.4  | MLLASVQESLSK         | 50 | 823   | 1.19 | 0.06 | 5  |
| 10 ZK829.4 | NFDPFTELMYEK         | 14 | 1639  | 1.19 | 0.14 | 12 |
| 10 ZK829.4 | GGIRYSLDVCDEVK       | 26 | 8704  | 1.19 | 0.13 | 11 |
| 10 ZK829.4 | MVDFYFNK             | 57 | 12989 | 1.19 | 0.10 | 8  |
| 10 ZK829.4 | MVDFYFNK             | 25 | 1477  | 1.20 | 0.09 | 7  |
| 1 ZK829.4  | MVGLDTGLAGK          | 75 | 7035  | 1.21 | 0.10 | 8  |
| 22 ZK829.4 | MLLASVQESLSK         | 69 | 2508  | 1.21 | 0.13 | 11 |
| 1 ZK829.4  | ALSALMTYK            | 26 | 984   | 1.21 | 0.13 | 11 |
| 1 ZK829.4  | MVDFYFNK             | 11 | 649   | 1.21 | 0.06 | 5  |
| 7 ZK829.4  | GGIRYSLDVCDEVK       | 12 | 8847  | 1.21 | 0.13 | 11 |
| 10 ZK829.4 | ALSALMTYK            | 47 | 2726  | 1.21 | 0.14 | 12 |
| 10 ZK829.4 | MLLASVQESLSK         | 37 | 1188  | 1.21 | 0.16 | 14 |
| 7 ZK829.4  | ALSALMTYK            | 33 | 1600  | 1.21 | 0.19 | 16 |
| 7 ZK829.4  | ALSALMTYK            | 45 | 2973  | 1.22 | 0.13 | 11 |
| 22 ZK829.4 | MVDFYFNK             | 59 | 17651 | 1.22 | 0.14 | 11 |
| 22 ZK829.4 | MVDFYFNK             | 13 | 571   | 1.22 | 0.07 | 6  |
| 7 ZK829.4  | MVDFYFNK             | 36 | 4305  | 1.22 | 0.13 | 11 |
| 1 ZK829.4  | MLLASVQESLSK         | 60 | 1093  | 1.22 | 0.19 | 16 |
| 10 ZK829.4 | NFDPFTELMYEK         | 37 | 1106  | 1.22 | 0.11 | 9  |
| 22 ZK829.4 | NFDPFTELMYEK         | 36 | 2290  | 1.22 | 0.12 | 10 |
| 22 ZK829.4 | MLLASVQESLSK         | 46 | 942   | 1.22 | 0.12 | 10 |
| 10 ZK829.4 | GLEVFTNDADYMK        | 53 | 1965  | 1.22 | 0.10 | 8  |
| 10 ZK829.4 | MLLASVQESLSK         | 92 | 17791 | 1.22 | 0.09 | 7  |
| 10 ZK829.4 | ALSALMTYK            | 47 | 2891  | 1.23 | 0.07 | 6  |
| 7 ZK829.4  | DCPVEPNAAFAAK        | 17 | 3135  | 1.23 | 0.11 | 9  |
| 7 ZK829.4  | MVGLDTGLAGK          | 61 | 6991  | 1.23 | 0.13 | 11 |
| 22 ZK829.4 | QYTDYIEK             | 26 | 2087  | 1.23 | 0.18 | 15 |
| 10 ZK829.4 | NFDPFTELMYEK         | 47 | 1795  | 1.24 | 0.12 | 10 |
| 1 ZK829.4  | MVGLDTGLAGK          | 56 | 21493 | 1.24 | 0.10 | 8  |
| 1 ZK829.4  | MLLASVQESLSK         | 67 | 1116  | 1.24 | 0.21 | 17 |
| 1 ZK829.4  | MVDFYFNK             | 33 | 245   | 1.24 | 0.20 | 16 |
| 22 ZK829.4 | MVGLDTGLAGK          | 43 | 5062  | 1.25 | 0.14 | 11 |
| 7 ZK829.4  | MVDFYFNK             | 14 | 729   | 1.25 | 0.12 | 9  |
| 10 ZK829.4 | GLEVFTNDADYMK        | 78 | 2544  | 1.25 | 0.08 | 7  |
| 10 ZK829.4 | ALSALMTYK            | 64 | 5705  | 1.25 | 0.11 | 8  |
| 22 ZK829.4 | GLEVFTNDADYMK        | 38 | 1432  | 1.25 | 0.15 | 12 |
| 7 ZK829.4  | MVGLDTGLAGK          | 79 | 4770  | 1.25 | 0.13 | 11 |
| 7 ZK829.4  | MVDFYFNK             | 17 | 2855  | 1.25 | 0.11 | 8  |
| 7 ZK829.4  | GLEVFTNDADYMK        | 78 | 5532  | 1.25 | 0.10 | 8  |
| 10 ZK829.4 | GLEVFTNDADYMK        | 64 | 3005  | 1.27 | 0.10 | 8  |
| 10 ZK829.4 | MLLASVQESLSK         | 60 | 1456  | 1.27 | 0.20 | 15 |
| 1 ZK829.4  | MVDFYFNK             | 11 | 259   | 1.27 | 0.25 | 20 |
| 7 ZK829.4  | MVGLDTGLAGK          | 36 | 3447  | 1.27 | 0.26 | 21 |
| 1 ZK829.4  | MVDFYFNK             | 14 | 910   | 1.27 | 0.08 | 7  |
| 7 ZK829.4  | NLNHVSYGRLTFK        | 12 | 2857  | 1.27 | 0.17 | 14 |
| 22 ZK829.4 | MVGLDTGLAGK          | 64 | 8893  | 1.27 | 0.09 | 7  |
| 7 ZK829.4  | MVGLDTGLAGK          | 92 | 6321  | 1.28 | 0.10 | 8  |
| 22 ZK829.4 | MVGLDTGLAGK          | 90 | 6624  | 1.28 | 0.09 | 7  |
| 7 ZK829.4  | MVGLDTGLAGK          | 58 | 3429  | 1.28 | 0.14 | 11 |
| 7 ZK829.4  | GLEVFTNDADYMK        | 18 | 2285  | 1.28 | 0.08 | 6  |
| 22 ZK829.4 | QYTDYIEK             | 27 | 3847  | 1.28 | 0.07 | 5  |
| 10 ZK829.4 | NLNHVSYGRLTFK        | 10 | 15284 | 1.28 | 0.14 | 11 |
| 7 ZK829.4  | NLVSGILGAIKPVNK      | 25 | 4728  | 1.28 | 0.19 | 15 |
| 7 ZK829.4  | MLLASVQESLSK         | 79 | 2092  | 1.29 | 0.16 | 13 |
| 10 ZK829.4 | NFDPFTELMYEK         | 26 | 2204  | 1.29 | 0.18 | 14 |
| 10 ZK829.4 | NLNHVSYGRLTFK        | 37 | 1325  | 1.29 | 0.07 | 5  |
| 1 ZK829.4  | MVGLDTGLAGK          | 87 | 3143  | 1.29 | 0.19 | 15 |
| 10 ZK829.4 | MLLASVQESLSK         | 55 | 1186  | 1.29 | 0.20 | 15 |
| 1 ZK829.4  | MLLASVQESLSK         | 62 | 914   | 1.29 | 0.18 | 14 |
| 10 ZK829.4 | ALSALMTYK            | 51 | 15176 | 1.30 | 0.08 | 6  |
| 7 ZK829.4  | NFDPFTELMYEK         | 50 | 3907  | 1.30 | 0.14 | 11 |
| 7 ZK829.4  | MLLASVQESLSK         | 38 | 871   | 1.31 | 0.09 | 7  |
| 22 ZK829.4 | NFDPFTELMYEK         | 34 | 923   | 1.31 | 0.16 | 12 |
| 1 ZK829.4  | MVGLDTGLAGK          | 90 | 5437  | 1.31 | 0.08 | 6  |
| 22 ZK829.4 | MLLASVQESLSK         | 42 | 1062  | 1.31 | 0.12 | 9  |
| 10 ZK829.4 | MVDFYFNK             | 59 | 8371  | 1.31 | 0.11 | 8  |
| 22 ZK829.4 | GLEVFTNDADYMK        | 69 | 2235  | 1.31 | 0.18 | 13 |
| 1 ZK829.4  | MLLASVQESLSK         | 50 | 826   | 1.32 | 0.18 | 14 |
| 10 ZK829.4 | MLLASVQESLSK         | 13 | 743   | 1.32 | 0.24 | 18 |
| 7 ZK829.4  | MVGLDTGLAGK          | 71 | 8912  | 1.33 | 0.07 | 6  |
| 22 ZK829.4 | MVDFYFNK             | 51 | 16651 | 1.33 | 0.04 | 3  |
| 22 ZK829.4 | GLEVFTNDADYMK        | 62 | 3849  | 1.33 | 0.13 | 10 |
| 1 ZK829.4  | NFDPFTELMYEK         | 12 | 722   | 1.34 | 0.33 | 25 |
| 10 ZK829.4 | MVGLDTGLAGK          | 82 | 8957  | 1.34 | 0.08 | 6  |
| 22 ZK829.4 | MVGLDTGLAGK          | 46 | 5858  | 1.34 | 0.14 | 10 |
| 1 ZK829.4  | MVDFYFNK             | 12 | 324   | 1.35 | 0.12 | 9  |
| 7 ZK829.4  | NFDPFTELMYEK         | 27 | 1259  | 1.35 | 0.16 | 12 |
| 7 ZK829.4  | GGIRYSLDVCDEVK       | 77 | 5644  | 1.35 | 0.11 | 8  |
| 22 ZK829.4 | GLEVFTNDADYMK        | 28 | 1643  | 1.35 | 0.09 | 7  |
| 7 ZK829.4  | DCPVEPNAAFAAK        | 24 | 4690  | 1.35 | 0.53 | 39 |
| 7 ZK829.4  | NFDPFTELMYEK         | 35 | 2471  | 1.36 | 0.14 | 10 |
| 22 ZK829.4 | MVDFYFNK             | 37 | 1307  | 1.36 | 0.17 | 13 |
| 10 ZK829.4 | MLLASVQESLSK         | 45 | 928   | 1.36 | 0.07 | 5  |
| 7 ZK829.4  | MVDFYFNK             | 49 | 2898  | 1.37 | 0.10 | 7  |
| 7 ZK829.4  | VIGIQEYDCAVYNPDGIHPK | 38 | 7030  | 1.37 | 0.16 | 12 |
| 1 ZK829.4  | ALSALMTYK            | 24 | 1527  | 1.37 | 0.19 | 14 |
| 22 ZK829.4 | MLLASVQESLSK         | 72 | 1772  | 1.37 | 0.14 | 10 |
| 1 ZK829.4  | MVDFYFNK             | 25 | 1718  | 1.38 | 0.05 | 4  |
| 10 ZK829.4 | MVDFYFNK             | 44 | 2074  | 1.38 | 0.12 | 9  |
| 1 ZK829.4  | MVDFYFNK             | 19 | 1090  | 1.38 | 0.14 | 10 |
| 22 ZK829.4 | NLVSGILGAIKPVNK      | 43 | 813   | 1.38 | 0.22 | 16 |
| 1 ZK829.4  | MVGLDTGLAGK          | 54 | 928   | 1.38 | 0.32 | 23 |
| 7 ZK829.4  | GLEVFTNDADYMK        | 62 | 2803  | 1.39 | 0.15 | 11 |
| 22 ZK829.4 | ALSALMTYK            | 40 | 1438  | 1.40 | 0.36 | 26 |
| 22 ZK829.4 | MVGLDTGLAGK          | 49 | 5606  | 1.40 | 0.19 | 13 |
| 10 ZK829.4 | MVDFYFNK             | 42 | 2347  | 1.40 | 0.09 | 6  |

|            |                         |     |       |      |      |    |
|------------|-------------------------|-----|-------|------|------|----|
| 22 ZK829.4 | MLLASVQESLSK            | 41  | 1276  | 1.40 | 0.08 | 6  |
| 10 ZK829.4 | MLLASVQESLSK            | 43  | 1111  | 1.41 | 0.27 | 19 |
| 10 ZK829.4 | GLEVFTNDADYMK           | 81  | 5048  | 1.41 | 0.14 | 10 |
| 10 ZK829.4 | MVDFYFNK                | 23  | 1142  | 1.42 | 0.14 | 10 |
| 22 ZK829.4 | MLLASVQESLSK            | 64  | 1950  | 1.42 | 0.10 | 7  |
| 10 ZK829.4 | MVGLDTGLAGK             | 88  | 2984  | 1.42 | 0.15 | 11 |
| 1 ZK829.4  | MLLASVQESLSK            | 64  | 846   | 1.42 | 0.13 | 9  |
| 10 ZK829.4 | ALSALMTYK               | 62  | 4839  | 1.43 | 0.07 | 5  |
| 10 ZK829.4 | ALSALMTYK               | 38  | 17184 | 1.43 | 0.19 | 13 |
| 22 ZK829.4 | GLEVFTNDADYMK           | 49  | 2837  | 1.44 | 0.16 | 11 |
| 1 ZK829.4  | CAVVDVPFGGAK            | 19  | 1679  | 1.44 | 0.19 | 13 |
| 7 ZK829.4  | MVGLDTGLAGK             | 88  | 4790  | 1.44 | 0.11 | 8  |
| 1 ZK829.4  | MLLASVQESLSK            | 58  | 988   | 1.45 | 0.22 | 15 |
| 10 ZK829.4 | MLLASVQESLSK            | 59  | 1717  | 1.45 | 0.09 | 7  |
| 7 ZK829.4  | MVDFYFNK                | 26  | 4012  | 1.46 | 0.09 | 6  |
| 7 ZK829.4  | NFDPFTELMYEK            | 14  | 995   | 1.46 | 0.17 | 12 |
| 22 ZK829.4 | MVGLDTGLAGK             | 54  | 2375  | 1.46 | 0.15 | 10 |
| 1 ZK829.4  | MVGLDTGLAGK             | 53  | 19121 | 1.46 | 0.20 | 13 |
| 1 ZK829.4  | MVDFYFNK                | 28  | 1150  | 1.47 | 0.17 | 12 |
| 1 ZK829.4  | MVDFYFNK                | 33  | 1507  | 1.47 | 0.26 | 18 |
| 7 ZK829.4  | MLLASVQESLSK            | 60  | 1556  | 1.47 | 0.15 | 10 |
| 1 ZK829.4  | MVDFYFNK                | 23  | 328   | 1.47 | 0.24 | 16 |
| 1 ZK829.4  | MVDFYFNK                | 34  | 741   | 1.48 | 0.06 | 4  |
| 10 ZK829.4 | NFDPFTELMYEK            | 31  | 1719  | 1.48 | 0.15 | 10 |
| 22 ZK829.4 | GLEVFTNDADYMK           | 77  | 4802  | 1.48 | 0.14 | 10 |
| 1 ZK829.4  | ALSALMTYK               | 29  | 3103  | 1.49 | 0.67 | 45 |
| 7 ZK829.4  | MVGLDTGLAGK             | 66  | 4095  | 1.50 | 0.15 | 10 |
| 22 ZK829.4 | MVGLDTGLAGK             | 96  | 3142  | 1.50 | 0.11 | 8  |
| 22 ZK829.4 | MVGLDTGLAGK             | 89  | 4048  | 1.51 | 0.09 | 6  |
| 7 ZK829.4  | MLLASVQESLSK            | 56  | 1385  | 1.51 | 0.15 | 10 |
| 1 ZK829.4  | GLEVFTNDADYMK           | 73  | 4591  | 1.51 | 0.16 | 11 |
| 7 ZK829.4  | NFDPFTELMYEK            | 25  | 3040  | 1.52 | 0.16 | 10 |
| 22 ZK829.4 | MVDFYFNK                | 39  | 2527  | 1.52 | 0.17 | 11 |
| 1 ZK829.4  | MVDFYFNK                | 25  | 2635  | 1.54 | 0.12 | 8  |
| 22 ZK829.4 | MVGLDTGLAGK             | 61  | 3301  | 1.54 | 0.14 | 9  |
| 22 ZK829.4 | DIVHSGLEYTMQRSGEAIHTAHK | 13  | 2839  | 1.55 | 0.45 | 29 |
| 1 ZK829.4  | GLEVFTNDADYMK           | 63  | 1746  | 1.57 | 0.13 | 8  |
| 1 ZK829.4  | MVDFYFNK                | 28  | 2184  | 1.58 | 0.05 | 3  |
| 22 ZK829.4 | MLLASVQESLSK            | 12  | 718   | 1.59 | 0.22 | 14 |
| 1 ZK829.4  | MVDFYFNK                | 27  | 1733  | 1.59 | 0.05 | 3  |
| 22 ZK829.4 | MVGLDTGLAGK             | 67  | 2875  | 1.59 | 0.08 | 5  |
| 10 ZK829.4 | MLLASVQESLSK            | 44  | 1347  | 1.60 | 0.15 | 10 |
| 10 ZK829.4 | NLVSGILGAIKPVNK         | 26  | 1987  | 1.60 | 0.30 | 19 |
| 22 ZK829.4 | NFDPFTELMYEK            | 47  | 1171  | 1.60 | 0.11 | 7  |
| 10 ZK829.4 | ALSALMTYK               | 68  | 6710  | 1.61 | 0.14 | 9  |
| 1 ZK829.4  | MVGLDTGLAGK             | 66  | 4049  | 1.61 | 0.15 | 9  |
| 22 ZK829.4 | MLLASVQESLSK            | 81  | 2356  | 1.61 | 0.14 | 9  |
| 7 ZK829.4  | NFDPFTELMYEK            | 46  | 1329  | 1.61 | 0.21 | 13 |
| 10 ZK829.4 | VIGIQEYDCAVYNPDGIHPK    | 30  | 4835  | 1.61 | 0.22 | 13 |
| 10 ZK829.4 | MVGLDTGLAGK             | 74  | 9450  | 1.62 | 0.13 | 8  |
| 7 ZK829.4  | ALSALMTYK               | 50  | 4754  | 1.62 | 0.08 | 5  |
| 7 ZK829.4  | NFDPFTELMYEK            | 31  | 1042  | 1.63 | 0.19 | 12 |
| 7 ZK829.4  | GLEVFTNDADYMK           | 58  | 2841  | 1.63 | 0.13 | 8  |
| 7 ZK829.4  | MLLASVQESLSK            | 56  | 1556  | 1.63 | 0.16 | 10 |
| 1 ZK829.4  | MVDFYFNK                | 32  | 3980  | 1.63 | 0.10 | 6  |
| 22 ZK829.4 | MVGLDTGLAGK             | 58  | 6678  | 1.64 | 0.12 | 7  |
| 10 ZK829.4 | MVGLDTGLAGK             | 71  | 2441  | 1.65 | 0.17 | 10 |
| 22 ZK829.4 | MLLASVQESLSK            | 78  | 2775  | 1.65 | 0.13 | 8  |
| 10 ZK829.4 | MLLASVQESLSK            | 70  | 1745  | 1.66 | 0.12 | 7  |
| 22 ZK829.4 | MVGLDTGLAGK             | 92  | 3616  | 1.67 | 0.12 | 7  |
| 7 ZK829.4  | MLLASVQESLSK            | 38  | 1333  | 1.67 | 0.21 | 13 |
| 22 ZK829.4 | MLLASVQESLSK            | 43  | 1217  | 1.67 | 0.16 | 10 |
| 10 ZK829.4 | MVGLDTGLAGK             | 42  | 3948  | 1.68 | 0.13 | 8  |
| 22 ZK829.4 | MVGLDTGLAGK             | 89  | 2208  | 1.68 | 0.15 | 9  |
| 22 ZK829.4 | MVDFYFNK                | 46  | 5132  | 1.69 | 0.10 | 6  |
| 10 ZK829.4 | GLEVFTNDADYMK           | 81  | 3980  | 1.69 | 0.16 | 9  |
| 1 ZK829.4  | MVGLDTGLAGK             | 56  | 4466  | 1.70 | 0.18 | 11 |
| 10 ZK829.4 | GLEVFTNDADYMK           | 77  | 2488  | 1.71 | 0.17 | 10 |
| 1 ZK829.4  | GLEVFTNDADYMK           | 84  | 2450  | 1.71 | 0.12 | 7  |
| 7 ZK829.4  | NFDPFTELMYEK            | 21  | 2856  | 1.71 | 0.12 | 7  |
| 10 ZK829.4 | MVDFYFNK                | 57  | 17748 | 1.72 | 0.06 | 3  |
| 7 ZK829.4  | MVDFYFNK                | 48  | 28041 | 1.73 | 0.11 | 6  |
| 7 ZK829.4  | MVDFYFNK                | 35  | 2626  | 1.74 | 0.17 | 10 |
| 1 ZK829.4  | MLLASVQESLSK            | 52  | 1073  | 1.74 | 0.20 | 11 |
| 10 ZK829.4 | MVGLDTGLAGK             | 105 | 9510  | 1.76 | 0.07 | 4  |
| 1 ZK829.4  | NLNHVSYGRLTFK           | 18  | 29744 | 1.76 | 0.21 | 12 |
| 1 ZK829.4  | GLEVFTNDADYMK           | 71  | 2092  | 1.76 | 0.25 | 14 |
| 1 ZK829.4  | MLLASVQESLSK            | 70  | 1433  | 1.77 | 0.15 | 8  |
| 10 ZK829.4 | MVGLDTGLAGK             | 81  | 8649  | 1.77 | 0.14 | 8  |
| 1 ZK829.4  | MLLASVQESLSK            | 99  | 1422  | 1.78 | 0.20 | 11 |
| 1 ZK829.4  | CAVVDVPFGGAK            | 29  | 1445  | 1.78 | 0.13 | 7  |
| 10 ZK829.4 | NLVSGILGAIKPVNK         | 41  | 4241  | 1.80 | 0.28 | 16 |
| 10 ZK829.4 | MVGLDTGLAGK             | 64  | 10880 | 1.80 | 0.05 | 3  |
| 10 ZK829.4 | NLNHVSYGRLTFK           | 39  | 2917  | 1.81 | 0.13 | 7  |
| 22 ZK829.4 | NLNHVSYGRLTFK           | 18  | 20115 | 1.81 | 0.10 | 6  |
| 7 ZK829.4  | MVDFYFNK                | 49  | 21116 | 1.81 | 0.07 | 4  |
| 22 ZK829.4 | GLEVFTNDADYMK           | 94  | 9834  | 1.81 | 0.11 | 6  |
| 10 ZK829.4 | GLEVFTNDADYMK           | 83  | 12651 | 1.81 | 0.07 | 4  |
| 1 ZK829.4  | NLNHVSYGRLTFK           | 23  | 25404 | 1.82 | 0.13 | 7  |
| 7 ZK829.4  | MVGLDTGLAGK             | 67  | 3968  | 1.84 | 0.17 | 9  |
| 7 ZK829.4  | MVGLDTGLAGK             | 76  | 5929  | 1.86 | 0.09 | 5  |
| 10 ZK829.4 | MLLASVQESLSK            | 89  | 2848  | 1.86 | 0.19 | 10 |
| 10 ZK829.4 | NLNHVSYGRLTFK           | 56  | 3336  | 1.86 | 0.12 | 6  |
| 22 ZK829.4 | ALSALMTYK               | 51  | 5063  | 1.87 | 0.10 | 5  |
| 22 ZK829.4 | ALSALMTYK               | 88  | 5326  | 1.88 | 0.10 | 5  |
| 10 ZK829.4 | MVDFYFNK                | 43  | 11210 | 1.88 | 0.13 | 7  |
| 10 ZK829.4 | NLNHVSYGRLTFK           | 13  | 9082  | 1.88 | 0.12 | 6  |
| 10 ZK829.4 | MVDFYFNK                | 15  | 473   | 1.88 | 0.18 | 10 |
| 10 ZK829.4 | MVGLDTGLAGK             | 90  | 7666  | 1.90 | 0.08 | 4  |
| 22 ZK829.4 | GLEVFTNDADYMK           | 103 | 13427 | 1.90 | 0.06 | 3  |
| 10 ZK829.4 | GLEVFTNDADYMK           | 79  | 6090  | 1.92 | 0.08 | 4  |

|            |                      |     |       |       |      |    |
|------------|----------------------|-----|-------|-------|------|----|
| 1 ZK829.4  | MLLASVQESLSK         | 37  | 581   | 1.92  | 0.20 | 10 |
| 7 ZK829.4  | ALSALMTYK            | 44  | 4781  | 1.92  | 0.14 | 7  |
| 7 ZK829.4  | MVGLDTGLAGK          | 105 | 12344 | 1.94  | 0.08 | 4  |
| 1 ZK829.4  | GLEVFTNDADYMK        | 58  | 3683  | 1.95  | 0.21 | 11 |
| 22 ZK829.4 | MLLASVQESLSK         | 53  | 1916  | 1.97  | 0.11 | 6  |
| 7 ZK829.4  | MVGLDTGLAGK          | 51  | 14472 | 1.98  | 0.13 | 6  |
| 10 ZK829.4 | NLVSGILGAIKPVNK      | 30  | 4265  | 1.99  | 0.29 | 14 |
| 7 ZK829.4  | MVGLDTGLAGK          | 86  | 10458 | 1.99  | 0.08 | 4  |
| 10 ZK829.4 | ITRRIAIEFAK          | 10  | 5056  | 1.99  | 0.12 | 6  |
| 1 ZK829.4  | NFDPFTELMYEK         | 31  | 369   | 2.01  | 0.37 | 18 |
| 10 ZK829.4 | GLEVFTNDADYMK        | 84  | 14533 | 2.01  | 0.10 | 5  |
| 10 ZK829.4 | VIGIQEYDCAVYNPDGIHPK | 13  | 3069  | 2.01  | 0.25 | 13 |
| 7 ZK829.4  | MVGLDTGLAGK          | 78  | 5904  | 2.03  | 0.07 | 3  |
| 10 ZK829.4 | MVGLDTGLAGK          | 105 | 5230  | 2.03  | 0.08 | 4  |
| 7 ZK829.4  | MVGLDTGLAGK          | 78  | 3881  | 2.05  | 0.14 | 7  |
| 10 ZK829.4 | MVGLDTGLAGK          | 69  | 26210 | 2.05  | 0.18 | 9  |
| 7 ZK829.4  | GLEVFTNDADYMK        | 53  | 8781  | 2.06  | 0.12 | 6  |
| 10 ZK829.4 | MLLASVQESLSK         | 51  | 1434  | 2.07  | 0.24 | 11 |
| 10 ZK829.4 | MVGLDTGLAGK          | 41  | 19114 | 2.07  | 0.12 | 6  |
| 1 ZK829.4  | DCPVEPNAAFAAK        | 39  | 4590  | 2.08  | 0.19 | 9  |
| 7 ZK829.4  | MVGLDTGLAGK          | 71  | 21045 | 2.11  | 0.12 | 6  |
| 22 ZK829.4 | MLLASVQESLSK         | 68  | 2427  | 2.11  | 0.13 | 6  |
| 7 ZK829.4  | MVDFYFNK             | 16  | 593   | 2.13  | 0.09 | 4  |
| 1 ZK829.4  | MVDFYFNK             | 15  | 288   | 2.14  | 0.15 | 7  |
| 22 ZK829.4 | MVGLDTGLAGK          | 76  | 5174  | 2.14  | 0.19 | 9  |
| 22 ZK829.4 | MVDFYFNK             | 52  | 13564 | 2.16  | 0.07 | 3  |
| 10 ZK829.4 | MLLASVQESLSK         | 57  | 1174  | 2.17  | 0.14 | 6  |
| 22 ZK829.4 | MVGLDTGLAGK          | 59  | 17023 | 2.20  | 0.21 | 9  |
| 7 ZK829.4  | ITRRIAIEFAK          | 11  | 1820  | 2.21  | 0.20 | 9  |
| 10 ZK829.4 | NLNHVSYGRLTFK        | 15  | 8913  | 2.23  | 0.16 | 7  |
| 1 ZK829.4  | MVDFYFNK             | 33  | 3293  | 2.25  | 0.14 | 6  |
| 7 ZK829.4  | MLLASVQESLSK         | 81  | 7391  | 2.25  | 0.10 | 5  |
| 10 ZK829.4 | GLEVFTNDADYMK        | 64  | 2006  | 2.26  | 0.14 | 6  |
| 10 ZK829.4 | GLEVFTNDADYMK        | 61  | 2687  | 2.27  | 0.11 | 5  |
| 22 ZK829.4 | MVDFYFNK             | 50  | 11424 | 2.27  | 0.05 | 2  |
| 7 ZK829.4  | MLLASVQESLSK         | 57  | 1565  | 2.33  | 0.11 | 5  |
| 10 ZK829.4 | MVGLDTGLAGK          | 101 | 5486  | 2.35  | 0.06 | 3  |
| 22 ZK829.4 | MLLASVQESLSK         | 35  | 1666  | 2.36  | 0.19 | 8  |
| 7 ZK829.4  | GLEVFTNDADYMK        | 63  | 7024  | 2.38  | 0.08 | 3  |
| 10 ZK829.4 | MVDFYFNK             | 47  | 3039  | 2.38  | 0.06 | 3  |
| 22 ZK829.4 | MVGLDTGLAGK          | 55  | 12068 | 2.40  | 0.24 | 10 |
| 7 ZK829.4  | NFDPFTELMYEK         | 32  | 1154  | 2.40  | 0.12 | 5  |
| 7 ZK829.4  | MLLASVQESLSK         | 79  | 12730 | 2.45  | 0.11 | 4  |
| 7 ZK829.4  | MVDFYFNK             | 45  | 4345  | 2.48  | 0.14 | 6  |
| 7 ZK829.4  | MVDFYFNK             | 49  | 3449  | 2.48  | 0.14 | 6  |
| 7 ZK829.4  | MVDFYFNK             | 31  | 1143  | 2.52  | 0.27 | 11 |
| 1 ZK829.4  | MVGLDTGLAGK          | 111 | 9282  | 2.57  | 0.17 | 6  |
| 10 ZK829.4 | MVDFYFNK             | 38  | 2536  | 2.60  | 0.05 | 2  |
| 1 ZK829.4  | MVGLDTGLAGK          | 104 | 6096  | 2.68  | 0.21 | 8  |
| 22 ZK829.4 | MVGLDTGLAGK          | 108 | 5643  | 2.70  | 0.15 | 6  |
| 7 ZK829.4  | MVDFYFNK             | 45  | 6342  | 2.79  | 0.10 | 4  |
| 7 ZK829.4  | MLLASVQESLSK         | 50  | 2041  | 2.84  | 0.13 | 5  |
| 10 ZK829.4 | NLNHVSYGRLTFK        | 22  | 13971 | 2.95  | 0.13 | 4  |
| 10 ZK829.4 | MLLASVQESLSK         | 88  | 2264  | 2.99  | 0.14 | 5  |
| 1 ZK829.4  | MVDFYFNK             | 44  | 1214  | 3.04  | 0.09 | 3  |
| 1 ZK829.4  | CAVVDVPFGGAK         | 22  | 1967  | 3.09  | 0.07 | 2  |
| 1 ZK829.4  | GLEVFTNDADYMK        | 69  | 2577  | 3.36  | 0.15 | 4  |
| 7 ZK829.4  | MVDFYFNK             | 39  | 4116  | 3.38  | 0.05 | 2  |
| 1 ZK829.4  | GLEVFTNDADYMK        | 68  | 3975  | 3.53  | 0.19 | 5  |
| 10 ZK829.4 | MVGLDTGLAGK          | 131 | 11464 | 3.54  | 0.09 | 3  |
| 7 ZK829.4  | MVDFYFNK             | 23  | 506   | 3.65  | 0.25 | 7  |
| 1 ZK829.4  | DCPVEPNAAFAAK        | 38  | 4055  | 3.76  | 0.53 | 14 |
| 10 ZK829.4 | DCPVEPNAAFAAK        | 27  | 4915  | 4.20  | 0.69 | 16 |
| 22 ZK829.4 | MVDFYFNK             | 30  | 3585  | 4.32  | 0.04 | 1  |
| 22 ZK829.4 | MVDFYFNK             | 38  | 3132  | 4.54  | 0.05 | 1  |
| 7 ZK829.4  | MVDFYFNK             | 34  | 1671  | 5.29  | 0.29 | 5  |
| 22 ZK829.4 | CDIFVPAACEK          | 36  | 4073  | 7.61  | 0.33 | 4  |
| 10 ZK829.4 | CDIFVPAACEK          | 26  | 6070  | 8.31  | 0.35 | 4  |
| 10 ZK829.4 | NLVSGILGAIKPVNK      | 28  | 2644  | 8.47  | 0.20 | 2  |
| 22 ZK829.4 | VIGIQEYDCAVYNPDGIHPK | 17  | 7680  | 9.10  | 0.40 | 4  |
| 22 ZK829.4 | DCPVEPNAAFAAK        | 45  | 8326  | 9.62  | 0.92 | 10 |
| 10 ZK829.4 | DCPVEPNAAFAAK        | 21  | 3295  | 9.70  | 0.38 | 4  |
| 7 ZK829.4  | DCPVEPNAAFAAK        | 23  | 3212  | 10.04 | 0.74 | 7  |
| 10 ZK829.4 | DCPVEPNAAFAAK        | 33  | 3570  | 11.28 | 0.65 | 6  |
| 10 ZK829.4 | CAVVDVPFGGAK         | 21  | 2431  | 13.35 | 0.27 | 2  |
| 7 ZK829.4  | CAVVDVPFGGAK         | 29  | 2017  | 13.48 | 0.24 | 2  |
| 7 ZK829.4  | NLVSGILGAIKPVNK      | 32  | 3048  | 19.26 | 0.57 | 3  |
| 7 ZK829.4  | CAVVDVPFGGAK         | 45  | 2884  | 21.07 | 0.29 | 1  |
| 10 ZK829.4 | CAVVDVPFGGAK         | 48  | 18122 | 25.67 | 0.43 | 2  |
| 22 ZK829.4 | CAVVDVPFGGAK         | 35  | 41195 | 27.45 | 0.54 | 2  |
| 7 ZK829.4  | CAVVDVPFGGAK         | 55  | 15417 | 65.91 | 0.17 | 0  |
| 7 ZK909.3  | LYNLRDLERK           | 13  | 2066  | 0.49  | 0.25 | 52 |
| 7 ZK909.3  | RVNEYFK              | 17  | 788   | 0.73  | 0.33 | 46 |
| 7 ZK909.3  | RVNEYFK              | 11  | 1444  | 0.74  | 0.13 | 17 |
| 22 ZK945.2 | IEELDVNQLVK          | 71  | 2896  | 0.45  | 0.10 | 22 |
| 10 ZK945.2 | NYAYGEAMK            | 19  | 7588  | 0.50  | 0.08 | 16 |
| 10 ZK945.2 | NYAYGEAMK            | 24  | 7772  | 0.54  | 0.11 | 21 |
| 10 ZK945.2 | NYAYGEAMK            | 12  | 7431  | 0.55  | 0.14 | 25 |
| 22 ZK945.2 | QTGGRLFLVEPSGLNYEYK  | 41  | 3927  | 0.59  | 0.11 | 19 |
| 22 ZK945.2 | IEELDVNQLVK          | 50  | 2299  | 0.63  | 0.06 | 9  |
| 22 ZK945.2 | QTGGRLFLVEPSGLNYEYK  | 41  | 4231  | 0.63  | 0.10 | 16 |
| 22 ZK945.2 | AVDNAGTMIAIRGK       | 63  | 3721  | 0.64  | 0.29 | 45 |
| 10 ZK945.2 | NYAYGEAMK            | 20  | 7883  | 0.65  | 0.12 | 18 |
| 10 ZK945.2 | QTGGRLFLVEPSGLNYEYK  | 14  | 6399  | 0.65  | 0.12 | 19 |
| 22 ZK945.2 | NYAYGEAMK            | 36  | 2986  | 0.68  | 0.15 | 22 |
| 7 ZK945.2  | AVDNAGTMIAIRGK       | 48  | 2958  | 0.73  | 0.38 | 52 |
| 1 ZK945.2  | IEELDVNQLVK          | 22  | 1213  | 0.74  | 0.22 | 30 |
| 10 ZK945.2 | AVDNAGTMIAIRGK       | 15  | 3307  | 0.75  | 0.22 | 29 |
| 10 ZK945.2 | QTGGRLFLVEPSGLNYEYK  | 11  | 5397  | 0.77  | 0.11 | 14 |
| 7 ZK945.2  | AVDNAGTMIAIRGK       | 41  | 3007  | 0.80  | 0.23 | 28 |
| 7 ZK945.2  | AVDNAGTMIAIRGK       | 15  | 1652  | 0.86  | 0.26 | 30 |

|            |                      |    |      |      |      |     |
|------------|----------------------|----|------|------|------|-----|
| 7 ZK945.2  | AVDNAGTMIAIRGK       | 31 | 1304 | 0.88 | 0.21 | 24  |
| 7 ZK945.2  | NYAYGEAMK            | 22 | 1994 | 0.89 | 0.13 | 14  |
| 7 ZK945.2  | NYAYGEAMK            | 21 | 2374 | 0.93 | 0.19 | 20  |
| 22 ZK945.2 | EAARIIMVVRDENK       | 24 | 3813 | 0.96 | 0.19 | 19  |
| 1 ZK945.2  | AVDNAGTMIAIRGK       | 48 | 5769 | 0.97 | 0.14 | 15  |
| 7 ZK945.2  | QTGGRLFLVEPSGLNYEYK  | 12 | 3047 | 0.97 | 0.15 | 15  |
| 1 ZK945.2  | NYAYGEAMK            | 31 | 2725 | 1.00 | 0.06 | 6   |
| 1 ZK945.2  | QTGGRLFLVEPSGLNYEYK  | 12 | 2948 | 1.02 | 0.19 | 18  |
| 1 ZK945.2  | NYAYGEAMK            | 32 | 3643 | 1.07 | 0.14 | 13  |
| 1 ZK945.2  | QTGGRLFLVEPSGLNYEYK  | 21 | 3488 | 1.09 | 0.24 | 22  |
| 1 ZK945.2  | EAARIIMVVRDENK       | 14 | 5205 | 1.15 | 0.18 | 16  |
| 1 ZK945.2  | AVDNAGTMIAIRGK       | 70 | 3084 | 1.23 | 0.11 | 9   |
| 1 ZK945.2  | EAARIIMVVRDENK       | 12 | 4229 | 1.30 | 0.11 | 9   |
| 22 ZK945.2 | NGVVVVADK            | 28 | 1363 | 1.34 | 0.46 | 34  |
| 22 ZK945.2 | NGVVVVADK            | 28 | 1208 | 1.48 | 0.16 | 11  |
| 7 ZK945.2  | AVDNAGTMIAIRGK       | 74 | 3401 | 1.95 | 0.07 | 4   |
| 7 ZK945.2  | NYAYGEAMK            | 12 | 1339 | 2.19 | 0.14 | 6   |
| 22 ZK945.2 | AVDNAGTMIAIRGK       | 28 | 1948 | 2.80 | 0.59 | 21  |
| 10 ZK973.6 | RLGDALDDAEK          | 36 | 4661 | 0.10 | 0.06 | 55  |
| 10 ZK973.6 | RLGDALDDAEK          | 50 | 5543 | 0.10 | 0.10 | 93  |
| 10 ZK973.6 | FVSDLEK              | 23 | 2044 | 0.14 | 0.16 | 119 |
| 10 ZK973.6 | FVSDLEK              | 14 | 1054 | 0.17 | 0.28 | 167 |
| 10 ZK973.6 | RLGDALDDAEK          | 18 | 2913 | 0.18 | 0.22 | 117 |
| 7 ZK973.6  | LAALAAFNAARK         | 41 | 1495 | 0.20 | 0.28 | 138 |
| 10 ZK973.6 | AAAVNEIAPK           | 47 | 4099 | 0.21 | 0.09 | 45  |
| 10 ZK973.6 | RLGDALDDAEK          | 46 | 5235 | 0.22 | 0.08 | 35  |
| 7 ZK973.6  | AVAPSSLISHDDLVVGLPEK | 29 | 2317 | 0.22 | 0.31 | 139 |
| 7 ZK973.6  | RLGDALDDAEK          | 32 | 2384 | 0.23 | 0.33 | 144 |
| 10 ZK973.6 | FVSDLEK              | 18 | 1155 | 0.23 | 0.17 | 74  |
| 10 ZK973.6 | EITNSLKPEEAPELLAK    | 44 | 1966 | 0.24 | 0.12 | 48  |
| 10 ZK973.6 | QLLEDVENQK           | 59 | 1786 | 0.24 | 0.16 | 66  |
| 10 ZK973.6 | QLLEDVENQK           | 69 | 2173 | 0.25 | 0.13 | 50  |
| 10 ZK973.6 | NVEDVVS              | 26 | 1040 | 0.25 | 0.34 | 133 |
| 7 ZK973.6  | RLGDALDDAEK          | 30 | 2180 | 0.26 | 0.43 | 164 |
| 7 ZK973.6  | NENLPADDDPK          | 32 | 1247 | 0.27 | 0.06 | 21  |
| 7 ZK973.6  | TVVPSSVPALSEFK       | 13 | 1563 | 0.28 | 0.22 | 79  |
| 7 ZK973.6  | RAELEQAVK            | 49 | 1748 | 0.29 | 0.14 | 48  |
| 7 ZK973.6  | TVVPSSVPALSEFK       | 25 | 1374 | 0.30 | 0.18 | 62  |
| 7 ZK973.6  | AAAVNEIAPK           | 24 | 2085 | 0.30 | 0.13 | 41  |
| 7 ZK973.6  | LAALAAFNAARK         | 38 | 1388 | 0.31 | 0.16 | 51  |
| 7 ZK973.6  | AAAVNEIAPK           | 26 | 1341 | 0.33 | 0.34 | 103 |
| 1 ZK973.6  | RAELEQAVK            | 11 | 419  | 0.33 | 0.14 | 42  |
| 10 ZK973.6 | AVAPSSLISHDDLVVGLPEK | 23 | 2398 | 0.34 | 0.16 | 46  |
| 22 ZK973.6 | TVVPSSVPALSEFK       | 29 | 2014 | 0.36 | 0.10 | 29  |
| 22 ZK973.6 | FVSDLEK              | 33 | 2049 | 0.36 | 0.09 | 26  |
| 10 ZK973.6 | NVEDVVS              | 28 | 855  | 0.38 | 0.17 | 44  |
| 22 ZK973.6 | TVVPSSVPALSEFK       | 19 | 2410 | 0.38 | 0.20 | 52  |
| 22 ZK973.6 | LAALAAFNAARK         | 47 | 1558 | 0.39 | 0.17 | 44  |
| 10 ZK973.6 | AAAVNEIAPK           | 19 | 2010 | 0.39 | 0.16 | 41  |
| 10 ZK973.6 | LAALAAFNAARK         | 25 | 937  | 0.40 | 0.14 | 36  |
| 10 ZK973.6 | AVAPSSLISHDDLVVGLPEK | 11 | 2226 | 0.42 | 0.11 | 27  |
| 10 ZK973.6 | QLLEDVENQK           | 48 | 2312 | 0.42 | 0.11 | 26  |
| 22 ZK973.6 | ELLQALEK             | 48 | 2066 | 0.42 | 0.12 | 29  |
| 10 ZK973.6 | LQTELDIAK            | 21 | 1207 | 0.42 | 0.15 | 36  |
| 10 ZK973.6 | AVAPSSLISHDDLVVGLPEK | 17 | 3075 | 0.43 | 0.13 | 30  |
| 22 ZK973.6 | RLGDALDDAEK          | 26 | 2905 | 0.43 | 0.21 | 48  |
| 7 ZK973.6  | AAAVNEIAPK           | 14 | 785  | 0.43 | 0.13 | 29  |
| 7 ZK973.6  | AAAVNEIAPK           | 33 | 2331 | 0.44 | 0.13 | 31  |
| 10 ZK973.6 | LQTELDIAK            | 14 | 1093 | 0.44 | 0.17 | 38  |
| 10 ZK973.6 | LNNANDIAK            | 18 | 1440 | 0.44 | 0.15 | 35  |
| 1 ZK973.6  | AAAVNEIAPK           | 20 | 546  | 0.45 | 0.09 | 20  |
| 10 ZK973.6 | SQWDLRLK             | 23 | 2935 | 0.46 | 0.10 | 23  |
| 1 ZK973.6  | AAAVNEIAPK           | 19 | 639  | 0.46 | 0.18 | 39  |
| 10 ZK973.6 | ELLQALEK             | 41 | 2085 | 0.47 | 0.10 | 22  |
| 22 ZK973.6 | RVGDEARSAHDQIVALEK   | 14 | 5464 | 0.47 | 0.29 | 62  |
| 7 ZK973.6  | AAAVNEIAPK           | 23 | 1225 | 0.48 | 0.57 | 119 |
| 10 ZK973.6 | QLLEDVENQK           | 52 | 2323 | 0.48 | 0.10 | 21  |
| 22 ZK973.6 | RAELEQAVK            | 30 | 2869 | 0.49 | 0.13 | 26  |
| 10 ZK973.6 | QSASQVANEIDDISK      | 96 | 2267 | 0.49 | 0.19 | 39  |
| 22 ZK973.6 | RLGDALDDAEK          | 34 | 1928 | 0.50 | 0.10 | 21  |
| 22 ZK973.6 | TVVPSSVPALSEFK       | 23 | 2420 | 0.51 | 0.09 | 17  |
| 10 ZK973.6 | LAALAAFNAARK         | 40 | 1304 | 0.51 | 0.21 | 41  |
| 7 ZK973.6  | ELLQALEK             | 26 | 1663 | 0.51 | 0.35 | 69  |
| 1 ZK973.6  | LNNANDIAK            | 16 | 550  | 0.52 | 0.06 | 12  |
| 7 ZK973.6  | AAAVNEIAPK           | 16 | 658  | 0.53 | 0.23 | 45  |
| 1 ZK973.6  | AQINRIK              | 10 | 1643 | 0.53 | 0.13 | 25  |
| 22 ZK973.6 | RLGDALDDAEK          | 36 | 3416 | 0.53 | 0.07 | 13  |
| 10 ZK973.6 | LNNANDIAK            | 18 | 1415 | 0.53 | 0.19 | 36  |
| 10 ZK973.6 | SQWDLRLK             | 14 | 1057 | 0.54 | 0.15 | 28  |
| 10 ZK973.6 | QSASQVANEIDDISK      | 97 | 1859 | 0.54 | 0.19 | 35  |
| 10 ZK973.6 | ELLQALEK             | 20 | 2156 | 0.54 | 0.12 | 22  |
| 10 ZK973.6 | SQWDLRLK             | 22 | 2687 | 0.54 | 0.13 | 23  |
| 22 ZK973.6 | RAELEQAVK            | 43 | 3251 | 0.55 | 0.15 | 27  |
| 1 ZK973.6  | TVVPSSVPALSEFK       | 11 | 1081 | 0.56 | 0.10 | 17  |
| 7 ZK973.6  | RLGDALDDAEK          | 35 | 3450 | 0.56 | 0.05 | 9   |
| 1 ZK973.6  | YQNQPQLDVAK          | 24 | 959  | 0.56 | 0.25 | 45  |
| 10 ZK973.6 | LNNANDIAK            | 45 | 3060 | 0.57 | 0.10 | 17  |
| 22 ZK973.6 | TVVPSSVPALSEFK       | 27 | 2432 | 0.58 | 0.11 | 19  |
| 10 ZK973.6 | TVVPSSVPALSEFK       | 35 | 3556 | 0.58 | 0.12 | 21  |
| 10 ZK973.6 | AQINRIK              | 10 | 1637 | 0.58 | 0.12 | 21  |
| 7 ZK973.6  | RLGDALDDAEK          | 33 | 3686 | 0.58 | 0.13 | 23  |
| 1 ZK973.6  | LNNANDIAK            | 15 | 592  | 0.58 | 0.12 | 21  |
| 7 ZK973.6  | LQTELDIAK            | 50 | 1430 | 0.58 | 0.15 | 25  |
| 10 ZK973.6 | AVAPSSLISHDDLVVGLPEK | 26 | 3063 | 0.59 | 0.07 | 11  |
| 10 ZK973.6 | QSASQVANEIDDISK      | 81 | 1512 | 0.59 | 0.16 | 27  |
| 1 ZK973.6  | LNNANDIAK            | 18 | 872  | 0.60 | 0.14 | 23  |
| 10 ZK973.6 | QSASQVANEIDDISK      | 90 | 2410 | 0.60 | 0.24 | 40  |
| 1 ZK973.6  | AAAVNEIAPK           | 22 | 521  | 0.60 | 0.25 | 42  |
| 22 ZK973.6 | EITNSLKPEEAPELLAK    | 66 | 2734 | 0.61 | 0.32 | 53  |
| 10 ZK973.6 | SPDELDIAK            | 19 | 1189 | 0.61 | 0.15 | 25  |
| 22 ZK973.6 | QLLEDVENQK           | 52 | 1358 | 0.61 | 0.13 | 21  |

|            |                      |     |      |      |      |    |
|------------|----------------------|-----|------|------|------|----|
| 10 ZK973.6 | LAALAAFNAARK         | 11  | 1361 | 0.62 | 0.19 | 30 |
| 10 ZK973.6 | ATVEQLTK             | 15  | 2868 | 0.62 | 0.34 | 55 |
| 10 ZK973.6 | FVSDLEK              | 34  | 1304 | 0.62 | 0.25 | 41 |
| 10 ZK973.6 | EITNSLKPEEAEPLAK     | 37  | 1768 | 0.62 | 0.27 | 44 |
| 1 ZK973.6  | MIDSTDPERSILDTIAK    | 15  | 882  | 0.63 | 0.24 | 38 |
| 1 ZK973.6  | QSASQVANEIDDISK      | 79  | 1227 | 0.63 | 0.22 | 35 |
| 22 ZK973.6 | EITNSLKPEEAEPLAK     | 82  | 2431 | 0.63 | 0.18 | 29 |
| 10 ZK973.6 | TVVPSSVPALSEFK       | 44  | 3846 | 0.63 | 0.08 | 12 |
| 10 ZK973.6 | LNNANDAIK            | 40  | 3921 | 0.65 | 0.13 | 20 |
| 22 ZK973.6 | LLDTVSGVKPDELDDK     | 59  | 1996 | 0.66 | 0.17 | 25 |
| 22 ZK973.6 | FVSDLEK              | 32  | 2652 | 0.67 | 0.24 | 35 |
| 1 ZK973.6  | AAAVNEIAPK           | 13  | 610  | 0.69 | 0.23 | 34 |
| 1 ZK973.6  | YQNQPQLDVAK          | 14  | 853  | 0.70 | 0.41 | 59 |
| 10 ZK973.6 | LQTELDDAIK           | 75  | 1578 | 0.70 | 0.13 | 18 |
| 1 ZK973.6  | YQNQPQLDVAK          | 34  | 1292 | 0.70 | 0.35 | 49 |
| 1 ZK973.6  | RLGDALDDAEK          | 40  | 2618 | 0.72 | 0.08 | 11 |
| 7 ZK973.6  | QLLEDVENQK           | 25  | 732  | 0.73 | 0.12 | 16 |
| 7 ZK973.6  | QLLEDVENQK           | 57  | 1624 | 0.73 | 0.16 | 22 |
| 22 ZK973.6 | EQLILSLK             | 39  | 1831 | 0.74 | 0.10 | 14 |
| 22 ZK973.6 | LLDTVSGVKPDELDDK     | 42  | 1923 | 0.75 | 0.25 | 33 |
| 1 ZK973.6  | LQTELDDAIK           | 31  | 755  | 0.75 | 0.13 | 17 |
| 1 ZK973.6  | LNNANDAIK            | 41  | 1134 | 0.75 | 0.10 | 13 |
| 1 ZK973.6  | AVAPSSLISHDDLVVGLPEK | 28  | 7687 | 0.75 | 0.15 | 21 |
| 1 ZK973.6  | RAELEQAVK            | 40  | 415  | 0.76 | 0.20 | 26 |
| 1 ZK973.6  | LQTELDDAIK           | 46  | 1033 | 0.76 | 0.20 | 26 |
| 1 ZK973.6  | ELLQALEK             | 49  | 1807 | 0.76 | 0.18 | 23 |
| 1 ZK973.6  | RLGDALDDAEK          | 17  | 2531 | 0.77 | 0.18 | 24 |
| 1 ZK973.6  | QLLEDVENQK           | 25  | 1439 | 0.77 | 0.15 | 19 |
| 7 ZK973.6  | FVSDLEK              | 17  | 1582 | 0.79 | 0.15 | 19 |
| 22 ZK973.6 | QSASQVANEIDDISK      | 74  | 1642 | 0.79 | 0.18 | 23 |
| 22 ZK973.6 | ELLQALEK             | 47  | 2227 | 0.79 | 0.10 | 13 |
| 7 ZK973.6  | LQTELDDAIK           | 73  | 1644 | 0.79 | 0.11 | 13 |
| 7 ZK973.6  | ELLQALEK             | 50  | 2388 | 0.79 | 0.09 | 11 |
| 7 ZK973.6  | SPQEMIDELSAK         | 20  | 1963 | 0.81 | 0.14 | 17 |
| 1 ZK973.6  | LNISQFEQIPLDQLK      | 49  | 1504 | 0.81 | 0.13 | 16 |
| 1 ZK973.6  | AEQLVSNLEAFVK        | 52  | 1597 | 0.82 | 0.18 | 22 |
| 1 ZK973.6  | AEQLVSNLEAFVK        | 84  | 1748 | 0.82 | 0.10 | 12 |
| 10 ZK973.6 | AAAVNEIAPK           | 39  | 3103 | 0.82 | 0.15 | 18 |
| 7 ZK973.6  | LQTELDDAIK           | 40  | 1317 | 0.83 | 0.14 | 16 |
| 1 ZK973.6  | NVEDVVSK             | 48  | 1024 | 0.83 | 0.11 | 14 |
| 7 ZK973.6  | DRIVNADASRK          | 12  | 2859 | 0.83 | 0.47 | 57 |
| 10 ZK973.6 | ELLQALEK             | 56  | 2704 | 0.83 | 0.10 | 12 |
| 22 ZK973.6 | ELLQALEK             | 31  | 1794 | 0.84 | 0.11 | 13 |
| 10 ZK973.6 | ELLQALEK             | 60  | 3050 | 0.85 | 0.16 | 19 |
| 10 ZK973.6 | QSASQVANEIDDISK      | 78  | 2110 | 0.85 | 0.09 | 11 |
| 22 ZK973.6 | QSASQVANEIDDISK      | 110 | 2220 | 0.85 | 0.19 | 23 |
| 1 ZK973.6  | QSASQVANEIDDISK      | 87  | 1755 | 0.85 | 0.15 | 17 |
| 1 ZK973.6  | AVAPSSLISHDDLVVGLPEK | 34  | 5291 | 0.86 | 0.15 | 17 |
| 10 ZK973.6 | TVVPSSVPALSEFK       | 21  | 1535 | 0.86 | 0.10 | 11 |
| 22 ZK973.6 | QSASQVANEIDDISK      | 95  | 2484 | 0.86 | 0.13 | 15 |
| 1 ZK973.6  | SPQEMIDELSAK         | 14  | 1190 | 0.88 | 0.31 | 35 |
| 22 ZK973.6 | QSASQVANEIDDISK      | 75  | 1343 | 0.89 | 0.26 | 30 |
| 7 ZK973.6  | AVAPSSLISHDDLVVGLPEK | 17  | 4224 | 0.90 | 0.10 | 11 |
| 10 ZK973.6 | AAAVNEIAPK           | 42  | 2947 | 0.90 | 0.11 | 12 |
| 22 ZK973.6 | LQTELDDAIK           | 57  | 2106 | 0.91 | 0.15 | 17 |
| 1 ZK973.6  | MIDSTDPERSILDTIAK    | 18  | 1011 | 0.91 | 0.16 | 18 |
| 22 ZK973.6 | TVVPSSVPALSEFK       | 35  | 4454 | 0.91 | 0.10 | 11 |
| 1 ZK973.6  | ELLQALEK             | 58  | 1984 | 0.92 | 0.13 | 14 |
| 22 ZK973.6 | QSASQVANEIDDISK      | 102 | 3106 | 0.92 | 0.21 | 23 |
| 7 ZK973.6  | AVAPSSLISHDDLVVGLPEK | 38  | 4176 | 0.92 | 0.18 | 19 |
| 10 ZK973.6 | TVVPSSVPALSEFK       | 22  | 2003 | 0.93 | 0.06 | 7  |
| 10 ZK973.6 | LQTELDDAIK           | 46  | 1101 | 0.93 | 0.18 | 20 |
| 10 ZK973.6 | MIDSTDPERSILDTIAK    | 16  | 791  | 0.93 | 0.20 | 21 |
| 22 ZK973.6 | LNNANDAIK            | 25  | 2822 | 0.94 | 0.14 | 15 |
| 22 ZK973.6 | FVSDLEK              | 24  | 2679 | 0.95 | 0.15 | 15 |
| 7 ZK973.6  | LNNANDAIK            | 40  | 3660 | 0.95 | 0.13 | 14 |
| 22 ZK973.6 | TVVPSSVPALSEFK       | 38  | 5889 | 0.95 | 0.09 | 9  |
| 22 ZK973.6 | LQTELDDAIK           | 62  | 1584 | 0.96 | 0.12 | 12 |
| 22 ZK973.6 | QLGSAVGDK            | 18  | 1701 | 0.96 | 0.11 | 12 |
| 10 ZK973.6 | SAIHLLDDQK           | 12  | 862  | 0.96 | 0.09 | 10 |
| 22 ZK973.6 | ELLQALEK             | 54  | 2364 | 0.96 | 0.16 | 16 |
| 10 ZK973.6 | TVVPSSVPALSEFK       | 15  | 1542 | 0.97 | 0.14 | 15 |
| 10 ZK973.6 | RAELEQAVK            | 45  | 3328 | 0.98 | 0.10 | 10 |
| 22 ZK973.6 | FVSDLEK              | 39  | 3417 | 0.99 | 0.19 | 19 |
| 22 ZK973.6 | RVGDEARSAHDQIVALEK   | 11  | 4520 | 0.99 | 0.26 | 26 |
| 1 ZK973.6  | ATVEQLTK             | 33  | 1709 | 0.99 | 0.29 | 29 |
| 1 ZK973.6  | AVAPSSLISHDDLVVGLPEK | 15  | 2766 | 0.99 | 0.14 | 14 |
| 10 ZK973.6 | VFQLQHAIDDK          | 33  | 1239 | 1.01 | 0.17 | 17 |
| 22 ZK973.6 | LAALAAFNAARK         | 38  | 2654 | 1.01 | 0.10 | 10 |
| 10 ZK973.6 | SPQEMIDELSAK         | 26  | 3121 | 1.01 | 0.17 | 17 |
| 7 ZK973.6  | TVVPSSVPALSEFK       | 36  | 2532 | 1.02 | 0.09 | 9  |
| 1 ZK973.6  | TVVPSSVPALSEFK       | 24  | 2080 | 1.03 | 0.09 | 9  |
| 7 ZK973.6  | LNNANDAIK            | 38  | 3161 | 1.03 | 0.11 | 11 |
| 22 ZK973.6 | QSASQVANEIDDISK      | 90  | 1854 | 1.04 | 0.14 | 13 |
| 22 ZK973.6 | ELLQALEK             | 63  | 2916 | 1.05 | 0.06 | 6  |
| 10 ZK973.6 | YQNQPQLDVAK          | 64  | 3068 | 1.06 | 0.25 | 23 |
| 22 ZK973.6 | QSASQVANEIDDISK      | 91  | 3268 | 1.06 | 0.15 | 14 |
| 10 ZK973.6 | QSASQVANEIDDISK      | 62  | 1532 | 1.07 | 0.09 | 8  |
| 1 ZK973.6  | TVVPSSVPALSEFK       | 42  | 2513 | 1.07 | 0.13 | 13 |
| 22 ZK973.6 | QLLEDVENQK           | 50  | 2936 | 1.07 | 0.17 | 15 |
| 22 ZK973.6 | NVEDVVSK             | 56  | 2444 | 1.08 | 0.06 | 6  |
| 10 ZK973.6 | SPQEMIDELSAK         | 15  | 1673 | 1.08 | 0.19 | 18 |
| 7 ZK973.6  | QLLEDVENQK           | 29  | 1179 | 1.08 | 0.16 | 15 |
| 10 ZK973.6 | EITNSLKPEEAEPLAK     | 26  | 5562 | 1.10 | 0.13 | 12 |
| 7 ZK973.6  | LAALAAFNAARK         | 71  | 2463 | 1.11 | 0.14 | 13 |
| 22 ZK973.6 | SPQEMIDELSAK         | 33  | 1523 | 1.11 | 0.13 | 12 |
| 1 ZK973.6  | QLLEDVENQK           | 39  | 1700 | 1.11 | 0.09 | 8  |
| 22 ZK973.6 | AVAPSSLISHDDLVVGLPEK | 30  | 2838 | 1.13 | 0.16 | 14 |
| 1 ZK973.6  | LNISQFEQIPLDQLK      | 43  | 1415 | 1.13 | 0.14 | 12 |
| 22 ZK973.6 | AQINRIK              | 18  | 1973 | 1.13 | 0.12 | 11 |
| 7 ZK973.6  | TVVPSSVPALSEFK       | 25  | 2760 | 1.14 | 0.12 | 11 |

|            |                           |     |      |      |      |    |
|------------|---------------------------|-----|------|------|------|----|
| 10 ZK973.6 | EQLILSLK                  | 68  | 4146 | 1.14 | 0.16 | 14 |
| 10 ZK973.6 | LAALAAFNAARK              | 19  | 1616 | 1.14 | 0.10 | 9  |
| 22 ZK973.6 | RLGDALDDAEK               | 46  | 3779 | 1.15 | 0.05 | 4  |
| 10 ZK973.6 | RAELEQAVK                 | 19  | 2433 | 1.15 | 0.12 | 11 |
| 22 ZK973.6 | RLGDALDDAEK               | 35  | 2760 | 1.15 | 0.10 | 8  |
| 10 ZK973.6 | EQLILSLK                  | 72  | 3436 | 1.17 | 0.10 | 9  |
| 7 ZK973.6  | EITNSLKPEEAEPLAK          | 31  | 5278 | 1.18 | 0.05 | 4  |
| 10 ZK973.6 | EITNSLKPEEAEPLAK          | 40  | 7000 | 1.18 | 0.11 | 9  |
| 7 ZK973.6  | EITNSLKPEEAEPLAK          | 18  | 4735 | 1.20 | 0.13 | 11 |
| 22 ZK973.6 | QLLEDVENQK                | 40  | 2387 | 1.20 | 0.14 | 12 |
| 22 ZK973.6 | DRIVNADASRK               | 12  | 2346 | 1.21 | 0.23 | 19 |
| 7 ZK973.6  | EQLILSLK                  | 62  | 3847 | 1.22 | 0.13 | 10 |
| 1 ZK973.6  | NVEDVVSK                  | 42  | 887  | 1.22 | 0.21 | 17 |
| 22 ZK973.6 | DRIVNADASRK               | 13  | 3585 | 1.23 | 0.15 | 13 |
| 1 ZK973.6  | RAELEQAVK                 | 15  | 649  | 1.24 | 0.15 | 12 |
| 7 ZK973.6  | QSASQVANEIDDISK           | 82  | 2266 | 1.24 | 0.17 | 13 |
| 22 ZK973.6 | YQNQPQPLDVAK              | 32  | 2685 | 1.25 | 0.13 | 10 |
| 22 ZK973.6 | SPQEMIDELSAK              | 32  | 1906 | 1.25 | 0.11 | 9  |
| 7 ZK973.6  | SPQEMIDELSAK              | 22  | 1604 | 1.26 | 0.18 | 14 |
| 10 ZK973.6 | LAALAAFNAARK              | 61  | 2638 | 1.26 | 0.19 | 15 |
| 1 ZK973.6  | AVAPSSLISHDDLVVGLPEK      | 20  | 2754 | 1.26 | 0.19 | 15 |
| 22 ZK973.6 | QLGSAVGDK                 | 50  | 3044 | 1.28 | 0.09 | 7  |
| 7 ZK973.6  | TVVPSSVPALSEFK            | 13  | 1662 | 1.29 | 0.19 | 15 |
| 22 ZK973.6 | LAALAAFNAARK              | 55  | 2176 | 1.29 | 0.11 | 8  |
| 22 ZK973.6 | AAAVNEIAPK                | 24  | 1908 | 1.30 | 0.15 | 11 |
| 10 ZK973.6 | DRIVNADASRK               | 19  | 3751 | 1.30 | 0.18 | 14 |
| 22 ZK973.6 | TVVPSSVPALSEFK            | 22  | 2833 | 1.30 | 0.13 | 10 |
| 10 ZK973.6 | YQNQPQPLDVAK              | 59  | 2948 | 1.31 | 0.14 | 10 |
| 22 ZK973.6 | NVEDVVSK                  | 55  | 1916 | 1.31 | 0.16 | 12 |
| 1 ZK973.6  | DRIVNADASRK               | 21  | 4817 | 1.32 | 0.39 | 29 |
| 22 ZK973.6 | RVGDEARSAHDQIVALEK        | 16  | 4983 | 1.34 | 0.15 | 11 |
| 7 ZK973.6  | QSASQVANEIDDISK           | 105 | 1888 | 1.37 | 0.16 | 12 |
| 10 ZK973.6 | LAALAAFNAARK              | 28  | 1017 | 1.37 | 0.10 | 7  |
| 22 ZK973.6 | QLGSAVGDK                 | 31  | 2141 | 1.37 | 0.31 | 23 |
| 1 ZK973.6  | RVGDEARSAHDQIVALEK        | 11  | 2931 | 1.38 | 0.15 | 11 |
| 22 ZK973.6 | LAALAAFNAARK              | 35  | 2632 | 1.39 | 0.07 | 5  |
| 7 ZK973.6  | YQNQPQPLDVAK              | 38  | 2103 | 1.39 | 0.23 | 17 |
| 22 ZK973.6 | MIDSTDERSILDTIAK          | 12  | 2950 | 1.39 | 0.06 | 4  |
| 22 ZK973.6 | RSAEAAQDVENLRNNSQQLSDLDNK | 66  | 2544 | 1.39 | 0.29 | 21 |
| 10 ZK973.6 | LAALAAFNAARK              | 53  | 1209 | 1.39 | 0.05 | 4  |
| 22 ZK973.6 | SQWDLURLK                 | 19  | 1702 | 1.40 | 0.12 | 9  |
| 22 ZK973.6 | RVGDEARSAHDQIVALEK        | 10  | 7109 | 1.45 | 0.09 | 6  |
| 22 ZK973.6 | YQNQPQPLDVAK              | 43  | 2215 | 1.46 | 0.15 | 10 |
| 22 ZK973.6 | SPQEMIDELSAK              | 16  | 1775 | 1.46 | 0.10 | 7  |
| 22 ZK973.6 | MIDSTDERSILDTIAK          | 21  | 2085 | 1.47 | 0.11 | 8  |
| 10 ZK973.6 | LAALAAFNAARK              | 44  | 2778 | 1.47 | 0.10 | 7  |
| 1 ZK973.6  | EQLILSLK                  | 69  | 3182 | 1.51 | 0.08 | 6  |
| 22 ZK973.6 | LAALAAFNAARK              | 67  | 2740 | 1.51 | 0.14 | 9  |
| 1 ZK973.6  | RAELEQAVK                 | 10  | 567  | 1.54 | 0.33 | 21 |
| 7 ZK973.6  | TVVPSSVPALSEFK            | 30  | 2362 | 1.54 | 0.12 | 8  |
| 1 ZK973.6  | EQLILSLK                  | 69  | 2920 | 1.55 | 0.11 | 7  |
| 22 ZK973.6 | AQINRIK                   | 17  | 1539 | 1.56 | 0.19 | 12 |
| 22 ZK973.6 | SPQEMIDELSAK              | 13  | 1185 | 1.58 | 0.38 | 24 |
| 22 ZK973.6 | HNLENLLANLPENDPTADELRQK   | 45  | 3084 | 1.59 | 0.21 | 13 |
| 22 ZK973.6 | MIDSTDERSILDTIAK          | 11  | 2503 | 1.61 | 0.16 | 10 |
| 7 ZK973.6  | MIDSTDERSILDTIAK          | 13  | 1157 | 1.63 | 0.29 | 18 |
| 7 ZK973.6  | YQNQPQPLDVAK              | 44  | 2139 | 1.63 | 0.19 | 12 |
| 22 ZK973.6 | AVAPSSLISHDDLVVGLPEK      | 17  | 4090 | 1.65 | 0.13 | 8  |
| 7 ZK973.6  | EQLILSLK                  | 58  | 3286 | 1.65 | 0.11 | 6  |
| 22 ZK973.6 | SQWDLURLK                 | 16  | 1483 | 1.68 | 0.18 | 11 |
| 7 ZK973.6  | LAALAAFNAARK              | 47  | 2298 | 1.75 | 0.13 | 8  |
| 22 ZK973.6 | SPDELIDDLAK               | 31  | 2452 | 1.76 | 0.12 | 7  |
| 22 ZK973.6 | MIDSTDERSILDTIAK          | 33  | 2528 | 1.80 | 0.13 | 7  |
| 22 ZK973.6 | RLGDALDDAEK               | 52  | 3844 | 1.87 | 0.07 | 4  |
| 22 ZK973.6 | RLGDALDDAEK               | 23  | 3213 | 1.88 | 0.05 | 3  |
| 22 ZK973.6 | RVGDEARSAHDQIVALEK        | 14  | 5931 | 1.90 | 0.22 | 12 |
| 10 ZK973.6 | VFQLQHAIDDK               | 25  | 771  | 1.91 | 0.18 | 10 |
| 22 ZK973.6 | LNISQFEQIPLDQLK           | 28  | 625  | 1.93 | 0.11 | 6  |
| 7 ZK973.6  | SQWDLURLK                 | 12  | 778  | 1.96 | 0.09 | 5  |
| 22 ZK973.6 | LAALAAFNAARK              | 32  | 2047 | 1.97 | 0.17 | 9  |
| 22 ZK973.6 | LAALAAFNAARK              | 31  | 1726 | 1.98 | 0.16 | 8  |
| 22 ZK973.6 | AVAPSSLISHDDLVVGLPEK      | 18  | 5213 | 1.98 | 0.21 | 11 |
| 22 ZK973.6 | VFQLQHAIDDK               | 33  | 1373 | 1.99 | 0.14 | 7  |
| 22 ZK973.6 | FVSDLEK                   | 18  | 1116 | 1.99 | 0.23 | 11 |
| 7 ZK973.6  | SQWDLURLK                 | 13  | 710  | 2.00 | 0.11 | 5  |
| 10 ZK973.6 | VFQLQHAIDDK               | 26  | 956  | 2.03 | 0.07 | 3  |
| 7 ZK973.6  | AAAVNEIAPK                | 30  | 1131 | 2.03 | 0.14 | 7  |
| 7 ZK973.6  | SQWDLURLK                 | 18  | 841  | 2.06 | 0.26 | 13 |
| 22 ZK973.6 | AEQLVSNLEAFVK             | 96  | 1981 | 2.11 | 0.12 | 6  |
| 10 ZK973.6 | AAAVNEIAPK                | 41  | 2065 | 2.11 | 0.20 | 9  |
| 22 ZK973.6 | HNLENLLANLPENDPTADELRQK   | 16  | 2139 | 2.20 | 0.25 | 11 |
| 22 ZK973.6 | AVAPSSLISHDDLVVGLPEK      | 40  | 4268 | 2.28 | 0.11 | 5  |
| 22 ZK973.6 | RAELEQAVK                 | 52  | 3524 | 2.29 | 0.13 | 6  |
| 22 ZK973.6 | RAELEQAVK                 | 58  | 2680 | 2.29 | 0.13 | 6  |
| 22 ZK973.6 | FVSDLEK                   | 19  | 974  | 2.31 | 0.11 | 5  |
| 22 ZK973.6 | EITNSLKPEEAEPLAK          | 32  | 1848 | 2.37 | 0.79 | 33 |
| 7 ZK973.6  | RAELEQAVK                 | 17  | 740  | 2.39 | 0.30 | 13 |
| 22 ZK973.6 | AEQLVSNLEAFVK             | 75  | 1458 | 2.48 | 0.20 | 8  |
| 10 ZK973.6 | RAELEQAVK                 | 63  | 4303 | 2.49 | 0.13 | 5  |
| 22 ZK973.6 | RLGDALDDAEK               | 13  | 2373 | 2.50 | 0.18 | 7  |
| 22 ZK973.6 | LNISQFEQIPLDQLK           | 44  | 1134 | 2.53 | 0.10 | 4  |
| 7 ZK973.6  | AAAVNEIAPK                | 25  | 1112 | 2.54 | 0.17 | 7  |
| 22 ZK973.6 | AAAVNEIAPK                | 49  | 2557 | 2.55 | 0.13 | 5  |
| 22 ZK973.6 | FVSDLEK                   | 16  | 1033 | 2.56 | 0.23 | 9  |
| 22 ZK973.6 | AVAPSSLISHDDLVVGLPEK      | 15  | 2600 | 2.58 | 0.11 | 4  |
| 7 ZK973.6  | TVVPSSVPALSEFK            | 18  | 1354 | 2.60 | 0.07 | 3  |
| 22 ZK973.6 | MIDSTDERSILDTIAK          | 10  | 917  | 2.61 | 0.16 | 6  |
| 22 ZK973.6 | VFQLQHAIDDK               | 34  | 951  | 2.61 | 0.14 | 5  |
| 1 ZK973.6  | AAAVNEIAPK                | 14  | 423  | 2.62 | 0.31 | 12 |
| 22 ZK973.6 | AAAVNEIAPK                | 35  | 1121 | 2.63 | 0.12 | 5  |
| 22 ZK973.6 | ELLQALEK                  | 33  | 1685 | 2.64 | 0.11 | 4  |

|            |                      |    |      |       |      |    |
|------------|----------------------|----|------|-------|------|----|
| 7 ZK973.6  | SPDELIDDLAK          | 18 | 1364 | 2.64  | 0.12 | 4  |
| 10 ZK973.6 | AAAVNEIAPK           | 52 | 2395 | 2.65  | 0.12 | 5  |
| 22 ZK973.6 | MIDSTDPERSONSILDTIAK | 15 | 729  | 2.66  | 0.25 | 9  |
| 7 ZK973.6  | SPDELIDDLAK          | 16 | 1173 | 2.78  | 0.08 | 3  |
| 1 ZK973.6  | LAALAAFNAARK         | 42 | 1245 | 2.79  | 0.21 | 8  |
| 7 ZK973.6  | SQWDLRLK             | 17 | 775  | 2.82  | 0.30 | 11 |
| 22 ZK973.6 | SPDELIDDLAK          | 16 | 1062 | 2.84  | 0.06 | 2  |
| 22 ZK973.6 | FVSDLEK              | 17 | 1351 | 2.90  | 0.16 | 6  |
| 22 ZK973.6 | QLLEDVENQK           | 27 | 1223 | 2.91  | 0.09 | 3  |
| 10 ZK973.6 | RAELEQAVK            | 47 | 3392 | 2.93  | 0.22 | 8  |
| 22 ZK973.6 | FVSDLEK              | 17 | 674  | 2.94  | 0.21 | 7  |
| 1 ZK973.6  | AAAVNEIAPK           | 23 | 517  | 3.07  | 0.19 | 6  |
| 7 ZK973.6  | ATVEQLTK             | 10 | 1150 | 3.08  | 0.33 | 11 |
| 10 ZK973.6 | LAALAAFNAARK         | 55 | 962  | 3.08  | 0.18 | 6  |
| 10 ZK973.6 | LAALAAFNAARK         | 71 | 1864 | 3.12  | 0.10 | 3  |
| 22 ZK973.6 | TVVPSSVPALSEFK       | 16 | 1904 | 3.18  | 0.24 | 8  |
| 22 ZK973.6 | ELLQALEK             | 26 | 1395 | 3.22  | 0.22 | 7  |
| 22 ZK973.6 | EITNSLKPEEAEPLAK     | 28 | 3919 | 3.27  | 0.47 | 14 |
| 7 ZK973.6  | RAELEQAVK            | 17 | 644  | 3.28  | 0.27 | 8  |
| 22 ZK973.6 | FVSDLEK              | 24 | 1208 | 3.36  | 0.20 | 6  |
| 22 ZK973.6 | EITNSLKPEEAEPLAK     | 27 | 4225 | 3.41  | 0.30 | 9  |
| 22 ZK973.6 | EQLILSLK             | 66 | 3367 | 3.44  | 0.12 | 4  |
| 7 ZK973.6  | AAAVNEIAPK           | 20 | 861  | 3.51  | 0.37 | 10 |
| 22 ZK973.6 | RAELEQAVK            | 46 | 3846 | 3.62  | 0.16 | 5  |
| 22 ZK973.6 | EQLILSLK             | 59 | 2895 | 3.67  | 0.16 | 4  |
| 1 ZK973.6  | LAALAAFNAARK         | 43 | 982  | 3.72  | 0.51 | 14 |
| 22 ZK973.6 | LAALAAFNAARK         | 50 | 2484 | 3.97  | 0.10 | 3  |
| 10 ZK973.6 | SPDELIDDLAK          | 41 | 1379 | 3.97  | 0.33 | 8  |
| 1 ZK973.6  | RAELEQAVK            | 27 | 1109 | 4.01  | 0.27 | 7  |
| 22 ZK973.6 | AAAVNEIAPK           | 64 | 2820 | 4.37  | 0.21 | 5  |
| 22 ZK973.6 | TVVPSSVPALSEFK       | 21 | 1382 | 4.40  | 0.16 | 4  |
| 22 ZK973.6 | RAELEQAVK            | 33 | 2797 | 4.43  | 0.12 | 3  |
| 22 ZK973.6 | LAALAAFNAARK         | 54 | 1876 | 4.72  | 0.13 | 3  |
| 10 ZK973.6 | SPDELIDDLAK          | 41 | 1004 | 5.40  | 0.21 | 4  |
| 22 ZK973.6 | AAAVNEIAPK           | 45 | 2939 | 5.56  | 0.16 | 3  |
| 22 ZK973.6 | LAALAAFNAARK         | 68 | 3078 | 8.43  | 0.21 | 2  |
| 22 ZK973.6 | LAALAAFNAARK         | 58 | 1928 | 16.06 | 0.21 | 1  |

Supplementary Table S4 Statistical analysis of protein hits

| Protein group                       | Replicate 1      | Replicate 7      | Replicate 10     | Replicate 22     | Significance |
|-------------------------------------|------------------|------------------|------------------|------------------|--------------|
|                                     | Normalized Ratio | Normalized Ratio | Normalized Ratio | Normalized Ratio |              |
| B0035.3                             | 0.89             |                  | 0.83             | 0.76             | 0.2106       |
| B0035.5                             | 0.00             |                  | 0.72             | 0.58             | 0.0611       |
| B0041.4                             | 0.00             | 0.00             | 0.00             | 1.26             | 0.3436       |
| B0205.3                             | 0.00             |                  | 3.23             | 0.55             | 0.2940       |
| B0222.9                             | 0.00             | 0.00             | 1.06             | 3.31             | 0.0798       |
| B0228.4c;B0228.4e;B0228.4a;B0228.4d | 0.53             | 0.00             | 0.00             | 0.00             | 0.0167       |
| B0228.7                             |                  |                  | 0.77             |                  | 0.1545       |
| B0250.1                             | 0.00             |                  | 0.00             | 1.43             | 0.2326       |
| B0250.5                             |                  | 1.06             | 0.99             | 1.25             | 0.4788       |
| B0261.1                             | 0.00             | 0.00             | 0.00             | 2.09             | 0.0460       |
| B0272.1                             | 0.00             | 0.00             | 0.78             | 1.00             | 0.2772       |
| B0272.3                             | 1.44             | 1.44             |                  | 1.40             | 0.2347       |
| B0280.3                             |                  | 1.07             | 1.24             | 1.00             | 0.4741       |
| B0286.3                             | 0.88             | 0.76             | 0.67             |                  | 0.1499       |
| B0334.3a;B0334.3b                   | 0.00             |                  |                  | 0.84             | 0.2279       |
| B0334.3b;B0334.3a                   |                  | 0.00             | 0.30             |                  | 0.0000       |
| B0365.1                             | 1.13             | 1.27             |                  | 1.08             | 0.4216       |
| B0365.6                             |                  |                  | 0.00             | 1.00             | 0.4098       |
| B0365.7                             | 0.00             | 0.77             | 0.00             | 0.00             | 0.1587       |
| B0393.1                             | 0.64             |                  | 0.98             | 1.02             | 0.2527       |
| B0395.3                             |                  |                  | 2.66             |                  | 0.0109       |
| B0403.4                             |                  | 1.01             | 1.10             | 1.02             | 0.4657       |
| B0432.2                             | 1.19             |                  |                  | 2.44             | 0.1206       |
| B0464.1                             | 0.61             |                  | 0.75             | 0.00             | 0.0811       |
| C01B10.11                           |                  | 0.00             | 0.79             | 1.30             | 0.4329       |
| C01F1.3a                            |                  |                  | 0.89             |                  | 0.2817       |
| C01F1.3a;C01F1.3b                   | 0.97             | 0.00             |                  | 1.30             | 0.4539       |
| C01G5.4                             | 0.65             | 0.00             | 0.00             | 0.00             | 0.0628       |
| C01G5.5                             |                  | 1.33             |                  |                  | 0.2933       |
| C01G6.6a                            |                  |                  | 1.32             |                  | 0.2987       |
| C01G6.6a;C01G6.6b                   | 0.00             | 0.00             |                  | 1.08             | 0.4945       |
| C01G8.5a;C01G8.5b                   | 1.64             | 0.00             | 0.17             |                  | 0.0151       |
| C02B10.1                            | 0.00             |                  | 0.74             | 0.86             | 0.1846       |
| C02D5.4                             | 1.04             | 0.72             | 0.00             |                  | 0.2571       |
| C02F5.9                             | 0.65             |                  | 0.78             | 1.01             | 0.1859       |
| C03G5.1                             | 1.31             | 0.70             |                  | 0.00             | 0.3628       |
| C04F6.1                             | 0.99             | 1.51             | 1.02             |                  | 0.4269       |
| C04F6.4a;C04F6.4b                   | 1.89             |                  |                  | 1.57             | 0.1153       |
| C05C10.3                            | 0.78             | 1.09             | 0.82             |                  | 0.2816       |
| C05C8.3                             |                  |                  | 0.59             | 0.69             | 0.0539       |
| C05C8.4                             | 0.00             | 0.00             | 3.09             | 0.00             | 0.0038       |
| C05D11.11a                          |                  |                  |                  | 0.82             | 0.2062       |
| C05D11.11a;C05D11.11b               | 0.98             | 0.61             | 0.86             |                  | 0.1875       |
| C05E4.9a;C05E4.9b                   |                  | 0.61             | 0.80             | 1.26             | 0.2371       |
| C05G5.4                             |                  | 0.83             | 1.09             | 0.84             | 0.3133       |
| C06A1.1                             | 0.97             | 0.85             | 0.80             | 0.73             | 0.2201       |

|                                              |      |      |      |      |        |
|----------------------------------------------|------|------|------|------|--------|
| C06A6.4a;C06A6.4b                            |      | 0.51 | 0.00 | 0.81 | 0.0603 |
| C06A6.5                                      | 0.00 | 0.69 |      | 0.00 | 0.0868 |
| C06E7.1a;C06E7.1b                            |      |      | 0.45 |      | 0.0041 |
| C06E7.1a;T13A10.11a;C06E7.1c                 |      | 0.29 |      |      | 0.0000 |
| C06E7.3a                                     | 0.00 | 0.00 | 0.00 | 0.56 | 0.0243 |
| C06G3.10                                     | 0.00 |      | 0.00 | 1.11 | 0.4640 |
| C06G3.5a;C06G3.5b                            |      | 1.27 | 1.54 |      | 0.2502 |
| C06G3.5b                                     | 0.00 |      |      | 0.91 | 0.3032 |
| C06G4.2a;C06G4.2b;C06G4.2d                   |      |      |      | 1.11 | 0.4636 |
| C06G4.2a;C06G4.2b;C06G4.2d;C06G4.2c          | 1.05 |      |      |      | 0.4796 |
| C06G4.2a;C06G4.2d;C06G4.2b                   |      |      | 1.70 |      | 0.1238 |
| C06H2.1                                      |      | 1.09 | 1.17 | 2.41 | 0.2202 |
| C07A12.4a;C07A12.4b                          |      |      | 1.36 | 1.09 | 0.3708 |
| C07A12.4a;C07A12.4b;C07A12.4c                | 1.09 |      |      |      | 0.4803 |
| C07A4.2                                      |      | 0.53 |      |      | 0.0150 |
| C07D8.6                                      |      | 0.91 | 0.95 | 0.90 | 0.3195 |
| C07G2.3a;C07G2.3b                            | 0.81 | 0.69 |      | 0.87 | 0.1724 |
| C07H6.5                                      | 0.00 |      | 0.00 | 0.29 | 0.0000 |
| C08A9.1                                      | 0.00 | 0.00 | 1.02 | 0.00 | 0.4352 |
| C08B11.7                                     | 1.50 | 1.28 |      | 0.00 | 0.2604 |
| C08B6.1a;C08B6.1b                            |      |      | 1.44 |      | 0.2294 |
| C08B6.8                                      |      | 0.00 | 1.45 | 1.23 | 0.2894 |
| C08B6.9                                      |      |      | 1.55 | 1.53 | 0.1807 |
| C08H9.2a;C08H9.2b                            | 0.97 | 1.24 | 1.33 |      | 0.4138 |
| C09D1.1b;C09D1.1g;C09D1.1a;C09D1.1c;C09D1.1d | 0.00 |      | 0.74 | 1.50 | 0.4821 |
| C09D4.5                                      | 0.74 | 2.63 | 2.45 | 1.79 | 0.1195 |
| C09E7.7;F27B3.5                              |      | 0.87 | 0.00 |      | 0.2644 |
| C11D2.4                                      |      | 0.75 |      | 0.99 | 0.2477 |
| C11D2.4;F28G4.4                              | 0.17 |      |      |      | 0.0000 |
| C12C8.2a                                     | 0.00 | 0.00 |      | 0.84 | 0.2285 |
| C12D8.11                                     | 0.64 |      | 0.90 | 1.01 | 0.2239 |
| C13B4.2                                      | 0.00 | 0.00 | 0.25 | 0.40 | 0.0001 |
| C14A4.1                                      |      | 1.85 | 1.20 | 1.48 | 0.2051 |
| C14A4.14                                     |      |      |      | 0.62 | 0.0466 |
| C14B1.1                                      |      | 0.81 | 0.86 | 0.88 | 0.2396 |
| C14B9.2                                      | 1.00 |      | 2.03 | 1.95 | 0.1623 |
| C14B9.7                                      | 0.25 | 0.85 |      | 0.40 | 0.0031 |
| C14C10.5                                     |      | 0.00 | 0.73 |      | 0.1160 |
| C14C10.5;F29B9.12                            | 0.91 |      |      | 0.75 | 0.2085 |
| C14F11.1a;C14F11.1b                          | 1.12 | 1.08 | 1.06 |      | 0.4871 |
| C14F11.6                                     | 1.24 |      | 1.50 |      | 0.2728 |
| C15C8.3a;C15C8.3b                            | 0.69 | 0.55 | 0.86 | 0.84 | 0.1159 |
| C15H11.7                                     | 0.71 | 5.08 | 0.71 | 1.50 | 0.2490 |
| C15H9.6                                      | 0.79 | 1.01 | 0.87 |      | 0.2804 |
| C16A3.10a;C16A3.10b                          | 0.85 |      |      | 0.82 | 0.2241 |
| C16A3.10a;C16A3.10b;C16A3.10c                |      | 1.05 | 0.89 |      | 0.3764 |
| C16C10.10                                    |      |      | 0.00 | 0.62 | 0.0473 |
| C17B7.11                                     |      |      | 1.36 |      | 0.2721 |
| C17G1.7                                      |      | 1.14 | 1.20 | 1.19 | 0.4068 |
| C17H12.14                                    | 1.07 |      | 1.04 | 1.02 | 0.4678 |
| C18A11.7a                                    |      | 0.84 | 0.89 | 1.00 | 0.3042 |
| C18A3.6a;C18A3.6b                            | 0.00 | 0.00 | 8.14 |      | 0.0000 |

|                            |      |      |      |      |        |
|----------------------------|------|------|------|------|--------|
| C23G10.3                   | 0.66 | 0.84 | 0.88 | 0.94 | 0.2087 |
| C23G10.4b;C23G10.4a        | 1.54 | 1.17 | 1.63 | 1.10 | 0.2881 |
| C24A3.4                    | 0.00 |      | 1.54 | 0.91 | 0.3985 |
| C25B8.3a;C25B8.3b;C25B8.3c |      |      | 0.81 | 2.00 | 0.3339 |
| C25B8.3a;C25B8.3c          | 0.94 |      |      |      | 0.3413 |
| C25B8.3b;C25B8.3a;C25B8.3c |      | 1.52 |      |      | 0.1881 |
| C25F6.3                    |      | 0.77 | 0.75 | 1.23 | 0.2835 |
| C25F9.2                    | 0.00 | 3.22 | 0.00 | 0.00 | 0.0028 |
| C25F9.5;C25F9.10b          |      |      |      | 0.86 | 0.2528 |
| C26D10.2a                  | 1.35 | 1.10 | 1.19 |      | 0.3822 |
| C27D11.1                   | 0.85 | 1.03 | 0.96 |      | 0.3495 |
| C27D6.1                    | 0.44 | 0.00 | 0.00 |      | 0.0030 |
| C27H6.2                    |      | 0.90 | 0.85 | 0.85 | 0.2566 |
| C27H6.4b;C27H6.4a;C27H6.4c | 1.53 |      |      | 1.18 | 0.2865 |
| C27H6.8                    | 0.00 | 0.99 | 0.00 | 0.00 | 0.3992 |
| C28H8.11a                  | 0.00 |      | 0.00 | 1.06 | 0.4903 |
| C28H8.11a;C28H8.11b        |      | 0.98 |      |      | 0.3961 |
| C28H8.3                    | 1.07 | 1.78 | 1.30 | 2.11 | 0.1941 |
| C29E4.7                    | 0.96 |      | 0.96 | 0.88 | 0.3346 |
| C29E4.8                    | 1.07 | 0.87 |      | 0.92 | 0.3545 |
| C29E6.4                    |      | 0.00 | 1.56 |      | 0.1733 |
| C29F5.1                    | 1.01 |      | 1.03 | 1.09 | 0.4662 |
| C29F7.2                    |      |      |      | 0.80 | 0.1863 |
| C29F7.3                    |      |      | 0.70 | 0.59 | 0.0590 |
| C30C11.2                   | 0.00 |      | 0.47 | 0.64 | 0.0209 |
| C30C11.4                   | 1.01 |      | 0.87 | 0.79 | 0.2748 |
| C30H7.2b;C30H7.2a          | 0.89 | 0.70 |      | 0.99 | 0.2402 |
| C31C9.2                    | 0.96 |      | 0.88 | 0.81 | 0.2730 |
| C32E8.2a                   |      |      |      | 1.09 | 0.4851 |
| C32E8.2a;C32E8.2b          |      |      | 1.55 |      | 0.1776 |
| C32E8.9                    | 0.87 |      | 0.69 |      | 0.1586 |
| C32F10.8a;C32F10.8b        | 1.20 | 1.53 | 2.51 |      | 0.1349 |
| C34B2.7                    | 0.00 | 2.13 |      | 1.43 | 0.1091 |
| C34C12.8                   | 1.54 | 1.04 | 1.18 |      | 0.3597 |
| C34E10.5                   | 2.29 |      | 0.00 |      | 0.0275 |
| C34E10.6                   | 0.89 |      | 0.70 | 0.86 | 0.1946 |
| C34E7.4                    |      |      | 1.49 | 0.00 | 0.2054 |
| C34F11.3b                  |      | 0.89 | 0.78 |      | 0.2190 |
| C34F11.3b;C34F11.3a        | 0.67 |      |      | 1.10 | 0.2432 |
| C34G6.1                    | 1.42 | 0.00 | 0.00 | 0.00 | 0.2376 |
| C34G6.6a;C34G6.6b          |      | 0.00 | 0.00 | 0.93 | 0.3299 |
| C35C5.1                    | 0.00 | 6.68 | 0.00 | 0.00 | 0.0000 |
| C35D10.6                   | 0.00 | 0.00 | 0.00 | 1.82 | 0.0919 |
| C36A4.4                    |      |      | 0.36 | 1.24 | 0.0773 |
| C36A4.5                    |      |      | 0.00 | 1.55 | 0.1760 |
| C36A4.9a;C36A4.9b          | 0.00 |      | 0.86 | 1.21 | 0.4385 |
| C36B1.4                    | 1.42 | 1.25 |      | 1.91 | 0.1975 |
| C36B1.7                    |      | 0.77 |      |      | 0.1573 |
| C36E8.5                    | 1.56 | 1.45 | 1.01 |      | 0.3030 |
| C37C3.6a;C37C3.6c          | 1.09 |      |      |      | 0.4863 |
| C37C3.6b;C37C3.6a;C37C3.6c |      | 1.09 |      | 1.07 | 0.4908 |
| C37E2.1                    |      | 0.86 | 1.08 |      | 0.3764 |

|                                          |      |      |      |      |        |
|------------------------------------------|------|------|------|------|--------|
| C37H5.6a;C37H5.6b                        | 0.81 |      | 0.67 | 1.02 | 0.2072 |
| C37H5.8                                  |      | 0.88 | 0.93 | 0.94 | 0.3160 |
| C38D4.3                                  |      |      |      | 0.74 | 0.1255 |
| C39F7.4                                  | 0.00 | 0.00 | 0.00 | 0.91 | 0.3111 |
| C41A3.1                                  | 0.00 | 0.00 | 1.14 | 0.00 | 0.4382 |
| C41C4.8                                  | 0.83 | 0.00 | 0.86 |      | 0.2323 |
| C41D11.2                                 | 1.17 |      | 3.39 | 1.71 | 0.0757 |
| C42C1.11a;C42C1.11c                      |      | 0.00 |      | 1.02 | 0.4374 |
| C42C1.11a;C42C1.11c;C42C1.11b            | 0.00 |      | 0.89 |      | 0.2883 |
| C42C1.5                                  |      |      | 0.85 |      | 0.2403 |
| C42D8.2a;C42D8.2b                        | 0.69 |      | 0.90 | 0.78 | 0.1694 |
| C44B12.2                                 | 0.00 | 1.19 | 2.31 | 2.32 | 0.0836 |
| C44B7.10                                 | 0.93 |      | 1.00 | 0.62 | 0.2226 |
| C44E4.4                                  | 1.62 | 1.11 | 1.45 | 1.04 | 0.3239 |
| C45B11.3                                 | 0.61 |      | 0.66 | 0.00 | 0.0560 |
| C46F11.2a;C46F11.2b                      |      |      | 0.65 | 0.93 | 0.1649 |
| C46F11.2b;C46F11.2a                      |      | 0.78 |      |      | 0.1639 |
| C47B2.3                                  |      |      |      | 1.06 | 0.4856 |
| C47B2.4                                  | 0.00 | 0.00 | 0.99 | 1.50 | 0.3746 |
| C47B2.6a;C47B2.6b                        | 0.00 | 2.21 | 0.00 | 1.85 | 0.0543 |
| C47D12.6a;C47D12.6b                      | 0.72 | 0.86 | 0.88 | 0.72 | 0.1765 |
| C47E12.1                                 | 0.95 | 0.97 | 0.77 | 0.92 | 0.2959 |
| C47E12.4a;C47E12.4b;C47E12.4c;C47E12.4d  |      | 0.36 | 1.07 | 0.58 | 0.0406 |
| C47E12.5c;C47E12.5a;C47E12.5b            | 1.46 | 1.63 | 1.18 |      | 0.2456 |
| C47E8.5                                  |      | 1.02 | 0.93 | 0.80 | 0.3083 |
| C49F5.1                                  |      |      | 1.02 |      | 0.4414 |
| C49F5.1;C06E7.1b                         | 0.92 | 0.90 |      |      | 0.3059 |
| C49F5.1;C56G3.2                          |      |      |      | 0.93 | 0.3280 |
| C49H3.11                                 | 0.84 |      | 0.98 | 1.01 | 0.3452 |
| C50B6.2                                  | 0.96 | 0.00 |      | 0.46 | 0.0734 |
| C50F2.6a;C50F2.6b                        | 0.97 |      |      | 0.78 | 0.2612 |
| C50F2.6b;C50F2.6a                        |      |      | 0.75 |      | 0.1378 |
| C50F7.10                                 |      | 0.00 | 1.10 | 1.05 | 0.4968 |
| C50F7.4                                  | 0.70 | 0.65 | 0.00 | 0.87 | 0.1222 |
| C51E3.9                                  |      |      | 0.59 | 0.53 | 0.0234 |
| C52A11.4a;C52A11.4d;C52A11.4f;C52A11.4c; | 1.71 | 1.75 |      | 7.66 | 0.0069 |
| C52E4.1                                  | 1.89 |      | 1.67 | 1.08 | 0.1958 |
| C52E4.4                                  |      |      | 1.41 | 0.83 | 0.4953 |
| C53D5.6                                  | 1.18 |      | 1.10 | 1.61 | 0.3296 |
| C54D1.5                                  |      | 1.21 | 1.16 | 0.00 | 0.4028 |
| C54E4.2a;C54E4.2b                        |      |      |      | 0.77 | 0.1515 |
| C55B7.4a                                 |      |      |      | 0.77 | 0.1543 |
| C55B7.4a;C55B7.4b                        |      |      | 1.79 |      | 0.0985 |
| C55F2.1b                                 | 0.00 |      | 1.38 | 0.84 | 0.4924 |
| C55H1.2                                  | 0.00 |      |      | 1.28 | 0.3254 |
| C56A3.5                                  |      |      | 0.68 | 0.99 | 0.2064 |
| C56C10.8                                 | 0.00 | 0.67 | 0.85 | 0.15 | 0.0033 |
| CD4.6                                    | 0.00 |      | 1.29 | 1.42 | 0.2777 |
| D1005.1                                  | 0.00 | 1.20 | 0.98 | 0.00 | 0.4881 |
| D1007.12                                 | 0.69 |      |      | 0.00 | 0.0880 |
| D1025.3                                  |      |      | 0.00 | 0.15 | 0.0000 |
| D1053.1                                  | 0.00 | 0.25 | 0.00 | 0.73 | 0.0026 |

|                     |      |      |      |      |        |
|---------------------|------|------|------|------|--------|
| D1054.2             |      | 0.92 | 0.55 | 0.97 | 0.1691 |
| D2013.9             | 0.00 | 1.03 | 0.00 | 0.00 | 0.4456 |
| D2023.2             | 2.52 | 1.22 | 1.50 |      | 0.1344 |
| D2023.5             | 0.00 | 0.00 | 1.33 | 0.92 | 0.4710 |
| D2045.6             | 0.00 | 1.36 | 1.94 | 0.94 | 0.2804 |
| D2085.1             | 0.00 | 0.00 | 0.84 | 2.62 | 0.2086 |
| D2096.8             | 2.01 | 1.69 |      | 1.23 | 0.1515 |
| E01A2.2a            | 1.39 |      | 0.00 | 1.07 | 0.3729 |
| E01G4.6             | 1.35 |      | 1.14 | 3.53 | 0.1057 |
| E03G2.3             |      |      | 1.63 | 0.94 | 0.3616 |
| E04A4.8             | 1.27 | 0.28 | 0.49 | 0.20 | 0.0026 |
| E04F6.3             | 1.01 |      | 0.00 | 0.00 | 0.4215 |
| E04F6.5a            | 0.00 | 0.00 | 1.65 |      | 0.1367 |
| E04F6.5a;E04F6.5b   |      |      |      | 0.63 | 0.0496 |
| F01F1.12a           | 1.06 |      | 0.85 |      | 0.3500 |
| F01F1.12a;F01F1.12b |      | 0.84 |      | 0.80 | 0.2049 |
| F01F1.15            | 1.50 | 1.26 | 2.42 | 2.25 | 0.0976 |
| F01F1.6             |      | 0.90 | 0.96 | 0.88 | 0.3090 |
| F01F1.8a;F01F1.8b   |      | 1.53 | 1.61 | 1.34 | 0.2035 |
| F01F1.9             | 1.27 |      | 1.04 | 1.53 | 0.3383 |
| F01G10.1            | 1.20 |      | 1.20 | 1.02 | 0.4436 |
| F01G12.5b;F01G12.5a | 0.00 |      |      | 1.54 | 0.1792 |
| F01G4.2             | 0.61 |      | 0.80 | 0.94 | 0.1580 |
| F01G4.6b            | 0.51 |      |      | 0.00 | 0.0117 |
| F02A9.4a            | 1.47 |      | 1.18 | 0.00 | 0.3022 |
| F02E8.1             |      | 2.23 | 1.16 | 1.71 | 0.1409 |
| F02E9.9b;F02E9.9a   | 1.19 | 1.37 | 1.20 | 1.41 | 0.3206 |
| F07A11.2a;F07A11.2b | 1.00 |      | 1.15 | 1.21 | 0.4584 |
| F07A11.5            |      | 1.45 | 1.82 | 1.41 | 0.1773 |
| F07A5.7a;F07A5.7b   | 1.35 | 1.79 | 1.92 |      | 0.1313 |
| F07D10.1            | 0.00 | 0.00 | 0.00 | 0.93 | 0.3258 |
| F08A8.2             | 0.00 | 0.00 | 0.16 |      | 0.0000 |
| F08A8.3             | 2.20 | 0.00 | 0.00 | 0.00 | 0.0348 |
| F08D12.1            | 0.00 |      | 2.67 | 1.16 | 0.1060 |
| F08F8.6             | 0.95 | 0.00 | 0.00 | 0.00 | 0.3596 |
| F09B12.3            | 2.50 | 1.04 | 1.71 | 1.26 | 0.1804 |
| F09E10.3            | 1.97 | 2.00 | 1.18 | 1.61 | 0.1380 |
| F09E5.15a           |      |      |      | 1.34 | 0.2870 |
| F09E5.15b;F09E5.15a | 1.33 | 1.44 |      |      | 0.2613 |
| F09E5.3             | 1.10 |      | 1.24 |      | 0.4156 |
| F09E5.3;Y52B11A.1   |      | 0.82 |      |      | 0.2072 |
| F09F7.4a            |      |      | 0.90 |      | 0.2910 |
| F09F7.4a;F09F7.4b   | 1.07 | 1.04 |      |      | 0.4785 |
| F09G2.9             | 0.00 | 0.00 | 0.00 | 1.26 | 0.3424 |
| F10B5.1             | 0.00 | 0.00 | 8.70 | 2.79 | 0.0001 |
| F10C1.2a;F10C1.2b   | 0.00 | 0.00 |      | 1.16 | 0.4244 |
| F10D11.1            | 1.54 | 1.63 |      | 1.48 | 0.1764 |
| F10G7.2             | 0.77 | 0.00 | 0.91 | 0.89 | 0.2438 |
| F10G7.8             | 1.09 |      | 0.81 | 0.82 | 0.2904 |
| F11C3.3             | 1.39 | 1.38 |      | 1.36 | 0.2662 |
| F11G11.2            |      | 0.65 | 0.75 | 0.72 | 0.0989 |
| F11G11.3            | 0.00 |      | 0.58 | 1.01 | 0.1506 |

|                                     |      |      |      |      |        |
|-------------------------------------|------|------|------|------|--------|
| F11H8.4a;F11H8.4b                   |      | 0.00 | 0.00 | 0.53 | 0.0152 |
| F11H8.4a;F11H8.4b;C46C11.3          | 0.42 |      |      |      | 0.0023 |
| F13B10.2a;F13B10.2c;F13B10.2d       |      | 0.67 |      |      | 0.0746 |
| F13B10.2a;F13B10.2d;F13B10.2c       | 0.00 |      | 1.86 | 0.98 | 0.2799 |
| F13D12.2                            | 0.84 |      | 0.95 | 0.98 | 0.3228 |
| F13D12.4a;F13D12.4b                 |      | 1.02 | 1.23 | 1.04 | 0.4836 |
| F13D12.6                            |      | 0.83 |      | 1.57 | 0.4343 |
| F13E6.3                             | 0.00 |      | 1.70 | 0.73 | 0.4596 |
| F13G3.5a                            | 0.00 |      | 0.77 | 0.76 | 0.1539 |
| F13G3.5a;F13G3.5b                   |      | 0.63 |      |      | 0.0528 |
| F13G3.5b                            | 1.00 |      | 0.00 | 0.00 | 0.4193 |
| F15G9.4d;F15G9.4a;F15G9.4b;F15G9.4c | 0.00 |      | 1.19 | 1.15 | 0.4128 |
| F17A9.4                             |      | 0.00 | 1.32 | 1.23 | 0.3327 |
| F17C11.9a;F17C11.9b;F17C11.9c       |      |      | 1.06 | 0.91 | 0.3977 |
| F17C11.9a;F17C11.9c;F17C11.9b       | 0.85 | 0.82 |      |      | 0.2230 |
| F17C8.9                             |      | 0.00 | 0.83 | 0.92 | 0.2648 |
| F18C12.1                            | 0.00 | 0.00 | 0.00 | 1.97 | 0.0624 |
| F18E2.2                             | 0.00 | 0.00 | 0.00 | 0.77 | 0.1551 |
| F20B6.2                             |      | 0.95 | 0.88 | 1.03 | 0.3540 |
| F20G2.2                             |      |      | 0.59 | 1.31 | 0.2679 |
| F20G4.3                             | 1.06 |      | 1.07 | 1.25 | 0.4550 |
| F20H11.3                            | 0.83 | 0.78 | 0.86 | 0.75 | 0.1895 |
| F21D5.1                             |      | 0.87 | 1.19 |      | 0.4366 |
| F21F8.3                             | 1.10 | 1.09 |      | 1.06 | 0.4898 |
| F21F8.7                             | 0.67 | 0.95 | 0.82 |      | 0.1893 |
| F21H12.6                            | 0.00 | 0.00 | 0.81 | 0.77 | 0.1777 |
| F22B5.9                             |      | 1.22 | 0.99 | 1.31 | 0.4204 |
| F22D6.3a                            | 0.76 | 0.67 |      | 1.05 | 0.1980 |
| F22G12.4                            |      | 0.00 | 1.88 | 0.00 | 0.0783 |
| F23B12.5                            | 0.77 | 0.45 |      | 0.99 | 0.0952 |
| F23C8.5                             | 1.31 | 1.47 | 0.95 |      | 0.3694 |
| F23F1.8b                            | 0.00 |      | 0.00 | 0.98 | 0.3894 |
| F23F1.8b;F23F1.8a                   |      | 0.90 |      |      | 0.2980 |
| F23H11.3                            |      |      |      | 1.34 | 0.2847 |
| F25B4.1                             | 0.00 |      | 3.99 | 1.78 | 0.0108 |
| F25D1.1a;F25D1.1b                   | 1.66 | 1.89 | 0.00 | 1.89 | 0.0932 |
| F25D7.4a;F25D7.4b                   |      |      |      | 0.74 | 0.1306 |
| F25D7.4b                            |      |      | 0.98 |      | 0.3924 |
| F25G6.9                             | 0.00 | 0.00 | 1.05 | 1.07 | 0.4893 |
| F25H2.10                            |      |      | 1.36 | 3.26 | 0.0444 |
| F25H2.11                            |      | 0.87 | 0.72 | 0.92 | 0.2209 |
| F25H2.9                             | 1.04 |      | 1.01 | 1.10 | 0.4733 |
| F25H5.3b;F25H5.3a;F25H5.3c;F25H5.3d |      | 0.97 |      |      | 0.3812 |
| F25H5.3b;F25H5.3c                   |      |      | 0.94 | 0.98 | 0.3678 |
| F25H5.3e;F25H5.3c                   | 1.56 |      |      |      | 0.1720 |
| F25H5.4                             | 1.06 |      | 1.13 | 0.97 | 0.4764 |
| F26D10.3                            |      | 0.90 |      | 0.91 | 0.3003 |
| F26D10.3;F11D5.6                    |      |      | 1.04 |      | 0.4675 |
| F26E4.8;C47B2.3;Y19D2B.1            | 1.56 | 1.12 | 1.11 |      | 0.3519 |
| F26E4.8;Y19D2B.1                    |      |      |      | 0.99 | 0.4092 |
| F26F4.10a;F26F4.10b;F26F4.10c       |      |      |      | 0.97 | 0.3734 |
| F26F4.10a;F26F4.10c                 | 1.08 |      | 0.70 |      | 0.2600 |

|                                     |      |      |      |      |        |
|-------------------------------------|------|------|------|------|--------|
| F26H11.4                            | 0.00 | 0.00 | 0.00 | 0.58 | 0.0295 |
| F26H9.5                             |      | 1.34 | 1.42 | 1.04 | 0.3472 |
| F26H9.6                             | 1.04 |      |      | 1.63 | 0.3139 |
| F27C1.6                             | 0.30 | 0.00 | 0.00 | 0.00 | 0.0001 |
| F27C1.7b                            |      |      | 0.90 |      | 0.2937 |
| F27C1.7b;F27C1.7a                   |      | 0.00 |      | 2.16 | 0.0383 |
| F27D4.1                             | 0.96 |      | 0.73 | 0.85 | 0.2323 |
| F27D4.5                             |      |      | 0.74 | 0.00 | 0.1253 |
| F27D9.5                             |      | 0.91 | 0.80 | 1.02 | 0.3018 |
| F28A10.6                            |      |      | 1.68 |      | 0.1287 |
| F28A12.4                            |      |      | 0.00 | 0.91 | 0.3037 |
| F28H1.3                             | 1.32 | 0.00 |      | 2.09 | 0.1350 |
| F28H7.3                             | 0.54 |      | 0.68 | 0.96 | 0.1013 |
| F29C12.4                            | 1.31 | 1.34 | 1.04 | 1.11 | 0.3943 |
| F29F11.1                            |      | 0.48 |      | 0.82 | 0.0499 |
| F29G9.5                             |      |      | 0.71 |      | 0.1046 |
| F31C3.1                             | 0.00 | 0.00 | 3.81 | 0.00 | 0.0007 |
| F31D4.3                             | 0.47 | 0.49 | 0.26 | 0.86 | 0.0064 |
| F32B5.1;W10C8.5                     | 0.91 |      |      |      | 0.3050 |
| F32B5.8                             | 0.75 | 0.77 | 0.90 | 0.90 | 0.2138 |
| F32B6.2                             | 0.00 | 1.51 | 1.10 | 1.11 | 0.3674 |
| F32D1.5                             | 1.28 | 1.22 | 2.16 | 1.23 | 0.2367 |
| F32H2.5                             |      | 1.01 | 1.05 | 1.01 | 0.4425 |
| F33A8.3                             | 1.55 |      |      | 1.53 | 0.1815 |
| F33H2.3                             | 1.28 | 0.00 | 0.00 | 0.00 | 0.3257 |
| F35A5.1                             | 0.00 | 0.00 | 3.68 | 0.00 | 0.0009 |
| F35C5.6                             | 0.57 | 0.96 |      | 0.96 | 0.1932 |
| F35D11.4                            | 1.92 |      | 1.79 | 1.41 | 0.1247 |
| F35E8.8                             |      |      | 0.67 |      | 0.0767 |
| F35G12.10                           | 0.00 |      |      | 1.96 | 0.0642 |
| F35G12.12                           | 0.00 | 0.00 | 0.00 | 0.63 | 0.0539 |
| F35G12.2                            |      | 0.00 | 2.32 | 0.98 | 0.1940 |
| F35G2.2                             | 1.64 | 0.00 | 1.21 | 1.32 | 0.2621 |
| F35G2.4                             |      | 0.00 | 0.71 | 1.73 | 0.4684 |
| F36D4.3a;F36D4.3b;F36D4.3e;F36D4.3f | 0.00 | 1.54 | 0.00 | 0.00 | 0.1803 |
| F36H1.6                             | 1.46 | 0.00 | 1.32 | 1.23 | 0.2916 |
| F37B1.1                             |      | 0.00 | 1.10 | 0.63 | 0.2223 |
| F37B12.2                            |      | 0.00 | 0.60 | 0.93 | 0.1368 |
| F37C4.5a                            |      |      | 0.96 | 0.98 | 0.3797 |
| F37C4.5a;F37C4.5b                   | 0.85 |      |      |      | 0.2360 |
| F37E3.1                             |      |      | 2.38 | 1.23 | 0.1193 |
| F37H8.5                             | 1.13 | 1.01 | 1.14 |      | 0.4825 |
| F38A1.8                             |      | 0.00 | 2.14 |      | 0.0407 |
| F38B2.4a                            |      | 0.78 | 0.75 | 1.03 | 0.2287 |
| F38E11.3                            |      | 0.00 |      | 1.00 | 0.4126 |
| F38H4.8b;F38H4.8a                   | 0.00 |      |      | 0.87 | 0.2640 |
| F39C12.1                            |      | 0.00 | 0.28 | 3.94 | 0.4789 |
| F39C12.1;ZC53.2                     | 1.72 |      |      |      | 0.1162 |
| F39H11.5                            | 0.80 | 1.02 | 0.00 | 0.00 | 0.2974 |
| F40A3.3a;F40A3.3b                   |      |      | 0.78 |      | 0.1692 |
| F40A3.3b;F40A3.3a                   |      | 0.98 |      | 0.19 | 0.0028 |
| F40F4.6                             |      |      | 0.75 | 1.11 | 0.3096 |

|                                                             |      |      |      |      |        |
|-------------------------------------------------------------|------|------|------|------|--------|
| F40F8.10                                                    | 1.04 | 1.21 | 1.41 | 1.22 | 0.3771 |
| F40F9.6a;F40F9.6b                                           | 2.22 | 2.13 |      | 2.57 | 0.0270 |
| F40G9.3                                                     | 1.36 |      | 0.00 | 0.00 | 0.2725 |
| F41C3.3                                                     | 0.00 |      | 0.00 | 1.56 | 0.1713 |
| F41C3.5                                                     | 1.57 | 1.14 | 1.14 | 1.54 | 0.2929 |
| F42A10.1                                                    | 0.00 | 0.00 | 0.00 | 0.75 | 0.1368 |
| F42C5.8                                                     |      | 1.10 | 1.61 | 2.94 | 0.1127 |
| F42G9.1a                                                    | 0.00 |      | 1.82 | 0.00 | 0.0917 |
| F43E2.5                                                     | 1.18 |      | 1.92 | 0.99 | 0.3089 |
| F43E2.8                                                     | 0.69 | 0.97 |      | 0.94 | 0.2460 |
| F43G9.1                                                     | 0.75 | 0.69 | 0.92 | 0.92 | 0.2014 |
| F43G9.5                                                     |      |      | 1.78 | 0.98 | 0.3005 |
| F44C4.3                                                     | 1.98 | 1.73 | 1.46 | 1.56 | 0.1310 |
| F44E7.4a;F44E7.4b;F44E7.4c;F44E7.4d                         | 1.55 |      |      | 1.72 | 0.1436 |
| F44E7.4a;F44E7.4b;F44E7.4d                                  |      | 1.22 |      |      | 0.3749 |
| F44F4.11                                                    | 1.33 | 0.00 | 3.00 | 0.00 | 0.0579 |
| F44G3.2                                                     | 0.98 | 0.99 |      |      | 0.3989 |
| F45D11.14;F45D11.15;F45D11.16                               | 1.96 | 1.55 |      | 1.38 | 0.1526 |
| F45E10.1a;F45E10.1c;F45E10.1g;F45E10.1h;F45E10.1b;F45E10.1d |      | 0.97 |      |      | 0.3753 |
| F45E4.2                                                     | 1.47 |      | 1.52 | 1.75 | 0.1644 |
| F45H10.1                                                    | 0.00 | 0.00 | 0.00 | 0.90 | 0.3007 |
| F46A9.5                                                     |      |      |      | 0.18 | 0.0000 |
| F46E10.10a                                                  |      | 1.17 | 0.77 |      | 0.3571 |
| F46E10.10a;F46E10.10b                                       | 0.98 |      |      | 0.93 | 0.3599 |
| F46F11.2                                                    | 1.31 | 1.33 | 1.47 | 1.31 | 0.2803 |
| F46H5.3b                                                    | 0.90 | 0.87 |      | 0.95 | 0.3019 |
| F47B10.1                                                    | 0.00 | 0.00 | 0.00 | 1.85 | 0.0838 |
| F47G6.4                                                     | 0.75 |      | 0.00 | 0.00 | 0.1346 |
| F48E3.3                                                     | 1.82 | 1.45 | 1.53 | 1.11 | 0.2201 |
| F48E8.3                                                     | 0.95 | 0.88 | 0.79 | 0.85 | 0.2561 |
| F48E8.5                                                     | 0.40 | 0.00 | 0.46 | 0.65 | 0.0086 |
| F48E8.6                                                     | 0.72 | 0.00 | 1.28 | 0.22 | 0.0332 |
| F49C12.8                                                    | 0.00 | 0.81 |      | 0.80 | 0.1936 |
| F49E8.3a                                                    | 0.92 | 0.00 |      | 1.00 | 0.3647 |
| F52B10.1                                                    |      | 0.78 | 0.81 | 1.17 | 0.3053 |
| F52B11.2b;F52B11.2a                                         |      | 0.30 |      | 0.87 | 0.0108 |
| F52D1.1                                                     | 0.64 | 0.51 | 1.16 |      | 0.1139 |
| F52D10.3a;F52D10.3b                                         | 1.18 | 1.64 | 1.09 | 1.11 | 0.3593 |
| F52E4.1a;F52E4.1b                                           |      | 1.16 |      | 0.53 | 0.1658 |
| F52E4.1b;F52E4.1a                                           | 1.87 |      | 1.04 |      | 0.2528 |
| F52H3.7a                                                    |      |      | 0.89 | 1.31 | 0.4919 |
| F52H3.7a;F52H3.7b                                           | 1.05 | 0.00 |      |      | 0.4731 |
| F53A2.4                                                     | 1.15 | 1.32 | 0.00 | 0.00 | 0.3635 |
| F53A2.6a                                                    |      | 0.88 | 0.00 |      | 0.2753 |
| F53A2.7                                                     | 1.17 | 1.28 | 1.05 |      | 0.4184 |
| F53C11.3                                                    | 0.29 |      |      | 0.00 | 0.0000 |
| F53F1.2                                                     | 1.01 |      | 1.01 | 0.00 | 0.4286 |
| F53F1.3                                                     | 0.79 | 0.80 | 0.73 | 0.96 | 0.2016 |
| F53F10.4                                                    | 0.00 | 1.13 | 0.00 | 1.14 | 0.4425 |
| F53G12.1                                                    | 0.00 | 0.00 | 0.82 | 0.82 | 0.2069 |
| F53G12.10                                                   | 0.68 | 0.81 | 0.97 | 0.93 | 0.2252 |
| F54A3.3                                                     | 1.32 | 1.13 | 1.68 |      | 0.2770 |

|                                         |      |      |       |      |        |
|-----------------------------------------|------|------|-------|------|--------|
| F54C1.7                                 |      | 0.72 | 0.65  | 0.00 | 0.0832 |
| F54C9.5                                 | 1.29 | 1.58 | 1.52  | 1.34 | 0.2362 |
| F54D11.1                                |      | 0.78 |       | 0.77 | 0.1585 |
| F54D5.12                                | 0.00 |      | 1.16  | 1.07 | 0.4631 |
| F54D5.7                                 | 2.40 | 1.33 |       |      | 0.0980 |
| F54D8.3a;F54D8.3b                       | 0.92 |      | 0.83  | 0.81 | 0.2411 |
| F54E4.1                                 |      | 0.54 | 0.00  | 0.00 | 0.0189 |
| F54F3.4                                 | 0.67 | 0.00 |       | 0.97 | 0.1898 |
| F54H12.1a;F54H12.1b                     | 0.97 |      |       | 1.10 | 0.4558 |
| F54H12.6                                | 0.98 | 0.87 | 0.63  |      | 0.1968 |
| F55B11.1                                | 1.00 | 0.64 | 0.60  |      | 0.1166 |
| F55B11.2                                | 0.00 |      |       | 0.64 | 0.0590 |
| F55C5.5                                 | 1.68 |      | 1.00  | 1.45 | 0.2846 |
| F55C5.8                                 | 0.63 | 0.00 |       | 0.93 | 0.1550 |
| F55D10.1                                |      | 1.08 |       | 1.73 | 0.2676 |
| F55F10.1                                | 0.00 |      | 0.00  | 1.29 | 0.3181 |
| F55H2.2                                 | 0.56 | 0.55 |       | 1.13 | 0.0991 |
| F55H2.6                                 | 1.31 | 1.01 | 1.12  | 1.28 | 0.4091 |
| F56B3.5                                 | 0.94 | 1.00 | 0.73  |      | 0.2765 |
| F56D12.1a;F56D12.1b;F56D12.1d           |      | 1.35 |       | 1.01 | 0.4148 |
| F56D12.1b;F56D12.1a;F56D12.1d;F56D12.1c |      |      | 0.88  |      | 0.2774 |
| F56D12.1b;F56D12.1c                     | 1.18 |      |       |      | 0.4073 |
| F56D12.5a                               | 0.77 |      |       | 0.71 | 0.1275 |
| F56D12.5a;F56D12.5b                     |      | 0.81 |       |      | 0.1912 |
| F56D2.1                                 | 0.00 | 1.32 | 1.02  | 1.02 | 0.4615 |
| F56D5.2                                 | 0.00 | 0.00 | 0.00  | 1.49 | 0.2026 |
| F56D5.9                                 |      |      | 0.48  | 0.00 | 0.0075 |
| F56F3.5                                 |      | 1.21 | 1.17  | 1.28 | 0.3739 |
| F56H1.4                                 |      | 1.43 | 1.63  | 0.93 | 0.3175 |
| F57B10.11                               | 0.89 | 0.00 | 0.00  | 0.00 | 0.2855 |
| F57B10.3b;F57B10.3a                     |      | 1.11 | 1.07  | 1.13 | 0.4727 |
| F57B9.10a;F57B9.10b                     | 0.44 | 0.00 | 0.00  | 0.61 | 0.0132 |
| F57B9.6a;F57B9.6b                       |      | 1.50 | 1.14  | 1.06 | 0.3747 |
| F57F5.1                                 |      |      |       | 1.59 | 0.1589 |
| F58B3.5a                                | 0.56 |      |       |      | 0.0246 |
| F58B3.5a;F58B3.5b                       |      | 0.65 | 0.00  |      | 0.0610 |
| F58B4.5                                 | 0.00 |      | 18.56 | 0.88 | 0.0004 |
| F58D5.1a;F58D5.1b                       | 1.14 | 0.00 | 0.00  | 0.00 | 0.4418 |
| F58G1.1                                 | 0.00 | 0.00 | 0.00  | 2.62 | 0.0120 |
| F58G1.4                                 | 1.34 | 1.27 | 1.30  | 1.13 | 0.3445 |
| F58H1.3a                                | 1.48 |      | 1.43  | 0.96 | 0.3373 |
| F59A2.3                                 | 0.59 | 0.56 | 0.73  | 0.63 | 0.0494 |
| F59B8.2                                 | 1.07 | 0.83 | 0.84  |      | 0.3050 |
| F59D8.1                                 | 0.73 | 0.00 | 0.86  | 0.73 | 0.1554 |
| F59D8.2                                 | 0.44 | 0.42 |       | 0.57 | 0.0059 |
| H06H21.8b;H06H21.8a                     | 0.00 | 0.00 | 0.00  | 2.13 | 0.0414 |
| H06H21.9                                | 1.06 |      |       | 0.00 | 0.4912 |
| H06O01.1                                | 0.77 | 0.65 | 0.71  | 0.76 | 0.1119 |
| H06O01.3                                | 0.00 | 0.00 | 4.61  | 2.02 | 0.0041 |
| H13N06.3a;H13N06.3b                     | 0.00 | 0.94 | 0.00  | 0.00 | 0.3385 |
| H14A12.2a                               |      |      | 0.89  |      | 0.2787 |
| H14A12.2a;H14A12.2b                     | 0.87 |      |       | 0.76 | 0.2019 |

|                                              |      |      |      |      |        |
|----------------------------------------------|------|------|------|------|--------|
| H14E04.2a;H14E04.2b;H14E04.2c;H14E04.2d      |      |      |      | 1.57 | 0.1680 |
| H15N14.2a;H15N14.2b                          | 1.18 |      | 0.00 | 0.00 | 0.4047 |
| H19M22.2b;H19M22.2a;H19M22.2d;H19M22.2c      |      |      | 0.47 | 0.00 | 0.0055 |
| H19N07.1                                     | 1.71 | 0.00 | 1.34 | 1.86 | 0.1494 |
| H19N07.2a;H19N07.2b;H19N07.2c                | 0.00 | 0.00 | 1.38 |      | 0.2646 |
| H19N07.2c;H19N07.2a;H19N07.2b                |      |      |      | 2.17 | 0.0372 |
| H22K11.1                                     | 1.00 | 0.00 | 0.00 | 1.97 | 0.2486 |
| H27M09.2                                     | 0.00 |      | 0.65 |      | 0.0617 |
| H28G03.6                                     |      | 1.41 | 0.00 | 0.00 | 0.2446 |
| H28O16.1a;H28O16.1c;H28O16.1b                |      | 1.88 | 0.00 |      | 0.0780 |
| H28O16.1d                                    |      | 0.00 | 1.62 | 1.28 | 0.2302 |
| H28O16.1d;H28O16.1a                          | 0.84 |      |      |      | 0.2229 |
| H34C03.2                                     | 0.00 |      | 1.66 | 1.01 | 0.3180 |
| JC8.3a                                       | 0.16 | 0.23 | 0.24 | 0.11 | 0.0000 |
| K01C8.10                                     | 1.28 | 1.35 | 1.40 |      | 0.2870 |
| K01G5.4                                      | 1.21 | 2.09 | 1.01 |      | 0.2688 |
| K01G5.7                                      | 3.70 | 2.94 | 1.57 | 0.67 | 0.0869 |
| K02A4.1                                      | 0.00 |      |      | 0.37 | 0.0006 |
| K02D10.1a;K02D10.1b;K02D10.1c                |      | 0.91 | 1.05 | 0.80 | 0.3108 |
| K02D7.4                                      | 1.12 |      | 1.08 | 1.04 | 0.4956 |
| K02F2.1a;K02F2.1b                            | 1.62 |      |      | 0.00 | 0.1478 |
| K02F2.2                                      | 0.89 | 0.92 | 0.83 | 0.94 | 0.2893 |
| K02F3.3                                      | 0.00 | 1.05 | 0.00 | 0.00 | 0.4763 |
| K02F6.4                                      | 0.00 | 0.00 | 0.00 | 1.11 | 0.4665 |
| K03A1.5                                      |      | 0.00 | 1.89 | 1.15 | 0.2109 |
| K04B12.1                                     |      |      | 0.00 | 1.90 | 0.0747 |
| K04D7.1                                      | 0.00 |      | 0.89 | 0.89 | 0.2811 |
| K04D7.3                                      | 1.39 | 1.84 |      | 0.74 | 0.3584 |
| K04G2.1                                      |      |      | 1.19 |      | 0.4003 |
| K04G7.4a;K04G7.4b                            | 1.08 |      | 0.00 | 1.14 | 0.4641 |
| K05C4.1                                      | 1.86 | 1.04 | 0.00 | 1.27 | 0.2786 |
| K06A4.5                                      |      |      | 0.55 | 0.57 | 0.0242 |
| K06A5.6                                      | 0.63 |      | 1.16 | 1.11 | 0.3368 |
| K06G5.1a;K06G5.1b                            |      | 1.59 | 0.00 |      | 0.1592 |
| K07A1.12                                     |      |      | 1.08 |      | 0.4948 |
| K07A1.2                                      |      | 1.00 | 1.73 |      | 0.3034 |
| K07A12.7                                     | 0.00 |      | 0.64 | 0.93 | 0.1595 |
| K07A3.1                                      | 0.93 | 0.94 | 0.98 |      | 0.3550 |
| K07C5.1                                      |      | 1.19 | 0.00 |      | 0.4001 |
| K07D4.3                                      | 2.84 | 4.48 | 0.00 | 3.64 | 0.0011 |
| K07E12.1a                                    |      | 4.87 | 0.90 | 7.15 | 0.0032 |
| K07E12.1a;K07E12.1b                          | 2.91 |      |      |      | 0.0058 |
| K07E3.3                                      | 1.90 | 1.04 | 1.25 |      | 0.2788 |
| K07E3.4a;K07E3.4b                            | 0.00 | 0.00 | 2.27 | 0.90 | 0.2331 |
| K07E8.3                                      |      |      | 0.95 |      | 0.3603 |
| K07H8.6a;K07H8.6c;K07H8.6b                   | 1.02 | 1.14 | 1.11 |      | 0.4865 |
| K08E3.5a;K08E3.5b;K08E3.5c;K08E3.5e;K08E3.5f |      | 1.64 |      |      | 0.1429 |
| K08E3.5c;K08E3.5b;K08E3.5a                   |      |      |      | 1.18 | 0.4075 |
| K08E3.5c;K08E3.5b;K08E3.5a;K08E3.5e;K08E3.5f |      |      | 1.66 |      | 0.1352 |
| K08F11.3                                     |      | 1.05 | 2.15 | 1.20 | 0.2560 |
| K08F4.7                                      | 0.00 | 0.00 | 3.98 | 0.00 | 0.0005 |
| K08F4.9                                      | 0.52 |      | 0.52 | 0.62 | 0.0216 |

|                                                                         |      |      |      |      |        |
|-------------------------------------------------------------------------|------|------|------|------|--------|
| K08F8.4                                                                 | 0.41 | 0.71 | 0.92 | 0.83 | 0.0862 |
| K08H10.1                                                                | 1.18 | 1.04 |      | 1.05 | 0.4864 |
| K08H10.2b                                                               |      |      | 0.76 | 1.21 | 0.3671 |
| K08H10.2b;K08H10.2a                                                     | 1.19 | 0.58 |      |      | 0.2147 |
| K09E2.3                                                                 | 1.34 | 1.32 |      | 0.93 | 0.4047 |
| K09F5.2                                                                 |      | 0.00 | 1.01 | 1.22 | 0.4634 |
| K10B3.10                                                                | 2.46 | 2.26 |      |      | 0.0233 |
| K10B3.7;K10B3.8                                                         | 1.24 | 0.97 | 1.11 |      | 0.4760 |
| K10C2.4                                                                 | 0.76 | 1.60 | 4.02 | 0.70 | 0.2764 |
| K10C9.3                                                                 | 0.73 |      | 0.50 | 0.00 | 0.0409 |
| K10H10.2                                                                | 0.00 | 0.97 |      | 0.46 | 0.0755 |
| K11B4.1                                                                 |      |      |      | 0.92 | 0.3145 |
| K11C4.3b;K11C4.3a;K11C4.3c                                              | 0.00 |      |      | 0.96 | 0.3622 |
| K11E8.1c;K11E8.1h;K11E8.1e;K11E8.1f;K11E8.1k;K11E8.1l;K11E8.1b          |      |      |      | 1.08 | 0.4898 |
| K11G12.1a                                                               | 0.62 | 0.00 | 0.00 |      | 0.0489 |
| K11H12.2                                                                |      |      | 0.00 | 2.12 | 0.0425 |
| K11H3.1a;K11H3.1b;K11H3.1d                                              | 0.67 |      |      | 1.47 | 0.4054 |
| K11H3.1b;K11H3.1d                                                       |      | 1.03 |      |      | 0.4515 |
| K11H3.1b;K11H3.1d;K11H3.1a                                              |      |      | 1.28 |      | 0.3309 |
| K12C11.1                                                                | 0.82 | 0.80 | 0.82 | 0.97 | 0.2420 |
| K12F2.1                                                                 | 0.00 | 0.00 | 1.04 | 0.00 | 0.4602 |
| K12G11.3                                                                | 0.00 | 1.70 | 1.69 |      | 0.1244 |
| K12H4.7a;K12H4.7b                                                       | 0.56 | 0.00 | 0.48 |      | 0.0129 |
| LLC1.3a;LLC1.3b                                                         | 0.81 |      | 0.99 | 0.93 | 0.3029 |
| M01E11.5                                                                |      |      | 1.47 | 2.16 | 0.1007 |
| M01F1.2                                                                 | 1.46 | 1.25 | 2.47 | 1.79 | 0.1271 |
| M02D8.1                                                                 | 0.00 | 0.88 | 1.42 | 0.00 | 0.4558 |
| M03A8.1                                                                 |      | 0.84 | 0.78 | 1.04 | 0.2727 |
| M03F4.2a;M03F4.2b;M03F4.2c;T04C12.4;T04C12.5;T04C12.6;M03F4.2b;M03F4.2c | 1.03 |      |      | 1.06 | 0.4520 |
| M03F4.2a;T04C12.4;T04C12.5;T04C12.6;M03F4.2b;M03F4.2c                   |      |      |      |      | 0.4872 |
| M03F4.2b;M03F4.2c                                                       |      | 1.27 |      |      | 0.3354 |
| M03F4.2c;M03F4.2b                                                       |      |      | 1.12 |      | 0.4552 |
| M03F4.7a                                                                |      | 0.37 |      | 0.73 | 0.0130 |
| M03F4.7a;M03F4.7b                                                       |      |      | 0.62 |      | 0.0488 |
| M110.4a;M110.4b;M110.4c;M110.4d;M110.4e                                 |      | 0.70 |      |      | 0.0950 |
| M110.4a;M110.4b;M110.4c;M110.4e                                         | 0.71 |      |      | 0.74 | 0.1131 |
| M110.4c;M110.4a;M110.4b;M110.4e                                         |      |      | 0.69 |      | 0.0882 |
| M117.2                                                                  | 0.77 | 0.93 | 0.71 |      | 0.1842 |
| M153.1                                                                  | 1.36 | 1.08 | 1.02 |      | 0.4363 |
| M176.2                                                                  |      |      |      | 1.44 | 0.2294 |
| R01E6.3a                                                                |      |      | 0.74 |      | 0.1305 |
| R01E6.3a;R01E6.3b                                                       | 0.00 | 1.03 |      | 1.01 | 0.4392 |
| R01H2.5                                                                 |      |      | 1.75 | 1.20 | 0.2214 |
| R02D3.1                                                                 | 1.09 |      | 0.82 | 0.00 | 0.3514 |
| R03A10.4a;R03A10.4b                                                     | 0.00 |      | 0.00 | 0.82 | 0.2072 |
| R03D7.6                                                                 | 1.55 | 0.00 | 0.00 | 0.60 | 0.3733 |
| R03G5.1a;F31E3.5;R03G5.1c;R03G5.1b                                      |      |      |      | 1.00 | 0.4154 |
| R03G5.1a;F31E3.5;R03G5.1c;R03G5.1d;R03G5.1b                             |      | 1.16 |      |      | 0.4190 |
| R03G5.1a;F31E3.5;R03G5.1d;R03G5.1c;R03G5.1b                             | 1.16 |      | 0.96 |      | 0.4764 |
| R04A9.4                                                                 | 1.65 |      |      |      | 0.1367 |
| R05D3.7                                                                 | 0.50 | 0.00 | 0.00 |      | 0.0101 |
| R05F9.10                                                                | 0.00 |      | 0.58 | 0.00 | 0.0318 |

|                                     |      |      |      |       |        |
|-------------------------------------|------|------|------|-------|--------|
| R05F9.12                            | 0.00 |      | 1.10 | 15.07 | 0.0004 |
| R05F9.6                             |      | 1.40 | 1.22 | 1.37  | 0.2954 |
| R05G6.7                             | 0.44 | 0.00 | 0.00 | 0.00  | 0.0035 |
| R06C7.1                             | 0.00 |      | 2.45 | 0.00  | 0.0186 |
| R06C7.10                            | 1.38 | 0.00 | 1.38 | 1.09  | 0.3302 |
| R06C7.5a;R06C7.5b                   | 0.00 | 0.00 |      | 1.32  | 0.3016 |
| R06F6.9                             | 0.00 | 0.90 | 0.83 | 0.49  | 0.1051 |
| R07B1.4                             |      | 1.01 | 0.82 | 0.70  | 0.2219 |
| R07E4.6b;R07E4.6a;R07E4.6c          |      | 0.96 | 1.49 | 1.13  | 0.4139 |
| R07E5.2                             | 0.00 | 0.93 | 0.84 | 0.60  | 0.1614 |
| R07G3.3a;R07G3.3b;R07G3.3c          | 0.00 | 0.00 | 0.68 | 0.00  | 0.0843 |
| R07H5.2a;R07H5.2b                   |      |      | 1.88 | 1.36  | 0.1583 |
| R07H5.8                             | 0.40 | 0.59 | 0.51 | 0.75  | 0.0202 |
| R08D7.3                             | 0.82 | 0.00 | 0.00 | 0.00  | 0.2025 |
| R08E5.2a;R08E5.2c;R08E5.2b          |      |      |      | 1.86  | 0.0820 |
| R09E12.3                            | 0.00 |      | 0.36 | 0.63  | 0.0070 |
| R09H10.5                            | 0.00 |      | 0.73 | 1.00  | 0.2457 |
| R102.4b;R102.4a;R102.4c             | 1.08 |      | 1.66 | 0.00  | 0.2851 |
| R107.7                              | 0.46 | 0.70 | 0.72 |       | 0.0458 |
| R10H10.1                            | 1.27 | 0.00 |      | 0.91  | 0.4956 |
| R119.3                              |      |      | 0.70 | 0.00  | 0.0933 |
| R11A5.4a;R11A5.4d;R11A5.4b          | 1.39 |      |      |       | 0.2566 |
| R11A5.4a;R11A5.4d;R11A5.4b;R11A5.4c |      | 0.80 | 0.97 | 0.89  | 0.2739 |
| R11A8.6                             | 0.00 | 0.00 | 0.61 | 0.32  | 0.0034 |
| R11D1.11                            | 0.00 | 0.00 | 3.39 | 2.46  | 0.0061 |
| R11E3.8                             | 1.28 | 1.91 |      | 0.85  | 0.3304 |
| R11H6.1                             |      | 0.83 | 0.77 | 0.89  | 0.2167 |
| R12C12.1a                           | 0.70 |      | 0.74 | 0.90  | 0.1581 |
| R12C12.1a;R12C12.1b                 |      | 0.25 |      |       | 0.0000 |
| R12E2.3                             |      | 0.00 | 1.55 | 0.87  | 0.4171 |
| R13A5.8                             | 0.89 | 0.73 | 0.94 | 0.82  | 0.2283 |
| R13F6.10                            |      |      | 0.79 | 0.45  | 0.0372 |
| R151.2a;R151.2c                     |      |      | 0.32 | 0.00  | 0.0001 |
| R151.3                              |      | 1.34 | 1.27 | 1.72  | 0.2326 |
| R31.1a;R31.1b                       | 0.00 | 1.97 | 0.46 | 0.00  | 0.3567 |
| R74.1                               |      | 1.65 | 1.10 | 1.10  | 0.3431 |
| T01C8.5                             | 3.50 |      | 0.00 | 1.00  | 0.0792 |
| T01D1.4                             | 0.00 |      | 1.45 | 2.69  | 0.0612 |
| T02B5.3                             | 0.00 |      | 0.79 | 0.00  | 0.1707 |
| T02G5.7                             | 0.80 |      | 0.00 | 1.04  | 0.3123 |
| T02G5.8                             | 0.00 | 1.00 | 0.00 | 0.00  | 0.4169 |
| T02G5.9a;T02G5.9b                   | 0.67 |      | 0.66 |       | 0.0721 |
| T02G5.9a;T02G5.9b;T02G5.9c          |      | 1.53 |      |       | 0.1850 |
| T03E6.7                             | 0.66 | 0.78 |      | 1.13  | 0.2225 |
| T03F1.3                             | 0.87 | 0.91 | 0.73 | 0.84  | 0.2191 |
| T03F1.8a;T03F1.8b                   | 0.00 |      |      | 0.86  | 0.2490 |
| T03F6.1                             | 1.17 | 0.99 |      |       | 0.4997 |
| T03F6.1;R08B4.5                     |      |      | 1.22 | 1.08  | 0.4322 |
| T03F6.3                             | 1.07 | 1.11 | 1.11 |       | 0.4769 |
| T04A8.7a                            | 1.33 |      | 1.43 | 1.30  | 0.2770 |
| T04F3.1                             | 0.00 | 0.89 | 0.00 | 0.77  | 0.2124 |
| T05B11.3                            | 0.86 | 1.72 |      | 1.28  | 0.3583 |

|                               |      |       |      |      |        |
|-------------------------------|------|-------|------|------|--------|
| T05C12.3                      | 0.00 | 0.00  | 0.00 | 1.29 | 0.3232 |
| T05C12.7                      |      | 0.94  | 0.85 | 0.77 | 0.2434 |
| T05D4.1                       | 0.75 | 0.75  | 0.88 | 0.99 | 0.2242 |
| T05E11.1                      | 1.71 | 1.72  | 0.00 | 6.17 | 0.0118 |
| T05E11.3                      | 0.72 | 0.69  | 0.66 | 0.92 | 0.1290 |
| T05G5.6                       | 1.19 |       | 0.96 | 1.16 | 0.4764 |
| T05H10.6a;T05H10.6b           | 1.96 | 1.59  |      | 1.08 | 0.1980 |
| T05H4.6                       | 0.97 |       | 1.00 | 0.00 | 0.3992 |
| T06D8.8                       |      |       | 1.02 | 0.95 | 0.3939 |
| T06G6.9                       |      | 0.46  | 0.63 | 1.26 | 0.1071 |
| T07A9.7                       |      |       | 0.00 | 0.57 | 0.0270 |
| T07A9.9a;T07A9.9b             |      |       | 1.63 | 1.12 | 0.2781 |
| T07C4.1                       | 1.84 |       | 1.43 | 0.98 | 0.2685 |
| T08B1.2a;T08B1.2b             |      |       | 5.54 | 0.00 | 0.0000 |
| T08B2.7a;T08B2.7b;T08B2.7c    | 0.61 |       |      | 0.82 | 0.1007 |
| T08B2.7c;T08B2.7a;T08B2.7b    |      |       | 1.31 |      | 0.3061 |
| T08B2.9a;T08B2.9b             | 0.00 | 0.00  | 1.11 | 1.44 | 0.3388 |
| T08G2.3                       | 0.81 | 1.00  | 0.86 |      | 0.2835 |
| T08H10.1                      | 1.01 | 1.28  | 1.30 |      | 0.4000 |
| T09A5.9                       | 0.00 | 0.75  | 0.85 | 0.61 | 0.1199 |
| T09B4.8                       |      | 0.60  | 0.93 | 0.70 | 0.1233 |
| T09F3.3;F33H1.2               |      | 0.97  | 0.78 | 0.78 | 0.2246 |
| T10B5.5a;T10B5.5b             | 1.28 | 1.46  | 1.17 |      | 0.3136 |
| T10B9.10                      |      | 0.43  |      |      | 0.0024 |
| T10E9.7a;T10E9.7b             | 1.06 |       |      | 1.23 | 0.4388 |
| T10F2.1a                      |      | 0.83  |      | 0.92 | 0.2668 |
| T10F2.1a;T10F2.1b             |      |       | 0.97 |      | 0.3783 |
| T10F2.4                       |      |       | 5.86 |      | 0.0000 |
| T12D8.8                       | 1.08 | 1.07  | 1.57 |      | 0.3747 |
| T12D8.9a;T12D8.9b             |      | 0.89  | 0.00 |      | 0.2863 |
| T14D7.1                       | 0.00 | 0.00  | 0.69 | 1.04 | 0.2357 |
| T14F9.1                       | 0.92 | 0.92  |      | 0.81 | 0.2750 |
| T14G8.3a;T14G8.3b             | 1.39 |       |      |      | 0.2556 |
| T14G8.3b;T14G8.3a             |      |       | 1.05 | 2.24 | 0.1843 |
| T16G1.11                      | 0.59 |       | 1.04 | 0.87 | 0.1945 |
| T17E9.2a;T17E9.2b             |      |       |      | 0.85 | 0.2370 |
| T18D3.4                       | 1.32 |       | 1.04 |      | 0.4109 |
| T18H9.2a;T18H9.2b             | 1.20 |       | 1.62 | 1.75 | 0.1965 |
| T19B10.2                      | 0.00 | 1.04  | 0.00 | 0.94 | 0.4038 |
| T19C4.6a;T19C4.6b             |      |       | 1.67 | 0.00 | 0.1316 |
| T19H12.2                      | 0.00 | 0.00  | 0.63 | 1.06 | 0.1995 |
| T20F5.2                       | 0.65 | 1.02  | 0.66 |      | 0.1441 |
| T20G5.1                       | 0.79 | 0.00  | 0.80 | 0.61 | 0.1183 |
| T20G5.2                       | 0.74 | 0.86  |      | 0.95 | 0.2337 |
| T20H4.3a                      | 1.00 | 0.59  |      | 1.00 | 0.2241 |
| T21B10.2c;T21B10.2a;T21B10.2b | 0.88 | 0.76  | 0.65 | 0.89 | 0.1733 |
| T21B10.7                      | 1.10 | 0.96  | 1.17 |      | 0.4974 |
| T21C12.2                      | 1.28 | 1.11  | 1.57 | 1.29 | 0.3120 |
| T21E3.3                       | 6.32 | 21.38 | 3.94 | 5.03 | 0.0000 |
| T21E8.3                       | 0.00 | 0.00  | 0.00 | 1.39 | 0.2561 |
| T21H3.1a                      |      |       | 1.32 | 1.09 | 0.3880 |
| T21H3.1a;T21H3.1b             | 0.73 |       |      |      | 0.1175 |

|                                                       |      |      |      |      |        |
|-------------------------------------------------------|------|------|------|------|--------|
| T22B11.5                                              | 1.13 |      | 1.24 | 1.18 | 0.4019 |
| T22D1.10                                              | 1.00 | 0.00 | 1.14 |      | 0.4955 |
| T22D1.3a;T22D1.3b                                     |      |      | 1.67 | 0.00 | 0.1332 |
| T22D1.9                                               | 1.39 | 0.00 | 1.09 | 1.12 | 0.3950 |
| T22E5.5                                               |      | 0.00 | 0.00 | 1.07 | 0.4968 |
| T22F3.3a                                              | 1.22 |      |      |      | 0.3745 |
| T22F3.3b;T22F3.3a                                     |      |      | 0.78 | 0.98 | 0.2621 |
| T22F3.4                                               |      | 0.53 | 0.63 | 0.00 | 0.0294 |
| T22H6.2a;T22H6.2b                                     | 0.46 |      | 0.00 |      | 0.0046 |
| T23D8.4                                               | 1.07 | 0.00 | 1.76 |      | 0.2662 |
| T23E7.2c;T23E7.2a;T23E7.2b;T23E7.2e                   |      |      |      | 0.08 | 0.0000 |
| T23E7.2c;T23E7.2e                                     | 0.17 | 0.00 |      |      | 0.0000 |
| T23F11.1                                              | 0.00 | 1.00 | 0.00 | 0.00 | 0.4162 |
| T23G5.1                                               |      |      | 1.41 |      | 0.2458 |
| T24H7.2                                               | 2.04 |      |      | 2.52 | 0.0295 |
| T24H7.2;F30B5.1                                       |      | 1.98 | 1.08 |      | 0.2156 |
| T25B9.1                                               | 0.00 | 0.00 | 0.00 | 0.80 | 0.1856 |
| T25B9.9                                               | 1.17 | 0.71 |      | 0.81 | 0.2693 |
| T25C8.2                                               | 0.00 | 1.60 | 1.00 |      | 0.3375 |
| T25G12.5                                              | 0.00 |      | 0.81 | 0.81 | 0.1970 |
| T26C5.1                                               | 1.23 | 0.66 |      | 0.73 | 0.2269 |
| T27A10.3a;T27A10.3b                                   |      |      | 3.01 |      | 0.0046 |
| T27A3.2                                               | 1.13 | 2.70 | 1.49 | 1.97 | 0.1132 |
| T27E9.1a;T27E9.1c;T27E9.1b                            |      | 1.56 | 0.93 | 1.46 | 0.3247 |
| T27E9.7                                               |      | 0.81 | 1.04 | 0.85 | 0.2927 |
| T28D9.1                                               |      |      | 1.47 | 1.00 | 0.3787 |
| T28H10.3                                              | 0.73 |      | 1.10 |      | 0.2901 |
| VF13D12L.1                                            | 2.05 |      | 1.27 | 0.89 | 0.2964 |
| VF13D12L.3                                            | 1.03 | 1.20 |      | 0.00 | 0.4653 |
| W02B12.10                                             |      |      | 1.84 |      | 0.0866 |
| W03C9.3                                               | 0.00 |      |      | 0.93 | 0.3284 |
| W03D2.4                                               | 2.48 |      | 0.00 | 1.27 | 0.1017 |
| W03F8.10                                              | 0.00 | 0.50 | 0.00 | 0.96 | 0.0934 |
| W03F9.1                                               | 0.71 |      |      |      | 0.1009 |
| W03G9.4                                               | 0.71 | 0.92 | 0.79 |      | 0.1897 |
| W04E12.8                                              | 0.00 |      |      | 0.72 | 0.1115 |
| W04G3.5a;W04G3.5b                                     | 0.00 |      | 3.83 | 0.00 | 0.0007 |
| W05G11.6a;W05G11.6d;W05G11.6b;W05G11.6c               | 1.27 | 1.08 | 1.03 |      | 0.4530 |
| W06E11.4                                              |      |      |      | 1.52 | 0.1904 |
| W06H3.3                                               |      | 0.00 | 1.03 | 1.63 | 0.3142 |
| W06H8.1a;W06H8.1c;W06H8.1d                            | 0.67 |      |      |      | 0.0752 |
| W06H8.1b;W06H8.1e;W06H8.1a;W06H8.1c                   |      |      | 1.67 |      | 0.1324 |
| W06H8.1b;W06H8.1e;W06H8.1c;W06H8.1d                   |      |      |      | 0.72 | 0.1121 |
| W06H8.1b;W06H8.1e;W06H8.1c;W06H8.1f                   |      | 0.78 |      |      | 0.1610 |
| W06H8.8e;W06H8.8g;W06H8.8b                            |      |      | 0.30 |      | 0.0000 |
| W06H8.8e;W06H8.8g;W06H8.8d;W06H8.8b                   |      |      |      | 0.77 | 0.1600 |
| W06H8.8f;W06H8.8e;W06H8.8g;W06H8.8b;T11B7.2b;T11B7.2c |      | 0.61 |      |      | 0.0439 |
| W06H8.8f;W06H8.8e;W06H8.8g;W06H8.8d;W06H8.8b          | 0.82 |      |      |      | 0.2050 |
| W07B8.5                                               | 1.59 | 1.11 | 1.35 | 2.05 | 0.2049 |
| W07E11.1                                              | 1.92 | 0.00 | 2.10 | 2.01 | 0.0565 |
| W07G4.4                                               |      | 0.44 | 0.67 | 0.71 | 0.0361 |
| W08E12.7                                              | 0.48 | 0.61 |      | 0.82 | 0.0486 |

|                                             |      |      |      |      |        |
|---------------------------------------------|------|------|------|------|--------|
| W08E3.3                                     | 1.03 |      | 1.19 | 1.14 | 0.4575 |
| W08E3.3;W08E3.3b                            |      | 0.94 |      |      | 0.3414 |
| W08G11.4                                    | 1.78 | 0.00 | 0.00 | 1.22 | 0.2110 |
| W09B6.1a;W09B6.1b                           | 1.32 | 1.18 |      | 1.22 | 0.3588 |
| W09C2.3b;W09C2.3a;W09C2.3c                  |      |      | 1.75 |      | 0.1095 |
| W09H1.5                                     | 0.82 |      |      |      | 0.2069 |
| W09H1.6a;W09H1.6b                           |      | 0.00 | 1.05 | 1.15 | 0.4768 |
| W10C8.5                                     |      |      |      | 0.68 | 0.0819 |
| W10C8.5;F32B5.1                             |      | 0.82 | 0.94 |      | 0.2701 |
| Y102A5A.1                                   | 0.83 | 0.63 |      |      | 0.1139 |
| Y102A5A.1;F13E9.14                          |      |      | 1.78 |      | 0.0996 |
| Y105C5B.28a;Y105C5B.28b                     |      |      | 1.15 |      | 0.4285 |
| Y105C5B.28b                                 | 1.20 |      |      | 1.32 | 0.3419 |
| Y105C5B.28b;Y105C5B.28a                     |      | 1.82 |      |      | 0.0916 |
| Y105C5B.9                                   | 0.00 |      | 0.63 | 1.13 | 0.2332 |
| Y105E8A.19                                  |      | 0.97 | 1.16 | 1.10 | 0.4997 |
| Y105E8A.22                                  |      |      | 0.58 | 0.75 | 0.0681 |
| Y105E8A.4                                   | 0.00 |      |      | 1.55 | 0.1768 |
| Y105E8B.1a;Y105E8B.1d;Y105E8B.1b            |      | 0.96 |      |      | 0.3679 |
| Y105E8B.1a;Y105E8B.1d;Y105E8B.1b;Y105E8B.1f |      |      |      | 0.88 | 0.2754 |
| Y105E8B.1a;Y105E8B.1f                       | 0.74 |      | 0.50 |      | 0.0406 |
| Y105E8B.5                                   | 0.98 | 0.99 | 0.99 |      | 0.3999 |
| Y106G6H.2a;Y106G6H.2b;Y106G6H.2c            | 1.22 | 1.23 | 1.36 |      | 0.3366 |
| Y110A7A.14                                  | 0.00 | 1.05 |      | 1.84 | 0.2574 |
| Y110A7A.19                                  | 0.00 | 0.00 | 2.41 | 0.74 | 0.2900 |
| Y110A7A.6a                                  | 0.00 | 0.00 | 0.89 | 0.59 | 0.1138 |
| Y110A7A.6b                                  | 0.67 | 0.40 | 0.00 | 0.00 | 0.0128 |
| Y111B2A.14b;Y111B2A.14a                     |      | 0.95 |      |      | 0.3545 |
| Y113G7A.9a                                  | 0.69 |      | 1.05 |      | 0.2371 |
| Y113G7B.17                                  | 0.25 | 0.74 | 0.54 |      | 0.0049 |
| Y116A8A.9                                   |      |      | 1.19 | 1.29 | 0.3585 |
| Y116A8C.28c                                 |      |      |      | 1.30 | 0.3103 |
| Y17G7B.7                                    | 1.18 | 1.16 | 0.98 |      | 0.4711 |
| Y18D10A.17                                  |      | 1.98 | 1.27 | 1.39 | 0.1901 |
| Y18H1A.4                                    | 0.00 | 0.00 | 0.00 | 1.86 | 0.0825 |
| Y22D7AL.5a                                  | 0.93 | 0.74 | 0.78 | 0.93 | 0.2261 |
| Y23H5A.7b;Y23H5A.7a                         | 0.30 | 0.97 |      | 1.02 | 0.0744 |
| Y24D9A.4a;Y24D9A.4c;Y73B3A.18a;Y73B3A.1     | 1.18 |      | 1.57 |      | 0.2734 |
| Y24D9A.4a;Y24D9A.4c;Y73B3A.18b              |      |      |      | 1.52 | 0.1907 |
| Y24D9A.4c;Y73B3A.18b                        |      | 1.29 |      |      | 0.3191 |
| Y24D9A.8a;Y24D9A.8b                         | 1.31 | 1.04 |      | 1.00 | 0.4700 |
| Y24F12A.2                                   | 0.00 |      | 1.10 | 0.52 | 0.1410 |
| Y32B12B.4                                   |      | 0.39 | 0.00 | 0.00 | 0.0011 |
| Y32H12A.8                                   | 0.00 | 0.00 | 4.38 | 0.00 | 0.0002 |
| Y37A1B.1a                                   |      |      | 2.12 |      | 0.0427 |
| Y37E3.10                                    |      | 0.65 | 0.00 | 0.44 | 0.0163 |
| Y37E3.17a;Y37E3.17b                         |      | 0.00 | 0.79 | 0.95 | 0.2613 |
| Y38A10A.5                                   |      | 0.88 | 0.64 | 1.03 | 0.2215 |
| Y38A8.2                                     |      |      | 0.51 | 0.87 | 0.0738 |
| Y38A8.3;K09C6.4                             |      |      |      | 2.07 | 0.0478 |
| Y38F1A.6                                    | 1.22 | 0.00 |      | 1.25 | 0.3593 |
| Y38F2AL.3a;Y38F2AL.3b                       | 0.92 | 0.89 |      | 0.97 | 0.3268 |

|                                  |      |      |      |      |        |
|----------------------------------|------|------|------|------|--------|
| Y39B6A.20                        |      | 1.07 | 1.02 | 1.29 | 0.4556 |
| Y39E4A.3a;Y39E4A.3b              |      | 1.20 | 1.15 | 3.96 | 0.1053 |
| Y39E4B.1                         |      |      | 1.41 |      | 0.2426 |
| Y39G8B.1a;Y39G8B.1b              | 0.73 | 0.91 | 0.59 | 0.71 | 0.1161 |
| Y40B10A.2                        | 0.00 |      | 1.23 | 1.13 | 0.4058 |
| Y41D4B.11                        | 0.00 | 1.18 | 0.00 |      | 0.4064 |
| Y41E3.10a                        | 0.69 | 0.65 | 0.57 | 0.82 | 0.0796 |
| Y41E3.4a;Y41E3.4c                |      | 1.15 | 1.24 | 1.04 | 0.4407 |
| Y43B11AR.4                       | 1.09 | 0.00 | 1.08 |      | 0.4851 |
| Y43F4B.5a                        | 0.60 | 0.89 | 0.76 |      | 0.1282 |
| Y43F8C.13                        | 1.04 |      | 1.54 | 1.60 | 0.2685 |
| Y45F10D.12                       | 1.37 | 1.27 |      | 1.15 | 0.3410 |
| Y45F3A.3a;Y45F3A.3b              | 1.18 | 0.00 |      | 1.26 | 0.3707 |
| Y45G12B.1a;Y45G12B.1b            |      |      |      | 0.59 | 0.0333 |
| Y45G12B.1a;Y45G12B.1c;Y45G12B.1b | 0.51 |      | 0.00 |      | 0.0115 |
| Y45G12C.2                        |      | 1.67 | 1.68 | 0.76 | 0.3225 |
| Y46G5A.19a;Y46G5A.19b            |      | 0.00 |      | 0.98 | 0.3868 |
| Y46G5A.19b;Y46G5A.19a            | 2.21 |      | 1.51 |      | 0.0896 |
| Y46G5A.31                        |      |      | 1.35 | 1.26 | 0.3114 |
| Y46H3A.2                         |      |      | 4.75 |      | 0.0001 |
| Y47D3A.25                        | 0.72 |      | 0.91 | 0.00 | 0.1977 |
| Y47D3B.10                        |      | 0.62 | 0.51 | 1.01 | 0.0833 |
| Y47G6A.21                        | 1.74 | 3.00 | 2.71 | 2.02 | 0.0261 |
| Y47G6A.22                        |      |      | 0.91 | 1.39 | 0.4539 |
| Y47G6A.6                         |      | 0.00 | 1.54 | 0.00 | 0.1801 |
| Y48B6A.12;F33D11.8               |      | 1.15 | 1.37 | 1.23 | 0.3530 |
| Y48E1B.10                        | 0.78 |      |      | 0.45 | 0.0340 |
| Y48G10A.1                        | 0.00 |      | 0.94 | 0.87 | 0.2995 |
| Y48G8AL.5                        | 0.00 | 0.00 | 0.00 | 0.93 | 0.3327 |
| Y48G8AL.8a;Y48G8AL.8b            | 1.67 | 1.08 | 1.25 | 1.49 | 0.2784 |
| Y49A3A.2                         |      | 0.81 | 0.87 | 0.80 | 0.2121 |
| Y49E10.1                         | 1.34 | 1.23 | 1.56 | 1.15 | 0.3057 |
| Y50D4B.3                         | 0.00 |      | 1.83 | 0.00 | 0.0894 |
| Y50D7A.4                         | 1.90 |      | 1.29 |      | 0.1714 |
| Y53F4B.29                        | 1.00 | 0.49 | 0.64 |      | 0.0829 |
| Y53F4B.30                        | 2.63 |      | 4.11 | 1.24 | 0.0224 |
| Y53F4B.31                        | 0.83 | 0.84 | 0.80 |      | 0.2070 |
| Y53F4B.33                        | 2.44 | 2.03 | 1.55 | 0.98 | 0.1357 |
| Y53F4B.39a                       |      | 0.27 | 2.65 |      | 0.2273 |
| Y53F4B.39a;Y53F4B.39b            | 1.26 |      |      | 1.08 | 0.4161 |
| Y53G8AR.2a                       | 1.10 |      | 0.00 | 0.00 | 0.4742 |
| Y54E10A.3                        | 0.00 | 0.00 | 1.71 | 0.00 | 0.1200 |
| Y54E10A.6                        |      |      |      | 1.20 | 0.3857 |
| Y54E2A.11a                       |      |      |      | 0.97 | 0.3800 |
| Y54E2A.11a;Y54E2A.11b            | 2.53 | 1.11 |      |      | 0.1305 |
| Y54F10BM.2                       | 0.67 |      | 0.00 | 0.00 | 0.0764 |
| Y54G11A.6;Y54G11A.13             |      |      | 1.11 |      | 0.4666 |
| Y54G11A.7                        | 0.78 | 0.00 | 0.69 | 0.86 | 0.1586 |
| Y54G2A.45                        |      |      | 0.00 | 1.01 | 0.4324 |
| Y54G9A.6                         | 0.00 | 0.00 | 3.92 | 0.00 | 0.0005 |
| Y55B1BR.2                        | 0.00 |      |      | 3.17 | 0.0031 |
| Y55F3AM.13                       | 0.00 | 0.00 | 1.05 | 1.20 | 0.4555 |

|                                                   |      |      |       |      |        |
|---------------------------------------------------|------|------|-------|------|--------|
| Y55F3AR.3                                         | 0.95 | 0.93 | 0.93  | 0.87 | 0.3198 |
| Y55F3BR.6                                         | 3.70 |      |       |      | 0.0009 |
| Y57A10A.23                                        | 0.00 | 0.00 | 0.00  | 0.51 | 0.0116 |
| Y57A10C.6                                         | 0.79 | 0.64 | 0.80  | 0.79 | 0.1387 |
| Y57G11B.5                                         | 0.00 |      | 1.24  | 1.36 | 0.3121 |
| Y57G11C.10b                                       | 0.71 |      |       | 1.09 | 0.2708 |
| Y57G11C.10b;Y57G11C.10a                           |      | 1.20 | 0.92  |      | 0.4766 |
| Y57G11C.34                                        | 0.67 |      | 0.97  | 0.00 | 0.1933 |
| Y59A8B.10a                                        | 0.00 |      | 1.23  | 2.28 | 0.1316 |
| Y62H9A.9                                          |      | 3.06 |       | 0.00 | 0.0040 |
| Y63D3A.5                                          | 1.42 |      | 3.22  |      | 0.0409 |
| Y65B4A.8                                          | 1.29 |      | 1.33  | 0.99 | 0.3932 |
| Y65B4BL.2                                         |      |      | 0.00  | 3.83 | 0.0007 |
| Y65B4BR.5a;Y65B4BR.5b                             |      | 1.02 | 1.17  | 1.36 | 0.4070 |
| Y66A7A.6                                          |      |      | 0.50  | 0.91 | 0.0773 |
| Y66D12A.9                                         | 1.22 | 1.45 |       | 0.90 | 0.4169 |
| Y66H1B.2a;Y66H1B.2f;Y66H1B.2c;Y66H1B.2b;Y66H1B.2e |      |      |       | 0.76 | 0.1456 |
| Y66H1B.2a;Y66H1B.2f;Y66H1B.2g;Y66H1B.2b;Y66H1B.2e |      |      | 1.46  |      | 0.2173 |
| Y66H1B.2a;Y66H1B.2g;Y66H1B.2c;Y66H1B.2b;Y66H1B.2e |      | 0.87 |       |      | 0.2606 |
| Y66H1B.2a;Y66H1B.2g;Y66H1B.2f;Y66H1B.2c           | 0.93 |      |       |      | 0.3258 |
| Y67D8C.5                                          | 0.00 | 0.00 | 3.26  | 0.00 | 0.0025 |
| Y69A2AR.18b;Y69A2AR.18a                           | 0.48 | 0.92 |       |      | 0.0691 |
| Y69A2AR.18b;Y69A2AR.18a;Y69A2AR.18c               |      |      |       | 2.13 | 0.0418 |
| Y69F12A.2a;Y69F12A.2b                             | 0.69 | 0.67 |       | 1.28 | 0.2287 |
| Y6B3B.3                                           | 2.31 | 0.00 |       | 0.00 | 0.0262 |
| Y71A12B.1                                         | 1.03 |      | 1.08  | 1.08 | 0.4911 |
| Y71A12B.17                                        |      |      | 3.67  |      | 0.0009 |
| Y71D11A.3b;Y71D11A.3a                             |      |      | 2.95  |      | 0.0052 |
| Y71F9AL.13a;Y71F9AL.13b                           | 1.00 | 1.23 | 1.21  | 1.12 | 0.4440 |
| Y71F9AL.17                                        |      | 1.83 | 0.00  | 1.44 | 0.1473 |
| Y71G12B.6                                         | 1.32 | 1.05 | 1.01  |      | 0.4569 |
| Y71H10A.1a                                        |      | 0.86 |       |      | 0.2554 |
| Y71H10A.1a;Y71H10A.1b                             | 0.94 |      | 0.00  | 0.00 | 0.3379 |
| Y71H10B.1b;Y71H10B.1a                             | 0.00 |      | 1.10  | 0.00 | 0.4787 |
| Y71H10B.1c                                        | 0.00 |      | 0.00  | 0.60 | 0.0393 |
| Y71H2AM.11                                        |      | 0.00 | 0.37  | 0.97 | 0.0374 |
| Y71H2AM.23                                        |      | 0.85 | 0.73  | 0.94 | 0.2245 |
| Y73B3A.11                                         | 0.66 |      |       |      | 0.0714 |
| Y73B3B.1                                          |      | 0.40 | 0.00  |      | 0.0012 |
| Y73B6BL.24                                        | 1.15 | 1.31 | 1.09  |      | 0.4081 |
| Y73B6BL.6a;Y73B6BL.6b                             | 0.00 | 0.82 | 0.00  | 0.95 | 0.2784 |
| Y73F8A.6                                          |      |      | 0.67  |      | 0.0763 |
| Y74C9A.3                                          | 0.00 |      | 1.31  | 0.00 | 0.3067 |
| Y76B12C.2                                         |      | 6.78 | 0.00  |      | 0.0000 |
| Y80D3A.1                                          | 0.84 |      | 0.69  |      | 0.0863 |
| Y82E9BR.14b;Y82E9BR.14a                           |      | 0.00 | 0.42  | 0.45 | 0.0029 |
| Y87G2A.16                                         | 0.00 | 0.00 | 86.69 | 0.00 | 0.0000 |
| Y87G2A.5                                          | 0.96 | 0.00 | 0.86  | 0.69 | 0.1581 |
| Y87G2A.6                                          |      |      | 0.94  | 0.00 | 0.3401 |
| Y87G2A.8a                                         | 1.29 | 0.88 | 0.81  | 0.95 | 0.2709 |
| ZC101.2e;ZC101.2b                                 |      | 0.00 | 0.54  | 0.00 | 0.0169 |
| ZC247.2                                           | 0.00 | 1.21 |       |      | 0.3784 |

|                                                                   |      |      |      |      |        |
|-------------------------------------------------------------------|------|------|------|------|--------|
| ZC373.1                                                           | 0.68 | 0.75 |      | 0.96 | 0.2327 |
| ZC373.4                                                           | 0.00 | 0.00 | 0.00 | 1.07 | 0.4921 |
| ZC395.10                                                          | 0.00 | 2.80 | 1.91 | 2.63 | 0.0202 |
| ZC416.6                                                           |      |      | 0.00 | 2.47 | 0.0174 |
| ZC434.2                                                           | 0.79 |      | 0.97 | 1.12 | 0.4648 |
| ZC434.5                                                           | 0.66 | 0.72 | 0.84 |      | 0.1639 |
| ZC434.8                                                           | 0.86 | 0.82 | 0.88 | 0.93 | 0.2681 |
| ZC8.4d;ZC8.4a;ZC8.4b                                              |      |      | 0.37 |      | 0.0006 |
| ZK1010.1;F25B5.4a                                                 |      |      | 0.66 | 0.72 | 0.0890 |
| ZK1010.1;F25B5.4c;F25B5.4a                                        |      | 2.09 |      |      | 0.0465 |
| ZK1058.1                                                          | 1.18 | 1.77 | 0.00 | 1.13 | 0.2411 |
| ZK1073.1                                                          | 1.19 |      | 1.26 | 1.61 | 0.2375 |
| ZK1098.10d;ZK1098.10a;ZK1098.10b;ZK1098.10e;ZK1098.10f;ZK1098.10c |      |      | 0.00 | 1.45 | 0.2226 |
| ZK1127.10                                                         | 1.00 | 0.90 | 0.93 | 0.84 | 0.2806 |
| ZK1307.1a                                                         | 1.18 | 1.01 | 1.14 |      | 0.4977 |
| ZK1307.8                                                          | 0.93 | 0.00 | 0.00 | 1.07 | 0.4945 |
| ZK180.4                                                           | 1.27 | 1.86 | 1.30 | 2.26 | 0.1046 |
| ZK185.3                                                           |      |      | 2.36 |      | 0.0232 |
| ZK287.1                                                           | 0.00 | 1.17 | 0.00 | 0.00 | 0.4105 |
| ZK353.6                                                           | 0.92 | 0.66 | 0.84 | 0.75 | 0.1317 |
| ZK455.1                                                           | 0.97 | 0.69 | 0.82 | 0.74 | 0.1365 |
| ZK470.5a;ZK470.5b                                                 |      |      | 0.83 | 1.53 | 0.4492 |
| ZK593.1a;ZK593.1b;ZK593.1c                                        | 1.97 | 1.52 | 1.55 | 1.54 | 0.1818 |
| ZK593.4                                                           | 1.38 | 2.51 |      | 1.34 | 0.0874 |
| ZK6.7a;ZK6.7b                                                     |      |      | 0.00 | 1.06 | 0.4809 |
| ZK617.1b;ZK617.1a                                                 |      | 0.66 |      |      | 0.0676 |
| ZK617.1b;ZK617.1a;ZK617.1c                                        | 1.53 |      |      | 0.93 | 0.3311 |
| ZK617.1b;ZK617.1c;ZK617.1a                                        |      |      | 1.02 |      | 0.4409 |
| ZK622.3b;ZK622.3a;ZK622.3c                                        | 1.44 |      |      | 0.92 | 0.3228 |
| ZK622.3d;ZK622.3a;ZK622.3c                                        |      | 1.10 | 1.26 |      | 0.4098 |
| ZK632.4                                                           |      | 1.35 | 0.00 | 0.00 | 0.2836 |
| ZK652.9                                                           | 2.05 |      | 2.00 |      | 0.0128 |
| ZK673.2                                                           | 1.05 |      | 1.08 | 1.22 | 0.4315 |
| ZK688.3                                                           | 0.76 | 1.26 | 1.27 | 0.81 | 0.4823 |
| ZK688.6b;ZK688.6a                                                 | 1.10 |      | 0.87 | 0.81 | 0.2244 |
| ZK783.2                                                           |      | 0.00 | 0.87 |      | 0.2571 |
| ZK809.2                                                           | 0.00 | 0.00 | 9.27 | 0.00 | 0.0000 |
| ZK829.1                                                           | 0.00 | 0.00 | 3.63 | 0.00 | 0.0010 |
| ZK829.4                                                           | 0.97 | 0.87 |      | 0.85 | 0.2514 |
| ZK909.3                                                           |      | 0.73 |      | 0.00 | 0.1218 |
| ZK945.2                                                           | 1.07 | 0.89 | 0.65 | 0.66 | 0.1157 |
| ZK973.6                                                           | 0.82 | 1.02 |      | 1.39 | 0.3952 |
